# Supplementary material for: Binding and sequestration of poison frog alkaloids by a plasma globulin
Source: eLife journal article supplement (doi:10.7554/elife.85096), 2023-12-14
Supplement: fig2-data1 [file counts_comparison_across_conditions.xlsx]

## Sheet: global
Rank_Number	Protein_Name	photoprobe_R1	photoprobe_R2	photoprobe+PTX_R1	photoprobe+PTX_R2	no_photoprobe_R1	no_photoprobe_R2	Contaminant	Max	Sum	AAs
1	>OopSylGTT00000004675 gene=OopSylGTG00000004439 name=serpina1_4 seq_id=scaffold_1 type=cds	1085	1364	430	451	416	526	0	1364	4272	414
2	>OopSylGTT00000003067 gene=OopSylGTG00000002923 seq_id=scaffold_1 type=cds	852	1117	845	1141	1022	1276	0	1276	6253	610
3	>OopSylGTT00000032541 gene=OopSylGTG00000030692 name=a2m_6 seq_id=scaffold_3 type=cds	1015	612	896	583	837	590	0	1015	4533	541
4	>OopSylGTT00000004682 gene=OopSylGTG00000004445 name=serpina1_2 seq_id=scaffold_1 type=cds	525	644	781	875	737	1005	0	1005	4567	414
5	>OopSylGTT00000032545 gene=OopSylGTG00000030695 name=a2m seq_id=scaffold_3 type=cds	687	191	732	203	867	223	0	867	2903	602
6	>OopSylGTT00000029077 gene=OopSylGTG00000027514 seq_id=scaffold_3 type=cds	514	159	96	155	370	226	0	514	1520	242
7	>OopSylGTT00000032628 gene=OopSylGTG00000030772 name=a1m_3 seq_id=scaffold_3 type=cds	402	175	418	172	513	208	0	513	1888	546
8	>OopSylGTT00000040917 gene=OopSylGTG00000038565 name=c3_18 seq_id=scaffold_4 type=cds	357	324	384	348	496	330	0	496	2239	781
9	>OopSylGTT00000040876 gene=OopSylGTG00000038530 seq_id=scaffold_4 type=cds	314	159	335	180	466	196	0	466	1650	1662
10	>OopSylGTT00000032572 gene=OopSylGTG00000030721 name=a2ml1 seq_id=scaffold_3 type=cds	332	129	345	168	420	199	0	420	1593	383
11	>OopSylGTT00000064850 gene=OopSylGTG00000061107 name=serpinc1 seq_id=scaffold_9 type=cds	211	285	209	305	281	364	0	364	1655	454
12	>OopSylGTT00000004626 gene=OopSylGTG00000004393 seq_id=scaffold_1 type=cds	178	226	138	179	172	356	0	356	1249	427
13	>OopSylGTT00000040863 gene=OopSylGTG00000038518 name=c3_2 seq_id=scaffold_4 type=cds	216	155	208	224	351	193	0	351	1347	857
14	>OopSylGTT00000032607 gene=OopSylGTG00000030753 name=a2ml1_12 seq_id=scaffold_3 type=cds	309	108	343	115	277	208	0	343	1360	289
15	>OopSylGTT00000001804 gene=OopSylGTG00000001716 name=fga seq_id=scaffold_1 type=cds	189	194	207	220	326	212	0	326	1348	513
16	>OopSylGTT00000032671 gene=OopSylGTG00000030811 name=a2m_5 seq_id=scaffold_3 type=cds	104	68	130	83	318	75	0	318	778	382
17	>OopSylGTT00000042660 gene=OopSylGTG00000040210 name=tf-a seq_id=scaffold_5 type=cds	NaN	NaN	NaN	NaN	300	NaN	0	300	300	560
18	>OopSylGTT00000001810 gene=OopSylGTG00000001722 name=fgb seq_id=scaffold_1 type=cds	176	213	200	226	271	253	0	271	1339	489
19	>OopSylGTT00000042659 gene=OopSylGTG00000040209 name=tf-a_2 seq_id=scaffold_5 type=cds	203	125	223	177	NaN	166	0	223	894	571
20	>OopSylGTT00000009249 gene=OopSylGTG00000008777 name=ighm seq_id=scaffold_1 type=cds	153	79	203	118	217	103	0	217	873	465
21	>OopSylGTT00000032691 gene=OopSylGTG00000030831 name=a2m_9 seq_id=scaffold_3 type=cds	160	96	153	70	209	88	0	209	776	264
22	>OopSylGTT00000034189 gene=OopSylGTG00000032208 name=havcr1_2 seq_id=scaffold_4 type=cds	120	191	110	177	172	205	0	205	975	462
23	>OopSylGTT00000032544 gene=OopSylGTG00000030695 name=a2m seq_id=scaffold_3 type=cds	124	34	130	23	204	50	0	204	565	195
24	>OopSylGTT00000066733 gene=OopSylGTG00000062898 seq_id=scaffold_10 type=cds	154	29	187	41	172	52	0	187	635	1967
25	>OopSylGTT00000042653 gene=OopSylGTG00000040203 seq_id=scaffold_5 type=cds	120	78	134	84	179	80	0	179	675	912
26	>OopSylGTT00000032699 gene=OopSylGTG00000030839 name=a2m_4 seq_id=scaffold_3 type=cds	124	66	173	65	103	85	0	173	616	1075
27	>OopSylGTT00000001801 gene=OopSylGTG00000001713 name=fgg seq_id=scaffold_1 type=cds	NaN	NaN	121	NaN	164	NaN	0	164	285	437
28	>OopSylGTT00000001802 gene=OopSylGTG00000001714 name=fgg_2 seq_id=scaffold_1 type=cds	92	122	NaN	127	NaN	147	0	147	488	432
29	>OopSylGTT00000040916 gene=OopSylGTG00000038565 name=c3_18 seq_id=scaffold_4 type=cds	89	36	101	36	146	36	0	146	444	294
30	>OopSylGTT00000058900 gene=OopSylGTG00000055546 seq_id=scaffold_8 type=cds	135	90	127	100	113	92	0	135	657	446
31	>OopSylGTT00000009254 gene=OopSylGTG00000008781 seq_id=scaffold_1 type=cds	110	80	97	134	133	106	0	134	660	422
32	>OopSylGTT00000032690 gene=OopSylGTG00000030830 name=a2ml1_7 seq_id=scaffold_3 type=cds	47	27	62	26	130	31	0	130	323	315
33	>OopSylGTT00000007447 gene=OopSylGTG00000007049 name=bche_2 seq_id=scaffold_1 type=cds	74	102	72	107	117	123	0	123	595	456
34	>OopSylGTT00000003076 gene=OopSylGTG00000002930 name=alb_4 seq_id=scaffold_1 type=cds	71	114	82	110	76	123	0	123	576	405
35	>OopSylGTT00000013371 gene=OopSylGTG00000012640 name=hpx seq_id=scaffold_2 type=cds	55	49	58	47	121	43	0	121	373	416
36	>OopSylGTT00000057749 gene=OopSylGTG00000054473 seq_id=scaffold_7 type=cds	60	21	57	26	119	25	0	119	308	147
37	>OopSylGTT00000063957 gene=OopSylGTG00000060289 name=pxn1_5 seq_id=scaffold_9 type=cds	89	43	101	49	111	57	0	111	450	741
38	>OopSylGTT00000065554 gene=OopSylGTG00000061768 name=cfh_2 seq_id=scaffold_9 type=cds	49	25	71	29	107	25	0	107	306	554
39	>OopSylGTT00000032666 gene=OopSylGTG00000030806 name=mug1 seq_id=scaffold_3 type=cds	58	26	56	27	106	38	0	106	311	624
40	>OopSylGTT00000040858 gene=OopSylGTG00000038514 name=c3_9 seq_id=scaffold_4 type=cds	85	53	67	61	102	45	0	102	413	265
41	>OopSylGTT00000058873 gene=OopSylGTG00000055521 name=cfb_2 seq_id=scaffold_8 type=cds	53	50	50	52	102	66	0	102	373	727
42	>OopSylGTT00000004649 gene=OopSylGTG00000004413 seq_id=scaffold_1 type=cds	68	87	53	62	84	97	0	97	451	323
43	>OopSylGTT00000029070 gene=OopSylGTG00000027509 name=apoa4_2 seq_id=scaffold_3 type=cds	36	69	12	67	96	57	0	96	337	367
44	>OopSylGTT00000040910 gene=OopSylGTG00000038563 name=c3_17 seq_id=scaffold_4 type=cds	39	NaN	36	15	95	15	0	95	200	161
45	>OopSylGTT00000040974 gene=OopSylGTG00000038615 name=gip_12 seq_id=scaffold_4 type=cds	52	41	58	48	93	48	0	93	340	166
46	>OopSylGTT00000064194 gene=OopSylGTG00000060513 seq_id=scaffold_9 type=cds	67	22	74	28	90	40	0	90	321	1118
47	>OopSylGTT00000064198 gene=OopSylGTG00000060516 seq_id=scaffold_9 type=cds	59	7	74	21	87	19	0	87	267	1118
48	>OopSylGTT00000040824 gene=OopSylGTG00000038481 seq_id=scaffold_4 type=cds	56	33	81	38	50	32	0	81	290	1135
49	>OopSylGTT00000032662 gene=OopSylGTG00000030802 name=a2ml1_8 seq_id=scaffold_3 type=cds	29	8	47	10	81	10	0	81	185	516
50	>OopSylGTT00000057750 gene=OopSylGTG00000054474 seq_id=scaffold_7 type=cds	79	29	43	29	66	35	0	79	281	142
51	>OopSylGTT00000052023 gene=OopSylGTG00000049128 name=cndp1 seq_id=scaffold_6 type=cds	48	75	48	78	43	72	0	78	364	490
52	>OopSylGTT00000042708 gene=OopSylGTG00000040254 seq_id=scaffold_5 type=cds	63	30	78	32	67	35	0	78	305	293
53	>OopSylGTT00000004627 gene=OopSylGTG00000004394 name=serpina1_3 seq_id=scaffold_1 type=cds	58	76	49	57	60	68	0	76	368	426
54	>OopSylGTT00000013258 gene=OopSylGTG00000012532 name=c9_2 seq_id=scaffold_1 type=cds	67	45	51	50	47	43	0	67	303	284
55	>OopSylGTT00000040949 gene=OopSylGTG00000038591 seq_id=scaffold_4 type=cds	45	51	40	41	66	55	0	66	298	152
56	>OopSylGTT00000032704 gene=OopSylGTG00000030844 name=a2ml1_11 seq_id=scaffold_3 type=cds	58	41	66	34	54	36	0	66	289	537
57	>OopSylGTT00000061211 gene=OopSylGTG00000057704 name=fcn1-a seq_id=scaffold_8 type=cds	32	44	25	43	66	41	0	66	251	346
58	>OopSylGTT00000067237 gene=OopSylGTG00000063367 name=f2_2 seq_id=scaffold_10 type=cds	34	23	49	28	64	NaN	0	64	198	580
59	>OopSylGTT00000042158 gene=OopSylGTG00000039731 name=apob seq_id=scaffold_5 type=cds	62	4	57	5	56	11	0	62	195	690
60	>OopSylGTT00000030672 gene=OopSylGTG00000028939 seq_id=scaffold_3 type=cds	24	3	3	2	61	4	0	61	97	143
61	>OopSylGTT00000065399 gene=OopSylGTG00000061623 seq_id=scaffold_9 type=cds	51	44	60	56	42	51	0	60	304	540
62	>OopSylGTT00000042760 gene=OopSylGTG00000040304 name=gas6_2 seq_id=scaffold_5 type=cds	28	54	26	36	58	60	0	60	262	414
63	>OopSylGTT00000000192 gene=OopSylGTG00000000185 seq_id=scaffold_1 type=cds	58	13	24	13	20	24	0	58	152	119
64	>OopSylGTT00000042699 gene=OopSylGTG00000040248 seq_id=scaffold_5 type=cds	27	20	33	25	53	12	0	53	170	165
65	>OopSylGTT00000058486 gene=OopSylGTG00000055183 name=ckm seq_id=scaffold_8 type=cds	29	29	19	27	52	34	0	52	190	381
66	>OopSylGTT00000025723 gene=OopSylGTG00000024340 name=aoc3_2 seq_id=scaffold_3 type=cds	30	17	31	14	48	22	0	48	162	530
67	>OopSylGTT00000070017 gene=OopSylGTG00000066021 seq_id=scaffold_506 type=cds	21	7	10	8	48	7	0	48	101	118
68	>OopSylGTT00000043473 gene=OopSylGTG00000040983 name=arhgef26_2 seq_id=scaffold_5 type=cds	NaN	NaN	NaN	NaN	47	NaN	0	47	47	757
69	>OopSylGTT00000042671 gene=OopSylGTG00000040221 seq_id=scaffold_5 type=cds	24	17	26	14	46	18	0	46	145	263
70	>OopSylGTT00000004665 gene=OopSylGTG00000004429 name=serpina12 seq_id=scaffold_1 type=cds	30	45	35	32	40	33	0	45	215	305
71	>OopSylGTT00000013256 gene=OopSylGTG00000012530 name=c9 seq_id=scaffold_1 type=cds	16	14	14	13	45	9	0	45	111	161
72	>OopSylGTT00000023931 gene=OopSylGTG00000022654 name=actg1 seq_id=scaffold_3 type=cds	32	38	26	33	28	44	0	44	201	375
73	>OopSylGTT00000058881 gene=OopSylGTG00000055529 name=cfb seq_id=scaffold_8 type=cds	22	32	30	30	29	42	0	42	185	739
74	>OopSylGTT00000067803 gene=OopSylGTG00000063906 name=sipa1_2 seq_id=scaffold_10 type=cds	27	42	20	25	8	36	0	42	158	917
75	>OopSylGTT00000066738 gene=OopSylGTG00000062903 seq_id=scaffold_10 type=cds	34	7	42	6	26	7	0	42	122	1333
76	>OopSylGTT00000064196 gene=OopSylGTG00000060515 seq_id=scaffold_9 type=cds	20	10	30	18	41	13	0	41	132	588
77	>OopSylGTT00000032702 gene=OopSylGTG00000030842 name=a2ml1_6 seq_id=scaffold_3 type=cds	28	4	27	8	39	14	0	39	120	199
78	>OopSylGTT00000009257 gene=OopSylGTG00000008784 name=ighm_2 seq_id=scaffold_1 type=cds	30	6	37	15	32	13	0	37	133	445
79	>OopSylGTT00000004697 gene=OopSylGTG00000004454 name=serpina10 seq_id=scaffold_1 type=cds	29	24	36	25	25	30	0	36	169	492
80	>OopSylGTT00000047467 gene=OopSylGTG00000044797 name=hebp2_2 seq_id=scaffold_5 type=cds	15	24	14	21	36	33	0	36	143	216
81	>OopSylGTT00000054741 gene=OopSylGTG00000051709 name=fn1 seq_id=scaffold_7 type=cds	26	5	31	3	35	6	0	35	106	1370
82	>OopSylGTT00000031690 gene=OopSylGTG00000029896 name=sftpd_3 seq_id=scaffold_3 type=cds	20	17	10	16	34	19	0	34	116	278
83	>OopSylGTT00000019586 gene=OopSylGTG00000018528 name=svep1_6 seq_id=scaffold_2 type=cds	22	8	34	11	22	13	0	34	110	915
84	>OopSylGTT00000043857 gene=OopSylGTG00000041344 name=ahsg_2 seq_id=scaffold_5 type=cds	28	33	25	28	20	31	0	33	165	328
85	>OopSylGTT00000042694 gene=OopSylGTG00000040244 seq_id=scaffold_5 type=cds	20	16	19	15	33	11	0	33	114	286
86	>OopSylGTT00000060637 gene=OopSylGTG00000057184 name=c5 seq_id=scaffold_8 type=cds	28	5	33	9	22	5	0	33	102	775
87	>OopSylGTT00000071262 gene=OopSylGTG00000067236 name=ighv4-39_2 seq_id=scaffold_2012 type=cds	19	7	20	14	33	6	0	33	99	135
88	>OopSylGTT00000020786 gene=OopSylGTG00000019667 name=serpinf2 seq_id=scaffold_2 type=cds	18	13	24	10	32	22	0	32	119	389
89	>OopSylGTT00000040848 gene=OopSylGTG00000038505 name=c3_3 seq_id=scaffold_4 type=cds	27	9	31	7	31	11	0	31	116	402
90	>OopSylGTT00000037568 gene=OopSylGTG00000035429 name=itih2 seq_id=scaffold_4 type=cds	20	7	31	10	11	9	0	31	88	992
91	>OopSylGTT00000049535 gene=OopSylGTG00000046729 name=nrp1 seq_id=scaffold_6 type=cds	13	9	19	7	30	8	0	30	86	598
92	>OopSylGTT00000012859 gene=OopSylGTG00000012165 name=serpinf2_2 seq_id=scaffold_1 type=cds	24	6	29	15	20	8	0	29	102	518
93	>OopSylGTT00000040845 gene=OopSylGTG00000038502 seq_id=scaffold_4 type=cds	28	27	17	26	20	25	0	28	143	887
94	>OopSylGTT00000071347 gene=OopSylGTG00000067321 name=eno3 seq_id=scaffold_2145 type=cds	12	26	15	24	18	28	0	28	123	434
95	>OopSylGTT00000002398 gene=OopSylGTG00000002276 name=cfi seq_id=scaffold_1 type=cds	21	25	15	25	26	27	0	27	139	591
96	>OopSylGTT00000058911 gene=OopSylGTG00000055557 seq_id=scaffold_8 type=cds	22	11	27	15	18	18	0	27	111	133
97	>OopSylGTT00000057194 gene=OopSylGTG00000053959 name=trrap_2 seq_id=scaffold_7 type=cds	27	NaN	NaN	NaN	NaN	NaN	0	27	27	3835
98	>OopSylGTT00000020367 gene=OopSylGTG00000019276 name=f5 seq_id=scaffold_2 type=cds	25	8	25	4	11	6	0	25	79	1565
99	>OopSylGTT00000063984 gene=OopSylGTG00000060315 name=itih3_4 seq_id=scaffold_9 type=cds	24	6	25	4	14	6	0	25	79	623
100	>OopSylGTT00000059692 gene=OopSylGTG00000056280 seq_id=scaffold_8 type=cds	4	NaN	4	NaN	25	NaN	0	25	33	254
101	>OopSylGTT00000013274 gene=OopSylGTG00000012547 name=c7 seq_id=scaffold_1 type=cds	20	16	24	9	10	11	0	24	90	776
102	>OopSylGTT00000057754 gene=OopSylGTG00000054478 seq_id=scaffold_7 type=cds	13	2	7	4	24	4	0	24	54	142
103	>OopSylGTT00000009234 gene=OopSylGTG00000008763 seq_id=scaffold_1 type=cds	8	7	2	7	24	3	0	24	51	127
104	>OopSylGTT00000067236 gene=OopSylGTG00000063366 name=f2 seq_id=scaffold_10 type=cds	NaN	NaN	NaN	NaN	NaN	24	0	24	24	605
105	>OopSylGTT00000045625 gene=OopSylGTG00000043022 name=vnn1 seq_id=scaffold_5 type=cds	17	14	18	15	21	23	0	23	108	489
106	>OopSylGTT00000064193 gene=OopSylGTG00000060513 seq_id=scaffold_9 type=cds	17	8	23	13	19	13	0	23	93	594
107	>OopSylGTT00000042700 gene=OopSylGTG00000040248 seq_id=scaffold_5 type=cds	22	11	21	16	21	18	0	22	109	118
108	>OopSylGTT00000043248 gene=OopSylGTG00000040764 name=cp seq_id=scaffold_5 type=cds	11	22	11	11	15	20	0	22	90	163
109	>OopSylGTT00000043091 gene=OopSylGTG00000040612 name=proc seq_id=scaffold_5 type=cds	13	7	10	9	22	8	0	22	69	440
110	>OopSylGTT00000043238 gene=OopSylGTG00000040755 name=hephl1_2 seq_id=scaffold_5 type=cds	21	3	21	5	20	5	0	21	75	260
111	>OopSylGTT00000027637 gene=OopSylGTG00000026144 name=paox_2 seq_id=scaffold_3 type=cds	21	9	NaN	18	15	NaN	0	21	63	432
112	>OopSylGTT00000062643 gene=OopSylGTG00000059043 seq_id=scaffold_9 type=cds	17	8	5	3	21	7	0	21	61	110
113	>OopSylGTT00000027638 gene=OopSylGTG00000026144 name=paox_2 seq_id=scaffold_3 type=cds	NaN	NaN	21	NaN	NaN	13	0	21	34	508
114	>OopSylGTT00000007556 gene=OopSylGTG00000007156 name=ami seq_id=scaffold_1 type=cds	12	17	10	20	20	20	0	20	99	195
115	>OopSylGTT00000014875 gene=OopSylGTG00000014067 name=racgap1_2 seq_id=scaffold_2 type=cds	NaN	NaN	NaN	NaN	20	NaN	0	20	20	627
116	>OopSylGTT00000008869 gene=OopSylGTG00000008424 name=aldh1a1 seq_id=scaffold_1 type=cds	19	19	18	15	9	17	0	19	97	461
117	>OopSylGTT00000032696 gene=OopSylGTG00000030836 name=a2m_8 seq_id=scaffold_3 type=cds	15	10	19	7	17	9	0	19	77	279
118	>OopSylGTT00000003066 gene=OopSylGTG00000002922 name=alb_2 seq_id=scaffold_1 type=cds	4	12	4	18	4	19	0	19	61	133
119	>OopSylGTT00000000180 gene=OopSylGTG00000000173 name=igkv4-1_6 seq_id=scaffold_1 type=cds	11	2	7	NaN	19	1	0	19	40	100
120	>OopSylGTT00000046565 gene=OopSylGTG00000043941 seq_id=scaffold_5 type=cds	NaN	NaN	NaN	2	19	NaN	0	19	21	179
121	>OopSylGTT00000010418 gene=OopSylGTG00000009854 name=serpind1 seq_id=scaffold_1 type=cds	18	5	18	11	16	10	0	18	78	487
122	>OopSylGTT00000043861 gene=OopSylGTG00000041348 name=kng1 seq_id=scaffold_5 type=cds	17	6	12	8	18	4	0	18	65	367
123	>OopSylGTT00000033019 gene=OopSylGTG00000031142 seq_id=scaffold_3 type=cds	14	5	10	5	18	1	0	18	53	132
124	>OopSylGTT00000061037 gene=OopSylGTG00000057548 name=tubb4b seq_id=scaffold_8 type=cds	NaN	18	15	5	NaN	7	0	18	45	445
125	>OopSylGTT00000042666 gene=OopSylGTG00000040216 seq_id=scaffold_5 type=cds	6	8	17	10	16	8	0	17	65	352
126	>OopSylGTT00000003068 gene=OopSylGTG00000002924 name=alb_8 seq_id=scaffold_1 type=cds	4	11	6	15	7	17	0	17	60	328
127	>OopSylGTT00000013279 gene=OopSylGTG00000012552 name=c6 seq_id=scaffold_1 type=cds	13	3	16	10	14	8	0	16	64	468
128	>OopSylGTT00000066306 gene=OopSylGTG00000062497 name=cetp seq_id=scaffold_10 type=cds	14	4	16	4	13	8	0	16	59	492
129	>OopSylGTT00000007532 gene=OopSylGTG00000007134 name=crp seq_id=scaffold_1 type=cds	12	6	8	5	10	16	0	16	57	235
130	>OopSylGTT00000040978 gene=OopSylGTG00000038619 seq_id=scaffold_4 type=cds	12	6	16	4	13	5	0	16	56	456
131	>OopSylGTT00000000181 gene=OopSylGTG00000000174 name=igkv4-1_4 seq_id=scaffold_1 type=cds	12	3	7	7	16	4	0	16	49	117
132	>OopSylGTT00000065634 gene=OopSylGTG00000061847 name=vacwr025_cr1 seq_id=scaffold_9 type=cds	12	NaN	12	3	16	4	0	16	47	198
133	>OopSylGTT00000037067 gene=OopSylGTG00000034956 name=tubgcp6 seq_id=scaffold_4 type=cds	NaN	NaN	NaN	NaN	16	1	0	16	17	518
134	>OopSylGTT00000067399 gene=OopSylGTG00000063516 name=cat_2 seq_id=scaffold_10 type=cds	15	15	8	14	10	6	0	15	68	528
135	>OopSylGTT00000066552 gene=OopSylGTG00000062729 name=urah seq_id=scaffold_10 type=cds	5	3	4	7	15	7	0	15	41	134
136	>OopSylGTT00000004677 gene=OopSylGTG00000004441 name=serpina1 seq_id=scaffold_1 type=cds	13	15	NaN	NaN	NaN	NaN	0	15	28	414
137	>OopSylGTT00000040904 gene=OopSylGTG00000038557 name=tubb4b_2 seq_id=scaffold_4 type=cds	15	NaN	NaN	NaN	NaN	NaN	0	15	15	414
138	>OopSylGTT00000043876 gene=OopSylGTG00000041363 name=kng2 seq_id=scaffold_5 type=cds	7	9	10	14	6	12	0	14	58	251
139	>OopSylGTT00000020785 gene=OopSylGTG00000019666 name=serpinf1 seq_id=scaffold_2 type=cds	7	8	7	9	12	14	0	14	57	410
140	>OopSylGTT00000042698 gene=OopSylGTG00000040247 seq_id=scaffold_5 type=cds	14	4	14	7	1	5	0	14	45	138
141	>OopSylGTT00000000177 gene=OopSylGTG00000000170 name=igkv3-20_2 seq_id=scaffold_1 type=cds	14	4	9	2	5	4	0	14	38	119
142	>OopSylGTT00000016472 gene=OopSylGTG00000015583 name=f10_3 seq_id=scaffold_2 type=cds	5	4	11	2	14	2	0	14	38	519
143	>OopSylGTT00000040843 gene=OopSylGTG00000038500 seq_id=scaffold_4 type=cds	7	1	8	4	14	NaN	0	14	34	214
144	>OopSylGTT00000033974 gene=OopSylGTG00000032013 name=etfbkmt seq_id=scaffold_4 type=cds	NaN	NaN	NaN	NaN	14	NaN	0	14	14	279
145	>OopSylGTT00000065681 gene=OopSylGTG00000061893 name=cfh seq_id=scaffold_9 type=cds	12	7	13	7	9	5	0	13	53	319
146	>OopSylGTT00000028588 gene=OopSylGTG00000027055 name=crim1 seq_id=scaffold_3 type=cds	2	8	1	13	5	7	0	13	36	186
147	>OopSylGTT00000029073 gene=OopSylGTG00000027511 name=apoa4 seq_id=scaffold_3 type=cds	3	13	NaN	10	NaN	3	0	13	29	367
148	>OopSylGTT00000000619 gene=OopSylGTG00000000584 name=vim seq_id=scaffold_1 type=cds	3	NaN	NaN	6	13	NaN	0	13	22	341
149	>OopSylGTT00000032684 gene=OopSylGTG00000030824 name=a2ml1_9 seq_id=scaffold_3 type=cds	11	10	12	6	8	6	0	12	53	1220
150	>OopSylGTT00000066739 gene=OopSylGTG00000062903 seq_id=scaffold_10 type=cds	6	3	11	5	12	5	0	12	42	147
151	>OopSylGTT00000015684 gene=OopSylGTG00000014843 name=tuba seq_id=scaffold_2 type=cds	10	NaN	12	5	4	9	0	12	40	449
152	>OopSylGTT00000052946 gene=OopSylGTG00000049998 name=chd7 seq_id=scaffold_6 type=cds	NaN	NaN	7	7	12	NaN	0	12	26	2179
153	>OopSylGTT00000062763 gene=OopSylGTG00000059159 name=itih3_8 seq_id=scaffold_9 type=cds	5	NaN	12	NaN	5	4	0	12	26	683
154	>OopSylGTT00000031569 gene=OopSylGTG00000029781 name=polr3a seq_id=scaffold_3 type=cds	12	NaN	11	2	NaN	NaN	0	12	25	742
155	>OopSylGTT00000061264 gene=OopSylGTG00000057747 name=fcn2_2 seq_id=scaffold_8 type=cds	5	7	7	11	8	10	0	11	48	172
156	>OopSylGTT00000072023 gene=OopSylGTG00000067992 seq_id=scaffold_3815 type=cds	10	NaN	11	7	NaN	NaN	0	11	28	113
157	>OopSylGTT00000000176 gene=OopSylGTG00000000169 name=igkv3-20_4 seq_id=scaffold_1 type=cds	5	NaN	2	NaN	11	NaN	0	11	18	121
158	>OopSylGTT00000015277 gene=OopSylGTG00000014455 name=marchf9_2 seq_id=scaffold_2 type=cds	NaN	NaN	NaN	NaN	11	NaN	0	11	11	331
159	>OopSylGTT00000034548 gene=OopSylGTG00000032547 name=gpx3 seq_id=scaffold_4 type=cds	10	NaN	5	2	8	NaN	0	10	25	157
160	>OopSylGTT00000044543 gene=OopSylGTG00000041992 seq_id=scaffold_5 type=cds	10	NaN	2	1	7	NaN	0	10	20	228
161	>OopSylGTT00000045894 gene=OopSylGTG00000043284 name=hivep2 seq_id=scaffold_5 type=cds	NaN	NaN	10	7	NaN	NaN	0	10	17	2264
162	>OopSylGTT00000009229 gene=OopSylGTG00000008759 seq_id=scaffold_1 type=cds	NaN	NaN	10	NaN	4	NaN	0	10	14	125
163	>OopSylGTT00000060942 gene=OopSylGTG00000057459 name=c8g_2 seq_id=scaffold_8 type=cds	1	NaN	1	NaN	10	2	0	10	14	207
164	>OopSylGTT00000007180 gene=OopSylGTG00000006791 seq_id=scaffold_1 type=cds	NaN	NaN	10	NaN	NaN	NaN	0	10	10	257
165	>OopSylGTT00000040899 gene=OopSylGTG00000038552 name=c3_5 seq_id=scaffold_4 type=cds	NaN	10	NaN	NaN	NaN	NaN	0	10	10	102
166	>OopSylGTT00000055564 gene=OopSylGTG00000052490 name=tuba1d seq_id=scaffold_7 type=cds	NaN	10	NaN	NaN	NaN	NaN	0	10	10	525
167	>OopSylGTT00000016469 gene=OopSylGTG00000015580 name=f7 seq_id=scaffold_2 type=cds	4	9	3	7	3	7	0	9	33	323
168	>OopSylGTT00000028825 gene=OopSylGTG00000027277 name=crp_ca6 seq_id=scaffold_3 type=cds	6	6	4	5	3	9	0	9	33	527
169	>OopSylGTT00000047380 gene=OopSylGTG00000044723 name=apmap seq_id=scaffold_5 type=cds	9	7	NaN	6	4	7	0	9	33	183
170	>OopSylGTT00000012143 gene=OopSylGTG00000011482 name=bhmt_2 seq_id=scaffold_1 type=cds	9	4	8	8	NaN	2	0	9	31	162
171	>OopSylGTT00000000191 gene=OopSylGTG00000000184 name=igkv3-15_3 seq_id=scaffold_1 type=cds	9	NaN	6	3	6	5	0	9	29	116
172	>OopSylGTT00000010381 gene=OopSylGTG00000009819 name=iglv5-52_2 seq_id=scaffold_1 type=cds	9	1	4	1	9	5	0	9	29	113
173	>OopSylGTT00000032911 gene=OopSylGTG00000031036 name=got1 seq_id=scaffold_3 type=cds	3	9	5	4	4	4	0	9	29	413
174	>OopSylGTT00000010039 gene=OopSylGTG00000009498 name=rdh12 seq_id=scaffold_1 type=cds	4	9	NaN	8	NaN	NaN	0	9	21	320
175	>OopSylGTT00000020741 gene=OopSylGTG00000019625 name=vtn_2 seq_id=scaffold_2 type=cds	NaN	NaN	NaN	5	9	7	0	9	21	431
176	>OopSylGTT00000034343 gene=OopSylGTG00000032356 name=ldhb_2 seq_id=scaffold_4 type=cds	9	NaN	3	NaN	3	6	0	9	21	312
177	>OopSylGTT00000025792 gene=OopSylGTG00000024404 name=myh7b seq_id=scaffold_3 type=cds	9	NaN	NaN	2	NaN	8	0	9	19	1935
178	>OopSylGTT00000065198 gene=OopSylGTG00000061428 seq_id=scaffold_9 type=cds	5	NaN	9	NaN	5	NaN	0	9	19	896
179	>OopSylGTT00000009228 gene=OopSylGTG00000008759 seq_id=scaffold_1 type=cds	1	1	4	1	9	2	0	9	18	125
180	>OopSylGTT00000042362 gene=OopSylGTG00000039925 name=ywhaq seq_id=scaffold_5 type=cds	2	NaN	2	NaN	9	NaN	0	9	13	248
181	>OopSylGTT00000060640 gene=OopSylGTG00000057185 name=c5_2 seq_id=scaffold_8 type=cds	NaN	NaN	NaN	NaN	9	3	0	9	12	108
182	>OopSylGTT00000001147 gene=OopSylGTG00000001088 seq_id=scaffold_1 type=cds	NaN	9	NaN	NaN	NaN	NaN	0	9	9	105
183	>OopSylGTT00000067794 gene=OopSylGTG00000063898 name=pygm seq_id=scaffold_10 type=cds	5	NaN	6	6	NaN	8	0	8	25	843
184	>OopSylGTT00000007182 gene=OopSylGTG00000006793 name=pkm seq_id=scaffold_1 type=cds	2	5	2	1	8	6	0	8	24	545
185	>OopSylGTT00000033105 gene=OopSylGTG00000031217 name=gapdh seq_id=scaffold_3 type=cds	8	NaN	3	5	6	NaN	0	8	22	120
186	>OopSylGTT00000034233 gene=OopSylGTG00000032252 name=vwf_3 seq_id=scaffold_4 type=cds	3	NaN	8	NaN	NaN	4	0	8	15	1082
187	>OopSylGTT00000005203 gene=OopSylGTG00000004914 name=ktn1_2 seq_id=scaffold_1 type=cds	NaN	NaN	8	5	NaN	NaN	0	8	13	1113
188	>OopSylGTT00000057213 gene=OopSylGTG00000053975 seq_id=scaffold_7 type=cds	8	NaN	NaN	NaN	3	NaN	0	8	11	109
189	>OopSylGTT00000032654 gene=OopSylGTG00000030796 name=a2m_7 seq_id=scaffold_3 type=cds	NaN	1	NaN	NaN	8	NaN	0	8	9	123
190	>OopSylGTT00000055225 gene=OopSylGTG00000052170 name=fign seq_id=scaffold_7 type=cds	8	NaN	NaN	NaN	NaN	NaN	0	8	8	709
191	>OopSylGTT00000029286 gene=OopSylGTG00000027701 name=masp2_masp1 seq_id=scaffold_3 type=cds	6	2	5	3	5	7	0	7	28	687
192	>OopSylGTT00000020362 gene=OopSylGTG00000019271 name=f5_2 seq_id=scaffold_2 type=cds	4	4	5	3	7	3	0	7	26	322
193	>OopSylGTT00000040850 gene=OopSylGTG00000038507 name=c3_13 seq_id=scaffold_4 type=cds	7	2	6	4	5	2	0	7	26	224
194	>OopSylGTT00000019637 gene=OopSylGTG00000018579 name=pigr_2 seq_id=scaffold_2 type=cds	1	5	NaN	6	5	7	0	7	24	603
195	>OopSylGTT00000019595 gene=OopSylGTG00000018537 name=cr1 seq_id=scaffold_2 type=cds	2	1	4	2	7	1	0	7	17	213
196	>OopSylGTT00000040088 gene=OopSylGTG00000037795 name=cyp1 seq_id=scaffold_4 type=cds	5	NaN	5	NaN	7	NaN	0	7	17	164
197	>OopSylGTT00000070432 gene=OopSylGTG00000066424 seq_id=scaffold_859 type=cds	6	NaN	7	NaN	3	NaN	0	7	16	228
198	>OopSylGTT00000000183 gene=OopSylGTG00000000176 name=igkv4-1_3 seq_id=scaffold_1 type=cds	3	2	NaN	1	7	1	0	7	14	120
199	>OopSylGTT00000038157 gene=OopSylGTG00000035979 name=pkm_3 seq_id=scaffold_4 type=cds	3	NaN	4	7	NaN	NaN	0	7	14	161
200	>OopSylGTT00000017705 gene=OopSylGTG00000016740 name=fabp1 seq_id=scaffold_2 type=cds	5	NaN	NaN	NaN	7	1	0	7	13	126
201	>OopSylGTT00000073239 gene=OopSylGTG00000069205 seq_id=scaffold_10359 type=cds	6	NaN	NaN	NaN	7	NaN	0	7	13	155
202	>OopSylGTT00000029434 gene=OopSylGTG00000027833 name=hspa8_3 seq_id=scaffold_3 type=cds	NaN	NaN	7	NaN	5	NaN	0	7	12	591
203	>OopSylGTT00000000179 gene=OopSylGTG00000000172 name=igkv4-1_5 seq_id=scaffold_1 type=cds	7	NaN	1	NaN	2	NaN	0	7	10	150
204	>OopSylGTT00000003151 gene=OopSylGTG00000003003 name=rufy3 seq_id=scaffold_1 type=cds	NaN	NaN	7	NaN	NaN	NaN	0	7	7	610
205	>OopSylGTT00000017793 gene=OopSylGTG00000016818 name=mfsd2a seq_id=scaffold_2 type=cds	7	NaN	NaN	NaN	NaN	NaN	0	7	7	517
206	>OopSylGTT00000022487 gene=OopSylGTG00000021255 name=myh13_2 seq_id=scaffold_3 type=cds	NaN	NaN	7	NaN	NaN	NaN	0	7	7	1368
207	>OopSylGTT00000004676 gene=OopSylGTG00000004440 name=serpina3k seq_id=scaffold_1 type=cds	6	5	5	6	6	5	0	6	33	111
208	>OopSylGTT00000072735 gene=OopSylGTG00000068704 name=ighv4-39 seq_id=scaffold_7024 type=cds	5	2	3	3	6	6	0	6	25	108
209	>OopSylGTT00000063071 gene=OopSylGTG00000059461 name=aldh9a1_2 seq_id=scaffold_9 type=cds	3	4	4	6	4	2	0	6	23	109
210	>OopSylGTT00000060608 gene=OopSylGTG00000057159 name=gsn_2 seq_id=scaffold_8 type=cds	4	NaN	6	4	6	2	0	6	22	730
211	>OopSylGTT00000032570 gene=OopSylGTG00000030719 name=pzp seq_id=scaffold_3 type=cds	6	NaN	6	NaN	6	3	0	6	21	281
212	>OopSylGTT00000031674 gene=OopSylGTG00000029880 name=sftpd_2 seq_id=scaffold_3 type=cds	6	2	2	4	6	NaN	0	6	20	152
213	>OopSylGTT00000019485 gene=OopSylGTG00000018433 name=gstm4_2 seq_id=scaffold_2 type=cds	6	NaN	6	NaN	6	NaN	0	6	18	217
214	>OopSylGTT00000032655 gene=OopSylGTG00000030796 name=a2m_7 seq_id=scaffold_3 type=cds	2	2	4	2	6	2	0	6	18	303
215	>OopSylGTT00000020740 gene=OopSylGTG00000019624 name=vtn seq_id=scaffold_2 type=cds	4	6	5	NaN	NaN	NaN	0	6	15	367
216	>OopSylGTT00000058891 gene=OopSylGTG00000055537 name=c2 seq_id=scaffold_8 type=cds	1	2	6	NaN	4	2	0	6	15	757
217	>OopSylGTT00000071634 gene=OopSylGTG00000067607 name=iglv7-43 seq_id=scaffold_2727 type=cds	4	1	2	1	6	1	0	6	15	118
218	>OopSylGTT00000032046 gene=OopSylGTG00000030229 name=minpp1_2 seq_id=scaffold_3 type=cds	NaN	6	1	3	1	3	0	6	14	296
219	>OopSylGTT00000027107 gene=OopSylGTG00000025640 seq_id=scaffold_3 type=cds	4	NaN	3	NaN	6	NaN	0	6	13	210
220	>OopSylGTT00000047876 gene=OopSylGTG00000045183 name=mdh1 seq_id=scaffold_5 type=cds	4	NaN	3	NaN	6	NaN	0	6	13	334
221	>OopSylGTT00000065529 gene=OopSylGTG00000061743 name=f13b_2 seq_id=scaffold_9 type=cds	3	2	6	2	NaN	NaN	0	6	13	294
222	>OopSylGTT00000036258 gene=OopSylGTG00000034183 name=lta4h_3 seq_id=scaffold_4 type=cds	5	NaN	NaN	NaN	6	NaN	0	6	11	273
223	>OopSylGTT00000060956 gene=OopSylGTG00000057472 name=ambp seq_id=scaffold_8 type=cds	4	NaN	NaN	NaN	6	NaN	0	6	10	343
224	>OopSylGTT00000008743 gene=OopSylGTG00000008302 name=kank1 seq_id=scaffold_1 type=cds	NaN	NaN	NaN	6	NaN	3	0	6	9	587
225	>OopSylGTT00000025167 gene=OopSylGTG00000023824 seq_id=scaffold_3 type=cds	NaN	NaN	1	NaN	6	2	0	6	9	462
226	>OopSylGTT00000061763 gene=OopSylGTG00000058197 name=l1cam seq_id=scaffold_8 type=cds	NaN	2	6	NaN	NaN	1	0	6	9	396
227	>OopSylGTT00000000188 gene=OopSylGTG00000000181 name=igkv4-1_2 seq_id=scaffold_1 type=cds	2	NaN	NaN	NaN	6	NaN	0	6	8	112
228	>OopSylGTT00000005607 gene=OopSylGTG00000005305 name=klc1 seq_id=scaffold_1 type=cds	NaN	NaN	6	NaN	NaN	NaN	0	6	6	563
229	>OopSylGTT00000029435 gene=OopSylGTG00000027833 name=hspa8_3 seq_id=scaffold_3 type=cds	6	NaN	NaN	NaN	NaN	NaN	0	6	6	646
230	>OopSylGTT00000032039 gene=OopSylGTG00000030222 name=atad1 seq_id=scaffold_3 type=cds	NaN	NaN	NaN	6	NaN	NaN	0	6	6	361
231	>OopSylGTT00000049325 gene=OopSylGTG00000046526 name=vim1 seq_id=scaffold_6 type=cds	NaN	NaN	NaN	NaN	NaN	6	0	6	6	466
232	>OopSylGTT00000071179 gene=OopSylGTG00000067154 seq_id=scaffold_1889 type=cds	NaN	NaN	NaN	NaN	NaN	6	0	6	6	414
233	>OopSylGTT00000059896 gene=OopSylGTG00000056476 name=pgk seq_id=scaffold_8 type=cds	5	5	4	1	NaN	5	0	5	20	212
234	>OopSylGTT00000063086 gene=OopSylGTG00000059473 name=aldh9a1 seq_id=scaffold_9 type=cds	3	5	NaN	4	3	2	0	5	17	202
235	>OopSylGTT00000009232 gene=OopSylGTG00000008761 seq_id=scaffold_1 type=cds	1	5	2	NaN	3	5	0	5	16	113
236	>OopSylGTT00000071716 gene=OopSylGTG00000067689 name=iglv5-37 seq_id=scaffold_2946 type=cds	4	1	2	2	5	2	0	5	16	130
237	>OopSylGTT00000060639 gene=OopSylGTG00000057185 name=c5_2 seq_id=scaffold_8 type=cds	5	3	4	3	NaN	NaN	0	5	15	124
238	>OopSylGTT00000061761 gene=OopSylGTG00000058196 name=l1cam_2 seq_id=scaffold_8 type=cds	4	NaN	4	NaN	5	NaN	0	5	13	427
239	>OopSylGTT00000071628 gene=OopSylGTG00000067601 name=pced1a_2 seq_id=scaffold_2716 type=cds	2	1	NaN	2	5	3	0	5	13	333
240	>OopSylGTT00000002653 gene=OopSylGTG00000002521 seq_id=scaffold_1 type=cds	3	NaN	3	5	1	NaN	0	5	12	128
241	>OopSylGTT00000002709 gene=OopSylGTG00000002575 name=adh1_2 seq_id=scaffold_1 type=cds	5	2	2	1	1	1	0	5	12	379
242	>OopSylGTT00000054715 gene=OopSylGTG00000051684 seq_id=scaffold_7 type=cds	5	NaN	3	NaN	4	NaN	0	5	12	892
243	>OopSylGTT00000056401 gene=OopSylGTG00000053242 name=igfals seq_id=scaffold_7 type=cds	5	1	4	1	1	NaN	0	5	12	611
244	>OopSylGTT00000063208 gene=OopSylGTG00000059590 name=tkt_2 seq_id=scaffold_9 type=cds	4	NaN	5	2	1	NaN	0	5	12	479
245	>OopSylGTT00000006073 gene=OopSylGTG00000005745 name=actc1 seq_id=scaffold_1 type=cds	2	NaN	NaN	3	1	5	0	5	11	377
246	>OopSylGTT00000044738 gene=OopSylGTG00000042179 name=eef1as_4 seq_id=scaffold_5 type=cds	3	NaN	5	NaN	3	NaN	0	5	11	462
247	>OopSylGTT00000067587 gene=OopSylGTG00000063698 name=ldha seq_id=scaffold_10 type=cds	5	NaN	1	NaN	4	1	0	5	11	332
248	>OopSylGTT00000015562 gene=OopSylGTG00000014725 name=pmel seq_id=scaffold_2 type=cds	5	NaN	2	NaN	3	NaN	0	5	10	702
249	>OopSylGTT00000062743 gene=OopSylGTG00000059139 name=itih3_5 seq_id=scaffold_9 type=cds	2	NaN	5	NaN	3	NaN	0	5	10	248
250	>OopSylGTT00000043757 gene=OopSylGTG00000041249 name=serpini1 seq_id=scaffold_5 type=cds	NaN	4	NaN	NaN	NaN	5	0	5	9	410
251	>OopSylGTT00000007015 gene=OopSylGTG00000006632 name=eef2 seq_id=scaffold_1 type=cds	5	NaN	3	NaN	NaN	NaN	0	5	8	858
252	>OopSylGTT00000035417 gene=OopSylGTG00000033381 name=f12 seq_id=scaffold_4 type=cds	5	NaN	3	NaN	NaN	NaN	0	5	8	180
253	>OopSylGTT00000052141 gene=OopSylGTG00000049238 name=gpld1_2 seq_id=scaffold_6 type=cds	5	NaN	2	NaN	1	NaN	0	5	8	567
254	>OopSylGTT00000029698 gene=OopSylGTG00000028069 name=c1qa seq_id=scaffold_3 type=cds	5	NaN	NaN	NaN	1	NaN	0	5	6	243
255	>OopSylGTT00000015106 gene=OopSylGTG00000014289 name=smug1 seq_id=scaffold_2 type=cds	NaN	NaN	5	NaN	NaN	NaN	0	5	5	262
256	>OopSylGTT00000022105 gene=OopSylGTG00000020897 name=stxbp5l seq_id=scaffold_2 type=cds	NaN	NaN	5	NaN	NaN	NaN	0	5	5	544
257	>OopSylGTT00000028285 gene=OopSylGTG00000026768 name=treh seq_id=scaffold_3 type=cds	NaN	NaN	NaN	NaN	5	NaN	0	5	5	389
258	>OopSylGTT00000032829 gene=OopSylGTG00000030960 name=dock1_3 seq_id=scaffold_3 type=cds	NaN	NaN	NaN	5	NaN	NaN	0	5	5	291
259	>OopSylGTT00000056709 gene=OopSylGTG00000053529 name=tsc2_2 seq_id=scaffold_7 type=cds	5	NaN	NaN	NaN	NaN	NaN	0	5	5	1755
260	>OopSylGTT00000071386 gene=OopSylGTG00000067360 name=pecam1 seq_id=scaffold_2216 type=cds	NaN	NaN	5	NaN	NaN	NaN	0	5	5	556
261	>OopSylGTT00000042628 gene=OopSylGTG00000040180 name=tf-b seq_id=scaffold_5 type=cds	2	2	4	2	4	1	0	4	15	430
262	>OopSylGTT00000000773 gene=OopSylGTG00000000732 name=sod3_3 seq_id=scaffold_1 type=cds	3	2	NaN	4	3	2	0	4	14	259
263	>OopSylGTT00000061110 gene=OopSylGTG00000057615 name=cfp seq_id=scaffold_8 type=cds	1	NaN	2	4	3	4	0	4	14	403
264	>OopSylGTT00000020682 gene=OopSylGTG00000019572 seq_id=scaffold_2 type=cds	4	NaN	3	NaN	3	3	0	4	13	254
265	>OopSylGTT00000031649 gene=OopSylGTG00000029859 seq_id=scaffold_3 type=cds	2	4	1	2	1	3	0	4	13	182
266	>OopSylGTT00000073499 gene=OopSylGTG00000069462 name=c3_15 seq_id=scaffold_13162 type=cds	4	NaN	4	1	2	1	0	4	12	135
267	>OopSylGTT00000002728 gene=OopSylGTG00000002593 seq_id=scaffold_1 type=cds	2	NaN	4	2	NaN	3	0	4	11	286
268	>OopSylGTT00000021297 gene=OopSylGTG00000020142 name=pros1 seq_id=scaffold_2 type=cds	4	NaN	3	NaN	3	NaN	0	4	10	370
269	>OopSylGTT00000047464 gene=OopSylGTG00000044794 name=hebp2 seq_id=scaffold_5 type=cds	2	4	1	2	NaN	1	0	4	10	216
270	>OopSylGTT00000059508 gene=OopSylGTG00000056109 name=blvrb seq_id=scaffold_8 type=cds	3	NaN	4	NaN	3	NaN	0	4	10	180
271	>OopSylGTT00000019597 gene=OopSylGTG00000018539 name=svep1_4 seq_id=scaffold_2 type=cds	NaN	NaN	4	NaN	4	1	0	4	9	303
272	>OopSylGTT00000068268 gene=OopSylGTG00000064337 name=plcb3_2 seq_id=scaffold_10 type=cds	NaN	2	NaN	3	NaN	4	0	4	9	1241
273	>OopSylGTT00000071362 gene=OopSylGTG00000067336 seq_id=scaffold_2177 type=cds	3	NaN	4	NaN	2	NaN	0	4	9	121
274	>OopSylGTT00000025870 gene=OopSylGTG00000024481 name=pltp seq_id=scaffold_3 type=cds	2	NaN	4	NaN	2	NaN	0	4	8	536
275	>OopSylGTT00000036256 gene=OopSylGTG00000034181 name=lta4h_2 seq_id=scaffold_4 type=cds	1	1	2	4	NaN	NaN	0	4	8	312
276	>OopSylGTT00000061525 gene=OopSylGTG00000057975 name=ak5 seq_id=scaffold_8 type=cds	NaN	NaN	2	NaN	2	4	0	4	8	531
277	>OopSylGTT00000002821 gene=OopSylGTG00000002683 seq_id=scaffold_1 type=cds	2	NaN	NaN	1	4	NaN	0	4	7	475
278	>OopSylGTT00000032852 gene=OopSylGTG00000030983 name=dhx32_3 seq_id=scaffold_3 type=cds	NaN	3	NaN	NaN	NaN	4	0	4	7	347
279	>OopSylGTT00000033385 gene=OopSylGTG00000031477 seq_id=scaffold_3 type=cds	NaN	2	NaN	1	NaN	4	0	4	7	249
280	>OopSylGTT00000040842 gene=OopSylGTG00000038499 name=c3 seq_id=scaffold_4 type=cds	3	NaN	NaN	NaN	4	NaN	0	4	7	148
281	>OopSylGTT00000001671 gene=OopSylGTG00000001592 name=aadat seq_id=scaffold_1 type=cds	2	NaN	4	NaN	NaN	NaN	0	4	6	300
282	>OopSylGTT00000021841 gene=OopSylGTG00000020639 seq_id=scaffold_2 type=cds	2	NaN	NaN	NaN	4	NaN	0	4	6	103
283	>OopSylGTT00000043965 gene=OopSylGTG00000041448 seq_id=scaffold_5 type=cds	NaN	NaN	4	2	NaN	NaN	0	4	6	539
284	>OopSylGTT00000061221 gene=OopSylGTG00000057714 name=gdi1 seq_id=scaffold_8 type=cds	NaN	NaN	1	4	NaN	1	0	4	6	466
285	>OopSylGTT00000020684 gene=OopSylGTG00000019574 seq_id=scaffold_2 type=cds	4	NaN	1	NaN	NaN	NaN	0	4	5	231
286	>OopSylGTT00000000173 gene=OopSylGTG00000000166 name=igkv3-20_3 seq_id=scaffold_1 type=cds	NaN	NaN	NaN	NaN	4	NaN	0	4	4	111
287	>OopSylGTT00000010396 gene=OopSylGTG00000009834 name=ess2 seq_id=scaffold_1 type=cds	4	NaN	NaN	NaN	NaN	NaN	0	4	4	532
288	>OopSylGTT00000014885 gene=OopSylGTG00000014077 name=krt5_2 seq_id=scaffold_2 type=cds	NaN	NaN	NaN	4	NaN	NaN	0	4	4	563
289	>OopSylGTT00000027690 gene=OopSylGTG00000026196 name=vcl seq_id=scaffold_3 type=cds	4	NaN	NaN	NaN	NaN	NaN	0	4	4	837
290	>OopSylGTT00000063039 gene=OopSylGTG00000059431 name=scyl3 seq_id=scaffold_9 type=cds	4	NaN	NaN	NaN	NaN	NaN	0	4	4	514
291	>OopSylGTT00000065104 gene=OopSylGTG00000061341 name=sojo_2 seq_id=scaffold_9 type=cds	NaN	NaN	4	NaN	NaN	NaN	0	4	4	1323
292	>OopSylGTT00000068225 gene=OopSylGTG00000064297 name=act3 seq_id=scaffold_10 type=cds	NaN	4	NaN	NaN	NaN	NaN	0	4	4	393
293	>OopSylGTT00000072044 gene=OopSylGTG00000068013 seq_id=scaffold_3870 type=cds	NaN	NaN	NaN	4	NaN	NaN	0	4	4	720
294	>OopSylGTT00000014888 gene=OopSylGTG00000014079 name=krt5 seq_id=scaffold_2 type=cds	1	2	3	3	3	3	0	3	15	636
295	>OopSylGTT00000002652 gene=OopSylGTG00000002521 seq_id=scaffold_1 type=cds	2	2	1	3	2	1	0	3	11	230
296	>OopSylGTT00000040936 gene=OopSylGTG00000038579 name=c3_4 seq_id=scaffold_4 type=cds	NaN	3	NaN	2	1	3	0	3	9	458
297	>OopSylGTT00000073198 gene=OopSylGTG00000069164 name=cd163 seq_id=scaffold_9936 type=cds	1	1	3	1	3	NaN	0	3	9	193
298	>OopSylGTT00000029074 gene=OopSylGTG00000027512 seq_id=scaffold_3 type=cds	2	2	1	NaN	NaN	3	0	3	8	155
299	>OopSylGTT00000000178 gene=OopSylGTG00000000171 name=igkv6d-41_2 seq_id=scaffold_1 type=cds	3	1	1	1	NaN	1	0	3	7	114
300	>OopSylGTT00000008733 gene=OopSylGTG00000008293 name=kank1_2 seq_id=scaffold_1 type=cds	NaN	2	NaN	2	NaN	3	0	3	7	558
301	>OopSylGTT00000025866 gene=OopSylGTG00000024477 name=ctsa_4 seq_id=scaffold_3 type=cds	2	NaN	NaN	NaN	3	2	0	3	7	128
302	>OopSylGTT00000061762 gene=OopSylGTG00000058197 name=l1cam seq_id=scaffold_8 type=cds	3	NaN	NaN	2	2	NaN	0	3	7	353
303	>OopSylGTT00000033071 gene=OopSylGTG00000031189 name=tpi1 seq_id=scaffold_3 type=cds	2	NaN	1	NaN	3	NaN	0	3	6	170
304	>OopSylGTT00000001158 gene=OopSylGTG00000001099 name=crad_2 seq_id=scaffold_1 type=cds	2	NaN	NaN	3	NaN	NaN	0	3	5	593
305	>OopSylGTT00000053718 gene=OopSylGTG00000050719 name=enpp2 seq_id=scaffold_6 type=cds	2	NaN	3	NaN	NaN	NaN	0	3	5	750
306	>OopSylGTT00000054738 gene=OopSylGTG00000051706 name=fn1_2 seq_id=scaffold_7 type=cds	1	NaN	1	NaN	3	NaN	0	3	5	163
307	>OopSylGTT00000061219 gene=OopSylGTG00000057712 name=fcn1-b seq_id=scaffold_8 type=cds	NaN	NaN	NaN	NaN	3	2	0	3	5	426
308	>OopSylGTT00000069828 gene=OopSylGTG00000065838 name=nnmt_13 seq_id=scaffold_386 type=cds	NaN	NaN	3	NaN	2	NaN	0	3	5	262
309	>OopSylGTT00000029703 gene=OopSylGTG00000028073 name=c1qc seq_id=scaffold_3 type=cds	NaN	NaN	NaN	NaN	3	1	0	3	4	237
310	>OopSylGTT00000056159 gene=OopSylGTG00000053039 name=b2m_2 seq_id=scaffold_7 type=cds	NaN	1	NaN	NaN	3	NaN	0	3	4	126
311	>OopSylGTT00000059003 gene=OopSylGTG00000055641 name=tubb seq_id=scaffold_8 type=cds	NaN	NaN	3	NaN	1	NaN	0	3	4	444
312	>OopSylGTT00000060800 gene=OopSylGTG00000057331 name=nup214_2 seq_id=scaffold_8 type=cds	NaN	1	NaN	NaN	3	NaN	0	3	4	548
313	>OopSylGTT00000073092 gene=OopSylGTG00000069059 name=nmral1_2 seq_id=scaffold_9204 type=cds	1	NaN	NaN	NaN	3	NaN	0	3	4	289
314	>OopSylGTT00000000190 gene=OopSylGTG00000000183 name=igkv3-15 seq_id=scaffold_1 type=cds	NaN	3	NaN	NaN	NaN	NaN	0	3	3	111
315	>OopSylGTT00000014186 gene=OopSylGTG00000013408 name=cul5 seq_id=scaffold_2 type=cds	NaN	NaN	NaN	3	NaN	NaN	0	3	3	520
316	>OopSylGTT00000020563 gene=OopSylGTG00000019465 name=prdx4 seq_id=scaffold_2 type=cds	NaN	NaN	NaN	NaN	3	NaN	0	3	3	273
317	>OopSylGTT00000021584 gene=OopSylGTG00000020401 name=cbr1 seq_id=scaffold_2 type=cds	NaN	NaN	NaN	NaN	3	NaN	0	3	3	312
318	>OopSylGTT00000021642 gene=OopSylGTG00000020456 name=erg_2 seq_id=scaffold_2 type=cds	NaN	3	NaN	NaN	NaN	NaN	0	3	3	461
319	>OopSylGTT00000025161 gene=OopSylGTG00000023820 name=krt12_2 seq_id=scaffold_3 type=cds	3	NaN	NaN	NaN	NaN	NaN	0	3	3	503
320	>OopSylGTT00000026417 gene=OopSylGTG00000024999 name=plekhg4b seq_id=scaffold_3 type=cds	3	NaN	NaN	NaN	NaN	NaN	0	3	3	381
321	>OopSylGTT00000026449 gene=OopSylGTG00000025027 seq_id=scaffold_3 type=cds	NaN	NaN	NaN	3	NaN	NaN	0	3	3	145
322	>OopSylGTT00000036035 gene=OopSylGTG00000033972 name=hsp90b1 seq_id=scaffold_4 type=cds	3	NaN	NaN	NaN	NaN	NaN	0	3	3	806
323	>OopSylGTT00000048437 gene=OopSylGTG00000045708 name=capn3 seq_id=scaffold_5 type=cds	NaN	NaN	NaN	3	NaN	NaN	0	3	3	253
324	>OopSylGTT00000049738 gene=OopSylGTG00000046923 name=rheb seq_id=scaffold_6 type=cds	NaN	NaN	3	NaN	NaN	NaN	0	3	3	169
325	>OopSylGTT00000050962 gene=OopSylGTG00000048100 name=mlh1_3 seq_id=scaffold_6 type=cds	NaN	NaN	NaN	3	NaN	NaN	0	3	3	245
326	>OopSylGTT00000052027 gene=OopSylGTG00000049129 name=cndp2 seq_id=scaffold_6 type=cds	NaN	NaN	NaN	NaN	NaN	3	0	3	3	474
327	>OopSylGTT00000054716 gene=OopSylGTG00000051685 seq_id=scaffold_7 type=cds	3	NaN	NaN	NaN	NaN	NaN	0	3	3	507
328	>OopSylGTT00000059984 gene=OopSylGTG00000056558 name=ogt_2 seq_id=scaffold_8 type=cds	NaN	NaN	NaN	3	NaN	NaN	0	3	3	1036
329	>OopSylGTT00000061589 gene=OopSylGTG00000058035 name=bgn seq_id=scaffold_8 type=cds	NaN	NaN	NaN	NaN	3	NaN	0	3	3	374
330	>OopSylGTT00000062566 gene=OopSylGTG00000058970 name=rangap1_4 seq_id=scaffold_9 type=cds	NaN	NaN	NaN	3	NaN	NaN	0	3	3	466
331	>OopSylGTT00000063847 gene=OopSylGTG00000060192 name=ift122 seq_id=scaffold_9 type=cds	NaN	NaN	NaN	NaN	NaN	3	0	3	3	398
332	>OopSylGTT00000065292 gene=OopSylGTG00000061518 name=zbed6_5 seq_id=scaffold_9 type=cds	NaN	NaN	NaN	NaN	NaN	3	0	3	3	210
333	>OopSylGTT00000071299 gene=OopSylGTG00000067273 name=nnmt_5 seq_id=scaffold_2089 type=cds	NaN	NaN	3	NaN	NaN	NaN	0	3	3	260
334	>OopSylGTT00000071629 gene=OopSylGTG00000067602 name=pced1a seq_id=scaffold_2716 type=cds	NaN	NaN	3	NaN	NaN	NaN	0	3	3	395
335	>OopSylGTT00000040914 gene=OopSylGTG00000038564 seq_id=scaffold_4 type=cds	NaN	2	2	2	NaN	2	0	2	8	203
336	>OopSylGTT00000032653 gene=OopSylGTG00000030795 name=mug2 seq_id=scaffold_3 type=cds	2	NaN	2	2	NaN	NaN	0	2	6	189
337	>OopSylGTT00000060767 gene=OopSylGTG00000057299 name=ass1_3 seq_id=scaffold_8 type=cds	1	2	2	1	NaN	NaN	0	2	6	122
338	>OopSylGTT00000004029 gene=OopSylGTG00000003830 name=uba52 seq_id=scaffold_1 type=cds	1	NaN	1	1	2	NaN	0	2	5	128
339	>OopSylGTT00000033894 gene=OopSylGTG00000031942 seq_id=scaffold_4 type=cds	1	NaN	2	NaN	2	NaN	0	2	5	323
340	>OopSylGTT00000002818 gene=OopSylGTG00000002681 name=c3_10 seq_id=scaffold_1 type=cds	2	NaN	2	NaN	NaN	NaN	0	2	4	177
341	>OopSylGTT00000002840 gene=OopSylGTG00000002701 seq_id=scaffold_1 type=cds	NaN	NaN	2	NaN	2	NaN	0	2	4	182
342	>OopSylGTT00000026214 gene=OopSylGTG00000024806 name=ahcy-b seq_id=scaffold_3 type=cds	NaN	2	NaN	NaN	2	NaN	0	2	4	433
343	>OopSylGTT00000026925 gene=OopSylGTG00000025472 name=gstp1 seq_id=scaffold_3 type=cds	2	NaN	2	NaN	NaN	NaN	0	2	4	152
344	>OopSylGTT00000032641 gene=OopSylGTG00000030785 name=a2ml1_5 seq_id=scaffold_3 type=cds	2	NaN	2	NaN	NaN	NaN	0	2	4	134
345	>OopSylGTT00000054136 gene=OopSylGTG00000051121 seq_id=scaffold_7 type=cds	1	2	NaN	NaN	NaN	1	0	2	4	344
346	>OopSylGTT00000058821 gene=OopSylGTG00000055474 seq_id=scaffold_8 type=cds	NaN	NaN	NaN	1	1	2	0	2	4	299
347	>OopSylGTT00000071463 gene=OopSylGTG00000067436 name=igkv3-15_2 seq_id=scaffold_2363 type=cds	2	NaN	NaN	NaN	2	NaN	0	2	4	113
348	>OopSylGTT00000072011 gene=OopSylGTG00000067981 name=pfn1 seq_id=scaffold_3796 type=cds	2	NaN	1	NaN	1	NaN	0	2	4	123
349	>OopSylGTT00000002185 gene=OopSylGTG00000002079 name=fabp4 seq_id=scaffold_1 type=cds	1	NaN	NaN	NaN	2	NaN	0	2	3	138
350	>OopSylGTT00000020977 gene=OopSylGTG00000019843 name=aldoc seq_id=scaffold_2 type=cds	NaN	NaN	2	NaN	NaN	1	0	2	3	250
351	>OopSylGTT00000029359 gene=OopSylGTG00000027767 name=pgd seq_id=scaffold_3 type=cds	NaN	NaN	NaN	NaN	1	2	0	2	3	482
352	>OopSylGTT00000032936 gene=OopSylGTG00000031061 name=crtac1 seq_id=scaffold_3 type=cds	1	NaN	2	NaN	NaN	NaN	0	2	3	360
353	>OopSylGTT00000043867 gene=OopSylGTG00000041354 name=kng1_2 seq_id=scaffold_5 type=cds	NaN	NaN	1	NaN	2	NaN	0	2	3	191
354	>OopSylGTT00000047872 gene=OopSylGTG00000045179 name=ugp2 seq_id=scaffold_5 type=cds	NaN	NaN	NaN	NaN	1	2	0	2	3	508
355	>OopSylGTT00000052979 gene=OopSylGTG00000050030 name=ggh seq_id=scaffold_6 type=cds	NaN	2	NaN	1	NaN	NaN	0	2	3	394
356	>OopSylGTT00000060755 gene=OopSylGTG00000057291 name=ass1 seq_id=scaffold_8 type=cds	NaN	1	NaN	NaN	NaN	2	0	2	3	131
357	>OopSylGTT00000066849 gene=OopSylGTG00000063006 seq_id=scaffold_10 type=cds	NaN	1	NaN	NaN	NaN	2	0	2	3	180
358	>OopSylGTT00000002905 gene=OopSylGTG00000002766 name=hpgds seq_id=scaffold_1 type=cds	NaN	NaN	NaN	NaN	2	NaN	0	2	2	172
359	>OopSylGTT00000010383 gene=OopSylGTG00000009821 name=iglv5-37_4 seq_id=scaffold_1 type=cds	NaN	NaN	NaN	NaN	2	NaN	0	2	2	109
360	>OopSylGTT00000012626 gene=OopSylGTG00000011949 name=vwa5a_2 seq_id=scaffold_1 type=cds	NaN	NaN	2	NaN	NaN	NaN	0	2	2	469
361	>OopSylGTT00000014182 gene=OopSylGTG00000013404 name=cul5_2 seq_id=scaffold_2 type=cds	2	NaN	NaN	NaN	NaN	NaN	0	2	2	475
362	>OopSylGTT00000014886 gene=OopSylGTG00000014078 name=krt6a_3 seq_id=scaffold_2 type=cds	NaN	NaN	2	NaN	NaN	NaN	0	2	2	558
363	>OopSylGTT00000014907 gene=OopSylGTG00000014097 seq_id=scaffold_2 type=cds	NaN	NaN	NaN	NaN	2	NaN	0	2	2	495
364	>OopSylGTT00000017719 gene=OopSylGTG00000016751 name=mtfr1l seq_id=scaffold_2 type=cds	2	NaN	NaN	NaN	NaN	NaN	0	2	2	394
365	>OopSylGTT00000026710 gene=OopSylGTG00000025274 name=nnmt_2 seq_id=scaffold_3 type=cds	NaN	NaN	NaN	NaN	2	NaN	0	2	2	119
366	>OopSylGTT00000030148 gene=OopSylGTG00000028464 seq_id=scaffold_3 type=cds	NaN	NaN	NaN	NaN	2	NaN	0	2	2	165
367	>OopSylGTT00000031061 gene=OopSylGTG00000029297 name=apoh seq_id=scaffold_3 type=cds	NaN	NaN	NaN	NaN	NaN	2	0	2	2	343
368	>OopSylGTT00000031233 gene=OopSylGTG00000029460 name=pcbd seq_id=scaffold_3 type=cds	2	NaN	NaN	NaN	NaN	NaN	0	2	2	104
369	>OopSylGTT00000032952 gene=OopSylGTG00000031077 name=pgam1 seq_id=scaffold_3 type=cds	2	NaN	NaN	NaN	NaN	NaN	0	2	2	198
370	>OopSylGTT00000041072 gene=OopSylGTG00000038709 name=prdx2 seq_id=scaffold_4 type=cds	2	NaN	NaN	NaN	NaN	NaN	0	2	2	239
371	>OopSylGTT00000041960 gene=OopSylGTG00000039548 seq_id=scaffold_5 type=cds	NaN	NaN	NaN	NaN	NaN	2	0	2	2	120
372	>OopSylGTT00000045862 gene=OopSylGTG00000043252 name=ezr seq_id=scaffold_5 type=cds	2	NaN	NaN	NaN	NaN	NaN	0	2	2	405
373	>OopSylGTT00000053581 gene=OopSylGTG00000050587 name=dpys seq_id=scaffold_6 type=cds	NaN	2	NaN	NaN	NaN	NaN	0	2	2	410
374	>OopSylGTT00000054778 gene=OopSylGTG00000051743 name=col6a3_4 seq_id=scaffold_7 type=cds	NaN	2	NaN	NaN	NaN	NaN	0	2	2	706
375	>OopSylGTT00000055990 gene=OopSylGTG00000052884 seq_id=scaffold_7 type=cds	NaN	NaN	2	NaN	NaN	NaN	0	2	2	280
376	>OopSylGTT00000056796 gene=OopSylGTG00000053607 name=asb8 seq_id=scaffold_7 type=cds	NaN	NaN	NaN	NaN	2	NaN	0	2	2	276
377	>OopSylGTT00000059235 gene=OopSylGTG00000055847 name=olfm4_4 seq_id=scaffold_8 type=cds	NaN	NaN	2	NaN	NaN	NaN	0	2	2	492
378	>OopSylGTT00000061365 gene=OopSylGTG00000057837 name=set seq_id=scaffold_8 type=cds	NaN	NaN	NaN	NaN	NaN	2	0	2	2	276
379	>OopSylGTT00000062654 gene=OopSylGTG00000059053 name=tst seq_id=scaffold_9 type=cds	NaN	NaN	NaN	NaN	2	NaN	0	2	2	295
380	>OopSylGTT00000064006 gene=OopSylGTG00000060336 name=abhd14b seq_id=scaffold_9 type=cds	NaN	NaN	NaN	NaN	2	NaN	0	2	2	210
381	>OopSylGTT00000065220 gene=OopSylGTG00000061449 name=prdx6 seq_id=scaffold_9 type=cds	2	NaN	NaN	NaN	NaN	NaN	0	2	2	224
382	>OopSylGTT00000066715 gene=OopSylGTG00000062880 name=pepd seq_id=scaffold_10 type=cds	NaN	2	NaN	NaN	NaN	NaN	0	2	2	252
383	>OopSylGTT00000066852 gene=OopSylGTG00000063009 name=ces1 seq_id=scaffold_10 type=cds	NaN	NaN	NaN	NaN	NaN	2	0	2	2	250
384	>OopSylGTT00000068303 gene=OopSylGTG00000064371 name=fut3 seq_id=scaffold_10 type=cds	2	NaN	NaN	NaN	NaN	NaN	0	2	2	337
385	>OopSylGTT00000071536 gene=OopSylGTG00000067509 name=muc13 seq_id=scaffold_2514 type=cds	2	NaN	NaN	NaN	NaN	NaN	0	2	2	424
386	>OopSylGTT00000072125 gene=OopSylGTG00000068094 seq_id=scaffold_4200 type=cds	NaN	NaN	NaN	NaN	NaN	2	0	2	2	179
387	>OopSylGTT00000009236 gene=OopSylGTG00000008765 seq_id=scaffold_1 type=cds	1	NaN	1	1	1	NaN	0	1	4	127
388	>OopSylGTT00000002827 gene=OopSylGTG00000002689 name=c3_8 seq_id=scaffold_1 type=cds	NaN	1	1	1	NaN	NaN	0	1	3	100
389	>OopSylGTT00000063983 gene=OopSylGTG00000060314 name=itih3 seq_id=scaffold_9 type=cds	NaN	NaN	1	NaN	1	1	0	1	3	142
390	>OopSylGTT00000000184 gene=OopSylGTG00000000177 name=igkv5-2 seq_id=scaffold_1 type=cds	1	NaN	NaN	NaN	1	NaN	0	1	2	116
391	>OopSylGTT00000002288 gene=OopSylGTG00000002171 name=anxa5 seq_id=scaffold_1 type=cds	NaN	NaN	NaN	NaN	1	NaN	0	1	1	318
392	>OopSylGTT00000006582 gene=OopSylGTG00000006222 name=vps72 seq_id=scaffold_1 type=cds	NaN	NaN	NaN	1	NaN	NaN	0	1	1	358
393	>OopSylGTT00000008186 gene=OopSylGTG00000007762 name=grhpr_3 seq_id=scaffold_1 type=cds	1	NaN	NaN	NaN	NaN	NaN	0	1	1	331
394	>OopSylGTT00000009387 gene=OopSylGTG00000008899 name=psme1 seq_id=scaffold_1 type=cds	NaN	NaN	NaN	NaN	1	NaN	0	1	1	201
395	>OopSylGTT00000012618 gene=OopSylGTG00000011941 name=vwa5a seq_id=scaffold_1 type=cds	1	NaN	NaN	NaN	NaN	NaN	0	1	1	759
396	>OopSylGTT00000015836 gene=OopSylGTG00000014981 name=lcp1_2 seq_id=scaffold_2 type=cds	NaN	NaN	1	NaN	NaN	NaN	0	1	1	191
397	>OopSylGTT00000015837 gene=OopSylGTG00000014982 name=lcp1 seq_id=scaffold_2 type=cds	1	NaN	NaN	NaN	NaN	NaN	0	1	1	365
398	>OopSylGTT00000018448 gene=OopSylGTG00000017440 name=msra_2 seq_id=scaffold_2 type=cds	1	NaN	NaN	NaN	NaN	NaN	0	1	1	141
399	>OopSylGTT00000019487 gene=OopSylGTG00000018434 name=gstm2_gstm4 seq_id=scaffold_2 type=cds	1	NaN	NaN	NaN	NaN	NaN	0	1	1	217
400	>OopSylGTT00000021468 gene=OopSylGTG00000020299 name=sod1 seq_id=scaffold_2 type=cds	1	NaN	NaN	NaN	NaN	NaN	0	1	1	150
401	>OopSylGTT00000024848 gene=OopSylGTG00000023528 name=myl4 seq_id=scaffold_3 type=cds	NaN	NaN	NaN	NaN	1	NaN	0	1	1	196
402	>OopSylGTT00000025864 gene=OopSylGTG00000024475 name=ctsa seq_id=scaffold_3 type=cds	1	NaN	NaN	NaN	NaN	NaN	0	1	1	109
403	>OopSylGTT00000029002 gene=OopSylGTG00000027448 name=nnmt_3 seq_id=scaffold_3 type=cds	NaN	NaN	NaN	NaN	1	NaN	0	1	1	211
404	>OopSylGTT00000030031 gene=OopSylGTG00000028367 name=mrto4 seq_id=scaffold_3 type=cds	1	NaN	NaN	NaN	NaN	NaN	0	1	1	190
405	>OopSylGTT00000030140 gene=OopSylGTG00000028457 name=fcgbp_10 seq_id=scaffold_3 type=cds	NaN	NaN	NaN	NaN	1	NaN	0	1	1	444
406	>OopSylGTT00000031737 gene=OopSylGTG00000029940 name=msmb_3 seq_id=scaffold_3 type=cds	1	NaN	NaN	NaN	NaN	NaN	0	1	1	113
407	>OopSylGTT00000032935 gene=OopSylGTG00000031060 name=crtac1_2 seq_id=scaffold_3 type=cds	NaN	NaN	NaN	NaN	1	NaN	0	1	1	122
408	>OopSylGTT00000033790 gene=OopSylGTG00000031845 seq_id=scaffold_4 type=cds	NaN	NaN	NaN	NaN	1	NaN	0	1	1	109
409	>OopSylGTT00000034804 gene=OopSylGTG00000032783 seq_id=scaffold_4 type=cds	NaN	NaN	NaN	NaN	1	NaN	0	1	1	106
410	>OopSylGTT00000039770 gene=OopSylGTG00000037502 name=pcyox1 seq_id=scaffold_4 type=cds	NaN	NaN	NaN	NaN	NaN	1	0	1	1	291
411	>OopSylGTT00000039779 gene=OopSylGTG00000037510 seq_id=scaffold_4 type=cds	NaN	NaN	NaN	NaN	NaN	1	0	1	1	233
412	>OopSylGTT00000040545 gene=OopSylGTG00000038223 name=vmo1_3 seq_id=scaffold_4 type=cds	NaN	NaN	NaN	NaN	1	NaN	0	1	1	187
413	>OopSylGTT00000042873 gene=OopSylGTG00000040408 name=adipoq seq_id=scaffold_5 type=cds	1	NaN	NaN	NaN	NaN	NaN	0	1	1	239
414	>OopSylGTT00000044544 gene=OopSylGTG00000041993 seq_id=scaffold_5 type=cds	NaN	1	NaN	NaN	NaN	NaN	0	1	1	145
415	>OopSylGTT00000045684 gene=OopSylGTG00000043080 name=arhgap18_2 seq_id=scaffold_5 type=cds	NaN	NaN	NaN	NaN	NaN	1	0	1	1	341
416	>OopSylGTT00000046926 gene=OopSylGTG00000044289 name=aldoc_2 seq_id=scaffold_5 type=cds	NaN	NaN	NaN	NaN	1	NaN	0	1	1	386
417	>OopSylGTT00000046964 gene=OopSylGTG00000044327 name=bub1 seq_id=scaffold_5 type=cds	NaN	1	NaN	NaN	NaN	NaN	0	1	1	624
418	>OopSylGTT00000047527 gene=OopSylGTG00000044856 name=efemp1 seq_id=scaffold_5 type=cds	NaN	NaN	NaN	NaN	1	NaN	0	1	1	319
419	>OopSylGTT00000053524 gene=OopSylGTG00000050538 name=ywhaz seq_id=scaffold_6 type=cds	1	NaN	NaN	NaN	NaN	NaN	0	1	1	126
420	>OopSylGTT00000054303 gene=OopSylGTG00000051287 name=idh1 seq_id=scaffold_7 type=cds	NaN	NaN	1	NaN	NaN	NaN	0	1	1	182
421	>OopSylGTT00000055524 gene=OopSylGTG00000052456 name=mgat5 seq_id=scaffold_7 type=cds	1	NaN	NaN	NaN	NaN	NaN	0	1	1	667
422	>OopSylGTT00000055555 gene=OopSylGTG00000052482 name=tuba_3 seq_id=scaffold_7 type=cds	NaN	NaN	NaN	NaN	1	NaN	0	1	1	448
423	>OopSylGTT00000057214 gene=OopSylGTG00000053976 seq_id=scaffold_7 type=cds	NaN	NaN	NaN	NaN	1	NaN	0	1	1	149
424	>OopSylGTT00000059033 gene=OopSylGTG00000055664 name=clic1 seq_id=scaffold_8 type=cds	1	NaN	NaN	NaN	NaN	NaN	0	1	1	240
425	>OopSylGTT00000059441 gene=OopSylGTG00000056042 name=peg10_49 seq_id=scaffold_8 type=cds	NaN	NaN	NaN	NaN	1	NaN	0	1	1	282
426	>OopSylGTT00000060023 gene=OopSylGTG00000056595 seq_id=scaffold_8 type=cds	1	NaN	NaN	NaN	NaN	NaN	0	1	1	389
427	>OopSylGTT00000060123 gene=OopSylGTG00000056689 name=pls3 seq_id=scaffold_8 type=cds	1	NaN	NaN	NaN	NaN	NaN	0	1	1	366
428	>OopSylGTT00000060563 gene=OopSylGTG00000057115 name=dlc1_2 seq_id=scaffold_8 type=cds	NaN	NaN	NaN	NaN	NaN	1	0	1	1	181
429	>OopSylGTT00000061608 gene=OopSylGTG00000058054 name=fcn1 seq_id=scaffold_8 type=cds	NaN	NaN	NaN	NaN	1	NaN	0	1	1	179
430	>OopSylGTT00000064773 gene=OopSylGTG00000061043 name=echdc2 seq_id=scaffold_9 type=cds	NaN	NaN	NaN	NaN	NaN	1	0	1	1	294
431	>OopSylGTT00000065135 gene=OopSylGTG00000061370 name=btbd8 seq_id=scaffold_9 type=cds	NaN	NaN	1	NaN	NaN	NaN	0	1	1	224
432	>OopSylGTT00000066186 gene=OopSylGTG00000062384 seq_id=scaffold_10 type=cds	NaN	NaN	1	NaN	NaN	NaN	0	1	1	147
433	>OopSylGTT00000071430 gene=OopSylGTG00000067404 name=hba5 seq_id=scaffold_2279 type=cds	NaN	NaN	1	NaN	NaN	NaN	0	1	1	142
434	>sp|ALBU_BOVIN|(Common contaminant protein)	100	104	103	129	191	149	1	191	776	607
435	>sp|TRYP_PIG|(Common contaminant protein)	62	177	60	116	49	126	1	177	590	231
436	>sp|K1C10_HUMAN|(Common contaminant protein)	44	53	64	79	56	62	1	79	358	593
437	>sp|K2C1_HUMAN|(Common contaminant protein)	44	41	66	74	67	42	1	74	334	643
438	>sp|K22E_HUMAN|(Common contaminant protein)	29	25	41	46	20	26	1	46	187	645
439	>sp|K1C9_HUMAN|(Common contaminant protein)	26	22	30	40	27	23	1	40	168	623
440	>Reverse >OopSylGTT00000020367 gene=OopSylGTG00000019276 name=f5 seq_id=scaffold_2 type=cds	12	NaN	10	3	32	3	1	32	60	1565
441	>Reverse >OopSylGTT00000018581 gene=OopSylGTG00000017564 name=dhdds_2 seq_id=scaffold_2 type=cds	NaN	NaN	NaN	NaN	26	1	1	26	27	102
442	>Reverse >OopSylGTT00000028137 gene=OopSylGTG00000026628 seq_id=scaffold_3 type=cds	NaN	NaN	12	NaN	NaN	20	1	20	32	200
443	>Reverse >OopSylGTT00000023341 gene=OopSylGTG00000022084 seq_id=scaffold_3 type=cds	NaN	19	NaN	NaN	NaN	NaN	1	19	19	376
444	>P00366|DHE3_BOVIN Glutamate dehydrogenase 1, mitochondrial - Bos taurus (Bovine).(Common contaminant protein)	9	13	6	8	4	16	1	16	56	558
445	>Reverse >OopSylGTT00000020068 gene=OopSylGTG00000018990 name=akap17a seq_id=scaffold_2 type=cds	NaN	NaN	8	13	14	NaN	1	14	35	667
446	>Reverse >OopSylGTT00000021187 gene=OopSylGTG00000020041 name=trpv3_3 seq_id=scaffold_2 type=cds	NaN	NaN	2	NaN	12	NaN	1	12	14	121
447	>Reverse >OopSylGTT00000059965 gene=OopSylGTG00000056541 name=med12_2 seq_id=scaffold_8 type=cds	12	NaN	NaN	NaN	NaN	NaN	1	12	12	1333
448	>Reverse >OopSylGTT00000072220 gene=OopSylGTG00000068189 name=irag2_3 seq_id=scaffold_4536 type=cds	6	3	8	3	11	NaN	1	11	31	352
449	>Reverse >OopSylGTT00000030554 gene=OopSylGTG00000028827 name=znf574 seq_id=scaffold_3 type=cds	NaN	5	3	NaN	11	4	1	11	23	914
450	>Reverse >OopSylGTT00000052358 gene=OopSylGTG00000049440 name=socs6 seq_id=scaffold_6 type=cds	NaN	NaN	NaN	NaN	11	NaN	1	11	11	534
451	>Reverse >OopSylGTT00000053799 gene=OopSylGTG00000050790 name=zhx1 seq_id=scaffold_6 type=cds	4	NaN	10	4	2	3	1	10	23	742
452	>sp|ALBU_HUMAN|(Common contaminant protein)	NaN	2	NaN	NaN	10	NaN	1	10	12	609
453	>Reverse >OopSylGTT00000024617 gene=OopSylGTG00000023309 seq_id=scaffold_3 type=cds	NaN	10	NaN	NaN	NaN	NaN	1	10	10	114
454	>Reverse >OopSylGTT00000067436 gene=OopSylGTG00000063550 seq_id=scaffold_10 type=cds	3	9	5	7	7	9	1	9	40	322
455	>Reverse >OopSylGTT00000061514 gene=OopSylGTG00000057966 name=sh2d3c seq_id=scaffold_8 type=cds	NaN	9	NaN	6	NaN	NaN	1	9	15	877
456	>Reverse >OopSylGTT00000026098 gene=OopSylGTG00000024695 name=pol_16 seq_id=scaffold_3 type=cds	NaN	7	NaN	6	NaN	6	1	7	19	693
457	>Reverse >OopSylGTT00000054833 gene=OopSylGTG00000051795 name=dip2a_4 seq_id=scaffold_7 type=cds	NaN	NaN	NaN	5	NaN	7	1	7	12	893
458	>Reverse >OopSylGTT00000064313 gene=OopSylGTG00000060627 name=ptger3 seq_id=scaffold_9 type=cds	7	NaN	3	2	NaN	NaN	1	7	12	380
459	>Reverse >OopSylGTT00000029193 gene=OopSylGTG00000027619 name=ppp2r1b seq_id=scaffold_3 type=cds	NaN	NaN	NaN	NaN	7	NaN	1	7	7	589
460	>Reverse >OopSylGTT00000056875 gene=OopSylGTG00000053673 name=telo2_2 seq_id=scaffold_7 type=cds	NaN	NaN	NaN	7	NaN	NaN	1	7	7	826
461	>Reverse >OopSylGTT00000036984 gene=OopSylGTG00000034875 name=ptprz1 seq_id=scaffold_4 type=cds	3	6	4	NaN	NaN	3	1	6	16	1202
462	>Reverse >OopSylGTT00000016435 gene=OopSylGTG00000015546 name=pdcd6ip seq_id=scaffold_2 type=cds	NaN	6	NaN	NaN	NaN	NaN	1	6	6	866
463	>Reverse >OopSylGTT00000032813 gene=OopSylGTG00000030945 name=mki67 seq_id=scaffold_3 type=cds	6	NaN	NaN	NaN	NaN	NaN	1	6	6	1571
464	>Reverse >OopSylGTT00000035423 gene=OopSylGTG00000033387 name=rgs14 seq_id=scaffold_4 type=cds	6	NaN	NaN	NaN	NaN	NaN	1	6	6	600
465	>Reverse >OopSylGTT00000059966 gene=OopSylGTG00000056542 name=med12_3 seq_id=scaffold_8 type=cds	NaN	NaN	NaN	NaN	6	NaN	1	6	6	1368
466	>Reverse >OopSylGTT00000019338 gene=OopSylGTG00000018294 seq_id=scaffold_2 type=cds	NaN	5	3	3	2	4	1	5	17	220
467	>Reverse >OopSylGTT00000071123 gene=OopSylGTG00000067100 name=tbc1d10b_2 seq_id=scaffold_1806 type=cds	5	NaN	NaN	NaN	NaN	NaN	1	5	5	1077
468	>Reverse >OopSylGTT00000025386 gene=OopSylGTG00000024029 name=mrpl45 seq_id=scaffold_3 type=cds	3	NaN	NaN	NaN	4	NaN	1	4	7	342
469	>Reverse >OopSylGTT00000034518 gene=OopSylGTG00000032520 name=fat2 seq_id=scaffold_4 type=cds	NaN	NaN	4	2	NaN	NaN	1	4	6	2164
470	>Reverse >OopSylGTT00000019040 gene=OopSylGTG00000018010 name=pgbd4_3 seq_id=scaffold_2 type=cds	1	NaN	NaN	NaN	4	NaN	1	4	5	143
471	>Reverse >OopSylGTT00000004885 gene=OopSylGTG00000004625 name=mlh3 seq_id=scaffold_1 type=cds	NaN	NaN	4	NaN	NaN	NaN	1	4	4	1075
472	>Reverse >OopSylGTT00000022734 gene=OopSylGTG00000021495 seq_id=scaffold_3 type=cds	NaN	NaN	4	NaN	NaN	NaN	1	4	4	222
473	>Reverse >OopSylGTT00000043994 gene=OopSylGTG00000041476 seq_id=scaffold_5 type=cds	NaN	NaN	NaN	NaN	4	NaN	1	4	4	436
474	>Reverse >OopSylGTT00000067775 gene=OopSylGTG00000063880 name=csga seq_id=scaffold_10 type=cds	NaN	NaN	NaN	NaN	4	NaN	1	4	4	286
475	>Reverse >OopSylGTT00000054869 gene=OopSylGTG00000051831 seq_id=scaffold_7 type=cds	3	2	2	NaN	NaN	NaN	1	3	7	300
476	>Reverse >OopSylGTT00000035898 gene=OopSylGTG00000033839 name=cep290_3 seq_id=scaffold_4 type=cds	NaN	3	NaN	NaN	NaN	3	1	3	6	415
477	>sp|K1C15_SHEEP|(Common contaminant protein)	1	NaN	2	NaN	NaN	3	1	3	6	453
478	>Reverse >OopSylGTT00000015059 gene=OopSylGTG00000014242 seq_id=scaffold_2 type=cds	NaN	2	NaN	NaN	NaN	3	1	3	5	110
479	>Reverse >OopSylGTT00000022142 gene=OopSylGTG00000020931 name=ndufb4 seq_id=scaffold_2 type=cds	NaN	3	NaN	NaN	NaN	2	1	3	5	538
480	>Reverse >OopSylGTT00000060631 gene=OopSylGTG00000057178 seq_id=scaffold_8 type=cds	NaN	3	NaN	1	NaN	NaN	1	3	4	239
481	>Reverse >OopSylGTT00000030486 gene=OopSylGTG00000028768 name=gbp6_2 seq_id=scaffold_3 type=cds	NaN	NaN	NaN	NaN	3	NaN	1	3	3	608
482	>Reverse >OopSylGTT00000038789 gene=OopSylGTG00000036578 name=ccpg1_2 seq_id=scaffold_4 type=cds	NaN	NaN	NaN	NaN	3	NaN	1	3	3	842
483	>Reverse >OopSylGTT00000041906 gene=OopSylGTG00000039496 name=tnfrsf21 seq_id=scaffold_5 type=cds	NaN	NaN	NaN	NaN	3	NaN	1	3	3	587
484	>Reverse >OopSylGTT00000046663 gene=OopSylGTG00000044037 seq_id=scaffold_5 type=cds	NaN	NaN	NaN	NaN	NaN	3	1	3	3	114
485	>Reverse >OopSylGTT00000052930 gene=OopSylGTG00000049985 name=fam110b seq_id=scaffold_6 type=cds	NaN	NaN	NaN	NaN	NaN	3	1	3	3	370
486	>Reverse >OopSylGTT00000055601 gene=OopSylGTG00000052526 name=cyp27a1_2 seq_id=scaffold_7 type=cds	NaN	NaN	NaN	NaN	NaN	3	1	3	3	537
487	>Reverse >OopSylGTT00000063768 gene=OopSylGTG00000060121 name=tpra1 seq_id=scaffold_9 type=cds	NaN	NaN	NaN	NaN	NaN	3	1	3	3	113
488	>Reverse >OopSylGTT00000064265 gene=OopSylGTG00000060580 name=zzz3 seq_id=scaffold_9 type=cds	NaN	NaN	3	NaN	NaN	NaN	1	3	3	864
489	>Reverse >OopSylGTT00000067724 gene=OopSylGTG00000063831 name=ctr9 seq_id=scaffold_10 type=cds	NaN	NaN	NaN	3	NaN	NaN	1	3	3	1157
490	>Reverse >OopSylGTT00000019901 gene=OopSylGTG00000018831 name=dennd2c seq_id=scaffold_2 type=cds	2	1	1	2	NaN	2	1	2	8	939
491	>Reverse >OopSylGTT00000042407 gene=OopSylGTG00000039968 name=mboat2_2 seq_id=scaffold_5 type=cds	NaN	2	1	NaN	NaN	NaN	1	2	3	311
492	>Reverse >OopSylGTT00000025965 gene=OopSylGTG00000024569 name=tgm3_5 seq_id=scaffold_3 type=cds	NaN	NaN	NaN	2	NaN	NaN	1	2	2	684
493	>Reverse >OopSylGTT00000036207 gene=OopSylGTG00000034138 name=slc25a3 seq_id=scaffold_4 type=cds	2	NaN	NaN	NaN	NaN	NaN	1	2	2	360
494	>Reverse >OopSylGTT00000039222 gene=OopSylGTG00000036993 name=wdr93 seq_id=scaffold_4 type=cds	2	NaN	NaN	NaN	NaN	NaN	1	2	2	334
495	>Reverse >OopSylGTT00000040027 gene=OopSylGTG00000037737 name=tcf7l1 seq_id=scaffold_4 type=cds	NaN	NaN	2	NaN	NaN	NaN	1	2	2	538
496	>Reverse >OopSylGTT00000041979 gene=OopSylGTG00000039567 seq_id=scaffold_5 type=cds	NaN	NaN	2	NaN	NaN	NaN	1	2	2	442
497	>Reverse >OopSylGTT00000047580 gene=OopSylGTG00000044905 seq_id=scaffold_5 type=cds	NaN	NaN	NaN	2	NaN	NaN	1	2	2	199
498	>Reverse >OopSylGTT00000055435 gene=OopSylGTG00000052371 name=epc2_2 seq_id=scaffold_7 type=cds	NaN	NaN	NaN	2	NaN	NaN	1	2	2	275
499	>Reverse >OopSylGTT00000055783 gene=OopSylGTG00000052697 name=sema5b_2 seq_id=scaffold_7 type=cds	NaN	NaN	NaN	2	NaN	NaN	1	2	2	504
500	>Reverse >OopSylGTT00000058873 gene=OopSylGTG00000055521 name=cfb_2 seq_id=scaffold_8 type=cds	NaN	NaN	NaN	NaN	2	NaN	1	2	2	727
501	>Reverse >OopSylGTT00000073433 gene=OopSylGTG00000069397 seq_id=scaffold_12423 type=cds	NaN	2	NaN	NaN	NaN	NaN	1	2	2	153
502	>Reverse >OopSylGTT00000008426 gene=OopSylGTG00000007994 name=znf462 seq_id=scaffold_1 type=cds	1	1	NaN	NaN	NaN	NaN	1	1	2	150
503	>Reverse >OopSylGTT00000000119 gene=OopSylGTG00000000116 seq_id=scaffold_1 type=cds	NaN	1	NaN	NaN	NaN	NaN	1	1	1	182
504	>Reverse >OopSylGTT00000003197 gene=OopSylGTG00000003047 seq_id=scaffold_1 type=cds	1	NaN	NaN	NaN	NaN	NaN	1	1	1	195
505	>Reverse >OopSylGTT00000022055 gene=OopSylGTG00000020847 seq_id=scaffold_2 type=cds	1	NaN	NaN	NaN	NaN	NaN	1	1	1	116
506	>Reverse >OopSylGTT00000036985 gene=OopSylGTG00000034875 name=ptprz1 seq_id=scaffold_4 type=cds	NaN	NaN	NaN	1	NaN	NaN	1	1	1	1008
507	>Reverse >OopSylGTT00000045157 gene=OopSylGTG00000042577 name=sobp seq_id=scaffold_5 type=cds	1	NaN	NaN	NaN	NaN	NaN	1	1	1	347
508	>Reverse >OopSylGTT00000048140 gene=OopSylGTG00000045433 name=tbcc seq_id=scaffold_5 type=cds	NaN	NaN	NaN	NaN	NaN	1	1	1	1	326
509	>Reverse >OopSylGTT00000073540 gene=OopSylGTG00000069503 name=slc66a2 seq_id=scaffold_13787 type=cds	NaN	NaN	NaN	NaN	NaN	1	1	1	1	106
510	>sp|CAS1_BOVIN|(Common contaminant protein)	1	NaN	NaN	NaN	NaN	NaN	1	1	1	214
