# Supplementary material for: Binding and sequestration of poison frog alkaloids by a plasma globulin
Source: eLife journal article supplement (doi:10.7554/elife.85096), 2023-12-14
Supplement: fig5-data1 [file 20230411_BSA+PTX_3reps_fractionbound_analysis_CompareResultsRawData.xlsx]

## Sheet: Export
NanoTemper Technologies	NanoTemper Technologies
MO.Affinity Analysis v3.0.5	MO.Affinity Analysis v3.0.5
Origin of exported data	Origin of exported data
Project Title:	20230407_BSA+PTX
Comment:
Project File Path:	C:\Users\nanotemper\Desktop\Aurora_MST\20230407_BSA\BSA+PTX analysis.nta3
Analysis-Set Name:	BSA+PTX
Exported from:	Compare Results (Chart)
Exported on:	2023-04-11 08:15:23
Sample Information	Sample Information			Sample Information	Sample Information			Sample Information	Sample Information
Merge-Set Name:	BSA+PTX_R1 (#16)			Merge-Set Name:	BSA+PTX_R2 (#17)			Merge-Set Name:	BSA+PTX_R3 (#18)
Date of Measurement:	2023-04-07 08:35:51.306 → 2023-04-07 08:42:31.468			Date of Measurement:	2023-04-07 08:52:31.777 → 2023-04-07 08:59:11.577			Date of Measurement:	2023-04-07 09:08:43 → 2023-04-07 09:15:22.949
Capillary Type:	Monolith Premium Capillary			Capillary Type:	Monolith Premium Capillary			Capillary Type:	Monolith Premium Capillary
Target:	BSA			Target:	BSA			Target:	BSA
TargetConcentration:	5e-09			TargetConcentration:	5e-09			TargetConcentration:	5e-09
Ligand:	PTX			Ligand:	PTX			Ligand:	PTX
Measurement Settings	Measurement Settings			Measurement Settings	Measurement Settings			Measurement Settings	Measurement Settings
MST-Power:	Medium			MST-Power:	Medium			MST-Power:	Medium
Excitation-Power:	30			Excitation-Power:	30			Excitation-Power:	30
Excitation type:	Pico - RED			Excitation type:	Pico - RED			Excitation type:	Pico - RED
Thermostat Setpoint:	25			Thermostat Setpoint:	25			Thermostat Setpoint:	25
Analysis Settings	Analysis Settings			Analysis Settings	Analysis Settings			Analysis Settings	Analysis Settings
Type of Analysis:	MST			Type of Analysis:	MST			Type of Analysis:	MST
Evaluation strategy:	On Time			Evaluation strategy:	On Time			Evaluation strategy:	On Time
Cold Region Start:	-1			Cold Region Start:	-1			Cold Region Start:	-1
Cold Region End:	0			Cold Region End:	0			Cold Region End:	0
Hot Region Start:	4			Hot Region Start:	4			Hot Region Start:	4
Hot Region End:	5			Hot Region End:	5			Hot Region End:	5
Fit Results (Kd)	Fit Results (Kd)			Fit Results (Kd)	Fit Results (Kd)			Fit Results (Kd)	Fit Results (Kd)
Fit Model:	Kd			Fit Model:	Kd			Fit Model:	Kd
Bound	863.015			Bound	825.886			Bound	821.461
Unbound	896.269			Unbound	895.722			Unbound	895.639
Kd	0.0054955			Kd	0.0145136			Kd	0.0159688
TargetConc	5e-09			TargetConc	5e-09			TargetConc	5e-09
Standard Deviation:	0.435234			Standard Deviation:	0.574324			Standard Deviation:	0.625053
Lower Kd Confidence:	0.00369761			Lower Kd Confidence:	0.00602271			Lower Kd Confidence:	0.00562877
Upper Kd Confidence:	0.00816759			Upper Kd Confidence:	0.0349751			Upper Kd Confidence:	0.0453032
Dose Response Curve	Dose Response Curve	Dose Response Curve		Dose Response Curve	Dose Response Curve	Dose Response Curve		Dose Response Curve	Dose Response Curve	Dose Response Curve
Dose	Response	Err-Values		Dose	Response	Err-Values		Dose	Response	Err-Values
1.52588e-07	-0.0123814	0		1.52588e-07	-0.0110848	0		1.52588e-07	-0.0135463	0
3.05176e-07	-0.00212273	0		3.05176e-07	0.00197909	0		3.05176e-07	0.0115579	0
6.10352e-07	0.0085159	0		6.10352e-07	-0.00472802	0		6.10352e-07	0.00517964	0
1.2207e-06	0.00196784	0		1.2207e-06	0.00161963	0		1.2207e-06	-0.00687875	0
2.44141e-06	0.0274318	0		2.44141e-06	-0.00382337	0		2.44141e-06	-0.00847141	0
4.88281e-06	0.0238759	0		4.88281e-06	-0.00717561	0		4.88281e-06	-0.00792087	0
9.76563e-06	-0.0100888	0		9.76563e-06	0.00541442	0		9.76563e-06	0.00611556	0
1.95313e-05	-0.00673664	0		1.95313e-05	-0.00212345	0		1.95313e-05	0.00820438	0
3.90625e-05	-0.000462276	0		3.90625e-05	0.0102072	0		3.90625e-05	0.00129563	0
7.8125e-05	-0.00448974	0		7.8125e-05	0.0102233	0		7.8125e-05	0.0125611	0
0.00015625	0.0296918	0		0.00015625	0.00849282	0		0.00015625	0.00579068	0
0.0003125	0.0503863	0		0.0003125	0.0299488	0		0.0003125	0.0197931	0
0.000625	0.107356	0		0.000625	0.0434643	0		0.000625	0.050514	0
0.00125	0.180706	0		0.00125	0.0927536	0		0.00125	0.0642973	0
0.0025	0.317688	0		0.0025	0.130944	0		0.0025	0.135286	0
0.005	0.474746	0		0.005	0.260088	0		0.005	0.238923	0

## Sheet: Fit-Values
Dose	BSA+PTX_R1 (#16)	FractionBound		Dose	BSA+PTX_R2 (#17)	FractionBound		Dose	BSA+PTX_R3 (#18)	FractionBound
0.00466516				0.00466516				0.00466516
0.00435275				0.00435275				0.00435275
0.00406126				0.00406126				0.00406126
0.00378929				0.00378929				0.00378929
0.00353553				0.00353553				0.00353553
0.00329877				0.00329877				0.00329877
0.00307786				0.00307786				0.00307786
0.00287175				0.00287175				0.00287175
0.00267943				0.00267943				0.00267943
0.0025				0.0025				0.0025
0.00233258				0.00233258				0.00233258
0.00217638				0.00217638				0.00217638
0.00203063				0.00203063				0.00203063
0.00189465				0.00189465				0.00189465
0.00176777				0.00176777				0.00176777
0.00164938				0.00164938				0.00164938
0.00153893				0.00153893				0.00153893
0.00143587				0.00143587				0.00143587
0.00133972				0.00133972				0.00133972
0.00125				0.00125				0.00125
0.00116629				0.00116629				0.00116629
0.00108819				0.00108819				0.00108819
0.00101532				0.00101532				0.00101532
0.000947323				0.000947323				0.000947323
0.000883883				0.000883883				0.000883883
0.000824692				0.000824692				0.000824692
0.000769465				0.000769465				0.000769465
0.000717936				0.000717936				0.000717936
0.000669858				0.000669858				0.000669858
0.000625				0.000625				0.000625
0.000583146				0.000583146				0.000583146
0.000544094				0.000544094				0.000544094
0.000507658				0.000507658				0.000507658
0.000473661				0.000473661				0.000473661
0.000441942				0.000441942				0.000441942
0.000412346				0.000412346				0.000412346
0.000384733				0.000384733				0.000384733
0.000358968				0.000358968				0.000358968
0.000334929				0.000334929				0.000334929
0.0003125				0.0003125				0.0003125
0.000291573				0.000291573				0.000291573
0.000272047				0.000272047				0.000272047
0.000253829				0.000253829				0.000253829
0.000236831				0.000236831				0.000236831
0.000220971				0.000220971				0.000220971
0.000206173				0.000206173				0.000206173
0.000192366				0.000192366				0.000192366
0.000179484				0.000179484				0.000179484
0.000167465				0.000167465				0.000167465
0.00015625				0.00015625				0.00015625
0.000145786				0.000145786				0.000145786
0.000136024				0.000136024				0.000136024
0.000126914				0.000126914				0.000126914
0.000118415				0.000118415				0.000118415
0.000110485				0.000110485				0.000110485
0.000103087				0.000103087				0.000103087
9.61832e-05				9.61832e-05				9.61832e-05
8.97421e-05				8.97421e-05				8.97421e-05
8.37323e-05				8.37323e-05				8.37323e-05
7.8125e-05				7.8125e-05				7.8125e-05
7.28932e-05				7.28932e-05				7.28932e-05
6.80118e-05				6.80118e-05				6.80118e-05
6.34572e-05				6.34572e-05				6.34572e-05
5.92077e-05				5.92077e-05				5.92077e-05
5.52427e-05				5.52427e-05				5.52427e-05
5.15433e-05				5.15433e-05				5.15433e-05
4.80916e-05				4.80916e-05				4.80916e-05
4.4871e-05				4.4871e-05				4.4871e-05
4.18662e-05				4.18662e-05				4.18662e-05
3.90625e-05				3.90625e-05				3.90625e-05
3.64466e-05				3.64466e-05				3.64466e-05
3.40059e-05				3.40059e-05				3.40059e-05
3.17286e-05				3.17286e-05				3.17286e-05
2.96038e-05				2.96038e-05				2.96038e-05
2.76214e-05				2.76214e-05				2.76214e-05
2.57716e-05				2.57716e-05				2.57716e-05
2.40458e-05				2.40458e-05				2.40458e-05
2.24355e-05				2.24355e-05				2.24355e-05
2.09331e-05				2.09331e-05				2.09331e-05
1.95313e-05				1.95313e-05				1.95313e-05
1.82233e-05				1.82233e-05				1.82233e-05
1.70029e-05				1.70029e-05				1.70029e-05
1.58643e-05				1.58643e-05				1.58643e-05
1.48019e-05				1.48019e-05				1.48019e-05
1.38107e-05				1.38107e-05				1.38107e-05
1.28858e-05				1.28858e-05				1.28858e-05
1.20229e-05				1.20229e-05				1.20229e-05
1.12178e-05				1.12178e-05				1.12178e-05
1.04665e-05				1.04665e-05				1.04665e-05
9.76563e-06				9.76563e-06				9.76563e-06
9.11165e-06				9.11165e-06				9.11165e-06
8.50147e-06				8.50147e-06				8.50147e-06
7.93215e-06				7.93215e-06				7.93215e-06
7.40096e-06				7.40096e-06				7.40096e-06
6.90534e-06				6.90534e-06				6.90534e-06
6.44291e-06				6.44291e-06				6.44291e-06
6.01145e-06				6.01145e-06				6.01145e-06
5.60888e-06				5.60888e-06				5.60888e-06
5.23327e-06				5.23327e-06				5.23327e-06
4.88281e-06				4.88281e-06				4.88281e-06
4.55583e-06				4.55583e-06				4.55583e-06
4.25074e-06				4.25074e-06				4.25074e-06
3.96608e-06				3.96608e-06				3.96608e-06
3.70048e-06				3.70048e-06				3.70048e-06
3.45267e-06				3.45267e-06				3.45267e-06
3.22145e-06				3.22145e-06				3.22145e-06
3.00572e-06				3.00572e-06				3.00572e-06
2.80444e-06				2.80444e-06				2.80444e-06
2.61663e-06				2.61663e-06				2.61663e-06
2.44141e-06				2.44141e-06				2.44141e-06
2.27791e-06				2.27791e-06				2.27791e-06
2.12537e-06				2.12537e-06				2.12537e-06
1.98304e-06				1.98304e-06				1.98304e-06
1.85024e-06				1.85024e-06				1.85024e-06
1.72633e-06				1.72633e-06				1.72633e-06
1.61073e-06				1.61073e-06				1.61073e-06
1.50286e-06				1.50286e-06				1.50286e-06
1.40222e-06				1.40222e-06				1.40222e-06
1.30832e-06				1.30832e-06				1.30832e-06
1.2207e-06				1.2207e-06				1.2207e-06
1.13896e-06				1.13896e-06				1.13896e-06
1.06268e-06				1.06268e-06				1.06268e-06
9.91519e-07				9.91519e-07				9.91519e-07
9.2512e-07				9.2512e-07				9.2512e-07
8.63167e-07				8.63167e-07				8.63167e-07
8.05364e-07				8.05364e-07				8.05364e-07
7.51431e-07				7.51431e-07				7.51431e-07
7.0111e-07				7.0111e-07				7.0111e-07
6.54159e-07				6.54159e-07				6.54159e-07
6.10352e-07				6.10352e-07				6.10352e-07
5.69478e-07				5.69478e-07				5.69478e-07
5.31342e-07				5.31342e-07				5.31342e-07
4.9576e-07				4.9576e-07				4.9576e-07
4.6256e-07				4.6256e-07				4.6256e-07
4.31584e-07				4.31584e-07				4.31584e-07
4.02682e-07				4.02682e-07				4.02682e-07
3.75715e-07				3.75715e-07				3.75715e-07
3.50555e-07				3.50555e-07				3.50555e-07
3.27079e-07				3.27079e-07				3.27079e-07
3.05176e-07				3.05176e-07				3.05176e-07
2.84739e-07				2.84739e-07				2.84739e-07
2.65671e-07				2.65671e-07				2.65671e-07
2.4788e-07				2.4788e-07				2.4788e-07
2.3128e-07				2.3128e-07				2.3128e-07
2.15792e-07				2.15792e-07				2.15792e-07
2.01341e-07				2.01341e-07				2.01341e-07
1.87858e-07				1.87858e-07				1.87858e-07
1.75277e-07				1.75277e-07				1.75277e-07
1.6354e-07				1.6354e-07				1.6354e-07
1.52588e-07				1.52588e-07				1.52588e-07
