# Supplementary material for: Binding and sequestration of poison frog alkaloids by a plasma globulin
Source: eLife journal article supplement (doi:10.7554/elife.85096), 2023-12-14
Supplement: fig5-data1 [file 20230411_OsABG+PTX_3reps_fractionbound_analysis_CompareResultsRawData.xlsx]

## Sheet: Export
NanoTemper Technologies	NanoTemper Technologies
MO.Affinity Analysis v3.0.5	MO.Affinity Analysis v3.0.5
Origin of exported data	Origin of exported data
Project Title:	20230407_BSA+PTX
Comment:
Project File Path:	C:\Users\nanotemper\Desktop\Aurora_MST\20230407_BSA\BSA+PTX analysis.nta3
Analysis-Set Name:	OsABG+PTX
Exported from:	Compare Results (Chart)
Exported on:	2023-04-11 08:25:03
Sample Information	Sample Information			Sample Information	Sample Information			Sample Information	Sample Information
Merge-Set Name:	OsABG+PTX_R1 (#20)			Merge-Set Name:	OsABG+PTX_R2 (#21)			Merge-Set Name:	OsABG+PTX_R3 (#22)
Date of Measurement:	2023-04-11 07:37:51.355 → 2023-04-11 07:44:31.302			Date of Measurement:	2023-04-11 07:54:00.614 → 2023-04-11 08:00:40.485			Date of Measurement:	2023-04-11 08:11:00.924 → 2023-04-11 08:17:40.828
Capillary Type:	Monolith Premium Capillary			Capillary Type:	Monolith Premium Capillary			Capillary Type:	Monolith Premium Capillary
Target:	OsABG			Target:	OsABG			Target:	OsABG
TargetConcentration:	5e-09			TargetConcentration:	5e-09			TargetConcentration:	5e-09
Ligand:	PTX			Ligand:	PTX			Ligand:	PTX
Measurement Settings	Measurement Settings			Measurement Settings	Measurement Settings			Measurement Settings	Measurement Settings
MST-Power:	Medium			MST-Power:	Medium			MST-Power:	Medium
Excitation-Power:	15			Excitation-Power:	15			Excitation-Power:	15
Excitation type:	Pico - RED			Excitation type:	Pico - RED			Excitation type:	Pico - RED
Thermostat Setpoint:	25			Thermostat Setpoint:	25			Thermostat Setpoint:	25
Analysis Settings	Analysis Settings			Analysis Settings	Analysis Settings			Analysis Settings	Analysis Settings
Type of Analysis:	MST			Type of Analysis:	MST			Type of Analysis:	MST
Evaluation strategy:	On Time			Evaluation strategy:	On Time			Evaluation strategy:	On Time
Cold Region Start:	-1			Cold Region Start:	-1			Cold Region Start:	-1
Cold Region End:	0			Cold Region End:	0			Cold Region End:	0
Hot Region Start:	4			Hot Region Start:	4			Hot Region Start:	4
Hot Region End:	5			Hot Region End:	5			Hot Region End:	5
Fit Results (Kd)	Fit Results (Kd)			Fit Results (Kd)	Fit Results (Kd)			Fit Results (Kd)	Fit Results (Kd)
Fit Model:	Kd			Fit Model:	Kd			Fit Model:	Kd
Bound	912.209			Bound	909.818			Bound	883.55
Unbound	900.7			Unbound	900.086			Unbound	902.092
Kd	3.23887e-05			Kd	4.95688e-05			Kd	6.81873e-10
TargetConc	5e-09			TargetConc	5e-09			TargetConc	4.45019e-05
Standard Deviation:	3.21007			Standard Deviation:	1.31301			Standard Deviation:	4.97885
Lower Kd Confidence:	5.36608e-06			Lower Kd Confidence:	1.98842e-05			Lower Kd Confidence:	n/a
Upper Kd Confidence:	0.000195493			Upper Kd Confidence:	0.000123569			Upper Kd Confidence:	n/a
Dose Response Curve	Dose Response Curve	Dose Response Curve		Dose Response Curve	Dose Response Curve	Dose Response Curve		Dose Response Curve	Dose Response Curve	Dose Response Curve
Dose	Response	Err-Values		Dose	Response	Err-Values		Dose	Response	Err-Values
3.05176e-08	-0.444441	0		3.05176e-08	-0.0885811	0		3.05176e-08	0.152951	0
6.10352e-08	0.106312	0		6.10352e-08	0.0727097	0		6.10352e-08	-0.0712991	0
1.2207e-07	0.165068	0		1.2207e-07	0.218618	0		1.2207e-07	-0.0706987	0
2.44141e-07	0.170733	0		2.44141e-07	0.0706467	0		2.44141e-07	0.0797667	0
4.88281e-07	0.110769	0		4.88281e-07	0.00976836	0		4.88281e-07	-0.0329993	0
9.76563e-07	0.0090047	0		9.76563e-07	0.181311	0		9.76563e-07	0.00465202	0
1.95313e-06	0.12986	0		1.95313e-06	-0.313659	0		1.95313e-06	0.0690139	0
3.90625e-06	0.124536	0		3.90625e-06	0.00176885	0		3.90625e-06	0.0411869	0
7.8125e-06	0.0631252	0		7.8125e-06	0.0359234	0		7.8125e-06	0.180746	0
1.5625e-05	0.280655	0		1.5625e-05	0.282767	0		1.5625e-05	0.337571	0
3.125e-05	0.37705	0		3.125e-05	0.424785	0		3.125e-05	0.712777	0
6.25e-05	0.523989	0		6.25e-05	0.564014	0		6.25e-05	0.964694	0
0.000125	1.04745	0		0.000125	0.743561	0		0.000125	1.10125	0
0.00025	1.53244	0		0.00025	0.851392	0		0.00025	1.2294	0
0.0005	0.679414	0		0.0005	0.927994	0		0.0005	1.44936	0
0.001	0.603388	0		0.001	0.899483	0		0.001	0.255378	0

## Sheet: Fit-Values
Dose	OsABG+PTX_R1 (#20)	FractionBound		Dose	OsABG+PTX_R2 (#21)	FractionBound		Dose	OsABG+PTX_R3 (#22)	FractionBound
0.000933033				0.000933033				0.000933033
0.000870551				0.000870551				0.000870551
0.000812252				0.000812252				0.000812252
0.000757858				0.000757858				0.000757858
0.000707107				0.000707107				0.000707107
0.000659754				0.000659754				0.000659754
0.000615572				0.000615572				0.000615572
0.000574349				0.000574349				0.000574349
0.000535887				0.000535887				0.000535887
0.0005				0.0005				0.0005
0.000466516				0.000466516				0.000466516
0.000435275				0.000435275				0.000435275
0.000406126				0.000406126				0.000406126
0.000378929				0.000378929				0.000378929
0.000353553				0.000353553				0.000353553
0.000329877				0.000329877				0.000329877
0.000307786				0.000307786				0.000307786
0.000287175				0.000287175				0.000287175
0.000267943				0.000267943				0.000267943
0.00025				0.00025				0.00025
0.000233258				0.000233258				0.000233258
0.000217638				0.000217638				0.000217638
0.000203063				0.000203063				0.000203063
0.000189465				0.000189465				0.000189465
0.000176777				0.000176777				0.000176777
0.000164938				0.000164938				0.000164938
0.000153893				0.000153893				0.000153893
0.000143587				0.000143587				0.000143587
0.000133972				0.000133972				0.000133972
0.000125				0.000125				0.000125
0.000116629				0.000116629				0.000116629
0.000108819				0.000108819				0.000108819
0.000101532				0.000101532				0.000101532
9.47323e-05				9.47323e-05				9.47323e-05
8.83883e-05				8.83883e-05				8.83883e-05
8.24692e-05				8.24692e-05				8.24692e-05
7.69465e-05				7.69465e-05				7.69465e-05
7.17936e-05				7.17936e-05				7.17936e-05
6.69858e-05				6.69858e-05				6.69858e-05
6.25e-05				6.25e-05				6.25e-05
5.83146e-05				5.83146e-05				5.83146e-05
5.44094e-05				5.44094e-05				5.44094e-05
5.07658e-05				5.07658e-05				5.07658e-05
4.73661e-05				4.73661e-05				4.73661e-05
4.41942e-05				4.41942e-05				4.41942e-05
4.12346e-05				4.12346e-05				4.12346e-05
3.84733e-05				3.84733e-05				3.84733e-05
3.58968e-05				3.58968e-05				3.58968e-05
3.34929e-05				3.34929e-05				3.34929e-05
3.125e-05				3.125e-05				3.125e-05
2.91573e-05				2.91573e-05				2.91573e-05
2.72047e-05				2.72047e-05				2.72047e-05
2.53829e-05				2.53829e-05				2.53829e-05
2.36831e-05				2.36831e-05				2.36831e-05
2.20971e-05				2.20971e-05				2.20971e-05
2.06173e-05				2.06173e-05				2.06173e-05
1.92366e-05				1.92366e-05				1.92366e-05
1.79484e-05				1.79484e-05				1.79484e-05
1.67465e-05				1.67465e-05				1.67465e-05
1.5625e-05				1.5625e-05				1.5625e-05
1.45786e-05				1.45786e-05				1.45786e-05
1.36024e-05				1.36024e-05				1.36024e-05
1.26914e-05				1.26914e-05				1.26914e-05
1.18415e-05				1.18415e-05				1.18415e-05
1.10485e-05				1.10485e-05				1.10485e-05
1.03087e-05				1.03087e-05				1.03087e-05
9.61832e-06				9.61832e-06				9.61832e-06
8.97421e-06				8.97421e-06				8.97421e-06
8.37323e-06				8.37323e-06				8.37323e-06
7.8125e-06				7.8125e-06				7.8125e-06
7.28932e-06				7.28932e-06				7.28932e-06
6.80118e-06				6.80118e-06				6.80118e-06
6.34572e-06				6.34572e-06				6.34572e-06
5.92077e-06				5.92077e-06				5.92077e-06
5.52427e-06				5.52427e-06				5.52427e-06
5.15433e-06				5.15433e-06				5.15433e-06
4.80916e-06				4.80916e-06				4.80916e-06
4.4871e-06				4.4871e-06				4.4871e-06
4.18662e-06				4.18662e-06				4.18662e-06
3.90625e-06				3.90625e-06				3.90625e-06
3.64466e-06				3.64466e-06				3.64466e-06
3.40059e-06				3.40059e-06				3.40059e-06
3.17286e-06				3.17286e-06				3.17286e-06
2.96038e-06				2.96038e-06				2.96038e-06
2.76214e-06				2.76214e-06				2.76214e-06
2.57716e-06				2.57716e-06				2.57716e-06
2.40458e-06				2.40458e-06				2.40458e-06
2.24355e-06				2.24355e-06				2.24355e-06
2.09331e-06				2.09331e-06				2.09331e-06
1.95312e-06				1.95312e-06				1.95312e-06
1.82233e-06				1.82233e-06				1.82233e-06
1.70029e-06				1.70029e-06				1.70029e-06
1.58643e-06				1.58643e-06				1.58643e-06
1.48019e-06				1.48019e-06				1.48019e-06
1.38107e-06				1.38107e-06				1.38107e-06
1.28858e-06				1.28858e-06				1.28858e-06
1.20229e-06				1.20229e-06				1.20229e-06
1.12178e-06				1.12178e-06				1.12178e-06
1.04665e-06				1.04665e-06				1.04665e-06
9.76562e-07				9.76562e-07				9.76562e-07
9.11165e-07				9.11165e-07				9.11165e-07
8.50147e-07				8.50147e-07				8.50147e-07
7.93215e-07				7.93215e-07				7.93215e-07
7.40096e-07				7.40096e-07				7.40096e-07
6.90534e-07				6.90534e-07				6.90534e-07
6.44291e-07				6.44291e-07				6.44291e-07
6.01145e-07				6.01145e-07				6.01145e-07
5.60888e-07				5.60888e-07				5.60888e-07
5.23327e-07				5.23327e-07				5.23327e-07
4.88281e-07				4.88281e-07				4.88281e-07
4.55583e-07				4.55583e-07				4.55583e-07
4.25074e-07				4.25074e-07				4.25074e-07
3.96608e-07				3.96608e-07				3.96608e-07
3.70048e-07				3.70048e-07				3.70048e-07
3.45267e-07				3.45267e-07				3.45267e-07
3.22145e-07				3.22145e-07				3.22145e-07
3.00572e-07				3.00572e-07				3.00572e-07
2.80444e-07				2.80444e-07				2.80444e-07
2.61663e-07				2.61663e-07				2.61663e-07
2.44141e-07				2.44141e-07				2.44141e-07
2.27791e-07				2.27791e-07				2.27791e-07
2.12537e-07				2.12537e-07				2.12537e-07
1.98304e-07				1.98304e-07				1.98304e-07
1.85024e-07				1.85024e-07				1.85024e-07
1.72633e-07				1.72633e-07				1.72633e-07
1.61073e-07				1.61073e-07				1.61073e-07
1.50286e-07				1.50286e-07				1.50286e-07
1.40222e-07				1.40222e-07				1.40222e-07
1.30832e-07				1.30832e-07				1.30832e-07
1.2207e-07				1.2207e-07				1.2207e-07
1.13896e-07				1.13896e-07				1.13896e-07
1.06268e-07				1.06268e-07				1.06268e-07
9.91519e-08				9.91519e-08				9.91519e-08
9.2512e-08				9.2512e-08				9.2512e-08
8.63167e-08				8.63167e-08				8.63167e-08
8.05364e-08				8.05364e-08				8.05364e-08
7.51431e-08				7.51431e-08				7.51431e-08
7.0111e-08				7.0111e-08				7.0111e-08
6.54159e-08				6.54159e-08				6.54159e-08
6.10352e-08				6.10352e-08				6.10352e-08
5.69478e-08				5.69478e-08				5.69478e-08
5.31342e-08				5.31342e-08				5.31342e-08
4.9576e-08				4.9576e-08				4.9576e-08
4.6256e-08				4.6256e-08				4.6256e-08
4.31584e-08				4.31584e-08				4.31584e-08
4.02682e-08				4.02682e-08				4.02682e-08
3.75715e-08				3.75715e-08				3.75715e-08
3.50555e-08				3.50555e-08				3.50555e-08
3.27079e-08				3.27079e-08				3.27079e-08
3.05176e-08				3.05176e-08				3.05176e-08
