# Supplementary material for: Binding and sequestration of poison frog alkaloids by a plasma globulin
Source: eLife journal article supplement (doi:10.7554/elife.85096), 2023-12-14
Supplement: fig5-data1 [file 20230411_OsABGm3+PTX_3reps_fractionbound_analysis_CompareResultsRawData.xlsx]

## Sheet: Export
NanoTemper Technologies	NanoTemper Technologies
MO.Affinity Analysis v3.0.5	MO.Affinity Analysis v3.0.5
Origin of exported data	Origin of exported data
Project Title:	20230407_BSA+PTX
Comment:
Project File Path:	C:\Users\nanotemper\Desktop\Aurora_MST\20230407_BSA\BSA+PTX analysis.nta3
Analysis-Set Name:	OsABGmut3+PTX
Exported from:	Compare Results (Chart)
Exported on:	2023-04-11 08:13:16
Sample Information	Sample Information			Sample Information	Sample Information			Sample Information	Sample Information
Merge-Set Name:	OsABGm3+PTX (#07)			Merge-Set Name:	OsABGm3+PTX (#08)			Merge-Set Name:	OsABGm3+PTX (#09)
Date of Measurement:	2023-03-11 16:53:48.433 → 2023-03-11 17:00:28.263			Date of Measurement:	2023-03-11 17:11:20.972 → 2023-03-11 17:18:00.849			Date of Measurement:	2023-03-11 17:28:45.81 → 2023-03-11 17:35:25.881
Capillary Type:	Monolith Premium Capillary			Capillary Type:	Monolith Premium Capillary			Capillary Type:	Monolith Premium Capillary
Target:	OsABGm3			Target:	OsABGm3			Target:	OsABGm3
TargetConcentration:	5e-09			TargetConcentration:	5e-09			TargetConcentration:	5e-09
Ligand:	MyLigand			Ligand:	PTX			Ligand:	PTX
Measurement Settings	Measurement Settings			Measurement Settings	Measurement Settings			Measurement Settings	Measurement Settings
MST-Power:	Medium			MST-Power:	Medium			MST-Power:	Medium
Excitation-Power:	20			Excitation-Power:	15			Excitation-Power:	15
Excitation type:	Pico - RED			Excitation type:	Pico - RED			Excitation type:	Pico - RED
Thermostat Setpoint:	25			Thermostat Setpoint:	25			Thermostat Setpoint:	25
Analysis Settings	Analysis Settings			Analysis Settings	Analysis Settings			Analysis Settings	Analysis Settings
Type of Analysis:	MST			Type of Analysis:	MST			Type of Analysis:	MST
Evaluation strategy:	On Time			Evaluation strategy:	On Time			Evaluation strategy:	On Time
Cold Region Start:	-1			Cold Region Start:	-1			Cold Region Start:	-1
Cold Region End:	0			Cold Region End:	0			Cold Region End:	0
Hot Region Start:	4			Hot Region Start:	4			Hot Region Start:	4
Hot Region End:	5			Hot Region End:	5			Hot Region End:	5
Fit Results (Kd)	Fit Results (Kd)			Fit Results (Kd)	Fit Results (Kd)			Fit Results (Kd)	Fit Results (Kd)
Fit Model:	Kd			Fit Model:	Kd			Fit Model:	Kd
Bound	931.419			Bound	928.189			Bound	932.755
Unbound	935.095			Unbound	935.797			Unbound	935.418
Kd	0.000578537			Kd	0.000926699			Kd	0.00011827
TargetConc	5e-09			TargetConc	5e-09			TargetConc	5e-09
Standard Deviation:	1.5577			Standard Deviation:	0.826941			Standard Deviation:	1.28496
Lower Kd Confidence:	1.82303e-05			Lower Kd Confidence:	0.000342432			Lower Kd Confidence:	5.72865e-06
Upper Kd Confidence:	0.0183599			Upper Kd Confidence:	0.00250786			Upper Kd Confidence:	0.00244172
Dose Response Curve	Dose Response Curve	Dose Response Curve		Dose Response Curve	Dose Response Curve	Dose Response Curve		Dose Response Curve	Dose Response Curve	Dose Response Curve
Dose	Response	Err-Values		Dose	Response	Err-Values		Dose	Response	Err-Values
				1.52588e-07	-0.0648659	0		1.52588e-07	-0.229298	0
				3.05176e-07	-0.0789047	0		3.05176e-07	0.228301	0
6.10352e-07	-0.387212	0		6.10352e-07	-0.0404518	0		6.10352e-07	-0.145953	0
1.2207e-06	0.655884	0		1.2207e-06	0.0996903	0		1.2207e-06	0.335165	0
2.44141e-06	0.45419	0		2.44141e-06	-0.0141743	0		2.44141e-06	-0.20237	0
4.88281e-06	-0.0877316	0		4.88281e-06	-0.0431155	0		4.88281e-06	-0.465409	0
9.76563e-06	-0.386843	0		9.76563e-06	0.101357	0		9.76563e-06	0.422092	0
1.95313e-05	-0.167083	0		1.95313e-05	-0.0606746	0		1.95313e-05	0.349777	0
3.90625e-05	-0.0692437	0		3.90625e-05	0.0785458	0		3.90625e-05	0.488517	0
7.8125e-05	-0.0650365	0		7.8125e-05	0.213181	0		7.8125e-05	0.268731	0
0.00015625	0.554863	0		0.00015625	0.0869512	0		0.00015625	0.386184	0
0.0003125	0.645281	0		0.0003125	0.300701	0		0.0003125	1.21244	0
0.000625	-0.173137	0		0.000625	0.449617	0		0.000625	-0.334778	0
0.00125	1.16921	0		0.00125	0.587857	0		0.00125	1.6693	0
0.0025	0.702838	0		0.0025	0.484591	0		0.0025	1.0784	0
0.005	0.875864	0		0.005	1.00601	0		0.005	0.862838	0
Dose Response Curve (Outliers)	Dose Response Curve (Outliers)	Dose Response Curve (Outliers)
Dose	Response	Err-Values
1.52588e-07	3.01959	0
3.05176e-07	9.11889	0

## Sheet: Fit-Values
Dose	OsABGm3+PTX (#07)	FractionBound		Dose	OsABGm3+PTX (#08)	FractionBound		Dose	OsABGm3+PTX (#09)	FractionBound
0.00466516				0.00466516				0.00466516
0.00435275				0.00435275				0.00435275
0.00406126				0.00406126				0.00406126
0.00378929				0.00378929				0.00378929
0.00353553				0.00353553				0.00353553
0.00329877				0.00329877				0.00329877
0.00307786				0.00307786				0.00307786
0.00287175				0.00287175				0.00287175
0.00267943				0.00267943				0.00267943
0.0025				0.0025				0.0025
0.00233258				0.00233258				0.00233258
0.00217638				0.00217638				0.00217638
0.00203063				0.00203063				0.00203063
0.00189465				0.00189465				0.00189465
0.00176777				0.00176777				0.00176777
0.00164938				0.00164938				0.00164938
0.00153893				0.00153893				0.00153893
0.00143587				0.00143587				0.00143587
0.00133972				0.00133972				0.00133972
0.00125				0.00125				0.00125
0.00116629				0.00116629				0.00116629
0.00108819				0.00108819				0.00108819
0.00101532				0.00101532				0.00101532
0.000947323				0.000947323				0.000947323
0.000883883				0.000883883				0.000883883
0.000824692				0.000824692				0.000824692
0.000769465				0.000769465				0.000769465
0.000717936				0.000717936				0.000717936
0.000669858				0.000669858				0.000669858
0.000625				0.000625				0.000625
0.000583146				0.000583146				0.000583146
0.000544094				0.000544094				0.000544094
0.000507658				0.000507658				0.000507658
0.000473661				0.000473661				0.000473661
0.000441942				0.000441942				0.000441942
0.000412346				0.000412346				0.000412346
0.000384733				0.000384733				0.000384733
0.000358968				0.000358968				0.000358968
0.000334929				0.000334929				0.000334929
0.0003125				0.0003125				0.0003125
0.000291573				0.000291573				0.000291573
0.000272047				0.000272047				0.000272047
0.000253829				0.000253829				0.000253829
0.000236831				0.000236831				0.000236831
0.000220971				0.000220971				0.000220971
0.000206173				0.000206173				0.000206173
0.000192366				0.000192366				0.000192366
0.000179484				0.000179484				0.000179484
0.000167465				0.000167465				0.000167465
0.00015625				0.00015625				0.00015625
0.000145786				0.000145786				0.000145786
0.000136024				0.000136024				0.000136024
0.000126914				0.000126914				0.000126914
0.000118415				0.000118415				0.000118415
0.000110485				0.000110485				0.000110485
0.000103087				0.000103087				0.000103087
9.61832e-05				9.61832e-05				9.61832e-05
8.97421e-05				8.97421e-05				8.97421e-05
8.37323e-05				8.37323e-05				8.37323e-05
7.8125e-05				7.8125e-05				7.8125e-05
7.28932e-05				7.28932e-05				7.28932e-05
6.80118e-05				6.80118e-05				6.80118e-05
6.34572e-05				6.34572e-05				6.34572e-05
5.92077e-05				5.92077e-05				5.92077e-05
5.52427e-05				5.52427e-05				5.52427e-05
5.15433e-05				5.15433e-05				5.15433e-05
4.80916e-05				4.80916e-05				4.80916e-05
4.4871e-05				4.4871e-05				4.4871e-05
4.18662e-05				4.18662e-05				4.18662e-05
3.90625e-05				3.90625e-05				3.90625e-05
3.64466e-05				3.64466e-05				3.64466e-05
3.40059e-05				3.40059e-05				3.40059e-05
3.17286e-05				3.17286e-05				3.17286e-05
2.96038e-05				2.96038e-05				2.96038e-05
2.76214e-05				2.76214e-05				2.76214e-05
2.57716e-05				2.57716e-05				2.57716e-05
2.40458e-05				2.40458e-05				2.40458e-05
2.24355e-05				2.24355e-05				2.24355e-05
2.09331e-05				2.09331e-05				2.09331e-05
1.95313e-05				1.95313e-05				1.95313e-05
1.82233e-05				1.82233e-05				1.82233e-05
1.70029e-05				1.70029e-05				1.70029e-05
1.58643e-05				1.58643e-05				1.58643e-05
1.48019e-05				1.48019e-05				1.48019e-05
1.38107e-05				1.38107e-05				1.38107e-05
1.28858e-05				1.28858e-05				1.28858e-05
1.20229e-05				1.20229e-05				1.20229e-05
1.12178e-05				1.12178e-05				1.12178e-05
1.04665e-05				1.04665e-05				1.04665e-05
9.76563e-06				9.76563e-06				9.76563e-06
9.11165e-06				9.11165e-06				9.11165e-06
8.50147e-06				8.50147e-06				8.50147e-06
7.93215e-06				7.93215e-06				7.93215e-06
7.40096e-06				7.40096e-06				7.40096e-06
6.90534e-06				6.90534e-06				6.90534e-06
6.44291e-06				6.44291e-06				6.44291e-06
6.01145e-06				6.01145e-06				6.01145e-06
5.60888e-06				5.60888e-06				5.60888e-06
5.23327e-06				5.23327e-06				5.23327e-06
4.88281e-06				4.88281e-06				4.88281e-06
4.55583e-06				4.55583e-06				4.55583e-06
4.25074e-06				4.25074e-06				4.25074e-06
3.96608e-06				3.96608e-06				3.96608e-06
3.70048e-06				3.70048e-06				3.70048e-06
3.45267e-06				3.45267e-06				3.45267e-06
3.22145e-06				3.22145e-06				3.22145e-06
3.00572e-06				3.00572e-06				3.00572e-06
2.80444e-06				2.80444e-06				2.80444e-06
2.61663e-06				2.61663e-06				2.61663e-06
2.44141e-06				2.44141e-06				2.44141e-06
2.27791e-06				2.27791e-06				2.27791e-06
2.12537e-06				2.12537e-06				2.12537e-06
1.98304e-06				1.98304e-06				1.98304e-06
1.85024e-06				1.85024e-06				1.85024e-06
1.72633e-06				1.72633e-06				1.72633e-06
1.61073e-06				1.61073e-06				1.61073e-06
1.50286e-06				1.50286e-06				1.50286e-06
1.40222e-06				1.40222e-06				1.40222e-06
1.30832e-06				1.30832e-06				1.30832e-06
1.2207e-06				1.2207e-06				1.2207e-06
1.13896e-06				1.13896e-06				1.13896e-06
1.06268e-06				1.06268e-06				1.06268e-06
9.91519e-07				9.91519e-07				9.91519e-07
9.2512e-07				9.2512e-07				9.2512e-07
8.63167e-07				8.63167e-07				8.63167e-07
8.05364e-07				8.05364e-07				8.05364e-07
7.51431e-07				7.51431e-07				7.51431e-07
7.0111e-07				7.0111e-07				7.0111e-07
6.54159e-07				6.54159e-07				6.54159e-07
6.10352e-07				6.10352e-07				6.10352e-07
5.69478e-07				5.69478e-07				5.69478e-07
5.31342e-07				5.31342e-07				5.31342e-07
4.9576e-07				4.9576e-07				4.9576e-07
4.6256e-07				4.6256e-07				4.6256e-07
4.31584e-07				4.31584e-07				4.31584e-07
4.02682e-07				4.02682e-07				4.02682e-07
3.75715e-07				3.75715e-07				3.75715e-07
3.50555e-07				3.50555e-07				3.50555e-07
3.27079e-07				3.27079e-07				3.27079e-07
3.05176e-07				3.05176e-07				3.05176e-07
2.84739e-07				2.84739e-07				2.84739e-07
2.65671e-07				2.65671e-07				2.65671e-07
2.4788e-07				2.4788e-07				2.4788e-07
2.3128e-07				2.3128e-07				2.3128e-07
2.15792e-07				2.15792e-07				2.15792e-07
2.01341e-07				2.01341e-07				2.01341e-07
1.87858e-07				1.87858e-07				1.87858e-07
1.75277e-07				1.75277e-07				1.75277e-07
1.6354e-07				1.6354e-07				1.6354e-07
1.52588e-07				1.52588e-07				1.52588e-07
