# Supplementary material for: Binding and sequestration of poison frog alkaloids by a plasma globulin
Source: eLife journal article supplement (doi:10.7554/elife.85096), 2023-12-14
Supplement: fig5-data1 [file BSA+PTX_R1 analysis_CapillaryScanRawData.xlsx]

## Sheet: RawData
NanoTemper Technologies	NanoTemper Technologies
MO.Affinity Analysis v3.0.5	MO.Affinity Analysis v3.0.5
Origin of exported data	Origin of exported data
Project Title:	20230407_BSA+PTX
Comment:
Project File Path:	C:\Users\nanotemper\Desktop\Aurora_MST\20230407_BSA\BSA+PTX analysis.nta3
Analysis-Set Name:	Analysis-Set #1
Exported from:	Capillary Scan (Raw Data Inspection)
Exported on:	2023-04-07 09:22:50
Sample Information	Sample Information		Sample Information	Sample Information		Sample Information	Sample Information		Sample Information	Sample Information		Sample Information	Sample Information		Sample Information	Sample Information		Sample Information	Sample Information		Sample Information	Sample Information		Sample Information	Sample Information		Sample Information	Sample Information		Sample Information	Sample Information		Sample Information	Sample Information		Sample Information	Sample Information		Sample Information	Sample Information		Sample Information	Sample Information		Sample Information	Sample Information
Merge-Set Name:	BSA+PTX_R1 (#16)		Merge-Set Name:	BSA+PTX_R1 (#16)		Merge-Set Name:	BSA+PTX_R1 (#16)		Merge-Set Name:	BSA+PTX_R1 (#16)		Merge-Set Name:	BSA+PTX_R1 (#16)		Merge-Set Name:	BSA+PTX_R1 (#16)		Merge-Set Name:	BSA+PTX_R1 (#16)		Merge-Set Name:	BSA+PTX_R1 (#16)		Merge-Set Name:	BSA+PTX_R1 (#16)		Merge-Set Name:	BSA+PTX_R1 (#16)		Merge-Set Name:	BSA+PTX_R1 (#16)		Merge-Set Name:	BSA+PTX_R1 (#16)		Merge-Set Name:	BSA+PTX_R1 (#16)		Merge-Set Name:	BSA+PTX_R1 (#16)		Merge-Set Name:	BSA+PTX_R1 (#16)		Merge-Set Name:	BSA+PTX_R1 (#16)
Run Name:	BSA+PTX_R1 (#16)		Run Name:	BSA+PTX_R1 (#16)		Run Name:	BSA+PTX_R1 (#16)		Run Name:	BSA+PTX_R1 (#16)		Run Name:	BSA+PTX_R1 (#16)		Run Name:	BSA+PTX_R1 (#16)		Run Name:	BSA+PTX_R1 (#16)		Run Name:	BSA+PTX_R1 (#16)		Run Name:	BSA+PTX_R1 (#16)		Run Name:	BSA+PTX_R1 (#16)		Run Name:	BSA+PTX_R1 (#16)		Run Name:	BSA+PTX_R1 (#16)		Run Name:	BSA+PTX_R1 (#16)		Run Name:	BSA+PTX_R1 (#16)		Run Name:	BSA+PTX_R1 (#16)		Run Name:	BSA+PTX_R1 (#16)
Date of Measurement:	2023-04-07 08:35:51		Date of Measurement:	2023-04-07 08:36:17		Date of Measurement:	2023-04-07 08:36:44		Date of Measurement:	2023-04-07 08:37:11		Date of Measurement:	2023-04-07 08:37:38		Date of Measurement:	2023-04-07 08:38:04		Date of Measurement:	2023-04-07 08:38:31		Date of Measurement:	2023-04-07 08:38:57		Date of Measurement:	2023-04-07 08:39:24		Date of Measurement:	2023-04-07 08:39:51		Date of Measurement:	2023-04-07 08:40:18		Date of Measurement:	2023-04-07 08:40:44		Date of Measurement:	2023-04-07 08:41:11		Date of Measurement:	2023-04-07 08:41:38		Date of Measurement:	2023-04-07 08:42:05		Date of Measurement:	2023-04-07 08:42:31
Capillary Type:	Monolith Premium Capillary		Capillary Type:	Monolith Premium Capillary		Capillary Type:	Monolith Premium Capillary		Capillary Type:	Monolith Premium Capillary		Capillary Type:	Monolith Premium Capillary		Capillary Type:	Monolith Premium Capillary		Capillary Type:	Monolith Premium Capillary		Capillary Type:	Monolith Premium Capillary		Capillary Type:	Monolith Premium Capillary		Capillary Type:	Monolith Premium Capillary		Capillary Type:	Monolith Premium Capillary		Capillary Type:	Monolith Premium Capillary		Capillary Type:	Monolith Premium Capillary		Capillary Type:	Monolith Premium Capillary		Capillary Type:	Monolith Premium Capillary		Capillary Type:	Monolith Premium Capillary
Capillary Position:	1		Capillary Position:	9		Capillary Position:	2		Capillary Position:	10		Capillary Position:	3		Capillary Position:	11		Capillary Position:	4		Capillary Position:	12		Capillary Position:	5		Capillary Position:	13		Capillary Position:	6		Capillary Position:	14		Capillary Position:	7		Capillary Position:	15		Capillary Position:	8		Capillary Position:	16
Ligand:	PTX		Ligand:	PTX		Ligand:	PTX		Ligand:	PTX		Ligand:	PTX		Ligand:	PTX		Ligand:	PTX		Ligand:	PTX		Ligand:	PTX		Ligand:	PTX		Ligand:	PTX		Ligand:	PTX		Ligand:	PTX		Ligand:	PTX		Ligand:	PTX		Ligand:	PTX
Ligand Concentration:	0.005		Ligand Concentration:	1.95313e-05		Ligand Concentration:	0.0025		Ligand Concentration:	9.76563e-06		Ligand Concentration:	0.00125		Ligand Concentration:	4.88281e-06		Ligand Concentration:	0.000625		Ligand Concentration:	2.44141e-06		Ligand Concentration:	0.0003125		Ligand Concentration:	1.2207e-06		Ligand Concentration:	0.00015625		Ligand Concentration:	6.10352e-07		Ligand Concentration:	7.8125e-05		Ligand Concentration:	3.05176e-07		Ligand Concentration:	3.90625e-05		Ligand Concentration:	1.52588e-07
Target:	BSA		Target:	BSA		Target:	BSA		Target:	BSA		Target:	BSA		Target:	BSA		Target:	BSA		Target:	BSA		Target:	BSA		Target:	BSA		Target:	BSA		Target:	BSA		Target:	BSA		Target:	BSA		Target:	BSA		Target:	BSA
TargetConcentration:	5e-09		TargetConcentration:	5e-09		TargetConcentration:	5e-09		TargetConcentration:	5e-09		TargetConcentration:	5e-09		TargetConcentration:	5e-09		TargetConcentration:	5e-09		TargetConcentration:	5e-09		TargetConcentration:	5e-09		TargetConcentration:	5e-09		TargetConcentration:	5e-09		TargetConcentration:	5e-09		TargetConcentration:	5e-09		TargetConcentration:	5e-09		TargetConcentration:	5e-09		TargetConcentration:	5e-09
Measurement Settings	Measurement Settings		Measurement Settings	Measurement Settings		Measurement Settings	Measurement Settings		Measurement Settings	Measurement Settings		Measurement Settings	Measurement Settings		Measurement Settings	Measurement Settings		Measurement Settings	Measurement Settings		Measurement Settings	Measurement Settings		Measurement Settings	Measurement Settings		Measurement Settings	Measurement Settings		Measurement Settings	Measurement Settings		Measurement Settings	Measurement Settings		Measurement Settings	Measurement Settings		Measurement Settings	Measurement Settings		Measurement Settings	Measurement Settings		Measurement Settings	Measurement Settings
MST-Power:	Medium		MST-Power:	Medium		MST-Power:	Medium		MST-Power:	Medium		MST-Power:	Medium		MST-Power:	Medium		MST-Power:	Medium		MST-Power:	Medium		MST-Power:	Medium		MST-Power:	Medium		MST-Power:	Medium		MST-Power:	Medium		MST-Power:	Medium		MST-Power:	Medium		MST-Power:	Medium		MST-Power:	Medium
Excitation-Power:	30		Excitation-Power:	30		Excitation-Power:	30		Excitation-Power:	30		Excitation-Power:	30		Excitation-Power:	30		Excitation-Power:	30		Excitation-Power:	30		Excitation-Power:	30		Excitation-Power:	30		Excitation-Power:	30		Excitation-Power:	30		Excitation-Power:	30		Excitation-Power:	30		Excitation-Power:	30		Excitation-Power:	30
Excitation type:	Pico - RED		Excitation type:	Pico - RED		Excitation type:	Pico - RED		Excitation type:	Pico - RED		Excitation type:	Pico - RED		Excitation type:	Pico - RED		Excitation type:	Pico - RED		Excitation type:	Pico - RED		Excitation type:	Pico - RED		Excitation type:	Pico - RED		Excitation type:	Pico - RED		Excitation type:	Pico - RED		Excitation type:	Pico - RED		Excitation type:	Pico - RED		Excitation type:	Pico - RED		Excitation type:	Pico - RED
Thermostat Setpoint:	25		Thermostat Setpoint:	25		Thermostat Setpoint:	25		Thermostat Setpoint:	25		Thermostat Setpoint:	25		Thermostat Setpoint:	25		Thermostat Setpoint:	25		Thermostat Setpoint:	25		Thermostat Setpoint:	25		Thermostat Setpoint:	25		Thermostat Setpoint:	25		Thermostat Setpoint:	25		Thermostat Setpoint:	25		Thermostat Setpoint:	25		Thermostat Setpoint:	25		Thermostat Setpoint:	25
Included	Included		Included	Included		Included	Included		Included	Included		Included	Included		Included	Included		Included	Included		Included	Included		Included	Included		Included	Included		Included	Included		Included	Included		Included	Included		Included	Included		Included	Included		Included	Included
Position [capillary-index]	Raw Fluorescence [counts]		Position [capillary-index]	Raw Fluorescence [counts]		Position [capillary-index]	Raw Fluorescence [counts]		Position [capillary-index]	Raw Fluorescence [counts]		Position [capillary-index]	Raw Fluorescence [counts]		Position [capillary-index]	Raw Fluorescence [counts]		Position [capillary-index]	Raw Fluorescence [counts]		Position [capillary-index]	Raw Fluorescence [counts]		Position [capillary-index]	Raw Fluorescence [counts]		Position [capillary-index]	Raw Fluorescence [counts]		Position [capillary-index]	Raw Fluorescence [counts]		Position [capillary-index]	Raw Fluorescence [counts]		Position [capillary-index]	Raw Fluorescence [counts]		Position [capillary-index]	Raw Fluorescence [counts]		Position [capillary-index]	Raw Fluorescence [counts]		Position [capillary-index]	Raw Fluorescence [counts]
0.500352	196.049		8.50182	113.43		1.50039	114.017		9.50067	94.6619		2.50051	77.2123		10.5003	80.1976		3.5011	77.1437		11.5007	71.1493		4.50143	93.8		12.5008	73.4397		5.50133	74.74		13.5008	63.1626		6.50029	58.2805		14.5005	60.6515		7.50019	70.7884		15.5006	74.4895
0.501949	197.662		8.503	118.816		1.50144	106.054		9.50164	84.1731		2.50189	77.0095		10.5019	71.6801		3.50214	76.9767		11.5024	69.3509		4.5024	87.0033		12.5024	70.0667		5.50279	71.8531		13.5021	72.536		6.50189	66.5028		14.5019	60.0103		7.50116	77.1288		15.5023	74.4358
0.503685	184.841		8.50391	112.952		1.50227	92.9262		9.50324	82.7744		2.50266	88.8374		10.5036	73.4367		3.50318	85.0797		11.5037	66.7414		4.50351	80.0694		12.5036	70.2635		5.50377	70.9166		13.503	70.4395		6.50362	74.1167		14.5035	71.8322		7.50199	71.0449		15.5036	74.4567
0.504797	187.603		8.50536	105.926		1.50373	95.7683		9.50484	87.4119		2.50384	74.0749		10.5047	74.1763		3.50478	79.6698		11.5046	66.7503		4.50525	85.4704		12.5046	65.0027		5.50495	70.0339		13.5043	75.3752		6.50481	75.1843		14.5048	73.2339		7.50359	64.7343		15.5046	68.5904
0.505769	187.162		8.5071	107.623		1.50546	105.21		9.50595	89.6784		2.50551	69.7386		10.5056	72.8611		3.50651	81.4293		11.5059	78.8228		4.50692	92.2015		12.506	65.5544		5.50661	76.5682		13.506	75.7331		6.50578	72.2587		14.5058	70.6035		7.50526	66.9979		15.5059	76.419
0.507297	176.67		8.50849	113.609		1.50664	122.899		9.50692	83.5021		2.50696	79.2254		10.5069	72.8402		3.50776	82.5686		11.5077	61.0183		4.50796	100.161		12.5078	76.091		5.50828	68.668		13.5076	74.7817		6.50724	73.6544		14.5071	72.0499		7.50637	72.9834		15.5076	78.8645
0.509102	175.018		8.50946	118.592		1.50755	122.902		9.50845	75.918		2.50794	70.1562		10.5087	71.2179		3.50867	90.1795		11.5091	67.6331		4.509	96.9225		12.5092	76.082		5.50932	72.8701		13.5086	75.0144		6.50904	60.5441		14.5089	61.8921		7.50734	69.9355		15.5091	87.2926
0.510283	180.836		8.51071	109.099		1.509	100.471		9.51025	78.8198		2.50912	66.309		10.5099	62.4469		3.51013	87.7608		11.5101	73.2518		4.5106	100.862		12.5101	80.2304		5.51029	74.3553		13.5097	85.9774		6.51029	73.2458		14.5104	75.25		7.5088	67.8926		15.51	81.1639
0.511185	172.766		8.51252	102.452		1.51074	99.6752		9.51151	74.2569		2.51078	68.8738		10.5109	75.4438		3.51193	78.5693		11.5113	72.1334		4.51233	102.458		12.5114	66.5565		5.51196	70.174		13.5114	80.4541		6.51119	74.7967		14.5113	69.0467		7.51054	78.8914		15.5112	68.6561
0.512713	174.045		8.51397	110.066		1.51213	89.0879		9.51241	77.9251		2.51245	67.4154		10.5122	70.6691		3.51318	77.9997		11.513	63.5443		4.51344	100.859		12.5132	64.2213		5.5137	75.1486		13.5131	76.8664		6.51265	74.236		14.5125	70.2844		7.51192	73.55		15.513	70.4156
0.514519	185.307		8.51488	116.671		1.5131	89.9528		9.5138	87.8354		2.51349	69.2704		10.514	66.1032		3.51408	74.4119		11.5146	70.1472		4.51435	92.9262		12.5146	56.6969		5.51481	66.2881		13.5142	72.7299		6.51446	71.9247		14.5142	75.5959		7.51283	88.0083		15.5146	68.9424
0.515699	177.395		8.51613	117.465		1.51435	99.5648		9.5156	87.8503		2.51453	77.6597		10.5155	69.1958		3.51554	90.0304		11.5157	76.8932		4.51594	94.0416		12.5155	72.0022		5.51571	71.1254		13.5151	62.2172		6.51571	67.4005		14.5157	76.2401		7.51415	80.2692		15.5156	78.9749
0.516463	178.671		8.51793	111.464		1.51609	102.449		9.51692	77.9758		2.51613	73.7141		10.5164	69.7207		3.51742	91.5185		11.5167	66.1658		4.51775	79.3715		12.5168	72.4973		5.51738	80.4571		13.5169	59.1365		6.51654	67.3826		14.5167	72.1871		7.51588	80.8806		15.5166	76.6666
0.517852	177.287		8.51946	106.209		1.51762	106.543		9.51782	79.3477		2.51787	79.9501		10.5176	68.8708		3.51867	97.1014		11.5184	68.7992		4.51879	79.5624		12.5186	72.6017		5.51918	74.069		13.5185	69.3867		6.51779	74.2747		14.5179	64.2482		7.51734	69.2555		15.5184	77.1944
0.519588	167.604		8.52029	95.7922		1.51852	90.5344		9.51914	86.72		2.51898	76.9737		10.5193	60.2906		3.51936	86.8631		11.5201	74.1435		4.51962	85.4644		12.5201	74.2598		5.52029	68.3012		13.5195	80.9462		6.51953	70.2307		14.5196	66.0406		7.51831	66.309		15.52	81.0923
0.520908	177.096		8.52127	107.897		1.51977	94.307		9.52102	89.6904		2.51995	68.2326		10.5209	68.4771		3.52068	77.6269		11.5211	63.7024		4.52108	84.1462		12.5209	78.1876		5.52106	72.3989		13.5204	69.6372		6.52092	70.3828		14.5212	64.272		7.51956	73.5948		15.521	77.5523
0.52181	183.947		8.52293	111.703		1.52157	95.6968		9.52241	83.5915		2.52155	70.69		10.5219	69.1958		3.52242	82.84		11.522	69.5627		4.52275	83.684		12.5219	77.8893		5.52252	75.5303		13.5219	76.9201		6.52189	83.7973		14.5221	66.8726		7.52137	65.8825		15.5219	79.1329
0.52306	164.055		8.52446	111.646		1.5231	112.44		9.52317	88.3603		2.52335	72.0857		10.523	62.6556		3.52374	78.4291		11.5235	67.1917		4.524	90.6417		12.5236	71.8024		5.52425	69.2644		13.5236	79.4491		6.52307	79.5594		14.5231	66.8368		7.52283	69.0497		15.5235	77.4628
0.524796	172.402		8.5255	103.943		1.52394	118.151		9.52435	86.5888		2.52439	64.4301		10.5247	59.3691		3.52471	81.7634		11.5252	62.6825		4.52497	86.2518		12.5252	68.0327		5.52543	70.0369		13.5248	77.0304		6.5248	67.9552		14.5247	61.8444		7.52366	67.5615		15.5252	81.5039
0.526324	184.794		8.52654	107.405		1.52498	111.596		9.52609	86.7587		2.52523	64.3943		10.5264	66.1777		3.52596	79.5803		11.5263	58.042		4.52636	89.8395		12.5262	80.1648		5.5264	81.826		13.5257	73.6604		6.5264	70.0398		14.5264	60.3354		7.5247	73.8513		15.5262	86.4695
0.527297	183.58		8.52814	108.756		1.52664	95.2882		9.52755	85.4316		2.52662	68.0566		10.5273	75.5542		3.52763	73.9706		11.5273	67.9373		4.52817	87.2389		12.5273	63.2312		5.52779	72.0798		13.5271	76.4339		6.52737	73.55		14.5274	68.3608		7.52644	78.3456		15.5272	82.6759
0.528408	195.81		8.52988	112.284		1.52817	96.5736		9.52852	85.1871		2.52835	60.732		10.5282	72.9506		3.52922	74.3404		11.5288	73.4307		4.52962	91.3217		12.5289	56.7596		5.5296	69.2555		13.529	62.1218		6.52842	71.4415		14.5285	71.2		7.5279	73.4665		15.5287	73.55
0.530144	177.925		8.53106	115.726		1.52921	99.368		9.52963	80.1618		2.5296	69.1004		10.5298	65.1936		3.53026	91.5991		11.5305	70.3798		4.53053	92.4073		12.5306	74.9398		5.53099	59.3959		13.5303	62.0383		6.53015	85.712		14.53	80.7345		7.52894	77.776		15.5305	68.8022
0.531741	175.352		8.53203	105.708		1.53025	101.581		9.53137	77.1527		2.53058	73.4934		10.5315	68.4711		3.53138	96.5497		11.5319	74.0451		4.53171	88.2976		12.5317	67.0963		5.53196	56.6283		13.5312	69.9235		6.53182	85.0469		14.5317	85.3481		7.53005	73.6097		15.5318	63.7114
0.532783	183.896		8.53349	116.838		1.53185	97.5756		9.53296	69.9802		2.53189	74.1525		10.5325	66.6996		3.53304	81.0655		11.5327	63.2879		4.53351	86.4277		12.5327	77.6776		5.53314	74.5133		13.5325	69.3151		6.53286	73.7946		14.533	79.5714		7.53165	67.7763		15.5327	75.2947
0.533824	187.776		8.53529	99.1771		1.53359	101.39		9.534	77.445		2.5337	62.5751		10.5335	64.7224		3.53471	78.8079		11.5341	64.454		4.53504	83.01		12.5342	70.9345		5.53488	76.2192		13.5343	72.0499		6.5339	71.6115		14.5339	70.6721		7.53331	62.924		15.5341	81.0565
0.53556	186.3		8.53654	101.14		1.5347	101.658		9.53505	82.1988		2.53509	65.623		10.5351	68.4503		3.53575	87.8503		11.5359	67.0307		4.53601	85.1274		12.536	72.5241		5.5364	75.9866		13.5358	69.9713		6.53557	61.0332		14.5353	61.1376		7.53442	67.0754		15.5359	75.6943
0.537227	175.608		8.53745	105.443		1.53567	96.6123		9.53664	86.0102		2.53599	60.0163		10.5368	69.7416		3.53672	83.7943		11.5373	66.6996		4.53712	78.9928		12.5372	81.5307		5.53738	72.5629		13.5367	68.7574		6.5373	65.3964		14.5371	69.6492		7.5354	72.2468		15.5373	70.174
0.53813	179.011		8.53891	117.593		1.5372	98.5687		9.53838	89.1178		2.53724	58.1255		10.538	81.823		3.53846	84.2715		11.5382	67.2961		4.53893	76.9141		12.5381	78.2889		5.53856	71.1314		13.5379	71.9754		6.53828	79.7771		14.5385	78.1786		7.53692	74.2121		15.5382	67.5407
0.539033	181.767		8.54071	123.778		1.53894	115.646		9.53949	77.7551		2.53898	66.4372		10.539	83.8092		3.54019	81.1371		11.5395	67.1023		4.54053	86.3651		12.5396	74.8742		5.54029	75.578		13.5398	71.2537		6.53911	78.1816		14.5394	74.6475		7.53873	72.0589		15.5395	80.1499
0.54063	202.258		8.54196	124.736		1.54025	105.535		9.54046	80.4541		2.54058	83.517		10.5403	80.6599		3.54117	83.6512		11.5413	69.8549		4.54143	93.0306		12.5414	71.2029		5.54189	67.5764		13.5412	73.0013		6.54064	72.1692		14.5407	73.7976		7.53991	74.9995		15.5413	78.0653
0.542297	177.925		8.54272	112.225		1.54116	107.256		9.54206	67.3021		2.54155	80.0247		10.5421	77.442		3.542	80.135		11.5428	70.5677		4.5424	93.9879		12.5427	65.5753		5.54279	80.5227		13.542	76.6218		6.5423	66.0346		14.5426	83.0935		7.54088	69.7893		15.5427	80.5525
0.543408	189.222		8.54397	118.962		1.54255	103.731		9.5438	68.6083		2.54266	75.7361		10.5435	64.6568		3.54353	72.8641		11.5435	73.0669		4.544	96.9523		12.5435	76.4339		5.54377	78.1368		13.5431	71.7934		6.54349	75.584		14.5439	81.6053		7.54241	62.8226		15.5435	71.871
0.54438	174.88		8.54571	120.179		1.54442	104.065		9.54491	76.4369		2.54439	79.3447		10.5443	61.7967		3.5452	67.9194		11.5446	74.4835		4.5456	92.3774		12.5448	74.2777		5.54543	79.8278		13.5448	69.4523		6.54446	81.999		14.5447	82.1868		7.54422	60.9438		15.5447	67.8449
0.545838	185.867		8.5471	118.723		1.54567	101.557		9.54567	73.2906		2.54599	73.9288		10.5457	69.5179		3.54638	73.1713		11.5464	69.166		4.54671	88.1932		12.5464	78.4053		5.54696	78.3068		13.5463	71.7994		6.54592	67.1947		14.546	78.0235		7.5454	68.3012		15.5464	81.155
0.547644	184.501		8.54807	127.852		1.54644	95.2196		9.54713	80.4153		2.54689	63.6159		10.5476	82.5716		3.54735	78.8973		11.5478	63.0016		4.54775	87.3343		12.5478	71.8084		5.54807	68.6411		13.5473	76.6397		6.54765	76.0403		14.5476	80.1469		7.54616	65.462		15.5479	87.5073
0.548963	186.389		8.54925	137.706		1.54775	106.06		9.54887	76.6308		2.54787	65.4918		10.549	79.0524		3.54874	89.9976		11.5489	68.0119		4.54928	86.2786		12.5487	71.7368		5.54904	61.3702		13.5484	53.8637		6.54904	80.6927		14.5491	82.4254		7.54755	73.3115		15.5488	76.8753
0.549866	168.719		8.55099	127.536		1.54949	109.019		9.55005	91.9987		2.54946	82.0347		10.5497	63.9022		3.55054	83.4215		11.55	71.5012		4.55108	89.9886		12.55	80.4482		5.55057	71.033		13.5501	74.0212		6.54994	68.9632		14.5501	83.001		7.54922	75.1873		15.55	68.3369
0.551185	175.012		8.55259	130.656		1.55081	108.202		9.55102	77.7104		2.55106	71.1045		10.5509	57.5678		3.55193	82.2077		11.5516	72.8432		4.55226	89.914		12.5517	72.2945		5.55238	70.5349		13.5517	79.118		6.55126	62.0681		14.5512	81.9244		7.55054	83.0517		15.5516	69.0109
0.552991	186.237		8.55363	137.318		1.55171	98.9236		9.55241	74.3642		2.55217	64.3705		10.5526	72.2617		3.55283	78.3307		11.5532	74.2628		4.55317	90.5224		12.5533	72.2855		5.55363	69.9653		13.5528	78.6379		6.553	62.8733		14.553	72.6345		7.55151	65.9153		15.5533	80.3915
0.55438	181.471		8.55467	128.162		1.55296	90.2302		9.55421	67.3677		2.55321	54.7077		10.554	77.612		3.55408	78.4917		11.5544	75.1217		4.55462	96.2067		12.5543	76.5711		5.55453	73.3055		13.5538	84.3371		6.55446	66.2612		14.5546	83.1442		7.55276	68.6411		15.5543	67.0933
0.555283	176.864		8.55634	121.715		1.5547	105.386		9.5556	71.6503		2.55474	61.412		10.555	75.4557		3.55589	74.743		11.5554	68.2057		4.55643	90.2123		12.5553	76.6517		5.55592	70.693		13.5554	83.7854		6.55543	65.9093		14.5556	67.9194		7.55449	74.7847		15.5553	75.9955
0.556602	178.236		8.558	121.044		1.5563	102.243		9.5565	83.9882		2.55648	75.4677		10.5562	75.7421		3.55742	74.8026		11.5569	62.7421		4.55775	89.3892		12.5571	68.4025		5.55772	67.3021		13.5572	68.5785		6.55668	76.0313		14.5566	71.4147		7.55602	78.2561		15.5569	75.915
0.558407	187.266		8.55904	120.963		1.55727	100.218		9.55775	82.0049		2.55773	80.636		10.5579	72.4555		3.55832	78.6498		11.5587	75.0412		4.55858	76.6457		12.5587	65.9958		5.55904	73.9228		13.5584	81.2743		6.55849	80.0634		14.5583	74.1495		7.55699	82.0526		15.5586	77.1825
0.559866	174.916		8.56009	135.016		1.55831	102.031		9.55949	88.6764		2.55863	75.5691		10.5595	76.8246		3.55957	75.4975		11.5598	77.0543		4.55997	80.6122		12.5598	55.6889		5.55995	72.3661		13.5593	77.7163		6.55994	71.8024		14.56	75.6317		7.55811	73.5292		15.5598	71.1045
0.56063	167.204		8.56175	124.026		1.56005	99.7169		9.56102	78.963		2.56002	83.7257		10.5606	81.2265		3.56138	81.4472		11.5608	71.6801		4.56185	81.8707		12.5608	65.4501		5.56133	76.5115		13.5608	70.7526		6.56078	68.2654		14.5611	78.4142		7.55984	79.4759		15.5607	74.6595
0.561741	163.151		8.56349	121.288		1.56171	106.934		9.56199	75.2291		2.56183	74.57		10.5616	70.4454		3.56283	92.5802		11.5623	70.2904		4.56317	89.6486		12.5625	69.6641		5.56321	74.6356		13.5626	71.9784		6.56182	61.3374		14.5621	79.9919		7.56144	80.8508		15.5623	82.0795
0.563477	177.773		8.56446	120.098		1.56275	110.197		9.5631	74.3821		2.56321	72.8909		10.5633	57.2606		3.56367	81.3935		11.5641	58.1821		4.56393	87.9785		12.5642	64.9401		5.56446	67.6659		13.5638	71.188		6.56355	62.6437		14.5637	78.5902		7.56248	75.2052		15.5641	78.9898
0.564935	180.475		8.56529	127.673		1.56373	105.333		9.56491	71.9634		2.56405	77.7999		10.5649	72.9238		3.56471	83.7138		11.5653	74.0511		4.56518	82.4016		12.5651	59.6017		5.56522	77.0364		13.5646	70.5677		6.56508	65.9392		14.5655	68.3996		7.56352	71.6413		15.5652	71.8292
0.565977	173.294		8.56682	122.967		1.56546	99.8392		9.56651	73.9139		2.56544	82.1033		10.566	74.9845		3.56638	87.8294		11.5661	76.6576		4.56685	87.1494		12.566	65.6588		5.56647	77.8804		13.566	70.9882		6.56605	69.0199		14.5665	70.7705		7.56526	70.5498		15.566	77.4807
0.567088	179.408		8.56849	115.839		1.5672	91.1666		9.56734	73.8781		2.56731	90.0512		10.567	66.3388		3.56797	84.2327		11.5675	67.1559		4.5683	83.7913		12.5676	65.1637		5.56821	72.378		13.5676	78.1905		6.56717	71.9843		14.5673	79.9919		7.56692	68.5994		15.5675	75.8524
0.568685	192.252		8.56967	114.754		1.56817	100.272		9.56838	70.5439		2.56863	70.5468		10.5686	71.0061		3.56895	73.9437		11.5691	66.3269		4.56928	90.427		12.5692	76.8455		5.5696	81.7962		13.569	73.9676		6.56876	74.8116		14.5687	85.6553		7.56783	66.0286		15.5691	65.6916
0.570352	189.527		8.57057	121.202		1.569	95.148		9.57005	74.4298		2.56939	65.7721		10.5704	70.9345		3.57006	78.7124		11.5705	63.8247		4.57046	92.0106		12.5703	74.0362		5.57057	77.0602		13.5699	70.5379		6.5705	76.8873		14.5705	83.1949		7.56873	63.7382		15.5704	71.4922
0.571463	168.471		8.57203	125.645		1.57053	107.972		9.57157	89.4548		2.57065	65.7513		10.5715	74.9279		3.57165	78.7751		11.5714	61.6208		4.57219	87.7906		12.5714	71.0359		5.57182	79.7891		13.5712	70.9942		6.57161	81.1937		14.5716	88.6555		7.57033	75.0889		15.5714	68.7425
0.572505	186.526		8.57384	133.077		1.5722	105.884		9.57262	80.9492		2.57231	71.6056		10.5722	63.7829		3.57339	82.9622		11.5727	70.7795		4.57379	94.9512		12.5728	67.5645		5.57349	75.2052		13.5729	77.9281		6.57251	68.6978		14.5726	88.4408		7.57192	71.6115		15.5727	79.1449
0.574032	179.843		8.57516	124.792		1.57338	92.7115		9.57366	82.324		2.5737	66.5177		10.5737	63.1537		3.5745	79.622		11.5745	79.1031		4.57476	85.2109		12.5746	61.406		5.57508	75.59		13.5744	75.6496		6.57411	57.5588		14.574	86.6961		7.57304	66.3686		15.5745	81.1848
0.575769	188.447		8.57606	143.077		1.57435	99.6543		9.57519	84.9544		2.57467	73.7737		10.5754	68.325		3.57547	80.8329		11.5759	71.5817		4.57587	88.3096		12.5759	60.3652		5.57613	81.647		13.5754	76.6606		6.57585	56.4017		14.5758	74.3791		7.57408	71.5161		15.5759	78.0056
0.576949	172.175		8.57738	134.965		1.57581	100.287		9.57699	85.3839		2.57585	76.0612		10.5766	71.3491		3.577	79.1329		11.5769	74.409		4.57754	92.8188		12.5768	62.8972		5.57724	86.8661		13.5766	71.7428		6.57703	67.824		14.5772	70.5319		7.57554	84.361		15.5769	80.4064
0.577852	170.857		8.57918	134.076		1.57755	88.1813		9.57817	81.5874		2.57759	74.2032		10.5776	70.7079		3.57881	82.503		11.578	67.4065		4.57921	90.5851		12.5781	68.8588		5.5789	95.5984		13.5783	75.0501		6.57793	75.6049		14.5782	80.4392		7.57734	69.7744		15.5781	76.601
0.57938	165.358		8.58064	128.884		1.57887	86.2458		9.57907	81.65		2.57919	80.7941		10.579	68.1998		3.58006	87.9875		11.5798	75.8673		4.58032	76.0194		12.5799	67.8806		5.58057	77.5881		13.5799	79.7712		6.57946	74.7788		14.5794	81.2385		7.57859	60.0133		15.5798	83.3768
0.581185	183.69		8.58154	135.857		1.57977	97.4683		9.58053	77.4927		2.58023	71.0508		10.5807	65.7871		3.58096	81.5665		11.5814	76.9499		4.58129	86.6126		12.5814	67.2722		5.58161	72.5211		13.581	66.9591		6.58133	68.492		14.5811	79.7503		7.57956	72.9267		15.5814	71.9784
0.582296	195.065		8.58279	140.712		1.58109	94.7722		9.58234	64.5971		2.58127	63.7919		10.5821	68.4175		3.58242	76.094		11.5823	72.6583		4.58289	93.472		12.5823	65.1787		5.58259	77.3286		13.582	64.7164		6.58251	65.6081		14.5826	79.8606		7.58088	82.0825		15.5824	77.1079
0.58313	195.441		8.5846	136.796		1.58289	107.468		9.58359	70.1084		2.58294	62.5691		10.583	82.3628		3.58422	71.9933		11.5834	68.0864		4.58462	85.697		12.5835	73.6246		5.58432	62.93		13.5837	69.9951		6.58328	63.1179		14.5836	74.1465		7.58269	74.2986		15.5835	69.0646
0.584519	188.417		8.58606	128.326		1.58428	107.886		9.58449	71.5161		2.5846	67.9641		10.5843	81.5814		3.58547	75.7957		11.5852	64.4003		4.58567	89.6934		12.5854	78.3754		5.58606	70.687		13.5853	68.7187		6.5846	62.7272		14.5848	80.8746		7.58408	75.9061		15.5853	71.3759
0.586185	166.321		8.58689	127.59		1.58519	93.2692		9.58588	82.9503		2.58571	74.2002		10.586	83.9733		3.58624	75.6138		11.5869	64.3705		4.5865	80.7732		12.5869	70.6363		5.5871	76.1148		13.5863	70.696		6.58633	73.0371		14.5865	73.9616		7.58498	71.3461		15.5869	80.5376
0.587505	171.394		8.58793	125.293		1.58644	95.6282		9.58768	85.032		2.58669	73.1027		10.5876	81.0715		3.58756	68.6382		11.5878	58.7368		4.58796	71.7845		12.5876	61.6744		5.58793	83.7198		13.5872	68.662		6.58772	64.3019		14.5881	77.0543		7.5863	74.7221		15.5878	84.7695
0.588477	168.233		8.5896	133.42		1.58831	111.106		9.589	75.6526		2.58835	69.9534		10.5885	68.5189		3.58922	73.3174		11.5887	63.4787		4.58969	84.5399		12.5887	66.8219		5.58939	75.3305		13.5888	65.1637		6.58862	63.6129		14.5889	84.8143		7.58811	75.8285		15.5888	80.2632
0.589797	176.879		8.59113	139.137		1.58977	104.217		9.58977	83.2843		2.59009	71.4445		10.5896	66.8667		3.59054	79.6966		11.5903	63.8336		4.59087	84.8769		12.5904	73.4546		5.59113	82.0616		13.5904	74.1316		6.58987	67.7196		14.59	81.7455		7.58956	64.0006		15.5904	74.3553
0.591533	171.844		8.59217	141.777		1.5906	104.853		9.59102	98.6194		2.59113	61.3285		10.5915	63.6338		3.59151	84.865		11.5919	73.2786		4.59185	87.0003		12.5919	75.1903		5.59231	81.7276		13.5915	71.9992		6.59168	72.4645		14.5916	89.6337		7.59033	60.1534		15.5921	67.4542
0.592991	157.139		8.59321	144.151		1.59171	90.7521		9.59276	90.931		2.59196	67.994		10.593	62.7689		3.59276	75.8315		11.593	71.4356		4.59324	81.7514		12.5929	69.5657		5.59328	72.715		13.5925	74.9905		6.59321	66.133		14.5932	94.4144		7.59144	77.779		15.5931	71.033
0.593963	162.912		8.59481	142.642		1.59338	85.36		9.59414	90.4926		2.59342	75.9687		10.5939	65.5127		3.5945	68.0119		11.5939	71.6056		4.59504	76.5085		12.594	68.8588		5.59474	60.562		13.594	69.2376		6.59411	78.286		14.5943	79.9471		7.59317	72.5301		15.5941	71.3282
0.595144	177.672		8.59654	154.645		1.59484	84.7039		9.59512	82.4314		2.59509	72.5062		10.5949	65.9511		3.5961	87.3343		11.5955	68.6143		4.59643	92.6965		12.5956	73.4218		5.59647	72.9923		13.5958	77.6746		6.59529	79.2612		14.5953	84.519		7.59463	73.4039		15.5957	92.121
0.59681	198.017		8.59772	153.939		1.59588	105.595		9.5963	83.7943		2.59627	77.0901		10.5965	63.6159		3.59707	83.854		11.5973	79.3149		4.59733	108.774		12.5973	81.6083		5.59786	74.06		13.5971	77.8595		6.59703	78.2263		14.5969	82.1391		7.5956	75.5989		15.5975	92.9888
0.598408	183.628		8.59863	145.543		1.59692	101.981		9.59796	80.7404		2.59724	66.7414		10.598	72.3839		3.59818	95.2166		11.5985	78.0176		4.59858	89.5979		12.5985	78.1995		5.59883	70.4425		13.598	67.5347		6.59862	76.4399		14.5986	87.8771		7.59672	74.913		15.5987	86.3681
0.59938	186.201		8.60015	124.631		1.59852	90.6626		9.59956	80.5555		2.59863	67.5824		10.5991	72.5718		3.59992	83.6512		11.5994	79.5236		4.60039	81.9453		12.5994	65.4501		5.60009	64.3406		13.5994	66.6877		6.5996	74.913		14.5998	95.2375		7.59838	73.4158		15.5996	66.9352
0.600491	185.411		8.60196	127.083		1.60025	89.2371		9.6006	83.4961		2.60044	70.523		10.6001	72.9864		3.60151	62.3962		11.6008	68.8827		4.60192	89.416		12.601	56.2854		5.60182	73.9974		13.6012	66.2851		6.60064	69.3808		14.6007	84.0627		7.60005	73.8035		15.601	57.2218
0.602227	178.737		8.60314	126.412		1.60137	84.7666		9.60164	97.3549		2.60183	63.1268		10.6017	66.127		3.60256	75.9031		11.6026	61.0601		4.60282	87.6862		12.6028	49.9807		5.60335	66.7831		13.6026	75.0859		6.60237	81.1251		14.6022	76.4041		7.60116	75.9478		15.6028	60.055
0.603894	171.549		8.60404	131.258		1.60234	95.3866		9.60331	82.0705		2.60273	78.6767		10.6035	69.9623		3.6036	72.5122		11.6039	56.8192		4.604	87.2329		12.6039	61.913		5.60425	73.723		13.6035	65.3785		6.60411	71.8322		14.604	71.2		7.6022	70.3202		15.6041	72.1871
0.604797	183.741		8.60557	133.041		1.60387	90.4151		9.60498	80.3945		2.60398	72.0291		10.6046	71.528		3.60533	77.2571		11.6048	62.5512		4.6058	79.464		12.6048	64.6001		5.6055	73.4665		13.6048	63.4579		6.60501	69.3897		14.6053	80.478		7.60373	75.5542		15.605	81.0774
0.605699	189.628		8.60745	129.191		1.60567	89.0044		9.60609	82.3121		2.60578	83.3559		10.6055	81.143		3.607	79.0733		11.6062	56.9474		4.60733	97.009		12.6064	67.4452		5.60731	82.327		13.6066	65.8527		6.60592	68.5218		14.6062	82.5686		7.60547	72.3183		15.6064	69.8609
0.607296	190.368		8.60863	141.255		1.60685	92.7801		9.60706	78.1398		2.60731	85.5688		10.607	76.6725		3.6079	81.9423		11.608	67.9999		4.60817	94.1191		12.6083	68.7545		5.60877	79.3328		13.608	69.3509		6.60751	66.6519		14.6076	77.0036		7.60665	63.6786		15.6083	80.1618
0.608963	199.845		8.60939	138.368		1.60775	102.389		9.60873	82.2912		2.60821	78.3367		10.6088	78.4828		3.60888	85.366		11.6094	82.1242		4.60921	92.7055		12.6094	70.6065		5.6096	67.1291		13.6088	64.4689		6.60918	70.6065		14.6095	82.8161		7.60762	66.5267		15.6096	76.7143
0.610005	189.72		8.61071	137.163		1.60928	96.833		9.61046	90.1705		2.60939	65.6051		10.6101	80.3468		3.6104	79.9322		11.6102	80.5197		4.61087	84.0985		12.6101	72.9088		5.61064	77.6507		13.6099	57.3083		6.61029	83.848		14.6107	87.1047		7.60915	70.4216		15.6103	77.1944
0.611046	178.265		8.61245	136.972		1.61109	100.266		9.6115	71.1016		2.6112	70.4604		10.611	73.0192		3.612	83.1889		11.6114	80.2901		4.6124	86.1891		12.6115	72.038		5.61231	74.1256		13.6117	69.0736		6.61126	69.0139		14.6115	88.2589		7.61095	72.1513		15.6116	75.7361
0.612574	171.275		8.61377	137.091		1.61227	96.9434		9.61234	78.8288		2.6128	74.9786		10.6124	80.1201		3.61318	76.5085		11.613	78.7005		4.61351	82.3419		12.6132	81.1192		5.6139	68.829		13.6131	66.9591		6.61279	76.6874		14.6128	81.3697		7.61206	74.5491		15.6132	74.8265
0.61438	174.016		8.61474	141.869		1.61303	98.3033		9.6138	78.9719		2.61363	78.2383		10.6142	73.9318		3.61415	79.2254		11.6145	82.6938		4.61455	76.5443		12.6145	81.3727		5.61495	67.4422		13.6141	67.4065		6.6146	80.0813		14.6145	80.2782		7.6129	68.2117		15.6147	69.3748
0.61556	161.913		8.61599	141.756		1.61442	101.694		9.61546	75.7868		2.6146	72.5718		10.6155	70.0219		3.61561	92.458		11.6155	71.8173		4.61608	92.9978		12.6155	71.7428		5.61599	77.1676		13.6152	61.916		6.61585	74.3672		14.6159	79.801		7.61429	77.2272		15.6157	66.4491
0.616463	170.675		8.61772	124.285		1.61616	108.24		9.61664	75.2261		2.61627	71.8949		10.6163	64.9281		3.61735	88.3125		11.6166	69.9146		4.61782	103.645		12.6168	64.8178		5.61758	86.9258		13.6169	78.9779		6.61682	75.6585		14.6169	72.2915		7.61602	84.0747		15.6168	69.1064
0.617921	165.116		8.61925	150.217		1.61748	100.698		9.61762	79.4103		2.61787	81.7425		10.6176	73.058		3.61867	84.4594		11.6183	75.8226		4.61907	85.3332		12.6185	67.2663		5.61925	76.2401		13.6185	82.8668		6.61814	66.139		14.618	71.3073		7.61727	75.1903		15.6186	89.0641
0.619658	190.63		8.62022	138.633		1.61838	105.24		9.61907	92.5176		2.61891	88.062		10.6193	79.2761		3.61957	69.8699		11.62	86.5381		4.61997	88.1485		12.62	79.1389		5.62043	66.139		13.6196	73.4814		6.61994	60.9289		14.6198	72.0738		7.61824	68.7694		15.6202	78.1577
0.620977	190.576		8.62134	128.44		1.6197	101.345		9.62081	80.6599		2.61995	78.9242		10.6207	80.982		3.62096	71.5847		11.621	77.3853		4.62143	94.7693		12.621	69.0616		5.6214	70.8272		13.6207	70.9614		6.62133	73.5202		14.6214	88.5959		7.61956	69.1541		15.6212	75.8196
0.62188	183.783		8.62307	126.021		1.62144	96.3559		9.6222	78.2979		2.62148	84.7337		10.6217	75.4885		3.62276	71.6503		11.622	72.2676		4.62323	88.1127		12.6221	58.0688		5.62286	73.8572		13.6222	81.3697		6.62223	70.4365		14.6223	95.1689		7.6213	64.1706		15.6223	68.5845
0.623269	178.892		8.62467	134.577		1.62289	102.425		9.62317	83.9643		2.62321	80.8627		10.6229	65.3785		3.62422	76.5115		11.6237	76.3982		4.62455	86.1772		12.6238	64.8924		5.62467	80.5525		13.624	79.4401		6.62355	76.8694		14.6235	91.3307		7.62276	67.8777		15.6239	75.6317
0.625144	159.098		8.62571	141.514		1.62387	95.6282		9.62442	87.8145		2.6244	78.0742		10.6246	71.2029		3.62506	83.5617		11.6254	69.4643		4.62539	100.91		12.6254	65.9272		5.62592	73.9467		13.6251	76.6517		6.62536	64.9341		14.6251	95.0466		7.62373	73.2488		15.6256	76.4876
0.626463	176.401		8.62675	134.413		1.62505	85.7597		9.62616	78.0653		2.62537	82.1272		10.6262	78.2233		3.62638	70.9703		11.6265	65.289		4.62685	83.9613		12.6264	71.8919		5.62682	73.4606		13.6261	71.707		6.62682	69.509		14.6268	86.6812		7.62491	77.4092		15.6267	77.7849
0.627297	180.275		8.62849	147.318		1.62671	90.5821		9.62769	81.6798		2.62683	79.9919		10.6271	71.0508		3.62818	63.6428		11.6275	78.611		4.62872	71.1701		12.6276	75.5333		5.62828	80.1947		13.6276	70.4544		6.62765	62.3425		14.6279	85.0618		7.62665	73.7379		15.6277	85.9326
0.628477	174.973		8.63016	132.695		1.62831	91.9331		9.62859	81.155		2.62856	87.6624		10.6283	55.0567		3.62964	70.7914		11.6291	72.1782		4.62997	78.7244		12.6293	64.3436		5.63008	78.3218		13.6294	79.7205		6.62876	63.6875		14.6289	90.5552		7.62824	72.1334		15.6293	80.8269
0.630144	184.531		8.63106	124.08		1.62935	96.8479		9.62984	77.4569		2.62988	82.4314		10.6299	69.3509		3.6304	82.7147		11.6308	70.7914		4.63073	90.424		12.631	64.4778		5.63134	70.9256		13.6306	80.7225		6.6305	64.8655		14.6305	92.5266		7.62922	70.6214		15.631	80.8955
0.631602	183.308		8.63196	112.38		1.63046	97.2148		9.63164	82.8549		2.63078	72.6404		10.6316	80.1708		3.63151	78.0623		11.6319	81.2504		4.63205	99.6364		12.6319	75.1814		5.63217	78.2114		13.6314	72.9685		6.63196	67.3468		14.6323	81.996		7.63033	76.6815		15.6321	77.3823
0.632644	187.865		8.63356	122.38		1.63213	88.5392		9.6331	85.87		2.63224	65.4172		10.6326	71.1016		3.63325	79.6489		11.6327	84.7427		4.63372	95.1719		12.6328	72.3422		5.63342	73.896		13.6328	71.0866		6.633	66.9651		14.6333	85.6821		7.63206	85.3362		15.6329	69.7804
0.633755	200.588		8.63522	138.108		1.63387	96.9374		9.63393	85.4286		2.63412	68.4234		10.6337	62.763		3.63471	86.0698		11.6341	80.9581		4.63504	82.9265		12.6344	72.1991		5.63515	76.1805		13.6344	67.9791		6.63411	67.5914		14.6341	84.5757		7.63373	78.9331		15.6343	71.2745
0.635422	190.809		8.63634	135.827		1.63477	95.2166		9.63505	88.068		2.63537	84.9425		10.6353	56.6134		3.63575	79.3805		11.6359	72.709		4.63601	86.9705		12.636	67.3051		5.63647	65.9183		13.6358	70.3291		6.63571	68.3012		14.6356	89.7351		7.63456	63.437		15.6361	75.3245
0.637088	179.33		8.63731	139.436		1.63567	81.2176		9.63664	92.4729		2.63606	78.9003		10.637	64.4987		3.63686	75.745		11.6371	69.3688		4.63726	82.9622		12.6371	70.2397		5.63752	65.4888		13.6367	71.358		6.63737	80.0962		14.6373	81.2593		7.63554	62.59		15.6373	73.8632
0.63813	169.345		8.63877	124.488		1.63727	83.2545		9.63817	85.1036		2.63738	80.8269		10.6381	75.8375		3.63846	83.1949		11.638	58.379		4.63893	79.5714		12.6381	66.0197		5.63877	78.3963		13.638	68.9245		6.63849	75.9866		14.6385	80.3736		7.63713	66.9144		15.6382	77.7849
0.639171	178.03		8.64057	126.012		1.63887	104.283		9.63921	76.6725		2.63912	80.132		10.6389	78.8884		3.64013	90.94		11.6394	67.7136		4.64053	90.3316		12.6396	67.481		5.64043	77.9877		13.6398	80.806		6.63953	72.712		14.6394	90.9966		7.63873	64.6985		15.6397	76.5413
0.640769	193.776		8.64182	127.253		1.64005	97.6412		9.64025	78.7303		2.64044	71.704		10.6403	81.0148		3.64124	75.8285		11.6412	70.8302		4.64157	85.8611		12.6414	73.7499		5.64203	74.576		13.6412	73.5292		6.64106	70.5468		14.6408	81.8588		7.63984	75.6317		15.6415	85.3213
0.642505	183.997		8.64279	124.622		1.64102	93.6419		9.64185	70.4216		2.64141	69.5		10.6421	70.4604		3.64228	72.5689		11.6425	73.2011		4.64268	77.5821		12.6426	68.1431		5.64307	73.893		13.6421	64.3794		6.64279	72.4108		14.6426	78.2353		7.64081	79.0614		15.6429	82.9533
0.643616	168.543		8.64411	140.139		1.64248	79.9919		9.64359	75.6884		2.64266	77.8625		10.6433	69.0825		3.64381	83.8659		11.6435	70.1502		4.64435	90.266		12.6435	76.1536		5.64411	74.1435		13.6433	73.2667		6.64397	75.241		14.644	88.3782		7.64234	74.2449		15.6438	86.717
0.644588	177.931		8.64592	126.785		1.64421	83.7198		9.64477	85.0976		2.64433	84.9037		10.6442	68.7694		3.64554	89.3772		11.6447	82.5656		4.64601	87.0122		12.6449	64.6836		5.64585	77.8237		13.6451	74.8145		6.64494	71.5817		14.645	85.9923		7.64415	81.7425		15.645	68.5785
0.646116	178.683		8.64731	136.331		1.64553	94.1281		9.64574	95.2643		2.64592	86.9317		10.6456	71.8352		3.64672	74.7102		11.6464	84.1194		4.64712	79.7563		12.6467	62.0413		5.64752	77.6478		13.6467	74.901		6.64647	67.2782		14.6462	86.9943		7.6454	83.2515		15.6468	65.8944
0.647852	190.493		8.64821	131.174		1.64644	88.9627		9.6472	76.6338		2.64689	81.5665		10.6474	69.8192		3.64769	76.4071		11.648	71.5131		4.6481	83.5199		12.6481	78.6289		5.64856	78.0176		13.6476	71.0538		6.64828	79.3745		14.648	85.8491		7.6463	83.9643		15.6483	70.8272
0.648963	185.423		8.64953	130.149		1.64775	90.8237		9.649	78.119		2.64801	80.8239		10.6488	70.6691		3.64922	68.6113		11.6489	76.0462		4.64976	85.6851		12.649	73.2637		5.6496	76.0462		13.6487	76.9529		6.64939	76.6964		14.6495	86.0162		7.64769	78.5216		15.6493	76.4817
0.649796	172.122		8.65141	131.252		1.64956	82.667		9.65025	77.4658		2.64974	71.874		10.6497	67.6003		3.65103	62.8674		11.6501	73.0669		4.6515	89.6963		12.6503	58.6325		5.65127	81.7097		13.6505	80.3259		6.65022	74.3851		14.6504	71.5847		7.64949	83.8062		15.6505	77.5523
0.651255	174.836		8.65279	140.608		1.65095	78.3635		9.65116	80.1469		2.65141	73.3323		10.651	68.8946		3.65221	85.5986		11.6519	70.4097		4.65247	82.8549		12.6521	58.8054		5.653	72.3631		13.6521	75.1068		6.65161	74.0809		14.6516	76.8545		7.65081	81.9811		15.6523	82.7088
0.652921	183.848		8.65356	135.985		1.65185	83.9643		9.65262	84.868		2.65245	67.6331		10.6528	76.589		3.65297	74.9905		11.6534	68.9215		4.6533	84.6115		12.6535	71.3879		5.65397	61.7699		13.6531	63.765		6.65335	65.6707		14.6535	92.1269		7.65172	78.441		15.6538	76.6517
0.654171	212.735		8.65467	124.921		1.65317	82.7416		9.65442	73.5441		2.65342	72.9595		10.6542	78.0802		3.65436	75.7092		11.6544	65.629		4.65483	87.221		12.6544	77.2809		5.65481	74.8116		13.654	62.5244		6.6546	73.2071		14.6549	98.7566		7.6531	74.8145		15.6546	74.9368
0.655144	189.324		8.6564	117.071		1.65498	85.2407		9.65567	77.1229		2.65509	80.475		10.6551	73.392		3.65603	85.7925		11.6553	68.501		4.6565	86.7587		12.6555	73.6335		5.65634	76.1387		13.6556	62.9807		6.65557	80.9581		14.6557	87.9487		7.65491	73.8035		15.6557	77.7849
0.656463	171.901		8.65786	125.052		1.65644	94.1758		9.65644	84.0896		2.65683	73.5262		10.6564	65.8795		3.65735	86.7856		11.657	82.5149		4.65768	91.6706		12.6572	71.7636		5.658	78.3665		13.6572	69.9772		6.65689	78.0444		14.6568	80.3736		7.6563	82.9891		15.6573	80.1022
0.658269	189.437		8.65884	131.142		1.6572	91.7362		9.65769	79.3775		2.65787	72.5867		10.6582	69.9146		3.65825	73.7677		11.6586	74.9398		4.65865	95.5327		12.6587	69.6342		5.65918	85.527		13.6583	61.2241		6.65862	73.4725		14.6585	83.9733		7.65713	77.4151		15.6589	73.9706
0.659727	188.647		8.65995	138.055		1.65831	86.3442		9.65942	70.9137		2.6587	76.3296		10.6596	86.8423		3.65957	73.6842		11.6596	67.6212		4.66011	98.521		12.6596	64.6866		5.66022	79.2314		13.6593	67.66		6.66008	69.9981		14.6601	84.6801		7.65831	68.0059		15.66	73.1355
0.66063	174.114		8.66161	140.16		1.66005	90.3167		9.66081	79.9769		2.66023	66.2076		10.6605	81.2534		3.66138	80.9074		11.6607	68.8827		4.66192	90.9161		12.6607	77.779		5.66161	75.5392		13.6608	61.069		6.66106	69.1123		14.6611	81.7216		7.65998	63.8038		15.661	81.9572
0.66181	177.066		8.66328	120.73		1.6615	88.7957		9.66178	79.6042		2.66189	71.8591		10.6616	74.3195		3.66283	82.1868		11.6622	72.4854		4.6633	93.6897		12.6624	77.5762		5.66342	84.7695		13.6626	62.1814		6.66223	71.2268		14.6621	101.781		7.66144	68.9602		15.6626	80.478
0.663616	177.687		8.66439	120.832		1.66255	87.6952		9.66296	88.1366		2.66308	76.2282		10.6633	69.0646		3.66374	84.1075		11.6639	70.5021		4.66421	83.177		12.6641	62.8286		5.66474	79.4342		13.6639	69.4643		6.66397	71.6324		14.6637	101.02		7.66241	71.355		15.6643	77.3137
0.665144	193.463		8.66536	140.509		1.66366	79.6638		9.6647	78.7572		2.66398	75.8912		10.6648	68.5457		3.66492	74.4567		11.6652	75.4707		4.66546	97.1879		12.6652	66.2732		5.66564	75.8882		13.6648	69.8788		6.6655	69.4493		14.6655	89.75		7.66359	73.6157		15.6655	78.9689
0.666116	186.804		8.66696	145.335		1.66532	89.4041		9.6663	76.2997		2.66544	72.214		10.6658	58.1523		3.66665	78.5753		11.6661	70.5767		4.66726	89.3086		12.6662	67.9284		5.66696	72.035		13.6662	64.6568		6.66647	68.7306		14.6666	88.4676		7.66526	78.5663		15.6665	83.3619
0.667227	199.917		8.6687	144.35		1.66699	93.0336		9.66727	74.8235		2.66717	68.996		10.6669	69.1869		3.66825	73.222		11.6675	71.1493		4.66872	82.5328		12.6678	69.4613		5.66877	70.3858		13.668	68.4771		6.66758	80.5973		14.6676	83.8898		7.66692	73.6842		15.668	79.4312
0.669033	193.872		8.66988	117.02		1.6681	82.2107		9.66838	77.7104		2.66856	84.1492		10.6685	65.4739		3.66929	74.8116		11.6694	76.8366		4.66962	84.8978		12.6695	68.6471		5.67022	69.7476		13.6693	72.5301		6.66932	84.689		14.6691	86.5112		7.66797	73.386		15.6697	79.1866
0.67063	176.342		8.67078	133.22		1.66907	90.4986		9.67012	83.8152		2.66946	80.2364		10.6702	58.5847		3.67033	90.761		11.6707	65.5574		4.67087	84.2059		12.6707	83.1919		5.67113	67.5108		13.6702	70.8093		6.67099	77.5404		14.6709	92.3804		7.66894	69.0825		15.671	69.3509
0.671463	191.432		8.67238	130.596		1.6706	105.189		9.67171	77.9877		2.67078	73.8274		10.6714	67.9999		3.67207	78.8437		11.6715	73.8244		4.67268	85.4227		12.6716	83.1591		5.67238	73.723		13.6715	75.6496		6.67189	76.0343		14.6721	99.6901		7.67061	80.6181		15.6719	69.4255
0.672435	175.611		8.67418	131.723		1.67234	90.5045		9.67275	82.7714		2.67259	75.6436		10.6723	69.4195		3.67374	69.4493		11.6729	64.7015		4.67414	78.5842		12.6732	74.239		5.67418	78.0146		13.6734	66.646		6.67279	70.2546		14.673	95.1898		7.67234	87.7906		15.6733	75.4289
0.674102	170.231		8.67529	133.34		1.67352	81.0744		9.6738	98.6523		2.67405	89.8633		10.6738	67.7435		3.67464	73.1146		11.6748	73.72		4.67497	96.6779		12.675	72.6613		5.67564	81.3786		13.6748	70.8838		6.67439	69.0915		14.6745	73.1772		7.67345	80.7613		15.6752	83.4692
0.675699	174.687		8.67613	140.897		1.67449	91.5155		9.67546	85.4644		2.67495	79.3119		10.6755	69.7774		3.67561	77.6209		11.6761	79.5505		4.67608	92.5713		12.676	71.3819		5.67647	80.4213		13.6756	76.0105		6.67605	74.9637		14.6763	90.1974		7.67436	61.2808		15.6764	77.4778
0.676741	181.385		8.67752	133.739		1.67602	98.4017		9.6772	73.4725		2.6762	72.8522		10.6768	66.0346		3.67721	77.4658		11.6769	82.16		4.67775	82.8608		12.6769	74.6028		5.67758	80.6778		13.6767	71.9545		6.67717	79.8666		14.6776	94.2503		7.67595	72.4078		15.6772	79.8905
0.677783	184.242		8.67918	125.019		1.67782	84.5578		9.6781	84.1731		2.67801	66.8905		10.6777	67.3468		3.67881	77.7492		11.6781	89.7977		4.67928	81.9453		12.6783	68.8529		5.67925	77.5404		13.6784	71.7726		6.67814	68.835		14.6783	93.3825		7.67776	68.5189		15.6784	78.9659
0.67931	186.341		8.6805	142.615		1.67894	87.8383		9.679	76.422		2.67946	70.851		10.6792	80.6003		3.67992	73.9884		11.6798	69.2167		4.68032	86.0668		12.68	70.6482		5.68078	84.6652		13.6799	72.3183		6.67967	74.8712		14.6796	77.606		7.67887	67.3766		15.6802	73.7707
0.681046	180.481		8.68141	154.437		1.67977	97.9246		9.68053	76.3832		2.6803	76.7352		10.681	86.4038		3.68089	79.971		11.6812	66.8398		4.68136	98.1333		12.6812	77.0334		5.68175	76.252		13.6808	66.6311		6.6814	74.1554		14.6814	80.3527		7.67963	67.0903		15.6816	82.5745
0.682227	177.284		8.68272	137.375		1.68116	88.4109		9.6822	76.0761		2.68141	81.656		10.6822	73.392		3.68242	72.9715		11.6822	74.8682		4.68296	89.5592		12.6822	72.3333		5.68286	70.353		13.682	60.9855		6.68272	75.3931		14.6827	77.5762		7.68109	71.2835		15.6825	79.7741
0.68313	186.303		8.68446	133.528		1.68282	96.6929		9.68331	76.085		2.68308	79.0435		10.683	78.6409		3.68415	66.1748		11.6834	70.7288		4.68469	83.7794		12.6835	72.208		5.68446	77.4211		13.6837	59.6107		6.68362	76.592		14.6837	95.3449		7.68283	76.5443		15.6837	70.696
0.684588	189.673		8.68599	137.551		1.68414	76.4876		9.68428	73.8841		2.6846	72.8313		10.6844	83.854		3.6854	66.5654		11.685	75.1038		4.68587	78.9689		12.6853	90.9489		5.6862	74.8921		13.6853	67.1321		6.68501	68.7992		14.6849	84.4803		7.68408	75.5661		15.6855	72.4913
0.686394	178.537		8.68689	142.123		1.68505	95.7475		9.68574	80.0426		2.68565	73.225		10.686	79.2224		3.68638	65.1995		11.6866	70.0339		4.68685	83.7198		12.6868	74.743		5.68731	74.1048		13.6863	72.4854		6.68682	64.5404		14.6866	81.0536		7.68505	78.8138		15.6871	65.626
0.687713	178.417		8.68807	163.789		1.68637	91.7005		9.68755	77.8356		2.68669	91.4261		10.6874	76.5234		3.68769	65.6737		11.6877	72.9595		4.6883	92.8367		12.6877	68.5636		5.68828	82.7952		13.6874	69.2853		6.68814	80.9462		14.6882	82.5089		7.68637	74.9875		15.688	78.4679
0.688616	182.485		8.68981	164.8		1.68817	82.9145		9.68887	68.4861		2.68828	73.1355		10.6883	66.0346		3.6895	70.6542		11.6887	67.4363		4.69011	81.8319		12.6889	66.2225		5.68981	74.4596		13.689	75.4528		6.68904	72.2289		14.6892	81.7276		7.68817	68.841		15.6891	75.3543
0.690005	195.936		8.69141	138.764		1.68963	78.4739		9.68977	69.1422		2.69002	67.1977		10.6896	71.8501		3.69089	70.4753		11.6904	68.5218		4.69136	91.0921		12.6906	75.4229		5.69161	74.9517		13.6908	77.7909		6.69043	70.6632		14.6903	74.7102		7.68956	73.4248		15.6908	76.7799
0.69181	176.014		8.69238	157.353		1.69053	78.9033		9.69109	78.611		2.69113	70.8212		10.6913	71.5578		3.69179	68.5457		11.6921	71.2477		4.69226	92.0941		12.6922	66.643		5.69279	70.6989		13.6919	69.5746		6.69231	79.3417		14.692	83.9405		7.69054	84.9425		15.6925	72.7239
0.69313	172.211		8.69349	164.579		1.69171	90.1705		9.69289	72.3124		2.6921	76.1834		10.6928	67.1559		3.69311	64.2273		11.6931	81.0058		4.69379	103.012		12.6932	59.4914		5.6937	71.3133		13.6928	70.5528		6.69362	75.8971		14.6937	88.3125		7.69172	74.0093		15.6936	80.1559
0.693894	185.736		8.69522	137.953		1.69345	87.2717		9.69435	82.0318		2.69356	68.504		10.6938	73.3771		3.69499	81.1609		11.6941	81.8737		4.6956	99.6304		12.6943	61.6446		5.69522	74.394		13.6944	76.0373		6.69446	76.3147		14.6947	87.397		7.69345	69.4106		15.6946	78.8645
0.695144	183.905		8.69689	140.831		1.69505	88.2648		9.69526	81.9065		2.69537	66.5088		10.6949	62.1188		3.69638	83.9076		11.6957	75.3543		4.69678	98.4077		12.696	72.4824		5.69703	84.8053		13.6962	78.7273		6.69564	67.9045		14.6957	89.5323		7.69498	68.9513		15.6962	74.057
0.69681	178.17		8.69779	147.273		1.69602	87.0749		9.6965	78.5037		2.69655	76.771		10.6967	70.8481		3.69714	76.4697		11.6975	69.4971		4.69754	90.2153		12.6976	72.7299		5.69821	80.3408		13.6973	73.0401		6.69737	74.5909		14.6974	87.7459		7.69595	65.9153		15.698	78.948
0.698269	199.094		8.6987	154.317		1.69713	89.9618		9.69831	81.0595		2.69745	81.3727		10.6983	77.2481		3.69832	81.3488		11.6985	68.5129		4.69893	100.245		12.6985	62.1934		5.69897	78.0384		13.6981	63.0463		6.69883	78.2204		14.6991	86.1146		7.69706	72.7448		15.6989	76.1745
0.699241	189.395		8.70029	155.078		1.69887	87.5759		9.69977	67.4512		2.69898	74.7817		10.6993	59.1096		3.69999	62.1784		11.6994	72.6613		4.7006	95.7057		12.6995	56.4226		5.70036	73.9646		13.6995	72.2527		6.6998	69.6909		14.7001	77.0036		7.69887	60.4069		15.6998	74.0362
0.700352	189.324		8.70189	133.525		1.70046	88.1038		9.70053	68.6262		2.70078	70.4365		10.7003	66.8607		3.70145	71.528		11.7008	68.2594		4.70192	94.5754		12.7011	61.746		5.7021	70.517		13.7012	82.8787		6.70099	71.5042		14.701	75.587		7.70047	73.049		15.7014	76.4578
0.702088	183.639		8.703	145.424		1.70137	82.8519		9.70164	74.9189		2.70203	67.4363		10.7021	66.5863		3.70242	77.2034		11.7025	73.4158		4.70282	97.1372		12.7027	71.03		5.70342	74.7877		13.7024	74.5849		6.70265	72.6941		14.7025	84.7785		7.7013	68.7873		15.703	74.4
0.703685	192.998		8.70397	160.103		1.70234	89.3444		9.70331	79.4342		2.7028	64.9281		10.7037	65.7304		3.7036	82.6431		11.7037	69.5746		4.70414	88.408		12.7037	68.5487		5.70432	63.3535		13.7034	71.0002		6.70432	70.2307		14.7041	75.6406		7.70227	64.4152		15.7041	71.4117
0.704727	187.37		8.7055	151.848		1.70394	90.1586		9.70484	75.0651		2.70412	69.846		10.7046	72.3959		3.70526	79.5505		11.7046	63.1865		4.70587	93.5853		12.7048	59.6435		5.70564	78.6498		13.7048	63.3982		6.70536	80.4988		14.7053	79.4729		7.70394	74.4298		15.7052	79.7533
0.705769	190.186		8.70731	150.062		1.70553	92.0404		9.70581	71.0359		2.70578	75.3931		10.7055	72.9059		3.70693	68.8767		11.7061	78.8645		4.7074	92.2373		12.7063	61.6953		5.70738	74.7131		13.7065	61.3673		6.7064	71.1105		14.7063	87.895		7.70554	70.3619		15.7066	72.1155
0.707435	178.573		8.70856	131.476		1.70664	92.4132		9.70692	73.2965		2.7071	72.8223		10.7071	72.0917		3.70797	78.9779		11.7078	72.2647		4.70837	90.937		12.708	63.6517		5.7089	67.6093		13.7079	73.1027		6.708	70.5886		14.7077	83.3231		7.70658	70.687		15.7084	68.3847
0.709102	192.956		8.70953	144.237		1.70762	80.1261		9.70852	68.7545		2.70808	78.2621		10.7087	75.4647		3.70894	77.9728		11.7092	68.7067		4.70948	89.2102		12.7093	66.4074		5.70988	76.1476		13.7089	75.6794		6.70973	75.8375		14.7095	76.5115		7.70762	69.3211		15.7097	80.5197
0.710144	202.029		8.71085	155.856		1.70914	85.3899		9.71025	81.3876		2.70933	72.2318		10.7099	68.5308		3.71054	80.8955		11.7102	65.802		4.71122	97.9723		12.7102	75.4826		5.71099	76.3176		13.7101	73.6634		6.71085	69.5925		14.7109	82.8012		7.70922	81.8111		15.7106	74.9487
0.711116	188.748		8.71266	148.806		1.71088	90.3495		9.71137	95.2763		2.71106	79.3089		10.7108	66.4133		3.71228	84.8262		11.7114	75.9329		4.71282	96.6064		12.7117	70.6632		5.71272	67.9194		13.7119	73.6276		6.71182	73.4665		14.7118	86.3979		7.71095	79.6906		15.7119	72.8522
0.712783	177.463		8.71404	137.33		1.7122	102.234		9.71234	83.8927		2.71259	77.1974		10.7123	71.8561		3.71346	77.5911		11.7131	73.1564		4.71386	87.6564		12.7135	60.3831		5.71432	63.1507		13.7134	69.8371		6.71342	76.088		14.713	92.5176		7.71213	65.2562		15.7137	78.8824
0.714519	158.332		8.71495	145.373		1.7131	101.981		9.71387	68.5308		2.71356	81.3011		10.7141	65.4411		3.71443	70.8749		11.7146	66.6579		4.7149	86.9168		12.7148	62.2977		5.71536	60.8274		13.7144	72.4555		6.71522	67.9582		14.7148	94.1698		7.71304	71.4296		15.7152	70.1711
0.71556	169.038		8.71627	140.062		1.71449	87.6803		9.71567	70.0756		2.71467	78.5305		10.7153	57.5439		3.71596	67.0933		11.7156	68.322		4.71664	88.8225		12.7156	66.7682		5.7164	67.5019		13.7155	72.1126		6.71626	65.6409		14.7163	99.0429		7.71449	76.7948		15.7161	77.1229
0.716394	170.774		8.71814	156.784		1.71623	86.9765		9.71685	80.2215		2.71641	83.681		10.7163	63.5265		3.71776	70.4991		11.7168	71.8143		4.7183	88.739		12.717	63.8187		5.71814	66.9054		13.7173	69.7893		6.71703	67.5317		14.7172	95.8847		7.7163	76.2729		15.7173	64.6269
0.717921	163.694		8.71953	148.034		1.71755	93.964		9.71776	80.5973		2.71801	65.6111		10.7176	78.8347		3.71888	66.1658		11.7186	77.9549		4.71928	97.4534		12.7189	68.3519		5.71981	69.7416		13.7189	72.4227		6.71848	62.8882		14.7185	88.9508		7.71762	78.3575		15.7191	73.6157
0.719588	179.372		8.72029	136.107		1.71845	85.0379		9.71928	69.7446		2.71905	65.4172		10.7194	73.2876		3.71971	68.7187		11.7201	70.9942		4.72018	96.9971		12.7202	70.3828		5.72071	80.7434		13.7197	59.9357		6.72022	59.3751		14.7203	90.4419		7.71852	74.0302		15.7206	76.9409
0.720769	171.257		8.72147	139.236		1.71984	94.3309		9.72116	79.9173		2.72009	75.9657		10.7208	62.3216		3.7211	77.9788		11.7209	71.6175		4.72178	108.035		12.721	69.7028		5.72161	80.4362		13.7208	63.7084		6.7214	70.0816		14.7218	83.6661		7.71991	69.2943		15.7214	68.7873
0.721741	176.193		8.72321	155.647		1.72171	102.971		9.72227	89.4786		2.72183	71.8143		10.7217	77.1467		3.72283	67.4422		11.722	88.8881		4.72337	97.8023		12.7222	80.0127		5.72321	68.7724		13.7224	70.9375		6.72237	70.3202		14.7226	78.286		7.72179	79.0465		15.7225	67.3319
0.72313	182.882		8.72467	129.961		1.72303	86.9138		9.7231	82.1779		2.72349	72.1305		10.723	66.8607		3.72401	81.7962		11.7237	78.7214		4.72448	102.762		12.7239	68.1043		5.72488	74.8921		13.724	68.3548		6.72376	75.1903		14.7237	83.2635		7.7231	81.2414		15.7242	66.4402
0.724935	193.177		8.72557	131.804		1.72387	91.6229		9.72442	86.1086		2.72446	70.4991		10.7249	55.6203		3.72499	82.0944		11.7253	72.6792		4.72546	89.2967		12.7253	73.4904		5.72599	70.2695		13.7251	80.1231		6.72557	71.9098		14.7253	89.3146		7.72387	73.4993		15.7257	72.4376
0.726324	194.928		8.72675	151.636		1.72505	92.7651		9.72616	79.13		2.72537	73.0878		10.7263	69.3539		3.72631	62.6646		11.7262	73.2786		4.72692	92.6667		12.7263	72.879		5.72696	70.3083		13.726	81.9751		6.72696	75.0651		14.7269	84.0866		7.72512	68.996		15.7268	79.9978
0.727227	179.169		8.72842	151.269		1.72671	94.7096		9.72748	77.7432		2.7269	66.9472		10.7271	68.4861		3.72811	73.6664		11.7273	57.2636		4.72872	91.0712		12.7275	75.6526		5.72842	72.3482		13.7276	70.2247		6.72793	74.2032		14.7278	81.1401		7.72685	74.1554		15.7278	83.7347
0.728477	180.398		8.73009	154.699		1.72817	82.2077		9.72838	71.1433		2.72856	71.1642		10.7282	73.6992		3.72957	76.1924		11.7289	68.1729		4.73004	84.6204		12.7292	68.659		5.73022	72.8283		13.7293	60.4129		6.72911	74.8384		14.7289	79.3298		7.72824	68.331		15.7294	84.5608
0.730282	185.39		8.73113	151.386		1.72914	76.5264		9.7297	68.4055		2.72974	69.2495		10.7299	66.2225		3.73047	79.1329		11.7306	78.4649		4.73094	86.887		12.7308	67.645		5.73154	66.5654		13.7306	71.6771		6.73085	75.0472		14.7306	93.3616		7.72922	69.4076		15.7311	71.1791
0.731741	186.401		8.73217	131.854		1.73032	82.6998		9.73144	84.2953		2.73071	76.8306		10.7314	59.7747		3.73165	88.4378		11.7318	73.0043		4.73226	84.5011		12.7318	69.6223		5.73245	72.0052		13.7315	78.3695		6.73237	67.6868		14.7323	72.2766		7.7304	74.1614		15.7323	71.7308
0.732644	182.873		8.7337	132.904		1.73199	91.5663		9.73296	86.7677		2.73217	82.67		10.7324	61.746		3.73346	71.5757		11.7328	69.4404		4.73407	90.9161		12.7328	74.4298		5.73383	63.0731		13.7329	65.8109		6.73335	64.7582		14.7334	85.2497		7.73213	64.7015		15.7333	80.642
0.733894	182.739		8.73543	141.338		1.73366	90.5045		9.73387	80.985		2.73391	83.4394		10.7335	62.5363		3.73499	77.1944		11.7342	70.8689		4.73553	81.8051		12.7345	78.9719		5.73564	69.5597		13.7347	61.9727		6.73453	68.7724		14.7344	96.4543		7.73373	67.827		15.7348	76.0462
0.735699	202.691		8.73661	146.328		1.7347	78.9391		9.73505	77.1974		2.73523	80.4601		10.7351	78.8288		3.73596	75.3394		11.736	65.0027		4.73643	86.0907		12.7362	70.1144		5.73703	76.6815		13.736	66.6996		6.73626	68.0238		14.7359	86.723		7.73477	68.8081		15.7366	73.887
0.737227	185.647		8.73752	138.126		1.73574	77.9162		9.73678	78.5723		2.73613	84.531		10.7368	84.9365		3.73707	69.1362		11.7373	60.6187		4.73768	103.045		12.7373	65.8348		5.73793	75.1396		13.7369	65.9988		6.73786	71.9187		14.7377	80.1469		7.73581	68.1908		15.7378	84.0836
0.73806	197.006		8.73911	144.058		1.73734	89.1744		9.73838	76.8127		2.73752	81.3339		10.7379	75.1307		3.73888	72.5927		11.7382	62.2411		4.73955	107.999		12.7383	65.0713		5.73925	73.5262		13.7383	76.6338		6.73876	65.96		14.7389	73.5799		7.73748	66.3477		15.7387	78.8884
0.739102	193.75		8.74092	152.784		1.73907	84.8083		9.73935	93.6569		2.73933	83.9524		10.739	69.3837		3.74047	67.9224		11.7396	64.8327		4.74094	92.5474		12.7398	67.0068		5.74106	71.865		13.7402	75.3066		6.73974	68.3697		14.7398	84.519		7.73922	61.5223		15.7402	83.1949
0.740769	179.085		8.74203	142.543		1.74019	88.0292		9.74046	83.9345		2.74071	78.79		10.7405	84.3371		3.74138	77.1944		11.7415	73.1772		4.74171	91.0503		12.7417	63.9589		5.74245	72.8999		13.7415	67.0575		6.7414	74.3314		14.7413	84.7457		7.74026	67.2514		15.742	80.6241
0.742296	169.754		8.74279	137.694		1.74116	81.9542		9.7422	75.7361		2.74162	74.6565		10.7422	70.5439		3.74235	70.6632		11.7428	82.7863		4.74289	84.2924		12.7427	72.8104		5.74328	72.7359		13.7422	66.0048		6.74293	74.2897		14.7431	86.6335		7.74123	76.5115		15.7432	89.8872
0.743269	175.686		8.74425	122.794		1.74275	92.3387		9.74387	66.6251		2.74287	76.9678		10.7434	77.9341		3.74395	74.564		11.7434	68.152		4.74455	83.2098		12.7435	71.0658		5.74439	70.8421		13.7435	65.9749		6.74404	74.3404		14.7443	92.6488		7.7429	75.8763		15.744	87.8264
0.74431	180.431		8.74599	127.778		1.74449	86.4426		9.74477	66.4432		2.74467	75.9866		10.7444	77.9042		3.74554	84.4892		11.7448	77.1079		4.74601	89.3235		12.745	74.4626		5.74606	60.1654		13.7453	79.4342		6.74508	75.077		14.7451	84.1462		7.7447	70.5379		15.7453	72.3333
0.745907	169.649		8.74724	134.524		1.7456	85.023		9.74567	69.6879		2.74613	67.0724		10.7459	64.9371		3.74665	79.6191		11.7465	72.3929		4.74705	93.9283		12.7467	62.9002		5.74752	70.8361		13.7466	68.2027		6.74661	66.4611		14.7464	88.8941		7.74574	66.1479		15.7471	81.1401
0.747644	169.187		8.74821	132.314		1.74637	92.7234		9.74727	75.1277		2.74696	72.0261		10.7477	67.147		3.74763	77.3883		11.7478	62.8644		4.74817	78.0026		12.7479	58.7637		5.74856	75.3096		13.7476	68.4801		6.74842	72.9953		14.7482	87.7936		7.74658	66.7981		15.7484	82.3091
0.748824	177.761		8.74953	141.04		1.74782	91.5961		9.74887	88.3364		2.74808	74.0153		10.7488	76.8455		3.74915	85.4107		11.7488	59.1305		4.74983	73.9616		12.7489	78.277		5.74967	71.3938		13.7487	71.1135		6.7496	68.4801		14.7495	74.0153		7.74804	77.2153		15.7493	77.5672
0.749797	184.37		8.75127	144.082		1.74956	96.2455		9.74998	95.7892		2.74974	70.1293		10.7496	69.172		3.75096	77.9698		11.75	69.8221		4.7515	88.0173		12.7503	76.8545		5.75133	78.2233		13.7504	68.1073		6.7505	74.4209		14.7504	77.779		7.74977	84.191		15.7506	83.1084
0.751255	192.458		8.75272	141.899		1.75074	89.3176		9.75095	82.2465		2.75127	73.7499		10.751	71.8292		3.75214	82.4224		11.7518	71.3521		4.75261	96.7972		12.752	74.0511		5.753	83.1322		13.752	69.6969		6.75196	78.2412		14.7517	76.8843		7.75095	79.0763		15.7523	78.447
0.75306	193.269		8.7537	147.795		1.75171	85.7328		9.75248	72.876		2.75224	85.8193		10.7527	71.6473		3.75304	66.9323		11.7534	77.7581		4.75358	101.861		12.7534	71.2835		5.75411	72.6136		13.753	77.2243		6.75383	73.8721		14.7535	83.4782		7.75192	68.8439		15.7539	77.5881
0.75431	191.531		8.75488	147.398		1.7531	90.6805		9.75428	74.1256		2.75335	84.191		10.754	78.6886		3.7545	70.8123		11.7544	68.3489		4.75518	98.6851		12.7544	76.9797		5.75508	75.8315		13.7542	72.2706		6.75508	78.5603		14.7549	101.679		7.75331	61.6237		15.7548	81.155
0.755213	200.403		8.75668	133.533		1.75484	83.0965		9.75553	73.2965		2.75502	86.0818		10.7549	72.9685		3.75631	82.4612		11.7554	76.7053		4.75692	88.9508		12.7555	68.6053		5.75668	81.0655		13.7558	72.2527		6.75598	71.7666		14.7559	87.9099		7.75505	62.7182		15.7559	75.9419
0.756741	185.685		8.75821	132.481		1.7563	76.3534		9.75644	83.4961		2.75669	76.7829		10.7562	70.0607		3.75763	86.6961		11.7571	80.0068		4.75803	87.0451		12.7573	63.9112		5.75842	78.0146		13.7575	71.1254		6.75737	62.0502		14.7571	83.0398		7.75644	62.4618		15.7577	71.4117
0.758546	184.537		8.75918	138.997		1.75727	83.1829		9.75782	82.7237		2.75773	76.7352		10.758	78.8765		3.75853	73.1474		11.7588	69.008		4.759	102.013		12.7588	66.7444		5.7596	71.7219		13.7586	68.2385		6.75925	60.2041		14.7588	72.4168		7.75741	78.5663		15.7593	73.0609
0.759727	169.259		8.76029	151.32		1.75845	87.0987		9.75963	77.1318		2.75877	81.2892		10.7594	70.8779		3.75992	65.9779		11.7598	68.1312		4.76053	93.0604		12.7598	63.27		5.76057	67.7942		13.7596	63.2223		6.7605	61.7192		14.7604	79.6936		7.75866	77.1944		15.7604	79.3178
0.76056	182.518		8.7621	149.862		1.76019	85.2258		9.76102	67.5466		2.7603	75.6257		10.7604	72.3899		3.76179	65.7483		11.7608	66.5118		4.7624	95.7743		12.761	57.2248		5.7621	67.323		13.7612	69.6581		6.76133	70.4186		14.7614	87.4954		7.76047	68.3071		15.7614	71.5459
0.76181	182.098		8.76363	138.177		1.76171	90.43		9.76192	85.6374		2.76203	64.1766		10.7616	66.7235		3.76304	63.6786		11.7625	69.3599		4.76351	96.6839		12.7627	64.8625		5.7639	72.0947		13.7629	76.5473		6.76258	71.6622		14.7625	86.7468		7.76192	71.4147		15.7631	66.7712
0.763546	174.913		8.76453	136.662		1.76269	85.3213		9.76324	88.0024		2.76321	71.1642		10.7633	66.3716		3.76381	71.0121		11.7642	66.9919		4.76428	99.6424		12.7643	64.2303		5.76502	74.4895		13.764	73.1832		6.76432	85.8551		14.7642	84.1432		7.76283	75.6884		15.7648	70.2486
0.764866	173.875		8.7655	134.568		1.7638	85.697		9.76505	86.0191		2.76419	80.8866		10.7649	71.0658		3.76506	66.3746		11.7652	63.8515		4.76567	92.3685		12.7652	63.8277		5.76585	64.0364		13.7649	68.2117		6.76571	86.1354		14.7659	84.4057		7.76408	72.1573		15.7657	65.6558
0.765838	181.221		8.7671	124.205		1.7656	87.1196		9.76644	75.5929		2.76571	76.1238		10.766	66.3418		3.76679	68.6203		11.766	65.5127		4.7674	85.53		12.7662	66.7056		5.76724	62.927		13.7663	73.1325		6.76668	77.0543		14.7668	75.1008		7.76588	73.9407		15.7666	61.7132
0.767088	169.566		8.7687	115.27		1.7672	85.6821		9.76727	71.358		2.76752	71.8949		10.767	65.5515		3.76818	81.8856		11.7675	60.0968		4.76865	81.8558		12.7678	72.2259		5.7689	67.7285		13.768	73.1355		6.76786	67.654		14.7677	94.1519		7.76741	75.1843		15.7682	68.3668
0.768824	165.865		8.76981	125.365		1.76803	97.7933		9.76845	67.8777		2.76863	71.1135		10.7687	73.5799		3.76915	84.8262		11.7692	67.5019		4.76962	85.6791		12.7694	65.0683		5.77015	71.9157		13.7692	71.1224		6.7696	73.5053		14.7693	84.7367		7.76824	69.2555		15.7698	79.3894
0.770422	183.571		8.77085	133.027		1.769	88.6138		9.77012	77.943		2.7694	73.8393		10.7704	76.419		3.77033	74.1077		11.7704	68.0834		4.77094	95.8668		12.7704	59.1156		5.77113	75.6228		13.7701	67.5019		6.77119	66.2344		14.771	73.0878		7.76929	71.9127		15.771	78.7781
0.771394	188.805		8.77238	145.839		1.77067	84.8023		9.77157	69.2883		2.77078	84.9813		10.7713	63.4638		3.772	72.6046		11.7714	74.236		4.77268	98.8491		12.7714	74.9517		5.77245	78.5156		13.7715	81.0208		6.77223	77.5702		14.7721	83.5736		7.77095	73.9049		15.772	72.7896
0.772435	189.586		8.77411	145.767		1.77227	91.0652		9.77255	70.3411		2.77252	85.4853		10.7722	66.1211		3.7736	79.8964		11.7728	68.5696		4.77414	93.0992		12.773	64.8267		5.77418	61.3523		13.7733	74.7221		6.77328	75.1277		14.773	86.2786		7.77248	78.4798		15.7734	74.576
0.774171	181.928		8.77529	143.357		1.77331	86.5768		9.77366	76.0403		2.77384	81.1609		10.7737	64.5285		3.77464	74.8652		11.7746	71.361		4.77511	89.4518		12.7748	69.6104		5.77571	67.4005		13.7747	59.9864		6.77494	59.3393		14.7746	86.2428		7.77352	72.1812		15.7752	84.2506
0.775838	168.77		8.77627	137.22		1.77435	80.8537		9.77532	76.9797		2.77474	73.7976		10.7754	62.6497		3.77575	78.5812		11.7759	73.8095		4.77629	92.2581		12.776	67.6093		5.77668	73.8185		13.7756	69.9176		6.77668	66.1121		14.7763	95.5059		7.77456	69.9921		15.7765	83.4036
0.77681	164.964		8.77773	131.52		1.77588	86.0042		9.77699	76.5652		2.77606	67.49		10.7765	70.3619		3.77735	86.5888		11.7769	77.3913		4.77803	87.9487		12.7769	66.0525		5.77779	71.3103		13.7769	79.4699		6.77772	62.0323		14.7776	87.9308		7.77616	72.6762		15.7774	66.4879
0.777852	172.924		8.77953	155.412		1.77769	98.4972		9.7781	72.4347		2.77787	62.9061		10.7775	71.4087		3.77908	73.389		11.7782	65.6707		4.77962	84.4057		12.7784	74.4537		5.7796	68.3668		13.7787	73.8334		6.77869	63.1775		14.7785	84.0776		7.7779	69.4493		15.7788	67.8329
0.779519	184.358		8.78078	149.659		1.77887	93.3378		9.77907	76.935		2.77933	76.3415		10.779	71.194		3.78019	65.3665		11.78	68.665		4.7806	85.4316		12.7801	72.4227		5.7812	68.319		13.7801	71.4684		6.78036	69.7804		14.7798	93.1379		7.77908	66.3567		15.7806	70.8868
0.781255	193.606		8.78175	139.781		1.77977	93.2035		9.7806	74.9309		2.7803	79.4312		10.7808	66.133		3.78117	71.7159		11.7814	79.7801		4.78171	89.3206		12.7814	64.0991		5.78217	74.743		13.781	58.9068		6.7821	73.4099		14.7816	78.8288		7.77998	68.9722		15.7821	75.8733
0.782227	170.762		8.78314	132.934		1.78123	88.5213		9.78241	76.1059		2.78148	82.9533		10.7821	67.2096		3.78276	69.7714		11.7823	70.2635		4.78344	97.9365		12.7823	67.4005		5.78328	74.1704		13.7823	71.4624		6.78307	75.6287		14.783	82.4433		7.78151	69.0259		15.7829	80.5436
0.78306	170.267		8.78495	119.842		1.78303	85.0946		9.78359	78.5126		2.78321	80.135		10.783	65.9213		3.78457	73.1564		11.7836	56.2078		4.78511	89.9737		12.7837	72.1394		5.78502	73.395		13.7841	65.5992		6.78397	77.4599		14.7839	77.2392		7.78331	67.824		15.7842	76.0254
0.784588	167.881		8.78627	131.878		1.78435	81.0595		9.78449	78.4261		2.78481	77.5195		10.7844	66.0793		3.78561	65.6111		11.7854	67.648		4.78601	82.837		12.7856	67.2931		5.78661	65.6886		13.7856	69.3569		6.78543	69.9713		14.7853	69.3629		7.78449	63.61		15.786	68.6918
0.786255	183.449		8.78703	131.219		1.78519	83.1233		9.78609	71.358		2.78578	75.0173		10.7862	70.1383		3.78645	77.105		11.7869	79.4342		4.78692	85.4734		12.7869	72.8104		5.78752	65.5246		13.7865	71.5877		6.7871	65.7393		14.7871	77.1378		7.7854	62.8703		15.7875	72.6583
0.787435	174.848		8.78828	138.812		1.78664	82.497		9.78789	79.0256		2.78683	72.9864		10.7875	63.0433		3.7879	68.8141		11.7876	75.1486		4.78851	87.9785		12.7876	65.2264		5.78849	68.2206		13.7875	60.3294		6.78828	75.3394		14.7885	90.9012		7.78692	74.0063		15.7882	78.2979
0.788408	174.567		8.79002	133.996		1.78845	81.9333		9.78901	75.6108		2.78856	74.5819		10.7884	76.8813		3.78957	75.6377		11.7887	70.9554		4.79011	97.8798		12.7889	63.7412		5.79009	75.8941		13.7892	62.0979		6.78925	75.5691		14.7893	87.6206		7.78873	74.1853		15.7893	79.7443
0.789866	191.098		8.79141	122.424		1.78977	87.9338		9.78977	65.7751		2.79023	76.3803		10.7898	73.386		3.79075	78.2263		11.7904	63.8545		4.79122	86.89		12.7906	67.6928		5.79168	72.2975		13.7908	60.2727		6.79071	67.484		14.7904	80.2722		7.78991	68.4354		15.7911	67.3528
0.791602	198.345		8.79238	133.313		1.79053	91.9748		9.79116	73.3472		2.79113	67.4243		10.7916	68.8618		3.79172	75.9717		11.7919	60.5382		4.79219	84.8948		12.792	67.2961		5.79279	71.7457		13.7917	59.3393		6.79244	68.826		14.7921	85.4614		7.79074	73.058		15.7925	63.8008
0.792991	186.452		8.79363	136.704		1.79178	91.8376		9.79289	75.9717		2.7921	64.8297		10.7929	75.8166		3.79311	73.6574		11.7929	55.4652		4.79372	95.3508		12.793	66.479		5.79377	70.7049		13.7928	59.4705		6.79383	74.224		14.7936	88.8344		7.79199	60.5054		15.7936	68.5994
0.793894	175.799		8.79529	127.441		1.79345	81.2057		9.79414	70.7526		2.7937	74.7668		10.7937	69.8281		3.79485	74.6535		11.794	66.4968		4.79553	107.033		12.7942	69.7178		5.79529	84.2745		13.7944	56.0021		6.7948	74.9219		14.7946	88.5571		7.79373	66.2284		15.7947	65.1936
0.795144	177.344		8.79689	132.809		1.79491	94.0654		9.79512	72.8462		2.7953	80.141		10.7949	68.5308		3.79624	70.5111		11.7957	77.0692		4.79678	100.561		12.7959	63.8605		5.7971	74.9309		13.7962	62.3276		6.79605	74.1495		14.7957	82.5328		7.79505	70.1055		15.7963	73.1265
0.796949	161.624		8.79793	136.462		1.79588	96.165		9.79644	76.598		2.79641	74.0063		10.7966	75.4796		3.79721	77.5225		11.7974	64.0006		4.79768	93.8984		12.7975	66.7653		5.79842	72.9595		13.7973	65.1071		6.79779	69.4136		14.7973	80.0962		7.79602	76.6427		15.798	81.6142
0.798408	165.024		8.79897	134.052		1.79706	98.0439		9.79817	73.4099		2.79738	79.6012		10.798	65.3964		3.79846	85.6523		11.7985	60.3771		4.79907	86.6186		12.7985	71.4415		5.79932	74.406		13.7982	69.0825		6.79932	62.9419		14.799	75.578		7.79727	64.7283		15.7991	79.5982
0.79931	161.687		8.80057	125.272		1.79873	96.8539		9.7997	70.353		2.79891	82.9891		10.799	69.7714		3.80019	79.0673		11.7994	72.5808		4.80087	92.3297		12.7996	69.0825		5.80071	70.0995		13.7997	69.9653		6.80022	66.5535		14.8001	80.4213		7.79901	65.8616		15.8001	79.1389
0.80056	170.893		8.80231	118.586		1.80032	95.7773		9.8006	86.9287		2.80065	81.656		10.8001	69.7058		3.80172	75.3335		11.8009	82.7296		4.80219	89.9349		12.8012	63.1924		5.80252	65.5693		13.8015	67.6122		6.80147	66.139		14.8011	71.9455		7.8006	74.4507		15.8017	79.8189
0.802366	164.308		8.80335	131.461		1.80137	97.4832		9.80178	87.3045		2.8019	73.6544		10.8019	61.8802		3.80263	65.4829		11.8028	77.6806		4.8031	97.9902		12.8029	67.0217		5.80383	71.1105		13.8027	68.7604		6.80328	58.7726		14.8027	71.8889		7.80158	76.5741		15.8034	75.9538
0.803824	167.425		8.80432	120.838		1.80241	94.3219		9.80352	88.1425		2.8028	75.1993		10.8035	67.6003		3.80381	64.3376		11.8039	70.0727		4.80449	102.377		12.8039	76.9618		5.80474	74.4596		13.8036	71.7905		6.80474	62.25		14.8044	73.4367		7.80269	75.6317		15.8046	66.7503
0.804658	169.381		8.80599	117.447		1.80407	104.736		9.80512	86.1712		2.80419	56.9683		10.8046	67.5168		3.80561	66.0346		11.8048	67.2365		4.80629	98.2526		12.8049	71.9605		5.80606	75.5691		13.8051	75.1128		6.80557	76.768		14.8056	77.0334		7.80442	82.84		15.8055	85.2765
0.805769	169.649		8.80772	142.725		1.80574	96.1292		9.80609	79.297		2.80599	63.9529		10.8055	69.5329		3.80714	74.3851		11.8064	62.3842		4.80768	86.7021		12.8066	63.3952		5.80793	74.9517		13.8069	75.4438		6.80661	76.8753		14.8065	69.9802		7.80609	69.9713		15.8071	92.3715
0.807435	163.75		8.80877	154.425		1.80685	91.2978		9.8072	79.8815		2.80731	69.7416		10.8071	64.0543		3.80804	88.3841		11.8082	55.9514		4.80844	84.4445		12.8083	68.2415		5.80932	76.3385		13.8081	68.4473		6.80828	78.0832		14.8081	75.8912		7.80713	82.5388		15.8089	73.0132
0.808963	174.86		8.8096	120.086		1.80782	88.569		9.80894	81.4383		2.80821	80.4034		10.8089	62.5989		3.80901	88.4318		11.8093	61.1257		4.80969	85.3839		12.8093	65.7811		5.81009	74.6654		13.8089	67.8896		6.80987	77.0095		14.8099	77.4479		7.80817	75.7748		15.81	74.6028
0.809935	164.013		8.81113	116.531		1.80949	91.4738		9.8106	79.2015		2.80953	80.976		10.8101	66.3716		3.81068	78.8586		11.8101	64.5136		4.81136	83.3708		12.8101	69.3301		5.81127	77.3495		13.8102	61.4508		6.81092	68.9185		14.811	87.9487		7.80984	68.2743		15.8108	71.9038
0.811046	168.06		8.81279	116.988		1.81116	94.3517		9.81144	75.6854		2.81141	82.494		10.811	60.2399		3.81228	73.2458		11.8115	67.8777		4.81275	76.1536		12.8117	79.3268		5.81293	70.0965		13.8119	70.6781		6.81196	74.2807		14.8119	89.416		7.81158	72.202		15.8122	65.1548
0.812644	175.566		8.81397	122.454		1.8122	99.5768		9.81241	81.4293		2.81273	81.316		10.8126	64.4152		3.81332	80.8567		11.8132	70.2158		4.81379	76.7292		12.8133	68.662		5.81439	81.5963		13.8133	77.1079		6.81355	78.45		14.8132	89.4458		7.81255	65.9213		15.8139	62.9986
0.81438	177.678		8.81495	121.306		1.81303	92.1955		9.814	80.0515		2.81356	72.211		10.8144	65.2532		3.81436	78.0772		11.8145	66.2046		4.8149	80.4422		12.8145	61.6029		5.81536	76.765		13.8142	77.0364		6.81529	76.5413		14.8149	81.3518		7.81338	69.8311		15.8152	65.4053
0.815491	169.488		8.81634	128.765		1.81449	95.0168		9.8156	71.4147		2.81474	67.2037		10.8154	70.6423		3.81589	79.288		11.8154	65.9063		4.81657	84.522		12.8155	73.7379		5.81647	69.4493		13.8154	68.6083		6.81647	71.2984		14.8162	82.7266		7.81491	83.9196		15.8161	72.3154
0.816394	162.012		8.81814	128.866		1.81616	97.8977		9.81671	76.3385		2.81641	74.9607		10.8162	76.0969		3.81763	72.202		11.8166	61.3016		4.81823	94.5605		12.8169	71.0031		5.81821	72.205		13.8171	71.8203		6.81737	65.9928		14.8171	89.1744		7.81658	73.8244		15.8174	71.8352
0.817991	172.062		8.81953	130.19		1.81734	96.0189		9.81769	84.3132		2.81787	72.3869		10.8177	72.5778		3.81881	72.7299		11.8184	73.1951		4.81928	101.453		12.8187	64.1498		5.81988	75.1903		13.8187	71.6682		6.81883	61.8832		14.8185	83.6959		7.81776	72.7299		15.8192	67.3707
0.819727	156.125		8.82043	131.729		1.81831	95.1063		9.81921	79.4103		2.81884	75.5512		10.8194	76.3803		3.81978	73.4397		11.8199	78.8914		4.82032	102.121		12.8201	55.5279		5.82092	74.8026		13.8197	77.0632		6.82064	64.1706		14.8202	85.19		7.8188	78.3904		15.8207	68.0715
0.820908	150.458		8.82168	140.148		1.81977	95.834		9.82102	78.4798		2.82002	81.3399		10.8206	79.3566		3.82124	70.7019		11.8209	71.4386		4.82192	99.2099		12.821	64.5583		5.82189	77.2362		13.8208	77.8804		6.82189	71.0091		14.8216	85.7418		7.82026	78.6588		15.8216	69.3688
0.82188	164.729		8.82349	126.358		1.8215	110.17		9.82227	79.5356		2.82169	78.6438		10.8216	67.3677		3.82297	77.9281		11.8221	71.1135		4.82365	92.2581		12.8222	56.3241		5.82356	81.2444		13.8225	73.1504		6.82279	77.4957		14.8226	91.6885		7.82199	78.0086		15.8228	65.0594
0.823408	166.861		8.82502	122.415		1.82289	92.6876		9.82317	82.673		2.82335	75.7182		10.8229	70.2307		3.82429	88.9179		11.8238	69.7565		4.82476	78.0146		12.824	65.9302		5.82529	82.1093		13.8242	62.6168		6.82432	67.4363		14.8238	82.3091		7.82338	77.8565		15.8246	68.2057
0.825213	153.861		8.82592	126.06		1.8238	95.8131		9.82456	81.7306		2.82439	68.3817		10.8246	61.233		3.82519	84.4653		11.8254	59.0977		4.82574	77.1557		12.8255	65.2025		5.8264	78.8884		13.8252	68.2266		6.82612	60.729		14.8255	76.8962		7.82429	71.6473		15.8261	78.6051
0.826394	166.42		8.8271	123.125		1.82512	114.67		9.82644	91.5573		2.82537	89.7291		10.8262	61.6416		3.82658	80.2662		11.8264	71.6413		4.82733	85.8312		12.8264	68.2505		5.82738	75.7629		13.8262	66.4611		6.82737	69.9891		14.8271	82.8102		7.8256	65.5962		15.8271	81.656
0.827158	169.969		8.82891	134.401		1.82685	98.7089		9.82775	95.6192		2.82696	80.8716		10.8271	66.8726		3.82846	85.9028		11.8275	72.4376		4.82914	93.3885		12.8276	67.5675		5.82897	77.0244		13.8279	69.2734		6.82814	68.3608		14.8281	92.8576		7.82741	75.7838		15.8282	87.6982
0.828547	166.852		8.8305	139.215		1.82831	85.2676		9.82859	83.9524		2.8287	76.1447		10.8283	72.5122		3.82971	79.4103		11.8291	71.6354		4.83018	92.8934		12.8294	68.6232		5.83078	74.06		13.8296	74.6893		6.82946	81.65		14.8292	82.9324		7.8288	74.4328		15.83	93.3139
0.830213	166.059		8.83134	131.398		1.82928	99.6841		9.82998	76.8992		2.82981	71.2894		10.8301	76.8097		3.83047	85.7507		11.8308	75.9061		4.83101	91.3187		12.8309	60.8036		5.83182	64.955		13.8306	79.8278		6.83112	70.8361		14.831	85.9326		7.82977	70.5111		15.8316	81.0148
0.831533	163.658		8.83231	122.132		1.83046	95.6431		9.83185	79.968		2.83078	73.1265		10.8316	81.1788		3.83179	78.4112		11.8318	67.6063		4.83247	98.9505		12.8317	68.8767		5.83259	74.5402		13.8315	66.3776		6.83244	72.9118		14.8326	86.0997		7.83102	71.534		15.8325	74.2777
0.832505	165.927		8.83397	132.036		1.83227	90.7372		9.83324	81.0387		2.83238	79.0673		10.8326	82.1033		3.83353	76.6874		11.8327	71.0896		4.83414	99.7557		12.8328	74.2211		5.83404	77.8177		13.8331	65.4709		6.83342	69.3002		14.8335	83.0935		7.83283	71.9843		15.8334	85.5181
0.833755	173.682		8.83557	127.918		1.8338	101.157		9.83401	71.5519		2.83419	74.3612		10.8337	67.8956		3.83485	82.6342		11.8342	74.406		4.83539	90.1974		12.8345	64.3436		5.83578	87.8294		13.8347	80.9313		6.83467	80.6688		14.8345	79.4163		7.83429	80.5794		15.835	85.3511
0.835491	159.45		8.83661	132.048		1.83463	107.331		9.83519	83.6601		2.83523	69.7714		10.8354	62.8137		3.83582	85.7328		11.8359	82.7207		4.83636	90.5642		12.836	84.4832		5.83696	82.7833		13.8358	76.3266		6.8364	73.0281		14.8361	74.4507		7.83505	71.2537		15.8366	86.9466
0.837019	155.197		8.83766	129.278		1.83567	99.3948		9.83692	79.461		2.83606	82.1481		10.837	70.854		3.83707	74.0123		11.837	80.3676		4.83768	96.6094		12.8371	86.6812		5.83793	73.1981		13.8368	82.8161		6.838	73.2608		14.8377	86.6693		7.83616	82.8996		15.8377	83.4007
0.837991	172.703		8.83925	136.188		1.83734	99.6931		9.83831	78.9868		2.83752	87.2031		10.8379	76.6427		3.83874	88.8881		11.838	75.238		4.83942	90.3614		12.8381	84.3967		5.83925	81.3846		13.8383	82.0079		6.83897	81.6798		14.8388	88.9448		7.83783	84.8739		15.8387	75.7838
0.839172	173.377		8.84099	125.013		1.83887	96.7972		9.83928	88.8434		2.83919	82.2823		10.8389	78.1965		3.84033	97.7576		11.8395	71.6921		4.84087	88.3871		12.8397	83.9643		5.84106	81.8469		13.84	86.7438		6.84008	79.1061		14.8398	78.4351		7.83936	79.2373		15.8402	76.2818
0.840838	172.035		8.84217	122.23		1.83991	88.3901		9.84046	86.7319		2.84044	95.4612		10.8405	84.4206		3.84131	80.2961		11.8412	75.1605		4.84178	100.853		12.8414	70.4246		5.84252	79.7652		13.8414	83.0965		6.84182	72.2259		14.8413	95.2017		7.8404	90.8326		15.8421	81.8349
0.842435	151.263		8.84314	117.378		1.84095	98.1035		9.84213	91.7691		2.84141	93.0604		10.8421	82.0407		3.84242	82.6402		11.8425	71.7606		4.84303	104.59		12.8426	74.2121		5.84342	75.5452		13.8423	77.7849		6.84348	70.6721		14.843	85.4585		7.84151	95.1152		15.8433	90.1824
0.843477	167.785		8.8446	121.401		1.84255	107.769		9.8438	86.9943		2.84273	91.1905		10.8432	83.0129		3.84408	95.0496		11.8434	76.4518		4.84476	98.6463		12.8436	80.9939		5.84467	79.8129		13.8436	90.7372		6.84453	82.6252		14.8443	94.3816		7.8431	78.6945		15.8442	94.3696
0.844519	173.055		8.84641	140.22		1.84428	111.909		9.84484	100.078		2.84453	90.266		10.8442	76.3624		3.84575	107.408		11.8448	79.4014		4.84629	94.8915		12.8451	92.7622		5.8464	82.9294		13.8454	77.0185		6.8455	81.5725		14.8452	105.705		7.84484	86.7587		15.8456	90.6447
0.846255	185.477		8.84766	139.978		1.84546	105.273		9.84581	106.063		2.84599	100.418		10.8458	71.6473		3.84679	113.886		11.8466	79.0584		4.84726	109.329		12.8469	86.0132		5.84793	86.046		13.8468	85.9804		6.84724	92.0882		14.8466	97.3907		7.84595	96.0725		15.8474	82.2375
0.847921	172.867		8.84856	136.558		1.84637	108.947		9.84748	98.9863		2.84696	90.7879		10.8474	79.6131		3.84783	108.631		11.848	94.3517		4.84844	106.851		12.848	85.6523		5.8489	101.903		13.8477	86.7528		6.8489	102.881		14.8485	104.566		7.84692	93.8358		15.8488	101.545
0.848824	162.25		8.85002	144.315		1.84789	111.658		9.84921	96.5944		2.84814	93.5197		10.8487	86.7259		3.8495	100.877		11.8489	96.6511		4.85025	106.087		12.8489	92.0911		5.85009	98.7745		13.849	81.2683		6.84987	106.904		14.8498	110.835		7.84845	95.8011		15.8497	102.458
0.849727	159.891		8.85189	131.377		1.8497	110.015		9.85032	104.441		2.84981	93.9879		10.8496	98.4823		3.85124	109.821		11.8503	105.166		4.85178	125.964		12.8505	106.502		5.85182	98.2049		13.8508	94.4323		6.85078	112.955		14.8507	119.901		7.85019	88.8434		15.851	100.376
0.851324	166.008		8.85314	140.959		1.85095	113.716		9.8513	99.4962		2.85141	98.7924		10.851	95.6341		3.85221	114.548		11.8521	112.654		4.85268	122.899		12.8523	109.347		5.85342	102.174		13.8523	109.508		6.8523	115.502		14.852	118.383		7.85137	102.714		15.8528	109.839
0.852991	181.382		8.85391	155.674		1.85185	115.72		9.85289	109.55		2.85238	113.91		10.8528	110.262		3.85304	126.963		11.8534	118.544		4.85365	113.805		12.8535	114.175		5.85432	104.211		13.8531	123.85		6.8539	133.024		14.8539	110.271		7.85234	114.375		15.8542	108.22
0.854102	177.344		8.85522	155.281		1.85331	114.432		9.85463	136.82		2.85349	122.335		10.8542	120.909		3.85457	132.039		11.8543	117.993		4.85532	134.893		12.8543	102.926		5.85529	121.127		13.8542	113.289		6.85508	122.353		14.8553	118.828		7.85387	111.73		15.855	127.014
0.855074	183.127		8.85696	170.094		1.85512	120.874		9.85567	132.57		2.85523	123.573		10.8551	118.175		3.85631	136.062		11.8554	119.531		4.85685	136.635		12.8556	114.882		5.85689	119.791		13.8559	119.517		6.85605	118.064		14.856	125.454		7.85567	129.412		15.8562	141.571
0.856533	190.213		8.85828	159.181		1.85637	140.11		9.85651	124.587		2.85689	126.987		10.8565	121.568		3.85749	138.198		11.8571	120.865		4.85796	141.24		12.8573	122.019		5.85849	135.248		13.8574	136.408		6.85751	138.189		14.8572	131.001		7.85679	128.565		15.8579	133.22
0.858338	196.147		8.85925	159.217		1.85713	160.538		9.85796	131.192		2.8578	136.31		10.8583	131.025		3.85839	157.115		11.8585	128.878		4.859	163.422		12.8587	129.922		5.85953	140.101		13.8584	149.552		6.85932	148.356		14.8589	141.079		7.85755	134.306		15.8593	133.802
0.859588	210.322		8.8605	178.438		1.85838	164.302		9.8597	138.857		2.85877	156.259		10.8596	138.213		3.85985	162.337		11.8595	144.974		4.86053	164.022		12.8596	135.207		5.86057	146.864		13.8595	164.636		6.86064	149.847		14.8603	151.803		7.85894	145.418		15.8603	150.768
0.86056	215.634		8.86224	182.807		1.86012	157.013		9.86088	153.229		2.86037	160.345		10.8604	145.97		3.86158	166.342		11.8606	154.165		4.86226	166.065		12.8609	146.417		5.86217	159.023		13.8611	157.729		6.86154	161.803		14.8613	159.596		7.86067	143.074		15.8614	177.702
0.86188	208.279		8.86384	192.288		1.8615	172.441		9.86185	167.237		2.86196	152.841		10.8617	142.57		3.86297	171.108		11.8623	156.837		4.86351	165.233		12.8626	154.881		5.8639	174.353		13.8628	149.456		6.86286	168.725		14.8625	177.12		7.86199	152.859		15.8632	162.274
0.863685	222.243		8.86481	217.528		1.86248	200.287		9.86324	175.823		2.86301	172.334		10.8633	162.438		3.86388	198.477		11.864	180.89		4.86442	188.083		12.8642	163.709		5.86508	196.72		13.8639	161.475		6.86467	169.286		14.8641	182.479		7.86297	173.267		15.8648	169.029
0.865144	239.427		8.86592	236.272		1.86366	208.017		9.86498	190.409		2.86405	174.701		10.8647	185.903		3.86513	210.713		11.8651	188.581		4.86587	183.475		12.8651	186.646		5.86606	203.183		13.8649	183.711		6.86612	174.627		14.8657	185.906		7.86429	187.391		15.8659	182.172
0.866047	267.004		8.86759	253.295		1.86539	204.328		9.86644	205.145		2.86558	178.322		10.8657	188.796		3.86693	219.362		11.8661	200.633		4.86768	184.248		12.8662	189.348		5.86752	211.471		13.8664	198.372		6.86703	197.296		14.8668	204.158		7.86602	183.693		15.8669	194.778
0.867296	281.543		8.86925	251.091		1.86699	201.381		9.86734	201.706		2.86738	214.817		10.8669	202.061		3.86832	246.71		11.8676	215.538		4.869	228.55		12.868	200.836		5.86925	238.696		13.8682	209.574		6.86828	204.811		14.8678	211.969		7.86755	195.572		15.8684	217.906
0.869171	288.319		8.87029	270.491		1.86796	234.118		9.86859	209.472		2.86856	231.986		10.8686	218.634		3.86929	239.4		11.8694	228.673		4.86983	248.94		12.8696	229.523		5.87057	257.204		13.8694	234.387		6.87008	231.121		14.8695	233.722		7.86852	221.39		15.8702	237.542
0.87056	327.68		8.87134	283.619		1.86907	234.804		9.87039	245.57		2.86946	218.401		10.8702	229.499		3.87054	247.989		11.8706	238.013		4.87122	250.521		12.8706	254.95		5.87147	269.047		13.8703	243.73		6.87154	253.456		14.8712	258.123		7.86963	221.208		15.8714	256.208
0.871324	350.486		8.873	307.597		1.87074	245.937		9.87192	261.013		2.87092	232.496		10.8712	249.972		3.87235	277.249		11.8715	254.019		4.8731	271.532		12.8717	267.977		5.87286	267.1		13.8718	283.198		6.87237	259.134		14.8723	291.23		7.87137	242.457		15.8723	291.131
0.872505	365.036		8.87467	341.416		1.87241	276.094		9.87282	288.113		2.87266	277.639		10.8723	264.833		3.87381	311.125		11.873	280.911		4.87442	301.191		12.8733	291.036		5.87474	298.17		13.8736	296.702		6.87349	308.611		14.8733	296.231		7.87304	273.744		15.8739	290.684
0.874171	388.835		8.87571	372.999		1.87345	327.653		9.87401	314.584		2.87398	287.374		10.8739	282.381		3.87464	351.592		11.8748	286.84		4.87518	318.205		12.8751	316.132		5.87599	347.202		13.8748	315.267		6.87515	336.773		14.8749	307.003		7.87401	293.446		15.8757	314.659
0.87563	441.628		8.87654	381.487		1.87449	342.645		9.87581	325.428		2.87488	322.655		10.8756	341.237		3.87575	363.93		11.8759	329.418		4.87643	342.4		12.876	355.493		5.87675	374.958		13.8756	348.201		6.87668	338.097		14.8767	330.051		7.87505	310.49		15.8768	379.575
0.876671	465.311		8.87807	393.825		1.87616	356.465		9.87734	352.457		2.87627	378.487		10.8767	374.636		3.87742	385.611		11.8768	375.155		4.8781	390.452		12.8769	364.872		5.87807	382.373		13.8769	359.674		6.87765	390.204		14.8778	382.739		7.87679	345.377		15.8775	400.016
0.877783	505.578		8.87974	441.184		1.87789	421.793		9.87824	398.504		2.87814	399.828		10.8777	406.771		3.87895	433.582		11.8782	385.528		4.87949	425.542		12.8784	389.324		5.87974	447.307		13.8786	390.35		6.87876	437.021		14.8785	406.741		7.87845	395.038		15.879	438.619
0.87938	546.016		8.88092	498.805		1.8788	448.923		9.87921	442.601		2.87946	440.626		10.8793	431.062		3.87999	468.699		11.8798	417.51		4.88053	462.707		12.8801	457.691		5.88113	493.217		13.8799	479.683		6.88043	485.164		14.88	437.817		7.87942	424.546		15.8807	491.517
0.881047	584.795		8.88189	516.052		1.8797	488.218		9.88088	487.013		2.88023	478.684		10.8811	483.554		3.88103	513.165		11.8812	478.955		4.88164	491.493		12.8812	487.669		5.8821	535.291		13.8809	510.663		6.8821	521.435		14.8817	506.962		7.88033	443.516		15.8819	557.644
0.882158	656.827		8.88335	596.5		1.88123	520.582		9.88241	589.17		2.88148	501.167		10.8821	529.207		3.88263	568.314		11.8821	553.4		4.88337	541.629		12.8822	541.736		5.88335	592.25		13.8822	551.22		6.88321	577.27		14.8829	565.529		7.88192	490.121		15.8829	603.407
0.883199	761.7		8.88509	664.557		1.88289	593.888		9.88345	658.032		2.88315	545.163		10.883	574.115		3.88436	636.532		11.8834	624.806		4.88497	630.266		12.8837	574.515		5.88502	666.555		13.884	606.542		6.88418	632.056		14.8839	607.41		7.88352	568.434		15.8842	658.765
0.884727	814.341		8.8864	798.833		1.884	693.077		9.88449	700.055		2.8846	627.024		10.8844	606.581		3.88547	723.887		11.8851	669.054		4.88601	688.669		12.8854	660.134		5.88661	765.485		13.8855	705.176		6.88578	678.276		14.8853	651.891		7.8847	592.051		15.886	712.062
0.886463	951.889		8.88731	892.272		1.88505	731.319		9.88609	745.083		2.88558	741.253		10.8861	696.486		3.88644	811.988		11.8866	703.387		4.88705	780.891		12.8868	741.641		5.88765	847.299		13.8865	796.113		6.88758	791.344		14.887	760.361		7.88567	663.373		15.8875	811.162
0.887644	1103.46		8.88863	928.2		1.8865	807.088		9.88783	801.824		2.88676	772.129		10.8873	779.851		3.88797	836.556		11.8876	859.726		4.88872	883.078		12.8877	822.462		5.8887	917.407		13.8876	855.103		6.88876	924.648		14.8884	848.176		7.88713	739.986		15.8884	922.134
0.888616	1206.39		8.89043	994.59		1.88824	870.606		9.889	946.049		2.88842	843.013		10.8883	890.387		3.88978	895.201		11.8888	892.636		4.89039	967.546		12.889	854.486		5.89036	993.74		13.8893	895.931		6.88967	993.176		14.8894	933.565		7.88894	810.98		15.8896	995.222
0.890144	1242.26		8.89182	1117.43		1.88956	967.269		9.88991	1038.37		2.89002	988.565		10.8896	957.609		3.89096	1092.27		11.8905	963.201		4.8915	1047.85		12.8908	958.032		5.89203	1091.23		13.8909	1041.26		6.89119	1059.71		14.8906	995.923		7.89026	887.426		15.8914	1071.26
0.891949	1372.39		8.89279	1247.52		1.89046	1132.73		9.89144	1098.63		2.89106	1090.78		10.8915	1054.59		3.89186	1245.05		11.8921	1129.17		4.89247	1188.01		12.8922	1144.88		5.89314	1239.86		13.8919	1182.85		6.893	1169.36		14.8923	1114.93		7.89116	988.571		15.8929	1201.65
0.89306	1641.23		8.89404	1289.68		1.89178	1245.04		9.89324	1188.01		2.8921	1124.16		10.8928	1161.87		3.89332	1262.58		11.8931	1258.37		4.89414	1243.49		12.8931	1279.78		5.89411	1342.33		13.8929	1264.26		6.89418	1276.36		14.8939	1265.91		7.89255	1069.82		15.8939	1358.43
0.893894	1744.25		8.89585	1412.93		1.89359	1289.42		9.89449	1386.07		2.89377	1264.03		10.8938	1334.17		3.8952	1390.59		11.8941	1305.56		4.89587	1368.19		12.8944	1309.14		5.89578	1436.41		13.8947	1330.04		6.89494	1395.62		14.8948	1423.3		7.89435	1166.91		15.895	1426.25
0.895283	1791.83		8.89731	1598.08		1.89505	1504.03		9.89539	1499.34		2.89544	1406.94		10.895	1416.18		3.89644	1559.7		11.8959	1405.18		4.89692	1535.6		12.8962	1414.69		5.89752	1615.74		13.8964	1495.6		6.89633	1478.2		14.896	1478.4		7.89567	1343.11		15.8968	1513.82
0.896949	2003.55		8.89814	1705.74		1.89595	1641.05		9.89685	1535.58		2.89655	1580.7		10.8968	1499.55		3.89721	1702.21		11.8975	1526.97		4.89775	1666.04		12.8977	1610.11		5.89849	1733.65		13.8973	1622.88		6.898	1604.49		14.8978	1556.34		7.89658	1470.11		15.8984	1699.26
0.898269	2280.65		8.89925	1831.69		1.8972	1693.09		9.89866	1694.11		2.89752	1729.1		10.8983	1690.91		3.89853	1766.44		11.8984	1704.45		4.89921	1736.58		12.8985	1756.98		5.89939	1857.07		13.8982	1761.63		6.89932	1753.1		14.8994	1700.92		7.8979	1531.42		15.8993	1857.39
0.899241	2465.03		8.90092	1902.12		1.899	1861.64		9.89991	1904.44		2.89919	1792.68		10.8992	1849.72		3.9002	1864.84		11.8994	1786.9		4.90094	1868.72		12.8996	1770.83		5.90085	1971.82		13.8998	1836.93		6.90029	1930.48		14.9002	1910.8		7.8997	1644.11		15.9002	1916.1
0.900491	2598.07		8.90245	2087.62		1.90046	2053.39		9.90074	2022.95		2.90092	1962.17		10.9004	1963.02		3.90151	2072.9		11.9009	1932.94		4.90212	2042.6		12.9012	1868.02		5.90252	2101.23		13.9014	2014.52		6.90154	2060.22		14.9012	1966.15		7.90109	1849.65		15.9018	2036.96
0.902227	2750.85		8.90342	2313.55		1.90123	2247.15		9.90199	2101.05		2.90196	2122.43		10.9022	2066.58		3.90249	2295.37		11.9025	2132.03		4.90303	2207.68		12.9028	2109.73		5.9037	2271.85		13.9025	2247.42		6.90328	2230.43		14.9028	2085.75		7.90192	1911.05		15.9034	2287.1
0.903755	3000.24		8.90453	2393.95		1.90234	2329.61		9.90373	2278.23		2.9028	2222.12		10.9038	2309.76		3.90374	2369.83		11.9037	2302.4		4.90448	2317.98		12.9037	2318.68		5.90467	2434.82		13.9035	2342.63		6.9048	2437.21		14.9044	2322.7		7.90304	2009.13		15.9045	2456.16
0.904658	3309.99		8.90613	2546.93		1.904	2513.77		9.90512	2492.97		2.90426	2350.47		10.9046	2488.36		3.90547	2511.34		11.9046	2415.92		4.90622	2473.37		12.9048	2406.86		5.90606	2542.38		13.905	2454.64		6.90578	2565.64		14.9055	2440.09		7.90477	2201.8		15.9055	2594.6
0.905838	3426.08		8.90786	2742.58		1.90553	2743.7		9.90609	2643.1		2.90592	2556		10.9056	2574.65		3.907	2763.82		11.9062	2584.05		4.90761	2603.66		12.9065	2586.4		5.90786	2747.22		13.9067	2632.52		6.90696	2653.84		14.9066	2568.02		7.90623	2397.78		15.9071	2715.46
0.907574	3574.35		8.90897	2983.02		1.90657	2858.52		9.90727	2728.42		2.9071	2803.55		10.9073	2687.05		3.90797	2991.12		11.908	2720.53		4.90851	2870.41		12.9082	2727.07		5.90925	2945.01		13.9081	2843.58		6.90869	2850.85		14.9081	2700.04		7.90727	2566.92		15.9088	2874.43
0.909171	3901.66		8.90995	3074.98		1.90762	3124.5		9.909	2843.07		2.90808	2947.72		10.9088	2903.65		3.90908	3124.03		11.9092	2975.57		4.90983	2997.04		12.9093	2930.19		5.91015	3037.24		13.909	3024.05		6.91029	3065.79		14.9098	2860.51		7.90838	2649.22		15.91	3078.57
0.910144	4276.32		8.91148	3274.82		1.90921	3339.74		9.9106	3114.49		2.90953	3013.36		10.9099	3124.22		3.91082	3254.88		11.9101	3149.38		4.91157	3071.8		12.9103	3071.25		5.9114	3119.03		13.9103	3114.79		6.91133	3238.71		14.911	3083.84		7.91005	2832.55		15.9109	3250.86
0.911255	4398.25		8.91328	3463.32		1.91095	3455.82		9.91157	3314.46		2.91127	3256.31		10.9109	3259.8		3.91242	3437.09		11.9115	3265.5		4.91303	3321.65		12.9118	3226.47		5.91321	3377.23		13.9121	3271.44		6.91237	3334.51		14.9119	3256.51		7.91172	3019.55		15.9123	3368.89
0.912991	4582.55		8.91446	3679.03		1.91206	3716.1		9.91262	3473.36		2.91266	3431.96		10.9125	3301.49		3.91346	3679.69		11.9133	3421.5		4.91393	3518.68		12.9135	3448.98		5.91474	3660.46		13.9135	3515.7		6.91411	3495.6		14.9134	3417.77		7.91276	3234.81		15.9141	3568.86
0.914658	4883.14		8.91543	3790.04		1.91303	3904.26		9.91428	3643.71		2.91356	3609.02		10.9142	3540		3.9145	3884.09		11.9146	3714.66		4.91518	3672.75		12.9147	3692.7		5.91564	3820.71		13.9144	3729.48		6.91578	3656.2		14.9152	3594.24		7.9138	3374.78		15.9155	3826.3
0.91556	5043		8.91696	3913.9		1.91456	4004.07		9.91595	3833.63		2.91481	3789.57		10.9154	3805.83		3.91624	3986.78		11.9155	3871.74		4.91699	3816.96		12.9157	3908		5.91682	3948.51		13.9157	3768.31		6.91668	3888.81		14.9165	3883.72		7.9154	3456.11		15.9164	3986.51
0.916463	5268.23		8.91877	4131.12		1.91637	4161.23		9.91706	4076.21		2.91655	3971.67		10.9163	4004.22		3.9179	4284.61		11.9169	3947.38		4.91851	4029.59		12.9172	3988.64		5.9187	4054.81		13.9175	3957.43		6.91758	4093.39		14.9173	4119.61		7.91713	3652.58		15.9177	4130.08
0.91806	5449.75		8.91995	4410.51		1.91755	4509.95		9.91803	4219.37		2.91808	4226.93		10.9178	4096.97		3.91881	4501.4		11.9187	4122.56		4.91935	4315.71		12.919	4237.05		5.92015	4266.22		13.9189	4159.07		6.91918	4212.47		14.9187	4165.39		7.91824	3856.92		15.9196	4341.86
0.919658	5759.19		8.92071	4570.41		1.91845	4733.85		9.9197	4324.76		2.91905	4449.94		10.9196	4317.88		3.91971	4563.04		11.9201	4332.82		4.92032	4486.42		12.9201	4466.43		5.92099	4481.94		13.9197	4438.13		6.92078	4345.59		14.9206	4323.61		7.91922	4019.54		15.9209	4563.91
0.920769	6037.78		8.9221	4637.36		1.91998	4844.56		9.92144	4516.54		2.92016	4565.19		10.9209	4610.26		3.92131	4608.85		11.9209	4624.43		4.92199	4566.62		12.9209	4581.41		5.92203	4660.21		13.9208	4556.22		6.92189	4588.09		14.9219	4597.46		7.92081	4137.17		15.9217	4749.77
0.92181	6183.34		8.92384	4872.68		1.92178	5072.61		9.92248	4739.34		2.92196	4753.49		10.9218	4687.8		3.9229	4966.9		11.9221	4668.23		4.92358	4806.32		12.9223	4693.24		5.9237	4809.75		13.9226	4705.59		6.92286	4730.67		14.9226	4751.38		7.92255	4385.71		15.923	4825.26
0.923338	6344.3		8.92516	5055.27		1.92296	5342.02		9.92331	4983.85		2.92356	5023.19		10.9232	4856.99		3.92401	5221.97		11.9237	4801.77		4.92462	4914.75		12.9239	4881.9		5.92522	5049.69		13.924	4920.37		6.92439	4806.13		14.9239	4825.08		7.92366	4537.99		15.9247	5018.83
0.925074	6682.82		8.92613	5254.44		1.92373	5540.43		9.92477	5047.81		2.9244	5238.09		10.9251	5028.99		3.92506	5383.33		11.9252	5005.04		4.92567	5054.12		12.9253	5153.31		5.92627	5200.63		13.925	5155.73		6.92612	5041.69		14.9257	5068.74		7.92449	4685.09		15.926	5230.83
0.926324	6967.25		8.92738	5371.72		1.92512	5620.95		9.92651	5227.62		2.92537	5371.58		10.9263	5292.88		3.92651	5537.98		11.9262	5252.73		4.92726	5327.39		12.9262	5297.2		5.92731	5394.51		13.9261	5223.28		6.92744	5271.24		14.927	5330.63		7.92588	4850.94		15.927	5417.28
0.927297	7240.99		8.92911	5602.31		1.92685	5846.6		9.92769	5473.61		2.92703	5602.56		10.9271	5513.82		3.92825	5740.14		11.9273	5425.33		4.92893	5532.07		12.9275	5381.27		5.9289	5509.97		13.9278	5435.8		6.92835	5434.12		14.928	5511.65		7.92762	5054.62		15.9282	5575.66
0.928685	7418.23		8.93071	5879.06		1.92817	6122.08		9.92866	5698.83		2.92856	5835.22		10.9283	5676.9		3.92957	6048.04		11.929	5539.09		4.93011	5743.52		12.9292	5620.79		5.93064	5745.96		13.9294	5730.6		6.92974	5649.97		14.9292	5549.58		7.92887	5228.65		15.9299	5773.68
0.930491	7696.01		8.93168	6083.46		1.92907	6367.66		9.93005	5856.38		2.9296	5961.93		10.9301	5842.42		3.93047	6241.54		11.9307	5765.07		4.93108	6003.67		12.9307	5893.38		5.93182	6055.37		13.9306	5901.54		6.93154	5832.28		14.9309	5756.54		7.92984	5438.92		15.9315	6123.09
0.93181	8015.21		8.93279	6217.7		1.93032	6514.66		9.93178	6059.64		2.93064	6202.65		10.9315	6103.39		3.93179	6366.74		11.9317	6081.65		4.93254	6104.36		12.9317	6110.82		5.93279	6317.41		13.9315	6133.54		6.93293	6076.08		14.9325	6054.72		7.93116	5627.76		15.9325	6259.28
0.932713	8310.22		8.93453	6496.1		1.93206	6768.35		9.93317	6346.46		2.93224	6408.98		10.9324	6272.07		3.9336	6544.1		11.9327	6213.19		4.93435	6328.13		12.9328	6237.04		5.93425	6386.12		13.9331	6365.59		6.93383	6318.92		14.9335	6273.81		7.93297	5836.22		15.9336	6400.2
0.934102	8546.41		8.93613	6753.01		1.93359	7125.54		9.93414	6589.16		2.93398	6616.96		10.9336	6411.63		3.93499	6809.54		11.9344	6299.08		4.9356	6585.08		12.9346	6482		5.93599	6567.46		13.9348	6465.19		6.93515	6432.01		14.9346	6438.15		7.93442	5954.41		15.9352	6590.49
0.935908	8866.11		8.93717	7049.61		1.93456	7422.07		9.93539	6700.62		2.93516	6970.03		10.9353	6616.93		3.93589	7072.05		11.9361	6530.69		4.9365	6734.17		12.9362	6733.04		5.93731	6818.04		13.936	6698.06		6.93703	6595.57		14.9362	6486.63		7.93533	6192.87		15.9369	6921.99
0.937297	9176.85		8.93821	7117.76		1.93574	7457.7		9.93713	6847.17		2.93606	7092.03		10.9369	6991.45		3.93721	7191.74		11.9372	6854.45		4.93796	6809.9		12.9372	6911.24		5.93821	7004.67		13.9369	6948.92		6.93842	6916.15		14.9379	6763.41		7.93651	6301.42		15.938	7115.88
0.93806	9560.85		8.93995	7170.11		1.93748	7717.4		9.93866	7150.05		2.93752	7298.59		10.938	7273.63		3.93901	7398.23		11.9382	7000.58		4.93976	7098.93		12.9382	7020.88		5.93967	7163.8		13.9385	6970.6		6.93918	7205.83		14.9389	7215.74		7.93824	6428.87		15.9391	7255.36
0.939241	9676.27		8.94161	7480.44		1.93907	8111.22		9.93956	7412.39		2.93933	7524.27		10.939	7242.81		3.94047	7764.21		11.9398	7226.4		4.94101	7432.24		12.94	7254.72		5.94147	7423.76		13.9403	7170.48		6.94029	7271.91		14.94	7429.23		7.93984	6841.24		15.9407	7262.84
0.940977	9972.02		8.94252	7857.24		1.94005	8384.05		9.94081	7609.59		2.94058	7823.62		10.9407	7373.39		3.94124	8013.06		11.9415	7585.59		4.94185	7627.35		12.9417	7552.76		5.94272	7654.6		13.9414	7686.68		6.94196	7384.19		14.9416	7466.48		7.94081	7058.38		15.9424	7570.03
0.942435	10410.2		8.94342	8039.93		1.94109	8541.85		9.94262	7755.74		2.94148	8022		10.9424	7673.63		3.94235	8012.68		11.9426	7799.35		4.9431	7720.2		12.9426	7778.32		5.94349	7879.42		13.9422	7865.45		6.94342	7688.02		14.9433	7629.97		7.94192	7100.84		15.9434	7905.13
0.943408	10631.2		8.94502	8088.77		1.94282	8713.1		9.94414	8005.68		2.94294	8142.4		10.9434	8034.79		3.94408	8290.71		11.9434	7867.07		4.94483	7760.09		12.9435	7843.93		5.94481	8016.31		13.9436	7970.96		6.94446	7911.61		14.9444	8044.25		7.94366	7346.5		15.9443	8116.54
0.944519	10763.9		8.94661	8386.79		1.94449	9180.24		9.94498	8172.42		2.94474	8373.35		10.9444	8139.38		3.94554	8544.01		11.9448	7953.67		4.94615	8031.33		12.9451	8054.98		5.94654	8209.76		13.9453	8241.96		6.94557	8058.44		14.9452	8245.78		7.94526	7585.31		15.9457	8334.06
0.946185	11133.6		8.94779	8466.15		1.94546	9328.74		9.94602	8290.05		2.94599	8708.63		10.9461	8308.19		3.94658	8777.85		11.9466	8230.75		4.94712	8372.69		12.9467	8405.92		5.94786	8500.57		13.9466	8408.36		6.94724	8325.66		14.9467	8310.14		7.94616	7755.4		15.9475	8536.44
0.947852	11494		8.94877	8728.21		1.94637	9384.88		9.94775	8485.56		2.94683	8874.81		10.9478	8570.89		3.9477	8940.08		11.9478	8642.17		4.94837	8553.37		12.9478	8638.4		5.94877	8656.52		13.9476	8759.11		6.9489	8470.51		14.9484	8555.84		7.9472	7893.56		15.9487	8800.5
0.948894	11880.7		8.95022	8802.32		1.94789	9526.18		9.94928	8847.17		2.94808	9030.33		10.9489	8799.25		3.94936	9099.18		11.9487	8776.1		4.95004	8693.98		12.9487	8760.37		5.95002	8778.35		13.9489	8868.51		6.95001	8640.94		14.9496	8698.91		7.9488	7968.33		15.9496	8933.2
0.949935	12099.9		8.95203	9122.72		1.94956	9865.11		9.95026	9047.51		2.94981	9204.3		10.9497	8865.68		3.95103	9323.81		11.9501	8909.76		4.95164	9029.9		12.9503	8897.34		5.95175	8902.64		13.9506	9013.67		6.95105	8872.54		14.9505	8908.41		7.9504	8275.82		15.951	9122.83
0.951533	12395.2		8.95328	9500.23		1.95067	10196.8		9.95137	9134.49		2.9512	9400.56		10.9512	9154.56		3.95214	9667.09		11.9519	9060.47		4.95261	9265.85		12.9521	9246.91		5.95335	9265.4		13.9521	9283.11		6.95258	9082.87		14.952	9033.14		7.95151	8592.04		15.9527	9384.37
0.953269	12674		8.95418	9688.21		1.95164	10397.7		9.95296	9323.63		2.95217	9716.79		10.9529	9369.05		3.95311	9884.62		11.9533	9434.07		4.95372	9356.02		12.9533	9562.37		5.95432	9539.06		13.9531	9523.37		6.95432	9239.61		14.9537	9356.28		7.95248	8846.19		15.9541	9631.48
0.95438	13042.5		8.95557	9834.36		1.95317	10485.8		9.9547	9734.67		2.95335	9897.97		10.954	9698.2		3.95464	10116.6		11.9543	9705.92		4.95546	9457.07		12.9543	9732.68		5.95543	9732.74		13.9542	9615.53		6.9555	9638.81		14.9551	9585.69		7.95401	8871		15.955	9883
0.955352	13362.1		8.95738	9998.46		1.95491	10761.5		9.95581	9978.24		2.95509	10150.7		10.9551	9876.64		3.95644	10332		11.9555	9755.65		4.95712	9824.67		12.9557	9815.21		5.9571	9861.19		13.956	9701.21		6.9564	9787.56		14.956	9905.67		7.95574	9004.83		15.9563	10099.8
0.956949	13426.2		8.95877	10221.6		1.95623	11145.5		9.95678	9984.75		2.95669	10451		10.9565	10102.8		3.95763	10695.8		11.9572	9854.7		4.95817	9973.29		12.9575	9981.82		5.95877	10033.8		13.9575	9952.48		6.958	9803.51		14.9573	10045.9		7.95699	9283.06		15.9581	10152.8
0.958685	13758.1		8.95967	10473.4		1.95713	11424.8		9.95831	10109.8		2.95766	10654.9		10.9582	10208.1		3.95853	10889.8		11.9587	10105.8		4.95914	10130.5		12.9588	10296.2		5.95981	10319.1		13.9585	10375		6.9598	10153.5		14.9591	10149		7.9579	9435.37		15.9596	10424.6
0.959797	14144.8		8.96099	10615.1		1.95845	11580.1		9.96012	10371.2		2.95877	10824.2		10.9596	10524.9		3.96006	10855.8		11.9597	10400.8		4.9608	10209.6		12.9597	10511.3		5.96085	10552.4		13.9596	10475.9		6.96092	10339.9		14.9605	10327.6		7.95935	9514.03		15.9605	10612
0.96063	14272.3		8.96279	10865.2		1.96025	11867.2		9.96137	10693.4		2.96044	10985.9		10.9605	10873.4		3.96186	11041.1		11.9608	10483.7		4.96254	10580.9		12.9611	10658.3		5.96252	10754.2		13.9614	10692.1		6.96175	10396.8		14.9614	10645.1		7.96116	9880.93		15.9618	10744.9
0.962088	14299		8.96418	11150.6		1.96171	12118.8		9.96227	10888.7		2.9621	11266.6		10.9618	10891.3		3.96304	11470.7		11.9626	10625.9		4.96358	10839.8		12.9629	10718.4		5.96425	10769.4		13.963	10984		6.96314	10524.6		14.9627	10788.9		7.96248	10222.9		15.9636	10986.7
0.963824	14653.1		8.96502	11294.1		1.96262	12378.9		9.96373	11094.5		2.96314	11438.6		10.9635	11044.7		3.96381	11679.8		11.9642	10919.7		4.96442	11062.9		12.9642	11020		5.96522	10907.1		13.9639	11208.8		6.96481	10854.6		14.9645	10840.2		7.96338	10390.5		15.9651	11248.8
0.965005	14884.7		8.96613	11417.7		1.96387	12423		9.9656	11312.7		2.96419	11600.7		10.9651	11371.4		3.96519	11746.6		11.965	11223.7		4.96594	11136.1		12.9651	11332.3		5.96613	11235.4		13.9649	11346.3		6.96605	11103		14.966	11133		7.96477	10425		15.9659	11383.8
0.965977	15200.5		8.96786	11526.4		1.96574	12701.5		9.96678	11518.7		2.96585	11743.7		10.966	11496.1		3.96693	11888.5		11.966	11376.9		4.96761	11431.3		12.9662	11393.4		5.96765	11359		13.9665	11514.5		6.96703	11285.1		14.9669	11431.3		7.96665	10718.1		15.967	11405.8
0.967296	15516.9		8.96932	11833.4		1.96713	13048		9.96762	11711.4		2.96752	11970.4		10.9672	11587.1		3.96818	12107.5		11.9677	11593.3		4.96879	11629.5		12.9679	11554.2		5.96932	11493.1		13.9681	11718.2		6.96835	11358.9		14.9679	11528.4		7.96797	10923.3		15.9686	11705.2
0.969102	15752.4		8.97036	11965.5		1.96789	13189.9		9.96894	11813.3		2.96849	12243.6		10.969	11807.2		3.96915	12209.4		11.9692	11761.3		4.96969	11695.1		12.9694	11715.5		5.9705	11681.3		13.9692	11814.5		6.97015	11413		14.9696	11588		7.96873	11093.6		15.9702	11943.3
0.970491	15915.4		8.97147	12171.6		1.96907	13157.4		9.97067	11949.3		2.96933	12309.6		10.9705	11964.8		3.97047	12342.2		11.9703	11749.7		4.97115	11832.5		12.9703	11835.9		5.9714	11945.7		13.9701	11873.1		6.97161	11562.6		14.9711	11722.6		7.96991	11182.7		15.9712	11971.3
0.971463	16081.4		8.97314	12249.3		1.97081	13422.9		9.97199	12123.2		2.97092	12392.5		10.9713	12050.6		3.97221	12577.4		11.9714	11890.4		4.97289	11933.2		12.9714	11899.3		5.97286	12109.5		13.9717	11978.1		6.97251	12000		14.9721	12044.1		7.97165	11357.9		15.9723	12087.3
0.972644	16264.1		8.97481	12325.9		1.97227	13598		9.97296	12138.4		2.97259	12784.9		10.9724	12288.2		3.97367	12938.5		11.9729	12218.4		4.97428	11909.8		12.9731	12200.7		5.9746	12075.6		13.9735	12248.3		6.97369	12151.9		14.9732	12201.8		7.97304	11323.7		15.9739	12180.5
0.974449	16512		8.97592	12520.3		1.97324	13830.2		9.97421	12266.4		2.9737	12800		10.9741	12456		3.97464	12936.9		11.9746	12276.9		4.97518	12103.7		12.9748	12357.3		5.97599	12266.9		13.9747	12329.5		6.9755	12096.2		14.9748	12266.1		7.97401	11706.6		15.9755	12428.9
0.975977	16781.8		8.97696	12557.1		1.97435	14037.9		9.97595	12316.9		2.97467	13042.2		10.9756	12671.7		3.97582	13105		11.9759	12429.9		4.97643	12183.1		12.9759	12588		5.97689	12417.8		13.9756	12468.8		6.97703	12178.9		14.9765	12253.3		7.97519	11846.8		15.9768	12557.3
0.976949	17042.5		8.97849	12672.4		1.97602	14101.8		9.97748	12509.3		2.97613	13166.3		10.9766	12753		3.97756	13124.3		11.9768	12561.5		4.97823	12491.6		12.9769	12676.6		5.97821	12413.8		13.977	12596.9		6.978	12345.1		14.9777	12394.6		7.97685	11848.7		15.9777	12576.7
0.97806	16970.1		8.98022	12840.4		1.97762	14190.6		9.97845	12719.9		2.97787	13210.6		10.9777	12804.2		3.97915	13173.6		11.9782	12614		4.97969	12696.3		12.9785	12819.2		5.98002	12523.1		13.9788	12730.9		6.97918	12519.1		14.9786	12749.9		7.97852	11921.8		15.9791	12740.8
0.979866	17165.6		8.98141	12955.7		1.97873	14354.3		9.97956	12749.4		2.97926	13218.4		10.9793	12882.3		3.98013	13232.9		11.98	12737.6		4.9806	12702.7		12.9802	12902.3		5.98147	12621.3		13.9801	12846.1		6.98092	12537.6		14.9801	12855.5		7.97956	12068.7		15.9809	13039.9
0.981463	17264.2		8.98231	12925.3		1.97977	14631.7		9.9813	12810.8		2.98016	13479.6		10.981	13057.3		3.98117	13606.5		11.9814	12893.3		4.98185	12649		12.9814	13009.1		5.98231	12882		13.981	12888.3		6.98251	12536.1		14.9819	12799.7		7.98061	12121.7		15.9823	13136.8
0.982296	17422.8		8.9839	12911.9		1.9813	14654		9.98289	12989.2		2.98148	13696.8		10.9821	13087		3.9829	13763.4		11.9823	12871.4		4.98365	12687.5		12.9823	13201.4		5.98363	12903.2		13.9824	12915.6		6.98342	12759.2		14.9831	12872.8		7.98227	12094.9		15.9832	13176.5
0.983269	17579.9		8.98571	13069.8		1.98303	14696.5		9.98394	13095		2.98321	13668.7		10.9831	13200.2		3.98457	13723.7		11.9837	13029.8		4.98511	12951.2		12.9839	13096.5		5.98543	12868.8		13.9842	13088.4		6.98439	12859.2		14.984	13064.5		7.98394	12270.8		15.9846	13122.7
0.984935	17748		8.98682	13351.3		1.98421	14843.2		9.98505	13170		2.98474	13838.2		10.9846	13288.2		3.98547	13838.1		11.9855	13008.6		4.98594	13071.1		12.9857	13161.1		5.98689	12979.1		13.9856	13181.2		6.98598	12848.5		14.9855	13060.5		7.98505	12381.4		15.9864	13239.3
0.986463	17713.1		8.98766	13290.6		1.98519	15012.1		9.98671	13177.2		2.98564	13907.3		10.9865	13281.5		3.98638	13879.1		11.9868	13210.5		4.98705	13100.2		12.9867	13324		5.98772	13152		13.9864	13383.6		6.98758	13019.8		14.9873	13167		7.98609	12444.9		15.9877	13359.4
0.987574	17803.1		8.98904	13336.8		1.98671	15124.7		9.98838	13285.3		2.9869	13916.3		10.9876	13439		3.98797	13913.7		11.9875	13408		4.98872	12990.3		12.9876	13337.4		5.98884	13085.2		13.9876	13314		6.98869	12971.1		14.9885	13323.5		7.98769	12456.8		15.9884	13364.2
0.988616	17992		8.99078	13503.8		1.98852	15045		9.98935	13457.5		2.9887	14000.2		10.9885	13470.1		3.98964	14163.3		11.9888	13441.8		4.99025	13141.4		12.989	13292.2		5.9905	13015.9		13.9893	13235.8		6.98967	12938.8		14.9893	13473.6		7.98942	12508.7		15.9897	13413
0.990144	18093.3		8.99203	13583.4		1.98963	15102.2		9.99026	13389.7		2.99016	14181.8		10.9901	13493.7		3.99075	14299		11.9905	13377.8		4.99129	13193.4		12.9907	13496.5		5.99196	13284.1		13.9908	13418.2		6.99119	13006.9		14.9907	13423.9		7.99047	12715.5		15.9914	13419.5
0.99188	18152.2		8.993	13584.2		1.99046	15271		9.99178	13435.2		2.99099	14161.8		10.9919	13577.6		3.99172	14091.9		11.9919	13363.1		4.9924	13232.4		12.9919	13515		5.993	13344.8		13.9917	13498.9		6.99293	13171.1		14.9923	13453.6		7.9913	12773.8		15.9927	13531
0.99313	18402.6		8.99432	13631.8		1.99185	15169.4		9.99338	13431.1		2.99203	14158.4		10.993	13776.5		3.99325	14111.7		11.9929	13367.6		4.994	13165		12.9929	13589.4		5.99411	13265.7		13.9928	13303.2		6.99425	13164.5		14.9937	13485.1		7.99276	12713		15.9937	13681.2
0.994033	18245.6		8.99613	13783.6		1.99359	15238.4		9.99456	13530.4		2.9937	14295.1		10.9939	13761.3		3.99506	14086.5		11.9941	13275.6		4.99567	13362		12.9942	13488.8		5.99571	13251.2		13.9946	13445.5		6.99515	13157		14.9946	13389.1		7.99449	12806.8		15.995	13533.8
0.995491	18129.8		8.99759	13547.3		1.99491	15291.8		9.99553	13480.4		2.99523	14309		10.9952	13763.6		3.99631	14124.3		11.9958	13400.8		4.99678	13420.3		12.996	13576.3		5.99738	13303.3		13.9962	13660.2		6.99654	13188.3		14.9959	13435.5		7.99567	12759.4		15.9967	13495.2
0.997296	18137.7		8.99849	13630.4		1.99581	15370.5		9.99699	13543.2		2.99627	14281.8		10.9969	13676.4		3.99721	14227.1		11.9974	13417.7		4.99775	13412.3		12.9975	13603.3		5.99849	13240.5		13.9972	13693.8		6.99835	13339.3		14.9976	13494.5		7.99658	12719.9		15.9982	13639.6
0.998616	18396.3		8.99967	13654.8		1.99713	15343.4		9.9988	13622.6		2.99738	14333.7		10.9983	13765.7		3.9986	14302.8		11.9984	13339.2		4.99928	13292.5		12.9984	13478.8		5.99953	13225.3		13.9983	13639.8		6.99967	13206		14.9992	13402.2		7.99797	12743.8		15.9993	13670.3
0.999519	18336.4		9.00147	13568.8		1.99887	15439.9		10.0001	13641.5		2.99898	14209.5		10.9992	13836.7		4.0004	14253.3		11.9995	13367		5.00108	13372.5		12.9996	13598.7		6.00106	13429.3		13.9999	13698.8		7.00057	13215.8		15.0002	13492.2		7.99977	12692.5		16.0003	13681.5
1.00091	18317.6		9.003	13590.3		2.00039	15285.8		10.001	13490.9		3.00064	14265.9		11.0005	13975.2		4.00172	14232		12.0011	13506		5.00226	13459.1		13.0013	13721.4		6.00279	13286.4		14.0016	13735.1		7.00196	13226.1		15.0012	13521.7		8.00116	12753.7		16.0021	13637.4
1.00278	18321.8		9.00397	13469.9		2.0013	15417.6		10.0023	13447.2		3.00183	14308.7		11.0022	13918.4		4.00263	14096.3		12.0028	13534.9		5.00317	13401		13.0029	13804.6		6.00397	13257.5		14.0027	13678.4		7.00376	13104.5		15.003	13686.1		8.00213	12869.2		16.0037	13462.4
1.00403	18381.3		9.00509	13607.4		2.00248	15442.1		10.0041	13545.9		3.0028	14451		11.0037	13738.5		4.00401	14207.8		12.0039	13488.1		5.00469	13474.2		13.0039	13684.2		6.00495	13344.7		14.0037	13532.8		7.00515	13200.7		15.0046	13494.2		8.00338	12857		16.0048	13503.3
1.0048	18285.2		9.00682	13682.9		2.00421	15231.6		10.0055	13468.8		3.00426	14297.3		11.0047	13598.4		4.00582	14203.8		12.0048	13585.3		5.0065	13445.8		13.005	13687.7		6.00647	13258.1		14.0053	13621.5		7.00592	13329.4		15.0057	13514.7		8.00519	12783		16.0057	13590.6
1.00605	18137		9.00849	13588.9		2.00581	15183.5		10.0064	13480.8		3.00606	14136.2		11.0058	13481.3		4.00714	14105.5		12.0065	13391		5.00768	13273.1		13.0067	13591		6.00828	13277.1		14.007	13691.9		7.0071	13149.5		15.0067	13424.7		8.00672	12685.3		16.0075	13549.1
1.00778	18255.3		9.00939	13438.1		2.00678	15291.5		10.0078	13610		3.00724	14064.5		11.0076	13541.1		4.00797	14002.4		12.0082	13391.3		5.00844	13177.8		13.0083	13615.8		6.00946	13235		14.0081	13471.8		7.00883	13053.1		15.0084	13382.8		8.00762	12629		16.0092	13456.2
1.00924	18252.9		9.01029	13388.1		2.00789	15285.9		10.0096	13488.4		3.00815	14210.9		11.0092	13634.1		4.00915	14014.1		12.0093	13417.5		5.00983	13350.9		13.0092	13467.1		6.01022	13081		14.0089	13423		7.01022	13250.5		15.0101	13291.3		8.0088	12602.7		16.0102	13409.4
1.01014	17974.9		9.01189	13455.4		2.00963	15303.4		10.011	13296.7		3.00967	14114.4		11.0102	13576.6		4.01082	14082.9		12.0101	13399.3		5.01157	13304		13.0102	13455.9		6.01161	13018.9		14.0103	13487.5		7.01119	13217.9		15.011	13327.8		8.0106	12660.2		16.011	13427.5
1.01132	17943.3		9.01356	13299.6		2.0113	15205.8		10.0119	13335.4		3.01155	14037.9		11.0112	13538.5		4.01228	13999.9		12.0116	13358.5		5.01289	13161.3		13.0118	13464.2		6.01328	13188		14.0121	13569.4		7.01237	13159.1		15.0119	13116.2		8.01213	12557.7		16.0125	13363.1
1.01306	17802.6		9.01467	13272.8		2.01213	15074.5		10.013	13209		3.01273	13880.8		11.013	13391.1		4.01332	13930.2		12.0133	13280.1		5.01379	12952.4		13.0134	13468.7		6.0146	13097.7		14.0133	13392.2		7.01404	13074.7		15.0135	13215.5		8.01297	12432.9		16.0142	13338.5
1.01466	17652.7		9.01564	13219.1		2.0131	15116.8		10.0146	13278.1		3.01349	13908.7		11.0146	13313.6		4.01443	13926.7		12.0145	13204.1		5.01511	12838.1		13.0144	13278.1		6.0155	12918.2		14.0142	13133.2		7.01564	12959.3		15.0151	13255.7		8.01401	12449.6		16.0154	13262.2
1.0157	17666.6		9.01717	13146.1		2.0147	15009.3		10.0161	13249.3		3.01481	13947		11.0155	13349.9		4.0161	13879.1		12.0154	13144.4		5.01685	12931.2		13.0155	13239.2		6.01682	12899.2		14.0156	13152.5		7.01668	12907.2		15.0163	13110.2		8.0156	12536.3		16.0164	13138
1.01674	17630.6		9.01898	13062.3		2.0163	14860.8		10.0171	13117.6		3.01655	13937.2		11.0165	13166.4		4.01776	13708.8		12.0169	13242		5.0183	12754.1		13.017	13189.2		6.01856	12915.9		14.0174	13086.3		7.01772	12718.5		15.0172	12831.3		8.0172	12334.6		16.0178	13152.2
1.01841	17530.7		9.02022	12928.1		2.01741	14685.7		10.0182	12975.7		3.01787	13827.3		11.018	13134.1		4.01881	13596.5		12.0186	12930		5.01928	12539.2		13.0188	13083.4		6.02009	12666.5		14.0187	12959		7.01939	12648.6		15.0187	12755.1		8.01824	12252.5		16.0196	12930.1
1.02007	17369.1		9.02113	12852.8		2.01838	14671.2		10.0198	12878.6		3.01877	13702.8		11.0197	13037.1		4.01978	13461.8		12.02	12722.4		5.02046	12587.8		13.02	12916.7		6.02106	12577.4		14.0197	12908.6		7.02112	12443.5		15.0205	12837.6		8.01929	12073.9		16.0209	12846.7
1.02112	17224		9.02252	12622.3		2.01991	14678.9		10.0216	12823.5		3.02002	13471.2		11.0208	12927		4.02138	13345.1		12.0209	12715.8		5.02212	12616.7		13.0209	12926.7		6.02217	12547.3		14.0209	12889.2		7.02223	12399		15.0218	12697.4		8.02088	12028.8		16.0218	12778.6
1.02209	17110.5		9.02432	12447.2		2.02164	14413		10.0227	12631.1		3.02176	13440.3		11.0219	12939.5		4.02311	13170.1		12.0222	12513		5.02372	12342		13.0223	12792.9		6.0239	12448.1		14.0227	12817.8		7.02321	12370.7		15.0227	12598.7		8.02262	11962.2		16.0231	12544.5
1.02375	17082.8		9.02564	12417.4		2.02289	14150.5		10.0237	12472.8		3.02335	13330		11.0233	12726.1		4.02429	13060.2		12.0239	12515.7		5.02476	12188.2		13.0242	12668.3		6.0255	12218.9		14.0242	12708		7.0248	12141.8		15.024	12656		8.02387	11853.3		16.0249	12490.3
1.02556	16907		9.02654	12284.6		2.02387	14041.4		10.0252	12268.5		3.02433	13182.6		11.0251	12638.6		4.0252	12860.4		12.0255	12381.8		5.0258	12129.6		13.0255	12515.1		6.02654	12021.6		14.0252	12544.8		7.02661	12009.1		15.0258	12239.2		8.02477	11763		16.0263	12342.7
1.02653	16532.8		9.02793	12055.8		2.02525	14024.7		10.027	12226.3		3.02544	12876.8		11.0264	12372.9		4.02679	12833.9		12.0264	12326.5		5.02754	12004.9		13.0264	12338.2		6.02759	11938.3		14.0263	12320.3		7.02765	11824		15.0272	12206		8.02623	11571.7		16.0273	12231
1.02737	16520.3		9.02974	11910.8		2.02699	13940.4		10.0282	12228.8		3.02717	12905.3		11.0273	12236		4.02853	12747.9		12.0275	12243		5.02921	11880.5		13.0278	12323.4		6.02925	11905.1		14.0281	12162.6		7.02848	11795.3		15.0281	12116.7		8.02804	11329.1		16.0285	12158.5
1.02889	16301		9.03106	11580.2		2.02838	13723.6		10.0291	12043.6		3.02877	12631.1		11.0286	12110.6		4.02964	12579		12.0294	12079.5		5.03018	11659.8		13.0296	12108		6.03092	11731.3		14.0296	11969.3		7.02994	11713.1		15.0294	12034.2		8.02936	11261.3		16.0303	12036.3
1.03056	16062		9.03189	11520		2.02928	13535.8		10.0306	11824.4		3.02974	12414.1		11.0304	11977.8		4.0304	12308.8		12.0309	11745.5		5.03108	11446.5		13.0309	11714.9		6.03189	11629.9		14.0305	11885.8		7.03161	11501.6		15.0312	12013.5		8.03026	11103.1		16.0318	11689.6
1.03174	15757.2		9.03307	11476.4		2.03067	13452.4		10.0325	11626.2		3.03078	12331.8		11.0318	11792.2		4.03186	12177.5		12.0318	11572.1		5.03261	11404		13.0317	11643.2		6.03286	11405.4		14.0315	11749.5		7.03279	11292.2		15.0326	11599.6		8.03165	11022.6		16.0326	11400.8
1.03271	15419.6		9.03481	11426.7		2.03248	13130		10.0337	11477.1		3.03252	12188.4		11.0327	11645.9		4.0336	12019.4		12.0328	11475.3		5.03421	11324.8		13.0329	11630		6.03439	11243.4		14.0332	11542.9		7.03376	11113		15.0335	11335		8.03345	10892.7		16.0336	11311.2
1.03417	15224.8		9.03627	11226.4		2.03387	12937.4		10.0344	11332.2		3.03419	11873.5		11.034	11633.5		4.03478	11717.5		12.0345	11408.9		5.03539	11069.6		13.0346	11544.5		6.03599	10939.8		14.0347	11392.4		7.03515	10982.3		15.0346	11290.9		8.03477	10650.5		16.0353	11176.9
1.03591	14930.6		9.03724	10976.4		2.03463	12660.3		10.0358	11211.1		3.03516	11584.9		11.0358	11401		4.03575	11694.5		12.036	11211.4		5.03636	10808.3		13.036	11212.1		6.03717	10731.4		14.0358	11285		7.03689	10814.8		15.0362	11081.1		8.03554	10463.3		16.0368	11164.4
1.0373	14626.2		9.03835	10626.8		2.03581	12522.7		10.0375	11005.4		3.03606	11634.4		11.0373	11003.1		4.03707	11521.1		12.037	10938.6		5.03782	10813.1		13.037	10946.2		6.03814	10634.7		14.0368	11016.1		7.03828	10470.8		15.0378	10890.1		8.03679	10231.3		16.0379	10949.6
1.0382	14289.4		9.04009	10474.6		2.03755	12339.7		10.0388	10726.4		3.03759	11446.7		11.038	10821.2		4.03881	11268.1		12.038	10725.8		5.03955	10425		13.0382	10716.3		6.0396	10467.7		14.0383	10969.9		7.03925	10287.8		15.0387	10573.4		8.03852	10038.4		16.039	10702.3
1.03952	14217.4		9.04168	10225.2		2.03901	12042.8		10.0398	10545.2		3.03926	11210.1		11.0392	10755.1		4.04033	10943		12.0396	10592.9		5.04087	10067.5		13.0398	10536.9		6.04133	10247.5		14.0401	10675.1		7.0405	10143.9		15.0398	10351.9		8.03984	9820.88		16.0406	10568.7
1.04125	14022.5		9.04272	9998.99		2.03991	11843.7		10.0411	10422.5		3.04037	10990.2		11.0409	10686.8		4.04124	10600		12.0414	10350.3		5.04178	9940.5		13.0415	10304		6.04265	9985.23		14.0412	10336.8		7.04223	9856.59		15.0415	10232.8		8.04081	9702.68		16.0423	10239.9
1.04278	13567.9		9.04377	9810.81		2.04109	11570.4		10.0428	10210.3		3.04134	10755.7		11.0424	10292.7		4.04242	10580.7		12.0425	10099.6		5.04317	9874.32		13.0426	10005.5		6.04356	9761.87		14.0422	10167		7.04376	9640.16		15.0432	10090.8		8.04199	9476.16		16.0434	9857.56
1.04369	13274.1		9.04543	9679.99		2.04275	11358.7		10.0444	9956		3.04287	10495.8		11.0434	10075.2		4.04422	10416.2		12.0435	9823.7		5.0449	9685.79		13.0435	9770.46		6.04488	9599.57		14.0437	10019.9		7.04474	9414.12		15.0443	9654.5		8.04373	9346.63		16.0443	9687.09
1.04487	13015.5		9.0471	9482.05		2.04442	11157.5		10.0453	9602.72		3.0446	10285.9		11.0445	9841.92		4.04575	10087.3		12.045	9682.89		5.04629	9421.57		13.0452	9668.76		6.04668	9282.72		14.0455	9738.41		7.04585	9311.77		15.0453	9481.21		8.04533	9151.87		16.0459	9768.02
1.04667	12861.8		9.04821	9234.83		2.04546	10791.3		10.0465	9375		3.04585	9953.64		11.0462	9614.87		4.04672	9898.15		12.0469	9384.89		5.04726	9128.56		13.0469	9556.79		6.04807	8989.11		14.0467	9425.64		7.04765	9133.68		15.0468	9479.56		8.04637	8761.15		16.0477	9555.46
1.04827	12382.7		9.04918	9044.14		2.04644	10513.8		10.0482	9322.45		3.04683	9807.19		11.0478	9394.42		4.0479	9706.12		12.0481	9130.26		5.04851	9050.43		13.048	9388.03		6.04897	8782.85		14.0476	9176.5		7.04925	8765.62		15.0485	9133.77		8.04741	8584.82		16.0489	9250.1
1.0491	11923.8		9.05078	8855.34		2.0481	10541.8		10.0498	8991.68		3.04814	9662.89		11.049	9061.32		4.04964	9535.69		12.049	8952.76		5.05039	8765.43		13.0489	9108.76		6.05029	8754.16		14.0491	9097.9		7.05015	8549.48		15.0497	8853.7		8.04908	8538.11		16.0498	9078.59
1.05014	11737.9		9.05259	8559.43		2.04984	10119		10.0508	8625.84		3.04995	9426.87		11.0499	8947.45		4.05117	9143.68		12.0505	8866.5		5.05178	8393.85		13.0505	8883.67		6.0521	8478.11		14.0509	8916.44		7.05112	8504.02		15.0507	8553.24		8.05081	8184.06		16.0513	8739.36
1.05181	11549.2		9.05363	8183.62		2.05095	9851.53		10.0519	8564.16		3.05134	9103.41		11.0515	8813.48		4.05207	8820.97		12.0523	8629.12		5.05261	8117.31		13.0523	8578.35		6.05356	8186.99		14.0521	8588.88		7.05272	8288.71		15.0522	8352.75		8.05186	7947.64		16.0531	8523.8
1.05334	11170.6		9.05446	7996.02		2.05192	9631.07		10.0537	8398.47		3.05231	8830.33		11.0532	8449.91		4.05304	8684.74		12.0535	8200.22		5.05372	8143.37		13.0534	8346.83		6.05432	7882.53		14.0529	8454.79		7.05432	7941.02		15.054	8261.19		8.05283	7858.7		16.0543	8330.37
1.05438	10941.7		9.05592	7912.52		2.05352	9532.2		10.0553	8168.35		3.05356	8636.68		11.0544	8124.29		4.05471	8537.49		12.0543	7974.32		5.05539	7992.27		13.0542	8203.03		6.05543	7841.04		14.0542	8300.93		7.05536	7823.4		15.0551	7977.75		8.05456	7729.53		16.0551	8153.67
1.05542	10777.9		9.05759	7652.88		2.05532	9194.05		10.0562	7906.12		3.05544	8499.47		11.0553	7964.33		4.05624	8200.12		12.0555	7974.55		5.05685	7610.12		13.0557	8059.08		6.05717	7725.33		14.0559	8105.5		7.0564	7654.48		15.0559	7760.73		8.0563	7438.43		16.0564	7963.47
1.05702	10421.4		9.05884	7494.79		2.05637	8790.48		10.0571	7621.52		3.05683	8202.5		11.0569	7953.39		4.05735	8047.57		12.0573	7769.66		5.05789	7454.32		13.0574	7741.52		6.05863	7462.45		14.0574	7757.65		7.058	7505.96		15.0573	7637.14		8.05727	7064.71		16.0582	7616.6
1.05875	10047.6		9.05981	7272.12		2.0572	8553.4		10.0587	7503.28		3.05759	7967.96		11.0587	7635.09		4.05832	7797.21		12.0587	7463.08		5.059	7339.12		13.0586	7547.56		6.05967	7198.23		14.0583	7571.92		7.05967	7163.62		15.059	7364.88		8.05811	6907.15		16.0595	7377.9
1.05994	9576.01		9.06113	7231.24		2.05866	8462.33		10.0603	7273.53		3.05877	7790.89		11.0599	7330.6		4.05985	7665.94		12.0596	7245.65		5.06067	7088.91		13.0595	7327.81		6.06078	7082.3		14.0595	7441.34		7.06092	6933.55		15.0603	7150.86		8.05963	6826.19		16.0604	7174.65
1.06091	9352.83		9.06293	6995.85		2.06039	8218.17		10.0614	7055.11		3.06044	7643.88		11.0607	7183.03		4.06165	7401.03		12.0608	7114.36		5.06233	6834.61		13.0609	7081.67		6.06245	6970.5		14.0612	7210.88		7.06182	6872.04		15.0613	6944.99		8.0613	6644.48		16.0617	7049.57
1.06237	9334.99		9.06432	6708.74		2.06157	7880.81		10.0624	6835.79		3.0619	7317.22		11.0621	7171.39		4.0629	7199.99		12.0625	6927.29		5.06344	6592.76		13.0627	6900.22		6.06411	6620.06		14.0628	6947.09		7.06328	6732.75		15.0626	6794.07		8.06248	6411.14		16.0634	6909.98
1.06417	8901.12		9.06529	6474.59		2.06255	7760.04		10.0639	6638.29		3.06287	7044.6		11.0637	6926.8		4.06381	6898.15		12.0641	6654.48		5.06449	6351.59		13.0641	6625.59		6.06515	6312.01		14.0638	6603.3		7.06508	6439.8		15.0644	6553.7		8.06338	6191.29		16.0649	6580.25
1.06542	8541.94		9.06654	6266.04		2.06387	7558.03		10.0657	6467.78		3.06398	6852.18		11.0651	6612.78		4.06526	6844.31		12.0651	6386.11		5.06601	6224.87		13.0651	6455.19		6.0662	6156.21		14.0649	6543.26		7.0664	6091.82		15.0658	6321.39		8.06484	6120.55		16.0659	6361.83
1.06632	8333.78		9.06828	6150.29		2.06567	7220.74		10.067	6266.01		3.06571	6722.39		11.066	6268.52		4.067	6637.24		12.0662	6277.84		5.06775	6000.33		13.0662	6345.45		6.06779	6063.64		14.0666	6303.89		7.06731	5974.89		15.0668	6030.23		8.06658	5962.47		16.0671	6222.03
1.06785	8228.17		9.06981	5923.77		2.06706	6891.32		10.0679	6073.85		3.06738	6483.8		11.0674	6230.15		4.06832	6279.24		12.0679	6244.25		5.06893	5861.41		13.068	6010.84		6.06953	5760.89		14.0683	6031.14		7.06869	5851.14		15.068	5895.54		8.06797	5740.94		16.0688	5977.03
1.06966	7916.21		9.07078	5621.42		2.06803	6737.78		10.0693	5989.54		3.06849	6192.86		11.0691	5993.47		4.06922	5989.91		12.0696	5887.22		5.06983	5679.82		13.0696	5752.33		6.07064	5467.42		14.0693	5832.93		7.07057	5715.04		15.0697	5717.55		8.06894	5410.35		16.0704	5749
1.07091	7538.02		9.07189	5480.47		2.06921	6626.18		10.0711	5749.02		3.06946	6027.57		11.0706	5807.34		4.07061	5837.97		12.0706	5635.61		5.07136	5463.53		13.0705	5547.1		6.07161	5394.85		14.0703	5633.87		7.07182	5425.27		15.0713	5515.33		8.07019	5400.7		16.0714	5636.7
1.07167	7224.66		9.0737	5265.31		2.07102	6319.4		10.0724	5401.67		3.07099	5881.52		11.0715	5589.89		4.07249	5704.61		12.0716	5440.63		5.07324	5312.38		13.0717	5460.31		6.07321	5360.22		14.0719	5576.48		7.07258	5189.1		15.0723	5329.81		8.07199	5265.59		16.0725	5397.21
1.07299	7325.03		9.07529	4998.28		2.07255	6032.84		10.0733	5252.53		3.07273	5633.63		11.0727	5495.45		4.07381	5463.38		12.0733	5222.41		5.07435	5024.71		13.0735	5255.93		6.07495	5058.28		14.0737	5331.27		7.0739	5100.08		15.0734	5150.18		8.07345	5020.88		16.0742	5235.36
1.07473	7013.08		9.07613	4881.63		2.07352	5717.38		10.0747	5260.3		3.07391	5311.92		11.0744	5293.75		4.07457	5255.77		12.075	4983.12		5.07511	4811.77		13.0751	4968.65		6.07606	4764.13		14.0747	5049.79		7.07564	5046.9		15.0751	4977.96		8.07436	4767.83		16.0759	5076.37
1.07612	6558.22		9.07717	4795.08		2.07463	5660.86		10.0765	5023.13		3.07488	5129.06		11.076	4989.07		4.07582	5223.05		12.076	4706.31		5.0765	4777.43		13.0759	4754.82		6.07689	4723.11		14.0756	4959.04		7.07696	4700.94		15.0767	4687.88		8.0756	4601.14		16.0768	4883.62
1.07709	6330.89		9.07877	4638.81		2.07644	5519.61		10.0779	4732.02		3.07641	5029.5		11.0771	4759.99		4.07749	4979.9		12.0769	4664.3		5.07824	4598.39		13.0769	4678.46		6.07828	4571.41		14.077	4823.29		7.07793	4524.33		15.0777	4444.98		8.07748	4396.75		16.0777	4708.71
1.07827	6154.09		9.08036	4313.56		2.07803	5254.68		10.0787	4484.32		3.07821	4785.17		11.0781	4610.78		4.07895	4644.01		12.0784	4549.67		5.07955	4361.18		13.0785	4589.32		6.08002	4370.8		14.0787	4590.84		7.07918	4396.69		15.0786	4401.76		8.07894	4199.74		16.0793	4568.56
1.08	5903.66		9.08148	4038.33		2.07887	4998.85		10.0798	4349.29		3.07933	4621.51		11.0799	4433.29		4.07992	4512.5		12.08	4262.71		5.08046	4139.6		13.0801	4410.88		6.08127	4212.24		14.0799	4399.73		7.08085	4161.58		15.0802	4314.89		8.07977	4038.34		16.0809	4330.16
1.0816	5613.02		9.08245	3989.33		2.07984	4892.83		10.0816	4253.91		3.08016	4412.98		11.0815	4185.98		4.08103	4341.83		12.0812	4049.68		5.08178	4003.99		13.0811	4123.39		6.08224	3923.87		14.0808	4166.89		7.08244	3968.83		15.0818	4096.31		8.08081	3955.76		16.0821	3961.59
1.08257	5297.3		9.08397	3856.65		2.08151	4790.32		10.083	3998.72		3.08155	4368.49		11.0824	4024.51		4.0827	4173.07		12.0822	3919.42		5.08351	3835		13.0821	3976.03		6.08356	3796.72		14.0823	4029.83		7.08342	3793.21		15.083	3808.13		8.08248	3788.33		16.083	3803.52
1.08369	5061.09		9.08578	3622.68		2.08303	4459.4		10.084	3815.62		3.08321	4181		11.0834	3880.05		4.08436	3954.9		12.0837	3752.97		5.08497	3678.68		13.0837	3824.66		6.08529	3664.56		14.084	3916.04		7.08453	3608.9		15.0839	3650		8.08401	3571.52		16.0845	3721.18
1.08542	4888.04		9.08703	3449.31		2.08414	4141.63		10.0851	3695.65		3.08453	3883.43		11.085	3779.58		4.0854	3726.03		12.0855	3697.39		5.08601	3420.6		13.0855	3606.08		6.08675	3400.72		14.0854	3684.33		7.08619	3416.16		15.0854	3593		8.08505	3414.9		16.0862	3570.52
1.08702	4644.87		9.08793	3239.98		2.08519	3994.23		10.0869	3514.1		3.08551	3701.8		11.0867	3605.29		4.08644	3528.13		12.0868	3457.11		5.08719	3276.06		13.0867	3449.44		6.08765	3225.74		14.0863	3410.86		7.08786	3315.58		15.0872	3337.25		8.08609	3279.19		16.0875	3352.91
1.08806	4303.78		9.08932	3121.35		2.08671	3898.73		10.0885	3339.82		3.08683	3562.95		11.0877	3356.57		4.08804	3353.64		12.0877	3253.96		5.08886	3118.84		13.0876	3266.85		6.08884	3106.16		14.0876	3279.85		7.08897	3061.49		15.0885	3076.43		8.08769	3181.57		16.0884	3146.37
1.0891	4139.54		9.0912	2988.11		2.08845	3597.4		10.0896	3093.34		3.08856	3340.02		11.0887	3226.72		4.08978	3215.19		12.089	3115.72		5.09046	3005.06		13.0891	3083.35		6.09057	3002.86		14.0894	3177.98		7.08994	2935.2		15.0894	2933.76		8.08942	2951.18		16.0898	3058.33
1.09077	3998.46		9.09252	2681.85		2.08963	3296.99		10.0906	2922.01		3.09002	3162.56		11.0902	3099.12		4.09089	3051.51		12.0908	2923.43		5.09143	2795		13.0909	2907.39		6.09217	2820.21		14.0909	2923.87		7.09161	2827.79		15.0907	2845.54		8.09054	2698.55		16.0916	2923.05
1.0925	3686.69		9.09335	2543.78		2.0906	3215.75		10.0922	2835.43		3.09099	2925.42		11.092	2846.32		4.09186	2925.75		12.0922	2742.39		5.09254	2604.95		13.0921	2733.42		6.09314	2632.65		14.0918	2683.79		7.09335	2614.73		15.0926	2656.23		8.09151	2490.66		16.093	2657.49
1.09348	3339.83		9.09474	2509.05		2.09206	3118.74		10.0939	2593.38		3.09217	2753.81		11.0933	2642.02		4.09346	2808.31		12.0932	2532.02		5.09428	2405.67		13.093	2531.99		6.09425	2501.18		14.093	2596.23		7.09432	2323.32		15.0939	2414.32		8.09304	2440.06		16.0939	2516.69
1.09431	3195.57		9.09661	2240.94		2.09387	2827.55		10.095	2397.72		3.09391	2600.3		11.0942	2510.58		4.09526	2528.47		12.0944	2425.59		5.09594	2215.36		13.0945	2428.18		6.09599	2287.76		14.0948	2383.43		7.09522	2184.13		15.0948	2233.42		8.09484	2226.72		16.0952	2443.95
1.09584	3078.37		9.09786	2016.86		2.09519	2571.56		10.096	2251.97		3.09551	2437.14		11.0956	2377.81		4.09631	2310.49		12.0962	2252.87		5.09678	2090.16		13.0963	2266.63		6.09765	2101.76		14.0963	2225.37		7.09668	2167.97		15.0962	2157.2		8.09602	1983.95		16.097	2242.66
1.0975	2851.02		9.09863	1909.09		2.09609	2445.08		10.0976	2150.26		3.09648	2256.69		11.0974	2193.2		4.09707	2173.3		12.0977	2048.42		5.09775	1948.6		13.0976	2062		6.09856	1968.52		14.0971	2057.86		7.09835	1941.01		15.098	1988.16		8.09692	1907.19		16.0984	1990.73
1.09869	2579.09		9.09988	1894.22		2.09748	2340.7		10.0994	2046.92		3.09759	2135.43		11.0987	2002.08		4.09853	2049.68		12.0985	1886.14		5.09935	1880.2		13.0984	1891.28		6.09953	1788.2		14.0982	1945.31		7.09953	1788.21		15.0993	1763.76		8.09845	1835.32		16.0993	1837.82
1.09966	2467.1		9.10161	1771.26		2.09928	2182.61		10.1005	1840.8		3.09933	1969.43		11.0996	1825.91		4.10026	1924.73		12.0996	1809.02		5.10094	1737.68		13.0996	1822.73		6.10113	1666.92		14.0999	1853.22		7.1005	1697.58		15.1001	1642.33		8.10026	1659.8		16.1004	1738.24
1.10112	2339.53		9.103	1571.52		2.1006	1939.25		10.1013	1704.96		3.10099	1735.32		11.101	1759.68		4.10145	1709.52		12.1013	1649.63		5.10205	1571.37		13.1014	1693		6.10272	1556.48		14.1014	1698.13		7.10189	1583.55		15.1012	1585.2		8.10151	1508.77		16.1021	1673.45
1.10285	2103.63		9.10397	1432.14		2.10137	1776.82		10.1028	1569.02		3.10183	1597.66		11.1028	1636.41		4.10242	1570.62		12.1028	1537.92		5.10303	1447.89		13.1028	1566.82		6.10377	1424.82		14.1024	1531.41		7.10369	1439.09		15.103	1482.38		8.10227	1426.03		16.1035	1484.89
1.10417	1845.43		9.10515	1316.45		2.10262	1737.69		10.1044	1444.92		3.1028	1565.69		11.1042	1466.02		4.10381	1470.32		12.1038	1410.61		5.10455	1335.75		13.1037	1428.31		6.10481	1331.22		14.1035	1441.59		7.10508	1293.31		15.1045	1316.13		8.10359	1389.68		16.1046	1286.79
1.10514	1712.92		9.10689	1204.27		2.10435	1586.76		10.1057	1315.77		3.10439	1480.44		11.105	1327.68		4.10554	1337		12.1049	1363.94		5.10636	1236.84		13.1049	1308.88		6.10633	1241.4		14.1051	1358.22		7.10599	1179.27		15.1055	1202.42		8.10533	1225.56		16.1057	1214.13
1.10646	1638.93		9.10849	1105		2.10574	1360.8		10.1067	1200.73		3.10599	1338.86		11.1062	1239.97		4.10693	1177.3		12.1065	1279.59		5.10761	1065.76		13.1067	1172.05		6.10807	1108.23		14.1068	1198.41		7.10724	1094.33		15.1066	1141.65		8.10665	1054.5		16.1073	1155.46
1.1082	1498.87		9.10953	978.059		2.10671	1246.43		10.108	1115.19		3.1071	1168.6		11.1079	1137.17		4.1079	1064.96		12.1082	1113.12		5.10851	964.098		13.1083	1044.55		6.10932	1013.33		14.108	1093.5		7.10904	1008.17		15.1082	1059.48		8.10755	967.582		16.109	1058.47
1.10966	1284.21		9.11057	901.699		2.10789	1171.52		10.1098	1023.26		3.10808	1105.81		11.1094	977.283		4.10915	1006.65		12.1094	969.875		5.1099	922.796		13.1092	954.421		6.11022	893.805		14.1089	1023.08		7.1105	866.657		15.1099	904.786		8.1088	861.241		16.1101	961.277
1.11056	1143		9.11224	808.365		2.10963	1079.41		10.1112	920.947		3.1096	1009.11		11.1103	887.414		4.11096	971.73		12.1103	858.551		5.11171	846.112		13.1103	888.237		6.11168	815.629		14.1104	926.122		7.1114	776.191		15.111	798.499		8.11054	811.579		16.1111	833.455
1.11181	1070.14		9.11397	710.583		2.11123	932.325		10.1122	820.506		3.11134	894.947		11.1115	842.84		4.11249	803.763		12.1119	811.845		5.11303	739.061		13.1119	799.492		6.11349	725.566		14.1122	818.4		7.11265	728.402		15.112	735.354		8.11213	765.252		16.1126	797.115
1.11369	1015.66		9.11509	676.239		2.11227	853.031		10.1134	745.906		3.11259	765.902		11.1131	782.979		4.11339	752.461		12.1137	717.132		5.11393	656.722		13.1136	713.595		6.11481	662.183		14.1134	730.201		7.11446	664.16		15.1136	680.906		8.1131	647.489		16.1144	691.299
1.11514	854.158		9.11606	609.283		2.11331	793.706		10.1151	657.474		3.11356	698.958		11.1148	706.429		4.11457	723.497		12.1148	626.678		5.11532	601.376		13.1147	635.903		6.11564	598.26		14.1143	643.198		7.11598	588.344		15.1153	615.945		8.11422	590.852		16.1156	630.129
1.11591	714.281		9.11765	536.186		2.11498	704.356		10.1167	606.324		3.11495	685.934		11.1158	607.881		4.11638	631.671		12.1157	564.16		5.11712	550.051		13.1157	578.845		6.11703	554.912		14.1158	591.594		7.11682	526.794		15.1164	552.601		8.11595	569.048		16.1165	566.459
1.11702	685.618		9.11939	483.673		2.11664	604.299		10.1177	521.972		3.11676	621.617		11.1168	546.925		4.1179	560.736		12.1173	524.245		5.11851	494.326		13.1173	532.944		6.1189	476.456		14.1176	536.237		7.11786	513.046		15.1173	496.715		8.11755	516.878		16.118	531.226
1.11875	651.077		9.12043	444.837		2.11775	562.532		10.1188	480.422		3.11808	542.309		11.1185	506.091		4.11874	515.602		12.1191	485.99		5.11928	449.895		13.1191	468.493		6.12022	445.306		14.1188	489.095		7.11953	454.363		15.1189	482.746		8.11859	464.404		16.1198	490.07
1.12021	567.909		9.12134	409.175		2.11873	519.121		10.1205	435.031		3.11898	473.372		11.1202	460.301		4.11978	452.624		12.1203	408.152		5.12046	424.549		13.1201	428.103		6.12099	379.003		14.1196	452.893		7.12106	399.727		15.1207	423.615		8.11963	426.099		16.1209	392.122
1.12119	511.137		9.12279	396.157		2.12032	473.017		10.1221	391.403		3.12037	429.953		11.1213	425.079		4.12138	416.186		12.121	375.471		5.12219	410.156		13.121	393.276		6.12224	349.904		14.1209	429.806		7.1221	364.338		15.1219	380.983		8.12137	388.122		16.1218	359.367
1.1223	464.598		9.12446	356.683		2.12213	429.738		10.123	368.227		3.12217	404.788		11.1222	377.863		4.1229	383.992		12.1224	351.601		5.12365	355.147		13.1225	376.632		6.1239	333.728		14.1226	362.206		7.12314	349.689		15.1227	343.751		8.12304	352.952		16.1232	365.809
1.12396	449.081		9.12564	327.28		2.12317	372.057		10.124	347.426		3.12356	356.665		11.1238	322.762		4.12394	364.765		12.1241	338.166		5.12462	298.009		13.1242	350.468		6.12536	294.042		14.124	330.06		7.12473	309.529		15.1241	341.058		8.12394	312.518		16.1249	312.201
1.12563	406.094		9.12661	278.937		2.124	338.401		10.1256	324.727		3.12433	326.517		11.1256	318.166		4.12499	314.68		12.1255	307.17		5.12573	309.112		13.1253	306.499		6.12633	274.922		14.1249	289.419		7.12647	297.305		15.1258	301.757		8.12491	296.186		16.1262	282.873
1.12674	343.829		9.128	281.26		2.12546	317.617		10.1272	302.804		3.12551	325.905		11.1267	293.419		4.12658	301.218		12.1264	278.146		5.1274	267.574		13.1262	272.698		6.12745	276.327		14.1262	262.644		7.12765	259.059		15.127	260.482		8.12644	278.993		16.1271	260.387
1.12771	315.947		9.12981	264.222		2.12713	311.694		10.1283	272.853		3.12724	300.767		11.1275	246.143		4.12832	286.067		12.1277	260.473		5.12907	257.121		13.1277	278.621		6.12918	264.407		14.1279	256.981		7.12862	245.547		15.128	246.289		8.12804	255.427		16.1284	248.75
1.12931	310.448		9.1312	235.043		2.12831	283.717		10.1294	245.639		3.1287	261.672		11.129	228.013		4.1295	271.731		12.1294	235.222		5.13011	229.597		13.1294	248.284		6.13078	234.461		14.1295	240.077		7.13008	239.597		15.1293	219.514		8.12922	242.752		16.1302	234.354
1.13105	282.217		9.1321	237.294		2.12928	252.886		10.1309	226.582		3.1296	236.641		11.1306	229.552		4.13047	245.469		12.1309	213.346		5.13108	220.722		13.1308	210.701		6.13182	208.572		14.1305	231.917		7.13182	206.18		15.1311	220.817		8.13019	226.725		16.1316	208.557
1.13223	272.185		9.13335	225.583		2.13074	231.986		10.1326	203.833		3.13078	232.752		11.1319	216.937		4.13193	240.104		12.1319	207.248		5.13275	206.755		13.1317	200.114		6.13286	202.401		14.1315	210.543		7.13307	194.376		15.1326	210.71		8.13165	213.904		16.1325	203.377
1.1332	257.109		9.13522	206.487		2.13248	217.08		10.1339	185.22		3.13245	216.415		11.1328	192.085		4.13374	209.49		12.133	190.168		5.13448	179.053		13.133	186.699		6.13453	209.699		14.1333	176.312		7.13397	179.759		15.1335	176.899		8.13338	199.431		16.1337	191.716
1.13473	250.852		9.13668	198.151		2.13387	217.498		10.1348	175.668		3.13412	204.262		11.1342	188.522		4.13499	189.097		12.1348	180.606		5.1356	183.744		13.1348	172.244		6.1362	172.972		14.1349	178.17		7.13543	167.875		15.1346	176.07		8.1347	203.761		16.1355	176.142
1.13653	239.788		9.13759	197.621		2.13477	194.85		10.1362	159.888		3.13516	193.544		11.136	181.355		4.13589	166.521		12.1364	168.2		5.1365	178.552		13.1362	169.76		6.13731	148.409		14.1359	167.469		7.13724	161.496		15.1364	179.512		8.1356	172.438		16.1371	156.948
1.13771	220.71		9.13884	184.296		2.13609	182.763		10.138	156.029		3.13613	181.734		11.1374	165.304		4.13735	180.356		12.1373	156.259		5.1381	161.523		13.1372	153.828		6.13828	146.93		14.1369	164.875		7.13849	144.592		15.138	155.737		8.13692	165.349		16.138	142.826
1.13848	192.762		9.14064	181.525		2.13782	160.443		10.1394	146.885		3.13773	179.607		11.1384	148.69		4.13915	175.656		12.1384	153.154		5.1399	157.488		13.1385	143.688		6.13988	142.367		14.1387	164.982		7.13932	125.985		15.1389	149.558		8.13873	152.239		16.1391	135.016
1.13987	190.74		9.1421	164.606		2.13928	139.331		10.1402	137.178		3.13946	159.602		11.1396	132.997		4.1404	180.332		12.1402	155.176		5.14094	144.732		13.1403	133.701		6.14161	134.807		14.1403	137.762		7.14057	135.702		15.1401	129.752		8.14019	148.532		16.1409	143.828
1.1416	189.085		9.14293	168.346		2.14025	149.092		10.1416	134.375		3.14064	154.52		11.1413	130.927		4.14117	166.962		12.1418	134.315		5.14171	128.553		13.1417	132.502		6.14272	121.664		14.1413	130.33		7.1423	131.55		15.1418	128.839		8.14109	145.454		16.1425	134.741
1.14292	164.845		9.14398	153.664		2.14144	143.575		10.1434	133.963		3.14155	161.898		11.1429	117.927		4.14242	154.079		12.1428	128.323		5.14317	126.65		13.1426	128.389		6.14349	116.048		14.1422	119.6		7.14362	109.424		15.1434	140.825		8.14234	124.795		16.1434	130.095
1.14389	165.465		9.14564	146.161		2.14324	127.121		10.1448	129.394		3.14315	155.457		11.1439	115.78		4.14415	142.591		12.1437	128.329		5.1449	126.078		13.1436	111.572		6.14495	116.788		14.1437	121.058		7.1446	106.991		15.1443	122.893		8.14422	119.588		16.1443	104.501
1.14521	165.945		9.14717	147.327		2.14477	122.603		10.1455	133.495		3.14495	148.779		11.145	109.535		4.14554	138.323		12.1453	112.604		5.14608	107.683		13.1453	108.914		6.14668	104.176		14.1453	121.023		7.14585	102.508		15.1453	115.15		8.14567	114.116		16.1459	102.827
1.14695	174.039		9.14821	149.578		2.1456	120.504		10.1468	107.996		3.14606	138.028		11.1468	99.1026		4.14651	141.589		12.1469	112.335		5.14705	96.5944		13.1468	103.469		6.14786	107.838		14.1465	111.59		7.14758	114.766		15.1469	123.027		8.14644	115.458		16.1475	121.437
1.14848	168.281		9.14925	168.427		2.14664	128.094		10.1484	107.525		3.14683	133.384		11.1484	101.059		4.14769	131.41		12.148	94.8229		5.14844	108.75		13.1478	103.991		6.14883	104.927		14.1475	111.542		7.14911	103.403		15.1485	105.064		8.14755	119.305		16.1487	114.423
1.14945	147.282		9.15085	153.575		2.14831	109.66		10.1499	103.108		3.14828	117.268		11.1493	99.1085		4.14943	119.15		12.149	102.786		5.15018	111.178		13.1489	95.0436		6.15022	99.6066		14.149	102.449		7.15008	112.991		15.1495	85.8969		8.14922	108.747		16.1496	114.125
1.15063	145.722		9.15259	148.549		2.14984	118.983		10.1509	100.683		3.15002	119.132		11.1503	87.2449		4.15103	113.88		12.1505	113.352		5.15164	106.039		13.1505	88.8285		6.15196	101.611		14.1507	99.6245		7.15119	114.763		15.1505	89.0164		8.15067	101.301		16.1511	99.5171
1.1523	135.439		9.15377	135.171		2.15088	115.81		10.1521	93.8179		3.1512	120.453		11.1519	100.409		4.152	114.145		12.1523	100.877		5.15261	109.365		13.1522	85.4674		6.15335	96.7764		14.1521	87.5163		7.15286	104.017		15.1521	96.3887		8.15172	94.1758		16.153	91.2412
1.15389	118.067		9.15474	130.244		2.15192	91.6975		10.1537	104.629		3.15217	108.118		11.1535	96.1322		4.15304	121.571		12.1535	102.47		5.15379	95.0049		13.1533	88.4288		6.15432	88.5392		14.153	90.3942		7.15453	101.569		15.1538	101.876		8.1529	103.752		16.1542	91.6319
1.15494	120.05		9.15627	127.432		2.15359	94.9363		10.1554	92.6697		3.15356	106.272		11.1546	73.55		4.15478	113.343		12.1545	102.786		5.15553	92.1508		13.1543	87.7399		6.1555	86.9854		14.1543	85.7567		7.15557	98.1154		15.1551	92.1001		8.15449	99.5857		16.1551	95.3419
1.15598	118.616		9.158	135.901		2.15532	107.748		10.1564	83.8599		3.1553	88.9865		11.1556	80.4452		4.15645	95.1838		12.1559	97.0448		5.15705	92.0643		13.1558	80.9253		6.15724	89.4876		14.156	78.6379		7.15661	83.3917		15.156	94.7901		8.15616	85.2497		16.1565	110.337
1.15771	134.249		9.15932	145.111		2.15644	96.8032		10.1574	89.1625		3.15676	86.887		11.1571	87.3642		4.15749	98.2765		12.1576	87.2747		5.15803	97.3818		13.1576	69.8818		6.15877	83.4812		14.1575	90.421		7.15828	79.4461		15.1573	103.305		8.15727	91.0443		16.1583	97.9335
1.15938	136.793		9.16022	128.177		2.15741	92.5325		10.1591	91.7392		3.15773	113.647		11.159	82.3658		4.15853	99.3471		12.159	78.283		5.15921	87.6177		13.1589	67.7107		6.15974	71.2984		14.1584	83.9405		7.16001	71.0986		15.1591	100.898		8.15824	84.525		16.1596	95.1271
1.16028	132.418		9.16161	121.828		2.15887	92.5892		10.1608	86.7409		3.15891	98.0498		11.1602	85.3302		4.1602	97.3549		12.1599	71.868		5.16094	85.6941		13.1598	75.0919		6.16092	73.8155		14.1596	90.084		7.16099	74.2956		15.1605	96.3887		8.15977	78.3277		16.1605	85.4853
1.16119	136.224		9.16342	126.433		2.16067	87.5341		10.1619	84.9753		3.16064	100.036		11.1611	84.2178		4.16193	95.2136		12.1612	73.1295		5.16254	89.6486		13.1613	73.893		6.16265	72.4227		14.1615	82.4344		7.16182	82.5954		15.1614	90.931		8.16158	73.8572		16.1618	81.4592
1.16278	139.453		9.16467	136.313		2.16192	83.3738		10.1629	89.082		3.16224	108.92		11.1625	74.1793		4.1629	91.6975		12.163	66.5088		5.16337	75.4856		13.1631	79.121		6.16425	83.1472		14.163	84.4415		7.16335	84.7248		15.1628	84.525		8.16276	81.5934		16.1637	79.6936
1.16445	144.276		9.16543	127.223		2.16276	74.7668		10.1645	97.7277		3.16321	99.5827		11.1643	78.7631		4.16374	95.8847		12.1645	71.9605		5.16435	74.2956		13.1643	81.2295		6.16515	77.4092		14.1637	69.7237		7.16508	77.4211		15.1646	87.0868		8.16373	81.5874		16.165	78.62
1.16556	145.278		9.16675	126.731		2.16428	79.9919		10.1662	94.304		3.16433	85.2467		11.1656	79.4163		4.16526	112.967		12.1653	73.4665		5.16601	87.2628		13.1651	63.8784		6.16613	72.214		14.1649	72.8581		7.16619	85.2139		15.166	98.861		8.16526	73.3771		16.1659	73.9735
1.16653	128.807		9.16849	120.71		2.16616	74.066		10.1673	81.5337		3.16613	85.9565		11.1665	80.3587		4.16693	102.839		12.1664	70.8481		5.16761	90.931		13.1664	66.3		6.16779	71.0151		14.1666	79.7533		7.16717	77.3048		15.1667	89.5442		8.16706	72.2169		16.1671	77.0573
1.16806	116.203		9.16981	127.918		2.16734	78.9033		10.1682	82.2137		3.16773	91.3634		11.1679	85.2855		4.16811	93.2602		12.1682	76.4936		5.16865	85.1513		13.1681	70.526		6.16932	68.1043		14.1681	81.5367		7.16862	78.2025		15.1679	99.0847		8.16817	71.8292		16.1687	71.0598
1.1698	127.527		9.17078	135.812		2.16817	78.6737		10.1696	82.0407		3.16856	87.5759		11.1698	79.3059		4.16908	95.318		12.1696	77.776		5.16969	70.0518		13.1695	62.077		6.17043	74.1256		14.169	84.0269		7.17043	68.2833		15.1696	104.766		8.16901	82.0377		16.1702	77.6835
1.17112	120.799		9.17196	119.153		2.16949	74.9816		10.1713	71.6891		3.16953	87.5819		11.171	71.2417		4.17054	92.622		12.1707	74.1793		5.17122	70.0995		13.1704	68.1431		6.17147	70.7616		14.1701	89.9021		7.17168	65.4322		15.1711	80.0306		8.1704	80.6122		16.1712	81.5516
1.17202	115.601		9.17377	125.779		2.17123	76.8664		10.1725	77.5583		3.1712	85.8432		11.1718	76.926		4.17228	108.378		12.1718	69.2167		5.17296	78.8407		13.1717	81.6292		6.173	68.5397		14.1718	72.1722		7.17258	68.4861		15.1721	72.4764		8.17206	83.8331		16.1723	70.3888
1.17341	139.781		9.17536	128.359		2.17255	83.2068		10.1734	85.9893		3.17273	91.3008		11.173	82.9056		4.1736	112.18		12.1734	73.2727		5.17421	81.5069		13.1734	80.648		6.17474	66.0942		14.1735	67.5496		7.17397	74.409		15.1732	88.7808		8.17338	84.7904		16.174	72.1334
1.17514	124.109		9.17634	123.617		2.17352	82.3926		10.1748	68.0477		3.17384	97.346		11.1748	78.5335		4.17457	93.2542		12.175	71.7129		5.17511	78.7781		13.175	84.4922		6.17599	74.2121		14.1746	65.4918		7.17578	80.4153		15.1749	92.8158		8.17429	82.6998		16.1757	74.7728
1.17653	110.441		9.17738	119.603		2.17477	76.2938		10.1766	67.7226		3.17488	86.9198		11.1762	63.6487		4.17589	98.2437		12.1762	69.0467		5.17657	74.1107		13.176	73.6395		6.17689	81.2951		14.1756	76.7352		7.17717	80.642		15.1766	85.9744		8.1756	76.6874		16.1767	69.9593
1.17744	132.752		9.17911	126.925		2.1765	68.7545		10.178	62.0741		3.17641	86.5023		11.1771	66.3328		4.17763	91.0056		12.1772	76.5771		5.17837	87.4328		13.1771	59.4377		6.17835	71.9157		14.1771	72.551		7.17807	72.2617		15.1776	82.8907		8.17734	81.7902		16.1777	76.4429
1.17875	131.592		9.18078	138.684		2.1781	77.433		10.1789	70.9823		3.17814	93.8835		11.1783	66.0077		4.17908	88.1366		12.1787	76.0194		5.17969	78.9421		13.1787	71.1731		6.18015	76.9976		14.1789	73.7797		7.17939	72.0619		15.1786	82.6014		8.1788	74.9517		16.1793	71.2328
1.18063	120.176		9.18182	127.53		2.17907	74.9875		10.1802	69.8967		3.17933	80.5436		11.1801	66.1449		4.17999	90.2958		12.1805	79.7592		5.1806	73.72		13.1804	76.6755		6.1814	91.6289		14.1801	69.7088		7.18119	69.1243		15.1803	80.1141		8.17977	68.0208		16.1811	67.5347
1.18195	125.544		9.18286	134.461		2.18019	76.3087		10.182	73.0669		3.18023	75.5929		11.1817	57.6781		4.18124	87.0093		12.1817	75.6735		5.18198	81.2116		13.1814	71.0568		6.18231	73.4546		14.181	60.2608		7.18265	64.9848		15.182	79.6489		8.18095	68.3101		16.1822	69.8579
1.18278	132.111		9.18453	126.009		2.18185	76.5383		10.1835	76.2133		3.18169	85.0022		11.1827	64.0603		4.18304	104.056		12.1826	71.4565		5.18379	73.9676		13.1825	62.4618		6.18377	65.3278		14.1825	64.105		7.18342	69.3539		15.1831	73.6097		8.18269	74.2062		16.1832	65.125
1.18389	123.274		9.1862	117.432		2.18352	88.4676		10.1844	73.7528		3.18349	86.8124		11.1837	89.9379		4.18457	115.21		12.1842	89.2728		5.18511	72.2289		13.1842	55.1282		6.18557	61.069		14.1844	80.0068		7.18453	70.8898		15.1841	84.7129		8.18429	87.3105		16.1848	66.9502
1.18563	125.553		9.18717	136.23		2.18456	79.4193		10.1856	80.1201		3.18481	82.84		11.1854	83.6303		4.1854	100.949		12.186	81.4055		5.18587	71.8173		13.1859	62.0502		6.18682	68.7932		14.1855	77.1974		7.18626	69.0855		15.1857	81.9005		8.18526	80.6599		16.1865	74.1853
1.18709	129.254		9.18807	138.445		2.1856	81.0983		10.1874	82.3628		3.18571	83.1889		11.1871	74.737		4.18644	90.764		12.1871	68.832		5.18712	69.6879		13.1868	67.654		6.18765	76.8604		14.1863	69.6492		7.18772	74.9189		15.1874	80.4124		8.18637	72.7955		16.1876	70.4395
1.18813	127.116		9.1896	119.209		2.18727	85.8312		10.189	78.0026		3.1871	90.0572		11.1882	67.4184		4.18811	97.179		12.188	76.8455		5.18879	76.9588		13.1877	65.1101		6.1889	69.5776		14.1877	68.5338		7.18876	75.2291		15.1885	82.2375		8.18811	69.7386		16.1884	63.3863
1.18924	122.242		9.19127	141.404		2.189	81.826		10.1898	75.8971		3.18898	77.7909		11.1892	67.7852		4.18964	92.7085		12.1894	74.5282		5.19025	80.4511		13.1892	61.7848		6.19064	70.3828		14.1894	70.0548		7.18987	68.3459		15.1892	83.6929		8.18977	74.0749		16.1898	72.202
1.19098	118.163		9.19245	137.079		2.18998	79.8726		10.1908	80.4064		3.1903	76.258		11.1908	71.6443		4.19061	90.0423		12.1911	71.8143		5.19122	75.2142		13.1909	67.7792		6.19203	68.3399		14.1907	65.6081		7.19147	71.2179		15.1907	86.7498		8.19067	76.6218		16.1916	77.5762
1.19264	118.52		9.19342	130.632		2.19088	72.0082		10.1925	81.483		3.19106	73.887		11.1926	78.793		4.19172	95.5208		12.1923	80.4153		5.1924	73.0132		13.1921	75.2649		6.193	70.2247		14.1916	56.7685		7.19314	74.9279		15.1924	84.6771		8.19158	80.4452		16.1928	69.5
1.19369	111.42		9.19481	138.77		2.19241	63.0523		10.194	70.2456		3.19231	79.4491		11.1936	64.0484		4.19332	105.037		12.1933	75.1068		5.19407	68.1401		13.193	73.6634		6.19418	74.8563		14.1929	57.1324		7.19425	75.6168		15.1937	79.8964		8.19317	83.1233		16.1938	69.6432
1.19473	121.276		9.19661	130.688		2.19407	69.8669		10.1951	70.6035		3.19405	92.3118		11.1944	63.3207		4.19506	94.2056		12.1946	74.1763		5.19567	74.8623		13.1945	63.5593		6.19592	68.5875		14.1946	76.1178		7.19522	66.7921		15.1946	88.3692		8.19484	94.3607		16.1951	73.2011
1.19625	124.974		9.19793	135.323		2.19526	73.1802		10.1962	81.149		3.19544	91.4082		11.1959	74.8414		4.19617	93.1439		12.1964	66.6191		5.19671	72.372		13.1963	62.8137		6.19752	72.706		14.1962	70.9345		7.19675	70.5737		15.196	83.5647		8.19595	81.6828		16.1969	59.5152
1.19799	113.182		9.19884	123.886		2.19623	74.8831		10.1977	75.3931		3.19641	90.0065		11.1976	90.8117		4.19714	108.631		12.1979	71.0598		5.19782	72.1096		13.1976	64.6031		6.19849	65.8497		14.1971	52.0743		7.19855	73.5202		15.1978	76.8694		8.19693	89.2758		16.1983	69.9504
1.19917	114.998		9.20016	108.777		2.19769	72.0291		10.1994	67.654		3.19759	96.326		11.1987	85.8193		4.19867	98.0051		12.1988	78.45		5.19942	59.2558		13.1985	62.2381		6.1996	66.1897		14.1983	73.7648		7.19974	69.1839		15.1991	82.8758		8.19838	82.506		16.1993	70.9166
1.20014	108.953		9.20196	108.885		2.19942	67.2812		10.2007	70.9107		3.19926	90.4419		11.1997	79.9919		4.20047	90.5851		12.2	74.4596		5.20115	71.8024		13.1998	66.4074		6.20127	66.2553		14.2	80.6748		7.20064	71.4773		15.2001	93.4034		8.20019	68.9424		16.2005	78.6767
1.20174	118.866		9.20342	128.073		2.20074	71.707		10.2016	80.7673		3.20085	88.2231		11.2012	74.227		4.20165	87.0063		12.2017	79.3447		5.20219	79.6489		13.2017	76.8127		6.20293	72.7239		14.2016	79.4163		7.20217	63.598		15.2013	72.4525		8.20151	65.8676		16.2022	67.9075
1.20348	127.897		9.20432	115.651		2.20171	71.0508		10.203	90.9221		3.20189	95.8578		11.203	64.7671		4.20256	89.416		12.2033	82.9384		5.20317	76.2789		13.203	71.6622		6.20397	61.5104		14.2026	75.7748		7.20397	66.6847		15.2031	68.7306		8.20234	73.7528		16.2037	77.8655
1.20459	124.974		9.20557	120.417		2.20303	71.7577		10.2048	74.5581		3.20294	96.7078		11.2044	65.459		4.20408	106.699		12.2043	76.2103		5.20483	71.54		13.204	77.0751		6.20495	61.0541		14.2037	75.6466		7.20515	73.5769		15.2046	75.5363		8.20373	81.8767		16.2047	81.319
1.20542	127.53		9.20738	125.854		2.20484	83.4364		10.2062	71.4594		3.2046	87.9845		11.2053	71.865		4.20596	88.3274		12.2054	65.4232		5.20657	67.3051		13.2053	73.4814		6.20661	70.2337		14.2054	82.0288		7.20592	73.9258		15.2055	83.5706		8.20561	81.2325		16.2059	83.7884
1.20681	119.803		9.20884	124.288		2.20623	81.9274		10.2071	77.7999		3.20627	78.107		11.2065	76.3176		4.20714	89.3772		12.2071	70.517		5.20761	88.7688		13.2071	62.3335		6.20835	74.7251		14.2071	69.163		7.2073	69.4583		15.2067	86.0967		8.20692	73.0192		16.2076	73.5739
1.20855	107.593		9.20967	117.778		2.20713	82.7416		10.2084	84.4266		3.20738	84.7278		11.2083	69.6134		4.2079	92.6339		12.2088	74.8384		5.20844	87.9517		13.2085	75.6735		6.20932	75.2559		14.208	68.7097		7.20897	67.0873		15.2085	84.4743		8.20783	85.527		16.2092	73.1325
1.2098	108.7		9.21078	121.142		2.20838	78.7989		10.2103	82.2495		3.20835	92.3953		11.2099	74.9905		4.20922	82.8817		12.2096	74.8474		5.2099	74.573		13.2093	70.2039		6.21015	76.8515		14.2089	70.8451		7.21029	68.829		15.2101	86.2637		8.20915	84.1343		16.21	73.6276
1.21077	115.386		9.21245	116.668		2.21025	65.799		10.2116	72.6285		3.21002	80.3497		11.2108	72.9238		4.21096	87.6713		12.2106	79.8636		5.21157	63.4012		13.2104	66.1509		6.21168	72.4018		14.2105	80.9939		7.21126	74.6833		15.2109	93.9879		8.21102	72.2318		16.2111	69.4493
1.21209	109.866		9.21397	125.842		2.21171	74.6923		10.2123	81.149		3.21176	91.3456		11.2119	66.1628		4.21228	87.8443		12.2123	70.9226		5.21275	76.8485		13.2121	62.0234		6.21335	78.8705		14.2121	79.5147		7.21258	67.2484		15.2119	82.1839		8.21241	68.2683		16.2127	66.5267
1.21389	111.038		9.21495	113.582		2.21255	77.4151		10.2136	89.747		3.2128	83.5349		11.2137	73.9258		4.21318	83.7108		12.2139	70.4693		5.21372	83.8301		13.2137	61.9995		6.21453	76.5353		14.2133	71.2029		7.21432	63.6129		15.2136	77.4181		8.21317	76.8604		16.2143	72.8015
1.21535	114.512		9.21606	122.105		2.21366	76.2252		10.2153	80.9283		3.21363	92.2492		11.2153	69.9921		4.21443	85.697		12.2149	82.1183		5.21518	86.887		13.2146	67.6301		6.2155	66.4461		14.2142	73.8035		7.21578	76.8097		15.2151	83.5975		8.21436	75.757		16.2153	78.0533
1.21632	107.823		9.21772	131.774		2.21532	67.1291		10.2166	78.957		3.21516	86.2219		11.2161	77.9698		4.21617	84.4206		12.2159	78.1339		5.21692	78.3009		13.2158	69.67		6.21696	64.0543		14.2157	75.3633		7.21675	81.82		15.2162	94.5963		8.21602	85.5688		16.2164	62.3514
1.2175	121.276		9.21939	132.257		2.21678	67.994		10.2176	79.8129		3.21683	93.3139		11.2171	69.4046		4.21776	89.3623		12.2174	66.2284		5.2183	72.208		13.2173	71.2984		6.2187	69.9891		14.2175	67.1291		7.21793	82.4135		15.2172	104.611		8.21748	85.5688		16.2179	70.0905
1.21924	123.385		9.2205	153.664		2.21782	76.8634		10.2189	81.8498		3.21801	82.8042		11.2188	76.1119		4.21874	100.301		12.2192	67.7494		5.21928	76.2401		13.2191	71.8382		6.22008	72.8731		14.2187	71.6622		7.21967	76.8187		15.2187	89.2878		8.21845	81.146		16.2197	76.1834
1.22077	108.396		9.22147	154.839		2.21894	68.0208		10.2206	83.5677		3.21898	80.8657		11.2204	74.8861		4.21985	99.0996		12.2205	73.6067		5.22053	68.6769		13.2202	71.0598		6.22106	77.2332		14.2197	63.8873		7.22126	86.7707		15.2205	84.7188		8.21956	72.4317		16.2209	63.1566
1.22174	122.311		9.223	141.422		2.22053	75.6496		10.2222	90.1288		3.22037	92.4341		11.2215	70.3232		4.22151	100.093		12.2214	67.2901		5.22226	69.2346		13.2211	71.2775		6.22231	64.7403		14.221	64.1647		7.22224	78.62		15.2217	83.8659		8.2213	72.8104		16.2218	66.3388
1.22292	106.848		9.22481	135.389		2.22227	81.4592		10.2232	82.2882		3.22217	86.1384		11.2225	73.4695		4.22318	109.117		12.2228	66.0883		5.22379	80.302		13.2227	70.2963		6.22404	61.0094		14.2228	75.1903		7.22328	85.9058		15.2226	79.9262		8.2229	85.4107		16.2232	70.5111
1.22466	113.412		9.22599	133.188		2.22338	94.8975		10.2243	81.659		3.22356	92.2969		11.2241	66.9084		4.22422	100.46		12.2246	67.3379		5.22469	85.4793		13.2244	76.6039		6.2255	72.5629		14.2242	73.5649		7.22501	72.2676		15.2241	78.104		8.22394	77.5046		16.225	66.5147
1.22625	128.52		9.22696	134.491		2.22428	91.0175		10.2259	87.4506		3.22446	92.8516		11.2258	60.4487		4.22526	97.9604		12.2259	85.8163		5.22587	81.0804		13.2256	60.1326		6.22647	64.2034		14.2251	70.517		7.22668	68.6024		15.2259	86.3889		8.22498	76.2789		16.2264	67.4124
1.22716	123.528		9.22842	147.95		2.22581	86.0579		10.2277	82.6551		3.22571	91.3157		11.227	60.9974		4.22693	104.635		12.2268	81.6321		5.22768	81.7306		13.2266	68.9036		6.22772	62.8226		14.2265	66.6221		7.22765	68.3399		15.2272	86.7558		8.22665	78.7959		16.2273	72.9595
1.22813	119.12		9.23022	142.826		2.22762	87.8264		10.2287	85.0737		3.22752	92.4192		11.228	71.1701		4.22867	100.412		12.2282	78.9033		5.22921	80.7374		13.2281	76.8873		6.22953	62.6795		14.2283	63.0374		7.22855	69.2436		15.228	93.967		8.22838	69.0497		16.2287	86.2846
1.22973	105.619		9.23141	140.33		2.2288	82.1391		10.2297	80.3259		3.22898	76.2461		11.2294	70.0846		4.22957	80.8925		12.23	73.1743		5.23004	86.544		13.2299	65.5127		6.23099	53.6818		14.2296	64.1766		7.23015	65.5634		15.2295	93.6181		8.22949	71.4624		16.2305	74.7579
1.23132	94.5337		9.23217	145.078		2.2297	67.5735		10.2314	75.4736		3.22988	80.8508		11.2312	64.3168		4.23047	91.1457		12.2314	71.0181		5.23108	90.8177		13.231	65.9541		6.23182	57.5946		14.2305	64.8804		7.23175	70.0846		15.2313	90.1318		8.2304	74.3165		16.2318	70.4842
1.23237	124.548		9.23356	133.793		2.23123	71.1403		10.2331	79.2761		3.23113	92.8218		11.2325	61.7609		4.232	104.781		12.2321	74.743		5.23275	76.7859		13.2319	66.4253		6.23293	75.7808		14.2316	65.8825		7.23286	78.5991		15.2326	84.0359		8.23199	65.7125		16.2325	73.559
1.23341	111.232		9.23522	126.764		2.2331	73.5739		10.2341	73.1146		3.23294	91.2531		11.2334	59.4824		4.23367	100.967		12.2334	75.4975		5.23428	63.1119		13.2333	70.0816		6.23453	75.6973		14.2333	67.1052		7.23383	85.4167		15.2334	78.2025		8.2338	76.5234		16.2338	69.3778
1.23494	109.791		9.23654	127.942		2.23421	81.653		10.235	75.3305		3.23446	99.7706		11.2349	65.8467		4.23478	97.006		12.235	81.0088		5.23525	65.4381		13.235	75.7778		6.23606	65.7364		14.2348	81.1639		7.23536	80.3497		15.2346	72.542		8.23491	83.1919		16.2355	76.762
1.23674	103.442		9.23745	139.683		2.23498	74.1405		10.2365	78.7005		3.2353	100.37		11.2367	74.0063		4.23575	94.1161		12.2365	69.8907		5.23629	74.6714		13.2362	67.1828		6.2371	55.2744		14.2358	74.3761		7.2371	63.5145		15.2364	80.5436		8.23567	77.5404		16.2369	73.9974
1.23799	109.126		9.23877	128.106		2.23637	72.5241		10.2381	77.9132		3.23634	83.2515		11.2379	74.1018		4.23728	79.5445		12.2375	64.8417		5.23796	73.5053		13.2372	69.2436		6.23814	60.8394		14.2369	66.8935		7.23842	78.3247		15.2378	84.9306		8.23713	84.9634		16.2379	71.874
1.23889	128.022		9.24057	115.237		2.2381	79.2672		10.2393	74.5402		3.23801	91.0235		11.2387	70.2665		4.23901	88.7181		12.2386	71.2179		5.23969	66.1956		13.2385	72.205		6.23974	70.35		14.2385	72.7567		7.23932	81.6739		15.2387	78.3486		8.23887	87.0003		16.2391	69.4643
1.24028	122.392		9.24203	116.788		2.23942	66.5833		10.2403	80.7673		3.23953	99.8541		11.24	61.2539		4.24026	92.4878		12.2403	76.8097		5.2408	77.0781		13.2403	66.6161		6.24147	73.5441		14.2402	71.3521		7.24071	68.498		15.2399	77.1944		8.24005	73.1087		16.2407	64.3675
1.24209	112.007		9.243	117.345		2.24039	71.2984		10.2417	74.9935		3.24058	94.7573		11.2417	71.0777		4.24124	93.1886		12.242	75.915		5.24178	79.2373		13.2418	70.0369		6.24265	71.7189		14.2413	60.055		7.24244	67.6808		15.2416	69.7595		8.24102	77.3137		16.2424	68.2475
1.24341	116.263		9.24411	122.171		2.24164	71.2238		10.2435	84.1104		3.24162	92.5295		11.243	80.6181		4.24256	90.2451		12.243	71.1165		5.2433	72.709		13.2427	77.5165		6.24356	74.4447		14.2423	63.264		7.24383	60.8483		15.2432	81.2206		8.24241	76.6457		16.2434	75.3424
1.24431	123.346		9.24585	140.959		2.24338	70.1055		10.2449	85.7358		3.24321	83.4126		11.244	78.8437		4.24436	85.3899		12.244	68.2176		5.24504	67.0247		13.2439	79.3894		6.24509	71.0121		14.2439	64.3496		7.24474	56.9325		15.2442	83.0666		8.24415	64.0722		16.2444	72.372
1.2457	111.918		9.24745	123.644		2.24491	74.1316		10.2458	80.9909		3.24495	83.8808		11.2452	65.5186		4.24582	86.89		12.2457	71.9306		5.24629	78.2949		13.2456	88.3931		6.24689	65.5276		14.2456	76.7322		7.24606	70.359		15.2453	79.1031		8.24561	74.5282		16.2461	63.8992
1.24757	105.121		9.24849	127.646		2.24588	70.353		10.2471	93.4511		3.24613	73.2309		11.2469	70.007		4.24672	91.271		12.2474	65.9063		5.24719	74.9756		13.2472	74.1256		6.24807	68.9274		14.2468	71.2358		7.24786	80.6927		15.247	81.9602		8.24651	80.2513		16.2477	65.2622
1.24889	116.412		9.24953	119.863		2.24706	82.6431		10.2489	81.823		3.2471	74.3344		11.2485	62.587		4.24797	92.0076		12.2485	61.9637		5.24865	66.9531		13.2482	68.9066		6.24897	73.9944		14.2477	67.988		7.24925	72.1871		15.2487	69.5329		8.24769	80.0426		16.2489	76.5115
1.24966	113.114		9.25127	137.664		2.2488	88.3125		10.2503	69.0527		3.24856	72.8134		11.2495	67.8717		4.24985	84.1432		12.2495	62.1128		5.25046	71.0658		13.2492	65.8795		6.25043	73.7558		14.2493	70.4753		7.25008	75.8852		15.2497	77.8953		8.24942	82.1809		16.2498	76.7202
1.25084	115.66		9.25293	132.788		2.25039	69.0497		10.2512	83.5796		3.25037	78.1786		11.2506	71.6294		4.25131	85.9923		12.2511	69.1451		5.25171	66.9203		13.251	62.4647		6.25231	71.5549		14.251	64.7134		7.25119	77.093		15.2507	84.6741		8.25102	74.4716		16.2515	66.3537
1.25257	117.712		9.25391	130.229		2.25137	65.969		10.2525	80.2036		3.25155	88.3245		11.2524	72.9655		4.25207	88.9597		12.2529	74.0928		5.25254	74.2867		13.2526	83.517		6.25349	63.5921		14.2521	64.5911		7.25293	65.9362		15.2523	77.0632		8.25199	67.1887		16.2532	62.0293
1.25403	120.384		9.25481	128.651		2.25248	92.786		10.2544	73.228		3.25245	89.0671		11.254	80.2961		4.25318	82.9951		12.254	68.4443		5.25379	78.8526		13.2535	87.4954		6.25425	67.5317		14.253	79.0226		7.25439	73.9586		15.2541	81.1699		8.25311	73.4844		16.2542	58.1553
1.255	124.569		9.2564	135.353		2.25421	94.6231		10.2558	89.0313		3.25398	87.7668		11.2551	65.8049		4.25485	91.4589		12.2548	79.1926		5.25553	81.7037		13.2544	63.8635		6.25557	74.0869		14.2544	67.8627		7.25536	72.548		15.2551	81.6113		8.25484	80.1618		16.255	61.1883
1.25612	118.863		9.258	138.252		2.25588	78.1547		10.2566	80.3945		3.25578	77.2034		11.256	66.7981		4.25631	100.158		12.2562	73.7827		5.25685	68.2564		13.256	72.0141		6.25731	76.3296		14.2561	73.9884		7.25647	72.8104		15.2559	78.5454		8.25644	84.8978		16.2565	64.2452
1.25785	121.005		9.25911	139.188		2.25678	76.1476		10.2577	70.8749		3.25703	88.3185		11.2577	68.3578		4.25735	105.073		12.258	66.7116		5.25782	69.4434		13.2577	72.1096		6.25863	79.3805		14.2574	68.6978		7.25814	65.2801		15.2574	74.6953		8.25734	75.4796		16.2582	68.2385
1.25945	115.082		9.26009	118.055		2.25769	74.7042		10.2594	78.4023		3.2578	89.0879		11.2594	58.3432		4.25846	93.132		12.2591	66.4283		5.25907	88.7987		13.2588	68.2027		6.25953	60.4785		14.2583	65.1667		7.2598	69.5388		15.2591	77.2929		8.25831	66.2195		16.2594	72.6792
1.26049	115.583		9.26161	110.82		2.25928	73.1922		10.2609	76.0015		3.25912	82.9056		11.2604	56.0915		4.26013	81.5576		12.2601	71.2119		5.2608	76.8425		13.2598	70.2307		6.26078	71.4505		14.2596	69.333		7.26085	68.9125		15.2603	76.8216		8.25991	70.4872		16.2603	79.5326
1.26153	121.899		9.26335	121.938		2.26095	78.7393		10.2619	71.9754		3.26085	76.2103		11.2613	73.049		4.26179	83.514		12.2616	69.7983		5.2624	68.3369		13.2613	73.6992		6.26252	69.0616		14.2614	68.0775		7.26189	74.6237		15.2612	84.4176		8.26151	74.0063		16.2618	74.4746
1.2632	125.264		9.26467	129.546		2.26206	80.144		10.263	70.9584		3.26217	81.4472		11.2628	71.2656		4.2629	75.1933		12.2633	71.7606		5.26337	69.2644		13.2631	68.2505		6.26411	63.9678		14.2629	62.7033		7.26349	79.1031		15.2627	87.8354		8.26262	71.9784		16.2635	72.1543
1.26494	110.209		9.26557	124.831		2.2631	76.0254		10.2646	69.9921		3.26314	82.0586		11.2645	73.2727		4.26388	90.6745		12.2647	70.854		5.26442	69.8728		13.2644	75.25		6.26508	73.2071		14.2638	68.9662		7.26522	67.5407		15.2644	88.9537		8.26366	76.5264		16.2649	73.2906
1.26605	107.17		9.26696	131.589		2.26456	64.2213		10.2663	75.921		3.26439	92.1031		11.2657	67.651		4.26547	98.8043		12.2657	67.1589		5.26615	76.079		13.2653	79.968		6.2662	73.0043		14.265	76.2848		7.26633	63.7024		15.2658	100.633		8.26519	77.9191		16.2658	68.2862
1.26702	113.904		9.26877	146.423		2.26637	70.6632		10.2675	67.3766		3.26613	96.1471		11.2667	64.5494		4.26721	94.641		12.2669	71.5459		5.26782	68.5546		13.2667	71.1403		6.26793	74.0958		14.2668	72.5808		7.26723	66.1748		15.2667	93.97		8.26686	62.089		16.2671	65.8199
1.26862	119.976		9.27015	134.586		2.26769	70.9882		10.2684	82.1123		3.26773	90.7491		11.2681	68.9095		4.26839	79.5147		12.2687	72.9715		5.26879	69.2495		13.2685	68.4294		6.26953	74.4656		14.2684	73.8632		7.26883	72.0887		15.268	76.419		8.26811	84.7188		16.2689	74.9368
1.27035	119.227		9.27106	151.302		2.26859	71.4087		10.2699	85.4495		3.2687	89.2102		11.2699	68.6292		4.26929	85.5121		12.2702	79.2672		5.26983	75.244		13.2698	67.481		6.27057	73.5143		14.2693	67.0247		7.27064	77.8088		15.2698	86.5798		8.26901	77.2392		16.2704	70.344
1.27139	102.971		9.27238	143.757		2.26998	79.6101		10.2717	69.7058		3.26974	91.265		11.2712	71.7487		4.27089	96.3439		12.2711	77.1616		5.27157	82.8638		13.2708	76.4369		6.27161	76.7143		14.2704	62.3514		7.27175	71.191		15.2712	91.5185		8.27047	76.255		16.2713	60.2519
1.27223	103.871		9.27418	121.726		2.27178	76.1029		10.273	69.2853		3.27148	84.4534		11.2721	62.927		4.27269	98.7596		12.2723	76.6517		5.27324	88.3901		13.2721	78.1398		6.27328	71.2686		14.2722	72.6315		7.27258	64.8267		15.2721	85.1274		8.27227	79.8905		16.2725	61.74
1.27369	107.877		9.27557	114.101		2.2731	71.3521		10.2739	78.0474		3.27314	88.396		11.2734	69.9623		4.27381	95.8876		12.2741	77.0573		5.27421	73.2906		13.2739	75.3186		6.27502	67.812		14.2738	68.9185		7.27397	62.0681		15.2734	75.3364		8.27359	79.5147		16.2743	80.9402
1.27542	110.328		9.27641	134.175		2.274	73.7021		10.2753	81.6232		3.27419	70.7974		11.2752	73.723		4.27464	85.3362		12.2757	73.4009		5.27511	75.7719		13.2753	76.3385		6.27592	73.7051		14.2747	66.3477		7.27564	68.0059		15.2752	81.5814		8.27442	71.6503		16.2758	82.843
1.2766	112.696		9.27752	136.537		2.27539	67.6063		10.2771	80.7374		3.27523	79.3805		11.2767	77.0841		4.27603	82.9891		12.2765	69.2257		5.27664	62.4528		13.2761	79.1926		6.27682	66.977		14.2757	79.127		7.27696	70.9644		15.2767	85.5837		8.27581	66.297		16.2766	69.6014
1.27757	101.751		9.27925	128.189		2.2772	69.4792		10.2784	77.2153		3.27689	83.3857		11.2776	74.3821		4.2777	71.1582		12.2775	74.8712		5.2783	67.5615		13.2773	74.8623		6.27835	73.2965		14.2773	66.81		7.27793	59.7359		15.2776	87.4268		8.27769	71.5877		16.2777	66.7653
1.27896	99.7289		9.28071	141.571		2.27859	72.9476		10.2791	79.5296		3.27856	97.2416		11.2788	69.4344		4.27901	75.8703		12.2791	77.4599		5.27942	79.8219		13.279	76.1954		6.28002	66.0256		14.2789	71.9336		7.27925	61.9637		15.2786	84.6622		8.27901	79.0912		16.2793	64.9818
1.28077	103.003		9.28168	140.563		2.27935	69.2048		10.2805	68.6083		3.2796	95.4254		11.2806	69.3837		4.27999	90.5314		12.2807	70.7079		5.28039	92.3924		13.2805	70.8689		6.28113	75.9299		14.2799	69.0766		7.28098	63.8336		15.2803	83.1889		8.27977	84.7248		16.2809	72.8045
1.28216	115.225		9.28279	144.35		2.28053	76.1506		10.2822	70.0249		3.28044	89.7948		11.2821	83.18		4.28124	85.5151		12.2818	67.6361		5.28185	73.4755		13.2814	74.7996		6.28217	89.6039		14.281	69.0497		7.28244	71.4087		15.2818	89.2609		8.28102	84.1701		16.2819	57.5678
1.28306	121.434		9.28446	135.248		2.2822	65.0355		10.2835	72.6792		3.28196	92.9083		11.2829	83.6899		4.28297	88.5213		12.2828	80.1112		5.28365	84.4296		13.2826	69.9027		6.28363	72.8045		14.2825	71.024		7.28342	84.3132		15.2828	79.5564		8.28269	76.7739		16.283	68.5368
1.28431	118.762		9.28613	133.617		2.28366	66.0256		10.2844	72.3333		3.28363	86.9645		11.284	76.926		4.2845	104.617		12.2844	70.0041		5.28497	83.4185		13.2843	65.116		6.28536	71.3938		14.2842	70.5379		7.2846	70.851		15.2839	83.7585		8.28415	79.4252		16.2846	68.7425
1.28605	106.907		9.28717	118.255		2.2847	71.2775		10.2857	68.4145		3.28481	80.3706		11.2857	70.7616		4.2854	105.765		12.2862	67.5407		5.28587	71.8292		13.286	63.9559		6.28668	75.7808		14.2855	74.8444		7.28633	66.4819		15.2855	88.8881		8.28512	87.1584		16.2863	58.8174
1.28757	104.399		9.28821	121.386		2.28581	77.445		10.2875	75.3156		3.28578	82.5805		11.2872	69.9056		4.28658	103.707		12.2873	66.983		5.28719	75.3722		13.287	67.481		6.28765	69.67		14.2864	74.3165		7.28786	61.5909		15.2872	90.433		8.2863	84.5936		16.2875	67.3826
1.28855	103.248		9.28981	125.684		2.28748	75.6675		10.289	70.3828		3.28724	89.6337		11.2883	67.2066		4.28832	91.3903		12.2882	81.2981		5.289	76.9052		13.288	79.8368		6.28897	70.7079		14.2878	86.2428		7.28883	73.9735		15.2883	91.7989		8.28797	73.6842		16.2884	68.9006
1.28973	108.485		9.29154	119.889		2.28914	79.1896		10.29	69.339		3.28905	87.3582		11.2893	59.5093		4.28999	92.9351		12.2897	76.5383		5.29039	68.0357		13.2896	84.2268		6.29071	74.5998		14.2896	88.0352		7.29001	74.397		15.2893	88.3632		8.28956	71.5638		16.2899	69.2525
1.29153	112.356		9.29272	124.95		2.29025	77.43		10.2911	71.3044		3.29037	93.63		11.291	73.0192		4.29089	87.2031		12.2915	66.8965		5.29136	77.8446		13.2914	87.5371		6.29217	74.3732		14.291	84.2983		7.29175	76.2282		15.2908	83.5736		8.29061	85.0708		16.2917	66.4998
1.29306	121.049		9.29363	116.928		2.29123	72.5718		10.2928	77.6776		3.29127	88.8523		11.2926	63.5593		4.292	81.3935		12.2928	71.5459		5.29261	80.5973		13.2925	69.8042		6.29307	77.1885		14.2919	75.4647		7.29335	67.8717		15.2926	82.9444		8.29172	90.2928		16.293	72.9804
1.29389	111.888		9.29522	118.016		2.29282	72.1424		10.2944	68.1282		3.29259	91.0175		11.2937	74.567		4.29374	87.9099		12.2937	76.7113		5.29442	72.9506		13.2934	70.9703		6.29432	70.0041		14.2933	75.5989		7.29425	66.0883		15.2938	78.957		8.29331	78.7303		16.2939	76.8455
1.29494	112.261		9.29703	123.429		2.29456	75.7778		10.2955	68.6173		3.29439	89.2251		11.2947	89.2669		4.2954	98.017		12.2951	83.171		5.29587	79.3208		13.295	71.4863		6.29613	60.9139		14.2951	75.4468		7.29522	75.9866		15.2947	82.7296		8.29498	84.0866		16.2953	67.6808
1.2966	114.047		9.29814	128.878		2.29567	67.6808		10.2965	77.4927		3.29585	92.2045		11.2962	76.5711		4.29631	97.5637		12.2969	70.866		5.29671	76.8455		13.2969	62.2172		6.29759	58.877		14.2964	69.3629		7.29682	77.4688		15.2962	83.4603		8.29609	90.3465		16.2971	61.57
1.29813	112.905		9.29897	109.881		2.29664	70.0309		10.2982	78.3337		3.29676	93.2334		11.298	66.3835		4.29721	86.9258		12.2982	70.6184		5.29775	74.2926		13.298	73.8751		6.29842	75.9568		14.2972	68.4413		7.29842	63.2133		15.298	71.528		8.29713	77.9191		16.2984	69.2287
1.29924	112.481		9.30036	112.481		2.29817	82.5686		10.2999	75.2947		3.29801	105.386		11.2993	68.1043		4.29881	89.6248		12.299	71.0658		5.29948	66.0137		13.2987	77.4658		6.29953	74.6416		14.2984	78.6886		7.29953	65.8944		15.2993	73.6216		8.29873	81.4383		16.2991	75.25
1.30028	106.869		9.30203	117.098		2.29998	78.3814		10.3009	71.5936		3.29988	99.6752		11.3002	73.8006		4.30047	91.3217		12.3003	60.0342		5.30094	56.852		13.3002	83.3798		6.3012	73.7111		14.3001	70.3023		7.3005	73.4785		15.3001	86.6573		8.30054	83.8987		16.3005	63.2491
1.30181	107.963		9.30335	126.957		2.30109	79.9829		10.3018	70.8123		3.30134	91.7422		11.3017	71.4863		4.30158	85.6642		12.302	70.6661		5.30198	67.7435		13.3019	68.4145		6.30272	75.2947		14.3016	68.0924		7.30203	77.1109		15.3014	78.8288		8.30158	83.1979		16.3021	66.139
1.30355	120.787		9.30425	109.615		2.30192	85.2765		10.3033	76.0343		3.30217	95.9473		11.3035	59.9357		4.30256	93.0395		12.3034	73.0132		5.3031	70.9137		13.3031	73.9944		6.3037	62.1337		14.3026	56.0378		7.30383	76.592		15.3031	89.4249		8.30234	80.2901		16.3035	81.2385
1.3048	121.518		9.30557	113.483		2.30331	79.3		10.305	73.9288		3.30328	93.123		11.3047	60.0073		4.30408	105.515		12.3044	77.6269		5.30469	67.6331		13.3041	68.492		6.30481	68.6143		14.3037	55.4414		7.30508	81.3727		15.3044	96.3648		8.3038	79.3178		16.3045	78.5663
1.3057	105.962		9.30738	121.145		2.30505	68.5368		10.3061	72.5003		3.30495	81.7335		11.3055	73.4546		4.30589	100.296		12.3056	75.4885		5.30643	66.6937		13.3055	62.7898		6.3064	86.553		14.3054	64.0991		7.30599	84.015		15.3053	87.722		8.30554	75.7748		16.3057	71.8501
1.30716	106.857		9.30884	111.876		2.3063	63.091		10.3071	68.4831		3.30648	75.2172		11.3069	75.6764		4.30714	99.5112		12.3073	63.1566		5.30754	70.7228		13.3072	80.8359		6.30814	76.771		14.307	75.414		7.30737	72.8581		15.3066	83.2963		8.30672	73.7946		16.3074	63.0075
1.30896	108.294		9.30974	120.739		2.30727	72.9387		10.3086	74.5968		3.30752	90.9072		11.3085	68.0685		4.30804	95.3598		12.3089	73.4636		5.30844	78.3486		13.3087	80.4004		6.30925	65.3009		14.3081	71.7845		7.30918	61.412		15.3083	79.1598		8.30769	81.0476		16.309	61.6834
1.31028	105.676		9.31092	111.819		2.30859	68.8648		10.3103	78.8228		3.30863	95.8369		11.3099	69.3986		4.30943	91.9212		12.3099	76.4399		5.31004	81.0864		13.3096	74.3761		6.31022	68.4294		14.3091	72.6852		7.3105	75.0323		15.3099	79.3417		8.30908	82.9742		16.31	79.5356
1.31119	110.895		9.31272	110.337		2.31039	68.2803		10.3116	75.9508		3.31023	91.6975		11.3108	71.1761		4.31124	90.6238		12.311	77.5553		5.31178	73.3025		13.3108	72.879		6.31175	65.8914		14.3107	72.4406		7.3114	77.7641		15.3109	71.0837		8.31081	78.1428		16.3111	68.6889
1.31257	107.841		9.31425	118.625		2.31185	72.4466		10.3125	82.9801		3.3119	82.9801		11.3121	84.1611		4.31256	101.128		12.3127	73.4993		5.31296	78.3337		13.3126	75.08		6.31349	68.4055		14.3124	71.6473		7.31279	78.45		15.312	77.8177		8.3122	76.7113		16.3127	64.4987
1.31445	108.279		9.31522	113.349		2.31282	90.4181		10.3139	75.8017		3.31301	92.5892		11.3138	73.7379		4.31346	103.156		12.3144	69.9414		5.31393	81.8051		13.3141	72.1275		6.31467	73.5113		14.3135	77.7999		7.3146	66.8786		15.3137	87.5371		8.31317	80.8537		16.3144	63.7084
1.3157	101.107		9.31634	112.547		2.314	87.4268		10.3157	79.1508		3.31398	94.9959		11.3153	73.4606		4.31485	88.6316		12.3154	77.3734		5.31546	73.9139		13.3151	72.9595		6.31564	73.7856		14.3145	74.3254		7.31592	68.2624		15.3153	88.4766		8.31442	90.3912		16.3155	65.5246
1.31646	109.418		9.31807	113.859		2.31574	70.8302		10.3171	79.4401		3.31551	85.2616		11.3163	63.3296		4.31665	85.3899		12.3164	74.6326		5.31726	69.4374		13.3162	68.1968		6.31717	69.9891		14.3161	65.1637		7.31675	69.3837		15.3164	87.0093		8.31616	93.1827		16.3165	62.8286
1.31771	105.858		9.31974	114.017		2.31727	71.0628		10.318	77.1706		3.31731	90.7073		11.3174	67.5854		4.31804	77.0334		12.3181	65.0534		5.31844	63.3923		13.318	67.9582		6.31897	61.7937		14.3178	66.7086		7.31793	61.3404		15.3174	70.3232		8.31769	86.4217		16.3182	64.1975
1.31945	115.911		9.32064	101.802		2.31824	74.57		10.3193	64.0752		3.31849	96.4245		11.3192	57.7318		4.31881	91.9689		12.3198	58.8025		5.31921	62.2351		13.3196	66.4044		6.32009	84.0597		14.319	67.0635		7.31967	67.3587		15.3191	73.3532		8.31859	79.4938		16.3199	61.6208
1.32077	115.869		9.32154	110.925		2.31942	68.4413		10.3212	59.1752		3.31939	87.06		11.3208	57.5737		4.31999	96.4543		12.3208	66.309		5.3206	65.2532		13.3205	80.9074		6.32085	82.1391		14.3198	69.9265		7.32112	63.0463		15.3208	72.9655		8.31977	82.0974		16.3209	70.6124
1.32174	111.124		9.32314	111.408		2.32116	79.9024		10.3225	74.4149		3.32092	83.6482		11.3219	65.0027		4.32172	91.5006		12.3216	87.1733		5.32226	71.8173		13.3214	67.1291		6.32224	69.8281		14.3212	62.9121		7.3221	71.9485		15.3218	63.7263		8.32158	81.0983		16.3217	71.862
1.32299	115.034		9.32481	93.0485		2.32275	76.4489		10.3233	77.1229		3.3228	83.6303		11.3229	66.7325		4.32318	92.1776		12.3232	78.6945		5.32358	76.8216		13.323	65.5007		6.32397	67.6212		14.3229	68.2176		7.32321	79.2075		15.3227	58.1553		8.3231	82.0944		16.3232	77.2809
1.32466	112.559		9.32585	91.8615		2.32366	67.4929		10.3244	75.2261		3.32391	90.928		11.3246	75.1963		4.32408	94.6679		12.3249	80.7345		5.32455	77.0304		13.3246	76.6159		6.32529	68.6918		14.3242	65.8944		7.32494	71.1403		15.3242	82.8787		8.32401	88.7957		16.3249	70.5975
1.32625	96.7018		9.32689	94.8856		2.3247	76.8545		10.3262	71.1463		3.32474	80.4153		11.3262	65.3576		4.32526	111.432		12.3261	67.0038		5.3258	77.2183		13.3257	83.514		6.3262	67.8777		14.3251	69.6134		7.32654	78.787		15.3259	71.5728		8.32498	90.4538		16.3261	67.2156
1.3273	103.934		9.32842	110.069		2.3263	83.672		10.3276	57.4843		3.32613	78.8347		11.3272	62.9091		4.32693	101.208		12.327	69.7506		5.32754	73.7856		13.3267	81.5367		6.32752	72.0291		14.3265	60.4517		7.32758	75.9806		15.327	78.7452		8.32665	80.2931		16.3271	75.1396
1.32841	105.828		9.33016	117.569		2.32789	81.5785		10.3287	65.0415		3.3278	89.3056		11.3281	66.637		4.3286	91.0921		12.3284	67.3707		5.32907	74.9756		13.3282	70.6781		6.32925	78.6409		14.3283	59.8463		7.32862	75.2142		15.328	82.7714		8.32824	87.9606		16.3285	71.7696
1.33007	109.86		9.33141	103.648		2.329	70.7675		10.3298	74.6237		3.32912	97.0478		11.3296	62.5304		4.32964	99.4127		12.3303	72.6404		5.33004	85.5688		13.3301	62.5274		6.33078	71.8084		14.3296	62.8554		7.33022	76.3385		15.3294	78.9033		8.32929	89.5442		16.3302	67.8091
1.33174	110.397		9.33231	93.7046		2.32998	69.336		10.3314	80.4004		3.33009	91.9629		11.3313	56.6164		4.33068	93.9581		12.3316	71.4684		5.33115	78.9451		13.3312	71.0538		6.33175	72.0976		14.3306	63.1805		7.33196	78.1518		15.3312	86.4784		8.33033	81.7365		16.3316	62.6228
1.33285	107.802		9.33377	106.57		2.33151	83.4066		10.333	79.118		3.33134	89.7798		11.3324	50.9679		4.33228	99.5947		12.3325	67.9791		5.33289	78.8675		13.3321	92.3446		6.33293	70.9107		14.3318	62.7689		7.33307	72.381		15.3325	94.143		8.33185	78.8556		16.3325	72.5182
1.33382	108.309		9.3355	107.125		2.33331	78.2233		10.3341	85.873		3.33308	90.3853		11.3334	52.6976		4.33401	101.33		12.3338	74.7489		5.33448	85.1215		13.3336	89.759		6.3346	78.2025		14.3336	80.9015		7.33404	65.2771		15.3335	93.9581		8.33359	77.8655		16.3338	71.0002
1.33549	104.581		9.33682	102.434		2.33456	89.58		10.3352	84.3699		3.3346	86.371		11.3349	55.4116		4.33513	101.435		12.3356	75.7182		5.33553	78.3814		13.3354	66.801		6.3362	74.7191		14.3351	82.2525		7.33564	74.9368		15.3348	92.9739		8.33477	81.6351		16.3356	59.2647
1.33723	107.99		9.33772	103.841		2.33546	80.642		10.3367	74.6475		3.33558	94.0326		11.3367	66.5356		4.3361	84.9723		12.3371	68.0268		5.33657	82.4493		13.3367	62.4946		6.33724	76.7948		14.336	70.013		7.33737	69.2823		15.3365	83.6034		8.33574	84.6353		16.3371	64.2303
1.3382	103.701		9.33911	108.932		2.33685	78.1607		10.3384	73.8334		3.33669	87.552		11.338	75.1665		4.3377	69.4404		12.338	67.8001		5.3383	94.1639		13.3376	71.6742		6.33828	69.7893		14.3372	68.2355		7.33849	70.2307		15.338	84.695		8.3372	77.7044		16.338	72.9864
1.3391	105.544		9.34099	105.303		2.33866	84.0717		10.3396	78.8854		3.33842	78.7542		11.339	72.6136		4.33943	87.1584		12.3392	68.6203		5.33997	86.046		13.339	70.0458		6.34002	69.8132		14.339	63.7233		7.33925	73.6485		15.3389	79.7652		8.33901	80.3378		16.3392	73.4069
1.34056	120.531		9.34231	86.0668		2.33998	72.1275		10.3406	67.3915		3.34002	80.8388		11.3403	61.2987		4.34054	99.2547		12.341	66.3418		5.34094	73.2876		13.3408	73.6276		6.34168	82.0288		14.3406	73.4695		7.34071	74.4388		15.3402	91.101		8.34026	83.5289		16.341	74.0183
1.3423	110.361		9.34307	97.1164		2.34088	76.6517		10.3421	63.0582		3.34106	76.1208		11.3421	58.6414		4.34138	90.087		12.3425	71.9157		5.34185	66.9561		13.3421	73.8781		6.34258	80.3139		14.3415	69.1809		7.34244	72.3661		15.342	84.1134		8.34116	82.0258		16.3425	67.8866
1.34348	100.776		9.34432	108.816		2.34227	81.817		10.3439	65.9362		3.3421	85.6732		11.3435	66.7116		4.34283	91.7869		12.3433	69.5179		5.34337	69.0109		13.3429	71.6831		6.34349	72.5927		14.3424	76.9022		7.34362	82.6521		15.3435	87.7519		8.34262	77.609		16.3433	76.0284
1.34438	95.3538		9.34599	104.721		2.34407	74.8712		10.3451	72.3333		3.34384	92.9351		11.3444	68.501		4.3445	92.4371		12.3444	66.9144		5.34504	68.8171		13.3442	73.5709		6.34508	78.5812		14.3441	68.8529		7.3446	68.8469		15.3442	80.8597		8.34442	76.6666		16.3443	72.9416
1.34584	92.4878		9.34745	102.279		2.34546	80.3587		10.3459	77.4151		3.34551	104.164		11.3457	71.5459		4.34575	88.7748		12.3461	66.7205		5.34615	75.9657		13.3458	71.2089		6.34668	80.0276		14.3457	68.2027		7.34598	71.6712		15.3453	81.492		8.34567	82.5417		16.3461	77.4062
1.34764	99.2875		9.34842	84.8769		2.34623	75.5035		10.3473	67.9463		3.34641	88.9537		11.3476	68.3757		4.34672	90.6745		12.3476	75.0323		5.34712	70.1114		13.3473	76.8336		6.34779	75.6735		14.3467	66.1807		7.34772	67.997		15.347	90.4926		8.34651	87.9696		16.3476	77.6597
1.34896	104.593		9.3496	90.9221		2.34741	67.827		10.3489	58.9605		3.34731	101.808		11.349	66.7712		4.34804	93.7463		12.3487	71.0121		5.34858	84.4832		13.3482	59.4884		6.34877	81.2236		14.3478	63.771		7.34911	65.1041		15.3485	84.1194		8.34776	86.4367		16.3486	75.2768
1.34987	110.224		9.35127	106.973		2.34914	60.0819		10.3503	71.0658		3.34884	94.5516		11.3497	67.0009		4.34985	101.721		12.3497	66.6191		5.35039	85.6165		13.3494	55.6919		6.35029	78.3247		14.3494	76.6874		7.35008	63.8784		15.3495	86.1802		8.34949	82.4881		16.3497	74.0421
1.35119	99.4903		9.35286	119.931		2.3506	63.434		10.3512	74.9309		3.35051	89.2281		11.3508	66.6937		4.35124	96.3052		12.3513	66.8249		5.35164	85.1185		13.3512	66.6758		6.3521	76.4369		14.3511	71.7547		7.35126	68.9125		15.3506	89.1446		8.35081	74.2777		16.3513	74.2211
1.35299	102.917		9.35391	114.736		2.35157	64.8148		10.3525	77.3734		3.35169	92.4759		11.3526	78.4381		4.35221	103.153		12.353	70.8421		5.35261	71.4266		13.3528	63.2521		6.35335	78.4888		14.3522	69.6909		7.35307	75.5035		15.3522	80.1947		8.35179	78.7542		16.353	68.6889
1.35445	111.339		9.35495	99.6155		2.35269	64.284		10.3543	73.6037		3.35266	91.7005		11.354	90.6059		4.35339	92.0166		12.3542	70.0219		5.35393	75.4945		13.3538	68.0178		6.35425	69.3181		14.3532	74.5133		7.3546	63.0075		15.3539	85.372		8.35304	81.0655		16.3541	78.4351
1.35535	110.143		9.35661	92.0613		2.35442	75.5571		10.3557	77.4211		3.35412	86.4635		11.3551	87.2866		4.3552	94.6142		12.3552	75.8703		5.35573	71.7696		13.3548	68.9632		6.35564	79.795		14.3546	73.1415		7.3555	64.8924		15.3551	87.9099		8.3547	86.4128		16.355	80.9164
1.3566	109.642		9.35828	112.165		2.35602	66.9651		10.3566	84.5131		3.35592	83.1322		11.3562	71.701		4.35672	94.9572		12.3566	71.6503		5.35712	70.6333		13.3565	73.3323		6.35745	68.832		14.3565	72.5569		7.35668	70.7168		15.356	94.5724		8.3563	89.0671		16.3566	71.6861
1.35841	106.048		9.35939	99.6185		2.35706	65.2801		10.3578	72.1961		3.35717	76.9946		11.3578	62.0174		4.3577	100.937		12.3584	77.1497		5.35803	74.5282		13.3582	83.6392		6.35877	73.9914		14.3577	85.023		7.35849	74.8384		15.3576	97.1283		8.35727	89.1416		16.3584	68.7634
1.35987	103.209		9.36036	92.0762		2.3581	67.4363		10.3596	77.1587		3.35814	83.6631		11.3595	79.1866		4.35881	98.8342		12.3597	70.1591		5.35935	70.5468		13.3593	74.6475		6.35967	71.4863		14.3586	75.5392		7.36001	70.6124		15.3594	97.9126		8.35838	82.9205		16.3596	70.1949
1.3607	97.4176		9.36196	83.3768		2.35977	66.0316		10.3612	76.5115		3.35953	85.1006		11.3606	84.5966		4.36054	102.058		12.3606	72.8104		5.36115	78.1279		13.3603	68.6471		6.36106	60.574		14.3601	57.2427		7.36085	70.0011		15.3605	85.3302		8.36005	91.1964		16.3605	72.0201
1.36181	110.734		9.36377	83.2456		2.36144	76.8902		10.3622	77.3286		3.36134	84.2059		11.3616	68.1282		4.36214	96.9881		12.3621	73.9974		5.36261	75.1337		13.3619	78.9003		6.36286	72.8909		14.3619	56.348		7.36189	83.0279		15.3614	88.3632		8.36172	88.2827		16.362	60.1952
1.36348	105.207		9.36481	86.0758		2.36255	75.0919		10.3632	81.1609		3.36266	80.1618		11.3632	63.1865		4.36304	92.8069		12.3639	68.6889		5.36337	74.9845		13.3637	71.2		6.36418	70.5767		14.3631	67.0486		7.36355	79.8159		15.363	84.516		8.36276	84.8322		16.3639	61.7162
1.365	98.4405		9.36564	99.9138		2.36352	81.3578		10.365	70.2009		3.36356	78.7393		11.3649	58.8114		4.36401	89.5144		12.3651	74.4596		5.36448	75.42		13.3648	73.4576		6.36502	61.6178		14.364	67.5943		7.36508	79.7234		15.3648	79.1777		8.36373	78.2919		16.365	62.3305
1.36605	103.406		9.3671	112.434		2.36512	81.5307		10.3666	77.0304		3.36495	92.2403		11.3661	61.9399		4.36568	91.3247		12.3659	74.3344		5.36622	80.7881		13.3656	76.7829		6.3662	66.1748		14.3652	63.0761		7.36612	70.3142		15.366	76.8962		8.36547	77.7879		16.3658	71.1463
1.36709	111.02		9.36877	102.663		2.36692	67.6361		10.3675	80.8716		3.36676	78.5037		11.3671	78.9391		4.36728	86.4426		12.3672	73.219		5.36768	80.0575		13.3671	81.1848		6.36786	76.1506		14.3669	75.071		7.36717	66.9352		15.3667	79.285		8.3672	84.1761		16.3671	70.9405
1.36869	96.0606		9.36995	99.6454		2.36796	66.5177		10.3685	83.5199		3.36814	76.085		11.3686	82.5388		4.36832	89.1476		12.3689	60.6575		5.36865	77.1139		13.3688	74.2419		6.36932	72.3839		14.3683	71.2656		7.36869	80.138		15.3681	81.1192		8.36817	77.7342		16.3689	70.0518
1.37042	113.215		9.37092	99.1891		2.3688	61.8474		10.3701	86.2786		3.36898	83.0279		11.3704	75.247		4.36936	81.3637		12.3703	57.3023		5.36976	86.043		13.37	69.0676		6.37029	64.4092		14.3693	64.8148		7.37043	76.6576		15.3698	89.3504		8.36901	84.0508		16.3702	69.0616
1.37153	117.945		9.37231	109.875		2.37025	72.8969		10.3717	74.8682		3.37009	85.1781		11.3715	56.855		4.37089	94.1937		12.3712	76.5025		5.37143	80.7374		13.3709	72.4883		6.3714	73.3234		14.3705	58.5847		7.37161	74.5312		15.3712	94.3249		8.37054	80.803		16.3711	75.1933
1.3725	107.528		9.37404	104.289		2.37199	73.7737		10.3728	90.6238		3.37183	86.9287		11.3723	69.9713		4.37263	84.0836		12.3725	80.2632		5.3731	66.0734		13.3723	81.1997		6.37307	70.2546		14.3722	67.8896		7.37258	69.7535		15.3721	81.3548		8.37213	86.9794		16.3723	69.7744
1.37403	103.233		9.37543	94.6858		2.37317	86.3502		10.3738	84.4236		3.37328	86.7707		11.3737	67.8001		4.37388	90.8863		12.3742	83.9733		5.37421	81.0804		13.3742	75.0621		6.37474	75.3066		14.3738	69.336		7.37404	59.0321		15.3734	81.5785		8.37331	83.5557		16.3741	72.5062
1.37584	106.535		9.3764	106.499		2.37414	87.1196		10.3753	74.0511		3.37433	88.6197		11.3753	80.0426		4.37478	95.4045		12.3757	82.0705		5.37525	77.442		13.3755	76.4727		6.37585	71.7368		14.3748	71.6205		7.37585	67.0128		15.3751	84.0836		8.37429	87.9278		16.3757	84.4266
1.37702	101.888		9.37759	96.0815		2.37553	75.0949		10.3771	74.1107		3.37544	92.5773		11.3767	79.3924		4.37624	95.0049		12.3767	70.4544		5.37678	77.9012		13.3765	78.0146		6.37682	70.4484		14.3758	68.7276		7.3771	72.9118		15.3766	85.9804		8.37574	91.4529		16.3766	73.72
1.37792	101.897		9.37939	111.688		2.37727	75.4229		10.3783	77.7432		3.37717	97.006		11.3776	66.1449		4.37797	109.794		12.3778	69.1988		5.37851	80.4899		13.3778	90.2451		6.37842	72.6583		14.3776	66.6311		7.378	75.9657		15.3776	83.8748		8.37748	91.6259		16.3777	73.2458
1.37945	106.731		9.38092	104.635		2.37866	70.6632		10.3793	82.4493		3.37884	85.3839		11.3789	69.9027		4.37929	96.2157		12.3796	75.7063		5.37969	74.3344		13.3795	85.8462		6.38015	80.0157		14.3792	64.3824		7.37946	76.9976		15.3787	84.9634		8.37887	99.028		16.3795	63.8605
1.38125	97.4921		9.38182	104.423		2.37963	90.8773		10.3806	77.5344		3.37988	83.851		11.3807	75.1754		4.38026	87.2896		12.3812	70.9286		5.38067	81.31		13.381	80.1499		6.38134	80.6211		14.3803	69.5627		7.38126	74.8623		15.3805	75.8226		8.37977	76.932		16.3811	66.7503
1.3825	87.4089		9.383	97.1283		2.38088	75.411		10.3824	79.4759		3.38092	81.0267		11.3822	78.6737		4.38165	89.1267		12.3823	68.2385		5.38219	83.0338		13.3819	77.6209		6.38224	64.7015		14.3812	64.3615		7.38251	68.7276		15.3821	78.0116		8.38109	92.5385		16.3821	61.5223
1.38327	90.3047		9.38481	94.5366		2.38262	79.461		10.3839	81.48		3.38252	90.3912		11.3831	82.1928		4.38346	92.1448		12.3833	71.3252		5.384	77.4658		13.3831	70.4097		6.38384	64.5434		14.3829	74.9487		7.38335	71.6205		15.383	79.6668		8.38283	81.9363		16.3832	69.8132
1.38459	102.574		9.3864	102.726		2.38414	75.08		10.3847	78.7244		3.38426	89.5204		11.3843	78.0295		4.38478	92.1896		12.385	77.7253		5.38511	76.5025		13.3849	64.2482		6.38564	69.843		14.3847	69.2525		7.3846	75.3007		15.3841	89.6009		8.38429	75.7659		16.3849	70.4723
1.38625	113.412		9.38724	95.3926		2.38512	67.7614		10.386	80.2125		3.38537	79.4491		11.386	89.1864		4.38561	96.7943		12.3866	78.2383		5.38594	76.3296		13.3864	61.8176		6.38675	62.092		14.3857	74.2419		7.38626	74.4119		15.3859	87.4357		8.38519	70.5439		16.3866	70.2546
1.38757	113.567		9.38821	94.2861		2.38623	71.4535		10.3879	66.7891		3.38627	80.2841		11.3876	86.1354		4.38686	98.3809		12.3876	73.8572		5.38733	78.9093		13.3873	63.6159		6.38758	73.216		14.3865	63.9231		7.38772	64.4957		15.3876	81.6798		8.38644	79.0733		16.3875	73.6007
1.38855	109.779		9.38988	95.4134		2.38803	73.6842		10.3893	69.5895		3.38787	80.0992		11.3886	70.7616		4.38853	91.2143		12.3885	79.3954		5.38907	76.6546		13.3883	69.9355		6.38897	69.1511		14.3881	71.6294		7.38869	72.3929		15.3885	84.8888		8.38831	90.9042		16.3884	61.6893
1.3898	102.338		9.39147	97.9395		2.38963	80.4988		10.39	78.6021		3.38967	90.1824		11.3897	79.6399		4.38999	82.6252		12.39	75.4379		5.39032	86.6991		13.39	74.0212		6.39064	72.6136		14.3898	84.7099		7.38987	84.6174		15.3894	83.9196		8.38977	94.4889		16.39	65.3725
1.39153	107.453		9.39252	91.6289		2.39046	77.6835		10.3912	74.1197		3.39078	82.0676		11.3915	77.6656		4.39096	93.8		12.3917	64.9311		5.39129	73.4039		13.3915	70.9435		6.39196	80.7315		14.391	77.3406		7.39154	65.6021		15.391	80.1857		8.3906	89.3027		16.3916	63.8485
1.39313	117.307		9.39356	94.0446		2.3915	69.8072		10.3929	82.6133		3.39162	91.8227		11.3931	69.0378		4.39214	95.0675		12.3929	62.2172		5.39261	74.5879		13.3926	71.9634		6.39293	73.3979		14.3919	63.4698		7.39314	58.8681		15.3926	84.9604		8.39165	89.6934		16.3927	60.0789
1.3941	104.513		9.39515	114.512		2.39317	77.4867		10.3944	74.394		3.39301	98.9743		11.394	60.6217		4.39388	86.7349		12.3939	69.3688		5.39435	83.6005		13.3936	74.23		6.39425	79.6936		14.3934	74.8175		7.39418	66.6311		15.3937	91.9152		8.39331	76.5085		16.3937	65.2085
1.39514	108.109		9.39682	108.634		2.3947	76.5294		10.3953	73.6544		3.39474	86.6365		11.3949	63.0403		4.39547	101.882		12.3953	73.902		5.3958	78.7273		13.3952	70.2665		6.39599	85.0827		14.3951	67.2782		7.39529	69.4881		15.3947	93.797		8.39491	77.3734		16.3952	65.2174
1.39688	115.13		9.39807	93.2781		2.39574	75.7927		10.3965	76.4787		3.39599	84.4206		11.3965	62.7749		4.39651	102.422		12.3971	73.1325		5.39678	65.8049		13.3969	63.1775		6.39745	68.7545		14.3965	73.046		7.39696	65.9749		15.3962	82.6372		8.39588	83.8271		16.397	60.8394
1.39855	117.662		9.39897	90.5582		2.39678	74.7221		10.3982	75.4289		3.39696	89.92		11.3982	63.0374		4.39756	105.446		12.3984	69.515		5.39796	58.0807		13.3981	65.3785		6.39835	59.7866		14.3974	70.183		7.39862	79.7145		15.398	68.6382		8.39699	85.527		16.3982	65.459
1.39959	123.25		9.40043	101.08		2.39838	76.1596		10.3998	71.0837		3.39828	94.5635		11.3992	62.6079		4.39915	100.039		12.3993	65.7155		5.39969	62.3514		13.3991	72.8552		6.39953	71.4684		14.3987	65.4679		7.39967	83.1472		15.3992	75.1068		8.39859	85.1453		16.3991	60.1743
1.40063	113.785		9.40224	97.1521		2.40005	78.9123		10.4009	63.434		3.40002	88.4378		11.4002	66.7563		4.40089	85.1662		12.4007	67.6331		5.40129	72.2885		13.4005	70.1591		6.40134	72.214		14.4005	67.7077		7.40064	67.9224		15.4002	83.0129		8.40033	94.7901		16.4005	66.1926
1.4023	111.437		9.40356	88.4855		2.4013	67.6152		10.4019	69.1094		3.40148	84.3043		11.4017	66.6967		4.402	91.0265		12.4025	67.7375		5.40226	75.8613		13.4023	67.1321		6.40286	66.0853		14.402	64.3555		7.40231	62.6974		15.4016	92.3297		8.40144	99.0728		16.4023	75.9955
1.40403	110.737		9.40439	104.184		2.40227	68.1312		10.4035	66.473		3.40245	78.7333		11.4035	67.6987		4.40297	95.3449		12.4039	76.592		5.40337	70.2576		13.4036	70.7139		6.40384	71.9694		14.4029	69.1809		7.40404	75.9866		15.4034	87.8592		8.40241	88.3543		16.4037	69.3301
1.405	114.948		9.40585	99.1473		2.40373	74.7519		10.4053	75.4468		3.40363	84.0687		11.4049	80.4243		4.40464	84.2894		12.4048	71.0598		5.40511	77.4181		13.4045	71.9843		6.40495	62.3126		14.4042	71.6115		7.40501	73.6037		15.4047	84.531		8.40394	75.4438		16.4046	67.2603
1.40591	111.727		9.40772	98.691		2.40553	79.637		10.4064	72.8104		3.40537	80.6509		11.4057	80.8866		4.40638	83.5945		12.406	70.7049		5.40678	82.2674		13.406	74.5849		6.40675	75.5124		14.406	72.6553		7.40585	81.8558		15.4056	77.1587		8.40567	71.4326		16.4059	66.5177
1.40744	100.307		9.40897	101.53		2.40678	72.3213		10.4073	65.5365		3.40696	74.8593		11.4071	71.5817		4.40742	87.9606		12.4079	67.4512		5.40761	64.7015		13.4078	73.6246		6.40835	75.4677		14.4075	70.4872		7.40737	75.42		15.4069	87.558		8.40686	83.7108		16.4077	66.0286
1.40903	110.403		9.40974	84.6115		2.40769	87.1882		10.4089	70.0011		3.40794	74.907		11.409	67.8001		4.40825	86.4426		12.4094	66.297		5.40858	62.6347		13.409	84.6025		6.40925	73.1027		14.4083	79.0584		7.40904	69.9056		15.4087	86.8542		8.40776	81.3846		16.4091	72.1126
1.41021	97.9663		9.41099	89.6904		2.40914	95.3598		10.4107	78.7124		3.40905	90.0512		11.4103	62.9538		4.40978	89.586		12.4101	66.3269		5.41018	57.0936		13.4098	72.0917		6.41015	76.3832		14.4094	72.0678		7.41022	68.3966		15.4101	82.3717		8.40929	80.5794		16.41	77.949
1.41119	105.783		9.41272	90.6686		2.41095	105.178		10.4118	69.9027		3.41078	91.1129		11.4112	61.1316		4.41145	90.6924		12.4112	60.8364		5.41178	62.6616		13.4111	75.6466		6.41175	65.3427		14.411	77.3137		7.41119	69.7983		15.411	84.3103		8.41109	91.7213		16.4111	77.5106
1.41264	114.673		9.41411	101.011		2.4122	77.433		10.4126	66.4223		3.41238	87.9725		11.4125	77.0185		4.41263	97.7277		12.4129	63.4847		5.41289	69.1929		13.4128	70.6751		6.41335	70.0309		14.4126	75.2052		7.41265	74.7638		15.4121	93.302		8.41234	100.782		16.4128	74.6147
1.41438	112.386		9.41509	92.7264		2.41296	62.9419		10.414	64.1826		3.41328	75.7927		11.4144	55.5577		4.4136	110.978		12.4144	67.7733		5.41386	75.6049		13.4142	81.9155		6.41446	70.687		14.4136	74.3612		7.41439	73.0878		15.4139	79.2314		8.41311	91.8555		16.4143	78.4112
1.4157	105.166		9.41627	105.27		2.41428	74.1554		10.4157	68.7694		3.41426	84.8352		11.4158	65.3695		4.41506	98.7358		12.4155	73.3472		5.41539	79.7175		13.4152	71.2805		6.4155	67.138		14.4146	56.7954		7.41578	71.4326		15.4153	82.6461		8.41449	91.1398		16.4152	68.6948
1.4166	105.855		9.41793	80.0873		2.41602	70.1025		10.417	71.9098		3.41585	96.1948		11.4165	81.143		4.41679	87.8741		12.4165	70.9703		5.41719	71.0956		13.4164	65.462		6.41703	61.5522		14.4163	72.9715		7.41668	68.659		15.4163	96.7287		8.41616	89.1386		16.4164	71.3014
1.41799	119.979		9.41953	83.7019		2.41734	75.2052		10.418	75.1426		3.41745	97.1044		11.4177	77.3704		4.41818	82.1332		12.4182	77.0244		5.41844	58.9009		13.4181	63.2223		6.41877	66.0853		14.4181	85.0618		7.418	72.2259		15.4174	88.9179		8.41748	88.2976		16.418	74.1465
1.4198	123.638		9.42057	99.6543		2.41831	72.8731		10.4193	80.3259		3.41856	82.6402		11.4194	74.9159		4.41908	81.9363		12.4198	71.5907		5.41935	71.7815		13.4197	70.0876		6.42002	68.9424		14.4192	76.2431		7.41974	80.1857		15.4191	84.0687		8.41845	80.4362		16.4197	82.7058
1.42119	120.283		9.42168	96.3439		2.41956	62.6735		10.421	66.9919		3.41953	80.9164		11.4208	80.1678		4.42033	86.5768		12.4209	65.1101		5.4208	78.8794		13.4207	74.1465		6.42092	64.5076		14.4201	63.2461		7.42119	80.8776		15.4207	87.7071		8.4197	79.9829		16.4208	67.0337
1.42209	106.755		9.42328	94.7365		2.42123	72.4824		10.4225	72.3839		3.42106	91.6319		11.4218	75.59		4.42207	89.5711		12.4219	73.3502		5.42254	72.7806		13.4218	73.4367		6.42238	71.1165		14.4216	66.974		7.4221	81.8498		15.4219	77.0632		8.42144	85.2944		16.4218	66.2523
1.42341	100.376		9.42495	94.6649		2.42282	79.0912		10.4234	69.4851		3.42287	91.9212		11.4229	72.7836		4.4236	93.1648		12.4235	88.0799		5.42386	71.6473		13.4235	72.2855		6.42411	70.4067		14.4234	74.409		7.42335	80.7017		15.4228	79.6131		8.42297	82.8937		16.4234	70.2009
1.42521	117.948		9.42606	91.951		2.42387	74.564		10.4246	80.2811		3.42419	89.4279		11.4246	58.8144		4.42457	86.5709		12.4253	67.0009		5.42476	72.9297		13.4252	76.8515		6.4255	66.2374		14.4246	71.1851		7.42515	71.8054		15.4244	87.0152		8.42394	87.5222		16.4251	79.8785
1.42667	100.892		9.42703	92.5057		2.42491	70.1711		10.4264	72.9685		3.42509	97.7784		11.4263	55.0507		4.42575	79.1658		12.4265	59.3691		5.42615	83.0249		13.4262	64.8059		6.4264	76.5562		14.4255	64.4927		7.42668	74.4746		15.4262	74.0958		8.42505	88.1157		16.4263	71.358
1.42744	106.341		9.4287	86.2637		2.42657	78.2293		10.4279	67.9045		3.42648	97.513		11.4274	48.2957		4.42756	94.3577		12.4274	62.0621		5.42796	79.5505		13.4272	62.1248		6.42779	77.1557		14.427	64.9222		7.42751	68.9066		15.4273	81.0029		8.42679	87.9875		16.4272	64.7999
1.42855	114.447		9.43043	90.9459		2.42831	85.6762		10.4289	72.3959		3.42828	94.5993		11.4284	63.595		4.42908	83.7585		12.4289	61.7907		5.42935	76.8216		13.4289	64.439		6.4296	73.6097		14.4288	71.8143		7.42855	66.6549		15.4282	81.4442		8.42838	91.614		16.4288	68.829
1.43028	111.924		9.43147	91.3396		2.42935	77.1915		10.43	76.8127		3.4296	86.6216		11.43	76.5622		4.42992	97.9753		12.4307	68.7545		5.43018	67.3826		13.4307	72.8134		6.43099	71.027		14.4301	73.7469		7.43022	69.0616		15.4298	78.5335		8.42942	98.7894		16.4306	66.3269
1.43174	116.791		9.43231	90.5373		2.43032	76.9499		10.4318	82.3419		3.43051	82.497		11.4317	78.0891		4.43096	90.8177		12.4319	68.1461		5.43136	72.3541		13.4317	66.5953		6.43175	79.1568		14.4308	71.1314		7.43175	64.779		15.4316	81.7902		8.43047	91.3992		16.4317	66.6221
1.43278	112.082		9.43377	94.0058		2.43206	77.612		10.4334	75.9657		3.43189	80.1022		11.4328	71.4863		4.43263	91.9599		12.4327	80.5883		5.43303	73.4158		13.4325	77.6776		6.43293	74.0779		14.4321	71.03		7.43279	69.0408		15.4327	92.1538		8.4322	82.8459		16.4325	70.1681
1.43389	105.795		9.43543	102.95		2.4338	77.779		10.4343	64.4182		3.43377	84.6234		11.4338	72.888		4.43415	87.8324		12.4341	74.7638		5.43448	70.8779		13.434	81.5158		6.43467	77.4539		14.4339	73.6037		7.43383	65.6618		15.4335	97.4563		8.43387	83.5945		16.4339	77.5911
1.43549	112.129		9.43661	89.3683		2.43477	74.397		10.4353	58.1404		3.43509	85.9207		11.4354	72.9864		4.43519	90.8087		12.4357	62.3305		5.43546	79.804		13.4357	73.6335		6.43613	74.6893		14.4352	63.3087		7.43543	77.77		15.435	76.8127		8.43477	84.2178		16.4356	80.2811
1.43716	93.2751		9.43758	87.4238		2.4356	68.6053		10.4369	65.2323		3.43585	85.9416		11.4371	63.947		4.43624	97.009		12.4371	70.019		5.43664	83.6542		13.4369	64.6001		6.43703	63.7084		14.4362	69.336		7.43717	74.5581		15.4366	79.4043		8.43567	87.561		16.4369	74.1405
1.43827	92.0434		9.43904	86.5142		2.43713	83.0428		10.4384	70.007		3.4371	80.7881		11.4383	70.1591		4.43783	98.7149		12.438	79.9829		5.4383	77.5463		13.4378	68.2027		6.43821	61.4478		14.4374	63.1328		7.43835	72.6017		15.4379	84.865		8.4372	89.914		16.4378	73.7021
1.43931	107.343		9.44078	79.9412		2.4388	78.9242		10.4396	70.7496		3.43877	74.9517		11.439	72.5957		4.43957	92.7532		12.4394	75.2828		5.43997	71.358		13.4393	69.0378		6.43988	63.6994		14.4392	66.804		7.43932	68.3757		15.4389	74.6982		8.43887	79.7801		16.4391	71.7308
1.44084	109.081		9.44217	86.4337		2.43998	74.743		10.4406	67.5943		3.44023	81.6918		11.4405	63.0374		4.44075	107.137		12.4411	68.1729		5.44101	71.0986		13.4411	67.4959		6.44154	62.9837		14.4407	59.5838		7.44078	71.0956		15.4402	79.3805		8.44005	91.1696		16.4409	64.5822
1.44257	105.524		9.44307	93.3169		2.44088	68.325		10.4421	66.6758		3.4412	84.7099		11.4422	58.9247		4.44172	93.3586		12.4425	71.7219		5.44198	75.1933		13.4424	58.8561		6.44258	80.645		14.4417	69.5179		7.44251	79.0345		15.442	85.1841		8.44102	105.473		16.4424	81.3548
1.44375	99.5499		9.44439	82.4553		2.44234	71.3133		10.4439	64.612		3.44238	84.8053		11.4434	71.2507		4.44318	85.9088		12.4435	70.9793		5.44365	83.7019		13.4433	63.0523		6.44356	77.7909		14.4428	75.1486		7.44376	78.4172		15.4434	82.4732		8.44248	110.51		16.4433	69.1153
1.44473	115.499		9.4462	77.0006		2.44414	71.3193		10.4451	76.7173		3.44405	86.7707		11.4444	66.6549		4.44492	98.1274		12.4447	70.7705		5.44539	79.6638		13.4446	70.3858		6.44515	66.9084		14.4445	60.0043		7.44467	75.9896		15.4444	83.1591		8.44429	101.545		16.4445	78.2711
1.44625	112.958		9.44759	83.4931		2.44553	74.1465		10.446	79.5803		3.44571	82.4761		11.4457	62.414		4.44624	93.3735		12.4464	76.2997		5.4465	78.8705		13.4464	61.3136		6.44689	72.6613		14.4461	67.4989		7.44619	72.5659		15.4455	83.687		8.44554	91.7422		16.4462	77.093
1.44806	112.869		9.44856	89.4249		2.44644	84.9634		10.4474	76.8992		3.44676	74.4179		11.4475	60.5859		4.44714	78.5693		12.448	68.8022		5.4474	75.25		13.4478	70.8988		6.44807	79.3894		14.4471	62.8435		7.448	56.0319		15.4473	76.0969		8.44651	87.224		16.4478	68.0268
1.44917	113.325		9.44981	82.2882		2.44769	72.8283		10.4492	78.611		3.4478	77.7253		11.449	63.9201		4.4486	93.8149		12.4491	70.4484		5.449	79.0882		13.4488	73.0878		6.44897	74.7877		14.4482	64.2601		7.44918	75.9419		15.4489	72.0052		8.44783	92.8039		16.4488	55.8798
1.45	114.646		9.45161	88.8583		2.44949	77.0513		10.4505	81.8349		3.44939	87.1763		11.4499	75.0531		4.4504	91.0652		12.4501	66.4312		5.4508	69.2137		13.4501	67.32		6.45057	64.0185		14.4499	71.0807		7.44994	85.9953		15.4498	78.2949		8.44963	93.5137		16.4499	57.0697
1.45139	114.655		9.45307	88.1992		2.45102	84.355		10.4514	80.4899		3.45113	78.7631		11.451	80.135		4.45165	96.7257		12.4519	71.7159		5.45191	77.1795		13.4519	70.684		6.45238	64.5762		14.4516	69.7267		7.45126	79.2045		15.451	80.1917		8.45102	91.2978		16.4516	64.612
1.45306	100.85		9.45391	81.7216		2.45192	85.8163		10.4528	74.7191		3.45224	82.7058		11.4528	67.4184		4.45242	91.1636		12.4535	59.5808		5.45268	77.1348		13.4533	70.3053		6.45342	63.8068		14.4526	67.7166		7.453	75.5363		15.4528	87.9427		8.45192	76.9946		16.4533	68.6083
1.45438	105.273		9.45495	79.0882		2.45317	72.9088		10.4547	79.6191		3.45321	73.213		11.4544	76.0969		4.45367	91.6348		12.4544	69.5985		5.45414	74.6326		13.4541	67.7942		6.45425	69.3688		14.4535	64.1527		7.45432	77.5762		15.4544	85.1543		8.45324	96.4245		16.4541	69.6611
1.45528	116.677		9.45661	95.1629		2.45498	62.3335		10.456	74.7012		3.45481	75.4498		11.4553	74.5133		4.4554	97.7665		12.4553	75.3573		5.45587	79.6936		13.4552	64.0305		6.45571	65.7214		14.455	70.6005		7.45529	80.5704		15.4552	89.9797		8.45505	101.223		16.4551	66.4163
1.4566	114.661		9.45821	85.9326		2.45644	66.9531		10.4568	77.3376		3.45662	81.4442		11.4565	80.4959		4.45679	86.7319		12.4569	67.6928		5.45712	73.9318		13.4569	64.284		6.45745	69.0676		14.4566	77.2929		7.45654	79.3835		15.4562	85.6493		8.45651	84.4415		16.4567	69.5716
1.45834	106.699		9.45918	81.1639		2.45727	73.896		10.458	76.094		3.45766	89.4906		11.4583	76.3445		4.45776	94.2712		12.4586	69.3301		5.4581	67.2603		13.4585	69.0259		6.45863	63.5115		14.4578	79.6817		7.45828	67.0128		15.4578	72.0022		8.45727	83.5199		16.4583	70.6512
1.4598	109.821		9.46029	83.01		2.45831	75.6735		10.4597	66.6132		3.45842	85.2407		11.4599	78.2323		4.45894	100.137		12.4597	72.9178		5.45942	80.135		13.4594	59.2409		6.4596	62.8226		14.4587	76.3713		7.4598	66.4283		15.4594	77.1736		8.45838	81.1937		16.4594	68.7962
1.46077	107.805		9.46189	85.9953		2.45998	73.4546		10.4611	74.6058		3.45988	81.0446		11.4607	73.2965		4.46075	79.0017		12.4607	70.52		5.46122	86.3203		13.4605	68.6203		6.46092	66.4461		14.4602	76.3624		7.46078	69.4434		15.4605	86.1116		8.46012	98.6015		16.4604	80.2036
1.46195	112.952		9.46356	86.8452		2.4615	74.7758		10.4621	75.6585		3.46162	83.1322		11.4617	72.1275		4.46235	96.2217		12.4622	74.0809		5.46261	73.723		13.4621	70.3739		6.46272	73.1981		14.462	72.7538		7.46189	76.4727		15.4615	83.4901		8.46158	86.4516		16.4619	70.7168
1.46369	109.487		9.46474	87.5759		2.46255	71.7099		10.4633	66.9293		3.4628	83.9375		11.4633	77.0006		4.46332	101.342		12.4639	72.3303		5.46358	81.0357		13.4639	73.0609		6.46411	75.7122		14.4633	70.0607		7.46362	79.1538		15.463	79.3924		8.46255	90.5702		16.4637	66.1121
1.46528	104.304		9.46571	85.4107		2.46366	77.3853		10.465	72.3571		3.46377	79.0972		11.4649	73.5262		4.46436	96.7764		12.4653	78.8616		5.46476	82.1153		13.465	63.1924		6.46509	72.1782		14.4642	62.4767		7.46529	71.2626		15.4648	76.5115		8.46366	94.7365		16.465	73.3771
1.46632	97.2714		9.46717	83.5199		2.46526	73.0848		10.4666	68.2326		3.46516	67.8449		11.466	72.6583		4.4661	91.0771		12.4662	80.3766		5.4665	72.3213		13.466	60.2191		6.46627	69.846		14.4656	67.1858		7.46626	68.1998		15.466	82.0616		8.46533	115.437		16.4659	74.5611
1.46737	96.5944		9.46897	95.3329		2.46699	62.7928		10.4676	69.9146		3.46696	76.0492		11.467	71.5907		4.46776	93.1439		12.4675	69.5		5.46803	71.7577		13.4675	69.5448		6.46807	70.2039		14.4674	68.4354		7.4673	76.1387		15.4669	89.7977		8.46699	116.293		16.4673	65.7036
1.4691	105.804		9.47015	104.73		2.4681	68.2803		10.4687	73.7141		3.46835	71.5966		11.4685	64.9102		4.46881	96.7137		12.4694	73.0043		5.469	75.1545		13.4693	71.3222		6.4696	66.3746		14.4688	69.6671		7.46904	79.1329		15.4684	81.1729		8.4681	105.02		16.4691	73.0848
1.47077	104.348		9.47106	94.3726		2.46907	71.4684		10.4703	67.1082		3.46933	77.5016		11.4703	69.2167		4.46985	85.0558		12.4707	72.1871		5.47018	73.3472		13.4705	65.9213		6.4705	65.0713		14.4697	67.2186		7.47071	79.0315		15.4701	81.3488		8.46908	95.7743		16.4704	71.7756
1.47167	105.237		9.47252	89.4965		2.4706	75.9389		10.4719	71.033		3.47051	83.6094		11.4715	69.5299		4.47151	85.4495		12.4716	71.3372		5.47191	66.1121		13.4714	61.3792		6.47168	70.5468		14.471	83.1979		7.47161	85.9028		15.4714	73.902		8.47067	95.1987		16.4713	67.1798
1.47257	113.588		9.47439	85.4406		2.47241	70.7765		10.473	66.0912		3.47224	90.0244		11.4724	67.32		4.47325	98.4226		12.473	62.0174		5.47351	64.2422		13.4729	64.8327		6.47349	65.3188		14.4728	78.6796		7.47251	73.6932		15.4723	74.7579		8.47241	100.301		16.4727	74.8802
1.47417	111.658		9.47557	84.4087		2.47359	65.7692		10.4741	75.6973		3.47377	78.11		11.4739	77.0304		4.47422	102.186		12.4748	66.0137		5.47435	67.1619		13.4747	59.7359		6.47509	69.3837		14.4743	76.4489		7.47404	60.8364		15.4737	86.2547		8.47359	104.05		16.4745	72.7717
1.47584	104.593		9.47634	91.8585		2.47449	66.7175		10.4757	81.6411		3.47474	81.146		11.4757	79.1866		4.47506	86.4844		12.4762	70.344		5.47539	71.3461		13.4759	65.1429		6.47592	76.4996		14.4751	67.8687		7.47571	64.1348		15.4756	95.3926		8.47449	109.556		16.4759	71.4326
1.47695	102.303		9.47772	90.093		2.47602	79.294		10.4774	75.6675		3.47592	76.3087		11.477	67.8896		4.47658	77.8714		12.4769	72.4317		5.47705	87.4268		13.4767	59.4228		6.47689	69.2644		14.4762	71.0508		7.47689	67.6838		15.4769	84.692		8.47602	105.813		16.4766	77.5583
1.47792	101.08		9.47939	77.8386		2.47782	91.268		10.4784	67.481		3.47766	67.5317		11.4778	67.2037		4.47832	84.1492		12.4781	68.1878		5.47858	76.756		13.478	67.1887		6.47856	75.2052		14.4779	64.7969		7.47786	79.971		15.4777	84.3669		8.47783	119.615		16.4778	76.6725
1.47945	100.534		9.48071	78.277		2.47907	76.7262		10.4793	72.2676		3.47926	82.1004		11.4793	73.6007		4.4795	82.8877		12.4798	68.9901		5.47962	83.5557		13.4797	83.4752		6.48008	73.4427		14.4794	69.002		7.47932	73.9586		15.4789	78.0355		8.47894	110.999		16.4796	68.6143
1.48119	107.71		9.48168	89.6844		2.47984	80.9194		10.4807	67.5794		3.48016	86.8065		11.4812	66.5058		4.48047	89.8455		12.4812	74.0421		5.48066	81.5785		13.481	71.2924		6.4812	80.0873		14.4805	72.4138		7.48105	71.5131		15.4807	74.0332		8.4797	118.983		16.481	68.7038
1.48244	107.206		9.48293	86.2726		2.48116	85.2378		10.4824	60.3145		3.48113	84.1194		11.4824	59.2826		4.48193	95.4343		12.4822	69.0109		5.48226	84.9544		13.482	66.1837		6.48224	76.4608		14.4816	79.4819		7.48237	69.7893		15.4821	83.2814		8.48109	115.887		16.4819	67.5586
1.48334	90.4807		9.48467	85.4644		2.48282	77.1139		10.4836	65.0295		3.4828	74.4328		11.4832	55.173		4.48374	97.1939		12.4834	64.8953		5.484	77.0185		13.4833	70.5319		6.48377	66.3626		14.4832	66.4402		7.48335	74.5432		15.483	86.7826		8.48283	104.262		16.4831	62.6884
1.48473	92.965		9.4862	86.4128		2.48414	68.4294		10.4846	69.4434		3.48439	78.4172		11.4844	52.8915		4.48506	99.0399		12.485	81.3428		5.48518	75.8673		13.4851	58.7428		6.4855	73.6335		14.4849	77.6149		7.48467	70.189		15.4842	83.7645		8.48408	118.228		16.4848	69.172
1.48653	93.7165		9.48717	80.3915		2.48512	74.3344		10.486	68.0834		3.48544	91.5543		11.4862	65.5872		4.48596	88.7509		12.4867	75.0173		5.48608	63.8426		13.4865	66.3805		6.48668	78.6945		14.486	76.5652		7.4864	73.1057		15.4859	83.0428		8.48505	122.89		16.4864	61.1645
1.48792	98.9952		9.48828	79.3596		2.48637	82.6789		10.4878	70.8719		3.48648	80.1648		11.4876	73.2727		4.48728	95.1719		12.4878	76.2311		5.48761	63.6219		13.4876	76.7471		6.48765	70.7616		14.487	63.7591		7.48786	78.4947		15.4876	83.7257		8.48637	110.722		16.4875	70.4723
1.48882	115.72		9.49002	72.208		2.4881	84.5995		10.4891	76.1357		3.48801	81.3399		11.4885	64.6568		4.48908	104.587		12.4888	75.8106		5.48941	75.1963		13.4887	75.3335		6.48911	73.1206		14.4885	65.2592		7.48883	81.7932		15.4886	81.3279		8.4881	106.749		16.4885	77.1706
1.49014	117.02		9.49161	69.3688		2.4897	81.5963		10.4901	89.1029		3.48974	88.2499		11.4897	68.3847		4.49054	94.9512		12.4904	74.3642		5.49067	74.5879		13.4904	77.4957		6.49092	70.3321		14.4903	73.3622		7.49008	75.7331		15.4896	83.5259		8.48956	111.148		16.4901	61.9756
1.49202	107.414		9.49265	83.5856		2.49067	73.6902		10.4913	80.8806		3.49099	76.2401		11.4914	73.72		4.49144	91.8526		12.4921	74.907		5.49157	73.2548		13.492	66.5356		6.49224	72.551		14.4915	75.3931		7.49189	74.0511		15.4912	76.2848		8.49053	112.926		16.4918	62.6139
1.49341	103.012		9.4937	94.1937		2.49178	72.8611		10.493	82.7863		3.49189	76.586		11.493	74.731		4.49269	82.0139		12.4933	64.7283		5.49303	75.5691		13.493	69.6372		6.49314	66.0763		14.4924	81.9572		7.49335	79.8427		15.493	79.8636		8.49172	91.265		16.493	78.9182
1.49417	113.728		9.49536	87.5878		2.49345	73.6634		10.4946	69.3062		3.49335	86.9228		11.494	76.926		4.4945	98.3898		12.4942	79.4371		5.49483	72.4078		13.4941	73.3055		6.49453	72.4704		14.494	78.0384		7.49411	73.6335		15.4941	79.4789		8.49345	100.913		16.4939	77.5792
1.49535	107.039		9.4971	81.3428		2.49512	74.564		10.4955	62.1605		3.49516	86.8035		11.4951	82.0347		4.49596	100.967		12.4958	83.3619		5.49615	68.4413		13.4958	67.484		6.4964	70.1323		14.4958	67.2842		7.49522	73.902		15.4951	74.7877		8.49505	101.673		16.4955	67.2424
1.49702	89.9349		9.49807	77.3137		2.49616	73.1981		10.4967	63.8903		3.49648	82.0556		11.4967	70.6035		4.49679	99.1473		12.4976	74.6326		5.49692	79.288		13.4975	72.1394		6.49765	67.6271		14.4969	67.7345		7.49696	73.5232		15.4966	88.2439		8.49602	122.29		16.4973	72.4436
1.49848	101.578		9.49891	84.0717		2.4972	73.3204		10.4985	80.803		3.49731	86.5619		11.4985	64.0573		4.4979	93.7254		12.4987	78.3128		5.49817	68.4383		13.4984	71.9008		6.49842	90.6596		14.4977	65.4292		7.49842	75.2947		15.4985	84.2536		8.49713	117.417		16.4984	73.6753
1.49945	102.353					2.49887	87.1912					3.49877	75.9269		11.4995	68.4383		4.49957	90.925		12.4995	66.8488		5.4999	69.0467		13.4993	77.1139		6.49967	78.9212		14.4991	68.6531		7.49939	75.584		15.4995	80.0068		8.49887	117.867		16.4992	71.0628
