# Supplementary material for: Binding and sequestration of poison frog alkaloids by a plasma globulin
Source: eLife journal article supplement (doi:10.7554/elife.85096), 2023-12-14
Supplement: fig5-data1 [file BSA+PTX_R1 analysis_CapillaryShapeRawData.xlsx]

## Sheet: RawData
NanoTemper Technologies	NanoTemper Technologies
MO.Affinity Analysis v3.0.5	MO.Affinity Analysis v3.0.5
Origin of exported data	Origin of exported data
Project Title:	20230407_BSA+PTX
Comment:
Project File Path:	C:\Users\nanotemper\Desktop\Aurora_MST\20230407_BSA\BSA+PTX analysis.nta3
Analysis-Set Name:	Analysis-Set #1
Exported from:	Capillary Shape (Raw Data Inspection)
Exported on:	2023-04-07 09:23:15
Sample Information	Sample Information		Sample Information	Sample Information		Sample Information	Sample Information		Sample Information	Sample Information		Sample Information	Sample Information		Sample Information	Sample Information		Sample Information	Sample Information		Sample Information	Sample Information		Sample Information	Sample Information		Sample Information	Sample Information		Sample Information	Sample Information		Sample Information	Sample Information		Sample Information	Sample Information		Sample Information	Sample Information		Sample Information	Sample Information		Sample Information	Sample Information
Merge-Set Name:	BSA+PTX_R1 (#16)		Merge-Set Name:	BSA+PTX_R1 (#16)		Merge-Set Name:	BSA+PTX_R1 (#16)		Merge-Set Name:	BSA+PTX_R1 (#16)		Merge-Set Name:	BSA+PTX_R1 (#16)		Merge-Set Name:	BSA+PTX_R1 (#16)		Merge-Set Name:	BSA+PTX_R1 (#16)		Merge-Set Name:	BSA+PTX_R1 (#16)		Merge-Set Name:	BSA+PTX_R1 (#16)		Merge-Set Name:	BSA+PTX_R1 (#16)		Merge-Set Name:	BSA+PTX_R1 (#16)		Merge-Set Name:	BSA+PTX_R1 (#16)		Merge-Set Name:	BSA+PTX_R1 (#16)		Merge-Set Name:	BSA+PTX_R1 (#16)		Merge-Set Name:	BSA+PTX_R1 (#16)		Merge-Set Name:	BSA+PTX_R1 (#16)
Run Name:	BSA+PTX_R1 (#16)		Run Name:	BSA+PTX_R1 (#16)		Run Name:	BSA+PTX_R1 (#16)		Run Name:	BSA+PTX_R1 (#16)		Run Name:	BSA+PTX_R1 (#16)		Run Name:	BSA+PTX_R1 (#16)		Run Name:	BSA+PTX_R1 (#16)		Run Name:	BSA+PTX_R1 (#16)		Run Name:	BSA+PTX_R1 (#16)		Run Name:	BSA+PTX_R1 (#16)		Run Name:	BSA+PTX_R1 (#16)		Run Name:	BSA+PTX_R1 (#16)		Run Name:	BSA+PTX_R1 (#16)		Run Name:	BSA+PTX_R1 (#16)		Run Name:	BSA+PTX_R1 (#16)		Run Name:	BSA+PTX_R1 (#16)
Date of Measurement:	2023-04-07 08:35:51		Date of Measurement:	2023-04-07 08:36:17		Date of Measurement:	2023-04-07 08:36:44		Date of Measurement:	2023-04-07 08:37:11		Date of Measurement:	2023-04-07 08:37:38		Date of Measurement:	2023-04-07 08:38:04		Date of Measurement:	2023-04-07 08:38:31		Date of Measurement:	2023-04-07 08:38:57		Date of Measurement:	2023-04-07 08:39:24		Date of Measurement:	2023-04-07 08:39:51		Date of Measurement:	2023-04-07 08:40:18		Date of Measurement:	2023-04-07 08:40:44		Date of Measurement:	2023-04-07 08:41:11		Date of Measurement:	2023-04-07 08:41:38		Date of Measurement:	2023-04-07 08:42:05		Date of Measurement:	2023-04-07 08:42:31
Capillary Type:	Monolith Premium Capillary		Capillary Type:	Monolith Premium Capillary		Capillary Type:	Monolith Premium Capillary		Capillary Type:	Monolith Premium Capillary		Capillary Type:	Monolith Premium Capillary		Capillary Type:	Monolith Premium Capillary		Capillary Type:	Monolith Premium Capillary		Capillary Type:	Monolith Premium Capillary		Capillary Type:	Monolith Premium Capillary		Capillary Type:	Monolith Premium Capillary		Capillary Type:	Monolith Premium Capillary		Capillary Type:	Monolith Premium Capillary		Capillary Type:	Monolith Premium Capillary		Capillary Type:	Monolith Premium Capillary		Capillary Type:	Monolith Premium Capillary		Capillary Type:	Monolith Premium Capillary
Capillary Position:	1		Capillary Position:	9		Capillary Position:	2		Capillary Position:	10		Capillary Position:	3		Capillary Position:	11		Capillary Position:	4		Capillary Position:	12		Capillary Position:	5		Capillary Position:	13		Capillary Position:	6		Capillary Position:	14		Capillary Position:	7		Capillary Position:	15		Capillary Position:	8		Capillary Position:	16
Ligand:	PTX		Ligand:	PTX		Ligand:	PTX		Ligand:	PTX		Ligand:	PTX		Ligand:	PTX		Ligand:	PTX		Ligand:	PTX		Ligand:	PTX		Ligand:	PTX		Ligand:	PTX		Ligand:	PTX		Ligand:	PTX		Ligand:	PTX		Ligand:	PTX		Ligand:	PTX
Ligand Concentration:	0.005		Ligand Concentration:	1.95313e-05		Ligand Concentration:	0.0025		Ligand Concentration:	9.76563e-06		Ligand Concentration:	0.00125		Ligand Concentration:	4.88281e-06		Ligand Concentration:	0.000625		Ligand Concentration:	2.44141e-06		Ligand Concentration:	0.0003125		Ligand Concentration:	1.2207e-06		Ligand Concentration:	0.00015625		Ligand Concentration:	6.10352e-07		Ligand Concentration:	7.8125e-05		Ligand Concentration:	3.05176e-07		Ligand Concentration:	3.90625e-05		Ligand Concentration:	1.52588e-07
Target:	BSA		Target:	BSA		Target:	BSA		Target:	BSA		Target:	BSA		Target:	BSA		Target:	BSA		Target:	BSA		Target:	BSA		Target:	BSA		Target:	BSA		Target:	BSA		Target:	BSA		Target:	BSA		Target:	BSA		Target:	BSA
TargetConcentration:	5e-09		TargetConcentration:	5e-09		TargetConcentration:	5e-09		TargetConcentration:	5e-09		TargetConcentration:	5e-09		TargetConcentration:	5e-09		TargetConcentration:	5e-09		TargetConcentration:	5e-09		TargetConcentration:	5e-09		TargetConcentration:	5e-09		TargetConcentration:	5e-09		TargetConcentration:	5e-09		TargetConcentration:	5e-09		TargetConcentration:	5e-09		TargetConcentration:	5e-09		TargetConcentration:	5e-09
Measurement Settings	Measurement Settings		Measurement Settings	Measurement Settings		Measurement Settings	Measurement Settings		Measurement Settings	Measurement Settings		Measurement Settings	Measurement Settings		Measurement Settings	Measurement Settings		Measurement Settings	Measurement Settings		Measurement Settings	Measurement Settings		Measurement Settings	Measurement Settings		Measurement Settings	Measurement Settings		Measurement Settings	Measurement Settings		Measurement Settings	Measurement Settings		Measurement Settings	Measurement Settings		Measurement Settings	Measurement Settings		Measurement Settings	Measurement Settings		Measurement Settings	Measurement Settings
MST-Power:	Medium		MST-Power:	Medium		MST-Power:	Medium		MST-Power:	Medium		MST-Power:	Medium		MST-Power:	Medium		MST-Power:	Medium		MST-Power:	Medium		MST-Power:	Medium		MST-Power:	Medium		MST-Power:	Medium		MST-Power:	Medium		MST-Power:	Medium		MST-Power:	Medium		MST-Power:	Medium		MST-Power:	Medium
Excitation-Power:	30		Excitation-Power:	30		Excitation-Power:	30		Excitation-Power:	30		Excitation-Power:	30		Excitation-Power:	30		Excitation-Power:	30		Excitation-Power:	30		Excitation-Power:	30		Excitation-Power:	30		Excitation-Power:	30		Excitation-Power:	30		Excitation-Power:	30		Excitation-Power:	30		Excitation-Power:	30		Excitation-Power:	30
Excitation type:	Pico - RED		Excitation type:	Pico - RED		Excitation type:	Pico - RED		Excitation type:	Pico - RED		Excitation type:	Pico - RED		Excitation type:	Pico - RED		Excitation type:	Pico - RED		Excitation type:	Pico - RED		Excitation type:	Pico - RED		Excitation type:	Pico - RED		Excitation type:	Pico - RED		Excitation type:	Pico - RED		Excitation type:	Pico - RED		Excitation type:	Pico - RED		Excitation type:	Pico - RED		Excitation type:	Pico - RED
Thermostat Setpoint:	25		Thermostat Setpoint:	25		Thermostat Setpoint:	25		Thermostat Setpoint:	25		Thermostat Setpoint:	25		Thermostat Setpoint:	25		Thermostat Setpoint:	25		Thermostat Setpoint:	25		Thermostat Setpoint:	25		Thermostat Setpoint:	25		Thermostat Setpoint:	25		Thermostat Setpoint:	25		Thermostat Setpoint:	25		Thermostat Setpoint:	25		Thermostat Setpoint:	25		Thermostat Setpoint:	25
Included	Included		Included	Included		Included	Included		Included	Included		Included	Included		Included	Included		Included	Included		Included	Included		Included	Included		Included	Included		Included	Included		Included	Included		Included	Included		Included	Included		Included	Included		Included	Included
Position [mm]	Relative Fluorescence [-]		Position [mm]	Relative Fluorescence [-]		Position [mm]	Relative Fluorescence [-]		Position [mm]	Relative Fluorescence [-]		Position [mm]	Relative Fluorescence [-]		Position [mm]	Relative Fluorescence [-]		Position [mm]	Relative Fluorescence [-]		Position [mm]	Relative Fluorescence [-]		Position [mm]	Relative Fluorescence [-]		Position [mm]	Relative Fluorescence [-]		Position [mm]	Relative Fluorescence [-]		Position [mm]	Relative Fluorescence [-]		Position [mm]	Relative Fluorescence [-]		Position [mm]	Relative Fluorescence [-]		Position [mm]	Relative Fluorescence [-]		Position [mm]	Relative Fluorescence [-]
-2.24842	0.00595321		-2.2418	0.00324325		-2.24823	0.00354239		-2.24698	0.00273686		-2.24772	0.00158359		-2.24878	0.00229067		-2.24506	0.00105455		-2.24699	0.00117823		-2.24357	0.00279156		-2.24631	0.00173145		-2.24399	0.00159875		-2.24627	0.000812524		-2.24869	0.000171002		-2.24789	0.000185812		-2.24915	0.000852971		-2.24732	0.00136579
-2.24123	0.00604163		-2.23649	0.00363971		-2.24354	0.0030194		-2.2426	0.00196472		-2.24147	0.00156932		-2.24159	0.00167908		-2.24037	0.00104279		-2.23917	0.00104313		-2.23919	0.00227804		-2.23913	0.0014825		-2.23743	0.00137957		-2.24033	0.00149939		-2.2415	0.000796268		-2.24164	0.000138083		-2.24478	0.00135489		-2.23982	0.00136185
-2.23342	0.00533907		-2.23243	0.00320812		-2.23979	0.00215717		-2.23541	0.00186175		-2.23804	0.00240162		-2.23378	0.00180521		-2.23569	0.00161377		-2.23323	0.000847097		-2.23419	0.00175416		-2.23381	0.00149702		-2.23305	0.00130848		-2.23627	0.00134576		-2.23369	0.00137527		-2.23414	0.00101808		-2.24103	0.000873274		-2.23389	0.00136338
-2.22842	0.0054904		-2.22587	0.00269092		-2.23323	0.00234383		-2.22823	0.00220314		-2.23272	0.00136282		-2.22878	0.00185832		-2.2285	0.00123256		-2.22917	0.000847769		-2.22638	0.00216223		-2.22944	0.00110874		-2.22774	0.00124146		-2.23064	0.00170744		-2.22838	0.00145646		-2.2282	0.00112242		-2.23384	0.00037372		-2.22951	0.000932853
-2.22404	0.00546621		-2.21805	0.00281583		-2.22542	0.00296397		-2.22323	0.00237		-2.22522	0.00105768		-2.22503	0.00176388		-2.22068	0.00135655		-2.22323	0.00175468		-2.21888	0.00267079		-2.22288	0.00114946		-2.22024	0.00173754		-2.22283	0.00173366		-2.22401	0.00123398		-2.22383	0.000926617		-2.22634	0.000552908		-2.22357	0.0015074
-2.21717	0.00489128		-2.2118	0.00325642		-2.2201	0.0041257		-2.21885	0.00191532		-2.21866	0.00172524		-2.21878	0.00176238		-2.21506	0.00143682		-2.21542	0.000417163		-2.21419	0.00327218		-2.21475	0.00192714		-2.21274	0.00113776		-2.21564	0.00166395		-2.21744	0.00134012		-2.21789	0.00103429		-2.22134	0.00102673		-2.21576	0.00168688
-2.20904	0.00480075		-2.20743	0.00362324		-2.21604	0.0041259		-2.21198	0.00135701		-2.21429	0.00108706		-2.21096	0.00164589		-2.211	0.00197314		-2.20886	0.000914085		-2.20951	0.00302748		-2.2085	0.00192648		-2.20806	0.00145678		-2.21127	0.00168099		-2.20932	0.000343137		-2.21008	0.000278163		-2.21697	0.000785451		-2.20889	0.00230543
-2.20373	0.00511959		-2.2018	0.0029245		-2.20948	0.00265273		-2.20385	0.00157063		-2.20897	0.000816348		-2.20534	0.0010161		-2.20444	0.0018027		-2.20449	0.00133618		-2.20232	0.00332513		-2.20444	0.00223266		-2.20368	0.00156954		-2.20627	0.00248434		-2.20369	0.00130905		-2.2032	0.00127249		-2.2104	0.000623733		-2.20483	0.00185564
-2.19967	0.00467736		-2.19368	0.00243518		-2.20167	0.00260043		-2.19823	0.00123473		-2.20147	0.000996826		-2.20096	0.00194933		-2.19631	0.00115501		-2.19917	0.00125216		-2.1945	0.00344568		-2.19881	0.00122342		-2.19618	0.0012521		-2.19877	0.00207961		-2.19963	0.00142698		-2.19914	0.000810734		-2.20259	0.00149441		-2.19951	0.000937668
-2.19279	0.00474747		-2.18712	0.00299562		-2.19542	0.00190507		-2.19417	0.00150477		-2.19397	0.000894205		-2.19503	0.00160649		-2.19069	0.00111487		-2.19136	0.000606925		-2.18951	0.00332491		-2.19069	0.00105107		-2.18837	0.00162977		-2.19096	0.00181671		-2.19307	0.00138434		-2.19383	0.000902863		-2.19634	0.00107158		-2.1917	0.0010668
-2.18467	0.00536456		-2.18305	0.00348187		-2.19104	0.00196188		-2.18791	0.00223432		-2.18929	0.00102474		-2.1869	0.00127864		-2.18662	0.000862053		-2.18417	0.00110295		-2.18544	0.00272554		-2.18413	0.000495706		-2.18337	0.000957076		-2.18627	0.00151359		-2.18494	0.00120858		-2.18601	0.00129824		-2.19228	0.00221612		-2.18451	0.00095868
-2.17935	0.004931		-2.17743	0.00354026		-2.18542	0.00259318		-2.17979	0.00223542		-2.1846	0.00161507		-2.18034	0.0015007		-2.18006	0.00196263		-2.17948	0.00160973		-2.17826	0.00280981		-2.18006	0.00162535		-2.1793	0.00132433		-2.18189	0.000743247		-2.17932	0.000864533		-2.17914	0.00134619		-2.18634	0.00160348		-2.17983	0.00169498
-2.17592	0.00500094		-2.1693	0.00309858		-2.1776	0.00278259		-2.17385	0.0015085		-2.17741	0.00133743		-2.17628	0.00153839		-2.17162	0.0020675		-2.1748	0.000803857		-2.17013	0.00170143		-2.17444	0.00166189		-2.1718	0.0020328		-2.17408	0.000517498		-2.17557	0.000863172		-2.17477	0.0010445		-2.17853	0.00165188		-2.17513	0.00152557
-2.16967	0.00492511		-2.16243	0.00271178		-2.17073	0.00305153		-2.16979	0.00160949		-2.1696	0.00177624		-2.17096	0.00147736		-2.166	0.00246091		-2.16698	0.00100168		-2.16544	0.00171586		-2.16631	0.0016696		-2.16368	0.0015478		-2.16658	0.00126861		-2.16994	0.00138729		-2.16946	0.000453541		-2.17196	0.000731624		-2.16732	0.00156431
-2.16185	0.00439447		-2.15868	0.00194498		-2.16667	0.00200007		-2.16385	0.00215221		-2.1646	0.0015668		-2.16315	0.000861277		-2.16287	0.00173945		-2.15948	0.00140317		-2.16169	0.00216177		-2.15975	0.00179198		-2.15868	0.00110991		-2.16221	0.00211567		-2.16213	0.00107976		-2.16164	0.000586961		-2.16759	0.000498373		-2.15982	0.00185038
-2.15592	0.00491465		-2.1543	0.00283603		-2.16104	0.00224785		-2.15542	0.00237088		-2.16022	0.000951706		-2.15596	0.00144909		-2.15694	0.0010886		-2.15511	0.0006188		-2.15513	0.00206218		-2.156	0.00208188		-2.15524	0.00142101		-2.15815	0.00128697		-2.15588	0.00109132		-2.15445	0.000455317		-2.16196	0.00107513		-2.15545	0.00159058
-2.15185	0.00529004		-2.1468	0.00311614		-2.15292	0.00233913		-2.14916	0.0019219		-2.15303	0.00112463		-2.15159	0.0015007		-2.14912	0.00145595		-2.15105	0.00105904		-2.14763	0.00202726		-2.15132	0.00205987		-2.14868	0.00165875		-2.15127	0.00182064		-2.1515	0.00211144		-2.15039	0.000648898		-2.15384	0.000464613		-2.15138	0.00170658
-2.14623	0.0042		-2.13993	0.00311197		-2.14604	0.00343877		-2.14573	0.00227296		-2.14491	0.00122284		-2.14659	0.00103109		-2.14319	0.00114513		-2.14417	0.000880927		-2.142	0.00255294		-2.14381	0.00161061		-2.14087	0.00118304		-2.14377	0.00200596		-2.14619	0.00178917		-2.14602	0.000646234		-2.14728	0.000715334		-2.1442	0.00158401
-2.13842	0.00465742		-2.13524	0.00254494		-2.14229	0.00381387		-2.14042	0.00214255		-2.14022	0.000684137		-2.13877	0.000795107		-2.13881	0.00138008		-2.13667	0.000542178		-2.13763	0.00222126		-2.13662	0.00133238		-2.13555	0.00124169		-2.13846	0.00182872		-2.13838	0.000906716		-2.13883	0.000274611		-2.14353	0.000597528		-2.1367	0.00188059
-2.13154	0.00533645		-2.13055	0.00279981		-2.1376	0.00338334		-2.1326	0.00215506		-2.13647	0.000681619		-2.13128	0.00128399		-2.13318	0.00122625		-2.13167	0.000193571		-2.13138	0.00249233		-2.13194	0.00222782		-2.13118	0.00213672		-2.1344	0.00158178		-2.13119	0.00106524		-2.13133	0.00016228		-2.13884	0.00109543		-2.13201	0.00224502
-2.12717	0.00526994		-2.12336	0.00289925		-2.1301	0.0023123		-2.12604	0.00205736		-2.13022	0.000939325		-2.12721	0.00195725		-2.12569	0.00083095		-2.1273	0.000936937		-2.12326	0.00229584		-2.12725	0.000977986		-2.12493	0.00139678		-2.12783	0.00178502		-2.12682	0.00133218		-2.12664	0.000759675		-2.13103	0.00145121		-2.12763	0.00196661
-2.12217	0.00594014		-2.11555	0.00315895		-2.12323	0.00239672		-2.12166	0.00203936		-2.12241	0.000423913		-2.12315	0.00177031		-2.1185	0.000857009		-2.12042	0.00134962		-2.11669	0.00260431		-2.12007	0.000500329		-2.1168	0.00118236		-2.1197	0.000736254		-2.12213	0.00117184		-2.12196	0.000971016		-2.12447	0.00106497		-2.12076	0.00129684
-2.11435	0.00496009		-2.11024	0.00341228		-2.11854	0.00258025		-2.11667	0.00166943		-2.11679	0.00101278		-2.11596	0.00121332		-2.11381	0.00207317		-2.11261	0.00112043		-2.11263	0.00268633		-2.11225	0.00184217		-2.11056	0.00043382		-2.11377	0.000730135		-2.11432	0.00225704		-2.11508	0.00168074		-2.11978	0.00140612		-2.11263	0.000948393
-2.10717	0.00481905		-2.10586	0.0026749		-2.11385	0.00272559		-2.10885	0.00144791		-2.11241	0.0013219		-2.10846	0.00144867		-2.10881	0.00242203		-2.10667	0.00139577		-2.10732	0.00237583		-2.10725	0.00126326		-2.10618	0.000223702		-2.10971	0.00130795		-2.10682	0.00220646		-2.10726	0.00202417		-2.11478	0.00107631		-2.10701	0.00057477
-2.10248	0.00528726		-2.0993	0.00349416		-2.10667	0.00246253		-2.10167	0.000919897		-2.10647	0.00136827		-2.10378	0.00132147		-2.10131	0.00133091		-2.10292	0.000587658		-2.09919	0.00223456		-2.10288	0.00204424		-2.10087	0.00158154		-2.10377	0.00126337		-2.10213	0.00135078		-2.10133	0.00159416		-2.10759	0.000614526		-2.10264	0.00142489
-2.09779	0.00549987		-2.09118	0.00219414		-2.09885	0.00271306		-2.09698	0.00146942		-2.09835	0.000553605		-2.09909	0.00117949		-2.09381	0.00117182		-2.09667	0.000675258		-2.09232	0.00197633		-2.096	0.00154655		-2.09305	0.00171105		-2.09565	0.00146377		-2.09744	0.00118476		-2.09727	0.000931723		-2.10009	0.000230418		-2.09638	0.00184776
-2.08998	0.00541898		-2.08555	0.00233859		-2.09385	0.00273069		-2.09229	0.00181938		-2.0921	0.00076808		-2.09221	0.00144717		-2.08912	0.00180901		-2.08855	0.000868829		-2.08794	0.00213631		-2.08819	0.00166387		-2.08618	0.00169339		-2.08908	0.00131145		-2.08994	0.000380331		-2.09102	0.000221997		-2.09509	0.000559046		-2.08857	0.00145422
-2.08248	0.00483311		-2.08149	0.00265536		-2.08948	0.00239927		-2.0851	0.00209996		-2.08804	0.000373547		-2.0844	0.00153989		-2.08475	0.0015232		-2.0823	0.00084396		-2.08294	0.00167282		-2.08257	0.00232863		-2.0818	0.00143346		-2.08502	0.0012225		-2.08213	0.000712128		-2.08289	0.000855578		-2.09071	0.000968416		-2.08232	0.00104908
-2.07842	0.00501957		-2.07493	0.0035497		-2.0826	0.00252776		-2.07729	0.00232872		-2.08241	0.000240497		-2.07878	0.00240738		-2.07694	0.00155682		-2.07823	0.000888769		-2.07482	0.00151577		-2.0785	0.00208936		-2.07649	0.00132478		-2.0794	0.0014583		-2.07775	0.00180572		-2.07695	0.00149049		-2.08384	0.00112399		-2.07826	0.000855808
-2.07435	0.00517058		-2.0668	0.004005		-2.07479	0.00364934		-2.07229	0.00149225		-2.0746	0.000825372		-2.07471	0.00254999		-2.06912	0.00133595		-2.07229	0.000874206		-2.06763	0.00222982		-2.07163	0.00183733		-2.06868	0.00166237		-2.07096	0.00140542		-2.074	0.00168439		-2.07289	0.00122765		-2.07571	0.000953542		-2.07233	0.00178122
-2.06717	0.00629346		-2.06118	0.00407546		-2.06885	0.00298532		-2.06791	0.00169094		-2.06741	0.00202723		-2.06846	0.00232386		-2.06475	0.00151311		-2.06417	0.00108099		-2.06357	0.00273343		-2.0635	0.00156636		-2.06149	0.00105489		-2.0644	0.00153348		-2.06713	0.00122717		-2.06664	0.00116438		-2.0704	0.00118632		-2.0642	0.00162822
-2.05967	0.00496009		-2.05774	0.00315456		-2.06479	0.00309834		-2.06073	0.000722745		-2.06303	0.00178149		-2.06034	0.0020928		-2.061	0.00126534		-2.05761	0.00113454		-2.05919	0.00280576		-2.05788	0.001151		-2.05743	0.00203778		-2.06096	0.00179879		-2.05963	0.000760662		-2.05852	0.00185634		-2.06603	0.000773883		-2.05795	0.00181077
-2.05467	0.00557914		-2.05211	0.00365046		-2.05854	0.00286682		-2.05292	0.000818906		-2.05804	0.00147971		-2.0544	0.00117478		-2.05412	0.000752983		-2.05417	0.00132229		-2.052	0.00302973		-2.05444	0.00195245		-2.05306	0.00185664		-2.05596	0.00144497		-2.05432	0.00148685		-2.05227	0.00174557		-2.05915	0.000222391		-2.0542	0.00117362
-2.05029	0.00479323		-2.0443	0.00374003		-2.0501	0.00288876		-2.04791	0.00139521		-2.05022	0.00173364		-2.05065	0.000969418		-2.04662	0.000404547		-2.04917	0.00142871		-2.04482	0.00268408		-2.0485	0.0017933		-2.04555	0.00198502		-2.04846	0.00127342		-2.04994	0.00197468		-2.04883	0.00178885		-2.05103	7.36582e-05		-2.04889	0.000878133
-2.04373	0.00539528		-2.03805	0.0036329		-2.04448	0.00272403		-2.04448	0.00116359		-2.04304	0.00135254		-2.0444	0.00152383		-2.04131	0.000774629		-2.04136	0.00102924		-2.03982	0.00236795		-2.041	0.00209795		-2.03868	0.00186955		-2.04158	0.00144541		-2.04338	0.000848884		-2.04321	0.00147895		-2.04572	0.000656077		-2.04108	0.00185498
-2.0356	0.00532044		-2.03368	0.00430486		-2.04104	0.00230779		-2.03792	0.00168809		-2.03897	0.000626846		-2.03596	0.00246113		-2.03693	0.00117813		-2.0348	0.00056615		-2.03513	0.00230305		-2.03507	0.00161105		-2.03368	0.00113572		-2.03721	0.0018001		-2.03557	0.00152155		-2.03571	0.00163701		-2.04228	0.000431325		-2.03451	0.00232119
-2.02967	0.00542388		-2.02836	0.00503017		-2.0351	0.0030198		-2.0301	0.00140948		-2.0346	0.000758847		-2.02971	0.00220844		-2.03069	0.00196032		-2.03011	0.000942538		-2.02825	0.00222329		-2.03069	0.00160576		-2.02931	0.00058371		-2.03221	0.000131123		-2.02932	0.00187535		-2.02914	0.00180661		-2.03603	0.0010527		-2.03045	0.00154089
-2.0256	0.00445559		-2.02055	0.00428159		-2.02729	0.0032141		-2.02479	0.0025408		-2.02741	0.00192293		-2.02628	0.0011206		-2.02256	0.00149693		-2.02511	0.00120467		-2.02013	0.00250359		-2.02506	0.00224873		-2.02243	0.00131731		-2.02471	0.00160822		-2.02525	0.000983372		-2.02477	0.00184946		-2.02853	0.00120119		-2.02514	0.000914248
-2.01967	0.00480042		-2.01336	0.00451122		-2.02135	0.00316043		-2.02041	0.00148896		-2.02022	0.0011538		-2.02096	0.000665765		-2.01631	0.0014114		-2.01792	0.00130548		-2.01482	0.00249796		-2.01725	0.00164693		-2.0143	0.0012795		-2.01721	0.0019817		-2.01932	0.000459028		-2.01946	0.00176932		-2.02259	0.00182375		-2.01764	0.000963714
-2.01154	0.00541555		-2.00868	0.00500163		-2.01729	0.00255107		-2.01417	0.00124263		-2.01522	0.00067994		-2.01346	0.00172084		-2.01225	0.0011382		-2.01042	0.00141213		-2.01075	0.00254393		-2.01006	0.00164627		-2.00868	0.00123625		-2.01221	0.00194652		-2.0115	0.000520262		-2.01164	0.0010778		-2.01822	0.00046721		-2.01013	0.00179895
-2.00529	0.0051544		-2.00399	0.0043277		-2.01167	0.00198009		-2.00604	0.000727575		-2.01053	0		-2.0069	0.00210501		-2.00662	0.00114954		-2.00542	0.00147665		-2.00419	0.0029734		-2.00569	0.00196257		-2.00462	0.00148984		-2.00783	0.00236414		-2.00494	0.000777898		-2.00446	0.00186012		-2.01259	0.00068299		-2.00545	0.000822977
-2.00123	0.00490191		-1.99649	0.00385308		-2.00385	0.00297553		-1.99979	0.00104284		-2.00366	0.000471761		-2.00253	0.00195019		-1.9985	0.00088538		-2.00074	0.000957101		-1.99607	0.00252049		-2.001	0.00196852		-1.99837	0.0012915		-2.00065	0.00232371		-2.00057	0.000751137		-1.99976	0.00072682		-2.00478	0.00116932		-2.00108	0.00147632
-1.99529	0.00497708		-1.98899	0.00380369		-1.99667	0.00276908		-1.99573	0.0019511		-1.99585	0.00146082		-1.99721	0.00197074		-1.99162	0.000889583		-1.99386	0.000546659		-1.99013	0.0024583		-1.99319	0.00135967		-1.99024	0.00103406		-1.99252	0.00120939		-1.99494	0.00152087		-1.99508	0.000987		-1.9979	0.00144412		-1.99389	0.00147041
-1.98717	0.00547193		-1.9843	0.00379776		-1.99229	0.00263608		-1.9901	0.00180511		-1.99022	0.00182451		-1.9894	0.00173476		-1.98756	0.00116068		-1.98604	0.0014706		-1.98638	0.00149549		-1.98569	0.00118204		-1.9843	0.00153671		-1.9872	0.0021397		-1.98682	0.00182749		-1.98758	0.00119057		-1.99353	0.00174466		-1.98608	0.00156344
-1.9806	0.00479519		-1.97962	0.00483216		-1.9876	0.00275517		-1.98229	0.00229623		-1.98616	0.00146796		-1.98221	0.00204848		-1.98194	0.000938549		-1.98073	0.00162183		-1.98013	0.00179517		-1.981	0.000421307		-1.98024	0.00141852		-1.98315	0.00187899		-1.98025	0.00119928		-1.98008	0.0013009		-1.98853	0.00106993		-1.98076	0.00111737
-1.97717	0.00437258		-1.97212	0.00402322		-1.97979	0.00260317		-1.97542	0.00158117		-1.97991	0.00204192		-1.97752	0.00236455		-1.97381	0.00135781		-1.97636	0.00121811		-1.97169	0.00189026		-1.97631	0.00114175		-1.97399	0.00173324		-1.97627	0.0013687		-1.9765	0.000930303		-1.97508	0.00150803		-1.98071	0.00154068		-1.9767	0.00137827
-1.97217	0.00415048		-1.9643	0.00382169		-1.97229	0.00307719		-1.97104	0.0013063		-1.97179	0.00139765		-1.97284	0.00159043		-1.96725	0.00214231		-1.96949	0.0011137		-1.96575	0.00247791		-1.96881	0.00145278		-1.96556	0.00159082		-1.96815	0.00145852		-1.97182	0.000403464		-1.9707	0.00162546		-1.97353	0.00164952		-1.96951	0.00192283
-1.96435	0.00495175		-1.95993	0.0037341		-1.9676	0.00329147		-1.96604	0.00124395		-1.96553	0.0012795		-1.96534	0.000643709		-1.9635	0.00135402		-1.96136	0.000204101		-1.96232	0.00235172		-1.96131	0.00110411		-1.95993	0.00106168		-1.96284	0.00140061		-1.964	0.000502799		-1.96352	0.00152113		-1.96884	0.00120261		-1.96139	0.00169608
-1.95779	0.00509981		-1.95618	0.00429169		-1.96323	0.002972		-1.95791	0.0010659		-1.96178	0.00162493		-1.95784	0.00176838		-1.95881	0.00151752		-1.95636	0.00139622		-1.95669	0.00193037		-1.95694	0.000710102		-1.95649	0.00177309		-1.9594	0.00135515		-1.95713	0.000753405		-1.95539	0.000762561		-1.96415	0.000920491		-1.95638	0.00117055
-1.9531	0.00470629		-1.9493	0.00394528		-1.95542	0.0026112		-1.95073	0.00120948		-1.95553	0.00192776		-1.95284	0.00191635		-1.95131	0.00180754		-1.95261	0.00159203		-1.94919	0.00228908		-1.95287	0.00115716		-1.95087	0.00183717		-1.95315	0.00138597		-1.95275	0.000987681		-1.95071	0.000939049		-1.95634	0.000834084		-1.95295	0.00158532
-1.9481	0.00504131		-1.9418	0.00342062		-1.9476	0.0020416		-1.94698	0.00120684		-1.9471	0.00248703		-1.94846	0.00129556		-1.94412	0.00155409		-1.94636	0.000878238		-1.94263	0.00203537		-1.946	0.00112062		-1.94306	0.00141942		-1.94565	0.00191374		-1.94775	0.00121311		-1.94727	0.00162546		-1.94884	0.000679685		-1.94639	0.00146582
-1.94092	0.00574517		-1.93649	0.00334072		-1.94323	0.0026396		-1.94229	0.000961392		-1.94116	0.00111456		-1.94128	0.00163069		-1.93975	0.000829059		-1.93886	0.000815955		-1.93826	0.00253672		-1.9385	0.00198283		-1.9368	0.00213446		-1.9397	0.00160429		-1.94057	0.00142811		-1.94071	0.00204704		-1.94478	0.000476181		-1.93889	0.000720104
-1.93342	0.0055958		-1.93243	0.00381533		-1.93948	0.00230309		-1.93479	0.00124746		-1.93772	0.000778573		-1.93315	0.00162555		-1.93475	0.0011651		-1.93292	0.000627985		-1.93294	0.00265637		-1.9335	0.00177547		-1.93243	0.0017749		-1.93564	0.00135297		-1.93275	0.00158596		-1.93289	0.00186389		-1.94072	0.000294869		-1.93326	0.00114582
-1.92842	0.00444203		-1.92586	0.00414242		-1.9326	0.00314535		-1.92792	0.00235353		-1.9321	0.000777104		-1.92846	0.00191228		-1.92756	0.00116951		-1.92886	0.000462419		-1.92513	0.00233753		-1.92881	0.00155404		-1.92681	0.00198208		-1.92971	0.0013864		-1.92775	0.00191345		-1.92758	0.00227037		-1.93353	0.0011934		-1.92889	0.000944015
-1.92373	0.0054314		-1.91774	0.00468947		-1.9251	0.00300824		-1.92323	0.00172739		-1.9246	0.00118906		-1.92503	0.00111204		-1.91975	0.00146457		-1.92292	0.00115045		-1.91794	0.00287854		-1.92256	0.00129782		-1.91931	0.00163407		-1.9219	0.00189451		-1.92369	0.000963187		-1.9232	0.00225438		-1.92634	0.00091813		-1.92295	0.00170746
-1.91685	0.00506517		-1.9118	0.00407963		-1.91979	0.00214306		-1.91854	0.0018286		-1.91835	0.000831038		-1.91846	0.00106685		-1.91475	0.00122919		-1.9148	0.00177574		-1.91357	0.00214262		-1.91444	0.000843273		-1.91212	0.00166328		-1.91502	0.00172754		-1.9165	0.000116118		-1.91696	0.00212451		-1.92134	0.000503095		-1.91483	0.00185717
-1.90904	0.00553665		-1.90774	0.00542553		-1.91542	0.00259906		-1.91167	0.00202224		-1.91397	0.00134162		-1.91065	0.00143817		-1.91037	0.00131452		-1.90823	0.00121071		-1.90857	0.00237674		-1.9085	0.000766452		-1.90743	0.00212314		-1.91064	0.00180163		-1.90869	2.81223e-05		-1.90883	0.00120767		-1.91665	0.000910576		-1.90827	0.00162385
-1.90373	0.004645		-1.9018	0.00482843		-1.90885	0.00264058		-1.90354	0.00205385		-1.90866	0.00150258		-1.90534	0.00165531		-1.9035	0.00119473		-1.90417	0.0014231		-1.90107	0.00271743		-1.90444	0.000953332		-1.90243	0.00251937		-1.90533	0.00144126		-1.90338	0.000896737		-1.90258	0.000921289		-1.91009	0.00192739		-1.90389	0.00180004
-1.89967	0.00457277		-1.89368	0.00476301		-1.90104	0.00184553		-1.89823	0.00177437		-1.90085	0.00137184		-1.90096	0.00160927		-1.89537	0.0014322		-1.89886	0.000897058		-1.89357	0.00254866		-1.8985	0.00139335		-1.89493	0.00318233		-1.89752	0.00168362		-1.89932	0.00148844		-1.8982	0.00165876		-1.90197	0.000772703		-1.89858	0.00152076
-1.89279	0.00427142		-1.88711	0.00438082		-1.8951	0.00171841		-1.89417	0.00177898		-1.89366	0.00183563		-1.89471	0.00142918		-1.88975	0.00181868		-1.89105	0.00153266		-1.88857	0.00144817		-1.89037	0.00132115		-1.88743	0.00181498		-1.89033	0.00202956		-1.89244	0.00142562		-1.89289	0.00171826		-1.89634	0		-1.89076	0.00201804
-1.88467	0.00527598		-1.88305	0.00489407		-1.89104	0.00245548		-1.8876	0.00147293		-1.88897	0.00115002		-1.8869	0.00125594		-1.88569	0.00136621		-1.88386	0.00161399		-1.88419	0.00224852		-1.88381	0.00127625		-1.88274	0.00143029		-1.88564	0.00109072		-1.88401	0.000947539		-1.88508	0.00160748		-1.89196	0.00102224		-1.88358	0.0011815
-1.87967	0.00589928		-1.87743	0.00525145		-1.8851	0.00227841		-1.87948	0.000523617		-1.88429	0.000639228		-1.88065	0.00144481		-1.87912	0.00098058		-1.87949	0.00129159		-1.87701	0.00276677		-1.87975	0.00112172		-1.87837	0.00179528		-1.88096	0.000926382		-1.87869	0.000728231		-1.87821	0.0016157		-1.88603	0.00174702		-1.8792	0.00155796
-1.87592	0.00591988		-1.8693	0.00496322		-1.87698	0.00311225		-1.87385	0.000929337		-1.87679	0.000553186		-1.87627	0.00244614		-1.871	0.000691618		-1.8748	0.000948139		-1.86919	0.00217935		-1.87412	0.0017451		-1.87055	0.000702127		-1.87346	0.00131319		-1.87525	0.000538859		-1.87383	0.00119035		-1.8779	0.00113084		-1.8742	0.000967654
-1.86967	0.00553501		-1.86274	0.00433977		-1.87073	0.00313967		-1.86979	0.00103296		-1.86929	0.000932819		-1.87065	0.00239003		-1.86537	0.000959565		-1.86667	0.000671225		-1.8645	0.00248129		-1.86569	0.00209575		-1.86274	0.00129104		-1.86596	0.00121966		-1.86932	0.000509149		-1.86852	0.00169118		-1.87165	0.00125809		-1.86608	0.00113728
-1.86217	0.0043242		-1.85899	0.00428555		-1.86667	0.00217969		-1.86354	0.0018747		-1.86428	0.00137163		-1.86284	0.00256177		-1.86194	0.000946745		-1.85917	0.000668985		-1.86075	0.00180734		-1.85912	0.00152454		-1.85805	0.00170313		-1.86158	0.00136455		-1.8615	0.00129317		-1.8607	0.00117659		-1.86759	0.000897118		-1.85889	0.00180967
-1.85623	0.00460219		-1.8543	0.00411651		-1.86104	0.00233463		-1.85542	0.00202795		-1.85991	0.0012944		-1.85596	0.00235341		-1.856	0.000455194		-1.85511	0.000245772		-1.85419	0.00112821		-1.85569	0.000863084		-1.8543	0.0022805		-1.85752	0.00121551		-1.85525	0.000628895		-1.85352	0.0014068		-1.86165	0.00116437		-1.85482	0.00212026
-1.85185	0.00442896		-1.8468	0.00471472		-1.8526	0.00335122		-1.84948	0.00133747		-1.85241	0.00107279		-1.8519	0.00145209		-1.8485	0.000784927		-1.85105	0.000601997		-1.84638	0.00209192		-1.85069	0.00124301		-1.84774	0.00164358		-1.85033	0.000959163		-1.85119	0.000576506		-1.84976	0.00198443		-1.85353	0.00125195		-1.85045	0.00178954
-1.84592	0.00490272		-1.83993	0.00513554		-1.84604	0.00289875		-1.84604	0.00189929		-1.8446	0.00117772		-1.84659	0.00133346		-1.84256	0.00123445		-1.84386	0.000628657		-1.84107	0.00211739		-1.84319	0.00173255		-1.83993	0.00215461		-1.84315	0.00161631		-1.84557	0.000888799		-1.84508	0.001756		-1.84697	0.000315644		-1.84326	0.00135594
-1.8381	0.00462686		-1.83524	0.00532982		-1.84229	0.00294047		-1.84041	0.0030282		-1.83991	0.000465885		-1.83846	0.00110133		-1.83818	0.00159864		-1.83667	0.00133819		-1.83669	0.00227782		-1.83663	0.00186066		-1.83462	0.00212925		-1.83814	0.00146005		-1.83744	0.00124963		-1.83758	0.00234318		-1.84353	1.10958e-05		-1.83576	0.00084946
-1.83154	0.00382102		-1.83055	0.00550456		-1.83729	0.00201437		-1.8326	0.00246221		-1.83616	0.000934918		-1.83159	0.00103923		-1.83256	0.000962087		-1.83167	0.00119974		-1.83044	0.00188124		-1.83194	0.00144552		-1.83024	0.00144501		-1.83377	0.00167925		-1.83057	0.000768146		-1.83039	0.00269904		-1.83853	0.00140635		-1.83107	0.00111211
-1.82717	0.00413741		-1.82337	0.00539348		-1.82979	0.00166023		-1.82635	0.00242993		-1.8296	0.00149608		-1.82753	0.00123624		-1.82475	0.000411062		-1.8273	0.00121251		-1.82232	0.00148512		-1.82694	0.00139335		-1.82368	0.00052235		-1.8269	0.00125769		-1.8265	0.00169232		-1.82571	0.00162213		-1.83072	0.000990844		-1.82639	0.00113378
-1.82185	0.00494619		-1.81555	0.00627707		-1.82323	0.00161714		-1.82198	0.0018365		-1.8221	0.00125243		-1.82315	0.00126772		-1.81756	0.00177265		-1.82042	0.000987794		-1.81607	0.00270819		-1.81975	0.00173013		-1.81587	0.00146607		-1.81908	0.00187593		-1.82119	0.00176649		-1.82102	0.00196246		-1.82415	0.00106002		-1.81951	0.00265979
-1.81435	0.00606107		-1.81024	0.00622504		-1.81854	0.00298924		-1.81666	0.00193683		-1.81678	0.00157498		-1.81565	0.00110004		-1.81319	0.0015274		-1.8123	0.00179165		-1.812	0.00392292		-1.81194	0.00233436		-1.80962	0.00154713		-1.81315	0.00188948		-1.81338	0.00168779		-1.81414	0.0017853		-1.81978	0.00123377		-1.81139	0.00272348
-1.80717	0.00527255		-1.80618	0.00560708		-1.81385	0.00275184		-1.80916	0.00171202		-1.81241	0.000846777		-1.80878	0.00172962		-1.80819	0.00232809		-1.80667	0.00169419		-1.80638	0.00247408		-1.80694	0.00208276		-1.80524	0.00127248		-1.80908	0.0011329		-1.80619	0.00155194		-1.80633	0.00221243		-1.81478	0.00117948		-1.80577	0.00223758
-1.80279	0.00541359		-1.7993	0.00406778		-1.80667	0.0020085		-1.80198	0.00169841		-1.80616	0.000905957		-1.80409	0.00174311		-1.80037	0.00151311		-1.80261	0.00180733		-1.79825	0.00189589		-1.80256	0.00114175		-1.79962	0.000809224		-1.80283	0.00107084		-1.80182	0.00143582		-1.80071	0.00276031		-1.80728	0.00106096		-1.8017	0.000811376
-1.79779	0.00537028		-1.79118	0.00424823		-1.79885	0.00191487		-1.79729	0.00191488		-1.79804	0.00111288		-1.7994	0.00177288		-1.79318	1.53412e-05		-1.79636	0.00100796		-1.79138	0.00246033		-1.79569	0.00046533		-1.7918	0.00154237		-1.79471	0.00104133		-1.79713	0.00101512		-1.79664	0.00192849		-1.79978	0.00109165		-1.79545	9.84945e-05
-1.78998	0.00500454		-1.78586	0.00419883		-1.79385	0.00162125		-1.7926	0.00293511		-1.79178	0.000592429		-1.79221	0.00128035		-1.7885	0.00096713		-1.78823	0.0004203		-1.78732	0.00232964		-1.78756	0		-1.78493	0.000994661		-1.78815	0.00168624		-1.78932	0.00190823		-1.79008	0.0013584		-1.79478	0.0012614		-1.78732	0.000306427
-1.78248	0.00461068		-1.7818	0.00455556		-1.78948	0.00231876		-1.7851	0.00180994		-1.78772	0.00168663		-1.7844	0.00155574		-1.78381	0.000728185		-1.7823	0.000101714		-1.78201	0.00229539		-1.78225	0.000880694		-1.78087	0.00152154		-1.78439	0.000974898		-1.7815	0.00120155		-1.78195	0.000971016		-1.79009	0.000815906		-1.78139	0.00119682
-1.77842	0.00527876		-1.77493	0.00468684		-1.7826	0.00199224		-1.7776	0.00168655		-1.7821	0.00121886		-1.77909	0.00166816		-1.776	0.00106254		-1.77824	0.00053232		-1.77388	0.00170842		-1.77819	0.00107902		-1.77524	0.00150207		-1.77846	0.000834159		-1.77744	0.0010158		-1.77602	0.00166165		-1.78322	0.00123023		-1.77732	0.00184929
-1.77435	0.00560136		-1.76649	0.00440343		-1.77448	0.00189959		-1.7726	0.00182772		-1.77397	0.0020159		-1.77502	0.00235855		-1.7685	0.00119052		-1.7723	0.000111348		-1.767	0.00303401		-1.77131	0.00128901		-1.76712	0.00217476		-1.77033	0.00100965		-1.77338	0.000949807		-1.77226	0.00181727		-1.7754	0.000974082		-1.77107	0.00102609
-1.76717	0.00564189		-1.76118	0.00529141		-1.76917	0.00214757		-1.76823	0.00152057		-1.7671	0.00217161		-1.76846	0.00203755		-1.76444	0.00139269		-1.76386	0.000941642		-1.76325	0.00281567		-1.76287	0.00138564		-1.76055	0.00194744		-1.76408	0.00126599		-1.76619	0.000807607		-1.7657	0.00140302		-1.77009	0.000290147		-1.76264	0.00178209
-1.75967	0.00616125		-1.75774	0.00507891		-1.7651	0.00277867		-1.76073	0.00182618		-1.76304	0.00166271		-1.76034	0.00216754		-1.76006	0.00163395		-1.75792	0.0020027		-1.75857	0.00270887		-1.75787	0.00152234		-1.7568	0.00102093		-1.76033	0.000908243		-1.75869	0.00110833		-1.75726	0.0018357		-1.76571	0.000515607		-1.75701	0.00152907
-1.75498	0.00560643		-1.7518	0.00499022		-1.75823	0.00241376		-1.75292	0.00240622		-1.75772	0.000766821		-1.75471	0.00230138		-1.75319	0.00125105		-1.75417	0.00188216		-1.75107	0.00205858		-1.75444	0.00169227		-1.75212	0.00181973		-1.75533	0.000383534		-1.75369	0.00211529		-1.75164	0.00215493		-1.75884	0.000823933		-1.75357	0.00156431
-1.75029	0.00497872		-1.74399	0.00497617		-1.7501	0.00263921		-1.74823	0.00100245		-1.7496	0.00110847		-1.75065	0.00177523		-1.746	0.00148054		-1.74886	0.00186491		-1.74419	0.00221653		-1.74819	0.001628		-1.74462	0.00155211		-1.74752	0.00124567		-1.74932	0.000987227		-1.7482	0.00224084		-1.75071	0.000960861		-1.74795	0.00145728
-1.74342	0.00459565		-1.73805	0.00498495		-1.74479	0.00242101		-1.74448	0.00157129		-1.74241	0.0014264		-1.7444	0.0022851		-1.74068	0.00100979		-1.74136	0.0017455		-1.73919	0.00192586		-1.74069	0.00229826		-1.73743	0.00114999		-1.74096	0.00109072		-1.74244	0.00157076		-1.74258	0.00172803		-1.74572	0.00115067		-1.74045	0.00139052
-1.73529	0.00474584		-1.73368	0.00533663		-1.74135	0.00251033		-1.73792	0.00158183		-1.73866	0.00165578		-1.73596	0.00184076		-1.73631	0.00120124		-1.7348	0.00204549		-1.73451	0.00148783		-1.73475	0.00231697		-1.73274	0.0010447		-1.73658	0.0011235		-1.73432	0.00182885		-1.73477	0.00164678		-1.74197	0.000648995		-1.73389	0.000990417
-1.72998	0.00408266		-1.72805	0.00532829		-1.7351	0.00273304		-1.73042	0.00134735		-1.73429	0.00125705		-1.73034	0.00156002		-1.72975	0.0021337		-1.73011	0.00122841		-1.72763	0.00273095		-1.73038	0.0016062		-1.72806	0.00178305		-1.73158	0.000721175		-1.72869	0.00139432		-1.72852	0.00161126		-1.73571	0.00136268		-1.72951	0.000775699
-1.72592	0.0045628		-1.72024	0.00404231		-1.72729	0.00316298		-1.7251	0.00130608		-1.72679	0.00120941		-1.72659	0.00119427		-1.72194	0.00184158		-1.72511	0.00108548		-1.71982	0.00353536		-1.72444	0.00109509		-1.72087	0.0025239		-1.72408	0.00197143		-1.72432	0.00149252		-1.72415	0.00105227		-1.7279	0.00190472		-1.7242	0.000970718
-1.71935	0.00425818		-1.71337	0.00595108		-1.72135	0.00266761		-1.72073	0.0016141		-1.7196	0.00190236		-1.72096	0.00177802		-1.716	0.00157006		-1.71761	0.0015293		-1.71419	0.00215186		-1.71662	0.00127581		-1.71337	0.00171264		-1.71658	0.0022564		-1.71838	0.0007686		-1.71883	0.000979008		-1.72228	0.00120143		-1.71639	0.00243544
-1.71154	0.00565627		-1.70899	0.00509844		-1.71729	0.00296593		-1.71417	0.002579		-1.71491	0.00234705		-1.71315	0.0022245		-1.71194	0.000541988		-1.71011	0.00233428		-1.71013	0.00236457		-1.71006	0.0021521		-1.70806	0.000945755		-1.71158	0.00156866		-1.71025	0.000372393		-1.71101	0.00103606		-1.7179	0.000693142		-1.7092	0.00163501
-1.7056	0.00565333		-1.70399	0.00434811		-1.71135	0.00271012		-1.70635	0.00170609		-1.71022	0.00170405		-1.7069	0.00234699		-1.70569	0.000662827		-1.70542	0.0016467		-1.70357	0.00286479		-1.70569	0.00140832		-1.70368	0.00130169		-1.70689	0.001384		-1.70401	0.00132991		-1.70383	0.00226593		-1.71196	0.000723597		-1.70452	0.00146341
-1.70154	0.00528105		-1.69618	0.00417008		-1.70354	0.00238242		-1.7001	0.00153221		-1.70335	0.00211285		-1.70253	0.00195254		-1.69756	0.00066745		-1.70104	0.00126224		-1.69544	0.00236186		-1.70037	0.000596961		-1.69712	0.00153173		-1.70002	0.0021467		-1.69994	0.00109541		-1.69946	0.00275521		-1.70415	0.0003291		-1.69982	0.000932415
-1.69529	0.00501303		-1.68899	0.00479989		-1.69698	0.00278102		-1.69573	0.00194935		-1.69554	0.00184045		-1.6969	0.0012266		-1.691	0.00101		-1.69355	0.00157254		-1.68951	0.00221563		-1.69287	0.00110059		-1.68899	0.00204004		-1.69221	0.0020053		-1.694	0.0015846		-1.69445	0.0024695		-1.69759	0.000622553		-1.69232	0.00144962
-1.68685	0.00392839		-1.6843	0.0053105		-1.6926	0.00233463		-1.6901	0.00223278		-1.69022	0.00164424		-1.6894	0.00164482		-1.68725	0.00150681		-1.68573	0.00105165		-1.68576	0.00332874		-1.68569	0.00117697		-1.68337	0.00153852		-1.6869	0.00180097		-1.68588	0.000676976		-1.68695	0.00274611		-1.69322	0.00104774		-1.68482	0.00151244
-1.68092	0.00487658		-1.67961	0.00478782		-1.68729	0.00168648		-1.68229	0.00151509		-1.68585	0.00192943		-1.68221	0.00214891		-1.68131	0.000619535		-1.68074	0.000737989		-1.67919	0.00204821		-1.681	0.00161721		-1.6793	0.00150162		-1.68252	0.00143863		-1.67932	0.00102488		-1.67945	0.0021234		-1.6879	0.00137708		-1.67983	0.00160765
-1.67717	0.00508886		-1.6718	0.0057377		-1.67979	0.00200321		-1.67542	0.00178118		-1.67929	0.00177918		-1.67784	0.0016339		-1.67319	0.000103186		-1.67636	0.00173878		-1.67075	0.00108179		-1.676	0.00188597		-1.67274	0.00201287		-1.67564	0.00134685		-1.67557	0.000479893		-1.67445	0.00200286		-1.68009	0.00108646		-1.67545	0.00220562
-1.67185	0.0047983		-1.6643	0.00466137		-1.6726	0.00209194		-1.67135	0.00174254		-1.67147	0.00231893		-1.67284	0.000485458		-1.66662	0.000606926		-1.66917	0.00125552		-1.66513	0.00165254		-1.66819	0.00106009		-1.66462	0.00187068		-1.66752	0.00202585		-1.67057	0.000582176		-1.67008	0.00241178		-1.6729	0.000959445		-1.66826	0.0018309
-1.66435	0.00532207		-1.66024	0.00402717		-1.66792	0.00241474		-1.66573	0.0014703		-1.66554	0.00195084		-1.66534	0.00151184		-1.66319	0.00144712		-1.66136	0.00115134		-1.66169	0.00253649		-1.66069	0.00107		-1.65899	0.00130916		-1.66252	0.00209927		-1.66275	0.000671759		-1.66258	0.00255852		-1.66853	0.00083975		-1.66045	0.00183594
-1.65779	0.00525507		-1.65618	0.00316597		-1.66292	0.00243883		-1.6576	0.00186768		-1.66147	0.00126188		-1.65784	0.00228874		-1.65818	0.00111928		-1.65636	0.00193705		-1.65575	0.00323252		-1.65663	0.00186		-1.65524	0.0018623		-1.65877	0.00153108		-1.65619	0.00086045		-1.65476	0.00177465		-1.66353	0.00131947		-1.65576	0.0015781
-1.6531	0.00550478		-1.64899	0.00390204		-1.65542	0.00186903		-1.65104	0.00208964		-1.65491	0.0007536		-1.65315	0.00163754		-1.65037	0.00123108		-1.65292	0.0021994		-1.64826	0.00289521		-1.65257	0.00165045		-1.64962	0.00153467		-1.65252	0.00139318		-1.6515	0.000831421		-1.65008	0.00204904		-1.65572	0.00200459		-1.65201	0.00102018
-1.6481	0.00620194		-1.64149	0.00505981		-1.6476	0.00242062		-1.64729	0.00205714		-1.64647	0.000965137		-1.64846	0.0010388		-1.64381	0.00168355		-1.64636	0.0019151		-1.64232	0.00197002		-1.64538	0.00163988		-1.64181	0.00170811		-1.64502	0.00116546		-1.6465	0.000879048		-1.64633	0.00196667		-1.64822	0.00149772		-1.64545	0.00112984
-1.6406	0.00566608		-1.63649	0.00489187		-1.64354	0.0023076		-1.64229	0.00225144		-1.64085	0.00212754		-1.64128	0.00059724		-1.63912	0.00121217		-1.63854	0.0012954		-1.63794	0.00227556		-1.63787	0.00127867		-1.63587	0.000929		-1.63908	0.00133767		-1.63932	0.000933024		-1.63976	0.00235073		-1.64447	0.000271024		-1.63764	0.00142708
-1.6331	0.00503706		-1.63212	0.0051575		-1.63948	0.00138816		-1.6351	0.00257571		-1.63772	0.00170237		-1.63346	0.00116343		-1.63412	0.000955992		-1.63323	0.00104448		-1.63232	0.00197273		-1.63287	0.00149526		-1.63118	0.000896395		-1.63502	0.00141307		-1.63182	0.00182999		-1.63226	0.00171981		-1.64009	0.000203976		-1.63233	0.00131983
-1.62842	0.00448991		-1.62555	0.00405724		-1.63229	0.00152194		-1.62823	0.00203321		-1.63178	0.00183794		-1.62878	0.0019776		-1.62693	0.00148096		-1.62886	0.000218887		-1.62482	0.00171653		-1.6285	0.0011838		-1.62556	0.00187634		-1.62908	0.00123474		-1.62682	0.00151747		-1.62695	0.00165388		-1.6329	0.000546298		-1.62795	0.00160765
-1.62373	0.00496581		-1.61743	0.00416942		-1.6251	0.00290305		-1.62354	0.00141256		-1.62397	0.00178904		-1.62503	0.00219666		-1.61943	0.00202673		-1.62261	0.000920134		-1.61763	0.00252951		-1.62194	0.00129165		-1.61806	0.00184532		-1.62096	0.00210539		-1.62213	0.00126845		-1.62258	0.00244463		-1.62571	0.000370888		-1.62139	0.00151638
-1.61654	0.00582868		-1.6118	0.00426074		-1.61979	0.00246684		-1.61885	0.00156404		-1.61803	0.00119598		-1.61846	0.00234934		-1.61444	0.000961877		-1.61479	0.00115426		-1.61294	0.00219174		-1.61382	0.00175434		-1.61087	0.0015863		-1.61439	0.00157216		-1.61525	0.0011038		-1.61633	0.00176443		-1.62072	0.00123637		-1.61326	0.00216075
-1.60873	0.00529282		-1.60743	0.00406712		-1.61542	0.00220417		-1.61167	0.00095239		-1.61366	0.0010409		-1.61065	0.0015915		-1.60975	0.000732178		-1.60855	0.00133237		-1.60794	0.00156624		-1.60819	0.00134052		-1.60618	0.00153445		-1.61034	0.000901687		-1.60744	0.00124554		-1.6082	0.00149471		-1.61634	0.00150787		-1.60701	0.00198696
-1.60373	0.00444595		-1.60149	0.0052093		-1.60885	0.00130766		-1.60385	0.00134011		-1.60803	0.00162934		-1.60534	0.00149257		-1.60287	0.00152824		-1.60417	0.00110317		-1.60044	0.00252455		-1.60413	0.00193176		-1.60149	0.00155347		-1.60502	0.00155293		-1.60213	0.00146077		-1.60195	0.00224972		-1.60946	0.00112659		-1.60295	0.00226319
-1.59935	0.00496041		-1.59337	0.00422628		-1.60104	0.0015525		-1.59854	0.00203278		-1.60053	0.00212481		-1.60096	0.00147008		-1.59506	0.00191661		-1.59886	0.00203586		-1.59294	0.00227872		-1.59788	0.00108518		-1.59368	0.00183287		-1.59689	0.00166635		-1.59775	0.0011825		-1.59758	0.00207212		-1.60134	0.00172011		-1.59732	0.000931977
-1.59248	0.0050016		-1.58711	0.00492897		-1.5951	0.0022361		-1.59416	0.00278121		-1.59335	0.00226752		-1.59471	0.00169022		-1.58975	0.000883069		-1.59105	0.00215258		-1.58794	0.0017305		-1.58975	0.000890159		-1.58618	0.00181951		-1.59002	0.00167269		-1.59088	0.000855234		-1.59195	0.00214671		-1.59572	0.00183957		-1.58951	0.000734988
-1.58467	0.00564875		-1.58305	0.00454941		-1.59104	0.00189685		-1.5876	0.0014097		-1.58897	0.00188998		-1.58659	0.00154546		-1.58537	0.00100265		-1.58417	0.00120556		-1.58357	0.00201486		-1.5835	0.00211446		-1.58149	0.00184758		-1.58565	0.00139077		-1.58276	0.0017751		-1.58414	0.00206147		-1.59165	0.00189599		-1.58264	0.00109701
-1.57967	0.00537093		-1.57712	0.0044739		-1.5851	0.00201907		-1.57948	0.00151904		-1.58397	0.00183773		-1.58034	0.00160649		-1.5785	0.000453303		-1.57979	0.0015461		-1.57607	0.00217845		-1.57944	0.00171846		-1.5768	0.00169792		-1.58064	0.00182304		-1.57775	0.00157144		-1.57726	0.0020739		-1.5854	0.00146514		-1.57826	0.001512
-1.57592	0.00464206		-1.56868	0.00455512		-1.57698	0.00148336		-1.57385	0.00147096		-1.57616	0.00120794		-1.57627	0.00138614		-1.57037	4.85456e-05		-1.57448	0.00132229		-1.56826	0.00248151		-1.5735	0.000638563		-1.5693	0.00212789		-1.57283	0.00207021		-1.574	0.00139568		-1.57321	0.000999654		-1.57728	0.00188348		-1.57295	0.00159058
-1.56935	0.00479078		-1.56243	0.00524377		-1.57073	0.00120071		-1.56979	0.00166833		-1.56866	0.00131056		-1.57065	0.00147907		-1.56506	0.00165034		-1.56667	0.00112267		-1.56388	0.00196461		-1.56538	0.00065133		-1.56149	0.00141829		-1.56533	0.00168777		-1.56776	0.00137255		-1.56758	0.00139192		-1.57134	0.00173899		-1.56482	0.00196901
-1.56185	0.00528465		-1.55899	0.00490351		-1.56667	0.00156856		-1.56323	0.00201587		-1.56397	0.000909525		-1.56253	0.00203156		-1.56162	0.000902823		-1.55949	0.00101087		-1.56013	0.00209733		-1.55913	0.00158001		-1.55712	0.00061405		-1.56127	0.000856668		-1.55994	0.000732993		-1.55946	0.00252877		-1.56728	0.00145876		-1.55795	0.00152448
-1.55623	0.00686757		-1.55399	0.00408907		-1.56073	0.00148825		-1.5551	0.00118225		-1.5596	0.00128433		-1.55596	0.00213863		-1.55537	0.00095347		-1.55542	0.00076353		-1.55326	0.00229449		-1.55538	0.00201496		-1.55337	0.00160418		-1.55689	0.000765757		-1.55432	0.0013061		-1.55289	0.00302227		-1.56103	0.00117168		-1.5542	0.00139862
-1.55185	0.00558469		-1.54618	0.00351129		-1.5526	0.0016524		-1.54948	0.00144571		-1.5521	0.00181317		-1.5519	0.001802		-1.54787	0.001664		-1.55105	0.000979281		-1.54575	0.00225957		-1.55038	0.00174576		-1.54649	0.00170494		-1.5497	0.000799193		-1.54994	0.00189553		-1.54914	0.00221775		-1.5529	0.00109165		-1.54951	0.00160765
-1.54592	0.00462997		-1.53961	0.00409873		-1.54604	0.00223924		-1.54604	0.00195857		-1.54429	0.0013242		-1.54628	0.00126258		-1.54194	0.00173398		-1.54355	0.00203205		-1.54044	0.00263068		-1.54257	0.00160774		-1.53899	0.00187408		-1.54252	0.00131188		-1.54401	0.00167395		-1.54446	0.00165388		-1.54665	0.00181879		-1.54201	0.00177772
-1.53779	0.0055909		-1.53524	0.004547		-1.5426	0.00207901		-1.54041	0.00161169		-1.5396	0.0012581		-1.53815	0.00155231		-1.53787	0.000816659		-1.53636	0.00146298		-1.53607	0.00292247		-1.536	0.00145058		-1.53368	0.00241771		-1.53752	0.000670474		-1.53619	0.00132628		-1.53695	0.00192183		-1.5429	0.00137755		-1.53482	0.00132771
-1.53123	0.0055476		-1.53024	0.00505586		-1.5376	0.00172487		-1.5326	0.000988615		-1.53585	0.00152147		-1.53159	0.00276778		-1.53194	0.000810775		-1.53167	0.000913189		-1.52951	0.00314825		-1.53163	0.0010854		-1.52899	0.00193974		-1.53315	0.00114208		-1.52963	0.00106207		-1.52976	0.00197444		-1.53759	0.000632705		-1.53014	0.00126642
-1.52717	0.00475123		-1.52274	0.00521084		-1.52979	0.00198577		-1.52635	0.00165581		-1.52897	0.000809213		-1.52784	0.00236648		-1.52381	0.00131977		-1.52698	0.00100796		-1.52138	0.00257367		-1.52663	0.00205172		-1.52274	0.00165943		-1.52627	0.00065911		-1.52525	0.000994711		-1.52508	0.00175422		-1.53009	0.000300063		-1.52545	0.00191386
-1.52185	0.00491302		-1.51524	0.00378064		-1.52323	0.00188588		-1.52198	0.00162837		-1.52147	0.00120689		-1.52284	0.0018686		-1.51725	0.00140993		-1.52011	0.0012786		-1.51513	0.00278322		-1.51913	0.00203675		-1.51462	0.0023602		-1.51845	0.000740625		-1.51994	0.00115551		-1.52039	0.00324738		-1.52353	0.000708251		-1.51826	0.00180529
-1.51373	0.00494701		-1.51024	0.00378811		-1.51854	0.0018136		-1.51666	0.00225649		-1.51616	0.00151434		-1.51534	0.00149128		-1.51319	0.00154526		-1.5123	0.00112961		-1.51107	0.00198895		-1.51163	0.00094827		-1.50868	0.00195513		-1.51252	0.00127429		-1.51213	0.00118635		-1.51321	0.00319077		-1.51915	0.000897827		-1.51045	0.00157307
-1.50685	0.00581153		-1.50586	0.00523652		-1.51354	0.00128611		-1.50885	0.00156602		-1.5121	0.00149062		-1.50846	0.00145402		-1.50787	0.000865205		-1.50667	0.00150286		-1.50544	0.00304753		-1.50662	0.00120251		-1.50462	0.00168592		-1.50846	0.00130467		-1.50526	0.00102034		-1.5054	0.00235184		-1.51384	0.00107678		-1.50514	0.00169454
-1.50248	0.0054466		-1.49868	0.00559171		-1.50604	0.00192584		-1.50167	0.00138511		-1.50554	0.00123187		-1.50409	0.000707737		-1.50006	0.00115543		-1.50261	0.00113521		-1.49732	0.00245222		-1.50225	0.00132467		-1.49868	0.00139339		-1.5022	0.000922011		-1.50088	0.000965682		-1.50008	0.00225638		-1.50634	0.00146868		-1.50076	0.00201695
-1.49748	0.00616517		-1.49087	0.00551927		-1.49854	0.00216422		-1.49729	0.00127644		-1.49772	0.00100543		-1.49909	0.00150006		-1.49287	0.000778202		-1.49605	0.00117823		-1.49076	0.00194028		-1.49507	0.00143781		-1.49056	0.00126818		-1.49409	0.00120196		-1.49588	0.00186809		-1.49571	0.00191562		-1.49884	0.00108221		-1.4942	0.00172847
-1.48935	0.00583391		-1.48555	0.00350755		-1.49354	0.00145339		-1.49229	0.00148896		-1.49147	0.00207172		-1.4919	0.00123345		-1.48818	0.000890214		-1.48792	0.00160547		-1.48669	0.00211896		-1.48725	0.00137772		-1.48399	0.00121972		-1.48814	0.00149895		-1.48807	0.00217925		-1.48914	0.00211075		-1.49415	0.0010586		-1.48639	0.00171052
-1.48217	0.00487331		-1.48149	0.00470001		-1.48917	0.00199772		-1.48448	0.00193837		-1.48741	0.00179638		-1.48409	0.000738788		-1.4835	0.00201412		-1.48198	0.000758153		-1.48107	0.00206669		-1.48194	0.00245124		-1.47993	0.00104991		-1.48408	0.00137286		-1.48057	0.00163563		-1.48102	0.00254764		-1.48978	0.000717931		-1.48045	0.000988666
-1.47842	0.00570023		-1.4743	0.00450683		-1.48229	0.0029626		-1.47729	0.00150938		-1.48147	0.0013454		-1.47877	0.00141483		-1.47569	0.00117434		-1.47823	0.00137919		-1.47294	0.00215862		-1.47788	0.00244882		-1.47431	0.00152154		-1.47815	0.00172754		-1.4765	0.0015211		-1.47539	0.00309176		-1.48228	0.0016311		-1.47639	0.000994138
-1.47404	0.00483327		-1.46618	0.00458981		-1.47448	0.00199812		-1.4726	0.00186153		-1.47335	0.0014732		-1.47471	0.00151676		-1.46819	0.000512356		-1.47198	0.000693853		-1.46638	0.00164195		-1.47069	0.00179044		-1.46618	0.00184736		-1.46971	0.00106778		-1.47244	0.00108157		-1.47133	0.00275676		-1.47447	0.00219888		-1.47014	0.00143474
-1.46654	0.00453845		-1.46118	0.00470879		-1.46917	0.00137876		-1.46792	0.00303061		-1.46679	0.00247381		-1.46784	0.00139642		-1.46412	0.000770636		-1.46355	0.00137135		-1.46263	0.003009		-1.46256	0.001674		-1.45962	0.00210276		-1.46345	0.00137832		-1.46526	0.000993124		-1.46477	0.0011182		-1.46946	0.00164244		-1.4617	0.00202483
-1.45935	0.00478261		-1.45743	0.00526506		-1.46479	0.00206452		-1.46042	0.00205978		-1.46272	0.00173133		-1.46003	0.00154246		-1.45975	0.00108818		-1.45761	0.00180935		-1.45763	0.00269873		-1.45788	0.00157957		-1.45587	0.00203008		-1.46002	0.00175398		-1.45776	0.00143968		-1.45664	0.00238514		-1.4654	0.000100336		-1.45607	0.00158511
-1.45467	0.00514966		-1.45118	0.0047382		-1.45792	0.00251679		-1.4526	0.00117699		-1.4571	0.00127678		-1.4544	0.00127371		-1.45256	0.00107725		-1.45417	0.00200539		-1.45013	0.00196507		-1.45413	0.0018173		-1.45087	0.00204955		-1.45471	0.00145677		-1.45275	0.00181252		-1.45101	0.00268683		-1.45821	0.000981165		-1.45264	0.00176218
-1.44998	0.00530622		-1.44368	0.00409632		-1.44979	0.00160754		-1.44854	0.00196472		-1.44897	0.00085727		-1.45034	0.00136793		-1.44537	0.00109722		-1.44855	0.00257915		-1.44326	0.00189589		-1.44756	0.00139291		-1.44337	0.00181136		-1.44721	0.00144344		-1.44838	0.00097362		-1.44758	0.00262223		-1.45009	0.000673311		-1.44702	0.00169432
-1.4431	0.00542127		-1.43774	0.00539151		-1.44479	0.001823		-1.44448	0.00139412		-1.44241	0.00113596		-1.44378	0.00231958		-1.44037	0.000832211		-1.44105	0.00103305		-1.43857	0.00220729		-1.44006	0.00152542		-1.43649	0.00235227		-1.44064	0.00148344		-1.4415	0.00143265		-1.44164	0.00144787		-1.44509	0.000582891		-1.4392	0.00131304
-1.43529	0.00510014		-1.43368	0.0062617		-1.44104	0.00248545		-1.43761	0.00139126		-1.43866	0.00155001		-1.43565	0.0027363		-1.436	0.00125378		-1.43449	0.00085449		-1.43388	0.00311896		-1.43444	0.00199669		-1.43212	0.00171354		-1.43627	0.00106668		-1.43369	0.00137822		-1.43383	0.00165233		-1.44165	0.000560227		-1.43295	0.00195917
-1.42998	0.00492495		-1.42774	0.0050058		-1.43479	0.00186061		-1.4301	0.00136865		-1.43366	0.00189628		-1.43003	0.001802		-1.42912	0.000760548		-1.43011	0.00145761		-1.42669	0.00247115		-1.43006	0.00164979		-1.42712	0.00126569		-1.43096	0.000652991		-1.42775	0.00147234		-1.42789	0.00144565		-1.43509	0.000892161		-1.42858	0.00175364
-1.42592	0.00541914		-1.41993	0.00472262		-1.42729	0.00240455		-1.4251	0.00136931		-1.42616	0.00171244		-1.42659	0.00217889		-1.42131	0.000281607		-1.4248	0.00114664		-1.41888	0.00203447		-1.42413	0.00164054		-1.41993	0.0018023		-1.42346	0.000552245		-1.42369	0.00156351		-1.42352	0.00276831		-1.42728	0.00130861		-1.42327	0.00108738
-1.41935	0.00560381		-1.41305	0.00501876		-1.42135	0.0010775		-1.42073	0.00120728		-1.41929	0.00127531		-1.42034	0.00255321		-1.41569	0.000309137		-1.4173	0.00147531		-1.41357	0.00167102		-1.416	0.00302377		-1.41212	0.0016103		-1.41627	0.0011034		-1.41744	0.000970898		-1.41789	0.00195957		-1.42165	0.00123118		-1.41545	0.00121914
-1.41123	0.00499359		-1.40899	0.00535529		-1.41729	0.00234246		-1.41417	0.00166064		-1.4146	0.00130301		-1.41284	0.00222065		-1.41131	0.000212887		-1.41011	0.00109444		-1.40919	0.00202996		-1.40944	0.00182764		-1.40712	0.00155052		-1.41158	0.00149567		-1.40932	0.000647039		-1.41039	0.0017045		-1.41728	0.00148827		-1.40827	0.000715289
-1.40529	0.00498705		-1.40368	0.00695013		-1.41135	0.00207666		-1.40604	0.00149818		-1.40991	0.00258377		-1.4069	0.00202685		-1.40537	0.000246301		-1.40542	0.00131422		-1.40263	0.00271878		-1.40537	0.00137156		-1.40274	0.00221031		-1.4069	0.00126118		-1.40338	0.00189462		-1.40321	0.00181283		-1.41134	0.00118538		-1.40389	0.00165777
-1.40123	0.00520996		-1.39586	0.00702455		-1.40323	0.00149961		-1.4001	0.000809904		-1.40272	0.00129671		-1.40253	0.00127371		-1.39725	0.000597259		-1.40073	0.000899298		-1.39451	0.00188733		-1.40006	0.00119876		-1.39587	0.00157747		-1.3994	0.00171312		-1.39932	0.00123171		-1.39851	0.00175467		-1.40321	0.000698808		-1.39889	0.00142927
-1.39498	0.005947		-1.38868	0.0051081		-1.39667	0.00120796		-1.39604	0.000858205		-1.39491	0.000878886		-1.3969	0.00169129		-1.391	0.000584649		-1.39323	0.000980849		-1.38888	0.00258696		-1.39225	0.00187783		-1.38774	0.00161482		-1.39159	0.00188445		-1.39307	0.00111264		-1.39383	0.00123231		-1.39697	0.00106167		-1.39139	0.00153389
-1.38685	0.00485533		-1.3843	0.0064764		-1.3926	0.00123616		-1.3901	0.00155526		-1.38991	0.00113386		-1.38909	0.0016703		-1.38693	0.000448679		-1.38573	0.00118562		-1.38482	0.00266267		-1.38506	0.0012298		-1.38243	0.00129195		-1.38658	0.00128238		-1.38463	0.00177261		-1.38602	0.00191939		-1.39259	0.00197343		-1.38389	0.00123622
-1.38092	0.00464696		-1.3793	0.0070083		-1.38729	0.00197618		-1.38198	0.00109158		-1.38553	0.00151119		-1.38221	0.00135423		-1.381	0.000144376		-1.38105	0.00191868		-1.37794	0.00348759		-1.38069	0.000701957		-1.37837	0.00133859		-1.38221	0.00135406		-1.37869	0.00151066		-1.37852	0.00224484		-1.38728	0.00110794		-1.37889	0.00178166
-1.37748	0.00538809		-1.37149	0.00504839		-1.37948	0.00178579		-1.37541	0.00180708		-1.37897	0.000970803		-1.37784	0.00180093		-1.37256	0.00133763		-1.37636	0.00198388		-1.36982	0.00323207		-1.37569	0.000860883		-1.37149	0.00157248		-1.37502	0.00175595		-1.37494	0.00154242		-1.37383	0.00217668		-1.37946	0.0007439		-1.37451	0.00168688
-1.37185	0.00528775		-1.36399	0.00526023		-1.37229	0.00185101		-1.37135	0.00179786		-1.37085	0.000830408		-1.37284	0.000992545		-1.36631	0.00153118		-1.36917	0.00149413		-1.3645	0.00313969		-1.36788	0.00166079		-1.36337	0.00236292		-1.3669	0.00195307		-1.36963	0.000902861		-1.36945	0.00233563		-1.37259	0.000707544		-1.36701	0.00133405
-1.36435	0.00497349		-1.35993	0.0057344		-1.36792	0.00177286		-1.36573	0.00154736		-1.36553	0.00155253		-1.36502	0.00161934		-1.36287	0.00100706		-1.36136	0.00105411		-1.36107	0.00252072		-1.36069	0.00167906		-1.35805	0.00202397		-1.3622	0.00153632		-1.36182	0.00141133		-1.36164	0.00220266		-1.36821	0.00046721		-1.3592	0.00169301
-1.35779	0.00612007		-1.35586	0.00625292		-1.36292	0.00196247		-1.3576	0.00173551		-1.36147	0.00187634		-1.35784	0.00207888		-1.35756	0.00135087		-1.35667	0.000980176		-1.35482	0.00327849		-1.35662	0.000901385		-1.35462	0.00184917		-1.35846	0.000804001		-1.35525	0.00168734		-1.35383	0.00208122		-1.36322	0.00100784		-1.35482	0.00148946
-1.35342	0.00558861		-1.34868	0.0063089		-1.3551	0.00180577		-1.35104	0.000733722		-1.3546	0.00141255		-1.35315	0.000776477		-1.35006	0		-1.35292	0.00129182		-1.34732	0.00293554		-1.35225	0.000475456		-1.34837	0.00153988		-1.35221	0.00147863		-1.35088	0.00103871		-1.34945	0.00140302		-1.35509	3.1163e-05		-1.35076	0.00133252
-1.34842	0.00558469		-1.34149	0.0047224		-1.34792	0.00184044		-1.3476	0.000820224		-1.34647	0.00110679		-1.34846	0.00133303		-1.3435	0.000658834		-1.34636	0.000961133		-1.34138	0.00285015		-1.34506	0.000868367		-1.34056	0.00127814		-1.3444	0.00225728		-1.34557	0.0011766		-1.3457	0.00129757		-1.3479	0.00103192		-1.34389	0.00151025
-1.3406	0.00527321		-1.33649	0.0055983		-1.34385	0.0014955		-1.3426	0.00128346		-1.34085	0.000895674		-1.34065	0.00131333		-1.33912	0.00105876		-1.33886	0.0013485		-1.33732	0.0030437		-1.33788	0.0015536		-1.33462	0.00160237		-1.33908	0.00164952		-1.33807	0.00126709		-1.33883	0.00198177		-1.34415	0.000694559		-1.3367	0.00135922
-1.33342	0.00578603		-1.33211	0.0066788		-1.33948	0.00192192		-1.3351	0.00161586		-1.33741	0.000719184		-1.33315	0.00125187		-1.33381	0.00144208		-1.33354	0.00105993		-1.33138	0.00238417		-1.33318	0.00137046		-1.33056	0.000734279		-1.33471	0.00138684		-1.33057	0.00107976		-1.33133	0.00130157		-1.33978	0.00034846		-1.33138	0.00113991
-1.32873	0.00547765		-1.32524	0.00607115		-1.33229	0.00197539		-1.32823	0.00129422		-1.33147	0.00106524		-1.32909	0.00173048		-1.32631	0.00122415		-1.32917	0.000580041		-1.32357	0.00277534		-1.3285	0.000713184		-1.32462	0.00189559		-1.32846	0.000829788		-1.32588	0.0018606		-1.32601	0.00158684		-1.33228	0.00114123		-1.3267	0.00175211
-1.32404	0.00563192		-1.31711	0.00593966		-1.3251	0.00209899		-1.32385	0.000997616		-1.32397	0.00145558		-1.32503	0.00176709		-1.31881	0.000472007		-1.32261	0.00175782		-1.31669	0.00267349		-1.32163	0.000864625		-1.31681	0.00159671		-1.32065	0.000680964		-1.32119	0.00114666		-1.32164	0.00221376		-1.32509	0.000819211		-1.32045	0.00119156
-1.31654	0.00499555		-1.31149	0.00457159		-1.3201	0.00212347		-1.31885	0.00116403		-1.31804	0.00127468		-1.31815	0.00170863		-1.31412	0.0011838		-1.3148	0.00126202		-1.31232	0.00257525		-1.31381	0.00100902		-1.30993	0.00105738		-1.3144	0.00154091		-1.31401	0.00110697		-1.31539	0.00187344		-1.3204	0.000844944		-1.31233	0.00091775
-1.30904	0.00578374		-1.30712	0.00551093		-1.31573	0.00131647		-1.31167	0.000829664		-1.31366	0.00165746		-1.31065	0.00195083		-1.30975	0.00111298		-1.30855	0.000994739		-1.30732	0.00244478		-1.30819	0.00121241		-1.30556	0.00170562		-1.31002	0.00172973		-1.30619	0.00150613		-1.30727	0.00136639		-1.31572	0.000736818		-1.30639	0.00180836
-1.30435	0.00628088		-1.30118	0.0063662		-1.30885	0.00166219		-1.30385	0.00175966		-1.30804	0.00123313		-1.30565	0.00145295		-1.30256	0.00131893		-1.30417	0.000776524		-1.29951	0.00310679		-1.30412	0.00188223		-1.30055	0.00171852		-1.3044	0.001582		-1.30119	0.00103123		-1.30102	0.00183459		-1.30853	0.00172554		-1.30232	0.0013995
-1.29998	0.00555315		-1.29305	0.00584724		-1.30104	0.00198793		-1.29885	0.00278209		-1.30022	0.00173112		-1.30128	0.00130091		-1.29475	0.00159591		-1.29886	0.00153759		-1.29232	0.00300359		-1.29756	0.00152652		-1.29274	0.00108093		-1.29658	0.00157937		-1.29682	0.00132583		-1.29695	0.00210231		-1.30072	0.00155768		-1.29639	0.00124563
-1.29248	0.00493475		-1.2868	0.00500251		-1.2951	0.00276849		-1.29448	0.00194408		-1.29335	0.00158254		-1.29471	0.00169172		-1.28943	0.00108608		-1.29105	0.00132901		-1.28763	0.00232739		-1.28944	0.000767773		-1.28556	0.000718882		-1.28971	0.00130161		-1.28963	0.00152518		-1.29133	0.00255785		-1.2954	0.000415035		-1.28826	0.0016882
-1.28467	0.00388639		-1.28274	0.00559457		-1.29104	0.00275184		-1.2876	0.000813198		-1.28897	0.0018713		-1.28659	0.0012311		-1.28506	0.00061281		-1.28417	0.000840824		-1.28294	0.00227151		-1.2835	0.000909089		-1.28087	0.000542501		-1.28533	0.00149349		-1.2815	0.000906943		-1.2832	0.00268084		-1.29134	0.000903729		-1.2817	0.00104886
-1.27998	0.00447308		-1.2768	0.0052036		-1.28479	0.00181262		-1.27948	0.000926922		-1.28397	0.00167635		-1.28096	0.000664052		-1.27819	0.000346335		-1.2798	0.000965838		-1.27513	0.00241549		-1.27975	0.00123905		-1.27618	0.00104923		-1.28033	0.00146836		-1.27682	0.000730725		-1.27664	0.00304358		-1.28478	0.00132844		-1.27764	0.00155906
-1.27623	0.00456819		-1.26837	0.00643447		-1.27698	0.0017664		-1.27416	0.00167382		-1.27616	0.00203877		-1.27659	0.00109362		-1.27006	0.00058633		-1.27449	0.00122819		-1.26763	0.00240918		-1.2735	0.00102135		-1.26837	0.00100394		-1.27221	0.00129811		-1.27338	0.000874512		-1.27258	0.00280849		-1.27665	0.00128713		-1.27201	0.000641965
-1.26935	0.00418023		-1.26211	0.00579038		-1.27104	0.00222533		-1.2701	0.00170148		-1.26897	0.000767241		-1.27065	0.00219281		-1.26506	0.000280976		-1.26636	0.00168949		-1.26325	0.00306758		-1.26506	0.00135593		-1.26087	0.00121927		-1.26502	0.00149108		-1.26682	0.000521396		-1.26695	0.00229234		-1.27071	0.00145215		-1.26389	0.00130166
-1.26185	0.00503935		-1.25868	0.00491251		-1.26698	0.00163908		-1.26323	0.000902553		-1.26428	0.0007536		-1.26253	0.0017945		-1.26131	0.000460868		-1.25948	0.00116658		-1.25919	0.00303311		-1.25913	0.00150583		-1.2568	0.00205453		-1.26127	0.000576066		-1.25901	0.000254234		-1.25852	0.00240334		-1.26665	0.00110959		-1.25733	0.00154571
-1.25654	0.00459467		-1.25337	0.00514279		-1.26073	0.00224942		-1.25479	0.00165142		-1.2596	0.00149587		-1.25628	0.00100711		-1.25506	0.0011134		-1.25573	0.0012134		-1.25201	0.00386704		-1.25569	0.00145564		-1.25274	0.00203121		-1.25658	0.000852516		-1.25369	0.00106842		-1.25195	0.00189897		-1.2604	0.000734693		-1.25357	0.000947298
-1.25217	0.00486514		-1.24555	0.00635083		-1.25229	0.00281687		-1.24979	0.00235529		-1.25179	0.00120375		-1.25221	0.0020716		-1.24725	0.000370923		-1.25105	0.00251082		-1.24482	0.00309395		-1.25006	0.00221659		-1.24555	0.00114568		-1.2494	0.00138225		-1.24932	0.00108656		-1.24851	0.00149848		-1.25197	0.00150669		-1.24858	0.000840486
-1.24592	0.0052317		-1.23899	0.00446007		-1.24635	0.00176228		-1.24604	0.00181784		-1.24429	0.00122599		-1.24659	0.00133303		-1.24193	0.0013824		-1.24355	0.00174707		-1.23982	0.00346866		-1.24256	0.00133766		-1.23805	0.0016103		-1.24221	0.001193		-1.24307	0.00145691		-1.24352	0.001869		-1.24603	0.00168044		-1.24108	0.000775043
-1.23779	0.00579584		-1.23493	0.00459573		-1.2426	0.00207157		-1.2401	0.0021072		-1.23991	0.0011112		-1.23815	0.000525931		-1.23756	0.00140341		-1.23636	0.00129316		-1.23544	0.00245132		-1.236	0.00173519		-1.23305	0.00125935		-1.2372	0.00205535		-1.23494	0.00120744		-1.23602	0.00231943		-1.24259	0.00106757		-1.2342	0.0012152
-1.23154	0.00589177		-1.22962	0.00605557		-1.23729	0.00214659		-1.23229	0.00159346		-1.23585	0.00129335		-1.23159	0.00151205		-1.23162	3.42551e-05		-1.23198	0.00133819		-1.22888	0.00270594		-1.23162	0.00169007		-1.22868	0.00126229		-1.23283	0.00219106		-1.22869	0.00144739		-1.22914	0.00193027		-1.23697	0.000711084		-1.22951	0.00177006
-1.22748	0.00502823		-1.22212	0.00602857		-1.22979	0.0022743		-1.22635	0.00149138		-1.22897	0.000861257		-1.22815	0.00144974		-1.2235	0.000809514		-1.2273	0.000135096		-1.22076	0.00258539		-1.22631	0.00189478		-1.22212	0.00141716		-1.22596	0.00133002		-1.22432	0.00138185		-1.22476	0.00171093		-1.22915	0.00111951		-1.22482	0.00204431
-1.22185	0.00509556		-1.21462	0.00628102		-1.22323	0.00145319		-1.22229	0.00100552		-1.22147	0.001158		-1.22315	0.00182406		-1.21693	0.000987515		-1.22011	0.000954636		-1.21482	0.00209801		-1.21881	0.0013786		-1.21399	0.00145361		-1.21815	0.000611032		-1.219	0.00143015		-1.21977	0.00157618		-1.2229	0.000658438		-1.21764	0.00210494
-1.21373	0.00536914		-1.20993	0.00603713		-1.21885	0.00108005		-1.21635	0.000803977		-1.21616	0.00102327		-1.21534	0.0012872		-1.21287	0.00119473		-1.2123	0.0017278		-1.21076	0.00226926		-1.21163	0.00130376		-1.20806	0.000978132		-1.21252	0.00143645		-1.21119	0.00144603		-1.21227	0.00262068		-1.21853	0.000743664		-1.20983	0.00112284
-1.20717	0.00542454		-1.20524	0.00459947		-1.21354	0.00148551		-1.20854	0.00197372		-1.21178	0.00155673		-1.20877	0.00082423		-1.20756	0.00185041		-1.20698	0.00131758		-1.20482	0.00208899		-1.20694	0.0014497		-1.20399	0.00139112		-1.20846	0.00192685		-1.20432	0.000886304		-1.20477	0.00105116		-1.21322	0.00111998		-1.20452	0.00116333
-1.2031	0.00523121		-1.19837	0.00467674		-1.20604	0.00206785		-1.20167	0.00215572		-1.20522	0.00196763		-1.2044	0.000965777		-1.19943	0.000662196		-1.20261	0.00104985		-1.19669	0.00257367		-1.20225	0.00180453		-1.19774	0.000712995		-1.2019	0.00100659		-1.19994	0.000663595		-1.19977	0.00201685		-1.2054	0.000371124		-1.20014	0.00181733
-1.19748	0.00522385		-1.19055	0.00529755		-1.19854	0.00199812		-1.1976	0.00173002		-1.19741	0.00202177		-1.1994	0.00102253		-1.19256	0.00105813		-1.19605	0.00115717		-1.19013	0.0018853		-1.19475	0.00213977		-1.18962	0.00120546		-1.19377	0.000725327		-1.19463	0.000968857		-1.19539	0.00285089		-1.19822	0.00061854		-1.19357	0.00148004
-1.18935	0.00631716		-1.18524	0.00566482		-1.19385	0.00123851		-1.19229	0.0014512		-1.19147	0.00181212		-1.1919	0.00219238		-1.18819	0.000927411		-1.18792	0.000716481		-1.18607	0.00220909		-1.18725	0.00148602		-1.18337	0.00174615		-1.18783	0.00107171		-1.18682	0.000911932		-1.18852	0.00212651		-1.19353	0.000696211		-1.18545	0.00132158
-1.18248	0.00538319		-1.18118	0.00506112		-1.18917	0.00117133		-1.18448	0.00155241		-1.18741	0.00209858		-1.1844	0.00263094		-1.18319	0.00049029		-1.1823	0.000387142		-1.18044	0.00349007		-1.18225	0.00117015		-1.1793	0.00162909		-1.18377	0.00102035		-1.17963	0.00120812		-1.18039	0.00163701		-1.18884	0.000647342		-1.17983	0.00206992
-1.17873	0.00600567		-1.17399	0.00549776		-1.18198	0.00191076		-1.17729	0.00142288		-1.18116	0.00187361		-1.1794	0.00192684		-1.17506	0.000733859		-1.17823	0.00050902		-1.17201	0.00386434		-1.17787	0.0011138		-1.17337	0.0015066		-1.17752	0.00179966		-1.17557	0.000754992		-1.17508	0.00114817		-1.18134	0.000501442		-1.17576	0.00168863
-1.17404	0.00582721		-1.16586	0.00614009		-1.17417	0.00162399		-1.17291	0.00266287		-1.17304	0.00205787		-1.17471	0.00151419		-1.16787	0.000404757		-1.17167	0.000703711		-1.16576	0.00269692		-1.17069	0.00125666		-1.16524	0.00138048		-1.16908	0.00170241		-1.17119	0.00093824		-1.1707	0.00196246		-1.17353	0.000119458		-1.1692	0.00200469
-1.16654	0.00502366		-1.16086	0.00538624		-1.16917	0.00183554		-1.16792	0.00194715		-1.16678	0.0016946		-1.16784	0.0025879		-1.16381	0.00105813		-1.16323	0.00133058		-1.16232	0.00258381		-1.16256	0.00103169		-1.15899	0.00145905		-1.16346	0.00109793		-1.16369	0.0013916		-1.16414	0.00197933		-1.16884	0.000572975		-1.16107	0.00181602
-1.15967	0.0045123		-1.15743	0.00502929		-1.16479	0.00143654		-1.1601	0.00134362		-1.16272	0.00140374		-1.16003	0.00159749		-1.15944	0.000597889		-1.15761	0.00205243		-1.15701	0.00207322		-1.15788	0.00168501		-1.15524	0.00144659		-1.16002	0.00102079		-1.15682	0.00138842		-1.15601	0.00211985		-1.16446	0.00130602		-1.15545	0.00249585
-1.15529	0.00483735		-1.15087	0.00393255		-1.1576	0.00211858		-1.1526	0.000672908		-1.1571	0.00156638		-1.15471	0.00212814		-1.15225	0.000872771		-1.15448	0.000953068		-1.1495	0.00199143		-1.15412	0.00155624		-1.15024	0.00130282		-1.15408	0.0010186		-1.15182	0.00139228		-1.1507	0.00256762		-1.15696	0.00125573		-1.15201	0.00234461
-1.1506	0.00509736		-1.14305	0.00429938		-1.14979	0.00173133		-1.14854	0.000659516		-1.14897	0.00149734		-1.15034	0.002126		-1.14506	0.00157216		-1.14855	0.00162586		-1.14294	0.00245335		-1.14756	0.00180695		-1.14274	0.000492236		-1.14627	0.00200487		-1.14713	0.0014483		-1.14726	0.00193471		-1.14884	0.00083314		-1.14607	0.00120754
-1.14342	0.00450658		-1.13743	0.00479594		-1.14479	0.0016381		-1.14448	0.000898382		-1.14241	0.000870071		-1.14346	0.00119491		-1.14006	0.00122898		-1.14073	0.00127165		-1.13825	0.00280125		-1.13975	0.000953553		-1.13618	0.00130237		-1.14033	0.00118185		-1.14025	0.000793093		-1.14102	0.00228813		-1.14415	0.000485625		-1.13826	0.00185389
-1.1356	0.00448125		-1.13305	0.00463327		-1.14135	0.00214385		-1.13729	0.00129883		-1.13866	0.00121865		-1.13534	0.00135359		-1.13569	0.00107179		-1.1348	0.000555844		-1.13326	0.00159801		-1.13444	0.000648248		-1.13149	0.001642		-1.13595	0.00120218		-1.13213	0.00129		-1.1332	0.00220621		-1.1404	0.000537091		-1.13233	0.00193969
-1.13029	0.0049511		-1.12711	0.0052756		-1.13479	0.00206981		-1.1301	0.0022712		-1.13366	0.00135862		-1.13034	0.00204998		-1.12881	0.0016371		-1.13042	0.000275345		-1.12576	0.00129269		-1.13006	0.00208848		-1.12649	0.00134471		-1.13064	0.00139515		-1.12682	0.000946632		-1.12727	0.00118058		-1.13384	0.00136173		-1.12826	0.00159167
-1.12592	0.00531324		-1.1193	0.00549951		-1.12698	0.00237517		-1.12511	0.00281985		-1.12616	0.00108518		-1.1269	0.00149899		-1.12069	0.00111277		-1.1248	0.00107853		-1.11825	0.00235465		-1.12381	0.00198349		-1.11899	0.00186321		-1.12314	0.00117486		-1.12276	0.0013984		-1.1232	0.00146074		-1.12603	0.00191393		-1.12232	0.00199834
-1.11935	0.00575645		-1.11274	0.00533882		-1.12167	0.00192016		-1.12073	0.00182289		-1.11929	0.00133994		-1.12065	0.00168979		-1.11537	0.00142653		-1.11698	0.00119346		-1.11326	0.00301801		-1.116	0.00177658		-1.11149	0.00223589		-1.11596	0.00129134		-1.11619	0.00168892		-1.11726	0.00139414		-1.12072	0.00150905		-1.11451	0.00165624
-1.11123	0.0058009		-1.10837	0.00577282		-1.11729	0.00168472		-1.11385	0.00113308		-1.11491	0.00218924		-1.11284	0.00167673		-1.11131	0.000334986		-1.1098	0.0016747		-1.10888	0.00340062		-1.10975	0.00157231		-1.10649	0.00143731		-1.11127	0.00184293		-1.10775	0.00135667		-1.10945	0.00188498		-1.11634	0.000699044		-1.10764	0.0015932
-1.1056	0.00570563		-1.10305	0.00574362		-1.11104	0.00200967		-1.10573	0.00122507		-1.10991	0.00207466		-1.1069	0.00218231		-1.10475	0.000608397		-1.10542	0.000967855		-1.10169	0.00316064		-1.10538	0.00199273		-1.10212	0.00168162		-1.10627	0.00147994		-1.10213	0.00171319		-1.10289	0.00323983		-1.11009	0.000127485		-1.10327	0.00185498
-1.10154	0.00619181		-1.09493	0.00472306		-1.10323	0.00151156		-1.1001	0.00116403		-1.10241	0.00220771		-1.10284	0.00177159		-1.09662	0.00142926		-1.10073	0.00159562		-1.09388	0.00242518		-1.10006	0.00137464		-1.09493	0.00207898		-1.09877	0.00147863		-1.09807	0.00119656		-1.09852	0.00221487		-1.10228	0.000214128		-1.09826	0.00147238
-1.09467	0.00538531		-1.08805	0.00464557		-1.09667	0.00106869		-1.09604	0.00191488		-1.09491	0.00155337		-1.0969	0.0015628		-1.09069	0.00172768		-1.09292	0.00184363		-1.08888	0.0022812		-1.09225	0.00102817		-1.08712	0.00184736		-1.09127	0.00139602		-1.09182	0.000457667		-1.0932	0.00185235		-1.09603	0.000193825		-1.09045	0.00113991
-1.08654	0.0053224		-1.08368	0.00512523		-1.09229	0.00151724		-1.08979	0.00185802		-1.09022	0.00155001		-1.08909	0.00219581		-1.08662	0.000772947		-1.08542	0.00101737		-1.08451	0.00341211		-1.08537	0.00123728		-1.0818	0.00136961		-1.08627	0.00118448		-1.08338	0.000317283		-1.08539	0.00106159		-1.09165	0.00146868		-1.08295	0.00126095
-1.08123	0.00448518		-1.07868	0.0060323		-1.08698	0.00177443		-1.08167	0.00144637		-1.08554	0.00187046		-1.08253	0.00162148		-1.08037	0.000267736		-1.08105	0.000951499		-1.07763	0.00273568		-1.081	0.000980847		-1.07743	0.00107142		-1.08189	0.000816895		-1.07775	0.000432493		-1.0782	0.00160326		-1.08603	0.00136008		-1.07826	0.00172015
-1.07748	0.00521176		-1.07055	0.00592495		-1.07917	0.00165142		-1.07541	0.000740748		-1.07866	0.00147194		-1.07815	0.00173005		-1.07194	0.000251555		-1.07636	0.000829846		-1.06919	0.00294073		-1.07569	0.000534668		-1.07055	0.00103564		-1.07471	0.0012885		-1.074	0.00109405		-1.07352	0.00218401		-1.0779	0.000656549		-1.07357	0.00114976
-1.07185	0.00518872		-1.06368	0.00506486		-1.07229	0.00199322		-1.07135	0.00207251		-1.07085	0.000666299		-1.07284	0.00132318		-1.06631	0.000105708		-1.06886	0.0010438		-1.06419	0.00300945		-1.06787	0.00109839		-1.06243	0.00139791		-1.06689	0.00179332		-1.06838	0.00118862		-1.06883	0.00212829		-1.07134	0.000902548		-1.06607	0.000799337
-1.06404	0.00479503		-1.05961	0.00495334		-1.06792	0.00165769		-1.06542	0.00224661		-1.06554	0.001158		-1.06503	0.00129791		-1.06287	0.000622477		-1.06105	0.000865916		-1.06076	0.00323297		-1.06069	0.00105173		-1.05743	0.00157973		-1.06221	0.00154681		-1.06057	0.00226792		-1.06101	0.00193448		-1.06728	0.00124086		-1.05857	0.00105455
-1.0581	0.00473815		-1.05524	0.00479923		-1.06292	0.00168237		-1.05729	0.00210061		-1.06116	0.00184213		-1.05784	0.00163497		-1.05725	0.000295687		-1.05667	0.000630002		-1.05451	0.0026834		-1.05663	0.00102201		-1.05368	0.000786129		-1.05814	0.00118251		-1.05432	0.00228924		-1.05351	0.00195402		-1.06165	0.000961333		-1.0542	0.000717478
-1.05373	0.00514067		-1.04805	0.00403639		-1.05479	0.0017758		-1.05104	0.00133308		-1.05429	0.00150699		-1.05315	0.00129577		-1.04944	0.000453933		-1.05292	0.000754792		-1.04669	0.00216673		-1.05225	0.00123442		-1.04743	0.000701901		-1.05158	0.0015431		-1.04994	0.00159866		-1.04945	0.00126139		-1.05353	0.00110251		-1.05013	0.000428123
-1.0481	0.00450201		-1.04086	0.00337869		-1.0476	0.00168139		-1.04729	0.00102133		-1.04616	0.00120941		-1.04846	0.00123902		-1.04318	0.0013887		-1.04605	0.000347935		-1.04107	0.00188913		-1.04475	0.00164186		-1.03993	0.00106644		-1.04408	0.00154331		-1.04463	0.00088381		-1.04539	0.00267951		-1.04665	0.00120096		-1.04326	0.000916436
-1.04029	0.0042992		-1.03586	0.00412178		-1.04385	0.00247683		-1.04198	0.000765117		-1.04116	0.00115443		-1.04065	0.00181549		-1.03881	0.00159591		-1.03855	0.000904227		-1.03669	0.002178		-1.03756	0.00111358		-1.0343	0.00138433		-1.03846	0.0013958		-1.03682	0.00132878		-1.0382	0.00197866		-1.0429	0.000731624		-1.03576	0.0017254
-1.0331	0.00526945		-1.03118	0.00468574		-1.03948	0.00187393		-1.03448	0.00150608		-1.03772	0.00134624		-1.03315	0.00201935		-1.0335	0.000840617		-1.03323	0.000947915		-1.03075	0.00294771		-1.03319	0.000674222		-1.02993	0.00166577		-1.03439	0.0011305		-1.02963	0.000775857		-1.0307	0.00111154		-1.03822	0.000941974		-1.03045	0.00168054
-1.02873	0.00555626		-1.0243	0.00562881		-1.03198	0.0016236		-1.02791	0.000868962		-1.03147	0.00213027		-1.02909	0.00108912		-1.026	0.0007347		-1.02886	0.00141011		-1.02294	0.00317304		-1.0285	0.00184305		-1.02399	0.0018854		-1.02814	0.00212113		-1.02494	0.00163789		-1.0257	0.00189208		-1.03072	0.00109968		-1.02607	0.00124103
-1.02404	0.00559907		-1.01649	0.00562355		-1.02479	0.00203494		-1.02354	0.000946462		-1.02366	0.00216574		-1.02502	0.00127992		-1.01881	0.00124853		-1.0223	0.000984434		-1.01638	0.00273861		-1.02131	0.00109575		-1.01618	0.000582351		-1.02002	0.00165958		-1.02026	0.00145215		-1.02133	0.00209344		-1.02384	0.00146183		-1.01951	0.00137214
-1.01623	0.0051794		-1.01118	0.00544617		-1.0201	0.00174015		-1.01854	0.00136601		-1.01772	0.00186144		-1.01815	0.00116557		-1.01412	0.000893996		-1.01448	0.00119414		-1.01201	0.00246304		-1.0135	0.00144882		-1.00931	0.00104153		-1.01377	0.000579781		-1.01276	0.000251513		-1.01445	0.00209077		-1.01915	0.000963222		-1.0117	0.00208217
-1.00873	0.00445837		-1.0068	0.00499439		-1.01542	0.00136427		-1.01104	0.00143517		-1.01366	0.0013433		-1.01065	0.00103066		-1.00912	0.00115585		-1.00823	0.00137807		-1.00669	0.00267507		-1.00819	0.00130112		-1.00493	0.00152879		-1.00971	0.00130751		-1.00494	0.000766559		-1.00664	0.00278029		-1.01447	0.000789936		-1.00576	0.00202001
-1.00435	0.00424984		-1.00024	0.00457488		-1.00854	0.00170254		-1.00354	0.00140465		-1.00772	0.000899452		-1.00565	0.00158443		-1.00193	0.00172011		-1.00417	0.00164715		-0.998879	0.00234947		-1.00382	0.00118622		-0.99993	0.00133837		-1.00408	0.00200749		-1.00025	0.000456306		-1.0007	0.00221642		-1.00728	0.00100241		-1.0017	0.000778544
-0.999666	0.00468602		-0.992113	0.00633349		-1.00042	0.00252306		-0.998541	0.00110058		-0.999598	0.0005769		-1.00127	0.0016596		-0.994122	0.00078997		-0.998233	0.000766666		-0.991692	0.00208178		-0.997247	0.00180629		-0.991804	0.00111489		-0.995955	0.00159445		-0.99588	0.000543395		-0.996957	0.0019296		-0.999467	0.000746969		-0.995447	0.000877257
-0.992165	0.00531259		-0.98649	0.00591002		-0.995103	0.0021842		-0.994165	0.00143188		-0.993035	0.00152231		-0.9944	0.00164418		-0.989123	0.000224655		-0.990107	0.000991603		-0.987317	0.0021593		-0.989435	0.00165639		-0.984617	0.00111127		-0.989394	0.00142115		-0.98838	0.00104551		-0.990701	0.00260403		-0.994153	0.00050215		-0.987322	0.00110139
-0.984353	0.00581937		-0.982114	0.00518296		-0.991041	0.00217538		-0.987291	0.00128434		-0.988659	0.00173972		-0.986275	0.00128078		-0.984747	0.000672074		-0.983859	0.0018266		-0.982318	0.00245312		-0.983499	0.00104204		-0.980242	0.00159898		-0.985335	0.00050067		-0.980567	0.00132152		-0.982575	0.00153889		-0.99009	0.000709196		-0.980761	0.00146735
-0.979978	0.00456754		-0.975866	0.00467893		-0.984478	0.00186786		-0.979166	0.00137084		-0.983347	0.00198757		-0.980652	0.00135808		-0.97756	0.000535053		-0.979483	0.00111169		-0.974505	0.00310409		-0.97944	0.00128571		-0.975241	0.0015555		-0.979705	0.00142072		-0.976192	0.00149025		-0.976327	0.00180795		-0.983216	0.000713445		-0.977015	0.00181011
-0.976229	0.00454041		-0.967741	0.00371522		-0.976353	0.0016428		-0.973852	0.00154802		-0.975535	0.00178925		-0.976589	0.00126558		-0.969435	0.000773578		-0.973861	5.57859e-05		-0.967005	0.00250247		-0.973192	0.00163548		-0.967428	0.00149663		-0.971579	0.000991069		-0.972129	0.0016295		-0.972268	0.00142056		-0.975091	0.000618304		-0.971071	0.00147851
-0.969353	0.00440967		-0.961801	0.00460122		-0.970415	0.00137778		-0.96979	0.00154165		-0.968348	0.0016052		-0.970337	0.00127692		-0.964747	0.000241888		-0.965735	0.000915205		-0.962943	0.00196326		-0.964754	0.00127779		-0.960241	0.000911565		-0.964705	0.00126643		-0.965568	0.00106003		-0.966332	0.000834266		-0.969777	0.000284717		-0.962954	0.000940294
-0.961853	0.00526275		-0.958364	0.00455271		-0.966666	0.00151333		-0.962603	0.00102133		-0.963973	0.00142913		-0.962211	0.00156837		-0.960997	0.00105182		-0.95917	0.00180061		-0.95888	0.00216245		-0.959123	0.00168501		-0.956179	0.000899112		-0.960959	0.00142989		-0.958068	0.000738209		-0.957894	0.00141301		-0.965714	0.000226168		-0.956385	0.0012314
-0.956541	0.00479143		-0.952741	0.00511162		-0.960103	0.00147219		-0.954477	0.00158578		-0.959284	0.00128622		-0.956276	0.00105893		-0.954436	0.000467593		-0.955733	0.00147867		-0.951693	0.00235172		-0.95569	0.00112525		-0.951803	0.0011038		-0.956267	0.000604913		-0.952754	0.00146825		-0.951638	0.00243753		-0.95884	0.00110771		-0.952951	0.0016453
-0.952165	0.00477607		-0.944929	0.00475708		-0.951978	0.00143517		-0.949476	0.0013344		-0.951472	0.00139849		-0.952213	0.00205254		-0.946936	0.000948426		-0.950732	0.00116367		-0.944504	0.00309981		-0.949754	0.00101563		-0.944616	0.00168637		-0.948768	0.000734506		-0.948379	0.00148572		-0.948205	0.00219333		-0.950715	0.00112187		-0.947947	0.00175145
-0.945603	0.00568193		-0.938676	0.00390533		-0.94604	0.00182927		-0.946039	0.000610337		-0.943972	0.00152504		-0.945965	0.00180157		-0.941622	0.00113084		-0.943232	0.000630226		-0.939505	0.00226948		-0.942255	0.00130728		-0.93743	0.00141331		-0.941581	0.000600761		-0.941818	0.000870883		-0.9432	0.00164633		-0.945401	0.000666701		-0.940134	0.000842019
-0.937791	0.00607905		-0.934301	0.00470681		-0.942603	0.00209468		-0.939791	0.00116776		-0.939909	0.000894835		-0.937839	0.00147672		-0.937247	0.000971964		-0.936358	0.000381093		-0.93513	0.00211874		-0.935998	0.00127801		-0.932429	0.00137142		-0.937209	0.000532358		-0.934005	0.00097294		-0.935388	0.00203261		-0.941651	0.00103263		-0.933573	0.000581336
-0.93154	0.00542731		-0.928678	0.00495641		-0.936979	0.00208567		-0.931978	0.00136096		-0.935536	0.000712258		-0.9319	0.0019761		-0.930998	0.000808884		-0.931983	0		-0.928256	0.00290873		-0.931627	0.00121769		-0.928057	0.0012924		-0.932517	0.000541974		-0.927753	0.00138343		-0.928826	0.00228369		-0.936028	3.89536e-05		-0.928888	0.000933509
-0.927479	0.00484356		-0.921178	0.00427457		-0.929478	0.00138738		-0.926352	0.00097676		-0.928347	0.00141151		-0.92815	0.0015461		-0.923186	0.000879075		-0.926986	0.000828726		-0.92013	0.00379133		-0.926317	0.00145674		-0.921179	0.00232261		-0.925017	0.000287814		-0.923381	0.0014365		-0.924455	0.00226304		-0.928216	0.000491999		-0.923891	0.000683552
-0.921853	0.00492822		-0.913988	0.00466971		-0.922916	0.00223199		-0.92198	0.00113088		-0.92116	0.00178967		-0.922836	0.00145295		-0.916935	0.000587171		-0.919482	0.00162295		-0.914506	0.00330237		-0.918504	0.00102443		-0.913054	0.00161324		-0.917205	0.000751333		-0.917755	0.00137776		-0.919145	0.00181461		-0.922276	0.000798907		-0.916697	0.00126576
-0.913729	0.00406681		-0.909303	0.00493863		-0.91854	0.00236988		-0.91604	0.00140707		-0.916161	0.00135799		-0.915336	0.0019519		-0.91256	0.00108124		-0.91167	0.000641203		-0.910443	0.002799		-0.91131	0.00123883		-0.907118	0.00146358		-0.912208	0.000955011		-0.909942	0.00101762		-0.91195	0.00163323		-0.917904	0.0013164		-0.908884	0.00188869
-0.907165	0.00425311		-0.904615	0.00476125		-0.913228	0.00249329		-0.908228	0.00117238		-0.911786	0.00175169		-0.908775	0.00122789		-0.906935	0.00165412		-0.906672	0.000368995		-0.904193	0.00224898		-0.906938	0.00158397		-0.903055	0.00157339		-0.908149	0.00124632		-0.903068	0.000525478		-0.90445	0.00129691		-0.912278	0.000373249		-0.903887	0.00174073
-0.903104	0.00407024		-0.897428	0.00411498		-0.905729	0.00241513		-0.901354	0.00094734		-0.90491	0.00199008		-0.9044	0.00154203		-0.899123	0.0011901		-0.90261	0.00128577		-0.896067	0.00268047		-0.901941	0.00140986		-0.896807	0.00124644		-0.901267	0.00131101		-0.899005	0.000800124		-0.899453	0.00165743		-0.904465	0.00046296		-0.899515	0.00170702
-0.897478	0.00457473		-0.889616	0.0036228		-0.898541	0.00234442		-0.897291	0.00216758		-0.897097	0.00189628		-0.899399	0.00153732		-0.892249	0.00092699		-0.895736	0.00204818		-0.89013	0.00249954		-0.894441	0.000975124		-0.888682	0.000902509		-0.893454	0.00113858		-0.893379	0.0007686		-0.895082	0.00102652		-0.897278	0.00114288		-0.892328	0.00175692
-0.889354	0.00421389		-0.884927	0.00457049		-0.893853	0.00245646		-0.891977	0.00219524		-0.891472	0.00133323		-0.891586	0.000975414		-0.888186	0.000232851		-0.88761	0.00166888		-0.886067	0.00310814		-0.886941	0.00125776		-0.882742	0.0013232		-0.887832	0.00122272		-0.885253	0.000208422		-0.887895	0.0010223		-0.892903	0.00131097		-0.884516	0.00147326
-0.88279	0.00438467		-0.880552	0.00378854		-0.889165	0.00224883		-0.884165	0.00225693		-0.88741	0.00144193		-0.884086	0.00138614		-0.882872	0.000152152		-0.882296	0.00109735		-0.879817	0.0034396		-0.882249	0.00199141		-0.878679	0.00157747		-0.883773	0.00144475		-0.878692	0.000472862		-0.880082	0.00113751		-0.887902	0.00123637		-0.879198	0.000797805
-0.879041	0.00449188		-0.873052	0.00353895		-0.881666	0.00293283		-0.876978	0.00211181		-0.881159	0.000159072		-0.879402	0.00138014		-0.874747	0.000271729		-0.878234	0.000884288		-0.871693	0.00312797		-0.877878	0.00162227		-0.872744	0.00166169		-0.877204	0.00168821		-0.874942	0.00157689		-0.874765	0.00140524		-0.880089	0.00180699		-0.875139	0.00215747
-0.87404	0.00450658		-0.86524	0.00539963		-0.874166	0.00236753		-0.872603	0.00160576		-0.873036	0.00065056		-0.875027	0.0015249		-0.867873	0.000860162		-0.87136	0.000519774		-0.865443	0.00225528		-0.870378	0.000990092		-0.864306	0.00161482		-0.869086	0.00171246		-0.870254	0.00158505		-0.870706	0.00088022		-0.87259	0.000788284		-0.868265	0.00267818
-0.866541	0.00418333		-0.860551	0.00626082		-0.869166	0.00205022		-0.867601	0.00164879		-0.867098	0.00105789		-0.86784	0.00113152		-0.86381	0.00184663		-0.863234	3.65186e-05		-0.862006	0.00208471		-0.862566	0.00134778		-0.858053	0.00172011		-0.863456	0.00119977		-0.862754	0.0016769		-0.863519	0.00132022		-0.867901	0.00178314		-0.86014	0.00125745
-0.859666	0.00479209		-0.856802	0.00373322		-0.86479	0.00187099		-0.859789	0.00176339		-0.863036	0.00180814		-0.860027	0.00102702		-0.859435	0.00184999		-0.858233	0.000425229		-0.856379	0.00215569		-0.858186	0.00116619		-0.854616	0.00159309		-0.860022	0.00115891		-0.855567	0.00159526		-0.855393	0.0014361		-0.863217	0.0012477		-0.854822	0.00137411
-0.855291	0.00419771		-0.849927	0.00347155		-0.857291	0.00206177		-0.852289	0.00159873		-0.857098	0.00184843		-0.854713	0.00129791		-0.851935	0.00117539		-0.854483	0.000679739		-0.84888	0.0020036		-0.85444	0.00142813		-0.849306	0.00179687		-0.854079	0.000687083		-0.850879	0.00097997		-0.850389	0.00221775		-0.855713	0.000653952		-0.851389	0.00117602
-0.850291	0.00441948		-0.842428	0.00350514		-0.849791	0.00225079		-0.848539	0.00133989		-0.84866	0.00195525		-0.850651	0.000857636		-0.844748	0.000779883		-0.848235	0.000932456		-0.842629	0.00145831		-0.847566	0.00216596		-0.841807	0.00124621		-0.846267	0.00136324		-0.846191	0.00138774		-0.846643	0.00232698		-0.847901	0.000964874		-0.84514	0.000680706
-0.843103	0.00483082		-0.837114	0.00390753		-0.845104	0.00259396		-0.844164	0.00176273		-0.842722	0.00187235		-0.843464	0.00115743		-0.84006	0.0013162		-0.840735	0.0011081		-0.837943	0.0015018		-0.840066	0.00137882		-0.835241	0.00211929		-0.840331	0.00183441		-0.839004	0.0017048		-0.840394	0.0023292		-0.843529	0.000467682		-0.837641	0.000522459
-0.835291	0.00494652		-0.832738	0.00382301		-0.841353	0.00210918		-0.836977	0.0016613		-0.838973	0.00123166		-0.835338	0.00121761		-0.835373	0.00112033		-0.834796	0.00080677		-0.832942	0.00178233		-0.834749	0.000857801		-0.830866	0.00175249		-0.835959	0.00182916		-0.831191	0.00155965		-0.832894	0.0017267		-0.839779	0.000777188		-0.831697	0.000699092
-0.830291	0.00449776		-0.82649	0.00437204		-0.834791	0.00229447		-0.82979	0.0010255		-0.833661	0.000879305		-0.83065	0.00160456		-0.828497	0.00120566		-0.830733	0.000784366		-0.825442	0.00209057		-0.830377	0.00175346		-0.825869	0.00119708		-0.830642	0.00121157		-0.825881	0.00116095		-0.827264	0.00182904		-0.832902	0.00189245		-0.827639	0.00120623
-0.826228	0.00408805		-0.818365	0.0043795		-0.827291	0.00248369		-0.824789	0.00138797		-0.826161	0.00142515		-0.8269	0.00199623		-0.820685	0.000706328		-0.82511	0.000438447		-0.817942	0.00284902		-0.823816	0.00155161		-0.818056	0.00140629		-0.822829	0.00144694		-0.821819	0.000757487		-0.822892	0.00230899		-0.825402	0.0010933		-0.821703	0.00117099
-0.819041	0.00463879		-0.812116	0.00447697		-0.821978	0.00236029		-0.820417	0.00197503		-0.819598	0.00124404		-0.820339	0.00174354		-0.815373	0.000743526		-0.817298	0.00133192		-0.813256	0.00336975		-0.816003	0.00104578		-0.810557	0.00163294		-0.815642	0.00143579		-0.815254	0.000444967		-0.816957	0.00190119		-0.820092	0.00100666		-0.813578	0.000843332
-0.811229	0.00376545		-0.808054	0.00459025		-0.817603	0.00230035		-0.81354	0.0016141		-0.815222	0.0014667		-0.812839	0.00201657		-0.810997	0.000793543		-0.81042	0.00175984		-0.808568	0.00342022		-0.809747	0.00040942		-0.805868	0.0016035		-0.811271	0.00183113		-0.807128	0.000618916		-0.809144	0.00201241		-0.815404	0.00145475		-0.807009	0.000894768
-0.805916	0.00345495		-0.802427	0.00520996		-0.81104	0.00234814		-0.805414	0.0015456		-0.80991	0.00187403		-0.807213	0.00223028		-0.804434	0.000600621		-0.805735	0.00119996		-0.801381	0.0032003		-0.805688	0.00107594		-0.801493	0.00178826		-0.806273	0.00189101		-0.801505	0.00113895		-0.802575	0.00205348		-0.808838	0.001476		-0.802637	0.000989979
-0.801541	0.00423693		-0.794302	0.00419488		-0.803228	0.00328971		-0.799791	0.00162332		-0.802411	0.00168432		-0.802837	0.00136943		-0.796622	0.00110983		-0.800734	0.00117554		-0.793568	0.00267507		-0.800066	0.000468192		-0.793993	0.00209257		-0.798774	0.00154441		-0.797443	0.00163222		-0.798204	0.00249614		-0.801026	0.00142453		-0.797327	0.000673702
-0.794666	0.00435378		-0.787427	0.00390467		-0.796978	0.0021415		-0.795729	0.00185428		-0.794911	0.00147845		-0.796902	0.00157501		-0.790686	0.00188424		-0.792922	0.0010736		-0.788567	0.00159891		-0.79194	0.00117719		-0.786181	0.00215823		-0.791266	0.000772531		-0.790569	0.000867254		-0.792893	0.00179796		-0.794778	0.00141249		-0.789515	0.000904617
-0.786541	0.00364142		-0.783365	0.00417293		-0.792916	0.00234677		-0.789476	0.00178491		-0.790223	0.000962199		-0.789089	0.000928945		-0.786623	0.00157048		-0.785735	0.000272881		-0.784192	0.00153402		-0.785379	0.00112348		-0.78118	0.0019137		-0.786582	0.0011836		-0.782443	0.000357198		-0.785081	0.00139503		-0.790715	0.000920963		-0.782328	0.00166784
-0.781228	0.0043296		-0.778051	0.00395692		-0.786978	0.00358529		-0.781042	0.00250831		-0.785847	0.00246436		-0.782211	0.000958283		-0.780373	0.00127459		-0.781047	0.00121519		-0.777005	0.00218949		-0.781313	0.00134844		-0.776804	0.00167641		-0.781897	0.00105423		-0.776817	0.00106139		-0.777894	0.00183525		-0.784779	0.000441949		-0.777948	0.00189175
-0.777791	0.00452407		-0.769926	0.00478694		-0.779166	0.00253697		-0.775103	0.00280733		-0.77866	0.00184108		-0.778152	0.00133389		-0.771935	0.00167178		-0.776358	0.00127501		-0.76888	0.00276047		-0.77569	0.00129804		-0.769617	0.00177219		-0.774398	0.00126031		-0.77338	0.00093756		-0.773515	0.00258316		-0.776654	0.00124841		-0.772951	0.0023352
-0.77154	0.00435329		-0.762739	0.00514125		-0.772603	0.00165416		-0.771353	0.00194847		-0.770848	0.00150846		-0.772838	0.00173883		-0.76631	0.00121427		-0.768859	0.00121475		-0.764193	0.00272306		-0.767564	0.00137596		-0.761492	0.00154713		-0.766585	0.00165717		-0.76744	0.00194815		-0.768518	0.00184435		-0.770402	0.00114147		-0.765139	0.00274734
-0.764041	0.00430982		-0.758989	0.00456588		-0.768228	0.00260102		-0.765104	0.00142924		-0.765849	0.00116681		-0.764713	0.00204741		-0.762873	0.00166106		-0.761359	0.00153557		-0.760443	0.00260409		-0.761003	0.000798809		-0.756804	0.000855866		-0.762206	0.00203371		-0.759941	0.0011258		-0.760392	0.00206768		-0.766026	0.000831015		-0.757639	0.00184469
-0.758103	0.00417826		-0.754613	0.00388382		-0.762916	0.00233561		-0.756666	0.00165516		-0.761473	0.00129608		-0.757839	0.00236112		-0.756936	0.00114387		-0.756984	0.000912068		-0.75388	0.0031807		-0.757249	0.00139467		-0.753367	0.00158358		-0.758147	0.00104811		-0.754005	0.00128364		-0.753205	0.00208012		-0.760403	0.000911992		-0.753572	0.00135025
-0.753729	0.00430263		-0.747114	0.00461286		-0.754791	0.00201339		-0.750414	0.00173397		-0.754284	0.00171412		-0.753464	0.00242751		-0.749123	0.0010224		-0.752921	0.00117375		-0.746381	0.00324154		-0.752252	0.00178912		-0.746805	0.00183241		-0.751273	0.000981672		-0.749629	0.001009		-0.749139	0.00185634		-0.752278	0.000947641		-0.749514	0.0021752
-0.748103	0.00472753		-0.739927	0.00430969		-0.747916	0.00269778		-0.746977	0.0010356		-0.746161	0.00138296		-0.748463	0.00140734		-0.743185	0.00144145		-0.746047	0.00142288		-0.740756	0.00251937		-0.744752	0.00106009		-0.738993	0.0025925		-0.743773	0.00211457		-0.744003	0.00187353		-0.744767	0.00158262		-0.745717	0.00162803		-0.742327	0.00216294
-0.74029	0.00394767		-0.735239	0.00461373		-0.744166	0.00310324		-0.741667	0.00192695		-0.741473	0.00105999		-0.74065	0.00104244		-0.73881	0.0016598		-0.738547	0.00204751		-0.73638	0.00254708		-0.737878	0.00254655		-0.733679	0.0022094		-0.738769	0.00177715		-0.73619	0.00129249		-0.73758	0.00121299		-0.742276	0.0008898		-0.73514	0.00228004
-0.733415	0.00371463		-0.73055	0.0044098		-0.739478	0.00258202		-0.733854	0.00161783		-0.737723	0.0019309		-0.733463	0.00161977		-0.733185	0.000833892		-0.733546	0.00187074		-0.730443	0.00300382		-0.733186	0.00270878		-0.729304	0.00148169		-0.734397	0.00225269		-0.729003	0.00131018		-0.730393	0.00212252		-0.737279	0.00181171		-0.730135	0.00201979
-0.729041	0.00467393		-0.723363	0.00491843		-0.731978	0.0026016		-0.727602	0.00158293		-0.73116	0.00228661		-0.729401	0.00203541		-0.725686	0.00188214		-0.728858	0.00148539		-0.72263	0.00253176		-0.728502	0.00254017		-0.723368	0.00210321		-0.727836	0.00219346		-0.724628	0.00195041		-0.725389	0.0022919		-0.729779	0.00196799		-0.725763	0.00146078
-0.723728	0.00471086		-0.715551	0.00409588		-0.725103	0.00241141		-0.723227	0.00230852		-0.72366	0.00194035		-0.725025	0.00214698		-0.718497	0.00250714		-0.722297	0.001219		-0.716067	0.00238259		-0.721315	0.00250825		-0.715243	0.00213831		-0.720023	0.0025405		-0.719631	0.00175469		-0.721017	0.00150958		-0.722901	0.0015218		-0.718889	0.00149734
-0.716228	0.00463732		-0.710241	0.00389106		-0.720415	0.00185924		-0.717917	0.00215309		-0.718035	0.00286771		-0.717838	0.00259389		-0.714123	0.00127669		-0.714484	0.00147956		-0.712004	0.00332446		-0.713502	0.00150891		-0.708681	0.00198027		-0.713767	0.00227323		-0.711818	0.00123148		-0.714143	0.00275765		-0.718217	0.00243969		-0.710764	0.00190488
-0.70904	0.00349907		-0.705865	0.0035339		-0.715728	0.0024972		-0.710417	0.0025239		-0.71366	0.00269877		-0.710651	0.00242301		-0.709122	0.00144187		-0.708545	0.00122416		-0.70638	0.00360679		-0.708185	0.00178846		-0.704619	0.00165988		-0.709708	0.00188401		-0.704318	0.00111332		-0.70633	0.00203239		-0.713215	0.00277871		-0.705141	0.00251752
-0.704353	0.00440444		-0.6993	0.00383003		-0.70854	0.00313203		-0.702917	0.00217241		-0.707722	0.00256719		-0.70565	0.00249282		-0.701622	0.00231632		-0.704486	0.00157657		-0.698567	0.00315771		-0.703813	0.00228901		-0.698992	0.00198389		-0.703772	0.00283313		-0.69963	0.00202231		-0.700707	0.0026966		-0.706029	0.00147883		-0.701075	0.00282482
-0.699666	0.00469321		-0.691179	0.00521523		-0.700728	0.00340391		-0.698229	0.00313555		-0.699597	0.00250214		-0.700962	0.00201528		-0.694123	0.0031872		-0.698233	0.00179815		-0.691693	0.00287403		-0.697252	0.0031576		-0.691179	0.0022205		-0.695647	0.00182785		-0.695255	0.00194225		-0.696641	0.00353953		-0.698216	0.0021172		-0.694826	0.00255145
-0.691853	0.00537388		-0.685552	0.00519745		-0.695416	0.00296808		-0.693853	0.00357618		-0.693036	0.00321649		-0.694088	0.00167673		-0.689434	0.00364366		-0.690108	0.00177238		-0.687318	0.00396483		-0.689127	0.00265947		-0.684305	0.00245711		-0.689399	0.00248456		-0.687442	0.00274192		-0.690393	0.0029206		-0.693215	0.00285449		-0.686701	0.00193443
-0.684354	0.00468292		-0.68149	0.00494566		-0.691353	0.0032094		-0.686354	0.0030552		-0.68866	0.00253886		-0.686588	0.0022487		-0.684748	0.00327336		-0.68386	0.00292126		-0.682006	0.00377759		-0.683816	0.00263284		-0.67993	0.00366098		-0.685332	0.00254116		-0.679942	0.00356268		-0.681954	0.00345472		-0.68884	0.00267743		-0.680452	0.00335144
-0.680291	0.00410113		-0.674928	0.00551664		-0.684478	0.00338745		-0.678541	0.00287912		-0.683348	0.00273109		-0.680961	0.00275943		-0.677248	0.00272696		-0.679797	0.003094		-0.67388	0.0037199		-0.67975	0.00310807		-0.674616	0.00342346		-0.679709	0.00213927		-0.675567	0.00386862		-0.676019	0.00392136		-0.681965	0.00283301		-0.676386	0.00341842
-0.676228	0.00397186		-0.66649	0.00456434		-0.676353	0.00327953		-0.67354	0.00345675		-0.675848	0.00276404		-0.67659	0.00360357		-0.669436	0.00335722		-0.673858	0.00373363		-0.667004	0.0052217		-0.672876	0.00417168		-0.666804	0.00338022		-0.671271	0.00310389		-0.671504	0.00432879		-0.671952	0.00459623		-0.674153	0.00228222		-0.67045	0.00326564
-0.669041	0.00430704		-0.660863	0.00526967		-0.670728	0.00352261		-0.669165	0.00309274		-0.66866	0.00310212		-0.670338	0.00339907		-0.66506	0.00369031		-0.665732	0.0042962		-0.662942	0.00499006		-0.664751	0.00438168		-0.659617	0.00368158		-0.66471	0.0042086		-0.66463	0.00452247		-0.666017	0.00448324		-0.668839	0.00338025		-0.662325	0.00396014
-0.661541	0.00514949		-0.657426	0.0063528		-0.666665	0.00365423		-0.661978	0.00383283		-0.664286	0.00416589		-0.662212	0.00444943		-0.661311	0.00456518		-0.659484	0.00473868		-0.658568	0.00430305		-0.659128	0.00473805		-0.655554	0.00383623		-0.661269	0.00525955		-0.657443	0.00585487		-0.657579	0.0038794		-0.664464	0.00430334		-0.656076	0.00384129
-0.656541	0.00492822		-0.651491	0.00632383		-0.660103	0.00356962		-0.654165	0.00584036		-0.659285	0.00475874		-0.656277	0.00521391		-0.654435	0.00492286		-0.655734	0.00469723		-0.651068	0.00589632		-0.655687	0.00390776		-0.651179	0.00512048		-0.656272	0.00448571		-0.65213	0.00504341		-0.65133	0.00451631		-0.65759	0.00409393		-0.652323	0.00522065
-0.652166	0.0052451		-0.643678	0.0074142		-0.651978	0.0039927		-0.649477	0.00552751		-0.651473	0.00484583		-0.652214	0.00501755		-0.646622	0.00520636		-0.650733	0.00481284		-0.644192	0.00602791		-0.649751	0.00479022		-0.643992	0.00501904		-0.648459	0.00494202		-0.647754	0.00471728		-0.647889	0.00500959		-0.649464	0.00549367		-0.647013	0.00628898
-0.645603	0.00563339		-0.637739	0.00661096		-0.646353	0.00525609		-0.645727	0.00493978		-0.643973	0.00508612		-0.645962	0.00526124		-0.64131	0.00535683		-0.643233	0.00491298		-0.639193	0.00637582		-0.641939	0.00531696		-0.636805	0.00619258		-0.641898	0.00617981		-0.641193	0.00624768		-0.642579	0.00542251		-0.644467	0.00542662		-0.639513	0.00567613
-0.637479	0.00595861		-0.633363	0.0066136		-0.642916	0.00659783		-0.639166	0.00542608		-0.63991	0.00574214		-0.637527	0.00594028		-0.637248	0.00668984		-0.636672	0.00551498		-0.634505	0.00805179		-0.636003	0.00590027		-0.632116	0.00656096		-0.637206	0.00714291		-0.633067	0.00702081		-0.634767	0.00617264		-0.641026	0.00588108		-0.632952	0.00571881
-0.631853	0.00673536		-0.62774	0.00802843		-0.63729	0.00684503		-0.631353	0.00599031		-0.635535	0.00714588		-0.631588	0.00645636		-0.630684	0.00705782		-0.632296	0.00672412		-0.627631	0.00809708		-0.631624	0.00629032		-0.627432	0.00707448		-0.632209	0.00824828		-0.627128	0.00713421		-0.628518	0.00697094		-0.634778	0.00676073		-0.628572	0.006964
-0.627478	0.00702642		-0.619928	0.00835003		-0.629478	0.00636631		-0.62604	0.0070483		-0.628348	0.00743338		-0.628151	0.00701334		-0.622872	0.00734006		-0.627295	0.00741462		-0.619818	0.00825143		-0.626001	0.00711775		-0.620241	0.00799759		-0.625022	0.00774214		-0.623065	0.00804342		-0.624139	0.00755102		-0.626965	0.00657517		-0.623575	0.00894068
-0.621541	0.00662342		-0.612741	0.0090479		-0.623228	0.00737957		-0.621664	0.00807951		-0.621161	0.00690538		-0.622524	0.00676922		-0.616623	0.00767589		-0.619796	0.00761536		-0.614192	0.00818856		-0.618501	0.00774244		-0.612429	0.00916139		-0.617522	0.00713592		-0.61713	0.0085698		-0.618829	0.00885547		-0.621029	0.00734976		-0.615763	0.00780843
-0.613416	0.00738857		-0.608366	0.0109057		-0.618853	0.00920845		-0.615416	0.00871158		-0.616473	0.00827701		-0.615024	0.00819583		-0.612561	0.00960447		-0.611983	0.00942224		-0.610131	0.00991501		-0.611314	0.00839399		-0.607119	0.0108595		-0.612517	0.00801662		-0.609004	0.00861244		-0.611329	0.0092544		-0.616654	0.00896529		-0.608263	0.00830418
-0.606853	0.00833022		-0.603365	0.0122854		-0.613541	0.00971615		-0.607603	0.00978538		-0.611784	0.00844364		-0.608776	0.0098807		-0.606936	0.0104667		-0.606982	0.01		-0.603568	0.00956688		-0.606935	0.0100869		-0.602743	0.0113502		-0.608146	0.00964604		-0.602443	0.00901863		-0.604142	0.00950948		-0.610715	0.0100834		-0.603579	0.00926877
-0.602791	0.0098414		-0.595865	0.0135385		-0.605727	0.00947386		-0.601042	0.0108702		-0.60491	0.00869841		-0.604401	0.0100884		-0.598811	0.0110762		-0.60261	0.0109054		-0.595442	0.00962524		-0.601938	0.0102863		-0.596182	0.0119794		-0.601272	0.0107204		-0.59838	0.0107425		-0.59945	0.0108681		-0.602902	0.00979063		-0.598886	0.010194
-0.597166	0.0106381		-0.588365	0.0133763		-0.598541	0.00928033		-0.596979	0.010617		-0.596785	0.0112664		-0.599087	0.0110409		-0.59256	0.0130033		-0.595733	0.0120251		-0.589505	0.0129725		-0.594125	0.0111342		-0.58837	0.0140464		-0.593146	0.0115412		-0.592754	0.011314		-0.594766	0.0114495		-0.596028	0.010731		-0.592012	0.0118914
-0.588729	0.0110094		-0.583677	0.0148043		-0.594165	0.0114304		-0.591353	0.0111887		-0.591473	0.0124746		-0.591274	0.0122309		-0.588185	0.0124882		-0.587607	0.0130118		-0.585755	0.014513		-0.586938	0.0132516		-0.58243	0.0154516		-0.587836	0.0133594		-0.584628	0.0133148		-0.587266	0.0130688		-0.591653	0.0127747		-0.5842	0.0133324
-0.582478	0.0131663		-0.578989	0.0157706		-0.589166	0.0114755		-0.583227	0.0138461		-0.58741	0.0115187		-0.584087	0.013011		-0.58256	0.0130935		-0.582297	0.0137135		-0.579505	0.0146324		-0.582254	0.0151283		-0.578367	0.0163507		-0.58377	0.0140441		-0.578067	0.0150132		-0.579454	0.0148851		-0.586651	0.0127603		-0.57889	0.0147024
-0.57904	0.014416		-0.571489	0.0175356		-0.581666	0.0122067		-0.576353	0.0149829		-0.580847	0.0125105		-0.579399	0.0144811		-0.574435	0.0151553		-0.578234	0.0149159		-0.571068	0.0162198		-0.577562	0.0160898		-0.572119	0.0162028		-0.576896	0.0169362		-0.574317	0.015445		-0.574456	0.0173495		-0.578839	0.0144424		-0.574823	0.0172654
-0.573728	0.0152133		-0.563989	0.020025		-0.574167	0.0141874		-0.57229	0.0169779		-0.573035	0.0156871		-0.574715	0.0155482		-0.567873	0.0175424		-0.57136	0.0169361		-0.565131	0.0184607		-0.570062	0.0177917		-0.563681	0.0185617		-0.56877	0.0179258		-0.569316	0.0192075		-0.570077	0.0177218		-0.571339	0.0169192		-0.567636	0.0172326
-0.566229	0.0165174		-0.559301	0.0223497		-0.569478	0.0175737		-0.566977	0.0189266		-0.567097	0.0163721		-0.567524	0.0168082		-0.564124	0.020394		-0.563235	0.0173815		-0.561692	0.0197462		-0.56225	0.019644		-0.558054	0.0222842		-0.56346	0.0192862		-0.561817	0.0213491		-0.56289	0.0185237		-0.566964	0.0184788		-0.559511	0.0189922
-0.559666	0.0194104		-0.555551	0.0229745		-0.56479	0.0185583		-0.558851	0.0197249		-0.563035	0.0188547		-0.559711	0.0210342		-0.559123	0.0212634		-0.558234	0.0205801		-0.556067	0.0215743		-0.558191	0.0225491		-0.554617	0.0243915		-0.560019	0.0216995		-0.554942	0.0214498		-0.554765	0.0202393		-0.562279	0.019828		-0.554514	0.0237564
-0.554978	0.0207081		-0.548677	0.0238827		-0.55729	0.019466		-0.551977	0.0217146		-0.556786	0.0227834		-0.554714	0.0234324		-0.551623	0.0227912		-0.554484	0.024016		-0.548567	0.0252047		-0.554124	0.0232414		-0.548681	0.0249544		-0.553771	0.0225402		-0.550567	0.0254123		-0.55008	0.0241613		-0.554467	0.0225897		-0.551073	0.0252566
-0.549978	0.0229147		-0.541177	0.0273687		-0.549478	0.0237566		-0.547915	0.0251044		-0.548348	0.0242852		-0.550339	0.0257398		-0.544747	0.0261716		-0.548236	0.0247952		-0.542317	0.0278559		-0.54725	0.0250462		-0.541182	0.0298842		-0.546271	0.0247881		-0.545566	0.0289725		-0.54664	0.0259479		-0.546963	0.026521		-0.544512	0.0280898
-0.542791	0.0251305		-0.535863	0.0316101		-0.545415	0.0255385		-0.543539	0.0283506		-0.54241	0.027156		-0.543152	0.027484		-0.54006	0.0286461		-0.540732	0.0271978		-0.537631	0.0306639		-0.539751	0.0300922		-0.534929	0.0333697		-0.540336	0.0313342		-0.538066	0.0326336		-0.540078	0.0282611		-0.542592	0.0288568		-0.537012	0.031972
-0.535291	0.0272555		-0.531488	0.0328796		-0.541353	0.0281193		-0.536039	0.0316201		-0.538973	0.029834		-0.535026	0.0312531		-0.535372	0.0317795		-0.534797	0.0318137		-0.53263	0.0328387		-0.534441	0.0323048		-0.530554	0.0365641		-0.535956	0.0336043		-0.530567	0.0353919		-0.532266	0.0334082		-0.538529	0.0303585		-0.531389	0.0368251
-0.53029	0.0312027		-0.524927	0.0388013		-0.534478	0.030245		-0.529165	0.0391404		-0.533349	0.0314162		-0.530338	0.0345311		-0.528185	0.0356657		-0.530734	0.0374062		-0.524817	0.0366267		-0.530061	0.0362953		-0.524931	0.0408884		-0.530021	0.0365762		-0.525566	0.0396379		-0.526956	0.0377677		-0.531338	0.0340478		-0.52701	0.0401838
-0.525603	0.0369495		-0.517114	0.0438108		-0.526979	0.0350596		-0.524477	0.0442097		-0.525847	0.034512		-0.526588	0.0377557		-0.520373	0.0404728		-0.524798	0.0427704		-0.51763	0.0433236		-0.5235	0.0387146		-0.517431	0.0465297		-0.522208	0.0406301		-0.521194	0.043804		-0.522576	0.0408852		-0.524151	0.0402471		-0.521074	0.0442466
-0.518728	0.0398341		-0.511179	0.0536947		-0.521978	0.0415741		-0.519789	0.0473033		-0.519286	0.0402724		-0.520027	0.0400868		-0.515372	0.0466284		-0.516986	0.0460945		-0.512942	0.0477362		-0.515688	0.045034		-0.510245	0.0540405		-0.515334	0.0478578		-0.514003	0.0473189		-0.516328	0.0441963		-0.518841	0.0421166		-0.512949	0.0481581
-0.510916	0.0473714		-0.507116	0.0605726		-0.517291	0.0440858		-0.512602	0.0506181		-0.51491	0.0483104		-0.512527	0.0465423		-0.510998	0.0528366		-0.510108	0.0486737		-0.508256	0.0547039		-0.509439	0.0510498		-0.505556	0.0602519		-0.510955	0.0545215		-0.505878	0.0559172		-0.508515	0.0522706		-0.514466	0.0477626		-0.506388	0.0554312
-0.505604	0.055677		-0.501176	0.0632172		-0.510728	0.0490622		-0.504789	0.0547951		-0.509598	0.050483		-0.507213	0.0525282		-0.504122	0.0545678		-0.505732	0.0604183		-0.500756	0.0624245		-0.505373	0.057015		-0.500868	0.0655745		-0.505958	0.0588442		-0.500568	0.0660544		-0.502267	0.0588073		-0.507901	0.0538274		-0.502321	0.0635756
-0.501228	0.0613177		-0.493051	0.068104		-0.502916	0.053234		-0.499479	0.0654124		-0.502099	0.0554709		-0.502838	0.0604652		-0.495997	0.0587003		-0.500422	0.0628906		-0.493254	0.0688064		-0.499437	0.0593787		-0.493368	0.0713697		-0.498145	0.0618359		-0.496505	0.0712657		-0.497888	0.0651635		-0.499779	0.0594473		-0.497011	0.0689396
-0.494353	0.0632829		-0.486803	0.0771464		-0.496978	0.0595826		-0.495417	0.0722084		-0.49491	0.0657131		-0.49659	0.0652919		-0.490685	0.0725873		-0.49261	0.0681916		-0.488255	0.0748737		-0.491312	0.0670212		-0.485869	0.0787714		-0.490958	0.0724855		-0.489631	0.0763249		-0.492265	0.0698053		-0.49384	0.0654989		-0.488886	0.0745199
-0.486228	0.0704139		-0.482427	0.0867221		-0.492915	0.0704499		-0.488539	0.076645		-0.490223	0.0729057		-0.488464	0.0722556		-0.486622	0.0833527		-0.485423	0.0806599		-0.48388	0.0854629		-0.485063	0.0808118		-0.480868	0.090055		-0.486579	0.0828606		-0.481506	0.0846639		-0.484452	0.0786636		-0.489777	0.0735057		-0.482012	0.0840896
-0.481229	0.0851458		-0.476801	0.089825		-0.486978	0.077826		-0.480417	0.0832243		-0.485535	0.0752547		-0.482212	0.0799589		-0.480061	0.0845882		-0.481047	0.0903658		-0.47638	0.0896553		-0.481004	0.0907687		-0.476492	0.0978348		-0.481894	0.0888265		-0.476192	0.0928007		-0.477578	0.0899023		-0.483529	0.0799371		-0.47764	0.0955961
-0.477478	0.0907911		-0.468675	0.0988977		-0.478853	0.0807412		-0.474791	0.0978048		-0.478035	0.0850966		-0.477837	0.0923307		-0.471623	0.093609		-0.476359	0.0939106		-0.468568	0.0990764		-0.475374	0.0929357		-0.468992	0.104978		-0.473769	0.0936463		-0.472755	0.10187		-0.473207	0.101619		-0.475403	0.0876235		-0.472635	0.100574
-0.471228	0.093398		-0.462114	0.112526		-0.472291	0.0948363		-0.470728	0.106143		-0.470536	0.095153		-0.472526	0.0982191		-0.465998	0.105525		-0.468547	0.101394		-0.463879	0.111725		-0.466936	0.100726		-0.46118	0.118592		-0.466269	0.105778		-0.466506	0.10815		-0.468202	0.10572		-0.469464	0.101571		-0.46451	0.107
-0.463729	0.105		-0.458364	0.120451		-0.468229	0.103836		-0.464167	0.108811		-0.465535	0.10738		-0.464401	0.104205		-0.462561	0.115568		-0.461047	0.110544		-0.460129	0.12158		-0.460374	0.115149		-0.456804	0.127544		-0.462211	0.115105		-0.459003	0.117753		-0.460076	0.111521		-0.465401	0.111625		-0.457323	0.12061
-0.457791	0.120185		-0.453363	0.129722		-0.462604	0.107253		-0.456041	0.120481		-0.461161	0.117823		-0.457527	0.117946		-0.456623	0.120094		-0.457297	0.123877		-0.453568	0.12691		-0.456941	0.12599		-0.452742	0.136914		-0.458144	0.125272		-0.453067	0.129054		-0.45289	0.122284		-0.459466	0.116478		-0.453264	0.132216
-0.453416	0.130288		-0.445863	0.134906		-0.454479	0.118324		-0.450415	0.135965		-0.45366	0.122296		-0.453464	0.129349		-0.449122	0.127027		-0.452922	0.13007		-0.445756	0.136893		-0.451936	0.127012		-0.446181	0.145626		-0.450957	0.130791		-0.448692	0.142544		-0.449143	0.137907		-0.45134	0.125399		-0.448885	0.136524
-0.447791	0.137578		-0.438989	0.14856		-0.447915	0.130917		-0.446665	0.14469		-0.445847	0.134223		-0.448151	0.137484		-0.443184	0.141689		-0.445735	0.141041		-0.440442	0.150031		-0.444437	0.134185		-0.438681	0.155451		-0.44377	0.143804		-0.443069	0.152409		-0.444451	0.142027		-0.445092	0.14167		-0.441698	0.145394
-0.439978	0.14595		-0.434614	0.165191		-0.444478	0.143643		-0.441042	0.150438		-0.441161	0.1455		-0.440025	0.14492		-0.438811	0.157366		-0.438548	0.155997		-0.436379	0.162503		-0.437562	0.152025		-0.433367	0.168405		-0.438773	0.16087		-0.435256	0.165354		-0.437265	0.150929		-0.441342	0.14653		-0.434511	0.163752
-0.433103	0.159616		-0.429613	0.171108		-0.439477	0.149059		-0.43323	0.163482		-0.437411	0.152515		-0.432838	0.162381		-0.433186	0.162613		-0.433547	0.168796		-0.429818	0.170837		-0.433191	0.167447		-0.428991	0.180777		-0.434394	0.167847		-0.428378	0.181078		-0.430078	0.168568		-0.436341	0.154294		-0.429827	0.17616
-0.429041	0.17659		-0.422426	0.182369		-0.431978	0.161155		-0.426977	0.17929		-0.430848	0.161547		-0.429089	0.175206		-0.425373	0.172584		-0.429171	0.177324		-0.422005	0.182577		-0.428186	0.173956		-0.422743	0.188943		-0.42752	0.176054		-0.424003	0.190845		-0.42508	0.177306		-0.428528	0.169546		-0.425135	0.18632
-0.423728	0.182951		-0.414613	0.196771		-0.425103	0.176256		-0.422602	0.190342		-0.423348	0.176009		-0.424713	0.181401		-0.418497	0.190376		-0.422297	0.189954		-0.415755	0.192421		-0.420686	0.187207		-0.414618	0.204495		-0.419707	0.189089		-0.418693	0.197552		-0.420388	0.186829		-0.421963	0.18506		-0.418261	0.19519
-0.415915	0.191076		-0.409616	0.214469		-0.420415	0.183797		-0.417292	0.196623		-0.418036	0.193428		-0.417213	0.189472		-0.414122	0.206393		-0.414172	0.200207		-0.411692	0.212575		-0.413187	0.19759		-0.408369	0.219512		-0.413772	0.204555		-0.41088	0.212533		-0.413514	0.196656		-0.417279	0.19845		-0.410448	0.206857
-0.408728	0.209012		-0.405241	0.221238		-0.415729	0.201266		-0.409479	0.205063		-0.413661	0.203573		-0.410339	0.205024		-0.409123	0.215759		-0.408545	0.219366		-0.405755	0.222142		-0.408189	0.212582		-0.404307	0.226513		-0.409705	0.217779		-0.403694	0.228879		-0.405702	0.208601		-0.412278	0.204964		-0.404825	0.221839
-0.404353	0.229542		-0.398363	0.235948		-0.40854	0.215403		-0.402292	0.225044		-0.407097	0.208192		-0.405651	0.220862		-0.40131	0.224979		-0.404483	0.232424		-0.397942	0.22779		-0.40381	0.222993		-0.39868	0.232723		-0.403769	0.224429		-0.399005	0.242029		-0.400392	0.225225		-0.404778	0.219477		-0.400759	0.234484
-0.399353	0.236224		-0.390241	0.249824		-0.400728	0.223027		-0.397917	0.239765		-0.399285	0.225288		-0.400963	0.230598		-0.394123	0.237819		-0.398234	0.241147		-0.391381	0.246667		-0.396936	0.234449		-0.390555	0.252326		-0.395644	0.235908		-0.394317	0.249314		-0.396325	0.238079		-0.397278	0.23428		-0.39451	0.243147
-0.39154	0.246323		-0.384927	0.265701		-0.395728	0.240121		-0.393229	0.251462		-0.393034	0.237648		-0.393776	0.233591		-0.389435	0.254914		-0.390109	0.252866		-0.387318	0.261554		-0.389123	0.250872		-0.383681	0.273829		-0.389396	0.253806		-0.386505	0.261564		-0.389764	0.250082		-0.39259	0.25132		-0.386385	0.257823
-0.384041	0.262795		-0.380552	0.273872		-0.391353	0.25248		-0.385729	0.264002		-0.388972	0.250108		-0.385963	0.250717		-0.384747	0.269317		-0.384173	0.274889		-0.381692	0.273195		-0.383813	0.268861		-0.379618	0.285995		-0.385329	0.269472		-0.379005	0.273777		-0.381639	0.263218		-0.387902	0.2624		-0.380136	0.276717
-0.379978	0.271554		-0.373678	0.28299		-0.384479	0.259035		-0.378229	0.277983		-0.383347	0.262812		-0.380649	0.269804		-0.376934	0.276554		-0.380111	0.286689		-0.373568	0.28409		-0.379442	0.284752		-0.374304	0.295697		-0.379393	0.272318		-0.374942	0.291466		-0.375703	0.284766		-0.380715	0.268839		-0.37639	0.288474
-0.375915	0.283897		-0.365552	0.298979		-0.376354	0.269357		-0.373228	0.295841		-0.375535	0.275626		-0.376587	0.284049		-0.369435	0.297541		-0.373858	0.292372		-0.366692	0.300155		-0.37256	0.290703		-0.365866	0.303768		-0.371268	0.286176		-0.37088	0.307023		-0.371957	0.302325		-0.372903	0.284392		-0.370134	0.299011
-0.368728	0.293844		-0.360239	0.319544		-0.371042	0.292261		-0.368853	0.30638		-0.36866	0.293588		-0.370026	0.290709		-0.365372	0.312817		-0.365733	0.305532		-0.362942	0.321773		-0.364435	0.309038		-0.359305	0.319819		-0.36502	0.300951		-0.363693	0.316079		-0.365701	0.305733		-0.367901	0.300567		-0.361696	0.314554
-0.361541	0.3108		-0.356802	0.331314		-0.366979	0.306966		-0.361353	0.314139		-0.364285	0.309281		-0.3619	0.306571		-0.361309	0.317161		-0.359484	0.321327		-0.358567	0.33467		-0.359437	0.325968		-0.355555	0.336196		-0.361274	0.321401		-0.356506	0.326202		-0.357263	0.317511		-0.363526	0.313441		-0.355761	0.330851
-0.356541	0.326066		-0.350553	0.336242		-0.360103	0.314237		-0.353541	0.328256		-0.359286	0.317391		-0.355965	0.327565		-0.354123	0.320389		-0.356047	0.343234		-0.351067	0.34073		-0.356004	0.334454		-0.350866	0.34973		-0.356269	0.330054		-0.351505	0.344643		-0.35164	0.337896		-0.356339	0.322752		-0.352327	0.344491
-0.351853	0.334042		-0.342741	0.353564		-0.351978	0.329215		-0.348852	0.344658		-0.351161	0.330641		-0.351902	0.333133		-0.346936	0.345619		-0.350734	0.346524		-0.34388	0.35884		-0.349748	0.342708		-0.343367	0.361083		-0.348456	0.340999		-0.347129	0.355485		-0.348207	0.349353		-0.348527	0.342426		-0.346697	0.350031
-0.344978	0.342862		-0.336801	0.367004		-0.346666	0.34691		-0.345102	0.362658		-0.343974	0.349619		-0.34565	0.345281		-0.341935	0.363593		-0.343234	0.356555		-0.339192	0.367033		-0.342248	0.356632		-0.336493	0.3793		-0.341895	0.356738		-0.340255	0.361224		-0.342263	0.354839		-0.343529	0.354482		-0.338884	0.364238
-0.337166	0.361413		-0.332426	0.381665		-0.343229	0.359941		-0.338541	0.367367		-0.340222	0.364741		-0.337212	0.357631		-0.337248	0.374964		-0.336673	0.371826		-0.334506	0.377563		-0.336313	0.376665		-0.331804	0.39076		-0.337523	0.373984		-0.332443	0.379137		-0.334451	0.372977		-0.339779	0.366126		-0.332949	0.379797
-0.331541	0.376999		-0.326803	0.390297		-0.336978	0.365229		-0.330729	0.380604		-0.335848	0.374134		-0.331589	0.37658		-0.330685	0.385861		-0.332297	0.390433		-0.327317	0.398209		-0.331941	0.387285		-0.327116	0.405479		-0.332518	0.378935		-0.326503	0.396593		-0.328515	0.392471		-0.333527	0.379255		-0.328577	0.39348
-0.327165	0.391999		-0.31899	0.407271		-0.329166	0.38005		-0.325415	0.398712		-0.328349	0.390387		-0.328152	0.392444		-0.322873	0.400107		-0.326983	0.4034		-0.319817	0.413673		-0.326311	0.39349		-0.319929	0.414244		-0.325019	0.394507		-0.32244	0.40898		-0.324143	0.405946		-0.325715	0.395379		-0.322947	0.405104
-0.320916	0.401711		-0.311803	0.427642		-0.323228	0.398143		-0.321039	0.415292		-0.321473	0.406759		-0.322525	0.404154		-0.316935	0.421803		-0.319484	0.411945		-0.314505	0.429649		-0.318498	0.411169		-0.312117	0.432161		-0.317519	0.41611		-0.316192	0.425394		-0.318513	0.408769		-0.320092	0.409155		-0.315447	0.419637
-0.312791	0.416933		-0.307428	0.442687		-0.319166	0.414272		-0.314791	0.42689		-0.316784	0.415675		-0.314712	0.416039		-0.312872	0.435439		-0.311984	0.428922		-0.31013	0.449305		-0.311624	0.431288		-0.306807	0.455652		-0.312522	0.428636		-0.308067	0.439258		-0.311013	0.424175		-0.315716	0.4258		-0.30826	0.445281
-0.306853	0.434425		-0.302427	0.452569		-0.313541	0.423927		-0.306978	0.441853		-0.312098	0.432614		-0.308464	0.434777		-0.306935	0.444261		-0.307296	0.452704		-0.303567	0.456912		-0.307252	0.447337		-0.302431	0.475546		-0.308143	0.445636		-0.301818	0.457798		-0.303826	0.446371		-0.309777	0.440749		-0.303576	0.455276
-0.30279	0.45059		-0.294614	0.473061		-0.305728	0.440589		-0.30073	0.462968		-0.304911	0.447133		-0.304089	0.446889		-0.298809	0.45676		-0.30292	0.462585		-0.295443	0.473819		-0.302248	0.456653		-0.295866	0.480763		-0.301268	0.46264		-0.297756	0.476265		-0.299455	0.462679		-0.301652	0.457251		-0.298891	0.465618
-0.296541	0.463533		-0.287427	0.491972		-0.298852	0.464049		-0.296354	0.480834		-0.297099	0.461768		-0.298775	0.45691		-0.292561	0.475464		-0.29542	0.469038		-0.289818	0.493232		-0.294435	0.474733		-0.288054	0.49453		-0.293456	0.469939		-0.291816	0.484865		-0.294458	0.474913		-0.29509	0.466607		-0.291384	0.479584
-0.288416	0.481052		-0.282739	0.513805		-0.294479	0.483524		-0.290728	0.489039		-0.291785	0.486613		-0.290962	0.471651		-0.288498	0.493962		-0.287608	0.486437		-0.285756	0.504496		-0.287248	0.493261		-0.282118	0.513554		-0.288146	0.487003		-0.283378	0.497303		-0.28695	0.478521		-0.291028	0.485484		-0.283884	0.503913
-0.282165	0.498079		-0.278051	0.51882		-0.289165	0.485865		-0.282915	0.499828		-0.287722	0.495197		-0.283775	0.498543		-0.282561	0.502396		-0.282611	0.510759		-0.279193	0.510218		-0.282564	0.506414		-0.278055	0.527723		-0.284079	0.505385		-0.27713	0.521681		-0.279451	0.499124		-0.285714	0.494077		-0.278887	0.518143
-0.278728	0.519122		-0.270238	0.522674		-0.281352	0.502921		-0.276041	0.522125		-0.281161	0.509733		-0.279087	0.518805		-0.274435	0.516947		-0.278235	0.521737		-0.271067	0.532055		-0.277879	0.514506		-0.271494	0.539804		-0.276893	0.506974		-0.273692	0.543711		-0.274766	0.532794		-0.277901	0.504166		-0.274202	0.52838
-0.273415	0.525447		-0.262739	0.545517		-0.274165	0.528787		-0.271978	0.541437		-0.273036	0.525613		-0.274399	0.516592		-0.267872	0.542736		-0.271045	0.538701		-0.265443	0.557238		-0.270067	0.531765		-0.263369	0.559541		-0.268767	0.521621		-0.268691	0.548735		-0.270082	0.548686		-0.270714	0.536809		-0.267015	0.528928
-0.265603	0.541653		-0.258676	0.573253		-0.26979	0.546706		-0.266352	0.555954		-0.267411	0.546678		-0.266899	0.525968		-0.264435	0.560272		-0.263232	0.565684		-0.261693	0.57198		-0.262567	0.553762		-0.257742	0.577066		-0.26377	0.559447		-0.261192	0.557274		-0.262895	0.551459		-0.266339	0.553998		-0.259203	0.551473
-0.259041	0.565662		-0.254613	0.5867		-0.265104	0.557069		-0.258226	0.566713		-0.263348	0.560637		-0.259399	0.547526		-0.259436	0.560245		-0.258235	0.581742		-0.256068	0.578995		-0.258501	0.570411		-0.254305	0.594135		-0.260016	0.572546		-0.25463	0.580379		-0.255082	0.563629		-0.261342	0.55736		-0.254511	0.576067
-0.254666	0.577772		-0.247427	0.590295		-0.257291	0.568317		-0.251352	0.585113		-0.256785	0.569109		-0.254715	0.573458		-0.251624	0.579837		-0.254798	0.58683		-0.248255	0.582009		-0.254442	0.575254		-0.248369	0.604528		-0.253768	0.580278		-0.249942	0.597382		-0.25039	0.594466		-0.253529	0.576806		-0.250765	0.591583
-0.249666	0.585046		-0.24024	0.612232		-0.249791	0.598998		-0.247603	0.597387		-0.24866	0.585361		-0.250027	0.580968		-0.24506	0.597687		-0.248233	0.593335		-0.242318	0.602502		-0.247247	0.590831		-0.240557	0.619214		-0.245955	0.600136		-0.244941	0.608547		-0.246644	0.609468		-0.246338	0.595711		-0.244204	0.607547
-0.242165	0.605307		-0.234926	0.618074		-0.245416	0.608752		-0.242914	0.606046		-0.243035	0.608953		-0.242527	0.59309		-0.240372	0.614164		-0.24042	0.61415		-0.237942	0.628293		-0.24006	0.616733		-0.234617	0.641293		-0.240333	0.61233		-0.237441	0.628869		-0.23977	0.614259		-0.242276	0.609175		-0.236391	0.6224
-0.234666	0.625056		-0.23055	0.637363		-0.241353	0.612438		-0.235102	0.620439		-0.239285	0.620647		-0.234714	0.611952		-0.235373	0.625596		-0.23511	0.645057		-0.232318	0.641944		-0.235063	0.633891		-0.230555	0.653133		-0.235961	0.638032		-0.229942	0.639884		-0.232263	0.632548		-0.237591	0.620112		-0.231073	0.641779
-0.229978	0.646243		-0.223989	0.642819		-0.234477	0.621719		-0.228228	0.647059		-0.23366	0.63159		-0.230026	0.62835		-0.227873	0.636808		-0.230735	0.655119		-0.224818	0.652567		-0.230691	0.642894		-0.224932	0.662382		-0.230018	0.646048		-0.224941	0.652844		-0.226953	0.643198		-0.230404	0.626031		-0.226702	0.651518
-0.225291	0.658254		-0.215864	0.666403		-0.226978	0.643979		-0.223852	0.661807		-0.225848	0.643832		-0.226276	0.633119		-0.220374	0.652637		-0.224482	0.665159		-0.217629	0.677947		-0.22381	0.653003		-0.217119	0.671818		-0.222205	0.656685		-0.220256	0.670456		-0.222581	0.658793		-0.223214	0.650372		-0.220453	0.665436
-0.218103	0.674436		-0.210241	0.69419		-0.221978	0.665765		-0.218855	0.66821		-0.219597	0.657643		-0.219402	0.653862		-0.215372	0.676826		-0.21667	0.676481		-0.213256	0.695774		-0.215692	0.678804		-0.209929	0.699359		-0.215331	0.676429		-0.213378	0.686451		-0.21602	0.668077		-0.218217	0.675404		-0.212641	0.684631
-0.210291	0.689713		-0.206178	0.708027		-0.217603	0.678956		-0.211664	0.682134		-0.215222	0.679895		-0.211899	0.669263		-0.210997	0.692154		-0.210109	0.704547		-0.208255	0.702587		-0.210062	0.702087		-0.205557	0.720135		-0.211272	0.694035		-0.205566	0.698371		-0.208207	0.692131		-0.213841	0.695523		-0.206385	0.702766
-0.205291	0.709905		-0.199926	0.718785		-0.210729	0.684745		-0.203852	0.712393		-0.20991	0.692644		-0.206901	0.692898		-0.204123	0.708499		-0.205733	0.72497		-0.200442	0.710222		-0.20569	0.714658		-0.200556	0.734839		-0.205954	0.700788		-0.200256	0.728728		-0.201951	0.709208		-0.206967	0.697487		-0.202326	0.721226
-0.200916	0.727419		-0.191801	0.730864		-0.202916	0.702853		-0.198855	0.730323		-0.202097	0.710425		-0.202213	0.70571		-0.195998	0.723677		-0.200423	0.728705		-0.192942	0.737996		-0.199441	0.720749		-0.193056	0.744591		-0.198142	0.707067		-0.196193	0.740039		-0.197892	0.733027		-0.199154	0.708081		-0.196703	0.737134
-0.193728	0.730936		-0.185552	0.74729		-0.196979	0.728075		-0.194479	0.730803		-0.194911	0.731561		-0.195965	0.721946		-0.190686	0.749313		-0.192611	0.736146		-0.188256	0.749224		-0.191316	0.733046		-0.185557	0.757698		-0.191268	0.72548		-0.189006	0.741253		-0.192269	0.743467		-0.193528	0.730106		-0.188578	0.741023
-0.185916	0.749119		-0.18149	0.765825		-0.192916	0.74642		-0.187605	0.740006		-0.190535	0.74591		-0.188152	0.729509		-0.186623	0.762988		-0.185733	0.755011		-0.183881	0.761101		-0.185373	0.756249		-0.180868	0.779357		-0.186896	0.75644		-0.180881	0.767865		-0.184144	0.751141		-0.189465	0.742163		-0.181704	0.760976
-0.180916	0.770313		-0.175554	0.776255		-0.186979	0.756614		-0.17948	0.759254		-0.185536	0.757822		-0.1819	0.75226		-0.179747	0.760591		-0.181357	0.77717		-0.176381	0.76708		-0.181314	0.772127		-0.17618	0.797071		-0.181586	0.763832		-0.17588	0.782045		-0.177575	0.764437		-0.182904	0.74839		-0.177637	0.774725
-0.177166	0.777297		-0.167429	0.794667		-0.178853	0.775476		-0.173853	0.782974		-0.178034	0.769199		-0.177837	0.777282		-0.171622	0.773649		-0.17636	0.783398		-0.168568	0.795133		-0.175066	0.782974		-0.16868	0.812388		-0.173774	0.77968		-0.17213	0.786369		-0.173516	0.788068		-0.174779	0.777434		-0.172014	0.784479
-0.170604	0.778762		-0.161176	0.815673		-0.17229	0.792		-0.16979	0.797346		-0.170535	0.78895		-0.171902	0.778565		-0.16631	0.803919		-0.168235	0.794077		-0.16388	0.814694		-0.16694	0.787413		-0.160868	0.81354		-0.166579	0.801066		-0.165878	0.796089		-0.167893	0.798775		-0.168839	0.804503		-0.163889	0.802226
-0.162791	0.798167		-0.157426	0.826231		-0.168227	0.809082		-0.163229	0.812494		-0.165848	0.801055		-0.164089	0.789579		-0.162873	0.818657		-0.161048	0.816152		-0.16013	0.831549		-0.161005	0.809674		-0.156492	0.823998		-0.16252	0.817542		-0.158378	0.821182		-0.159768	0.802588		-0.164776	0.81777		-0.157015	0.821467
-0.157478	0.810856		-0.152425	0.835332		-0.162603	0.811977		-0.154791	0.828562		-0.16116	0.812461		-0.157211	0.813042		-0.156622	0.823365		-0.157298	0.838987		-0.153254	0.83708		-0.157251	0.832724		-0.15243	0.848925		-0.158149	0.827614		-0.152755	0.840075		-0.152894	0.824385		-0.158528	0.820506		-0.153261	0.83137
-0.153104	0.82816		-0.144613	0.843331		-0.154167	0.83027		-0.149477	0.843726		-0.15366	0.822525		-0.153152	0.821991		-0.14881	0.833362		-0.152922	0.850497		-0.145755	0.859381		-0.152254	0.837233		-0.145556	0.858306		-0.150954	0.839938		-0.14838	0.853923		-0.14914	0.846589		-0.15009	0.843709		-0.148577	0.832985
-0.147166	0.8455		-0.138052	0.865928		-0.147916	0.853025		-0.145727	0.857912		-0.146161	0.838473		-0.147526	0.828527		-0.143185	0.848795		-0.145423	0.866754		-0.140443	0.874356		-0.144441	0.849101		-0.138056	0.868486		-0.143454	0.854867		-0.14244	0.859532		-0.144456	0.853821		-0.144154	0.859952		-0.14139	0.854961
-0.139041	0.858401		-0.133363	0.875658		-0.144479	0.862344		-0.139792	0.865416		-0.141785	0.857697		-0.1394	0.84433		-0.13881	0.855974		-0.138545	0.879378		-0.13638	0.879317		-0.137872	0.861004		-0.132742	0.882774		-0.13877	0.861923		-0.134319	0.863645		-0.136956	0.858253		-0.140713	0.873431		-0.134203	0.872436
-0.13279	0.867334		-0.128366	0.890826		-0.139165	0.86021		-0.131979	0.875425		-0.138035	0.862343		-0.132839	0.855644		-0.132872	0.865331		-0.133548	0.878502		-0.129817	0.889693		-0.133501	0.869891		-0.128679	0.90285		-0.134398	0.866219		-0.127754	0.87502		-0.130082	0.868275		-0.135403	0.880484		-0.129511	0.874489
-0.128416	0.876434		-0.120866	0.896543		-0.131353	0.877648		-0.12604	0.888228		-0.130848	0.868175		-0.129089	0.861811		-0.12506	0.881904		-0.128859	0.889077		-0.122004	0.897299		-0.128503	0.87457		-0.122118	0.915282		-0.127517	0.873914		-0.123691	0.908287		-0.12539	0.892205		-0.127591	0.894352		-0.124826	0.883005
-0.123103	0.886444		-0.113363	0.902186		-0.124791	0.889149		-0.121664	0.889347		-0.123347	0.895786		-0.124088	0.878869		-0.118498	0.907351		-0.121985	0.913716		-0.115756	0.895538		-0.121004	0.896814		-0.114306	0.91271		-0.119391	0.893709		-0.118381	0.919834		-0.120706	0.903946		-0.121338	0.891645		-0.11764	0.88984
-0.114979	0.90003		-0.108366	0.916492		-0.120416	0.904398		-0.116041	0.898765		-0.118348	0.896851		-0.116589	0.890914		-0.114123	0.907239		-0.114173	0.918112		-0.111693	0.910185		-0.113504	0.908373		-0.108053	0.927234		-0.113768	0.899664		-0.110256	0.915603		-0.113519	0.908729		-0.116967	0.921954		-0.11014	0.908076
-0.108104	0.914813		-0.103677	0.919198		-0.115415	0.918044		-0.108229	0.902485		-0.113972	0.913892		-0.109714	0.906407		-0.108811	0.919085		-0.108546	0.929606		-0.106068	0.916181		-0.108499	0.925406		-0.103995	0.938694		-0.10971	0.909871		-0.103378	0.921889		-0.105706	0.907776		-0.111653	0.933055		-0.104509	0.917497
-0.103728	0.929101		-0.0968033	0.927685		-0.107915	0.922239		-0.101355	0.916646		-0.107411	0.922624		-0.105339	0.912242		-0.100998	0.920446		-0.104483	0.939491		-0.097943	0.939489		-0.104127	0.931938		-0.098055	0.938391		-0.103461	0.91926		-0.099006	0.934528		-0.100389	0.918297		-0.104153	0.933208		-0.100451	0.918919
-0.098728	0.925129		-0.0889908	0.940052		-0.100728	0.928072		-0.0969792	0.932149		-0.0995984	0.925744		-0.100338	0.91592		-0.0938095	0.923918		-0.0979222	0.943431		-0.0913798	0.954958		-0.0969406	0.942463		-0.0899297	0.946685		-0.0953359	0.929077		-0.0936922	0.947764		-0.0963298	0.944744		-0.0966536	0.938995		-0.0938892	0.93096
-0.0906036	0.935846		-0.0836769	0.948543		-0.0957273	0.938823		-0.0919781	0.934325		-0.093348	0.926297		-0.093151	0.921527		-0.089436	0.928097		-0.0897968	0.952714		-0.0873172	0.955444		-0.0891281	0.948603		-0.0833685	0.95414		-0.0893926	0.937517		-0.0858797	0.949169		-0.0897685	0.952606		-0.0919653	0.95062		-0.0857639	0.952917
-0.0834158	0.941247		-0.0796142	0.946306		-0.0910409	0.957045		-0.0841656	0.938845		-0.0892854	0.944671		-0.0853385	0.934094		-0.0847477	0.954422		-0.0838574	0.964411		-0.0816924	0.951386		-0.0838104	0.95648		-0.0796186	0.97393		-0.0853337	0.940608		-0.0786928	0.949053		-0.0816432	0.948454		-0.0872771	0.954813		-0.0798283	0.96003
-0.0796659	0.94994		-0.0724273	0.945316		-0.0841649	0.958508		-0.0769788	0.951975		-0.0833478	0.959957		-0.0803374	0.936226		-0.0769352	0.965482		-0.0797947	0.96277		-0.0735671	0.95429		-0.0797515	0.970679		-0.0736791	0.975542		-0.0790853	0.942611		-0.0746301	0.966021		-0.0760127	0.953896		-0.0797774	0.952692		-0.0757618	0.962937
-0.0752905	0.958547		-0.064302	0.956943		-0.0763524	0.961297		-0.0722905	0.959764		-0.0755353	0.957982		-0.075962	0.944356		-0.0694355	0.962679		-0.0735462	0.974668		-0.0670058	0.97422		-0.0725646	0.962934		-0.0655538	0.972929		-0.07096	0.955269		-0.0702547	0.973622		-0.0719538	0.968161		-0.0722777	0.966618		-0.0695133	0.958988
-0.0677908	0.967757		-0.059301	0.977661		-0.0710405	0.970935		-0.0672894	0.965287		-0.0686593	0.969909		-0.0690879	0.950673		-0.0653729	0.970742		-0.0651081	0.973073		-0.063256	0.983272		-0.0644393	0.967704		-0.0589925	0.981308		-0.0650167	0.962073		-0.0630678	0.972809		-0.0653926	0.967864		-0.0672766	0.975373		-0.0610752	0.967549
-0.0609158	0.965845		-0.0555511	0.973191		-0.066665	0.982029		-0.0597897	0.96582		-0.0645986	0.974769		-0.0609626	0.95019		-0.0613102	0.973636		-0.0594853	0.988241		-0.0582549	0.985473		-0.0597473	0.979723		-0.0552427	0.994432		-0.0612706	0.976906		-0.0558809	0.985835		-0.0572673	0.975796		-0.0625883	0.9804		-0.0554523	0.976363
-0.0559156	0.970776		-0.0493026	0.976592		-0.0597909	0.989424		-0.05229	0.973772		-0.0589719	0.975403		-0.0556487	0.961502		-0.0541233	0.976068		-0.0560482	1.00308		-0.0507552	0.97717		-0.0560012	0.980715		-0.0502416	0.98936		-0.0559606	0.971808		-0.0508798	0.982137		-0.0516444	0.987445		-0.0554014	0.98134		-0.0520115	0.976715
-0.0512283	0.981128		-0.0414901	0.98889		-0.0516656	0.984185		-0.0479146	0.986455		-0.0508485	0.981306		-0.0515899	0.96373		-0.0466217	0.99366		-0.0504215	1.00562		-0.0438792	0.988585		-0.0494399	0.977376		-0.0427419	0.984102		-0.0481481	0.966075		-0.0465044	0.979675		-0.0482035	0.998618		-0.0475889	0.985452		-0.0463886	0.980301
-0.0443533	0.986678		-0.0358635	0.994747		-0.0466664	0.987945		-0.0438519	0.981458		-0.0442853	0.994087		-0.044712	0.965429		-0.0416225	1.00322		-0.042609	1.00081		-0.0391929	0.992516		-0.0419403	0.992454		-0.0361807	1.00446		-0.0415792	0.979439		-0.0396303	0.984858		-0.0419551	0.994913		-0.0429045	1.00182		-0.0385761	0.980775
-0.0365408	0.989905		-0.031488	0.994803		-0.0429166	0.999029		-0.0369778	0.984808		-0.0405354	0.992681		-0.0365867	0.97145		-0.0372471	0.98863		-0.0363606	0.999709		-0.0341918	0.995466		-0.0363098	0.99382		-0.0314924	1.00907		-0.0372075	0.985352		-0.0318178	0.997345		-0.0344554	0.997126		-0.0391508	1.00644		-0.0326405	0.98896
-0.030916	1.00363		-0.0255523	0.998309		-0.0366662	0.992357		-0.029791	0.98451		-0.0358472	0.99244		-0.0312766	0.985735		-0.030373	0.990021		-0.0319851	1.00005		-0.0270049	0.990368		-0.0319381	0.999316		-0.0264913	1.00306		-0.0322103	0.971016		-0.0258783	0.996841		-0.0285197	0.99947		-0.0325896	1.00162		-0.0282612	0.99998
-0.0268534	0.995026		-0.017427	1.00949		-0.0288537	0.996887		-0.0244771	0.991819		-0.0283475	1.00206		-0.0275268	0.984644		-0.0222477	0.988249		-0.0266712	0.993131		-0.0195052	1.00525		-0.0260024	0.991888		-0.0193044	1.00196		-0.0243978	0.98144		-0.0218156	0.996267		-0.0241404	0.992326		-0.0247771	1.00905		-0.0226383	0.989161
-0.0202911	0.988677		-0.0108658	0.992091		-0.0229161	1.0004		-0.0201016	0.988137		-0.0214734	1.00303		-0.0215873	0.984809		-0.0166229	0.99091		-0.0188587	1.00254		-0.0145041	1.00966		-0.0181899	0.998345		-0.0118047	1.00592		-0.0172109	0.997169		-0.0155672	0.998649		-0.0185176	0.995778		-0.019467	1.00529		-0.0148258	0.986329
-0.0121658	0.989113		-0.0068031	0.998202		-0.0188535	1.00556		-0.0135403	0.99276		-0.0167851	1.00112		-0.0137748	0.978546		-0.0125603	0.998157		-0.0116718	1.00381		-0.0101306	1.00906		-0.0113159	1.00034		-0.00680368	1.00115		-0.0125188	0.999634		-0.00744186	1.01013		-0.0107051	1.00017		-0.0154043	1.00217		-0.00795174	0.996927
-0.00622825	1.00328		-0.00148923	1		-0.0129159	1.00378		-0.00541504	0.998607		-0.011786	1.00478		-0.00783911	0.98496		-0.0063099	1.00349		-0.00698358	0.997908		-0.00325459	1		-0.0072494	0.991151		-0.00211923	1		-0.00783435	0.995679		-0.00150619	1		-0.00351818	0.9933		-0.00915205	1.00406		-0.00325966	0.999182
-0.0021656	1		0.00663608	0.993672		-0.00510341	1.01013		0.00052063	1		-0.00459718	0.996034		-0.00346365	0.990058		0.00181541	1		-0.00229532	1		0.00487071	1.00604		-0.00193934	1		0.00475867	1.01548		-0.000647465	1		0.00255646	1.00075		0.000861092	1		-0.00102675	1		0.00142479	1
0.00408383	0.99897		0.0135102	0.99525		0.00177258	1		0.00458328	0.988909		0.00290252	1		0.00216303	1		0.00775298	0.998498		0.00489157	1.01044		0.0101827	1.01259		0.00587316	1.00906		0.0125712	1.00463		0.00716504	1.00266		0.00880875	1.00153		0.00554554	1.0022		0.00522173	1.00485		0.00923729	0.996767
0.0125219	0.9992		0.0178856	0.986389		0.00583523	1.00866		0.0105228	0.985692		0.00821448	1.00302		0.00997553	0.995919		0.0118156	0.988941		0.0127041	1.01261		0.0142453	1.0082		0.0130601	1.0152		0.0178812	1.00244		0.0121699	0.998509		0.0169341	0.992275		0.013358	1.01444		0.00959719	1.01399		0.016737	0.98392
0.0181467	1.00246		0.0228867	0.996515		0.0111472	1.01027		0.0186481	0.992961		0.0125899	1.01303		0.0168496	0.983009		0.0180641	0.996797		0.0173923	1.0091		0.0211194	1.01373		0.0174393	1.00631		0.0222567	1.00906		0.0165416	0.987834		0.0231825	0.999597		0.0208577	1.00015		0.0152239	1.01302		0.0214214	0.986927
0.0215847	0.997198		0.0306992	1.00207		0.0189597	0.996439		0.0248965	0.987287		0.0191531	1.00222		0.0212251	0.972943		0.0261894	0.996513		0.0217678	1.0164		0.0292447	1.01158		0.0224366	1.00657		0.0291308	1.00249		0.0237285	0.994341		0.0266196	1.00938		0.0255498	1.00168		0.0233492	1.00717		0.0258007	0.993335
0.0272095	0.989077		0.0381989	0.995149		0.0261466	0.993286		0.0289592	0.988169		0.0272765	0.990879		0.0262261	0.96454		0.032127	0.989583		0.0292675	1.0018		0.0345567	0.99854		0.0302491	0.99943		0.0372561	1.00393		0.0315409	0.999495		0.0319334	0.995704		0.0302343	0.994972		0.0302233	0.99943		0.0336132	0.990285
0.035022	0.995558		0.0422615	0.984052		0.030522	1.00037		0.0348987	0.997676		0.0325904	0.985834		0.0340386	0.96883		0.0358768	0.982323		0.03708	1.00182		0.0379956	0.991338		0.037436	1.00127		0.04257	1.00073		0.0365458	0.983369		0.0397459	0.988373		0.037734	0.991859		0.0342859	0.994973		0.0414257	0.983464
0.0415842	0.995427		0.0463242	0.980371		0.0355212	1.00001		0.0430202	0.988727		0.036653	0.996131		0.0412255	0.975505		0.0411907	0.983148		0.0417644	1.00379		0.0442441	1.00442		0.0415024	0.99029		0.046007	0.989041		0.0399791	0.979794		0.0459944	1.00338		0.0452337	0.985048		0.039596	0.992895		0.0457973	0.980032
0.0456469	0.980194		0.0535111	0.985327		0.0433337	1.00116		0.0495853	0.974615		0.0435271	0.98934		0.0459138	0.971378		0.0486904	0.987994		0.0455143	1.00243		0.0520566	1.00087		0.0458741	0.989458		0.0522555	0.984328		0.0465403	0.984514		0.0503699	1.0009		0.0496053	0.987764		0.0477213	0.997446		0.049551	0.98136
0.0509588	0.97846		0.0610108	0.973857		0.0508334	0.99475		0.0533351	0.977465		0.0519652	0.983961		0.0505982	0.968643		0.0552517	0.982144		0.0523922	0.999358		0.0579942	0.990089		0.053061	0.990073		0.059759	0.997164		0.0543528	0.990522		0.0556838	0.99643		0.0536718	0.972008		0.0545992	0.989332		0.0564251	0.976632
0.0587713	0.97075		0.0660118	0.971886		0.0545852	0.986122		0.0583362	0.968157		0.0572772	0.972904		0.0584107	0.958059		0.05994	0.97723		0.0598919	0.99347		0.0620568	0.974305		0.0602479	0.990408		0.0656946	0.990307		0.0596705	0.977535		0.0631834	0.990012		0.0605458	0.979404		0.058349	0.97945		0.0639248	0.974832
0.0659592	0.962537		0.0703873	0.967928		0.0589587	0.988904		0.0658359	0.973247		0.0607143	0.974867		0.0659104	0.952497		0.0649391	0.97699		0.0652019	0.987765		0.0679944	0.965669		0.0649399	0.976334		0.0697573	0.97668		0.0640422	0.958552		0.0703703	0.981234		0.0680455	0.982392		0.0630335	0.980774		0.0692348	0.969227
0.0706465	0.963296		0.0772614	0.962559		0.0661475	0.981845		0.0723972	0.971124		0.0666518	0.977563		0.0699731	0.955105		0.0724407	0.973632		0.0692646	0.98328		0.0758069	0.972705		0.0696244	0.973464		0.075693	0.975238		0.0702906	0.959967		0.0750586	0.977274		0.0733556	0.971565		0.0702242	0.987635		0.0736141	0.960113
0.0753338	0.961325		0.0853867	0.956391		0.0733344	0.972091		0.0770854	0.961426		0.0744643	0.976877		0.0740357	0.941924		0.0799404	0.961635		0.0758297	0.99061		0.0823701	0.959328		0.0764985	0.969775		0.0835055	0.976507		0.0781031	0.955121		0.0797469	0.962928		0.0774221	0.950803		0.0774111	0.971673		0.0801754	0.961159
0.0828344	0.95585		0.0910095	0.946509		0.0783336	0.960591		0.0820827	0.950986		0.0804019	0.969143		0.0812226	0.93961		0.0846268	0.953719		0.0836422	0.967169		0.0867456	0.943092		0.0846238	0.961968		0.0903834	0.957574		0.0843516	0.94579		0.0872466	0.95761		0.0839833	0.945129		0.0820955	0.965174		0.0879879	0.944857
0.0903341	0.946994		0.0950722	0.940965		0.082709	0.959638		0.0892734	0.943838		0.0844646	0.960382		0.0887261	0.932645		0.0890022	0.944225		0.0898907	0.951578		0.0920575	0.946758		0.0899338	0.949659		0.0947588	0.950808		0.0887309	0.942097		0.0950591	0.942013		0.0921087	0.95127		0.0867838	0.951035		0.0939236	0.938734
0.0950214	0.939046		0.101324	0.924003		0.089585	0.96014		0.0970859	0.939777		0.0900893	0.944081		0.0937234	0.924735		0.0961891	0.936001		0.0942661	0.951079		0.0995572	0.948944		0.0940003	0.950404		0.0997561	0.94852		0.094041	0.940673		0.100056	0.93863		0.0980443	0.940838		0.0939707	0.94746		0.09799	0.933736
0.0993969	0.932824		0.10945	0.911115		0.0973975	0.942679		0.102083	0.925614		0.0979018	0.94191		0.0984116	0.925638		0.104002	0.92367		0.0998928	0.935845		0.106744	0.92819		0.100562	0.940524		0.107569	0.940993		0.102166	0.935443		0.104432	0.936475		0.102111	0.933493		0.101783	0.942193		0.103926	0.916559
0.106897	0.931309		0.115385	0.90892		0.103022	0.925436		0.106459	0.913961		0.105091	0.934148		0.104973	0.910308		0.109315	0.915929		0.107705	0.936048		0.111432	0.916568		0.108687	0.93133		0.114755	0.923592		0.10904	0.9274		0.111619	0.919072		0.108046	0.937752		0.10741	0.933572		0.112051	0.91258
0.115022	0.921671		0.119448	0.899144		0.107398	0.918269		0.113333	0.898925		0.109464	0.923775		0.112785	0.904028		0.113378	0.901848		0.114579	0.925985		0.116121	0.912145		0.114623	0.920024		0.119444	0.908613		0.11342	0.91544		0.119744	0.908975		0.116172	0.906728		0.111472	0.926418		0.118299	0.901744
0.119396	0.901166		0.125697	0.882301		0.113646	0.917174		0.121458	0.895817		0.114465	0.902256		0.118725	0.884954		0.120565	0.899984		0.118642	0.921835		0.123933	0.902721		0.118689	0.906964		0.124132	0.902289		0.118417	0.89899		0.124432	0.894903		0.12242	0.904257		0.118034	0.911278		0.122679	0.893548
0.123147	0.900482		0.133822	0.871631		0.121459	0.91164		0.126772	0.895997		0.122278	0.904261		0.122788	0.875119		0.128378	0.893921		0.123952	0.915562		0.131433	0.89332		0.124937	0.905874		0.131632	0.899767		0.126229	0.88743		0.128182	0.892721		0.126487	0.897608		0.126159	0.892073		0.128302	0.888231
0.130021	0.888463		0.139761	0.847297		0.127709	0.897396		0.130835	0.882365		0.129465	0.884968		0.128723	0.866117		0.133377	0.882017		0.132077	0.903281		0.135808	0.87665		0.133063	0.889975		0.139131	0.88657		0.133416	0.873266		0.134747	0.886467		0.13211	0.891469		0.132099	0.886707		0.136427	0.879256
0.137522	0.875371		0.143511	0.842865		0.131772	0.885065		0.137709	0.866228		0.13384	0.869695		0.136849	0.856582		0.136816	0.862976		0.139264	0.878186		0.139869	0.860534		0.138998	0.860959		0.143507	0.878872		0.13717	0.867151		0.142247	0.870382		0.140235	0.889928		0.136161	0.874179		0.142988	0.853818
0.142834	0.858666		0.148821	0.839651		0.138022	0.879584		0.146147	0.851638		0.138526	0.863903		0.143101	0.843253		0.143377	0.853728		0.143018	0.865164		0.146745	0.857317		0.142439	0.855668		0.147882	0.86183		0.141854	0.857162		0.147557	0.854463		0.146796	0.859117		0.14241	0.867806		0.146734	0.832617
0.147209	0.840168		0.156634	0.835991		0.146147	0.858409		0.151461	0.840666		0.146339	0.853813		0.147163	0.832746		0.151189	0.842584		0.147702	0.857893		0.153932	0.851336		0.148062	0.854694		0.154756	0.849531		0.149354	0.842019		0.151932	0.840837		0.15055	0.839425		0.150535	0.857526		0.151426	0.826046
0.153772	0.829493		0.163199	0.821254		0.152396	0.845762		0.154898	0.829998		0.153841	0.831654		0.152786	0.831859		0.156503	0.82131		0.155202	0.852898		0.159246	0.832056		0.155562	0.848384		0.161943	0.826484		0.156228	0.830992		0.158185	0.830894		0.155547	0.836139		0.156471	0.838358		0.158926	0.816187
0.161584	0.813372		0.167574	0.802851		0.155835	0.827565		0.161146	0.821078		0.158214	0.811348		0.161224	0.815168		0.160877	0.819694		0.16208	0.838063		0.163619	0.812314		0.162123	0.823849		0.167257	0.810656		0.16092	0.823127		0.165997	0.818159		0.163047	0.820526		0.159912	0.823536		0.1658	0.815268
0.167834	0.796691		0.172572	0.777116		0.161147	0.818523		0.168646	0.805936		0.162277	0.814833		0.167786	0.78659		0.166814	0.807474		0.166455	0.817575		0.170183	0.812677		0.166502	0.804224		0.171633	0.803316		0.165605	0.803416		0.172246	0.791994		0.169921	0.806302		0.165534	0.805173		0.170485	0.799507
0.171897	0.778234		0.180384	0.765909		0.168959	0.806508		0.174585	0.7854		0.169153	0.801625		0.171223	0.773531		0.174627	0.789646		0.17114	0.801586		0.177995	0.783353		0.171812	0.78726		0.178194	0.790637		0.172479	0.800031		0.176621	0.778079		0.174292	0.782733		0.173347	0.789902		0.175489	0.781355
0.177835	0.774288		0.187575	0.747552		0.175523	0.787007		0.178961	0.772059		0.176652	0.784973		0.176224	0.768785		0.181503	0.766733		0.178327	0.791598		0.183933	0.756346		0.179312	0.774014		0.186006	0.773918		0.180291	0.778433		0.182244	0.767136		0.179297	0.766239		0.179286	0.77268		0.182676	0.771552
0.185647	0.763609		0.192259	0.730904		0.179585	0.773932		0.184896	0.76303		0.181652	0.769503		0.184036	0.763882		0.185566	0.742567		0.186139	0.773374		0.187995	0.746747		0.186812	0.756822		0.191946	0.754009		0.185601	0.753639		0.190056	0.745289		0.186797	0.75738		0.183658	0.763324		0.190176	0.747421
0.192521	0.738698		0.196948	0.717052		0.184897	0.755981		0.192709	0.747405		0.186027	0.752997		0.19091	0.735585		0.190878	0.741204		0.191453	0.754543		0.194246	0.741747		0.191496	0.734797		0.196009	0.737051		0.189981	0.741197		0.196934	0.72883		0.194297	0.746808		0.188972	0.745392		0.195173	0.719358
0.196584	0.722599		0.204447	0.707422		0.192397	0.742079		0.199583	0.728686		0.192903	0.734709		0.195286	0.719965		0.199003	0.729617		0.195829	0.733817		0.202058	0.727502		0.195876	0.717446		0.201944	0.724729		0.196542	0.73042		0.20131	0.711641		0.199294	0.71433		0.196784	0.735138		0.199553	0.706848
0.201897	0.708429		0.211947	0.692852		0.199897	0.728859		0.203958	0.702679		0.200716	0.719938		0.200287	0.703217		0.205877	0.706437		0.202703	0.723239		0.208307	0.70754		0.203375	0.70994		0.210069	0.700674		0.204667	0.709793		0.206307	0.703858		0.203673	0.701431		0.203971	0.719721		0.206427	0.712787
0.210022	0.700005		0.216948	0.674655		0.204585	0.704813		0.209272	0.685916		0.20634	0.696561		0.207787	0.686914		0.210252	0.693108		0.210828	0.700853		0.212682	0.685401		0.211188	0.701676		0.216318	0.678383		0.21029	0.686874		0.214432	0.690315		0.210547	0.701308		0.20866	0.688791		0.214552	0.697187
0.217209	0.673752		0.221323	0.660618		0.20896	0.686582		0.217085	0.682047		0.210714	0.686256		0.215286	0.671085		0.215564	0.679576		0.216455	0.681724		0.218307	0.679499		0.215872	0.68922		0.220381	0.662723		0.214356	0.668618		0.221619	0.662325		0.21836	0.675568		0.213348	0.674833		0.219862	0.674776
0.220959	0.648606		0.22851	0.646721		0.21646	0.68842		0.224272	0.657697		0.216651	0.676102		0.220287	0.647167		0.223377	0.667567		0.220517	0.66839		0.226745	0.657966		0.220252	0.668607		0.22632	0.660545		0.220918	0.662857		0.225682	0.645889		0.22367	0.65472		0.220847	0.671135		0.223928	0.662189
0.225647	0.638419		0.236636	0.62494		0.224272	0.660657		0.228647	0.630766		0.224777	0.659494		0.224663	0.638991		0.230253	0.639943		0.227079	0.66191		0.232995	0.629892		0.227438	0.651994		0.234445	0.639587		0.229043	0.649561		0.230057	0.642432		0.228049	0.632355		0.22866	0.643108		0.230803	0.637292
0.233147	0.628081		0.241324	0.597277		0.229272	0.643087		0.233335	0.626225		0.231027	0.636733		0.231537	0.629371		0.234315	0.617203		0.235204	0.644077		0.236745	0.608998		0.235564	0.629459		0.241007	0.617486		0.234666	0.625558		0.237244	0.626059		0.234923	0.617431		0.233348	0.624393		0.238928	0.621472
0.240022	0.607331		0.245074	0.583468		0.233647	0.628608		0.241461	0.614028		0.235403	0.617517		0.239349	0.603266		0.238689	0.607603		0.240827	0.611857		0.241744	0.610967		0.240248	0.612372		0.244444	0.594371		0.238107	0.615732		0.244431	0.599618		0.243049	0.610615		0.237724	0.617353		0.244551	0.607276
0.244709	0.594791		0.251635	0.577322		0.240834	0.622114		0.24896	0.597088		0.241027	0.60389		0.244663	0.579885		0.246191	0.597227		0.244268	0.594886		0.249244	0.59955		0.244002	0.601758		0.249445	0.591221		0.24373	0.604458		0.249119	0.590674		0.248046	0.589517		0.245536	0.607127		0.247984	0.594308
0.249397	0.585815		0.259135	0.55821		0.248959	0.599905		0.253023	0.577783		0.249465	0.594235		0.249039	0.568399		0.253065	0.573453		0.249891	0.594904		0.255807	0.570678		0.250563	0.591133		0.257257	0.582436		0.251542	0.590137		0.253808	0.577828		0.251487	0.573362		0.253349	0.584084		0.253927	0.580349
0.256584	0.566275		0.264761	0.546573		0.253648	0.573399		0.257086	0.556832		0.255714	0.573338		0.255913	0.567614		0.258066	0.562704		0.257703	0.579512		0.260495	0.558906		0.258376	0.567695		0.263819	0.562478		0.258103	0.564647		0.260995	0.566534		0.257735	0.564162		0.257724	0.554499		0.26174	0.554892
0.264397	0.545793		0.269137	0.530183		0.257397	0.557828		0.264273	0.548127		0.259153	0.556834		0.264038	0.544759		0.262439	0.545062		0.263955	0.556481		0.265495	0.550203		0.263686	0.553379		0.268507	0.542418		0.262483	0.551038		0.268494	0.5405		0.265548	0.543896		0.261474	0.542027		0.267675	0.537373
0.269709	0.519952		0.275073	0.527174		0.263959	0.551847		0.271459	0.531215		0.264465	0.544374		0.269348	0.522895		0.269315	0.535812		0.268327	0.540147		0.272994	0.531299		0.267752	0.53716		0.273508	0.533617		0.267793	0.541468		0.274121	0.523005		0.271483	0.527965		0.268348	0.535618		0.271734	0.522456
0.274084	0.507723		0.283198	0.509847		0.271771	0.535811		0.276461	0.515136		0.271965	0.53403		0.273098	0.512299		0.277441	0.517145		0.273641	0.530284		0.280494	0.512085		0.274001	0.518993		0.281008	0.525129		0.275292	0.524581		0.278184	0.518327		0.275855	0.512641		0.275848	0.521234		0.277678	0.513276
0.280647	0.506745		0.289446	0.488713		0.277085	0.513654		0.280836	0.49899		0.278528	0.511044		0.27935	0.511463		0.283065	0.502978		0.281453	0.516231		0.285495	0.493812		0.282126	0.5056		0.288507	0.498523		0.282479	0.505251		0.284745	0.507735		0.281798	0.501406		0.281162	0.502762		0.28549	0.503032
0.288772	0.48297		0.293822	0.471478		0.281459	0.505722		0.28771	0.484451		0.282903	0.49186		0.28685	0.493901		0.287128	0.481708		0.28864	0.495736		0.290183	0.475591		0.288374	0.48533		0.293196	0.475136		0.287164	0.480059		0.29287	0.485457		0.289611	0.483514		0.285221	0.485359		0.292051	0.478832
0.294397	0.463288		0.299448	0.456127		0.287396	0.492454		0.295523	0.471899		0.287902	0.47832		0.292786	0.471354		0.293689	0.477914		0.293016	0.475576		0.297057	0.466017		0.292746	0.472754		0.297884	0.463307		0.292169	0.475659		0.29881	0.458995		0.296172	0.466221		0.291786	0.479758		0.296736	0.462803
0.298459	0.451881		0.307261	0.447607		0.295521	0.470301		0.301458	0.457045		0.295715	0.469187		0.297161	0.446634		0.301502	0.463323		0.298017	0.467442		0.30487	0.449052		0.298064	0.464654		0.305071	0.45628		0.299668	0.458119		0.302872	0.450103		0.300544	0.444547		0.299598	0.467244		0.301741	0.452542
0.305334	0.446094		0.314135	0.430933		0.301772	0.448665		0.305521	0.442899		0.303215	0.452398		0.303101	0.443879		0.307439	0.438096		0.305516	0.464919		0.310182	0.438556		0.306189	0.439957		0.312883	0.433295		0.307168	0.438133		0.309121	0.440693		0.305861	0.434522		0.305847	0.449709		0.309553	0.434562
0.31346	0.428999		0.31851	0.408677		0.306147	0.438581		0.311773	0.436693		0.308216	0.431926		0.310913	0.426885		0.311502	0.417708		0.313016	0.438097		0.314245	0.424837		0.313063	0.420877		0.31788	0.411014		0.311853	0.423608		0.317559	0.430343		0.313674	0.421273		0.310222	0.423538		0.31674	0.417826
0.319084	0.408275		0.323512	0.398303		0.311459	0.431251		0.319899	0.418987		0.312589	0.420294		0.317787	0.41352		0.317752	0.407001		0.317704	0.419196		0.321121	0.408495		0.317122	0.40573		0.322256	0.405505		0.316232	0.409021		0.323182	0.408307		0.320861	0.406219		0.315849	0.422774		0.321424	0.409584
0.322521	0.391104		0.331637	0.382465		0.319585	0.411103		0.325834	0.393416		0.319465	0.410017		0.32185	0.397906		0.326191	0.397603		0.322393	0.404549		0.329557	0.397075		0.32244	0.399324		0.329447	0.402875		0.323732	0.404816		0.326619	0.390347		0.325232	0.39241		0.323974	0.412079		0.326109	0.392008
0.328459	0.396604		0.338824	0.362809		0.326459	0.392282		0.329897	0.382437		0.327278	0.392574		0.327164	0.391125		0.332128	0.380605		0.329892	0.388155		0.334558	0.37534		0.330565	0.384239		0.337259	0.379952		0.331544	0.386848		0.332558	0.383578		0.330237	0.379038		0.330535	0.392708		0.333921	0.380129
0.336271	0.37951		0.342574	0.354223		0.330834	0.371563		0.336145	0.383009		0.33259	0.369936		0.334976	0.376642		0.335565	0.365975		0.337705	0.370179		0.337995	0.359252		0.337752	0.363035		0.342256	0.35762		0.336228	0.366221		0.340371	0.379533		0.337737	0.366219		0.334598	0.372676		0.341429	0.36846
0.342522	0.354585		0.347262	0.347852		0.335835	0.36785		0.344271	0.365549		0.336965	0.357069		0.342163	0.354765		0.34119	0.363669		0.34208	0.349384		0.344245	0.356657		0.341498	0.347254		0.346006	0.354506		0.339982	0.359571		0.346306	0.353224		0.345237	0.344626		0.340221	0.359481		0.345488	0.354315
0.346896	0.342128		0.354449	0.336349		0.343959	0.358574		0.350523	0.344119		0.343839	0.350063		0.346848	0.338316		0.34869	0.346535		0.34583	0.346228		0.352058	0.34313		0.345877	0.341617		0.352259	0.342988		0.346543	0.349624		0.350682	0.339794		0.349608	0.326545		0.348659	0.343301		0.349859	0.341478
0.352209	0.332439		0.361636	0.312408		0.351147	0.341173		0.35396	0.325884		0.351964	0.33287		0.351536	0.327603		0.355253	0.322866		0.352704	0.337617		0.357995	0.325208		0.353377	0.335038		0.360071	0.327758		0.354043	0.332591		0.356309	0.330088		0.353675	0.323328		0.355224	0.327705		0.356741	0.331192
0.360022	0.318717		0.366637	0.292149		0.354897	0.324371		0.35927	0.315944		0.356966	0.321354		0.359348	0.314858		0.359628	0.3136		0.360204	0.31606		0.362058	0.308467		0.360251	0.321868		0.365694	0.31572		0.359353	0.318586		0.363808	0.312209		0.360862	0.316862		0.358974	0.314929		0.363928	0.313695
0.36721	0.30279		0.371012	0.288542		0.359273	0.317408		0.367083	0.308923		0.360715	0.30668		0.366848	0.2971		0.364627	0.301573		0.365518	0.300057		0.367996	0.298221		0.364935	0.300649		0.370069	0.293827		0.363732	0.301524		0.370995	0.297551		0.368049	0.300591		0.363658	0.308391		0.369238	0.286645
0.371584	0.285489		0.377886	0.278775		0.366772	0.310675		0.373648	0.290137		0.366964	0.303549		0.370911	0.285506		0.372127	0.28968		0.369889	0.290271		0.375808	0.285453		0.369627	0.289772		0.376009	0.284174		0.370294	0.291481		0.375371	0.284196		0.373359	0.279139		0.371158	0.295137		0.37361	0.275044
0.376584	0.272546		0.386012	0.261553		0.373646	0.28894		0.378023	0.276658		0.374465	0.290356		0.375286	0.275134		0.379627	0.274307		0.376455	0.277767		0.382369	0.273643		0.376814	0.2786		0.383821	0.27414		0.378106	0.283143		0.380372	0.27018		0.37773	0.267369		0.378036	0.277975		0.380178	0.269002
0.384397	0.263063		0.391634	0.248792		0.378648	0.26807		0.38302	0.267826		0.380403	0.269417		0.382473	0.267919		0.384315	0.25818		0.38458	0.273592		0.387058	0.254144		0.384627	0.262467		0.390383	0.254109		0.384355	0.266163		0.387871	0.255523		0.384299	0.263126		0.382724	0.265576		0.387991	0.257944
0.391585	0.249738		0.395697	0.233384		0.383334	0.258389		0.390833	0.254461		0.384777	0.256636		0.389973	0.255405		0.389001	0.244234		0.390516	0.255541		0.39237	0.243224		0.389937	0.250906		0.394445	0.240824		0.388421	0.246124		0.395371	0.247874		0.392424	0.244088		0.387409	0.254834		0.393927	0.241973
0.396272	0.231047		0.401949	0.224651		0.39021	0.252117		0.398333	0.241631		0.390714	0.246866		0.394661	0.237546		0.39619	0.231938		0.394578	0.24028		0.399869	0.231345		0.394309	0.23743		0.399759	0.231746		0.394357	0.236524		0.400372	0.228552		0.398047	0.224674		0.394596	0.247105		0.397985	0.226816
0.400959	0.222047		0.410384	0.214843		0.398022	0.232326		0.403021	0.223486		0.398527	0.231178		0.399036	0.228222		0.404003	0.222182		0.400518	0.229895		0.407058	0.222748		0.400877	0.223886		0.407572	0.223903		0.402169	0.229059		0.404744	0.218948		0.402106	0.214054		0.402408	0.228868		0.404234	0.220354
0.408459	0.214316		0.416323	0.192301		0.403334	0.212595		0.407709	0.210874		0.40509	0.218691		0.405911	0.21906		0.409002	0.210648		0.408643	0.215449		0.411432	0.206878		0.409003	0.210899		0.414759	0.210036		0.409043	0.210439		0.412247	0.21078		0.408362	0.207486		0.407409	0.20887		0.412359	0.210426
0.416271	0.197232		0.420073	0.182137		0.40771	0.20726		0.414896	0.2045		0.409465	0.202004		0.414036	0.200908		0.413377	0.201786		0.414891	0.201849		0.416433	0.192519		0.414626	0.198058		0.419134	0.195797		0.413102	0.192846		0.42006	0.194577		0.41648	0.193395		0.411785	0.192413		0.418615	0.190935
0.420647	0.178225		0.426321	0.179581		0.414271	0.200888		0.422708	0.186682		0.414777	0.189928		0.419663	0.186239		0.420564	0.193511		0.419267	0.186046		0.424245	0.177462		0.418684	0.183192		0.424131	0.185815		0.41842	0.18643		0.424431	0.172417		0.422423	0.175387		0.418659	0.188407		0.422361	0.180602
0.424397	0.17032		0.43476	0.159846		0.422396	0.181763		0.427709	0.172279		0.42259	0.179127		0.424038	0.176801		0.42869	0.173792		0.42489	0.17805		0.431745	0.163084		0.425246	0.17553		0.431944	0.169613		0.426545	0.170837		0.428494	0.161832		0.426482	0.161922		0.426784	0.171519		0.428297	0.175264
0.431272	0.163898		0.440386	0.143351		0.428334	0.16495		0.432085	0.161549		0.429777	0.167646		0.430286	0.167268		0.433378	0.158431		0.433015	0.165075		0.435495	0.153624		0.433371	0.163606		0.439443	0.155492		0.433419	0.159254		0.435059	0.160603		0.432731	0.156248		0.432098	0.152301		0.436422	0.16049
0.438771	0.151439		0.443823	0.135419		0.432397	0.156643		0.439272	0.154061		0.434152	0.154948		0.438099	0.154012		0.436815	0.148764		0.43958	0.149716		0.43987	0.142929		0.439314	0.148503		0.443506	0.145376		0.437165	0.14698		0.442559	0.143344		0.440856	0.143665		0.43616	0.146225		0.442991	0.142001
0.444084	0.136538		0.449446	0.134324		0.438647	0.149787		0.447084	0.146454		0.439153	0.146415		0.444351	0.140288		0.443378	0.140053		0.44333	0.137525		0.447057	0.137761		0.442748	0.135902		0.447882	0.131686		0.441857	0.138732		0.447869	0.131725		0.446799	0.126961		0.443035	0.140535		0.446737	0.130779
0.448459	0.130401		0.457259	0.125274		0.446772	0.139404		0.452085	0.13128		0.446966	0.134734		0.44841	0.127639		0.451191	0.131248		0.448014	0.131732		0.454246	0.126993		0.44837	0.130843		0.455068	0.122478		0.449357	0.131984		0.452244	0.124832		0.450545	0.117923		0.45116	0.126641		0.451735	0.123471
0.455022	0.123411		0.463511	0.110571		0.45271	0.123421		0.455835	0.12128		0.454465	0.11826		0.45435	0.122884		0.456503	0.116083		0.455827	0.119758		0.459245	0.114428		0.456183	0.121268		0.462259	0.114093		0.456231	0.120619		0.458497	0.116161		0.455542	0.11367		0.456787	0.114686		0.459234	0.118716
0.462835	0.110484		0.467886	0.100311		0.456147	0.112753		0.462397	0.111273		0.458215	0.108573		0.462788	0.114032		0.460878	0.106295		0.462705	0.111366		0.46362	0.105098		0.462439	0.111954		0.466944	0.104098		0.460916	0.108402		0.466622	0.105175		0.463355	0.106016		0.460224	0.108136		0.465803	0.104877
0.468772	0.0963352		0.473196	0.0917955		0.461772	0.110183		0.469896	0.102137		0.462591	0.106324		0.468723	0.101798		0.467126	0.0992271		0.46708	0.101802		0.470495	0.0966255		0.466811	0.101731		0.471632	0.0969912		0.465608	0.101821		0.47287	0.0940896		0.470237	0.0936411		0.466159	0.105258		0.470488	0.0903383
0.473147	0.089074		0.481009	0.0835385		0.469584	0.10027		0.475836	0.0926295		0.469778	0.100325		0.472473	0.0918641		0.474939	0.0898326		0.472078	0.0982962		0.47862	0.0891524		0.472121	0.0929164		0.478506	0.0901725		0.472795	0.0957111		0.476933	0.085417		0.474608	0.0851764		0.473972	0.0922661		0.475485	0.0850058
0.479084	0.0850198		0.4882	0.076231		0.475835	0.0854293		0.480211	0.0841607		0.476964	0.0903626		0.477787	0.0855664		0.481189	0.0785788		0.479264	0.0919599		0.484245	0.0762266		0.479933	0.0828175		0.486318	0.0800615		0.480607	0.0840009		0.48256	0.078958		0.479606	0.080653		0.479911	0.0787248		0.482985	0.0806998
0.486897	0.0773445		0.492884	0.0668872		0.48021	0.0779177		0.486147	0.0778635		0.481966	0.0783814		0.4856	0.0781854		0.485565	0.0706625		0.487077	0.0794539		0.488307	0.0685459		0.487128	0.0734068		0.491945	0.0728571		0.485917	0.0763132		0.490681	0.072406		0.487105	0.0745367		0.483974	0.0718441		0.490484	0.0735811
0.493459	0.0655816		0.497572	0.0612665		0.485522	0.0729977		0.494272	0.0710964		0.486339	0.073963		0.492161	0.0667046		0.49119	0.0665536		0.492078	0.068693		0.494558	0.0654254		0.491499	0.0667546		0.496008	0.0637826		0.489984	0.0711529		0.497246	0.0616444		0.494605	0.0630213		0.489597	0.0634261		0.495489	0.0664483
0.497522	0.0578436		0.505072	0.0543963		0.493334	0.0669479		0.500521	0.0635645		0.493215	0.0671586		0.496536	0.0602517		0.499315	0.0640931		0.496453	0.0603301		0.502683	0.0596315		0.496184	0.0618698		0.502569	0.0578475		0.496858	0.0640482		0.501309	0.0547649		0.49961	0.0551095		0.497409	0.0594948		0.499861	0.0570673
0.503146	0.0538515		0.512885	0.0471987		0.500521	0.0572876		0.504896	0.0561704		0.501028	0.0591254		0.501537	0.0570511		0.506189	0.052257		0.503328	0.0568214		0.508621	0.0515435		0.503684	0.0553197		0.510694	0.0510099		0.504983	0.0561546		0.506932	0.0511308		0.503982	0.0504092		0.504596	0.0558275		0.506735	0.0544003
0.511584	0.0508658		0.517886	0.0446707		0.50521	0.0520797		0.51021	0.0506786		0.506652	0.0500448		0.509037	0.0527529		0.510252	0.0486419		0.511453	0.0497063		0.512683	0.0453225		0.511183	0.0489798		0.516634	0.0461978		0.510293	0.0496916		0.515057	0.0462455		0.511168	0.0463561		0.508972	0.0465052		0.51486	0.0466343
0.518147	0.042016		0.522261	0.0397422		0.509896	0.0481833		0.518022	0.0441687		0.511028	0.0453342		0.516537	0.0472563		0.515565	0.0466009		0.516767	0.0429111		0.518932	0.0411409		0.516188	0.0432456		0.520384	0.0413447		0.514352	0.0433162		0.521931	0.0404799		0.518981	0.0415206		0.513973	0.0420217		0.520178	0.0421449
0.521585	0.0343511		0.529448	0.0343616		0.517398	0.0423149		0.525209	0.0404032		0.517278	0.0444177		0.521225	0.0401802		0.523691	0.0401302		0.520829	0.0382146		0.527057	0.037263		0.52056	0.0390342		0.526632	0.0380537		0.521234	0.0395348		0.525681	0.0357994		0.523986	0.0368054		0.521785	0.0402957		0.524237	0.0374721
0.526584	0.0327804		0.53726	0.0304963		0.524897	0.0357434		0.529585	0.0341936		0.525402	0.0398919		0.525601	0.0358034		0.530565	0.0351317		0.527703	0.035216		0.533307	0.0330528		0.528059	0.0356464		0.53507	0.0320973		0.529351	0.0354783		0.530369	0.0347539		0.528045	0.0326454		0.528972	0.0361659		0.531111	0.0348863
0.534396	0.0308876		0.541949	0.0276376		0.529896	0.0330001		0.534586	0.0311349		0.531339	0.0343112		0.5331	0.0328713		0.534315	0.0319512		0.535829	0.0323423		0.536744	0.0296959		0.535872	0.0308894		0.541006	0.0297323		0.534669	0.0320239		0.537869	0.0302913		0.535232	0.0316055		0.53366	0.032012		0.539236	0.0318658
0.54096	0.0263302		0.546011	0.0250126		0.534272	0.030149		0.542398	0.0277934		0.535402	0.0294603		0.540913	0.0295834		0.539003	0.0275134		0.541143	0.0264948		0.542058	0.0277809		0.540564	0.0279084		0.544443	0.0246985		0.538415	0.0293711		0.544747	0.0261365		0.543357	0.027204		0.538349	0.0289798		0.544241	0.0246773
0.545334	0.0232193		0.552573	0.0240543		0.541459	0.027121		0.549585	0.0245817		0.541652	0.026405		0.545914	0.0270544		0.54619	0.0249457		0.54458	0.0240398		0.549871	0.0266934		0.54431	0.0253378		0.55007	0.0224894		0.544046	0.0276794		0.549431	0.0234453		0.548362	0.0240305		0.546161	0.0259735		0.547987	0.0222733
0.550334	0.0206691		0.560072	0.0211487		0.549584	0.0242784		0.553648	0.0228756		0.549778	0.0246342		0.549973	0.0236641		0.553064	0.0226771		0.550828	0.0222465		0.556432	0.0225373		0.551184	0.0241093		0.557569	0.0212613		0.551858	0.0227258		0.55412	0.0223313		0.552108	0.0212591		0.553661	0.0231893		0.554235	0.0227461
0.557834	0.0198188		0.565386	0.0189844		0.554272	0.02049		0.558023	0.0213442		0.556028	0.0212479		0.557163	0.0197076		0.557752	0.0213223		0.558641	0.0212372		0.560808	0.0182203		0.558684	0.0221782		0.564131	0.0182483		0.557794	0.0203701		0.561307	0.0192774		0.558356	0.0210587		0.557723	0.0199885		0.562048	0.0188118
0.565334	0.0174632		0.569762	0.0154259		0.558022	0.0182796		0.56521	0.0196733		0.559465	0.0191265		0.565289	0.0193777		0.56244	0.0177929		0.56458	0.0189088		0.565807	0.0190592		0.563689	0.018933		0.568506	0.0167967		0.562165	0.0173921		0.569119	0.0183477		0.566169	0.0181332		0.562099	0.0186957		0.567678	0.0166594
0.570335	0.0140512		0.57601	0.015597		0.564583	0.0169145		0.572397	0.0180594		0.564777	0.0190834		0.569973	0.0176007		0.569627	0.0168443		0.568643	0.0167284		0.573308	0.0159208		0.56806	0.0164382		0.573507	0.0169034		0.567796	0.0154301		0.574433	0.0154393		0.571486	0.0150607		0.568973	0.0173347		0.57205	0.015009
0.574709	0.0125234		0.584135	0.0143428		0.572085	0.0165255		0.577398	0.0158545		0.572589	0.0173145		0.573723	0.0142061		0.57744	0.0157767		0.574578	0.0154008		0.580808	0.0151311		0.574622	0.0168754		0.58132	0.0159984		0.575608	0.0150151		0.578808	0.0144117		0.575858	0.0140043		0.57616	0.0154692		0.577986	0.014155
0.581897	0.012222		0.590384	0.012195		0.577397	0.014688		0.582083	0.0138511		0.579153	0.0145635		0.580288	0.0129044		0.582752	0.0147665		0.582391	0.0135038		0.585494	0.0130515		0.582434	0.0146363		0.588507	0.0137249		0.582795	0.0137764		0.58537	0.0139593		0.581794	0.0120112		0.581474	0.0144658		0.585798	0.0130985
0.589709	0.010675		0.594447	0.0123607		0.581773	0.0126631		0.588961	0.0124483		0.583215	0.0128022		0.587788	0.0130149		0.587127	0.0129159		0.589265	0.0118605		0.58987	0.012381		0.58869	0.0118624		0.593195	0.0117593		0.587167	0.0131785		0.593182	0.0114181		0.589919	0.0121082		0.585849	0.0131971		0.59236	0.0112052
0.595021	0.0101253		0.600073	0.0114987		0.588334	0.0112904		0.596773	0.0107736		0.588527	0.0125285		0.593411	0.0121091		0.59369	0.0125378		0.593328	0.0114023		0.597369	0.0113258		0.592749	0.011081		0.597883	0.0112909		0.591851	0.0116122		0.598809	0.0105204		0.59648	0.0113558		0.59241	0.0121822		0.596426	0.010825
0.599397	0.00929916		0.608511	0.0100931		0.596146	0.0103114		0.602396	0.00940337		0.596027	0.0113789		0.597786	0.0103246		0.601816	0.0103806		0.598642	0.0101192		0.605182	0.00923272		0.598685	0.0100909		0.605383	0.0118449		0.599664	0.00910385		0.602872	0.00940894		0.600547	0.00883905		0.600223	0.0110364		0.601736	0.00996918
0.606272	0.00895629		0.615073	0.00947948		0.602397	0.0103388		0.606459	0.00870016		0.603527	0.0105238		0.604038	0.0100687		0.607441	0.00894354		0.606454	0.00940096		0.610183	0.00958716		0.606497	0.00902397		0.612882	0.00905656		0.607171	0.00924		0.609433	0.00850517		0.605857	0.00877733		0.606159	0.0113792		0.609549	0.0088262
0.614396	0.00834999		0.619135	0.00944041		0.606459	0.00885137		0.612711	0.00753855		0.608215	0.00976952		0.611851	0.00955413		0.611503	0.00735267		0.613641	0.00846895		0.614246	0.00919487		0.613059	0.00884061		0.617884	0.00719177		0.611543	0.00845589		0.617558	0.00802006		0.613982	0.00903352		0.610221	0.00889965		0.616735	0.00741751
0.619709	0.00730457		0.624762	0.00845957		0.612397	0.00805749		0.621145	0.00725445		0.61259	0.00893848		0.618412	0.00840162		0.618064	0.00832758		0.618016	0.00757189		0.621433	0.00790826		0.617438	0.00766474		0.622259	0.00707946		0.616227	0.00826576		0.623185	0.0067346		0.620856	0.00726375		0.616161	0.00833848		0.621115	0.00638113
0.623147	0.00577312		0.632887	0.00825564		0.620209	0.00659157		0.627085	0.00658133		0.619777	0.00878885		0.622788	0.00720864		0.62619	0.00799637		0.623017	0.00733867		0.629558	0.00760339		0.623061	0.00691634		0.629446	0.00673304		0.62404	0.00827362		0.626935	0.00531964		0.625235	0.00680377		0.624286	0.00730066		0.626112	0.00580789
0.629397	0.00566232		0.639449	0.00701028		0.626773	0.00520497		0.630835	0.0058667		0.62759	0.00738113		0.628098	0.00608183		0.631815	0.00832589		0.63083	0.00749057		0.634244	0.00663967		0.631186	0.00617916		0.637258	0.00615907		0.631539	0.00627903		0.632558	0.00605853		0.630233	0.00532949		0.630847	0.00700721		0.633924	0.00645467
0.637209	0.00557162		0.643198	0.00728556		0.631146	0.00584607		0.637083	0.00566033		0.632902	0.00702353		0.63591	0.00593321		0.635252	0.00738377		0.638017	0.0059234		0.637683	0.00541728		0.637747	0.00609068		0.642256	0.00516124		0.635919	0.00573443		0.64037	0.00574284		0.638045	0.00526156		0.63491	0.00676357		0.641424	0.00578776
0.643147	0.00424331		0.647887	0.00620484		0.63646	0.0054837		0.645521	0.00563003		0.636964	0.00754272		0.643101	0.00499977		0.640878	0.00647591		0.642392	0.00547331		0.644244	0.00527352		0.641501	0.00578713		0.645696	0.00473489		0.639978	0.00494813		0.646309	0.00406026		0.645232	0.00615377		0.640537	0.00512821		0.645491	0.00544675
0.647522	0.0042773		0.655386	0.00565252		0.644583	0.00440306		0.651461	0.00529369		0.644153	0.00708942		0.647476	0.00484559		0.648691	0.00566639		0.646455	0.00547376		0.652057	0.00523026		0.646185	0.00454588		0.652258	0.00479104		0.646852	0.005055		0.650681	0.0038752		0.649299	0.0048189		0.648971	0.00471601		0.649549	0.00356835
0.653459	0.00430361		0.66226	0.00573836		0.651459	0.00410631		0.654898	0.00559557		0.652277	0.00661955		0.652474	0.00439718		0.654939	0.00536566		0.653642	0.00429239		0.657371	0.00384045		0.653685	0.00434976		0.66007	0.00383351		0.654046	0.00505238		0.656308	0.00353433		0.65367	0.00424259		0.655536	0.0042828		0.656736	0.00344556
0.661271	0.00474714		0.666949	0.0059041		0.655209	0.00396842		0.66052	0.00371845		0.657278	0.00586301		0.660599	0.00364811		0.659315	0.00559578		0.661142	0.00427223		0.661744	0.00300269		0.660559	0.00394782		0.665384	0.00411155		0.659356	0.00436114		0.66412	0.00446645		0.660857	0.00482889		0.658973	0.00438903		0.663923	0.00481135
0.668146	0.00443157		0.671637	0.00729149		0.659898	0.00446692		0.66802	0.00368376		0.660715	0.00553627		0.667786	0.00378859		0.664627	0.00487852		0.666143	0.00295666		0.667995	0.00392112		0.665251	0.00398634		0.669756	0.00389057		0.663728	0.00435765		0.670994	0.00360237		0.668044	0.0034918		0.663974	0.00469358		0.668928	0.00429655
0.672522	0.0032809		0.678824	0.00619826		0.667397	0.00325622		0.674585	0.00335861		0.667278	0.00440219		0.671848	0.00364854		0.672439	0.00401458		0.670514	0.00355485		0.675807	0.00410453		0.669936	0.00332599		0.676008	0.00348664		0.670289	0.00369132		0.67537	0.00433151		0.672736	0.00206502		0.671474	0.00385785		0.6733	0.00427466
0.677835	0.00319543		0.686636	0.00582836		0.674271	0.00386852		0.678961	0.00318012		0.67509	0.00453335		0.676224	0.00279669		0.679628	0.00364324		0.677392	0.00434862		0.68237	0.0037163		0.677123	0.00286726		0.683821	0.00363879		0.678102	0.00348437		0.680371	0.00446622		0.677421	0.00229723		0.678035	0.00326835		0.680174	0.0032026
0.685334	0.00263195		0.691946	0.00484358		0.67896	0.00366011		0.684271	0.00267473		0.680402	0.00462632		0.683411	0.00374191		0.684002	0.00366194		0.685205	0.00341146		0.686744	0.00396754		0.684935	0.00261919		0.690069	0.00327176		0.684358	0.0025971		0.687871	0.00364909		0.684295	0.00284601		0.682723	0.00270434		0.688299	0.00259522
0.692521	0.00168		0.696322	0.00448092		0.683646	0.00207646		0.69177	0.00347058		0.684778	0.00375835		0.690598	0.00343483		0.68869	0.00418522		0.690828	0.0035311		0.692058	0.00288259		0.68994	0.00283777		0.694444	0.00264639		0.688417	0.00280799		0.69537	0.00346289		0.692107	0.00325448		0.688033	0.00346241		0.693922	0.00262389
0.69721	0.00178868		0.7032	0.00427391		0.691148	0.00228918		0.69927	0.0025902		0.691028	0.00362845		0.695599	0.00181335		0.696502	0.00360541		0.695203	0.00355485		0.69987	0.00266696		0.694312	0.00278692		0.699758	0.00252843		0.694352	0.00246817		0.700059	0.00320027		0.69773	0.00252677		0.695224	0.0031326		0.697989	0.00289618
0.701897	0.00171007		0.711012	0.00489736		0.69896	0.00313066		0.703958	0.00194166		0.698841	0.00241211		0.700287	0.00230844		0.704002	0.00232578		0.701455	0.00312357		0.706744	0.00266042		0.701186	0.00228395		0.707571	0.00271839		0.702165	0.00194652		0.704747	0.00208059		0.701796	0.00272701		0.702724	0.00199774		0.704237	0.00399669
0.709709	0.00256674		0.716948	0.00557525		0.703959	0.0024118		0.708334	0.00233202		0.705402	0.00226437		0.707161	0.00280525		0.70869	0.00254371		0.709268	0.00238962		0.71112	0.00306218		0.709311	0.00146885		0.714445	0.00226238		0.708734	0.00280996		0.712247	0.00178055		0.708045	0.00336082		0.707721	0.00245645		0.712362	0.00308638
0.717209	0.00270614		0.721011	0.00432879		0.708335	0.00213131		0.715834	0.0025217		0.709777	0.00414742		0.715286	0.00244635		0.713377	0.00261915		0.715516	0.00171413		0.716432	0.00232446		0.714934	0.0013086		0.71882	0.00133746		0.712792	0.00233508		0.720059	0.00114576		0.71617	0.00318167		0.712097	0.00194037		0.718298	0.00288042
0.721272	0.0024664		0.727259	0.00386143		0.714896	0.00213503		0.723646	0.00215374		0.715089	0.00304987		0.720913	0.00265921		0.720878	0.00247877		0.719579	0.00123222		0.724244	0.00217912		0.719	0.0018534		0.72413	0.00152856		0.718415	0.00278527		0.724434	0.00138888		0.722106	0.00284601		0.718971	0.00144979		0.722364	0.00217279
0.725334	0.00267493		0.735384	0.00420037		0.723021	0.00180302		0.728647	0.00202377		0.722902	0.00318963		0.724976	0.00257933		0.728691	0.00232788		0.725515	0.00132699		0.731433	0.00247791		0.725874	0.00176491		0.731943	0.00142282		0.726853	0.00222472		0.728184	0.00202004		0.726172	0.00243975		0.727096	0.0010959		0.7283	0.00187731
0.732522	0.00285191		0.741011	0.00492765		0.728646	0.00152978		0.733023	0.00232609		0.730091	0.0038148		0.731224	0.00185853		0.733064	0.00208011		0.73364	0.000829621		0.735183	0.00140783		0.734	0.00215078		0.739134	0.00223703		0.733415	0.00237179		0.735058	0.00218197		0.732421	0.0019629		0.73241	0.0017083		0.736738	0.00174773
0.740022	0.00311617		0.744448	0.00425855		0.732398	0.000964486		0.74021	0.00296255		0.734464	0.00315773		0.739349	0.00218767		0.736814	0.00237516		0.740205	0.00123917		0.739557	0.00131793		0.73931	0.0023064		0.743196	0.00180139		0.736856	0.00129331		0.742871	0.00162656		0.740859	0.0021536		0.736785	0.00170783		0.742674	0.00166893
0.745022	0.00317108		0.750384	0.00422232		0.739272	0.00130766		0.748022	0.00271051		0.739465	0.00214895		0.745285	0.00223456		0.74369	0.00357893		0.743955	0.00135231		0.747058	0.00229765		0.743063	0.00102575		0.747568	0.00140697		0.741853	0.00152299		0.747872	0.00221916		0.746795	0.00303004		0.743659	0.00105789		0.746428	0.00132792
0.749397	0.00226849		0.758196	0.0037791		0.74771	0.000918455		0.75271	0.00177042		0.747591	0.00219889		0.749348	0.00230223		0.75119	0.00286524		0.748952	0.0011556		0.754245	0.0025748		0.748686	0.00120449		0.755071	0.00131595		0.749665	0.00202825		0.752244	0.00161771		0.750235	0.00233652		0.751785	0.000966055		0.751738	0.00155424
0.756272	0.00157786		0.764136	0.00430969		0.753022	0.00123616		0.756773	0.00182047		0.754777	0.00257936		0.7556	0.00265599		0.756502	0.00219023		0.756765	0.00157971		0.758933	0.00213812		0.756499	0.0015164		0.761946	0.00109497		0.756227	0.00215894		0.758809	0.00168597		0.755546	0.00304669		0.756786	0.000935364		0.759237	0.00111408
0.764084	0.00219838		0.768511	0.00489077		0.756772	0.00122108		0.763334	0.00180774		0.758527	0.00231285		0.764038	0.00222664		0.760877	0.00233524		0.76333	0.00167605		0.76362	0.000997291		0.762747	0.0008928		0.766947	0.00155211		0.760606	0.00234141		0.766934	0.000931663		0.763358	0.0034696		0.760536	0.00174348		0.765799	0.00160021
0.770022	0.0018297		0.773821	0.00366451		0.762709	0.000978588		0.770834	0.0010457		0.762903	0.00231327		0.769661	0.0016476		0.76744	0.00214526		0.768018	0.00140585		0.770496	0.0010009		0.766814	0.00134052		0.771631	0.0012967		0.765603	0.00277193		0.772557	0.00071485		0.769919	0.00162835		0.766784	0.00163063		0.770491	0.00188409
0.774084	0.00154485		0.781947	0.0041523		0.770522	0.00110238		0.776148	0.00147776		0.770402	0.00219092		0.773098	0.00205576		0.775253	0.0032555		0.773015	0.00103305		0.778308	0.00166133		0.772437	0.0023359		0.778509	0.00112802		0.773103	0.00147273		0.77662	0.000947085		0.774299	0.00106603		0.774284	0.0018856		0.775488	0.00106484
0.780335	0.00286989		0.789137	0.00434218		0.776459	0.00151881		0.780523	0.00209842		0.777277	0.00257496		0.778725	0.00248511		0.78119	0.00352345		0.780515	0.00133775		0.783933	0.00186277		0.780249	0.00226348		0.786321	0.000942358		0.780603	0.00113399		0.782872	0.00139749		0.779609	0.00227969		0.780223	0.00196138		0.782988	0.00119288
0.788147	0.0020111		0.793509	0.00399314		0.780835	0.00146534		0.786772	0.000777631		0.782278	0.00300034		0.786537	0.00217118		0.785564	0.00218981		0.787702	0.00122057		0.787996	0.00165659		0.787436	0.00254721		0.791944	0.00155867		0.785607	0.000983202		0.790997	0.00185425		0.787108	0.00258005		0.784286	0.00179589		0.790487	0.00138658
0.794397	0.00126212		0.798197	0.00369766		0.78646	0.00106477		0.794897	0.000753701		0.786964	0.00226668		0.792786	0.0011024		0.791502	0.0025414		0.792703	0.00102028		0.794557	0.00130396		0.791815	0.0017462		0.796007	0.00209642		0.789979	0.00180709		0.797246	0.00187149		0.794608	0.00207079		0.790222	0.00131995		0.795172	0.00103332
0.798459	0.0024847		0.80601	0.00423659		0.794272	0.000569603		0.801145	0.000337881		0.79384	0.0022373		0.797161	0.00129513		0.799314	0.00203135		0.797391	0.00158598		0.802682	0.00231049		0.796812	0.000697995		0.802568	0.00138433		0.796853	0.00150048		0.801308	0.0012342		0.799293	0.00184125		0.798034	0.00172388		0.799864	0.00150915
0.804397	0.00242113		0.813509	0.00510218		0.801459	0.0011396		0.805208	0.000993665		0.801652	0.0027567		0.802475	0.00127179		0.805877	0.00182918		0.804265	0.00154409		0.80862	0.00166899		0.804312	0.00156416		0.810694	0.00177015		0.804978	0.00159052		0.807244	0.00121901		0.803672	0.00181971		0.804599	0.00118254		0.807051	0.00112678
0.812834	0.00179554		0.818198	0.00428116		0.805834	0.00097898		0.810835	0.00091375		0.806964	0.001818		0.810288	0.00128164		0.80994	0.00198134		0.812391	0.00182503		0.812682	0.00127444		0.811812	0.00197028		0.81632	0.00288096		0.810296	0.00129221		0.815369	0.000995619		0.811171	0.00163457		0.808971	0.000633885		0.814863	0.00085537
0.818772	0.0020897		0.822886	0.00479133		0.810834	0.00106575		0.81896	0.00114713		0.811027	0.00146964		0.817474	0.000673689		0.815565	0.00174974		0.817704	0.0015181		0.818933	0.00184046		0.816496	0.00155558		0.820383	0.00150116		0.814355	0.000599887		0.821934	0.000680831		0.818984	0.00159993		0.814285	0.000656785		0.81986	0.00102588
0.822521	0.00244956		0.830386	0.0041692		0.818335	0.00108084		0.825834	0.00137875		0.81759	0.00213174		0.822163	0.00113195		0.82369	0.00295099		0.821767	0.0012013		0.827058	0.00129314		0.821188	0.000921195		0.826944	0.000884168		0.821229	0.000881582		0.825371	0.00101308		0.823981	0.00115039		0.822097	0.00112352		0.82424	0.000678518
0.827522	0.00196534		0.837885	0.00353785		0.825835	0.00186433		0.829897	0.00119762		0.825716	0.00225912		0.826851	0.00299006		0.830564	0.00373696		0.828954	0.00253972		0.832996	0.00116178		0.828688	0.000379924		0.835069	0.000560841		0.829667	0.00204683		0.830369	0.00112988		0.82836	0.00197689		0.829284	0.00216088		0.831427	0.00081247
0.835334	0.00209019		0.842261	0.00492151		0.830521	0.00127005		0.835211	0.00166635		0.831653	0.00197959		0.834351	0.00253715		0.834314	0.00273201		0.837079	0.0019487		0.836433	0.00113068		0.836501	0.000890819		0.840696	0.00114727		0.834664	0.00184096		0.838181	0.00099267		0.835547	0.00176754		0.83366	0.00163441		0.839239	0.00134346
0.841897	0.002293		0.846323	0.00508461		0.83521	0.00138033		0.843336	0.00183145		0.835714	0.00200414		0.84185	0.00189858		0.839002	0.00201433		0.84208	0.00100415		0.842058	0.000969802		0.840559	0.00130442		0.844446	0.00175973		0.838418	0.00128784		0.844746	0.00143628		0.84336	0.00165677		0.838661	0.00101186		0.844236	0.00106856
0.846584	0.00217583		0.853198	0.00366868		0.842709	0.00169118		0.850523	0.00151048		0.841964	0.00248745		0.846848	0.00137307		0.846502	0.00246637		0.84583	0.00160615		0.849557	0.00151915		0.844626	0.00111666		0.850069	0.00120682		0.844667	0.00120611		0.849434	0.00145986		0.848044	0.00179263		0.846473	0.000769869		0.847677	0.000550913
0.851585	0.00190879		0.860697	0.00530238		0.850522	0.00142812		0.854273	0.00135548		0.850402	0.0016243		0.851223	0.00139941		0.853378	0.00215135		0.852079	0.00143207		0.85612	0.001783		0.8515	0.000871229		0.857881	0.00126795		0.852166	0.00131756		0.854432	0.000936426		0.851485	0.00190096		0.853973	0.00111314		0.854239	0.00119791
0.859397	0.00168523		0.866011	0.00498407		0.854897	0.00129982		0.858648	0.00168743		0.85634	0.00151643		0.858414	0.00167651		0.857751	0.00196347		0.859891	0.00122819		0.860496	0.00138733		0.859	0.00131367		0.864134	0.00111285		0.858102	0.000991725		0.861619	0.00115483		0.858046	0.00212851		0.858035	0.00131475		0.862051	0.00159233
0.866897	0.00170484		0.870387	0.00450946		0.85896	0.000783302		0.866148	0.00176669		0.859777	0.0013496		0.866535	0.00218981		0.862752	0.00234953		0.865518	0.00187432		0.865808	0.00122104		0.86431	0.00186616		0.868509	0.00125595		0.862168	0.000343979		0.869122	0.00143696		0.865859	0.00197422		0.862098	0.00161741		0.867674	0.00099961
0.871584	0.00131573		0.876635	0.00510854		0.865834	0.000195091		0.873022	0.000939437		0.865402	0.00174098		0.871224	0.00113109		0.869939	0.00302013		0.869889	0.00147553		0.873308	0.000852858		0.868689	0.00174796		0.873819	0.00160758		0.868104	0.00037064		0.874119	0.00148935		0.871482	0.00161836		0.869285	0.00182941		0.872053	0.00101012
0.876271	0.00185584		0.88476	0.00451363		0.873334	0.000642664		0.878023	0.000965782		0.873214	0.0026461		0.874973	0.00107884		0.877752	0.00225685		0.875829	0.00140563		0.880494	0.00136074		0.87525	0.0010022		0.881632	0.00113165		0.875917	0.00176185		0.878495	0.000818267		0.875548	0.00224906		0.876785	0.00271898		0.877989	0.00127124
0.883146	0.00205849		0.8907	0.00485477		0.878648	0.00086028		0.882708	0.0017421		0.879465	0.00258251		0.881539	0.00190607		0.882753	0.00218203		0.883641	0.000837911		0.885183	0.0011726		0.883376	0.000947169		0.888819	0.00144433		0.882791	0.00138203		0.885369	0.00110584		0.881797	0.00189142		0.881786	0.00171539		0.886114	0.000266811
0.890959	0.00141231		0.894759	0.0040129		0.883021	0.000972125		0.889585	0.00131837		0.88384	0.00248388		0.889038	0.0030528		0.887127	0.00327336		0.890516	0.00117151		0.890182	0.00115277		0.888998	0.00107924		0.893194	0.000923792		0.88717	0		0.893494	0.00132991		0.889922	0.00139303		0.886161	0.00231645		0.892363	0.00103266
0.896272	0.00151184		0.900698	0.00290079		0.889584	0.000784673		0.897398	0.000748652		0.889152	0.00292857		0.894348	0.00269433		0.894002	0.00252458		0.894578	0.00172668		0.897371	0.000181612		0.893065	0.000904686		0.898195	0.000949604		0.892167	0.00158943		0.898808	0.00100015		0.896171	0.00184014		0.892722	0.00178054		0.896734	0.00110358
0.900646	0.00118058		0.908823	0.00290869		0.897397	0.000472841		0.903021	0.000988395		0.896652	0.00251452		0.898724	0.00227589		0.902128	0.00200172		0.899892	0.00142691		0.905183	0.00112956		0.899313	0.00121241		0.905695	0.000954585		0.89998	0.00209578		0.902871	0.00117456		0.90055	0.00262379		0.900848	0.000706835		0.902052	0.00167309
0.907834	0.0017238		0.915385	0.00432111		0.903334	0.000763518		0.907083	0.00171399		0.903841	0.00235838		0.905289	0.00186196		0.90744	0.00174953		0.907705	0.00179389		0.909869	0.00172239		0.907439	0.0019804		0.913194	0.00144569		0.907167	0.00200356		0.909745	0.000575372		0.90586	0.00106426		0.906783	0.000463432		0.909864	0.00088273
0.915647	0.00221865		0.919447	0.00340679		0.90771	0.000720426		0.913649	0.00246155		0.908527	0.00289562		0.91341	0.0011827		0.911502	0.00191934		0.914891	0.00206386		0.914245	0.00146777		0.913687	0.00160026		0.917883	0.000594351		0.911859	0.00173672		0.91787	0.000810102		0.913985	0.000787203		0.910533	0.00108764		0.916739	0.00161356
0.920647	0.00205849		0.925074	0.00375759		0.913647	0.000766849		0.92177	0.0012569		0.913215	0.00295543		0.919663	0.00123238		0.918377	0.00313718		0.919267	0.00155843		0.921745	0.00110973		0.918059	0.00199977		0.922258	0.000559709		0.916543	0.00172732		0.923184	0.00133422		0.920859	0.0012938		0.916786	0.00173073		0.92111	0.00186702
0.924397	0.00219854		0.933199	0.00415778		0.921773	0.00153389		0.92771	0.00102879		0.920715	0.0023416		0.923725	0.00169236		0.926815	0.00184263		0.924268	0.000748071		0.929557	0.000789766		0.923689	0.00173453		0.929758	0.00125663		0.924356	0.00219499		0.926621	0.00136075		0.924918	0.00189186		0.925224	0.00167974		0.926428	0.00204825
0.930647	0.00177511		0.939761	0.00404253		0.928021	0.00143478		0.931772	0.00149555		0.928215	0.00164655		0.929348	0.00201207		0.932127	0.00191661		0.93208	0.00113073		0.934245	0.00241144		0.931815	0.00091173		0.93757	0.00159762		0.931855	0.00125222		0.93287	0.00102102		0.930236	0.00207989		0.931159	0.00102956		0.93424	0.0012986
0.93846	0.00110605		0.94351	0.00356331		0.932084	0.00148825		0.938021	0.00198338		0.933216	0.00211243		0.937473	0.00153068		0.935566	0.0021461		0.93958	0.00145537		0.937995	0.0023497		0.938376	0.00189632		0.941946	0.00163792		0.935914	0.001219		0.940369	0.00084072		0.938361	0.00195913		0.935222	0.0020197		0.941427	0.0012662
0.944084	0.00116668		0.948512	0.00381094		0.937709	0.00122931		0.946459	0.00182311		0.937589	0.00265198		0.944351	0.00191678		0.941503	0.00145889		0.94333	0.00145604		0.944557	0.00133889		0.941809	0.00149262		0.945696	0.00175905		0.939981	0.00137548		0.946309	0.000973166		0.945235	0.00209232		0.941162	0.00190945		0.945173	0.00130254
0.948459	0.00153308		0.956011	0.00348165		0.946147	0.000375491		0.952085	0.00111485		0.945089	0.00180436		0.94841	0.00176838		0.949316	0.0017964		0.947705	0.00183287		0.952058	0.000494815		0.946814	0.00119348		0.95257	0.00142124		0.947167	0.00211916		0.950684	0.00141836		0.948981	0.0026673		0.949596	0.000967235		0.949865	0.000995889
0.954396	0.00123058		0.962885	0.00415691		0.95271	0.000959589		0.955522	0.0017421		0.952901	0.00257811		0.953724	0.00128292		0.955253	0.00180859		0.955205	0.0011612		0.95737	0.00151081		0.954627	0.000888838		0.960069	0.00191234		0.954667	0.00201077		0.95662	0.000852966		0.953673	0.00178863		0.955848	0.00065348		0.957052	0.00078139
0.962522	0.00129481		0.967261	0.00325444		0.95646	0.00113842		0.961145	0.00237505		0.95759	0.00202849		0.961849	0.00184033		0.959314	0.00151731		0.962392	0.00112715		0.961746	0.0020383		0.961501	0.000887077		0.965383	0.00173505		0.959664	0.0014017		0.964432	0.000576506		0.961173	0.00143388		0.959285	0.00133364		0.964239	0.00124191
0.969084	0.0014852		0.972262	0.00388184		0.961459	0.00106027		0.968958	0.00172585		0.961339	0.00264169		0.968723	0.00155788		0.964941	0.00165728		0.96708	0.00200225		0.968307	0.00226926		0.965872	0.00130266		0.969759	0.000969076		0.964044	0.00159227		0.970994	0.00158006		0.968047	0.00189386		0.964599	0.00124629		0.968924	0.00162735
0.973459	0.00111864		0.979762	0.00459354		0.968959	0.000462851		0.974897	0.00158073		0.968215	0.00221757		0.972473	0.00213071		0.972753	0.00156733		0.971452	0.00170293		0.976119	0.00162054		0.970877	0.00145322		0.97632	0.000787487		0.970605	0.00170656		0.975369	0.00196107		0.972732	0.00271259		0.972099	0.002023		0.973616	0.000474962
0.978771	0.00185584		0.987261	0.0046291		0.975522	0.000519655		0.979273	0.00164374		0.975715	0.00271661		0.977162	0.00151569		0.97994	0.00191556		0.97833	0.000808562		0.98237	0.0011602		0.978064	0.00157341		0.984133	0.00123806		0.97873	0.00110318		0.980683	0.00200621		0.977424	0.00345805		0.97866	0.002023		0.98049	0.00104295
0.986584	0.00197139		0.992262	0.00620484		0.98021	0.00110219		0.984896	0.00179369		0.981027	0.00197707		0.984661	0.0019973		0.984315	0.0026864		0.986455	0.000922822		0.986745	0.00146484		0.985877	0.00161325		0.990381	0.00145701		0.984353	0.00143536		0.988495	0.00158074		0.984298	0.00231743		0.983035	0.00167289		0.988615	0.00149011
0.993459	0.00115002		0.996634	0.00629134		0.985209	0.000521418		0.992708	0.00192015		0.985403	0.00184066		0.991848	0.00190928		0.989315	0.00260171		0.992078	0.00136284		0.99237	0.000893416		0.990874	0.0015558		0.994757	0.00178804		0.988732	0.000865629		0.995682	0.00233755		0.992423	0.00197733		0.988037	0.000983053		0.993925	0.000534059
0.997834	0.00191255		1.00351	0.0053037		0.992396	0.00102246		0.999895	0.00240315		0.991653	0.0026547		0.996536	0.00158165		0.996814	0.00267169		0.996141	0.00088832		1.00018	0.000935552		0.99494	0.00157187		1.00038	0.000839564		0.994668	0.000885953		1.00006	0.00171773		0.997733	0.00191384		0.995849	0.00101304		0.997984	0.0007676
1.00315	0.0010652		1.01164	0.0048596		1.00021	0.00140403		1.00458	0.00182596		0.999776	0.00221169		1.00122	0.00180757		1.00431	0.00330762		1.00239	0.000798032		1.00706	0.00177174		1.00213	0.00149945		1.0082	0.000556313		1.00279	0.00169389		1.00475	0.00227178		1.0018	0.00162058		1.00304	0.00201049		1.00455	0.00107381
1.01096	0.0014249		1.01695	0.00469759		1.00521	0.00228664		1.00927	0.00177964		1.00603	0.00264505		1.00841	0.00133646		1.009	0.00269754		1.01051	0.000891905		1.01112	0.0021629		1.00994	0.001965		1.01476	0.00143346		1.00904	0.00157478		1.01256	0.00123466		1.00836	0.00148494		1.00772	0.00138463		1.01268	0.000780514
1.01815	0.0022528		1.02132	0.00479352		1.00927	0.00203181		1.01677	0.002206		1.01009	0.00268408		1.01622	0.000872626		1.01369	0.00252143		1.01645	0.00228006		1.01643	0.00183055		1.01525	0.000749283		1.01913	0.000798808		1.01311	0.00135144		1.02006	0.00095593		1.01649	0.00210165		1.01241	0.0012876		1.01861	0.000846396
1.02221	0.00197923		1.02788	0.00578424		1.01615	0.00170607		1.02458	0.00185297		1.01571	0.00257601		1.02154	0.000912028		1.02119	0.00299176		1.02052	0.00196573		1.02456	0.00187967		1.01962	0.00139665		1.02476	0.000693976		1.01904	0.00106603		1.02443	0.000935972		1.02242	0.00212895		1.01991	0.00148686		1.02267	0.00125351
1.02658	0.00173769		1.03601	0.00540709		1.02427	0.00182222		1.02927	0.00203102		1.02384	0.00265366		1.02591	0.00164246		1.029	0.00269418		1.02676	0.00176073		1.03143	0.00180463		1.0265	0.00198591		1.03288	0.000683108		1.02717	0.000803345		1.0285	0.00100469		1.02617	0.00266574		1.02772	0.000715334		1.02893	0.00223145
1.03377	0.000997868		1.04132	0.00522335		1.02958	0.00144869		1.03365	0.0016815		1.0304	0.00151559		1.03247	0.00156452		1.03307	0.00131872		1.0352	0.00133035		1.03518	0.00224334		1.03462	0.00114638		1.03945	0		1.03342	0.000886827		1.03568	0.000724828		1.03274	0.00263977		1.03272	0.000906326		1.03736	0.00138549
1.04096	0.00039042		1.04476	0.00557283		1.03365	0.000492036		1.04115	0.0013243		1.03447	0.00183962		1.0406	0.00115037		1.03713	0.00204123		1.04114	0.00116837		1.03987	0.00256623		1.03963	0.00117895		1.0432	0.000297062		1.03716	0.000938401		1.04287	0.00106865		1.04086	0.00238026		1.03678	0.00113226		1.04299	0.00107184
1.04565	0.00203512		1.05101	0.00474216		1.04052	0.000726302		1.04896	0.00160422		1.04009	0.00268199		1.04622	0.000966848		1.044	0.00300205		1.04458	0.0014482		1.04737	0.00150608		1.04337	0.00121373		1.0482	0.00167777		1.04217	0.00101183		1.04787	0.00171614		1.04648	0.00192649		1.04397	0.000451156		1.04642	0.0012975
1.05033	0.00130543		1.05851	0.00422474		1.04896	0.000886136		1.05334	0.00115064		1.04822	0.0025716		1.05029	0.000803244		1.0515	0.00273327		1.0502	0.00150488		1.05424	0.000472959		1.04963	0.0014836		1.05538	0.00167143		1.04998	0.00110143		1.05225	0.00223459		1.05023	0.00149227		1.0521	0.00130696		1.05205	0.000990636
1.05721	0.0012265		1.06445	0.00431145		1.05396	0.00141676		1.0574	0.00131376		1.05509	0.00317096		1.05685	0.00126022		1.0565	0.00245418		1.0577	0.00191891		1.05862	0.000648713		1.05744	0.00190402		1.06226	0.000915188		1.05654	0.00213162		1.05912	0.00184927		1.05586	0.00107092		1.0571	0.00183484		1.05987	0.00153257
1.06533	0.000878568		1.06851	0.00517572		1.0574	0.000923352		1.06427	0.00156185		1.05884	0.00321314		1.06498	0.00184611		1.06088	0.00225054		1.06427	0.00108368		1.06331	0.00134632		1.06306	0.00126964		1.06695	0.000120908		1.06091	0.00163423		1.06693	0.000569022		1.06367	0.00166653		1.06053	0.00138746		1.06611	0.00132968
1.07096	0.00119005		1.07445	0.00432352		1.06365	0.000817188		1.07146	0.00150389		1.06353	0.00200855		1.0706	0.00185296		1.06775	0.00122373		1.06864	0.000704383		1.07081	0.00125822		1.06743	0.00142174		1.07163	0.000543407		1.06592	0.00108591		1.07287	0.00169527		1.06992	0.00199309		1.0671	0.00197508		1.07049	0.00117384
1.07502	0.00222551		1.08257	0.00337628		1.07146	0.00126006		1.07677	0.00125558		1.07103	0.00255544		1.07404	0.00157758		1.07556	0.00187016		1.07364	0.00118338		1.07862	0.000705945		1.07337	0.00164032		1.07882	0.00126546		1.07342	0.00151556		1.07693	0.00194996		1.07429	0.00150314		1.07491	0.00213632		1.0758	0.000996983
1.08127	0.00191697		1.08914	0.00349043		1.0774	0.000427006		1.08115	0.00171399		1.0779	0.00317683		1.07998	0.000930444		1.08119	0.0021358		1.08145	0.00160346		1.08362	0.00152816		1.08118	0.00122782		1.08663	0.00150795		1.08092	0.00141263		1.08318	0.000947992		1.07961	0.00141723		1.08022	0.00103664		1.0833	0.000622923
1.0894	0.00134792		1.09351	0.00353148		1.08177	0.000736684		1.08771	0.00128895		1.08259	0.00281818		1.08779	0.00163583		1.08557	0.00218518		1.08895	0.00153625		1.08799	0.00169129		1.08806	0.0014803		1.09194	0.00136939		1.08592	0.000584807		1.091	0.000885851		1.08742	0.000863792		1.0846	0.00136952		1.0908	0.000907681
1.09533	0.00158113		1.09851	0.00388667		1.0874	0.000731787		1.09583	0.00196011		1.08728	0.00266142		1.09372	0.00232086		1.0915	0.00197776		1.09364	0.00117576		1.09487	0.00119806		1.09212	0.00203235		1.09601	0.00157633		1.09029	0.000819954		1.09724	0.00036627		1.09461	0.00171693		1.09085	0.00131664		1.09549	0.00142839
1.0994	0.00196926		1.10632	0.00526967		1.09521	0.000658334		1.10208	0.00207976		1.09446	0.00201988		1.0981	0.00219345		1.09963	0.00163563		1.09802	0.000957997		1.10268	0.000768586		1.09743	0.00217059		1.10288	0.00131572		1.09748	0.000899502		1.10131	6.84913e-05		1.09898	0.00185434		1.09866	0.00032131		1.09986	0.00121039
1.10565	0.00134302		1.11351	0.00399512		1.10208	0.000922764		1.10615	0.00173046		1.10228	0.00205283		1.10341	0.00123667		1.10619	0.00174134		1.10552	0.00123693		1.10831	0.00162009		1.10525	0.00283512		1.11101	0.000899339		1.10529	0.00180687		1.10725	0.00108951		1.10367	0.00155931		1.10522	0.00114902		1.10736	0.000588559
1.11408	0.000970576		1.1182	0.00428972		1.10646	0.000674591		1.11177	0.00264772		1.10759	0.00130343		1.11123	0.00155895		1.11025	0.00205006		1.11333	0.000784366		1.11237	0.0013693		1.11243	0.00178208		1.11632	0.00115746		1.1106	0.00140411		1.11537	0.00187535		1.11149	0.00177198		1.10929	0.00160207		1.11487	0.000688586
1.12002	0.0015893		1.12289	0.00371676		1.11177	0.00148179		1.1199	0.00179171		1.11196	0.00138108		1.11841	0.00102617		1.11588	0.00210196		1.11833	0.000488184		1.11893	0.000763178		1.11681	0.00139687		1.12038	0.00154214		1.11467	0.00116612		1.12162	0.00122853		1.11899	0.00084692		1.1146	0.00158554		1.11986	0.00151419
1.12346	0.00140855		1.1307	0.0050271		1.11958	0.00185415		1.12646	0.000851618		1.11853	0.00127405		1.12279	0.00140562		1.12431	0.00154779		1.1227	0.000499386		1.12706	0.0010739		1.1215	0.00117345		1.12694	0.00152403		1.12186	0.00134838		1.12537	0.00150976		1.12367	0.0014694		1.12241	0.00175481		1.12424	0.00152951
1.12877	0.00154812		1.1382	0.00466818		1.12677	0.000588994		1.13052	0.00192103		1.12665	0.00165158		1.12779	0.00167544		1.13088	0.00167808		1.12989	0.00102767		1.13268	0.000760699		1.12931	0.000921416		1.13538	0.00135693		1.12967	0.000926164		1.13037	0.00160161		1.12804	0.001974		1.1296	0.00114453		1.13173	0.000768695
1.13658	0.00166055		1.14257	0.00447983		1.13115	0.000386656		1.13615	0.0016725		1.13197	0.00236552		1.1356	0.00177138		1.13432	0.00188719		1.13802	0.00139936		1.13643	0.00131725		1.13681	0.00247523		1.1407	0.000752392		1.13467	0.000917203		1.13818	0.000753178		1.13554	0.00140746		1.13397	0.000568017		1.13923	0.000451324
1.14315	0.00180698		1.14664	0.0043637		1.13615	0.00214796		1.14458	0.00115898		1.13603	0.00241777		1.1431	0.00229774		1.13931	0.00146688		1.14302	0.000975024		1.14206	0.00166223		1.14088	0.00276887		1.14413	0.00105149		1.13842	0.00197471		1.14475	0.00136325		1.14336	0.00171315		1.13897	0.00106639		1.14393	0.000167003
1.14752	0.00203626		1.15382	0.00485697		1.14396	0.00226862		1.15115	0.00232236		1.1429	0.00232628		1.14779	0.00125722		1.14681	0.00206329		1.14645	0.00178247		1.14987	0.00187764		1.14493	0.00102465		1.15007	0.00154916		1.14498	0.00115694		1.14912	0.00125598		1.14773	0.00174601		1.14679	0.00159498		1.14767	0.0003896
1.15252	0.00172363		1.16101	0.00507034		1.15146	0.001187		1.15458	0.00168655		1.15103	0.00158296		1.15216	0.00132853		1.15338	0.00267632		1.15302	0.00137606		1.15581	0.000861645		1.15212	0.00162623		1.15788	0.00171943		1.15248	0.00160582		1.15412	0.00127593		1.15148	0.0015178		1.15397	0.00196988		1.15423	0.000613949
1.16033	0.00184097		1.16601	0.00513927		1.15552	0.00105518		1.15959	0.000985761		1.15665	0.0023651		1.15966	0.00144053		1.15807	0.00302265		1.16083	0.000844856		1.16018	0.000951325		1.15962	0.00163328		1.16382	0.00195106		1.15811	0.00121813		1.16162	0.000703283		1.15836	0.0012312		1.15803	0.00122433		1.16205	0.000907025
1.16752	0.00151641		1.17039	0.00358373		1.15958	0.000960372		1.16709	0.00153989		1.16009	0.00241924		1.16747	0.000721442		1.16306	0.00218119		1.16614	0.000823573		1.16581	0.00241369		1.16463	0.00134492		1.16788	0.00051601		1.16248	0.000959381		1.16912	0.00102714		1.16586	0.00142456		1.16241	0.00049129		1.16736	0.00123293
1.17221	0.00154387		1.17726	0.00305116		1.16677	0.000861064		1.17396	0.00136316		1.16603	0.00198421		1.17185	0.000559765		1.17056	0.00136558		1.17051	0.00118293		1.17362	0.00151036		1.169	0.0014946		1.17351	0.00134901		1.16842	0.00126468		1.17381	0.000979516		1.17117	0.00138948		1.1696	0.000829127		1.17142	0.00173591
1.1769	0.00189		1.18507	0.00386955		1.17427	0.00122539		1.17865	0.00106677		1.17384	0.00151308		1.17591	0.00177737		1.17806	0.00150344		1.17708	0.00107674		1.18081	0.000867729		1.17587	0.0017506		1.18132	0.00116765		1.17623	0.00117267		1.17849	0.00141382		1.17554	0.00195491		1.17678	0.00110771		1.17798	0.0013647
1.1844	0.00207434		1.19101	0.00442955		1.17927	0.00131765		1.18334	0.000991908		1.17978	0.00188159		1.18279	0.00164932		1.18307	0.000917113		1.18489	0.00122416		1.18518	0.000937806		1.184	0.00134844		1.18851	0.000780921		1.18311	0.000778869		1.18568	0.00175447		1.1821	0.00220932		1.18178	0.000947168		1.1858	0.00119441
1.19221	0.00124938		1.19507	0.00408249		1.18396	0.00104714		1.19052	0.000920775		1.18415	0.00192461		1.19029	0.00179343		1.18744	0.00200802		1.19114	0.00115605		1.18987	0.000983772		1.18963	0.00186506		1.19288	0.00148237		1.18717	0.0012378		1.1935	0.000875192		1.18992	0.00229257		1.18647	0.0013072		1.19205	0.0012778
1.19721	0.00108285		1.20132	0.00457993		1.19052	0.000271874		1.19834	0.00135723		1.18978	0.00263141		1.1956	0.00138978		1.19463	0.0025809		1.19552	0.000878462		1.19768	0.00145267		1.19369	0.00221329		1.19788	0.00146697		1.19248	0.00177409		1.19849	0.00058331		1.19617	0.00316191		1.19335	0.00141745		1.19611	0.000910527
1.20158	0.00145186		1.20945	0.00567184		1.19865	0.000694963		1.20365	0.000728234		1.19759	0.00291598		1.19997	0.00116707		1.20244	0.00228753		1.20114	0.00120803		1.20518	0.000884178		1.19993	0.00156174		1.20569	0.00154984		1.20061	0.00150267		1.20256	0.000771321		1.20023	0.00266597		1.20085	0.000164314		1.20205	0.000729516
1.20877	0.00178459		1.2157	0.00480055		1.20458	0.000716313		1.20802	0.00181301		1.20478	0.00253613		1.20654	0.00148015		1.20775	0.00122163		1.20895	0.00131512		1.20956	0.000936679		1.20806	0.00136165		1.21288	0.00157792		1.2078	0.00159664		1.20974	0.00122105		1.20617	0.00135951		1.20647	0.00195572		1.20986	0.00139862
1.21658	0.00174357		1.21976	0.00603098		1.20865	0.000743931		1.21459	0.00205868		1.20915	0.00242785		1.21435	0.00146002		1.21181	0.00164425		1.21583	0.00178807		1.21424	0.00138958		1.21431	0.00129165		1.21757	0.00150569		1.21185	0.00109553		1.21787	0.00165604		1.21398	0.00211586		1.21054	0.00136362		1.21673	0.00106155
1.22127	0.000852747		1.2257	0.00547559		1.2149	0.00128259		1.22271	0.000899699		1.21384	0.00257244		1.22029	0.00168401		1.219	0.00240753		1.21989	0.00162989		1.22206	0.00196529		1.21837	0.00195267		1.22226	0.00174864		1.21685	0.000753082		1.22287	0.00115279		1.22055	0.00248348		1.2171	0.00128571		1.2208	0.000320873
1.22502	0.000902101		1.23382	0.00385396		1.22302	0.00105224		1.22833	0.000868743		1.22165	0.00209312		1.22435	0.00105058		1.22713	0.00257775		1.2252	0.00159158		1.22956	0.00238282		1.22431	0.00207836		1.22976	0.0013352		1.22498	0.00150638		1.22662	0.000668811		1.22461	0.00200774		1.22522	0.0015735		1.22611	0.000430093
1.23158	0.00112158		1.24007	0.00329264		1.22896	0.000740209		1.2324	0.00151377		1.22915	0.00237056		1.23029	0.00155574		1.23213	0.00237537		1.23333	0.00162205		1.23393	0.001242		1.23244	0.00187013		1.23757	0.00107278		1.23217	0.0012343		1.23287	0.000459028		1.23023	0.00127893		1.23116	0.00154375		1.23424	0.00183922
1.2394	0.00125591		1.24382	0.00477026		1.23302	0.000894559		1.23896	0.001777		1.23384	0.00113218		1.23841	0.00182577		1.23588	0.00163185		1.24052	0.00134738		1.23799	0.00142947		1.23868	0.00194541		1.24163	0.00152018		1.23623	0.00104592		1.24037	0.000910572		1.23836	0.00174379		1.23491	0.000921199		1.24111	0.00197886
1.24471	0.00138567		1.24882	0.00494412		1.23927	0.000494191		1.24708	0.0017118		1.23853	0.00173616		1.24498	0.00206711		1.24213	0.00146646		1.24427	0.00103372		1.24487	0.000423162		1.24244	0.00215606		1.24569	0.00100938		1.2406	0.00198236		1.24631	0.00113555		1.24523	0.00204171		1.24116	0.000497428		1.24486	0.00100705
1.24908	0.000785907		1.25664	0.00432967		1.2474	0.0006172		1.25271	0.00145252		1.24603	0.002018		1.24904	0.00187309		1.24963	0.000632775		1.24895	0.00145783		1.25237	0.000809145		1.24775	0.00183645		1.25257	0.00148916		1.2478	0.0010798		1.25068	0.000281676		1.24898	0.0021789		1.2496	0.000916241		1.24955	0.0007989
1.25533	0.000675105		1.2632	0.00531467		1.25365	0.000845002		1.25615	0.00162288		1.25353	0.002993		1.25466	0.00151783		1.25557	0.000964818		1.25614	0.0016523		1.25737	0.00173546		1.25556	0.00193484		1.26007	0.000937151		1.25498	0.00145524		1.25662	0.00045109		1.25367	0.00197311		1.25553	0.00151023		1.25705	0.000668012
1.26346	0.000854545		1.26757	0.00524048		1.25708	0.00059918		1.26208	0.000818906		1.25821	0.00286519		1.26279	0.00151419		1.25994	0.00199794		1.26333	0.00114507		1.26174	0.00268521		1.26212	0.00154171		1.26507	0.00168909		1.25967	0.00124588		1.26443	0.000593289		1.26117	0.00186345		1.25897	0.00195619		1.26392	0.00124213
1.26971	0.00152426		1.27257	0.00551927		1.2624	0.00105537		1.2699	0.00092319		1.26196	0.00246898		1.26935	0.00250481		1.26557	0.00164446		1.26802	0.000914309		1.26831	0.00125597		1.2665	0.00183182		1.26976	0.00272722		1.26435	0.00124392		1.271	0.00116934		1.26804	0.00231543		1.2646	0.00191228		1.26861	0.000123884
1.27377	0.00186451		1.28007	0.00484928		1.2699	0.000325347		1.27583	0.00111859		1.26884	0.00268807		1.2731	0.00254143		1.27338	0.00185629		1.2727	0.00185147		1.27643	0.00208359		1.2715	0.00147039		1.27632	0.0014518		1.27123	0.00138859		1.27537	0.00215067		1.27273	0.00159305		1.2721	0.00132679		1.2733	0.000928913
1.2794	0.00171808		1.28757	0.0047292		1.27646	0.000390378		1.2799	0.00109312		1.27634	0.00226982		1.2781	0.00205576		1.28025	0.0029905		1.27989	0.0010922		1.28237	0.0020072		1.27931	0.0011171		1.28413	0.00134471		1.27905	0.00135297		1.28068	0.00112693		1.27742	0.00190585		1.27866	0.00153667		1.28049	0.000944015
1.28721	0.00106847		1.29226	0.00359844		1.28115	0.000735313		1.28583	0.000804636		1.28165	0.00180583		1.2856	0.00161313		1.28431	0.00307141		1.2877	0.000907139		1.28643	0.00113159		1.28681	0.00103147		1.29007	0.00167777		1.28467	0.00166854		1.28849	0.00079468		1.28461	0.00228768		1.28303	0.00214884		1.2883	0.000215594
1.29408	0.000931027		1.29695	0.00382894		1.28615	0.00114038		1.29365	0.00131266		1.28603	0.00196133		1.29247	0.00155167		1.28963	0.0029264		1.29302	0.000865244		1.29237	0.00139927		1.2915	0.00129165		1.29444	0.00121384		1.28873	0.00162986		1.29537	0.000422741		1.29242	0.00240268		1.28835	0.0019458		1.29362	0.000844208
1.29846	0.000867946		1.30414	0.00414527		1.29365	0.00102364		1.30052	0.000949536		1.29259	0.00245765		1.29716	0.00135787		1.29744	0.00205846		1.29708	0.00194064		1.30049	0.00151509		1.29587	0.0022036		1.30038	0.00129263		1.29529	0.00250379		1.29974	0.00136438		1.29742	0.00250435		1.29585	0.00108221		1.29799	0.000955615
1.30377	0.00115492		1.31195	0.00371874		1.30115	0.00125497		1.3049	0.000872695		1.30071	0.00229753		1.30185	0.000805172		1.30494	0.00216732		1.30364	0.00158307		1.30674	0.000844972		1.30337	0.00252762		1.30819	0.00158811		1.30341	0.00263513		1.30506	0.00139659		1.30179	0.00224861		1.30304	0.000914353		1.30455	0.000981443
1.3119	0.00136704		1.31726	0.00409127		1.30615	0.0011394		1.3099	0.00101738		1.30665	0.00273886		1.30935	0.00177523		1.309	0.0017634		1.31176	0.000858747		1.31112	0.00158607		1.31119	0.00277195		1.31476	0.0015709		1.30936	0.0023613		1.31287	0.00153584		1.30867	0.00189208		1.30772	0.00198358		1.31267	0.00077942
1.31877	0.00184342		1.32132	0.00350075		1.31052	0.000820322		1.31771	0.00148654		1.31071	0.00240266		1.31685	0.00109598		1.314	0.00135402		1.3177	0.00120803		1.31675	0.00179404		1.31618	0.00146313		1.31882	0.00178464		1.31342	0.00171399		1.32006	0.000900366		1.31679	0.00184524		1.31272	0.00239696		1.3183	0.00125504
1.32252	0.00134139		1.32851	0.00358087		1.31771	0.000792116		1.3249	0.000783559		1.31665	0.00255502		1.32185	0.00188637		1.32182	0.00181321		1.32177	0.00159606		1.32487	0.00121631		1.32025	0.00154919		1.32445	0.00123919		1.31967	0.00172383		1.32412	0.000764744		1.32211	0.00154843		1.31991	0.00148166		1.32236	0.0015387
1.32721	0.00136181		1.33663	0.00397931		1.32552	0.00103089		1.32958	0.000819565		1.32478	0.0024289		1.32623	0.00294187		1.32931	0.00252542		1.32802	0.00208134		1.33143	0.0016976		1.32744	0.00158727		1.33257	0.000549068		1.32779	0.00171268		1.3285	0.00151747		1.32617	0.00182926		1.32741	0.00190567		1.32892	0.000866095
1.33471	0.0014597		1.34164	0.00438038		1.33052	0.000499088		1.33427	0.00147293		1.33134	0.00263855		1.3331	0.00203027		1.33338	0.00249348		1.33614	0.00115694		1.33518	0.00151058		1.33588	0.000903145		1.33913	0.000394423		1.33373	0.00126686		1.33568	0.00163018		1.33304	0.00188365		1.33241	0.00240121		1.33705	0.000417617
1.34158	0.00139711		1.34538	0.00298201		1.3349	0.000653437		1.34208	0.00153485		1.3354	0.00271095		1.34122	0.00129877		1.33744	0.00174386		1.34208	0.00113835		1.33987	0.0013177		1.34087	0.00176359		1.34288	0.00169113		1.33748	0.00119934		1.34287	0.000546116		1.34117	0.000995436		1.3371	0.00141745		1.34267	0.000979692
1.34658	0.00137391		1.35164	0.00317344		1.34177	0.00147689		1.34958	0.00131113		1.34103	0.00356612		1.34685	0.00142233		1.34463	0.00193405		1.34552	0.00117196		1.34768	0.0006922		1.34431	0.00202861		1.34788	0.00159128		1.34279	0.00195023		1.34787	0.000750002		1.34679	0.00115128		1.34428	0.00169603		1.34611	0.0014216
1.35127	0.00106634		1.35914	0.00351326		1.3499	0.00120189		1.35396	0.00103867		1.34946	0.00316424		1.35091	0.00183134		1.35213	0.00205363		1.35114	0.00034323		1.35425	0		1.35087	0.00246511		1.35538	0.00152063		1.3506	0.0013357		1.35225	0.00132674		1.35023	0.00212163		1.35241	0.0018908		1.35205	0.000540844
1.35815	0.00112632		1.36507	0.00423901		1.3549	0.00130707		1.35802	0.000981151		1.35603	0.00260602		1.35779	0.00166516		1.35713	0.00165496		1.35895	0.00114193		1.35893	0.000822889		1.35869	0.00136055		1.36226	0.00164086		1.35717	0.00117377		1.35912	0.00160297		1.35617	0.00153889		1.3571	0.00183532		1.35955	0.000752936
1.36596	0.00182904		1.36914	0.00296248		1.35865	0.00165475		1.3649	0.00136558		1.35978	0.00290192		1.36591	0.000835794		1.3615	0.00217468		1.3652	0.00131825		1.36393	0.00106241		1.364	0.00177239		1.36663	0.000641673		1.36154	0.000290437		1.36725	0.00156351		1.36398	0.00232764		1.36053	0.00160513		1.3658	0.00186111
1.37158	0.00186908		1.37507	0.0032472		1.3649	0.00126221		1.3724	0.00121058		1.36478	0.00270318		1.37122	0.000840933		1.36838	0.00305375		1.36958	0.00166484		1.37112	0.000814552		1.36838	0.00136627		1.37163	0.00113368		1.36685	0.000246729		1.37287	0.00192706		1.36992	0.00284423		1.3671	0.00152817		1.37018	0.001665
1.37565	0.00101666		1.3832	0.00381116		1.37271	0.000555304		1.3774	0.00110541		1.37228	0.00190173		1.37466	0.0018065		1.3765	0.00268598		1.3752	0.00150421		1.37893	0.000743575		1.37462	0.000945408		1.37882	0.0024956		1.37435	0.000881145		1.37693	0.00212799		1.37398	0.00220088		1.37491	0.0012477		1.3758	0.00117208
1.38221	0.00106569		1.38976	0.00312888		1.37833	0.000197637		1.38177	0.000809685		1.37915	0.00144319		1.38091	0.00196603		1.38213	0.00263071		1.3827	0.0005778		1.38393	0.00104799		1.38244	0.00227734		1.38663	0.00175294		1.38154	0.00171028		1.38318	0.00127956		1.37961	0.00187144		1.38022	0.00109094		1.3833	0.000523115
1.39033	0.00114446		1.39382	0.0037813		1.38271	0.000844415		1.38865	0.00125975		1.38384	0.00254726		1.38841	0.00141976		1.38619	0.00233818		1.38989	0.00135208		1.38799	0.00162415		1.389	0.00224521		1.39163	0.000882131		1.38623	0.00144432		1.39131	0.000409134		1.38742	0.00156353		1.3846	0.0016651		1.39049	0.000425934
1.39627	0.00100097		1.39913	0.0031247		1.38865	0.00057685		1.39646	0.00157085		1.38884	0.00289415		1.39435	0.00151526		1.39244	0.00209587		1.39458	0.00157568		1.39518	0.001831		1.39338	0.00180057		1.39601	0.00111964		1.39092	0.00151032		1.39724	0.00144489		1.39461	0.00157707		1.39085	0.00181761		1.39487	0.00173613
1.40033	0.00128697		1.40726	0.0030156		1.39677	0.000538459		1.4024	0.00135943		1.39603	0.00260287		1.39841	0.00164289		1.40057	0.00200445		1.39958	0.00165947		1.403	0.0012429		1.39869	0.00169007		1.40288	0.000926962		1.3981	0.00149239		1.40131	0.00165264		1.39899	0.000962358		1.39866	0.00143515		1.39986	0.000940075
1.40658	0.00111962		1.41414	0.00362566		1.40333	0.000812095		1.40646	0.0018769		1.40353	0.00198945		1.40435	0.00257526		1.4065	0.00274462		1.40708	0.00135477		1.40831	0.00162302		1.4065	0.00185252		1.4107	0.00111783		1.40592	0.00143426		1.40756	0.0017048		1.40398	0.00146363		1.40491	0.00132183		1.40736	0.000632553
1.41502	0.00114364		1.41851	0.00323732		1.40771	0.00199243		1.4124	0.00134845		1.40853	0.00266562		1.41216	0.00182684		1.41056	0.00288752		1.41458	0.00108749		1.41268	0.0018853		1.41337	0.0016346		1.41601	0.00150546		1.41092	0.00188511		1.41568	0.000824844		1.41148	0.00218712		1.40929	0.00164975		1.41486	0.000574551
1.42065	0.000750607		1.42351	0.00317827		1.41302	0.00179597		1.42052	0.001595		1.4129	0.00283497		1.41904	0.00180692		1.41681	0.00186407		1.41927	0.0016458		1.41956	0.00128909		1.41775	0.00169601		1.42038	0.00152629		1.41529	0.00163051		1.42162	0.000930076		1.41898	0.00225705		1.41491	0.00240475		1.41955	0.000707847
1.42408	0.00120607		1.43132	0.00327486		1.42083	0.000705931		1.42708	0.0016163		1.41978	0.00215		1.42341	0.00107949		1.42494	0.00163563		1.42396	0.00143991		1.42768	0.000950874		1.42306	0.00134448		1.42726	0.00123806		1.42248	0.000959163		1.42537	0.00101535		1.42367	0.00214782		1.42272	0.00262572		1.42424	0.000509983
1.42971	0.00101094		1.43882	0.00328649		1.42771	0.00072121		1.43083	0.00144922		1.4279	0.0025332		1.42841	0.00138507		1.43119	0.00104678		1.43145	0.00072029		1.43299	0.000494139		1.43088	0.00132687		1.43538	0.000615861		1.43029	0.00107237		1.43068	0.000403691		1.42836	0.000905749		1.4296	0.00209052		1.43174	0.000610447
1.43752	0.00156184		1.44288	0.00238732		1.43208	0.000951558		1.43677	0.000485196		1.43322	0.00293549		1.43623	0.000677543		1.43463	0.00209923		1.43927	0.000250701		1.43643	0.000406713		1.43806	0.00121219		1.44038	0.00230631		1.4353	0.00109837		1.4385	0.000861358		1.43586	0.0011313		1.43366	0.0015421		1.43955	0.000421338
1.44346	0.00155956		1.44695	0.00305885		1.4374	0.000549036		1.44521	0.000124482		1.43728	0.00227654		1.44373	0.000666194		1.43994	0.0024153		1.44364	0.000814611		1.44268	0.000634743		1.44212	0.00228263		1.44382	0.0021605		1.43904	0.00130817		1.44506	0.000533416		1.44367	0.00110244		1.43897	0.0017482		1.44392	0.00108125
1.44783	0.00129955		1.45413	0.00309441		1.44521	0.00130178		1.45146	0.00124636		1.44415	0.00203646		1.44841	0.00119962		1.44775	0.00206624		1.44739	0.002382		1.45018	0.00113068		1.4465	0.00126568		1.45007	0.00122584		1.4456	0.000794167		1.44943	0.00121039		1.44804	0.000414691		1.4471	0.00166911		1.44768	0.00117296
1.45346	0.0015138		1.46163	0.00174302		1.4524	0.00107496		1.4549	0.00144571		1.45259	0.0020352		1.4531	0.00132382		1.45431	0.00211394		1.45427	0.00174505		1.45612	0.00150878		1.45369	0.0011455		1.45788	0.00105829		1.4531	0.00118295		1.45443	0.0017624		1.45211	0		1.45397	0.00174796		1.45455	0.00157066
1.46096	0.00137816		1.46632	0.00165565		1.45646	0.000486748		1.4599	0.00130608		1.45759	0.00254873		1.4606	0.00193155		1.45838	0.00228942		1.46208	0.00189829		1.46049	0.00152455		1.46088	0.00196588		1.46382	0.00113957		1.45873	0.0010127		1.46225	0.00114893		1.45898	0.00184036		1.45803	0.00227845		1.46205	0.00108016
1.46815	0.00050923		1.47101	0.00187825		1.46115	0.0011016		1.46771	0.00100574		1.46134	0.00180898		1.4681	0.0012251		1.46369	0.0034707		1.46739	0.000866813		1.46612	0.00153875		1.46587	0.00247501		1.46788	0.00107776		1.46311	0.00128522		1.46943	0.00173043		1.46648	0.000998766		1.46241	0.00240971		1.46736	0.00083195
1.47283	0.000905533		1.47788	0.00299584		1.46833	0.00154937		1.47427	0		1.46759	0.00169775		1.47247	0.00104929		1.47119	0.00275029		1.47145	0.00107315		1.47393	0.0012794		1.47025	0.00232907		1.47382	0.00139293		1.46904	0.000613873		1.47412	0.00151701		1.47148	0.00153267		1.46991	0.00160537		1.47174	0.00141351
1.47783	0.00100931		1.4857	0.00354795		1.47552	0.00141186		1.47896	0.000556329		1.47509	0.00243456		1.47654	0.00131697		1.47869	0.00203745		1.47802	0.000894369		1.48081	0.0013693		1.47713	0.00152762		1.48163	0.00189491		1.47717	0.00056951		1.47881	0.00145873		1.47586	0.00183237		1.4771	0.00221234		1.4783	0.00116617
1.48533	0.00123026		1.49132	0.00252321		1.48052	0.000701818		1.48396	0.00126173		1.48103	0.00297935		1.48341	0.0010221		1.48338	0.00262378		1.48614	0.00129025		1.48518	0.00216966		1.48525	0.000926038		1.48851	0.00137618		1.48341	0.000790014		1.486	0.00154423		1.48242	0.00154444		1.48178	0.0023377		1.48611	0.000875507
1.49283	0.00125967		1.49539	0.00179132		1.4849	0.000607799		1.49115	0.00168699		1.4854	0.00262155		1.49091	0.000597454		1.48807	0.0022394		1.49239	0.0012022		1.49018	0.00166921		1.49056	0.00155536		1.49288	0.00139814		1.48779	0.000813835		1.49381	0.00168212		1.49023	0.00210831		1.48647	0.00171963		1.49236	0.00049488
1.49783	0.00111749		1.50195	0.00273834		1.49177	0.00153193		1.49865	0.00159259		1.49103	0.00246793		1.49591	0.000191871		1.49525	0.0026366		1.49645	0.000940074		1.49799	0.00166335		1.49463	0.00312678		1.49819	0.00130803		1.4931	0.000783677		1.49881	0.00124328		1.49617	0.00267884		1.49335	0.00149158		1.49643	0.00122111
1.50221	0.00114528		1.50976	0.00277917		1.4999	0.0011915		1.50365	0.00208986		1.49884	0.00251053		1.50029	0.000316073		1.50306	0.00275891		1.50208	0.00144865		1.50518	0.00213586		1.50119	0.00293594		1.50569	0.00186162		1.50123	0.00211239		1.50318	0.000703056		1.50055	0.00266508		1.50116	0.0014132		1.50205	0.0011097
1.50971	0.000940996		1.5157	0.00243386		1.50552	0.00193739		1.50833	0.00197921		1.50571	0.00222806		1.50716	0.000510941		1.50807	0.00276626		1.51021	0.00152146		1.50987	0.00162663		1.50931	0.00124147		1.51288	0.00159716		1.5081	0.00221138		1.51037	0.00143764		1.50648	0.00259182		1.50647	0.00171161		1.51018	0.000248425
1.51752	0.00112779		1.51976	0.00253748		1.50959	0.00135036		1.51521	0.00126349		1.51009	0.00276719		1.51497	0.00130969		1.51244	0.00160621		1.51677	0.000943658		1.51456	0.00193397		1.51525	0.000923617		1.51757	0.00175475		1.51217	0.00131451		1.51818	0.00100764		1.5143	0.0018943		1.51085	0.00194911		1.51674	0.000612854
1.5219	0.000892786		1.52601	0.0029122		1.51583	0.00118739		1.52302	0.00120355		1.51509	0.00231117		1.52091	0.00192941		1.51963	0.000511726		1.52083	0.000926631		1.52237	0.00281905		1.51931	0.00160114		1.52226	0.00122289		1.51748	0.00118426		1.52318	0.00107976		1.52086	0.00197555		1.51741	0.00140045		1.5208	0.00125548
1.52596	0.000993782		1.53445	0.00264504		1.52396	0.00157561		1.52833	0.00157546		1.5229	0.00169209		1.52529	0.00174611		1.52744	0.00176025		1.52645	0.000988242		1.52987	0.00220571		1.52556	0.00148096		1.53007	0.0012247		1.52561	0.000853609		1.52662	0.00133966		1.52524	0.00160859		1.52553	0.00160891		1.52643	0.00128634
1.53252	0.00181499		1.54038	0.00122911		1.5299	0.000791137		1.53271	0.000729331		1.53009	0.00183878		1.53122	0.000933656		1.53244	0.00261264		1.53458	0.000817075		1.53425	0.00124177		1.53369	0.00174532		1.53757	0.00215212		1.53279	0.00156779		1.53318	0.00139976		1.53086	0.0024524		1.53116	0.00186152		1.53455	0.00133121
1.54033	0.00125771		1.54382	0.00204245		1.53396	0.00108828		1.53958	0.000410331		1.53478	0.00150678		1.53935	0.000742857		1.53619	0.00196662		1.54114	0.00123581		1.53831	0.000763403		1.53963	0.00176381		1.54163	0.00202193		1.53655	0.00125353		1.541	0.00124214		1.53899	0.00193226		1.53522	0.00174254		1.54111	0.000881198
1.54565	0.000732467		1.54945	0.00290364		1.54021	0.00142753		1.54771	0.000622193		1.53946	0.00217896		1.54591	0.00132232		1.54275	0.00208641		1.54489	0.00105568		1.54518	0.000918653		1.54306	0.0016018		1.54569	0.00143573		1.54092	0.00181933		1.54631	0.00202435		1.54555	0.0022031		1.54179	0.00139289		1.54486	0.00147873
1.54971	0.000435362		1.55695	0.00260224		1.54833	0.000971341		1.55302	0.00109312		1.54728	0.00268996		1.54966	0.00145081		1.55025	0.00213223		1.54989	0.000860091		1.55268	0.000904007		1.54869	0.00174114		1.55288	0.00189038		1.54842	0.00122949		1.55068	0.000974527		1.54899	0.00169007		1.54991	0.00131829		1.54955	0.00125219
1.55627	0.000278311		1.56351	0.00242245		1.55459	0.00133175		1.55646	0.00146723		1.55478	0.00348008		1.5556	0.00166945		1.55588	0.00187416		1.55739	0.000845528		1.55768	0.00144411		1.55619	0.0015668		1.56007	0.00200019		1.5556	0.00118185		1.55693	0.0011893		1.55398	0.00173713		1.55553	0.00178338		1.55736	0.00157985
1.5644	0.000650918		1.56788	0.00114152		1.55802	0.00101287		1.56271	0.000770167		1.55884	0.0024098		1.56404	0.00144181		1.56025	0.00200802		1.56427	0.00146993		1.56206	0.0010018		1.56275	0.00198195		1.56507	0.00166962		1.5603	0.00103368		1.56474	0.000909891		1.56148	0.00240712		1.55928	0.00221305		1.56424	0.00159846
1.57033	0.00094165		1.5732	0.0015865		1.56333	0.000508686		1.57021	0.000108675		1.5629	0.00331429		1.57029	0.00132661		1.56619	0.00222448		1.56895	0.00116792		1.56862	0.00208764		1.56712	0.000701737		1.56944	0.00209099		1.56498	0.000857106		1.571	0.000689903		1.56836	0.00193271		1.56491	0.0020917		1.56861	0.00142357
1.5744	0.00125019		1.5807	0.00276798		1.57115	0		1.57615	0.000999812		1.56978	0.0028037		1.57372	0.00134309		1.57432	0.00278644		1.57364	0.000837911		1.57675	0.00217327		1.57244	0.000421527		1.57632	0.00187091		1.57217	0.00180359		1.57537	0.000596691		1.57273	0.00208611		1.57272	0.00177913		1.57361	0.00133296
1.58033	0.000662031		1.58789	0.00372181		1.57771	0.000220163		1.58021	0.00128434		1.57728	0.00242911		1.57872	0.00132104		1.58056	0.0024048		1.58083	0.00085337		1.58237	0.00213564		1.58025	0.00123222		1.58444	0.00172758		1.57998	0.00144213		1.58068	0.000979516		1.57773	0.00230677		1.57866	0.00112919		1.5808	0.00134609
1.58846	0.000849805		1.59257	0.0033394		1.58208	0.000310853		1.58615	0.00146415		1.58259	0.00265764		1.58654	0.00216433		1.58494	0.00288731		1.58864	0.00115515		1.58675	0.00110117		1.58744	0.000979527		1.59007	0.00188336		1.58498	0.0012909		1.58881	0.00148073		1.58492	0.00164056		1.58303	0.00148355		1.58861	0.000940075
1.59502	0.00131132		1.59726	0.00222641		1.58708	0.000275987		1.59427	0.00118665		1.58697	0.00260308		1.5931	0.00303802		1.59025	0.00210259		1.59395	0.00109354		1.59268	0.00140851		1.59212	0.00133128		1.59413	0.00118712		1.58936	0.00164428		1.59568	0.000530468		1.59273	0.00202595		1.58866	0.00166652		1.59361	0.00165536
1.59908	0.00124578		1.60476	0.00167036		1.5949	0.00101639		1.60084	0.00146766		1.59353	0.00223457		1.59779	0.00279968		1.59838	0.00228564		1.59833	0.00153288		1.60081	0.00112708		1.59681	0.00140105		1.60038	0.00198253		1.59592	0.00154375		1.59975	0.0006738		1.59773	0.00221487		1.59616	0.00208981		1.59768	0.00183747
1.60471	0.00121833		1.61226	0.00315017		1.60208	0.000452078		1.6049	0.00198974		1.60165	0.00200016		1.60279	0.00168058		1.60525	0.00230981		1.60489	0.00121587		1.60706	0.00104123		1.60432	0.00172353		1.60851	0.00115021		1.60404	0.00150092		1.60506	0.00111673		1.60211	0.00271081		1.60335	0.00229993		1.60486	0.00116005
1.61283	0.0010214		1.61726	0.00222663		1.60677	0.000341409		1.61021	0.00108302		1.60728	0.00156827		1.61029	0.000985264		1.60963	0.00273117		1.61302	0.001629		1.61112	0.00133551		1.61181	0.00248426		1.61445	0.00154192		1.60967	0.00241441		1.61318	0.00143015		1.60898	0.00290106		1.60772	0.00230583		1.61299	0.000945547
1.6194	0.000865821		1.62163	0.00167146		1.61146	0.000483026		1.61802	0.00144834		1.61165	0.00203751		1.61779	0.00221808		1.61463	0.00258301		1.61864	0.00110385		1.61706	0.0010347		1.61681	0.0018206		1.61851	0.00135173		1.61373	0.00171946		1.62006	0.00110879		1.61711	0.00295945		1.61272	0.00181336		1.6183	0.00105061
1.62315	0.000548451		1.62882	0.0010311		1.61896	0.000390769		1.62521	0.0014007		1.6179	0.00213866		1.62279	0.00260653		1.62244	0.00281018		1.6227	0.00130302		1.62518	0.00160747		1.62118	0.00137772		1.62476	0.000523256		1.62029	0.000378726		1.62381	0.0010623		1.62242	0.00202284		1.62022	0.00246849		1.62205	0.00118456
1.62815	0.00127814		1.63695	0.00102144		1.62646	0.00110395		1.6299	0.00146086		1.62603	0.00207571		1.62716	0.00142404		1.62963	0.00245292		1.62927	0.00139219		1.63175	0.00138125		1.62868	0.00213449		1.63288	0.00145837		1.62842	0.000313165		1.62849	0.00205292		1.62649	0.00224861		1.62772	0.00223784		1.62893	0.000316714
1.63565	0.000975315		1.64163	0.00122977		1.63146	0.000985836		1.63458	0.00174297		1.63197	0.00179114		1.63435	0.00106921		1.63369	0.00215829		1.63739	0.000993395		1.63518	0.00136998		1.63681	0.00156614		1.63882	0.00128267		1.63404	0.00109728		1.63599	0.00180867		1.63336	0.00196223		1.63241	0.00196469		1.63737	0.000428342
1.64252	0.000604506		1.64538	0.00224836		1.63583	0.00139737		1.6424	0.000936143		1.63603	0.00169104		1.64216	0.000755062		1.63806	0.00192627		1.64302	0.00142691		1.64018	0.00140288		1.6415	0.00173277		1.64257	0.000602503		1.6378	0.00113727		1.64287	0.00180164		1.6418	0.00156486		1.63678	0.00144696		1.64236	0.00047343
1.64721	0.000876607		1.65195	0.00316993		1.64302	0.00140873		1.6499	0.0014389		1.64228	0.00264106		1.64748	0.000979697		1.64556	0.00205384		1.64645	0.0014175		1.64799	0.00180846		1.64525	0.0019782		1.64788	0.000948472		1.64342	0.000806186		1.64756	0.00108611		1.6468	0.00139503		1.6446	0.00140706		1.64612	0.00112043
1.6519	0.00129383		1.65945	0.00245077		1.65115	0.00049615		1.65396	0.00172168		1.6504	0.00167446		1.65185	0.0022003		1.65275	0.00170982		1.65239	0.00133371		1.65456	0.00175326		1.65181	0.0023031		1.65538	0.00170585		1.65123	0.00168515		1.65225	0.000829153		1.65024	0.00157285		1.65241	0.00191275		1.65205	0.00110533
1.65908	0.000474093		1.66476	0.00222861		1.65583	0.000422697		1.65833	0.00191664		1.65665	0.00150426		1.65873	0.00245877		1.65744	0.00190043		1.6602	0.000390054		1.65893	0.00153086		1.65962	0.00179066		1.66194	0.00141988		1.65748	0.00140629		1.65912	0.00183316		1.65649	0.00170938		1.65678	0.00140281		1.65986	0.0010401
1.6669	0.00141411		1.66913	0.00219502		1.65958	0.000115958		1.66552	0.00211972		1.6604	0.00199281		1.66685	0.0019352		1.66213	0.00135192		1.66614	0.000138009		1.66393	0.00220549		1.66494	0.00140876		1.66632	0.000814431		1.66186	0.000933594		1.66693	0.0015685		1.6643	0.00232209		1.66053	0.00190284		1.6658	0.000967435
1.6719	0.0016733		1.67539	0.00298157		1.66615	0.000841672		1.67271	0.00127973		1.6654	0.00214412		1.67185	0.000614586		1.669	0.00225601		1.67051	0.00158038		1.67143	0.00180463		1.669	0.00166123		1.67132	0.0014912		1.66717	0.000477068		1.67225	0.00140679		1.67023	0.00269238		1.66741	0.00164574		1.66986	0.00141745
1.67627	0.00110246		1.6832	0.00257041		1.67396	0.000899259		1.67771	0.00243959		1.67322	0.00226731		1.67529	0.00155638		1.67681	0.00154358		1.67614	0.0018629		1.67893	0.000696707		1.67556	0.0023042		1.67882	0.00125821		1.67498	0.00115891		1.67662	0.00104347		1.67429	0.00172692		1.6746	0.00213467		1.67549	0.00101975
1.68315	0.000867128		1.68945	0.00186354		1.67927	0.00172526		1.68208	0.00198316		1.67978	0.00225618		1.68154	0.00140048		1.68244	0.00202295		1.68395	0.0021416		1.68393	0.00183055		1.68368	0.0018512		1.68632	0.00164177		1.68217	0.0012649		1.68318	0.000228153		1.68024	0.00174357		1.67991	0.00186365		1.6833	0.00122024
1.69127	0.00104804		1.69382	0.00273307		1.68365	0.0017758		1.68896	0.00121958		1.68446	0.0023863		1.68904	0.00227953		1.6865	0.00234133		1.69083	0.00199866		1.68862	0.00155565		1.68994	0.00195531		1.69132	0.00137074		1.68654	0.0014323		1.69131	0.00083505		1.68805	0.00193004		1.68428	0.00220974		1.69049	0.00209509
1.69658	0.000793424		1.69914	0.00196628		1.6899	0.000986031		1.69677	0.00122397		1.68946	0.00266478		1.69497	0.00223285		1.69307	0.00231317		1.6952	0.00112603		1.69549	0.00159035		1.69431	0.00206911		1.6957	0.00127293		1.69123	0.00122032		1.69693	0.00128364		1.69492	0.00207124		1.69085	0.0024888		1.69486	0.00130932
1.70065	0.000793915		1.70726	0.00311504		1.69771	0.00100758		1.7024	0.00149138		1.69728	0.00297642		1.69904	0.00128164		1.70088	0.00335532		1.7002	0.00103171		1.70331	0.00178593		1.69993	0.00297182		1.70288	0.00144071		1.69904	0.00106668		1.701	0.00151588		1.69898	0.0019145		1.69866	0.00250249		1.69987	0.00127452
1.70752	0.00105882		1.71414	0.00259587		1.70396	0.000694963		1.70677	0.00183782		1.70478	0.0021586		1.70498	0.00155145		1.70682	0.00239849		1.70802	0.00152056		1.70862	0.00132086		1.70775	0.00264714		1.7107	0.00199929		1.70654	0.000901906		1.70756	0.00159435		1.7043	0.00199553		1.70491	0.00308845		1.70768	0.000585714
1.71565	0.000552537		1.7182	0.00258028		1.70833	0.0020226		1.71271	0.00147601		1.70946	0.00205073		1.7131	0.00193006		1.71119	0.0017695		1.71552	0.00116165		1.71299	0.0018479		1.71462	0.00222672		1.71601	0.00204525		1.71123	0.00128151		1.71568	0.00143197		1.71211	0.00131511		1.70897	0.0013393		1.71486	0.000797805
1.72127	0		1.72351	0.00204333		1.71396	0.00100679		1.72083	0.00161893		1.71415	0.001852		1.71997	0.00218124		1.71744	0.00189895		1.7202	0.000959565		1.71987	0.00197813		1.71869	0.00204006		1.72007	0.000836621		1.71561	0.000900376		1.72131	0.000965455		1.71961	0.00147806		1.71491	0.00257473		1.71955	0.000414115
1.72471	0.000158685		1.73163	0.00185256		1.72177	0.00127279		1.7274	0.00176647		1.72134	0.00251095		1.72404	0.00243393		1.72556	0.00211163		1.72489	0.00119145		1.72799	0.00155745		1.724	0.00150781		1.72726	0.00082462		1.72311	0.00167619		1.72506	0.00118544		1.72367	0.00160127		1.72272	0.00173545		1.72424	0.00102259
1.73065	0.000831012		1.73882	0.00245538		1.72865	0.000985052		1.73115	0.00156361		1.72915	0.00244967		1.72935	0.00213499		1.7315	0.00211478		1.73239	0.00167224		1.733	0.00148467		1.73212	0.00105305		1.73538	0.00122697		1.73123	0.00125878		1.73068	0.00146531		1.72867	0.00234074		1.72929	0.001247		1.73205	0.00107096
1.73815	0.0014249		1.74257	0.00191557		1.73302	0.000504377		1.73709	0.00167316		1.73415	0.00174098		1.73716	0.00293609		1.73525	0.00243926		1.73989	0.00171077		1.73675	0.0014716		1.739	0.00087365		1.74038	0.000638503		1.7356	0.00162439		1.73818	0.00139772		1.73649	0.00217957		1.73335	0.000833612		1.73955	0.00105499
1.74408	0.00143339		1.74695	0.00183412		1.73802	0.000746869		1.74552	0.000684983		1.73821	0.00179974		1.74435	0.00271703		1.74088	0.00255106		1.74427	0.00138166		1.743	0.00166651		1.74275	0.00100638		1.74413	0.00148305		1.73936	0.000868251		1.74474	0.000643637		1.74399	0.00175111		1.73897	0.00150881		1.74361	0.00130057
1.74846	0.00122584		1.75445	0.0019171		1.74615	0.000893383		1.75177	0.000891137		1.7454	0.00178673		1.74873	0.00161313		1.74838	0.00204606		1.74833	0.0017977		1.75081	0.00149616		1.74744	0.00147281		1.75038	0.00117444		1.74623	0.00143295		1.74912	0.00124418		1.74805	0.00198998		1.74741	0.00244536		1.74768	0.000426372
1.75408	0.000818101		1.76164	0.00210304		1.75333	0.00134096		1.75521	0.0015546		1.75353	0.00249626		1.75372	0.00225063		1.75494	0.00144082		1.7552	0.0015004		1.75643	0.00225506		1.75493	0.00177437		1.75788	0.00143731		1.75404	0.00239146		1.75443	0.00217381		1.75211	0.00191784		1.75397	0.00272913		1.75487	0.000696685
1.7619	0.00109837		1.76632	0.00163853		1.75708	0.00115605		1.76052	0.00122463		1.75853	0.00192524		1.76154	0.00210886		1.75932	0.00222827		1.7627	0.000711104		1.76081	0.00125056		1.76181	0.00154721		1.76382	0.00205363		1.75935	0.00185145		1.76193	0.000727777		1.7593	0.00163989		1.75772	0.00231858		1.76205	0.000584839
1.76908	0.00163833		1.77101	0.00181634		1.76177	0.000638747		1.76802	0.00184989		1.76228	0.00261168		1.76904	0.00148935		1.76463	0.00231758		1.76802	0.000507227		1.76675	0.00134001		1.7665	0.00162249		1.76819	0.00149686		1.76373	0.000835033		1.76912	0.00021568		1.7668	0.00199531		1.76241	0.00234951		1.76705	0.000308178
1.77346	0.000937237		1.7782	0.00332293		1.76927	0.00114312		1.77458	0.00124482		1.76853	0.00311492		1.7731	0.000885046		1.77244	0.00173041		1.77239	0.00104448		1.77456	0.00202095		1.77119	0.00178978		1.77413	0.00197483		1.7703	0.00166657		1.77381	0.00080602		1.7718	0.00251301		1.76991	0.00130578		1.77173	0.000684646
1.77815	0.00113433		1.7857	0.00289025		1.77615	0.00108025		1.77896	0.00119038		1.77634	0.00224674		1.77716	0.00105872		1.77963	0.00279778		1.77895	0.00138502		1.78112	0.00165276		1.77837	0.00149724		1.78195	0.00238397		1.77811	0.00111411		1.77881	0.00102329		1.77617	0.00265309		1.7771	0.00137424		1.7783	0.000685303
1.78596	0.00151903		1.79132	0.00175992		1.78083	0.00103187		1.78427	0.00139829		1.78196	0.00209082		1.78435	0.00103966		1.78431	0.00283582		1.78677	0.00132722		1.7855	0.000676428		1.78618	0.000974024		1.78851	0.00114432		1.78436	0.00153676		1.78631	0.000756126		1.78305	0.00182238		1.78147	0.00188513		1.78643	0.000363992
1.79346	0.00165777		1.79539	0.00155972		1.78552	0.000961547		1.79177	0.00132101		1.78634	0.00247779		1.79185	0.0010585		1.789	0.00304892		1.7927	0.00105545		1.79081	9.28343e-05		1.7915	0.00113647		1.79257	0.000463481		1.78842	0.00132696		1.79381	0.00180096		1.79086	0.000780321		1.78647	0.0020197		1.79205	0.000703032
1.79815	0.00196403		1.80195	0.0023342		1.79271	0.00105596		1.79927	0.00100113		1.79228	0.00280454		1.79654	0.00102766		1.79619	0.00266791		1.79677	0.000770027		1.79862	0.0004155		1.79587	0.00168831		1.79788	0.00135037		1.79436	0.000981454		1.7985	0.002062		1.79648	0.00126183		1.79366	0.00198948		1.79611	0.000315182
1.80283	0.00144532		1.81007	0.00204508		1.80021	0.00123675		1.80396	0.000437994		1.80009	0.00237349		1.80091	0.00132554		1.804	0.00161987		1.80302	0.000914085		1.80581	0.00116629		1.80244	0.00148932		1.80601	0.00140697		1.80217	0.00114558		1.80287	0.000904221		1.80086	0.00185035		1.80147	0.00275297		1.80237	0.000756876
1.81033	0.00131671		1.81601	0.00140715		1.80583	0.000494779		1.80865	0.00085579		1.80665	0.00208263		1.80779	0.00132125		1.809	0.00203282		1.81114	0.000921926		1.81018	0.00143623		1.81056	0.0012659		1.81288	0.000941679		1.80904	0.000899939		1.81037	0.000506881		1.8071	0.00254387		1.80647	0.00309199		1.81048	0.00147632
1.81815	0.0012783		1.81976	0.00256272		1.81021	0.000528665		1.81584	0.000661711		1.81103	0.00169062		1.81591	0.0013932		1.81338	0.00233713		1.81739	0.0015871		1.81518	0.00101284		1.81618	0.00153026		1.81726	0.0013884		1.8131	0.00125353		1.81818	0.00151747		1.81523	0.00221109		1.81085	0.0022435		1.81674	0.000987134
1.82252	0.00150906		1.82632	0.00219195		1.81677	0.000963506		1.82365	0.00132232		1.81634	0.00206605		1.82185	0.00230694		1.82088	0.00155808		1.82145	0.00117151		1.823	0.00155385		1.82025	0.00162403		1.82226	0.000655258		1.81873	0.00143164		1.82256	0.00133626		1.82117	0.00196334		1.81772	0.0012215		1.8208	0.000835233
1.82658	0.00133256		1.83476	0.00215836		1.8249	0.00128435		1.82865	0.00112825		1.82415	0.00182555		1.8256	0.00234014		1.82869	0.00150912		1.82708	0.00114485		1.8305	0.00192023		1.82681	0.00181598		1.83038	0.00165739		1.82685	0.00150813		1.82631	0.0019638		1.82523	0.00141457		1.82553	0.000903965		1.82642	0.000780733
1.83346	0.00070681		1.84038	0.00236735		1.83052	0.000803868		1.83302	0.000592774		1.83134	0.00141801		1.83185	0.00167202		1.83338	0.00181678		1.83552	0.000900418		1.83424	0.000593057		1.83494	0.0017451		1.83757	0.001654		1.83373	0.00134925		1.83318	0.00147438		1.83117	0.00218867		1.83085	0.00187592		1.83486	0.000744838
1.84065	0.00126		1.84382	0.00112199		1.83458	0.0017803		1.84021	0.000921434		1.83571	0.00142137		1.84029	0.00140048		1.83713	0.00170982		1.84208	0.000813714		1.83862	0.000436906		1.84056	0.00255535		1.84163	0.00147444		1.83748	0.00197733		1.84068	0.00105504		1.83929	0.00213628		1.83491	0.00169178		1.84112	0.00119135
1.84596	0.000578522		1.84945	0.00149584		1.84115	0.002317		1.84833	0.00156273		1.84071	0.00248703		1.84623	0.0010525		1.844	0.00193132		1.84552	0.000815955		1.84581	1.82512e-05		1.84431	0.00163196		1.84569	0.00172351		1.84216	0.00146508		1.84599	0.000940281		1.84555	0.00180262		1.84178	0.00162803		1.84486	0.00161969
1.85033	0.00100686		1.85726	0.00156784		1.84927	0.00296182		1.85302	0.000914189		1.84853	0.00256174		1.85029	0.000921664		1.8515	0.00200929		1.85051	0.000403497		1.85299	0.000438934		1.84994	0.00189434		1.85288	0.000885301		1.84966	0.00184949		1.85037	0.00104687		1.8493	0.00194692		1.84991	0.00251004		1.84986	0.00158751
1.8569	0.00149402		1.86351	0.00232915		1.8549	0.0011396		1.85677	0.000657979		1.85571	0.00234076		1.85622	0.0020624		1.85681	0.00250504		1.85801	0.000602445		1.858	0.000932397		1.85775	0.0015274		1.86007	0.00124123		1.85686	0.00169498		1.85693	0.00142448		1.85461	0.00261624		1.85553	0.00322727		1.85767	0.00137498
1.86471	0.00136868		1.86788	0.00171931		1.85833	0.000187843		1.86302	0.0004931		1.85978	0.0014837		1.86466	0.000521434		1.86119	0.00343876		1.86489	0.000924614		1.86237	0.00141685		1.864	0.00235703		1.86507	0.00129104		1.86123	0.00163313		1.86475	0.00129703		1.86242	0.00156886		1.85897	0.00252067		1.86424	0.00165361
1.87065	0.000973027		1.8732	0.00264263		1.86427	0.000924331		1.87084	0.000830762		1.86415	0.00211999		1.87091	0.00122596		1.86775	0.00257607		1.86958	0.00134335		1.86925	0.00172757		1.86838	0.00157209		1.86976	0.00102161		1.86591	0.000345946		1.871	0.00117116		1.86899	0.00182304		1.86522	0.00246401		1.86861	0.000940513
1.87471	0.00101078		1.8807	0.000788969		1.87208	0.000658138		1.87646	0.00106194		1.87134	0.00291934		1.87435	0.00235855		1.87556	0.00181069		1.87426	0.00116479		1.87737	0.00107616		1.87369	0.00114263		1.87663	0.000597521		1.87341	0.00153129		1.87506	0.000960239		1.87336	0.00287131		1.87272	0.00230559		1.87361	0.00113181
1.88096	0.00178475		1.88788	0.00105503		1.87802	0.000993279		1.88083	0.00129993		1.87853	0.00298334		1.87966	0.00208766		1.88181	0.00140614		1.88176	0.00161959		1.88299	0.000154799		1.8815	0.000977325		1.88444	0.000941679		1.88123	0.00241725		1.881	0.00123148		1.87836	0.0022899		1.87866	0.00223902		1.88111	0.00134062
1.88908	0.00198528		1.89257	0.00222927		1.8824	0.000840105		1.88677	0.0016815		1.88353	0.00196553		1.88716	0.00191143		1.88588	0.00139227		1.88926	0.00121139		1.88706	0.00112798		1.88869	0.00148404		1.89007	0.00115859		1.88623	0.00177103		1.88881	0.00183679		1.88586	0.00192894		1.88303	0.0016167		1.88861	0.0019688
1.89533	0.00180142		1.89757	0.00198559		1.88802	0.000170215		1.89458	0.000699912		1.8879	0.00184423		1.89372	0.00228853		1.8915	0.00171927		1.89427	0.000724547		1.89362	0.00166426		1.89306	0.00178362		1.89413	0.000821903		1.8906	0.000818643		1.89537	0.00188941		1.89336	0.00219977		1.88866	0.00158082		1.89361	0.000818599
1.8994	0.00106013		1.90476	0.00186727		1.89552	0.000814446		1.90115	0.00109685		1.89478	0.00259825		1.8981	0.00195982		1.89931	0.00193027		1.89864	0.00134357		1.90143	0.00120346		1.89806	0.00173123		1.90069	0.00132365		1.89716	0.00109182		1.89943	0.00196334		1.89836	0.00140746		1.89647	0.00200128		1.89799	0.000761253
1.90533	0.000710568		1.91226	0.001862		1.90271	0.0012485		1.90521	0.000883452		1.9029	0.00261861		1.9031	0.00175831		1.90619	0.0021835		1.90583	0.00245011		1.90737	0.00111784		1.90587	0.00164627		1.90851	0.00126976		1.90529	0.00163663		1.90506	0.00187603		1.90273	0.00159727		1.90335	0.00181124		1.90517	0.00105105
1.91346	0.00167346		1.91726	0.00166224		1.9074	0.000951166		1.91083	0.00167821		1.90884	0.00244317		1.91091	0.000755277		1.91056	0.00171885		1.91395	0.000866588		1.91143	0.00121473		1.91337	0.00198327		1.91476	0.000953226		1.91061	0.00140039		1.91318	0.00119951		1.90992	0.00214827		1.90772	0.00217764		1.91298	0.0017613
1.92002	0.000738841		1.92164	0.00170307		1.91209	0.000662643		1.91865	0.00113988		1.9129	0.00303077		1.91841	0.00048503		1.91588	0.00119704		1.91927	0.000293269		1.91768	0.00197746		1.91806	0.00109421		1.91882	0.00173664		1.91467	0.000909992		1.92006	0.00140248		1.91773	0.00118658		1.91272	0.00222462		1.9183	0.00113597
1.92346	0.00103742		1.92914	0.0012436		1.91958	0.0011919		1.92552	0.000767093		1.91915	0.00301209		1.9231	0		1.924	0.00226757		1.92333	0.000495577		1.92581	0.00171495		1.92244	0.000896322		1.92507	0.00178215		1.92154	0.000941461		1.92381	0.000979063		1.92274	0.00170072		1.92054	0.00221447		1.92236	0.00065466
1.92846	0.0014816		1.93695	0.00158826		1.9274	0.00168099		1.9299	0.00109773		1.92728	0.00280706		1.92779	0.00109855		1.93088	0.00152068		1.9302	0.00047519		1.93205	0.00150878		1.93025	0.00106713		1.93319	0.00151294		1.92967	0.0014465		1.92849	0.000807834		1.92711	0.00173358		1.92772	0.00250154		1.92955	0.000950363
1.93627	0.00134335		1.94163	0.00161723		1.93208	0.00112373		1.93521	0.00142288		1.93322	0.00224569		1.93497	0.00202963		1.93463	0.00252248		1.93833	0.000998324		1.9358	0.000795625		1.93806	0.00168523		1.93944	0.00131686		1.9353	0.00158811		1.93599	0.000990856		1.93429	0.00151691		1.93241	0.00306956		1.93767	0.000766725
1.94283	0.00161005		1.94539	0.00155818		1.93646	0.00110787		1.94302	0.00182991		1.93728	0.00195546		1.94279	0.00213927		1.93932	0.00201811		1.94333	0.00095262		1.94112	0.00117124		1.94243	0.00122628		1.94288	0.00193408		1.93873	0.00139646		1.94287	0.000665182		1.94211	0.00175933		1.9371	0.00248455		1.94268	0.000788394
1.94752	0.00135201		1.95195	0.00181349		1.94427	0.00115135		1.95021	0.00136053		1.94353	0.00178694		1.94779	0.00166516		1.94682	0.0020986		1.94708	0.00188732		1.94862	0.00125146		1.94619	0.00204424		1.94819	0.00154848		1.94467	0.00138903		1.94756	0.000989269		1.94711	0.00253077		1.94491	0.00180746		1.94642	0.00104864
1.95252	0.00100751		1.95945	0.00247184		1.95208	0.00116232		1.95427	0.000510444		1.95196	0.00210509		1.95216	0.00176581		1.95369	0.00180775		1.95333	0.00144977		1.95518	0.00105971		1.95306	0.00232753		1.95601	0.00180479		1.95248	0.00157762		1.95224	0.000732313		1.95086	0.00292548		1.95241	0.00186672		1.95267	0.00159342
1.95971	0.00135462		1.96476	0.00147213		1.95646	0.000940197		1.95865	4.82999e-05		1.9579	0.00219637		1.95935	0.00177288		1.95838	0.00201748		1.96083	0.000515741		1.95955	0.00173411		1.96056	0.00174576		1.96257	0.0015949		1.95842	0.000823232		1.95943	0.00165309		1.95742	0.00138882		1.95647	0.00191606		1.96017	0.00179085
1.96721	0.000321456		1.96913	0.001329		1.96021	0.000559809		1.96615	0.00057038		1.96134	0.00219784		1.96716	0.00112381		1.96307	0.00245439		1.96677	0.00109332		1.96487	0.002025		1.96587	0.00107902		1.96663	0.000761223		1.96279	0.0012649		1.96724	0.00140883		1.96492	0.00158173		1.96054	0.00218071		1.96612	0.00134018
1.97221	0.000253961		1.9757	0.00126204		1.96708	0.00150804		1.97302	0.000921873		1.96696	0.00183521		1.97216	0.00156987		1.97025	0.0025746		1.97114	0.00184184		1.97237	0.00156353		1.97025	0.00134492		1.97194	0.000589597		1.96842	0.000810338		1.97256	0.00126006		1.97055	0.00198821		1.96741	0.00236698		1.97017	0.00130801
1.9769	0.00109233		1.98351	0.000778212		1.97459	0.00123753		1.97802	0.00097654		1.97446	0.00142452		1.9756	0.00174482		1.97807	0.0021545		1.97708	0.00148875		1.97987	0.00109598		1.97681	0.00140656		1.97944	0.000760543		1.97623	0.00107936		1.97693	0.000938694		1.97492	0.00123142		1.97491	0.00156476		1.97611	0.00116333
1.98377	0.0011876		1.98976	0.00125612		1.9799	0.000962918		1.98271	0.000744261		1.98103	0.0018988		1.98216	0.0010585		1.98338	0.00316808		1.98489	0.000954636		1.98456	0.00107638		1.98494	0.00129276		1.98694	0.000706203		1.9831	0.000550279		1.98349	0.00114553		1.98086	0.00157995		1.98022	0.00246637		1.98392	0.000638682
1.99158	0.000992638		1.99382	0.00176278		1.98396	0.000541397		1.98958	0.000676641		1.9854	0.00211117		1.98998	0.0007632		1.98775	0.00219716		1.99145	0.00122124		1.98893	0.00138575		1.99087	0.000655072		1.99163	0.00204706		1.98748	0.00127823		1.99131	0.00174925		1.98898	0.00201196		1.9846	0.00359863		1.9908	0.00186964
1.9969	0.0006653		1.99976	0.000963271		1.99052	0.000737663		1.9974	0.000524715		1.99071	0.00211789		1.99529	0.00164825		1.99432	0.0016722		1.99583	0.00116546		1.99643	0.00202861		1.99494	0.000964779		1.99601	0.00183038		1.99248	0.00169083		1.99693	0.0017023		1.99523	0.00181017		1.99116	0.00399737		1.99486	0.000971375
2.00127	0.00153929		2.00789	0.000561762		1.99865	0.000738055		2.00302	0.00141585		1.99821	0.00225618		1.99966	0.00131825		2.00213	0.0025332		2.00114	0.00114978		2.00424	0.00172352		2.00088	0.00150605		2.00319	0.00100417		2.00029	0.000581092		2.001	0.00151769		1.99961	0.00186123		1.99929	0.0032877		2.00017	0.00164333
2.00815	0.00140005		2.01414	0.00103967		2.0049	0.000923744		2.00709	0.00162662		2.00571	0.00195399		2.0056	0.00101375		2.00807	0.00219821		2.00895	0.00156515		2.00924	0.00166358		2.009	0.00083645		2.01101	0.00144093		2.00748	0.00113028		2.00787	0.00125734		2.00492	0.00190052		2.00491	0.0025117		2.00799	0.00155687
2.01627	0.00139515		2.01851	0.0014763		2.00896	0.00163418		2.01333	0.00142924		2.0104	0.00138695		2.01373	0.000882477		2.01213	0.00115501		2.01614	0.00100191		2.01331	0.00139003		2.01525	0.00154391		2.01632	0.00195174		2.01217	0.00078914		2.016	0		2.01305	0.00133554		2.00928	0.00215403		2.01517	0.000891485
2.02127	0.00142016		2.02413	0.000950978		2.01458	0.000837167		2.02146	0.00155526		2.01509	0.00161968		2.02029	0.00112189		2.01869	0.00222932		2.02083	0.00112558		2.02049	0.00168003		2.01962	0.00170548		2.02038	0.00160237		2.01685	0.000892946		2.02131	0.00151407		2.01992	0.00103096		2.01522	0.00259574		2.01955	0
2.02502	0.00149255		2.03226	0.00143459		2.02271	0.00111453		2.0274	0.00179259		2.02228	0.00228472		2.02435	0.00192128		2.02681	0.00203555		2.02552	0.000823797		2.02862	0.000933975		2.02525	0.00127977		2.02757	0.000784771		2.02467	0.00139274		2.02475	0.00227858		2.0243	0.00149915		2.02335	0.00265193		2.02455	8.73317e-05
2.03127	0.00149304		2.03882	0.00138607		2.02958	0.00159422		2.03146	0.00169358		2.03009	0.00169271		2.02966	0.00228617		2.03244	0.00243443		2.03333	0.0012208		2.03362	0.00153582		2.03338	0.00152806		2.0357	0.000827111		2.03217	0.00129353		2.03068	0.00176218		2.0293	0.00164034		2.0296	0.00247652		2.03236	0.000640871
2.03877	0.000736553		2.04257	0.000909268		2.03365	0.0016902		2.03771	0.00126876		2.03509	0.00197015		2.03779	0.00137307		2.03588	0.00204249		2.04083	0.000309176		2.03706	0.00153244		2.03994	0.00150011		2.04038	0.000768695		2.03655	0.00114623		2.03849	0.00148322		2.03742	0.00221731		2.03366	0.00134426		2.03986	0.000934166
2.04471	0.00097891		2.04726	0.000715429		2.03927	0.000842456		2.04615	0.00162947		2.03946	0.00130217		2.04466	0.00199623		2.0415	0.00207569		2.04489	0.00106173		2.04362	0.00134339		2.04337	0.00131477		2.04413	0.00119097		2.0406	0.000885078		2.04443	0.00163835		2.04461	0.00200974		2.0396	0.00288235		2.04362	0.00101143
2.04877	0.00160384		2.05476	0.00189866		2.0474	0.000147885		2.05208	0.00126744		2.04665	0.00145956		2.04904	0.00188252		2.04931	0.00250777		2.04896	0.00149435		2.05143	0.00172577		2.04838	0.00103698		2.0507	0.000914056		2.04748	0.00135756		2.04881	0.00186605		2.04836	0.00236893		2.04772	0.00326221		2.04799	0.000773291
2.05471	0.00149337		2.06195	0.00121924		2.05396	0.000451295		2.05552	0.00146152		2.05478	0.00188138		2.05404	0.00231208		2.05556	0.0017302		2.05614	0.000918566		2.05705	0.00129044		2.05588	0.00105569		2.05851	0.0011681		2.05467	0.00184796		2.05443	0.00177578		2.05273	0.00204659		2.05429	0.00193376		2.05517	0.00100486
2.06252	0.00105703		2.06632	0.000868217		2.05771	0.00090729		2.06083	0.00136997		2.05946	0.00244757		2.06216	0.002014		2.05994	0.00226147		2.06364	0.00104156		2.06143	0.000786387		2.06306	0.00140568		2.06382	0.000746279		2.05998	0.002023		2.06225	0.00083505		2.06023	0.00103073		2.05772	0.00186081		2.06236	0.0010841
2.06908	0.00122813		2.07132	0.0010041		2.0624	0.00102403		2.06865	0.00067203		2.0629	0.00214853		2.06935	0.00214955		2.06525	0.00267484		2.06864	0.00131108		2.06737	0.00175912		2.06743	0.000683467		2.06819	0.000693976		2.06435	0.00178043		2.06912	0.000790598		2.06742	0.00141568		2.06272	0.00167667		2.06737	0.000947955
2.07346	0.00111766		2.07851	0.00122385		2.0699	0.000878301		2.0749	0.00126041		2.06947	0.00185326		2.0731	0.00179515		2.07338	0.00118548		2.07301	0.00113096		2.07549	0.00222644		2.07244	0.00137574		2.07413	0.000969076		2.07092	0.00177977		2.07349	0.00101989		2.07211	0.002081		2.07053	0.00305469		2.07174	0.00178516
2.07877	0.00139973		2.08601	0.00128641		2.07677	0.000965073		2.07927	0.00133791		2.07728	0.00200016		2.07779	0.0017112		2.08056	0.00239891		2.07989	0.00139846		2.08174	0.00127467		2.07963	0.00150517		2.08226	0.00148169		2.07904	0.00151534		2.0785	0.00155444		2.0768	0.00188587		2.0771	0.00209288		2.07861	0.00108891
2.08658	0.00120983		2.09132	0.00134019		2.08146	0.000763714		2.0849	0.000695302		2.08259	0.00205682		2.08498	0.00206111		2.08494	0.00275975		2.0877	0.00126695		2.08612	0.00182717		2.08744	0.0017035		2.08851	0.00167256		2.08498	0.001318		2.08631	0.00175832		2.08367	0.00158084		2.08147	0.00241892		2.08674	0.000750966
2.09377	0.000925798		2.0957	0.00118082		2.08646	0.00113646		2.0924	0.00109488		2.08697	0.00171622		2.09216	0.00181164		2.08963	0.002438		2.09364	0.0017576		2.09143	0.00190873		2.09244	0.000975124		2.09288	0.00140425		2.08904	0.00076226		2.09381	0.00115823		2.09148	0.00136639		2.08647	0.00274872		2.09236	0.00128415
2.09846	0.000540444		2.10226	0.00104164		2.09365	0.000854013		2.09958	0.000791243		2.09322	0.000924425		2.09685	0.00174932		2.09744	0.0020364		2.0977	0.00187141		2.09924	0.00116876		2.09681	0.000755666		2.0982	0.00122719		2.09529	0.00110733		2.09818	0.000925313		2.09711	0.00177953		2.09397	0.00438738		2.09643	0.00137104
2.10315	0.000503346		2.11038	0.00191118		2.10146	0.00017805		2.10427	0.000915067		2.10134	0.00150174		2.10154	0.00167266		2.10494	0.00218203		2.10396	0.00105433		2.10612	0.00112618		2.10369	0.00144398		2.10632	0.00125436		2.10342	0.0011989		2.10287	0.00152903		2.10117	0.00235539		2.10147	0.00445514		2.10267	0.00072098
2.11096	0.001008		2.1157	0.0026029		2.10646	0.000538459		2.10896	0.00119477		2.10759	0.00118843		2.10841	0.00119298		2.10963	0.00243359		2.11208	0.00131758		2.11049	0.00138282		2.11181	0.00157517		2.1132	0.000963642		2.10967	0.00128915		2.11068	0.00175673		2.10773	0.00171338		2.10647	0.00356274		2.1108	0.0012627
2.11846	0.000928249		2.11976	0.00184049		2.11083	0.000747848		2.11615	0.000708474		2.11196	0.00160395		2.11623	0.0015022		2.11431	0.00161209		2.11833	0.00125619		2.1158	0.00124628		2.11713	0.00117653		2.11726	0.000864697		2.11373	0.00110974		2.11818	0.00174902		2.11555	0.00172647		2.11085	0.00283088		2.11674	0.00116661
2.12252	0.00097695		2.12632	0.00148157		2.11771	0.00104146		2.12365	0.000997397		2.11728	0.00203373		2.12185	0.00152469		2.12181	0.00163983		2.12239	0.00119234		2.12362	0.000699636		2.12118	0.000841292		2.12257	0.0012804		2.11967	0.00228066		2.12225	0.00227155		2.12148	0.00117215		2.11803	0.00278532		2.1208	0.000829324
2.12658	0.00143454		2.13476	0.00118301		2.12583	0.000702406		2.12865	0.000633609		2.12509	0.00248514		2.12591	0.00136601		2.12963	0.00255401		2.12833	0.000492217		2.13081	0.000558357		2.12806	0.00109619		2.13069	0.00088349		2.12779	0.00194958		2.12631	0.00134306		2.12555	0.00123586		2.12585	0.00318926		2.12705	0.00139446
2.13377	0.0013288		2.14007	0.00110706		2.13115	0.000373532		2.13333	0.00134077		2.13197	0.00164676		2.13247	0.00206325		2.134	0.00281922		2.13645	0.000792431		2.13456	0.000778951		2.13618	0.000720007		2.13788	0.0011921		2.13435	0.00178611		2.13318	0.000365363		2.1318	0.00209166		2.13116	0.00348601		2.13518	0.00123972
2.14127	0.00094165		2.14351	0.00165543		2.13521	0.00043582		2.14052	0.00177832		2.13634	0.00186039		2.1406	0.00221808		2.13775	0.00171276		2.14271	0.00111774		2.13924	0.00109508		2.1415	0.00111908		2.14163	0.00173234		2.13811	0.00115738		2.14068	0.000616195		2.14023	0.00277186		2.13522	0.00392182		2.14142	0.00114144
2.14627	0.00081614		2.14976	0.00152547		2.14208	0.00126182		2.14833	0.00133857		2.14165	0.00152		2.14654	0.00140691		2.14463	0.00110583		2.14614	0.00127457		2.14674	0.00231004		2.14493	0.000696895		2.14601	0.00118304		2.14311	0.00139056		2.146	0.000886078		2.14617	0.00197533		2.1421	0.00362554		2.14487	0.00159101
2.15065	0.000749136		2.15726	0.000623448		2.15021	0.00204826		2.15302	0.000735917		2.14947	0.00090239		2.15029	0.00135766		2.15244	0.00154821		2.15145	0.000955756		2.15362	0.00150382		2.15119	0.00127008		2.15351	0.00163407		2.15061	0.000932282		2.15037	0.00182046		2.14961	0.00195113		2.15022	0.00471814		2.15018	0.00152601
2.15752	0.00071923		2.1632	0.000655718		2.15583	0.00109317		2.15677	0.00108829		2.15665	0.00192755		2.15685	0.00181699		2.15775	0.00145931		2.15895	0.00101602		2.15831	0.00201757		2.15869	0.00247215		2.16038	0.00150026		2.15748	0.00124042		2.15693	0.00136325		2.15523	0.00147983		2.15522	0.00403609		2.15799	0.000934603
2.16533	0.00111243		2.16757	0.0014954		2.15927	0.00136857		2.16334	0.000743163		2.16071	0.0022587		2.16529	0.00130755		2.16213	0.0019496		2.16552	0.00139555		2.16299	0.00186818		2.16463	0.00157297		2.16538	0.00200472		2.16216	0.00149043		2.16475	0.00117728		2.16305	0.00118191		2.15866	0.00466809		2.16455	0.00094117
2.17096	0.00108481		2.1732	0.00124426		2.16521	0.0016522		2.17084	0.000208349		2.16509	0.00206962		2.17091	0.000788897		2.16869	0.00234343		2.16989	0.00101759		2.17018	0.00212324		2.169	0.0011959		2.17007	0.00172939		2.16717	0.00200836		2.17068	0.00104619		2.16961	0.00187033		2.16491	0.00442303		2.16862	0.000857121
2.17502	0.000168327		2.18101	0.00118477		2.17271	0.00111864		2.17615	0.000555451		2.17259	0.001388		2.17435	0.00049381		2.17681	0.00246742		2.1752	0.000708416		2.17799	0.00152365		2.17493	0.00151684		2.17695	0.000962736		2.17436	0.0010527		2.17506	0.0014077		2.17367	0.00213095		2.17272	0.00350278		2.17393	0.000499695
2.18127	0.000304459		2.18788	0.00125458		2.17865	0.000548252		2.18052	0.000880379		2.17978	0.00166837		2.17997	0.000329992		2.18275	0.00259751		2.1827	0.001944		2.18331	0.00143668		2.18275	0.000646708		2.18476	0.00151475		2.18217	0.00187156		2.181	0.00107658		2.17898	0.00190629		2.17835	0.00460836		2.18143	0.000975533
2.1894	0.000345642		2.19226	0.000811361		2.18302	0.000936084		2.18709	0.000780266		2.18446	0.0025928		2.18779	0.00124159		2.18681	0.00187248		2.1902	0.00146881		2.18737	0.000528163		2.18931	0.00121043		2.19007	0.00189898		2.18717	0.00179463		2.18881	0.00129839		2.18648	0.00185257		2.18272	0.00497736		2.18892	0.00038785
2.19565	0.000634903		2.19726	0.000735405		2.18865	0.00148414		2.1949	0.000985542		2.18915	0.00179135		2.19404	0.00179343		2.19275	0.00232494		2.19489	0.00155999		2.19424	0.000511489		2.194	0.00197556		2.19444	0.0012967		2.19154	0.000856231		2.19537	0.0017082		2.19398	0.00190341		2.18866	0.00401413		2.19361	0.00107096
2.19971	0.00155139		2.20507	0.000208987		2.19646	0.00161028		2.20115	0.00137304		2.19603	0.00187403		2.19841	0.00117478		2.20088	0.00298839		2.19958	0.0015284		2.20237	0.00138598		2.199	0.00187123		2.20101	0.0014758		2.19842	0.000966156		2.19975	0.00195903		2.19867	0.00172492		2.19647	0.00369967		2.1983	0.00156256
2.20565	0.00162264		2.21226	0		2.20365	0.00141304		2.20552	0.00232763		2.20384	0.00236027		2.20372	0.00144246		2.20744	0.00230939		2.20677	0.00141974		2.20799	0.00134001		2.20681	0.00203081		2.20913	0.0012641		2.20654	0.00155992		2.20537	0.00149819		2.20336	0.00188853		2.20304	0.00404789		2.20549	0.000447384
2.21408	0.00109625		2.21695	0.00104647		2.20802	0.000893775		2.21083	0.00172234		2.20946	0.00151518		2.21122	0.00182555		2.2115	0.00209104		2.21458	0.00146052		2.21206	0.00123929		2.214	0.00122188		2.21507	0.00143256		2.21185	0.00170875		2.21349	0.00137028		2.21055	0.00134952		2.20741	0.0041886		2.2133	0.000494223
2.22033	0.000855035		2.22164	0.00182732		2.21302	0.000839322		2.21865	0.00186263		2.21353	0.00153952		2.21841	0.00189815		2.21713	0.00139774		2.21989	0.00069587		2.21862	0.00141414		2.21869	0.0014508		2.21913	0.000941		2.21592	0.00218975		2.22006	0.00181071		2.21836	0.00161592		2.21272	0.00247392		2.21861	0.00169082
2.22377	0.00144222		2.22914	0.00134107		2.22052	0.000892012		2.22552	0.00087028		2.22009	0.00226689		2.2231	0.00205576		2.22525	0.00255169		2.22395	0.00180084		2.22674	0.0011753		2.22337	0.00172155		2.22538	0.00142644		2.22279	0.00190259		2.2235	0.00133853		2.22336	0.00158728		2.22053	0.00323765		2.22268	0.00159255
2.22908	0.00107566		2.23695	0.000881389		2.22802	0.000951166		2.2299	0.000344248		2.22822	0.00225849		2.22779	0.00242258		2.23181	0.00273327		2.23114	0.00209567		2.23268	0.000875616		2.23118	0.00129187		2.23382	0.00124893		2.23092	0.00111454		2.2285	0.00135894		2.22774	0.00123808		2.22772	0.00329786		2.22986	0.00083392
2.23658	0.00013842		2.24132	0.000584812		2.23271	0.000861456		2.23521	0.000471584		2.23415	0.0019244		2.23529	0.00160178		2.23556	0.00260507		2.23927	0.00143991		2.23612	0.00169513		2.23868	0.00163548		2.23945	0.00105874		2.23623	0.00114754		2.23631	0.00133014		2.23492	0.00223973		2.2321	0.0049299		2.23799	0.00121564
2.24315	0.000776428		2.24507	0.00108225		2.2374	0.000869487		2.24333	0.00171663		2.2379	0.00224149		2.2431	0.00113174		2.24056	0.00222301		2.24395	0.00171637		2.24174	0.00087539		2.24275	0.00161787		2.24288	0.00280738		2.23967	0.000978613		2.24287	0.00146485		2.24305	0.0019427		2.2371	0.00454414		2.24299	0.00130604
2.24752	0.000818918					2.2449	0.0017805					2.24446	0.00149314		2.24779	0.00144631		2.24807	0.00202568		2.2477	0.000855162		2.24955	0.000921357		2.24681	0.00200264		2.24851	0.00191619		2.24592	0.00121485		2.24725	0.00148685		2.24773	0.00162657		2.24491	0.00457979		2.24643	0.0011143
