# Supplementary material for: Binding and sequestration of poison frog alkaloids by a plasma globulin
Source: eLife journal article supplement (doi:10.7554/elife.85096), 2023-12-14
Supplement: fig5-data1 [file BSA+PTX_R1 analysis_DoseResponseRawDataGrouped.xlsx]

## Sheet: RawData
NanoTemper Technologies	NanoTemper Technologies
MO.Affinity Analysis v3.0.5	MO.Affinity Analysis v3.0.5
Origin of exported data	Origin of exported data
Project Title:	20230407_BSA+PTX
Comment:
Project File Path:	C:\Users\nanotemper\Desktop\Aurora_MST\20230407_BSA\BSA+PTX analysis.nta3
Analysis-Set Name:	Analysis-Set #1
Exported from:	Dose-Response (Grouped)
Exported on:	2023-04-07 09:22:39
Analysis Settings	Analysis Settings
Type of Analysis:	MST
Evaluation strategy:	On Time
Cold Region Start:	-1
Cold Region End:	0
Hot Region Start:	4
Hot Region End:	5
Sample Information	Sample Information
Merge-Set Name:	BSA+PTX_R1 (#16)
Date of Measurement:	2023-04-07 08:35:51.306 → 2023-04-07 08:42:31.468
Capillary Type:	Monolith Premium Capillary
Target:	BSA
TargetConcentration:	5e-09
Ligand:	PTX
Measurement Settings	Measurement Settings
MST-Power:	Medium
Excitation-Power:	30
Excitation type:	Pico - RED
Thermostat Setpoint:	25
Fit Results (Kd)	Fit Results (Kd)
Fit Model:	Kd
Bound	863.015
Unbound	896.269
Kd	0.0054955
TargetConc	5e-09
Standard Deviation:	0.435234
Lower Kd Confidence:	0.00369761
Upper Kd Confidence:	0.00816759
Dose Response Curve	Dose Response Curve	Dose Response Curve
Ligand Concentration [M]	Fnorm [‰]	Error Value
0.005	880.482	0
0.0025	885.705	0
0.00125	890.26	0
0.000625	892.699	0
0.0003125	894.593	0
0.00015625	895.281	0
7.8125e-05	896.418	0
3.90625e-05	896.284	0
1.95313e-05	896.493	0
9.76563e-06	896.604	0
4.88281e-06	895.475	0
2.44141e-06	895.357	0
1.2207e-06	896.203	0
6.10352e-07	895.986	0
3.05176e-07	896.339	0
1.52588e-07	896.68	0

## Sheet: Fit-Values
Dose	FNorm
0.00466516
0.00435275
0.00406126
0.00378929
0.00353553
0.00329877
0.00307786
0.00287175
0.00267943
0.0025
0.00233258
0.00217638
0.00203063
0.00189465
0.00176777
0.00164938
0.00153893
0.00143587
0.00133972
0.00125
0.00116629
0.00108819
0.00101532
0.000947323
0.000883883
0.000824692
0.000769465
0.000717936
0.000669858
0.000625
0.000583146
0.000544094
0.000507658
0.000473661
0.000441942
0.000412346
0.000384733
0.000358968
0.000334929
0.0003125
0.000291573
0.000272047
0.000253829
0.000236831
0.000220971
0.000206173
0.000192366
0.000179484
0.000167465
0.00015625
0.000145786
0.000136024
0.000126914
0.000118415
0.000110485
0.000103087
9.61832e-05
8.97421e-05
8.37323e-05
7.8125e-05
7.28932e-05
6.80118e-05
6.34572e-05
5.92077e-05
5.52427e-05
5.15433e-05
4.80916e-05
4.4871e-05
4.18662e-05
3.90625e-05
3.64466e-05
3.40059e-05
3.17286e-05
2.96038e-05
2.76214e-05
2.57716e-05
2.40458e-05
2.24355e-05
2.09331e-05
1.95313e-05
1.82233e-05
1.70029e-05
1.58643e-05
1.48019e-05
1.38107e-05
1.28858e-05
1.20229e-05
1.12178e-05
1.04665e-05
9.76563e-06
9.11165e-06
8.50147e-06
7.93215e-06
7.40096e-06
6.90534e-06
6.44291e-06
6.01145e-06
5.60888e-06
5.23327e-06
4.88281e-06
4.55583e-06
4.25074e-06
3.96608e-06
3.70048e-06
3.45267e-06
3.22145e-06
3.00572e-06
2.80444e-06
2.61663e-06
2.44141e-06
2.27791e-06
2.12537e-06
1.98304e-06
1.85024e-06
1.72633e-06
1.61073e-06
1.50286e-06
1.40222e-06
1.30832e-06
1.2207e-06
1.13896e-06
1.06268e-06
9.91519e-07
9.2512e-07
8.63167e-07
8.05364e-07
7.51431e-07
7.0111e-07
6.54159e-07
6.10352e-07
5.69478e-07
5.31342e-07
4.9576e-07
4.6256e-07
4.31584e-07
4.02682e-07
3.75715e-07
3.50555e-07
3.27079e-07
3.05176e-07
2.84739e-07
2.65671e-07
2.4788e-07
2.3128e-07
2.15792e-07
2.01341e-07
1.87858e-07
1.75277e-07
1.6354e-07
1.52588e-07
