# Supplementary material for: Binding and sequestration of poison frog alkaloids by a plasma globulin
Source: eLife journal article supplement (doi:10.7554/elife.85096), 2023-12-14
Supplement: fig5-data1 [file BSA+PTX_R1 analysis_InitialFluorescenceRawData.xlsx]

## Sheet: RawData
NanoTemper Technologies	NanoTemper Technologies
MO.Affinity Analysis v3.0.5	MO.Affinity Analysis v3.0.5
Origin of exported data	Origin of exported data
Project Title:	20230407_BSA+PTX
Comment:
Project File Path:	C:\Users\nanotemper\Desktop\Aurora_MST\20230407_BSA\BSA+PTX analysis.nta3
Analysis-Set Name:	Analysis-Set #1
Exported from:	Initial Fluorescence (Raw Data Inspection)
Exported on:	2023-04-07 09:23:28
Sample Information	Sample Information
Merge-Set Name:	BSA+PTX_R1 (#16)
Run Name:	BSA+PTX_R1 (#16)
Date of Measurement:	2023-04-07 08:35:51
Capillary Type:	Monolith Premium Capillary
Capillary Position:	1
Ligand:	PTX
Ligand Concentration:	0.005
Target:	BSA
TargetConcentration:	5e-09
Measurement Settings	Measurement Settings
MST-Power:	Medium
Excitation-Power:	30
Excitation type:	Pico - RED
Thermostat Setpoint:	25
Initial Fluorescence of Cap. Index	Initial Fluorescence of Cap. Index	Initial Fluorescence of Cap. Index
Ligand Concentration	Capillary Index	Initial Fluorescence
1.52588e-07	16	13539.8
3.05176e-07	15	13431.3
6.10352e-07	14	13534.2
1.2207e-06	13	13609.1
2.44141e-06	12	13451
4.88281e-06	11	13654.2
9.76563e-06	10	13492.9
1.95313e-05	9	13587.6
3.90625e-05	8	12716.3
7.8125e-05	7	13186.1
0.00015625	6	13268.9
0.0003125	5	13310.3
0.000625	4	14140.5
0.00125	3	14191.2
0.0025	2	15311
0.005	1	18247.7
