# Supplementary material for: Binding and sequestration of poison frog alkaloids by a plasma globulin
Source: eLife journal article supplement (doi:10.7554/elife.85096), 2023-12-14
Supplement: fig5-data1 [file BSA+PTX_R1 analysis_MSTTraceRawData.xlsx]

## Sheet: RawData
NanoTemper Technologies	NanoTemper Technologies
MO.Affinity Analysis v3.0.5	MO.Affinity Analysis v3.0.5
Origin of exported data	Origin of exported data
Project Title:	20230407_BSA+PTX
Comment:
Project File Path:	C:\Users\nanotemper\Desktop\Aurora_MST\20230407_BSA\BSA+PTX analysis.nta3
Analysis-Set Name:	Analysis-Set #1
Exported from:	MST Traces
Exported on:	2023-04-07 09:22:28
Analysis Settings	Analysis Settings
Type of Analysis:	MST
Evaluation strategy:	On Time
Cold Region Start:	-1
Cold Region End:	0
Hot Region Start:	4
Hot Region End:	5
Sample Information	Sample Information		Sample Information	Sample Information		Sample Information	Sample Information		Sample Information	Sample Information		Sample Information	Sample Information		Sample Information	Sample Information		Sample Information	Sample Information		Sample Information	Sample Information		Sample Information	Sample Information		Sample Information	Sample Information		Sample Information	Sample Information		Sample Information	Sample Information		Sample Information	Sample Information		Sample Information	Sample Information		Sample Information	Sample Information		Sample Information	Sample Information
Merge-Set Name:	BSA+PTX_R1 (#16)		Merge-Set Name:	BSA+PTX_R1 (#16)		Merge-Set Name:	BSA+PTX_R1 (#16)		Merge-Set Name:	BSA+PTX_R1 (#16)		Merge-Set Name:	BSA+PTX_R1 (#16)		Merge-Set Name:	BSA+PTX_R1 (#16)		Merge-Set Name:	BSA+PTX_R1 (#16)		Merge-Set Name:	BSA+PTX_R1 (#16)		Merge-Set Name:	BSA+PTX_R1 (#16)		Merge-Set Name:	BSA+PTX_R1 (#16)		Merge-Set Name:	BSA+PTX_R1 (#16)		Merge-Set Name:	BSA+PTX_R1 (#16)		Merge-Set Name:	BSA+PTX_R1 (#16)		Merge-Set Name:	BSA+PTX_R1 (#16)		Merge-Set Name:	BSA+PTX_R1 (#16)		Merge-Set Name:	BSA+PTX_R1 (#16)
Run Name:	BSA+PTX_R1 (#16)		Run Name:	BSA+PTX_R1 (#16)		Run Name:	BSA+PTX_R1 (#16)		Run Name:	BSA+PTX_R1 (#16)		Run Name:	BSA+PTX_R1 (#16)		Run Name:	BSA+PTX_R1 (#16)		Run Name:	BSA+PTX_R1 (#16)		Run Name:	BSA+PTX_R1 (#16)		Run Name:	BSA+PTX_R1 (#16)		Run Name:	BSA+PTX_R1 (#16)		Run Name:	BSA+PTX_R1 (#16)		Run Name:	BSA+PTX_R1 (#16)		Run Name:	BSA+PTX_R1 (#16)		Run Name:	BSA+PTX_R1 (#16)		Run Name:	BSA+PTX_R1 (#16)		Run Name:	BSA+PTX_R1 (#16)
Date of Measurement:	2023-04-07 08:42:31		Date of Measurement:	2023-04-07 08:42:05		Date of Measurement:	2023-04-07 08:41:38		Date of Measurement:	2023-04-07 08:41:11		Date of Measurement:	2023-04-07 08:40:44		Date of Measurement:	2023-04-07 08:40:18		Date of Measurement:	2023-04-07 08:39:51		Date of Measurement:	2023-04-07 08:39:24		Date of Measurement:	2023-04-07 08:38:57		Date of Measurement:	2023-04-07 08:38:31		Date of Measurement:	2023-04-07 08:38:04		Date of Measurement:	2023-04-07 08:37:38		Date of Measurement:	2023-04-07 08:37:11		Date of Measurement:	2023-04-07 08:36:44		Date of Measurement:	2023-04-07 08:36:17		Date of Measurement:	2023-04-07 08:35:51
Capillary Type:	Monolith Premium Capillary		Capillary Type:	Monolith Premium Capillary		Capillary Type:	Monolith Premium Capillary		Capillary Type:	Monolith Premium Capillary		Capillary Type:	Monolith Premium Capillary		Capillary Type:	Monolith Premium Capillary		Capillary Type:	Monolith Premium Capillary		Capillary Type:	Monolith Premium Capillary		Capillary Type:	Monolith Premium Capillary		Capillary Type:	Monolith Premium Capillary		Capillary Type:	Monolith Premium Capillary		Capillary Type:	Monolith Premium Capillary		Capillary Type:	Monolith Premium Capillary		Capillary Type:	Monolith Premium Capillary		Capillary Type:	Monolith Premium Capillary		Capillary Type:	Monolith Premium Capillary
Capillary Position:	16		Capillary Position:	8		Capillary Position:	15		Capillary Position:	7		Capillary Position:	14		Capillary Position:	6		Capillary Position:	13		Capillary Position:	5		Capillary Position:	12		Capillary Position:	4		Capillary Position:	11		Capillary Position:	3		Capillary Position:	10		Capillary Position:	2		Capillary Position:	9		Capillary Position:	1
Ligand:	PTX		Ligand:	PTX		Ligand:	PTX		Ligand:	PTX		Ligand:	PTX		Ligand:	PTX		Ligand:	PTX		Ligand:	PTX		Ligand:	PTX		Ligand:	PTX		Ligand:	PTX		Ligand:	PTX		Ligand:	PTX		Ligand:	PTX		Ligand:	PTX		Ligand:	PTX
Ligand Concentration:	1.52588e-07		Ligand Concentration:	3.90625e-05		Ligand Concentration:	3.05176e-07		Ligand Concentration:	7.8125e-05		Ligand Concentration:	6.10352e-07		Ligand Concentration:	0.00015625		Ligand Concentration:	1.2207e-06		Ligand Concentration:	0.0003125		Ligand Concentration:	2.44141e-06		Ligand Concentration:	0.000625		Ligand Concentration:	4.88281e-06		Ligand Concentration:	0.00125		Ligand Concentration:	9.76563e-06		Ligand Concentration:	0.0025		Ligand Concentration:	1.95313e-05		Ligand Concentration:	0.005
Target:	BSA		Target:	BSA		Target:	BSA		Target:	BSA		Target:	BSA		Target:	BSA		Target:	BSA		Target:	BSA		Target:	BSA		Target:	BSA		Target:	BSA		Target:	BSA		Target:	BSA		Target:	BSA		Target:	BSA		Target:	BSA
TargetConcentration:	5e-09		TargetConcentration:	5e-09		TargetConcentration:	5e-09		TargetConcentration:	5e-09		TargetConcentration:	5e-09		TargetConcentration:	5e-09		TargetConcentration:	5e-09		TargetConcentration:	5e-09		TargetConcentration:	5e-09		TargetConcentration:	5e-09		TargetConcentration:	5e-09		TargetConcentration:	5e-09		TargetConcentration:	5e-09		TargetConcentration:	5e-09		TargetConcentration:	5e-09		TargetConcentration:	5e-09
Measurement Settings	Measurement Settings		Measurement Settings	Measurement Settings		Measurement Settings	Measurement Settings		Measurement Settings	Measurement Settings		Measurement Settings	Measurement Settings		Measurement Settings	Measurement Settings		Measurement Settings	Measurement Settings		Measurement Settings	Measurement Settings		Measurement Settings	Measurement Settings		Measurement Settings	Measurement Settings		Measurement Settings	Measurement Settings		Measurement Settings	Measurement Settings		Measurement Settings	Measurement Settings		Measurement Settings	Measurement Settings		Measurement Settings	Measurement Settings		Measurement Settings	Measurement Settings
MST-Power:	Medium		MST-Power:	Medium		MST-Power:	Medium		MST-Power:	Medium		MST-Power:	Medium		MST-Power:	Medium		MST-Power:	Medium		MST-Power:	Medium		MST-Power:	Medium		MST-Power:	Medium		MST-Power:	Medium		MST-Power:	Medium		MST-Power:	Medium		MST-Power:	Medium		MST-Power:	Medium		MST-Power:	Medium
Excitation-Power:	30		Excitation-Power:	30		Excitation-Power:	30		Excitation-Power:	30		Excitation-Power:	30		Excitation-Power:	30		Excitation-Power:	30		Excitation-Power:	30		Excitation-Power:	30		Excitation-Power:	30		Excitation-Power:	30		Excitation-Power:	30		Excitation-Power:	30		Excitation-Power:	30		Excitation-Power:	30		Excitation-Power:	30
Excitation type:	Pico - RED		Excitation type:	Pico - RED		Excitation type:	Pico - RED		Excitation type:	Pico - RED		Excitation type:	Pico - RED		Excitation type:	Pico - RED		Excitation type:	Pico - RED		Excitation type:	Pico - RED		Excitation type:	Pico - RED		Excitation type:	Pico - RED		Excitation type:	Pico - RED		Excitation type:	Pico - RED		Excitation type:	Pico - RED		Excitation type:	Pico - RED		Excitation type:	Pico - RED		Excitation type:	Pico - RED
Thermostat Setpoint:	25		Thermostat Setpoint:	25		Thermostat Setpoint:	25		Thermostat Setpoint:	25		Thermostat Setpoint:	25		Thermostat Setpoint:	25		Thermostat Setpoint:	25		Thermostat Setpoint:	25		Thermostat Setpoint:	25		Thermostat Setpoint:	25		Thermostat Setpoint:	25		Thermostat Setpoint:	25		Thermostat Setpoint:	25		Thermostat Setpoint:	25		Thermostat Setpoint:	25		Thermostat Setpoint:	25
Included	Included		Included	Included		Included	Included		Included	Included		Included	Included		Included	Included		Included	Included		Included	Included		Included	Included		Included	Included		Included	Included		Included	Included		Included	Included		Included	Included		Included	Included		Included	Included
Time [s]	Normalized Fluorescence [-]		Time [s]	Normalized Fluorescence [-]		Time [s]	Normalized Fluorescence [-]		Time [s]	Normalized Fluorescence [-]		Time [s]	Normalized Fluorescence [-]		Time [s]	Normalized Fluorescence [-]		Time [s]	Normalized Fluorescence [-]		Time [s]	Normalized Fluorescence [-]		Time [s]	Normalized Fluorescence [-]		Time [s]	Normalized Fluorescence [-]		Time [s]	Normalized Fluorescence [-]		Time [s]	Normalized Fluorescence [-]		Time [s]	Normalized Fluorescence [-]		Time [s]	Normalized Fluorescence [-]		Time [s]	Normalized Fluorescence [-]		Time [s]	Normalized Fluorescence [-]
-2.9502	0.997801		-2.9501	0.999951		-2.9501	1.00012		-2.9502	0.998839		-2.9502	0.998166		-2.9502	0.999768		-2.9502	1.00292		-2.9502	1.00099		-2.9502	1.00209		-2.9502	0.999986		-2.9502	1.0007		-2.9501	1.0002		-2.9501	1.00082		-2.9502	0.999368		-2.9502	0.999299		-2.9502	1.00064
-2.9002	1.00025		-2.9001	1.00229		-2.9001	1.0009		-2.9002	0.997749		-2.9002	1.00221		-2.9002	0.997043		-2.9002	1.00323		-2.9002	0.998533		-2.9002	0.999438		-2.9002	1.0022		-2.9002	0.996668		-2.9001	1.00175		-2.9001	0.998528		-2.9002	0.999308		-2.9002	1.00014		-2.9002	0.999473
-2.8502	1.0004		-2.8501	1.00244		-2.8501	0.998571		-2.8502	0.999611		-2.8502	0.998974		-2.8502	1.00076		-2.8501	0.996898		-2.8502	0.999838		-2.8502	1.00178		-2.8502	1.0018		-2.8502	0.998299		-2.8501	1.00236		-2.8501	1.00074		-2.8502	1.00065		-2.8502	1.00033		-2.8502	1.00058
-2.8002	1.0005		-2.8001	0.998482		-2.8001	1.00069		-2.8002	0.998963		-2.8002	0.998092		-2.8002	0.998628		-2.8001	0.999363		-2.8002	1.00025		-2.8002	0.998604		-2.8002	0.998158		-2.8002	1.00031		-2.8001	0.999879		-2.8001	1.00151		-2.8002	1.0025		-2.8002	0.998927		-2.8002	1.00048
-2.7502	1.00177		-2.7501	0.998508		-2.7501	0.999293		-2.7502	1.0009		-2.7502	1.00189		-2.7501	0.999659		-2.7501	0.997615		-2.7502	0.998546		-2.7502	0.998855		-2.7502	0.998781		-2.7502	0.998413		-2.7501	1.00086		-2.7501	1.00136		-2.7502	0.998325		-2.7502	0.997067		-2.7502	0.999514
-2.7002	1.00215		-2.7001	0.999397		-2.7001	0.997339		-2.7002	1.0021		-2.7002	1.00178		-2.7001	1.00248		-2.7001	1.00127		-2.7002	0.997499		-2.7002	0.998667		-2.7002	1.00026		-2.7002	1.00111		-2.7001	0.998343		-2.7001	1.00034		-2.7002	0.999296		-2.7002	1.00072		-2.7002	1.00192
-2.6502	0.999675		-2.6501	0.998276		-2.6501	0.999899		-2.6502	1.00291		-2.6502	0.997644		-2.6501	0.997972		-2.6501	0.999417		-2.6502	0.999973		-2.6502	0.999427		-2.6502	0.998871		-2.6502	1.00117		-2.6501	0.996881		-2.6501	1.00103		-2.6502	0.998837		-2.6502	1.00035		-2.6502	1.00046
-2.6002	1.00112		-2.6001	0.997595		-2.6001	0.998118		-2.6002	0.998695		-2.6002	0.999964		-2.6001	1.00004		-2.6001	1.00025		-2.6002	1.00016		-2.6002	0.998363		-2.6002	0.999093		-2.6002	1.0006		-2.6001	0.998711		-2.6001	0.996975		-2.6002	1.00117		-2.6002	1.00106		-2.6002	0.999967
-2.5501	1.00167		-2.5501	0.99815		-2.5501	1.00061		-2.5502	0.998221		-2.5502	0.996166		-2.5501	0.997863		-2.5501	1.00138		-2.5502	1.001		-2.5502	1.00132		-2.5502	0.999911		-2.5502	0.99715		-2.5501	0.999283		-2.5501	0.996679		-2.5502	0.998875		-2.5502	1.0004		-2.5502	0.996727
-2.5001	0.998236		-2.5001	0.999807		-2.5001	0.999613		-2.5002	0.997591		-2.5002	0.998508		-2.5001	0.998951		-2.5001	1.0003		-2.5002	0.997129		-2.5002	1.00295		-2.5002	1.00005		-2.5002	1.00174		-2.5001	0.998484		-2.5001	1.00118		-2.5002	1.00107		-2.5002	1.00031		-2.5002	0.997679
-2.4501	0.999553		-2.4501	0.998488		-2.4501	1.00068		-2.4502	0.998613		-2.4502	0.998976		-2.4501	1.00193		-2.4501	0.998853		-2.4502	0.997382		-2.4502	1.00061		-2.4501	0.998543		-2.4502	0.998592		-2.4501	0.997554		-2.4501	0.997735		-2.4502	1.00016		-2.4502	1.00012		-2.4501	0.998588
-2.4001	1.00089		-2.4001	1.00025		-2.4001	1.00233		-2.4002	0.9983		-2.4002	0.997329		-2.4001	1.00069		-2.4001	0.999537		-2.4002	1.00053		-2.4002	0.999015		-2.4001	0.997108		-2.4002	0.999545		-2.4001	1.00063		-2.4001	0.998658		-2.4002	0.997859		-2.4002	1.0018		-2.4001	0.996972
-2.3501	0.998563		-2.3501	1.00218		-2.3501	1.00185		-2.3502	0.999841		-2.3502	1.00025		-2.3501	0.999579		-2.3501	1.00044		-2.3502	0.999802		-2.3502	1.00065		-2.3501	0.998895		-2.3502	1.00158		-2.3501	1.00014		-2.3501	0.999443		-2.3502	0.997638		-2.3502	1.00119		-2.3501	0.997648
-2.3001	0.995625		-2.3001	0.99756		-2.3001	0.999864		-2.3002	1.00197		-2.3002	0.999117		-2.3001	0.998984		-2.3001	0.9991		-2.3002	1.00032		-2.3002	0.998687		-2.3001	1.00225		-2.3001	0.995605		-2.3001	0.998959		-2.3001	0.999159		-2.3002	0.999075		-2.3002	1.00018		-2.3001	0.999727
-2.2501	0.997248		-2.2501	1.00018		-2.2501	1.00009		-2.2502	0.99802		-2.2502	1.00012		-2.2501	0.999073		-2.2501	0.999006		-2.2502	0.998542		-2.2502	1.00127		-2.2501	1.0019		-2.2501	0.999666		-2.2501	0.999981		-2.2501	1.00072		-2.2502	0.997849		-2.2502	1.00403		-2.2501	0.998858
-2.2001	0.998096		-2.2001	0.998188		-2.2001	0.995497		-2.2002	0.997739		-2.2002	0.999638		-2.2001	0.99987		-2.2001	0.998667		-2.2002	0.996193		-2.2002	0.997603		-2.2001	1.00016		-2.2001	0.999156		-2.2001	0.998868		-2.2001	0.99617		-2.2002	0.996858		-2.2002	0.997052		-2.2001	0.996585
-2.1501	0.998844		-2.1501	1.00048		-2.1501	0.998175		-2.1502	1.00125		-2.1502	1.00145		-2.1501	0.999368		-2.1501	0.99788		-2.1502	0.99758		-2.1502	1.00029		-2.1501	0.998392		-2.1501	1.00103		-2.1501	0.99852		-2.1501	0.99864		-2.1502	0.998515		-2.1502	0.999485		-2.1501	1.00001
-2.1001	0.998251		-2.1001	1.00035		-2.1001	0.999176		-2.1002	1.00018		-2.1002	0.995954		-2.1001	0.997397		-2.1001	0.999506		-2.1002	1.00078		-2.1002	0.997293		-2.1001	0.996535		-2.1001	0.999138		-2.1001	0.998761		-2.1001	1.00093		-2.1002	0.999144		-2.1002	0.998699		-2.1001	0.996464
-2.0501	0.999343		-2.0501	1.00152		-2.0501	0.997223		-2.0502	0.997617		-2.0501	0.999325		-2.0501	0.99857		-2.0501	0.997994		-2.0502	0.999192		-2.0502	0.997537		-2.0501	0.995824		-2.0501	0.99896		-2.0501	0.998505		-2.0501	0.996607		-2.0502	0.998827		-2.0502	0.997896		-2.0501	0.997631
-2.0001	0.999672		-2.0001	0.999002		-2.0001	1.00044		-2.0001	0.998193		-2.0001	1.00169		-2.0001	0.996908		-2.0001	0.99622		-2.0002	1.00057		-2.0002	0.997936		-2.0001	0.996006		-2.0001	0.997545		-2.0001	0.997748		-2.0001	0.999464		-2.0002	0.999511		-2.0002	0.995599		-2.0001	0.996976
-1.9501	0.997727		-1.9501	0.999881		-1.9501	0.997154		-1.9501	0.99929		-1.9501	0.998335		-1.9501	0.999442		-1.9501	1.0002		-1.9502	0.99909		-1.9502	0.999738		-1.9501	0.998507		-1.9501	0.998814		-1.9501	0.999046		-1.9501	0.996056		-1.9502	0.997361		-1.9502	0.999233		-1.9501	0.996344
-1.9001	0.999184		-1.9001	0.998107		-1.9001	0.999714		-1.9001	0.998742		-1.9001	1.00245		-1.9001	0.995542		-1.9001	0.998627		-1.9002	0.999446		-1.9002	0.999579		-1.9001	1.00152		-1.9001	0.99992		-1.9001	0.999025		-1.9001	0.997864		-1.9002	1.00018		-1.9002	0.99712		-1.9001	0.999563
-1.8501	0.997794		-1.8501	0.99657		-1.8501	0.999559		-1.8501	1.00047		-1.8501	0.996734		-1.8501	0.9995		-1.8501	0.998083		-1.8502	0.998429		-1.8502	1.0009		-1.8501	0.998073		-1.8501	0.999527		-1.8501	0.999149		-1.8501	0.99756		-1.8502	0.998654		-1.8502	0.999036		-1.8501	0.996308
-1.8001	1.00131		-1.8001	0.999652		-1.8001	1.00055		-1.8001	0.997446		-1.8001	0.998004		-1.8001	0.996717		-1.8001	0.997391		-1.8002	1.00031		-1.8001	0.998721		-1.8001	0.997843		-1.8001	0.99754		-1.8001	1.00145		-1.8001	1.00065		-1.8002	0.997103		-1.8001	0.998374		-1.8001	0.99915
-1.7501	0.998092		-1.7501	1.00125		-1.7501	0.999568		-1.7501	1.00016		-1.7501	0.99958		-1.7501	0.999482		-1.7501	0.996536		-1.7501	1.00295		-1.7501	0.998136		-1.7501	1.0001		-1.7501	0.999745		-1.7501	0.996679		-1.7501	1.00295		-1.7501	0.998583		-1.7501	0.998185		-1.7501	0.996321
-1.7001	1.001		-1.7001	1.00112		-1.7001	1.00015		-1.7001	0.999471		-1.7001	0.999941		-1.7001	0.999291		-1.7001	1.00078		-1.7001	1		-1.7001	0.998232		-1.7001	0.995788		-1.7001	1.00064		-1.7001	0.998764		-1.7001	0.997466		-1.7001	0.999896		-1.7001	1.00035		-1.7001	0.997179
-1.6501	0.996278		-1.6501	0.999189		-1.6501	0.999482		-1.6501	0.998446		-1.6501	1.00266		-1.6501	0.998947		-1.6501	0.999865		-1.6501	1.00226		-1.6501	0.998615		-1.6501	1.00167		-1.6501	0.998091		-1.6501	0.996567		-1.6501	0.999412		-1.6501	0.995365		-1.6501	0.999095		-1.6501	0.999215
-1.6001	1.0004		-1.6001	0.997456		-1.6001	1.00104		-1.6001	1.00089		-1.6001	0.996606		-1.6001	0.999015		-1.6001	0.997015		-1.6001	0.997613		-1.6001	0.997745		-1.6001	0.997192		-1.6001	1.00054		-1.6001	0.998299		-1.6001	1.00028		-1.6001	0.998055		-1.6001	0.996589		-1.6001	0.9974
-1.5501	0.999474		-1.5501	0.998264		-1.5501	0.999597		-1.5501	0.999044		-1.5501	0.998279		-1.5501	0.99837		-1.5501	0.999813		-1.5501	1.00039		-1.5501	0.998094		-1.5501	0.999094		-1.5501	0.999935		-1.5501	0.997611		-1.5501	0.999119		-1.5501	0.997572		-1.5501	0.995147		-1.5501	0.998106
-1.5001	1.0012		-1.5001	0.995355		-1.5001	0.99805		-1.5001	1.00171		-1.5001	0.998443		-1.5001	0.999134		-1.5001	0.998633		-1.5001	0.995913		-1.5001	0.997171		-1.5001	0.997813		-1.5001	0.996241		-1.5001	0.997892		-1.5001	0.998124		-1.5001	0.998173		-1.5001	0.999495		-1.5001	0.99763
-1.4501	0.999111		-1.4501	1.00072		-1.45	0.998515		-1.4501	0.999001		-1.4501	0.99929		-1.4501	0.998944		-1.4501	0.999877		-1.4501	0.997123		-1.4501	0.997506		-1.4501	0.998683		-1.4501	0.998232		-1.4501	0.997939		-1.4501	1.0014		-1.4501	0.997522		-1.4501	0.996401		-1.4501	0.996041
-1.4001	1.00067		-1.4	0.999492		-1.4	0.996686		-1.4001	0.997737		-1.4001	0.999914		-1.4001	0.998641		-1.4001	0.998444		-1.4001	0.996427		-1.4001	1.00096		-1.4001	0.995871		-1.4001	0.997387		-1.4001	0.996813		-1.4001	0.996435		-1.4001	0.997946		-1.4001	0.996855		-1.4001	0.995464
-1.3501	1.00095		-1.35	1.00028		-1.35	0.99626		-1.3501	0.998631		-1.3501	1.00058		-1.3501	0.997686		-1.3501	0.996554		-1.3501	1.00141		-1.3501	0.99816		-1.3501	0.997962		-1.3501	0.999072		-1.3501	0.997696		-1.3501	0.995941		-1.3501	0.997751		-1.3501	1.00037		-1.3501	0.995541
-1.3001	0.999471		-1.3	0.997492		-1.3	0.999887		-1.3001	0.998123		-1.3001	0.99873		-1.3001	0.995897		-1.3001	0.99692		-1.3001	0.999026		-1.3001	1.0007		-1.3001	0.998963		-1.3001	0.99898		-1.3001	0.995648		-1.3001	0.99772		-1.3001	0.997704		-1.3001	1.00037		-1.3001	0.997339
-1.2501	0.996839		-1.25	0.998898		-1.25	0.998991		-1.2501	1.00019		-1.2501	0.99749		-1.2501	0.999175		-1.2501	1.00091		-1.2501	0.997156		-1.2501	0.99776		-1.2501	0.997509		-1.2501	0.998178		-1.2501	0.997971		-1.25	0.996969		-1.2501	0.998709		-1.2501	0.997116		-1.2501	0.996392
-1.2001	0.99821		-1.2	0.997773		-1.2	0.997735		-1.2001	0.996571		-1.2001	0.999601		-1.2001	0.997045		-1.2001	0.997993		-1.2001	0.999334		-1.2001	0.996411		-1.2001	0.998652		-1.2001	0.999369		-1.2001	0.995596		-1.2	0.999136		-1.2001	0.997351		-1.2001	0.99597		-1.2001	0.995175
-1.1501	0.997484		-1.15	0.996379		-1.15	0.997032		-1.1501	0.999829		-1.1501	0.998386		-1.1501	0.995739		-1.1501	0.996911		-1.1501	0.997777		-1.1501	0.998912		-1.1501	0.99648		-1.1501	0.998133		-1.15	0.995857		-1.15	0.997481		-1.1501	0.996546		-1.1501	0.997704		-1.1501	0.994936
-1.1001	0.99892		-1.1	0.996808		-1.1	0.997833		-1.1001	0.999558		-1.1001	0.997392		-1.1001	0.997026		-1.1001	0.999319		-1.1001	0.998671		-1.1001	0.995424		-1.1001	0.997843		-1.1001	0.998765		-1.1	0.998626		-1.1	0.998365		-1.1001	0.996658		-1.1001	1.00014		-1.1001	0.996224
-1.0501	0.999231		-1.05	0.99745		-1.05	0.996867		-1.0501	1.00131		-1.0501	0.998113		-1.0501	0.999396		-1.05	0.998085		-1.0501	0.999326		-1.0501	1.00046		-1.0501	0.998013		-1.0501	0.999554		-1.05	0.998968		-1.05	0.995151		-1.0501	0.996782		-1.0501	0.997576		-1.0501	0.994741
-1.0001	0.998905		-1	0.998296		-1	0.997069		-1.0001	1.00042		-1.0001	0.996522		-1.0001	0.999989		-1	0.997978		-1.0001	0.999596		-1.0001	0.998317		-1.0001	1.00025		-1.0001	0.996242		-1	0.996935		-1	0.99657		-1.0001	0.995619		-1.0001	0.998811		-1.0001	0.994095
-0.9501	0.995808		-0.95	0.997129		-0.95	0.995723		-0.9501	0.998436		-0.9501	0.995566		-0.95	0.998025		-0.95	0.996849		-0.9501	0.999442		-0.9501	0.999573		-0.9501	0.997249		-0.9501	0.999582		-0.95	0.996033		-0.95	0.997659		-0.9501	0.996591		-0.9501	0.997401		-0.9501	0.995918
-0.9001	0.996675		-0.9	0.997332		-0.9	0.997732		-0.9001	0.997944		-0.9001	0.998074		-0.9	0.996804		-0.9	0.999959		-0.9001	0.995551		-0.9001	0.998347		-0.9001	0.996553		-0.9001	0.999441		-0.9	0.998288		-0.9	0.997547		-0.9001	0.997571		-0.9001	0.998309		-0.9001	0.996928
-0.8501	0.995119		-0.85	1.0005		-0.85	0.99865		-0.8501	0.999091		-0.8501	0.994574		-0.85	0.996675		-0.85	0.997719		-0.8501	0.995203		-0.8501	0.998564		-0.8501	0.996598		-0.8501	0.999045		-0.85	0.996826		-0.85	0.995108		-0.8501	0.996238		-0.8501	1.00115		-0.8501	0.996117
-0.8001	0.995053		-0.8	0.99753		-0.8	1.00068		-0.8001	0.996728		-0.8001	1.00059		-0.8	0.994861		-0.8	0.999242		-0.8001	0.997497		-0.8001	0.99841		-0.8001	0.998624		-0.8001	0.998283		-0.8	0.996192		-0.8	0.993857		-0.8001	0.999139		-0.8001	0.996965		-0.8001	0.994741
-0.7501	0.996629		-0.75	1.00103		-0.75	0.996331		-0.7501	0.997639		-0.7501	0.997977		-0.75	0.996825		-0.75	0.997488		-0.7501	0.999747		-0.7501	0.995101		-0.7501	0.997938		-0.7501	0.996747		-0.75	0.998626		-0.75	0.996117		-0.7501	0.997378		-0.7501	0.995774		-0.7501	0.997686
-0.7	0.999318		-0.7	0.996576		-0.7	0.996147		-0.7001	0.999585		-0.7001	0.998946		-0.7	0.994141		-0.7	0.997064		-0.7001	0.997381		-0.7001	0.999079		-0.7001	0.997019		-0.7001	0.998159		-0.7	0.996842		-0.7	0.998114		-0.7001	0.995252		-0.7001	0.994717		-0.7001	0.993334
-0.65	0.998231		-0.65	0.997422		-0.65	0.99631		-0.6501	0.996624		-0.6501	0.998667		-0.65	0.998107		-0.65	0.992836		-0.6501	0.999128		-0.6501	0.998756		-0.65	0.997394		-0.6501	0.99876		-0.65	0.995892		-0.65	0.997709		-0.6501	0.994327		-0.6501	0.999745		-0.65	0.998613
-0.6	0.998653		-0.6	0.997954		-0.6	0.997855		-0.6001	0.996876		-0.6001	0.998967		-0.6	0.997142		-0.6	0.99734		-0.6001	0.994754		-0.6001	0.995657		-0.6	0.997988		-0.6001	0.998463		-0.6	0.996951		-0.6	0.999059		-0.6001	0.99679		-0.6001	0.99853		-0.6	0.993353
-0.55	0.9978		-0.55	0.995714		-0.55	0.998977		-0.5501	0.99831		-0.5501	0.999651		-0.55	0.996972		-0.55	0.996806		-0.5501	0.99517		-0.5501	0.998683		-0.55	0.99712		-0.5501	0.995371		-0.55	0.996439		-0.55	0.994348		-0.5501	0.997801		-0.5501	0.997389		-0.55	0.996214
-0.5	0.998782		-0.5	0.996666		-0.5	0.997198		-0.5001	0.998652		-0.5001	0.996471		-0.5	0.995808		-0.5	0.996215		-0.5001	0.993523		-0.5001	0.997199		-0.5	0.9979		-0.5001	0.996393		-0.5	0.996706		-0.5	0.994594		-0.5001	0.995086		-0.5001	0.993401		-0.5	0.996172
-0.45	0.997021		-0.45	0.999339		-0.45	0.998634		-0.4501	0.99686		-0.4501	0.997188		-0.45	0.995191		-0.45	0.997622		-0.4501	0.997692		-0.4501	0.99713		-0.45	0.998497		-0.45	0.995792		-0.45	0.997299		-0.45	0.99734		-0.4501	0.995058		-0.4501	0.995681		-0.45	0.997225
-0.4	0.996399		-0.4	0.996606		-0.4	0.995755		-0.4001	0.998241		-0.4001	0.998057		-0.4	0.99708		-0.4	0.998441		-0.4001	0.998332		-0.4001	1.00065		-0.4	0.997797		-0.4	0.997359		-0.4	0.997465		-0.4	1.0002		-0.4001	0.993469		-0.4001	1.00064		-0.4	0.992318
-0.35	0.999462		-0.35	0.997725		-0.35	0.997164		-0.3501	0.998022		-0.3501	0.996659		-0.35	0.999487		-0.35	0.997144		-0.3501	0.99706		-0.3501	0.998599		-0.35	0.993662		-0.35	0.999544		-0.35	0.999694		-0.35	0.997959		-0.3501	0.995178		-0.3501	0.996792		-0.35	0.994872
-0.3	0.997812		-0.3	0.998952		-0.3	1.00024		-0.3001	0.996216		-0.3001	0.994023		-0.3	0.992721		-0.3	0.99989		-0.3001	0.998137		-0.3001	0.99927		-0.3	0.996463		-0.3	0.99804		-0.3	0.995284		-0.3	0.996712		-0.3001	0.997697		-0.3001	0.996554		-0.3	0.995258
-0.25	0.99758		-0.25	0.997189		-0.25	0.997171		-0.2501	0.997753		-0.25	0.999621		-0.25	0.996156		-0.25	0.997365		-0.2501	0.999026		-0.2501	0.997785		-0.25	0.99652		-0.25	0.996631		-0.25	0.993452		-0.25	0.995405		-0.2501	0.997595		-0.2501	0.999391		-0.25	0.994363
-0.2	0.996998		-0.2	0.997453		-0.2	0.996735		-0.2001	0.996683		-0.2	0.996425		-0.2	0.996077		-0.2	0.996618		-0.2001	0.996403		-0.2001	0.99683		-0.2	0.997038		-0.2	0.99818		-0.2	0.99547		-0.2	0.996226		-0.2001	0.997712		-0.2001	0.996867		-0.2	0.992959
-0.15	0.997038		-0.15	0.998608		-0.15	0.997328		-0.15	0.995115		-0.15	0.997286		-0.15	0.996465		-0.15	0.997874		-0.1501	0.99833		-0.1501	0.99771		-0.15	0.997379		-0.15	0.996968		-0.15	0.993639		-0.15	0.997453		-0.1501	0.995601		-0.1501	0.997728		-0.15	0.992904
-0.0999999	1.00053		-0.0999999	1.00033		-0.0999999	0.998868		-0.0999999	0.99791		-0.0999999	0.99681		-0.0999999	0.996935		-0.0999999	0.997818		-0.1001	0.996111		-0.1001	0.997757		-0.0999999	0.996802		-0.0999999	0.99367		-0.0999999	0.995784		-0.0999999	0.997685		-0.1001	0.995003		-0.1001	0.995005		-0.0999999	0.993547
-0.05	0.99846		-0.05	0.9964		-0.05	0.996981		-0.05	0.998183		-0.05	0.997711		-0.05	0.995888		-0.05	0.997581		-0.0501001	0.997569		-0.0501001	0.997785		-0.05	0.996661		-0.05	0.997756		-0.05	0.998778		-0.05	0.997123		-0.0501001	0.996439		-0.0501001	1.00063		-0.05	0.991143
0	0.997709		0	0.99654		0	0.998527		0	0.997595		0	0.994782		0	0.996003		0	0.998245		0	0.996202		0	0.997997		0	0.994577		0	0.995895		0	0.997069		0	0.995911		0	0.994209		0	0.998495		0	0.994048
0.05	0.990698		0.05	0.991194		0.05	0.992079		0.05	0.987528		0.05	0.98903		0.05	0.987783		0.05	0.989146		0.0499001	0.989381		0.05	0.989346		0.05	0.989369		0.05	0.991042		0.05	0.987838		0.05	0.989909		0.0499001	0.986493		0.05	0.990136		0.05	0.984873
0.0999999	0.980281		0.0999999	0.978438		0.0999999	0.978109		0.0999999	0.981019		0.0999999	0.978283		0.0999999	0.976521		0.0999999	0.979304		0.0999999	0.978779		0.0999999	0.979043		0.0999999	0.976266		0.0999999	0.981713		0.0999999	0.975164		0.0999999	0.978576		0.0999999	0.974625		0.0999999	0.980664		0.0999999	0.972885
0.15	0.971427		0.15	0.970221		0.15	0.971767		0.15	0.97419		0.15	0.971742		0.15	0.969872		0.15	0.971328		0.15	0.975581		0.15	0.973229		0.15	0.970953		0.15	0.972138		0.15	0.968336		0.15	0.973938		0.15	0.969293		0.15	0.971254		0.15	0.965819
0.2	0.966026		0.2	0.967596		0.2	0.969187		0.2	0.967935		0.2	0.969512		0.2	0.966609		0.2	0.969634		0.2	0.971016		0.2	0.967714		0.2	0.966213		0.2	0.966514		0.2	0.965494		0.2	0.965315		0.2	0.962585		0.2	0.969011		0.2	0.960282
0.25	0.964221		0.25	0.963639		0.25	0.96185		0.25	0.962169		0.25	0.965345		0.25	0.964464		0.25	0.964108		0.25	0.962502		0.25	0.964237		0.25	0.963021		0.25	0.966165		0.25	0.963705		0.25	0.96494		0.25	0.961064		0.25	0.965342		0.25	0.955162
0.3	0.963297		0.3	0.960666		0.3	0.961881		0.3	0.959851		0.3	0.96542		0.3	0.962725		0.3	0.96212		0.3	0.960463		0.3	0.961018		0.3	0.959231		0.3	0.962189		0.3	0.960408		0.3	0.961878		0.3	0.955742		0.3	0.962735		0.3	0.954314
0.35	0.961875		0.35	0.960106		0.3501	0.95927		0.35	0.956412		0.35	0.959414		0.35	0.959942		0.35	0.959521		0.35	0.95819		0.35	0.95664		0.35	0.954963		0.35	0.95991		0.35	0.957384		0.35	0.958457		0.35	0.956643		0.35	0.957125		0.35	0.951887
0.4	0.960031		0.4	0.957186		0.4001	0.958009		0.4	0.957927		0.4	0.956525		0.4	0.959261		0.4	0.957989		0.4	0.957953		0.4	0.958653		0.4	0.955724		0.4	0.958771		0.4	0.951036		0.4	0.958807		0.4	0.949739		0.4	0.957762		0.4	0.949764
0.45	0.956985		0.4501	0.956769		0.4501	0.955068		0.45	0.95567		0.45	0.952818		0.45	0.954126		0.45	0.956833		0.45	0.955963		0.45	0.957274		0.45	0.952568		0.45	0.954129		0.45	0.951681		0.45	0.953594		0.45	0.947202		0.45	0.955778		0.45	0.945863
0.5	0.954032		0.5001	0.954055		0.5001	0.956199		0.5	0.95356		0.5	0.957664		0.5	0.954626		0.5	0.95168		0.5	0.95426		0.5	0.953966		0.5	0.952438		0.5	0.951913		0.5	0.947501		0.5	0.951478		0.5	0.946661		0.5	0.951967		0.5	0.943431
0.55	0.955003		0.5501	0.953734		0.5501	0.954244		0.55	0.952533		0.55	0.95268		0.55	0.952227		0.55	0.950442		0.55	0.950176		0.55	0.953188		0.55	0.946903		0.55	0.947905		0.55	0.946295		0.5501	0.950301		0.55	0.944812		0.55	0.953284		0.55	0.943041
0.6	0.948179		0.6001	0.948918		0.6001	0.949773		0.6	0.950025		0.6	0.946799		0.6	0.949099		0.6	0.948572		0.6	0.949949		0.6	0.952106		0.6	0.945163		0.6	0.951249		0.6	0.948427		0.6001	0.949356		0.6	0.942506		0.6	0.951085		0.6	0.939829
0.65	0.950955		0.6501	0.946958		0.6501	0.949353		0.65	0.954113		0.65	0.950234		0.65	0.94739		0.65	0.947826		0.65	0.948423		0.65	0.948184		0.65	0.946948		0.65	0.945842		0.6501	0.945678		0.6501	0.948099		0.65	0.942606		0.65	0.949154		0.65	0.940043
0.7	0.948931		0.7001	0.94687		0.7001	0.948077		0.7	0.947517		0.7	0.947747		0.7	0.94831		0.7	0.945652		0.7	0.946829		0.7	0.946491		0.7	0.944553		0.7	0.946741		0.7001	0.944706		0.7001	0.946991		0.7	0.939923		0.7	0.948204		0.7	0.935508
0.75	0.945524		0.7501	0.942057		0.7501	0.947224		0.75	0.948835		0.75	0.94574		0.75	0.944668		0.75	0.945332		0.75	0.945463		0.75	0.946269		0.75	0.943233		0.75	0.943393		0.7501	0.942406		0.7501	0.945023		0.75	0.940213		0.75	0.948396		0.75	0.934146
0.8	0.944962		0.8001	0.946353		0.8001	0.943693		0.8	0.945838		0.8	0.942506		0.8	0.943206		0.8001	0.943394		0.8	0.942678		0.8	0.940656		0.8	0.940367		0.8	0.943363		0.8001	0.944854		0.8001	0.943992		0.8	0.937041		0.8	0.94501		0.8	0.934384
0.85	0.942156		0.8501	0.9413		0.8501	0.94453		0.85	0.942017		0.85	0.943182		0.85	0.941954		0.8501	0.94552		0.85	0.943159		0.85	0.943728		0.85	0.940728		0.85	0.94181		0.8501	0.941227		0.8501	0.943499		0.85	0.936332		0.85	0.940843		0.85	0.932664
0.9	0.944872		0.9001	0.944004		0.9001	0.94267		0.9	0.938619		0.9	0.940793		0.9001	0.94234		0.9001	0.939445		0.9	0.940685		0.9	0.940058		0.9	0.937878		0.9	0.940648		0.9001	0.937025		0.9001	0.941525		0.9	0.934721		0.9	0.940382		0.9	0.931027
0.95	0.943209		0.9501	0.940031		0.9501	0.943093		0.95	0.940882		0.95	0.94047		0.9501	0.938761		0.9501	0.940921		0.95	0.938004		0.95	0.940033		0.95	0.937035		0.95	0.940483		0.9501	0.936174		0.9501	0.937414		0.95	0.934223		0.95	0.938778		0.95	0.930094
1	0.941085		1.0001	0.939727		1.0001	0.940458		1	0.941072		1	0.937518		1.0001	0.93992		1.0001	0.938657		1	0.937364		1	0.940825		1	0.937204		1	0.940898		1.0001	0.935836		1.0001	0.938218		1	0.931627		1	0.940392		1	0.929007
1.05	0.939351		1.0501	0.935372		1.0501	0.937657		1.05	0.940182		1.05	0.937129		1.0501	0.939419		1.0501	0.939378		1.05	0.937349		1.05	0.936165		1.05	0.936266		1.05	0.938746		1.0501	0.929321		1.0501	0.938705		1.05	0.929578		1.05	0.938523		1.05	0.926663
1.1001	0.936595		1.1001	0.937214		1.1001	0.936169		1.1	0.93612		1.1	0.939505		1.1001	0.936573		1.1001	0.936484		1.1	0.9358		1.1	0.939962		1.1	0.937295		1.1	0.934567		1.1001	0.935756		1.1001	0.937027		1.1	0.930593		1.1	0.936825		1.1	0.925698
1.1501	0.933197		1.1501	0.936676		1.1501	0.936679		1.15	0.937468		1.15	0.933916		1.1501	0.934816		1.1501	0.935299		1.15	0.933223		1.15	0.936144		1.15	0.934946		1.15	0.937868		1.1501	0.932741		1.1501	0.935666		1.15	0.926947		1.15	0.934196		1.15	0.923546
1.2001	0.935121		1.2001	0.934172		1.2001	0.933936		1.2	0.933752		1.2	0.934357		1.2001	0.933366		1.2001	0.932365		1.2	0.93378		1.2	0.934068		1.2001	0.930222		1.2	0.93531		1.2001	0.928767		1.2001	0.934787		1.2	0.927181		1.2	0.935463		1.2001	0.922238
1.2501	0.9361		1.2501	0.934255		1.2501	0.933751		1.25	0.934939		1.25	0.932938		1.2501	0.93398		1.2501	0.934857		1.25	0.933241		1.25	0.936098		1.2501	0.930542		1.25	0.933969		1.2501	0.929841		1.2501	0.93379		1.25	0.925025		1.25	0.934354		1.2501	0.922876
1.3001	0.933855		1.3001	0.932324		1.3001	0.935423		1.3	0.93397		1.3	0.934531		1.3001	0.933668		1.3001	0.930275		1.3	0.933125		1.3	0.933563		1.3001	0.931154		1.3	0.932795		1.3001	0.930197		1.3001	0.931525		1.3	0.925259		1.3	0.935528		1.3001	0.917041
1.3501	0.932001		1.3501	0.930371		1.3501	0.933459		1.35	0.936973		1.35	0.933455		1.3501	0.933164		1.3501	0.932668		1.35	0.928601		1.35	0.932002		1.3501	0.927963		1.3501	0.931477		1.3501	0.92704		1.3501	0.932885		1.35	0.926382		1.35	0.93044		1.3501	0.920948
1.4001	0.933667		1.4001	0.928738		1.4001	0.932311		1.4	0.930668		1.4	0.93071		1.4001	0.928921		1.4001	0.932749		1.4	0.928688		1.4	0.929357		1.4001	0.928386		1.4001	0.931694		1.4001	0.926308		1.4001	0.930389		1.4	0.927094		1.4	0.930741		1.4001	0.921681
1.4501	0.929797		1.4501	0.931891		1.4501	0.93241		1.45	0.929818		1.45	0.930551		1.4501	0.929343		1.4501	0.930298		1.45	0.93114		1.45	0.932329		1.4501	0.927521		1.4501	0.928331		1.4501	0.922751		1.4501	0.930867		1.45	0.919472		1.45	0.931928		1.4501	0.918835
1.5001	0.930867		1.5001	0.929934		1.5001	0.931508		1.5	0.928787		1.5	0.927524		1.5001	0.92908		1.5001	0.928263		1.5	0.92704		1.5	0.930453		1.5001	0.923119		1.5001	0.928453		1.5001	0.926316		1.5001	0.931924		1.5	0.923901		1.5	0.927874		1.5001	0.91486
1.5501	0.930178		1.5501	0.926856		1.5501	0.928639		1.55	0.931995		1.55	0.928609		1.5501	0.927718		1.5501	0.92685		1.55	0.927984		1.55	0.924496		1.5501	0.920835		1.5501	0.928682		1.5501	0.919291		1.5501	0.927267		1.55	0.922001		1.55	0.929107		1.5501	0.914185
1.6001	0.928548		1.6001	0.927073		1.6001	0.926514		1.6	0.928124		1.6001	0.925099		1.6001	0.926372		1.6001	0.929971		1.6	0.927356		1.6	0.92757		1.6001	0.92425		1.6001	0.927939		1.6001	0.923159		1.6001	0.927624		1.6	0.92158		1.6	0.928477		1.6001	0.91229
1.6501	0.925067		1.6501	0.929091		1.6501	0.927169		1.6501	0.929849		1.6501	0.929001		1.6501	0.924895		1.6501	0.926151		1.65	0.924829		1.65	0.92545		1.6501	0.923999		1.6501	0.924547		1.6501	0.921408		1.6501	0.927263		1.65	0.916554		1.65	0.927174		1.6501	0.911737
1.7001	0.928176		1.7001	0.926677		1.7001	0.928134		1.7001	0.925191		1.7001	0.927381		1.7001	0.924745		1.7001	0.926771		1.7	0.927537		1.7	0.923864		1.7001	0.923024		1.7001	0.926993		1.7001	0.922325		1.7001	0.925371		1.7	0.917084		1.7	0.924489		1.7001	0.911395
1.7501	0.924807		1.7501	0.925396		1.7501	0.926122		1.7501	0.922271		1.7501	0.928048		1.7501	0.925333		1.7501	0.926214		1.75	0.924784		1.75	0.925083		1.7501	0.922985		1.7501	0.925599		1.7501	0.920374		1.7501	0.924045		1.75	0.918598		1.75	0.926421		1.7501	0.912382
1.8001	0.923972		1.8001	0.923636		1.8001	0.923882		1.8001	0.923714		1.8001	0.926993		1.8001	0.924101		1.8001	0.924632		1.8	0.921689		1.8	0.922162		1.8001	0.921392		1.8001	0.921903		1.8001	0.916357		1.8001	0.92458		1.8	0.917218		1.8	0.922126		1.8001	0.911595
1.8501	0.925745		1.8501	0.919893		1.8501	0.923722		1.8501	0.921369		1.8501	0.922268		1.8501	0.921182		1.8501	0.921304		1.85	0.92218		1.8501	0.921214		1.8501	0.922227		1.8501	0.92443		1.8501	0.919483		1.8501	0.924539		1.85	0.9167		1.8501	0.923778		1.8501	0.910025
1.9001	0.926235		1.9001	0.92076		1.9001	0.922167		1.9001	0.923531		1.9001	0.921095		1.9001	0.919925		1.9001	0.921906		1.9001	0.919019		1.9001	0.925655		1.9001	0.921064		1.9001	0.921665		1.9001	0.920124		1.9001	0.922099		1.9001	0.91361		1.9001	0.923673		1.9001	0.906741
1.9501	0.921856		1.9501	0.922122		1.9501	0.923895		1.9501	0.92322		1.9501	0.922307		1.9501	0.920491		1.9501	0.92319		1.9501	0.919953		1.9501	0.92241		1.9501	0.919576		1.9501	0.920161		1.9501	0.914562		1.9501	0.920018		1.9501	0.911951		1.9501	0.921798		1.9501	0.906165
2.0001	0.921288		2.0001	0.924339		2.0001	0.921736		2.0001	0.920632		2.0001	0.919816		2.0001	0.917282		2.0001	0.920302		2.0001	0.920708		2.0001	0.921735		2.0001	0.919468		2.0001	0.920294		2.0001	0.918436		2.0001	0.918239		2.0001	0.913951		2.0001	0.922949		2.0001	0.904491
2.0501	0.920647		2.0501	0.91913		2.0501	0.921013		2.0501	0.921672		2.0501	0.920002		2.0501	0.9203		2.0501	0.920755		2.0501	0.92107		2.0501	0.918486		2.0501	0.9164		2.0501	0.920306		2.0501	0.917734		2.0501	0.920993		2.0501	0.912457		2.0501	0.920148		2.0501	0.905799
2.1001	0.921235		2.1001	0.921127		2.1001	0.921678		2.1001	0.920366		2.1001	0.919749		2.1001	0.921258		2.1001	0.918814		2.1001	0.919183		2.1001	0.920315		2.1001	0.917944		2.1001	0.920082		2.1001	0.912785		2.1001	0.91954		2.1001	0.911295		2.1001	0.918878		2.1001	0.904234
2.1501	0.916464		2.1501	0.919367		2.1502	0.918726		2.1501	0.920499		2.1501	0.917894		2.1501	0.919413		2.1501	0.918483		2.1501	0.915793		2.1501	0.917734		2.1501	0.915911		2.1501	0.917154		2.1501	0.915642		2.1501	0.918702		2.1501	0.908254		2.1501	0.919959		2.1501	0.903991
2.2001	0.918071		2.2001	0.918393		2.2002	0.9176		2.2001	0.916744		2.2001	0.918778		2.2001	0.916693		2.2001	0.920701		2.2001	0.915808		2.2001	0.919045		2.2001	0.916576		2.2001	0.918122		2.2001	0.912256		2.2001	0.916809		2.2001	0.909051		2.2001	0.919769		2.2001	0.902897
2.2501	0.918131		2.2502	0.917536		2.2502	0.919496		2.2501	0.91545		2.2501	0.917656		2.2501	0.9144		2.2501	0.914501		2.2501	0.914795		2.2501	0.916024		2.2501	0.914275		2.2501	0.919076		2.2501	0.912298		2.2501	0.918834		2.2501	0.908609		2.2501	0.91669		2.2501	0.900673
2.3001	0.91814		2.3002	0.916011		2.3002	0.919038		2.3001	0.91908		2.3001	0.916759		2.3001	0.917661		2.3001	0.916425		2.3001	0.91429		2.3001	0.91629		2.3001	0.913688		2.3001	0.917357		2.3001	0.909279		2.3001	0.916129		2.3001	0.905768		2.3001	0.918894		2.3001	0.902001
2.3501	0.917318		2.3502	0.917957		2.3502	0.914149		2.3501	0.914638		2.3501	0.915289		2.3501	0.914644		2.3501	0.91763		2.3501	0.91489		2.3501	0.920437		2.3501	0.911077		2.3501	0.913789		2.3501	0.912327		2.3502	0.914981		2.3501	0.906849		2.3501	0.915327		2.3501	0.901633
2.4001	0.916265		2.4002	0.9165		2.4002	0.914037		2.4001	0.91713		2.4001	0.916281		2.4001	0.915208		2.4001	0.915764		2.4001	0.916232		2.4001	0.914245		2.4001	0.909607		2.4001	0.91643		2.4001	0.908851		2.4002	0.916106		2.4001	0.905775		2.4001	0.915328		2.4001	0.899579
2.4501	0.91568		2.4502	0.915976		2.4502	0.914806		2.4501	0.915318		2.4501	0.914617		2.4501	0.914257		2.4501	0.917024		2.4501	0.915077		2.4501	0.915358		2.4501	0.913682		2.4501	0.913736		2.4501	0.907489		2.4502	0.914907		2.4501	0.905227		2.4501	0.91449		2.4501	0.900778
2.5001	0.913305		2.5002	0.91563		2.5002	0.91759		2.5001	0.913037		2.5001	0.913538		2.5001	0.912463		2.5001	0.915917		2.5001	0.912052		2.5001	0.912951		2.5001	0.909547		2.5001	0.913899		2.5002	0.909071		2.5002	0.914529		2.5001	0.905148		2.5001	0.912455		2.5001	0.898048
2.5501	0.913317		2.5502	0.913898		2.5502	0.91379		2.5501	0.913684		2.5501	0.91271		2.5501	0.913647		2.5501	0.911766		2.5501	0.91293		2.5501	0.913587		2.5501	0.907402		2.5501	0.913858		2.5502	0.908588		2.5502	0.918245		2.5501	0.902119		2.5501	0.913658		2.5501	0.898621
2.6001	0.911908		2.6002	0.910382		2.6002	0.911892		2.6001	0.911996		2.6001	0.907772		2.6001	0.910636		2.6002	0.911159		2.6001	0.91221		2.6001	0.911447		2.6001	0.90977		2.6001	0.912904		2.6002	0.90684		2.6002	0.913274		2.6001	0.900502		2.6001	0.910678		2.6001	0.897541
2.6501	0.912532		2.6502	0.915722		2.6502	0.911079		2.6501	0.909965		2.6501	0.912686		2.6501	0.913537		2.6502	0.912117		2.6501	0.91089		2.6501	0.913157		2.6501	0.909593		2.6501	0.912319		2.6502	0.908659		2.6502	0.909391		2.6501	0.904546		2.6501	0.914981		2.6501	0.894436
2.7001	0.909871		2.7002	0.912463		2.7002	0.914322		2.7001	0.912867		2.7001	0.912893		2.7002	0.910179		2.7002	0.911902		2.7001	0.909255		2.7001	0.911002		2.7001	0.906921		2.7001	0.909493		2.7002	0.906903		2.7002	0.912436		2.7001	0.902826		2.7001	0.908102		2.7001	0.896202
2.7501	0.912389		2.7502	0.911701		2.7502	0.910056		2.7501	0.913541		2.7501	0.910469		2.7502	0.910994		2.7502	0.91076		2.7501	0.910068		2.7501	0.910497		2.7501	0.908314		2.7501	0.911927		2.7502	0.906698		2.7502	0.912314		2.7501	0.901767		2.7501	0.910762		2.7501	0.895144
2.8001	0.911052		2.8002	0.911211		2.8002	0.911816		2.8001	0.91141		2.8001	0.909896		2.8002	0.908494		2.8002	0.910772		2.8001	0.908143		2.8001	0.910059		2.8001	0.907077		2.8001	0.910005		2.8002	0.905377		2.8002	0.907616		2.8001	0.90073		2.8001	0.909797		2.8001	0.893677
2.8501	0.910638		2.8502	0.91105		2.8502	0.912213		2.8501	0.911526		2.8501	0.908623		2.8502	0.904652		2.8502	0.908621		2.8501	0.909377		2.8501	0.908826		2.8501	0.906299		2.8501	0.907672		2.8502	0.906008		2.8502	0.909773		2.8501	0.898479		2.8501	0.908908		2.8501	0.893032
2.9001	0.911284		2.9002	0.908633		2.9002	0.910547		2.9001	0.910627		2.9001	0.910076		2.9002	0.907735		2.9002	0.909103		2.9001	0.908797		2.9001	0.910103		2.9001	0.906431		2.9001	0.910981		2.9002	0.904104		2.9002	0.909127		2.9001	0.898336		2.9001	0.909488		2.9001	0.895135
2.9502	0.909968		2.9502	0.910167		2.9502	0.909974		2.9501	0.911283		2.9501	0.908118		2.9502	0.906487		2.9502	0.910034		2.9501	0.907748		2.9501	0.908227		2.9501	0.906713		2.9501	0.907974		2.9502	0.904024		2.9502	0.909724		2.9501	0.897709		2.9501	0.910824		2.9501	0.892523
3.0002	0.908952		3.0002	0.908015		3.0002	0.910035		3.0001	0.9084		3.0001	0.90784		3.0002	0.906827		3.0002	0.909159		3.0001	0.905603		3.0001	0.911101		3.0002	0.905953		3.0001	0.906614		3.0002	0.904625		3.0002	0.90598		3.0001	0.898551		3.0001	0.909518		3.0002	0.89076
3.0502	0.90648		3.0502	0.906321		3.0502	0.908066		3.0501	0.908684		3.0501	0.908837		3.0502	0.903498		3.0502	0.909475		3.0501	0.906172		3.0501	0.906633		3.0502	0.903597		3.0501	0.906863		3.0502	0.90115		3.0502	0.90838		3.0501	0.896111		3.0501	0.906537		3.0502	0.892768
3.1002	0.908064		3.1002	0.907597		3.1002	0.9081		3.1001	0.908558		3.1001	0.907469		3.1002	0.904144		3.1002	0.906568		3.1001	0.905681		3.1001	0.90748		3.1002	0.903934		3.1001	0.906549		3.1002	0.899185		3.1002	0.908711		3.1001	0.896446		3.1001	0.909124		3.1002	0.890981
3.1502	0.9073		3.1502	0.905381		3.1502	0.906182		3.1501	0.906651		3.1501	0.909235		3.1502	0.905387		3.1502	0.905769		3.1501	0.904522		3.1501	0.903919		3.1502	0.90267		3.1502	0.907288		3.1502	0.899164		3.1502	0.906438		3.1501	0.893023		3.1501	0.907999		3.1502	0.892622
3.2002	0.905772		3.2002	0.907769		3.2002	0.904556		3.2001	0.905256		3.2001	0.906147		3.2002	0.905171		3.2002	0.903815		3.2001	0.905315		3.2001	0.909918		3.2002	0.904236		3.2002	0.907707		3.2002	0.900892		3.2002	0.908293		3.2001	0.897549		3.2001	0.907619		3.2002	0.892885
3.2502	0.907133		3.2502	0.906117		3.2502	0.903972		3.2501	0.903659		3.2501	0.90353		3.2502	0.902083		3.2502	0.903564		3.2501	0.903566		3.2501	0.903764		3.2502	0.902082		3.2502	0.905008		3.2502	0.900701		3.2502	0.905177		3.2501	0.896107		3.2501	0.906012		3.2502	0.887714
3.3002	0.904398		3.3002	0.90571		3.3002	0.905033		3.3001	0.906756		3.3001	0.905704		3.3002	0.904789		3.3002	0.904352		3.3001	0.902913		3.3001	0.904207		3.3002	0.900326		3.3002	0.905274		3.3002	0.897847		3.3002	0.905112		3.3001	0.895066		3.3001	0.904602		3.3002	0.889252
3.3502	0.905422		3.3502	0.904411		3.3502	0.902906		3.3501	0.903702		3.3501	0.907589		3.3502	0.903178		3.3502	0.902482		3.3501	0.902153		3.3501	0.906468		3.3502	0.901131		3.3502	0.905771		3.3502	0.900568		3.3502	0.903245		3.3501	0.891053		3.3501	0.904719		3.3502	0.888054
3.4002	0.903922		3.4002	0.905026		3.4002	0.904808		3.4001	0.901758		3.4002	0.903768		3.4002	0.904158		3.4002	0.905133		3.4001	0.900647		3.4001	0.902586		3.4002	0.900598		3.4002	0.904479		3.4002	0.899718		3.4002	0.903773		3.4001	0.895018		3.4001	0.904349		3.4002	0.890444
3.4502	0.903104		3.4502	0.901366		3.4502	0.90358		3.4502	0.903076		3.4502	0.901634		3.4502	0.90242		3.4502	0.903549		3.4501	0.900378		3.4501	0.903188		3.4502	0.898602		3.4502	0.90237		3.4502	0.895481		3.4502	0.904871		3.4501	0.894145		3.4501	0.903861		3.4502	0.887596
3.5002	0.901277		3.5002	0.900468		3.5002	0.903547		3.5002	0.900465		3.5002	0.902155		3.5002	0.90224		3.5002	0.903141		3.5001	0.901793		3.5001	0.899159		3.5002	0.897577		3.5002	0.899507		3.5002	0.894642		3.5002	0.901702		3.5001	0.892745		3.5001	0.904166		3.5002	0.886426
3.5502	0.903936		3.5502	0.902211		3.5502	0.904426		3.5502	0.899691		3.5502	0.902613		3.5502	0.899135		3.5502	0.901941		3.5501	0.901305		3.5501	0.901332		3.5502	0.89856		3.5502	0.9004		3.5502	0.896019		3.5502	0.902838		3.5501	0.893888		3.5501	0.900753		3.5502	0.886921
3.6002	0.903562		3.6002	0.903912		3.6002	0.901452		3.6002	0.902857		3.6002	0.903817		3.6002	0.899711		3.6002	0.901929		3.6001	0.898942		3.6001	0.900129		3.6002	0.897877		3.6002	0.900435		3.6002	0.897371		3.6002	0.899953		3.6001	0.890581		3.6001	0.903894		3.6002	0.882979
3.6502	0.900546		3.6502	0.901898		3.6502	0.901165		3.6502	0.900474		3.6502	0.901905		3.6502	0.900634		3.6502	0.89966		3.6501	0.899389		3.6501	0.900121		3.6502	0.896713		3.6502	0.898379		3.6502	0.89561		3.6502	0.90096		3.6501	0.890241		3.6501	0.900485		3.6502	0.882023
3.7002	0.901039		3.7002	0.901811		3.7002	0.901579		3.7002	0.902183		3.7002	0.901337		3.7002	0.900968		3.7002	0.903422		3.7001	0.895281		3.7002	0.900281		3.7002	0.898279		3.7002	0.898775		3.7002	0.8934		3.7002	0.901358		3.7001	0.889639		3.7002	0.903555		3.7002	0.885071
3.7502	0.900043		3.7502	0.901032		3.7502	0.898949		3.7502	0.900615		3.7502	0.899809		3.7502	0.897696		3.7502	0.899499		3.7502	0.901178		3.7502	0.898853		3.7502	0.897475		3.7502	0.901398		3.7502	0.895849		3.7502	0.898379		3.7502	0.889948		3.7502	0.896183		3.7502	0.881222
3.8002	0.901521		3.8002	0.901278		3.8002	0.901471		3.8002	0.898791		3.8002	0.899628		3.8002	0.896443		3.8002	0.899183		3.8002	0.898898		3.8002	0.896765		3.8002	0.89353		3.8002	0.898832		3.8002	0.89242		3.8002	0.898556		3.8002	0.889461		3.8002	0.899673		3.8002	0.883639
3.8502	0.898875		3.8502	0.898737		3.8502	0.901161		3.8502	0.897008		3.8502	0.896916		3.8502	0.898537		3.8502	0.898464		3.8502	0.896599		3.8502	0.897246		3.8502	0.893658		3.8502	0.898011		3.8502	0.890994		3.8502	0.899185		3.8502	0.890046		3.8502	0.898961		3.8502	0.881904
3.9002	0.897539		3.9002	0.899522		3.9002	0.897566		3.9002	0.8988		3.9002	0.896809		3.9002	0.899828		3.9002	0.898408		3.9002	0.895531		3.9002	0.8988		3.9002	0.89557		3.9002	0.897925		3.9002	0.893077		3.9002	0.901619		3.9002	0.887868		3.9002	0.897847		3.9002	0.882171
3.9502	0.89825		3.9502	0.898214		3.9502	0.896746		3.9502	0.898828		3.9502	0.897875		3.9502	0.898983		3.9502	0.89586		3.9502	0.90029		3.9502	0.900943		3.9502	0.893871		3.9502	0.899112		3.9502	0.893076		3.9502	0.898646		3.9502	0.889387		3.9502	0.89928		3.9502	0.880807
4.0002	0.899447		4.0002	0.897663		4.0003	0.898187		4.0002	0.895918		4.0002	0.895789		4.0002	0.894315		4.0002	0.897342		4.0002	0.899314		4.0002	0.896887		4.0002	0.89551		4.0002	0.896078		4.0002	0.8926		4.0002	0.898415		4.0002	0.889884		4.0002	0.899103		4.0002	0.880657
4.0502	0.897071		4.0503	0.896121		4.0503	0.898634		4.0502	0.898861		4.0502	0.895213		4.0502	0.895017		4.0502	0.898898		4.0502	0.89612		4.0502	0.897856		4.0502	0.893774		4.0502	0.896378		4.0502	0.892072		4.0502	0.89777		4.0502	0.88591		4.0502	0.898089		4.0502	0.882419
4.1002	0.898098		4.1003	0.89912		4.1003	0.897122		4.1002	0.894923		4.1002	0.899066		4.1002	0.895625		4.1002	0.89743		4.1002	0.899594		4.1002	0.899059		4.1002	0.891919		4.1002	0.896551		4.1002	0.89028		4.1002	0.894627		4.1002	0.88659		4.1002	0.897507		4.1002	0.878735
4.1502	0.898622		4.1503	0.898444		4.1503	0.895446		4.1502	0.894397		4.1502	0.894639		4.1502	0.893258		4.1502	0.895099		4.1502	0.897668		4.1502	0.89536		4.1502	0.893955		4.1502	0.898773		4.1502	0.891991		4.1502	0.896086		4.1502	0.884832		4.1502	0.897937		4.1502	0.879611
4.2002	0.897455		4.2003	0.896387		4.2003	0.894426		4.2002	0.896987		4.2002	0.896779		4.2002	0.893374		4.2002	0.89402		4.2002	0.891406		4.2002	0.89586		4.2002	0.892719		4.2002	0.895917		4.2002	0.889422		4.2003	0.896804		4.2002	0.882829		4.2002	0.896624		4.2002	0.879669
4.2502	0.895633		4.2503	0.894759		4.2503	0.896459		4.2502	0.897741		4.2502	0.892315		4.2502	0.892942		4.2502	0.893761		4.2502	0.894379		4.2502	0.894394		4.2502	0.892221		4.2502	0.894055		4.2502	0.890446		4.2503	0.89461		4.2502	0.882887		4.2502	0.896249		4.2502	0.879497
4.3002	0.892359		4.3003	0.895723		4.3003	0.895909		4.3002	0.898679		4.3002	0.896444		4.3002	0.894456		4.3002	0.893563		4.3002	0.893242		4.3002	0.891646		4.3002	0.89024		4.3002	0.896328		4.3003	0.889372		4.3003	0.895062		4.3002	0.882684		4.3002	0.895292		4.3002	0.878735
4.3502	0.893787		4.3503	0.895688		4.3503	0.89452		4.3502	0.895323		4.3502	0.894596		4.3502	0.893458		4.3502	0.894483		4.3502	0.891176		4.3502	0.893506		4.3502	0.893568		4.3502	0.89425		4.3503	0.887324		4.3503	0.893601		4.3502	0.88574		4.3502	0.893045		4.3502	0.875686
4.4002	0.896682		4.4003	0.89519		4.4003	0.89432		4.4002	0.895808		4.4002	0.894847		4.4002	0.892512		4.4002	0.894345		4.4002	0.894055		4.4002	0.892655		4.4002	0.889444		4.4002	0.896213		4.4003	0.885367		4.4003	0.895523		4.4002	0.885073		4.4002	0.896076		4.4002	0.876553
4.4502	0.894327		4.4503	0.897266		4.4503	0.897181		4.4502	0.894047		4.4502	0.892949		4.4502	0.891906		4.4503	0.892582		4.4502	0.890381		4.4502	0.894607		4.4502	0.88975		4.4502	0.890103		4.4503	0.888068		4.4503	0.893583		4.4502	0.885469		4.4502	0.894548		4.4502	0.874955
4.5002	0.891799		4.5003	0.894095		4.5003	0.894824		4.5002	0.894136		4.5002	0.892487		4.5002	0.891953		4.5003	0.894109		4.5002	0.889453		4.5002	0.895304		4.5002	0.890837		4.5002	0.89372		4.5003	0.887216		4.5003	0.895947		4.5002	0.880859		4.5002	0.894721		4.5002	0.87555
4.5502	0.892847		4.5503	0.893779		4.5503	0.894288		4.5502	0.892751		4.5502	0.894254		4.5503	0.890559		4.5503	0.893671		4.5502	0.889808		4.5502	0.892537		4.5502	0.88976		4.5502	0.894393		4.5503	0.885743		4.5503	0.893212		4.5502	0.882799		4.5502	0.890715		4.5502	0.87668
4.6002	0.893925		4.6003	0.89436		4.6003	0.89368		4.6002	0.892316		4.6002	0.894392		4.6003	0.890346		4.6003	0.891952		4.6002	0.891361		4.6002	0.892344		4.6002	0.888053		4.6002	0.893891		4.6003	0.88656		4.6003	0.893468		4.6002	0.882252		4.6002	0.894956		4.6002	0.872696
4.6502	0.890366		4.6503	0.891157		4.6503	0.891513		4.6502	0.892142		4.6502	0.896313		4.6503	0.890454		4.6503	0.889594		4.6502	0.889359		4.6502	0.893179		4.6502	0.889596		4.6502	0.892053		4.6503	0.884482		4.6503	0.891791		4.6502	0.879142		4.6502	0.893293		4.6502	0.874179
4.7002	0.895562		4.7003	0.889284		4.7003	0.890178		4.7002	0.890932		4.7002	0.892593		4.7003	0.892732		4.7003	0.894671		4.7002	0.889712		4.7002	0.892158		4.7002	0.887602		4.7002	0.88804		4.7003	0.884143		4.7003	0.890968		4.7002	0.877946		4.7002	0.893018		4.7002	0.873803
4.7503	0.895423		4.7503	0.89078		4.7503	0.893147		4.7502	0.891898		4.7502	0.891796		4.7503	0.891465		4.7503	0.893579		4.7502	0.889413		4.7502	0.88923		4.7502	0.887136		4.7502	0.890725		4.7503	0.884865		4.7503	0.891414		4.7502	0.881849		4.7502	0.888265		4.7502	0.872794
4.8003	0.889252		4.8003	0.891492		4.8003	0.890132		4.8002	0.893618		4.8002	0.89242		4.8003	0.888881		4.8003	0.893268		4.8002	0.891606		4.8002	0.891785		4.8002	0.887545		4.8002	0.889018		4.8003	0.883069		4.8003	0.890509		4.8002	0.876352		4.8002	0.890734		4.8002	0.87367
4.8503	0.891482		4.8503	0.893696		4.8503	0.892384		4.8502	0.893367		4.8502	0.887784		4.8503	0.889668		4.8503	0.894449		4.8502	0.886749		4.8502	0.893773		4.8503	0.886863		4.8502	0.892306		4.8503	0.88322		4.8503	0.891111		4.8502	0.87917		4.8502	0.893022		4.8503	0.87102
4.9003	0.892347		4.9003	0.891495		4.9003	0.890199		4.9002	0.891666		4.9002	0.892302		4.9003	0.889674		4.9003	0.890851		4.9002	0.888519		4.9002	0.889057		4.9003	0.886396		4.9002	0.8892		4.9003	0.885346		4.9003	0.893228		4.9002	0.87782		4.9002	0.889937		4.9003	0.873231
4.9503	0.893107		4.9503	0.891876		4.9503	0.891288		4.9502	0.890263		4.9502	0.888649		4.9503	0.888348		4.9503	0.890996		4.9502	0.887753		4.9502	0.890953		4.9503	0.885596		4.9502	0.888319		4.9503	0.883314		4.9503	0.887925		4.9502	0.87867		4.9502	0.892052		4.9503	0.87021
5.0003	0.892157		5.0003	0.888842		5.0003	0.889852		5.0002	0.890563		5.0002	0.889622		5.0003	0.887834		5.0003	0.889972		5.0002	0.888596		5.0002	0.888925		5.0003	0.885473		5.0003	0.892006		5.0003	0.882887		5.0003	0.888738		5.0002	0.876725		5.0002	0.890069		5.0003	0.872245
5.0503	0.88839		5.0503	0.891146		5.0503	0.889444		5.0502	0.888693		5.0502	0.889061		5.0503	0.889953		5.0503	0.886632		5.0502	0.888151		5.0502	0.887948		5.0503	0.888072		5.0503	0.890748		5.0503	0.881874		5.0503	0.887112		5.0502	0.877702		5.0502	0.89166		5.0503	0.870731
5.1003	0.888111		5.1003	0.889575		5.1003	0.889004		5.1002	0.891996		5.1002	0.888967		5.1003	0.888635		5.1003	0.890818		5.1002	0.885554		5.1002	0.889903		5.1003	0.884772		5.1003	0.88882		5.1003	0.880987		5.1003	0.888402		5.1002	0.877734		5.1002	0.887941		5.1003	0.868861
5.1503	0.890901		5.1503	0.889394		5.1503	0.887518		5.1502	0.888872		5.1502	0.887856		5.1503	0.88655		5.1503	0.888997		5.1502	0.887193		5.1502	0.889347		5.1503	0.883486		5.1503	0.886828		5.1503	0.882398		5.1503	0.887687		5.1502	0.877514		5.1502	0.890447		5.1503	0.872083
5.2003	0.887415		5.2003	0.88717		5.2003	0.888371		5.2002	0.886686		5.2002	0.890614		5.2003	0.885412		5.2003	0.887043		5.2002	0.888297		5.2002	0.885327		5.2003	0.884389		5.2003	0.88941		5.2003	0.879815		5.2003	0.888174		5.2002	0.877072		5.2002	0.885793		5.2003	0.869546
5.2503	0.889636		5.2503	0.887811		5.2503	0.887441		5.2502	0.888989		5.2503	0.887712		5.2503	0.886		5.2503	0.889123		5.2502	0.885914		5.2502	0.887016		5.2503	0.883072		5.2503	0.886827		5.2503	0.880911		5.2503	0.88597		5.2502	0.876548		5.2502	0.885653		5.2503	0.868843
5.3003	0.890234		5.3003	0.888417		5.3003	0.887826		5.3003	0.88564		5.3003	0.886		5.3003	0.887638		5.3003	0.887675		5.3002	0.887088		5.3002	0.886198		5.3003	0.88491		5.3003	0.886823		5.3003	0.879893		5.3003	0.886814		5.3002	0.875911		5.3002	0.889917		5.3003	0.86778
5.3503	0.887398		5.3503	0.888042		5.3503	0.88502		5.3503	0.886843		5.3503	0.886304		5.3503	0.886981		5.3503	0.885416		5.3502	0.885166		5.3502	0.886622		5.3503	0.881536		5.3503	0.888831		5.3503	0.880331		5.3503	0.887391		5.3502	0.877853		5.3502	0.889366		5.3503	0.869308
5.4003	0.890153		5.4003	0.886772		5.4003	0.888137		5.4003	0.889696		5.4003	0.886781		5.4003	0.885496		5.4003	0.887154		5.4002	0.884295		5.4002	0.887183		5.4003	0.882832		5.4003	0.883929		5.4003	0.879574		5.4003	0.88805		5.4002	0.87579		5.4002	0.887692		5.4003	0.8681
5.4503	0.886125		5.4503	0.887174		5.4503	0.886014		5.4503	0.887898		5.4503	0.885773		5.4503	0.886441		5.4503	0.884072		5.4502	0.88386		5.4502	0.8864		5.4503	0.881405		5.4503	0.88331		5.4503	0.874543		5.4503	0.885717		5.4502	0.875146		5.4502	0.886623		5.4503	0.868298
5.5003	0.890173		5.5003	0.885672		5.5003	0.887172		5.5003	0.889904		5.5003	0.889253		5.5003	0.885337		5.5003	0.88465		5.5002	0.883374		5.5003	0.884601		5.5003	0.882794		5.5003	0.886209		5.5003	0.880325		5.5003	0.886622		5.5002	0.874268		5.5003	0.885717		5.5003	0.867114
5.5503	0.885017		5.5503	0.885261		5.5503	0.885716		5.5503	0.886562		5.5503	0.886759		5.5503	0.88165		5.5503	0.885666		5.5503	0.883582		5.5503	0.883853		5.5503	0.880814		5.5503	0.886221		5.5503	0.87952		5.5503	0.88514		5.5503	0.873835		5.5503	0.882983		5.5503	0.865709
5.6003	0.887525		5.6003	0.886691		5.6003	0.886896		5.6003	0.883802		5.6003	0.88496		5.6003	0.880806		5.6003	0.885842		5.6003	0.882692		5.6003	0.887547		5.6003	0.881462		5.6003	0.881856		5.6003	0.878913		5.6003	0.88654		5.6003	0.877399		5.6003	0.885849		5.6003	0.865645
5.6503	0.884041		5.6503	0.88407		5.6503	0.88572		5.6503	0.884144		5.6503	0.886846		5.6503	0.883911		5.6503	0.885121		5.6503	0.881854		5.6503	0.886645		5.6503	0.880085		5.6503	0.88319		5.6503	0.876663		5.6503	0.886229		5.6503	0.873505		5.6503	0.883509		5.6503	0.866326
5.7003	0.885019		5.7003	0.887335		5.7003	0.885622		5.7003	0.88525		5.7003	0.886684		5.7003	0.884443		5.7003	0.88406		5.7003	0.881252		5.7003	0.887329		5.7003	0.88218		5.7003	0.883		5.7003	0.880132		5.7003	0.884444		5.7003	0.870551		5.7003	0.883492		5.7003	0.866626
5.7503	0.883546		5.7503	0.883933		5.7503	0.886014		5.7503	0.885796		5.7503	0.885331		5.7503	0.884394		5.7503	0.88167		5.7503	0.880436		5.7503	0.882596		5.7503	0.88077		5.7503	0.883295		5.7503	0.877604		5.7503	0.882534		5.7503	0.871298		5.7503	0.882438		5.7503	0.866729
5.8003	0.886263		5.8003	0.880574		5.8004	0.885577		5.8003	0.885237		5.8003	0.884613		5.8003	0.884283		5.8003	0.885018		5.8003	0.88131		5.8003	0.88504		5.8003	0.877429		5.8003	0.883982		5.8003	0.878639		5.8003	0.881758		5.8003	0.872552		5.8003	0.882636		5.8003	0.864335
5.8503	0.884252		5.8503	0.881348		5.8504	0.883541		5.8503	0.882911		5.8503	0.882429		5.8503	0.88513		5.8503	0.88404		5.8503	0.880591		5.8503	0.881845		5.8503	0.878849		5.8503	0.882144		5.8503	0.877888		5.8503	0.882986		5.8503	0.868805		5.8503	0.882303		5.8503	0.86644
5.9003	0.883016		5.9004	0.884409		5.9004	0.884572		5.9003	0.882543		5.9003	0.886417		5.9003	0.881864		5.9003	0.884442		5.9003	0.880334		5.9003	0.883785		5.9003	0.878773		5.9003	0.883819		5.9003	0.87524		5.9003	0.885176		5.9003	0.871124		5.9003	0.884182		5.9003	0.865485
5.9503	0.885206		5.9504	0.882463		5.9504	0.882912		5.9503	0.883806		5.9503	0.881368		5.9503	0.88156		5.9503	0.882423		5.9503	0.880427		5.9503	0.880593		5.9503	0.87803		5.9503	0.882718		5.9503	0.87857		5.9503	0.885093		5.9503	0.8722		5.9503	0.881709		5.9503	0.862944
6.0003	0.883249		6.0004	0.883526		6.0004	0.880988		6.0003	0.882597		6.0003	0.883695		6.0003	0.882714		6.0003	0.883499		6.0003	0.880348		6.0003	0.884491		6.0003	0.877712		6.0003	0.880821		6.0003	0.875195		6.0004	0.88044		6.0003	0.869645		6.0003	0.88342		6.0003	0.862923
6.0503	0.883438		6.0504	0.883029		6.0504	0.883119		6.0503	0.883424		6.0503	0.886043		6.0503	0.884102		6.0503	0.881732		6.0503	0.878191		6.0503	0.882687		6.0503	0.877774		6.0503	0.881075		6.0503	0.876263		6.0504	0.882893		6.0503	0.868483		6.0503	0.881863		6.0503	0.864858
6.1003	0.882796		6.1004	0.881038		6.1004	0.882653		6.1003	0.881056		6.1003	0.880408		6.1003	0.880388		6.1003	0.882321		6.1003	0.87914		6.1003	0.883761		6.1003	0.880001		6.1003	0.881555		6.1003	0.875039		6.1004	0.883999		6.1003	0.868601		6.1003	0.882988		6.1003	0.861711
6.1503	0.882545		6.1504	0.882535		6.1504	0.882114		6.1503	0.882375		6.1503	0.882943		6.1503	0.880172		6.1503	0.87961		6.1503	0.881193		6.1503	0.882117		6.1503	0.876529		6.1503	0.88183		6.1504	0.875274		6.1504	0.879446		6.1503	0.868626		6.1503	0.883042		6.1503	0.862344
6.2003	0.881345		6.2004	0.883205		6.2004	0.882417		6.2003	0.881697		6.2003	0.882325		6.2003	0.880333		6.2003	0.882089		6.2003	0.879849		6.2003	0.881284		6.2003	0.874543		6.2003	0.882701		6.2004	0.873348		6.2004	0.883015		6.2003	0.870905		6.2003	0.879495		6.2003	0.860994
6.2503	0.882226		6.2504	0.881906		6.2504	0.882358		6.2503	0.882013		6.2503	0.883571		6.2503	0.878911		6.2504	0.878736		6.2503	0.879321		6.2503	0.880894		6.2503	0.876462		6.2503	0.878931		6.2504	0.873488		6.2504	0.881241		6.2503	0.869293		6.2503	0.881872		6.2503	0.860278
6.3003	0.881833		6.3004	0.88109		6.3004	0.879954		6.3003	0.88381		6.3003	0.883014		6.3003	0.879601		6.3004	0.881061		6.3003	0.878461		6.3003	0.880524		6.3003	0.878483		6.3003	0.879117		6.3004	0.874944		6.3004	0.883433		6.3003	0.866659		6.3003	0.881472		6.3003	0.862481
6.3503	0.879526		6.3504	0.877468		6.3504	0.880812		6.3503	0.880561		6.3503	0.881368		6.3504	0.877905		6.3504	0.880668		6.3503	0.876251		6.3503	0.87942		6.3503	0.87678		6.3503	0.881334		6.3504	0.873159		6.3504	0.883839		6.3503	0.866474		6.3503	0.879075		6.3503	0.862511
6.4003	0.88149		6.4004	0.882046		6.4004	0.882718		6.4003	0.880713		6.4003	0.880944		6.4004	0.878037		6.4004	0.880172		6.4003	0.876723		6.4003	0.879228		6.4003	0.876667		6.4003	0.883678		6.4004	0.873372		6.4004	0.88215		6.4003	0.869696		6.4003	0.880505		6.4003	0.859983
6.4503	0.882117		6.4504	0.878381		6.4504	0.879695		6.4503	0.879985		6.4503	0.877874		6.4504	0.879171		6.4504	0.880722		6.4503	0.876328		6.4503	0.878954		6.4503	0.874937		6.4503	0.877767		6.4504	0.873904		6.4504	0.882204		6.4503	0.867935		6.4503	0.880423		6.4503	0.85894
6.5003	0.879078		6.5004	0.881238		6.5004	0.878665		6.5003	0.878856		6.5003	0.878849		6.5004	0.877452		6.5004	0.880249		6.5003	0.878705		6.5003	0.879958		6.5003	0.876737		6.5003	0.878924		6.5004	0.871749		6.5004	0.877609		6.5003	0.869963		6.5003	0.880689		6.5003	0.86136
6.5503	0.878862		6.5504	0.880548		6.5504	0.880334		6.5503	0.879381		6.5503	0.879019		6.5504	0.876239		6.5504	0.882364		6.5503	0.875271		6.5503	0.879559		6.5503	0.875771		6.5503	0.876382		6.5504	0.87258		6.5504	0.881176		6.5503	0.865867		6.5503	0.879788		6.5503	0.860791
6.6004	0.880516		6.6004	0.881121		6.6004	0.879774		6.6003	0.879583		6.6003	0.880829		6.6004	0.877086		6.6004	0.880106		6.6003	0.877512		6.6003	0.881168		6.6003	0.872289		6.6003	0.876529		6.6004	0.871902		6.6004	0.881339		6.6003	0.867094		6.6003	0.877069		6.6003	0.857501
6.6504	0.87815		6.6504	0.878475		6.6504	0.880809		6.6503	0.879661		6.6503	0.881412		6.6504	0.876096		6.6504	0.878541		6.6503	0.880185		6.6503	0.878493		6.6504	0.876912		6.6503	0.876529		6.6504	0.872639		6.6504	0.880687		6.6503	0.868325		6.6503	0.880346		6.6504	0.856764
6.7004	0.876167		6.7004	0.878439		6.7004	0.881239		6.7003	0.877485		6.7003	0.877681		6.7004	0.876203		6.7004	0.880977		6.7003	0.878577		6.7003	0.880234		6.7004	0.873224		6.7003	0.87725		6.7004	0.87046		6.7004	0.880384		6.7003	0.864896		6.7003	0.881762		6.7004	0.857655
6.7504	0.88207		6.7504	0.877746		6.7504	0.878887		6.7503	0.879547		6.7503	0.875999		6.7504	0.87884		6.7504	0.879869		6.7503	0.875019		6.7503	0.878158		6.7504	0.875143		6.7503	0.878817		6.7504	0.870582		6.7504	0.880155		6.7503	0.862687		6.7503	0.876861		6.7504	0.857471
6.8004	0.877848		6.8004	0.877481		6.8004	0.880003		6.8003	0.878093		6.8003	0.879295		6.8004	0.879291		6.8004	0.875914		6.8003	0.875017		6.8003	0.876972		6.8004	0.874072		6.8004	0.87785		6.8004	0.870275		6.8004	0.878124		6.8003	0.864755		6.8003	0.87939		6.8004	0.857735
6.8504	0.878741		6.8504	0.878696		6.8504	0.873961		6.8503	0.877422		6.8503	0.879604		6.8504	0.877194		6.8504	0.877594		6.8503	0.874306		6.8503	0.877899		6.8504	0.872387		6.8504	0.875465		6.8504	0.868546		6.8504	0.877465		6.8503	0.864721		6.8503	0.879651		6.8504	0.856537
6.9004	0.879073		6.9004	0.879795		6.9004	0.875833		6.9003	0.879868		6.9003	0.878385		6.9004	0.875281		6.9004	0.877252		6.9003	0.877109		6.9003	0.8761		6.9004	0.873005		6.9004	0.877654		6.9004	0.870654		6.9004	0.876316		6.9003	0.866301		6.9003	0.880047		6.9004	0.85645
6.9504	0.877004		6.9504	0.879253		6.9504	0.87735		6.9503	0.874894		6.9503	0.877101		6.9504	0.8743		6.9504	0.876452		6.9503	0.876318		6.9503	0.877501		6.9504	0.874011		6.9504	0.8765		6.9504	0.870904		6.9504	0.878643		6.9503	0.864349		6.9503	0.876515		6.9504	0.854968
7.0004	0.876325		7.0004	0.874829		7.0004	0.875688		7.0003	0.876377		7.0003	0.879242		7.0004	0.877243		7.0004	0.87524		7.0003	0.873329		7.0003	0.87858		7.0004	0.872702		7.0004	0.877704		7.0004	0.871999		7.0004	0.876838		7.0003	0.866815		7.0003	0.875917		7.0004	0.856045
7.0504	0.8761		7.0504	0.878096		7.0504	0.877945		7.0503	0.876121		7.0504	0.87597		7.0504	0.87481		7.0504	0.87593		7.0503	0.873803		7.0503	0.877464		7.0504	0.874118		7.0504	0.875454		7.0504	0.869892		7.0504	0.878483		7.0503	0.865853		7.0503	0.878987		7.0504	0.856689
7.1004	0.877915		7.1004	0.875971		7.1004	0.876243		7.1003	0.877495		7.1004	0.878767		7.1004	0.875693		7.1004	0.876513		7.1003	0.87605		7.1003	0.87885		7.1004	0.872248		7.1004	0.876554		7.1004	0.86783		7.1004	0.876045		7.1003	0.864425		7.1003	0.876136		7.1004	0.856595
7.1504	0.879273		7.1504	0.874896		7.1504	0.878554		7.1504	0.876147		7.1504	0.87529		7.1504	0.873161		7.1504	0.872964		7.1503	0.874622		7.1503	0.878521		7.1504	0.873157		7.1504	0.875548		7.1504	0.866966		7.1504	0.878572		7.1503	0.863583		7.1503	0.877558		7.1504	0.854998
7.2004	0.8766		7.2004	0.874736		7.2004	0.875674		7.2004	0.875841		7.2004	0.877762		7.2004	0.873813		7.2004	0.874913		7.2003	0.873383		7.2003	0.874642		7.2004	0.873491		7.2004	0.875439		7.2004	0.870492		7.2004	0.876554		7.2003	0.865233		7.2003	0.877264		7.2004	0.854773
7.2504	0.878363		7.2504	0.876573		7.2504	0.877688		7.2504	0.875458		7.2504	0.876034		7.2504	0.876031		7.2504	0.873239		7.2503	0.873064		7.2503	0.872213		7.2504	0.870225		7.2504	0.874432		7.2504	0.8671		7.2504	0.876377		7.2503	0.860447		7.2503	0.874276		7.2504	0.85426
7.3004	0.874642		7.3004	0.873909		7.3004	0.876887		7.3004	0.874547		7.3004	0.87648		7.3004	0.872008		7.3004	0.873088		7.3003	0.872754		7.3004	0.877527		7.3004	0.872097		7.3004	0.875518		7.3004	0.868448		7.3004	0.874973		7.3003	0.864216		7.3003	0.876776		7.3004	0.855313
7.3504	0.875649		7.3504	0.873038		7.3504	0.873911		7.3504	0.873362		7.3504	0.877713		7.3504	0.873492		7.3504	0.875573		7.3503	0.869808		7.3504	0.874355		7.3504	0.869061		7.3504	0.877269		7.3504	0.867017		7.3504	0.876342		7.3503	0.865404		7.3504	0.875281		7.3504	0.856918
7.4004	0.87723		7.4004	0.874777		7.4004	0.875854		7.4004	0.874474		7.4004	0.874727		7.4004	0.873574		7.4004	0.877166		7.4004	0.872946		7.4004	0.874099		7.4004	0.870077		7.4004	0.872993		7.4004	0.86552		7.4004	0.87482		7.4004	0.8644		7.4004	0.872751		7.4004	0.853214
7.4504	0.876417		7.4504	0.875314		7.4504	0.8765		7.4504	0.874603		7.4504	0.879373		7.4504	0.871137		7.4504	0.874912		7.4504	0.871302		7.4504	0.876625		7.4504	0.870996		7.4504	0.875755		7.4504	0.867031		7.4504	0.874765		7.4504	0.861038		7.4504	0.873372		7.4504	0.85429
7.5004	0.874468		7.5004	0.875526		7.5004	0.8734		7.5004	0.872544		7.5004	0.875976		7.5004	0.871619		7.5004	0.873565		7.5004	0.875055		7.5004	0.872212		7.5004	0.871138		7.5004	0.875272		7.5004	0.865346		7.5004	0.874739		7.5004	0.86172		7.5004	0.875713		7.5004	0.856195
7.5504	0.874749		7.5504	0.877537		7.5504	0.871972		7.5504	0.872312		7.5504	0.873326		7.5504	0.872742		7.5504	0.87022		7.5504	0.871626		7.5504	0.873724		7.5504	0.870333		7.5504	0.876493		7.5504	0.864529		7.5504	0.874859		7.5504	0.862703		7.5504	0.875501		7.5504	0.855127
7.6004	0.874063		7.6004	0.872393		7.6004	0.87581		7.6004	0.874834		7.6004	0.875864		7.6004	0.873213		7.6004	0.876163		7.6004	0.874115		7.6004	0.874485		7.6004	0.86953		7.6004	0.875352		7.6004	0.866306		7.6004	0.873893		7.6004	0.860938		7.6004	0.875342		7.6004	0.851864
7.6504	0.87266		7.6504	0.872441		7.6505	0.873866		7.6504	0.873042		7.6504	0.875773		7.6504	0.871713		7.6504	0.874958		7.6504	0.871217		7.6504	0.87433		7.6504	0.871556		7.6504	0.873602		7.6504	0.865559		7.6504	0.874649		7.6504	0.861947		7.6504	0.876137		7.6504	0.852263
7.7004	0.875785		7.7005	0.874268		7.7005	0.873153		7.7004	0.873623		7.7004	0.873789		7.7004	0.869513		7.7004	0.870786		7.7004	0.870485		7.7004	0.872918		7.7004	0.867934		7.7004	0.870817		7.7004	0.867422		7.7004	0.873289		7.7004	0.861675		7.7004	0.874745		7.7004	0.850227
7.7504	0.876311		7.7505	0.871201		7.7505	0.87587		7.7504	0.872877		7.7504	0.874292		7.7504	0.872519		7.7504	0.8742		7.7504	0.875434		7.7504	0.872986		7.7504	0.869377		7.7504	0.871003		7.7504	0.866381		7.7504	0.874371		7.7504	0.85897		7.7504	0.873064		7.7504	0.853476
7.8004	0.875015		7.8005	0.873196		7.8005	0.872562		7.8004	0.872321		7.8004	0.875357		7.8004	0.872041		7.8004	0.868826		7.8004	0.868011		7.8004	0.870635		7.8004	0.87012		7.8004	0.872113		7.8004	0.864492		7.8004	0.872814		7.8004	0.858616		7.8004	0.874696		7.8004	0.852383
7.8504	0.871491		7.8505	0.873936		7.8505	0.872433		7.8504	0.873842		7.8504	0.872415		7.8504	0.868847		7.8504	0.874917		7.8504	0.869874		7.8504	0.873698		7.8504	0.86884		7.8504	0.870562		7.8504	0.864965		7.8505	0.876633		7.8504	0.859356		7.8504	0.874829		7.8504	0.849746
7.9004	0.872156		7.9005	0.871809		7.9005	0.871342		7.9004	0.870907		7.9004	0.872614		7.9004	0.869874		7.9004	0.874348		7.9004	0.872423		7.9004	0.872889		7.9004	0.866556		7.9004	0.871286		7.9004	0.867476		7.9005	0.872387		7.9004	0.859553		7.9004	0.874049		7.9004	0.850574
7.9504	0.871464		7.9505	0.87553		7.9505	0.873942		7.9504	0.872248		7.9504	0.871019		7.9504	0.8716		7.9504	0.873742		7.9504	0.869446		7.9504	0.87168		7.9504	0.870574		7.9504	0.871344		7.9505	0.860771		7.9505	0.872731		7.9504	0.858094		7.9504	0.87398		7.9504	0.851827
8.0004	0.873167		8.0005	0.870401		8.0005	0.870248		8.0004	0.870704		8.0004	0.871374		8.0004	0.870252		8.0004	0.872068		8.0004	0.868991		8.0004	0.870371		8.0004	0.867331		8.0004	0.871467		8.0005	0.862767		8.0005	0.873817		8.0004	0.859248		8.0004	0.871717		8.0004	0.851042
8.0504	0.875592		8.0505	0.872895		8.0505	0.873398		8.0504	0.874995		8.0504	0.873404		8.0504	0.870633		8.0504	0.872275		8.0504	0.869038		8.0504	0.871635		8.0504	0.868536		8.0504	0.872331		8.0505	0.866318		8.0505	0.873217		8.0504	0.856265		8.0504	0.872675		8.0504	0.850721
8.1004	0.872409		8.1005	0.872178		8.1005	0.87032		8.1004	0.871758		8.1004	0.873821		8.1004	0.870011		8.1005	0.870938		8.1004	0.871728		8.1004	0.86986		8.1004	0.867258		8.1004	0.871578		8.1005	0.860755		8.1005	0.870781		8.1004	0.858458		8.1004	0.873694		8.1004	0.851252
8.1504	0.873928		8.1505	0.871966		8.1505	0.874045		8.1504	0.874092		8.1504	0.871171		8.1504	0.870229		8.1505	0.870606		8.1504	0.870461		8.1504	0.871056		8.1504	0.868314		8.1504	0.870974		8.1505	0.8633		8.1505	0.870068		8.1504	0.860133		8.1504	0.873667		8.1504	0.852163
8.2004	0.872788		8.2005	0.873861		8.2005	0.874458		8.2004	0.870979		8.2004	0.871507		8.2005	0.872173		8.2005	0.873667		8.2004	0.870988		8.2004	0.870669		8.2004	0.865021		8.2004	0.871157		8.2005	0.862535		8.2005	0.871228		8.2004	0.860751		8.2004	0.871607		8.2004	0.850051
8.2504	0.872887		8.2505	0.875152		8.2505	0.869967		8.2504	0.872344		8.2504	0.871436		8.2505	0.867323		8.2505	0.869274		8.2504	0.867122		8.2504	0.868464		8.2504	0.86357		8.2504	0.868284		8.2505	0.862008		8.2505	0.87082		8.2504	0.855481		8.2504	0.874921		8.2504	0.849959
8.3004	0.871764		8.3005	0.871404		8.3005	0.870538		8.3004	0.868159		8.3004	0.87134		8.3005	0.869497		8.3005	0.868547		8.3004	0.868725		8.3004	0.870223		8.3004	0.866986		8.3004	0.871903		8.3005	0.86298		8.3005	0.869195		8.3004	0.856523		8.3004	0.870373		8.3004	0.849701
8.3504	0.869639		8.3505	0.87203		8.3505	0.86775		8.3504	0.869763		8.3504	0.872744		8.3505	0.868389		8.3505	0.869448		8.3504	0.869305		8.3504	0.872192		8.3504	0.867506		8.3504	0.870934		8.3505	0.861858		8.3505	0.874689		8.3504	0.856979		8.3504	0.870741		8.3504	0.846849
8.4005	0.872865		8.4005	0.872394		8.4005	0.870183		8.4004	0.871909		8.4004	0.867792		8.4005	0.869024		8.4005	0.869312		8.4004	0.86796		8.4004	0.87167		8.4004	0.865801		8.4004	0.869616		8.4005	0.863531		8.4005	0.871413		8.4004	0.857614		8.4004	0.869803		8.4004	0.848188
8.4505	0.872012		8.4505	0.870439		8.4505	0.869167		8.4504	0.871187		8.4504	0.87062		8.4505	0.86898		8.4505	0.868318		8.4504	0.868453		8.4504	0.870965		8.4504	0.863818		8.4504	0.868986		8.4505	0.86366		8.4505	0.870134		8.4504	0.858559		8.4504	0.870065		8.4504	0.84672
8.5005	0.873067		8.5005	0.870967		8.5005	0.867753		8.5004	0.86984		8.5004	0.868439		8.5005	0.868972		8.5005	0.869635		8.5004	0.86597		8.5004	0.870985		8.5005	0.865858		8.5004	0.870351		8.5005	0.86126		8.5005	0.87063		8.5004	0.855537		8.5004	0.87041		8.5005	0.848223
8.5505	0.871395		8.5505	0.870722		8.5505	0.867924		8.5504	0.869424		8.5504	0.869005		8.5505	0.865054		8.5505	0.86898		8.5504	0.868989		8.5504	0.866156		8.5505	0.864578		8.5504	0.865735		8.5505	0.859661		8.5505	0.871336		8.5504	0.857875		8.5504	0.869191		8.5505	0.846602
8.6005	0.874174		8.6005	0.870386		8.6005	0.871089		8.6004	0.869204		8.6004	0.869977		8.6005	0.87052		8.6005	0.86759		8.6004	0.866202		8.6004	0.870178		8.6005	0.865538		8.6004	0.867945		8.6005	0.861084		8.6005	0.870627		8.6004	0.855834		8.6004	0.869796		8.6005	0.849023
8.6505	0.873566		8.6505	0.870764		8.6505	0.871387		8.6504	0.870402		8.6504	0.869519		8.6505	0.865776		8.6505	0.866996		8.6504	0.865929		8.6504	0.870073		8.6505	0.862482		8.6505	0.869436		8.6505	0.859309		8.6505	0.869858		8.6504	0.853839		8.6504	0.868055		8.6505	0.847963
8.7005	0.869047		8.7005	0.869929		8.7005	0.870701		8.7004	0.86894		8.7004	0.869873		8.7005	0.867583		8.7005	0.869017		8.7004	0.866759		8.7004	0.86862		8.7005	0.863962		8.7005	0.870868		8.7005	0.862816		8.7005	0.870397		8.7004	0.855243		8.7004	0.870133		8.7005	0.849255
8.7505	0.867736		8.7505	0.870046		8.7505	0.867276		8.7504	0.865915		8.7504	0.866481		8.7505	0.866623		8.7505	0.865645		8.7504	0.867308		8.7504	0.86856		8.7505	0.867545		8.7505	0.866094		8.7505	0.860135		8.7505	0.868386		8.7504	0.854876		8.7504	0.870145		8.7505	0.84777
8.8005	0.868484		8.8005	0.870527		8.8005	0.869058		8.8004	0.871341		8.8004	0.866522		8.8005	0.868763		8.8005	0.8668		8.8004	0.867733		8.8004	0.86799		8.8005	0.864695		8.8005	0.870281		8.8005	0.860632		8.8005	0.870686		8.8004	0.855279		8.8004	0.86948		8.8005	0.845436
8.8505	0.870041		8.8505	0.86901		8.8505	0.869565		8.8504	0.867388		8.8504	0.867921		8.8505	0.864497		8.8505	0.870107		8.8504	0.868906		8.8504	0.867418		8.8505	0.865801		8.8505	0.869157		8.8505	0.860928		8.8505	0.868019		8.8504	0.857773		8.8504	0.870711		8.8505	0.846773
8.9005	0.871497		8.9005	0.869043		8.9005	0.867991		8.9004	0.867754		8.9005	0.868581		8.9005	0.865722		8.9005	0.869582		8.9004	0.868106		8.9004	0.866011		8.9005	0.863486		8.9005	0.867796		8.9005	0.860113		8.9005	0.867821		8.9004	0.856624		8.9004	0.869868		8.9005	0.848338
8.9505	0.86986		8.9505	0.867839		8.9505	0.867345		8.9505	0.86986		8.9505	0.868436		8.9505	0.86652		8.9505	0.867954		8.9504	0.866876		8.9504	0.866092		8.9505	0.866687		8.9505	0.866961		8.9505	0.859828		8.9505	0.867323		8.9504	0.854745		8.9504	0.865002		8.9505	0.847519
9.0005	0.867551		9.0005	0.869632		9.0005	0.866827		9.0005	0.869737		9.0005	0.871258		9.0005	0.865586		9.0005	0.866314		9.0004	0.867149		9.0004	0.870181		9.0005	0.86497		9.0005	0.86671		9.0005	0.859194		9.0005	0.869532		9.0004	0.852149		9.0004	0.865957		9.0005	0.846098
9.0505	0.867724		9.0505	0.867807		9.0505	0.868402		9.0505	0.866682		9.0505	0.870268		9.0505	0.866396		9.0505	0.866861		9.0504	0.865834		9.0504	0.866715		9.0505	0.862358		9.0505	0.867924		9.0505	0.860645		9.0505	0.869928		9.0504	0.853701		9.0504	0.867569		9.0505	0.84916
9.1005	0.871918		9.1005	0.866888		9.1005	0.871383		9.1005	0.865263		9.1005	0.867544		9.1005	0.866262		9.1005	0.86539		9.1004	0.86612		9.1004	0.863528		9.1005	0.862463		9.1005	0.867481		9.1005	0.859071		9.1005	0.86807		9.1004	0.856215		9.1004	0.86699		9.1005	0.84636
9.1505	0.867741		9.1505	0.868064		9.1505	0.869399		9.1505	0.865013		9.1505	0.868856		9.1505	0.867599		9.1505	0.865071		9.1504	0.866587		9.1505	0.867392		9.1505	0.863688		9.1505	0.868605		9.1505	0.860964		9.1505	0.869072		9.1504	0.853533		9.1505	0.867822		9.1505	0.84438
9.2005	0.868836		9.2005	0.867727		9.2005	0.868925		9.2005	0.866574		9.2005	0.869811		9.2005	0.867024		9.2005	0.867107		9.2005	0.864821		9.2005	0.868414		9.2005	0.861757		9.2005	0.866785		9.2005	0.858463		9.2005	0.86882		9.2005	0.852943		9.2005	0.869465		9.2005	0.844948
9.2505	0.868661		9.2505	0.867425		9.2505	0.868233		9.2505	0.866813		9.2505	0.868456		9.2505	0.865244		9.2505	0.867552		9.2505	0.865037		9.2505	0.867692		9.2505	0.86418		9.2505	0.866551		9.2505	0.859317		9.2505	0.868184		9.2505	0.856442		9.2505	0.868261		9.2505	0.84658
9.3005	0.868667		9.3005	0.86664		9.3005	0.864082		9.3005	0.865299		9.3005	0.868676		9.3005	0.865249		9.3005	0.866141		9.3005	0.866029		9.3005	0.865482		9.3005	0.859809		9.3005	0.867662		9.3005	0.858912		9.3005	0.86639		9.3005	0.851263		9.3005	0.866777		9.3005	0.846233
9.3505	0.867871		9.3505	0.868534		9.3505	0.867261		9.3505	0.865517		9.3505	0.867771		9.3505	0.86643		9.3505	0.867883		9.3505	0.865844		9.3505	0.866985		9.3505	0.860063		9.3505	0.868079		9.3505	0.856808		9.3505	0.867736		9.3505	0.852719		9.3505	0.871241		9.3505	0.845472
9.4005	0.867587		9.4005	0.866246		9.4005	0.864369		9.4005	0.868536		9.4005	0.866359		9.4005	0.864648		9.4005	0.865609		9.4005	0.86366		9.4005	0.865454		9.4005	0.864227		9.4005	0.866009		9.4005	0.855535		9.4005	0.867477		9.4005	0.855501		9.4005	0.870957		9.4005	0.844965
9.4505	0.869214		9.4505	0.865696		9.4506	0.865589		9.4505	0.866363		9.4505	0.871333		9.4505	0.861467		9.4505	0.866932		9.4505	0.865568		9.4505	0.864996		9.4505	0.861994		9.4505	0.865205		9.4505	0.858809		9.4505	0.867793		9.4505	0.85471		9.4505	0.867837		9.4505	0.843697
9.5005	0.865611		9.5005	0.867566		9.5006	0.865241		9.5005	0.868013		9.5005	0.868376		9.5005	0.865781		9.5005	0.86542		9.5005	0.864947		9.5005	0.86623		9.5005	0.861806		9.5005	0.863965		9.5005	0.856785		9.5005	0.866737		9.5005	0.852747		9.5005	0.864474		9.5005	0.84435
9.5505	0.867089		9.5506	0.866868		9.5506	0.868819		9.5505	0.865154		9.5505	0.86667		9.5505	0.864523		9.5505	0.865376		9.5505	0.862343		9.5505	0.866283		9.5505	0.861546		9.5505	0.86356		9.5505	0.859986		9.5505	0.867551		9.5505	0.850962		9.5505	0.864521		9.5505	0.84398
9.6005	0.868223		9.6006	0.866947		9.6006	0.865072		9.6005	0.868263		9.6005	0.865819		9.6005	0.860849		9.6005	0.864879		9.6005	0.863906		9.6005	0.867263		9.6005	0.863683		9.6005	0.866128		9.6005	0.858115		9.6005	0.865947		9.6005	0.851977		9.6005	0.865109		9.6005	0.843349
9.6505	0.866405		9.6506	0.865117		9.6506	0.865682		9.6505	0.865487		9.6505	0.869162		9.6505	0.862872		9.6505	0.866222		9.6505	0.864141		9.6505	0.867225		9.6505	0.862204		9.6505	0.866031		9.6505	0.855899		9.6506	0.865937		9.6505	0.851783		9.6505	0.865637		9.6505	0.843324
9.7005	0.869241		9.7006	0.864854		9.7006	0.866757		9.7005	0.865997		9.7005	0.862076		9.7005	0.864401		9.7005	0.865503		9.7005	0.865237		9.7005	0.866208		9.7005	0.860084		9.7005	0.865127		9.7005	0.8575		9.7006	0.868248		9.7005	0.851032		9.7005	0.863939		9.7005	0.844717
9.7505	0.86622		9.7506	0.864104		9.7506	0.866643		9.7505	0.867211		9.7505	0.866064		9.7505	0.862968		9.7505	0.864356		9.7505	0.861457		9.7505	0.86478		9.7505	0.859402		9.7505	0.866138		9.7505	0.857477		9.7506	0.864932		9.7505	0.852734		9.7505	0.867746		9.7505	0.846886
9.8005	0.867726		9.8006	0.863872		9.8006	0.865702		9.8005	0.864474		9.8005	0.866396		9.8005	0.861276		9.8005	0.86692		9.8005	0.861135		9.8005	0.864393		9.8005	0.860973		9.8005	0.865927		9.8006	0.856933		9.8006	0.865692		9.8005	0.851524		9.8005	0.863442		9.8005	0.842366
9.8505	0.867421		9.8506	0.865051		9.8506	0.865055		9.8505	0.861939		9.8505	0.864868		9.8505	0.86209		9.8505	0.863671		9.8505	0.862807		9.8505	0.865955		9.8505	0.860243		9.8505	0.867136		9.8506	0.855667		9.8506	0.864365		9.8505	0.85311		9.8505	0.867789		9.8505	0.844228
9.9005	0.867294		9.9006	0.865036		9.9006	0.866089		9.9005	0.864482		9.9005	0.865201		9.9005	0.863056		9.9006	0.864359		9.9005	0.863658		9.9005	0.86488		9.9005	0.861084		9.9005	0.866661		9.9006	0.855716		9.9006	0.865294		9.9005	0.850623		9.9005	0.8644		9.9005	0.842949
9.9505	0.86367		9.9506	0.86634		9.9506	0.866887		9.9505	0.866321		9.9505	0.866306		9.9505	0.864395		9.9506	0.866797		9.9505	0.864291		9.9505	0.864337		9.9505	0.860131		9.9505	0.863846		9.9506	0.85726		9.9506	0.864909		9.9505	0.85154		9.9505	0.86525		9.9505	0.840778
10.0005	0.864568		10.0006	0.863543		10.0006	0.864273		10.0005	0.864624		10.0005	0.863704		10.0006	0.860658		10.0006	0.863676		10.0005	0.861325		10.0005	0.864299		10.0005	0.859944		10.0005	0.863718		10.0006	0.854522		10.0006	0.865397		10.0005	0.850308		10.0005	0.865213		10.0005	0.844671
10.0505	0.864977		10.0506	0.865552		10.0506	0.865642		10.0505	0.864153		10.0505	0.865788		10.0506	0.862804		10.0506	0.866659		10.0505	0.863592		10.0505	0.865881		10.0505	0.859285		10.0505	0.862608		10.0506	0.855535		10.0506	0.867591		10.0505	0.850966		10.0505	0.865438		10.0505	0.842401
10.1005	0.863896		10.1006	0.863545		10.1006	0.865339		10.1005	0.863914		10.1005	0.865166		10.1006	0.861359		10.1006	0.863358		10.1005	0.861628		10.1005	0.864066		10.1005	0.858486		10.1005	0.86526		10.1006	0.856441		10.1006	0.866655		10.1005	0.84884		10.1005	0.866511		10.1005	0.840564
10.1505	0.864046		10.1506	0.864886		10.1506	0.861314		10.1505	0.864622		10.1505	0.864857		10.1506	0.865571		10.1506	0.865645		10.1505	0.863111		10.1505	0.864659		10.1505	0.860007		10.1505	0.864645		10.1506	0.855859		10.1506	0.864956		10.1505	0.850857		10.1505	0.864548		10.1505	0.841006
10.2005	0.86566		10.2006	0.864593		10.2006	0.862228		10.2005	0.864136		10.2005	0.864299		10.2006	0.861985		10.2006	0.860922		10.2005	0.863815		10.2005	0.864232		10.2005	0.859407		10.2005	0.86438		10.2006	0.852122		10.2006	0.865622		10.2005	0.849659		10.2005	0.862924		10.2005	0.840616
10.2506	0.863697		10.2506	0.862105		10.2506	0.864683		10.2505	0.863182		10.2505	0.863873		10.2506	0.862586		10.2506	0.865034		10.2505	0.861827		10.2505	0.866243		10.2505	0.858214		10.2505	0.859085		10.2506	0.855449		10.2506	0.865627		10.2505	0.84914		10.2505	0.865879		10.2505	0.839522
10.3006	0.863284		10.3006	0.861829		10.3006	0.863392		10.3005	0.863942		10.3005	0.8658		10.3006	0.862348		10.3006	0.861632		10.3005	0.861259		10.3005	0.864291		10.3006	0.85975		10.3005	0.859959		10.3006	0.855164		10.3006	0.865918		10.3005	0.852135		10.3005	0.865629		10.3006	0.842545
10.3506	0.863842		10.3506	0.867281		10.3506	0.865311		10.3505	0.866877		10.3505	0.861937		10.3506	0.860934		10.3506	0.864725		10.3505	0.862051		10.3505	0.863765		10.3506	0.857845		10.3505	0.862762		10.3506	0.857883		10.3506	0.865127		10.3505	0.850541		10.3505	0.863401		10.3506	0.838554
10.4006	0.86488		10.4006	0.864102		10.4006	0.86441		10.4005	0.863482		10.4005	0.864166		10.4006	0.863225		10.4006	0.863416		10.4005	0.860876		10.4005	0.864045		10.4006	0.860447		10.4005	0.861663		10.4006	0.855949		10.4006	0.86186		10.4005	0.847582		10.4005	0.864942		10.4006	0.839633
10.4506	0.864787		10.4506	0.862548		10.4506	0.861143		10.4505	0.86513		10.4505	0.862361		10.4506	0.859434		10.4506	0.861845		10.4505	0.85889		10.4505	0.863143		10.4506	0.857777		10.4506	0.861732		10.4506	0.853873		10.4506	0.86312		10.4505	0.8487		10.4505	0.862165		10.4506	0.842837
10.5006	0.864269		10.5006	0.861882		10.5006	0.86332		10.5005	0.861475		10.5005	0.86244		10.5006	0.860695		10.5006	0.861516		10.5005	0.860553		10.5005	0.863857		10.5006	0.857748		10.5006	0.862939		10.5006	0.856707		10.5006	0.865084		10.5005	0.847244		10.5005	0.861252		10.5006	0.842671
10.5506	0.865198		10.5506	0.862537		10.5506	0.865146		10.5505	0.863885		10.5505	0.859831		10.5506	0.860611		10.5506	0.862105		10.5505	0.862798		10.5505	0.863896		10.5506	0.857727		10.5506	0.863149		10.5506	0.855961		10.5506	0.862559		10.5505	0.851379		10.5505	0.86306		10.5506	0.842157
10.6006	0.866075		10.6006	0.862016		10.6006	0.864248		10.6005	0.861287		10.6005	0.863918		10.6006	0.86311		10.6006	0.863865		10.6005	0.860351		10.6005	0.863651		10.6006	0.857486		10.6006	0.862032		10.6006	0.854686		10.6006	0.862615		10.6005	0.847346		10.6005	0.8636		10.6006	0.839787
10.6506	0.863406		10.6506	0.864101		10.6506	0.862882		10.6505	0.862115		10.6505	0.867437		10.6506	0.863346		10.6506	0.862836		10.6505	0.858706		10.6505	0.862921		10.6506	0.856406		10.6506	0.86364		10.6506	0.855358		10.6506	0.862598		10.6505	0.849793		10.6505	0.864082		10.6506	0.840387
10.7006	0.85963		10.7006	0.864785		10.7006	0.863954		10.7005	0.8666		10.7006	0.864136		10.7006	0.86028		10.7006	0.860979		10.7005	0.862924		10.7005	0.861475		10.7006	0.857274		10.7006	0.858862		10.7006	0.852367		10.7006	0.863925		10.7005	0.848824		10.7005	0.86437		10.7006	0.840547
10.7506	0.862626		10.7506	0.864119		10.7506	0.865932		10.7505	0.859941		10.7506	0.865228		10.7506	0.861892		10.7506	0.861272		10.7505	0.857722		10.7505	0.860417		10.7506	0.856842		10.7506	0.861363		10.7506	0.855476		10.7506	0.864467		10.7505	0.847531		10.7505	0.861521		10.7506	0.841731
10.8006	0.864165		10.8006	0.862209		10.8006	0.864071		10.8006	0.862523		10.8006	0.86365		10.8006	0.858858		10.8006	0.860031		10.8005	0.860101		10.8005	0.860651		10.8006	0.856702		10.8006	0.861768		10.8006	0.85581		10.8006	0.865607		10.8005	0.847035		10.8005	0.860395		10.8006	0.841955
10.8506	0.862941		10.8506	0.862528		10.8506	0.86331		10.8506	0.863979		10.8506	0.865293		10.8506	0.860548		10.8506	0.864494		10.8505	0.860393		10.8505	0.86026		10.8506	0.860059		10.8506	0.860787		10.8506	0.856147		10.8506	0.862697		10.8505	0.848231		10.8505	0.860703		10.8506	0.84304
10.9006	0.863415		10.9006	0.86236		10.9006	0.861152		10.9006	0.862297		10.9006	0.862339		10.9006	0.858441		10.9006	0.861203		10.9005	0.858262		10.9005	0.860687		10.9006	0.857828		10.9006	0.860056		10.9006	0.853674		10.9006	0.863503		10.9005	0.848597		10.9005	0.862472		10.9006	0.839872
10.9506	0.864459		10.9506	0.861547		10.9506	0.864301		10.9506	0.862298		10.9506	0.860915		10.9506	0.85763		10.9506	0.862293		10.9505	0.859088		10.9506	0.858822		10.9506	0.85489		10.9506	0.860096		10.9506	0.852595		10.9506	0.863337		10.9505	0.849026		10.9505	0.863541		10.9506	0.840365
11.0006	0.862491		11.0006	0.861194		11.0006	0.86302		11.0006	0.861597		11.0006	0.860313		11.0006	0.859911		11.0006	0.862556		11.0005	0.858657		11.0006	0.860699		11.0006	0.857111		11.0006	0.860351		11.0006	0.852404		11.0006	0.860686		11.0005	0.847425		11.0006	0.862847		11.0006	0.839645
11.0506	0.860159		11.0506	0.862635		11.0506	0.85963		11.0506	0.86073		11.0506	0.864783		11.0506	0.861142		11.0506	0.863005		11.0506	0.860043		11.0506	0.860622		11.0506	0.85825		11.0506	0.856783		11.0506	0.851665		11.0506	0.860984		11.0506	0.846882		11.0506	0.859341		11.0506	0.838053
11.1006	0.860617		11.1006	0.862709		11.1006	0.85994		11.1006	0.860825		11.1006	0.859965		11.1006	0.861895		11.1006	0.862344		11.1006	0.859324		11.1006	0.85927		11.1006	0.856625		11.1006	0.859003		11.1006	0.855945		11.1006	0.860517		11.1006	0.845715		11.1006	0.862131		11.1006	0.841164
11.1506	0.86135		11.1506	0.862963		11.1506	0.862835		11.1506	0.860313		11.1506	0.859556		11.1506	0.860703		11.1506	0.857701		11.1506	0.86004		11.1506	0.861397		11.1506	0.854785		11.1506	0.86125		11.1506	0.852208		11.1506	0.862654		11.1506	0.847495		11.1506	0.861845		11.1506	0.83888
11.2006	0.863792		11.2006	0.858557		11.2006	0.861994		11.2006	0.860498		11.2006	0.861599		11.2006	0.860204		11.2006	0.86298		11.2006	0.858086		11.2006	0.857575		11.2006	0.854672		11.2006	0.860136		11.2006	0.851329		11.2006	0.860993		11.2006	0.846312		11.2006	0.863783		11.2006	0.839371
11.2506	0.862995		11.2506	0.86248		11.2506	0.861636		11.2506	0.862311		11.2506	0.86326		11.2506	0.860368		11.2506	0.861543		11.2506	0.859166		11.2506	0.861007		11.2506	0.854475		11.2506	0.861765		11.2506	0.853106		11.2506	0.860776		11.2506	0.849852		11.2506	0.863566		11.2506	0.837256
11.3006	0.865168		11.3006	0.862681		11.3007	0.861644		11.3006	0.861206		11.3006	0.863323		11.3006	0.858391		11.3006	0.860636		11.3006	0.856932		11.3006	0.861556		11.3006	0.854277		11.3006	0.86216		11.3006	0.852116		11.3006	0.863902		11.3006	0.847353		11.3006	0.862167		11.3006	0.837569
11.3506	0.858757		11.3507	0.86435		11.3507	0.860074		11.3506	0.860881		11.3506	0.860365		11.3506	0.856525		11.3506	0.85929		11.3506	0.858245		11.3506	0.861837		11.3506	0.85768		11.3506	0.85719		11.3506	0.852334		11.3506	0.86165		11.3506	0.84751		11.3506	0.861845		11.3506	0.838434
11.4006	0.862779		11.4007	0.863116		11.4007	0.86121		11.4006	0.85922		11.4006	0.863942		11.4006	0.85978		11.4006	0.861411		11.4006	0.858221		11.4006	0.860906		11.4006	0.858746		11.4006	0.863225		11.4006	0.850898		11.4006	0.860657		11.4006	0.843951		11.4006	0.86007		11.4006	0.838945
11.4506	0.860062		11.4507	0.859615		11.4507	0.857553		11.4506	0.860342		11.4506	0.860683		11.4506	0.860559		11.4506	0.858796		11.4506	0.860159		11.4506	0.86098		11.4506	0.855461		11.4506	0.860293		11.4506	0.851373		11.4506	0.861341		11.4506	0.845698		11.4506	0.861664		11.4506	0.838986
11.5006	0.861943		11.5007	0.862245		11.5007	0.862973		11.5006	0.858925		11.5006	0.863501		11.5006	0.857981		11.5006	0.859676		11.5006	0.85728		11.5006	0.860203		11.5006	0.85556		11.5006	0.859424		11.5006	0.852365		11.5007	0.860654		11.5006	0.846069		11.5006	0.861833		11.5006	0.837212
11.5506	0.861042		11.5507	0.861166		11.5507	0.861217		11.5506	0.858547		11.5506	0.860526		11.5506	0.857424		11.5506	0.859769		11.5506	0.856636		11.5506	0.858939		11.5506	0.853876		11.5506	0.858887		11.5506	0.849126		11.5507	0.861352		11.5506	0.844773		11.5506	0.861983		11.5506	0.837733
11.6006	0.861146		11.6007	0.864427		11.6007	0.861597		11.6006	0.860172		11.6006	0.860803		11.6006	0.858834		11.6006	0.860536		11.6006	0.861075		11.6006	0.85928		11.6006	0.854172		11.6006	0.86053		11.6007	0.854553		11.6007	0.85947		11.6006	0.843647		11.6006	0.859765		11.6006	0.837533
11.6506	0.863303		11.6507	0.86066		11.6507	0.862598		11.6506	0.856425		11.6506	0.861937		11.6506	0.85976		11.6506	0.860662		11.6506	0.857957		11.6506	0.859176		11.6506	0.852175		11.6506	0.861837		11.6507	0.849791		11.6507	0.861092		11.6506	0.84432		11.6506	0.861952		11.6506	0.836056
11.7006	0.862059		11.7007	0.861412		11.7007	0.859032		11.7006	0.859261		11.7006	0.85919		11.7006	0.858392		11.7006	0.861319		11.7006	0.8583		11.7006	0.856239		11.7006	0.855041		11.7006	0.860821		11.7007	0.852509		11.7007	0.86144		11.7006	0.84902		11.7006	0.860567		11.7006	0.837922
11.7506	0.861536		11.7507	0.86078		11.7507	0.859304		11.7506	0.857388		11.7506	0.860848		11.7506	0.859356		11.7507	0.860242		11.7506	0.86014		11.7506	0.85861		11.7506	0.854441		11.7506	0.860182		11.7507	0.852505		11.7507	0.860426		11.7506	0.846668		11.7506	0.858755		11.7506	0.837366
11.8006	0.860354		11.8007	0.860537		11.8007	0.860352		11.8006	0.858688		11.8006	0.859474		11.8006	0.858133		11.8007	0.862413		11.8006	0.856615		11.8006	0.858445		11.8006	0.852029		11.8006	0.862665		11.8007	0.850267		11.8007	0.859558		11.8006	0.84507		11.8006	0.859125		11.8006	0.837862
11.8506	0.862677		11.8507	0.860156		11.8507	0.860244		11.8506	0.860343		11.8506	0.86021		11.8507	0.856615		11.8507	0.857681		11.8506	0.859593		11.8506	0.859158		11.8506	0.855597		11.8506	0.858132		11.8507	0.852211		11.8507	0.859697		11.8506	0.842728		11.8506	0.861491		11.8506	0.836754
11.9006	0.865067		11.9007	0.857532		11.9007	0.86011		11.9006	0.860089		11.9006	0.861477		11.9007	0.857751		11.9007	0.857329		11.9006	0.85873		11.9006	0.859908		11.9006	0.854515		11.9006	0.859369		11.9007	0.849981		11.9007	0.860804		11.9006	0.844458		11.9006	0.859346		11.9006	0.83692
11.9506	0.863075		11.9507	0.858049		11.9507	0.858815		11.9506	0.859432		11.9506	0.858532		11.9507	0.858562		11.9507	0.860949		11.9506	0.857643		11.9506	0.859996		11.9506	0.853451		11.9506	0.862867		11.9507	0.851858		11.9507	0.860269		11.9506	0.845852		11.9506	0.860466		11.9506	0.83638
12.0006	0.859696		12.0007	0.859932		12.0007	0.857734		12.0006	0.859321		12.0006	0.857172		12.0007	0.856852		12.0007	0.85737		12.0006	0.853572		12.0006	0.857999		12.0006	0.856982		12.0006	0.858121		12.0007	0.850064		12.0007	0.859182		12.0006	0.84498		12.0006	0.862238		12.0006	0.838178
12.0507	0.863139		12.0507	0.85823		12.0507	0.860499		12.0506	0.861797		12.0506	0.859384		12.0507	0.85448		12.0507	0.85799		12.0506	0.857309		12.0506	0.857662		12.0506	0.853542		12.0506	0.85871		12.0507	0.848931		12.0507	0.858013		12.0506	0.846879		12.0506	0.860295		12.0506	0.837695
12.1007	0.861459		12.1007	0.860859		12.1007	0.860653		12.1006	0.860461		12.1006	0.861657		12.1007	0.85916		12.1007	0.859774		12.1006	0.854804		12.1006	0.85991		12.1007	0.853469		12.1006	0.855955		12.1007	0.85066		12.1007	0.857916		12.1006	0.846212		12.1006	0.858261		12.1006	0.835013
12.1507	0.860623		12.1507	0.860993		12.1507	0.857976		12.1506	0.856442		12.1506	0.862973		12.1507	0.855423		12.1507	0.859109		12.1506	0.854914		12.1506	0.859433		12.1507	0.851715		12.1506	0.856632		12.1507	0.851383		12.1507	0.856985		12.1506	0.84502		12.1506	0.857343		12.1507	0.834964
12.2007	0.861232		12.2007	0.860465		12.2007	0.86184		12.2006	0.856445		12.2006	0.855872		12.2007	0.855286		12.2007	0.856607		12.2006	0.855453		12.2006	0.856935		12.2007	0.852109		12.2006	0.856868		12.2007	0.84773		12.2007	0.859975		12.2006	0.842545		12.2006	0.85996		12.2007	0.836595
12.2507	0.861591		12.2507	0.860254		12.2507	0.861834		12.2506	0.859907		12.2506	0.859478		12.2507	0.858488		12.2507	0.856924		12.2506	0.855608		12.2506	0.857414		12.2507	0.854182		12.2506	0.859631		12.2507	0.850519		12.2507	0.8604		12.2506	0.84752		12.2506	0.857209		12.2507	0.83725
12.3007	0.860137		12.3007	0.858324		12.3007	0.85845		12.3006	0.859411		12.3006	0.858743		12.3007	0.857342		12.3007	0.859735		12.3006	0.856678		12.3006	0.858795		12.3007	0.855734		12.3007	0.855195		12.3007	0.849108		12.3007	0.859283		12.3006	0.843852		12.3006	0.858207		12.3007	0.835124
12.3507	0.861234		12.3507	0.85889		12.3507	0.859963		12.3506	0.859283		12.3506	0.858238		12.3507	0.857703		12.3507	0.858715		12.3506	0.857375		12.3506	0.857894		12.3507	0.852483		12.3507	0.856498		12.3507	0.848908		12.3507	0.859406		12.3506	0.843197		12.3506	0.855271		12.3507	0.83641
12.4007	0.859601		12.4007	0.860344		12.4007	0.858317		12.4006	0.8601		12.4006	0.856005		12.4007	0.856829		12.4007	0.857177		12.4006	0.854555		12.4006	0.857204		12.4007	0.853625		12.4007	0.858581		12.4007	0.850586		12.4007	0.857485		12.4006	0.843206		12.4006	0.861282		12.4007	0.834651
12.4507	0.860943		12.4507	0.860488		12.4507	0.859181		12.4506	0.86004		12.4506	0.856817		12.4507	0.857497		12.4507	0.857771		12.4506	0.855097		12.4506	0.857041		12.4507	0.854134		12.4507	0.859098		12.4507	0.85208		12.4507	0.858815		12.4506	0.845756		12.4506	0.856596		12.4507	0.835733
12.5007	0.858644		12.5007	0.85777		12.5007	0.856121		12.5006	0.856617		12.5006	0.859257		12.5007	0.858328		12.5007	0.861989		12.5006	0.856422		12.5006	0.860231		12.5007	0.851874		12.5007	0.858424		12.5007	0.847056		12.5007	0.859702		12.5006	0.844392		12.5006	0.857726		12.5007	0.836584
12.5507	0.857084		12.5507	0.860165		12.5507	0.859797		12.5507	0.855651		12.5507	0.857906		12.5507	0.853294		12.5507	0.856085		12.5506	0.85583		12.5506	0.858935		12.5507	0.855175		12.5507	0.858166		12.5507	0.847998		12.5507	0.861177		12.5506	0.843497		12.5506	0.859769		12.5507	0.83446
12.6007	0.86083		12.6007	0.860012		12.6007	0.858141		12.6007	0.85782		12.6007	0.858336		12.6007	0.859436		12.6007	0.856049		12.6006	0.856365		12.6006	0.858341		12.6007	0.85504		12.6007	0.858838		12.6007	0.846925		12.6007	0.858478		12.6006	0.841705		12.6006	0.8583		12.6007	0.837122
12.6507	0.857006		12.6507	0.858591		12.6507	0.857675		12.6507	0.858767		12.6507	0.855652		12.6507	0.856358		12.6507	0.858311		12.6506	0.853137		12.6506	0.859103		12.6507	0.852326		12.6507	0.856416		12.6507	0.847222		12.6507	0.859484		12.6506	0.841698		12.6506	0.857455		12.6507	0.833454
12.7007	0.856899		12.7007	0.860756		12.7007	0.856433		12.7007	0.859539		12.7007	0.858596		12.7007	0.856518		12.7007	0.857092		12.7006	0.854451		12.7006	0.857107		12.7007	0.853953		12.7007	0.85928		12.7007	0.847343		12.7007	0.857813		12.7006	0.844065		12.7006	0.858471		12.7007	0.837303
12.7507	0.85705		12.7507	0.858057		12.7507	0.861709		12.7507	0.857805		12.7507	0.856113		12.7507	0.855298		12.7507	0.855914		12.7506	0.852949		12.7506	0.859149		12.7507	0.850317		12.7507	0.856623		12.7507	0.847059		12.7507	0.856828		12.7506	0.841017		12.7506	0.855829		12.7507	0.834935
12.8007	0.858879		12.8007	0.858403		12.8007	0.857269		12.8007	0.860377		12.8007	0.860146		12.8007	0.855577		12.8007	0.85758		12.8006	0.854861		12.8007	0.856417		12.8007	0.84959		12.8007	0.861665		12.8007	0.846991		12.8007	0.857298		12.8006	0.843093		12.8007	0.854624		12.8007	0.834853
12.8507	0.859892		12.8507	0.858072		12.8507	0.858173		12.8507	0.857964		12.8507	0.858413		12.8507	0.855113		12.8507	0.858235		12.8507	0.854586		12.8507	0.855948		12.8507	0.85283		12.8507	0.857411		12.8507	0.850828		12.8507	0.858018		12.8507	0.846057		12.8507	0.858056		12.8507	0.834735
12.9007	0.857716		12.9007	0.858412		12.9007	0.858617		12.9007	0.858506		12.9007	0.85645		12.9007	0.856417		12.9007	0.855947		12.9007	0.854901		12.9007	0.856314		12.9007	0.853279		12.9007	0.856152		12.9007	0.84619		12.9007	0.85934		12.9007	0.843102		12.9007	0.858804		12.9007	0.83459
12.9507	0.858926		12.9507	0.85785		12.9507	0.855524		12.9507	0.857624		12.9507	0.859854		12.9507	0.854743		12.9507	0.857802		12.9507	0.854292		12.9507	0.856433		12.9507	0.850786		12.9507	0.855925		12.9507	0.846842		12.9507	0.855524		12.9507	0.843416		12.9507	0.857937		12.9507	0.83351
13.0007	0.854616		13.0007	0.857946		13.0007	0.857863		13.0007	0.85753		13.0007	0.85964		13.0007	0.854235		13.0007	0.856275		13.0007	0.855978		13.0007	0.857745		13.0007	0.853151		13.0007	0.854405		13.0007	0.847577		13.0007	0.856706		13.0007	0.841874		13.0007	0.856633		13.0007	0.835506
13.0507	0.856592		13.0507	0.859026		13.0507	0.858187		13.0507	0.856031		13.0507	0.856962		13.0507	0.85559		13.0507	0.857325		13.0507	0.853031		13.0507	0.85715		13.0507	0.85169		13.0507	0.856391		13.0507	0.846011		13.0507	0.858526		13.0507	0.842055		13.0507	0.858054		13.0507	0.834035
13.1007	0.861775		13.1007	0.856088		13.1008	0.858583		13.1007	0.85663		13.1007	0.860089		13.1007	0.859312		13.1007	0.856869		13.1007	0.853968		13.1007	0.854528		13.1007	0.853268		13.1007	0.853218		13.1007	0.848713		13.1007	0.854967		13.1007	0.839199		13.1007	0.857718		13.1007	0.834097
13.1507	0.861826		13.1507	0.858194		13.1508	0.85669		13.1507	0.856822		13.1507	0.858105		13.1507	0.853906		13.1507	0.855906		13.1507	0.852428		13.1507	0.857144		13.1507	0.851932		13.1507	0.855149		13.1507	0.847736		13.1507	0.859521		13.1507	0.842945		13.1507	0.856663		13.1507	0.832888
13.2007	0.85877		13.2008	0.857217		13.2008	0.857904		13.2007	0.858596		13.2007	0.856639		13.2007	0.855276		13.2007	0.855421		13.2007	0.85295		13.2007	0.855039		13.2007	0.853258		13.2007	0.85492		13.2007	0.848421		13.2007	0.858715		13.2007	0.843054		13.2007	0.857236		13.2007	0.833415
13.2507	0.858197		13.2508	0.857339		13.2508	0.857883		13.2507	0.857905		13.2507	0.854491		13.2507	0.853749		13.2507	0.856205		13.2507	0.852427		13.2507	0.858955		13.2507	0.852929		13.2507	0.856969		13.2507	0.846087		13.2507	0.858512		13.2507	0.843837		13.2507	0.857399		13.2507	0.835439
13.3007	0.859381		13.3008	0.85758		13.3008	0.854792		13.3007	0.857232		13.3007	0.856708		13.3007	0.85222		13.3007	0.855461		13.3007	0.856251		13.3007	0.857206		13.3007	0.851716		13.3007	0.856517		13.3007	0.846425		13.3008	0.856041		13.3007	0.839893		13.3007	0.856563		13.3007	0.836291
13.3507	0.858281		13.3508	0.856025		13.3508	0.858771		13.3507	0.855834		13.3507	0.85725		13.3507	0.854869		13.3507	0.855908		13.3507	0.852907		13.3507	0.854129		13.3507	0.852015		13.3507	0.855192		13.3507	0.848182		13.3508	0.856648		13.3507	0.84332		13.3507	0.855687		13.3507	0.833123
13.4007	0.858486		13.4008	0.858477		13.4008	0.856375		13.4007	0.85519		13.4007	0.858866		13.4007	0.855165		13.4007	0.855665		13.4007	0.852983		13.4007	0.854632		13.4007	0.850264		13.4007	0.8539		13.4007	0.845712		13.4008	0.857265		13.4007	0.843188		13.4007	0.854879		13.4007	0.830778
13.4507	0.857567		13.4508	0.857272		13.4508	0.857228		13.4507	0.856697		13.4507	0.859656		13.4507	0.853631		13.4507	0.856301		13.4507	0.853677		13.4507	0.858555		13.4507	0.852158		13.4507	0.856209		13.4508	0.848611		13.4508	0.854004		13.4507	0.842039		13.4507	0.858574		13.4507	0.834688
13.5007	0.857692		13.5008	0.85788		13.5008	0.858415		13.5007	0.85433		13.5007	0.854839		13.5007	0.852871		13.5007	0.858933		13.5007	0.852081		13.5007	0.855545		13.5007	0.851586		13.5007	0.856909		13.5008	0.850211		13.5008	0.85727		13.5007	0.839703		13.5007	0.858373		13.5007	0.833077
13.5507	0.858514		13.5508	0.857801		13.5508	0.856192		13.5507	0.856146		13.5507	0.857487		13.5507	0.852897		13.5508	0.85353		13.5507	0.853895		13.5507	0.855294		13.5507	0.849606		13.5507	0.855499		13.5508	0.844539		13.5508	0.856412		13.5507	0.841176		13.5507	0.857294		13.5507	0.83448
13.6007	0.857718		13.6008	0.857316		13.6008	0.853992		13.6007	0.854602		13.6007	0.857787		13.6007	0.853172		13.6008	0.854893		13.6007	0.853434		13.6007	0.856021		13.6007	0.849998		13.6007	0.85566		13.6008	0.84902		13.6008	0.858081		13.6007	0.840077		13.6007	0.856038		13.6007	0.832525
13.6507	0.855795		13.6508	0.856999		13.6508	0.856002		13.6507	0.857705		13.6507	0.857046		13.6508	0.85399		13.6508	0.85829		13.6507	0.853181		13.6507	0.856401		13.6507	0.850731		13.6507	0.855245		13.6508	0.84669		13.6508	0.85611		13.6507	0.839512		13.6507	0.854523		13.6507	0.83191
13.7007	0.857978		13.7008	0.855605		13.7008	0.855393		13.7007	0.856906		13.7007	0.856019		13.7008	0.853392		13.7008	0.853533		13.7007	0.851909		13.7007	0.853717		13.7007	0.850301		13.7007	0.856295		13.7008	0.846069		13.7008	0.854968		13.7007	0.843269		13.7007	0.858575		13.7007	0.832776
13.7507	0.856833		13.7508	0.856592		13.7508	0.857218		13.7507	0.855737		13.7507	0.852656		13.7508	0.853409		13.7508	0.857244		13.7507	0.854614		13.7507	0.856157		13.7507	0.851845		13.7507	0.852657		13.7508	0.848788		13.7508	0.855283		13.7507	0.839696		13.7507	0.85399		13.7507	0.834092
13.8007	0.85708		13.8008	0.857278		13.8008	0.857449		13.8007	0.857048		13.8007	0.856022		13.8008	0.854562		13.8008	0.853067		13.8007	0.852687		13.8007	0.856605		13.8007	0.84881		13.8007	0.852717		13.8008	0.846131		13.8008	0.856138		13.8007	0.841576		13.8007	0.856622		13.8007	0.830666
13.8507	0.86081		13.8508	0.856354		13.8508	0.858205		13.8507	0.856261		13.8507	0.858831		13.8508	0.854889		13.8508	0.85499		13.8507	0.851777		13.8507	0.85514		13.8507	0.850286		13.8507	0.855722		13.8508	0.846875		13.8508	0.856461		13.8507	0.839407		13.8507	0.855588		13.8507	0.83254
13.9008	0.857525		13.9008	0.855898		13.9008	0.856402		13.9007	0.855784		13.9007	0.856608		13.9008	0.855265		13.9008	0.856011		13.9007	0.85392		13.9007	0.85413		13.9007	0.849364		13.9007	0.854326		13.9008	0.845011		13.9008	0.858047		13.9007	0.84231		13.9007	0.853219		13.9007	0.832357
13.9508	0.858921		13.9508	0.857127		13.9508	0.859253		13.9507	0.85625		13.9507	0.855756		13.9508	0.852135		13.9508	0.8559		13.9507	0.85176		13.9507	0.854786		13.9508	0.851582		13.9507	0.855579		13.9508	0.847132		13.9508	0.857443		13.9507	0.841983		13.9507	0.855038		13.9508	0.831735
14.0008	0.858162		14.0008	0.855871		14.0008	0.858071		14.0007	0.856678		14.0007	0.856407		14.0008	0.854667		14.0008	0.857538		14.0007	0.848444		14.0007	0.855626		14.0008	0.850218		14.0007	0.852972		14.0008	0.845473		14.0008	0.856152		14.0007	0.840659		14.0007	0.855176		14.0008	0.832016
14.0508	0.859258		14.0508	0.857898		14.0508	0.855537		14.0507	0.856773		14.0507	0.856236		14.0508	0.850825		14.0508	0.853667		14.0507	0.853244		14.0507	0.852722		14.0508	0.851126		14.0507	0.854884		14.0508	0.84693		14.0508	0.856422		14.0507	0.83953		14.0507	0.855529		14.0508	0.832685
14.1008	0.853687		14.1008	0.855069		14.1008	0.854596		14.1007	0.853754		14.1007	0.854937		14.1008	0.850467		14.1008	0.856043		14.1007	0.852556		14.1007	0.857449		14.1008	0.850642		14.1008	0.855543		14.1008	0.845369		14.1008	0.854309		14.1007	0.84067		14.1007	0.856187		14.1008	0.832242
14.1508	0.857358		14.1508	0.85506		14.1508	0.854409		14.1507	0.854207		14.1507	0.85458		14.1508	0.853611		14.1508	0.858163		14.1507	0.852114		14.1507	0.856174		14.1508	0.848927		14.1508	0.855009		14.1508	0.847657		14.1508	0.855034		14.1507	0.840244		14.1507	0.853948		14.1508	0.831998
14.2008	0.857129		14.2008	0.852839		14.2008	0.854188		14.2007	0.854274		14.2007	0.855854		14.2008	0.852423		14.2008	0.853291		14.2007	0.851575		14.2007	0.853206		14.2008	0.847683		14.2008	0.852928		14.2008	0.845731		14.2008	0.858005		14.2007	0.840889		14.2007	0.854736		14.2008	0.831945
14.2508	0.855354		14.2508	0.853776		14.2508	0.85543		14.2507	0.855354		14.2507	0.857713		14.2508	0.853179		14.2508	0.853934		14.2507	0.852771		14.2507	0.857391		14.2508	0.84926		14.2508	0.857399		14.2508	0.845242		14.2508	0.857492		14.2507	0.839507		14.2507	0.854514		14.2508	0.831447
14.3008	0.856003		14.3008	0.856635		14.3008	0.857247		14.3007	0.853164		14.3007	0.854251		14.3008	0.85337		14.3008	0.854926		14.3007	0.851312		14.3007	0.854053		14.3008	0.847648		14.3008	0.852523		14.3008	0.846255		14.3008	0.856764		14.3007	0.839657		14.3007	0.855192		14.3008	0.83149
14.3508	0.855599		14.3508	0.856209		14.3508	0.854504		14.3507	0.856117		14.3508	0.855795		14.3508	0.854907		14.3508	0.854503		14.3507	0.85253		14.3507	0.852775		14.3508	0.848949		14.3508	0.853363		14.3508	0.845193		14.3508	0.855725		14.3507	0.841196		14.3507	0.858872		14.3508	0.82944
14.4008	0.854613		14.4008	0.853295		14.4008	0.855784		14.4007	0.853771		14.4008	0.855656		14.4008	0.854401		14.4008	0.854376		14.4007	0.852845		14.4007	0.856339		14.4008	0.84992		14.4008	0.855133		14.4008	0.848032		14.4008	0.853449		14.4007	0.841465		14.4007	0.855139		14.4008	0.832711
14.4508	0.855736		14.4508	0.854104		14.4508	0.855859		14.4508	0.855081		14.4508	0.853909		14.4508	0.855951		14.4508	0.854235		14.4507	0.852778		14.4507	0.852052		14.4508	0.850195		14.4508	0.856267		14.4508	0.844601		14.4508	0.85525		14.4507	0.839973		14.4507	0.855327		14.4508	0.831952
14.5008	0.855194		14.5008	0.857388		14.5008	0.853294		14.5008	0.853356		14.5008	0.855547		14.5008	0.852771		14.5008	0.855827		14.5007	0.851308		14.5007	0.853177		14.5008	0.847429		14.5008	0.851675		14.5008	0.845794		14.5008	0.857723		14.5007	0.839777		14.5007	0.854512		14.5008	0.831149
14.5508	0.857435		14.5508	0.855225		14.5508	0.85622		14.5508	0.855323		14.5508	0.854975		14.5508	0.853361		14.5508	0.853675		14.5507	0.852783		14.5507	0.856375		14.5508	0.849776		14.5508	0.854012		14.5508	0.845025		14.5508	0.855336		14.5507	0.840528		14.5507	0.856038		14.5508	0.831489
14.6008	0.856054		14.6008	0.855019		14.6008	0.856286		14.6008	0.85365		14.6008	0.854588		14.6008	0.852106		14.6008	0.853557		14.6007	0.851957		14.6008	0.854078		14.6008	0.84944		14.6008	0.853168		14.6008	0.842067		14.6008	0.852868		14.6007	0.837627		14.6007	0.853804		14.6008	0.830764
14.6508	0.855619		14.6508	0.857917		14.6508	0.85495		14.6508	0.855043		14.6508	0.853494		14.6508	0.853169		14.6508	0.853639		14.6507	0.85156		14.6508	0.853897		14.6508	0.848937		14.6508	0.854487		14.6508	0.843719		14.6508	0.857408		14.6507	0.841522		14.6508	0.856056		14.6508	0.831634
14.7008	0.855268		14.7008	0.853712		14.7008	0.852529		14.7008	0.855592		14.7008	0.858528		14.7008	0.851514		14.7008	0.855102		14.7008	0.852272		14.7008	0.852829		14.7008	0.849949		14.7008	0.851908		14.7008	0.844404		14.7008	0.857602		14.7008	0.838396		14.7008	0.856373		14.7008	0.830815
14.7508	0.85466		14.7508	0.851704		14.7508	0.855773		14.7508	0.852993		14.7508	0.854422		14.7508	0.851575		14.7508	0.853261		14.7508	0.849791		14.7508	0.852965		14.7508	0.848066		14.7508	0.854709		14.7508	0.842186		14.7508	0.853307		14.7508	0.839685		14.7508	0.855001		14.7508	0.829727
14.8008	0.854829		14.8008	0.854726		14.8008	0.856339		14.8008	0.854235		14.8008	0.855043		14.8008	0.851559		14.8008	0.852501		14.8008	0.851109		14.8008	0.854669		14.8008	0.850061		14.8008	0.850732		14.8008	0.84547		14.8008	0.855681		14.8008	0.84027		14.8008	0.853609		14.8008	0.828509
14.8508	0.856466		14.8508	0.856		14.8508	0.855198		14.8508	0.853119		14.8508	0.853586		14.8508	0.852484		14.8508	0.853103		14.8508	0.849385		14.8508	0.853159		14.8508	0.849985		14.8508	0.852483		14.8508	0.84415		14.8508	0.852153		14.8508	0.83699		14.8508	0.854763		14.8508	0.829412
14.9008	0.853847		14.9008	0.853621		14.9008	0.854146		14.9008	0.85425		14.9008	0.85402		14.9008	0.853375		14.9008	0.851457		14.9008	0.850141		14.9008	0.856243		14.9008	0.847189		14.9008	0.853644		14.9008	0.844883		14.9008	0.854856		14.9008	0.839925		14.9008	0.85353		14.9008	0.831667
14.9508	0.85475		14.9508	0.855039		14.9509	0.854654		14.9508	0.852975		14.9508	0.854125		14.9508	0.85052		14.9508	0.853488		14.9508	0.850276		14.9508	0.853534		14.9508	0.846548		14.9508	0.852224		14.9508	0.843338		14.9508	0.851612		14.9508	0.838596		14.9508	0.853803		14.9508	0.830604
15.0008	0.857529		15.0009	0.858542		15.0009	0.856493		15.0008	0.854711		15.0008	0.857321		15.0008	0.853313		15.0008	0.854852		15.0008	0.852162		15.0008	0.85294		15.0008	0.846593		15.0008	0.853855		15.0008	0.842096		15.0008	0.855229		15.0008	0.838126		15.0008	0.853274		15.0008	0.830404
15.0508	0.853368		15.0509	0.856043		15.0509	0.854066		15.0508	0.852701		15.0508	0.851403		15.0508	0.851206		15.0508	0.854555		15.0508	0.849331		15.0508	0.85539		15.0508	0.847192		15.0508	0.855183		15.0508	0.84471		15.0508	0.855202		15.0508	0.836959		15.0508	0.855964		15.0508	0.829821
15.1008	0.856483		15.1009	0.853843		15.1009	0.856012		15.1008	0.853035		15.1008	0.853641		15.1008	0.852027		15.1008	0.853745		15.1008	0.850604		15.1008	0.853415		15.1008	0.848114		15.1008	0.851147		15.1008	0.846457		15.1008	0.854628		15.1008	0.837933		15.1008	0.851149		15.1008	0.829789
15.1508	0.857144		15.1509	0.854807		15.1509	0.854376		15.1508	0.852681		15.1508	0.855364		15.1508	0.850518		15.1508	0.851541		15.1508	0.850469		15.1508	0.852228		15.1508	0.847585		15.1508	0.850993		15.1508	0.844191		15.1509	0.854326		15.1508	0.838562		15.1508	0.856774		15.1508	0.830444
15.2008	0.854046		15.2009	0.855401		15.2009	0.855103		15.2008	0.856083		15.2008	0.854621		15.2008	0.851462		15.2008	0.852317		15.2008	0.852268		15.2008	0.853643		15.2008	0.849236		15.2008	0.85225		15.2008	0.842842		15.2009	0.850447		15.2008	0.839364		15.2008	0.852837		15.2008	0.830943
15.2508	0.855541		15.2509	0.852056		15.2509	0.852308		15.2508	0.852367		15.2508	0.854234		15.2508	0.850005		15.2508	0.853939		15.2508	0.849807		15.2508	0.855414		15.2508	0.846735		15.2508	0.855986		15.2509	0.842366		15.2509	0.854092		15.2508	0.838631		15.2508	0.854942		15.2508	0.828236
15.3008	0.856488		15.3009	0.85288		15.3009	0.853007		15.3008	0.854017		15.3008	0.855489		15.3008	0.84979		15.3008	0.851055		15.3008	0.851929		15.3008	0.851383		15.3008	0.84678		15.3008	0.852386		15.3009	0.843817		15.3009	0.854947		15.3008	0.838706		15.3008	0.851068		15.3008	0.82871
15.3508	0.855703		15.3509	0.854564		15.3509	0.852853		15.3508	0.854164		15.3508	0.854204		15.3508	0.855206		15.3508	0.849944		15.3508	0.850921		15.3508	0.852529		15.3508	0.847476		15.3508	0.852628		15.3509	0.842609		15.3509	0.854634		15.3508	0.836046		15.3508	0.853121		15.3508	0.828763
15.4008	0.857302		15.4009	0.853339		15.4009	0.853708		15.4008	0.855441		15.4008	0.852622		15.4008	0.850335		15.4009	0.853582		15.4008	0.850715		15.4008	0.851933		15.4008	0.844487		15.4008	0.853786		15.4009	0.844557		15.4009	0.856047		15.4008	0.837565		15.4008	0.853256		15.4008	0.828533
15.4508	0.855214		15.4509	0.855265		15.4509	0.855151		15.4508	0.8515		15.4508	0.851785		15.4508	0.85093		15.4509	0.853459		15.4508	0.849686		15.4508	0.851551		15.4508	0.847215		15.4508	0.853231		15.4509	0.843294		15.4509	0.85191		15.4508	0.839482		15.4508	0.853438		15.4508	0.829101
15.5008	0.854288		15.5009	0.851593		15.5009	0.854897		15.5008	0.852637		15.5008	0.855115		15.5009	0.852791		15.5009	0.853321		15.5008	0.851795		15.5008	0.851607		15.5008	0.849781		15.5008	0.85534		15.5009	0.840711		15.5009	0.85496		15.5008	0.840304		15.5008	0.851012		15.5008	0.828969
15.5508	0.854826		15.5509	0.852245		15.5509	0.855875		15.5508	0.85055		15.5508	0.855417		15.5509	0.852		15.5509	0.85244		15.5508	0.84449		15.5508	0.852945		15.5508	0.849626		15.5508	0.852002		15.5509	0.843372		15.5509	0.851224		15.5508	0.836205		15.5508	0.854529		15.5508	0.828334
15.6008	0.856804		15.6009	0.851613		15.6009	0.852189		15.6008	0.84818		15.6008	0.852926		15.6009	0.851499		15.6009	0.855845		15.6008	0.845587		15.6008	0.851631		15.6008	0.84657		15.6008	0.850801		15.6009	0.842255		15.6009	0.852877		15.6008	0.839803		15.6008	0.851252		15.6008	0.827375
15.6508	0.855197		15.6509	0.853049		15.6509	0.856801		15.6508	0.851137		15.6508	0.853891		15.6509	0.849376		15.6509	0.851542		15.6508	0.847556		15.6508	0.853356		15.6508	0.850102		15.6508	0.85133		15.6509	0.843799		15.6509	0.851089		15.6508	0.836528		15.6508	0.853121		15.6508	0.827265
15.7009	0.855041		15.7009	0.853876		15.7009	0.853323		15.7008	0.854085		15.7008	0.851309		15.7009	0.853335		15.7009	0.853836		15.7008	0.850518		15.7008	0.85097		15.7008	0.847607		15.7008	0.852466		15.7009	0.84356		15.7009	0.854268		15.7008	0.835869		15.7008	0.853836		15.7008	0.828501
15.7509	0.854833		15.7509	0.852967		15.7509	0.852798		15.7508	0.853554		15.7508	0.858305		15.7509	0.853559		15.7509	0.852502		15.7508	0.852875		15.7508	0.851242		15.7509	0.846982		15.7508	0.851238		15.7509	0.842428		15.7509	0.854841		15.7508	0.835274		15.7508	0.854215		15.7508	0.830096
15.8009	0.85585		15.8009	0.853759		15.8009	0.854645		15.8008	0.857598		15.8008	0.854452		15.8009	0.849274		15.8009	0.851915		15.8008	0.852036		15.8008	0.852038		15.8009	0.847085		15.8008	0.850922		15.8009	0.843269		15.8009	0.853212		15.8008	0.836263		15.8008	0.851404		15.8009	0.827695
15.8509	0.852935		15.8509	0.854239		15.8509	0.854216		15.8508	0.852031		15.8508	0.855808		15.8509	0.849126		15.8509	0.852294		15.8508	0.849897		15.8508	0.855743		15.8509	0.847097		15.8508	0.850322		15.8509	0.844334		15.8509	0.851103		15.8508	0.837975		15.8508	0.854116		15.8509	0.828637
15.9009	0.85515		15.9009	0.853886		15.9009	0.853449		15.9008	0.855094		15.9008	0.855609		15.9009	0.850541		15.9009	0.853946		15.9008	0.848185		15.9008	0.853275		15.9009	0.84669		15.9008	0.853661		15.9009	0.842147		15.9009	0.852471		15.9008	0.837442		15.9008	0.852513		15.9009	0.830091
15.9509	0.853309		15.9509	0.853918		15.9509	0.855795		15.9508	0.850067		15.9508	0.853813		15.9509	0.850019		15.9509	0.853657		15.9508	0.850006		15.9508	0.854415		15.9509	0.849332		15.9509	0.853535		15.9509	0.844129		15.9509	0.853842		15.9508	0.83827		15.9508	0.851667		15.9509	0.82666
16.0009	0.856429		16.0009	0.854836		16.0009	0.853487		16.0008	0.85513		16.0008	0.853748		16.0009	0.848573		16.0009	0.853419		16.0008	0.849016		16.0008	0.851738		16.0009	0.84604		16.0009	0.851403		16.0009	0.843023		16.0009	0.84981		16.0008	0.838402		16.0008	0.853912		16.0009	0.827578
16.0509	0.856179		16.0509	0.853759		16.0509	0.85279		16.0508	0.851977		16.0508	0.852134		16.0509	0.850985		16.0509	0.849193		16.0508	0.850219		16.0508	0.8529		16.0509	0.845426		16.0509	0.852811		16.0509	0.844852		16.0509	0.853056		16.0508	0.836772		16.0508	0.852932		16.0509	0.830118
16.1009	0.852559		16.1009	0.851961		16.1009	0.853043		16.1008	0.853353		16.1008	0.853305		16.1009	0.848088		16.1009	0.85501		16.1008	0.848471		16.1008	0.849036		16.1009	0.845848		16.1009	0.853371		16.1009	0.841236		16.1009	0.855029		16.1008	0.837415		16.1008	0.84955		16.1009	0.829445
16.1509	0.854805		16.1509	0.850265		16.1509	0.852083		16.1508	0.850535		16.1508	0.852516		16.1509	0.850568		16.1509	0.849875		16.1508	0.848033		16.1508	0.853984		16.1509	0.847991		16.1509	0.848995		16.1509	0.841416		16.1509	0.852926		16.1508	0.835808		16.1508	0.850696		16.1509	0.829574
16.2009	0.852445		16.2009	0.851836		16.2009	0.85289		16.2008	0.85104		16.2009	0.854373		16.2009	0.851293		16.2009	0.851025		16.2008	0.849475		16.2008	0.853576		16.2009	0.848078		16.2009	0.851628		16.2009	0.843025		16.2009	0.851089		16.2008	0.838882		16.2008	0.851899		16.2009	0.827454
16.2509	0.854466		16.2509	0.851978		16.2509	0.854197		16.2509	0.851269		16.2509	0.851896		16.2509	0.850783		16.2509	0.855654		16.2508	0.847271		16.2508	0.85356		16.2509	0.844956		16.2509	0.854635		16.2509	0.843787		16.2509	0.854821		16.2508	0.83419		16.2508	0.851098		16.2509	0.827835
16.3009	0.854161		16.3009	0.855505		16.3009	0.854737		16.3009	0.851947		16.3009	0.85196		16.3009	0.851164		16.3009	0.852951		16.3008	0.85019		16.3008	0.852928		16.3009	0.848132		16.3009	0.852528		16.3009	0.843262		16.3009	0.851668		16.3008	0.837209		16.3008	0.853338		16.3009	0.828271
16.3509	0.855575		16.3509	0.851214		16.3509	0.852743		16.3509	0.847092		16.3509	0.851142		16.3509	0.851643		16.3509	0.853544		16.3508	0.850768		16.3508	0.854362		16.3509	0.845021		16.3509	0.851675		16.3509	0.842455		16.3509	0.851032		16.3508	0.836315		16.3508	0.850642		16.3509	0.827335
16.4009	0.853115		16.4009	0.852911		16.4009	0.851403		16.4009	0.852082		16.4009	0.852515		16.4009	0.848201		16.4009	0.85244		16.4008	0.849357		16.4008	0.850818		16.4009	0.84921		16.4009	0.851918		16.4009	0.842373		16.4009	0.852926		16.4008	0.835308		16.4008	0.852227		16.4009	0.827654
16.4509	0.856269		16.4509	0.852403		16.4509	0.849093		16.4509	0.852476		16.4509	0.853588		16.4509	0.851609		16.4509	0.852579		16.4508	0.849089		16.4509	0.855166		16.4509	0.846341		16.4509	0.849295		16.4509	0.841064		16.4509	0.849012		16.4508	0.835787		16.4509	0.850566		16.4509	0.828549
16.5009	0.853255		16.5009	0.850987		16.5009	0.853574		16.5009	0.850786		16.5009	0.854221		16.5009	0.851003		16.5009	0.851621		16.5009	0.846388		16.5009	0.851626		16.5009	0.844487		16.5009	0.851866		16.5009	0.84155		16.5009	0.851135		16.5009	0.835673		16.5009	0.852779		16.5009	0.827198
16.5509	0.853243		16.5509	0.852682		16.5509	0.852699		16.5509	0.85239		16.5509	0.853941		16.5509	0.850645		16.5509	0.851415		16.5509	0.848492		16.5509	0.851294		16.5509	0.848535		16.5509	0.850855		16.5509	0.841474		16.5509	0.852824		16.5509	0.835072		16.5509	0.851943		16.5509	0.828323
16.6009	0.853059		16.6009	0.856279		16.6009	0.853071		16.6009	0.850899		16.6009	0.854119		16.6009	0.849913		16.6009	0.849422		16.6009	0.850155		16.6009	0.849414		16.6009	0.846396		16.6009	0.850104		16.6009	0.841889		16.6009	0.854181		16.6009	0.836936		16.6009	0.852954		16.6009	0.826608
16.6509	0.855428		16.6509	0.853241		16.6509	0.849328		16.6509	0.852048		16.6509	0.850164		16.6509	0.850539		16.6509	0.853175		16.6509	0.850504		16.6509	0.852925		16.6509	0.847601		16.6509	0.853105		16.6509	0.840548		16.6509	0.854497		16.6509	0.838428		16.6509	0.851653		16.6509	0.826848
16.7009	0.851663		16.7009	0.853269		16.7009	0.850373		16.7009	0.852463		16.7009	0.850144		16.7009	0.849603		16.7009	0.849315		16.7009	0.851895		16.7009	0.851683		16.7009	0.845196		16.7009	0.853205		16.7009	0.842301		16.7009	0.851128		16.7009	0.832817		16.7009	0.850704		16.7009	0.827322
16.7509	0.853255		16.7509	0.852457		16.751	0.852363		16.7509	0.853249		16.7509	0.854925		16.7509	0.852006		16.7509	0.848855		16.7509	0.849255		16.7509	0.850998		16.7509	0.849934		16.7509	0.849728		16.7509	0.843778		16.7509	0.851832		16.7509	0.836226		16.7509	0.853497		16.7509	0.826238
16.8009	0.854426		16.8009	0.854214		16.801	0.852763		16.8009	0.852043		16.8009	0.85045		16.8009	0.846678		16.8009	0.850899		16.8009	0.84912		16.8009	0.850195		16.8009	0.847093		16.8009	0.848386		16.8009	0.841117		16.8009	0.851014		16.8009	0.836752		16.8009	0.849206		16.8009	0.827017
16.8509	0.850752		16.851	0.855766		16.851	0.851452		16.8509	0.850979		16.8509	0.852325		16.8509	0.850733		16.8509	0.851407		16.8509	0.848352		16.8509	0.851848		16.8509	0.843923		16.8509	0.85113		16.8509	0.841177		16.8509	0.852719		16.8509	0.836525		16.8509	0.854184		16.8509	0.828877
16.9009	0.852392		16.901	0.851504		16.901	0.852499		16.9009	0.853367		16.9009	0.853516		16.9009	0.848102		16.9009	0.85173		16.9009	0.849706		16.9009	0.852439		16.9009	0.842708		16.9009	0.85077		16.9009	0.844669		16.9009	0.849834		16.9009	0.837024		16.9009	0.849357		16.9009	0.826266
16.9509	0.853179		16.951	0.851869		16.951	0.852728		16.9509	0.852216		16.9509	0.849686		16.9509	0.848785		16.9509	0.847473		16.9509	0.844833		16.9509	0.850847		16.9509	0.846931		16.9509	0.852305		16.9509	0.840551		16.951	0.850762		16.9509	0.833057		16.9509	0.852369		16.9509	0.82812
17.0009	0.85091		17.001	0.850985		17.001	0.852136		17.0009	0.85157		17.0009	0.85212		17.0009	0.851426		17.0009	0.848894		17.0009	0.84914		17.0009	0.851015		17.0009	0.845039		17.0009	0.849515		17.0009	0.842862		17.001	0.853854		17.0009	0.837182		17.0009	0.850741		17.0009	0.827996
17.0509	0.855403		17.051	0.850344		17.051	0.851182		17.0509	0.852136		17.0509	0.850732		17.0509	0.851622		17.0509	0.851787		17.0509	0.84698		17.0509	0.852167		17.0509	0.844948		17.0509	0.849062		17.051	0.841186		17.051	0.854063		17.0509	0.837188		17.0509	0.853059		17.0509	0.826693
17.1009	0.854232		17.101	0.852815		17.101	0.852264		17.1009	0.848357		17.1009	0.852956		17.1009	0.852254		17.1009	0.851405		17.1009	0.846886		17.1009	0.852421		17.1009	0.845087		17.1009	0.851057		17.101	0.844135		17.101	0.852966		17.1009	0.834425		17.1009	0.853163		17.1009	0.826438
17.1509	0.848056		17.151	0.852692		17.151	0.85336		17.1509	0.847678		17.1509	0.850578		17.1509	0.850941		17.1509	0.850174		17.1509	0.846336		17.1509	0.849337		17.1509	0.844294		17.1509	0.853658		17.151	0.843194		17.151	0.851771		17.1509	0.835313		17.1509	0.852785		17.1509	0.825809
17.2009	0.853248		17.201	0.852125		17.201	0.851502		17.2009	0.850889		17.2009	0.850314		17.2009	0.849793		17.201	0.851019		17.2009	0.84963		17.2009	0.852765		17.2009	0.842918		17.2009	0.849307		17.201	0.840897		17.201	0.85084		17.2009	0.83372		17.2009	0.851557		17.2009	0.824558
17.2509	0.852986		17.251	0.84921		17.251	0.852336		17.2509	0.850376		17.2509	0.853635		17.2509	0.847413		17.251	0.849734		17.2509	0.849801		17.2509	0.851481		17.2509	0.845986		17.2509	0.851244		17.251	0.841861		17.251	0.852909		17.2509	0.836988		17.2509	0.85333		17.2509	0.827039
17.3009	0.852885		17.301	0.851859		17.301	0.851938		17.3009	0.852467		17.3009	0.852555		17.301	0.851286		17.301	0.851949		17.3009	0.849435		17.3009	0.85091		17.3009	0.846546		17.3009	0.852466		17.301	0.842273		17.301	0.852846		17.3009	0.83591		17.3009	0.851634		17.3009	0.827791
17.3509	0.8529		17.351	0.85231		17.351	0.851945		17.3509	0.850289		17.3509	0.851714		17.351	0.849167		17.351	0.852049		17.3509	0.844579		17.3509	0.851581		17.3509	0.845115		17.3509	0.84979		17.351	0.841826		17.351	0.852705		17.3509	0.834899		17.3509	0.850413		17.3509	0.827269
17.4009	0.852714		17.401	0.848703		17.401	0.852644		17.4009	0.850001		17.4009	0.851524		17.401	0.848766		17.401	0.848097		17.4009	0.848146		17.4009	0.849877		17.4009	0.845811		17.4009	0.849164		17.401	0.841209		17.401	0.851621		17.4009	0.835248		17.4009	0.850565		17.4009	0.826373
17.4509	0.852256		17.451	0.851517		17.451	0.850785		17.4509	0.851707		17.4509	0.851309		17.451	0.84861		17.451	0.85198		17.4509	0.850567		17.4509	0.852462		17.4509	0.843584		17.4509	0.850002		17.451	0.840375		17.451	0.851818		17.4509	0.831681		17.4509	0.851905		17.4509	0.826059
17.5009	0.851811		17.501	0.852141		17.501	0.852142		17.5009	0.851684		17.5009	0.850719		17.501	0.851651		17.501	0.851844		17.5009	0.847382		17.5009	0.853039		17.5009	0.843879		17.5009	0.850542		17.501	0.838071		17.501	0.853859		17.5009	0.836371		17.5009	0.849186		17.5009	0.827251
17.551	0.854292		17.551	0.851572		17.551	0.850817		17.5509	0.850967		17.5509	0.854041		17.551	0.850766		17.551	0.849824		17.5509	0.847242		17.5509	0.848914		17.5509	0.844049		17.5509	0.847878		17.551	0.839846		17.551	0.854413		17.5509	0.835993		17.5509	0.849795		17.5509	0.827708
17.601	0.85407		17.601	0.84878		17.601	0.850043		17.6009	0.848779		17.6009	0.853018		17.601	0.850317		17.601	0.850931		17.6009	0.84795		17.6009	0.851999		17.601	0.845292		17.6009	0.851611		17.601	0.840473		17.601	0.85157		17.6009	0.83426		17.6009	0.853276		17.601	0.826178
17.651	0.85408		17.651	0.852837		17.651	0.852187		17.6509	0.847703		17.6509	0.849971		17.651	0.848308		17.651	0.848178		17.6509	0.844809		17.6509	0.850259		17.651	0.845731		17.6509	0.850866		17.651	0.842087		17.651	0.852605		17.6509	0.834815		17.6509	0.852758		17.651	0.828359
17.701	0.852673		17.701	0.850185		17.701	0.851594		17.7009	0.851605		17.7009	0.851429		17.701	0.848256		17.701	0.850797		17.7009	0.846837		17.7009	0.85085		17.701	0.843527		17.7009	0.850815		17.701	0.84222		17.701	0.853019		17.7009	0.834556		17.7009	0.84951		17.701	0.826706
17.751	0.851888		17.751	0.852078		17.751	0.852334		17.7509	0.84941		17.7509	0.851325		17.751	0.851465		17.751	0.849956		17.7509	0.848223		17.7509	0.853063		17.751	0.84614		17.751	0.84937		17.751	0.841388		17.751	0.851347		17.7509	0.834731		17.7509	0.847397		17.751	0.825905
17.801	0.849625		17.801	0.849387		17.801	0.849493		17.8009	0.850509		17.8009	0.851671		17.801	0.851049		17.801	0.851798		17.8009	0.846369		17.8009	0.852394		17.801	0.842871		17.801	0.851107		17.801	0.83877		17.801	0.854847		17.8009	0.834137		17.8009	0.852985		17.801	0.826139
17.851	0.852446		17.851	0.848605		17.851	0.850427		17.8509	0.848689		17.8509	0.853809		17.851	0.849805		17.851	0.851523		17.8509	0.84814		17.8509	0.851073		17.851	0.846118		17.851	0.848679		17.851	0.842704		17.851	0.851681		17.8509	0.835041		17.8509	0.849361		17.851	0.825917
17.901	0.854168		17.901	0.852828		17.901	0.851744		17.9009	0.851743		17.9009	0.850228		17.901	0.846543		17.901	0.849443		17.9009	0.848525		17.9009	0.851074		17.901	0.845483		17.901	0.84882		17.901	0.841547		17.901	0.851181		17.9009	0.834856		17.9009	0.849761		17.901	0.826821
17.951	0.851983		17.951	0.851522		17.951	0.85163		17.9509	0.850798		17.9509	0.851164		17.951	0.847799		17.951	0.849902		17.9509	0.846907		17.9509	0.850875		17.951	0.846998		17.951	0.851266		17.951	0.842026		17.951	0.852551		17.9509	0.835017		17.9509	0.848546		17.951	0.826409
18.001	0.850974		18.001	0.849526		18.001	0.854266		18.0009	0.850309		18.001	0.849423		18.001	0.851466		18.001	0.849982		18.0009	0.846849		18.0009	0.851119		18.001	0.848936		18.001	0.848382		18.001	0.839689		18.001	0.849073		18.0009	0.834085		18.0009	0.848757		18.001	0.826701
18.051	0.852509		18.051	0.853498		18.051	0.850828		18.051	0.850618		18.051	0.849983		18.051	0.847252		18.051	0.84936		18.0509	0.84693		18.0509	0.847857		18.051	0.845699		18.051	0.851656		18.051	0.84096		18.051	0.851235		18.0509	0.835346		18.0509	0.85128		18.051	0.826418
18.101	0.850131		18.101	0.850463		18.101	0.85312		18.101	0.848182		18.101	0.850641		18.101	0.849288		18.101	0.849856		18.1009	0.848149		18.1009	0.851477		18.101	0.845481		18.101	0.85051		18.101	0.840905		18.101	0.852628		18.1009	0.836162		18.1009	0.850306		18.101	0.825681
18.151	0.851777		18.151	0.851299		18.151	0.850262		18.151	0.851543		18.151	0.85105		18.151	0.851662		18.151	0.847998		18.1509	0.849448		18.1509	0.851196		18.151	0.843945		18.151	0.849569		18.151	0.84111		18.151	0.852671		18.1509	0.835128		18.1509	0.852082		18.151	0.825735
18.201	0.85181		18.201	0.851852		18.201	0.850961		18.201	0.850811		18.201	0.848962		18.201	0.850667		18.201	0.847327		18.2009	0.844884		18.2009	0.848032		18.201	0.844251		18.201	0.849134		18.201	0.841144		18.201	0.850151		18.2009	0.832933		18.2009	0.84976		18.201	0.826502
18.251	0.850218		18.251	0.851512		18.251	0.852827		18.251	0.849526		18.251	0.850211		18.251	0.85213		18.251	0.851308		18.2509	0.847838		18.251	0.850514		18.251	0.846811		18.251	0.851308		18.251	0.839651		18.251	0.851523		18.2509	0.832224		18.2509	0.85238		18.251	0.824755
18.301	0.851141		18.301	0.849793		18.301	0.851509		18.301	0.85037		18.301	0.851453		18.301	0.847439		18.301	0.849476		18.3009	0.845044		18.301	0.851837		18.301	0.847285		18.301	0.851039		18.301	0.838449		18.301	0.8501		18.3009	0.831881		18.301	0.851285		18.301	0.826141
18.351	0.852547		18.351	0.853936		18.351	0.850951		18.351	0.853404		18.351	0.853106		18.351	0.846911		18.351	0.850202		18.351	0.850671		18.351	0.84727		18.351	0.844174		18.351	0.850245		18.351	0.840895		18.351	0.851968		18.351	0.833509		18.351	0.849317		18.351	0.824482
18.401	0.851748		18.401	0.851629		18.401	0.850653		18.401	0.851146		18.401	0.848054		18.401	0.847563		18.401	0.848354		18.401	0.850079		18.401	0.850583		18.401	0.84537		18.401	0.850121		18.401	0.840434		18.401	0.851223		18.401	0.833884		18.401	0.850274		18.401	0.825925
18.451	0.854096		18.451	0.852757		18.451	0.849179		18.451	0.849167		18.451	0.849499		18.451	0.847601		18.451	0.848288		18.451	0.845641		18.451	0.848479		18.451	0.846763		18.451	0.848111		18.451	0.84065		18.451	0.852017		18.451	0.834682		18.451	0.8525		18.451	0.82411
18.501	0.852461		18.501	0.852022		18.501	0.849672		18.501	0.847497		18.501	0.849294		18.501	0.847187		18.501	0.845033		18.501	0.848426		18.501	0.847972		18.501	0.844068		18.501	0.851509		18.501	0.841507		18.501	0.850693		18.501	0.833146		18.501	0.851597		18.501	0.825553
18.551	0.850772		18.551	0.850243		18.551	0.851231		18.551	0.849005		18.551	0.848369		18.551	0.847929		18.551	0.848471		18.551	0.845685		18.551	0.850724		18.551	0.84352		18.551	0.850089		18.551	0.839468		18.551	0.851653		18.551	0.832071		18.551	0.848506		18.551	0.823875
18.601	0.851638		18.601	0.85255		18.6011	0.850338		18.601	0.848168		18.601	0.850541		18.601	0.850623		18.601	0.849502		18.601	0.848171		18.601	0.850939		18.601	0.843796		18.601	0.848967		18.601	0.837703		18.601	0.850492		18.601	0.834447		18.601	0.847918		18.601	0.824975
18.651	0.852372		18.6511	0.850163		18.6511	0.851411		18.651	0.851084		18.651	0.847537		18.651	0.850847		18.651	0.850873		18.651	0.845311		18.651	0.849765		18.651	0.843519		18.651	0.848927		18.651	0.839558		18.651	0.852735		18.651	0.832301		18.651	0.850276		18.651	0.823633
18.701	0.849669		18.7011	0.849965		18.7011	0.851645		18.701	0.849942		18.701	0.852509		18.701	0.846688		18.701	0.849245		18.701	0.848271		18.701	0.850503		18.701	0.844577		18.701	0.847819		18.701	0.841488		18.701	0.850433		18.701	0.832459		18.701	0.848643		18.701	0.826452
18.751	0.850967		18.7511	0.851259		18.7511	0.848554		18.751	0.847136		18.751	0.847865		18.751	0.847834		18.751	0.850817		18.751	0.846887		18.751	0.846601		18.751	0.844001		18.751	0.84753		18.751	0.839348		18.751	0.850308		18.751	0.834477		18.751	0.849075		18.751	0.825346
18.801	0.84851		18.8011	0.851704		18.8011	0.852678		18.801	0.84633		18.801	0.848396		18.801	0.849475		18.801	0.847195		18.801	0.84731		18.801	0.850901		18.801	0.844599		18.801	0.850053		18.801	0.836771		18.8011	0.85119		18.801	0.833294		18.801	0.85134		18.801	0.824019
18.851	0.851057		18.8511	0.849778		18.8511	0.848847		18.851	0.848575		18.851	0.850861		18.851	0.850721		18.851	0.851996		18.851	0.846883		18.851	0.850052		18.851	0.841013		18.851	0.851758		18.851	0.841703		18.8511	0.850594		18.851	0.834664		18.851	0.84977		18.851	0.821694
18.901	0.851172		18.9011	0.851443		18.9011	0.851758		18.901	0.848815		18.901	0.846994		18.901	0.848302		18.901	0.849153		18.901	0.844465		18.901	0.849596		18.901	0.845052		18.901	0.845792		18.9011	0.838676		18.9011	0.851437		18.901	0.833752		18.901	0.847406		18.901	0.82499
18.951	0.852033		18.9511	0.849826		18.9511	0.850053		18.951	0.848746		18.951	0.850715		18.951	0.847399		18.951	0.848925		18.951	0.848665		18.951	0.849204		18.951	0.843347		18.951	0.846605		18.9511	0.839547		18.9511	0.851949		18.951	0.832766		18.951	0.850388		18.951	0.823773
19.001	0.853442		19.0011	0.849177		19.0011	0.849936		19.001	0.850476		19.001	0.850717		19.001	0.847125		19.001	0.850147		19.001	0.846797		19.001	0.849803		19.001	0.843564		19.001	0.847386		19.0011	0.839559		19.0011	0.854479		19.001	0.833017		19.001	0.847939		19.001	0.825013
19.051	0.852968		19.0511	0.852359		19.0511	0.85176		19.051	0.846653		19.051	0.850578		19.051	0.851208		19.0511	0.850151		19.051	0.84666		19.051	0.846454		19.051	0.842316		19.051	0.847066		19.0511	0.83905		19.0511	0.851322		19.051	0.834002		19.051	0.849365		19.051	0.823846
19.101	0.849653		19.1011	0.84581		19.1011	0.850642		19.101	0.846349		19.101	0.850959		19.101	0.846501		19.1011	0.848588		19.101	0.843773		19.101	0.848836		19.101	0.843627		19.101	0.846496		19.1011	0.840234		19.1011	0.847898		19.101	0.834527		19.101	0.850074		19.101	0.826046
19.151	0.852381		19.1511	0.845728		19.1511	0.850395		19.151	0.847685		19.151	0.850399		19.1511	0.845748		19.1511	0.850479		19.151	0.84433		19.151	0.849955		19.151	0.845453		19.151	0.848794		19.1511	0.839208		19.1511	0.849712		19.151	0.832645		19.151	0.850369		19.151	0.825002
19.201	0.850962		19.2011	0.851694		19.2011	0.847368		19.201	0.849326		19.201	0.851488		19.2011	0.848943		19.2011	0.850605		19.201	0.84631		19.201	0.849743		19.201	0.84539		19.201	0.847354		19.2011	0.838448		19.2011	0.850627		19.201	0.832115		19.201	0.850963		19.201	0.825584
19.251	0.85462		19.2511	0.851155		19.2511	0.851316		19.251	0.850081		19.251	0.849812		19.2511	0.849846		19.2511	0.849601		19.251	0.845248		19.251	0.847455		19.251	0.844264		19.251	0.847092		19.2511	0.839135		19.2511	0.850213		19.251	0.835106		19.251	0.850265		19.251	0.827505
19.301	0.850239		19.3011	0.851194		19.3011	0.849595		19.301	0.848775		19.301	0.85022		19.3011	0.848312		19.3011	0.850009		19.301	0.846628		19.301	0.848865		19.301	0.842417		19.301	0.851516		19.3011	0.838503		19.3011	0.851048		19.301	0.833694		19.301	0.853729		19.301	0.824099
19.3511	0.850777		19.3511	0.849456		19.3511	0.851357		19.351	0.849271		19.351	0.848919		19.3511	0.849389		19.3511	0.847951		19.351	0.847322		19.351	0.849853		19.351	0.843006		19.351	0.850212		19.3511	0.840638		19.3511	0.850178		19.351	0.834473		19.351	0.849949		19.351	0.821987
19.4011	0.8496		19.4011	0.848544		19.4011	0.847869		19.401	0.846697		19.401	0.850392		19.4011	0.848588		19.4011	0.849916		19.401	0.844529		19.401	0.849868		19.4011	0.847746		19.401	0.848004		19.4011	0.838079		19.4011	0.849625		19.401	0.83178		19.401	0.847245		19.401	0.8223
19.4511	0.852263		19.4511	0.849364		19.4511	0.848739		19.451	0.849651		19.451	0.849409		19.4511	0.851981		19.4511	0.847905		19.451	0.847242		19.451	0.8496		19.4511	0.839892		19.451	0.849344		19.4511	0.839234		19.4511	0.849457		19.451	0.834684		19.451	0.849325		19.4511	0.823992
19.5011	0.851256		19.5011	0.851851		19.5011	0.851155		19.501	0.847283		19.501	0.847988		19.5011	0.849674		19.5011	0.851039		19.501	0.846244		19.501	0.853062		19.5011	0.843042		19.501	0.851965		19.5011	0.839885		19.5011	0.850264		19.501	0.833996		19.501	0.849872		19.5011	0.823352
19.5511	0.855212		19.5511	0.851782		19.5511	0.847896		19.551	0.847412		19.551	0.85141		19.5511	0.84715		19.5511	0.847802		19.551	0.844682		19.551	0.849926		19.5511	0.845143		19.551	0.848624		19.5511	0.840014		19.5511	0.852482		19.551	0.831398		19.551	0.848875		19.5511	0.825355
19.6011	0.851364		19.6011	0.850812		19.6011	0.851713		19.601	0.8485		19.601	0.849605		19.6011	0.846189		19.6011	0.846114		19.601	0.847103		19.601	0.847749		19.6011	0.844042		19.6011	0.846092		19.6011	0.839852		19.6011	0.849971		19.601	0.835995		19.601	0.845986		19.6011	0.824935
19.6511	0.850161		19.6511	0.851551		19.6511	0.847709		19.651	0.847037		19.651	0.849519		19.6511	0.848828		19.6511	0.849493		19.651	0.847417		19.651	0.848636		19.6511	0.843185		19.6511	0.847428		19.6511	0.841049		19.6511	0.848778		19.651	0.83122		19.651	0.849161		19.6511	0.824117
19.7011	0.851103		19.7011	0.850369		19.7011	0.850153		19.701	0.847241		19.701	0.850869		19.7011	0.848427		19.7011	0.845676		19.701	0.847479		19.701	0.852247		19.7011	0.842913		19.7011	0.848058		19.7011	0.837704		19.7011	0.848741		19.701	0.832162		19.701	0.849074		19.7011	0.824837
19.7511	0.852753		19.7511	0.849514		19.7511	0.851139		19.751	0.846991		19.751	0.849117		19.7511	0.846136		19.7511	0.849775		19.751	0.847367		19.751	0.847108		19.7511	0.842372		19.7511	0.849392		19.7511	0.840132		19.7511	0.847815		19.751	0.832393		19.751	0.8507		19.7511	0.824244
19.8011	0.855306		19.8011	0.852175		19.8011	0.850925		19.801	0.848804		19.801	0.850935		19.8011	0.84628		19.8011	0.848861		19.801	0.844549		19.801	0.84732		19.8011	0.841466		19.8011	0.84887		19.8011	0.837839		19.8011	0.849569		19.801	0.831553		19.801	0.849405		19.8011	0.82653
19.8511	0.84958		19.8511	0.850209		19.8511	0.848016		19.851	0.848029		19.8511	0.849981		19.8511	0.848267		19.8511	0.849641		19.851	0.849796		19.851	0.848871		19.8511	0.843253		19.8511	0.848256		19.8511	0.839336		19.8511	0.851227		19.851	0.834677		19.851	0.849909		19.8511	0.825386
19.9011	0.853622		19.9011	0.850723		19.9011	0.85139		19.9011	0.850032		19.9011	0.849035		19.9011	0.847115		19.9011	0.846479		19.901	0.848063		19.901	0.848234		19.9011	0.841491		19.9011	0.847401		19.9011	0.837861		19.9011	0.849223		19.901	0.833543		19.901	0.849195		19.9011	0.822487
19.9511	0.85025		19.9511	0.850365		19.9511	0.851354		19.9511	0.850629		19.9511	0.849515		19.9511	0.847381		19.9511	0.848213		19.951	0.84748		19.951	0.851728		19.9511	0.841772		19.9511	0.848581		19.9511	0.836885		19.9511	0.847994		19.951	0.834341		19.951	0.846886		19.9511	0.823305
20.0011	0.848362		20.0011	0.850516		20.0011	0.849449		20.0011	0.847957		20.0011	0.85031		20.0011	0.845299		20.0011	0.848532		20.001	0.844525		20.001	0.85117		20.0011	0.841331		20.0011	0.847987		20.0011	0.838134		20.0011	0.851747		20.001	0.834252		20.001	0.847707		20.0011	0.826788
20.0511	0.850946		20.0511	0.849265		20.0511	0.849257		20.0511	0.848769		20.0511	0.852083		20.0511	0.85169		20.0511	0.848848		20.051	0.844689		20.051	0.847138		20.0511	0.842002		20.0511	0.848504		20.0511	0.838985		20.0511	0.84757		20.051	0.830544		20.051	0.848226		20.0511	0.82406
20.1011	0.849519		20.1011	0.850498		20.1011	0.849799		20.1011	0.848745		20.1011	0.849947		20.1011	0.846657		20.1011	0.848009		20.1011	0.844101		20.1011	0.845386		20.1011	0.843988		20.1011	0.846984		20.1011	0.837416		20.1011	0.852463		20.101	0.83187		20.1011	0.846627		20.1011	0.824186
20.1511	0.849456		20.1511	0.847463		20.1511	0.850205		20.1511	0.847512		20.1511	0.848406		20.1511	0.847189		20.1511	0.851838		20.1511	0.8463		20.1511	0.84801		20.1511	0.8406		20.1511	0.847636		20.1511	0.838632		20.1511	0.851335		20.1511	0.83333		20.1511	0.851571		20.1511	0.823125
20.2011	0.850735		20.2011	0.84917		20.2011	0.850046		20.2011	0.848845		20.2011	0.848242		20.2011	0.848163		20.2011	0.84678		20.2011	0.844831		20.2011	0.846648		20.2011	0.843915		20.2011	0.84746		20.2011	0.840707		20.2011	0.847751		20.2011	0.832674		20.2011	0.848259		20.2011	0.825461
20.2511	0.851165		20.2511	0.84997		20.2511	0.852392		20.2511	0.84812		20.2511	0.84902		20.2511	0.849762		20.2511	0.848576		20.2511	0.844845		20.2511	0.848469		20.2511	0.843178		20.2511	0.851039		20.2511	0.840324		20.2511	0.849472		20.2511	0.833471		20.2511	0.849517		20.2511	0.822411
20.3011	0.848277		20.3011	0.848692		20.3011	0.849148		20.3011	0.847446		20.3011	0.848965		20.3011	0.847269		20.3011	0.846445		20.3011	0.84553		20.3011	0.850101		20.3011	0.844154		20.3011	0.844569		20.3011	0.839318		20.3011	0.848628		20.3011	0.830795		20.3011	0.851709		20.3011	0.824526
20.3511	0.852988		20.3511	0.848497		20.3511	0.851294		20.3511	0.848394		20.3511	0.847512		20.3511	0.847441		20.3511	0.849582		20.3511	0.846456		20.3511	0.850848		20.3511	0.842321		20.3511	0.847201		20.3511	0.839342		20.3511	0.851563		20.3511	0.83127		20.3511	0.848446		20.3511	0.824646
20.4011	0.849618		20.4011	0.848827		20.4012	0.849009		20.4011	0.850396		20.4011	0.849602		20.4011	0.847586		20.4011	0.848804		20.4011	0.845249		20.4011	0.847392		20.4011	0.843621		20.4011	0.8477		20.4011	0.842419		20.4011	0.848708		20.4011	0.830853		20.4011	0.846433		20.4011	0.826039
20.4511	0.847753		20.4511	0.849943		20.4512	0.850317		20.4511	0.847083		20.4511	0.847022		20.4511	0.844944		20.4511	0.848528		20.4511	0.847536		20.4511	0.846716		20.4511	0.842031		20.4511	0.849073		20.4511	0.839455		20.4511	0.850051		20.4511	0.831565		20.4511	0.846999		20.4511	0.823719
20.5011	0.853018		20.5012	0.848848		20.5012	0.848874		20.5011	0.850083		20.5011	0.84481		20.5011	0.844032		20.5011	0.849807		20.5011	0.844889		20.5011	0.845734		20.5011	0.842131		20.5011	0.8458		20.5011	0.839921		20.5011	0.848463		20.5011	0.831558		20.5011	0.8486		20.5011	0.823977
20.5511	0.850873		20.5512	0.849137		20.5512	0.848606		20.5511	0.847586		20.5511	0.847313		20.5511	0.84747		20.5511	0.846945		20.5511	0.849056		20.5511	0.847477		20.5511	0.842246		20.5511	0.847222		20.5511	0.838067		20.5511	0.848067		20.5511	0.83324		20.5511	0.84838		20.5511	0.824131
20.6011	0.850664		20.6012	0.847463		20.6012	0.849529		20.6011	0.848006		20.6011	0.848946		20.6011	0.847744		20.6011	0.849959		20.6011	0.846391		20.6011	0.848062		20.6011	0.841003		20.6011	0.849952		20.6011	0.838123		20.6012	0.847486		20.6011	0.832758		20.6011	0.848664		20.6011	0.823555
20.6511	0.850973		20.6512	0.850994		20.6512	0.850623		20.6511	0.848339		20.6511	0.851244		20.6511	0.844934		20.6511	0.847759		20.6511	0.844526		20.6511	0.846724		20.6511	0.841767		20.6511	0.847658		20.6511	0.839374		20.6512	0.850818		20.6511	0.830518		20.6511	0.848175		20.6511	0.822688
20.7011	0.85067		20.7012	0.85019		20.7012	0.847654		20.7011	0.848237		20.7011	0.848603		20.7011	0.846163		20.7011	0.846516		20.7011	0.844747		20.7011	0.848658		20.7011	0.841898		20.7011	0.847465		20.7012	0.840885		20.7012	0.850855		20.7011	0.832603		20.7011	0.848697		20.7011	0.823434
20.7511	0.851657		20.7512	0.852126		20.7512	0.851174		20.7511	0.847062		20.7511	0.849956		20.7511	0.849561		20.7511	0.848795		20.7511	0.845178		20.7511	0.850178		20.7511	0.844247		20.7511	0.84748		20.7512	0.83743		20.7512	0.849811		20.7511	0.833009		20.7511	0.848894		20.7511	0.824634
20.8011	0.852127		20.8012	0.846629		20.8012	0.851479		20.8011	0.847118		20.8011	0.848308		20.8011	0.847165		20.8011	0.847612		20.8011	0.844905		20.8011	0.849285		20.8011	0.843607		20.8011	0.845979		20.8012	0.840373		20.8012	0.851824		20.8011	0.829188		20.8011	0.847551		20.8011	0.823952
20.8511	0.848234		20.8512	0.845224		20.8512	0.850066		20.8511	0.845486		20.8511	0.848218		20.8511	0.845403		20.8512	0.847414		20.8511	0.845355		20.8511	0.847227		20.8511	0.84186		20.8511	0.849169		20.8512	0.838608		20.8512	0.850623		20.8511	0.830677		20.8511	0.849776		20.8511	0.823946
20.9011	0.84885		20.9012	0.849729		20.9012	0.846703		20.9011	0.849864		20.9011	0.848236		20.9012	0.844131		20.9012	0.848572		20.9011	0.846561		20.9011	0.848884		20.9011	0.843316		20.9011	0.847484		20.9012	0.838793		20.9012	0.849776		20.9011	0.83042		20.9011	0.847352		20.9011	0.82638
20.9511	0.849538		20.9512	0.849024		20.9512	0.848266		20.9511	0.845802		20.9511	0.846376		20.9512	0.845671		20.9512	0.848597		20.9511	0.847441		20.9511	0.847462		20.9511	0.840153		20.9511	0.849372		20.9512	0.835764		20.9512	0.850755		20.9511	0.832964		20.9511	0.851513		20.9511	0.822182
21.0011	0.849266		21.0012	0.84651		21.0012	0.845388		21.0011	0.848746		21.0011	0.850249		21.0012	0.846151		21.0012	0.847124		21.0011	0.845486		21.0011	0.849605		21.0011	0.840393		21.0011	0.845494		21.0012	0.839584		21.0012	0.850811		21.0011	0.833996		21.0011	0.847042		21.0011	0.822174
21.0511	0.85785		21.0512	0.852853		21.0512	0.858097		21.0511	0.852818		21.0511	0.855885		21.0512	0.853492		21.0512	0.853856		21.0511	0.85349		21.0511	0.856778		21.0511	0.849462		21.0511	0.853971		21.0512	0.84966		21.0512	0.854776		21.0511	0.835859		21.0511	0.857068		21.0511	0.831097
21.1011	0.86656		21.1012	0.868084		21.1012	0.866099		21.1011	0.864357		21.1011	0.866743		21.1012	0.863039		21.1012	0.866535		21.1011	0.865003		21.1011	0.866014		21.1011	0.85946		21.1011	0.866456		21.1012	0.858752		21.1012	0.867335		21.1011	0.85082		21.1011	0.865542		21.1011	0.843675
21.1511	0.87244		21.1512	0.872123		21.1512	0.872795		21.1511	0.873586		21.1511	0.871908		21.1512	0.870055		21.1512	0.873896		21.1511	0.871068		21.1511	0.871417		21.1511	0.871309		21.1511	0.871578		21.1512	0.863007		21.1512	0.871347		21.1511	0.855643		21.1511	0.872487		21.1511	0.847841
21.2012	0.880877		21.2012	0.877965		21.2012	0.878348		21.2011	0.87487		21.2011	0.878367		21.2012	0.872998		21.2012	0.876746		21.2011	0.872941		21.2011	0.874349		21.2011	0.869911		21.2011	0.877021		21.2012	0.868799		21.2012	0.877511		21.2011	0.859412		21.2011	0.876901		21.2011	0.855124
21.2512	0.882368		21.2512	0.881439		21.2512	0.877193		21.2511	0.880129		21.2511	0.879267		21.2512	0.876899		21.2512	0.881572		21.2511	0.875274		21.2511	0.878379		21.2512	0.871825		21.2511	0.87896		21.2512	0.872565		21.2512	0.883064		21.2511	0.865937		21.2511	0.880222		21.2512	0.85708
21.3012	0.883539		21.3012	0.881065		21.3012	0.882937		21.3011	0.882644		21.3011	0.883598		21.3012	0.8821		21.3012	0.881058		21.3011	0.880152		21.3011	0.882879		21.3012	0.878685		21.3011	0.884756		21.3012	0.872902		21.3012	0.881729		21.3011	0.865671		21.3011	0.881718		21.3012	0.859885
21.3512	0.88876		21.3512	0.885188		21.3512	0.886186		21.3511	0.88311		21.3511	0.886355		21.3512	0.881493		21.3512	0.88628		21.3511	0.883002		21.3511	0.886307		21.3512	0.876186		21.3511	0.883224		21.3512	0.877562		21.3512	0.887239		21.3511	0.869235		21.3511	0.885255		21.3512	0.864723
21.4012	0.888425		21.4012	0.885156		21.4012	0.886535		21.4011	0.887247		21.4011	0.885085		21.4012	0.884095		21.4012	0.886719		21.4011	0.882477		21.4011	0.885456		21.4012	0.881579		21.4012	0.889366		21.4012	0.879092		21.4012	0.886978		21.4011	0.874502		21.4011	0.88688		21.4012	0.86546
21.4512	0.889099		21.4512	0.890564		21.4512	0.892389		21.4511	0.888098		21.4511	0.888684		21.4512	0.885847		21.4512	0.890593		21.4511	0.886223		21.4511	0.892351		21.4512	0.883263		21.4512	0.88681		21.4512	0.881554		21.4512	0.887788		21.4511	0.87248		21.4511	0.887469		21.4512	0.865956
21.5012	0.889559		21.5012	0.89053		21.5012	0.889503		21.5011	0.892293		21.5011	0.89086		21.5012	0.890577		21.5012	0.891931		21.5011	0.886824		21.5011	0.892051		21.5012	0.886785		21.5012	0.89198		21.5012	0.882506		21.5012	0.895038		21.5011	0.877986		21.5011	0.891477		21.5012	0.871541
21.5512	0.892265		21.5512	0.893095		21.5512	0.894731		21.5511	0.889474		21.5511	0.895616		21.5512	0.891422		21.5512	0.89027		21.5511	0.887368		21.5511	0.892709		21.5512	0.887747		21.5512	0.89124		21.5512	0.883431		21.5512	0.895173		21.5511	0.878859		21.5511	0.890813		21.5512	0.871375
21.6012	0.894316		21.6012	0.89435		21.6012	0.891864		21.6011	0.895138		21.6011	0.893035		21.6012	0.892076		21.6012	0.892778		21.6011	0.893279		21.6011	0.896517		21.6012	0.887976		21.6012	0.892405		21.6012	0.884584		21.6012	0.896373		21.6011	0.877712		21.6011	0.892492		21.6012	0.873477
21.6512	0.898058		21.6512	0.897909		21.6512	0.895249		21.6511	0.893565		21.6512	0.895399		21.6512	0.895426		21.6512	0.894683		21.6511	0.892048		21.6511	0.894646		21.6512	0.887957		21.6512	0.896253		21.6512	0.886587		21.6512	0.896275		21.6511	0.880011		21.6511	0.895863		21.6512	0.873926
21.7012	0.899552		21.7012	0.896779		21.7012	0.896552		21.7012	0.897899		21.7012	0.896851		21.7012	0.89496		21.7012	0.898609		21.7011	0.890269		21.7011	0.895311		21.7012	0.891952		21.7012	0.894425		21.7012	0.887383		21.7012	0.897475		21.7011	0.882779		21.7011	0.895451		21.7012	0.87735
21.7512	0.899081		21.7512	0.897892		21.7512	0.896049		21.7512	0.897527		21.7512	0.899303		21.7512	0.897508		21.7512	0.898069		21.7511	0.894685		21.7511	0.898215		21.7512	0.892222		21.7512	0.896409		21.7512	0.891081		21.7512	0.898617		21.7511	0.884326		21.7511	0.897398		21.7512	0.877331
21.8012	0.897614		21.8012	0.90028		21.8012	0.898945		21.8012	0.900211		21.8012	0.902148		21.8012	0.898494		21.8012	0.899778		21.8011	0.897674		21.8011	0.901662		21.8012	0.894332		21.8012	0.899094		21.8012	0.892282		21.8012	0.899046		21.8011	0.885189		21.8011	0.897455		21.8012	0.878863
21.8512	0.90177		21.8512	0.900488		21.8512	0.901288		21.8512	0.899812		21.8512	0.899582		21.8512	0.896916		21.8512	0.89932		21.8511	0.897998		21.8511	0.899973		21.8512	0.895708		21.8512	0.899217		21.8512	0.89335		21.8512	0.904594		21.8511	0.887945		21.8511	0.902023		21.8512	0.881637
21.9012	0.900742		21.9012	0.901164		21.9012	0.90295		21.9012	0.901038		21.9012	0.900198		21.9012	0.898532		21.9012	0.902403		21.9011	0.895357		21.9012	0.90051		21.9012	0.896284		21.9012	0.90103		21.9012	0.893471		21.9012	0.900154		21.9011	0.888284		21.9011	0.902111		21.9012	0.883376
21.9512	0.905918		21.9512	0.904195		21.9512	0.90183		21.9512	0.902375		21.9512	0.902952		21.9512	0.898176		21.9512	0.902844		21.9511	0.90137		21.9512	0.901085		21.9512	0.893913		21.9512	0.902401		21.9512	0.895851		21.9512	0.905282		21.9511	0.887192		21.9512	0.901925		21.9512	0.880383
21.9912	0.905918		21.9912	0.904195		21.9912	0.90183		21.9912	0.902375		21.9912	0.902952		21.9912	0.898176		21.9912	0.902844		21.9912	0.90137		21.9912	0.901085		21.9912	0.893913		21.9912	0.902401		21.9912	0.895851		21.9912	0.905282		21.9912	0.887192		21.9912	0.901925		21.9912	0.880383
