# Supplementary material for: Binding and sequestration of poison frog alkaloids by a plasma globulin
Source: eLife journal article supplement (doi:10.7554/elife.85096), 2023-12-14
Supplement: fig5-data1 [file BSA+PTX_R2 analysis_CapillaryScanRawData.xlsx]

## Sheet: RawData
NanoTemper Technologies	NanoTemper Technologies
MO.Affinity Analysis v3.0.5	MO.Affinity Analysis v3.0.5
Origin of exported data	Origin of exported data
Project Title:	20230407_BSA+PTX
Comment:
Project File Path:	C:\Users\nanotemper\Desktop\Aurora_MST\20230407_BSA\BSA+PTX analysis.nta3
Analysis-Set Name:	Analysis-Set #1
Exported from:	Capillary Scan (Raw Data Inspection)
Exported on:	2023-04-07 09:24:27
Sample Information	Sample Information		Sample Information	Sample Information		Sample Information	Sample Information		Sample Information	Sample Information		Sample Information	Sample Information		Sample Information	Sample Information		Sample Information	Sample Information		Sample Information	Sample Information		Sample Information	Sample Information		Sample Information	Sample Information		Sample Information	Sample Information		Sample Information	Sample Information		Sample Information	Sample Information		Sample Information	Sample Information		Sample Information	Sample Information		Sample Information	Sample Information
Merge-Set Name:	BSA+PTX_R2 (#17)		Merge-Set Name:	BSA+PTX_R2 (#17)		Merge-Set Name:	BSA+PTX_R2 (#17)		Merge-Set Name:	BSA+PTX_R2 (#17)		Merge-Set Name:	BSA+PTX_R2 (#17)		Merge-Set Name:	BSA+PTX_R2 (#17)		Merge-Set Name:	BSA+PTX_R2 (#17)		Merge-Set Name:	BSA+PTX_R2 (#17)		Merge-Set Name:	BSA+PTX_R2 (#17)		Merge-Set Name:	BSA+PTX_R2 (#17)		Merge-Set Name:	BSA+PTX_R2 (#17)		Merge-Set Name:	BSA+PTX_R2 (#17)		Merge-Set Name:	BSA+PTX_R2 (#17)		Merge-Set Name:	BSA+PTX_R2 (#17)		Merge-Set Name:	BSA+PTX_R2 (#17)		Merge-Set Name:	BSA+PTX_R2 (#17)
Run Name:	BSA+PTX_R2 (#17)		Run Name:	BSA+PTX_R2 (#17)		Run Name:	BSA+PTX_R2 (#17)		Run Name:	BSA+PTX_R2 (#17)		Run Name:	BSA+PTX_R2 (#17)		Run Name:	BSA+PTX_R2 (#17)		Run Name:	BSA+PTX_R2 (#17)		Run Name:	BSA+PTX_R2 (#17)		Run Name:	BSA+PTX_R2 (#17)		Run Name:	BSA+PTX_R2 (#17)		Run Name:	BSA+PTX_R2 (#17)		Run Name:	BSA+PTX_R2 (#17)		Run Name:	BSA+PTX_R2 (#17)		Run Name:	BSA+PTX_R2 (#17)		Run Name:	BSA+PTX_R2 (#17)		Run Name:	BSA+PTX_R2 (#17)
Date of Measurement:	2023-04-07 08:52:31		Date of Measurement:	2023-04-07 08:52:58		Date of Measurement:	2023-04-07 08:53:25		Date of Measurement:	2023-04-07 08:53:51		Date of Measurement:	2023-04-07 08:54:18		Date of Measurement:	2023-04-07 08:54:44		Date of Measurement:	2023-04-07 08:55:11		Date of Measurement:	2023-04-07 08:55:38		Date of Measurement:	2023-04-07 08:56:05		Date of Measurement:	2023-04-07 08:56:31		Date of Measurement:	2023-04-07 08:56:58		Date of Measurement:	2023-04-07 08:57:24		Date of Measurement:	2023-04-07 08:57:51		Date of Measurement:	2023-04-07 08:58:18		Date of Measurement:	2023-04-07 08:58:45		Date of Measurement:	2023-04-07 08:59:11
Capillary Type:	Monolith Premium Capillary		Capillary Type:	Monolith Premium Capillary		Capillary Type:	Monolith Premium Capillary		Capillary Type:	Monolith Premium Capillary		Capillary Type:	Monolith Premium Capillary		Capillary Type:	Monolith Premium Capillary		Capillary Type:	Monolith Premium Capillary		Capillary Type:	Monolith Premium Capillary		Capillary Type:	Monolith Premium Capillary		Capillary Type:	Monolith Premium Capillary		Capillary Type:	Monolith Premium Capillary		Capillary Type:	Monolith Premium Capillary		Capillary Type:	Monolith Premium Capillary		Capillary Type:	Monolith Premium Capillary		Capillary Type:	Monolith Premium Capillary		Capillary Type:	Monolith Premium Capillary
Capillary Position:	1		Capillary Position:	9		Capillary Position:	2		Capillary Position:	10		Capillary Position:	3		Capillary Position:	11		Capillary Position:	4		Capillary Position:	12		Capillary Position:	5		Capillary Position:	13		Capillary Position:	6		Capillary Position:	14		Capillary Position:	7		Capillary Position:	15		Capillary Position:	8		Capillary Position:	16
Ligand:	PTX		Ligand:	PTX		Ligand:	PTX		Ligand:	PTX		Ligand:	PTX		Ligand:	PTX		Ligand:	PTX		Ligand:	PTX		Ligand:	PTX		Ligand:	PTX		Ligand:	PTX		Ligand:	PTX		Ligand:	PTX		Ligand:	PTX		Ligand:	PTX		Ligand:	PTX
Ligand Concentration:	0.005		Ligand Concentration:	1.95313e-05		Ligand Concentration:	0.0025		Ligand Concentration:	9.76563e-06		Ligand Concentration:	0.00125		Ligand Concentration:	4.88281e-06		Ligand Concentration:	0.000625		Ligand Concentration:	2.44141e-06		Ligand Concentration:	0.0003125		Ligand Concentration:	1.2207e-06		Ligand Concentration:	0.00015625		Ligand Concentration:	6.10352e-07		Ligand Concentration:	7.8125e-05		Ligand Concentration:	3.05176e-07		Ligand Concentration:	3.90625e-05		Ligand Concentration:	1.52588e-07
Target:	BSA		Target:	BSA		Target:	BSA		Target:	BSA		Target:	BSA		Target:	BSA		Target:	BSA		Target:	BSA		Target:	BSA		Target:	BSA		Target:	BSA		Target:	BSA		Target:	BSA		Target:	BSA		Target:	BSA		Target:	BSA
TargetConcentration:	5e-09		TargetConcentration:	5e-09		TargetConcentration:	5e-09		TargetConcentration:	5e-09		TargetConcentration:	5e-09		TargetConcentration:	5e-09		TargetConcentration:	5e-09		TargetConcentration:	5e-09		TargetConcentration:	5e-09		TargetConcentration:	5e-09		TargetConcentration:	5e-09		TargetConcentration:	5e-09		TargetConcentration:	5e-09		TargetConcentration:	5e-09		TargetConcentration:	5e-09		TargetConcentration:	5e-09
Measurement Settings	Measurement Settings		Measurement Settings	Measurement Settings		Measurement Settings	Measurement Settings		Measurement Settings	Measurement Settings		Measurement Settings	Measurement Settings		Measurement Settings	Measurement Settings		Measurement Settings	Measurement Settings		Measurement Settings	Measurement Settings		Measurement Settings	Measurement Settings		Measurement Settings	Measurement Settings		Measurement Settings	Measurement Settings		Measurement Settings	Measurement Settings		Measurement Settings	Measurement Settings		Measurement Settings	Measurement Settings		Measurement Settings	Measurement Settings		Measurement Settings	Measurement Settings
MST-Power:	Medium		MST-Power:	Medium		MST-Power:	Medium		MST-Power:	Medium		MST-Power:	Medium		MST-Power:	Medium		MST-Power:	Medium		MST-Power:	Medium		MST-Power:	Medium		MST-Power:	Medium		MST-Power:	Medium		MST-Power:	Medium		MST-Power:	Medium		MST-Power:	Medium		MST-Power:	Medium		MST-Power:	Medium
Excitation-Power:	30		Excitation-Power:	30		Excitation-Power:	30		Excitation-Power:	30		Excitation-Power:	30		Excitation-Power:	30		Excitation-Power:	30		Excitation-Power:	30		Excitation-Power:	30		Excitation-Power:	30		Excitation-Power:	30		Excitation-Power:	30		Excitation-Power:	30		Excitation-Power:	30		Excitation-Power:	30		Excitation-Power:	30
Excitation type:	Pico - RED		Excitation type:	Pico - RED		Excitation type:	Pico - RED		Excitation type:	Pico - RED		Excitation type:	Pico - RED		Excitation type:	Pico - RED		Excitation type:	Pico - RED		Excitation type:	Pico - RED		Excitation type:	Pico - RED		Excitation type:	Pico - RED		Excitation type:	Pico - RED		Excitation type:	Pico - RED		Excitation type:	Pico - RED		Excitation type:	Pico - RED		Excitation type:	Pico - RED		Excitation type:	Pico - RED
Thermostat Setpoint:	25		Thermostat Setpoint:	25		Thermostat Setpoint:	25		Thermostat Setpoint:	25		Thermostat Setpoint:	25		Thermostat Setpoint:	25		Thermostat Setpoint:	25		Thermostat Setpoint:	25		Thermostat Setpoint:	25		Thermostat Setpoint:	25		Thermostat Setpoint:	25		Thermostat Setpoint:	25		Thermostat Setpoint:	25		Thermostat Setpoint:	25		Thermostat Setpoint:	25		Thermostat Setpoint:	25
Included	Included		Included	Included		Included	Included		Included	Included		Included	Included		Included	Included		Included	Included		Included	Included		Included	Included		Included	Included		Included	Included		Included	Included		Included	Included		Included	Included		Included	Included		Included	Included
Position [capillary-index]	Raw Fluorescence [counts]		Position [capillary-index]	Raw Fluorescence [counts]		Position [capillary-index]	Raw Fluorescence [counts]		Position [capillary-index]	Raw Fluorescence [counts]		Position [capillary-index]	Raw Fluorescence [counts]		Position [capillary-index]	Raw Fluorescence [counts]		Position [capillary-index]	Raw Fluorescence [counts]		Position [capillary-index]	Raw Fluorescence [counts]		Position [capillary-index]	Raw Fluorescence [counts]		Position [capillary-index]	Raw Fluorescence [counts]		Position [capillary-index]	Raw Fluorescence [counts]		Position [capillary-index]	Raw Fluorescence [counts]		Position [capillary-index]	Raw Fluorescence [counts]		Position [capillary-index]	Raw Fluorescence [counts]		Position [capillary-index]	Raw Fluorescence [counts]		Position [capillary-index]	Raw Fluorescence [counts]
0.500408	192.992		8.50069	113.448		1.50167	104.17		9.50108	84.0568		2.50035	78.7512		10.5003	72.8701		3.50027	82.9354		11.5006	81.9214		4.50132	80.9044		12.5012	78.3665		5.50155	77.433		13.5001	71.4863		6.50016	56.9146		14.5018	73.6097		7.50142	68.4741		15.501	79.7771
0.50138	167.448		8.50194	103.606		1.50299	107.036		9.50198	88.1664		2.50202	67.2275		10.502	72.542		3.50201	87.2687		11.5018	77.8505		4.50306	87.9875		12.5023	65.0295		5.50252	69.4762		13.5016	70.3053		6.5019	61.7013		14.5031	68.9811		7.50294	72.9267		15.5026	82.16
0.502561	172.659		8.50271	114.041		1.50389	117.244		9.5033	94.3398		2.50292	60.6873		10.5032	76.419		3.50312	83.7048		11.5037	73.9228		4.50438	83.8361		12.5033	72.378		5.50357	83.1054		13.5024	68.5189		6.5028	62.2977		14.5038	75.8524		7.50392	68.9632		15.5037	82.506
0.504297	182.196		8.50396	121.896		1.50528	105.64		9.50511	86.04		2.50383	54.9582		10.5042	81.0058		3.50395	83.9285		11.5051	66.8995		4.50528	86.046		12.5049	76.2997		5.50523	84.9723		13.5035	65.4679		6.5037	63.1686		14.5051	82.2644		7.50496	59.6166		15.5047	81.1401
0.505894	170.699		8.50569	119.937		1.50715	98.7507		9.5065	89.255		2.50542	60.5024		10.5056	70.1949		3.50534	89.416		11.5059	71.3521		4.5066	89.6665		12.5067	73.7051		5.50697	73.6842		13.5051	69.336		6.50523	66.5714		14.5068	66.9889		7.50663	56.9683		15.5064	79.9441
0.506866	183.657		8.50708	132.129		1.50847	91.9182		9.50733	85.9237		2.50709	68.152		10.5074	63.4787		3.50708	83.9733		11.507	72.7866		4.50841	81.7902		12.5077	69.163		5.50794	80.5078		13.5067	73.7558		6.5069	79.5863		14.5082	69.172		7.50836	74.063		15.5081	69.4106
0.507977	194.656		8.50805	127.903		1.50924	111.053		9.50844	81.2534		2.5082	64.779		10.5087	67.5407		3.50833	80.7434		11.5087	70.4753		4.50987	92.786		12.5085	78.1309		5.50884	84.9723		13.5077	75.8345		6.50801	74.0511		14.5092	72.548		7.50947	79.0256		15.5091	71.8799
0.509644	191.784		8.50931	113.799		1.51042	98.4614		9.51018	80.5794		2.50917	67.487		10.5096	76.2789		3.5093	85.879		11.5103	68.4264		4.51084	91.3008		12.51	70.4633		5.51037	85.4406		13.5087	77.5971		6.50905	83.2396		14.5104	67.0337		7.51044	72.7239		15.51	77.3048
0.511311	198.831		8.51097	107.158		1.51215	104.542		9.51163	79.7443		2.5107	79.0137		10.5109	76.6218		3.51062	94.5784		11.5112	62.8763		4.51202	99.2189		12.5117	73.4457		5.51204	76.1983		13.5103	70.681		6.51051	77.7462		14.5121	75.3991		7.5119	63.7978		15.5115	76.4996
0.512352	199.106		8.51257	115.147		1.51354	96.0845		9.51268	92.2224		2.51244	94.5396		10.5127	79.455		3.51236	84.1015		11.5123	73.2608		4.51376	97.9037		12.5129	61.1287		5.51322	68.6232		13.5121	66.8637		6.51225	75.5542		14.5137	73.392		7.51371	59.554		15.5132	77.2451
0.513394	181.838		8.51361	101.828		1.51451	95.995		9.51379	87.5729		2.51369	89.1535		10.5142	72.7508		3.51381	78.8049		11.5139	70.0249		4.51528	90.8773		12.5138	53.6043		5.51419	74.0063		13.5133	84.5429		6.51357	74.3075		14.5147	55.6919		7.51503	76.4429		15.5144	78.8735
0.515061	175.387		8.51465	96.2783		1.5157	115.088		9.51546	86.0012		2.51466	82.7803		10.5151	71.8352		3.51479	80.0873		11.5156	81.6381		4.51626	101.465		12.5152	68.7664		5.51565	73.2667		13.5142	71.0061		6.51447	63.431		14.5158	67.8866		7.51593	79.6757		15.5153	79.1807
0.516797	165.164		8.51639	112.768		1.51736	110.919		9.51712	84.4504		2.51598	81.0237		10.5163	75.6108		3.51597	82.1361		11.5168	77.5374		4.51737	90.3554		12.517	64.0275		5.51746	76.6129		13.5157	72.3064		6.51579	66.1837		14.5175	68.2415		7.51732	73.0162		15.5168	75.8584
0.517769	170.532		8.51806	114.73		1.51896	107.095		9.51823	110.328		2.51778	72.2826		10.5182	73.717		3.5177	90.9221		11.5178	64.3048		4.5191	95.0317		12.5184	66.9859		5.51877	66.1777		13.5175	69.9265		6.51759	69.9623		14.5191	56.8908		7.5192	70.0219		15.5186	88.7867
0.518602	172.835		8.51903	112.547		1.52	112.073		9.51921	97.176		2.51917	73.2518		10.5196	70.3649		3.5193	75.1008		11.5192	69.2674		4.52077	99.5112		12.5193	67.2872		5.51968	64.4122		13.5187	64.7313		6.51905	65.6886		14.5202	72.8641		7.52045	72.4973		15.5199	87.7638
0.52013	173.637		8.52007	103.818		1.52104	99.9376		9.5208	83.0398		2.52008	72.6583		10.5204	69.8072		3.52027	75.1694		11.521	69.2585		4.52167	89.3265		12.5206	68.8439		5.521	64.8596		13.5196	72.9267		6.51995	66.2076		14.5212	81.3607		7.52121	68.6352		15.5208	83.3261
0.521797	171.03		8.52174	106.063		1.52271	86.8333		9.52254	85.2318		2.5214	79.9352		10.5215	78.6409		3.52138	85.5748		11.5223	70.7645		4.52257	85.7746		12.5224	68.2564		5.5228	72.6464		13.5211	67.8657		6.5212	70.6423		14.5228	77.1855		7.52246	77.6716		15.5221	71.0628
0.522977	171.111		8.52347	123.495		1.52445	103.543		9.52365	90.4837		2.52327	93.2393		10.5232	66.4909		3.52312	88.3871		11.5232	70.514		4.52417	91.0384		12.5238	68.3489		5.52426	73.5262		13.5229	67.141		6.52308	68.2176		14.5246	79.6608		7.5242	76.1178		15.5239	75.3931
0.52395	153.339		8.52444	119.2		1.52556	108.968		9.52462	77.0602		2.52466	81.9602		10.5247	72.4525		3.52479	75.8405		11.5246	71.3372		4.52584	93.4541		12.5247	70.1532		5.52516	71.6115		13.5242	71.2089		6.52454	81.0476		14.5256	71.2238		7.52558	78.4291		15.5254	79.8726
0.525408	158.904		8.52528	109.007		1.52653	117.894		9.52622	80.645		2.52542	73.7886		10.5258	70.2784		3.52569	70.0816		11.5264	73.5053		4.52695	88.0978		12.526	60.7111		5.52641	75.9269		13.525	68.9513		6.5253	71.5698		14.5265	74.5193		7.52649	77.773		15.5263	82.0198
0.527144	176.494		8.52681	119.931		1.52813	99.9824		9.52796	84.0568		2.5266	70.2784		10.5269	74.4298		3.52659	81.0297		11.5277	69.7565		4.52792	82.7058		12.5279	64.1885		5.52829	81.6649		13.5262	63.6786		6.52641	63.0284		14.5279	81.647		7.52774	73.2309		15.5276	79.3686
0.528464	187.436		8.52847	107.79		1.52993	92.5773		9.52907	73.2906		2.52827	86.6723		10.5285	66.6579		3.52819	81.4323		11.5284	70.517		4.52945	92.1359		12.5293	76.0462		5.52975	77.0811		13.528	73.5351		6.52815	67.4542		14.5296	81.492		7.52947	66.8696		15.5294	88.0799
0.529366	186.67		8.52965	110.328		1.53097	95.3657		9.5299	75.7063		2.52973	84.1224		10.5301	69.0259		3.52986	83.8868		11.5298	72.6136		4.53126	102.365		12.5302	71.5996		5.53058	75.0501		13.5293	83.7406		6.52961	70.4126		14.5309	72.1722		7.53107	70.1263		15.5309	83.2068
0.530686	175.626		8.53062	117.42		1.53181	106.299		9.53129	77.5016		2.5307	78.0325		10.5312	81.5039		3.5309	84.0448		11.5315	76.4041		4.53257	102.488		12.5312	76.7113		5.53162	79.2463		13.5303	74.4149		6.53058	77.9579		14.5318	79.971		7.53204	93.0992		15.5317	79.461
0.532491	170.228		8.53208	108.401		1.53326	102.64		9.53296	87.1733		2.53188	60.9706		10.5322	76.3475		3.53194	81.8976		11.5328	72.8432		4.53348	91.4827		12.5329	75.4945		5.53336	75.6973		13.5315	66.464		6.53169	75.584		14.5332	78.8914		7.53308	80.4124		15.5328	88.8344
0.53388	180.04		8.53382	105.583		1.535	97.1104		9.53427	89.7053		2.53355	64.9967		10.5337	71.8859		3.53347	77.6746		11.5338	64.9252		4.53487	85.7686		12.5344	61.3732		5.53489	72.0738		13.5332	64.2541		6.53336	67.4989		14.535	81.322		7.53482	70.4454		15.5345	79.6608
0.534852	190.973		8.53514	116.284		1.53618	87.051		9.53525	83.5021		2.53521	80.141		10.5355	67.8419		3.5352	72.7657		11.535	67.5347		4.53667	103.701		12.5354	67.0188		5.53586	72.2438		13.5348	71.0568		6.53502	77.3764		14.5364	77.7283		7.53649	74.3761		15.536	68.838
0.536103	190.329		8.53604	97.1044		1.53708	98.4882		9.53657	94.9393		2.53626	84.2864		10.5367	64.6836		3.53652	78.0891		11.5367	63.0314		4.53799	90.4717		12.5365	73.1623		5.53697	68.0924		13.5358	69.9206		6.53614	73.2548		14.5373	86.9914		7.53753	66.7414		15.537	64.5703
0.537908	171.516		8.53736	99.1503		1.53847	105.834		9.5383	90.1824		2.5373	71.9396		10.5376	67.6242		3.53743	74.9875		11.5383	73.2041		4.53889	94.4889		12.5381	63.44		5.53857	78.2084		13.5369	72.6673		6.53711	65.8855		14.5386	76.255		7.53857	73.72		15.5381	73.9258
0.539366	169.262		8.53917	106.32		1.54028	96.326		9.53976	79.1031		2.5389	77.5165		10.5392	78.9749		3.53881	80.4183		11.5393	78.3665		4.54021	84.3789		12.5399	59.0142		5.5403	80.8478		13.5386	63.9619		6.5387	59.3691		14.5404	75.3603		7.54024	71.9038		15.5398	76.3982
0.54013	177.955		8.54062	120.292		1.54167	102.935		9.54073	75.2887		2.54063	76.8664		10.541	73.2995		3.54062	81.3965		11.5404	76.2073		4.54209	77.5702		12.541	65.4679		5.54141	68.3787		13.5403	66.8458		6.54044	58.1404		14.5419	76.1506		7.54197	64.9252		15.5414	72.6971
0.541241	187.269		8.54153	107.414		1.54257	98.4166		9.54191	79.0256		2.54174	70.9226		10.5421	68.4264		3.54194	70.6393		11.5421	71.1254		4.54348	82.5417		12.542	75.5571		5.54239	68.4413		13.5413	65.3576		6.54162	61.749		14.5428	85.8611		7.54295	76.5324		15.5426	80.0187
0.542978	193.63		8.54278	120.68		1.54382	92.3983		9.54365	85.0976		2.54271	73.3025		10.5429	64.6568		3.54284	74.406		11.5438	70.9047		4.54424	84.1403		12.5434	79.9173		5.54391	75.7808		13.5424	65.6707		6.54252	56.2734		14.544	75.0919		7.54378	81.4472		15.5435	84.3997
0.544505	173.852		8.54458	111.1		1.54563	97.0358		9.54518	87.1703		2.54431	68.6799		10.5443	69.2644		3.54423	73.5292		11.5448	74.4239		4.54542	92.9799		12.5452	73.7021		5.54572	70.851		13.544	77.9669		6.54405	67.2722		14.5458	68.4413		7.54531	78.9451		15.5451	79.5833
0.545477	175.739		8.54604	111.42		1.54715	104.199		9.54615	77.6		2.54605	71.6712		10.546	57.3352		3.54604	78.0414		11.5458	72.5003		4.54716	85.2437		12.5465	67.8329		5.5469	75.08		13.5458	83.3619		6.54586	67.4154		14.5474	64.6448		7.54697	71.2805		15.5469	71.1523
0.546589	181.802		8.54688	113.284		1.54806	100.844		9.54726	75.0323		2.54716	83.7406		10.5473	59.2409		3.54743	84.9783		11.5475	62.9628		4.54862	91.939		12.5474	72.2318		5.5478	73.2876		13.5467	80.1052		6.54704	67.3468		14.5482	76.4906		7.54815	68.2594		15.548	72.721
0.548186	176.977		8.54792	109.251		1.54924	93.0604		9.549	78.7363		2.54799	67.4691		10.5483	70.4693		3.54819	96.493		11.5492	67.1142		4.54959	93.3079		12.5489	74.1525		5.54933	76.4131		13.5476	76.085		6.5478	69.685		14.5492	80.6629		7.54913	66.5356		15.5489	71.0151
0.549922	190.365		8.54965	114.226		1.55104	95.482		9.55066	78.8109		2.54938	62.4707		10.5495	76.3475		3.54937	99.1831		11.5502	71.03		4.5507	89.0283		12.5507	70.5528		5.55114	68.1699		13.5491	73.4128		6.54919	66.2195		14.5509	79.5892		7.55058	64.6478		15.5505	79.8606
0.551033	191.054		8.55118	108.375		1.55257	94.5814		9.55157	83.7168		2.55112	71.0986		10.5512	77.093		3.55104	77.1348		11.5511	82.4612		4.55244	75.3066		12.5519	67.6689		5.55232	66.8517		13.5508	69.8728		6.55093	75.6794		14.5525	74.4805		7.55232	60.2936		15.5523	81.2086
0.552005	188.358		8.55215	109.12		1.55347	101.128		9.55254	72.9983		2.55237	77.7342		10.5528	75.8375		3.55249	79.5594		11.5526	83.5945		4.5541	76.5145		12.5527	60.8513		5.55315	78.6856		13.5519	74.1704		6.55225	70.0846		14.5535	71.0568		7.55371	76.0612		15.5535	91.3784
0.553533	182.98		8.55326	108.309		1.55445	99.5768		9.55414	79.5982		2.55327	71.8173		10.5537	64.4182		3.55347	74.6446		11.5543	80.0634		4.55514	84.6473		12.554	66.643		5.55454	72.0708		13.5529	66.646		6.55322	61.1436		14.5545	71.9992		7.55461	74.8324		15.5542	86.9466
0.555339	178.722		8.55486	97.51		1.55611	93.3497		9.55573	87.892		2.55466	77.1437		10.5549	71.4326		3.55465	70.8868		11.5555	66.5356		4.55612	87.3522		12.5557	74.227		5.55621	68.4771		13.5544	66.2463		6.55447	59.6524		14.5561	59.0261		7.55586	72.0976		15.5556	74.2419
0.556519	189.434		8.5566	111.983		1.55764	102.986		9.55684	88.4795		2.5564	86.3502		10.5567	76.0284		3.55631	73.1772		11.5564	73.2697		4.55778	100.6		12.557	63.0135		5.55752	81.2743		13.5561	63.8814		6.55621	64.3197		14.5579	62.6139		7.55767	74.1972		15.5573	77.8804
0.557422	179.494		8.55771	107.814		1.55868	104.167		9.55782	76.8246		2.55785	87.388		10.5583	71.9813		3.55798	77.4628		11.5578	81.313		4.55952	104.894		12.5579	69.6969		5.5585	85.8462		13.5575	62.4647		6.55773	65.8169		14.5591	80.1201		7.55913	83.854		15.5587	77.8804
0.55895	176.882		8.55868	117.882		1.55972	96.6899		9.55934	83.6333		2.55876	64.5375		10.5592	77.8744		3.55902	91.9271		11.5596	77.8207		4.56063	87.5938		12.5593	67.9194		5.55975	76.422		13.5584	66.1986		6.55864	73.9527		14.56	70.3291		7.56003	72.8074		15.5596	84.5339
0.560755	180.281		8.56021	123.713		1.56132	89.4369		9.56115	82.4433		2.55994	70.4097		10.5603	73.0967		3.56006	87.3492		11.5609	69.8877		4.5616	88.241		12.561	56.5955		5.56148	67.4035		13.5597	67.9045		6.55982	73.9646		14.5615	72.3929		7.56128	69.6014		15.5609	80.141
0.561936	177.66		8.56201	109.535		1.56306	94.146		9.5624	73.3622		2.56174	68.4025		10.562	72.2587		3.56173	74.227		11.5618	72.1543		4.5632	81.2116		12.5625	59.4675		5.56301	66.2941		13.5615	68.0387		6.56155	80.7195		14.5633	77.943		7.56315	70.9256		15.5626	72.885
0.5627	186.908		8.56319	119.728		1.56424	94.477		9.5633	88.0978		2.56334	83.1979		10.5637	67.3259		3.56347	77.1527		11.5632	81.8469		4.56494	81.6053		12.5635	71.3521		5.56398	81.5158		13.563	65.5843		6.56315	81.8856		14.5645	81.2355		7.56461	80.1529		15.5642	71.5817
0.564089	191.614		8.5641	132.138		1.56521	92.2671		9.56469	87.9606		2.56431	81.5576		10.5646	67.9463		3.56458	79.1031		11.565	76.1745		4.56598	69.9623		12.5646	70.5975		5.56509	75.2261		13.5639	61.2927		6.56419	68.6024		14.5654	85.873		7.56544	77.9788		15.5651	71.03
0.565755	186.455		8.56563	134.539		1.56667	101.399		9.5665	81.5248		2.56542	75.1814		10.5655	64.3108		3.56555	75.2321		11.5664	70.6572		4.56681	89.9916		12.5663	61.5223		5.56683	63.5652		13.5651	62.2619		6.56523	75.7242		14.5669	76.249		7.56649	70.2098		15.5662	81.0416
0.567075	195.408		8.56743	132.776		1.5684	91.5871		9.56782	93.7076		2.56716	76.4697		10.5671	59.7777		3.56715	77.1736		11.5673	71.2		4.56827	87.9308		12.5679	61.3583		5.56843	74.0421		13.5669	69.5388		6.56697	77.9639		14.5687	73.723		7.56815	62.092		15.568	81.8439
0.568047	188.692		8.56861	128.353		1.56972	87.1554		9.56872	92.5117		2.56876	75.4826		10.5687	66.0227		3.56888	74.227		11.5686	66.3		4.56994	87.5371		12.569	71.3014		5.5694	75.7748		13.5684	82.5328		6.56863	88.4915		14.57	76.3415		7.56968	62.1874		15.5696	84.7278
0.569297	182.473		8.56938	122.406		1.57063	96.5795		9.57004	82.1928		2.56966	60.7768		10.5699	64.8118		3.56993	68.8678		11.5704	78.4023		4.57119	97.182		12.57	64.3854		5.57044	69.7088		13.5692	75.2201		6.56954	77.1497		14.5707	78.0504		7.57065	69.1123		15.5705	85.8939
0.571033	176.893		8.57069	122.8		1.57201	92.106		9.57191	75.071		2.57063	66.9561		10.5708	66.2821		3.57076	82.4821		11.5718	75.3245		4.57216	91.5573		12.5718	64.117		5.57225	69.1004		13.5703	70.7824		6.57044	60.7469		14.572	75.8912		7.57176	70.0697		15.5717	83.5408
0.572561	182.014		8.57243	130.772		1.57389	94.8975		9.57323	70.8451		2.57223	82.9801		10.5723	66.804		3.57222	80.7613		11.5726	65.8049		4.57348	78.2621		12.5734	69.002		5.57391	77.0871		13.572	75.6496		6.57204	63.3803		14.5738	80.2603		7.57336	73.0669		15.5734	80.9462
0.573533	187.317		8.57375	126.54		1.57514	110.185		9.574	78.9331		2.57383	73.8691		10.5741	60.8632		3.57388	89.0044		11.5737	79.2642		4.57528	90.6716		12.5744	62.9896		5.57482	76.1327		13.5735	76.3534		6.5737	64.8267		14.5751	77.0334		7.5751	74.7877		15.5751	75.8434
0.574644	188.525		8.57472	129.09		1.5759	106.931		9.57525	82.9503		2.57487	73.0073		10.5754	58.036		3.57513	91.5782		11.5755	71.6861		4.57674	91.7869		12.5753	70.6363		5.57572	69.1243		13.5745	76.8694		6.57482	65.5127		14.5761	91.2054		7.57621	85.697		15.576	69.9056
0.57638	198.211		8.5759	134.53		1.57722	104.99		9.57691	88.0889		2.57591	90.3286		10.5762	60.5233		3.57611	77.6746		11.5769	62.9389		4.57764	84.5787		12.5768	74.7012		5.57732	76.7352		13.5756	79.2522		6.57579	69.8311		14.5773	85.533		7.57718	80.5674		15.5769	69.6432
0.577978	182.718		8.57771	126.731		1.57896	97.85		9.57837	82.0735		2.57744	87.5043		10.5776	52.1936		3.57743	77.1229		11.578	68.331		4.57889	81.1401		12.5785	62.5423		5.57891	70.6363		13.5773	70.0369		6.57732	77.4151		14.579	88.7599		7.57864	76.5085		15.5785	73.2816
0.579019	174.88		8.57924	128.574		1.58028	97.7725		9.57934	78.6886		2.57924	99.3501		10.5794	65.0325		3.57923	83.9583		11.5791	74.1048		4.58063	72.7538		12.5796	70.5886		5.58002	62.9867		13.579	55.7605		6.57912	73.1534		14.5806	87.3582		7.58045	75.5333		15.5801	80.0306
0.580061	182.139		8.58021	135.099		1.58125	89.1029		9.58052	78.5931		2.58042	68.3399		10.5808	69.8371		3.58069	75.0203		11.5807	77.4002		4.58216	80.5078		12.5806	72.1424		5.58107	68.0626		13.5801	65.5276		6.58037	73.6186		14.5816	75.3693		7.5817	81.0923		15.5812	80.4988
0.581797	178.403		8.58132	133.897		1.5825	88.7122		9.58219	71.194		2.58133	74.0511		10.5817	68.3876		3.58159	80.138		11.5823	78.5216		4.58313	88.9865		12.582	74.3582		5.58252	78.4351		13.581	69.7118		6.58127	72.9625		14.5827	68.4115		7.5826	85.2765		15.5821	74.6505
0.583463	173.768		8.58306	134.127		1.58417	84.4952		9.58386	85.5867		2.58278	83.4901		10.583	66.64		3.58284	78.1339		11.5834	69.2257		4.58431	94.8408		12.5838	60.1057		5.58433	79.8189		13.5826	79.7234		6.58266	78.1905		14.5843	77.5165		7.58413	80.8866		15.5837	77.1408
0.584366	178.871		8.58465	133.572		1.58576	93.6509		9.5849	81.2832		2.58459	87.895		10.5849	63.3594		3.58465	76.3355		11.5844	61.6655		4.58605	85.9625		12.5851	63.8754		5.58558	62.9479		13.5844	72.1454		6.5844	70.1323		14.5861	85.5897		7.58593	77.6507		15.5855	82.0467
0.585269	187.618		8.58562	131.13		1.58674	101.128		9.58587	91.8436		2.58591	72.721		10.5862	71.874		3.58618	81.3876		11.5859	62.8137		4.58764	78.4321		12.586	70.6154		5.58655	77.8744		13.5856	69.2943		6.58579	74.4746		14.5871	83.0487		7.58711	67.6898		15.5867	77.2571
0.586866	191.629		8.58667	125.311		1.58785	87.8204		9.58754	85.1662		2.58681	74.0242		10.5871	68.5815		3.58708	79.8934		11.5878	72.2647		4.58848	85.7686		12.5874	73.5053		5.58794	71.9933		13.5865	71.531		6.58669	78.8526		14.5881	81.5367		7.58788	70.9256		15.5876	78.6051
0.588463	170.663		8.58847	140.476		1.58951	92.8934		9.5892	70.6989		2.5882	77.0125		10.5882	67.5824		3.58826	78.79		11.5889	64.4838		4.58952	88.0083		12.5892	71.7428		5.58975	63.5742		13.5881	69.2794		6.58801	78.3516		14.5898	79.0972		7.58926	69.0348		15.589	79.7622
0.589575	168.361		8.59014	135.556		1.59118	106.6		9.59032	68.6889		2.59001	78.5902		10.5899	76.0373		3.59006	83.7526		11.5898	66.5058		4.59112	93.4928		12.5906	78.1219		5.59107	74.9398		13.5899	69.0139		6.58982	84.5846		14.5915	82.4642		7.59093	75.8464		15.5909	79.0226
0.590547	177.18		8.59104	122.028		1.59222	104.691		9.59129	73.2578		2.5914	87.0361		10.5913	76.6189		3.59159	81.7604		11.5914	78.1398		4.59271	110.486		12.5915	64.9729		5.59197	78.9987		13.591	72.9476		6.5912	73.4934		14.5925	80.815		7.59225	69.333		15.5922	71.7666
0.592075	189.014		8.59194	142.567		1.59326	108.798		9.59289	81.7365		2.59216	77.3286		10.5924	73.4576		3.59249	78.3218		11.5932	82.9801		4.59382	86.1712		12.5928	63.5175		5.59336	74.3791		13.5917	75.2679		6.59204	60.6515		14.5934	79.5922		7.59322	74.06		15.5931	75.9299
0.593811	178.966		8.59347	140.807		1.59486	103.424		9.59469	73.5262		2.59334	63.6696		10.5935	68.3847		3.59347	72.2229		11.5943	83.338		4.59487	84.7009		12.5946	72.1185		5.59516	66.1628		13.5931	67.4214		6.59322	61.0988		14.5949	77.5642		7.59447	60.9348		15.5945	68.9453
0.59513	184.952		8.59514	132.215		1.5966	107.364		9.59573	86.4426		2.59508	67.49		10.5951	69.6611		3.59506	72.6494		11.5951	89.9856		4.59639	83.4156		12.5961	71.021		5.59655	74.8503		13.5948	68.8141		6.59495	72.7896		14.5966	75.2142		7.59621	65.793		15.5963	72.6106
0.596033	183.959		8.59625	124.771		1.59764	113.03		9.5965	86.0191		2.59646	71.188		10.5968	68.1133		3.59666	67.6093		11.5965	75.2858		4.59813	95.9622		12.5968	65.1131		5.59739	70.0667		13.5961	65.1459		6.59641	62.8793		14.5977	79.118		7.59781	78.3516		15.5977	78.6021
0.597422	176.416		8.59722	133.495		1.59847	99.8631		9.59795	81.0893		2.59744	66.5475		10.5978	68.3399		3.5977	77.4658		11.5982	70.3798		4.59938	89.3414		12.5979	67.2931		5.5985	73.6693		13.5971	70.5528		6.59738	66.479		14.5987	77.1467		7.59878	83.8808		15.5985	84.0568
0.599158	182.676		8.59875	138.445		1.6	100.764		9.59969	81.155		2.59862	65.453		10.5989	77.3406		3.59874	76.2461		11.5995	77.0364		4.60028	93.6062		12.5997	62.3753		5.60023	87.7936		13.5984	65.3755		6.5985	67.9403		14.6002	68.1341		7.59989	78.0265		15.5996	73.6634
0.600547	172.274		8.60049	143.193		1.60167	105.371		9.60087	79.3805		2.60028	72.7538		10.6004	76.9141		3.60034	69.4732		11.6005	78.3337		4.60174	98.4912		12.6011	57.4246		5.60169	75.9806		13.6001	53.5297		6.60016	76.9171		14.6019	85.5748		7.60163	65.5962		15.6014	65.969
0.60145	173.258		8.6018	129.349		1.60285	99.9376		9.60184	85.2944		2.60188	72.6613		10.6021	73.7976		3.60208	77.7014		11.6018	74.2807		4.60355	93.6598		12.6022	69.0974		5.60273	71.3819		13.6017	61.1495		6.60183	77.5165		14.6033	86.8601		7.60322	70.9345		15.6029	62.584
0.602769	193.827		8.60271	126.17		1.60375	98.4166		9.60316	86.4456		2.60292	72.1424		10.6033	74.8533		3.60333	69.6134		11.6035	72.2826		4.60487	94.0326		12.6033	72.4973		5.60384	77.5732		13.6026	71.701		6.60294	64.782		14.6042	82.9682		7.60419	77.5941		15.6039	68.3787
0.604575	206.287		8.60403	140.005		1.60521	103.165		9.60497	82.154		2.60396	73.4814		10.6042	73.9914		3.60423	74.5968		11.605	69.0885		4.6057	89.8395		12.6049	66.3209		5.60551	74.7668		13.6037	74.6714		6.60391	70.2993		14.6054	73.1474		7.60531	65.6021		15.605	68.6262
0.605964	198.277		8.60583	153.336		1.60695	114.125		9.60636	79.5535		2.60563	80.0634		10.6058	72.4257		3.60569	80.4243		11.6059	78.3695		4.60709	97.2237		12.6065	64.9908		5.60725	74.3046		13.6055	69.0527		6.60551	71.6652		14.6072	70.007		7.60704	67.651		15.6067	84.698
0.606797	185.808		8.60729	154.693		1.60833	107.841		9.60733	76.0403		2.60737	72.9685		10.6076	73.9079		3.60749	76.4876		11.6071	85.7448		4.60896	83.6661		12.6077	66.8637		5.60836	72.0887		13.6071	76.3176		6.60725	74.4626		14.6087	80.0038		7.60871	78.0772		15.6084	92.4967
0.607977	186.422		8.60819	143.217		1.60924	94.5605		9.60851	84.6413		2.60848	74.0362		10.6087	76.7262		3.60874	71.0359		11.6088	78.9003		4.61028	80.5346		12.6086	70.5677		5.60933	77.9788		13.6081	73.4516		6.60843	68.0715		14.6096	83.1293		7.60961	78.3784		15.6094	83.4096
0.609644	198.396		8.60944	128.783		1.61049	91.5573		9.61032	86.4426		2.60945	73.1623		10.6096	65.0176		3.60965	77.7432		11.6104	67.2275		4.61098	97.9693		12.6102	68.9274		5.61086	76.8097		13.6092	69.9891		6.60933	61.3822		14.6109	79.467		7.61051	76.3147		15.6105	81.9483
0.611102	200.463		8.61132	126.382		1.61229	106.991		9.61184	92.1538		2.61105	72.5122		10.611	64.0871		3.61104	82.1093		11.6114	65.0802		4.6123	100.695		12.612	76.1327		5.61259	73.4158		13.6109	76.0999		6.61093	69.9355		14.6127	72.4347		7.61211	63.9201		15.6121	78.0832
0.612144	178.745		8.61271	132.952		1.61375	91.1219		9.61275	77.7402		2.61285	79.0554		10.6126	74.063		3.61291	92.2224		11.6125	77.2123		4.61403	101.444		12.6131	64.8745		5.61377	76.7024		13.6126	61.7997		6.61266	82.4224		14.6142	71.6413		7.61371	65.5962		15.6138	70.3888
0.613255	174.985		8.61347	122.418		1.61465	95.4403		9.61393	66.7742		2.6139	70.5946		10.6139	74.6505		3.61416	92.2224		11.6142	76.8395		4.61542	83.2814		12.6141	58.9009		5.61468	75.7778		13.6135	72.4287		6.61377	84.9872		14.615	84.185		7.61489	64.3883		15.6149	67.0933
0.614922	176.375		8.61465	131.905		1.6159	102.717		9.61573	61.2987		2.61466	77.6418		10.6149	74.1584		3.61493	78.4172		11.6159	66.5386		4.61639	74.224		12.6156	62.6198		5.61627	74.6595		13.6144	68.504		6.61461	74.5253		14.6161	96.0546		7.61586	70.0786		15.6158	78.3963
0.616589	178.027		8.61639	159.092		1.61778	99.8929		9.61733	63.7621		2.61612	76.5771		10.6162	68.9692		3.61618	83.3857		11.6168	62.6258		4.61757	96.9911		12.6174	71.7159		5.61808	69.8848		13.616	73.1355		6.61607	58.4863		14.6177	97.8172		7.61732	70.9316		15.6174	66.7325
0.6177	176.082		8.61785	143.253		1.61924	97.4921		9.61816	74.063		2.61785	69.846		10.618	64.2213		3.61791	85.4346		11.6178	71.0151		4.61924	102.171		12.6186	76.2997		5.61919	66.7861		13.6176	72.8641		6.6178	61.2987		14.6193	87.9934		7.61913	76.0701		15.6192	67.2782
0.618672	166.804		8.61882	147.491		1.62007	90.3405		9.61914	78.9033		2.61903	75.0621		10.6194	69.1004		3.6193	88.1783		11.6193	77.8088		4.62084	77.3674		12.6194	64.3138		5.62002	71.3521		13.6187	70.9852		6.61905	65.3129		14.6203	89.3355		7.62038	70.9196		15.6203	68.9036
0.620269	160.395		8.61993	139.868		1.62111	99.4515		9.6208	82.9831		2.62001	75.0263		10.6204	71.3789		3.62027	90.7729		11.6209	66.4014		4.62188	87.895		12.6208	64.4897		5.62141	67.5615		13.6197	67.311		6.62002	77.4867		14.6213	76.2282		7.62128	80.2155		15.6212	73.2339
0.622005	161.88		8.6216	138.198		1.62278	101.793		9.62233	72.5927		2.6214	84.1224		10.6216	63.5742		3.62145	83.3768		11.6221	51.8029		4.62292	95.0287		12.6224	70.3649		5.62308	63.0493		13.6212	69.5597		6.62134	72.3392		14.623	76.8008		7.6226	83.9464		15.6226	77.6418
0.623116	175.638		8.62326	145.275		1.62438	100.114		9.62344	75.1128		2.62313	79.1479		10.6233	63.6994		3.62319	81.2504		11.623	56.8669		4.62459	92.0076		12.6238	68.9513		5.6244	71.361		13.623	78.3128		6.62315	60.1534		14.6247	79.9829		7.6244	77.782		15.6242	67.484
0.624019	178.411		8.62437	131.884		1.62542	105.151		9.62448	86.5738		2.62452	79.6549		10.6249	71.3401		3.62479	79.0733		11.6246	68.0715		4.62632	85.1304		12.6247	61.2748		5.6253	67.317		13.6243	93.9849		6.62454	58.54		14.6259	84.856		7.62586	72.4406		15.6255	69.2913
0.625616	183.544		8.62535	130.414		1.62646	98.6731		9.62601	83.7198		2.62549	78.8794		10.6258	77.2302		3.62583	65.8706		11.6263	70.5558		4.62744	86.4247		12.626	64.0215		5.62662	71.4177		13.6252	73.049		6.62551	69.8579		14.6268	82.4046		7.62676	69.8609		15.6264	77.2422
0.627422	178.453		8.62687	130.667		1.62806	91.6557		9.62775	79.9262		2.62674	84.3818		10.627	81.999		3.62687	73.8393		11.6276	69.333		4.62841	85.9118		12.6277	69.512		5.62843	75.9568		13.6265	64.6687		6.62669	67.4572		14.6284	86.4009		7.62808	63.0433		15.6278	70.8868
0.628533	176.798		8.62861	132.09		1.62979	98.4823		9.629	84.4952		2.62848	80.0813		10.6287	76.0075		3.62854	77.5702		11.6285	80.7225		4.63001	90.7968		12.6292	67.2514		5.62989	80.7225		13.6283	70.1412		6.6285	73.7886		14.6302	90.4598		7.62989	70.9763		15.6296	68.322
0.629366	177.075		8.62979	146.402		1.6309	86.0728		9.6299	81.3786		2.63001	72.5867		10.6303	76.6159		3.6302	85.1334		11.6299	69.4583		4.63174	91.8347		12.6302	72.208		5.63086	72.4436		13.6297	76.3952		6.63002	68.1878		14.6313	91.8943		7.63135	73.4307		15.631	73.55
0.630755	179.062		8.63076	133.176		1.63188	87.394		9.63136	84.525		2.63098	75.9359		10.6312	66.0734		3.63131	71.7875		11.6317	60.1743		4.63278	86.7617		12.6313	85.5211		5.63204	72.1394		13.6306	74.1614		6.631	71.8203		14.6322	86.204		7.63211	74.6207		15.632	84.7308
0.632491	181.251		8.63229	125.246		1.63333	91.608		9.63316	81.0506		2.63216	75.2649		10.6322	62.7749		3.63229	76.8276		11.633	58.7965		4.63369	89.4935		12.6331	74.3732		5.63377	77.9549		13.6319	71.698		6.63218	78.2174		14.6338	96.0129		7.63322	65.9511		15.6332	77.4062
0.633741	164.83		8.6341	134.712		1.63514	85.7239		9.63441	80.6957		2.63396	83.2038		10.6338	74.0958		3.63395	78.7602		11.6339	63.0672		4.63514	92.0762		12.6347	68.0178		5.6353	66.0465		13.6338	71.2447		6.63391	83.2933		14.6356	94.9989		7.63496	77.2809		15.6349	77.0155
0.634714	173.78		8.63528	130.119		1.63632	102.839		9.63532	79.1419		2.63549	82.9533		10.6354	75.1694		3.63569	80.0068		11.6353	68.4652		4.63681	86.8601		12.6357	74.8265		5.63627	68.2266		13.6352	80.0008		6.63558	87.385		14.6368	97.9872		7.63649	67.0188		15.6364	76.7113
0.636033	184.066		8.63604	127.351		1.63722	104.879		9.63677	77.776		2.63633	83.6989		10.6365	82.1749		3.63673	78.447		11.6371	73.8006		4.63806	84.7725		12.6368	64.5643		5.63739	73.3025		13.636	77.5523		6.63641	76.9678		14.6375	95.5447		7.63746	62.3216		15.6374	80.0575
0.637769	180.633		8.63743	136.012		1.63875	102.92		9.63858	73.0102		2.63737	84.0597		10.6375	66.9054		3.63756	72.9923		11.6385	70.5856		4.63896	84.4952		12.6385	71.7636		5.63919	80.645		13.6371	80.4153		6.63739	71.3073		14.6388	101.846		7.6385	72.9685		15.6385	76.4459
0.639227	184.701		8.6391	128.228		1.64056	97.1253		9.63983	85.6732		2.63903	86.2756		10.639	73.0281		3.63902	72.8492		11.6393	72.1931		4.64035	80.6599		12.6402	78.45		5.64079	69.9355		13.6388	70.8361		6.63905	72.7955		14.6406	85.6523		7.64024	74.5461		15.6403	78.1697
0.6402	178.781		8.64042	117.593		1.64181	93.8507		9.64066	75.405		2.64063	81.3637		10.6408	74.8354		3.64076	75.3633		11.6405	66.303		4.64216	88.2201		12.6411	71.6264		5.64169	80.1917		13.6403	73.2011		6.64065	75.3961		14.6419	74.9607		7.6419	77.943		15.6419	70.1293
0.64138	200.487		8.64139	119.594		1.64257	92.7055		9.64191	70.8212		2.64167	78.5246		10.6421	91.3098		3.64194	85.2318		11.6421	66.9203		4.64355	83.5259		12.642	70.4842		5.64266	68.8439		13.6412	74.1018		6.64169	69.8609		14.6428	97.1223		7.64295	75.7271		15.6428	70.0965
0.643116	200.836		8.64271	134.813		1.64389	88.572		9.64358	76.5085		2.64271	77.3286		10.643	76.8753		3.64284	88.745		11.6436	68.9006		4.64445	77.779		12.6436	68.2862		5.64426	64.117		13.6424	71.8143		6.64273	69.9325		14.6441	97.3311		7.64392	79.6459		15.6438	80.2722
0.644644	187.719		8.64444	149.459		1.64563	95.1629		9.64497	77.3346		2.64424	85.2914		10.6444	68.7336		3.6443	80.5585		11.6446	71.5191		4.6457	89.5532		12.6452	63.261		5.64586	65.1906		13.6441	68.665		6.64426	66.5804		14.6459	80.2871		7.64551	84.2804		15.6454	84.1313
0.645616	178.089		8.64597	144.926		1.64695	87.8055		9.64594	80.0515		2.64598	76.3147		10.6461	73.6992		3.64604	76.7381		11.6457	85.5897		4.64751	93.1349		12.6463	77.3585		5.64697	76.4906		13.6458	63.4161		6.646	65.1041		14.6474	83.8033		7.64725	79.2761		15.647	81.7514
0.646728	179.592		8.64687	134.303		1.64792	93.967		9.64719	78.7065		2.64716	80.0366		10.6475	63.9768		3.64743	74.737		11.6474	73.4874		4.64903	84.021		12.6473	66.6519		5.64794	63.5384		13.6468	57.6751		6.64725	73.9825		14.6484	76.592		7.64843	70.1293		15.6481	85.4674
0.648464	190.532		8.64806	133.539		1.64917	111.831		9.64886	78.3456		2.64813	87.0689		10.6484	65.2502		3.64833	79.0673		11.6491	71.6921		4.64994	95.0049		12.6488	61.1495		5.64947	61.8951		13.6478	67.3319		6.64815	75.9269		14.6495	84.7009		7.6494	75.5422		15.6491	78.4947
0.65013	189.184		8.64979	144.076		1.6509	95.2673		9.65046	81.2832		2.64959	71.0091		10.6497	84.2834		3.64958	70.4126		11.6501	70.4514		4.65119	87.2359		12.6506	65.1131		5.65127	61.2181		13.6494	72.888		6.64961	64.3436		14.6512	87.7787		7.65093	82.7416		15.6506	79.8129
0.651033	173.58		8.65139	130.817		1.65243	79.6996		9.6515	86.8273		2.6514	79.5922		10.6516	77.3137		3.65138	62.587		11.6512	70.517		4.65299	87.3015		12.6519	66.7056		5.65259	69.8371		13.6512	74.8772		6.65141	72.5957		14.6529	80.2125		7.65274	76.4966		15.6524	75.9777
0.652005	180.419		8.65236	129.916		1.6534	92.6429		9.65254	79.5654		2.65265	76.082		10.6529	94.2265		3.65291	64.8506		11.6527	82.6103		4.65445	82.2495		12.6528	73.1862		5.6535	70.7765		13.6523	67.9164		6.65273	76.2013		14.6539	88.5153		7.65385	66.7175		15.6537	68.2982
0.653602	180.428		8.65347	137.795		1.65451	95.494		9.6542	81.3786		2.65355	64.7253		10.6537	85.4048		3.65381	77.9549		11.6544	81.2802		4.65528	82.5716		12.6541	72.876		5.65489	68.0805		13.6533	73.9377		6.65364	81.7544		14.655	90.1258		7.65468	66.0734		15.6546	70.4276
0.6552	178.632		8.65521	139.838		1.65625	92.455		9.65587	77.1467		2.65494	80.0127		10.6549	66.3567		3.65499	90.4986		11.6556	59.73		4.65632	80.311		12.6559	79.5057		5.65669	67.9522		13.6548	74.4835		6.65502	73.3144		14.6566	99.1533		7.65607	75.59		15.656	68.2266
0.656241	179.825		8.65687	135.553		1.65785	91.2531		9.65691	73.1862		2.65681	79.5892		10.6567	65.3934		3.65687	73.5888		11.6565	64.6866		4.65799	98.7656		12.6573	67.9164		5.65801	67.3766		13.6566	70.7079		6.65683	59.5898		14.6583	85.4853		7.65774	74.2509		15.6578	70.8391
0.657283	178.34		8.65771	136.969		1.65889	83.5706		9.65796	76.0492		2.65806	68.6411		10.6581	67.2424		3.65833	71.7606		11.6581	66.7951		4.65959	104.838		12.6582	62.1158		5.65891	69.7506		13.6577	66.9293		6.65815	60.4487		14.6593	78.8735		7.65906	81.4383		15.6592	74.0779
0.658811	173.932		8.65868	151.09		1.65993	83.2873		9.65962	73.5649		2.65883	67.7375		10.659	67.4661		3.65916	76.9052		11.6599	59.9357		4.66056	93.2423		12.6595	75.1903		5.6603	78.8079		13.6585	70.9614		6.65898	82.5209		14.6602	84.7278		7.66003	67.138		15.66	65.8885
0.660616	174.406		8.66028	144.881		1.6616	87.1345		9.66129	83.5468		2.66015	79.1658		10.6602	67.9641		3.6602	72.1454		11.661	72.6434		4.6616	83.0845		12.6614	73.7141		5.66211	82.9563		13.6599	85.0767		6.66016	76.6218		14.6617	80.3497		7.66135	71.033		15.6614	67.0337
0.661797	168.791		8.66187	131.473		1.66333	88.5302		9.66233	67.8926		2.66181	74.8116		10.6619	82.6938		3.66187	71.2865		11.6618	76.8664		4.6632	83.9076		12.6628	66.7444		5.6635	67.5496		13.6616	83.3291		6.6619	67.9522		14.6634	92.792		7.66308	81.4025		15.6633	69.6372
0.6627	188.823		8.66299	137.703		1.66424	81.0357		9.66316	76.1745		2.6632	70.3918		10.6635	87.5819		3.6634	76.7024		11.6632	75.2201		4.66494	85.2557		12.6636	87.5073		5.66426	68.5218		13.6629	75.0173		6.66329	69.7714		14.6645	94.3309		7.66461	74.7638		15.6646	64.8476
0.664158	186.658		8.66396	133.519		1.66514	84.1731		9.66469	69.7028		2.66417	60.5143		10.6646	81.2892		3.66444	81.3071		11.6649	69.6671		4.66619	90.8386		12.6647	78.0325		5.66551	57.8392		13.6638	66.3626		6.66426	76.4071		14.6654	95.0436		7.66551	76.7202		15.6653	75.3752
0.665964	191.367		8.66549	124.774		1.66667	90.6626		9.66636	73.4964		2.66542	58.1135		10.6656	74.57		3.66555	77.5523		11.6662	64.7015		4.66716	92.5623		12.6664	77.0423		5.66718	74.5014		13.6651	75.0501		6.66544	63.0135		14.667	90.8624		7.66669	72.721		15.6666	63.6249
0.667283	196.63		8.66729	112.189		1.66833	98.5479		9.66754	77.2213		2.66709	64.9699		10.6672	76.8246		3.66715	71.0658		11.6671	70.8898		4.66862	98.0409		12.6679	83.7884		5.66864	71.5489		13.6669	56.682		6.66718	72.1692		14.6687	88.7211		7.66843	74.6088		15.6683	76.6517
0.668186	195.566		8.66854	123.137		1.66951	101.745		9.66851	86.216		2.66862	76.3534		10.6689	75.0919		3.66888	79.9919		11.6684	72.378		4.67035	84.4743		12.6689	76.4369		5.66961	65.5276		13.6684	59.4198		6.66877	75.4438		14.67	85.3779		7.67003	82.2823		15.6698	78.2174
0.669575	171.042		8.66944	142.045		1.67049	99.371		9.6699	86.6275		2.66966	75.59		10.6701	67.0545		3.66999	83.341		11.6703	75.1575		4.67167	83.3828		12.67	70.35		5.67079	66.6788		13.6693	72.9685		6.66982	75.2112		14.6709	79.4133		7.671	75.8941		15.6707	80.6301
0.67138	186.705		8.67083	128.675		1.67195	98.357		9.67164	80.8627		2.67077	76.0999		10.671	69.9086		3.67097	73.8185		11.6717	69.7178		4.67257	96.6809		12.6717	67.8627		5.67246	69.8013		13.6705	83.2724		6.67086	72.0678		14.6723	94.1221		7.67211	74.8503		15.6719	78.4172
0.6727	185.143		8.67264	138.961		1.67368	88.2917		9.67303	77.4479		2.67244	80.6301		10.6726	70.35		3.67243	76.6308		11.6726	81.6381		4.67403	91.095		12.6733	69.4404		5.67412	68.334		13.6723	80.469		6.67245	60.6008		14.6741	89.4488		7.67385	70.5081		15.6737	71.0091
0.673464	181.853		8.67396	161.475		1.675	98.3152		9.674	68.9185		2.6741	74.0391		10.6744	66.6221		3.67423	69.9146		11.6738	78.5037		4.67584	74.567		12.6744	75.1307		5.67516	76.8067		13.6739	72.0738		6.67419	57.8869		14.6756	84.6055		7.67551	69.5955		15.6753	69.9713
0.674714	189.876		8.67486	155.406		1.6759	93.3258		9.67525	86.9198		2.67515	70.8481		10.6755	67.0695		3.67548	74.91		11.6755	77.4121		4.67709	93.7791		12.6754	79.4014		5.67621	82.8937		13.6749	63.2044		6.67523	61.0601		14.6765	90.7729		7.67635	69.3539		15.6763	67.5615
0.67638	177.078		8.67625	121.461		1.67729	82.3181		9.67705	85.2378		2.67619	81.1848		10.6762	63.1865		3.67638	81.8976		11.6771	84.0001		4.67785	93.29		12.677	84.9037		5.6778	80.4362		13.676	75.578		6.6762	76.3743		14.6777	93.3318		7.67732	65.1936		15.6773	72.6762
0.677839	168.972		8.67805	123.832		1.6791	93.3855		9.67851	80.299		2.67785	81.0715		10.6777	66.2732		3.67784	72.7508		11.6781	84.4445		4.67917	99.2696		12.6788	87.9248		5.67954	73.723		13.6777	78.5246		6.67787	74.4537		14.6795	86.6752		7.67892	71.8113		15.6789	82.0169
0.678811	187.958		8.67944	132.129		1.68049	90.3137		9.67941	92.3178		2.67952	82.3539		10.6794	68.2743		3.67965	66.6519		11.6792	85.5181		4.68084	88.563		12.6799	68.5904		5.68065	64.451		13.6793	82.0079		6.67961	64.4838		14.681	90.4538		7.68051	76.5622		15.6807	81.2832
0.679991	182.232		8.68021	131.92		1.68139	87.7161		9.68066	88.0978		2.68056	86.5172		10.6806	62.4379		3.6809	76.7053		11.6809	70.1442		4.68216	85.1155		12.6809	68.3161		5.68162	69.4046		13.6802	71.8829		6.68065	57.7855		14.6818	89.759		7.68163	69.6879		15.6818	87.2836
0.681658	173.72		8.68139	141.38		1.68264	93.3199		9.68247	65.4322		2.68146	80.2752		10.6816	64.8208		3.68173	81.8946		11.6826	71.9366		4.68313	78.0563		12.6824	79.6191		5.68322	76.0671		13.6812	64.0066		6.68148	66.5774		14.6829	90.5344		7.6826	66.9144		15.6828	76.7531
0.683325	187.23		8.68313	131.786		1.68451	95.3598		9.68393	83.168		2.68292	74.0779		10.683	75.7361		3.68298	75.2351		11.6835	75.584		4.68438	84.1522		12.6842	86.0549		5.68496	79.0822		13.6828	66.6072		6.68294	70.353		14.6846	82.497		7.6842	70.6333		15.6844	67.0724
0.684366	179.312		8.68458	132.338		1.68597	84.8918		9.68476	85.19		2.68466	76.3832		10.6847	71.1642		3.68472	77.5225		11.6845	75.2798		4.68612	86.3263		12.6853	67.6331		5.68607	86.0967		13.6844	65.5276		6.68468	73.9228		14.6861	73.0073		7.68593	73.9735		15.6861	70.6542
0.685339	196.225		8.68549	129.588		1.68674	82.7982		9.68587	71.9634		2.68584	91.1815		10.6861	68.0119		3.68604	76.9499		11.6861	71.5549		4.68771	75.5005		12.6861	63.5473		5.68683	78.8138		13.6855	73.5113		6.68586	65.799		14.6871	74.3195		7.68718	71.2298		15.6871	75.244
0.687005	178.981		8.68667	151.398		1.68785	82.9682		9.68754	77.9997		2.68674	82.0586		10.6871	66.2851		3.68694	74.3672		11.6877	58.6832		4.68876	89.3713		12.6875	57.7676		5.68829	71.03		13.6865	73.6842		6.68683	60.899		14.6882	79.0763		7.68808	67.0814		15.688	66.9203
0.688672	180.788		8.68833	154.109		1.68958	84.2775		9.68907	79.291		2.6882	84.6831		10.6883	63.8128		3.68819	85.8551		11.6887	55.7247		4.6898	99.1592		12.6893	70.1174		5.69002	77.3465		13.688	69.2704		6.68822	62.5095		14.6899	86.8065		7.68947	65.9958		15.6894	59.387
0.689783	191.146		8.69	145.221		1.69104	78.0533		9.69004	84.9962		2.68994	74.1465		10.6901	65.6976		3.68993	80.8001		11.6898	69.9653		4.69146	100.346		12.6904	75.7719		5.69121	76.3743		13.6897	62.414		6.68996	73.4755		14.6916	85.7835		7.69128	69.1511		15.6912	73.7469
0.690755	187.612		8.69104	132.842		1.69208	81.9095		9.69108	75.1814		2.69133	70.4067		10.6916	66.8428		3.69152	66.6937		11.6913	72.2229		4.6932	82.3419		12.6914	71.4535		5.69218	70.2456		13.691	71.021		6.69134	83.0577		14.6927	88.5153		7.6926	66.7951		15.6923	75.4229
0.692353	181.817		8.69201	120.817		1.6932	82.5865		9.69268	71.2477		2.69223	71.4475		10.6925	77.3436		3.69249	72.2229		11.693	70.6124		4.69417	81.8677		12.6928	75.0591		5.69357	69.4792		13.6919	72.9238		6.69232	73.4337		14.6936	92.5981		7.6935	66.1777		15.6933	72.1513
0.694089	172.882		8.69361	136.131		1.69479	83.9971		9.69441	79.0166		2.69348	67.9731		10.6937	65.5634		3.69361	82.1451		11.6943	67.7435		4.69521	89.9528		12.6945	72.0052		5.69537	74.6446		13.6933	70.4186		6.69357	66.9919		14.6952	79.9322		7.69489	76.9081		15.6947	71.4624
0.69513	182.366		8.69535	149.328		1.69646	91.4708		9.69559	76.8485		2.69528	64.2243		10.6954	69.7028		3.69527	78.2621		11.6952	81.2832		4.69695	87.4536		12.696	67.6182		5.69676	83.7734		13.6951	63.6547		6.69537	78.4977		14.697	87.7041		7.6967	87.4566		15.6965	79.6071
0.695964	177.132		8.69653	136.408		1.69757	86.1026		9.69657	73.7051		2.69674	71.2059		10.697	77.2064		3.69701	78.0235		11.6966	77.2183		4.69862	82.2047		12.6969	66.3119		5.69766	79.8666		13.6965	59.3035		6.6969	82.6342		14.6981	82.8668		7.69808	81.4979		15.6979	83.7048
0.697422	172.826		8.69743	127.801		1.69854	103.367		9.69802	85.2139		2.69765	70.8391		10.6978	71.7368		3.69805	79.6101		11.6984	66.9442		4.69959	85.0708		12.6981	64.108		5.69891	68.0506		13.6974	76.1655		6.6978	83.687		14.6991	83.5349		7.69892	72.0141		15.6988	85.9356
0.699088	171.519		8.69903	130.775		1.70007	97.7814		9.69983	73.2399		2.6989	79.2015		10.6988	69.7685		3.69902	77.4628		11.6997	56.6164		4.70049	96.833		12.6999	56.3331		5.70065	77.5911		13.6987	81.8021		6.69898	69.0467		14.7006	80.3587		7.7001	70.7675		15.7001	79.628
0.700269	180.091		8.70083	144.294		1.70181	97.856		9.70108	71.7994		2.7007	70.4305		10.7005	71.6622		3.70076	77.779		11.7005	65.6051		4.70202	87.561		12.7014	63.2849		5.70218	84.9634		13.7006	78.119		6.70079	71.3491		14.7024	83.3768		7.70176	61.1764		15.7019	80.5346
0.701241	174.445		8.70194	149.534		1.70299	90.2958		9.70198	80.1589		2.70216	69.2883		10.702	61.0422		3.70243	77.3644		11.7019	58.0211		4.70362	100.304		12.7024	72.7955		5.70315	85.706		13.7019	63.3803		6.70238	71.7636		14.7036	85.3242		7.70322	67.8687		15.7034	79.0315
0.70263	169.02		8.70271	158.463		1.70396	83.7973		9.70344	82.3181		2.70299	75.4021		10.7031	72.7448		3.7034	72.0589		11.7038	62.1128		4.7048	90.758		12.7035	73.8453		5.70433	78.9868		13.7027	72.0589		6.70322	56.8938		14.7043	74.397		7.7042	76.8455		15.7043	74.8026
0.704436	172.864		8.70417	149.933		1.70549	95.6998		9.70525	76.9111		2.70403	77.3286		10.7042	71.0061		3.7043	80.1499		11.7051	71.7964		4.70577	73.392		12.7052	68.495		5.70607	77.2422		13.7039	71.7547		6.70426	57.0011		14.7057	83.4066		7.70538	77.1497		15.7055	82.0139
0.705825	184.439		8.7059	151.89		1.70729	96.8629		9.7065	75.2022		2.7057	74.5074		10.7057	73.2339		3.70583	77.2392		11.7059	74.2062		4.70723	83.1054		12.7068	61.746		5.70766	77.7939		13.7056	69.5985		6.70593	68.7694		14.7074	91.1129		7.70704	72.1752		15.7073	70.7914
0.706797	195.617		8.70708	148.019		1.7084	94.5814		9.70726	77.4062		2.7073	76.261		10.7074	77.6627		3.70743	76.2073		11.7071	76.9499		4.70903	85.7597		12.7077	63.3266		5.70857	78.96		13.707	70.7377		6.70745	63.1477		14.7087	90.0572		7.70871	78.2711		15.7088	61.7609
0.707978	191.784		8.70806	148.49		1.70924	90.8893		9.70858	83.0965		2.70827	74.5074		10.7087	65.8885		3.70861	66.0346		11.7088	73.0729		4.71035	88.6257		12.7087	71.5071		5.70954	70.8958		13.708	74.8265		6.70857	62.4767		14.7096	86.3979		7.70975	71.6115		15.7096	72.3362
0.709783	190.991		8.70944	148.397		1.71063	92.8964		9.71032	83.341		2.70938	69.2197		10.7096	64.7582		3.70958	79.5356		11.7103	78.5753		4.71126	96.6988		12.7104	69.2853		5.71121	76.6069		13.7092	70.9882		6.70961	65.7453		14.7109	94.7752		7.71072	64.6836		15.7107	79.7354
0.711311	183.69		8.71125	142.853		1.71229	97.2655		9.71164	87.1196		2.71098	75.6496		10.711	68.331		3.71104	82.5477		11.7112	70.4425		4.71257	92.4669		12.7119	65.119		5.71273	79.7473		13.7108	72.6315		6.7112	72.5569		14.7127	87.722		7.71232	71.364		15.7123	74.9338
0.712214	165.734		8.71264	149.933		1.71354	84.346		9.71261	78.6409		2.71265	76.765		10.7128	80.2066		3.71277	76.7411		11.7124	72.0768		4.71438	90.3912		12.713	73.9527		5.71384	82.5268		13.7125	75.2887		6.71294	81.2027		14.7143	86.7438		7.71406	76.2043		15.7139	73.0102
0.713394	171.495		8.71361	153.542		1.71451	75.1933		9.71379	76.6964		2.71383	65.0802		10.7141	65.0713		3.71416	67.5526		11.7141	69.6164		4.71584	87.5222		12.714	76.6755		5.71489	80.6629		13.7135	79.965		6.71412	80.2692		14.7152	96.8718		7.71524	75.8405		15.715	80.0068
0.7152	178.054		8.71479	151.845		1.71583	100.501		9.71559	75.6556		2.7148	75.0144		10.715	65.7692		3.71506	75.2738		11.7157	72.0827		4.71674	90.5851		12.7156	62.7749		5.71641	81.4293		13.7145	74.7072		6.71509	65.3546		14.7163	86.8959		7.71614	79.962		15.716	84.2894
0.716727	165.704		8.7166	162.886		1.71757	87.8175		9.71712	80.3646		2.71626	72.1364		10.7164	75.9806		3.71638	75.8405		11.7168	76.2938		4.71799	82.6014		12.7173	71.5966		5.71815	87.4685		13.7162	82.6074		6.71655	69.1958		14.7181	79.2552		7.71774	65.9093		15.7176	82.2286
0.717561	155.588		8.71812	167.386		1.71903	85.5688		9.71809	77.3197		2.71806	71.5131		10.7183	74.3374		3.71819	85.5449		11.7178	77.275		4.7198	81.2802		12.7185	78.113		5.7194	68.3906		13.7179	79.4014		6.71829	77.0036		14.7197	75.4438		7.71954	68.8588		15.7193	74.564
0.718603	175.283		8.7191	153.047		1.72	77.4569		9.7192	82.4672		2.71924	82.7923		10.7195	69.9862		3.71965	82.2465		11.7194	66.142		4.72126	82.1958		12.7194	61.6923		5.7203	78.0742		13.719	72.1155		6.71961	80.7643		14.7206	80.1768		7.72065	70.8093		15.7205	76.8038
0.720269	187.77		8.72021	157.41		1.72118	96.5557		9.72094	75.7927		2.72015	86.9615		10.7203	71.4117		3.72048	86.4844		11.7211	65.1608		4.72209	88.5929		12.7208	57.8272		5.72176	88.6018		13.72	61.8593		6.72051	72.7806		14.7218	86.2309		7.72149	71.8412		15.7214	72.8432
0.721797	179.431		8.72201	149.525		1.72292	81.6679		9.72254	73.6485		2.72167	75.8703		10.7215	72.545		3.7218	88.7211		11.7222	67.8985		4.7232	88.4587		12.7227	64.8446		5.72357	70.523		13.7216	58.2895		6.7219	77.1199		14.7235	88.572		7.72288	79.637		15.7229	74.0004
0.722839	182.056		8.72361	132.931		1.72451	69.2048		9.72358	75.1724		2.72348	73.6335		10.7233	66.0495		3.72361	83.2933		11.7232	74.4328		4.72487	102.204		12.724	74.4149		5.72489	64.0185		13.7234	71.0508		6.72377	60.2131		14.7252	80.4064		7.72461	80.2931		15.7247	73.2071
0.72388	199.21		8.72444	151.162		1.72549	91.1726		9.72462	91.7034		2.72473	66.9591		10.7246	67.1291		3.72506	84.5488		11.7248	69.1064		4.72633	92.2581		12.7248	82.7058		5.72572	62.1784		13.7244	78.3188		6.72502	67.7405		14.7261	75.8375		7.72586	83.5617		15.726	77.9579
0.725477	179.017		8.72542	162.229		1.72653	98.2616		9.72629	88.736		2.72549	69.9534		10.7256	64.5971		3.7259	84.3699		11.7266	78.8735		4.72737	86.6842		12.7263	70.8212		5.72711	71.4803		13.7252	68.6053		6.72579	72.5003		14.727	73.8095		7.72683	83.6064		15.7269	67.4154
0.727214	175.492		8.72708	151.326		1.72833	85.6225		9.72802	75.1307		2.72681	60.0312		10.7269	72.2915		3.72701	80.9223		11.7276	70.5677		4.72848	100.716		12.7281	63.1596		5.72898	75.4468		13.7267	74.4209		6.72704	81.0565		14.7286	87.6743		7.72822	88.2917		15.7283	66.8696
0.728394	169.241		8.72861	152.895		1.73	79.965		9.72893	78.8556		2.72855	71.707		10.7285	79.5356		3.72868	79.4103		11.7284	62.3514		4.73007	93.4869		12.7294	57.2815		5.7303	72.9118		13.7284	73.3502		6.72877	70.9047		14.7302	95.0735		7.72996	78.1637		15.7301	73.2011
0.729366	171.358		8.72972	149.623		1.73083	87.1584		9.72983	89.3653		2.72987	86.2995		10.7301	66.2284		3.73013	75.7212		11.7298	75.0412		4.73181	94.3786		12.7302	71.6354		5.73107	72.6196		13.7296	84.0061		6.73016	64.8267		14.7313	84.698		7.73142	66.6609		15.7314	78.2532
0.730825	172.533		8.73076	132.445		1.73181	82.1809		9.73136	86.0221		2.73077	93.3139		10.7312	65.6857		3.73118	68.5457		11.7316	72.8194		4.73292	88.8881		12.7314	77.6448		5.73232	77.7014		13.7306	75.5303		6.73114	77.1885		14.7323	88.402		7.73239	63.9231		15.7321	90.3017
0.732561	168.179		8.73229	135.18		1.7334	89.5592		9.73302	78.79		2.73209	93.299		10.7322	66.3746		3.73229	87.2478		11.7328	74.0093		4.73389	85.3839		12.7331	67.7554		5.73405	82.0705		13.7319	68.5934		6.73239	75.9389		14.7338	86.5738		7.73357	83.4126		15.7335	84.3222
0.73388	171.203		8.73403	155.015		1.735	84.6323		9.73421	79.3656		2.73383	68.1729		10.7339	61.7609		3.73388	87.382		11.7338	77.2899		4.73542	83.6929		12.7346	79.9859		5.73544	72.1931		13.7337	71.2954		6.73405	77.5404		14.7356	80.5943		7.73531	78.7244		15.7352	74.0391
0.734783	168.85		8.73521	140.733		1.73611	80.6659		9.73518	85.4853		2.73535	70.6005		10.7355	73.0222		3.73555	71.2417		11.7352	64.9848		4.73723	84.2953		12.7356	67.5973		5.73641	74.7877		13.7351	74.3046		6.73565	71.6771		14.7368	77.2034		7.73683	74.2062		15.7365	67.3677
0.736241	181.561		8.73618	146.841		1.73708	83.514		9.73664	83.9643		2.73633	78.5365		10.7367	76.6904		3.73666	78.0474		11.7369	64.4241		4.73841	83.3529		12.7367	64.8387		5.73759	91.1159		13.736	68.9125		6.73669	83.3828		14.7377	76.6576		7.73781	69.9414		15.7375	73.1683
0.738047	187.615		8.73764	125.356		1.73861	88.575		9.73844	72.721		2.73744	77.9997		10.7376	79.7175		3.7377	79.5505		11.7383	73.8483		4.73931	76.8216		12.7384	71.9038		5.73933	76.3952		13.7373	61.2748		6.7378	82.4016		14.7391	81.8349		7.73899	78.3814		15.7387	77.8356
0.739297	169.011		8.73938	130.939		1.74042	92.7622		9.73969	72.2229		2.73917	78.2949		10.7393	80.2811		3.73923	72.0738		11.7393	65.7155		4.74084	80.1648		12.74	75.7659		5.74093	64.6538		13.739	66.1926		6.7394	77.7551		14.7409	88.7688		7.74079	69.849		15.7405	66.7802
0.740061	173.183		8.74069	145.126		1.74167	92.1776		9.74059	94.3577		2.74077	79.8219		10.741	72.038		3.74097	79.1926		11.7405	62.9926		4.74264	81.4174		12.7411	75.5363		5.7419	79.9769		13.7406	63.3207		6.74107	73.1444		14.7423	81.2534		7.74239	60.4129		15.7421	67.5407
0.741311	173.38		8.74167	136.498		1.74257	85.6583		9.74191	88.5601		2.74181	84.1522		10.7421	64.6389		3.74222	86.7677		11.7423	58.7368		4.74382	96.1322		12.7421	80.4243		5.74301	71.525		13.7415	61.8951		6.74211	84.0627		14.7432	90.5642		7.74322	66.8279		15.743	64.0901
0.743047	180.997		8.74306	142.868		1.74396	69.8967		9.74372	72.0738		2.74285	77.1139		10.7429	64.4033		3.74312	74.2807		11.7438	63.1716		4.74459	89.1983		12.7438	75.0024		5.74468	70.8093		13.7427	65.295		6.74315	72.4675		14.7445	86.5142		7.74419	69.4583		15.7442	60.5561
0.744436	168.752		8.74486	133.012		1.74576	75.408		9.74518	80.0157		2.74452	76.094		10.7444	67.7494		3.74465	87.2449		11.7447	65.128		4.74598	83.168		12.7454	86.5142		5.74634	75.9955		13.7445	77.099		6.74482	78.9868		14.7464	81.9155		7.74586	69.5835		15.7458	76.8067
0.745408	172.861		8.74618	130.551		1.74708	77.4688		9.74608	79.9471		2.74626	70.6632		10.746	64.791		3.74645	83.8271		11.7459	69.2644		4.74764	85.6583		12.7465	79.0882		5.74746	74.0362		13.746	69.1481		6.74655	70.7317		14.7478	84.9574		7.74746	76.6755		15.7475	75.5721
0.746589	174.257		8.74694	140.593		1.74799	90.1377		9.74733	88.9836		2.74723	72.1275		10.7472	81.656		3.74763	75.5691		11.7477	68.996		4.74896	79.2821		12.7475	78.7423		5.74843	85.5002		13.7469	77.2153		6.74752	81.9155		14.7486	89.4906		7.7485	75.6228		15.7485	67.7673
0.748325	199.47		8.74819	138.818		1.74938	83.0637		9.7492	92.6101		2.74813	81.4293		10.7482	80.2096		3.7484	74.8861		11.7493	72.3362		4.74987	87.8801		12.7491	78.3247		5.75009	73.4516		13.7479	76.1655		6.74836	74.3612		14.7497	88.0203		7.74954	70.687		15.7496	67.6749
0.749853	192.103		8.74986	130.799		1.75125	84.6353		9.75066	79.5147		2.74966	80.9253		10.7496	73.6604		3.74979	81.5785		11.7501	72.6673		4.75119	88.8136		12.7509	77.7163		5.75176	75.2022		13.7495	81.6798		6.74989	69.1302		14.7514	88.3782		7.75107	74.1256		15.7512	70.5021
0.750894	167.821		8.75132	138.034		1.75257	76.3355		9.75143	80.475		2.75133	78.9719		10.7514	66.1032		3.75145	80.7166		11.7511	69.8997		4.75299	87.4805		12.752	62.4946		5.7528	73.4337		13.7511	70.4246		6.75155	74.1972		14.7529	93.1379		7.75288	65.0176		15.753	72.8253
0.752005	162.566		8.75229	131.127		1.7534	81.8379		9.75254	81.5755		2.75244	76.5383		10.7528	72.0827		3.75277	82.5328		11.7528	79.3507		4.75445	80.3855		12.7528	61.2092		5.75371	66.7444		13.7522	74.063		6.75273	86.8482		14.7538	97.2834		7.75406	78.2502		15.7539	71.4982
0.753672	179.53		8.75347	134.604		1.75451	83.5736		9.75427	94.2861		2.75341	79.4014		10.7537	72.3422		3.75374	69.4493		11.7543	71.7815		4.75542	92.3625		12.7543	62.42		5.75516	75.6735		13.7533	76.1238		6.7537	84.5846		14.755	85.6105		7.75496	90.594		15.7548	77.7581
0.755338	186.395		8.75521	124.983		1.75625	81.1609		9.75573	97.5279		2.75487	77.1497		10.7549	68.0775		3.75499	60.1922		11.7554	83.5349		4.75653	82.4672		12.7559	59.4526		5.75683	71.7428		13.7548	74.3523		6.75516	78.7184		14.7567	79.4193		7.75642	83.3828		15.7563	76.2997
0.75638	183.601		8.75681	131.025		1.75771	86.0997		9.7567	93.126		2.7566	76.1238		10.7567	69.172		3.7568	70.5916		11.7564	86.3144		4.75827	86.4456		12.7571	71.3372		5.75801	61.3702		13.7565	75.8703		6.75697	83.1621		14.7584	82.9801		7.75822	69.5985		15.758	86.5381
0.757352	175.301		8.75778	131.025		1.75875	80.2096		9.75782	86.4128		2.75792	71.2179		10.7582	66.4104		3.75826	85.1692		11.758	69.7178		4.75994	93.8954		12.7581	76.3266		5.75898	70.0667		13.7577	66.2702		6.75836	76.2401		14.7594	105.604		7.75954	79.8129		15.7592	82.2554
0.759019	181.883		8.75882	141.186		1.75986	76.4876		9.75941	82.9712		2.75883	70.9137		10.7591	65.8974		3.75923	76.8694		11.7598	67.6063		4.76098	99.7408		12.7595	77.6984		5.76037	73.0132		13.7586	73.4248		6.75926	72.4555		14.7604	97.8053		7.76044	74.0302		15.7601	78.793
0.760755	182.494		8.76056	139.57		1.76153	83.9017		9.76115	84.3222		2.76021	72.1692		10.7603	61.5372		3.76034	66.0256		11.7609	61.9935		4.76202	97.8888		12.7613	67.3975		5.76218	64.2005		13.7601	67.9373		6.76051	77.7939		14.762	90.8266		7.76183	74.7907		15.7616	80.0515
0.761797	177.063		8.76222	136.811		1.7632	83.7615		9.76226	89.4339		2.76202	75.4975		10.7621	73.9795		3.76208	60.8215		11.7618	68.0775		4.76369	93.9819		12.7627	72.7508		5.76357	59.5451		13.7619	64.5822		6.76232	68.1878		14.7638	77.7313		7.76371	71.874		15.7633	65.8914
0.76263	188.414		8.76326	134.798		1.76424	94.9691		9.76323	88.5094		2.76341	83.7108		10.7637	76.264		3.76374	72.2527		11.7633	68.6382		4.76535	88.2708		12.7636	70.7347		5.76447	66.9293		13.7632	70.4425		6.76377	79.5147		14.7649	77.7999		7.76503	68.6053		15.7647	60.4904
0.764158	182.476		8.76424	146.897		1.76521	96.7585		9.76476	70.4156		2.76431	83.1889		10.7645	76.425		3.76472	88.3543		11.7651	66.473		4.76632	89.0969		12.7648	71.2626		5.76579	75.077		13.7641	64.2541		6.76468	79.2761		14.7658	83.9792		7.76579	82.7117		15.7656	68.1878
0.765825	186.276		8.7659	138.72		1.76681	81.9453		9.76657	73.8274		2.76556	83.2664		10.7655	77.0036		3.76576	88.9418		11.7664	66.98		4.76723	90.1467		12.7665	80.1171		5.76752	79.0286		13.7655	66.1628		6.76593	66.9531		14.7675	94.3577		7.76704	89.1148		15.7669	68.8231
0.766936	193.991		8.76764	144.327		1.76854	88.3782		9.76775	72.9774		2.76737	79.7324		10.7672	66.8965		3.76749	83.6005		11.7673	67.5138		4.76876	93.1379		12.7681	77.3615		5.76905	78.2204		13.7674	83.9285		6.7678	71.9485		14.7693	84.1582		7.76871	75.2351		15.7687	69.0795
0.767908	180.952		8.76868	146.566		1.76972	90.8475		9.76865	72.5271		2.76883	81.492		10.7687	68.1371		3.76916	87.6266		11.7687	68.7276		4.77042	104.566		12.769	62.3126		5.76996	80.6539		13.7686	84.3699		6.76926	76.1655		14.7703	76.2997		7.77017	72.7985		15.7701	69.8221
0.769366	166.846		8.76951	136.253		1.77063	92.7622		9.77018	78.7452		2.76966	71.2686		10.7698	72.3183		3.77013	85.2407		11.7705	72.2289		4.77153	100.981		12.7702	63.7054		5.77121	72.3511		13.7694	79.8248		6.77009	71.1731		14.7711	84.7994		7.77114	76.4638		15.7711	78.951
0.771103	178.513		8.77104	142.97		1.77222	84.9902		9.77205	84.8322		2.77077	74.406		10.7708	75.9955		3.77104	69.6969		11.7718	65.3546		4.77251	87.9994		12.772	68.1133		5.77301	75.8703		13.7707	70.9703		6.7712	61.8206		14.7725	79.1956		7.77232	76.7978		15.7723	71.2417
0.772491	167.371		8.77271	161.991		1.77396	99.1652		9.77316	84.2745		2.77244	78.5514		10.7724	77.5672		3.77263	67.8031		11.7725	74.2598		4.77403	78.9868		12.7736	69.3599		5.77447	85.7925		13.7724	62.8167		6.77287	67.9791		14.7743	83.9494		7.77399	73.7976		15.7742	72.9566
0.773464	188.226		8.77389	140.697		1.77507	102.589		9.774	75.2828		2.77396	74.9577		10.7742	72.8194		3.77423	72.5301		11.7738	68.6739		4.77577	89.3772		12.7744	66.4044		5.7753	75.8971		13.7737	66.8637		6.7744	75.7361		14.7754	93.3586		7.77558	71.8054		15.7756	75.8375
0.774714	174.74		8.77486	127.366		1.7759	95.1868		9.77539	79.3656		2.77494	87.0779		10.7753	68.838		3.77534	81.8767		11.7755	78.0474		4.77709	81.6977		12.7754	63.8366		5.77634	74.0421		13.7747	69.4732		6.77544	66.0107		14.7764	86.3054		7.77663	59.9447		15.7764	76.3832
0.77645	160.371		8.77625	126.808		1.77729	98.9057		9.77705	82.8758		2.77605	78.1965		10.7762	64.0334		3.77631	77.9102		11.7769	82.1958		4.77799	86.3293		12.777	67.7912		5.77801	86.0728		13.776	65.3457		6.77648	60.234		14.7777	89.8246		7.77767	71.3521		15.7775	77.9549
0.777977	173.506		8.77806	133.265		1.77903	104.912		9.77837	70.2188		2.77771	74.3642		10.7778	77.6388		3.77784	83.4484		11.7779	62.5512		4.77931	84.6801		12.7786	61.3822		5.77961	80.3796		13.7776	59.1902		6.77815	71.194		14.7795	93.6718		7.77933	81.1848		15.7792	79.5714
0.77888	181.352		8.77944	132.287		1.78028	86.5917		9.77927	75.1426		2.77938	79.8755		10.7796	83.2664		3.77958	86.4247		11.7791	72.202		4.78112	79.5982		12.7797	66.6102		5.78058	66.6996		13.7792	71.0658		6.77989	71.4356		14.781	80.6957		7.781	80.8537		15.7807	68.8797
0.780061	190.436		8.78035	122.991		1.78125	90.6477		9.78059	75.1784		2.78049	74.1226		10.7808	70.0667		3.78083	72.715		11.7809	75.0501		4.78257	100.635		12.7807	69.7625		5.78169	64.6717		13.7802	68.3757		6.781	69.2018		14.7819	89.0253		7.78211	77.2839		15.7817	65.8765
0.781866	172.548		8.7816	119.218		1.78257	86.4903		9.78233	72.3034		2.78146	80.5794		10.7817	70.8182		3.7818	73.5888		11.7825	74.9577		4.78348	103.263		12.7823	60.7768		5.78329	65.7364		13.7813	74.9666		6.78197	64.6836		14.7831	88.1694		7.78308	76.9499		15.7828	72.3422
0.783394	181.03		8.7834	130.044		1.78438	76.1148		9.78386	86.1802		2.78299	80.2752		10.7832	65.3129		3.78312	70.9375		11.7834	75.59		4.7848	97.2834		12.784	63.0374		5.78502	70.52		13.783	78.0533		6.78343	74.0869		14.7849	86.1653		7.78475	75.1516		15.7844	85.8969
0.784227	189.971		8.78486	124.909		1.78576	91.6378		9.78476	95.3956		2.7848	80.8209		10.785	64.2512		3.78493	80.4213		11.7846	76.8276		4.7866	96.8957		12.7852	60.8453		5.78621	65.5664		13.7846	66.9591		6.78523	74.3851		14.7864	73.1623		7.78649	82.3986		15.7862	76.2997
0.785269	174.4		8.78583	142.051		1.78674	95.0257		9.78594	77.3436		2.78598	77.9191		10.7862	67.7107		3.78638	75.1038		11.7862	65.0713		4.78799	103.806		12.7861	60.8215		5.78718	60.6694		13.7858	63.5831		6.78648	77.3197		14.7874	86.1802		7.78746	77.9251		15.7873	66.9949
0.786936	183.317		8.78701	147.78		1.78792	86.8601		9.78768	82.3628		2.78688	83.7973		10.7869	66.9293		3.78722	78.1339		11.7879	57.2188		4.78883	94.2772		12.7876	71.4445		5.78864	67.2066		13.7867	80.8567		6.78732	67.821		14.7885	88.6346		7.78829	76.7352		15.7882	68.5189
0.788464	177.499		8.78882	130.131		1.78965	88.3871		9.78927	86.2458		2.78841	83.1084		10.7883	54.7823		3.78854	78.4947		11.7889	73.1683		4.78994	100.316		12.7894	66.142		5.79037	68.1878		13.7884	81.6918		6.78884	81.4592		14.7903	84.5787		7.78982	82.6849		15.7898	74.4865
0.789505	178.54		8.79035	142.048		1.79125	90.254		9.79032	79.8248		2.79021	87.0331		10.79	65.8646		3.79041	76.9141		11.7899	76.771		4.79167	96.0069		12.7906	64.612		5.79169	62.8674		13.7901	78.4202		6.79065	68.9364		14.7919	84.6652		7.79149	65.969		15.7916	80.0276
0.790547	180.371		8.79118	146.894		1.79222	78.4351		9.79136	71.9873		2.7914	83.514		10.7913	66.0734		3.7918	75.1963		11.7916	77.9788		4.79313	83.004		12.7915	68.3071		5.79259	73.1415		13.7911	72.9327		6.7919	73.5649		14.7928	85.5837		7.79267	65.7065		15.7928	80.4124
0.792144	169.676		8.79222	126.546		1.79333	78.9421		9.79309	68.161		2.79216	81.5367		10.7923	52.0624		3.79256	82.3151		11.7933	73.0967		4.7941	87.4775		12.793	76.1059		5.79405	75.2798		13.792	72.5957		6.79266	78.8347		14.7938	76.9141		7.79364	74.3314		15.7937	84.5995
0.79388	173.01		8.79389	126.272		1.79507	82.0825		9.79476	70.6423		2.79355	74.4328		10.7935	59.7061		3.79374	84.4862		11.7943	68.322		4.79521	88.3752		12.7949	59.7479		5.79586	85.1006		13.7935	71.7934		6.79398	71.8322		14.7954	80.9611		7.7951	76.3892		15.7952	77.272
0.795061	166.354		8.79542	132.051		1.79667	81.3995		9.79566	78.9182		2.79528	65.3367		10.7953	72.6315		3.79541	78.7214		11.7951	62.5244		4.79688	86.1354		12.7961	66.7802		5.79711	69.0795		13.7952	66.7056		6.79565	65.3218		14.797	79.4312		7.79683	75.6108		15.797	80.3557
0.795964	156.175		8.79646	134.998		1.79757	74.7072		9.79657	75.4289		2.79653	70.8182		10.7969	68.8917		3.79687	79.5743		11.7966	59.0351		4.79855	80.7017		12.7969	76.8306		5.79787	66.3119		13.7964	72.4257		6.79697	61.9041		14.798	77.8953		7.79822	74.4358		15.7982	79.2642
0.797491	153.613		8.7975	126.853		1.79854	84.5936		9.79816	84.4236		2.79751	80.7017		10.7978	72.4317		3.79791	78.0355		11.7983	66.6132		4.79959	89.6605		12.7981	90.7968		5.79919	69.3241		13.7973	69.1601		6.79801	58.7726		14.7991	68.3161		7.7992	71.9306		15.799	74.2628
0.799297	166.733		8.7991	119.776		1.80021	98.4196		9.79976	82.4075		2.79883	87.3791		10.7989	74.7042		3.79902	69.8132		11.7995	68.3608		4.80063	96.4692		12.7999	76.1954		5.80093	80.6509		13.7987	78.787		6.79926	72.1841		14.8006	84.7666		7.80045	82.4821		15.8003	72.1871
0.800477	181.203		8.80083	130.685		1.80174	88.5809		9.80087	70.2904		2.80056	85.2646		10.8006	76.6218		3.80069	64.3108		11.8005	67.4154		4.80216	87.2091		12.8012	75.575		5.80225	78.2621		13.8005	70.514		6.801	80.3229		14.8023	84.3282		7.80218	82.7535		15.8021	68.3787
0.80138	167.079		8.80201	131.508		1.80285	83.4961		9.80184	77.1318		2.80202	83.0935		10.8023	66.3567		3.80236	59.7956		11.8019	74.6356		4.80396	88.0829		12.8022	69.9176		5.80322	68.9692		13.8019	79.9471		6.80252	72.8939		14.8036	93.4869		7.80371	81.5158		15.8034	68.6829
0.802908	167.648		8.80299	129.931		1.80382	78.8586		9.80337	75.3842		2.80299	74.7579		10.8033	69.8907		3.8034	77.7909		11.8037	78.8735		4.80514	94.2235		12.8034	70.6572		5.8044	66.0525		13.8028	73.8334		6.8035	65.3129		14.8045	86.2249		7.80468	75.7719		15.8043	63.8963
0.804714	150.712		8.80444	140.232		1.80535	85.9207		9.80518	76.2133		2.80417	67.6719		10.8043	68.7276		3.80444	87.3075		11.805	69.6134		4.80605	107.2		12.8052	66.2344		5.80614	64.5732		13.804	68.0477		6.80461	71.2029		14.8059	79.7443		7.80586	59.2856		15.8056	73.5053
0.805894	158.686		8.80625	128.082		1.80715	93.1976		9.80643	76.079		2.80584	76.4041		10.806	64.3555		3.80597	77.3495		11.8059	68.3668		4.80764	99.6812		12.8068	69.846		5.80773	68.7992		13.8058	76.7799		6.80634	73.8542		14.8077	80.5973		7.80767	70.5975		15.8073	84.3699
0.806727	169.739		8.8075	130.539		1.80833	95.4164		9.80733	74.7281		2.80744	68.6978		10.8077	63.3714		3.8077	92.0524		11.8073	71.9336		4.80938	81.4979		12.8077	67.5556		5.80871	80.3706		13.8073	76.586		6.80794	73.0908		14.8091	81.5725		7.8092	78.626		15.8089	64.612
0.807977	165.048		8.8084	130.074		1.80924	94.3607		9.80865	68.3459		2.80848	78.7214		10.8087	66.3626		3.80888	85.2795		11.809	66.2642		4.81056	70.4842		12.8088	65.7811		5.80982	74.2121		13.8082	70.6065		6.80898	77.3853		14.8099	97.6681		7.81003	80.1589		15.8098	60.3234
0.809714	165.081		8.80986	130.673		1.8107	98.8938		9.81045	73.7439		2.80952	80.9671		10.8095	72.3541		3.80986	79.634		11.8105	71.3819		4.81133	84.9008		12.8105	75.4885		5.81155	68.3489		13.8094	68.2862		6.81002	87.048		14.8113	92.2731		7.81107	72.6524		15.811	82.6491
0.811033	162.859		8.81167	128.326		1.8125	92.6846		9.81191	82.2793		2.81126	81.6023		10.811	80.9253		3.81138	87.722		11.8114	64.0603		4.81271	100.316		12.8121	65.5604		5.81322	77.3167		13.8112	67.2007		6.81176	71.1851		14.8132	88.6913		7.81274	67.3468		15.8127	89.2788
0.812005	157.204		8.81292	138.744		1.81382	89.9618		9.81282	80.8836		2.81292	80.4004		10.8127	71.2298		3.81319	85.873		11.8126	70.5021		4.81445	96.0696		12.8131	58.1076		5.81426	75.414		13.8127	76.1178		6.81343	75.6466		14.8145	85.4644		7.81433	73.9258		15.8144	76.6427
0.813255	148.57		8.81375	145.033		1.81465	86.2637		9.81414	76.3087		2.81383	72.3661		10.8139	66.0853		3.8143	80.4064		11.8144	67.7285		4.8157	94.143		12.8142	77.2541		5.81523	89.4846		13.8135	74.6207		6.8144	66.0256		14.8152	92.2701		7.81538	77.3883		15.8153	80.0276
0.814991	149.37		8.815	153.605		1.81604	93.9104		9.81594	80.305		2.81473	76.3266		10.8149	63.7621		3.81513	81.5456		11.8159	76.2252		4.81667	99.3024		12.8159	74.5193		5.81697	85.8074		13.8146	66.98		6.8153	70.4484		14.8165	89.243		7.81649	88.2917		15.8164	90.7342
0.816589	155.215		8.81674	138.198		1.81792	93.2185		9.81733	77.1348		2.81633	89.5204		10.8163	58.3193		3.81652	77.5881		11.8167	67.1142		4.81799	82.3479		12.8176	75.8524		5.81864	78.4351		13.8162	67.4303		6.81683	68.7962		14.8182	70.3381		7.81808	79.2135		15.8181	67.2573
0.817561	156.324		8.81806	131.341		1.81917	88.4915		9.81809	80.2334		2.81799	76.5025		10.818	61.0243		3.81819	82.497		11.8178	72.9387		4.81973	89.2609		12.8186	74.4388		5.81961	85.3541		13.8178	65.2264		6.8185	76.2431		14.8196	72.7299		7.81975	77.2511		15.8198	73.213
0.818672	162.28		8.81903	134.78		1.82	75.9598		9.81927	69.9563		2.81903	80.5227		10.8194	78.8288		3.81944	78.5753		11.8194	70.5975		4.82119	81.7574		12.8194	67.0337		5.82051	69.1362		13.8189	73.5649		6.81961	77.8446		14.8206	80.5078		7.82093	78.0325		15.8207	91.6676
0.820339	156.939		8.82028	128.058		1.82125	82.5149		9.82101	72.9625		2.82001	78.447		10.8203	77.5762		3.82041	81.7276		11.8209	72.4466		4.82216	98.4017		12.8209	68.1819		5.82204	77.6984		13.8199	79.9769		6.82058	72.1573		14.8218	78.6886		7.8219	85.5002		15.8217	69.3957
0.822005	159.623		8.82201	118.288		1.82292	87.9934		9.82247	88.6645		2.82153	77.8356		10.8216	68.0148		3.82173	75.7957		11.822	74.3821		4.82334	95.0228		12.8226	70.9405		5.8237	80.0455		13.8215	81.5337		6.82211	78.6647		14.8234	78.1667		7.82336	77.9698		15.8232	72.6703
0.823047	157.944		8.82361	130.396		1.82431	99.2875		9.82344	88.6018		2.82334	82.5507		10.8234	72.9715		3.82347	62.7481		11.823	61.1167		4.82507	85.533		12.8238	73.4665		5.82489	77.1587		13.8232	81.8141		6.82384	78.4858		14.825	83.1143		7.82517	75.1396		15.8248	62.8196
0.824088	161.32		8.82458	123.859		1.82528	87.8175		9.82455	82.0079		2.82459	82.6461		10.8249	79.4699		3.82493	74.0839		11.8246	73.6753		4.82667	82.0854		12.8247	59.1305		5.82579	75.2589		13.8244	82.5567		6.82516	77.9191		14.8261	67.3408		7.82642	75.5124		15.826	79.9292
0.825755	154.377		8.82562	118.884		1.82646	92.3238		9.82622	69.7863		2.82549	73.3801		10.8258	73.4099		3.8259	81.5576		11.8264	87.0451		4.82764	89.3772		12.8261	64.6239		5.82725	77.5165		13.8253	80.7881		6.82607	70.9107		14.8271	63.61		7.82732	70.8719		15.8269	80.2573
0.827422	145.827		8.82736	126.042		1.8282	90.3017		9.82789	77.1497		2.82688	87.2359		10.827	72.4555		3.82708	90.4031		11.8275	77.4569		4.82869	84.5846		12.8279	71.3282		5.82905	86.9705		13.8268	75.2291		6.82745	66.7056		14.8288	77.1646		7.82878	66.6758		15.8284	70.9495
0.828394	154.022		8.82903	126.003		1.82979	84.9336		9.829	81.3339		2.82869	91.7303		10.8289	74.5611		3.82881	88.238		11.8284	63.6219		4.83049	88.0173		12.8293	70.8361		5.83037	79.0912		13.8286	84.024		6.82926	66.3119		14.8305	76.4936		7.83058	70.0995		15.8302	68.1312
0.829297	158.955		8.83	122.272		1.83083	86.3203		9.82997	85.4555		2.83001	83.6512		10.8303	80.6778		3.83034	89.9081		11.83	62.9389		4.83216	84.7606		12.8302	66.0107		5.83127	79.0226		13.8299	76.7292		6.83065	75.3156		14.8316	91.0175		7.83183	71.0061		15.8315	72.8253
0.830825	156.596		8.83104	131.288		1.83188	92.1955		9.83157	79.288		2.83091	81.8319		10.8311	74.3105		3.83131	83.5438		11.8317	63.2282		4.83306	88.6316		12.8315	68.331		5.83259	79.1926		13.8308	82.5924		6.83155	67.4273		14.8326	92.3059		7.83267	74.9756		15.8324	81.7306
0.832491	145.352		8.83278	124.989		1.83347	94.1877		9.8333	65.6021		2.83223	84.2953		10.8322	74.4805		3.83249	80.6032		11.833	76.1029		4.83396	85.6791		12.8333	71.6205		5.8344	71.0807		13.8322	74.4		6.8328	67.2901		14.8342	84.2924		7.83392	87.0957		15.8337	83.1472
0.833603	156.11		8.83444	116.668		1.83521	91.8168		9.83448	79.622		2.8341	82.8012		10.8339	67.323		3.83423	87.4417		11.8339	75.4587		4.83556	97.0746		12.8347	62.9837		5.83586	81.1072		13.834	75.417		6.83468	78.113		14.8359	83.6512		7.83565	78.4172		15.8355	80.2066
0.834575	158.785		8.83549	121.199		1.83625	88.8285		9.83539	90.3167		2.83542	76.4936		10.8354	72.2348		3.83583	89.6427		11.8354	75.5691		4.83723	103.284		12.8356	75.0442		5.83676	83.6601		13.8353	80.818		6.83607	75.6436		14.837	86.9854		7.83697	74.9547		15.837	78.2323
0.836102	152.665		8.83632	126.075		1.83722	91.3217		9.83698	85.2586		2.83626	91.9987		10.8364	75.4438		3.83673	76.2729		11.8372	74.2062		4.83827	99.0101		12.8368	71.2835		5.83801	77.5404		13.836	76.9767		6.8369	81.6679		14.8379	82.3807		7.83794	82.9801		15.8378	75.8703
0.837839	165.337		8.83785	122.111		1.83889	99.192		9.83879	87.1584		2.83744	85.3302		10.8375	77.7402		3.8377	78.4023		11.8384	74.2121		4.83931	83.6363		12.8387	78.3754		5.83982	80.8925		13.8374	75.0024		6.83801	77.8297		14.8393	84.6085		7.8392	85.7537		15.8392	72.4615
0.839158	172.131		8.83951	119.716		1.84063	94.1698		9.8399	95.0466		2.8391	90.9072		10.8392	86.72		3.8393	79.8129		11.8392	79.1151		4.84084	87.8354		12.8402	85.2706		5.84127	84.0418		13.8391	72.8969		6.83975	81.1758		14.841	99.0668		7.84093	74.6296		15.841	80.4601
0.840061	160.685		8.84069	135.857		1.84167	98.9922		9.84066	84.8232		2.84056	95.9711		10.8408	87.9248		3.84097	81.2683		11.8405	78.6826		4.84258	95.6252		12.841	85.6076		5.84211	87.5759		13.8404	75.0979		6.8412	80.1112		14.8422	91.8585		7.84253	83.6064		15.8424	87.2538
0.84138	161.669		8.84174	159.876		1.8425	93.9521		9.84212	88.7599		2.8416	96.162		10.8419	92.9023		3.84201	99.7587		11.8422	75.2619		4.84382	91.3903		12.842	75.0859		5.84322	94.9512		13.8414	74.1793		6.84225	73.3562		14.8431	90.5045		7.8435	88.6943		15.8432	85.3899
0.843186	162.206		8.84319	148.624		1.84396	97.4653		9.84386	98.9803		2.84271	92.3864		10.8429	72.0052		3.84305	91.7929		11.8435	73.2309		4.84473	100.37		12.8437	70.8212		5.84489	92.9053		13.8426	76.2371		6.84336	84.2655		14.8445	91.4947		7.84461	97.349		15.8443	80.129
0.844575	155.943		8.84493	156.423		1.8457	104.462		9.84504	90.4837		2.84438	79.0107		10.8444	75.7629		3.84458	92.2134		11.8445	81.1997		4.84612	101.691		12.8453	84.7994		5.84634	95.5357		13.8443	86.6752		6.84495	92.4043		14.8463	90.3316		7.84628	98.2049		15.846	90.3584
0.845547	162.247		8.84625	143.125		1.84688	104.149		9.84601	96.1083		2.84605	84.4952		10.8462	88.9448		3.84631	103.743		11.8457	95.3299		4.84792	111.634		12.8463	92.1866		5.84739	109.821		13.8459	97.5667		6.84662	94.4382		14.8477	87.1435		7.84795	102.488		15.8475	97.4027
0.846797	175.447		8.84715	138.693		1.84785	104.942		9.84733	93.2632		2.84716	89.3802		10.8474	93.4958		3.84756	103.493		11.8475	96.7316		4.84924	118.183		12.8474	77.9728		5.8485	98.4196		13.8469	91.8675		6.84773	102.529		14.8486	105.112		7.84899	94.3756		15.8485	100.018
0.848603	167.702		8.84847	139.34		1.84924	109.487		9.84914	92.619		2.84813	91.6587		10.8483	90.7133		3.84847	97.9723		11.8491	97.5279		4.85014	120.098		12.849	89.3176		5.85009	95.488		13.848	94.6172		6.84877	103.821		14.8499	94.5128		7.85003	96.9225		15.8496	98.4942
0.850061	157.398		8.85028	149.698		1.85097	112.601		9.85059	108.676		2.84973	97.179		10.8499	100.719		3.84986	106.499		11.85	101.247		4.85153	119.493		12.8507	102.559		5.85183	116.06		13.8497	94.5247		6.8503	94.3547		14.8516	106.481		7.8517	100.704		15.8513	115.517
0.850894	164.746		8.85174	145.296		1.85236	108.697		9.8515	100.862		2.85146	106.776		10.8517	99.3113		3.85166	110.552		11.8512	102.452		4.85341	127.029		12.8518	109.254		5.85294	114.119		13.8513	98.196		6.85211	104.325		14.8531	112.088		7.85336	108.27		15.853	118.353
0.851936	169.933		8.85271	163.252		1.85333	113.689		9.85268	105.169		2.85258	107.525		10.8528	99.5291		3.85298	124.363		11.8529	106.907		4.85473	137.959		12.8528	105.201		5.85391	114.453		13.8524	102.055		6.85329	124.897		14.8541	120.975		7.85433	131.992		15.854	120.468
0.853672	167.55		8.85396	167.845		1.85458	135.353		9.85448	116.039		2.85355	116.194		10.8536	100.361		3.85388	133.271		11.8545	117.205		4.85549	139.99		12.8543	107.173		5.85544	132.344		13.8534	120.2		6.85419	120.996		14.8553	132.848		7.85524	137.196		15.8551	135.544
0.85513	191.307		8.85576	165.456		1.85639	151.857		9.85601	119.412		2.85515	120.071		10.855	111.187		3.85527	133.51		11.8555	128.604		4.85674	150.81		12.8561	120.608		5.85725	123.441		13.8551	120.581		6.85572	133.31		14.8571	147.288		7.85676	138.478		15.8567	136.423
0.856172	203.612		8.85722	176.017		1.85792	166.002		9.85698	128.613		2.85688	126.653		10.8567	125.8		3.85708	129.141		11.8566	124.318		4.85841	158.212		12.8573	119.696		5.85843	132.567		13.8568	106.245		6.85752	140.062		14.8586	142.686		7.85843	138.854		15.8584	137.676
0.857283	204.924		8.85806	183.371		1.85882	175.238		9.85816	129.063		2.85799	142.552		10.858	138.186		3.85847	150.494		11.8582	132.308		4.85987	171.832		12.8582	127.163		5.85933	147.831		13.8578	116.388		6.85863	141.669		14.8595	165.453		7.85961	146.796		15.8596	157.318
0.85888	202.36		8.85917	187.612		1.86	175.79		9.8599	130.041		2.85883	149.936		10.8589	135.487		3.85923	158.788		11.86	142.114		4.86084	169.253		12.8597	142.442		5.86086	153.411		13.8587	134.216		6.85947	144.368		14.8605	148.087		7.86058	170.043		15.8605	161.642
0.860616	224.796		8.86083	189.076		1.86181	158.206		9.8615	149.074		2.86021	139.695		10.8603	126.934		3.86041	165.015		11.8609	136.489		4.86195	160.565		12.8615	137.646		5.86273	165.85		13.8602	150.255		6.86086	150.431		14.8622	158.955		7.86204	161.031		15.8621	165.683
0.861727	232.436		8.86236	176.249		1.86333	169.154		9.8624	162.185		2.86195	159.011		10.862	151.18		3.86215	171.406		11.8618	155.358		4.86369	190.138		12.8627	145.776		5.86384	176.643		13.8619	155.928		6.86252	163.348		14.8637	178.781		7.86385	177.687		15.8639	175.996
0.8627	240.867		8.86333	199.78		1.86417	199.577		9.86337	176.088		2.8632	185.736		10.8635	170.174		3.86361	188.247		11.8633	160.237		4.86528	204.453		12.8635	163.548		5.86461	192.408		13.863	151.448		6.86384	168.686		14.8647	181.361		7.86517	183.726		15.865	193.612
0.864228	242.2		8.86444	200.159		1.86514	195.795		9.86497	176.291		2.86417	179.291		10.8644	171.707		3.86458	193.389		11.865	167.633		4.86632	207.865		12.8649	177.538		5.866	189.571		13.864	155.847		6.86475	166.491		14.8658	192.771		7.86607	188.951		15.8657	190.645
0.865964	239.856		8.86611	212.237		1.86681	213.281		9.86657	192.088		2.86549	190.314		10.8656	180.935		3.86569	207.063		11.8661	189.938		4.86737	217.584		12.8665	201.232		5.86766	205.229		13.8654	169.22		6.86607	193.174		14.8674	207.761		7.86739	202.103		15.8671	201.521
0.867144	246.954		8.86778	238.419		1.8684	245.385		9.86761	227.996		2.8673	213.188		10.8674	206.69		3.86736	206.228		11.8671	189.637		4.86903	238.434		12.8679	203.171		5.86898	225.499		13.8672	195.232		6.86787	208.613		14.8691	230.405		7.86919	225.332		15.8689	218.753
0.868116	267.103		8.86889	244.655		1.86938	254.255		9.86865	227.7		2.86876	233.343		10.8689	210.489		3.86902	227.864		11.8686	212.276		4.8707	269.202		12.8688	219.18		5.86996	244.327		13.8685	211.327		6.86933	211.602		14.8703	245.94		7.87058	240.065		15.8701	251.729
0.869644	304.054		8.86986	266.721		1.87042	282.694		9.87018	244.303		2.86966	250.399		10.8699	243.408		3.87006	273.718		11.8703	232.919		4.87181	271.946		12.8701	247.67		5.87127	264.475		13.8694	236.409		6.8703	230.471		14.8713	260.145		7.87156	281.084		15.8711	270.345
0.87145	334.831		8.87139	274.418		1.87201	301.799		9.87198	266.485		2.87084	263.575		10.871	245.931		3.87104	287.967		11.8716	239.895		4.87285	290.773		12.8718	271.86		5.87301	275.23		13.8707	231.285		6.87148	254.622		14.8727	270.628		7.87281	293.329		15.8724	276.333
0.87263	377.249		8.87319	286.923		1.87375	341.589		9.87316	290.666		2.87258	296.544		10.8728	270.27		3.8727	287.904		11.8725	265.114		4.87445	321.834		12.8734	284.442		5.87447	309.786		13.8725	251.818		6.87322	286.145		14.8745	293.323		7.87461	287.645		15.8742	303.225
0.873394	391.161		8.87437	330.262		1.87493	364.332		9.87407	301.048		2.8741	317.006		10.8744	288.244		3.87444	313.716		11.8739	313.83		4.87619	375.805		12.8743	324.638		5.87544	369.629		13.874	294.51		6.87482	330.674		14.8758	348.067		7.87607	354.425		15.8756	347.461
0.874783	400.696		8.87528	355.013		1.8759	375.313		9.87552	314.826		2.87508	335.434		10.8753	325.881		3.87555	367.81		11.8757	342.567		4.87723	378.639		12.8754	335.726		5.87662	389.9		13.8749	322.977		6.87579	352.481		14.8767	378.991		7.8769	382.468		15.8766	380.798
0.87645	445.308		8.87681	364.661		1.87736	410.651		9.87733	353.814		2.87626	350.778		10.8762	334.181		3.87652	395.942		11.8771	359.51		4.87806	404.34		12.8772	338.699		5.87836	397.544		13.8761	326.454		6.8769	362.492		14.8781	374.592		7.87801	409.374		15.8778	379.277
0.877769	472.689		8.87868	412.318		1.87917	442.359		9.87865	414.471		2.87799	413.362		10.8778	348.759		3.87812	409.533		11.878	370.747		4.87952	457.196		12.8788	394.275		5.87996	444.426		13.8779	340.504		6.87863	396.536		14.88	422.13		7.87968	439.517		15.8795	423.117
0.878741	532.768		8.87986	482.048		1.88042	537.617		9.87955	435.625		2.87959	488.191		10.8795	407.922		3.87986	482.671		11.8793	433.627		4.88119	513.538		12.8798	444.798		5.881	493.139		13.8794	420.284		6.88023	465.898		14.8812	484.952		7.88128	481.726		15.8811	511.394
0.879991	563.322		8.88062	525.169		1.88132	621.623		9.88094	460.867		2.88049	542.177		10.8806	455.061		3.8809	556.081		11.8811	462.788		4.88244	581.768		12.8809	465.705		5.88204	537.942		13.8802	444.736		6.88113	530.472		14.882	541.649		7.88225	533.567		15.8821	575.544
0.881727	625.032		8.88201	537.656		1.88278	650.728		9.88275	544.817		2.88146	572.516		10.8816	497.955		3.88173	623.49		11.8825	533.54		4.88341	637.82		12.8826	513.422		5.88377	601.469		13.8813	452.723		6.88211	551.402		14.8833	607.141		7.88336	564.807		15.8832	585.054
0.883255	704.809		8.88368	590.908		1.88458	708.296		9.88414	596.641		2.88306	617.809		10.883	538.634		3.88319	634.778		11.8833	609.661		4.88473	683.817		12.8843	614.895		5.88544	672.4		13.8831	519.026		6.8837	606.417		14.885	661.142		7.88503	609.882		15.8849	655.595
0.884227	819.817		8.885	686.874		1.88583	823.216		9.8849	655.401		2.88466	683.548		10.8849	607.407		3.88493	699.128		11.8844	629.023		4.88653	765.67		12.8852	706.775		5.88634	742.888		13.8845	608.615		6.88537	696.966		14.8863	733.848		7.8867	703.61		15.8865	771.703
0.885408	882.422		8.88597	747.042		1.8866	889.373		9.88608	704.201		2.88577	753.111		10.8861	714.394		3.88611	788.493		11.8862	688.147		4.88792	893.441		12.8861	725.411		5.88732	810.145		13.8856	675.547		6.88641	763.844		14.8872	824.714		7.88781	814.347		15.8875	903.417
0.887144	942.757		8.88722	796.754		1.88792	976.901		9.88782	809.015		2.88674	832.924		10.8871	763.212		3.88708	897.936		11.8876	809.707		4.88882	987.277		12.8877	773.623		5.88884	898.446		13.8867	714.138		6.88739	796.188		14.8885	894.351		7.88878	909.996		15.8884	965.279
0.888741	1091.57		8.88896	863.153		1.88965	1076.21		9.88927	878.208		2.88827	907.205		10.8884	826.566		3.88847	943.613		11.8886	877.026		4.89007	1002.83		12.8893	874.143		5.89051	1012.73		13.8883	759.374		6.88891	852.035		14.8902	955.193		7.89031	969.097		15.89	1018.18
0.889714	1240.07		8.89049	995.18		1.89097	1215.63		9.89025	999.117		2.89008	1010.5		10.8902	937.422		3.8902	1059.95		11.8897	970.254		4.89181	1135.51		12.8904	996.018		5.89162	1130.15		13.8899	847.74		6.89065	976.916		14.8918	1079.28		7.89211	1097.3		15.8917	1137.89
0.890825	1270.9		8.89146	1102.49		1.89195	1303.13		9.89143	1058.8		2.89133	1147.85		10.8916	1044.84		3.89166	1192.06		11.8914	1050.04		4.89334	1281.86		12.8914	1078.05		5.89259	1211.77		13.891	1015.18		6.89197	1129.35		14.8928	1234.93		7.89329	1236.9		15.8927	1269.85
0.892561	1362.7		8.89257	1192.54		1.8932	1422.54		9.89309	1135.08		2.89223	1262.48		10.8925	1114.04		3.89256	1333.03		11.8931	1124.98		4.89431	1423.07		12.8929	1125.06		5.89405	1296.66		13.892	1118.79		6.89294	1231.35		14.8939	1312.2		7.8942	1304.43		15.8937	1370.67
0.894158	1664.57		8.89431	1274.43		1.89486	1578.13		9.89469	1322.8		2.89362	1306.21		10.8938	1189.06		3.89381	1420.06		11.8942	1304.6		4.89549	1469.15		12.8947	1283.2		5.89586	1416.69		13.8935	1233.49		6.89433	1324.45		14.8956	1379.89		7.89572	1363.74		15.8952	1456.13
0.89513	1833.39		8.8959	1422.22		1.89646	1698.48		9.89573	1486.92		2.89542	1422.16		10.8956	1307.31		3.89555	1497.33		11.8951	1406.45		4.8973	1590.17		12.896	1457.75		5.89711	1583.81		13.8953	1299.1		6.89614	1416.19		14.8972	1565.41		7.89753	1481.34		15.897	1607.8
0.896033	1927.76		8.89694	1601.34		1.8975	1939.06		9.89677	1565.57		2.89674	1625.04		10.897	1496.45		3.89708	1646.26		11.8967	1514.52		4.89882	1798.72		12.8969	1533.58		5.89801	1693.29		13.8965	1450.71		6.89746	1579.61		14.8983	1730.67		7.89871	1682.24		15.8983	1754.39
0.897561	2033.98		8.89799	1645.41		1.89854	2011.01		9.89837	1598.77		2.89765	1798.43		10.8978	1650.3		3.89798	1836.18		11.8985	1652.6		4.89973	1981.69		12.8983	1580.12		5.8994	1814.68		13.8974	1582.69		6.89836	1739.85		14.8993	1824.5		7.89947	1827.95		15.8992	1894.42
0.899227	2223.28		8.89972	1783.7		1.90028	2114.59		9.90011	1760.09		2.89903	1935.04		10.8989	1682.16		3.89916	1950.23		11.8997	1852		4.90077	2062.57		12.9001	1814.81		5.90121	1967.9		13.899	1660.38		6.89975	1838.06		14.901	1924.22		7.90079	1883.54		15.9005	2043.4
0.900339	2432.54		8.90139	1962.41		1.90195	2426.02		9.90122	1893.15		2.90091	2038.12		10.9007	1755.02		3.90097	2051.67		11.9005	1968.48		4.90237	2163.68		12.9015	1955.6		5.90259	2103.68		13.9008	1831.36		6.90155	1986.63		14.9027	2107.7		7.90253	1972		15.9023	2157.83
0.901311	2584.87		8.90229	2153.55		1.90292	2617.74		9.90219	2037.36		2.90216	2255.84		10.9021	1945.19		3.90256	2289.21		11.9021	2083.06		4.90389	2310.9		12.9024	2183.02		5.9035	2359.9		13.9019	2016.69		6.90294	2152.94		14.9037	2335.49		7.90385	2186.23		15.9037	2325.95
0.902839	2738.18		8.90319	2247.47		1.90396	2664.57		9.90379	2183.79		2.90292	2384.72		10.9031	2127.05		3.9034	2494.8		11.9039	2293.57		4.90501	2531.86		12.9036	2224		5.90482	2444.42		13.9027	2175.81		6.9037	2315.73		14.9045	2428.35		7.90482	2426.15		15.9046	2491.83
0.904575	2944.27		8.90479	2348.98		1.90563	2812.28		9.90559	2377.8		2.90417	2490.82		10.9042	2231.61		3.90444	2598.86		11.905	2513.46		4.90605	2660.86		12.9054	2382.05		5.90669	2511.08		13.9041	2255.63		6.90489	2373		14.9061	2554		7.90607	2566.67		15.906	2624.18
0.905825	3232.01		8.90639	2548.17		1.90736	3076.21		9.90664	2605.14		2.90591	2643.23		10.9059	2348.58		3.90604	2720.94		11.9058	2624.47		4.90757	2777.34		12.9069	2551.86		5.90808	2775.95		13.9058	2389.46		6.90655	2477.79		14.9077	2702.61		7.90781	2725.5		15.9078	2821.58
0.906797	3464.06		8.90757	2760.94		1.90833	3302.77		9.90747	2702.49		2.9073	2876.28		10.9076	2559.57		3.90763	2954.4		11.9072	2645.94		4.90931	2946.24		12.9077	2688.98		5.90884	3044.21		13.9071	2579.57		6.90801	2743.75		14.9089	2935.84		7.90933	2876.8		15.9092	3043.19
0.908116	3623		8.90854	2894.63		1.90917	3462.33		9.90893	2764.49		2.90827	3082.44		10.9087	2790.85		3.90868	3138.46		11.9089	2854.69		4.91056	3196.93		12.9088	2856.29		5.90996	3157.6		13.9081	2750.41		6.90898	2989.1		14.9099	3103.98		7.91031	3056.04		15.9099	3272.7
0.909922	3824.55		8.91	3018.48		1.9107	3592.47		9.91066	2946.3		2.90945	3175.95		10.9096	2996.37		3.90972	3240.51		11.9103	3077.14		4.91146	3409.42		12.9105	3007.64		5.91169	3272.41		13.9094	2903.99		6.91016	3072.33		14.9113	3187.57		7.91149	3267.77		15.9112	3383.96
0.911311	4112.94		8.91181	3209.82		1.91236	3830.19		9.91184	3179.77		2.91112	3352.41		10.9112	3054.13		3.91124	3384.21		11.9112	3203.96		4.91292	3508.77		12.912	3277.45		5.91315	3475.66		13.9111	3038.62		6.91183	3168.01		14.9131	3389.97		7.91322	3299.72		15.9128	3524.81
0.912214	4328.36		8.91313	3454.78		1.91354	4076.42		9.91282	3313.92		2.91278	3555.34		10.9129	3274.23		3.91298	3657.57		11.9125	3419.31		4.91466	3679.1		12.913	3445.35		5.91412	3649.11		13.9126	3139.02		6.9135	3381.14		14.9144	3612.32		7.91482	3511.66		15.9142	3682.79
0.913533	4460.63		8.91403	3605.16		1.91451	4340.95		9.91421	3421.2		2.91383	3827.28		10.9141	3542.4		3.91416	3841.09		11.9142	3587.54		4.91598	3961.13		12.9141	3612.57		5.91523	3764.09		13.9135	3389.93		6.91454	3652.94		14.9153	3891.58		7.91579	3696.59		15.9153	3930.39
0.915408	4720.92		8.91542	3804.21		1.9159	4531.14		9.91594	3620.38		2.91487	4052.82		10.9151	3612.75		3.91513	4062.86		11.9157	3833.15		4.91688	4191.03		12.9157	3755.09		5.9169	3897.32		13.9147	3619.93		6.91558	3770.11		14.9166	4005.01		7.9169	3754.19		15.9164	4122.96
0.916797	5051.9		8.91722	3863.57		1.91771	4678.96		9.91733	3892.39		2.91646	4142.43		10.9166	3725.34		3.91659	4207.63		11.9166	4003.09		4.91827	4203.17		12.9174	3925.03		5.91857	4140.1		13.9165	3738.87		6.91725	3873.66		14.9184	4107.2		7.91857	3976.76		15.918	4257.55
0.917561	5305.54		8.91854	4186.29		1.9191	4952.06		9.9183	4070		2.9182	4298		10.9184	3911.07		3.91833	4409.4		11.9178	4192.24		4.92014	4291.9		12.9185	4133.09		5.91968	4398.79		13.9181	3975.97		6.91898	4072.17		14.9199	4310.97		7.92024	4273.2		15.9197	4434.62
0.918741	5386.24		8.91944	4439.82		1.92	5242.69		9.91948	4198.11		2.91924	4674.28		10.9195	4163.54		3.91965	4642.62		11.9196	4382.65		4.92139	4582.12		12.9195	4308.05		5.92065	4516.64		13.919	4220.8		6.92009	4357.84		14.9208	4637.03		7.92121	4453.8		15.9207	4582.62
0.920408	5567.9		8.92083	4462.31		1.92125	5358.76		9.92129	4336.73		2.92021	4854.2		10.9203	4358.9		3.92055	4918.49		11.9212	4523.37		4.92216	4925.83		12.9211	4490.1		5.92225	4671.94		13.9201	4293.13		6.921	4456.35		14.922	4703.26		7.92211	4568.5		15.9218	4858.51
0.921866	5948.49		8.92264	4614.17		1.92306	5524.37		9.92282	4600.33		2.92188	4828.53		10.9217	4468.64		3.92194	4978.61		11.9221	4759.2		4.92341	5010.37		12.9228	4661.56		5.92398	4923.22		13.9218	4487.74		6.92259	4658.01		14.9238	4825.9		7.92371	4786.03		15.9234	5065.67
0.922838	6255.42		8.9241	4932.38		1.92451	5831.81		9.92372	4748.13		2.92362	5033.72		10.9235	4597.54		3.92381	5160.4		11.9232	4856.79		4.92514	5176.42		12.924	4917.88		5.92516	5161.06		13.9235	4751.32		6.9244	4873.62		14.9253	5123.54		7.92531	4983.71		15.9251	5215.77
0.924019	6480.39		8.92486	5178.59		1.92542	6043.39		9.9249	4862.89		2.92466	5378.6		10.9247	5006.65		3.92506	5429.49		11.9249	5030.21		4.92646	5441.84		12.9249	5069.44		5.92614	5339.13		13.9244	4973.43		6.92544	5081.05		14.9261	5402.17		7.92649	5201.41		15.9262	5413.09
0.925686	6656.69		8.92597	5262.56		1.92667	6157.69		9.9267	5026.9		2.92542	5584.4		10.9257	5223.75		3.92583	5601.62		11.9266	5268.66		4.92744	5708.28		12.9264	5207.2		5.92766	5444.63		13.9253	5042.29		6.92627	5181.67		14.9272	5537.93		7.92746	5372.59		15.9272	5607.35
0.927353	7005.46		8.92771	5450.82		1.92847	6459.73		9.9283	5319.87		2.92688	5756.43		10.927	5217.55		3.92708	5720.74		11.9275	5508.56		4.92869	5798.53		12.9282	5496.46		5.92947	5692.37		13.9269	5199.27		6.92773	5367.27		14.9288	5705.6		7.92892	5502.71		15.9288	5665.39
0.928394	7275.16		8.92924	5733.76		1.93	6719.37		9.92914	5526.04		2.92862	5940.29		10.9287	5378.92		3.92881	5985.58		11.9284	5574.45		4.93035	5958.7		12.9293	5737.19		5.93058	5956.35		13.9285	5372.13		6.9294	5608.22		14.9304	5911.16		7.93072	5797.14		15.9306	5907.01
0.929436	7350.65		8.93021	5954.91		1.93076	6938.16		9.93011	5590.77		2.9298	6152.97		10.9303	5626.38		3.9302	6157.31		11.93	5779.03		4.93195	6199.56		12.9302	5911.36		5.93141	6079.63		13.9296	5551.97		6.93065	5924.47		14.9314	6138.22		7.93197	5986.62		15.9317	6247.06
0.931033	7535.87		8.93132	6070		1.93181	7191.12		9.93177	5710.26		2.93077	6387.24		10.9312	5834.62		3.93118	6382.07		11.9316	5986.01		4.93299	6502.34		12.9315	6073.1		5.9328	6296.64		13.9306	5767.3		6.93162	6049.48		14.9325	6169.78		7.93288	6191.13		15.9325	6391.83
0.932769	7944.41		8.93306	6141.77		1.93354	7299.96		9.93337	6067.18		2.93216	6492.78		10.9324	5945.33		3.93236	6616.49		11.9328	6245.09		4.93403	6620.74		12.9332	6211.55		5.93447	6545.49		13.9321	5959.96		6.93294	6230.9		14.9341	6364.12		7.93426	6322.19		15.9339	6478.11
0.93395	8339.88		8.93472	6441.15		1.935	7576.33		9.93441	6302.58		2.9339	6736.5		10.9342	6153.92		3.93402	6815.31		11.9337	6409.08		4.9357	6815.89		12.9345	6513.83		5.93572	6696.12		13.9339	6221.12		6.93468	6383.88		14.9358	6763.63		7.93607	6444.3		15.9356	6740.83
0.934852	8418.22		8.93583	6817.47		1.93604	7875.67		9.93545	6504.84		2.93528	7082.06		10.9357	6364.79		3.93562	6990.86		11.9352	6577.02		4.93737	7075.16		12.9354	6793.32		5.93669	6829.26		13.9351	6400.17		6.93614	6685.84		14.9369	6960.81		7.93746	6726.06		15.9369	6984.45
0.93645	8555.46		8.9368	6891.18		1.93708	8141.86		9.93705	6599.24		2.93626	7377		10.9367	6625.81		3.93666	7305.9		11.937	6748.51		4.93848	7296.98		12.9368	6980.39		5.93801	7062.98		13.936	6643.96		6.93711	6825.65		14.9379	7144.8		7.93836	7012.65		15.9378	7207.16
0.938255	8970.07		8.9384	6981.65		1.93868	8372.82		9.93879	6785.62		2.93751	7506.88		10.9378	6800.11		3.93777	7453.73		11.9382	7168.09		4.93945	7535.3		12.9385	7107.54		5.93975	7270.15		13.9374	6765.85		6.93829	7023.46		14.9394	7352.99		7.93968	7154.26		15.9392	7377.82
0.939297	9349.01		8.94014	7240.69		1.94042	8584.48		9.9399	6996.68		2.93924	7691.95		10.9396	6951.55		3.93944	7634.3		11.9392	7410.04		4.94112	7604.5		12.94	7334.41		5.94121	7516.63		13.9392	6868.29		6.94009	7173.32		14.9412	7600.73		7.94149	7293.34		15.9409	7601.27
0.94013	9579.37		8.94125	7577.16		1.9416	8948.93		9.94087	7292.79		2.94077	8047.57		10.9412	7249.65		3.94111	7872.19		11.9406	7518.18		4.94285	7863.92		12.9409	7577.6		5.94218	7793.04		13.9406	7188.73		6.94162	7481.47		14.9424	7842.63		7.94288	7540.53		15.9423	7936.42
0.941589	9776.94		8.94222	7661.77		1.9425	9194.31		9.94233	7400.38		2.94167	8173.73		10.9421	7468.14		3.94215	8243.9		11.9424	7660.54		4.94389	8279.71		12.9421	7742.64		5.94336	7932.41		13.9415	7573.84		6.94259	7684.9		14.9433	8013.22		7.94371	7879.13		15.9432	8156.56
0.943255	10015.2		8.94382	7727.72		1.94403	9315.69		9.94414	7567.22		2.94285	8216.62		10.943	7671.72		3.94312	8405.13		11.9437	7992.25		4.94473	8401.95		12.9438	7963.02		5.94516	8234.88		13.9428	7677.14		6.9437	7789.23		14.9448	8167.93		7.94482	7966.29		15.9445	8223.49
0.944505	10321.3		8.94555	8098.12		1.94583	9569.77		9.94539	7898.85		2.94466	8485.39		10.9446	7923.08		3.94479	8599.06		11.9446	8223.79		4.94619	8440.61		12.9454	8181.28		5.94669	8406.71		13.9446	7841.22		6.94551	7965.16		14.9466	8507.8		7.94656	8194.19		15.9462	8272.38
0.945547	10633.1		8.94667	8437.23		1.94701	9918.22		9.94629	8149.7		2.94626	8878.71		10.9462	8140.23		3.94652	8855.04		11.9459	8373.16		4.94792	8724.55		12.9464	8426.27		5.94766	8717.1		13.946	8170.72		6.94711	8325.43		14.9479	8798.75		7.94801	8422.4		15.9478	8660.2
0.946797	10832.8		8.9475	8596.73		1.94799	10146.2		9.94775	8328.42		2.94709	9085.95		10.9473	8313.31		3.94756	9109.59		11.9478	8502.99		4.9491	8942.36		12.9475	8519.5		5.94877	8769.56		13.9468	8292.78		6.94794	8612.83		14.9486	8929.57		7.94906	8711.6		15.9488	9041.96
0.948533	11123.1		8.94889	8719		1.94951	10254.2		9.94962	8499.91		2.94806	9215.41		10.9483	8442.87		3.9484	9235.84		11.9491	8882.09		4.95007	9166.8		12.9493	8823.12		5.95058	8902.36		13.948	8461.35		6.94898	8707.03		14.95	9026.75		7.95017	8958.34		15.9499	9114.21
0.950061	11470.5		8.95062	9030.01		1.95132	10456.8		9.95087	8732.61		2.94973	9412.51		10.9499	8744.02		3.94986	9296.23		11.95	9131.87		4.95146	9298.12		12.9509	9095.98		5.95218	9294.26		13.9496	8636.64		6.95058	8792.37		14.9517	9213.62		7.95183	9074.49		15.9517	9340.57
0.950964	11771		8.95187	9166.64		1.9525	10768.8		9.9517	8899.2		2.95126	9699.28		10.9516	8871.03		3.95152	9629.34		11.9512	9157.7		4.9532	9632.06		12.9518	9229.45		5.95308	9554.46		13.9511	8974.27		6.95211	9123.73		14.953	9503.11		7.9535	9118.18		15.9532	9682.15
0.952144	11996.3		8.95285	9347.09		1.95326	10934.8		9.95296	9103.33		2.95237	10096		10.9528	9066.62		3.9527	10011.6		11.9528	9321.54		4.95459	9967.64		12.9527	9336.74		5.95405	9769.18		13.9521	9070.92		6.95322	9403.14		14.9539	9681.07		7.95454	9453.16		15.9542	9926.89
0.95395	12146.6		8.95417	9517.82		1.95465	11197.6		9.95462	9367.7		2.95341	10246.1		10.9537	9468.66		3.95368	10151.8		11.9543	9567.86		4.95556	10220.7		12.9543	9456.03		5.95565	9897.08		13.9533	9268.96		6.95426	9520.69		14.9552	9834.12		7.95558	9753.01		15.9551	9980.67
0.955477	12515.1		8.9559	9843.96		1.95632	11497.4		9.95608	9591.43		2.95494	10409.5		10.9552	9610.3		3.95513	10246.9		11.9553	9851.23		4.95681	10212.1		12.9559	9819.42		5.95725	10133.5		13.9549	9506.06		6.95579	9533.16		14.9569	10097.4		7.95718	9762.98		15.9567	10225.2
0.95645	12862.7		8.95736	10115.9		1.95764	11755.8		9.95705	9710.96		2.95667	10691.7		10.957	9692.34		3.95687	10486.2		11.9564	10090.7		4.95855	10373.2		12.957	10108.8		5.95836	10377		13.9566	9769.78		6.95752	9851.04		14.9584	10453		7.95892	10078.6		15.9583	10473.7
0.957561	13024.8		8.95833	10341.4		1.95861	12042.1		9.95823	9812.37		2.95785	10871.2		10.9583	9973.24		3.95826	10798.4		11.9581	10224.9		4.96007	10766.4		12.958	10289.8		5.95933	10564.8		13.9577	10011.8		6.95877	10206.3		14.9594	10591.3		7.9601	10441		15.9594	10680.7
0.959366	13218		8.95951	10553.5		1.95986	12330.6		9.95997	9973.9		2.95883	11176.3		10.9592	10182.8		3.95923	11020.7		11.9597	10565.8		4.96098	10982.5		12.9595	10350.9		5.96086	10523.5		13.9587	10263.8		6.95968	10467.8		14.9606	10894.7		7.961	10376.9		15.9605	10846.2
0.960964	13689		8.96125	10546.2		1.9616	12389.9		9.96157	10339.9		2.96028	11233.9		10.9606	10353		3.96048	11192.9		11.9608	10794.4		4.96216	11009.3		12.9613	10736.3		5.96259	10746.5		13.9603	10280		6.96114	10532.2		14.9623	10962.8		7.9626	10556.8		15.962	10995.9
0.961797	14052.9		8.96285	10846.1		1.96313	12814.8		9.96261	10597.6		2.96209	11497.1		10.9624	10484.5		3.96229	11416.9		11.9618	10913.8		4.96396	11165.8		12.9626	10996.9		5.96384	11125.3		13.962	10588.8		6.96294	10795.6		14.9639	11032.1		7.96433	10849.5		15.9637	11181.8
0.962769	14172.4		8.96382	10994.8		1.9641	13109.6		9.96365	10661.2		2.96341	11947.7		10.9637	10774.3		3.96374	11674.6		11.9634	10995.6		4.96556	11512.5		12.9635	11185.6		5.96475	11387.4		13.9632	10741.5		6.96426	11060.4		14.9649	11317.5		7.96545	11009.5		15.965	11429.9
0.964436	14378.4		8.96493	11173.3		1.96521	12961.1		9.96532	10739.6		2.96424	12055.3		10.9646	11028.7		3.96465	11887.4		11.9651	11283.2		4.96639	11785.8		12.9649	11237.8		5.96614	11481.3		13.9641	10964.9		6.96509	11169.6		14.966	11551.2		7.96628	11252.7		15.9659	11556.6
0.966033	14613		8.96667	11240.7		1.96695	13146.6		9.96698	11022.4		2.9657	12176.7		10.9658	11038.7		3.9659	12225.7		11.9663	11615		4.96737	11994		12.9667	11308.7		5.96794	11524.3		13.9656	11194.3		6.96648	11159.6		14.9677	11687.8		7.96767	11339.9		15.9673	11682
0.967075	14874.6		8.96826	11513.5		1.96854	13556		9.96809	11172.4		2.96751	12375.8		10.9675	11260		3.9677	12293.7		11.9672	11721.3		4.96903	11996.4		12.968	11590.4		5.96933	11651.4		13.9675	11322.1		6.96836	11372.8		14.9693	11922.2		7.9694	11507.7		15.9691	11923.7
0.968116	15034.7		8.96917	11842.9		1.96958	13856.4		9.96907	11294.1		2.96876	12520.1		10.9689	11479.2		3.96916	12608.5		11.9688	11764.3		4.97063	12202.5		12.9689	11699.6		5.97016	11931.5		13.9686	11580.1		6.96968	11631.9		14.9703	12161.1		7.97065	11669.8		15.9705	12121.4
0.969644	15154.3		8.97014	11903.2		1.97063	13886.4		9.97073	11526.3		2.96959	12578.3		10.9699	11653.1		3.96999	12773.6		11.9706	11920.2		4.97167	12298		12.9703	11837.2		5.97155	12053.5		13.9694	11743.4		6.97044	11836.4		14.9713	12209.3		7.97163	11825.9		15.9713	12201.7
0.97138	15451.6		8.97174	11911.7		1.97236	13993.4		9.97247	11718		2.97084	12737.8		10.971	11771		3.97111	12725		11.9717	12056.9		4.97271	12430.7		12.9722	12219.9		5.97343	12226.5		13.9708	11811.2		6.97169	11967.7		14.9728	12134		7.97295	11970.3		15.9727	12365.9
0.97263	15736.1		8.97333	12150.6		1.97403	14309.3		9.97351	11914.5		2.97258	12956.6		10.9728	11755.2		3.97277	12792		11.9725	12323.7		4.97431	12471.8		12.9735	12384.9		5.97482	12334		13.9725	11987.6		6.97343	12031.3		14.9744	12418.3		7.97468	11965.8		15.9746	12480
0.973533	15929.6		8.97444	12459.5		1.97493	14540		9.97434	11892.6		2.9739	13194.6		10.9744	12031.3		3.9743	13035.8		11.9739	12477.1		4.97605	12780.8		12.9743	12394.7		5.97558	12564.8		13.9737	12156.5		6.97475	12287.3		14.9756	12738.6		7.97621	12156.1		15.9759	12627
0.974991	15973.7		8.97549	12517.5		1.97583	14629.6		9.97587	12006.2		2.97487	13354.3		10.9754	12109.5		3.97534	13159.9		11.9757	12552.4		4.97716	12982.4		12.9754	12539.6		5.97676	12614.7		13.9747	12336.8		6.97572	12451.5		14.9766	12756		7.97711	12423.7		15.9767	12757
0.976797	16130.7		8.97701	12651.1		1.97743	14652.8		9.97754	12110.4		2.97612	13383.9		10.9764	12050.4		3.97638	13351.5		11.9768	12644.3		4.97813	12887.2		12.9772	12665.8		5.97843	12766		13.976	12340.4		6.97697	12501.1		14.978	12759.7		7.97829	12594.8		15.9779	12850.4
0.978047	16344.3		8.97875	12757.2		1.9791	14729.9		9.97872	12308.8		2.97778	13501.4		10.978	12277.8		3.97798	13558.7		11.9778	12842.4		4.97959	13027.2		12.9786	12713.5		5.97989	12889.4		13.9778	12335		6.97864	12540		14.9797	13079.1		7.98003	12551.4		15.9796	12921.7
0.979019	16585.9		8.98007	12744.8		1.98021	14926.5		9.97969	12389.9		2.97938	13802.9		10.9798	12485.3		3.97972	13575.4		11.9792	12898		4.98139	13279.5		12.9796	12925.6		5.98086	12929.7		13.9793	12462.3		6.98023	12823.5		14.9811	13079.3		7.98163	12645.3		15.981	13147.4
0.980408	16536.7		8.98097	12832.5		1.98118	15105.3		9.98115	12474.9		2.98042	13822.5		10.9809	12581.8		3.98083	13601		11.9809	12963.6		4.98257	13249.6		12.9807	12939.5		5.98197	13139		13.9802	12758		6.98127	12942		14.982	13128		7.9826	12787.9		15.982	13285.8
0.982214	16841.2		8.98236	13058		1.98264	15216.9		9.98289	12499.8		2.98146	13937.2		10.9819	12637.3		3.9818	13745.6		11.9824	13219.1		4.98348	13366.3		12.9824	13003.2		5.98371	13011.6		13.9814	12753.1		6.98232	13037.3		14.9833	13235.8		7.98378	12957.1		15.9832	13289.8
0.983533	17002		8.98417	13047.7		1.98445	15254		9.98427	12563.5		2.9832	14092.4		10.9835	12857.4		3.98333	13965.8		11.9834	13275.3		4.98501	13519.4		12.984	13264.2		5.98537	13160.3		13.9831	12910.9		6.98398	12956.2		14.9851	13306.3		7.98551	13021		15.9848	13287.9
0.984366	16910.1		8.98549	13201.7		1.9857	15249.1		9.98518	12654.1		2.98487	14257.7		10.9852	12858		3.98506	14024.8		11.9846	13396.6		4.98681	13641.8		12.9851	13296.6		5.98641	13431.8		13.9846	13032		6.98572	12921.4		14.9866	13538.5		7.98711	13076.1		15.9864	13512.2
0.985547	16923.3		8.98639	13337.3		1.98667	15376.4		9.9865	12771.4		2.98584	14258.1		10.9863	12954.4		3.98631	14021.7		11.9863	13454.9		4.98806	13697.8		12.9861	13414.8		5.98739	13439.8		13.9856	13091.9		6.98683	13003.2		14.9874	13520.1		7.98801	13131.2		15.9875	13693.3
0.987283	16999.3		8.98778	13511.3		1.98799	15544.8		9.98823	12835.8		2.98688	14302.8		10.9871	13072.7		3.98722	14088.7		11.9879	13603.6		4.98882	13500.6		12.9877	13246		5.98905	13405.7		13.9868	13175.4		6.9878	13216.5		14.9887	13566.5		7.98899	13253		15.9885	13580
0.988741	17135		8.98965	13447.6		1.98972	15690.7		9.98969	12938.6		2.98855	14230.1		10.9886	13072.3		3.98868	14136.7		11.9889	13626.5		4.99014	13521.8		12.9895	13358.6		5.99079	13431.3		13.9885	13182.9		6.9894	13192.4		14.9905	13603.6		7.99058	13269.8		15.9902	13636.2
0.989644	17398.2		8.99097	13498.3		1.99118	15660.3		9.99066	12973.3		2.99028	14129.2		10.9903	13226.9		3.99048	14092		11.99	13630		4.99188	13838.8		12.9906	13491		5.9919	13598.3		13.9901	13165.6		6.99114	13236.8		14.992	13761.3		7.99218	13276.1		15.9919	13735.5
0.990825	17505.4		8.99174	13593.1		1.99215	15689.5		9.99191	12969.7		2.99126	14296.4		10.9915	13388.7		3.99173	14341.6		11.9917	13619.8		4.9932	13877.6		12.9915	13581.4		5.99287	13567.1		13.991	13432.6		6.99218	13214.7		14.9928	13802.4		7.99329	13270.3		15.993	13687.3
0.992491	17458.6		8.99299	13638.3		1.9934	15725.4		9.99372	13070		2.99209	14399.6		10.9925	13426.8		3.99249	14319.3		11.9933	13646.2		4.9941	13899.9		12.9931	13568.2		5.99447	13524.3		13.992	13481		6.99308	13275		14.9939	13945.9		7.99426	13407.1		15.994	13654.3
0.994158	17456.8		8.99465	13628.6		1.99528	15780.2		9.99518	13140		2.99362	14523.3		10.9938	13375.8		3.99381	14253.7		11.9942	13752.2		4.99535	13912		12.9949	13528.9		5.99627	13553.7		13.9936	13401.2		6.99454	13479.5		14.9956	13738.9		7.99579	13352.6		15.9956	13671.8
0.9952	17424.6		8.99611	13617.9		1.99667	15837.6		9.99601	13065.6		2.99528	14574		10.9956	13240.6		3.99555	14384.8		11.9952	13756.7		4.99709	13907.4		12.996	13749		5.99732	13615.3		13.9952	13584.8		6.9962	13621.6		14.997	13738.7		7.99753	13193.4		15.9973	13782.4
0.996241	17573.3		8.99715	13649		1.99743	15843.6		9.99712	13001.5		2.99646	14622.2		10.997	13266.5		3.99687	14576.8		11.9968	13747.6		4.99869	13995.2		12.9968	13733.7		5.99808	13577.1		13.9963	13572.9		6.99739	13595.6		14.9981	13854.9		7.99885	13327.2		15.9984	13843.8
0.997839	17601.4		8.99826	13630.5		1.99861	15785.1		9.99879	12954.4		2.99744	14695.6		10.998	13291		3.99784	14606.1		11.9984	13798.9		4.99966	13917.5		12.9982	13658		5.99954	13607.2		13.9973	13554.7		6.99836	13559.7		14.9992	13722.2		7.99975	13331.2		15.9992	13839.1
0.999575	17625.8		9	13515.6		2.00028	15709.6		10.0003	13160.8		2.9989	14581.7		10.9992	13401.6		3.99909	14449.6		11.9994	13734.1		5.00077	13828.7		12.9999	13661.9		6.00127	13699		13.9988	13582.1		6.99975	13429.9		15.0009	13699.9		8.00114	13274.8		16.0007	13701.4
1.00069	17653.4		9.0016	13625.4		2.00174	15795.8		10.0013	13162.8		3.00063	14561.5		11.001	13292		4.00083	14340.4		12.0005	13820.7		5.00244	13857.4		13.0012	13732.7		6.00245	13626.6		14.0006	13533.7		7.00155	13399		15.0025	13715.4		8.00294	13455.4		16.0024	13680.3
1.00166	17575.1		9.00264	13705.4		2.00278	15784.1		10.0024	13193.3		3.00202	14647.1		11.0025	13309.5		4.00243	14461.7		12.002	13779.2		5.0041	13988.5		13.0022	13764.4		6.00343	13454		14.0019	13402.9		7.00294	13353.5		15.0036	13785.1		8.00433	13516.7		16.0036	13845.2
1.00326	17432.5		9.00368	13614.3		2.00389	15680		10.004	13162.2		3.00292	14516.6		11.0034	13332.6		4.0034	14467.3		12.0037	13752		5.00514	13870		13.0035	13582.7		6.00482	13598.2		14.0028	13337.5		7.00384	13446.6		15.0046	13771.1		8.00524	13269		16.0046	13903
1.00506	17539.4		9.00535	13578.5		2.00549	15844		10.0057	13019.7		3.00424	14585.1		11.0046	13261.4		4.00444	14495.3		12.005	13706.8		5.00619	13922.9		13.0052	13707.9		6.00655	13592.1		14.0042	13434.9		7.00509	13502.5		15.0062	13815.2		8.00656	13390.2		16.006	13820
1.0061	17532.8		9.00701	13614.1		2.00715	15731.2		10.0068	12949		3.00598	14624.9		11.0064	13204.8		4.00618	14497.2		12.0059	13738.6		5.00792	13783		13.0067	13773.4		6.00794	13664.3		14.006	13442.7		7.00683	13367.7		15.0079	13721.4		8.00843	13485.2		16.0077	13778.9
1.00694	17461.1		9.00812	13598.4		2.00826	15597.1		10.0078	13048		3.00744	14468.6		11.0079	13273.2		4.00784	14296.4		12.0073	13861		5.00959	13717.3		13.0077	13599.8		6.00891	13616.4		14.0073	13379.7		7.00836	13298.6		15.0091	13688.7		8.00975	13383.1		16.0091	13614.7
1.00839	17344.9		9.0091	13454.1		2.00924	15682.4		10.0093	13033.7		3.00841	14497.7		11.0088	13111.5		4.00881	14241.6		12.0091	13720.5		5.01056	13569.7		13.0088	13612.9		6.01016	13533.9		14.0082	13351.6		7.00933	13331.7		15.01	13656.8		8.01051	13179.6		16.01	13500
1.01013	17348.9		9.01069	13499.7		2.01083	15672.9		10.0111	12922.1		3.00959	14437.6		11.0098	13082		4.00986	14172.4		12.0105	13696.5		5.01146	13466.7		13.0106	13576.4		6.0119	13488.6		14.0096	13284.5		7.01051	13390		15.0116	13524.8		8.01176	13034.8		16.0112	13698.3
1.01131	17317.2		9.0125	13327.6		2.01257	15555.5		10.0123	12813.3		3.0114	14413.8		11.0114	13190		4.01159	14129.8		12.0114	13542.7		5.01299	13517.9		13.0121	13456.1		6.01343	13428.8		14.0115	13202.1		7.01232	13204.3		15.0134	13556.2		8.01343	12951.8		16.013	13655.5
1.01228	17227.5		9.01354	13285.5		2.01375	15429		10.0132	12653		3.01292	14349.9		11.013	13152.9		4.01326	14105.5		12.0128	13554.4		5.01459	13516.9		13.0131	13554.2		6.0144	13307.8		14.0128	13114.8		7.01384	13068.9		15.0145	13396.6		8.01489	12976.1		16.0146	13504.6
1.01367	17173.9		9.01431	13200		2.01472	15344.6		10.0147	12709.9		3.01369	14239.5		11.0141	12910.9		4.01423	13959		12.0146	13402.4		5.01577	13354.7		13.0143	13424.2		6.01551	13185		14.0135	13235.4		7.01468	12920.2		15.0153	13455.3		8.01586	12871		16.0155	13406.5
1.01541	16963.8		9.01576	13253.1		2.01625	15342.3		10.0166	12677.8		3.0148	14262.2		11.0151	12721		4.01513	13921.2		12.0159	13292.1		5.01674	13221.8		13.016	13298		6.01732	13241.8		14.0147	13095.8		7.01572	13073.9		15.0167	13276.2		8.01697	12883.6		16.0167	13320.8
1.0168	16936.8		9.0175	13070.6		2.01806	15191		10.0177	12435.8		3.01646	14206.9		11.0167	12745.4		4.01666	13995.5		12.0167	13314.8		5.0182	13179.7		13.0176	13182.3		6.01891	13117.5		14.0165	13036.5		7.01732	13004.4		15.0184	13337.2		8.01871	12898.8		16.0185	13145
1.01777	16818.7		9.01868	12996		2.01917	15043.7		10.0185	12374.1		3.01799	14113.2		11.0184	12821.7		4.01826	13728.9		12.0179	13278.4		5.01994	13202.8		13.0184	13094		6.01975	12991.9		14.0179	12969.2		7.01891	12868.7		15.0197	13192.2		8.02038	12655.7		16.02	13180.6
1.01895	16865.4		9.01965	12875.5		2.02	15071.2		10.0198	12345.6		3.01896	14024		11.0196	12630		4.01944	13737.3		12.0196	13072.7		5.02126	13118.7		13.0194	12972.4		6.02079	12899.6		14.0189	12843.8		7.01995	12597.8		15.0206	13056.6		8.02142	12456.8		16.0208	13101.8
1.02076	16764.3		9.02104	12750.4		2.02139	14971.3		10.0216	12331.1		3.02008	13941.5		11.0205	12567.7		4.02041	13629.3		12.021	13056		5.02216	12882.7		13.0211	12788.3		6.02239	12925.1		14.02	12671.3		7.021	12723.5		15.0219	13087.2		8.02246	12411.3		16.0219	12967.5
1.02228	16563.2		9.02285	12654.1		2.02306	14683.2		10.0229	12368.5		3.02167	13639.7		11.022	12492.8		4.02187	13675.7		12.022	12897.5		5.02348	12839.2		13.0226	12707.6		6.02398	12696		14.0217	12732.6		7.02259	12686		15.0237	12949.2		8.02406	12322.5		16.0235	12853
1.02319	16276.8		9.02424	12442.9		2.02438	14543.3		10.0239	12025		3.02341	13663.5		11.0238	12352.1		4.02367	13402.6		12.0232	12761.8		5.02528	12786.3		13.0237	12550.8		6.02502	12444.7		14.0233	12642.2		7.02426	12389		15.0252	12702.3		8.02579	12070.8		16.0251	12618.8
1.02437	16126.5		9.02521	12385		2.02528	14449.8		10.0251	12058.2		3.02452	13418.1		11.0251	12193.5		4.02499	13193		12.0248	12737		5.02674	12714.3		13.0247	12474.5		6.02607	12370.6		14.0244	12411		7.02551	12248		15.0261	12531.6		8.0269	11916.5		16.0262	12606.1
1.02617	16137.6		9.02639	12240.7		2.0266	14315		10.0268	11910.5		3.02549	13321.9		11.026	11895.9		4.0259	13196.1		12.0265	12496.2		5.02764	12417.4		13.0263	12460.6		6.02766	12247.1		14.0254	12211.8		7.02641	12217.7		15.0273	12312.8		8.02787	11823.6		16.0272	12458.3
1.0277	15900.9		9.02819	12198.9		2.02833	14234.3		10.0284	11672.5		3.02702	13266.7		11.0274	11812.9		4.02722	13129.2		12.0275	12333.9		5.02889	12329.6		13.028	12142.9		6.02933	12136.5		14.027	12164.3		7.02787	11977.5		15.0291	12161.5		8.02947	11908.3		16.0287	12213.2
1.0286	15595.1		9.02972	12070.3		2.02986	14018.4		10.0293	11510.7		3.02883	13053.5		11.0292	11767.8		4.02902	12924.9		12.0285	12146.7		5.0307	12050.5		13.0292	11920		6.03058	11994.6		14.0287	11977.9		7.02968	11832		15.0306	12032.8		8.03128	11582.4		16.0305	12138.5
1.02957	15418.2		9.03062	11751		2.03076	13644.6		10.0305	11428.1		3.03001	12846.9		11.0305	11449.1		4.03041	12736.9		12.0302	11977.2		5.03216	11845.4		13.0302	11856.1		6.03148	11847.2		14.0298	11714.5		7.031	11551.4		15.0316	11881.5		8.03232	11375.2		16.0317	12063.6
1.03124	15086.3		9.03181	11728.8		2.03195	13452.8		10.0323	11377.4		3.03091	12621.3		11.0313	11328.5		4.03131	12435.9		12.0318	11751.6		5.03299	11744.9		13.0316	11825		6.03294	11613.4		14.0308	11611.7		7.0319	11505.1		15.0327	11733		8.03315	11325.5		16.0326	11830.2
1.03277	14785.4		9.03361	11520.6		2.03368	13397.8		10.0339	11214.6		3.03244	12556.1		11.0326	11300.3		4.03256	12372		12.033	11554.5		5.0341	11711		13.0334	11672.8		6.03475	11419.8		14.0324	11594.8		7.03329	11405.9		15.0344	11607.9		8.03461	11119.3		16.0341	11653.8
1.03388	14692.3		9.03521	11375.8		2.03528	13137.2		10.0349	10915.1		3.03424	12447.9		11.0343	11157.4		4.03444	12272.6		12.0339	11509		5.03577	11476.8		13.0347	11397.9		6.03607	11312.7		14.0342	11396		7.03516	11096.6		15.0361	11232.4		8.03628	10951.8		16.0359	11518.3
1.03492	14430.4		9.03604	11135.2		2.03625	12784.8		10.0359	10654.1		3.03542	12070.1		11.0357	10971.3		4.03583	11947.2		12.0355	11350.9		5.03723	11343.5		13.0356	11112.4		6.0369	10941.8		14.0352	11062.5		7.03641	10822.7		15.037	11076		8.03746	10652.9		16.0371	11270.8
1.03645	14244.3		9.03701	10896.1		2.03736	12572.2		10.0377	10424.1		3.03619	11848.9		11.0367	10793.3		4.03666	11549.7		12.0373	11180.7		5.03827	11065.1		13.037	11032.9		6.03829	10788.1		14.036	10821.3		7.03718	10628.5		15.0379	10977.7		8.03843	10459.4		16.038	10971.7
1.03819	14049.3		9.03868	10928.2		2.0391	12529.8		10.0393	10195.5		3.03751	11675		11.0378	10560.1		4.03777	11439.9		12.0384	10789.2		5.03938	10783.3		13.0388	10829.2		6.04016	10670.4		14.0374	10876.7		7.0385	10621.5		15.0395	10781.1		8.03982	10373.3		16.0394	10841.2
1.03937	13703.8		9.04028	10622.3		2.04076	12119.7		10.0403	10034.7		3.03924	11396.4		11.0396	10330.1		4.03944	11273.3		12.0392	10656.6		5.04098	10652.3		13.0402	10604.9		6.04141	10306.5		14.0392	10605.3		7.04016	10501.3		15.0411	10476		8.04163	10248.7		16.0413	10507.2
1.04034	13459.8		9.04132	10394.5		2.04167	11986.7		10.0412	9967.36		3.04056	11198.3		11.0412	10025		4.0409	11073.2		12.0407	10559.4		5.04264	10373.5		13.0409	10348.5		6.04218	10109.6		14.0403	10207.8		7.04148	10223		15.0422	10186.4		8.04301	9844.38		16.0426	10279.5
1.0418	13133.4		9.04236	10086.1		2.04257	11698.3		10.0427	9735.75		3.04153	10973.1		11.0421	9854.52		4.04194	11000.3		12.0424	10266.8		5.04376	10134.9		13.0421	10216.7		6.04343	9942.33		14.0413	9968.97		7.04245	10061.6		15.0431	10040.5		8.04392	9624.16		16.0433	10106.3
1.0436	12903.8		9.04389	9817.12		2.04417	11580.4		10.0444	9459.91		3.04278	10683.5		11.0433	9642.49		4.04305	10672.2		12.0436	10046.3		5.04473	9891.49		13.0438	10015.2		6.04516	9676.6		14.0427	9839.13		7.0437	9792.39		15.0447	9976.99		8.04517	9596.62		16.0446	9863.06
1.04485	12590.1		9.04569	9613.09		2.04583	11242.8		10.0456	9243.7		3.04452	10672.2		11.0449	9532.39		4.04465	10447.6		12.0446	9846.62		5.04626	9725.46		13.0452	9684.39		6.04655	9345.84		14.0444	9580.7		7.04544	9602.87		15.0465	9766.32		8.0469	9311.81		16.0463	9787.74
1.04576	12318.5		9.04688	9274.73		2.04688	10936		10.0466	9022.64		3.04605	10381.7		11.0466	9412.57		4.04631	10183.2		12.0459	9641.05		5.04806	9450.66		13.0462	9432.91		6.04752	9337.01		14.0458	9314.9		7.04697	9370.41		15.0477	9400.79		8.04843	8960.98		16.0476	9500.73
1.04721	12115		9.04778	9139		2.04785	10701.9		10.048	8912.48		3.04702	10091.9		11.0476	9138.51		4.04743	9780.91		12.0477	9448.68		5.04924	9317.81		13.0474	9207.98		6.04871	9139.28		14.0468	9193.41		7.04801	9145.97		15.0486	9220.63		8.0494	8779.01		16.0486	9238.27
1.04902	11793.5		9.04924	9017.03		2.04938	10489.3		10.0498	8726.97		3.04813	9958.03		11.0486	8765.18		4.0484	9694.6		12.0491	9129.04		5.05014	8998.72		13.0491	9221.31		6.05037	8982.63		14.0481	9066.54		7.04912	9028.61		15.05	9023.42		8.05051	8715.88		16.0498	9183.94
1.05034	11422.4		9.05111	8886.89		2.05118	10254.9		10.0511	8411.36		3.04987	9668.13		11.0503	8651.72		4.04993	9524.82		12.05	8851.17		5.05167	8818.95		13.0507	8994.43		6.05197	8618.67		14.0498	8812.45		7.05079	8766.59		15.0518	8857.66		8.05232	8459.44		16.0516	8947.54
1.0511	11067.9		9.05236	8582.91		2.05243	9899.95		10.0521	8143.14		3.05153	9204.07		11.0521	8386.05		4.05173	9153.42		12.0513	8651		5.05348	8573.06		13.0518	8591.39		6.05301	8438.64		14.0513	8549.7		7.05245	8410.74		15.0531	8598.05		8.05392	8114.11		16.0531	8611.75
1.05235	10849.9		9.05319	8246.93		2.05333	9659.26		10.0534	8097.29		3.05251	8986.76		11.0531	8181.21		4.05291	9004.03		12.053	8494.53		5.05466	8187.52		13.0528	8360.37		6.05412	8283.52		14.0523	8366.17		7.0535	8183.1		15.0541	8268.24		8.05482	7861.62		16.0541	8266.66
1.05409	10709.9		9.05465	8175.99		2.05479	9570.94		10.0552	7910.76		3.05355	8839.36		11.0539	8037.4		4.05381	8794.47		12.0546	8285.55		5.05542	8002.32		13.0545	8228.44		6.05579	8017.84		14.0534	8216.58		7.05447	8124.24		15.0554	8155.74		8.05579	7628.72		16.0552	8220.95
1.05548	10371.2		9.05653	7946.2		2.0566	9342.5		10.0566	7550.56		3.05528	8582.46		11.0554	7856.16		4.05534	8696.04		12.0555	8019.07		5.05681	7863.58		13.0561	7971.46		6.05746	7712.79		14.0552	7984.84		7.05621	7859.4		15.0572	7925.09		8.05739	7479.24		16.0569	8145.89
1.05645	10090.2		9.05778	7603.34		2.05792	8951.6		10.0575	7340.67		3.05695	8327.97		11.0571	7620.94		4.05715	8380.82		12.0567	7892.99		5.05848	7674.45		13.0572	7643.67		6.0585	7578.01		14.0568	7706.73		7.05794	7585.58		15.0586	7589.77		8.05899	7399.87		16.0586	7685.14
1.0577	9888.63		9.05854	7296.81		2.05882	8625.46		10.0588	7133.11		3.05785	8083.76		11.0583	7274.82		4.05833	7919.06		12.0585	7654.31		5.0598	7472.03		13.0582	7414.14		6.05947	7432.42		14.0576	7379.94		7.05891	7273.14		15.0594	7368.69		8.06003	7201.14		16.0596	7500.83
1.05944	9683.12		9.05979	7305.32		2.06021	8491.39		10.0606	6943.13		3.05876	7987.75		11.0593	7161.06		4.05909	7722.98		12.0601	7304.88		5.06077	7304.16		13.0598	7342.42		6.06114	7294.88		14.0586	7385.44		7.05975	7206.24		15.0606	7345.18		8.06107	6998.94		16.0606	7372.32
1.06103	9188.91		9.06153	7028.06		2.06201	8223.78		10.0621	6683.81		3.06035	7868.34		11.0608	7039.86		4.06048	7701		12.0609	7226.31		5.06209	7123.16		13.0616	7068.84		6.06287	6938.48		14.0603	7249.14		7.06127	7066.06		15.0622	7078.2		8.06267	6799.62		16.0623	7204
1.06201	8859.38		9.06292	6792.89		2.0634	7936.91		10.0629	6587.16		3.06202	7533.03		11.0625	6736.29		4.06222	7500.57		12.0619	7024.23		5.06382	7098.08		13.0626	6790.39		6.06391	6604.41		14.0619	6881.87		7.06294	6716.6		15.0637	6698.54		8.0644	6583.94		16.064	6956.18
1.06312	8748.18		9.06389	6598.11		2.06417	7639.93		10.064	6440.43		3.06313	7215.8		11.0639	6489.72		4.06347	7168.68		12.0636	6894.38		5.06528	6831.18		13.0634	6697.83		6.06475	6522.83		14.0629	6609.4		7.06412	6480.06		15.0647	6499.15		8.06565	6294.7		16.0651	6618.38
1.06478	8576.4		9.06507	6401.33		2.06535	7569.24		10.0657	6236.5		3.0641	7009.75		11.0648	6356.94		4.06444	6914		12.0651	6613.29		5.06632	6478.97		13.0649	6653.12		6.06627	6409.53		14.064	6477.31		7.06509	6311.65		15.0659	6446.48		8.06656	6017.63		16.0659	6422.53
1.06645	8180.22		9.06681	6391.21		2.06701	7373.7		10.0672	6137.65		3.06556	6874.89		11.0661	6212.49		4.06576	6784.06		12.0662	6427.39		5.06744	6249.1		13.0666	6327.64		6.06801	6094.57		14.0655	6312.4		7.06648	6260.75		15.0675	6355.04		8.06801	5945.62		16.0674	6333.3
1.06749	7825.49		9.0684	6087.75		2.06847	6998.53		10.0682	5821.43		3.06737	6667.71		11.0678	6001.3		4.06749	6641		12.0672	6140.46		5.06917	6130.57		13.0678	6103.87		6.06919	5897.61		14.0673	6182.38		7.06822	6044.62		15.0692	5976.66		8.06982	5734.33		16.0691	6126.79
1.06853	7587.8		9.06938	5801.48		2.06951	6697.77		10.0693	5575.87		3.06862	6409.98		11.0693	5643.71		4.06902	6346.29		12.0688	6003.56		5.07077	5919.74		13.0688	5837.6		6.07009	5794.55		14.0685	5824.14		7.06961	5833.32		15.0702	5733.49		8.07114	5456.5		16.0703	5832.09
1.0702	7320.09		9.07049	5588.44		2.07063	6536.98		10.0709	5426		3.06959	6169.47		11.0703	5481.02		4.06999	6037.29		12.0705	5885.59		5.07181	5677.51		13.0702	5637.89		6.07148	5618.71		14.0694	5677.8		7.07051	5611.16		15.0713	5564.83		8.07197	5324.06		16.0712	5641.81
1.07194	7162.77		9.07215	5435.15		2.07229	6383.46		10.0726	5186.9		3.07091	5998.59		11.0715	5395.19		4.07111	5939.76		12.0717	5626.47		5.07285	5556.08		13.072	5530.29		6.07322	5385.59		14.0708	5507.22		7.07183	5445.14		15.0729	5404.31		8.07336	5233.08		16.0726	5609.68
1.07298	6910.48		9.07382	5221.09		2.07396	6120.81		10.0737	5035.96		3.07271	5743.52		11.0733	5239.01		4.07284	5788.17		12.0726	5362.03		5.07459	5370.17		13.0733	5274.98		6.07461	5139.11		14.0726	5266.46		7.07364	5282.84		15.0746	5214.57		8.07524	4981.21		16.0744	5302.52
1.07381	6636.58		9.07493	4986.49		2.075	5791.73		10.0748	4875.4		3.0741	5537.74		11.0749	5086.7		4.07444	5386.48		12.0741	5183.26		5.07626	5122.8		13.0743	5050.17		6.07558	4950.28		14.074	5023.99		7.07509	5076.32		15.0757	4968.2		8.07656	4696.2		16.0757	5024.37
1.07534	6538.73		9.0759	4921.58		2.07597	5548.35		10.0763	4728.41		3.07501	5304.25		11.0757	4793.48		4.07548	5197.85		12.0759	4983.1		5.07716	4938.57		13.0755	4929.98		6.07683	4758.25		14.0749	4881.82		7.076	4822.56		15.0767	4815.22		8.07732	4501.09		16.0767	4841.1
1.07701	6232.55		9.07757	4784.46		2.07764	5414.88		10.078	4532.92		3.07633	5195.64		11.0767	4613.28		4.07652	5158.7		12.0772	4740.72		5.07806	4757.35		13.0773	4867.66		6.07864	4621.22		14.0762	4730.93		7.07725	4681.93		15.0783	4725.39		8.07857	4504.22		16.078	4735.01
1.07819	5844.8		9.07931	4444.35		2.07938	5235.43		10.0792	4342.1		3.07813	4994.18		11.0784	4469.13		4.07826	4956.7		12.0781	4472.28		5.07966	4562.85		13.0788	4581.6		6.08009	4417.58		14.0781	4519.81		7.07912	4478.83		15.08	4445.82		8.08031	4281.11		16.0798	4643.57
1.07916	5595.43		9.08028	4247.05		2.08049	4972		10.0801	4200.4		3.07959	4720.06		11.08	4292.53		4.07993	4728.52		12.0796	4421.51		5.08126	4356.31		13.0797	4299.2		6.081	4147.71		14.0793	4222.27		7.08058	4150.12		15.0811	4157.37		8.08162	4042.95		16.0812	4455.64
1.08062	5458.54		9.08118	4069.26		2.08146	4833.72		10.0816	4071.66		3.08035	4489.88		11.081	4072.61		4.08083	4525.83		12.0814	4252.4		5.08244	4123.74		13.0809	4228.8		6.08225	3998.34		14.0801	4116.15		7.08134	3989.96		15.0819	4044.53		8.0826	3846.48		16.0821	4149.65
1.08235	5220.02		9.08264	3997.04		2.08306	4622.19		10.0834	3814.11		3.08146	4366.73		11.0821	3901.26		4.08173	4313.7		12.0826	3964.25		5.08341	3956.58		13.0827	4015.15		6.08405	3880.62		14.0814	4080.04		7.08245	3915.74		15.0834	3879.92		8.08385	3673.1		16.0834	3980.46
1.08374	4912.74		9.08437	3821.43		2.08479	4296.38		10.0846	3508.93		3.0832	4202.01		11.0837	3788.58		4.08333	4097.72		12.0834	3846.64		5.08494	3810.27		13.0843	3772.55		6.08558	3671.12		14.0831	3958.97		7.08412	3745.82		15.0851	3721.59		8.08552	3533.59		16.0852	3801.25
1.08464	4688.08		9.08556	3592.78		2.0859	4068.74		10.0854	3359.11		3.08466	3952.65		11.0854	3629.17		4.08493	3907.97		12.0847	3764.36		5.08667	3647.63		13.0851	3590.43		6.08641	3499.22		14.0845	3730.05		7.08565	3548.91		15.0863	3513.93		8.08711	3311.28		16.0867	3618.3
1.08596	4550.82		9.08646	3416.13		2.08674	3984.52		10.0868	3311.39		3.08563	3787.55		11.0865	3407.49		4.08604	3708.46		12.0864	3536.39		5.08792	3408.59		13.0861	3544.73		6.08746	3439.91		14.0855	3475.25		7.08669	3321.7		15.0873	3390.98		8.08815	3036.17		16.0875	3300.34
1.0877	4353.56		9.08785	3311.77		2.0882	3855.44		10.0885	3214.32		3.08674	3621.93		11.0875	3208.47		4.08701	3502.35		12.0878	3286.45		5.08889	3197.75		13.0878	3364.47		6.08912	3258.33		14.0867	3344.59		7.08773	3182.5		15.0886	3198.49		8.0892	2942.57		16.0886	3210.55
1.08916	3949.08		9.08965	3132.35		2.08986	3621.8		10.0898	2972.84		3.08841	3466.64		11.0889	3023.22		4.08854	3474.45		12.0887	3122.11		5.09021	3106.41		13.0893	3133.05		6.09065	2930.32		14.0883	3240.78		7.08933	3137.68		15.0904	2996.69		8.09086	2857.17		16.0903	3157.67
1.09013	3762.89		9.09104	2884.98		2.09111	3372.4		10.0907	2734.81		3.09008	3293.46		11.0908	2853.47		4.09027	3219.99		12.0899	2992.04		5.09202	2936.85		13.0904	2949.06		6.09169	2739.75		14.0899	3027.4		7.09107	2924.89		15.0918	2840.57		8.09253	2625.7		16.0918	2920.54
1.09131	3644.91		9.09194	2757.23		2.09208	3137.71		10.0921	2658.22		3.09119	3033.47		11.0919	2673.39		4.09152	2956.7		12.0917	2848.68		5.09341	2731.25		13.0914	2792.36		6.09273	2628.29		14.091	2785.47		7.09218	2659.59		15.0928	2622.6		8.09364	2485.95		16.0928	2730.27
1.09312	3411		9.09326	2646.9		2.0934	3087.33		10.0938	2510.85		3.09216	2798.17		11.0929	2458.55		4.09249	2858.51		12.0933	2613.11		5.09431	2567.17		13.093	2713.31		6.09433	2581.9		14.092	2669.86		7.09315	2542.18		15.094	2540.04		8.09461	2370.56		16.0939	2654.52
1.09464	3149.35		9.09507	2392.62		2.09521	2852.02		10.0953	2271.93		3.09376	2674.61		11.0944	2396.21		4.09388	2743.89		12.0943	2413.48		5.09563	2468.43		13.0947	2491.38		6.09607	2356.47		14.0937	2556.51		7.09468	2484.99		15.0957	2365.53		8.09628	2230.55		16.0955	2497.71
1.09548	2771.99		9.09653	2253.98		2.0966	2620.1		10.0963	2101.21		3.09549	2427.8		11.0962	2210.53		4.09569	2556.76		12.0953	2313.73		5.09744	2307.86		13.0959	2224.11		6.09718	2158.59		14.0953	2293.3		7.09648	2305.82		15.0972	2113.66		8.09801	2033.82		16.0972	2306.87
1.09652	2737.71		9.09743	2098.68		2.09757	2361.4		10.0975	2013.29		3.09667	2168.18		11.0974	2045.31		4.09708	2292.06		12.097	2230.35		5.09882	2083.42		13.0968	2123.94		6.09815	1982.96		14.0965	2076.28		7.09766	2095.31		15.0982	2023.67		8.09906	1813.87		16.0983	2085.74
1.09826	2685.27		9.09868	2004.73		2.09875	2244.5		10.0992	1885.25		3.09758	2145.32		11.0982	1914.61		4.09798	2154.24		12.0987	2012.23		5.09966	1923.58		13.0984	2014.86		6.09961	1837.06		14.0974	2018.51		7.09857	1894.07		15.0994	1911.44		8.09989	1699.4		16.0993	1923.87
1.09978	2400.44		9.10049	1762.06		2.10056	2143.71		10.1008	1699.07		3.09917	2043.73		11.0995	1864.06		4.09923	2040.77		12.0998	1800.08		5.10077	1793.52		13.1002	1869.85		6.10141	1689.46		14.0991	1904.01		7.10009	1805.32		15.1011	1798.5		8.10142	1653.43		16.1007	1833.39
1.10076	2154.67		9.10194	1610.83		2.10208	1958.61		10.1018	1528.47		3.10098	1902.09		11.1012	1684.88		4.10104	1898.84		12.1007	1700.31		5.10251	1709.99		13.1014	1710.23		6.10259	1507.29		14.1008	1746.57		7.10197	1610.35		15.1027	1552.11		8.10308	1484.55		16.1026	1661.2
1.10187	2052.94		9.10278	1479.84		2.10306	1779.53		10.1029	1434.69		3.10209	1695.46		11.1026	1484.09		4.10249	1674.39		12.1024	1640.55		5.10396	1529.54		13.1023	1575.45		6.1035	1405.49		14.1018	1536.41		7.10315	1463.16		15.1036	1388.06		8.10426	1388.82		16.1037	1488.95
1.10346	1890.66		9.10382	1389.95		2.10417	1674.74		10.1046	1363.7		3.10292	1605.01		11.1035	1393.15		4.10326	1531.43		12.1041	1462.24		5.10494	1363.86		13.1038	1480.94		6.10502	1375.32		14.1026	1395.76		7.10391	1338.56		15.1046	1319.44		8.10517	1252.08		16.1046	1362.24
1.1052	1693.63		9.10549	1277.99		2.10597	1531.74		10.1063	1231		3.10431	1479.76		11.1048	1295.66		4.10444	1481.24		12.1052	1276.58		5.10605	1273.06		13.1056	1311.14		6.10683	1230.52		14.1042	1347.46		7.10523	1301.07		15.1062	1259.03		8.10663	1166.31		16.1062	1324.07
1.10631	1535.87		9.10708	1162.6		2.1075	1338.68		10.1072	1072.46		3.10598	1288.38		11.1065	1194.73		4.10611	1379.32		12.106	1170.08		5.10771	1212.18		13.1068	1134.7		6.10808	1060.65		14.1058	1214.71		7.10697	1208.63		15.1078	1105.14		8.10836	1040.01		16.108	1219.84
1.10721	1406.34		9.10812	1062.67		2.1084	1163.26		10.1081	1000.38		3.1073	1150.67		11.108	1043.95		4.10756	1186.22		12.1075	1144.33		5.10938	1093.78		13.1076	1070.12		6.10884	999.09		14.107	1147.15		7.10829	1096.02		15.1088	989.964		8.10975	913.834		16.1092	1063.06
1.10874	1313.27		9.10917	1000.15		2.10938	1103.75		10.1097	960.084		3.10827	1040.33		11.109	945.158		4.10854	1081.72		12.1091	1028.62		5.11049	957.063		13.1089	1018.25		6.11016	946.783		14.108	1034.03		7.10919	992.499		15.1099	946.055		8.11072	840.234		16.11	956.646
1.11055	1208.51		9.11076	928.516		2.11104	1007.04		10.1114	860.788		3.10952	987.981		11.1101	903.411		4.10965	1017.88		12.1103	925.576		5.11146	847.209		13.1106	909.421		6.1119	868.425		14.1094	957.418		7.11051	881.631		15.1114	848.614		8.11197	788.374		16.1113	895.246
1.11173	1029.6		9.1125	835.829		2.11257	928.889		10.1125	753.872		3.11126	914.786		11.1119	825.602		4.11131	958.193		12.1113	840.973		5.11306	826.616		13.112	783.915		6.11322	742.703		14.1112	869.347		7.11225	823.601		15.1132	745.593		8.11371	689.092		16.113	802.37
1.11263	942.918		9.11368	731.755		2.11368	831.722		10.1134	688.302		3.11278	824.4		11.1135	711.591		4.11305	861.295		12.1128	776.391		5.1148	736.896		13.1129	698.755		6.11419	644.566		14.1126	695.674		7.1137	707.857		15.1144	643.466		8.11524	593.014		16.1144	688.669
1.11416	882.031		9.11465	675.863		2.11472	757.23		10.115	668.577		3.11376	703.542		11.1145	630.087		4.11416	721.743		12.1145	696.706		5.11598	611.68		13.1141	659.511		6.11544	598.609		14.1135	637.17		7.11468	615.969		15.1153	604.734		8.11614	547.632		16.1153	661.494
1.11596	754.453		9.11611	624.305		2.11625	685.493		10.1168	580.983		3.11487	649.392		11.1155	562.83		4.11513	649.663		12.1159	599.149		5.11688	574.181		13.1158	612.575		6.11718	563.531		14.1148	614.364		7.11586	584.842		15.1168	574.795		8.11739	549.418		16.1165	582.558
1.11721	679.716		9.11792	562.144		2.11799	611.152		10.118	505.185		3.11667	597.651		11.1173	560.08		4.11666	612.295		12.1168	525.658		5.11848	534.936		13.1174	539.732		6.11871	501.105		14.1165	593.673		7.11752	539.207		15.1186	526.401		8.11919	482.316		16.1183	544.438
1.11798	635.026		9.11917	517.812		2.11917	540.531		10.1189	474.574		3.11827	532.064		11.1189	483.336		4.11847	569.964		12.1181	476.626		5.12021	489.65		13.1184	474.309		6.11975	423.543		14.118	507.442		7.11919	478.872		15.1199	473.307		8.12065	436.004		16.1198	472.218
1.1193	592.304		9.12007	501.152		2.12014	479.334		10.1203	469.823		3.11924	497.371		11.1199	428.437		4.11958	521.614		12.1198	434		5.12133	449.681		13.1195	450.903		6.12086	389.733		14.119	437.766		7.12023	409.354		15.1207	404.042		8.12149	389.539		16.1208	447.28
1.12103	523.263		9.12153	462.346		2.1216	437.707		10.1221	419.997		3.12028	473.369		11.1208	400.46		4.12048	459.943		12.1214	392.852		5.12216	386.992		13.1212	405.697		6.12252	368.642		14.1201	405.566		7.12127	369.247		15.1222	368.305		8.12253	363.632		16.1219	400.648
1.12235	461.863		9.12333	403.073		2.1234	400.696		10.1234	353.844		3.12209	436.135		11.1224	377.213		4.12208	431.632		12.1223	360.262		5.12355	375.143		13.1229	362.325		6.12412	332.058		14.1219	396.819		7.12294	382.143		15.1241	330.781		8.1242	340.346		16.1237	356.82
1.12326	429.234		9.12458	349.251		2.12465	353.504		10.1243	319.317		3.12376	371.102		11.1239	337.984		4.12388	397.982		12.1235	331.184		5.12528	356.778		13.1239	347.262		6.12516	298.7		14.1235	376.28		7.12461	336.06		15.1253	312.309		8.12579	319.258		16.1253	309.789
1.12451	417.51		9.12535	319.305		2.12563	327.543		10.1257	303.228		3.12459	341.664		11.1251	313.514		4.12499	349.057		12.1253	306.75		5.12653	325.553		13.1249	319.213		6.12621	284.43		14.1243	326.484		7.12558	277.544		15.1261	292.628		8.12676	295.503		16.1263	282.53
1.12631	363.652		9.12667	293.911		2.12701	304.209		10.1275	283.008		3.12549	341.577		11.1261	288.653		4.12576	315.595		12.1268	266.524		5.12751	305.843		13.1266	275.206		6.12794	252.48		14.1253	290.773		7.12655	271.543		15.1273	279.846		8.12781	254.174		16.1273	263.42
1.12784	334.632		9.1284	299.864		2.12882	271.83		10.1289	243.56		3.12709	299.416		11.1276	249.91		4.12722	308.151		12.1276	244.574		5.12882	261.505		13.1284	259.832		6.12961	238.529		14.127	268.415		7.12808	263.882		15.1291	263.247		8.12947	241.252		16.1291	268.674
1.12881	298.641		9.12972	256.787		2.13014	251.595		10.1297	217.039		3.12876	268.961		11.1294	245.657		4.12888	303.293		12.1287	246.28		5.13056	235.425		13.1293	224.119		6.13058	233.334		14.1285	238.064		7.12968	249.656		15.1304	224.119		8.13121	219.529		16.1307	240.617
1.12992	295.002		9.13069	235.079		2.1309	242.865		10.1309	220.006		3.1298	246.158		11.1307	220.516		4.13013	280.577		12.1304	239.591		5.13202	221.956		13.1302	209.899		6.13148	205.664		14.1295	236.197		7.13086	230.056		15.1314	217.253		8.13232	190.063		16.1317	214.003
1.13166	264.109		9.13194	210.895		2.13215	237.846		10.1325	222.076		3.13077	223.966		11.1316	215.13		4.13111	236		12.1319	213.302		5.13299	201.978		13.1317	210.454		6.13301	186.079		14.1306	228.163		7.13183	224.286		15.1326	209.103		8.13329	191.963		16.1326	204.572
1.13332	260.321		9.13368	218.112		2.13389	213.496		10.134	217.886		3.1323	214.035		11.1329	216.543		4.13243	220.423		12.133	205.05		5.13417	183.634		13.1333	195.05		6.13468	188.638		14.1322	219.899		7.13329	201.527		15.1343	203.183		8.13475	191.605		16.1342	198.444
1.13437	254.535		9.13528	203.463		2.13528	198.828		10.135	185.602		3.1341	181.904		11.1347	178.349		4.13416	218.601		12.134	186.532		5.13591	196.171		13.1345	187.391		6.13579	183.872		14.134	197.984		7.13509	200.83		15.1359	181.125		8.13656	179.918		16.1357	187.033
1.13541	233.155		9.13625	191.748		2.13625	180.63		10.1361	167.284		3.13535	177.359		11.1362	176.67		4.13569	191.477		12.1356	181.555		5.13751	175.262		13.1355	173.455		6.13676	177.406		14.1351	183.768		7.13634	165.268		15.1369	167.058		8.13781	156.062		16.1369	181.585
1.13714	220.814		9.13729	184.68		2.13743	180.305		10.1379	166.13		3.13626	164.147		11.1371	173.01		4.13666	174.466		12.1373	173.846		5.13848	147.506		13.137	151.195		6.13822	152.397		14.136	163.357		7.13725	144.941		15.138	154.144		8.13871	151.824		16.1379	176.762
1.13881	215.136		9.13903	182.62		2.13917	164.919		10.1396	166.363		3.13765	165.698		11.1384	165.173		4.13784	189.458		12.1384	163.944		5.13952	152.322		13.1387	139.125		6.14002	137.742		14.1376	173.094		7.13864	153.855		15.1396	156.139		8.14017	154.019		16.1394	162.104
1.13978	191.739		9.14069	175.313		2.14076	143.605		10.1406	159.348		3.13945	162.384		11.1402	159.584		4.13951	176.983		12.1394	139.743		5.14132	146.31		13.14	145.692		6.14134	127.166		14.1394	149.197		7.14044	138.991		15.1413	151.63		8.14197	154.711		16.1411	143.316
1.14069	186.127		9.14174	175.853		2.14181	146.936		10.1416	141.341		3.14084	138.389		11.1417	134.968		4.14111	157.329		12.1409	140.861		5.14292	133.05		13.1409	137.715		6.14225	127.453		14.1406	138.815		7.14183	132.114		15.1424	149.933		8.14322	127.026		16.1424	136.143
1.14221	170.792		9.14278	179.071		2.14285	153.202		10.1432	134.801		3.14174	147.816		11.1425	121.026		4.14208	154.786		12.1427	138.848		5.14376	137.789		13.1422	117.474		6.14357	120.71		14.1415	134.181		7.14266	132.013		15.1434	141.001		8.14406	128.291		16.1433	135.505
1.14388	159.745		9.14444	155.892		2.14445	136.092		10.145	131.55		3.14306	140.121		11.1436	126.689		4.14319	133.548		12.1439	127.837		5.14473	118.786		13.144	118.365		6.14537	117.718		14.1429	133.271		7.14398	125.908		15.145	124.08		8.14538	118.604		16.1447	129.149
1.14506	159.984		9.14611	147.849		2.14618	127.852		10.1461	133.56		3.14487	130.614		11.1453	111.554		4.14493	145.493		12.1448	113.385		5.14632	127.927		13.1455	112.514		6.14676	107.757		14.1448	121.601		7.14579	112.258		15.1467	118.604		8.14704	115.95		16.1465	121.163
1.14603	146.963		9.14708	134.783		2.14722	119.534		10.147	117.668		3.14626	112.383		11.1468	108.458		4.14659	132.704		12.1464	102.78		5.14792	117.793		13.1464	102.723		6.14766	97.1074		14.146	118.336		7.14725	111.211		15.1477	120.262		8.14836	118.705		16.1479	120.948
1.14749	168.227		9.14799	140.032		2.1482	125.111		10.1486	96.9165		3.14709	126.787		11.1478	106.394		4.14743	124.458		12.1482	113.006		5.14903	114.327		13.1477	107.775		6.14891	93.0992		14.1467	118.598		7.14808	111.619		15.1486	111.142		8.14933	109.15		16.1488	112.12
1.1493	163.199		9.14951	132.585		2.14986	106.663		10.1504	99.5499		3.1482	127.67		11.1489	90.6298		4.1484	127.02		12.1493	118.473		5.15001	103.033		13.1495	113.722		6.15079	97.7516		14.1481	121.521		7.14919	107.617		15.15	101.942		8.15058	94.3726		16.1501	116.287
1.15062	145.159		9.15118	131.386		2.1516	92.7532		10.1514	103.439		3.14994	122.263		11.1506	95.485		4.14999	128.732		12.1502	117.867		5.15153	97.1492		13.151	105.058		6.15218	108.658		14.1498	114.384		7.15086	109.916		15.1518	101.709		8.15232	89.6665		16.1519	87.4835
1.15152	130.832		9.15236	131.437		2.15264	99.7647		10.1523	102.395		3.1514	104.915		11.1523	89.5651		4.15159	123.236		12.1514	98.5031		5.15327	78.3575		13.1518	94.9422		6.15301	95.1928		14.1511	96.7823		7.15232	87.06		15.1529	99.1324		8.15385	91.5841		16.1533	92.0464
1.15291	139.525		9.15333	141.455		2.15347	114.819		10.1536	93.7374		3.15237	88.0501		11.1534	94.4352		4.15263	121.038		12.1532	93.5227		5.15452	94.313		13.1529	100.367		6.15412	94.8349		14.1521	92.4371		7.15336	85.0618		15.1538	89.6248		8.15482	93.6032		16.1541	96.5915
1.15471	149.561		9.15479	133.784		2.155	100.242		10.1554	79.8308		3.15348	96.1889		11.1544	97.5398		4.15368	111.461		12.1546	77.4927		5.15542	91.6885		13.1545	88.8464		6.15579	88.4825		14.1533	99.192		7.15447	95.8071		15.1553	96.2664		8.15593	88.9329		16.1552	94.1668
1.1561	139.662		9.15653	126.928		2.15667	85.0708		10.1566	86.9049		3.15521	106.845		11.156	98.0886		4.1552	116.594		12.1555	78.3307		5.15688	86.6395		13.1561	79.2821		6.15725	82.8191		14.1551	101.023		7.15614	94.6768		15.157	88.3185		8.15767	88.1992		16.1569	87.3701
1.15701	121.243		9.15785	126.456		2.15785	85.7537		10.1576	87.6385		3.15688	110.784		11.1577	95.2613		4.15694	120.059		12.1567	85.5927		5.15869	93.8984		13.157	95.4254		6.15829	76.9827		14.1567	89.3146		7.1578	74.0421		15.1584	91.101		8.15933	90.8386		16.1584	84.5011
1.15826	127.858		9.15875	139.331		2.15882	84.5071		10.1589	86.0847		3.15792	101.247		11.1589	84.1671		4.15819	110.403		12.1584	79.792		5.16001	79.5743		13.1581	88.9448		6.1594	78.2711		14.1576	72.2587		7.15884	88.4915		15.1594	103.153		8.16031	101.652		16.1594	84.7934
1.16006	124.065		9.16014	135.746		2.16021	82.7863		10.1607	89.9319		3.1589	94.7991		11.1598	74.9666		4.15909	103.203		12.16	75.7898		5.16084	80.4929		13.1597	72.6196		6.161	83.9882		14.1587	75.0382		7.15988	83.9941		15.1606	96.6809		8.16135	100.489		16.1605	75.4468
1.16152	143.524		9.16194	135.711		2.16201	94.0177		10.1622	101.339		3.16056	104.826		11.1613	70.9017		4.16055	109.744		12.161	79.2821		5.16223	88.5601		13.1615	66.3805		6.16266	78.7959		14.1604	64.8476		7.16141	77.3823		15.1624	81.1997		8.16308	77.949		16.1621	72.3154
1.16228	148.991		9.16333	129.033		2.1634	93.3586		10.1631	102.544		3.1623	96.4752		11.1631	80.8776		4.16236	98.3838		12.1621	78.4768		5.1641	87.2121		13.1626	75.6854		6.16377	74.3672		14.1621	71.1493		7.16315	75.751		15.1639	93.6569		8.16475	71.3014		16.1638	74.6953
1.16339	123.918		9.16424	117.951		2.16431	81.7574		10.1643	87.5968		3.16341	94.0625		11.1643	86.0549		4.16368	86.1533		12.1639	69.4165		5.16542	88.2529		13.1636	69.503		6.16482	87.9397		14.1631	68.7545		7.16433	77.1258		15.1648	99.0131		8.16572	74.4418		16.1649	73.0908
1.16513	121.276		9.16556	128.777		2.16556	80.1589		10.1661	86.2488		3.16431	84.9455		11.1651	86.5679		4.16458	100.972		12.1655	69.2853		5.16626	76.8097		13.1651	64.2601		6.16634	86.2189		14.1641	73.392		7.16523	80.132		15.166	82.4672		8.16663	75.2977		16.166	89.8484
1.16659	125.708		9.16736	131.592		2.16736	71.5071		10.1676	90.9907		3.16591	83.5915		11.1664	84.1313		4.16597	98.9535		12.1665	73.8304		5.16744	76.7769		13.1669	74.4954		6.16808	74.9666		14.1658	76.255		7.16683	74.394		15.1678	86.3442		8.16815	84.2208		16.1675	83.3261
1.16763	121.184		9.16882	127.611		2.16889	71.6324		10.1686	76.9708		3.16771	84.8709		11.1681	72.0291		4.16777	83.1889		12.1675	78.0444		5.1691	74.7042		13.1681	83.3619		6.16926	75.4975		14.1675	83.1889		7.16864	75.7808		15.1693	86.89		8.16982	78.6647		16.1692	77.9758
1.16874	127.775		9.16958	112.705		2.16979	82.2674		10.1698	69.7804		3.16883	97.9872		11.1694	69.3151		4.16916	83.6363		12.1692	81.9453		5.17056	75.3126		13.169	67.8687		6.17016	81.0178		14.1685	74.576		7.16975	82.4314		15.1702	86.5768		8.17093	70.7467		16.1704	80.1827
1.17041	128.836		9.17069	116.68		2.17097	73.9377		10.1715	77.2153		3.16959	94.1311		11.1704	64.9818		4.16993	80.0217		12.1709	82.5149		5.1716	70.9703		13.1705	68.3668		6.17169	70.6333		14.1694	73.0967		7.17058	76.7948		15.1713	81.1162		8.17197	75.8106		16.1713	72.4525
1.17207	115.088		9.17243	115.258		2.17278	74.7072		10.1731	78.1339		3.17105	91.0414		11.1717	61.8951		4.17118	84.7188		12.1719	75.6138		5.17271	69.6551		13.1724	77.269		6.1735	61.746		14.1709	81.1699		7.17197	68.9602		15.1729	76.8216		8.17336	79.5743		16.1728	67.5914
1.17319	114.623		9.17389	115.115		2.17438	81.483		10.174	72.5659		3.17278	77.3346		11.1735	71.2477		4.17284	89.1535		12.1728	75.247		5.17438	81.9214		13.1736	70.5588		6.17468	69.5806		14.1726	78.6945		7.17364	72.7955		15.1744	83.9762		8.1751	70.5796		16.1747	80.3587
1.17416	116.624		9.17493	118.207		2.17521	84.2417		10.175	81.7514		3.17403	85.3213		11.175	74.2718		4.1743	98.8491		12.1743	76.762		5.17605	68.3519		13.1743	60.8245		6.17544	72.0112		14.1737	74.5938		7.17495	73.2995		15.1754	93.6509		8.17649	73.2578		16.1758	75.578
1.17569	113.618		9.17597	112.869		2.17625	69.5		10.1766	76.3385		3.17501	81.5069		11.1759	72.536		4.1752	98.8163		12.176	65.6767		5.17709	73.4188		13.1756	63.3893		6.17683	70.3291		14.1746	80.5764		7.17586	71.9336		15.1765	91.0473		8.17739	74.233		16.1766	63.4549
1.17742	112.508		9.17764	131.497		2.17792	78.9093		10.1782	83.8569		3.17633	90.4747		11.1771	68.9513		4.17638	111.551		12.1772	63.4758		5.17813	77.3197		13.1774	63.3237		6.17857	74.057		14.1761	74.6296		7.17718	76.5055		15.1781	81.1609		8.17871	80.4303		16.178	62.9479
1.1786	119.075		9.17931	123.453		2.17945	72.2945		10.1793	80.3348		3.17806	89.8961		11.1788	76.3594		4.17805	99.4127		12.1782	61.3613		5.17973	76.0999		13.1787	66.5953		6.17982	75.3096		14.1779	75.8285		7.17898	74.5819		15.1798	86.9287		8.18051	84.531		16.1797	69.8877
1.17957	120.292		9.18042	133.435		2.18049	62.2858		10.1802	78.8377		3.17952	87.1047		11.1804	78.948		4.17972	92.5266		12.1796	67.3021		5.18146	68.4443		13.1797	62.3604		6.18086	64.6985		14.1792	79.3715		7.18044	72.715		15.181	91.3008		8.18197	79.1717		16.181	72.6852
1.1811	125.034		9.18139	128.866		2.18153	68.7097		10.1818	77.4211		3.18042	88.0411		11.1814	82.7565		4.18076	93.4809		12.1814	80.1022		5.18257	67.5615		13.1809	66.8338		6.18211	68.0327		14.1801	76.9797		7.18134	75.6824		15.182	79.0375		8.18281	82.4493		16.1819	76.8067
1.18291	133.331		9.18299	125.94		2.18313	71.3103		10.1836	75.2261		3.1816	85.7418		11.1825	73.228		4.1818	94.9094		12.1827	79.622		5.18355	66.3776		13.1827	69.0974		6.18384	77.4092		14.1815	74.4656		7.18252	79.1926		15.1834	77.9102		8.18412	78.5753		16.1832	74.1018
1.18402	131.019		9.18472	114.089		2.18486	72.2647		10.1848	71.8322		3.18341	83.1084		11.1842	71.9098		4.1834	109.69		12.1837	72.9178		5.18514	76.5264		13.1842	66.5416		6.18537	74.3791		14.1833	72.9834		7.18426	65.125		15.1852	83.511		8.186	75.6228		16.1851	82.497
1.18485	119.156		9.1859	128.043		2.18604	69.7297		10.1857	80.7374		3.18494	85.205		11.1859	65.3994		4.18513	100.176		12.185	67.6838		5.18688	77.4151		13.1852	69.9116		6.18634	65.292		14.1846	80.985		7.18586	70.4186		15.1865	78.8049		8.18746	75.9926		16.1865	72.4734
1.18624	112.207		9.18687	125.762		2.18701	73.7946		10.1872	71.3789		3.18591	93.6211		11.1867	78.1309		4.18624	91.8794		12.1868	80.1469		5.18799	65.5336		13.1863	65.9749		6.18752	75.3901		14.1856	85.8998		7.18683	71.194		15.1874	80.7673		8.18822	76.5562		16.1875	75.1694
1.18791	113.4		9.1884	129.513		2.18847	84.185		10.189	79.2522		3.18702	93.1499		11.1877	77.7849		4.18722	94.9243		12.1882	80.2573		5.18876	67.8777		13.188	73.8095		6.18919	65.295		14.1869	78.62		7.18794	79.1121		15.1888	84.6115		8.18933	66.0972		16.1887	72.0798
1.18923	118.091		9.19021	119.797		2.19028	78.1786		10.1903	77.0185		3.18883	90.7879		11.1893	71.7845		4.18881	91.5633		12.1891	69.5329		5.19021	80.0455		13.1896	69.0855		6.19079	62.429		14.1887	77.0841		7.18968	81.7902		15.1906	79.6071		8.191	80.3289		16.1904	79.8278
1.1902	103.901		9.19139	125.52		2.19153	72.5211		10.1911	75.4647		3.19042	93.0693		11.191	70.8689		4.19062	85.9058		12.1904	65.4918		5.19188	78.4321		13.1906	65.1071		6.19183	61.4657		14.1901	77.6806		7.19134	70.4007		15.1919	82.327		8.19253	79.4699		16.1919	74.2211
1.19152	110.42		9.19215	139.26		2.19243	75.912		10.1925	80.1022		3.19133	92.8695		11.1921	71.5161		4.19166	94.7037		12.1922	63.8098		5.19313	74.9816		13.1917	62.6735		6.19287	74.4209		14.1909	83.4156		7.19225	72.5331		15.1927	81.9602		8.19357	84.7636		16.1929	72.0082
1.19326	114.596		9.19354	127.924		2.19396	73.8334		10.1944	80.5078		3.1923	84.0031		11.193	69.843		4.19249	90.4091		12.1937	75.8047		5.1941	79.0733		13.1934	73.1265		6.19461	75.8733		14.192	70.3202		7.19315	80.4243		15.194	74.5461		8.19461	85.7835		16.194	76.3445
1.19478	105.24		9.19521	123.895		2.19576	84.2924		10.1957	76.2968		3.1939	97.1611		11.1946	62.2321		4.19395	99.541		12.1945	79.3954		5.19549	85.4525		13.1951	71.0181		6.19627	70.2098		14.1937	71.2447		7.19475	77.8983		15.1957	81.0744		8.19628	81.3339		16.1957	79.3715
1.19576	106.916		9.19653	114.459		2.19701	78.3993		10.1965	79.1687		3.19549	96.5408		11.1963	57.8451		4.19562	98.6672		12.1956	68.9274		5.19723	72.9625		13.196	71.9455		6.19718	56.6761		14.1952	69.7088		7.19641	70.9763		15.197	84.6681		8.19794	88.5511		16.1974	64.5792
1.19694	121.437		9.19743	120.08		2.19785	63.5861		10.1977	69.2913		3.1966	97.2595		11.1976	69.4911		4.1968	93.5763		12.1973	62.5154		5.19862	79.0405		13.1969	70.7974		6.19808	55.7158		14.1962	67.8777		7.19752	74.8354		15.198	83.4484		8.19906	85.1572		16.1983	72.1245
1.1986	114.414		9.19875	133.915		2.1991	57.6453		10.1994	68.7962		3.19758	93.5406		11.1985	66.6698		4.19777	93.2811		12.1989	66.9591		5.19959	83.3768		13.1985	78.617		6.19968	62.2411		14.1973	62.8942		7.1985	68.3817		15.1993	78.7602		8.20003	79.4342		16.1992	75.4945
1.2002	115.786		9.20049	126.808		2.20083	70.2337		10.2009	78.4202		3.19917	98.7507		11.1999	64.7015		4.19916	97.9067		12.1998	64.7134		5.20077	82.8012		13.2002	87.1435		6.20134	67.2037		14.199	71.6384		7.20002	71.8233		15.2009	77.3823		8.20156	80.3885		16.2008	74.4954
1.20124	121.879		9.20201	122.603		2.20215	70.5111		10.2018	75.077		3.20091	92.8785		11.2017	64.2959		4.20097	106.743		12.2009	58.6504		5.20257	76.2818		13.2013	81.0476		6.20246	60.1803		14.2007	80.141		7.20176	67.4601		15.2025	90.0661		8.20336	78.9242		16.2025	69.1153
1.20235	129.818		9.20299	129.627		2.20313	66.3119		10.203	73.8691		3.20209	89.07		11.203	73.1057		4.20236	97.9812		12.2025	56.184		5.2041	77.6955		13.2022	74.734		6.20343	66.3388		14.2018	71.7189		7.20301	71.3312		15.2035	81.313		8.20454	76.3355		16.2036	69.4493
1.20402	126.734		9.2041	122.43		2.20438	69.9772		10.2047	85.0469		3.20299	79.4908		11.2039	71.2835		4.20333	104.721		12.2043	75.6287		5.20507	80.985		13.2038	67.0009		6.20496	72.9804		14.2027	67.9492		7.20391	74.8116		15.2046	70.3381		8.20551	79.127		16.2046	71.9217
1.20569	118.729		9.20583	118.702		2.20611	73.1653		10.2063	95.8489		3.20445	75.0472		11.2053	66.3686		4.20451	94.3577		12.2054	81.1371		5.20626	71.862		13.2056	78.5096		6.20669	72.9327		14.2043	72.035		7.2053	68.996		15.2063	82.5238		8.20697	86.0639		16.2061	74.2181
1.20666	123.45		9.20743	122.332		2.20771	69.5925		10.2073	74.5909		3.20626	76.5025		11.2072	69.3748		4.20624	80.1648		12.2064	73.4248		5.20799	68.8081		13.2068	75.6973		6.20794	74.6028		14.206	71.9485		7.20711	61.8146		15.208	86.5112		8.20878	72.3273		16.2078	78.954
1.20756	116.961		9.20847	125.32		2.20868	77.0394		10.2084	73.9735		3.20758	75.9896		11.2085	68.6978		4.20777	91.0145		12.2079	72.9327		5.20959	69.7983		13.2077	64.442		6.20891	61.1078		14.2072	75.42		7.20843	69.6462		15.209	82.503		8.20996	77.433		16.2092	57.6483
1.20916	104.668		9.20951	124.39		2.20979	77.2929		10.21	82.0526		3.20848	82.9384		11.2094	68.2713		4.20875	90.7103		12.2097	88.5929		5.21042	73.6485		13.2091	61.4955		6.2103	71.367		14.2081	64.3943		7.20933	72.7597		15.21	91.2859		8.21072	79.9769		16.2101	75.3245
1.21082	118.503		9.21125	126.009		2.21146	78.0951		10.2118	78.6051		3.20987	95.3926		11.2105	67.2722		4.20993	87.0689		12.2109	87.1614		5.21139	64.3347		13.2109	79.2612		6.21204	73.4307		14.2097	71.5608		7.21065	73.0371		15.2117	76.2669		8.21211	76.7083		16.2114	80.129
1.21194	120.083		9.21292	123.596		2.21313	76.2908		10.2129	80.4392		3.21174	91.7512		11.2122	62.2172		4.21173	105.72		12.2118	73.55		5.21306	73.8006		13.2123	72.2826		6.21343	69.9474		14.2115	74.8951		7.21252	70.9465		15.2134	81.9393		8.21378	65.4322		16.2132	70.2904
1.21291	115.774		9.21389	127.939		2.2141	60.6008		10.2139	81.0804		3.21306	94.6351		11.2137	57.6871		4.21333	98.3868		12.2133	64.281		5.21459	85.8283		13.2132	73.8751		6.21433	67.5615		14.2126	65.6827		7.21391	73.8304		15.2144	78.7691		8.2151	72.3392		16.2145	70.4037
1.21444	108.255		9.21479	132.385		2.21514	79.9382		10.2155	77.776		3.21383	93.8954		11.2147	70.4454		4.21409	95.3956		12.2151	74.6893		5.2157	71.5966		13.2145	78.614		6.21565	71.0508		14.2135	64.4987		7.21468	69.4255		15.2152	65.9749		8.21607	86.0519		16.2154	71.7189
1.21624	105.371		9.21639	120.158		2.21688	91.2263		10.2172	75.5273		3.21508	81.7783		11.2158	66.4432		4.21513	101.333		12.2163	69.4911		5.21667	69.2704		13.2163	72.6792		6.21746	70.2933		14.2149	59.9208		7.21586	82.0347		15.2168	72.9327		8.21739	101.509		16.2168	65.9809
1.21749	110.337		9.21799	115.902		2.21861	81.4442		10.2182	75.4826		3.21674	75.6824		11.2176	77.8386		4.2168	87.9576		12.2171	69.7863		5.21827	77.3972		13.2177	75.2351		6.21884	83.5915		14.2165	60.7141		7.21759	74.8891		15.2184	79.4043		8.21913	81.9542		16.2186	67.824
1.21839	109.171		9.2191	126.919		2.21952	71.5459		10.2191	83.7227		3.2182	81.8767		11.2192	74.4954		4.21833	92.3924		12.2184	69.2585		5.22001	82.4582		13.2185	82.2047		6.21968	69.8609		14.2178	62.3156		7.21905	79.127		15.2196	92.4639		8.22058	72.6941		16.22	73.4785
1.21978	105.956		9.22007	139.14		2.22042	79.8815		10.2205	81.3965		3.21917	80.1261		11.2203	63.4191		4.21937	107.423		12.2201	72.3511		5.22126	87.901		13.2197	71.2924		6.22079	69.3271		14.2188	69.8192		7.22002	70.3888		15.2206	94.1072		8.22156	69.7863		16.2207	74.1316
1.22159	114.309		9.2216	136.045		2.22195	70.0309		10.2223	71.7398		3.22035	79.121		11.2212	58.7637		4.22041	103.269		12.2214	78.9987		5.22216	71.3133		13.2214	67.9492		6.22252	67.7375		14.2201	75.4587		7.22114	70.4425		15.222	79.5385		8.22274	83.3082		16.2219	62.7302
1.22291	126.823		9.22333	134.846		2.22361	66.9621		10.2234	64.785		3.22202	85.706		11.2229	68.7396		4.22201	80.7852		12.2224	75.3305		5.22362	77.6835		13.2229	68.6203		6.22398	65.3487		14.2218	70.4782		7.22287	74.063		15.2238	71.6622		8.2244	89.3355		16.2237	60.2489
1.22381	122.866		9.22465	134.95		2.22479	73.052		10.2244	60.6545		3.22362	86.5768		11.2246	74.06		4.22374	81.8349		12.2237	84.7278		5.22542	70.4544		13.2238	71.0091		6.22496	64.281		14.2233	64.9639		7.22454	74.3046		15.2252	81.2593		8.226	80.4839		16.2251	60.3473
1.2252	115.225		9.22556	137.252		2.22576	77.0394		10.2258	80.6331		3.22466	93.0395		11.2258	59.0768		4.22493	89.3056		12.2255	73.7677		5.22667	75.3305		13.2249	75.4498		6.22607	71.5519		14.2243	67.5198		7.22558	73.6634		15.2261	90.7044		8.22704	91.1607		16.2261	69.6999
1.22701	109.353		9.22687	132.561		2.22722	80.1678		10.2276	86.884		3.2257	96.9911		11.2267	60.4755		4.22583	92.7234		12.2269	70.5588		5.22757	75.6287		13.2266	65.2711		6.2278	72.2289		14.2255	70.5677		7.22655	75.748		15.2274	90.1646		8.22808	81.1401		16.2272	70.7616
1.22832	104.954		9.22868	117.256		2.22896	67.1768		10.229	78.3367		3.22737	88.6615		11.2283	70.4395		4.22729	92.7801		12.2279	64.776		5.22903	73.4695		13.2283	72.8522		6.22947	76.8127		14.2271	79.4193		7.22815	70.7795		15.2291	87.5908		8.22982	72.536		16.2289	62.3335
1.22916	98.3868		9.23007	122.072		2.23028	69.9355		10.2299	73.5113		3.2291	91.2501		11.23	66.4402		4.22909	82.661		12.2291	77.952		5.23084	62.5751		13.2294	78.2919		6.23058	58.7995		14.2287	66.0555		7.22989	81.7604		15.2306	83.2635		8.23149	78.3009		16.2306	67.5377
1.23034	114.566		9.23097	125.732		2.23118	74.1376		10.2311	79.1568		3.23015	88.3185		11.2311	67.8031		4.23041	89.4816		12.2308	80.2155		5.23209	82.1988		13.2304	80.2603		6.23155	65.0057		14.2298	65.125		7.231	86.9675		15.2315	76.6039		8.23246	88.9329		16.2317	69.0676
1.23201	110.248		9.23229	139.027		2.2325	72.1394		10.233	75.7063		3.23112	82.5954		11.2319	63.0612		4.23131	102.186		12.2324	69.8609		5.23285	82.5417		13.232	71.4773		6.23308	59.7717		14.2308	71.4236		7.23197	74.3135		15.2327	72.8462		8.23336	86.3531		16.2326	74.3165
1.23346	121.148		9.23417	133.414		2.23431	72.6046		10.2345	75.25		3.23278	98.023		11.2333	65.0295		4.23277	99.9555		12.2334	67.994		5.2341	72.8939		13.2337	75.8017		6.23482	80.2245		14.2326	70.4872		7.23357	72.8045		15.2345	86.1653		8.23496	76.422		16.2342	79.3894
1.23451	124.205		9.23556	129.683		2.23576	75.3364		10.2354	77.5851		3.23452	107.068		11.2351	79.3566		4.23458	96.162		12.2345	77.6269		5.23584	76.0015		13.2349	76.9678		6.236	78.9987		14.2342	64.9818		7.23537	71.4236		15.236	80.4541		8.23656	71.6861		16.236	70.01
1.23562	132.03		9.23632	137.246		2.23667	76.428		10.2366	82.5626		3.23556	88.8464		11.2363	79.962		4.23583	98.518		12.2362	75.5333		5.23723	66.7593		13.2358	64.4331		6.2369	63.6308		14.2351	68.322		7.23641	70.3321		15.2368	84.853		8.23767	76.4429		16.2371	63.6845
1.23728	125.079		9.2375	131.207		2.23792	68.5189		10.2384	77.3585		3.2364	78.4351		11.2373	81.1371		4.23666	93.0186		12.2378	71.2954		5.2382	69.5627		13.2374	78.2979		6.2385	73.7648		14.236	69.008		7.23725	74.3254		15.2379	87.4387		8.23864	77.4867		16.238	67.4422
1.23895	124.202		9.23917	128.425		2.23972	77.3316		10.2399	81.2922		3.23785	86.7915		11.2386	77.2302		4.23791	87.4745		12.2388	69.1541		5.23938	72.3333		13.2391	67.0009		6.2403	76.2669		14.2376	69.9802		7.23864	78.5544		15.2396	93.1349		8.24017	82.6909		16.2396	63.2252
1.23999	120.969		9.24062	140.214		2.24118	77.8088		10.2407	79.1121		3.23959	80.9074		11.2404	75.0263		4.23958	96.5139		12.2397	58.9963		5.24112	68.1491		13.2403	67.9284		6.24141	71.358		14.2393	59.393		7.24037	85.0708		15.2411	89.1893		8.2419	81.6113		16.2414	57.9913
1.24103	127.858		9.2416	135.335		2.24201	78.5126		10.2418	70.5886		3.24077	89.3027		11.2419	70.5677		4.24097	94.975		12.2412	74.8324		5.24271	64.7343		13.2411	62.3902		6.24218	63.2073		14.2403	69.3151		7.24162	69.3897		15.2421	74.0123		8.24322	79.6936		16.2426	68.1312
1.24263	128.857		9.24278	134.95		2.24313	63.6696		10.2434	78.283		3.24174	99.2666		11.2428	60.4457		4.24194	91.0175		12.2429	68.6352		5.24376	83.1889		13.2425	66.2941		6.24364	68.2296		14.2413	79.5385		7.24259	73.0132		15.2432	63.4817		8.24413	68.1491		16.2433	66.5028
1.24437	130.647		9.24444	136.432		2.24479	72.4973		10.245	86.8244		3.24313	92.4252		11.2439	63.4042		4.24312	84.862		12.244	69.5537		5.2448	75.1396		13.2442	80.8001		6.2453	66.977		14.2428	70.4216		7.24391	79.4342		15.2448	77.7969		8.24545	65.9451		16.2448	67.1082
1.24555	114.011		9.24611	135.046		2.24632	86.7379		10.2461	83.2217		3.24494	94.0118		11.2458	73.902		4.24486	91.107		12.245	68.9453		5.24646	86.1653		13.2455	80.2662		6.24655	66.1032		14.2446	74.7489		7.24565	73.7677		15.2466	83.9673		8.24725	73.3771		16.2464	71.6503
1.24645	103.32		9.24715	128.106		2.24729	75.6377		10.2471	83.6422		3.24633	90.7372		11.2473	74.3911		4.24645	91.5185		12.2465	68.7097		5.24813	71.4236		13.2465	77.9639		6.24752	81.3637		14.2459	76.1327		7.24711	62.9807		15.2477	98.0796		8.24864	89.0402		16.2477	80.0813
1.24805	113.865		9.24819	126.877		2.2484	68.5546		10.2486	78.4947		3.24723	97.3848		11.2483	60.9139		4.24749	91.2799		12.2483	67.9582		5.24917	74.9159		13.2478	69.8371		6.24884	70.3858		14.2468	65.1637		7.24801	74.4		15.2486	78.113		8.24954	89.3355		16.2487	79.1538
1.24978	122.69		9.24972	122.415		2.25	83.2664		10.2504	74.898		3.24848	97.7247		11.2494	61.4895		4.24854	90.5552		12.2496	74.4596		5.25014	84.1522		13.2495	78.1876		6.25058	66.1777		14.2482	59.3154		7.24926	79.1777		15.2502	71.5519		8.25086	85.1871		16.25	70.8063
1.25089	108.661		9.25146	116.752		2.25174	82.5209		10.2516	79.7085		3.25021	94.0207		11.2511	76.9857		4.25013	90.2689		12.2505	76.264		5.25181	67.1589		13.251	78.1488		6.25204	77.5642		14.25	65.7453		7.251	63.4489		15.2519	77.9341		8.25267	87.3463		16.2518	67.3915
1.25173	107.006		9.25264	122.198		2.25285	74.394		10.2526	80.3139		3.25174	80.1618		11.2527	75.0233		4.25187	96.2813		12.2518	80.305		5.25355	60.4696		13.2519	70.9614		6.25301	76.4548		14.2514	68.0029		7.25252	76.2669		15.2531	81.7812		8.25406	77.0602		16.2532	70.7258
1.25312	110.701		9.25361	121.849		2.25382	71.1791		10.2541	76.252		3.25265	81.3399		11.2536	72.7657		4.25291	94.8498		12.2537	66.816		5.25459	65.3904		13.2531	77.5523		6.25419	67.5526		14.2523	64.442		7.2535	79.4222		15.254	80.5108		8.25489	68.0268		16.2542	83.2963
1.25485	112.422		9.25514	126.364		2.25535	74.6863		10.2559	76.2192		3.25383	95.8847		11.2546	61.4925		4.25388	101.846		12.255	63.6875		5.25542	90.2749		13.2548	76.2252		6.25593	66.7325		14.2536	60.404		7.25461	81.2832		15.2555	76.2401		8.256	76.7441		16.2553	69.0229
1.2561	114.5		9.25694	131.058		2.25715	68.1073		10.2571	70.2009		3.25563	90.8087		11.2562	72.7031		4.25562	98.0916		12.2559	63.0582		5.25695	76.5562		13.2564	64.5703		6.25752	63.6964		14.2554	55.7694		7.25641	67.7405		15.2574	70.2456		8.25774	85.6314		16.2571	72.1096
1.25707	129.713		9.25805	123.471		2.25833	82.4493		10.258	76.4966		3.25723	85.8432		11.2578	83.0487		4.25736	89.8335		12.2573	65.6737		5.25862	70.0011		13.2574	65.5753		6.2585	67.2782		14.2568	65.7036		7.25794	62.3514		15.2586	80.5704		8.2592	81.7007		16.2586	74.2598
1.25839	119.251		9.25889	124.721		2.25931	87.7012		10.2594	74.898		3.25806	75.4736		11.2589	69.0974		4.25833	86.1444		12.2591	66.8547		5.25973	77.6865		13.2585	75.6436		6.25961	68.2803		14.2576	72.5957		7.25884	74.5879		15.2593	83.9136		8.26017	79.9322		16.2596	73.5948
1.2602	99.368		9.26028	129.314		2.26083	67.5675		10.2613	70.0041		3.2591	77.8118		11.2599	79.3566		4.25916	90.9608		12.2605	81.149		5.2607	83.2635		13.2602	70.8809		6.26134	66.8786		14.2588	69.005		7.25982	77.2511		15.2606	81.9155		8.26128	76.8723		16.2607	74.8474
1.26166	96.1143		9.26194	129.522		2.26264	76.7262		10.2625	67.5407		3.26077	87.7847		11.2614	80.9969		4.26069	87.394		12.2614	73.0043		5.26216	72.0589		13.2619	79.7145		6.26294	63.932		14.2605	66.5088		7.26148	78.5753		15.2624	78.9689		8.26295	75.5243		16.2625	66.7354
1.26256	108.792		9.26319	129.967		2.26382	76.8216		10.2633	70.9345		3.2623	85.5718		11.2633	71.2835		4.26236	84.2745		12.2625	73.0669		5.26389	70.1263		13.2628	78.5753		6.26377	69.2823		14.2619	66.9889		7.26301	69.4881		15.2637	75.4766		8.26461	69.0378		16.2641	75.4945
1.26374	107.441		9.26417	152.796		2.26458	69.9921		10.2646	67.7315		3.26334	78.2472		11.2644	74.9159		4.26354	93.3765		12.2642	74.5909		5.26528	63.4251		13.2637	77.952		6.26475	69.5418		14.2629	71.2089		7.26412	68.6918		15.2646	76.932		8.26572	79.3507		16.2649	70.5468
1.26555	108.13		9.26549	135.97		2.26597	69.1511		10.2663	73.4636		3.26438	90.1168		11.2653	72.3183		4.26451	96.5437		12.2657	80.5704		5.26626	64.8118		13.2653	70.5975		6.26641	69.4971		14.264	81.5725		7.26516	69.5		15.2659	79.3149		8.2667	78.5126		16.2659	69.2913
1.26707	112.493		9.26729	116.513		2.26771	72.721		10.2676	80.302		3.26598	93.129		11.2668	62.8405		4.26597	89.7828		12.2667	66.8846		5.26751	76.091		13.267	65.2443		6.26794	68.9334		14.2657	72.706		7.26669	69.7863		15.2677	80.5764		8.26829	71.6712		16.2676	69.6432
1.26805	100.131		9.26875	123.62		2.26903	82.661		10.2686	57.8034		3.26771	83.9583		11.2686	67.1261		4.2677	84.7785		12.2678	68.0775		5.26924	84.3222		13.2681	79.6549		6.26905	65.9272		14.2674	57.4694		7.26843	71.1791		15.2692	80.6569		8.27003	84.8769		16.2691	77.9341
1.26923	107.853		9.26965	132.15		2.27	74.7251		10.2698	70.0309		3.2689	86.9943		11.2699	68.334		4.26909	90.433		12.2696	80.1499		5.27077	81.2504		13.269	80.6509		6.27002	63.2461		14.2685	72.0529		7.26961	83.4454		15.2702	90.7342		8.27114	83.2277		16.2701	89.7381
1.27096	116.913		9.27083	131.145		2.27125	69.3957		10.2716	67.0844		3.2698	87.2299		11.2708	72.4764		4.26999	87.7548		12.2712	78.283		5.27167	75.0263		13.2706	77.3585		6.27155	57.4395		14.2694	72.5301		7.27051	75.2351		15.2713	83.7913		8.27211	86.3054		16.2712	79.6042
1.27249	114.339		9.27264	125.01		2.27306	72.8253		10.2731	69.339		3.27133	92.2611		11.2722	72.5569		4.27131	78.1011		12.2723	72.7538		5.27292	63.8635		13.2723	82.0944		6.27336	74.4179		14.271	66.4611		7.27197	68.1312		15.273	81.8618		8.27371	81.4383		16.2727	73.4576
1.27339	114.76		9.27417	131.151		2.27458	68.4622		10.2741	70.8898		3.27313	103.457		11.2741	68.331		4.27305	83.2456		12.2733	77.5523		5.27473	70.2605		13.2736	62.1993		6.27461	82.3002		14.2728	68.1729		7.27377	63.1775		15.2746	73.3055		8.27544	81.1937		16.2745	74.1435
1.27444	114.551		9.27514	127.208		2.27556	69.1362		10.2752	76.7202		3.27431	81.65		11.2753	71.3998		4.27458	88.4855		12.2748	76.8216		5.27619	67.6331		13.2745	59.6315		6.27551	84.0955		14.274	75.2708		7.27509	68.7753		15.2756	76.3475		8.27656	74.3344		16.2757	80.4839
1.27603	118.47		9.27632	123.239		2.27667	64.2154		10.2769	81.4979		3.27521	84.0866		11.2761	79.7056		4.27548	99.7706		12.2766	75.8971		5.27702	75.1217		13.2759	69.4136		6.2769	74.3046		14.2749	79.0196		7.276	67.0545		15.2767	90.263		8.27739	76.7859		16.2766	79.7891
1.27763	119.057		9.27806	124.345		2.2784	73.5262		10.2786	68.8052		3.27674	93.5137		11.2774	84.7487		4.27673	104.25		12.2778	73.1683		5.27813	83.1472		13.2777	65.8944		6.27871	77.7193		14.2765	68.3847		7.27739	57.7586		15.2784	89.1893		8.27878	82.0795		16.278	76.8664
1.27874	123.074		9.27965	127.214		2.28	70.7526		10.2796	69.6909		3.27855	94.5545		11.2791	72.8134		4.27854	88.9687		12.2787	78.5902		5.2798	75.4885		13.279	66.4909		6.28003	61.9279		14.2783	65.2055		7.27919	71.1314		15.2801	76.768		8.28051	83.5617		16.2798	85.8462
1.27971	110.003		9.28055	120.537		2.28104	75.5243		10.2807	86.1891		3.2798	101.572		11.2805	74.057		4.27999	84.8858		12.2803	75.2798		5.28132	78.3247		13.2799	71.9247		6.28093	55.6561		14.2794	77.3376		7.28051	78.5365		15.281	90.937		8.28176	75.9836		16.2812	77.1736
1.28124	109.293		9.28153	120.062		2.28208	74.3135		10.2823	77.779		3.28063	96.9971		11.2814	74.3612		4.28083	91.3366		12.282	63.932		5.2823	69.1481		13.2813	66.6967		6.28232	71.1045		14.2802	72.4078		7.28127	76.586		15.2819	89.2013		8.28274	84.9962		16.2821	73.6097
1.28305	112.27		9.28312	138.854		2.28382	76.1357		10.2841	74.0272		3.28188	96.8957		11.2826	69.0646		4.28187	90.1497		12.2831	63.8814		5.28334	65.7692		13.2831	70.6124		6.28412	82.0735		14.2816	76.7799		7.28252	73.0371		15.2835	98.5598		8.28406	84.1224		16.2835	62.6884
1.2843	101.11		9.28472	133.59		2.28549	75.1545		10.285	88.1306		3.28362	87.0719		11.2844	77.3823		4.28361	84.0866		12.2839	70.359		5.28494	81.99		13.2845	67.0038		6.28544	72.6464		14.2833	70.8749		7.28426	72.3034		15.2852	83.4275		8.28579	83.6482		16.2853	65.0504
1.2852	107.563		9.28583	122.839		2.28639	75.5989		10.2859	87.4924		3.28501	74.1435		11.286	73.0669		4.28513	103.522		12.2853	69.7834		5.28667	86.7319		13.2853	61.3673		6.28621	66.13		14.2846	61.0183		7.28565	71.03		15.2863	72.6404		8.28725	87.5073		16.2866	65.3546
1.28659	117.542		9.28681	132.409		2.28729	74.1674		10.2874	80.0604		3.28598	81.8946		11.287	77.1944		4.28611	103.46		12.2871	65.2025		5.28785	81.7574		13.2865	71.0449		6.28746	63.3893		14.2856	60.7917		7.28662	66.9889		15.2872	81.0774		8.28822	97.5518		16.2873	54.0278
1.28839	108.199		9.28833	132.74		2.28889	76.4876		10.2891	67.66		3.28716	82.5507		11.288	65.1309		4.28722	84.0538		12.2883	72.9923		5.28883	74.2986		13.2882	64.4271		6.28912	72.9566		14.2869	66.637		7.28787	74.4865		15.2887	89.2221		8.2894	93.3527		16.2886	65.3129
1.28971	107.483		9.29007	121.222		2.29049	77.3465		10.2902	70.9972		3.2889	82.2167		11.2897	56.2466		4.28881	94.8677		12.2893	74.0302		5.29028	75.0442		13.2897	67.6003		6.29058	66.6221		14.2886	71.0061		7.28954	69.6492		15.2905	87.2091		8.29114	80.7434		16.2903	63.9142
1.29062	115.386		9.29132	126.755		2.29167	86.4516		10.2912	80.4988		3.29049	83.4066		11.2914	71.6831		4.29048	100.212		12.2906	60.7559		5.29209	77.9102		13.2906	69.6074		6.29162	67.0724		14.2901	75.6317		7.29114	71.1045		15.2918	72.9476		8.29267	67.5556		16.2917	61.233
1.29201	114.781		9.29222	128.61		2.29264	78.6498		10.2927	75.4408		3.29153	96.7585		11.2925	81.1788		4.29159	102.1		12.2924	57.2606		5.29334	72.1424		13.2918	70.0905		6.29273	63.1894		14.291	75.8345		7.29218	74.6565		15.2927	80.0873		8.29364	76.9976		16.2927	69.5686
1.29388	111.545		9.29368	133.435		2.2941	71.5459		10.2944	63.777		3.29258	91.4201		11.2935	83.7019		4.29256	87.1107		12.2939	67.6152		5.29424	83.5706		13.2935	65.8944		6.2944	62.2619		14.2922	63.2998		7.29322	67.7405		15.2941	86.5082		8.29482	78.4291		16.2939	73.4367
1.2952	110.477		9.29549	137.428		2.2959	79.5147		10.2958	71.3879		3.29424	84.5071		11.2951	83.168		4.29409	99.0847		12.2948	66.8667		5.2957	81.3488		13.2952	69.4762		6.29607	63.5056		14.294	67.2245		7.29489	80.639		15.2959	77.4688		8.29656	71.1791		16.2956	69.512
1.29596	122.544		9.29681	140.432		2.29715	93.8656		10.2967	70.0697		3.29591	89.5293		11.2969	75.7659		4.2959	106.397		12.2959	68.6352		5.29751	70.684		13.2962	68.322		6.29711	73.3264		14.2955	63.3684		7.29655	86.2398		15.2972	74.0362		8.29815	74.6744		16.2972	74.737
1.29721	100.582		9.29771	137.223		2.29813	86.4635		10.298	73.7707		3.29702	92.4669		11.2979	82.8937		4.29708	83.1591		12.2978	69.7327		5.29876	68.0715		13.2972	66.2463		6.29815	76.5532		14.2965	58.5669		7.29766	81.2385		15.2981	87.7578		8.29906	83.2426		16.2982	68.9722
1.29888	93.8537		9.2991	142.305		2.29945	70.0637		10.2998	80.8448		3.29806	99.6901		11.2987	76.6367		4.29805	82.2525		12.2993	73.9914		5.29959	74.7579		13.2988	74.9368		6.29975	73.8453		14.2976	72.0976		7.29864	81.0297		15.2994	81.8856		8.30003	80.7136		16.2993	68.8439
1.30027	105.064		9.3009	143.017		2.30125	73.7797		10.3012	77.2839		3.29973	85.6195		11.3002	77.943		4.29958	98.8521		12.3003	71.3222		5.30084	82.2853		13.3006	76.2133		6.30148	66.646		14.2994	84.5548		7.30023	66.2225		15.3013	84.0031		8.30163	79.5028		16.301	79.3238
1.30124	114.479		9.30229	128.303		2.30264	80.5913		10.3021	77.3883		3.3014	83.6094		11.3019	76.1983		4.30138	82.5805		12.3014	69.0795		5.30257	82.828		13.3017	73.222		6.30259	79.461		14.301	76.4727		7.30204	72.9178		15.3027	89.8395		8.30329	92.8993		16.3026	79.3149
1.30242	102.699		9.30305	124.458		2.30354	76.3087		10.3034	87.6206		3.30244	90.6		11.3031	66.0555		4.30256	79.8606		12.3031	67.3319		5.30389	87.6505		13.3027	60.7648		6.30357	76.8932		14.3019	63.8277		7.30308	81.2713		15.3035	83.8212		8.30433	83.8898		16.3037	74.8175
1.30416	104.14		9.30424	129.618		2.30486	84.3878		10.3052	85.8641		3.30327	79.807		11.304	66.4044		4.30333	70.866		12.3047	69.6104		5.30487	72.6762		13.3043	70.6333		6.30516	75.3901		14.3028	68.7574		7.30391	87.3135		15.3046	91.6468		8.30538	72.0082		16.3047	67.824
1.30576	96.3439		9.30597	131.321		2.30667	81.1937		10.3067	78.0384		3.3048	85.9058		11.3055	64.7522		4.30472	85.7955		12.3056	64.3734		5.30612	71.537		13.3061	65.2204		6.30697	64.9401		14.3044	74.573		7.30537	78.7989		15.3063	97.179		8.3069	81.5963		16.3064	61.1376
1.3068	105.276		9.30736	130.363		2.30806	69.7595		10.3075	73.6604		3.30653	92.0971		11.3072	73.9288		4.30645	84.2596		12.3066	73.3025		5.30785	65.5962		13.3072	71.1851		6.30801	76.4996		14.306	80.5406		7.30704	75.1337		15.3078	85.8312		8.30864	78.6707		16.308	57.4216
1.30784	112.547		9.30833	127.751		2.30889	77.2272		10.3086	83.6124		3.30771	100.227		11.3086	75.3364		4.30777	84.6771		12.3082	74.1853		5.30945	62.8375		13.3079	74.5282		6.30877	65.462		14.3071	65.9302		7.30822	80.7792		15.3088	83.9673		8.30989	74.8682		16.3091	67.645
1.30951	110.975		9.30951	114.906		2.31	77.1944		10.3103	78.2084		3.30862	96.3946		11.3096	68.1252		4.30868	71.2298		12.3098	75.8166		5.31042	73.5232		13.3094	74.9905		6.31023	69.7595		14.3081	78.2084		7.30919	81.5725		15.3099	86.383		8.31079	77.3018		16.3099	68.7336
1.31117	115.914		9.31118	113.877		2.31174	81.5904		10.3118	64.8566		3.31008	92.4371		11.3108	71.0807		4.30993	84.191		12.3109	58.7667		5.31146	78.8944		13.3111	78.2233		6.31197	77.099		14.3097	65.5813		7.31065	79.0882		15.3116	81.647		8.31218	74.6624		16.3114	70.2188
1.31228	116.236		9.31278	109.049		2.3132	82.7863		10.3128	58.1225		3.31188	76.4608		11.3126	67.4631		4.31166	94.0416		12.3119	64.952		5.3132	77.8893		13.3124	79.1061		6.31315	71.9247		14.3115	58.7428		7.31239	78.4619		15.3132	80.3468		8.31399	77.2004		16.3131	71.1045
1.31332	99.0042		9.31382	114.742		2.31424	82.7505		10.3139	64.114		3.3132	89.7948		11.3141	62.3007		4.31326	93.4302		12.3134	59.897		5.31487	76.9052		13.3134	79.6787		6.31412	70.8809		14.3126	67.0337		7.31377	63.9798		15.3143	75.0949		8.31531	72.5867		16.3143	62.1128
1.31492	98.4316		9.31486	117.423		2.31535	88.6078		10.3155	70.9107		3.3141	86.8273		11.3151	70.016		4.31423	93.9879		12.3153	66.7742		5.31591	78.1339		13.3147	84.1134		6.31551	63.8485		14.3135	68.993		7.31468	66.5505		15.3153	78.7751		8.31614	78.2383		16.3153	70.9763
1.31666	115.696		9.31653	120.554		2.31701	100.558		10.3173	73.8721		3.31542	79.7652		11.3162	78.1518		4.31534	82.491		12.3165	70.687		5.31695	75.8464		13.3165	73.1027		6.31725	64.0066		14.315	66.4074		7.316	74.3135		15.3169	84.2715		8.31753	75.5989		16.3167	66.8428
1.3177	109.591		9.31826	107.319		2.31868	74.3105		10.3184	79.5296		3.31723	80.141		11.318	76.1626		4.31701	94.2831		12.3174	69.8818		5.31862	68.7574		13.3179	76.0015		6.31864	64.1766		14.3168	58.9814		7.31773	74.0481		15.3186	91.8078		8.3194	71.9962		16.3184	70.5081
1.31853	100.042		9.31938	100.361		2.31979	69.8758		10.3193	89.0372		3.31862	86.1772		11.3196	75.5661		4.31868	99.192		12.3189	78.6826		5.32028	75.912		13.3188	79.8487		6.31961	61.1555		14.3181	69.4195		7.31919	61.5074		15.3198	84.5846		8.32072	68.4532		16.3198	77.0513
1.31999	101.843		9.32035	97.0657		2.32083	76.5025		10.3209	88.3632		3.31959	82.9235		11.3204	68.7396		4.31972	83.5975		12.3207	73.4934		5.32126	82.5567		13.32	64.6955		6.32086	67.9045		14.319	61.2688		7.32016	69.515		15.3207	83.2664		8.32149	71.7159		16.3207	68.5517
1.32173	103.215		9.32194	97.1223		2.32236	76.0164		10.3226	79.0286		3.32084	88.396		11.3214	74.3702		4.32076	96.0546		12.322	81.8827		5.32216	79.9143		13.3218	59.9715		6.32259	67.3289		14.3204	62.587		7.32134	80.2125		15.3223	81.4264		8.32274	73.0639		16.322	62.757
1.32291	112.613		9.32375	103.257		2.3241	70.18		10.3239	67.6212		3.32265	98.533		11.323	77.3465		4.32243	99.8392		12.3229	72.8134		5.32369	72.7388		13.3233	65.1488		6.32412	75.3961		14.3223	59.5838		7.32315	70.2397		15.3241	81.2265		8.3244	78.0802		16.3237	66.6758
1.32381	111.557		9.32479	101.784		2.32528	75.0412		10.3248	72.1633		3.3241	95.2226		11.3246	81.8439		4.32416	97.1402		12.3243	75.5452		5.32535	65.1369		13.3243	70.7616		6.32509	62.9479		14.3236	61.9935		7.32468	58.5042		15.3252	86.6693		8.32586	72.9148		16.3253	77.7014
1.32527	108.914		9.32556	101.814		2.32618	73.043		10.3263	71.7994		3.32494	98.9207		11.3257	78.7691		4.32506	80.7374		12.3261	80.7702		5.32646	70.8421		13.3254	72.9744		6.32627	67.1082		14.3244	66.7802		7.32551	57.869		15.3261	94.4919		8.32683	73.723		16.3262	69.3032
1.32701	110.256		9.32701	98.7865		2.32778	66.6549		10.3281	69.172		3.32605	95.5685		11.3267	76.8992		4.32597	96.1739		12.3274	72.3303		5.32744	80.4183		13.3272	71.868		6.32801	78.5454		14.3256	73.1385		7.32655	61.7102		15.3275	88.2976		8.32802	85.8312		16.3273	72.0201
1.32839	110.316		9.32875	107.45		2.32958	76.8813		10.3293	74.8175		3.32771	102.64		11.3283	70.0667		4.32749	103.666		12.3282	72.7955		5.32889	73.3025		13.3288	73.4814		6.32961	79.5087		14.3274	80.9969		7.32822	66.1181		15.3291	89.6605		8.32968	85.9774		16.3292	72.2826
1.32937	105.073		9.32993	114.265		2.3307	76.5711		10.33	66.4939		3.32924	92.4371		11.3301	74.913		4.32916	99.0429		12.3294	68.5338		5.3307	73.0192		13.3297	76.0761		6.33044	78.3426		14.3287	78.7751		7.32975	78.9242		15.3304	86.5052		8.33135	91.6676		16.3307	68.2087
1.33062	111.888		9.3309	114.309		2.33153	76.9409		10.3314	60.4219		3.33021	89.5383		11.3313	68.158		4.33034	92.2432		12.3311	70.3232		5.33202	74.4209		13.3306	78.9928		6.33141	75.3931		14.3297	64.8625		7.33079	79.124		15.3314	89.1983		8.33239	83.7198		16.3315	63.3415
1.33242	111.19		9.33229	119.678		2.33292	73.8035		10.3331	70.8809		3.33133	93.3706		11.3322	67.7882		4.33131	88.5899		12.3325	72.3333		5.33292	71.9157		13.3323	69.2794		6.33308	70.6393		14.3309	70.2814		7.33183	81.0655		15.3327	83.5408		8.33343	85.4942		16.3326	69.9176
1.33395	114.876		9.33403	116.597		2.33465	77.1467		10.3344	74.6147		3.33292	86.3621		11.3337	68.9901		4.33277	86.3979		12.3336	80.7374		5.33424	65.2144		13.3339	79.798		6.33461	76.4161		14.3326	69.9116		7.33343	84.8381		15.3344	90.6805		8.3351	76.7769		16.3342	66.9352
1.33485	104.143		9.33542	103.6		2.3359	85.4227		10.3353	76.264		3.33466	88.8732		11.3355	71.9784		4.33458	92.8367		12.3347	92.115		5.33598	69.4314		13.3349	73.9586		6.33572	68.2147		14.3342	67.6659		7.33516	76.3713		15.3359	86.3919		8.33676	78.45		16.3357	70.0786
1.33603	94.0505		9.33639	101.515		2.33688	80.4213		10.3366	86.89		3.33577	89.6874		11.3368	59.5331		4.33583	95.6133		12.3364	66.4581		5.33744	75.1158		13.336	77.3018		6.33676	73.5083		14.3353	66.5267		7.33634	87.1375		15.3368	86.5559		8.33788	83.4036		16.3368	71.1284
1.33784	100.301		9.33764	96.5795		2.3382	75.8256		10.3384	70.9047		3.33674	103.549		11.3376	68.2743		4.3368	96.0427		12.3381	62.8584		5.33841	77.7044		13.3375	81.996		6.33829	69.3569		14.3363	65.0743		7.33732	80.3736		15.338	89.8961		8.33885	83.5349		16.3378	76.6129
1.33937	114.646		9.33938	105.201		2.34	77.442		10.3399	67.8478		3.33827	90.26		11.3391	69.9295		4.33812	107.08		12.3391	63.9082		5.33966	70.0398		13.3393	74.5551		6.34002	67.3349		14.3379	78.4202		7.33877	73.4367		15.3397	93.0843		8.34044	86.0549		16.3394	78.9391
1.3402	123.483		9.3409	103.32		2.34146	74.5372		10.3409	74.9189		3.34001	80.8478		11.341	70.0577		4.33993	103.182		12.3401	66.0853		5.34153	74.567		13.3405	65.9034		6.34127	81.7663		14.3396	76.2789		7.34058	69.4851		15.3413	86.4814		8.34218	92.9858		16.3412	63.9559
1.34124	114.909		9.34188	98.527		2.34236	75.8106		10.342	67.1738		3.34119	102.028		11.3422	68.9513		4.34131	103.403		12.3418	73.3323		5.34299	70.1263		13.3414	67.7226		6.34218	84.1969		14.3407	71.8859		7.34183	69.1839		15.3423	84.2059		8.34322	85.4107		16.3423	61.7639
1.34291	107.045		9.34305	114.208		2.34354	76.5085		10.3437	74.2539		3.34216	104.262		11.343	73.2846		4.34222	100.671		12.3434	75.3752		5.34376	79.4998		13.3429	71.188		6.34364	69.2257		14.3417	64.1527		7.34266	70.3083		15.3434	80.0068		8.34406	81.322		16.3433	81.7276
1.34451	105.261		9.34486	101.032		2.34528	69.2316		10.3453	78.6856		3.34369	89.8723		11.3442	66.3418		4.34354	83.5438		12.3446	74.4895		5.3448	81.0804		13.3447	66.8309		6.34544	69.5329		14.3433	66.1002		7.34419	72.3333		15.3452	82.8042		8.34551	74.4805		16.3448	74.2002
1.34555	111.849		9.34639	98.9386		2.34688	80.7732		10.3464	71.9455		3.34549	76.6815		11.346	63.2103		4.34534	81.1162		12.3456	61.5999		5.34653	73.9497		13.3459	71.0717		6.34669	71.9843		14.3451	73.6992		7.346	72.0291		15.3468	86.1951		8.34725	82.3568		16.3466	69.4881
1.34659	108.264		9.34722	100.916		2.34785	79.9561		10.3474	77.433		3.34667	86.717		11.3473	70.2098		4.3468	87.2836		12.3472	77.3495		5.34799	74.6654		13.3468	65.2294		6.34759	65.5693		14.3461	78.8079		7.34725	74.2598		15.3477	83.6213		8.34843	87.8562		16.3478	70.2605
1.34812	93.7433		9.34826	94.3875		2.34896	71.9724		10.3491	77.8953		3.34744	87.4149		11.3483	71.0479		4.34756	92.0762		12.3489	70.7258		5.34903	73.5441		13.3483	68.8708		6.34898	67.7912		14.3469	73.0102		7.34801	79.2403		15.3486	86.4188		8.3494	84.4862		16.3487	79.0017
1.34985	110.954		9.34986	98.7775		2.3507	80.3527		10.3508	75.9747		3.34883	92.121		11.3495	76.3326		4.34868	97.4474		12.35	67.4303		5.35014	70.6781		13.3501	64.6061		6.35086	76.5234		14.3485	70.4097		7.34933	70.2963		15.3502	79.9292		8.35079	78.4321		16.3502	81.7216
1.3511	109.427		9.35146	91.9659		2.35229	75.8375		10.3518	74.3344		3.35049	91.3247		11.3512	80.1887		4.35041	102.204		12.3508	77.9341		5.35174	77.8804		13.3513	74.8235		6.35211	74.0183		14.3501	81.9184		7.35107	72.0589		15.3518	74.7072		8.35253	76.6129		16.352	78.6588
1.35201	105.753		9.35257	95.485		2.3532	65.3308		10.3527	64.6717		3.35181	101.002		11.3528	76.3147		4.35187	91.6378		12.3523	88.0382		5.35341	81.987		13.3522	72.372		6.35294	67.3856		14.3513	67.2424		7.35239	69.5299		15.3529	78.4172		8.35392	83.845		16.3532	68.8439
1.35346	110.555		9.35361	88.2767		2.35417	65.5574		10.3542	69.3957		3.35278	93.3169		11.3538	68.8678		4.35291	93.4362		12.3539	89.1923		5.35452	76.601		13.3534	65.7811		6.35419	68.9513		14.3523	68.1013		7.35329	74.1107		15.3539	89.2221		8.35489	81.5606		16.354	68.8231
1.35527	103.412		9.35514	104.023		2.35576	71.8949		10.3559	79.2075		3.35403	87.5192		11.3549	70.1025		4.35402	94.4472		12.3552	86.5082		5.35549	80.4153		13.3551	66.2672		6.35586	71.0807		14.3537	69.9653		7.35454	70.8302		15.3554	84.0329		8.35607	85.9535		16.3553	85.4525
1.35659	109.108		9.35687	111.247		2.35743	72.545		10.357	71.4714		3.35577	82.0705		11.3566	82.7445		4.35562	99.8124		12.3562	77.7432		5.35702	62.2023		13.3565	62.5542		6.35725	76.8634		14.3555	82.5924		7.35627	72.712		15.3572	76.2669		8.35781	85.6284		16.357	77.1139
1.35749	110.987		9.35806	108.449		2.35854	61.9399		10.358	74.5998		3.3573	74.731		11.3583	75.9389		4.35736	97.9484		12.3575	63.3654		5.35882	76.5383		13.3575	61.2927		6.35822	73.6425		14.3569	71.2298		7.35787	75.8912		15.3585	82.7952		8.35933	89.6635		16.3584	74.5849
1.35888	112.04		9.35896	97.0776		2.35951	70.0697		10.3594	69.2108		3.35827	69.1273		11.3594	70.1263		4.35847	101.563		12.3593	67.5198		5.36001	83.2635		13.3587	68.1789		6.3594	64.946		14.3578	69.5537		7.35884	78.0235		15.3594	84.6592		8.36031	89.2281		16.3594	70.189
1.36076	108.199		9.36042	94.0535		2.36097	74.9905		10.3611	74.6356		3.35945	86.4933		11.3603	57.9078		4.35937	85.7209		12.3607	69.7237		5.36091	81.5665		13.3604	69.1451		6.36114	71.0002		14.359	74.0541		7.35995	75.2708		15.3608	78.0593		8.36149	89.8812		16.3605	56.8848
1.36201	99.0877		9.36222	95.7594		2.36278	79.2105		10.3625	73.9169		3.36119	80.6152		11.362	66.637		4.36097	90.3345		12.3616	75.8673		5.36244	82.9294		13.362	77.5404		6.36273	67.8001		14.3608	73.8841		7.36162	72.4018		15.3626	89.3951		8.36329	88.0501		16.3623	63.9827
1.36277	108.643		9.36354	85.0976		2.36403	84.9216		10.3634	71.355		3.36278	89.3414		11.3637	78.7095		4.3627	87.5401		12.3629	72.5808		5.36431	76.4071		13.363	75.5482		6.36377	71.8591		14.3623	62.7004		7.36329	64.7641		15.3639	86.7975		8.36482	84.3371		16.3639	67.5943
1.36402	106.907		9.36438	90.266		2.36493	80.6122		10.3648	69.843		3.36383	94.5545		11.3647	66.7086		4.36388	81.6411		12.3646	67.7584		5.36542	73.8244		13.3641	78.2472		6.36482	74.8235		14.3632	73.1981		7.36426	66.9949		15.3648	84.9127		8.36565	77.77		16.3648	66.1569
1.36576	97.7307		9.36576	97.4235		2.36632	78.0026		10.3666	78.0116		3.36487	78.5782		11.3656	75.6377		4.36479	88.6555		12.3662	77.8714		5.36626	75.5542		13.3658	80.979		6.36641	77.5195		14.3644	77.4658		7.3653	72.9864		15.3662	89.0611		8.3667	70.3768		16.366	64.0305
1.36707	105.204		9.36764	87.7817		2.3682	82.9921		10.368	69.4762		3.3666	77.3197		11.3671	73.6693		4.36631	81.1669		12.3671	74.7728		5.36764	71.2566		13.3674	66.2225		6.36815	81.5278		14.3662	69.7386		7.36697	77.0692		15.368	94.9572		8.36829	80.7911		16.3676	71.2775
1.36805	104.73		9.36889	98.3928		2.36951	79.0107		10.3689	75.3484		3.36827	82.1809		11.3687	71.7606		4.36819	83.6154		12.3682	73.1057		5.36931	70.7109		13.3685	70.5588		6.36919	73.4993		14.3678	65.4381		7.36871	80.6927		15.3694	88.5213		8.36989	83.2724		16.3693	74.1554
1.3693	96.6332		9.36972	106.311		2.37042	78.6588		10.3702	84.2983		3.36924	77.9698		11.3699	70.9196		4.3693	81.4741		12.37	69.5448		5.37063	70.857		13.3695	66.3984		6.37016	69.7327		14.3686	58.6891		7.36968	78.6945		15.3702	84.4176		8.37093	81.8946		16.3703	83.8838
1.37096	104.265		9.37097	107.793		2.37174	69.3897		10.3721	76.7143		3.37015	92.0792		11.3709	77.612		4.37013	80.7434		12.3716	71.7696		5.3716	73.8841		13.3712	65.4501		6.37183	70.0995		14.3696	62.5393		7.37051	60.8931		15.3713	85.6642		8.37197	75.5243		16.3714	78.1339
1.37256	102.258		9.37264	105.011		2.37361	76.8306		10.3734	77.0244		3.37167	80.6748		11.3724	67.2872		4.37152	98.3093		12.3725	82.1421		5.37285	75.9657		13.3729	69.9086		6.37357	70.3798		14.3713	59.8105		7.37204	64.0245		15.3731	92.4162		8.37357	83.3171		16.373	78.0116
1.3736	97.2327		9.37403	114.819		2.37493	82.4224		10.3742	65.0057		3.37334	72.7388		11.3741	70.347		4.37319	100.752		12.3735	79.8785		5.37459	71.9187		13.374	66.4014		6.37461	71.5936		14.3728	71.2596		7.3737	66.9651		15.3745	81.2355		8.37524	83.4066		16.3747	66.8786
1.37471	108.95		9.375	95.9175		2.37577	90.3942		10.3753	67.8299		3.37452	80.4482		11.3755	71.9813		4.37451	92.956		12.3751	70.183		5.37612	82.5507		13.3748	56.0528		6.37544	60.4726		14.3739	76.2848		7.37482	64.4092		15.3754	76.4369		8.37642	92.619		16.3757	64.5882
1.37638	111.7		9.37625	106.493		2.37695	74.7281		10.3771	80.2782		3.37549	92.6101		11.3764	67.8538		4.37548	74.1793		12.3767	77.445		5.37709	80.2961		13.3763	65.3129		6.3769	70.866		14.3749	69.6581		7.37586	83.3052		15.3766	88.5601		8.37739	84.9992		16.3766	73.9169
1.37805	99.7647		9.37792	107.429		2.37861	71.6473		10.3785	69.3837		3.37695	103.263		11.3776	70.8928		4.3768	81.8409		12.3778	70.2904		5.37827	71.021		13.378	77.6239		6.37857	73.5649		14.3765	60.055		7.37725	83.4364		15.3784	89.2221		8.37885	80.7315		16.3781	74.4209
1.37909	105.103		9.37951	90.764		2.38007	65.4441		10.3796	60.1654		3.37876	96.1083		11.3794	61.4329		4.37854	86.374		12.3788	66.4521		5.38001	76.5204		13.3792	70.2695		6.37975	72.539		14.3783	61.2837		7.37898	77.4957		15.38	91.6468		8.38065	83.9106		16.3798	74.4328
1.38006	99.9734		9.38049	94.3338		2.38111	67.5824		10.3807	60.9259		3.38008	96.3588		11.3809	74.9159		4.37999	93.6539		12.3804	74.6774		5.3816	67.6301		13.3802	68.7843		6.38072	75.5989		14.3794	70.0697		7.38037	84.4862		15.381	95.9562		8.3819	82.491		16.3809	79.6698
1.3818	104.498		9.3816	95.4463		2.38222	72.2826		10.3823	63.8187		3.38098	89.9319		11.3818	68.0626		4.38097	89.4071		12.3821	63.5205		5.38258	76.9588		13.3816	72.2676		6.38211	75.6019		14.3803	65.3785		7.38127	80.0604		15.382	86.6454		8.38281	79.3566		16.3819	76.5324
1.38353	105.064		9.38326	103.126		2.38389	73.6753		10.3839	67.8449		3.38237	75.7271		11.383	66.1598		4.38215	99.1175		12.3833	70.5349		5.38369	77.7611		13.3834	73.3204		6.38391	77.4778		14.3819	69.2316		7.38259	68.7217		15.3836	89.4756		8.38426	81.6649		16.3833	84.7636
1.38451	113.185		9.38493	102.165		2.38556	72.6673		10.385	70.8361		3.38417	85.9386		11.3849	73.1743		4.38388	94.301		12.3843	64.8774		5.38542	81.647		13.3848	72.1275		6.3853	67.7435		14.3837	64.3496		7.3844	76.9529		15.3854	99.1354		8.38614	75.7868		16.3851	82.7803
1.38534	109.087		9.38597	91.265		2.3866	75.6615		10.3861	67.2722		3.38556	84.8381		11.3864	66.0704		4.38548	96.2962		12.3857	73.8185		5.38709	81.5278		13.3857	80.9969		6.3862	68.9304		14.3849	61.7013		7.38579	76.2252		15.3866	86.7379		8.38739	81.0267		16.3864	71.0419
1.38687	116.087		9.38701	88.1157		2.38764	79.1419		10.3876	68.4861		3.38646	94.1907		11.3872	69.2972		4.38645	99.9197		12.3875	80.4303		5.38799	68.1431		13.387	83.0756		6.38752	80.4839		14.3858	68.9394		7.38676	73.3413		15.3875	85.6046		8.38815	83.4573		16.3873	84.695
1.38853	106.373		9.38861	90.3077		2.38924	65.8735		10.3893	75.3842		3.38771	93.9819		11.3883	71.7606		4.38756	85.3541		12.3888	70.7645		5.38889	66.4133		13.3888	77.6358		6.38926	80.7673		14.3873	73.0967		7.38801	76.6994		15.3891	77.4957		8.3894	88.0948		16.3887	79.0733
1.38971	101.915		9.39042	88.6167		2.39097	67.1977		10.3905	77.3465		3.38952	97.0746		11.3899	60.228		4.3893	80.6778		12.3897	60.3771		5.39042	74.4984		13.3902	64.3108		6.39079	67.6391		14.3891	68.5189		7.38982	66.8637		15.3909	77.433		8.39114	80.7166		16.3904	78.5514
1.39069	107.274		9.39146	93.6569		2.39208	85.4942		10.3915	68.832		3.39098	96.2455		11.3914	68.501		4.39097	86.1563		12.3911	67.481		5.39209	69.0169		13.3911	66.7056		6.39169	67.4482		14.3903	65.5872		7.39127	66.309		15.392	86.5559		8.39253	89.6546		16.3919	83.9673
1.39207	110.614		9.39229	94.2861		2.39313	78.8586		10.393	78.787		3.39181	88.6108		11.3925	71.3282		4.39187	95.4373		12.393	77.433		5.3932	81.0685		13.3924	68.8469		6.39287	78.1667		14.3912	69.7714		7.39211	68.2982		15.3927	76.9827		8.3935	83.6333		16.3928	70.4425
1.39388	95.9562		9.39375	96.3797		2.39472	75.3394		10.3948	78.7602		3.39292	93.9223		11.3935	61.3881		4.39277	88.3632		12.3942	81.483		5.39417	77.9311		13.3942	81.5486		6.39468	63.4966		14.3924	66.1241		7.39322	74.2509		15.3942	74.3553		8.39475	83.9464		16.3941	72.9238
1.39527	105.306		9.39549	101.846		2.39646	76.2401		10.3959	74.9845		3.39459	79.4282		11.3952	74.4507		4.39437	94.0535		12.395	74.9398		5.3957	71.874		13.3957	72.378		6.39621	72.1364		14.3942	64.8357		7.39489	67.4542		15.3959	75.2201		8.39642	92.5981		16.3959	86.711
1.39617	114.077		9.39667	80.7852		2.3975	76.1983		10.3968	71.6473		3.39612	93.466		11.3969	83.1322		4.39604	85.1513		12.3963	65.1369		5.39751	68.1133		13.3965	64.9997		6.39704	66.2911		14.3956	67.3349		7.39641	79.0673		15.3971	83.2038		8.39802	79.9412		16.3973	81.2892
1.39742	106.096		9.39757	93.3199		2.39833	77.3525		10.3982	64.9073		3.39709	93.296		11.398	75.4856		4.39715	79.4789		12.398	62.3156		5.39876	69.7088		13.3976	71.0866		6.39808	70.9793		14.3965	70.517		7.39739	81.483		15.3981	87.4626		8.39899	79.9471		16.3982	84.2447
1.39923	96.8271		9.39903	91.1607		2.39979	77.773		10.3998	71.9485		3.3982	87.2926		11.399	61.2897		4.39812	98.7536		12.3993	78.5663		5.39966	75.8584		13.3993	84.4146		6.39982	74.3463		14.3978	76.765		7.3985	76.5264		15.3995	74.8295		8.4001	86.5023		16.3992	79.0614
1.40069	103.949		9.40076	90.6894		2.40146	78.2889		10.4011	77.5941		3.39987	87.9934		11.4005	63.9231		4.39965	101.533		12.4003	78.45		5.40105	82.169		13.4008	81.319		6.40127	75.4379		14.3995	79.625		7.40009	90.937		15.4012	74.2777		8.40176	92.3476		16.401	81.3727
1.40159	106.036		9.40215	89.7798		2.40271	65.6409		10.4021	74.3284		3.40153	81.6679		11.4023	70.7109		4.40145	101.479		12.4016	77.4957		5.40285	81.0565		13.4018	62.7958		6.40232	75.3961		14.4011	81.1251		7.40183	80.1082		15.4026	89.8544		8.40343	97.4474		16.4025	84.9097
1.40284	104.665		9.40306	96.3141		2.40368	69.5925		10.4034	68.6173		3.40265	80.8329		11.4035	65.3188		4.4027	82.5745		12.4032	74.9816		5.40424	72.1573		13.4029	75.071		6.40336	78.2442		14.4021	67.5645		7.40294	72.4168		15.4036	92.0225		8.40447	88.5213		16.4035	65.4978
1.40471	125.457		9.40431	96.4543		2.405	79.1031		10.4052	66.4879		3.40369	88.6376		11.4044	59.7657		4.40361	78.2323		12.4048	81.4383		5.40514	76.255		13.4045	72.6166		6.40496	69.0587		14.4031	71.7845		7.40391	74.4388		15.4047	95.0287		8.40551	79.1658		16.4046	72.1662
1.40617	114.008		9.40611	87.1852		2.40681	73.0967		10.4066	65.1966		3.40521	98.4465		11.406	66.0406		4.40499	82.1421		12.4059	74.6803		5.40646	75.0173		13.4062	72.6255		6.40669	69.8132		14.4049	70.3112		7.40544	80.8716		15.4066	92.3357		8.40718	87.8861		16.4062	80.0754
1.40694	103.886		9.40757	96.1173		2.4082	70.7914		10.4075	63.5652		3.40695	93.5227		11.4078	66.2523		4.4068	87.8443		12.407	62.1934		5.40827	75.4677		13.4074	80.6867		6.40787	77.1109		14.4065	69.6372		7.40725	79.9054		15.4081	86.8721		8.40892	89.8037		16.4079	67.4005
1.40805	109.946		9.40847	96.9255		2.40917	78.0295		10.4087	65.7006		3.40813	89.2728		11.4089	65.4381		4.40819	85.4972		12.4087	69.178		5.40966	74.0212		13.4083	79.3328		6.40884	69.9802		14.4076	74.9696		7.40843	67.2186		15.4091	82.6014		8.40989	90.94		16.409	73.7051
1.40971	113.528		9.40972	96.8151		2.41042	81.5456		10.4105	74.1853		3.40903	76.0701		11.4097	66.5923		4.40909	89.759		12.4103	68.7097		5.41042	82.3867		13.4098	69.8013		6.4103	72.4615		14.4086	78.9123		7.40933	77.7551		15.4102	80.1648		8.41072	83.6691		16.41	67.144
1.41124	108.369		9.41153	102.288		2.41215	67.5228		10.4121	76.0313		3.41056	84.012		11.4111	71.4296		4.41041	98.4852		12.4114	65.5037		5.4116	91.5692		13.4116	66.5654		6.41211	69.3808		14.4103	75.6168		7.41086	79.625		15.412	84.2804		8.41225	98.1482		16.4114	66.1718
1.41228	98.1989		9.41306	93.123		2.41368	71.1194		10.4131	66.8279		3.41237	83.8927		11.4128	66.0406		4.41229	84.2655		12.4124	70.8212		5.41334	83.6094		13.4128	83.1531		6.41336	64.6001		14.412	68.152		7.41266	74.2628		15.4136	85.7537		8.41392	106.072		16.4132	75.6884
1.41332	103.099		9.41389	94.1191		2.41465	68.0387		10.4141	67.815		3.41348	89.4906		11.4141	69.005		4.41368	80.7464		12.414	60.732		5.4148	73.5411		13.4137	80.5138		6.41426	65.5992		14.413	67.6212		7.41384	75.077		15.4144	72.7955		8.4151	100.206		16.4144	71.9545
1.41499	104.921		9.41493	83.5736		2.41583	77.6776		10.4159	71.9813		3.41431	86.0847		11.415	66.4312		4.41444	95.7027		12.4157	61.9786		5.41577	76.8485		13.4152	81.9542		6.41572	84.1254		14.4138	70.2605		7.41461	71.7428		15.4154	89.7888		8.41607	99.2934		16.4154	65.2383
1.41666	104.814		9.4166	81.2385		2.41757	70.186		10.4175	71.1582		3.4157	86.0072		11.4163	69.6402		4.41562	101.053		12.4168	63.1388		5.41688	83.3291		13.417	69.3479		6.41752	69.2346		14.4154	67.2215		7.416	82.4314		15.417	81.0893		8.41753	88.4945		16.4169	71.5012
1.41777	93.8269		9.41819	96.6601		2.41917	70.6602		10.4185	80.6867		3.41744	80.5585		11.418	65.0117		4.41736	92.5057		12.4176	68.2057		5.41855	82.4016		13.4183	64.9759		6.41877	71.03		14.4171	64.9073		7.41766	85.2855		15.4186	72.9894		8.41926	85.8581		16.4187	65.2085
1.41874	101.888		9.41917	100.621		2.42	66.47		10.4194	76.6815		3.41869	78.7184		11.4196	62.0442		4.41881	98.4286		12.4191	76.8395		5.42021	88.7092		13.419	67.4661		6.41961	74.8712		14.4183	73.8244		7.41898	71.7756		15.4197	85.2736		8.42065	81.656		16.4199	63.0821
1.42027	103.102		9.42028	91.3992		2.42104	60.5233		10.421	69.8311		3.41966	78.1518		11.4205	69.9862		4.41979	94.3756		12.4208	72.4078		5.42132	72.4555		13.4204	70.7765		6.42086	61.9041		14.4192	72.9297		7.41996	72.7687		15.4207	87.4924		8.42156	84.3073		16.4207	73.5411
1.42207	103.901		9.42188	94.0744		2.42264	62.9777		10.4226	78.0683		3.42098	86.7289		11.4217	75.2917		4.42097	92.7413		12.422	62.924		5.4223	75.8971		13.422	65.8378		6.42259	64.4361		14.4206	69.5955		7.4212	70.4335		15.4223	90.2093		8.42281	84.1104		16.4221	68.1998
1.42326	108.9		9.42354	104.56		2.42424	76.5741		10.4237	67.2663		3.42278	94.9721		11.4234	87.1136		4.42263	93.0067		12.4229	71.5698		5.42389	69.6462		13.4234	70.8838		6.42391	69.8788		14.4224	69.7774		7.42294	71.8352		15.4241	85.6762		8.42461	85.9476		16.4237	65.1131
1.42416	106.651		9.42465	92.3685		2.42528	86.9645		10.4247	67.0844		3.42424	95.7773		11.425	68.9841		4.4243	101.426		12.4243	81.8827		5.42563	66.9502		13.4244	73.8453		6.42489	62.6437		14.4237	66.7474		7.42447	76.1655		15.4252	94.6201		8.42607	86.3502		16.4251	72.7627
1.42569	112.78		9.42562	100.981		2.42632	86.2398		10.4262	66.7056		3.42521	93.8895		11.426	71.9634		4.42534	99.5708		12.4262	82.5477		5.42681	75.0173		13.4256	71.9336		6.42614	75.7957		14.4246	69.8042		7.42544	78.7303		15.4261	75.5184		8.42697	89.7977		16.426	81.8856
1.42749	107.241		9.42715	94.5366		2.42785	84.4355		10.428	73.9258		3.4264	93.7523		11.4271	65.4501		4.42631	100.928		12.4275	80.9909		5.42771	86.1861		13.4274	66.9621		6.42787	78.5514		14.426	64.618		7.42655	78.4381		15.4276	72.4287		8.42822	95.655		16.4273	78.0325
1.42874	101.038		9.42889	90.8714		2.42965	78.1756		10.4293	77.7253		3.42813	89.6367		11.4288	66.6519		4.42791	87.3343		12.4284	72.7836		5.42931	82.3837		13.429	71.1701		6.42947	64.9162		14.4278	73.3741		7.42829	77.767		15.4294	87.2449		8.43003	102.344		16.429	78.2711
1.42951	110.632		9.43014	88.4557		2.43083	72.0261		10.4302	90.9161		3.42973	82.5805		11.4305	65.4023		4.42965	95.7355		12.4297	69.843		5.43105	73.7558		13.4299	84.7099		6.43044	55.4533		14.4292	74.6088		7.42989	77.8446		15.4307	82.9473		8.43149	95.1212		16.4305	76.1655
1.43089	115.69		9.43104	88.3632		2.43181	77.3137		10.4316	75.9419		3.4307	87.0928		11.4314	77.4509		4.43083	97.349		12.4315	65.8944		5.43223	68.8887		13.431	75.1307		6.43148	63.2073		14.4301	75.3275		7.43093	84.5697		15.4316	78.9451		8.43232	100.012		16.4315	81.2534
1.43256	113.209		9.4325	95.2942		2.43326	74.1107		10.4334	62.5811		3.43181	105.249		11.4324	79.4878		4.43173	92.2045		12.433	69.1899		5.43306	73.1146		13.4327	71.2477		6.43322	67.0307		14.4314	84.3431		7.43197	78.8824		15.433	71.8412		8.43343	87.9487		16.4326	71.6652
1.43388	114.927		9.43437	83.8748		2.435	84.695		10.4347	60.395		3.43355	86.541		11.4339	73.5351		4.43333	91.8734		12.4339	78.8854		5.43445	79.4133		13.4344	81.0536		6.43489	68.319		14.4332	95.5447		7.4337	78.7781		15.4349	71.5996		8.4351	72.6196		16.4344	72.5032
1.43478	112.466		9.43556	95.992		2.43632	78.107		10.4356	69.008		3.43521	85.9356		11.4355	72.2497		4.43513	98.1035		12.4351	75.8315		5.43612	78.7781		13.4354	87.1286		6.43586	60.2638		14.4346	78.3039		7.43537	68.6083		15.4361	82.169		8.43663	77.1109		16.436	74.9965
1.4361	118.485		9.43632	89.7083		2.43722	68.3847		10.437	71.1731		3.43612	83.8003		11.4367	67.0038		4.43624	87.0689		12.437	86.9556		5.43744	78.6051		13.4365	75.918		6.4369	64.0722		14.4355	71.9933		7.43627	76.4041		15.4369	96.7227		8.4376	96.5795		16.437	71.6324
1.43784	109.329		9.43771	81.0953		2.43861	56.6373		10.4388	64.5911		3.43709	88.4676		11.4376	72.7508		4.43701	95.9294		12.4384	80.0575		5.43841	72.888		13.4382	81.155		6.43864	69.4583		14.4366	62.9986		7.43718	70.9942		15.4382	93.5406		8.43871	88.2439		16.438	75.6824
1.43937	98.2645		9.43937	91.7452		2.44049	65.6081		10.4402	78.0235		3.43869	83.168		11.4392	76.0313		4.43847	107.844		12.4393	78.5991		5.43973	63.3624		13.4399	81.6083		6.44037	61.1823		14.4383	75.2529		7.43877	74.57		15.4399	81.987		8.44031	84.3908		16.4398	66.0972
1.44034	108.861		9.44069	85.4942		2.44174	71.0061		10.4409	76.9111		3.44028	89.9111		11.4409	77.5076		4.4402	106.952		12.4403	71.9694		5.44146	89.2758		13.4409	79.795		6.44127	65.963		14.4398	70.9972		7.44037	75.5243		15.4413	79.7026		8.44204	85.4048		16.4414	64.114
1.44145	100.734		9.44167	87.4954		2.4425	72.5867		10.4421	67.9135		3.4414	94.0207		11.4422	73.5143		4.44138	89.1088		12.442	60.8066		5.44292	87.9308		13.4418	78.6498		6.44218	79.5833		14.4408	74.567		7.44155	68.996		15.4423	86.4247		8.44315	100.653		16.4424	61.0392
1.44319	107.086		9.44292	103.248		2.44382	79.6101		10.4439	67.7882		3.44237	87.2031		11.4431	67.9492		4.44236	85.9267		12.4435	65.3785		5.44389	79.7145		13.4433	73.9318		6.44371	81.4353		14.4419	74.5282		7.44252	77.9311		15.4435	94.8647		8.44413	91.2024		16.4433	76.6606
1.44478	105.807		9.44465	79.2343		2.44549	72.8552		10.4453	64.0454		3.4439	85.697		11.4444	72.2915		4.44374	96.3946		12.4446	79.1479		5.44507	80.3289		13.4449	76.9499		6.44537	74.3463		14.4435	70.9524		7.44398	76.6785		15.4452	88.7151		8.44565	77.3704		16.4448	84.3341
1.44582	106.848		9.44625	82.8191		2.44688	76.3445		10.4463	76.0015		3.4457	87.9517		11.4462	69.7923		4.44548	101.506		12.4456	73.9109		5.44681	80.2841		13.4461	72.5569		6.44648	65.5843		14.4452	82.3419		7.44579	74.3463		15.4468	74.6237		8.44746	96.171		16.4465	74.5461
1.44687	110.248		9.44722	91.9033		2.44785	72.9476		10.4474	68.5099		3.44695	86.0847		11.4477	64.3794		4.44694	97.6621		12.4473	69.4941		5.44834	71.7517		13.4471	69.9027		6.44753	73.7827		14.4463	79.9859		7.44704	67.1887		15.4478	77.0781		8.44864	91.444		16.4476	73.052
1.4486	105.911		9.44833	78.4709		2.44903	67.9373		10.4491	76.0313		3.44785	80.4959		11.4486	64.1289		4.44791	90.9072		12.449	69.7565		5.44931	69.6342		13.4486	67.6898		6.44898	70.5618		14.4473	69.8371		7.44801	79.0375		15.4488	65.7423		8.44954	89.6516		16.4486	75.241
1.45027	103.06		9.45	57.6781		2.45076	62.1188		10.4507	75.3961		3.44924	83.4543		11.4499	77.8505		4.44909	94.4621		12.4501	72.1961		5.45042	68.8081		13.4504	76.5264		6.45072	72.1096		14.4488	82.3419		7.44933	87.8712		15.4505	69.7088		8.45107	92.8934		16.4501	67.1709
1.45124	105.774		9.45167	71.2238		2.45236	74.2509		10.4518	71.2447		3.45112	78.3605		11.4517	75.8315		4.45083	87.5998		12.4511	73.7677		5.45223	70.5737		13.4517	63.5563		6.45204	70.9614		14.4506	67.317		7.45114	79.9322		15.4522	76.7262		8.45288	94.477		16.4519	63.4131
1.45214	107.235		9.45271	84.9604		2.4534	73.0102		10.4528	76.2669		3.45244	74.9696		11.4531	77.77		4.45236	90.9758		12.4526	75.1307		5.45382	78.6051		13.4525	67.4422		6.45294	79.0137		14.4518	73.0102		7.45252	69.8848		15.4533	77.4121		8.45406	102.66		16.4531	69.2794
1.45367	110.948		9.45375	101.232		2.45445	76.6874		10.4544	72.2318		3.45327	89.7112		11.4539	74.9905		4.45333	103.463		12.4544	67.7822		5.45473	75.578		13.4539	69.4583		6.45426	83.5349		14.4527	66.816		7.45343	72.4734		15.4543	95.2077		8.45482	93.4332		16.4541	74.2121
1.45534	105.864		9.45542	86.723		2.45611	72.2468		10.4561	74.2211		3.45466	93.12		11.4551	75.5721		4.45444	99.9346		12.4556	76.4041		5.4557	68.5875		13.4557	73.2548		6.45607	77.9758		14.4542	66.3597		7.45468	72.9297		15.4559	84.3162		8.45621	98.7447		16.4554	73.7737
1.45645	114.551		9.45708	88.6197		2.45785	67.5108		10.4573	77.7849		3.45646	96.3857		11.4567	76.6904		4.45624	88.5392		12.4565	73.055		5.4573	72.548		13.4571	75.0979		6.45746	67.4512		14.456	71.5877		7.45655	76.4161		15.4577	82.1242		8.45788	99.2487		16.4572	70.3172
1.45742	113.206		9.45806	81.7634		2.45896	60.4904		10.4582	85.5748		3.45785	81.1132		11.4582	67.3379		4.45784	82.4374		12.458	71.0121		5.45889	76.5473		13.458	76.2908		6.45843	67.8031		14.4572	69.6014		7.45794	75.4945		15.4587	83.4752		8.4592	101.148		16.4586	67.5436
1.45888	105.028		9.45896	74.3046		2.45993	69.5179		10.4598	82.169		3.45862	80.9671		11.4592	67.478		4.45868	88.7897		12.4598	71.8143		5.46	69.2108		13.4593	69.0437		6.45968	70.684		14.458	67.7792		7.45877	59.4615		15.4595	80.8955		8.46017	102.646		16.4596	76.3653
1.46062	97.3848		9.46056	68.1282		2.46153	83.4424		10.4616	75.0501		3.4598	97.1551		11.4603	60.9915		4.45965	91.8108		12.4611	69.1273		5.46098	69.6581		13.4611	64.4331		6.46148	79.9859		14.4594	71.6563		7.45989	73.4725		15.461	78.6737		8.46142	110.376		16.4608	79.8278
1.46194	110.086		9.46215	80.1171		2.46326	79.7115		10.4627	63.5384		3.46153	94.6649		11.4619	63.0374		4.46131	86.1146		12.4618	80.0604		5.4625	62.9121		13.4625	72.4973		6.46294	66.5267		14.461	80.818		7.46162	86.9854		15.4627	93.1737		8.46315	90.5195		16.4627	68.4085
1.46284	110.865		9.46333	84.5876		2.46431	75.4796		10.4635	65.7662		3.46299	92.1746		11.4636	80.0336		4.46291	81.4979		12.4632	78.3367		5.46431	65.5902		13.4633	69.7535		6.46377	62.9121		14.4624	90.0274		7.46308	84.2059		15.4639	82.1898		8.46468	99.538		16.4641	67.9045
1.46423	110.88		9.46431	94.5396		2.46514	72.4913		10.4649	73.7886		3.46396	89.7291		11.4647	67.6242		4.46395	95.9861		12.4648	80.8716		5.46549	65.2353		13.4645	72.2826		6.46489	60.7917		14.4633	65.8944		7.46398	73.4128		15.4649	83.7496		8.46565	102.27		16.4648	78.4172
1.46603	108.539		9.46576	86.8959		2.46667	69.2197		10.4666	72.2378		3.46508	86.5082		11.4658	75.3484		4.46499	105.968		12.4662	74.8056		5.46639	73.2816		13.4661	81.4114		6.46655	69.4971		14.4646	64.2064		7.46516	69.1183		15.4663	87.0063		8.46676	99.9525		16.466	74.3105
1.46742	100.701		9.4675	79.6638		2.46833	74.8802		10.4678	75.584		3.46681	79.3954		11.4673	80.7345		4.46652	108.005		12.4671	74.9338		5.46785	82.0019		13.4677	89.41		6.46801	77.8953		14.4663	82.1391		7.46683	70.4782		15.468	83.517		8.4685	91.7482		16.4677	73.2011
1.46832	105.571		9.46882	80.8985		2.46952	83.687		10.4688	67.2633		3.46848	73.6693		11.4691	78.1816		4.46833	102.825		12.4684	71.9843		5.46966	70.6512		13.4687	68.5815		6.46905	74.2956		14.4679	79.7205		7.4685	70.8988		15.4694	94.4472		8.4701	110.519		16.4692	57.4813
1.46964	100.683		9.46972	83.2336		2.47049	88.7748		10.4702	66.6072		3.46952	81.9005		11.4703	69.0527		4.46958	96.3887		12.4701	66.2523		5.47098	71.5519		13.4698	72.6196		6.47016	80.6599		14.4689	68.1073		7.46961	75.0144		15.4704	86.8303		8.47114	108.885		16.4701	56.9773
1.47145	106.35		9.47104	94.1191		2.47188	61.9995		10.4719	69.8013		3.47049	84.4266		11.4712	73.7469		4.47048	92.2432		12.4717	73.4636		5.47188	79.3417		13.4714	74.573		6.47176	78.2532		14.47	75.0024		7.47058	70.3798		15.4716	81.4681		8.47218	103.925		16.4712	61.2122
1.47291	98.9236		9.47285	99.5708		2.47368	69.4344		10.4734	85.1751		3.47216	88.6615		11.4727	73.6186		4.47187	93.7374		12.4727	76.5711		5.47327	84.7695		13.4731	79.1986		6.47343	70.7675		14.4717	80.6987		7.47211	71.7398		15.4734	74.4507		8.47385	103.51		16.4729	68.3489
1.47367	106.898		9.47424	91.6617		2.47507	69.7386		10.4743	86.9049		3.4739	92.4639		11.4745	72.8045		4.47368	90.8744		12.4738	71.3252		5.47507	76.0313		13.4742	78.9212		6.47454	81.3488		14.4733	76.1596		7.47391	72.3243		15.4749	75.9389		8.47551	110.969		16.4746	68.0715
1.47478	85.867		9.47514	82.2525		2.47597	63.3237		10.4755	78.1846		3.47501	88.071		11.4756	71.8203		4.47499	95.4791		12.4755	69.008		5.47639	77.2034		13.4752	74.1465		6.47551	69.1899		14.4744	80.2215		7.47509	85.6732		15.4758	80.7971		8.47649	97.1611		16.4757	76.9081
1.47652	92.789		9.47639	82.9831		2.47729	73.6365		10.4773	81.0357		3.47591	79.622		11.4764	68.2415		4.4759	95.6341		12.4771	67.5705		5.47723	75.7361		13.4767	71.1731		6.47704	65.1608		14.4754	76.7948		7.476	81.1102		15.477	74.3404		8.47739	108.223		16.4767	65.4858
1.47798	102.711		9.47826	88.2618		2.47903	76.4369		10.4788	78.3754		3.47751	76.1954		11.4778	75.7987		4.47736	92.0822		12.4782	74.9607		5.47841	74.1197		13.4785	68.2176		6.47884	66.3537		14.4772	64.2989		7.47752	83.1263		15.4788	82.3956		8.47892	120.119		16.4782	64.448
1.47902	104.238		9.47972	100.272		2.48056	71.8412		10.4798	82.4314		3.47931	84.9574		11.4795	77.7044		4.47923	96.845		12.4792	78.2084		5.48014	73.0639		13.4797	70.9614		6.48002	77.7611		14.4789	66.3328		7.47933	80.4988		15.4804	76.2669		8.48051	117.638		16.48	75.6436
1.48013	108.279		9.48049	90.5552		2.48146	79.7771		10.4809	77.8923		3.48035	85.3392		11.4808	68.4055		4.48048	85.709		12.4809	73.2965		5.4816	71.698		13.4806	65.5186		6.481	70.9375		14.4798	75.2559		7.48044	80.5287		15.4812	89.0104		8.4817	110.039		16.4812	74.4686
1.48173	106.192		9.4816	77.7313		2.48264	76.249		10.4826	76.6874		3.48119	85.0857		11.4818	59.9894		4.48124	88.7301		12.4826	77.5493		5.48257	69.7685		13.4822	66.7205		6.48252	65.5216		14.4807	65.802		7.48127	70.5468		15.4822	90.1109		8.48267	111.73		16.4821	65.9541
1.48339	105.819		9.48333	81.647		2.48451	74.4656		10.4842	78.5246		3.48265	82.0974		11.4831	61.913		4.48249	89.2758		12.4836	88.7211		5.48376	63.8963		13.484	78.96		6.48433	77.7014		14.4823	71.2298		7.48266	68.4264		15.4839	83.4722		8.48413	110.516		16.4837	68.3012
1.48451	103.415		9.48479	85.9714		2.48597	72.5897		10.4851	72.0648		3.48431	78.4172		11.4849	67.0665		4.48423	87.0659		12.4845	79.3238		5.48542	74.0332		13.4851	70.2009		6.48551	74.0153		14.484	81.8319		7.48433	85.6881		15.4854	79.0017		8.48593	117.894		16.4855	73.1623
1.48548	100.275		9.48576	92.121		2.48681	60.9348		10.4861	68.9871		3.48556	81.5665		11.4863	75.4885		4.48569	91.2591		12.486	75.7748		5.48702	78.9331		13.4859	63.3565		6.48627	73.72		14.4851	65.3427		7.48565	80.0724		15.4865	76.8515		8.48725	109.377		16.4866	68.4115
1.48707	103.358		9.48688	79.798		2.48785	62.9777		10.4877	71.9933		3.48653	88.059		11.4872	71.2387		4.48666	76.0075		12.4876	73.3741		5.48806	70.6423		13.4873	61.8772		6.48759	74.4895		14.486	60.6366		7.48655	63.2223		15.4875	77.4807		8.48815	98.5479		16.4874	68.8469
1.48881	118.488		9.48854	85.2706		2.48952	78.4709		10.4893	67.0605		3.48785	88.3334		11.4884	64.0185		4.48784	92.2134		12.4888	71.8442		5.4891	70.526		13.489	66.3984		6.48933	61.8057		14.4876	67.9373		7.48787	75.5959		15.4891	72.9387		8.48947	111.259		16.4888	73.9586
1.48999	105.914		9.49021	89.5025		2.49104	80.6509		10.4904	61.9041		3.48966	79.2284		11.4901	70.1711		4.48958	103.129		12.4898	69.0199		5.4907	65.7214		13.4903	73.1325		6.49065	63.5503		14.4894	70.4604		7.48961	75.1903		15.4909	69.2257		8.49128	118.69		16.4905	67.5466
1.49096	102.523		9.49132	90.7849		2.49208	71.7219		10.4914	59.9805		3.49112	78.9868		11.4917	67.9313		4.49118	100.573		12.4912	69.3509		5.49244	81.3339		13.4913	78.3307		6.49162	82.1481		14.4907	80.5376		7.49114	71.2089		15.492	76.9499		8.49267	116.46		16.4918	58.2925
1.49249	102.643		9.49229	82.5268		2.49313	72.3422		10.493	69.339		3.49202	79.2135		11.4928	74.0481		4.49222	95.0079		12.493	71.2835		5.49355	89.2937		13.4925	79.8785		6.49287	82.9951		14.4916	88.745		7.49204	80.3438		15.4929	79.5087		8.49357	114.056		16.4928	56.342
1.4943	94.307		9.49382	70.9107		2.49472	82.9801		10.4947	71.3342		3.49327	70.186		11.4938	73.2458		4.49326	85.6046		12.4943	73.2965		5.49452	78.2561		13.4943	84.9574		6.49461	81.9393		14.4929	81.9721		7.49322	75.2738		15.4945	84.9097		8.49482	105.207		16.4941	68.3519
1.49541	103.111		9.49563	80.4571		2.49646	78.787		10.4959	70.5916		3.49501	82.2554		11.4955	68.5338		4.49493	89.1386		12.4953	69.5835		5.49612	73.9497		13.4958	77.2422		6.49614	69.7685		14.4947	73.3353		7.49502	71.9098		15.4963	74.3493		8.49669	102.389		16.4958	76.0582
1.49624	121.035		9.49681	81.5516		2.49764	80.9283		10.4968	58.9814		3.49653	79.962		11.4972	73.3055		4.49659	94.1161		12.4966	68.9334		5.49792	81.3548		13.4968	72.0678		6.49711	73.4427		14.4961	72.205		7.49662	83.9076		15.4975	81.6083		8.49815	111.989		16.4973	65.6827
1.49763	118.016		9.49771	82.5656		2.49861	71.0986		10.4982	74.3344		3.49751	73.3413		11.4982	75.1158		4.4977	92.9799		12.4984	72.536		5.49896	70.1174		13.4979	67.2633		6.49822	67.3319		14.497	64.1766		7.49752	84.3639		15.4984	84.4624		8.49892	98.357		16.4982	71.9157
1.4993	99.7975		9.49924	82.3032		2.50007	69.8609		10.5	84.6532		3.49869	84.3908		11.4991	71.9157		4.49868	86.8244		12.4998	66.98		5.4998	74.5372		13.4997	72.5122		6.49995	72.0022		14.4983	68.7932		7.49864	69.673		15.4999	77.7104		8.50003	103.534		16.4994	71.1642
