# Supplementary material for: Binding and sequestration of poison frog alkaloids by a plasma globulin
Source: eLife journal article supplement (doi:10.7554/elife.85096), 2023-12-14
Supplement: fig5-data1 [file BSA+PTX_R2 analysis_CapillaryShapeRawData.xlsx]

## Sheet: RawData
NanoTemper Technologies	NanoTemper Technologies
MO.Affinity Analysis v3.0.5	MO.Affinity Analysis v3.0.5
Origin of exported data	Origin of exported data
Project Title:	20230407_BSA+PTX
Comment:
Project File Path:	C:\Users\nanotemper\Desktop\Aurora_MST\20230407_BSA\BSA+PTX analysis.nta3
Analysis-Set Name:	Analysis-Set #1
Exported from:	Capillary Shape (Raw Data Inspection)
Exported on:	2023-04-07 09:24:18
Sample Information	Sample Information		Sample Information	Sample Information		Sample Information	Sample Information		Sample Information	Sample Information		Sample Information	Sample Information		Sample Information	Sample Information		Sample Information	Sample Information		Sample Information	Sample Information		Sample Information	Sample Information		Sample Information	Sample Information		Sample Information	Sample Information		Sample Information	Sample Information		Sample Information	Sample Information		Sample Information	Sample Information		Sample Information	Sample Information		Sample Information	Sample Information
Merge-Set Name:	BSA+PTX_R2 (#17)		Merge-Set Name:	BSA+PTX_R2 (#17)		Merge-Set Name:	BSA+PTX_R2 (#17)		Merge-Set Name:	BSA+PTX_R2 (#17)		Merge-Set Name:	BSA+PTX_R2 (#17)		Merge-Set Name:	BSA+PTX_R2 (#17)		Merge-Set Name:	BSA+PTX_R2 (#17)		Merge-Set Name:	BSA+PTX_R2 (#17)		Merge-Set Name:	BSA+PTX_R2 (#17)		Merge-Set Name:	BSA+PTX_R2 (#17)		Merge-Set Name:	BSA+PTX_R2 (#17)		Merge-Set Name:	BSA+PTX_R2 (#17)		Merge-Set Name:	BSA+PTX_R2 (#17)		Merge-Set Name:	BSA+PTX_R2 (#17)		Merge-Set Name:	BSA+PTX_R2 (#17)		Merge-Set Name:	BSA+PTX_R2 (#17)
Run Name:	BSA+PTX_R2 (#17)		Run Name:	BSA+PTX_R2 (#17)		Run Name:	BSA+PTX_R2 (#17)		Run Name:	BSA+PTX_R2 (#17)		Run Name:	BSA+PTX_R2 (#17)		Run Name:	BSA+PTX_R2 (#17)		Run Name:	BSA+PTX_R2 (#17)		Run Name:	BSA+PTX_R2 (#17)		Run Name:	BSA+PTX_R2 (#17)		Run Name:	BSA+PTX_R2 (#17)		Run Name:	BSA+PTX_R2 (#17)		Run Name:	BSA+PTX_R2 (#17)		Run Name:	BSA+PTX_R2 (#17)		Run Name:	BSA+PTX_R2 (#17)		Run Name:	BSA+PTX_R2 (#17)		Run Name:	BSA+PTX_R2 (#17)
Date of Measurement:	2023-04-07 08:52:31		Date of Measurement:	2023-04-07 08:52:58		Date of Measurement:	2023-04-07 08:53:25		Date of Measurement:	2023-04-07 08:53:51		Date of Measurement:	2023-04-07 08:54:18		Date of Measurement:	2023-04-07 08:54:44		Date of Measurement:	2023-04-07 08:55:11		Date of Measurement:	2023-04-07 08:55:38		Date of Measurement:	2023-04-07 08:56:05		Date of Measurement:	2023-04-07 08:56:31		Date of Measurement:	2023-04-07 08:56:58		Date of Measurement:	2023-04-07 08:57:24		Date of Measurement:	2023-04-07 08:57:51		Date of Measurement:	2023-04-07 08:58:18		Date of Measurement:	2023-04-07 08:58:45		Date of Measurement:	2023-04-07 08:59:11
Capillary Type:	Monolith Premium Capillary		Capillary Type:	Monolith Premium Capillary		Capillary Type:	Monolith Premium Capillary		Capillary Type:	Monolith Premium Capillary		Capillary Type:	Monolith Premium Capillary		Capillary Type:	Monolith Premium Capillary		Capillary Type:	Monolith Premium Capillary		Capillary Type:	Monolith Premium Capillary		Capillary Type:	Monolith Premium Capillary		Capillary Type:	Monolith Premium Capillary		Capillary Type:	Monolith Premium Capillary		Capillary Type:	Monolith Premium Capillary		Capillary Type:	Monolith Premium Capillary		Capillary Type:	Monolith Premium Capillary		Capillary Type:	Monolith Premium Capillary		Capillary Type:	Monolith Premium Capillary
Capillary Position:	1		Capillary Position:	9		Capillary Position:	2		Capillary Position:	10		Capillary Position:	3		Capillary Position:	11		Capillary Position:	4		Capillary Position:	12		Capillary Position:	5		Capillary Position:	13		Capillary Position:	6		Capillary Position:	14		Capillary Position:	7		Capillary Position:	15		Capillary Position:	8		Capillary Position:	16
Ligand:	PTX		Ligand:	PTX		Ligand:	PTX		Ligand:	PTX		Ligand:	PTX		Ligand:	PTX		Ligand:	PTX		Ligand:	PTX		Ligand:	PTX		Ligand:	PTX		Ligand:	PTX		Ligand:	PTX		Ligand:	PTX		Ligand:	PTX		Ligand:	PTX		Ligand:	PTX
Ligand Concentration:	0.005		Ligand Concentration:	1.95313e-05		Ligand Concentration:	0.0025		Ligand Concentration:	9.76563e-06		Ligand Concentration:	0.00125		Ligand Concentration:	4.88281e-06		Ligand Concentration:	0.000625		Ligand Concentration:	2.44141e-06		Ligand Concentration:	0.0003125		Ligand Concentration:	1.2207e-06		Ligand Concentration:	0.00015625		Ligand Concentration:	6.10352e-07		Ligand Concentration:	7.8125e-05		Ligand Concentration:	3.05176e-07		Ligand Concentration:	3.90625e-05		Ligand Concentration:	1.52588e-07
Target:	BSA		Target:	BSA		Target:	BSA		Target:	BSA		Target:	BSA		Target:	BSA		Target:	BSA		Target:	BSA		Target:	BSA		Target:	BSA		Target:	BSA		Target:	BSA		Target:	BSA		Target:	BSA		Target:	BSA		Target:	BSA
TargetConcentration:	5e-09		TargetConcentration:	5e-09		TargetConcentration:	5e-09		TargetConcentration:	5e-09		TargetConcentration:	5e-09		TargetConcentration:	5e-09		TargetConcentration:	5e-09		TargetConcentration:	5e-09		TargetConcentration:	5e-09		TargetConcentration:	5e-09		TargetConcentration:	5e-09		TargetConcentration:	5e-09		TargetConcentration:	5e-09		TargetConcentration:	5e-09		TargetConcentration:	5e-09		TargetConcentration:	5e-09
Measurement Settings	Measurement Settings		Measurement Settings	Measurement Settings		Measurement Settings	Measurement Settings		Measurement Settings	Measurement Settings		Measurement Settings	Measurement Settings		Measurement Settings	Measurement Settings		Measurement Settings	Measurement Settings		Measurement Settings	Measurement Settings		Measurement Settings	Measurement Settings		Measurement Settings	Measurement Settings		Measurement Settings	Measurement Settings		Measurement Settings	Measurement Settings		Measurement Settings	Measurement Settings		Measurement Settings	Measurement Settings		Measurement Settings	Measurement Settings		Measurement Settings	Measurement Settings
MST-Power:	Medium		MST-Power:	Medium		MST-Power:	Medium		MST-Power:	Medium		MST-Power:	Medium		MST-Power:	Medium		MST-Power:	Medium		MST-Power:	Medium		MST-Power:	Medium		MST-Power:	Medium		MST-Power:	Medium		MST-Power:	Medium		MST-Power:	Medium		MST-Power:	Medium		MST-Power:	Medium		MST-Power:	Medium
Excitation-Power:	30		Excitation-Power:	30		Excitation-Power:	30		Excitation-Power:	30		Excitation-Power:	30		Excitation-Power:	30		Excitation-Power:	30		Excitation-Power:	30		Excitation-Power:	30		Excitation-Power:	30		Excitation-Power:	30		Excitation-Power:	30		Excitation-Power:	30		Excitation-Power:	30		Excitation-Power:	30		Excitation-Power:	30
Excitation type:	Pico - RED		Excitation type:	Pico - RED		Excitation type:	Pico - RED		Excitation type:	Pico - RED		Excitation type:	Pico - RED		Excitation type:	Pico - RED		Excitation type:	Pico - RED		Excitation type:	Pico - RED		Excitation type:	Pico - RED		Excitation type:	Pico - RED		Excitation type:	Pico - RED		Excitation type:	Pico - RED		Excitation type:	Pico - RED		Excitation type:	Pico - RED		Excitation type:	Pico - RED		Excitation type:	Pico - RED
Thermostat Setpoint:	25		Thermostat Setpoint:	25		Thermostat Setpoint:	25		Thermostat Setpoint:	25		Thermostat Setpoint:	25		Thermostat Setpoint:	25		Thermostat Setpoint:	25		Thermostat Setpoint:	25		Thermostat Setpoint:	25		Thermostat Setpoint:	25		Thermostat Setpoint:	25		Thermostat Setpoint:	25		Thermostat Setpoint:	25		Thermostat Setpoint:	25		Thermostat Setpoint:	25		Thermostat Setpoint:	25
Included	Included		Included	Included		Included	Included		Included	Included		Included	Included		Included	Included		Included	Included		Included	Included		Included	Included		Included	Included		Included	Included		Included	Included		Included	Included		Included	Included		Included	Included		Included	Included
Position [mm]	Relative Fluorescence [-]		Position [mm]	Relative Fluorescence [-]		Position [mm]	Relative Fluorescence [-]		Position [mm]	Relative Fluorescence [-]		Position [mm]	Relative Fluorescence [-]		Position [mm]	Relative Fluorescence [-]		Position [mm]	Relative Fluorescence [-]		Position [mm]	Relative Fluorescence [-]		Position [mm]	Relative Fluorescence [-]		Position [mm]	Relative Fluorescence [-]		Position [mm]	Relative Fluorescence [-]		Position [mm]	Relative Fluorescence [-]		Position [mm]	Relative Fluorescence [-]		Position [mm]	Relative Fluorescence [-]		Position [mm]	Relative Fluorescence [-]		Position [mm]	Relative Fluorescence [-]
-2.24816	0.00610748		-2.24688	0.00414399		-2.2425	0.00303664		-2.24514	0.00200361		-2.24841	0.00164015		-2.24848	0.00155869		-2.24877	0.00162037		-2.24731	0.00218743		-2.24404	0.00147469		-2.24461	0.00181964		-2.24301	0.00162191		-2.24971	0.00133207		-2.24927	4.79453e-05		-2.24176	0.00131107		-2.24362	0.000866774		-2.24538	0.00188676
-2.24379	0.00465117		-2.24125	0.0034127		-2.23656	0.00321973		-2.24108	0.00231725		-2.24091	0.000845773		-2.24098	0.00153411		-2.24096	0.00192381		-2.242	0.00189177		-2.23623	0.00198584		-2.23961	0.000839579		-2.23864	0.00103476		-2.24283	0.00124446		-2.24145	0.000405861		-2.23614	0.000972392		-2.23675	0.00120221		-2.23819	0.00206137
-2.23848	0.00494821		-2.23782	0.00418809		-2.2325	0.00387191		-2.23514	0.00278839		-2.23685	0.000394927		-2.23567	0.00182454		-2.23596	0.00167425		-2.23356	0.00160651		-2.23029	0.00168625		-2.23523	0.00137958		-2.23395	0.00204048		-2.23908	0.00111194		-2.23739	0.000450461		-2.2327	0.00147517		-2.23237	0.00090362		-2.23351	0.00208672
-2.23066	0.00549197		-2.23219	0.0047718		-2.22625	0.00313057		-2.22702	0.00215497		-2.23278	0		-2.23129	0.00216813		-2.23221	0.00168991		-2.227	0.00109642		-2.22623	0.00184573		-2.22774	0.00166776		-2.22645	0.00217824		-2.23439	0.000885614		-2.23333	0.000515577		-2.22708	0.00194435		-2.22768	0.000199506		-2.22882	0.00198663
-2.22348	0.0048365		-2.22438	0.0046262		-2.21781	0.00269045		-2.22077	0.00240033		-2.2256	0.000382181		-2.22473	0.00135829		-2.22596	0.00207417		-2.22325	0.0014198		-2.22029	0.00210701		-2.21992	0.0014771		-2.21864	0.00134528		-2.22689	0.00117256		-2.22645	0.000770021		-2.21926	0.00082662		-2.22018	0		-2.221	0.001899
-2.2191	0.00557529		-2.21813	0.00553212		-2.21187	0.00225395		-2.21702	0.00214609		-2.2181	0.000909505		-2.21692	0.000855188		-2.21815	0.00169304		-2.21856	0.00152399		-2.21216	0.00153861		-2.21555	0.00114333		-2.21426	0.0018488		-2.22002	0.00150043		-2.21896	0.0017432		-2.21302	0.000986358		-2.21237	0.0012878		-2.2135	0.00112716
-2.2141	0.00620236		-2.21375	0.00521811		-2.20843	0.00347637		-2.21202	0.00178966		-2.2131	0.000676989		-2.21098	0.00115946		-2.21252	0.00146687		-2.21106	0.00135612		-2.2056	0.00233213		-2.2118	0.00180232		-2.2102	0.00217824		-2.21533	0.00165464		-2.21395	0.00132931		-2.20864	0.00123338		-2.20737	0.00166165		-2.20913	0.0013081
-2.2066	0.00603862		-2.20813	0.00417014		-2.20312	0.00267196		-2.2042	0.00173822		-2.20872	0.000863659		-2.20692	0.00181404		-2.20815	0.00182649		-2.20387	0.00120732		-2.20123	0.00222495		-2.20492	0.00123888		-2.20333	0.00221279		-2.21064	0.00178539		-2.20927	0.00201637		-2.20333	0.000829894		-2.203	0.00118693		-2.20507	0.00170561
-2.1991	0.0064404		-2.20063	0.00367663		-2.19531	0.00306045		-2.19764	0.00167449		-2.20185	0.00165824		-2.20098	0.00183973		-2.20221	0.00243567		-2.1995	0.00080423		-2.19591	0.00279636		-2.19742	0.00145803		-2.19583	0.0015308		-2.20346	0.00127234		-2.2027	0.0016056		-2.19551	0.001442		-2.19643	0.000514493		-2.19819	0.0016466
-2.19441	0.00645604		-2.19344	0.00427031		-2.18906	0.00252011		-2.19295	0.00262679		-2.19403	0.00272851		-2.19285	0.00205196		-2.1944	0.00170202		-2.19481	0.00155843		-2.1881	0.00270144		-2.19211	0.000552926		-2.19051	0.000971824		-2.19564	0.000989153		-2.19489	0.0014417		-2.18833	0.00129514		-2.18831	0.000194788		-2.19069	0.00170123
-2.18973	0.00547157		-2.18875	0.00328062		-2.18468	0.0025144		-2.18795	0.00227196		-2.18841	0.00235723		-2.18629	0.00154975		-2.18784	0.00133113		-2.18762	0.00132342		-2.18123	0.00219439		-2.18774	0		-2.18614	0.00136905		-2.19033	0.00230065		-2.18895	0.00134848		-2.18364	0		-2.18237	0.00146709		-2.18538	0.00182055
-2.18223	0.00510379		-2.18406	0.00286822		-2.17937	0.00373416		-2.18045	0.00215201		-2.18403	0.00191789		-2.18223	0.00148116		-2.18346	0.00142093		-2.17981	0.00216685		-2.17685	0.00295842		-2.18149	0.00111418		-2.17958	0.00131447		-2.18595	0.00129645		-2.18489	0.000535201		-2.17895	0.000892305		-2.17831	0.00171063		-2.18101	0.00184306
-2.17441	0.00452093		-2.17625	0.00409347		-2.17187	0.0034678		-2.17295	0.00203365		-2.1781	0.00179681		-2.17661	0.00176399		-2.17815	0.0015644		-2.1745	0.00186903		-2.17185	0.00215672		-2.17336	0.000765943		-2.17145	0.00156139		-2.17939	0.00139291		-2.17895	0.000741031		-2.17145	0.000918273		-2.17206	0.00120895		-2.17444	0.00159962
-2.17004	0.00482698		-2.16875	0.00423928		-2.16468	0.00322354		-2.16795	0.00400859		-2.16997	0.00119424		-2.16817	0.00162213		-2.17034	0.00217963		-2.17012	0.000907981		-2.16404	0.00249419		-2.16711	0.000983344		-2.16551	0.000791368		-2.17127	0.00121636		-2.17083	0.00102357		-2.16395	8.77248e-05		-2.16362	0.000983377		-2.16632	0.00254693
-2.16629	0.00495825		-2.16437	0.00407707		-2.16	0.00354153		-2.16358	0.00300485		-2.16372	0.00126105		-2.1616	0.00137103		-2.16315	0.00107175		-2.16356	0.0012684		-2.15654	0.00281745		-2.16305	0.00100548		-2.16145	0.000661087		-2.16564	0.000830969		-2.16427	0.000704013		-2.15895	0.00125652		-2.158	0.00116985		-2.16038	0.00247198
-2.15941	0.00500398		-2.15969	0.00342843		-2.15531	0.00276628		-2.15639	0.001926		-2.15966	0.00122014		-2.15817	0.00132925		-2.15877	0.00107656		-2.15543	0.00126775		-2.15248	0.00208247		-2.15742	0.00111988		-2.15551	0.000694097		-2.16158	0.00143893		-2.16021	0.000742815		-2.15457	0.00187823		-2.15456	0.000878906		-2.15632	0.00214681
-2.15191	0.00485538		-2.15219	0.0035953		-2.14781	0.0019291		-2.14858	0.00209329		-2.15372	0.00172177		-2.15317	0.00199097		-2.15377	0.00180519		-2.14981	0.00137713		-2.14841	0.00182614		-2.1493	0.0010767		-2.14739	0.0012687		-2.15502	0.00106349		-2.15458	0.00107442		-2.14739	0.00157272		-2.14893	0.00155965		-2.15038	0.00124823
-2.1466	0.00485997		-2.14437	0.00489058		-2.14	0.00299662		-2.14358	0.0024941		-2.14528	0.00263888		-2.14567	0.00108083		-2.14596	0.00200212		-2.14575	0.00135894		-2.14123	0.00220601		-2.14274	0.0010835		-2.14083	0.00133362		-2.14689	0.00100973		-2.14614	0.000893117		-2.13926	0.00175384		-2.14112	0.0014426		-2.14226	0.00156553
-2.14223	0.00384676		-2.14	0.00457147		-2.135	0.00334319		-2.1392	0.00146965		-2.13903	0.00186136		-2.13879	0.00152741		-2.13846	0.00112354		-2.13918	0.00141872		-2.13373	0.00238034		-2.13867	0.00121609		-2.13677	0.00119233		-2.14127	0.0013115		-2.13958	0.00185247		-2.13458	0.00113649		-2.13487	0.00161672		-2.13569	0.00189376
-2.13566	0.00416404		-2.13625	0.00381402		-2.13062	0.00391344		-2.13201	0.00174323		-2.1356	0.00129806		-2.1341	0.00136455		-2.1344	0.000720279		-2.13106	0.00157619		-2.12873	0.0019938		-2.13305	0.000522244		-2.13114	0.00151077		-2.13751	0.00114402		-2.13614	0.00114377		-2.13082	0.00137763		-2.13081	0.00156729		-2.13163	0.0020511
-2.12785	0.00516687		-2.12937	0.00462576		-2.12343	0.00276913		-2.1242	0.00200361		-2.13028	0.00105609		-2.12911	0.00167553		-2.13034	0.00148692		-2.12544	0.00130392		-2.12435	0.00160468		-2.12461	0.000777778		-2.1227	0.00193419		-2.13189	0.000752871		-2.13114	0.000505096		-2.12426	0.00189918		-2.12519	0.00122512		-2.12601	0.00185683
-2.12191	0.00579071		-2.12188	0.00372361		-2.11531	0.00229605		-2.1192	0.00118196		-2.12278	0.00218618		-2.12192	0.00109334		-2.12315	0.00151511		-2.122	0.00135916		-2.11748	0.00228521		-2.11805	0.00164913		-2.11614	0.00159594		-2.12408	0.00148406		-2.12333	0.000836029		-2.11676	0.00188783		-2.11737	0.000745902		-2.11757	0.00249514
-2.11785	0.00574702		-2.11656	0.0039122		-2.11062	0.0024742		-2.11545	0.00136632		-2.11622	0.00201041		-2.11442	0.00127072		-2.11565	0.00168699		-2.11606	0.00151142		-2.10935	0.00302341		-2.1143	0.00132238		-2.11239	0.00144607		-2.11814	0.00224114		-2.11677	0.00105725		-2.11114	0.00120589		-2.11018	0.000991241		-2.11101	0.00213807
-2.11191	0.00511739		-2.11219	0.00443917		-2.10687	0.00317267		-2.1092	0.00150333		-2.11185	0.00159061		-2.10942	0.00220544		-2.11096	0.00169806		-2.10825	0.00178672		-2.10341	0.00303224		-2.10961	0.00169801		-2.1077	0.00175571		-2.11376	0.00154933		-2.11239	0.00162144		-2.10676	0.00177654		-2.10581	0.00272187		-2.10757	0.0018636
-2.10379	0.00480964		-2.10562	0.00376904		-2.10031	0.00293889		-2.1017	0.00224146		-2.10653	0.000414458		-2.10504	0.00181917		-2.10627	0.00154769		-2.10231	0.0015281		-2.09935	0.00223808		-2.10211	0.00160859		-2.09989	0.00149383		-2.10814	0.000959507		-2.10739	0.00144393		-2.10051	0.00169754		-2.10112	0.00176613		-2.10257	0.00255043
-2.09754	0.00536904		-2.09781	0.00355962		-2.0925	0.00258566		-2.09577	0.0024347		-2.09903	0.000691997		-2.09817	0.00148496		-2.0994	0.00125198		-2.09794	0.000953033		-2.0931	0.00182571		-2.09524	0.000570896		-2.09301	0.00122644		-2.10064	0.00079557		-2.09989	0.000839374		-2.09239	0.00187539		-2.09331	0.00101528		-2.09476	0.00187824
-2.09316	0.00599237		-2.09188	0.00435474		-2.08718	0.001943		-2.09139	0.00196128		-2.09153	0.00173595		-2.09036	0.00118203		-2.09159	0.000908233		-2.09231	0.00114256		-2.08498	0.00311983		-2.09055	0.000985755		-2.08864	0.00123899		-2.09346	0.00130021		-2.09239	0.00157795		-2.08614	0.00161243		-2.08581	0.00131139		-2.08788	0.00108521
-2.08754	0.00595564		-2.08781	0.0029296		-2.08312	0.00267368		-2.08545	0.00283414		-2.08685	0.00202172		-2.08504	0.000945443		-2.08565	0.00128101		-2.08481	0.000815493		-2.07904	0.00216512		-2.08586	0.00143721		-2.08364	0.000932652		-2.08877	0.00121592		-2.08739	0.00126977		-2.08208	0.00229023		-2.08112	0.000736241		-2.08351	0.000772494
-2.07941	0.00488309		-2.08187	0.00308162		-2.07687	0.00314295		-2.07764	0.00247111		-2.08216	0.0011706		-2.08067	0.00116572		-2.08159	0.00106382		-2.07762	0.00155431		-2.07498	0.00245502		-2.07836	0.00072277		-2.07645	0.00167913		-2.08408	0.00141968		-2.08301	0.000718731		-2.07645	0.00150463		-2.07643	0.00126197		-2.07851	0.00145801
-2.07285	0.00475455		-2.07375	0.00361436		-2.06875	0.00253555		-2.07108	0.00162556		-2.07497	0.00155504		-2.07379	0.00201599		-2.07534	0.00144411		-2.07325	0.00192924		-2.06904	0.00172542		-2.07055	0.000397545		-2.06864	0.00187389		-2.07627	0.000773889		-2.07583	0.000231475		-2.06832	0.00143917		-2.06893	0.00112514		-2.07101	0.00163917
-2.06941	0.00525019		-2.06719	0.00465257		-2.0625	0.00295776		-2.0667	0.00133445		-2.06716	0.00151022		-2.06567	0.00159086		-2.06721	0.00151261		-2.06825	0.00177242		-2.0606	0.00123407		-2.06555	0.000871795		-2.06364	0.000953778		-2.06877	0.000987826		-2.06802	0.000139598		-2.06145	0.00149699		-2.06112	0.000599418		-2.06351	0.00136798
-2.06441	0.00578119		-2.06312	0.00369569		-2.05843	0.00266911		-2.06139	0.00161964		-2.06216	0.00110049		-2.06035	0.00122581		-2.06127	0.000759332		-2.06043	0.00140334		-2.05435	0.00159284		-2.06117	0.00161319		-2.05927	0.0009584		-2.06408	0.000877428		-2.06271	0.000409429		-2.05739	0.00220752		-2.05675	0.00147383		-2.0585	0.00190446
-2.0566	0.00614387		-2.0575	0.00468138		-2.05281	0.00228462		-2.05358	0.00208305		-2.05778	0.00126455		-2.05692	0.000943433		-2.05721	0.00102309		-2.05293	0.00138731		-2.05091	0.0017082		-2.05461	0.0019336		-2.05239	0.00149999		-2.05939	0.000900658		-2.05864	0		-2.05207	0.00141953		-2.053	0.00184409		-2.05413	0.00222548
-2.04973	0.00501623		-2.04938	0.00396959		-2.04468	0.00258089		-2.0467	0.00224123		-2.0506	0.000945893		-2.05067	0.00128859		-2.05096	0.000961696		-2.04825	0.0016429		-2.0456	0.00234612		-2.04649	0.00147688		-2.04426	0.00113622		-2.05189	0.00181282		-2.05176	0.000822426		-2.04395	0.000932894		-2.04612	0.00165559		-2.04695	0.00187256
-2.04535	0.00512385		-2.04281	0.0039933		-2.03781	0.00303854		-2.04233	0.00151085		-2.04278	0.00115209		-2.04317	0.000394977		-2.04284	0.00127767		-2.04387	0.00150319		-2.03779	0.00178783		-2.04086	0.00104558		-2.03895	0.00144827		-2.04408	0.00221304		-2.04364	0.00083313		-2.03676	0.000655099		-2.03862	0.00107819		-2.03913	0.00125478
-2.04035	0.00546953		-2.03906	0.0041318		-2.03375	0.0028242		-2.03733	0.00131488		-2.03778	0.00198409		-2.03723	0.000537732		-2.03659	0.00176342		-2.03606	0.000810511		-2.03123	0.002271		-2.0368	0.00136884		-2.03489	0.00131601		-2.03971	0.00197145		-2.03833	0.000828001		-2.03302	0.00152187		-2.03331	0.000850598		-2.03382	0.00136973
-2.03316	0.00519442		-2.03438	0.0038322		-2.02843	0.00232692		-2.02952	0.00159756		-2.03403	0.000862426		-2.03285	0.00137885		-2.03315	0.00256974		-2.02856	0.00111202		-2.02685	0.00236979		-2.02992	0.00150997		-2.02802	0.00154664		-2.03595	0.00167322		-2.03489	0.00100283		-2.02864	0.00182716		-2.02893	0.000720739		-2.02976	0.00124473
-2.02535	0.00595768		-2.02656	0.00420183		-2.02031	0.00248163		-2.02201	0.00160325		-2.02778	0.000517867		-2.02723	0.00181917		-2.02784	0.00275811		-2.02419	0.00139641		-2.02185	0.00206095		-2.0218	0.00124545		-2.01989	0.000938374		-2.02908	0.00147499		-2.02864	0.000743707		-2.02114	0.0017486		-2.02237	0.000578523		-2.02288	0.00189288
-2.02035	0.00599696		-2.01969	0.00376704		-2.01343	0.00242409		-2.01795	0.00197766		-2.01997	0.00111262		-2.01942	0.00187503		-2.02034	0.00121418		-2.02012	0.00222663		-2.01404	0.00107072		-2.01649	0.00103353		-2.01458	0.000841103		-2.02158	0.00121238		-2.02083	0.00145107		-2.01395	0.00137479		-2.01456	0.000250506		-2.01445	0.00199166
-2.01598	0.00584325		-2.01532	0.00382245		-2.00937	0.0028423		-2.01358	0.00115965		-2.01435	0.00157005		-2.01254	0.00178097		-2.01377	0.00138396		-2.01325	0.00230894		-2.00654	0.00115788		-2.01305	0.000532544		-2.01083	0.00171434		-2.01627	0.00153119		-2.01489	0.00103272		-2.00927	0.00112427		-2.00831	0.00143833		-2.00945	0.00273684
-2.0091	0.00553669		-2.01031	0.00376217		-2.005	0.00274322		-2.00639	0.00166334		-2.01028	0.00116217		-2.00817	0.00092556		-2.0094	0.0010398		-2.00575	0.00205249		-2.00185	0.00174479		-2.0068	0.000958142		-2.00458	0.00122622		-2.01189	0.000973003		-2.01052	0.00036416		-2.00458	0.00119323		-2.00425	0.00134577		-2.00601	0.0024121
-2.00098	0.00529389		-2.00313	0.00295974		-1.9975	0.0023454		-1.9992	0.00229631		-2.00403	0.00152934		-2.00286	0.00145101		-2.00409	0.000776666		-2.00044	0.00107		-1.99748	0.00194		-1.9993	0.00151545		-1.99707	0.000961041		-2.00533	0.000943357		-2.00489	0.00025266		-1.99739	0.000243971		-1.99862	0.00113975		-1.99976	0.00148118
-1.99566	0.00590463		-1.99531	0.00403519		-1.99062	0.002961		-1.9942	0.00234115		-1.99622	0.00216398		-1.99504	0.00179527		-1.99659	0.000937052		-1.99637	0.00155908		-1.98998	0.002896		-1.99336	0.000691431		-1.99114	0.00190536		-1.99752	0.000767916		-1.99708	0.000601655		-1.98957	0.00050649		-1.9905	0.00129791		-1.99195	0.00174778
-1.9916	0.00533792		-1.99031	0.00372538		-1.98593	0.00303644		-1.98983	0.00145167		-1.98966	0.00223552		-1.98786	0.00149211		-1.98909	0.00123715		-1.98981	0.00214324		-1.98216	0.00320592		-1.9893	0.00118256		-1.98676	0.00224272		-1.99127	0.000662828		-1.9902	0.000713602		-1.98426	0.00178745		-1.98394	0.00202539		-1.98601	0.00174778
-1.98473	0.00518898		-1.98594	0.00447352		-1.98125	0.00255879		-1.98295	0.00197129		-1.9856	0.000660336		-1.98348	0.00193356		-1.9844	0.00225001		-1.98169	0.0018896		-1.97716	0.00195743		-1.98336	0.00105194		-1.98114	0.0015473		-1.98721	0.000939817		-1.98614	0.00132195		-1.97989	0.00107103		-1.97987	0.00119322		-1.98194	0.00223532
-1.9766	0.00538281		-1.97906	0.00490675		-1.97406	0.00209543		-1.97483	0.00188048		-1.98028	0.00106513		-1.97879	0.00157566		-1.97971	0.00192945		-1.97575	0.00131345		-1.97279	0.00200413		-1.97555	0.000219811		-1.97333	0.000881816		-1.98126	0.00106637		-1.98083	0.00132284		-1.97333	0.00122204		-1.97425	0.0009517		-1.97601	0.00191342
-1.97129	0.00523335		-1.97094	0.00385325		-1.96625	0.00239627		-1.9692	0.00118742		-1.97216	0.000926773		-1.97098	0.00151289		-1.97221	0.00101056		-1.97168	0.00147807		-1.9656	0.00149686		-1.96868	0.000430857		-1.96645	0.00079995		-1.97314	0.00107632		-1.97302	0.00182794		-1.96521	0.00162815		-1.96581	0.00105145		-1.9682	0.00138175
-1.96785	0.00576062		-1.96563	0.00461069		-1.96093	0.00241742		-1.96514	0.00231202		-1.96497	0.00194668		-1.96348	0.00114338		-1.9644	0.00121543		-1.96575	0.00218201		-1.95779	0.00152527		-1.9643	0.00130419		-1.96207	0.00192318		-1.96658	0.000894242		-1.96583	0.00191513		-1.95957	0.00186906		-1.95925	0.00174658		-1.96132	0.00128625
-1.9616	0.00602893		-1.96156	0.00553278		-1.95656	0.00227624		-1.95889	0.00230155		-1.9606	0.00183361		-1.9591	0.00118985		-1.9594	0.00135201		-1.95762	0.00177004		-1.9531	0.000685046		-1.9593	0.00124874		-1.95708	0.00145906		-1.96252	0.000575881		-1.96114	0.000921884		-1.95552	0.00220839		-1.9555	0.0015828		-1.95726	0.00124582
-1.9541	0.00573477		-1.95469	0.00571118		-1.95	0.00285963		-1.95077	0.00181037		-1.9556	0.00139407		-1.95504	0.000917518		-1.95502	0.00108094		-1.95137	0.00136934		-1.94935	0.00213047		-1.95149	0.000581854		-1.94927	0.000598587		-1.95689	0.000647784		-1.95645	0.00145441		-1.94895	0.0015042		-1.95081	0.000997532		-1.95194	0.00197942
-1.94816	0.0062452		-1.94656	0.00558021		-1.94218	0.0022328		-1.94483	0.00274014		-1.94778	0.00148288		-1.94817	0.000577945		-1.94784	0.00121689		-1.94731	0.00140876		-1.94279	0.00198175		-1.9443	0.000569801		-1.94208	0.00137169		-1.94876	0.0011876		-1.94864	0.00162188		-1.94083	0.00131936		-1.94331	0.000385982		-1.94413	0.0020382
-1.94379	0.0058623		-1.94125	0.00525157		-1.93625	0.00194967		-1.94076	0.00264887		-1.9406	0.00141483		-1.94067	0.00104575		-1.94002	0.00101056		-1.94137	0.00105288		-1.93529	0.00195334		-1.93962	0.00130046		-1.9377	0.00149955		-1.9422	0.00215154		-1.94114	0.00240908		-1.9352	0.00151096		-1.93643	0.000393171		-1.93695	0.00224952
-1.93816	0.00550778		-1.93781	0.00480969		-1.93218	0.00255174		-1.93483	0.00186136		-1.93653	0.000401095		-1.93567	0.00095505		-1.93534	0.000635283		-1.93325	0.00193184		-1.92966	0.00264936		-1.93492	0.000792242		-1.93301	0.00105193		-1.93846	0.00160906		-1.93708	0.001561		-1.93177	0.001636		-1.93206	0.000914853		-1.93257	0.00233496
-1.93035	0.00518966		-1.93188	0.00483894		-1.92593	0.00226595		-1.92639	0.00131784		-1.93216	0.000827065		-1.93129	0.00106519		-1.93159	0.00158862		-1.92669	0.00170831		-1.92529	0.00224346		-1.92711	0.000772518		-1.92489	0.00100704		-1.93345	0.00127986		-1.93302	0.000334501		-1.92583	0.00147801		-1.92706	0.000986972		-1.92757	0.00216255
-1.92348	0.0054816		-1.92406	0.00543129		-1.9175	0.00244428		-1.92045	0.000995318		-1.92497	0.00193167		-1.92473	0.00110428		-1.92502	0.00146813		-1.92325	0.00101693		-1.91935	0.001284		-1.91961	0.00113149		-1.91739	0.00159638		-1.92595	0.00164092		-1.92583	0.000531411		-1.91802	0.0017977		-1.91987	0.00121276		-1.91976	0.00197243
-1.9191	0.00578391		-1.91812	0.00511683		-1.91187	0.00342093		-1.91701	0.00161258		-1.91778	0.00130361		-1.91661	0.000659264		-1.91752	0.00204535		-1.91825	0.00199444		-1.91123	0.00217954		-1.91524	0.000689678		-1.91333	0.00152596		-1.91939	0.00169313		-1.91833	0.000639566		-1.91207	0.00156159		-1.91206	0.0013424		-1.91226	0.00159853
-1.9141	0.00585277		-1.91375	0.0053063		-1.90843	0.00321306		-1.91139	0.00191917		-1.9131	0.0012442		-1.91067	0.000447477		-1.9119	0.00222558		-1.91044	0.00144406		-1.90466	0.00226003		-1.91117	0.00125159		-1.90926	0.0010088		-1.91471	0.00173141		-1.91333	0.000690856		-1.9077	0.00259857		-1.90706	0.00216424		-1.90819	0.00116344
-1.90629	0.00640503		-1.90844	0.00571051		-1.9025	0.00308903		-1.90389	0.00231133		-1.90841	0.00243823		-1.90692	0.000633796		-1.90752	0.00125198		-1.90387	0.000808778		-1.9006	0.00173984		-1.9043	0.0015503		-1.90208	0.00157041		-1.9097	0.00190817		-1.90895	0.00101376		-1.90208	0.00218352		-1.90268	0.00177781		-1.90413	0.00114421
-1.8991	0.00552173		-1.90031	0.00513102		-1.89468	0.00263291		-1.89733	0.00185225		-1.90153	0.00224354		-1.90067	9.82972e-06		-1.90159	0.00121334		-1.89919	0.00120039		-1.89498	0.00149169		-1.8968	0.000656805		-1.89489	0.00112037		-1.9022	0.00122455		-1.90208	0.00158085		-1.89458	0.00241963		-1.89612	0.00147203		-1.89694	0.00141081
-1.89441	0.00507489		-1.89344	0.00526797		-1.88875	0.00262795		-1.89295	0.00159392		-1.89341	0.00306012		-1.89254	0.000971581		-1.89346	0.001692		-1.89419	0.00161972		-1.88716	0.000886492		-1.8918	0.00124808		-1.88989	0.000555894		-1.8947	0.000165486		-1.89395	0.00126218		-1.88739	0.00231707		-1.888	0.00139857		-1.88976	0.00190534
-1.88973	0.00548874		-1.88906	0.00575284		-1.88437	0.00207409		-1.88764	0.00158664		-1.8881	0.000922456		-1.88629	0.00133148		-1.8869	0.00106611		-1.887	0.00185906		-1.88029	0.00144606		-1.88742	0.00136226		-1.8852	0.000930451		-1.8897	0.000890039		-1.88833	0.00129697		-1.8827	0.00143982		-1.88237	0.00181735		-1.88475	0.00193965
-1.88191	0.00527569		-1.88406	0.00566353		-1.87875	0.00204913		-1.88014	0.00102195		-1.88403	0.00131615		-1.88223	0.00122291		-1.88284	0.00142448		-1.8795	0.0019405		-1.87591	0.00205794		-1.88086	0.00152509		-1.87864	0.00169585		-1.88533	0.00120044		-1.88427	0.00124791		-1.87802	0.000930712		-1.87831	0.00213256		-1.88038	0.00151112
-1.87441	0.00501146		-1.87625	0.00568059		-1.87125	0.00177972		-1.87264	0.00212037		-1.87747	0.00196682		-1.87629	0.001092		-1.87721	0.00128414		-1.8745	0.00126537		-1.8706	0.00248041		-1.87305	0.000477756		-1.87051	0.00179796		-1.87845	0.00194313		-1.87802	0.00163883		-1.87052	0.00159694		-1.87143	0.00180185		-1.87351	0.00169359
-1.87035	0.00530239		-1.86906	0.00563938		-1.86406	0.00236464		-1.86795	0.00179194		-1.86935	0.00227047		-1.86817	0.000846252		-1.86909	0.00115821		-1.87012	0.000716291		-1.86279	0.0018397		-1.86711	0.000754767		-1.86489	0.000553033		-1.87033	0.00138096		-1.8702	0.00103628		-1.8627	0.00218766		-1.86331	0.00155808		-1.86538	0.00205306
-1.86629	0.00580108		-1.86469	0.00545788		-1.85968	0.0028423		-1.86358	0.00259789		-1.86341	0.00122446		-1.86192	0.00148407		-1.86221	0.00151198		-1.86325	0.000799681		-1.8556	0.00129627		-1.86305	0.00125005		-1.86051	0.00165448		-1.86502	0.00116946		-1.86395	0.00136097		-1.85801	0.00200174		-1.858	0.000807686		-1.85976	0.00170211
-1.8591	0.00602977		-1.86	0.00502553		-1.85468	0.00199216		-1.85608	0.00208828		-1.85935	0.0013143		-1.85817	0.00123743		-1.85815	0.00140735		-1.85512	0.00148608		-1.85185	0.00182571		-1.8568	0.00146242		-1.85426	0.0012205		-1.86064	0.00133539		-1.85989	0.00168834		-1.85364	0.0018911		-1.85456	0.00105145		-1.85569	0.00180088
-1.85191	0.00483446		-1.85187	0.00615239		-1.84718	0.00231625		-1.84858	0.000984166		-1.8531	0.0015203		-1.85317	0.00116259		-1.85284	0.00133008		-1.84981	0.000920976		-1.84716	0.00198734		-1.84867	0.0013329		-1.84614	0.000599247		-1.85377	0.00116836		-1.85395	0.00165087		-1.84583	0.0017126		-1.84831	0.000909012		-1.84944	0.00188567
-1.84691	0.0047032		-1.84437	0.00578674		-1.83968	0.00319192		-1.84358	0.00083076		-1.84497	0.00162905		-1.84567	0.00179594		-1.84471	0.00167759		-1.84575	0.00106783		-1.83998	0.00238313		-1.84211	0.00180167		-1.8402	0.00143793		-1.84564	0.00114867		-1.84583	0.00211694		-1.83833	0.00195897		-1.84081	0.00142216		-1.84101	0.00183148
-1.84254	0.00520598		-1.84031	0.00478155		-1.835	0.00306998		-1.8392	0.00117945		-1.83872	0.00221126		-1.83911	0.0018395		-1.83784	0.00153809		-1.83887	0.00191278		-1.83279	0.00360946		-1.83837	0.000835415		-1.83614	0.00173744		-1.84064	0.00144048		-1.83958	0.00128761		-1.83395	0.00183829		-1.83487	0.000931479		-1.83507	0.0012998
-1.83566	0.00588066		-1.83625	0.00630773		-1.83031	0.00333233		-1.83202	0.00182653		-1.83528	0.00154209		-1.83442	0.0016027		-1.83377	0.0012973		-1.83075	0.00226432		-1.82779	0.00185477		-1.83242	0.000728468		-1.82989	0.00139656		-1.83721	0.0016126		-1.83583	0.000327365		-1.82989	0.00174882		-1.8305	0.00128758		-1.831	0.00160486
-1.82785	0.00530783		-1.82938	0.00617699		-1.82312	0.002989		-1.82389	0.00119994		-1.82997	0.000600511		-1.82942	0.00122269		-1.8294	0.000870225		-1.82544	0.00229031		-1.8231	0.00174866		-1.8243	0.00136051		-1.82176	0.000790267		-1.83096	0.00103052		-1.83052	0.000360815		-1.82302	0.00160043		-1.82487	0.00029881		-1.82476	0.00109307
-1.82191	0.00564908		-1.82188	0.00553855		-1.81531	0.00324069		-1.8192	0.0021857		-1.82216	0.000863865		-1.82192	0.0013183		-1.82221	0.000900088		-1.822	0.00277311		-1.81623	0.0016559		-1.81774	0.00127986		-1.81551	0.00143133		-1.82346	0.00113384		-1.8227	0.00123498		-1.81552	0.00142847		-1.81706	0.000664797		-1.81663	0.00136164
-1.81785	0.00559246		-1.81687	0.00498542		-1.81062	0.00360269		-1.81576	0.00215337		-1.81591	0.00111879		-1.81442	0.00120236		-1.81502	0.000547154		-1.81575	0.0017055		-1.80841	0.00256134		-1.8143	0.000845716		-1.81176	0.00107834		-1.81752	0.00086172		-1.81614	0.000493946		-1.8102	0.00171412		-1.80987	0.00161088		-1.81038	0.00180066
-1.8116	0.00516245		-1.8125	0.00563361		-1.80687	0.00276151		-1.8092	0.00177714		-1.81153	0.0007989		-1.80973	0.00121934		-1.81034	0.00123736		-1.80825	0.00134919		-1.80279	0.00208355		-1.8093	0.00100592		-1.80676	0.00134418		-1.81314	0.00126282		-1.81177	0.000763108		-1.80583	0.00156988		-1.8055	0.00202742		-1.80663	0.00220035
-1.80379	0.00551934		-1.80563	0.00600148		-1.8	0.00281905		-1.80139	0.00178215		-1.80622	0.000723451		-1.80504	0.00189357		-1.80565	0.00115195		-1.80231	0.00183264		-1.79873	0.00239131		-1.80148	0.000644532		-1.79895	0.00238643		-1.80721	0.000878756		-1.80677	0.000872378		-1.79927	0.000910417		-1.8005	0.00158639		-1.80163	0.00143878
-1.79754	0.00492628		-1.79781	0.00635427		-1.7925	0.00311342		-1.79608	0.00164673		-1.79872	0.00122672		-1.79817	0.00186162		-1.79846	0.000677677		-1.79794	0.00192686		-1.79216	0.00274384		-1.79492	0.000280736		-1.79239	0.00151473		-1.7994	0		-1.79927	0.00154361		-1.79145	0.00218657		-1.79269	0.000649968		-1.79382	0.000874983
-1.79348	0.00498239		-1.79188	0.00532558		-1.78718	0.00276628		-1.7917	0.00209807		-1.79153	0.00122035		-1.79035	0.00162816		-1.79065	0.00125386		-1.792	0.0016325		-1.78404	0.00239519		-1.79024	0.00113851		-1.7877	0.00117539		-1.79251	0.000565262		-1.79177	0.00158843		-1.78521	0.00228063		-1.7855	0.00105213		-1.78694	0.000626954
-1.78754	0.00615509		-1.78781	0.00508936		-1.78312	0.00266911		-1.78577	0.00218592		-1.78685	0.00118458		-1.78504	0.00170725		-1.78502	0.000687492		-1.78418	0.00148738		-1.7781	0.00242209		-1.78523	0.00138834		-1.7827	0.00163225		-1.78814	0.001348		-1.78677	0.000636221		-1.78114	0.00199585		-1.78112	0.00155381		-1.78257	0.00105155
-1.77941	0.00686547		-1.78187	0.00611737		-1.77656	0.00297243		-1.77764	0.0018584		-1.78216	0.00127688		-1.78098	0.00164269		-1.78096	0.00103646		-1.77762	0.0012554		-1.77435	0.00211949		-1.77805	0.000934473		-1.7752	0.00142517		-1.78314	0.00156835		-1.78239	0.00104877		-1.77552	0.00127725		-1.77612	0.000650418		-1.77757	0.00106969
-1.77316	0.00640877		-1.77375	0.00710795		-1.76875	0.00367262		-1.77139	0.00165993		-1.77466	0.00173061		-1.77379	0.0015254		-1.7744	0.00144453		-1.77325	0.00192946		-1.7681	0.00265237		-1.77055	0.00083673		-1.76739	0.00139106		-1.77533	0.00115154		-1.7752	0.00115091		-1.76739	0.00104746		-1.76831	0.000804766		-1.76976	0.00224733
-1.76941	0.00569788		-1.76719	0.00720877		-1.7625	0.00327117		-1.76702	0.00139181		-1.76685	0.00124152		-1.76567	0.00163643		-1.76627	0.00116886		-1.76793	0.00246511		-1.75966	0.00167398		-1.76555	0.000974359		-1.76239	0.00122754		-1.76815	0.00169048		-1.76739	0.00136008		-1.76083	0.00177894		-1.76081	0.00159021		-1.76226	0.00281878
-1.7641	0.0057329		-1.76313	0.00635604		-1.75843	0.00242275		-1.7617	0.00204822		-1.76185	0.00131512		-1.76067	0.00184755		-1.76065	0.000787108		-1.76043	0.00196801		-1.75373	0.001448		-1.76117	0.00124655		-1.75802	0.00166218		-1.76345	0.00147787		-1.76208	0.00088219		-1.75676	0.00200763		-1.75675	0.0016129		-1.75757	0.00215293
-1.7566	0.00641557		-1.7575	0.00528348		-1.75281	0.00223089		-1.75358	0.0021857		-1.75747	0.00125489		-1.75692	0.000970465		-1.75659	0.00125678		-1.75325	0.00112025		-1.7506	0.00270618		-1.75398	0.00112601		-1.75114	0.00157591		-1.75877	0.00122101		-1.75802	0.000382		-1.75114	0.00173966		-1.75268	0.00145743		-1.75288	0.00204585
-1.75004	0.0065334		-1.74906	0.00510509		-1.74468	0.00321687		-1.7467	0.00262156		-1.75028	0.00121007		-1.75067	0.000900763		-1.75034	0.00156252		-1.74856	0.000964296		-1.74466	0.00290289		-1.74617	0.00165549		-1.74332	0.00132547		-1.75096	0.00167433		-1.75083	0.00102157		-1.7427	0.00122509		-1.7455	0.000523704		-1.74569	0.00176264
-1.74535	0.00529524		-1.74281	0.00559328		-1.73812	0.00220308		-1.74264	0.00152154		-1.74216	0.00166112		-1.74317	0.00164805		-1.7419	0.00227069		-1.74387	0.00184542		-1.73685	0.00295691		-1.74086	0.000828183		-1.73801	0.00156799		-1.74346	0.000613492		-1.74301	0.00195527		-1.73614	0.00116704		-1.73831	0.000649968		-1.73788	0.00119884
-1.74035	0.00508084		-1.73938	0.00481058		-1.73406	0.00247896		-1.73733	0.000684637		-1.73747	0.00107788		-1.73723	0.00169206		-1.73627	0.00227069		-1.73606	0.00181834		-1.7306	0.00164622		-1.73649	0.000389218		-1.73395	0.00149977		-1.73939	0.00140198		-1.73802	0.00214705		-1.7327	0.00208488		-1.733	0.000558977		-1.73288	0.000957368
-1.73285	0.00516007		-1.73407	0.0055155		-1.72843	0.00294385		-1.7292	0.000266754		-1.73403	0.00156367		-1.73285	0.0016552		-1.73284	0.00130398		-1.72856	0.00107021		-1.72623	0.000992596		-1.72961	0.000662503		-1.72677	0.00141724		-1.73502	0.00111083		-1.73427	0.00136476		-1.7277	0.0029534		-1.72862	0.000987646		-1.72882	0.00178559
-1.72535	0.00525427		-1.72625	0.00753564		-1.72	0.00276342		-1.72201	0.000454756		-1.72747	0.00149028		-1.72692	0.00126647		-1.72721	0.0016519		-1.72418	0.000786036		-1.72091	0.00263559		-1.72148	0.00133092		-1.71864	0.00106491		-1.72814	0.00145442		-1.7277	0.000165466		-1.7202	0.00308237		-1.72206	0.0010519		-1.72163	0.000930926
-1.72035	0.00514341		-1.71969	0.0063587		-1.71343	0.00261004		-1.71826	0.0012409		-1.71966	0.00102628		-1.71911	0.000910816		-1.7194	0.00179537		-1.72012	0.00139533		-1.71341	0.00300942		-1.71649	0.00166776		-1.71364	0.000836262		-1.72064	0.00143428		-1.71989	0.000375756		-1.71333	0.00236355		-1.71394	0.00143901		-1.7135	0.000970916
-1.71598	0.00461445		-1.71531	0.0066736		-1.70968	0.00215316		-1.71389	0.00161031		-1.71435	0.00138584		-1.71254	0.0012763		-1.71315	0.0019875		-1.71325	0.00188874		-1.70623	0.00121944		-1.71274	0.000786983		-1.70989	0.00117319		-1.71564	0.0012949		-1.71427	0.000675915		-1.70864	0.00246175		-1.70831	0.001051		-1.70851	0.00109001
-1.70879	0.00424905		-1.71031	0.00610718		-1.705	0.00273522		-1.70639	0.00192167		-1.70997	0.00138338		-1.70817	0.00144698		-1.70877	0.00216919		-1.70575	0.00106025		-1.70154	0.00197917		-1.70648	0.000799913		-1.70364	0.00089348		-1.71127	0.00102234		-1.70989	0.0015862		-1.70395	0.00150267		-1.70425	0.0017513		-1.70476	0.00140732
-1.70098	0.00433373		-1.70282	0.00598308		-1.6975	0.00288478		-1.69952	0.0011287		-1.70372	0.00201041		-1.70286	0.000862337		-1.70346	0.00165128		-1.70075	0		-1.69685	0.00249397		-1.69898	0.00123165		-1.69614	0.000560515		-1.70471	0.00118915		-1.70395	0.0012013		-1.69645	0.00154457		-1.69831	0.00203236		-1.6985	0.0017303
-1.69598	0.00511807		-1.69531	0.00650895		-1.69031	0.00277752		-1.69451	0.00132102		-1.69591	0.00166749		-1.69504	0.00087172		-1.69565	0.00150237		-1.69637	0.000367784		-1.68935	0.00227595		-1.69305	0.00112777		-1.6902	0.00117385		-1.69658	0.00183848		-1.69583	0.000290124		-1.68864	0.00177741		-1.69018	0.00156797		-1.691	0.000985995
-1.69191	0.0052762		-1.69031	0.00551395		-1.68562	0.00309932		-1.68983	0.00219571		-1.68966	0.00170244		-1.68817	0.00144408		-1.68846	0.00134992		-1.6895	0.00118154		-1.68154	0.00177966		-1.68899	0.000563664		-1.68614	0.000875434		-1.69065	0.00300109		-1.68958	0.00016948		-1.68364	0.00213398		-1.68362	0.00116558		-1.68538	0.00111842
-1.68473	0.00556882		-1.68594	0.0054047		-1.68093	0.00268549		-1.68295	0.00197789		-1.68528	0.00164899		-1.68379	0.0018853		-1.68377	0.000425402		-1.68168	0.00136197		-1.67654	0.00187306		-1.68305	0.000765505		-1.6802	0.00117803		-1.68658	0.001448		-1.6852	0.00101577		-1.67958	0.0019546		-1.67956	0.000971246		-1.68101	0.00170102
-1.6766	0.00527858		-1.67906	0.00542353		-1.67375	0.00223718		-1.67514	0.00168838		-1.67966	0.00202829		-1.67848	0.00224252		-1.67909	0.000983414		-1.67575	0.00127317		-1.67216	0.00183604		-1.67523	0.00116897		-1.67208	0.00151297		-1.68064	0.000826322		-1.67989	0.000836252		-1.67239	0.00224702		-1.67362	0.000457651		-1.67507	0.00123533
-1.6716	0.00518422		-1.67125	0.00552924		-1.66593	0.0026733		-1.66952	0.00203707		-1.67185	0.00173184		-1.67067	0.00179371		-1.67159	0.00124467		-1.67169	0.00210035		-1.66498	0.00218857		-1.66867	0.00100285		-1.66551	0.00186464		-1.67252	0.00123229		-1.67177	0.00130968		-1.66426	0.00254402		-1.6655	0.00105527		-1.66694	0.0010474
-1.66785	0.00520003		-1.66594	0.00659272		-1.66093	0.00188051		-1.66545	0.00179922		-1.66497	0.00121521		-1.66348	0.00183928		-1.66409	0.00177428		-1.66544	0.00128226		-1.65716	0.00226347		-1.6643	0.00136708		-1.66114	0.00125373		-1.66627	0.00169623		-1.66489	0.000890887		-1.65895	0.00264898		-1.65893	0.00124017		-1.66038	0.00143048
-1.6616	0.00531327		-1.66156	0.0056099		-1.65656	0.00196492		-1.65889	0.00203934		-1.6606	0.00144608		-1.65942	0.00104955		-1.65909	0.000839735		-1.65731	0.000607992		-1.65248	0.00189738		-1.65898	0.00234539		-1.65583	0.00123129		-1.6622	0.00153052		-1.66052	0.0011625		-1.65489	0.00223262		-1.6555	0.00132982		-1.65601	0.00224974
-1.65379	0.00543807		-1.65469	0.00502066		-1.65	0.00223413		-1.65077	0.00177418		-1.65528	0.00139982		-1.65504	0.000802465		-1.65471	0.00119267		-1.65137	0.000507923		-1.64841	0.00209452		-1.65117	0.00152619		-1.64801	0.00166042		-1.65627	0.00134778		-1.6552	0.00164084		-1.64801	0.00295035		-1.6505	0.000676704		-1.65069	0.00171303
-1.64816	0.00450189		-1.64656	0.00572403		-1.64187	0.00185822		-1.64514	0.0017471		-1.64716	0.00194709		-1.64786	0.0016505		-1.64721	0.001328		-1.64731	0.000818092		-1.64185	0.0022809		-1.64398	0.00105917		-1.64114	0.000781685		-1.64783	0.00131415		-1.64739	0.00202039		-1.63989	0.00287615		-1.64268	0.00153022		-1.64288	0.00168441
-1.64379	0.00501215		-1.64125	0.00538276		-1.63656	0.00295166		-1.64108	0.00162852		-1.64028	0.00192982		-1.64067	0.00173093		-1.6394	0.00141529		-1.64137	0.00121014		-1.63435	0.00190448		-1.6393	0.0015595		-1.63677	0.000942555		-1.64158	0.0019637		-1.63989	0.00232634		-1.63458	0.00309481		-1.63581	0.000757136		-1.636	0.00166212
-1.63785	0.00559858		-1.63781	0.00517711		-1.6325	0.00308198		-1.63452	0.00152427		-1.63653	0.00198121		-1.63567	0.0022557		-1.63471	0.00130607		-1.63294	0.00159763		-1.62873	0.00175383		-1.63461	0.000805391		-1.63176	0.00131711		-1.63814	0.00178207		-1.63614	0.0015474		-1.63114	0.00291608		-1.63143	0.000403281		-1.63163	0.00190731
-1.63004	0.00540287		-1.63156	0.00582065		-1.62562	0.0029568		-1.62639	0.00116056		-1.63185	0.00200609		-1.63129	0.00111188		-1.63096	0.000924105		-1.62668	0.00136414		-1.62466	0.00173381		-1.6268	0.00133443		-1.62364	0.00185892		-1.63283	0.00199446		-1.63177	0.00112415		-1.6252	0.00337718		-1.62675	0.00120535		-1.62664	0.00164267
-1.62348	0.0056348		-1.62406	0.00524226		-1.6175	0.00258661		-1.62076	0.00212697		-1.62435	0.00215884		-1.62442	0.00157053		-1.6244	0.000914081		-1.62325	0.00148088		-1.61841	0.00145704		-1.6193	0.00182577		-1.61645	0.00106865		-1.62533	0.00128384		-1.62427	0.00123542		-1.61739	0.00219225		-1.61893	0.0013242		-1.61882	0.00176898
-1.6191	0.00529729		-1.61813	0.00445202		-1.61187	0.00237741		-1.61701	0.00134333		-1.61716	0.00182024		-1.61629	0.00170591		-1.61659	0.00109013		-1.61794	0.0010531		-1.61029	0.00200262		-1.61492	0.00132435		-1.61239	0.00182547		-1.61877	0.00145928		-1.61708	0.00142988		-1.61145	0.00140992		-1.61143	0.0015801		-1.61132	0.00117983
-1.61379	0.00653476		-1.61375	0.00460072		-1.60843	0.00230425		-1.61139	0.000993498		-1.61247	0.00162453		-1.61067	0.00293999		-1.61127	0.00178117		-1.61044	0.00109794		-1.60404	0.00166387		-1.61086	0.00124041		-1.60801	0.000988109		-1.61439	0.0015261		-1.61239	0.00101599		-1.60739	0.00303152		-1.60675	0.00141317		-1.60726	0.00117742
-1.60598	0.00655466		-1.60781	0.00573156		-1.6025	0.00204017		-1.60389	0.00142754		-1.60778	0.00154209		-1.6066	0.00185872		-1.60721	0.00202718		-1.60387	0.00124176		-1.59998	0.00124914		-1.60368	0.0010789		-1.60083	0.0006393		-1.60908	0.00135641		-1.6077	0.00102134		-1.60145	0.0030468		-1.60237	0.00170839		-1.60288	0.00192304
-1.5991	0.00580687		-1.6	0.00681986		-1.59468	0.00246124		-1.59764	0.00149059		-1.60091	0.002091		-1.60036	0.00124883		-1.60065	0.00145392		-1.59918	0.00143193		-1.59435	0.00209883		-1.59648	0.000709621		-1.59364	0.000718525		-1.60158	0.00112278		-1.60083	0.00077069		-1.59364	0.00179967		-1.59518	0.00205752		-1.59569	0.00220581
-1.59473	0.00525784		-1.59313	0.00648302		-1.58875	0.00199121		-1.59326	0.00169794		-1.5931	0.00147219		-1.59254	0.00162079		-1.59284	0.0011864		-1.59419	0.00245384		-1.58623	0.00235731		-1.59149	0.00174556		-1.58864	0.00155237		-1.59408	0.000733402		-1.59302	0.000660305		-1.58676	0.00205695		-1.58737	0.00168053		-1.5885	0.00203143
-1.58973	0.00534353		-1.58906	0.00569367		-1.58437	0.00238484		-1.58764	0.00159529		-1.58778	0.00172876		-1.58629	0.000892497		-1.58659	0.00104627		-1.58669	0.00157489		-1.57935	0.00169959		-1.58711	0.000958799		-1.58426	0.000596607		-1.58939	0.00030752		-1.58739	0.00132418		-1.58239	0.00152929		-1.58206	0.000991466		-1.58351	0.00230371
-1.58191	0.0059672		-1.58375	0.00563694		-1.57875	0.0035261		-1.58014	0.00156775		-1.58341	0.00221353		-1.58223	0.00098789		-1.58252	0.00134951		-1.57919	0.00144449		-1.57529	0.00249225		-1.58024	0.00055446		-1.57739	0.000475349		-1.5847	0.00102389		-1.58333	0.00146957		-1.57739	0.00212263		-1.57769	0.00139924		-1.57913	0.0017928
-1.57441	0.00589035		-1.57594	0.00641986		-1.57093	0.00246791		-1.57295	0.00179194		-1.57685	0.00110645		-1.57629	0.00241365		-1.5769	0.00074346		-1.5745	0.00135439		-1.56966	0.0019316		-1.57243	0.000845716		-1.56926	0.000425393		-1.57752	0.00143605		-1.57677	0.00060344		-1.56958	0.00234784		-1.57081	0.00194159		-1.57225	0.00188939
-1.57035	0.00500075		-1.56875	0.00543461		-1.56406	0.00147335		-1.56827	0.00221506		-1.56872	0.00169813		-1.56785	0.00189156		-1.56877	0.000195472		-1.56981	0.00135916		-1.56154	0.00193634		-1.56648	0.000962744		-1.56332	0.00106139		-1.5697	0.00158362		-1.56864	0.00122048		-1.56208	0.00179421		-1.56269	0.00147113		-1.56414	0.00160836
-1.56598	0.00539063		-1.56438	0.00536769		-1.55968	0.00230024		-1.56358	0.00166084		-1.5631	0.00145615		-1.56192	0.00315848		-1.5619	0.000353979		-1.56294	0.00223746		-1.55498	0.00157175		-1.56243	0.00143897		-1.55927	0.00113071		-1.56471	0.00106725		-1.56271	0.00149009		-1.55739	0.00240174		-1.55769	0.000734444		-1.5585	0.00104565
-1.55879	0.00539114		-1.55938	0.00595317		-1.55468	0.00248239		-1.55608	0.00179922		-1.55903	0.000673288		-1.55817	0.00249765		-1.55784	0.00127161		-1.55512	0.00214086		-1.55123	0.001595		-1.55649	0.00141617		-1.55301	0.000931771		-1.56033	0.00151393		-1.55864	0.00190532		-1.5527	0.00251958		-1.55394	0.000685915		-1.55445	0.00120168
-1.5516	0.00528878		-1.55156	0.00610497		-1.54687	0.00228824		-1.54858	0.00147625		-1.55278	0.00172711		-1.55285	0.00107077		-1.55252	0.00214998		-1.54981	0.000575719		-1.54654	0.00143186		-1.54836	0.00190335		-1.54489	0.000922308		-1.55345	0.00155441		-1.55239	0.00127423		-1.5452	0.00318013		-1.54768	0.00140284		-1.54788	0.00104041
-1.54691	0.0053568		-1.54406	0.00578652		-1.53968	0.00221146		-1.54389	0.00117399		-1.54435	0.00169792		-1.54504	0.000998613		-1.54409	0.000965872		-1.54575	0.000935705		-1.53904	0.00276364		-1.54211	0.00105172		-1.53895	0.000879835		-1.54533	0.00127433		-1.54426	0.000247977		-1.5377	0.00218003		-1.54018	0.00130196		-1.53976	0.00123184
-1.54223	0.00527212		-1.54031	0.00589178		-1.535	0.00172066		-1.5392	0.00139249		-1.53872	0.00094322		-1.53848	0.00113712		-1.53752	0.000837855		-1.53856	0.00108884		-1.53185	0.00320183		-1.53805	0.000625466		-1.53489	0.00105501		-1.54033	0.00099402		-1.53833	0.000312201		-1.53333	0.00169623		-1.53425	0.00184341		-1.53382	0.00146916
-1.53535	0.00502082		-1.53594	0.00694108		-1.53031	0.00170256		-1.5317	0.00120289		-1.53528	0.000880928		-1.53442	0.00115388		-1.53377	0.0011981		-1.53043	0.000590664		-1.52748	0.00236506		-1.53211	0.00158624		-1.52864	0.00172336		-1.53658	0.00129313		-1.53458	0.00196263		-1.52926	0.0021246		-1.52987	0.000766122		-1.53007	0.000869083
-1.52723	0.00504785		-1.52875	0.0064797		-1.52281	0.00194834		-1.5242	0.00196469		-1.52935	0.00166873		-1.5291	0.00119119		-1.52909	0.000864795		-1.52543	0.00151359		-1.52279	0.00163202		-1.52368	0.00147776		-1.52051	0.00202947		-1.53033	0.00234025		-1.52927	0.00152153		-1.52239	0.00180425		-1.52393	0.00105954		-1.52351	0.000952997
-1.52191	0.00472768		-1.52156	0.00548337		-1.515	0.00203751		-1.51952	0.000769989		-1.52185	0.00136857		-1.52129	0.00229458		-1.52159	0.00080465		-1.522	0.00182029		-1.5156	0.00169142		-1.51743	0.000965593		-1.51426	0.000892599		-1.52283	0.00221061		-1.52145	0.00087327		-1.51489	0.00271467		-1.51612	0.00184072		-1.51507	0.00114377
-1.51785	0.00586978		-1.51656	0.0059463		-1.51093	0.00155871		-1.51577	0.00140205		-1.5156	0.0010639		-1.5141	0.00266074		-1.51471	0.0011839		-1.51575	0.00170073		-1.50779	0.0017887		-1.51399	0.00249134		-1.51083	0.000964342		-1.51689	0.00159402		-1.5152	0.0010093		-1.50989	0.00282727		-1.50925	0.0013406		-1.50945	0.000792817
-1.51129	0.00574634		-1.51219	0.00563539		-1.50687	0.00175914		-1.50889	0.000908146		-1.51122	0.000383003		-1.50942	0.00218935		-1.51002	0.00150634		-1.50794	0.00129742		-1.50216	0.00219159		-1.50868	0.00179509		-1.5052	0.000176055		-1.51283	0.000951985		-1.51083	0.00150548		-1.50551	0.00287942		-1.50518	0.00148798		-1.50601	0.00156422
-1.50316	0.00601481		-1.50531	0.00498564		-1.5	0.00217373		-1.50139	0.00119766		-1.5056	0.000217508		-1.50473	0.00168603		-1.50502	0.00124342		-1.50231	0.000936788		-1.49779	0.00231599		-1.50118	0.00172233		-1.4977	0.00140558		-1.50689	0.00159645		-1.50552	0.000503981		-1.49864	0.00257348		-1.49987	0.0011867		-1.50038	0.000703221
-1.49723	0.00631492		-1.49719	0.00405048		-1.4925	0.00267749		-1.49608	0.00148194		-1.4981	0.000690146		-1.49754	0.00185492		-1.49784	0.000789196		-1.49793	0.00138623		-1.49123	0.00271134		-1.49462	0.00221806		-1.49114	0.00118771		-1.49877	0.000233848		-1.4977	0.00118859		-1.49082	0.0024168		-1.49206	0.00132892		-1.49257	0.00165775
-1.49316	0.00625422		-1.49156	0.00486398		-1.48718	0.00288174		-1.4917	0.0021684		-1.49122	0.00147486		-1.48973	0.00172512		-1.49002	0.00141425		-1.492	0.00149431		-1.48341	0.00173231		-1.48992	0.00167784		-1.48676	0.000743393		-1.49221	0.000436944		-1.49052	0.00143345		-1.48489	0.00217217		-1.48487	0.00190699		-1.48601	0.00177247
-1.48691	0.00485606		-1.4875	0.00626895		-1.48281	0.00273008		-1.48545	0.00219981		-1.48653	0.00142223		-1.48473	0.00112305		-1.48502	0.00164877		-1.48387	0.00169618		-1.47748	0.00165354		-1.48493	0.00123055		-1.48145	0.000828339		-1.48814	0.00144203		-1.48583	0.00141605		-1.48083	0.00173573		-1.4805	0.00142575		-1.48163	0.00194926
-1.47879	0.00574906		-1.48125	0.0052755		-1.47625	0.0026653		-1.47764	0.00175985		-1.48153	0.00145739		-1.48036	0.00133685		-1.48065	0.000981953		-1.47731	0.00130111		-1.47341	0.0026132		-1.47743	0.00104778		-1.47395	0.00105875		-1.48283	0.0022064		-1.48114	0.00118101		-1.47457	0.00281199		-1.4755	0.00134712		-1.47632	0.00178712
-1.47285	0.00565996		-1.47312	0.00603981		-1.46843	0.00202226		-1.47139	0.00149924		-1.47403	0.00176967		-1.47317	0.00136991		-1.47409	0.00117889		-1.47325	0.00216685		-1.46685	0.0022101		-1.46993	0.00116371		-1.46645	0.000950477		-1.4747	0.00199844		-1.47395	0.000323574		-1.46645	0.00247004		-1.46768	0.00102		-1.46851	0.00124429
-1.46941	0.00547242		-1.46719	0.0077127		-1.4625	0.00266263		-1.46702	0.000848286		-1.46653	0.00131533		-1.46536	0.00109066		-1.46596	0.000708585		-1.46793	0.00193921		-1.45873	0.00101735		-1.46523	0.00158185		-1.46176	0.00157569		-1.46752	0.00137566		-1.46614	0.000120643		-1.45989	0.00211565		-1.46019	0.00095125		-1.46132	0.00116825
-1.46379	0.0059298		-1.46313	0.00726174		-1.45843	0.00234388		-1.46139	0.00222211		-1.46185	0.00109535		-1.46036	0.00112417		-1.46034	0.00105839		-1.46012	0.00185993		-1.4531	0.0024038		-1.46055	0.00189568		-1.45708	0.00202485		-1.46315	0.000717695		-1.46145	0.000357916		-1.45583	0.00256693		-1.45644	0.000933052		-1.45663	0.000991677
-1.45629	0.0052002		-1.45687	0.00473944		-1.45218	0.00164064		-1.45327	0.00209374		-1.45716	0.00180791		-1.45692	0.000833295		-1.45627	0.00154769		-1.45294	0.0023384		-1.44966	0.0023685		-1.45336	0.00230002		-1.44989	0.00184352		-1.45814	0.00163561		-1.45708	0.00150302		-1.4502	0.00275416		-1.45206	0.000619638		-1.45226	0.00136645
-1.44973	0.00473806		-1.44875	0.00491562		-1.44406	0.00234769		-1.4467	0.00171683		-1.44966	0.0018001		-1.45035	0.00106452		-1.44971	0.000907189		-1.44856	0.00237067		-1.44373	0.00280002		-1.44555	0.00252203		-1.44208	0.00134814		-1.45033	0.00185419		-1.44958	0.00135941		-1.44208	0.0022671		-1.44487	0.00111818		-1.44476	0.00205088
-1.44535	0.00582047		-1.4425	0.00553212		-1.43781	0.00215144		-1.44264	0.00263408		-1.44216	0.0018885		-1.44254	0.00121442		-1.44159	0.000480117		-1.44356	0.00244864		-1.43623	0.00202737		-1.44055	0.00110125		-1.43708	0.000663948		-1.44314	0.0021126		-1.44177	0.000613921		-1.43551	0.00254358		-1.43769	0.00147608		-1.43695	0.00199712
-1.44004	0.00549401		-1.43906	0.00551661		-1.43375	0.00198549		-1.43701	0.00231202		-1.43747	0.00217549		-1.43723	0.00077722		-1.43596	0.00118411		-1.43575	0.00133208		-1.43029	0.00177858		-1.43617	0.00108109		-1.4327	0.00102948		-1.43908	0.0013615		-1.43708	0.000113061		-1.43208	0.00249274		-1.43269	0.000958215		-1.43194	0.0024368
-1.43254	0.00500874		-1.43375	0.00621954		-1.42812	0.00234349		-1.42889	0.000582215		-1.43341	0.0017452		-1.43286	0.00095572		-1.43221	0.00154748		-1.42825	0.00146226		-1.42591	0.00126915		-1.42899	0.00191168		-1.42551	0.00152112		-1.4347	0.000777207		-1.43333	0.000770467		-1.42707	0.00254947		-1.42831	0.000749272		-1.42757	0.00166518
-1.42504	0.00577898		-1.42594	0.00550664		-1.41968	0.00247382		-1.42233	0.00193578		-1.42685	0.001318		-1.42661	0.00177338		-1.42659	0.00108115		-1.42418	0.00172716		-1.42029	0.00170906		-1.42117	0.00238462		-1.4177	0.00174361		-1.42752	0.000970127		-1.42676	0.00105279		-1.41926	0.00196137		-1.42112	0.00102944		-1.42038	0.000955838
-1.42035	0.00532755		-1.41938	0.00554763		-1.41312	0.00180506		-1.41858	0.0020901		-1.41903	0.00147692		-1.41879	0.0014309		-1.41877	0.00124133		-1.41981	0.00170506		-1.41248	0.00186596		-1.41618	0.0010309		-1.4127	0.00226121		-1.42033	0.000890039		-1.41895	0.00131972		-1.4127	0.00126699		-1.41331	0.00128106		-1.41257	0.00121829
-1.41598	0.00629179		-1.41531	0.00534331		-1.40968	0.00167131		-1.41358	0.00108067		-1.41372	0.00249703		-1.41254	0.00119476		-1.41284	0.00120123		-1.41262	0.00143453		-1.40529	0.00108471		-1.41242	0.00073066		-1.40926	0.0017238		-1.41533	0.00148229		-1.41364	0.000712264		-1.40802	0.00136301		-1.40768	0.00107437		-1.40789	0.0015546
-1.40848	0.00530868		-1.41	0.0069639		-1.40468	0.00168217		-1.40608	0.00154134		-1.40966	0.00186814		-1.40817	0.00106541		-1.40877	0.00102038		-1.40543	0.000499693		-1.4006	0.0020857		-1.40618	0.000305939		-1.4027	0.00114942		-1.41095	0.00149512		-1.40927	0.000345874		-1.40302	0.00171107		-1.40362	0.000761854		-1.40413	0.000944693
-1.40098	0.00541172		-1.4025	0.00716534		-1.39687	0.00176581		-1.3992	0.0016399		-1.4031	0.00204906		-1.40286	0.000880209		-1.40315	0.00182482		-1.40075	0.000284827		-1.39591	0.00279205		-1.39836	0.00121346		-1.39489	0.00161553		-1.40408	0.00116769		-1.40301	0.000466294		-1.39551	0.0022767		-1.39737	0.000680074		-1.39757	0.000392693
-1.39598	0.00600223		-1.395	0.00650496		-1.39031	0.00136818		-1.39483	0.00207531		-1.39528	0.00132273		-1.39473	0.0010214		-1.39534	0.00147084		-1.39606	0.00131908		-1.38841	0.00287771		-1.39305	0.00162897		-1.38958	0.00154378		-1.39627	0.000659067		-1.3952	0.00128627		-1.38801	0.00220185		-1.38925	0.000917774		-1.38976	0.0014449
-1.3916	0.00580074		-1.39032	0.00558508		-1.38562	0.00161453		-1.39014	0.00132626		-1.38903	0.00106493		-1.38785	0.00110719		-1.38815	0.000483041		-1.38918	0.00148305		-1.3806	0.00157843		-1.38867	0.00131164		-1.3852	0.00109154		-1.39064	0.00129756		-1.38895	0.00200277		-1.38301	0.00240174		-1.38331	0.000740286		-1.38445	0.00156771
-1.38441	0.00547038		-1.38594	0.00469158		-1.38062	0.00165778		-1.38295	0.00102605		-1.38497	0.00113668		-1.38379	0.00189379		-1.38377	0.000870225		-1.38137	0.00136609		-1.37623	0.00154421		-1.38243	0.00157659		-1.37895	0.00103498		-1.38658	0.00143871		-1.38458	0.00128315		-1.37864	0.00270048		-1.37925	0.000693779		-1.38007	0.00132799
-1.3766	0.00496097		-1.37875	0.00582951		-1.37343	0.0017479		-1.37514	0.00161896		-1.37935	0.00089717		-1.37848	0.00101135		-1.37877	0.00156503		-1.37575	0.00115772		-1.37154	0.00212767		-1.37461	0.00135218		-1.37083	0.00141614		-1.38002	0.00125287		-1.37896	0.000801464		-1.37146	0.0017737		-1.373	0.00150214		-1.37382	0.00127751
-1.37191	0.00550166		-1.37094	0.00681011		-1.36593	0.00222537		-1.36983	0.00145349		-1.37122	0.00063875		-1.37067	0.00132143		-1.37127	0.00129312		-1.37169	0.00214108		-1.36373	0.00194731		-1.36805	0.00102981		-1.36458	0.00208977		-1.37189	0.000751102		-1.37083	0.0016618		-1.36364	0.00234238		-1.36487	0.00229679		-1.36569	0.00187431
-1.36816	0.00520326		-1.36563	0.00585012		-1.36093	0.00188242		-1.36545	0.00121359		-1.36466	0.00112002		-1.36348	0.00188351		-1.36346	0.00127641		-1.36543	0.00184585		-1.35623	0.00156853		-1.36398	0.000933816		-1.36051	0.00180148		-1.36595	0.000428316		-1.36395	0.0019711		-1.35833	0.00198843		-1.35862	0.00184791		-1.35945	0.00217456
-1.3616	0.00495774		-1.36156	0.00521057		-1.35656	0.00298538		-1.35889	0.00209192		-1.3606	0.00109474		-1.35973	0.00147379		-1.35877	0.00138751		-1.35731	0.00109967		-1.35185	0.00177535		-1.35867	0.000771861		-1.35489	0.000929571		-1.3619	0.00167919		-1.35989	0.00204982		-1.35395	0.00203731		-1.35487	0.00113346		-1.35538	0.00233802
-1.3541	0.00488326		-1.35438	0.00543151		-1.34968	0.00262852		-1.35076	0.00117809		-1.35497	0.00167119		-1.35536	0.00132635		-1.3544	0.00123715		-1.35137	0.00034959		-1.34779	0.00262418		-1.35055	0.000200526		-1.34708	0.00163357		-1.35595	0.00209733		-1.35458	0.000955111		-1.34708	0.0018049		-1.34956	0.00103954		-1.34976	0.00187584
-1.34879	0.00537193		-1.34625	0.00643604		-1.34187	0.00263329		-1.34514	0.00106815		-1.34685	0.00106657		-1.34786	0.00146821		-1.34659	0.00125929		-1.34762	0.00100242		-1.34091	0.00195506		-1.34368	0.000711374		-1.3402	0.00217758		-1.34751	0.0018241		-1.34645	0.00112727		-1.33927	0.00202574		-1.34206	0.000317008		-1.34163	0.00194227
-1.34441	0.00505006		-1.34125	0.0068254		-1.33656	0.0021503		-1.34108	0.00170613		-1.34028	0.000987832		-1.34098	0.000672668		-1.33909	0.00123026		-1.34137	0.000451608		-1.33373	0.0028747		-1.3393	0.00141026		-1.33583	0.00223238		-1.34127	0.000730748		-1.33927	0.00115826		-1.33395	0.00216824		-1.3355	0.000821166		-1.33476	0.00183213
-1.33816	0.00474078		-1.33781	0.00748888		-1.33218	0.00173514		-1.33451	0.00187092		-1.33653	0.00140928		-1.33598	0.0015493		-1.33471	0.000858738		-1.33294	0.000748781		-1.32841	0.00218578		-1.3343	0.0014874		-1.33051	0.00173656		-1.33783	0.00137455		-1.33552	4.63841e-05		-1.33052	0.00136868		-1.33112	0.00149742		-1.33069	0.00152226
-1.33004	0.00495995		-1.33125	0.00685509		-1.32531	0.00249554		-1.32639	0.00145827		-1.33184	0.00154209		-1.33129	0.00141906		-1.33065	0.00142531		-1.327	0.00145208		-1.32404	0.000932549		-1.32649	0.00109424		-1.3227	0.00160782		-1.33251	0.00135198		-1.33083	5.44122e-05		-1.32427	0.00202793		-1.32581	0.00152034		-1.32538	0.00205066
-1.32379	0.00561983		-1.32344	0.00700047		-1.31718	0.00256984		-1.32077	0.00132785		-1.32435	0.0013476		-1.32442	0.00158594		-1.32377	0.00122149		-1.32356	0.00162709		-1.31748	0.00163352		-1.3193	0.000598291		-1.31551	0.00164854		-1.3247	0.00119203		-1.32333	0.000934373		-1.31677	0.00259181		-1.31831	0.00114559		-1.31726	0.00122834
-1.31941	0.00625711		-1.31813	0.00671282		-1.31218	0.00242409		-1.31733	0.00149605		-1.31716	0.00146849		-1.31661	0.0019177		-1.31659	0.00114923		-1.31793	0.00182636		-1.30935	0.00182507		-1.31523	0.000714442		-1.31145	0.00173458		-1.31845	0.00127654		-1.31646	0.000514016		-1.31082	0.00251456		-1.31081	0.00160481		-1.31038	0.000566641
-1.3141	0.00603862		-1.31375	0.00674784		-1.30843	0.00218821		-1.31139	0.00193032		-1.31278	0.0013476		-1.31098	0.0010357		-1.31127	0.000436887		-1.31043	0.00154478		-1.30341	0.00203189		-1.31086	0.00131558		-1.30708	0.00113952		-1.31408	0.00157986		-1.31145	0.000463841		-1.30677	0.0022468		-1.30612	0.00110313		-1.30663	0.00134154
-1.30598	0.00599339		-1.3075	0.00674097		-1.30218	0.00231644		-1.30358	0.00194899		-1.30778	0.000983103		-1.30692	0.000951029		-1.3069	0.00138229		-1.30387	0.0019444		-1.29935	0.0026145		-1.30336	0.00115231		-1.29958	0.00156095		-1.30876	0.00129512		-1.30677	0.00070825		-1.30083	0.00285978		-1.30175	0.000581219		-1.30194	0.0018837
-1.2991	0.00557716		-1.29938	0.00632901		-1.29468	0.00259556		-1.29764	0.00223736		-1.30059	0.00142634		-1.30036	0.00121867		-1.30034	0.00159322		-1.2995	0.00135374		-1.29341	0.0023091		-1.29649	0.000846154		-1.2927	0.00179268		-1.30126	0.00141703		-1.29958	0.00121758		-1.2927	0.00234369		-1.29456	0.00108448		-1.29444	0.00153188
-1.29504	0.0045534		-1.29312	0.00685509		-1.28906	0.0017702		-1.29327	0.00159028		-1.2931	0.00150323		-1.29254	0.00210826		-1.29252	0.00118661		-1.29419	0.00147244		-1.28529	0.0021593		-1.29149	0.00149529		-1.2877	0.00199779		-1.29376	0.00161415		-1.29177	0.00186406		-1.28583	0.00227212		-1.28675	0.00144912		-1.28757	0.00139093
-1.28973	0.0048819		-1.28875	0.00712324		-1.28468	0.00118547		-1.28795	0.00144188		-1.28778	0.000697753		-1.2866	0.000974486		-1.28627	0.000543186		-1.28668	0.00129374		-1.27873	0.00195226		-1.2868	0.00169538		-1.28301	0.00186024		-1.28908	0.00196105		-1.28645	0.00179426		-1.28176	0.00301319		-1.28144	0.00142171		-1.28257	0.00190359
-1.2816	0.0052558		-1.28344	0.00699714		-1.27875	0.00280229		-1.27983	0.00136245		-1.28341	0.00138255		-1.28254	0.00102676		-1.28221	0.00108386		-1.27918	0.00147287		-1.27466	0.00217329		-1.27992	0.000673899		-1.27614	0.0019168		-1.2847	0.00157101		-1.28208	0.000679037		-1.27645	0.00228324		-1.27737	0.0017322		-1.27788	0.0022174
-1.27473	0.0045517		-1.27531	0.00781752		-1.27093	0.00199197		-1.27295	0.00172184		-1.27685	0.00118417		-1.27598	0.0017917		-1.27627	0.00112354		-1.2745	0.00177871		-1.26904	0.00159715		-1.27211	0.00132216		-1.26833	0.00236244		-1.2772	0.00215707		-1.27552	0.000966261		-1.26864	0.00172416		-1.27018	0.000673559		-1.27101	0.00206639
-1.27098	0.00397496		-1.26844	0.00815192		-1.26437	0.00184831		-1.26858	0.00148945		-1.26872	0.0011412		-1.26785	0.0016686		-1.26815	0.0018031		-1.27012	0.00184997		-1.26091	0.00150181		-1.2668	0.00180101		-1.2627	0.000954659		-1.26939	0.00191924		-1.2677	0.00155008		-1.26145	0.00144528		-1.26206	0.000895757		-1.26319	0.00150478
-1.26629	0.00509784		-1.26406	0.00708645		-1.26	0.00133008		-1.26358	0.0018823		-1.26341	0.00191872		-1.26223	0.00134265		-1.26159	0.00157213		-1.26262	0.00104141		-1.25435	0.00156788		-1.26274	0.000594346		-1.25864	0.00166922		-1.26439	0.00137875		-1.26177	0.00183128		-1.25708	0.00179159		-1.25706	0.00104269		-1.25788	0.00166889
-1.25879	0.00580976		-1.25906	0.00741066		-1.25468	0.00255022		-1.25577	0.00137292		-1.25935	0.00220612		-1.25879	0.00144944		-1.25784	0.00186888		-1.25512	0.000970144		-1.2506	0.00202953		-1.25617	0.000310322		-1.25208	0.00244607		-1.26002	0.000617917		-1.2577	0.00123431		-1.25208	0.00223458		-1.25331	0.00112043		-1.2535	0.00137869
-1.25191	0.00533435		-1.25094	0.00682473		-1.24687	0.0015991		-1.24858	0.00120927		-1.25247	0.00144156		-1.25317	0.00153433		-1.2519	0.00202551		-1.25012	0.00116898		-1.2456	0.00201984		-1.24774	0.000825992		-1.24395	0.00111201		-1.25283	0.000353095		-1.25145	0.00155877		-1.24427	0.00240588		-1.24706	0.00170771		-1.24694	0.00146348
-1.24723	0.00548398		-1.24375	0.00559173		-1.23968	0.000802885		-1.24389	0.00132557		-1.24435	0.00128737		-1.24536	0.00104776		-1.24377	0.00164543		-1.24575	0.00164355		-1.2381	0.00301179		-1.24211	0.00152926		-1.23801	0.000632038		-1.24471	0.00129977		-1.24301	0.000294584		-1.23677	0.0018084		-1.23925	0.00175714		-1.23882	0.00140535
-1.24254	0.00646199		-1.24	0.0069464		-1.23531	0.00220631		-1.2392	0.00258719		-1.23872	0.000827271		-1.23911	0.00112863		-1.23721	0.00173335		-1.23856	0.0012567		-1.23154	0.00229403		-1.23836	0.00213851		-1.23426	0.000496255		-1.24002	0.00183893		-1.23739	0.000857437		-1.2327	0.00147408		-1.23362	0.00200338		-1.23319	0.00175346
-1.23535	0.00531072		-1.23563	0.00776877		-1.23062	0.0026592		-1.2317	0.00236072		-1.23528	0.00103368		-1.23473	0.000938965		-1.23346	0.00172082		-1.23044	0.00196606		-1.22685	0.00189179		-1.2318	0.00126518		-1.22801	0.00118265		-1.23658	0.00111836		-1.23395	0.00121335		-1.22864	0.00132569		-1.22925	0.00200675		-1.22913	0.000980969
-1.22754	0.00510974		-1.22813	0.00695858		-1.2225	0.00185174		-1.22389	0.00132239		-1.22935	0.000349699		-1.22911	0.00151535		-1.22846	0.0014794		-1.22575	0.00136284		-1.22185	0.0029044		-1.22336	0.00070217		-1.21957	0.00147534		-1.23001	0.00154977		-1.22833	0.00185314		-1.22145	0.0023402		-1.223	0.0023597		-1.22257	0.000940978
-1.22223	0.00475336		-1.22125	0.00707515		-1.215	0.00149031		-1.21983	0.00160667		-1.22153	0.00115456		-1.22161	0.00205799		-1.22096	0.00137352		-1.22231	0.000766108		-1.21466	0.0023827		-1.21774	0.000270217		-1.21364	0.00128828		-1.2222	0.00147035		-1.22052	0.00109404		-1.21427	0.00288161		-1.21518	0.00159673		-1.21444	0.00140491
-1.21785	0.00487408		-1.21625	0.00683205		-1.21125	0.00194986		-1.21577	0.00240875		-1.2156	0.00216048		-1.21442	0.00106117		-1.2144	0.00111519		-1.21575	0.00168773		-1.20685	0.00244705		-1.2143	0.00132501		-1.2102	0.00126672		-1.21689	0.00226083		-1.21427	0.000639566		-1.20926	0.00212242		-1.20862	0.000730175		-1.20882	0.0017751
-1.21129	0.00494107		-1.21156	0.00555561		-1.20687	0.00163187		-1.20889	0.0021536		-1.21153	0.00264402		-1.20973	0.00102051		-1.20971	0.000612728		-1.20794	0.00152637		-1.20185	0.00205083		-1.20867	0.0017666		-1.20458	0.00164171		-1.21252	0.00163207		-1.20989	0.0015639		-1.20458	0.00239345		-1.20425	0.000523929		-1.20538	0.00265795
-1.20348	0.00469283		-1.20469	0.00575882		-1.19968	0.00210324		-1.20139	0.00160166		-1.2056	0.00264299		-1.20504	0.00107211		-1.20471	0.00192235		-1.20231	0.00161279		-1.19748	0.00179795		-1.20086	0.00103989		-1.19676	0.00196411		-1.20627	0.00111747		-1.20426	0.00147047		-1.19802	0.00225968		-1.19894	0.00199214		-1.19944	0.0022198
-1.19754	0.00486524		-1.19688	0.00723271		-1.1925	0.00178849		-1.19608	0.00164559		-1.19778	0.000910944		-1.19754	0.000726508		-1.19752	0.00193174		-1.19793	0.00185105		-1.1906	0.00167592		-1.1943	0.00193864		-1.19051	0.00123525		-1.19846	0.00131791		-1.19677	0.00159022		-1.18989	0.00182214		-1.19112	0.00163896		-1.19163	0.00146632
-1.19348	0.00473109		-1.19156	0.00617145		-1.1875	0.00153508		-1.1917	0.00211263		-1.19091	0.00107829		-1.19004	0.00157008		-1.19002	0.000801517		-1.19169	0.000957365		-1.18248	0.00171939		-1.18993	0.00102827		-1.18614	0.00142671		-1.1922	0.00154114		-1.18958	0.0011518		-1.18427	0.00157403		-1.18425	0.00129859		-1.18569	0.000977472
-1.18691	0.00545575		-1.18719	0.00662529		-1.18312	0.00171704		-1.18514	0.00199655		-1.18653	0.00162535		-1.18504	0.00184487		-1.18502	0.00127808		-1.18387	0.000916644		-1.17716	0.00165138		-1.18492	0.000825554		-1.18082	0.00263158		-1.18783	0.00114114		-1.18489	0.00202708		-1.1802	0.00153409		-1.17987	0.000977312		-1.18132	0.00140251
-1.17879	0.00580091		-1.18063	0.00502886		-1.17625	0.00204036		-1.17702	0.00113848		-1.18153	0.00158834		-1.18067	0.00207162		-1.18034	0.00138334		-1.17762	0.0016011		-1.1731	0.00118005		-1.17711	0.00134473		-1.17301	0.00154532		-1.18221	0.000574554		-1.17989	0.00195371		-1.17395	0.00191292		-1.17456	0.00161313		-1.17569	0.0017445
-1.17316	0.00474027		-1.17281	0.0054437		-1.16812	0.00230787		-1.17139	0.00110047		-1.17372	0.0016087		-1.17317	0.00211384		-1.17346	0.000859783		-1.17325	0.00101043		-1.16623	0.00142131		-1.16992	0.00162853		-1.16583	0.000678912		-1.1744	0.000939375		-1.1727	0.00160627		-1.16583	0.00242029		-1.16643	0.000970347		-1.16788	0.000934422
-1.16973	0.00497814		-1.16688	0.00649787		-1.1625	0.00227052		-1.16733	0.00278976		-1.16653	0.00171396		-1.16535	0.00149636		-1.16565	0.00135828		-1.16794	0.000812677		-1.1581	0.00151171		-1.16524	0.00161166		-1.16145	0.00180963		-1.16751	0.000726323		-1.1652	0.00126151		-1.15958	0.00187037		-1.15925	0.000259493		-1.16069	0.000990147
-1.1641	0.00498936		-1.1625	0.00585677		-1.15843	0.00185403		-1.16139	0.00234729		-1.16185	0.00201246		-1.16067	0.000942093		-1.16002	0.00188872		-1.15981	0.000503591		-1.15279	0.0025736		-1.16055	0.00197085		-1.15645	0.00118595		-1.16314	0.000620571		-1.16052	0.00207792		-1.15551	0.00255166		-1.1555	0.000742756		-1.15632	0.000737311
-1.15629	0.00542362		-1.15625	0.00633012		-1.15218	0.000847088		-1.15327	0.00108909		-1.15716	0.00152728		-1.15692	0.000924444		-1.15596	0.00101432		-1.15294	0.000825673		-1.14935	0.00207322		-1.15305	0.00157243		-1.14895	0.00113313		-1.15783	0.000872782		-1.15583	0.00121089		-1.14958	0.00225531		-1.15112	0.000940915		-1.15132	0.000478356
-1.15004	0.00472547		-1.14813	0.00559771		-1.14406	0.00119918		-1.1467	0.00169521		-1.14966	0.00145698		-1.15035	0.0011751		-1.14909	0.00192214		-1.14887	0.000967762		-1.1431	0.00163804		-1.14555	0.00241837		-1.14145	0.00151583		-1.14971	0.00174844		-1.14833	0.00169837		-1.14114	0.00191882		-1.14362	0.000950351		-1.14382	0.00166911
-1.14566	0.00495978		-1.14219	0.00541489		-1.13812	0.00133084		-1.14264	0.00168997		-1.14185	0.00108261		-1.14285	0.000953486		-1.14096	0.00168281		-1.14356	0.00126818		-1.1356	0.00181775		-1.14055	0.00187267		-1.13645	0.00137125		-1.14283	0.00115862		-1.14052	0.00108111		-1.13489	0.0021414		-1.13644	0.00148461		-1.13632	0.00157864
-1.14035	0.00503935		-1.13875	0.00616103		-1.13406	0.0021402		-1.13702	0.00237961		-1.13747	0.00118355		-1.13754	0.00221683		-1.13565	0.00110454		-1.13543	0.00124869		-1.12966	0.00135761		-1.13617	0.00184725		-1.13208	0.00221719		-1.13877	0.00175707		-1.13614	0.00191736		-1.13145	0.0024731		-1.13175	0.00140531		-1.13163	0.00100676
-1.13254	0.00647678		-1.13312	0.00602918		-1.12781	0.00168827		-1.12858	0.00265638		-1.13341	0.00182477		-1.13317	0.00210848		-1.13221	0.00105672		-1.12825	0.00149128		-1.1256	0.00197809		-1.12898	0.00181657		-1.12458	0.00132812		-1.13439	0.00167919		-1.13239	0.0013525		-1.12614	0.00236551		-1.12706	0.00103348		-1.12694	0.000999981
-1.12566	0.00605681		-1.12562	0.00543328		-1.11937	0.00178868		-1.12202	0.00165697		-1.12653	0.00179002		-1.12692	0.00161789		-1.12596	0.00152535		-1.1245	0.00151532		-1.11966	0.00204545		-1.12086	0.00177186		-1.11708	0.0014573		-1.12721	0.00208826		-1.12551	0.000961356		-1.11864	0.0023917		-1.12019	0.00129252		-1.11944	0.00120714
-1.12098	0.00467243		-1.11906	0.00597089		-1.11343	0.00125844		-1.11858	0.00173026		-1.11903	0.00165536		-1.11879	0.00105178		-1.11846	0.00146499		-1.12012	0.00131432		-1.11154	0.00194925		-1.11617	0.000653298		-1.11239	0.0013268		-1.12002	0.00125331		-1.11801	0.00134023		-1.11208	0.00273998		-1.11206	0.000606383		-1.11163	0.00137738
-1.11598	0.00437283		-1.11469	0.00545766		-1.10968	0.00160996		-1.11358	0.00181424		-1.11403	0.00148761		-1.11254	0.00149971		-1.11252	0.00159218		-1.11262	0.00200072		-1.10498	0.00143724		-1.11242	0.000558843		-1.10833	0.00083318		-1.11502	0.00152322		-1.1127	0.0022862		-1.1077	0.00304331		-1.10675	0.00160324		-1.10726	0.00128013
-1.10848	0.00533996		-1.10937	0.00571605		-1.10468	0.00172085		-1.10577	0.0027843		-1.10966	0.00168497		-1.10848	0.00151914		-1.10815	0.000676006		-1.10544	0.00145099		-1.1006	0.00230157		-1.10586	0.00064782		-1.10177	0.00149207		-1.11033	0.0016761		-1.10833	0.00211694		-1.1027	0.00218919		-1.10268	0.00253315		-1.1035	0.00173882
-1.10098	0.00573137		-1.10156	0.00500116		-1.09687	0.00156671		-1.0992	0.0030317		-1.1031	0.00152975		-1.10285	0.00119968		-1.10252	2.77756e-05		-1.10075	0.00230461		-1.0956	0.00158746		-1.09836	0.000429761		-1.09427	0.00120202		-1.10346	0.00154468		-1.10177	0.0016783		-1.09489	0.00173616		-1.09612	0.0019899		-1.09663	0.00163196
-1.09629	0.00557205		-1.09437	0.00545013		-1.09031	0.00188223		-1.09483	0.00269576		-1.09528	0.00145903		-1.09473	0.00128167		-1.0944	0.000755991		-1.09606	0.00250648		-1.08779	0.00187457		-1.09305	0.00130309		-1.08895	0.000436617		-1.09564	0.00165729		-1.09364	0.00201057		-1.08739	0.00199672		-1.088	0.000951475		-1.08913	0.00238217
-1.09191	0.00509886		-1.09	0.00545013		-1.08562	0.00150593		-1.08983	0.00218342		-1.08935	0.00112085		-1.08817	0.00107479		-1.08784	0.00177679		-1.08918	0.00130111		-1.08029	0.00241219		-1.08867	0.00166974		-1.08458	0.00107834		-1.09033	0.000945127		-1.08739	0.00149299		-1.08271	0.00365214		-1.08206	0.00172097		-1.08382	0.00206836
-1.08441	0.00547412		-1.08531	0.00620513		-1.08062	0.00126815		-1.08264	0.00192076		-1.08528	0.00109988		-1.0841	0.00103637		-1.08346	0.00119559		-1.08106	0.00114775		-1.0756	0.00283402		-1.08242	0.00177055		-1.07833	0.00129577		-1.08627	0.00147588		-1.08333	0.00121		-1.07833	0.0030815		-1.078	0.00128533		-1.07945	0.00181465
-1.0766	0.00550897		-1.0775	0.00608502		-1.07312	0.00174181		-1.07483	0.00202387		-1.07903	0.00118643		-1.07848	0.000709753		-1.07846	0.000436261		-1.07575	0.000740117		-1.07091	0.00270037		-1.0743	0.00101359		-1.0702	0.000645462		-1.07971	0.0010688		-1.0777	0.00160917		-1.07083	0.00257086		-1.07175	0.00134262		-1.07288	0.00190687
-1.07191	0.00519935		-1.07	0.00588004		-1.06562	0.00173285		-1.06983	0.00241398		-1.07091	0.00141586		-1.07036	0.00164179		-1.07065	7.18401e-05		-1.07169	0.00118198		-1.06341	0.00241843		-1.06805	0.00140697		-1.06395	0.000301934		-1.07127	0.000819907		-1.06958	0.000890887		-1.06301	0.00161265		-1.06331	0.0011229		-1.06507	0.000869301
-1.06816	0.00584648		-1.06531	0.00573046		-1.06093	0.00244886		-1.06545	0.00234343		-1.06466	0.00198204		-1.06348	0.00181292		-1.06315	0.000872313		-1.06512	0.0012227		-1.05591	0.00200628		-1.06399	0.00125882		-1.05989	0.000846825		-1.06565	0.00125464		-1.06301	0.00173784		-1.05802	0.00161767		-1.05737	0.00087666		-1.05882	0.000473548
-1.06129	0.00550795		-1.06094	0.0066295		-1.05656	0.00256317		-1.05858	0.000962544		-1.0606	0.00194606		-1.05973	0.00182498		-1.05877	0.00199983		-1.057	0.00106545		-1.05154	0.0020659		-1.05836	0.00129761		-1.05395	0.00144805		-1.06158	0.00079557		-1.05896	0.00172		-1.05395	0.00206982		-1.05394	0.00193935		-1.05476	0.00103757
-1.05379	0.00572457		-1.05344	0.00602186		-1.04937	0.00161682		-1.05045	0.00122292		-1.05497	0.00195141		-1.05504	0.00186832		-1.05409	0.00204097		-1.05137	0.00110227		-1.04748	0.00214166		-1.05055	0.00194828		-1.04614	0.00173964		-1.05533	0.000937162		-1.05333	0.000798565		-1.04645	0.00282923		-1.04831	0.00242171		-1.04882	0.00108411
-1.04879	0.00616444		-1.04563	0.00643848		-1.04156	0.00202779		-1.04514	0.00115806		-1.04685	0.00170779		-1.04754	0.00111121		-1.04627	0.00166694		-1.04731	0.00114104		-1.0406	0.00235752		-1.04367	0.00174578		-1.03927	0.00168001		-1.04689	0.00225507		-1.04489	0.00117209		-1.03833	0.00208292		-1.04081	0.0013761		-1.0407	0.00110291
-1.04441	0.00542107		-1.04094	0.0066049		-1.03625	0.00218555		-1.04108	0.00112369		-1.04028	0.00182908		-1.04067	0.00120414		-1.03877	0.00194887		-1.04075	0.0012292		-1.0331	0.00318225		-1.03961	0.00063993		-1.0352	0.00185958		-1.04127	0.00228782		-1.03833	0.00148741		-1.03364	0.00150791		-1.03425	0.00119254		-1.03444	0.00115732
-1.03785	0.00461683		-1.03719	0.0058386		-1.03218	0.00230787		-1.0342	0.00159825		-1.03653	0.00112434		-1.03598	0.00151736		-1.0344	0.0017818		-1.03262	0.00148348		-1.0281	0.00292355		-1.0343	0.000742275		-1.02958	0.00124691		-1.03783	0.00195065		-1.03458	0.00111411		-1.0302	0.00212984		-1.02987	0.00146866		-1.03007	0.00182623
-1.03004	0.00528198		-1.03031	0.00633765		-1.025	0.00181135		-1.02577	0.00206279		-1.03153	0.00134061		-1.03129	0.00179281		-1.03034	0.000693339		-1.027	0.000984223		-1.02373	0.0019867		-1.02617	0.00106618		-1.02145	0.00150659		-1.03189	0.0012938		-1.02958	0.000414781		-1.02364	0.0017198		-1.02456	0.00149383		-1.02445	0.00126134
-1.02379	0.00464675		-1.02281	0.00775104		-1.01718	0.00271693		-1.02077	0.00202023		-1.02403	0.00162638		-1.02411	0.00191055		-1.02315	0.000560728		-1.02356	0.00163099		-1.01685	0.0013363		-1.01898	0.00115779		-1.01489	0.00223876		-1.02439	0.000688934		-1.02208	0.000875278		-1.01583	0.00206764		-1.01706	0.00126781		-1.01632	0.00138699
-1.01941	0.00583577		-1.0175	0.00616879		-1.01218	0.00293565		-1.01702	0.001334		-1.01716	0.00137865		-1.01629	0.00155489		-1.01596	0.000891735		-1.01793	0.0012253		-1.00904	0.00208613		-1.01524	0.000940609		-1.01114	0.00150857		-1.01815	0.000989153		-1.0152	0.0014553		-1.01052	0.00275613		-1.00987	0.00111773		-1.00975	0.00159809
-1.01379	0.0050669		-1.01313	0.00517822		-1.00843	0.00246276		-1.01076	0.00164559		-1.01278	0.00221414		-1.01098	0.00125664		-1.01096	0.00154623		-1.01012	0.00190607		-1.0031	0.00153194		-1.01086	0.000751918		-1.00645	0.00137169		-1.01377	0.00118274		-1.01052	0.000728097		-1.00614	0.00224004		-1.00518	0.00022422		-1.00601	0.00163808
-1.00598	0.00424769		-1.00688	0.00513678		-1.00218	0.00270035		-1.00326	0.00191348		-1.00778	0.00160191		-1.00692	0.000896741		-1.00659	0.00126848		-1.00387	0.00220735		-0.999038	0.00186617		-1.00336	0.00104252		-0.998952	0.00225945		-1.00814	0.000876543		-1.00583	0.000296145		-1.0002	0.00249754		-1.0005	0.00108358		-1.00132	0.00175324
-0.999101	0.0049965		-0.998752	0.00561655		-0.994371	0.00308408		-0.997329	0.000947522		-1.00028	0.00133774		-1.00004	0.00191591		-0.999711	0.00165629		-0.999497	0.000780621		-0.9931	0.00174716		-0.996172	0.000571554		-0.991765	0.00183934		-1.00064	0.000419909		-0.998328	0.00111567		-0.992076	0.00277904		-0.992996	0.00182431		-0.993823	0.00187169
-0.995039	0.00544385		-0.9925	0.00554386		-0.988746	0.00191366		-0.993266	0.0013233		-0.992783	0.00171766		-0.991919	0.00233747		-0.991898	0.00186471		-0.993871	0.00148153		-0.984977	0.00138042		-0.991487	0.000955731		-0.987389	0.00082988		-0.993457	0.00130088		-0.990516	0.00113373		-0.985515	0.00182956		-0.985496	0.00179938		-0.986628	0.00108827
-0.989727	0.00596176		-0.988437	0.00485313		-0.98437	0.00217278		-0.987327	0.00132603		-0.987784	0.00132108		-0.986605	0.00134869		-0.986273	0.000904683		-0.986058	0.00168838		-0.978414	0.00289859		-0.986803	0.00118738		-0.982388	0.000680233		-0.989077	0.00110132		-0.985515	0.000966707		-0.981448	0.00243905		-0.980499	0.00153045		-0.982257	0.000868209
-0.981601	0.00494192		-0.982814	0.0045728		-0.978433	0.00190719		-0.979514	0.00110662		-0.983409	0.00176617		-0.982542	0.00140498		-0.981898	0.000965872		-0.978871	0.00168167		-0.974351	0.0030882		-0.979608	0.000527066		-0.975201	0.000758797		-0.98408	0.00159026		-0.981139	0.000628862		-0.976138	0.00237642		-0.976123	0.00150528		-0.977259	0.00134198
-0.974726	0.00542549		-0.974689	0.00537722		-0.970309	0.00124434		-0.97264	0.00216567		-0.976533	0.0017452		-0.975668	0.000992582		-0.97596	0.000780216		-0.974496	0.00172759		-0.968413	0.00265668		-0.971796	0.000693184		-0.967389	0.00111179		-0.97658	0.00181924		-0.974578	0.00133198		-0.968013	0.00222978		-0.968623	0.00136981		-0.970072	0.00233518
-0.970977	0.00593524		-0.968127	0.00499562		-0.964058	0.00223604		-0.968577	0.00286897		-0.968409	0.00178283		-0.967543	0.00091305		-0.967837	0.00144432		-0.969499	0.00181748		-0.960288	0.0026287		-0.966486	0.000532106		-0.962075	0.000746253		-0.969081	0.000996233		-0.966453	0.00135428		-0.961139	0.00127834		-0.960811	0.00191576		-0.96226	0.00163196
-0.966289	0.00504751		-0.963752	0.0062694		-0.959684	0.00245248		-0.963267	0.00149127		-0.963095	0.00158279		-0.962229	0.0011722		-0.961274	0.00107196		-0.961999	0.000963646		-0.954038	0.00312737		-0.962427	0.000530353		-0.957703	0.0003849		-0.964083	0.000745792		-0.96083	0.00157372		-0.956767	0.00223087		-0.956436	0.00157875		-0.957255	0.000950156
-0.958789	0.0055559		-0.958438	0.0066951		-0.954371	0.00193081		-0.955455	0.00187433		-0.959033	0.001988		-0.958792	0.00111367		-0.957524	0.00128414		-0.954499	0.000393343		-0.950288	0.00243974		-0.955858	0.00131098		-0.951138	0.000867291		-0.959704	0.0020272		-0.95708	0.000863458		-0.951762	0.00241047		-0.952686	0.00148911		-0.952883	0.00106182
-0.951914	0.00522417		-0.950313	0.00538364		-0.946558	0.00202836		-0.948264	0.00217067		-0.952159	0.00194051		-0.952856	0.000203744		-0.951586	0.00130941		-0.949811	0.00155171		-0.945289	0.00287556		-0.94774	0.000921324		-0.943326	0.000939694		-0.952205	0.00208915		-0.950202	0.00188324		-0.943637	0.00211369		-0.945808	0.00193732		-0.946009	0.0014991
-0.947226	0.00528351		-0.943439	0.00626917		-0.93937	0.00214763		-0.94358	0.00168064		-0.944033	0.00221106		-0.945044	0.00103391		-0.943148	0.00119873		-0.945436	0.00181336		-0.937476	0.00256456		-0.94211	0.000808898		-0.93739	0.000547091		-0.944392	0.00184645		-0.942077	0.00094686		-0.93645	0.00212001		-0.938308	0.000678052		-0.937884	0.00190512
-0.942539	0.00538791		-0.939689	0.00662928		-0.934996	0.00139257		-0.938891	0.00108249		-0.938721	0.00196847		-0.939104	0.00104955		-0.936898	0.00107844		-0.937936	0.00190108		-0.930913	0.0016262		-0.938051	0.00108043		-0.933327	0.00130523		-0.94002	0.00143937		-0.936454	0.00129296		-0.932391	0.00218723		-0.932998	0.000658281		-0.932566	0.00193331
-0.935351	0.00477818		-0.935001	0.00511728		-0.929996	0.00142496		-0.931079	0.000790474		-0.935284	0.00183217		-0.934729	0		-0.933461	0.00157693		-0.930123	0.00154651		-0.926539	0.00194903		-0.93149	0.00165352		-0.926762	0.00146302		-0.935954	0.00141437		-0.933017	0.001687		-0.928012	0.00155286		-0.928623	0.00130802		-0.928195	0.00224012
-0.927539	0.00496828		-0.927501	0.00509689		-0.922183	0.00162558		-0.923579	0.000979841		-0.929034	0.00134246		-0.929106	0.000572583		-0.928149	0.00172896		-0.925748	0.00119974		-0.921538	0.00201382		-0.923052	0.000451458		-0.918641	0.0021877		-0.929393	0.00135486		-0.927077	0.00116339		-0.920825	0.00184898		-0.922061	0.00146305		-0.921633	0.0017032
-0.922227	0.00458877		-0.920627	0.00552636		-0.914995	0.00158195		-0.919517	0.00161145		-0.921221	0.000715433		-0.921293	0.00154081		-0.920649	0.00132528		-0.921998	0.000778671		-0.914039	0.00185219		-0.917421	0.000968223		-0.913014	0.00100549		-0.92158	0.000977428		-0.919578	0.000676584		-0.913638	0.00173704		-0.914249	0.00140441		-0.913508	0.00192916
-0.918164	0.00400846		-0.915939	0.0057453		-0.910933	0.00115441		-0.915454	0.00134515		-0.915597	0.0010933		-0.914106	0.00126067		-0.914086	0.00138501		-0.915124	0.000525251		-0.906539	0.00146005		-0.913988	0.00170677		-0.909577	0.000801271		-0.91627	0.00140176		-0.913642	0.000421025		-0.908954	0.00162465		-0.907996	0.00131589		-0.907885	0.00184918
-0.911289	0.0038624		-0.91125	0.0051401		-0.906558	0.00178601		-0.908267	0.00203161		-0.911221	0.0017746		-0.909731	0.00152585		-0.9094	0.00127725		-0.907624	0.00107563		-0.901851	0.00210658		-0.908365	0.00273307		-0.903638	0.00102354		-0.912204	0.00115951		-0.908954	0.000186875		-0.904262	0.000923729		-0.903621	0.00112717		-0.904444	0.00148271
-0.903164	0.00461036		-0.904063	0.00461424		-0.899059	0.0026693		-0.901076	0.00187775		-0.905284	0.00223491		-0.905043	0.00169608		-0.904398	0.000701484		-0.90231	0.00120255		-0.897164	0.00259792		-0.900553	0.00166009		-0.895825	0.00185936		-0.905642	0.00187366		-0.903327	0.00118971		-0.897388	0.00212743		-0.897998	0.00192205		-0.898509	0.00133061
-0.897852	0.00543535		-0.896251	0.00542486		-0.892184	0.00204075		-0.896079	0.000952984		-0.897471	0.00208915		-0.89723	0.00183973		-0.896899	0.00031618		-0.897935	0.00113389		-0.890288	0.00192966		-0.894609	0.00161451		-0.889889	0.00168309		-0.89783	0.00125995		-0.895515	0.00179828		-0.889575	0.00209536		-0.890186	0.00194249		-0.890696	0.00105155
-0.893789	0.00463009		-0.890937	0.00548603		-0.887183	0.0017159		-0.891704	0.00147511		-0.890908	0.00193948		-0.889731	0.00107077		-0.889399	0		-0.891374	0.00165828		-0.882163	0.00199272		-0.890238	0.00119877		-0.885514	0.000997352		-0.891581	0.00195972		-0.888641	0.00124278		-0.883952	0.00276551		-0.883308	0.00184925		-0.884753	0.00107384
-0.886914	0.00466256		-0.886562	0.0053688		-0.882808	0.00141962		-0.88483	0.00134173		-0.886532	0.00136487		-0.885355	0.00133551		-0.884711	0.00126012		-0.883561	0.00196606		-0.876851	0.00243586		-0.884615	0.00125312		-0.8802	0.000782125		-0.887515	0.00150619		-0.884265	0.000675915		-0.879886	0.00223414		-0.878936	0.00141654		-0.880694	0.000723107
-0.878789	0.00369696		-0.88	0.00613422		-0.875933	0.00187079		-0.876704	0.00140501		-0.88122	0.000876406		-0.880667	0.00124838		-0.880024	0.00192652		-0.877309	0.00129353		-0.872788	0.00337229		-0.876802	0.000928118		-0.872388	0.000672971		-0.881892	0.00107698		-0.879268	0.00111634		-0.873325	0.00175995		-0.873622	0.000174568		-0.874758	0.0014272
-0.873477	0.00415162		-0.871875	0.0052314		-0.867809	0.00233568		-0.871078	0.00139477		-0.873721	0.00147836		-0.873167	0.000920869		-0.873148	0.00122922		-0.873246	0.00120299		-0.865602	0.00282972		-0.869615	0.00119351		-0.865201	0.000984808		-0.873767	0.00172477		-0.871455	0.00131459		-0.865199	0.00182236		-0.865497	0.00102674		-0.866946	0.0022233
-0.869727	0.00478175		-0.866252	0.005414		-0.862496	0.00247744		-0.867015	0.00129166		-0.866534	0.000947126		-0.865355	0.000847146		-0.865336	0.00225878		-0.867311	0.00146204		-0.857789	0.00151752		-0.865236	0.0010252		-0.860825	0.00183868		-0.867205	0.00171039		-0.864265	0.0012575		-0.859264	0.00189372		-0.858623	0.00163155		-0.860072	0.000775553
-0.864101	0.0045143		-0.86219	0.00537943		-0.858433	0.00240999		-0.861079	0.000804585		-0.861846	0.0016381		-0.860979	0.00107122		-0.860024	0.00178451		-0.859498	0.00105029		-0.852475	0.00072271		-0.860552	0.000894806		-0.855828	0.00138423		-0.863139	0.00126681		-0.85958	0.00157862		-0.855518	0.00307146		-0.854873	0.00174703		-0.855693	0.000461311
-0.856289	0.00451617		-0.855624	0.00542398		-0.851871	0.00269959		-0.852954	0.00121655		-0.857159	0.0017929		-0.857229	0.00152004		-0.855649	0.00138919		-0.852937	0.00142197		-0.849038	0.00176308		-0.852739	0.00160815		-0.848015	0.000951578		-0.857516	0.00109468		-0.854892	0.00230114		-0.849262	0.0026767		-0.850185	0.00118154		-0.850695	0.00209721
-0.850351	0.0043895		-0.847499	0.00524957		-0.843745	0.00230291		-0.846389	0.00186796		-0.849347	0.00183669		-0.850355	0.0021621		-0.848774	0.00195555		-0.848874	0.000890219		-0.842788	0.00287556		-0.845552	0.000878589		-0.840516	0.00161332		-0.849391	0.00101415		-0.847079	0.001115		-0.840823	0.00241461		-0.842685	0.000781849		-0.842883	0.00258299
-0.845977	0.00406712		-0.841876	0.00602364		-0.837808	0.00212896		-0.842326	0.00176144		-0.841845	0.00175384		-0.842856	0.00143581		-0.840649	0.00182607		-0.843247	0.00135807		-0.834975	0.00256908		-0.84086	0.000330923		-0.835828	0.00147292		-0.84283	0.00167565		-0.83958	0.00144861		-0.834888	0.0021785		-0.835498	0.00127747		-0.835383	0.00165709
-0.840352	0.00357488		-0.838126	0.006491		-0.834058	0.0018927		-0.83639	0.00141229		-0.837783	0.0012		-0.837542	0.00105044		-0.835648	0.00144327		-0.835122	0.00115664		-0.829351	0.00243005		-0.836176	0.00173789		-0.831452	0.00251121		-0.839083	0.00156459		-0.835204	0.000729212		-0.831455	0.00267648		-0.83081	0.00153831		-0.831004	0.00190512
-0.832539	0.00362045		-0.8325	0.00712789		-0.827809	0.00238122		-0.828265	0.00171728		-0.833722	0.00147301		-0.833166	0.000876412		-0.831898	0.00152305		-0.828561	0.00177372		-0.824977	0.00280238		-0.828676	0.00153693		-0.82364	0.00223986		-0.834391	0.000997781		-0.831142	0.00105992		-0.825824	0.00245498		-0.825809	0.0023597		-0.826319	0.00268963
-0.825351	0.00395371		-0.824687	0.00598308		-0.819371	0.00233702		-0.822017	0.00147534		-0.826533	0.00238252		-0.826605	0.0004687		-0.825648	0.00124592		-0.824811	0.00111202		-0.819039	0.00157886		-0.820863	0.00163489		-0.81614	0.00169585		-0.826892	0.00103119		-0.824268	0.00093638		-0.818012	0.00107168		-0.818622	0.00167581		-0.818507	0.000969387
-0.820976	0.00401696		-0.818752	0.00547362		-0.813746	0.00203503		-0.81858	0.00171182		-0.819033	0.00148514		-0.818792	0.000671327		-0.818148	0.00158967		-0.820123	0.00153503		-0.811227	0.00207774		-0.816484	0.00153101		-0.811764	0.00220641		-0.819705	0.000867694		-0.816768	0.00149321		-0.811763	0.0012467		-0.811122	0.00152798		-0.811007	0.00140579
-0.815977	0.00435651		-0.814376	0.00572913		-0.809996	0.00123443		-0.813266	0.000927493		-0.814345	0.00176227		-0.812857	0.00200505		-0.812523	0.00131505		-0.812623	0.001365		-0.804664	0.00153624		-0.812738	0.000986851		-0.807702	0.00100968		-0.81502	0.00148627		-0.811767	0.00161296		-0.807391	0.00181582		-0.805808	0.00158684		-0.806628	0.00275803
-0.808476	0.00405199		-0.808749	0.00522963		-0.804371	0.00165321		-0.805453	0.00115692		-0.809971	0.00161918		-0.808794	0.00191122		-0.808148	0.00153579		-0.805749	0.00149929		-0.800288	0.00273739		-0.805864	0.00107123		-0.800828	0.00164149		-0.810328	0.00196193		-0.807391	0.0011877		-0.802074	0.0016827		-0.801433	0.00214941		-0.802569	0.00112607
-0.800977	0.00420501		-0.800937	0.00450366		-0.79687	0.00200321		-0.798892	0.00235526		-0.803095	0.00157704		-0.802855	0.00119498		-0.80221	0.00112041		-0.801061	0.00163987		-0.794976	0.00249354		-0.798364	0.00127394		-0.793328	0.00181469		-0.803141	0.00207742		-0.800517	0.00167429		-0.794574	0.00164451		-0.794872	0.00158212		-0.795695	0.00136601
-0.796289	0.00410929		-0.79375	0.00540337		-0.790621	0.00272474		-0.794517	0.00235048		-0.79497	0.00190207		-0.794729	0.00156628		-0.794398	0.000206749		-0.796372	0.000676437		-0.787164	0.00180871		-0.793047	0.00145957		-0.788014	0.00160166		-0.795642	0.00209822		-0.792705	0.00166091		-0.787387	0.00200654		-0.786746	0.00136891		-0.788195	0.000644218
-0.791602	0.00430176		-0.789375	0.00491761		-0.786246	0.00199197		-0.789515	0.00184725		-0.789345	0.00190864		-0.788168	0.00205308		-0.787837	0.00100054		-0.789186	0.00158853		-0.779977	0.00155992		-0.788988	0.000406092		-0.783951	0.00146148		-0.790332	0.00215331		-0.786765	0.00161854		-0.782703	0.00085237		-0.781123	0.00139699		-0.78319	0.00189791
-0.784101	0.00390593		-0.78469	0.00454798		-0.780934	0.00227986		-0.782016	0.000914519		-0.785283	0.00126989		-0.784105	0.00159912		-0.783461	0.00152389		-0.781373	0.00255954		-0.775601	0.00208613		-0.782427	0.000809774		-0.77739	0.00162807		-0.785952	0.00202211		-0.782703	0.00109449		-0.778018	0.000579376		-0.777061	0.00104741		-0.778819	0.00192195
-0.776602	0.00341845		-0.776878	0.00507983		-0.773121	0.00215068		-0.774516	0.00147648		-0.779034	0.00222504		-0.778479	0.00152763		-0.778149	0.0021433		-0.776372	0.00186318		-0.770913	0.00174027		-0.774301	0.00130243		-0.769265	0.00232569		-0.779391	0.00160972		-0.776454	0.000780056		-0.770511	0.00157119		-0.770496	0.000731299		-0.772257	0.00123992
-0.772226	0.0038857		-0.769374	0.00507694		-0.765933	0.00180773		-0.769515	0.00179581		-0.770909	0.00253485		-0.770044	0.00168536		-0.770337	0.00199168		-0.771997	0.000858379		-0.762788	0.00198799		-0.768358	0.00126627		-0.763325	0.00174427		-0.771266	0.00226215		-0.768329	0.00075062		-0.762698	0.00152209		-0.76237	0.000989219		-0.764132	0.00103342
-0.768164	0.00416693		-0.765002	0.00479972		-0.761246	0.00189632		-0.76514	0.00211036		-0.764971	0.00197793		-0.763479	0.00214356		-0.763461	0.00210863		-0.765122	0.000808778		-0.755288	0.00175297		-0.764299	0.000911681		-0.759263	0.0017392		-0.765643	0.00172101		-0.76208	0.00142386		-0.757701	0.00258483		-0.756748	0.00105752		-0.758196	0.00137738
-0.761289	0.00403243		-0.760314	0.00546963		-0.756559	0.00227167		-0.757953	0.00163967		-0.760909	0.00185252		-0.760042	0.00166659		-0.759085	0.00166297		-0.75731	0.000829789		-0.751226	0.00203232		-0.758363	0.00108218		-0.753327	0.00175175		-0.761576	0.00215596		-0.758018	0.000834022		-0.75333	0.0026791		-0.752998	0.00135655		-0.75413	0.0020299
-0.753789	0.00339142		-0.752502	0.0050016		-0.749371	0.00239894		-0.75014	0.000595188		-0.754971	0.00202233		-0.755041	0.00167932		-0.753773	0.00145706		-0.751683	0.00176484		-0.747163	0.00181926		-0.750238	0.00132391		-0.745202	0.00115316		-0.755015	0.00154822		-0.752391	0.000823764		-0.746143	0.00209274		-0.747371	0.00226961		-0.748194	0.0021337
-0.748789	0.00400472		-0.745002	0.00438332		-0.741558	0.00224747		-0.744826	0.00166516		-0.746533	0.00191933		-0.747229	0.00114316		-0.745961	0.00193592		-0.747621	0.00171806		-0.739976	0.00264161		-0.74399	0.000689239		-0.73864	0.00189303		-0.74689	0.00162366		-0.743953	0.00163303		-0.73833	0.00204582		-0.739559	0.00161582		-0.740069	0.00191823
-0.744414	0.00415723		-0.740314	0.00471994		-0.736871	0.00205656		-0.740764	0.00248135		-0.740595	0.00148452		-0.740667	0.0015111		-0.738774	0.00209004		-0.740747	0.00172607		-0.732476	0.0030897		-0.739923	0.0015755		-0.734578	0.00208141		-0.741267	0.00202432		-0.737704	0.00144839		-0.733638	0.00228979		-0.733623	0.00135498		-0.733508	0.00177357
-0.737539	0.00380833		-0.736564	0.00508226		-0.732496	0.00221584		-0.733577	0.00209534		-0.736846	0.00255336		-0.736292	0.00175148		-0.734711	0.00115383		-0.732621	0.00162709		-0.727788	0.00278129		-0.7343	0.00129915		-0.728951	0.00162983		-0.737826	0.00173937		-0.733955	0.00189885		-0.729579	0.00195286		-0.729247	0.00195957		-0.729754	0.00160049
-0.729727	0.00453079		-0.72969	0.00478775		-0.724996	0.00271864		-0.725451	0.00224032		-0.731534	0.00209367		-0.731295	0.0019235		-0.730336	0.00130294		-0.727311	0.00162752		-0.723102	0.00167183		-0.725862	0.00182029		-0.720826	0.00187719		-0.73189	0.00159291		-0.728953	0.00161185		-0.723018	0.00211587		-0.723621	0.00216851		-0.723818	0.00135072
-0.723789	0.00491812		-0.72219	0.0046098		-0.717183	0.00239779		-0.720454	0.00284234		-0.724034	0.00247811		-0.723791	0.00259617		-0.723149	0.00140172		-0.723561	0.00198361		-0.716226	0.00197486		-0.719301	0.00232698		-0.714265	0.00210958		-0.724078	0.00143672		-0.721141	0.00186206		-0.715518	0.0031738		-0.715808	0.00133049		-0.71538	0.00193681
-0.719726	0.00426554		-0.716876	0.00580912		-0.712496	0.00270588		-0.717017	0.00206211		-0.717471	0.00282719		-0.716291	0.00268643		-0.715649	0.00150363		-0.717935	0.0019522		-0.708413	0.00253702		-0.715547	0.00235174		-0.710515	0.00237036		-0.718142	0.00159999		-0.71458	0.00178244		-0.710201	0.00264636		-0.708621	0.00200675		-0.709132	0.00243461
-0.713789	0.00432165		-0.712188	0.00759392		-0.708746	0.00238389		-0.710452	0.00236254		-0.712783	0.00284035		-0.711294	0.00305929		-0.710961	0.00279842		-0.710122	0.00170376		-0.702788	0.0022314		-0.710863	0.00157857		-0.705514	0.00291459		-0.713771	0.00153185		-0.709891	0.00127735		-0.705829	0.00254729		-0.704246	0.00239003		-0.705691	0.00229803
-0.705664	0.00435226		-0.705627	0.00675781		-0.702183	0.00260833		-0.70264	0.00314255		-0.707783	0.00258008		-0.706919	0.0014939		-0.706275	0.00224061		-0.704186	0.00155626		-0.698726	0.00287943		-0.703363	0.00126518		-0.698014	0.00276362		-0.70814	0.0016845		-0.70489	0.00209308		-0.69958	0.00261974		-0.699249	0.00304202		-0.700694	0.00191255
-0.699414	0.0039952		-0.697814	0.0073373		-0.694371	0.00305531		-0.69733	0.0024941		-0.700284	0.00165804		-0.700045	0.00177539		-0.699399	0.00227006		-0.699811	0.00213501		-0.692475	0.00297477		-0.696176	0.00229235		-0.691453	0.00295773		-0.70064	0.00245883		-0.697703	0.00270165		-0.691768	0.00253463		-0.691745	0.0031065		-0.692881	0.0026621
-0.695039	0.00435464		-0.691875	0.00634917		-0.689059	0.0030353		-0.692954	0.00292336		-0.692784	0.00203611		-0.691919	0.00276283		-0.691586	0.00307743		-0.694184	0.00316125		-0.684352	0.00369232		-0.691797	0.0028352		-0.686764	0.00401186		-0.693454	0.00326679		-0.690204	0.00285374		-0.685512	0.00230136		-0.684245	0.00342913		-0.68632	0.00317826
-0.689414	0.00510719		-0.687812	0.00601987		-0.684683	0.00308598		-0.687015	0.00270623		-0.687783	0.00237285		-0.686606	0.00310374		-0.685961	0.00305988		-0.686372	0.00326306		-0.678414	0.00416494		-0.6868	0.00179071		-0.681763	0.00317053		-0.689082	0.00284401		-0.685203	0.00345874		-0.68114	0.00361614		-0.679561	0.00281803		-0.681628	0.00336991
-0.681288	0.00466562		-0.681876	0.00606796		-0.678434	0.00337635		-0.678889	0.00265707		-0.683407	0.00252992		-0.682543	0.00289531		-0.681899	0.00267333		-0.679185	0.00332089		-0.674352	0.00430311		-0.679613	0.00262437		-0.674576	0.0029542		-0.684077	0.00304799		-0.680514	0.0035553		-0.675517	0.00284058		-0.674873	0.00300989		-0.676631	0.00325824
-0.674726	0.00407817		-0.673751	0.00683759		-0.670621	0.00357526		-0.672328	0.00388249		-0.676221	0.00291046		-0.675669	0.00364483		-0.675648	0.00327039		-0.67481	0.00359099		-0.668101	0.00425942		-0.6718	0.00359741		-0.666764	0.00447224		-0.676265	0.00304113		-0.67364	0.00284749		-0.667705	0.0037163		-0.667373	0.00329478		-0.669131	0.00450559
-0.670976	0.00449712		-0.66719	0.0065105		-0.664371	0.00332586		-0.668265	0.00328617		-0.668408	0.00357203		-0.667231	0.00353938		-0.667523	0.0035542		-0.669808	0.00367849		-0.659663	0.00480329		-0.666795	0.00408942		-0.661763	0.00432897		-0.669078	0.00331348		-0.665515	0.00359299		-0.660831	0.00412656		-0.659873	0.00386476		-0.661631	0.00471341
-0.666289	0.00479281		-0.662814	0.00784478		-0.659995	0.0036448		-0.662951	0.00361483		-0.663409	0.00362363		-0.66223	0.00355569		-0.661585	0.00452133		-0.661996	0.00400209		-0.653726	0.00559207		-0.662424	0.00379159		-0.657387	0.00435362		-0.664393	0.00359976		-0.660205	0.00513124		-0.656764	0.00477685		-0.655498	0.00565178		-0.656947	0.00486835
-0.658477	0.00465695		-0.657188	0.00818605		-0.654371	0.0050288		-0.654826	0.00444445		-0.659033	0.00422126		-0.658793	0.00361802		-0.657523	0.00514512		-0.654809	0.00475		-0.650289	0.00573863		-0.65555	0.00393645		-0.650513	0.00567382		-0.659701	0.00494577		-0.656142	0.00483956		-0.651141	0.00564559		-0.651435	0.00604383		-0.652255	0.005973
-0.651914	0.00601141		-0.649062	0.00800854		-0.646246	0.00608318		-0.647952	0.00470187		-0.651847	0.00448852		-0.652544	0.00442897		-0.651274	0.00516183		-0.650121	0.00557784		-0.644664	0.00651945		-0.647424	0.00492374		-0.642388	0.00501691		-0.651889	0.00497408		-0.649264	0.00576033		-0.643016	0.00670221		-0.644561	0.00614044		-0.645068	0.00603747
-0.647226	0.00671296		-0.642501	0.00879324		-0.639371	0.00698685		-0.643577	0.00540404		-0.644034	0.00494224		-0.644732	0.00552365		-0.643149	0.00485588		-0.645436	0.00526659		-0.637164	0.00705363		-0.642114	0.00485667		-0.637078	0.00569032		-0.644389	0.0039106		-0.641139	0.0062652		-0.636142	0.0063655		-0.637058	0.00616875		-0.637255	0.00612925
-0.642226	0.00678777		-0.638751	0.00933972		-0.635309	0.00757692		-0.638267	0.0054384		-0.639033	0.00603821		-0.638792	0.00645144		-0.636899	0.00635116		-0.637937	0.00584686		-0.630601	0.00803654		-0.638048	0.00540544		-0.633015	0.00681663		-0.640017	0.00466302		-0.636142	0.0063854		-0.632388	0.0080314		-0.631748	0.00676704		-0.631945	0.00756847
-0.635039	0.00664154		-0.63375	0.00965484		-0.629996	0.00761216		-0.630454	0.00551306		-0.635283	0.00654724		-0.634729	0.00624926		-0.633461	0.00693193		-0.630124	0.00655903		-0.626226	0.00785037		-0.631174	0.00652816		-0.626137	0.00722838		-0.635958	0.00598558		-0.632392	0.00658721		-0.627704	0.0067607		-0.627372	0.00851834		-0.627566	0.00788534
-0.627227	0.00792068		-0.626251	0.00976365		-0.62187	0.00648881		-0.623267	0.00696564		-0.629033	0.00584126		-0.628794	0.00560854		-0.62815	0.00736799		-0.626061	0.00615053		-0.621226	0.00722344		-0.623049	0.00617576		-0.617703	0.00814629		-0.629077	0.0071754		-0.62614	0.00704057		-0.620204	0.0075559		-0.620811	0.00783939		-0.620692	0.00818144
-0.622226	0.0083563		-0.619376	0.00881053		-0.614996	0.00718824		-0.619205	0.00796619		-0.62122	0.00717283		-0.620981	0.00742481		-0.620337	0.00781552		-0.621999	0.00752095		-0.613414	0.00935756		-0.617738	0.00677318		-0.612702	0.00894272		-0.621577	0.00759619		-0.61864	0.00800639		-0.61333	0.00900663		-0.612686	0.00909416		-0.612567	0.00893711
-0.617851	0.00883697		-0.615001	0.010559		-0.611245	0.00913182		-0.614829	0.00902729		-0.615595	0.00901507		-0.614107	0.00884767		-0.613774	0.00899483		-0.615121	0.0078753		-0.606227	0.0103906		-0.614298	0.00807912		-0.609265	0.010106		-0.61658	0.00726389		-0.612704	0.00840556		-0.608638	0.00919539		-0.606746	0.00954912		-0.607569	0.0102279
-0.610976	0.00891297		-0.61	0.0105871		-0.606871	0.00889023		-0.607642	0.00904276		-0.61122	0.00857081		-0.610045	0.0089625		-0.609398	0.00935486		-0.607621	0.00841247		-0.601539	0.0106368		-0.608049	0.00910717		-0.603013	0.00989672		-0.612208	0.00759022		-0.608642	0.00824143		-0.603954	0.0100303		-0.602683	0.00994274		-0.604128	0.0100105
-0.603163	0.00877933		-0.6025	0.0114846		-0.599371	0.0100073		-0.600451	0.0102484		-0.605282	0.00933064		-0.604731	0.00965371		-0.604399	0.0103124		-0.602624	0.0100324		-0.59685	0.0113382		-0.600549	0.0108483		-0.595513	0.0110521		-0.605639	0.00858225		-0.602702	0.0102366		-0.596767	0.0111271		-0.596748	0.0109335		-0.59788	0.0108075
-0.597852	0.009184		-0.595001	0.0134301		-0.592183	0.0120583		-0.595767	0.0129888		-0.597159	0.0109075		-0.596918	0.011583		-0.5969	0.0102539		-0.597936	0.0100105		-0.589351	0.0128428		-0.594614	0.0109908		-0.589577	0.0125479		-0.597514	0.0105119		-0.594577	0.0113911		-0.588954	0.012784		-0.588622	0.0126835		-0.590068	0.0120701
-0.593476	0.0103327		-0.589999	0.0138935		-0.587808	0.012625		-0.591079	0.0129662		-0.590596	0.0122968		-0.589731	0.0118676		-0.589398	0.011769		-0.591371	0.0116547		-0.581851	0.0150633		-0.590235	0.0121672		-0.585202	0.0139372		-0.591891	0.0117059		-0.588016	0.0116145		-0.583637	0.0139207		-0.58237	0.0137933		-0.584445	0.0144864
-0.586601	0.0124394		-0.585628	0.0155331		-0.583121	0.0144418		-0.584205	0.0142333		-0.586533	0.0134725		-0.585356	0.0143336		-0.584712	0.0149799		-0.583558	0.013154		-0.576852	0.0152613		-0.584612	0.0142608		-0.579262	0.015424		-0.587832	0.0135665		-0.58364	0.0130255		-0.579265	0.0149601		-0.577998	0.0168834		-0.580065	0.0158504
-0.578477	0.0141941		-0.57875	0.0161051		-0.575934	0.0156624		-0.576079	0.0159262		-0.581221	0.0143808		-0.580355	0.0145226		-0.580336	0.0159777		-0.577622	0.0136606		-0.572164	0.01662		-0.576799	0.0160384		-0.57145	0.0162175		-0.581889	0.0131864		-0.57833	0.0148313		-0.572704	0.0157272		-0.572372	0.0178059		-0.57413	0.0162892
-0.573164	0.0166124		-0.570625	0.0170342		-0.568121	0.0182044		-0.570765	0.0177717		-0.573409	0.0166536		-0.572542	0.0163458		-0.572836	0.0159733		-0.57356	0.0154922		-0.564977	0.0188615		-0.569925	0.016963		-0.564889	0.0187675		-0.573764	0.0147096		-0.570518	0.0171884		-0.564891	0.0173878		-0.564246	0.0173777		-0.566317	0.0182597
-0.569727	0.0174056		-0.565315	0.0202546		-0.562807	0.0196573		-0.566703	0.018564		-0.566533	0.0180641		-0.565043	0.0176922		-0.565024	0.0177808		-0.567624	0.0190303		-0.557164	0.0227563		-0.565546	0.0199167		-0.560513	0.0231834		-0.567202	0.0178767		-0.563327	0.0205181		-0.558955	0.0213935		-0.557685	0.0224085		-0.559756	0.0215011
-0.563476	0.0179492		-0.561252	0.0220937		-0.558434	0.0203589		-0.560142	0.0196155		-0.562159	0.0193344		-0.56098	0.0205116		-0.560023	0.0215687		-0.559499	0.0211175		-0.552476	0.0229608		-0.560549	0.0207315		-0.555203	0.0246792		-0.563144	0.0199884		-0.558955	0.0221486		-0.554889	0.0236562		-0.553935	0.0245211		-0.555384	0.0239438
-0.555977	0.0204927		-0.554378	0.0228106		-0.551871	0.0226164		-0.552016	0.022591		-0.556845	0.0203921		-0.556917	0.0211333		-0.555649	0.0235387		-0.553247	0.022348		-0.548726	0.0248155		-0.552736	0.02095		-0.547391	0.0252432		-0.557521	0.0202463		-0.553954	0.0228973		-0.548641	0.0233343		-0.548934	0.0265481		-0.550067	0.0238324
-0.550039	0.0220537		-0.54594	0.0263518		-0.543745	0.0246421		-0.546077	0.0272202		-0.549033	0.0247063		-0.54973	0.0222253		-0.54846	0.0244903		-0.548871	0.0231641		-0.542163	0.0286299		-0.545236	0.025034		-0.5402	0.0287027		-0.549395	0.0212886		-0.546142	0.0254428		-0.540202	0.0268128		-0.541435	0.0288188		-0.542254	0.0270447
-0.545664	0.025479		-0.540626	0.0315331		-0.538121	0.0307278		-0.542014	0.0288347		-0.541846	0.0298646		-0.542231	0.0266572		-0.540648	0.0296119		-0.543248	0.0277309		-0.534663	0.0326958		-0.540865	0.0287467		-0.535515	0.0322973		-0.542826	0.0272069		-0.538955	0.0306294		-0.53458	0.0314096		-0.534248	0.0319985		-0.535067	0.0335131
-0.540039	0.027221		-0.537189	0.0347373		-0.534058	0.0360946		-0.535766	0.0307611		-0.537783	0.0335861		-0.53723	0.0301883		-0.535962	0.0347524		-0.535123	0.0298488		-0.529038	0.0376196		-0.53586	0.0302829		-0.530827	0.0356034		-0.53908	0.0290208		-0.534892	0.0354578		-0.531139	0.0355582		-0.529872	0.035904		-0.530696	0.0382136
-0.532226	0.0307392		-0.53094	0.0356652		-0.527497	0.0379539		-0.52764	0.037168		-0.533408	0.0356775		-0.532854	0.0334015		-0.532212	0.0394727		-0.528562	0.0349874		-0.524663	0.0416647		-0.52836	0.0337894		-0.523015	0.0402911		-0.534083	0.0296133		-0.530517	0.0370228		-0.525203	0.0403503		-0.524871	0.0382574		-0.525691	0.0389105
-0.525351	0.0352875		-0.523437	0.0396221		-0.519371	0.0416317		-0.521392	0.0411231		-0.526221	0.0387997		-0.526293	0.0364487		-0.525649	0.0402632		-0.525121	0.0405158		-0.518725	0.044984		-0.52086	0.0412461		-0.515515	0.0455252		-0.526271	0.0345319		-0.52333	0.0411365		-0.517703	0.0443017		-0.517371	0.041653		-0.517878	0.0440793
-0.520977	0.0418444		-0.517501	0.0467529		-0.513747	0.0489735		-0.517955	0.0456076		-0.519034	0.0433314		-0.518168	0.0416004		-0.517836	0.0447693		-0.520124	0.041922		-0.5106	0.050891		-0.516489	0.0479978		-0.511452	0.0507265		-0.519702	0.0411778		-0.51583	0.0479072		-0.511768	0.0496217		-0.509872	0.0487139		-0.510691	0.052587
-0.515664	0.0454137		-0.513126	0.0512237		-0.510308	0.0532		-0.512641	0.0493319		-0.514033	0.0481266		-0.512545	0.0496148		-0.512524	0.0510271		-0.512311	0.046216		-0.504352	0.0601117		-0.512422	0.0493673		-0.507077	0.0556895		-0.515017	0.0461431		-0.511142	0.052908		-0.507388	0.0562704		-0.504871	0.0570561		-0.50632	0.0622383
-0.507851	0.0488535		-0.507503	0.0549177		-0.50437	0.0587918		-0.504828	0.0573311		-0.509658	0.0536285		-0.508169	0.0532717		-0.508149	0.0586908		-0.505746	0.0550446		-0.500289	0.0668834		-0.505548	0.0529102		-0.500203	0.0622053		-0.51002	0.0490059		-0.506766	0.0553264		-0.501766	0.0613659		-0.500495	0.0642617		-0.502253	0.0667712
-0.500664	0.0573379		-0.49969	0.0598514		-0.496557	0.065136		-0.498267	0.0626118		-0.502783	0.058749		-0.50223	0.0580174		-0.501898	0.0618893		-0.501374	0.0599339		-0.494664	0.0680055		-0.498049	0.0602967		-0.492703	0.0706388		-0.502833	0.0523616		-0.499892	0.0595024		-0.493953	0.0658178		-0.493621	0.068714		-0.495066	0.0706474
-0.496289	0.0658043		-0.492812	0.0696618		-0.49062	0.074043		-0.493892	0.0718393		-0.494658	0.0658696		-0.494104	0.0663216		-0.494086	0.0700359		-0.496373	0.0667047		-0.486852	0.0775804		-0.493051	0.0692527		-0.487702	0.0793031		-0.495333	0.0589169		-0.49208	0.0688403		-0.486766	0.0748977		-0.485496	0.0783718		-0.487567	0.0794191
-0.491289	0.0675618		-0.488437	0.0776354		-0.486246	0.0796331		-0.488578	0.0763939		-0.489033	0.0753376		-0.487856	0.0743683		-0.487525	0.0792867		-0.488874	0.0724992		-0.479976	0.0881417		-0.488672	0.0752805		-0.483327	0.0853255		-0.490329	0.0713381		-0.48614	0.0802385		-0.482387	0.0862867		-0.480186	0.0888884		-0.482882	0.0890885
-0.483476	0.0727958		-0.48344	0.0843272		-0.480622	0.087262		-0.481078	0.0822161		-0.484971	0.0832396		-0.483793	0.079552		-0.483462	0.0891585		-0.481061	0.0779423		-0.4756	0.0983322		-0.482111	0.0787355		-0.476765	0.09159		-0.485957	0.0790245		-0.481765	0.0878651		-0.47739	0.0919404		-0.476123	0.093976		-0.478503	0.0964758
-0.476289	0.0900061		-0.475627	0.090412		-0.47312	0.0972015		-0.473891	0.0965425		-0.47872	0.0862541		-0.477854	0.0851719		-0.477835	0.0952527		-0.47606	0.0909871		-0.470288	0.101658		-0.473985	0.0903561		-0.46864	0.100447		-0.479083	0.0875326		-0.475516	0.0948268		-0.46989	0.0968933		-0.469245	0.0984436		-0.471629	0.102738
-0.471914	0.0996308		-0.46844	0.101394		-0.465933	0.10489		-0.469203	0.109067		-0.470595	0.094247		-0.469729	0.0940294		-0.470023	0.100663		-0.471997	0.0983848		-0.462163	0.110391		-0.46805	0.103183		-0.463013	0.112779		-0.470958	0.0924001		-0.467391	0.101687		-0.46239	0.110468		-0.461124	0.107303		-0.463504	0.113851
-0.467851	0.105011		-0.463752	0.114703		-0.461245	0.12026		-0.464515	0.11507		-0.464657	0.108233		-0.46348	0.108198		-0.463149	0.111092		-0.46481	0.106233		-0.455289	0.125441		-0.463983	0.108755		-0.458951	0.120857		-0.46564	0.103647		-0.461452	0.113906		-0.457706	0.12256		-0.45581	0.122437		-0.457568	0.124593
-0.460976	0.111067		-0.459064	0.117978		-0.456558	0.124856		-0.457328	0.117604		-0.460597	0.120185		-0.45973	0.119723		-0.459086	0.124392		-0.456685	0.116262		-0.451226	0.138646		-0.457735	0.112175		-0.452702	0.129816		-0.461581	0.113438		-0.457393	0.125888		-0.453014	0.129426		-0.452373	0.133415		-0.453822	0.134853
-0.453477	0.12186		-0.451251	0.128253		-0.448746	0.131474		-0.449515	0.129915		-0.454346	0.129602		-0.454729	0.12211		-0.453774	0.132378		-0.451371	0.130744		-0.446538	0.144482		-0.449609	0.129421		-0.444577	0.141121		-0.454707	0.119201		-0.451141	0.133232		-0.445514	0.136723		-0.446433	0.137602		-0.447566	0.145769
-0.448477	0.13379		-0.443752	0.141533		-0.441246	0.15137		-0.444514	0.14007		-0.445908	0.136708		-0.446917	0.127567		-0.445649	0.139481		-0.447621	0.139203		-0.439351	0.151778		-0.443361	0.139767		-0.438325	0.151141		-0.446269	0.131885		-0.443015	0.144341		-0.437701	0.150149		-0.438621	0.144266		-0.43944	0.154154
-0.444101	0.142475		-0.439689	0.155735		-0.436871	0.163618		-0.440139	0.151077		-0.440283	0.151716		-0.440355	0.141812		-0.438462	0.156115		-0.440747	0.147525		-0.432475	0.162403		-0.439302	0.156479		-0.434266	0.170047		-0.441264	0.145633		-0.436767	0.156777		-0.43333	0.166816		-0.432685	0.160405		-0.433192	0.166473
-0.437226	0.151216		-0.435626	0.162714		-0.432183	0.16661		-0.432952	0.162251		-0.436846	0.1606		-0.43598	0.155436		-0.434712	0.170511		-0.432622	0.162814		-0.427476	0.178349		-0.433672	0.15949		-0.428326	0.176284		-0.437831	0.157437		-0.43333	0.168949		-0.429576	0.173611		-0.42831	0.178479		-0.429133	0.178628
-0.429414	0.162965		-0.428439	0.170257		-0.424683	0.176047		-0.424827	0.177058		-0.431222	0.167914		-0.430979	0.163268		-0.430024	0.177798		-0.427308	0.178784		-0.422788	0.187658		-0.425546	0.171105		-0.419888	0.181203		-0.431582	0.163358		-0.428016	0.173231		-0.422702	0.182805		-0.422683	0.189065		-0.423197	0.188326
-0.423789	0.17937		-0.421252	0.185058		-0.41687	0.192908		-0.420142	0.194408		-0.423409	0.178421		-0.423479	0.17203		-0.422837	0.186347		-0.423871	0.186846		-0.415914	0.196064		-0.418985	0.183583		-0.41364	0.200748		-0.42377	0.173286		-0.420516	0.181067		-0.415202	0.193679		-0.414871	0.20103		-0.414759	0.20279
-0.419414	0.1926		-0.415939	0.200868		-0.412495	0.207382		-0.416392	0.201838		-0.417159	0.194486		-0.415979	0.187836		-0.415648	0.202695		-0.417623	0.188405		-0.408101	0.208252		-0.415239	0.193659		-0.410203	0.220544		-0.418139	0.187389		-0.413955	0.200954		-0.409892	0.210745		-0.407996	0.212428		-0.408816	0.219029
-0.413477	0.201661		-0.411563	0.210802		-0.408745	0.217576		-0.409827	0.20657		-0.412783	0.208697		-0.410982	0.20516		-0.410962	0.215583		-0.40981	0.203566		-0.402476	0.226344		-0.410234	0.205954		-0.405202	0.228911		-0.413768	0.200063		-0.409579	0.2193		-0.405513	0.223048		-0.403621	0.225931		-0.405383	0.235846
-0.405351	0.213152		-0.405002	0.220005		-0.401871	0.225889		-0.402015	0.220445		-0.407471	0.215143		-0.406607	0.220555		-0.406273	0.222729		-0.403871	0.219722		-0.398414	0.241678		-0.402734	0.217075		-0.397389	0.237383		-0.407832	0.211456		-0.404266	0.225523		-0.398952	0.229164		-0.398311	0.241882		-0.39976	0.243998
-0.399101	0.229594		-0.396877	0.234223		-0.394371	0.241077		-0.396705	0.238263		-0.399972	0.227308		-0.399729	0.224882		-0.399399	0.232792		-0.399812	0.228933		-0.391851	0.248848		-0.396173	0.236903		-0.390828	0.25238		-0.400019	0.221443		-0.396766	0.232677		-0.391139	0.243974		-0.390498	0.244288		-0.39226	0.254318
-0.395039	0.241876		-0.390937	0.252425		-0.389057	0.256807		-0.392329	0.248501		-0.39247	0.241296		-0.391916	0.24137		-0.391587	0.251935		-0.393872	0.244573		-0.384038	0.26114		-0.391489	0.24924		-0.386452	0.26518		-0.393458	0.228891		-0.389266	0.248614		-0.385204	0.260244		-0.383308	0.260254		-0.386004	0.265895
-0.389102	0.249417		-0.386874	0.263598		-0.384684	0.273707		-0.386077	0.256688		-0.387784	0.260042		-0.386606	0.261458		-0.386273	0.264786		-0.38606	0.256792		-0.3781	0.281493		-0.386484	0.261529		-0.381451	0.273665		-0.389079	0.247504		-0.384578	0.268938		-0.381137	0.280677		-0.378936	0.274186		-0.38132	0.284037
-0.380664	0.264256		-0.380626	0.278389		-0.378433	0.285857		-0.378264	0.271889		-0.383095	0.27559		-0.382231	0.266728		-0.381899	0.280314		-0.379186	0.274629		-0.374038	0.298083		-0.379297	0.272002		-0.373952	0.283496		-0.383769	0.264566		-0.37989	0.277699		-0.375201	0.288977		-0.373935	0.278525		-0.376322	0.298148
-0.374414	0.283127		-0.372501	0.2828		-0.370308	0.295301		-0.372016	0.292649		-0.375908	0.281767		-0.375357	0.275162		-0.375336	0.290452		-0.375123	0.286972		-0.367789	0.298959		-0.371797	0.284489		-0.366452	0.301411		-0.375956	0.273389		-0.37239	0.285441		-0.367076	0.296455		-0.366435	0.295293		-0.368823	0.30801
-0.370976	0.297587		-0.366565	0.30678		-0.364058	0.312748		-0.36764	0.306204		-0.368096	0.292491		-0.367231	0.289076		-0.367524	0.304581		-0.369809	0.300709		-0.359351	0.305362		-0.3668	0.299778		-0.361451	0.3205		-0.368769	0.290978		-0.364577	0.300285		-0.360515	0.311365		-0.358936	0.317624		-0.361315	0.320984
-0.365664	0.302188		-0.362502	0.325619		-0.359995	0.331315		-0.362327	0.315981		-0.363408	0.318429		-0.36223	0.307988		-0.361586	0.320912		-0.361997	0.314538		-0.353726	0.326306		-0.362108	0.312635		-0.357075	0.329196		-0.36439	0.30914		-0.35958	0.321646		-0.356448	0.335223		-0.35456	0.33123		-0.356631	0.331829
-0.358164	0.312545		-0.35625	0.32729		-0.35437	0.33873		-0.354201	0.32656		-0.359034	0.330832		-0.358481	0.322622		-0.357523	0.34023		-0.35481	0.324759		-0.350289	0.351111		-0.355234	0.326013		-0.349889	0.340656		-0.359706	0.314506		-0.355518	0.329012		-0.350826	0.340069		-0.350498	0.339871		-0.351947	0.352044
-0.351601	0.334243		-0.348125	0.338574		-0.346245	0.349311		-0.347327	0.346677		-0.351533	0.329063		-0.352232	0.330842		-0.351273	0.34444		-0.350434	0.341886		-0.344663	0.357211		-0.347421	0.338612		-0.342076	0.359198		-0.351893	0.328943		-0.348327	0.344091		-0.3427	0.349043		-0.343311	0.356257		-0.34476	0.367224
-0.347227	0.351742		-0.341563	0.362219		-0.339684	0.368951		-0.343265	0.357957		-0.34372	0.343207		-0.34442	0.340498		-0.342837	0.35717		-0.345746	0.348974		-0.33685	0.369194		-0.342111	0.357448		-0.336762	0.376748		-0.344394	0.348496		-0.340205	0.360213		-0.336139	0.370821		-0.336124	0.37115		-0.336947	0.378222
-0.341914	0.364569		-0.338126	0.380513		-0.335621	0.382468		-0.337954	0.366715		-0.339034	0.366981		-0.338793	0.371144		-0.33721	0.376013		-0.337934	0.361569		-0.330913	0.388349		-0.338052	0.368585		-0.33239	0.389888		-0.340327	0.364973		-0.335517	0.375724		-0.332393	0.391209		-0.33081	0.38755		-0.331942	0.392681
-0.334414	0.37462		-0.333125	0.386753		-0.329996	0.389771		-0.329829	0.379232		-0.335597	0.381168		-0.334417	0.387407		-0.333773	0.388066		-0.330434	0.378887		-0.326539	0.407576		-0.331171	0.378709		-0.325513	0.397673		-0.336268	0.370081		-0.331767	0.383247		-0.327701	0.401143		-0.326434	0.400445		-0.327571	0.406915
-0.326914	0.394504		-0.325313	0.400742		-0.321871	0.409067		-0.322642	0.401591		-0.329033	0.393027		-0.328482	0.386942		-0.328148	0.396408		-0.326371	0.396311		-0.320914	0.414089		-0.323045	0.399965		-0.317387	0.415954		-0.329081	0.381726		-0.325202	0.397125		-0.320201	0.413412		-0.319873	0.410248		-0.320384	0.411168
-0.322226	0.40988		-0.318439	0.421766		-0.314995	0.425654		-0.318889	0.417326		-0.321221	0.405701		-0.320669	0.399031		-0.320336	0.414953		-0.322309	0.401096		-0.313413	0.425647		-0.318048	0.417654		-0.31239	0.435433		-0.321894	0.39455		-0.317702	0.415142		-0.313327	0.428453		-0.311748	0.432428		-0.312258	0.428873
-0.317539	0.414185		-0.314063	0.438199		-0.311558	0.439631		-0.314517	0.422266		-0.315909	0.420362		-0.313791	0.417568		-0.314085	0.426979		-0.315122	0.415954		-0.306226	0.443029		-0.314302	0.430453		-0.30864	0.44453		-0.31689	0.40789		-0.31208	0.43879		-0.308643	0.445067		-0.306121	0.446703		-0.307566	0.453789
-0.310351	0.424744		-0.309062	0.44675		-0.306872	0.455792		-0.307017	0.431385		-0.311534	0.436511		-0.309729	0.433167		-0.309712	0.442718		-0.307622	0.430986		-0.301539	0.464879		-0.308046	0.442339		-0.302388	0.460544		-0.312518	0.423865		-0.307704	0.448137		-0.303951	0.447376		-0.302059	0.462109		-0.30382	0.464397
-0.302539	0.448036		-0.30125	0.452083		-0.299059	0.462745		-0.299827	0.458625		-0.305283	0.443787		-0.304419	0.44146		-0.304398	0.459133		-0.302621	0.449803		-0.296851	0.473424		-0.300546	0.452513		-0.294888	0.478907		-0.305644	0.438156		-0.301765	0.461702		-0.296764	0.461596		-0.29581	0.471982		-0.297572	0.470719
-0.297227	0.470583		-0.29375	0.474329		-0.292496	0.480401		-0.295142	0.47659		-0.297471	0.460587		-0.296293	0.457086		-0.296898	0.473055		-0.298249	0.461713		-0.289351	0.487507		-0.294611	0.474726		-0.289265	0.490022		-0.297519	0.45753		-0.293952	0.473141		-0.288951	0.49083		-0.287685	0.481181		-0.289759	0.48997
-0.293164	0.475049		-0.288753	0.502292		-0.287808	0.499525		-0.290454	0.492026		-0.29122	0.484408		-0.289419	0.472881		-0.289711	0.485348		-0.291684	0.47391		-0.281852	0.506217		-0.290552	0.495264		-0.28489	0.499846		-0.291896	0.470813		-0.287391	0.49572		-0.283954	0.505257		-0.281436	0.502407		-0.284129	0.507821
-0.285976	0.482874		-0.284377	0.507769		-0.283121	0.516531		-0.283267	0.499231		-0.286847	0.504739		-0.285044	0.492434		-0.285023	0.507408		-0.283559	0.486365		-0.276851	0.522225		-0.284609	0.50901		-0.27895	0.517093		-0.287829	0.488897		-0.283015	0.506174		-0.279575	0.51872		-0.277374	0.523997		-0.279757	0.52414
-0.277852	0.506511		-0.277187	0.514492		-0.275933	0.531286		-0.275454	0.513455		-0.28122	0.513693		-0.280043	0.505491		-0.280024	0.51776		-0.277936	0.516837		-0.272475	0.539423		-0.276796	0.518354		-0.271138	0.53238		-0.281581	0.49794		-0.277705	0.520965		-0.272701	0.533954		-0.271434	0.534665		-0.273822	0.536645
-0.273164	0.528116		-0.269374	0.533739		-0.26812	0.544808		-0.270453	0.529562		-0.273408	0.52645		-0.271917	0.516835		-0.272524	0.530405		-0.273561	0.53441		-0.264976	0.544417		-0.269922	0.535026		-0.264577	0.550569		-0.273455	0.505539		-0.26958	0.532171		-0.264575	0.552081		-0.263309	0.545142		-0.266009	0.553018
-0.269414	0.541249		-0.264377	0.558741		-0.262808	0.568091		-0.266078	0.552161		-0.266533	0.550965		-0.264731	0.539166		-0.265023	0.547063		-0.267308	0.542264		-0.257163	0.563139		-0.265863	0.552896		-0.260201	0.570965		-0.26752	0.529311		-0.262702	0.555212		-0.259265	0.569782		-0.25706	0.563765		-0.259448	0.577576
-0.262852	0.552513		-0.260001	0.565028		-0.258745	0.583767		-0.259517	0.560372		-0.262471	0.559662		-0.260668	0.555532		-0.260336	0.573092		-0.259187	0.552603		-0.252477	0.593144		-0.260545	0.565024		-0.254887	0.581249		-0.263453	0.557879		-0.258327	0.570424		-0.255199	0.582264		-0.253311	0.589272		-0.255381	0.593706
-0.255352	0.566095		-0.252815	0.569929		-0.251871	0.591522		-0.251391	0.573105		-0.257159	0.562618		-0.256292	0.570783		-0.255961	0.584382		-0.253247	0.576694		-0.248727	0.601965		-0.252733	0.581219		-0.246766	0.603569		-0.257518	0.565542		-0.253329	0.578225		-0.248325	0.593584		-0.248309	0.595839		-0.249758	0.598611
-0.249726	0.583548		-0.245002	0.597452		-0.243746	0.607754		-0.245765	0.598414		-0.249034	0.581146		-0.249106	0.589611		-0.248461	0.597962		-0.249185	0.59351		-0.242164	0.604755		-0.245546	0.597257		-0.239888	0.616248		-0.24908	0.577714		-0.245204	0.59138		-0.240199	0.618453		-0.240497	0.613007		-0.241946	0.602193
-0.245039	0.601324		-0.240001	0.62265		-0.238434	0.630015		-0.241702	0.617559		-0.241847	0.608259		-0.242231	0.605878		-0.240649	0.615887		-0.243249	0.604359		-0.234351	0.625246		-0.241174	0.61526		-0.235512	0.639153		-0.243144	0.602157		-0.238017	0.618319		-0.234577	0.639742		-0.233936	0.630198		-0.234759	0.63061
-0.239414	0.612712		-0.236251	0.634501		-0.234059	0.644578		-0.235141	0.631198		-0.238095	0.622545		-0.23723	0.618844		-0.23596	0.633712		-0.235124	0.613788		-0.229039	0.640965		-0.236177	0.622111		-0.230515	0.643024		-0.23939	0.611212		-0.234267	0.639809		-0.231143	0.649314		-0.229247	0.651985		-0.23038	0.658583
-0.231602	0.62926		-0.230003	0.643586		-0.227183	0.651482		-0.226703	0.644286		-0.233721	0.631469		-0.232542	0.628549		-0.232211	0.642552		-0.228871	0.641321		-0.224664	0.657161		-0.228365	0.644422		-0.22239	0.652823		-0.23408	0.623717		-0.229579	0.646853		-0.2252	0.656425		-0.224246	0.670573		-0.225382	0.663877
-0.224726	0.649067		-0.22219	0.666696		-0.219057	0.664424		-0.22108	0.662045		-0.226222	0.645056		-0.225668	0.651107		-0.225649	0.646782		-0.225122	0.659462		-0.218413	0.666638		-0.220865	0.664473		-0.215203	0.681742		-0.22658	0.636721		-0.222392	0.653234		-0.217387	0.670099		-0.216747	0.679323		-0.21757	0.680463
-0.220664	0.6662		-0.216563	0.676849		-0.213745	0.684356		-0.217326	0.674759		-0.219346	0.664824		-0.217856	0.660622		-0.218148	0.670107		-0.219811	0.661338		-0.210601	0.690737		-0.217111	0.674282		-0.21114	0.700942		-0.220019	0.661767		-0.215514	0.678011		-0.211452	0.691281		-0.209247	0.682614		-0.210383	0.705493
-0.215352	0.679047		-0.212188	0.690258		-0.210308	0.694961		-0.211703	0.690338		-0.214347	0.692174		-0.212229	0.675273		-0.212836	0.696878		-0.212312	0.673238		-0.204351	0.714954		-0.21274	0.682165		-0.206765	0.716787		-0.215327	0.668937		-0.210517	0.698904		-0.207393	0.704303		-0.204559	0.70785		-0.206317	0.723426
-0.207227	0.687615		-0.206252	0.702943		-0.204058	0.711747		-0.204204	0.710515		-0.209658	0.702516		-0.208166	0.70539		-0.20846	0.706696		-0.205747	0.691127		-0.199977	0.733213		-0.205553	0.690931		-0.199578	0.726224		-0.21033	0.683628		-0.205829	0.707694		-0.201762	0.715501		-0.19987	0.730438		-0.201945	0.727367
-0.200352	0.708625		-0.19844	0.727178		-0.196558	0.730903		-0.197642	0.727589		-0.202784	0.713782		-0.201605	0.716		-0.201899	0.713355		-0.201371	0.711707		-0.19435	0.732598		-0.198358	0.717635		-0.192387	0.743672		-0.20283	0.701217		-0.198955	0.708626		-0.19395	0.734763		-0.192684	0.731189		-0.194758	0.745285
-0.195976	0.72844		-0.191875	0.747384		-0.190621	0.747412		-0.193267	0.736711		-0.194972	0.733234		-0.19348	0.722145		-0.194087	0.730108		-0.196061	0.729097		-0.186538	0.744218		-0.193361	0.738902		-0.18739	0.76164		-0.19533	0.72078		-0.191142	0.732395		-0.187076	0.760784		-0.184871	0.754965		-0.187571	0.763493
-0.190977	0.73768		-0.187499	0.764137		-0.186245	0.765703		-0.187953	0.744451		-0.189658	0.745608		-0.187544	0.743187		-0.187836	0.751972		-0.188561	0.738847		-0.179664	0.772594		-0.188989	0.7522		-0.183015	0.775493		-0.190333	0.738732		-0.185516	0.758958		-0.182704	0.770903		-0.179561	0.782264		-0.182566	0.778661
-0.182852	0.748698		-0.182189	0.779904		-0.18062	0.784133		-0.18014	0.756778		-0.185284	0.766638		-0.183481	0.758889		-0.183461	0.76754		-0.181371	0.763606		-0.175601	0.788192		-0.182115	0.756693		-0.17614	0.772446		-0.185954	0.757431		-0.181453	0.778512		-0.177387	0.793106		-0.175498	0.77744		-0.177882	0.790787
-0.175664	0.775551		-0.174377	0.779359		-0.172808	0.787917		-0.172954	0.784708		-0.178721	0.770611		-0.177229	0.771634		-0.177836	0.779593		-0.176374	0.780211		-0.170289	0.790123		-0.17399	0.78501		-0.168328	0.788905		-0.178767	0.758632		-0.174892	0.783327		-0.169574	0.798091		-0.168308	0.790991		-0.171008	0.801757
-0.171914	0.796298		-0.16719	0.801641		-0.165934	0.815064		-0.168265	0.804378		-0.170596	0.788755		-0.169104	0.781486		-0.169711	0.79528		-0.171998	0.788877		-0.162164	0.801419		-0.168359	0.80416		-0.162701	0.816856		-0.170955	0.781538		-0.166766	0.803027		-0.162387	0.803159		-0.160495	0.813039		-0.163195	0.815377
-0.167539	0.803108		-0.162814	0.812695		-0.161558	0.833896		-0.163577	0.809232		-0.164658	0.819816		-0.163168	0.803198		-0.163149	0.813325		-0.164811	0.794819		-0.154977	0.826441		-0.164301	0.818028		-0.158639	0.836196		-0.165644	0.792862		-0.160827	0.822825		-0.158016	0.824042		-0.155498	0.825096		-0.157572	0.833561
-0.160039	0.814853		-0.157813	0.825953		-0.156557	0.824413		-0.156077	0.815214		-0.160908	0.827238		-0.159418	0.822248		-0.159087	0.828229		-0.156999	0.815704		-0.151225	0.846166		-0.157739	0.821861		-0.15239	0.843125		-0.161578	0.809437		-0.157077	0.830988		-0.153018	0.841144		-0.151748	0.843413		-0.153506	0.842843
-0.152852	0.82823		-0.150001	0.830965		-0.148745	0.83626		-0.148578	0.836797		-0.154345	0.835604		-0.154104	0.823003		-0.153462	0.851919		-0.151685	0.839806		-0.146852	0.861187		-0.149927	0.827076		-0.144265	0.846301		-0.154704	0.826455		-0.150828	0.830241		-0.145511	0.851137		-0.145496	0.849987		-0.147257	0.852032
-0.148164	0.843142		-0.142814	0.851237		-0.141558	0.862415		-0.143577	0.848245		-0.146222	0.849331		-0.146292	0.83958		-0.145337	0.856677		-0.147622	0.847522		-0.139352	0.86136		-0.143984	0.847772		-0.138013	0.855677		-0.146266	0.835934		-0.14239	0.846183		-0.138011	0.86829		-0.137683	0.862627		-0.139132	0.86974
-0.143476	0.852273		-0.138751	0.875714		-0.136872	0.881607		-0.139201	0.857533		-0.140595	0.859273		-0.139731	0.855999		-0.138773	0.87872		-0.140435	0.850651		-0.132163	0.876232		-0.139925	0.855797		-0.134263	0.876349		-0.141269	0.855074		-0.136455	0.865556		-0.13364	0.885772		-0.13206	0.874839		-0.132884	0.884223
-0.136601	0.85909		-0.134376	0.880192		-0.132183	0.883524		-0.131701	0.875255		-0.136845	0.863285		-0.135668	0.869024		-0.135024	0.890286		-0.13231	0.86197		-0.127477	0.883124		-0.133676	0.86591		-0.128014	0.88535		-0.137828	0.86719		-0.133018	0.880847		-0.129268	0.889294		-0.127685	0.886594		-0.12913	0.890111
-0.128789	0.876039		-0.127189	0.880819		-0.124371	0.890364		-0.123889	0.889886		-0.13122	0.874279		-0.130354	0.877859		-0.130024	0.886882		-0.127309	0.871902		-0.122788	0.892699		-0.125238	0.894035		-0.119576	0.898116		-0.131579	0.872218		-0.127391	0.890668		-0.122386	0.883784		-0.121745	0.897472		-0.122882	0.902142
-0.123164	0.892262		-0.120002	0.898575		-0.116871	0.910545		-0.119204	0.904885		-0.123408	0.889363		-0.122542	0.876673		-0.122523	0.891571		-0.123559	0.891273		-0.115602	0.895668		-0.119302	0.906161		-0.113328	0.906048		-0.123767	0.885306		-0.119578	0.895422		-0.115199	0.904592		-0.113933	0.897139		-0.114443	0.910503
-0.119101	0.903291		-0.115001	0.92153		-0.112808	0.925284		-0.115455	0.903209		-0.11747	0.905772		-0.115355	0.897357		-0.115649	0.908646		-0.117311	0.902414		-0.107789	0.917966		-0.115862	0.906876		-0.109891	0.923079		-0.118144	0.897834		-0.113643	0.914563		-0.109889	0.928024		-0.107059	0.911474		-0.108508	0.921277
-0.112539	0.905805		-0.110313	0.925838		-0.108746	0.931008		-0.108577	0.911878		-0.113095	0.916778		-0.110666	0.90321		-0.11096	0.917335		-0.109498	0.907883		-0.102788	0.932516		-0.110552	0.917524		-0.104577	0.926758		-0.113765	0.911206		-0.109267	0.926841		-0.105518	0.929302		-0.102996	0.931635		-0.105067	0.930799
-0.104414	0.914756		-0.103439	0.935768		-0.101559	0.932484		-0.101077	0.91983		-0.10747	0.918824		-0.105982	0.898787		-0.106274	0.930749		-0.104184	0.914561		-0.0984145	0.925642		-0.102739	0.926796		-0.0970771	0.937922		-0.107829	0.911476		-0.103641	0.930551		-0.0989488	0.92957		-0.0976861	0.944519		-0.0994441	0.937644
-0.098789	0.926934		-0.0956261	0.943651		-0.0940573	0.937415		-0.095767	0.934974		-0.0999705	0.926923		-0.0987912	0.915817		-0.0990853	0.945259		-0.0998087	0.928948		-0.0918513	0.935749		-0.0961778	0.930307		-0.0905158	0.947034		-0.0997036	0.911075		-0.096141	0.933457		-0.0911363	0.952941		-0.0898736	0.94125		-0.0916316	0.942872
-0.0944135	0.940709		-0.0896866	0.94273		-0.0890582	0.949971		-0.0913915	0.941162		-0.0927836	0.947703		-0.0909787	0.931361		-0.0912728	0.946432		-0.0935602	0.932989		-0.083726	0.953956		-0.0917985	0.945889		-0.0861403	0.950007		-0.0931423	0.920521		-0.0889541	0.95466		-0.0852006	0.952953		-0.0826829	0.948324		-0.0853831	0.959407
-0.0881641	0.937906		-0.0856278	0.949247		-0.0846827	0.961394		-0.0848264	0.94765		-0.0880953	0.949057		-0.0859815	0.938593		-0.0862737	0.948222		-0.0857477	0.937747		-0.078414	0.951798		-0.0868013	0.946909		-0.0811393	0.965449		-0.0890835	0.942456		-0.0842658	0.963522		-0.0811418	0.95652		-0.0783113	0.959065		-0.0810038	0.969549
-0.0800388	0.955266		-0.0793755	0.966		-0.0781214	0.968527		-0.0770139	0.949551		-0.083409	0.956964		-0.081606	0.94275		-0.0818982	0.95835		-0.0791865	0.956304		-0.0743513	0.96022		-0.0793016	0.95159		-0.0733268	0.956051		-0.0837658	0.942094		-0.0795776	0.970644		-0.0751985	0.964406		-0.0729974	0.971813		-0.0756938	0.969844
-0.0741012	0.964433		-0.0712502	0.965233		-0.0699961	0.970897		-0.0707655	0.954415		-0.0755965	0.967659		-0.0744191	0.95924		-0.0750241	0.973765		-0.074811	0.960388		-0.0674754	0.971265		-0.0718019	0.970771		-0.0658271	0.967022		-0.0759533	0.953799		-0.0720779	0.964579		-0.0670808	0.969566		-0.0651849	0.976626		-0.0681941	0.9697
-0.0703514	0.959196		-0.0653145	0.976681		-0.0643713	0.970584		-0.0667028	0.961329		-0.0680968	0.979055		-0.0666066	0.95928		-0.0672116	0.977901		-0.0694971	0.969196		-0.059352	0.980099		-0.0671098	0.973156		-0.0611388	0.987057		-0.0690792	0.962783		-0.0642654	0.961979		-0.0605119	0.986557		-0.057998	0.98078		-0.0610072	0.986138
-0.0650394	0.959944		-0.0612519	0.986757		-0.0599959	0.978713		-0.0607672	0.970276		-0.0637213	0.979081		-0.0616055	0.966501		-0.0615869	0.977685		-0.0616846	0.973434		-0.0537253	0.984144		-0.0624253	0.981841		-0.0567633	0.987644		-0.0647076	0.967222		-0.0592643	0.968098		-0.0567658	0.985208		-0.0539353	0.984933		-0.0563227	0.999408
-0.0572269	0.96428		-0.0549996	0.99968		-0.0540583	0.989472		-0.0529547	0.975197		-0.059033	0.982161		-0.0581685	0.975368		-0.0575242	0.982372		-0.0544978	0.984235		-0.0502882	0.969913		-0.0552385	0.969436		-0.0492636	0.98513		-0.0593899	0.973417		-0.0548927	0.984046		-0.0508302	0.988606		-0.0495599	0.994105		-0.0516306	0.991104
-0.0506637	0.972013		-0.0465653	0.99495		-0.0462458	0.998796		-0.0463896	0.983042		-0.0515334	0.977156		-0.0512944	0.975336		-0.050961	0.985735		-0.0501223	0.985893		-0.0443507	0.971438		-0.047426	0.977706		-0.0414511	0.987018		-0.0515774	0.973974		-0.047702	0.982245		-0.0427049	0.99132		-0.042373	0.995374		-0.0441309	0.99522
-0.0466011	0.987022		-0.0406258	0.998718		-0.0396826	0.996852		-0.0420141	0.98569		-0.0437209	0.9702		-0.0434819	0.986919		-0.0428357	0.982602		-0.0451212	0.986152		-0.0365382	0.994319		-0.0424211	0.987435		-0.0364501	0.999344		-0.0443905	0.972694		-0.0398895	0.985561		-0.036136	1.00286		-0.0351861	0.995842		-0.0366313	1.0025
-0.0412891	0.993135		-0.0371888	1.00576		-0.0353091	0.998716		-0.0363912	0.985415		-0.0393454	0.98172		-0.038168	0.999035		-0.037211	1.00009		-0.0373087	0.985407		-0.0306006	0.99712		-0.0380494	0.994079		-0.0320746	0.99704		-0.0403317	0.992497		-0.035205	0.983907		-0.0323899	1.00586		-0.030185	0.995407		-0.031634	0.998969
-0.0337894	0.990465		-0.0315621	1.00912		-0.0296824	1.00101		-0.0282659	0.993068		-0.0355955	0.988835		-0.0337926	1.00189		-0.0337739	0.998521		-0.0301218	0.987326		-0.0265379	0.998726		-0.0308625	0.993111		-0.0248877	0.993878		-0.0359524	0.996086		-0.0311424	0.988418		-0.0273927	1.01637		-0.0258096	1.00572		-0.0269419	0.996547
-0.0262888	0.990363		-0.0240624	1.0084		-0.0212462	1.00451		-0.0217047	0.998411		-0.0287215	0.997364		-0.0278569	0.998072		-0.0278363	0.993926		-0.0260592	0.995028		-0.0209132	0.9996		-0.02305	0.99022		-0.0167624	0.996049		-0.0287655	0.990169		-0.0245773	1.00371		-0.019893	1.00122		-0.0189355	1.00161		-0.019755	0.997832
-0.0216015	0.988527		-0.0175011	1.0076		-0.0149958	1.00818		-0.0179548	0.99273		-0.0212218	1.00086		-0.0197316	0.987944		-0.0200238	1.00311		-0.0216837	0.995348		-0.0131007	0.999265		-0.0180528	1.0064		-0.012078	1.0006		-0.0215786	1.00379		-0.0170776	1.01434		-0.0133241	1.00121		-0.011123	0.989614		-0.0119425	1.00593
-0.0169142	0.997006		-0.0128129	1.00991		-0.0115588	1.00857		-0.0129537	0.987843		-0.0159079	1.00418		-0.0134793	0.989881		-0.0140863	1.01656		-0.0144968	0.994687		-0.00591377	1.0056		-0.0146119	1.00528		-0.00863712	0.997779		-0.0165814	1.0029		-0.0117675	1.01239		-0.00863962	1.0097		-0.00518351	0.999694		-0.00725808	1.01044
-0.00972631	0.998605		-0.00781178	1.00854		-0.00624489	1.00482		-0.00545404	0.984245		-0.0115324	1.00924		-0.00910386	0.991721		-0.0097108	1.0186		-0.00730995	0.998415		-0.00153831	1		-0.00805065	0.999708		-0.00207584	1		-0.0122021	1.00156		-0.00739206	1.00971		-0.00364236	1		-0.00112085	1		-0.00350442	1.01009
-0.00191381	1		7.17779e-07	1		0.0012548	1		0.00142386	1		-0.00497116	1.00139		-0.0037938	1		-0.00408603	1.00765		-0.00262168	0.993707		0.00346085	0.993585		-0.000238154	1		0.00573666	1.00677		-0.005328	1.00359		-0.00113977	1		0.00385733	0.998369		0.00512762	0.995746		0.00305686	1
0.0030863	1.00157		0.00718761	1.00816		0.00781608	1.00551		0.0057955	1.00015		0.00284134	1		0.0043315	0.991793		0.00372647	1		0.00206658	1		0.0109605	0.995659		0.00538471	1.0052		0.0110467	1.00143		0.00279731	1		0.00698554	0.997692		0.011357	0.9995		0.0132529	1.00936		0.0108694	0.998455
0.00746081	0.997106		0.0118759	1.0141		0.0125043	1.00476		0.0107966	1.00248		0.00909172	1.0059		0.0112056	0.993102		0.0109134	1.00849		0.00894066	0.996982		0.0184621	1.00512		0.00976398	1.00753		0.0154222	0.988694		0.00842017	0.990297		0.013234	0.994286		0.0163619	1.0046		0.0195014	1.01397		0.0161794	1.01053
0.0146487	0.98898		0.0165603	1.00734		0.0175035	0.998113		0.0179835	1.00011		0.0131544	0.996904		0.0152682	0.994835		0.0152888	1.00888		0.0167532	0.995011		0.0231485	0.996567		0.0156997	0.99418		0.0216745	0.999336		0.012479	0.985443		0.0172967	1.00125		0.0207336	1.00358		0.0235641	0.995313		0.0205587	1.01477
0.022774	0.995069		0.02406	1.00467		0.0246923	1.00859		0.025796	0.989227		0.019092	1.00163		0.0205821	0.989498		0.0199771	1.01085		0.022376	0.991731		0.0278368	1.00039		0.0235122	1.00338		0.029487	0.998881		0.0187351	0.992669		0.0229233	1.00543		0.0279204	1.0068		0.0295035	1.00444		0.0268072	1.00869
0.0274613	0.994698		0.0315597	1.00732		0.032192	1.00138		0.030797	0.983835		0.0269045	1.00437		0.0287074	0.98526		0.0277896	1.01098		0.0264387	0.994039		0.0356493	0.990292		0.0300734	1.00819		0.0357354	1.00421		0.0268604	0.993251		0.0307358	0.995349		0.0357329	0.999936		0.0379416	1.0116		0.0346197	1.00568
0.0312111	0.990607		0.0365608	1.00615		0.0371912	0.992816		0.0351725	0.99139		0.0334657	0.993596		0.0355815	0.990389		0.0352893	0.996922		0.0330038	1.00293		0.043149	0.985547		0.0344527	0.995434		0.0401109	1.00067		0.0327961	0.988573		0.0376099	0.990183		0.0407378	0.99755		0.0438773	1.00391		0.0408681	0.993647
0.0377733	0.983983		0.0409362	0.995436		0.0415666	0.998262		0.0417338	0.990299		0.0378412	0.995599		0.0396442	0.978275		0.0396647	0.993083		0.0408163	0.992724		0.0475244	0.9749		0.0397628	0.996398		0.0457376	0.994588		0.0368549	0.986488		0.0419854	0.992657		0.0451095	0.995214		0.0473144	0.988577		0.0449346	0.985243
0.0455858	0.98421		0.0481231	0.998818		0.0487535	0.997656		0.0498591	0.981779		0.0431551	0.991456		0.0440196	0.976065		0.0443511	0.988234		0.0470647	0.990977		0.0515871	0.967462		0.0475753	0.993714		0.0535501	0.99125		0.043111	0.981511		0.0472954	0.99702		0.0519836	0.98555		0.052941	0.977668		0.0505575	0.999774
0.0508988	0.982403		0.0562484	0.986034		0.056566	0.99016		0.0554857	0.97348		0.0512785	0.989816		0.0515193	0.984152		0.0521636	0.985255		0.0511274	0.979813		0.0584612	0.971162		0.0544493	0.984871		0.0604242	0.986833		0.0515415	0.975399		0.0554207	0.983132		0.0601089	0.987848		0.0604407	0.971416		0.0586828	0.996636
0.0552733	0.977287		0.0609367	0.982902		0.0618799	0.982074		0.0592356	0.96124		0.0581545	0.98541		0.0583934	0.981377		0.0596633	0.983554		0.0573759	0.980656		0.065648	0.971087		0.0588286	0.992085		0.0647996	0.977902		0.0574848	0.968926		0.0622948	0.973006		0.0651137	0.976174		0.067002	0.973247		0.0655569	0.985583
0.0615236	0.974233		0.0643737	0.976547		0.0662534	0.976685		0.0661097	0.965583		0.0615915	0.977801		0.0633945	0.963247		0.0640387	0.973292		0.0655012	0.969618		0.0709619	0.95938		0.0641387	0.982527		0.0697969	0.968841		0.060918	0.97787		0.0660447	0.96189		0.0688598	0.980472		0.0713775	0.965331		0.0696157	0.978392
0.0693362	0.962256		0.070935	0.980495		0.0731294	0.976537		0.0745478	0.963136		0.0665926	0.979366		0.0680827	0.949024		0.0681014	0.970649		0.0714407	0.961608		0.0753374	0.94979		0.0719512	0.973259		0.0779222	0.973032		0.0662357	0.967515		0.0707329	0.973379		0.0751082	0.967364		0.0763785	0.966278		0.0749334	0.972109
0.0755856	0.960715		0.0787475	0.966934		0.0812547	0.966873		0.0798578	0.944663		0.0740923	0.975552		0.0749568	0.950851		0.0749755	0.97585		0.0751905	0.963256		0.0818987	0.94675		0.0791381	0.964757		0.0851129	0.963859		0.0740482	0.963114		0.0779198	0.968182		0.0826079	0.971826		0.084191	0.967419		0.0830587	0.959228
0.079961	0.953981		0.0840614	0.961394		0.0862539	0.957462		0.0832987	0.939955		0.0809663	0.969092		0.0827693	0.956563		0.0821643	0.95718		0.0805044	0.960614		0.0897112	0.948417		0.0828917	0.958269		0.0888627	0.954596		0.0806095	0.958123		0.0851105	0.95804		0.0885512	0.961214		0.0916907	0.94911		0.0899328	0.96184
0.085274	0.956645		0.0884368	0.952436		0.0900037	0.95922		0.0892344	0.93778		0.0853418	0.962944		0.0880832	0.942204		0.0874762	0.957765		0.0880041	0.945671		0.0956487	0.942348		0.0872634	0.949328		0.0935472	0.947784		0.0849811	0.948823		0.089795	0.937782		0.0926101	0.951297		0.096379	0.934127		0.0936788	0.956062
0.0933983	0.950883		0.0946853	0.943144		0.0962541	0.952833		0.0970469	0.936672		0.090341	0.957261		0.0924586	0.937533		0.0918517	0.950202		0.0945654	0.944464		0.0997114	0.925319		0.0947631	0.935798		0.100738	0.949667		0.089986	0.936024		0.0944832	0.947177		0.0985457	0.953534		0.101067	0.930697		0.0983709	0.946226
0.100273	0.939414		0.102811	0.935991		0.103754	0.934431		0.102986	0.939529		0.0975298	0.936451		0.0990199	0.931929		0.098413	0.953453		0.0989408	0.932953		0.105649	0.922184		0.101637	0.929874		0.107925	0.932763		0.0977985	0.94057		0.10167	0.944378		0.106671	0.943435		0.108254	0.924008		0.105871	0.937832
0.104336	0.923086		0.109063	0.920297		0.109691	0.925493		0.107358	0.913316		0.105342	0.938096		0.107145	0.921383		0.106538	0.93433		0.104251	0.923095		0.113774	0.918366		0.106642	0.91835		0.112609	0.914215		0.104985	0.933868		0.10917	0.922165		0.113232	0.925368		0.116067	0.905047		0.113057	0.920671
0.109649	0.914517		0.113438	0.915988		0.113754	0.919518		0.112985	0.91585		0.110341	0.921177		0.112768	0.909502		0.112476	0.919652		0.111754	0.92129		0.120336	0.913167		0.111326	0.912745		0.117297	0.908748		0.10967	0.916718		0.114797	0.911627		0.117612	0.912883		0.121064	0.893425		0.117742	0.919745
0.117773	0.91515		0.118748	0.905268		0.119692	0.910904		0.120797	0.904579		0.114717	0.914549		0.116831	0.887213		0.116539	0.919873		0.119254	0.903807		0.124398	0.891742		0.118201	0.911724		0.124484	0.899638		0.114354	0.901939		0.118859	0.90936		0.122922	0.89687		0.125439	0.886426		0.122434	0.90891
0.124648	0.901655		0.126874	0.90216		0.127504	0.905749		0.127671	0.886416		0.121591	0.910743		0.123396	0.880995		0.122476	0.915188		0.123626	0.892015		0.130025	0.885404		0.126013	0.888375		0.131988	0.891475		0.121549	0.898415		0.12542	0.891397		0.130734	0.885798		0.132626	0.892802		0.129308	0.890954
0.128711	0.88422		0.133748	0.892609		0.13438	0.891958		0.132047	0.874065		0.129716	0.896048		0.131521	0.877615		0.130601	0.90088		0.128314	0.878422		0.138148	0.865263		0.131323	0.871993		0.137611	0.881002		0.129361	0.884584		0.133546	0.880517		0.137608	0.876384		0.140752	0.86825		0.137121	0.885479
0.133086	0.874135		0.13781	0.868878		0.138441	0.868079		0.137361	0.867763		0.135028	0.881806		0.137144	0.853743		0.136852	0.887716		0.135814	0.866114		0.144711	0.850466		0.135702	0.867296		0.141673	0.870123		0.134046	0.865047		0.139485	0.859541		0.141988	0.865311		0.14544	0.852641		0.142431	0.87999
0.140586	0.855217		0.143124	0.86723		0.143755	0.855824		0.145173	0.863893		0.139091	0.86625		0.140894	0.844712		0.140914	0.866634		0.143313	0.849723		0.148461	0.843208		0.142264	0.865015		0.148235	0.852872		0.138417	0.857416		0.143548	0.856073		0.146985	0.854445		0.14919	0.848903		0.146802	0.862888
0.147461	0.83806		0.15125	0.851759		0.151567	0.852311		0.15236	0.85147		0.145967	0.861754		0.146521	0.842596		0.146539	0.862159		0.148314	0.835411		0.153462	0.840764		0.150389	0.853832		0.15636	0.838585		0.145604	0.856169		0.149796	0.848662		0.154797	0.845291		0.155755	0.833369		0.153371	0.849964
0.152461	0.832752		0.158437	0.840999		0.158754	0.835662		0.157048	0.828611		0.154092	0.854301		0.154333	0.831895		0.154977	0.855203		0.15269	0.832107		0.160962	0.823861		0.156012	0.833632		0.162299	0.830686		0.15373	0.841418		0.158234	0.825528		0.162297	0.817817		0.163254	0.82075		0.161496	0.840032
0.157149	0.817818		0.162186	0.823121		0.16313	0.813146		0.161733	0.808692		0.159404	0.828255		0.160581	0.817949		0.161226	0.832413		0.159877	0.820624		0.167523	0.814246		0.160078	0.812652		0.166049	0.803312		0.158422	0.81668		0.163857	0.805052		0.166363	0.806373		0.168565	0.798229		0.167119	0.821897
0.164024	0.807209		0.166562	0.805359		0.168129	0.799568		0.169545	0.791134		0.162841	0.813004		0.164957	0.804615		0.164976	0.804582		0.168002	0.80826		0.172212	0.79415		0.166327	0.806804		0.172298	0.791977		0.161855	0.798784		0.167298	0.79053		0.170422	0.799176		0.17294	0.783653		0.171178	0.799982
0.171836	0.796091		0.174062	0.807742		0.175941	0.796857		0.177049	0.773691		0.168779	0.801017		0.170271	0.78715		0.169977	0.796895		0.17269	0.779828		0.177211	0.773814		0.174765	0.791839		0.180736	0.783289		0.168424	0.802898		0.173234	0.790009		0.177609	0.784792		0.179192	0.777168		0.177434	0.790418
0.177148	0.776394		0.181248	0.78501		0.183441	0.770658		0.18142	0.761419		0.176591	0.781812		0.178083	0.769921		0.177476	0.785226		0.17644	0.770197		0.1844	0.764362		0.180701	0.775358		0.186363	0.756433		0.176236	0.782761		0.180734	0.781016		0.184796	0.762466		0.187314	0.76778		0.185865	0.765944
0.181524	0.762481		0.185937	0.768085		0.187504	0.762164		0.185483	0.75628		0.182529	0.768161		0.18527	0.747066		0.18404	0.771215		0.183001	0.763142		0.191899	0.744247		0.184141	0.756511		0.1898	0.741903		0.181546	0.753274		0.186673	0.760207		0.189801	0.741276		0.193566	0.737322		0.191495	0.749261
0.188086	0.743877		0.190625	0.745169		0.191566	0.743738		0.192361	0.738604		0.186904	0.752636		0.189646	0.734294		0.188726	0.766107		0.190814	0.741886		0.196898	0.727023		0.189451	0.746827		0.195422	0.729564		0.185918	0.735557		0.191045	0.748143		0.194173	0.730602		0.197629	0.720732		0.194928	0.736575
0.196211	0.730785		0.197499	0.725183		0.198755	0.736203		0.199861	0.717552		0.192529	0.732667		0.194643	0.718411		0.193727	0.743136		0.196128	0.725872		0.201274	0.709459		0.197264	0.73202		0.203235	0.709955		0.192167	0.725925		0.196671	0.72801		0.201047	0.725955		0.203252	0.718657		0.200559	0.718749
0.201836	0.712901		0.205624	0.710022		0.206255	0.714635		0.205171	0.701051		0.200342	0.731892		0.201834	0.710164		0.200914	0.72741		0.200503	0.711372		0.20815	0.697477		0.203512	0.707712		0.209487	0.685548		0.199979	0.706754		0.204484	0.713839		0.209172	0.71054		0.211064	0.697201		0.208371	0.71323
0.205898	0.697414		0.210938	0.684881		0.210941	0.695038		0.209546	0.68418		0.207218	0.711865		0.209646	0.701188		0.208414	0.708895		0.206439	0.696443		0.216273	0.677646		0.207892	0.689233		0.213863	0.684897		0.206235	0.687036		0.211358	0.696456		0.214795	0.683794		0.217942	0.670772		0.214307	0.692199
0.212461	0.68581		0.215001	0.674795		0.215317	0.68008		0.216111	0.675773		0.211591	0.691892		0.214331	0.680659		0.213415	0.680721		0.214564	0.682471		0.221587	0.668059		0.213202	0.672704		0.219173	0.670306		0.210607	0.678024		0.216046	0.679674		0.218861	0.670612		0.222317	0.657064		0.218679	0.672967
0.220586	0.66748		0.221562	0.665732		0.222193	0.666501		0.224233	0.661615		0.216592	0.682661		0.218706	0.652693		0.217788	0.674677		0.220817	0.659257		0.22565	0.645032		0.221014	0.673683		0.226672	0.658746		0.21623	0.668612		0.221047	0.670899		0.22511	0.656181		0.227315	0.652308		0.224309	0.668987
0.226524	0.646325		0.23	0.656062		0.230316	0.651526		0.230172	0.637528		0.224405	0.662677		0.226206	0.644194		0.224664	0.662789		0.225188	0.639076		0.232524	0.632058		0.228201	0.657011		0.233859	0.631889		0.224042	0.649763		0.228547	0.651307		0.233235	0.644052		0.23544	0.632989		0.232122	0.651665
0.229961	0.626117		0.235623	0.633474		0.235943	0.628848		0.234235	0.617058		0.231904	0.630687		0.234331	0.624293		0.23279	0.636781		0.230815	0.624538		0.240649	0.614313		0.232886	0.627394		0.238548	0.618605		0.230924	0.630271		0.236047	0.624698		0.239171	0.625057		0.242627	0.606974		0.238996	0.62706
0.235586	0.613684		0.239373	0.608509		0.240003	0.613471		0.240483	0.613559		0.23628	0.615707		0.239019	0.608948		0.238101	0.62632		0.238627	0.613173		0.245961	0.586491		0.237578	0.610418		0.243549	0.607158		0.235295	0.616657		0.240735	0.607676		0.243237	0.600924		0.24669	0.587953		0.243368	0.601774
0.243399	0.605702		0.245938	0.603238		0.246567	0.607829		0.248609	0.599323		0.240966	0.605546		0.242769	0.598176		0.242164	0.611646		0.245501	0.597996		0.249398	0.573126		0.245077	0.600723		0.251048	0.587554		0.240293	0.605559		0.24511	0.603275		0.249173	0.592692		0.251065	0.570408		0.248365	0.598424
0.249648	0.586394		0.254372	0.586163		0.254692	0.593234		0.254861	0.571834		0.248779	0.587837		0.24933	0.584599		0.249038	0.604753		0.249877	0.578642		0.255649	0.563114		0.252577	0.581839		0.258548	0.565043		0.248418	0.588368		0.252923	0.583472		0.257611	0.575815		0.258252	0.559147		0.256177	0.592924
0.254024	0.570375		0.259999	0.560687		0.260629	0.568262		0.258924	0.555815		0.256278	0.570294		0.257143	0.566979		0.257164	0.58268		0.255191	0.569485		0.263148	0.549465		0.257574	0.557752		0.263236	0.555098		0.255605	0.567737		0.260735	0.562998		0.263547	0.551279		0.265439	0.553168		0.263685	0.559164
0.259649	0.558881		0.263436	0.537909		0.264692	0.547426		0.264546	0.539974		0.260341	0.55346		0.262457	0.541051		0.262475	0.550345		0.263316	0.552151		0.269086	0.534858		0.261954	0.540885		0.267612	0.544354		0.259359	0.543495		0.265111	0.539635		0.2673	0.535102		0.270127	0.538197		0.268369	0.545658
0.267461	0.547164		0.269063	0.538542		0.270942	0.538861		0.272672	0.525476		0.264404	0.546841		0.266832	0.532529		0.265914	0.536615		0.270503	0.526773		0.273461	0.522744		0.269141	0.535614		0.275111	0.534205		0.26373	0.543903		0.268861	0.534633		0.27261	0.533382		0.274815	0.522965		0.272741	0.536242
0.274649	0.518988		0.276875	0.51794		0.279066	0.521764		0.279233	0.505685		0.271592	0.53861		0.273394	0.523451		0.272165	0.535075		0.27394	0.521066		0.279399	0.509681		0.277266	0.51551		0.282924	0.507906		0.27123	0.533792		0.275735	0.52415		0.28011	0.513847		0.282002	0.507949		0.28024	0.523908
0.279023	0.500201		0.283124	0.500465		0.285316	0.503437		0.282983	0.498308		0.279092	0.515495		0.281206	0.50071		0.279977	0.521041		0.278628	0.50639		0.287211	0.507872		0.281637	0.495048		0.287612	0.483255		0.278417	0.506547		0.283234	0.498021		0.286671	0.486066		0.289815	0.491701		0.288053	0.50575
0.284023	0.493861		0.287499	0.485992		0.288755	0.484464		0.287984	0.48711		0.284091	0.493627		0.287458	0.48224		0.285602	0.4978		0.286128	0.496959		0.293775	0.488611		0.285391	0.488247		0.291362	0.477235		0.283109	0.486334		0.288548	0.480333		0.291363	0.471477		0.295441	0.469911		0.292745	0.480997
0.291523	0.484067		0.292813	0.47137		0.294067	0.479948		0.295484	0.471547		0.288467	0.479423		0.291521	0.472293		0.289976	0.479966		0.293002	0.476544		0.298461	0.463193		0.292265	0.484961		0.298236	0.468874		0.287793	0.476535		0.29292	0.46774		0.296361	0.467623		0.299504	0.449039		0.296491	0.466647
0.299024	0.46148		0.300626	0.470618		0.301567	0.467456		0.302358	0.464003		0.29503	0.470127		0.297457	0.461473		0.295913	0.470867		0.29769	0.463042		0.303462	0.446605		0.299765	0.461044		0.306049	0.445633		0.294667	0.464302		0.299172	0.463935		0.30386	0.460932		0.306065	0.443614		0.303365	0.460108
0.303711	0.441256		0.307812	0.44807		0.30813	0.443488		0.306733	0.43987		0.303153	0.455845		0.305269	0.445653		0.303726	0.460849		0.302379	0.442204		0.311274	0.438051		0.305075	0.4446		0.311363	0.431099		0.302793	0.454656		0.306985	0.447774		0.31136	0.433246		0.314191	0.427696		0.310865	0.444976
0.308398	0.427705		0.312188	0.426798		0.312816	0.424274		0.311734	0.421129		0.30878	0.438079		0.31183	0.418866		0.310602	0.440212		0.309566	0.432261		0.318461	0.422836		0.309454	0.425033		0.315425	0.423494		0.30811	0.428081		0.313233	0.431974		0.316045	0.415452		0.320126	0.406767		0.316182	0.423382
0.315898	0.412442		0.317185	0.410968		0.317817	0.414002		0.319234	0.409691		0.313154	0.421499		0.316206	0.406679		0.314977	0.418574		0.317378	0.423693		0.32315	0.405356		0.315703	0.410358		0.321674	0.410519		0.312169	0.417225		0.317296	0.415362		0.320737	0.403111		0.32388	0.396789		0.320554	0.40944
0.323711	0.403473		0.324685	0.399577		0.325317	0.404194		0.326734	0.391443		0.319091	0.40972		0.321833	0.400249		0.319976	0.411745		0.322692	0.404874		0.327836	0.396593		0.323828	0.402451		0.329486	0.393317		0.318731	0.404571		0.323235	0.402948		0.327924	0.391366		0.330128	0.389936		0.326803	0.407086
0.328399	0.389089		0.332188	0.383672		0.332817	0.387415		0.331735	0.379924		0.327217	0.392137		0.329958	0.38855		0.327789	0.40113		0.326751	0.385668		0.335649	0.383176		0.330076	0.38369		0.335735	0.375129		0.326856	0.386711		0.331361	0.390812		0.335736	0.377482		0.338566	0.370961		0.334615	0.384579
0.332149	0.373473		0.337186	0.366239		0.337505	0.366391		0.336423	0.36767		0.333467	0.377952		0.336832	0.377141		0.334976	0.373001		0.333316	0.372685		0.343148	0.365325		0.334135	0.367169		0.34011	0.361195		0.332792	0.368723		0.337922	0.37537		0.340733	0.359455		0.344502	0.349491		0.340871	0.364198
0.339024	0.367895		0.341561	0.361416		0.341879	0.350842		0.343297	0.356452		0.33753	0.361856		0.340582	0.355175		0.339664	0.359792		0.341441	0.358147		0.347211	0.35203		0.339766	0.358338		0.345737	0.347025		0.336858	0.358177		0.341985	0.356395		0.345113	0.348262		0.347939	0.334792		0.34493	0.350769
0.346523	0.350439		0.349061	0.351228		0.349378	0.342316		0.35111	0.341533		0.343467	0.354369		0.34527	0.341677		0.344352	0.357051		0.347377	0.340544		0.351274	0.338952		0.347891	0.353758		0.353862	0.336913		0.343106	0.346984		0.347607	0.34588		0.352299	0.341689		0.353566	0.335028		0.350866	0.342995
0.351836	0.328332		0.356873	0.325955		0.357191	0.330851		0.356423	0.32697		0.351592	0.340481		0.35277	0.330879		0.352165	0.342906		0.351439	0.321048		0.358462	0.324916		0.354765	0.332737		0.360423	0.321886		0.351232	0.331322		0.356046	0.330693		0.360112	0.321232		0.361378	0.31822		0.358991	0.336295
0.356211	0.314115		0.361249	0.311295		0.362192	0.314022		0.360486	0.316156		0.358154	0.321586		0.359957	0.31765		0.359664	0.326928		0.358001	0.31736		0.365649	0.31001		0.358824	0.311985		0.364486	0.301972		0.356855	0.30925		0.362611	0.306114		0.365109	0.300125		0.367314	0.300278		0.365247	0.322525
0.362773	0.30631		0.365311	0.298084		0.366567	0.305188		0.36736	0.306331		0.361591	0.305718		0.364332	0.301176		0.363727	0.312734		0.366126	0.305079		0.370961	0.293227		0.364142	0.306812		0.370113	0.29095		0.360608	0.301378		0.366048	0.294138		0.36855	0.291869		0.371689	0.285478		0.369619	0.300104
0.370586	0.292711		0.371873	0.292717		0.373754	0.291674		0.375485	0.286675		0.366592	0.297229		0.369333	0.28834		0.36779	0.29788		0.371753	0.284151		0.375337	0.281164		0.372267	0.291112		0.378234	0.282263		0.366231	0.298698		0.371045	0.288588		0.375111	0.279824		0.377316	0.272417		0.375242	0.287706
0.376836	0.275193		0.379685	0.279669		0.381567	0.27086		0.380796	0.263383		0.374404	0.285874		0.37652	0.279899		0.374977	0.282756		0.375503	0.275609		0.382211	0.270606		0.379141	0.273284		0.385112	0.266804		0.374044	0.289717		0.378545	0.275882		0.382924	0.268239		0.384816	0.261907		0.383367	0.274575
0.380899	0.262384		0.384999	0.262679		0.386566	0.256316		0.384236	0.251949		0.380967	0.268684		0.384333	0.267959		0.382164	0.269468		0.381129	0.269634		0.390023	0.258869		0.382887	0.259901		0.388862	0.25412		0.380292	0.272735		0.385423	0.261159		0.388547	0.253044		0.392003	0.24516		0.389928	0.261169
0.386836	0.254559		0.389062	0.249553		0.390318	0.250936		0.390485	0.248308		0.385341	0.257303		0.389334	0.251352		0.387165	0.255498		0.388629	0.253077		0.39565	0.241618		0.387579	0.256543		0.39355	0.249743		0.384671	0.253834		0.390111	0.244169		0.392926	0.244047		0.396691	0.224434		0.393682	0.237871
0.394649	0.243312		0.39531	0.241798		0.396879	0.24269		0.398297	0.240899		0.390342	0.245886		0.393705	0.236444		0.391538	0.241065		0.394877	0.234924		0.400023	0.226403		0.395079	0.243297		0.40105	0.236344		0.389981	0.244141		0.394795	0.233761		0.398862	0.229963		0.401379	0.217383		0.398679	0.231291
0.401211	0.220252		0.403435	0.228466		0.404379	0.227763		0.404233	0.22247		0.397842	0.235182		0.40027	0.222567		0.398414	0.239111		0.399253	0.222989		0.405961	0.219812		0.401953	0.226291		0.407924	0.212139		0.397481	0.236439		0.401982	0.230409		0.406987	0.215197		0.408879	0.210949		0.406179	0.227417
0.405586	0.209637		0.409688	0.210085		0.410003	0.21183		0.408296	0.204305		0.405342	0.223244		0.408396	0.209851		0.406227	0.221293		0.404567	0.213542		0.414086	0.207575		0.406637	0.212771		0.412612	0.198077		0.404668	0.220611		0.409795	0.214498		0.413235	0.203774		0.416379	0.193512		0.413053	0.210041
0.410898	0.20291		0.41375	0.200593		0.414379	0.196837		0.414235	0.198459		0.410343	0.205321		0.413706	0.196362		0.411851	0.202856		0.412688	0.20313		0.420337	0.192738		0.41133	0.201256		0.417297	0.189853		0.40936	0.202664		0.414796	0.194661		0.417607	0.187824		0.42138	0.182984		0.417745	0.1961
0.419024	0.189574		0.419686	0.192394		0.420316	0.193618		0.422048	0.187212		0.414716	0.189101		0.418081	0.180268		0.416227	0.19598		0.419879	0.186021		0.424399	0.180897		0.418516	0.195446		0.424487	0.186429		0.414045	0.194087		0.419171	0.185881		0.422925	0.181784		0.425751	0.174292		0.422429	0.190549
0.425899	0.174657		0.427811	0.1735		0.428442	0.178585		0.428922	0.168978		0.421905	0.180584		0.424646	0.175598		0.422477	0.187953		0.424254	0.171523		0.430337	0.173771		0.426329	0.179139		0.4323	0.169795		0.421544	0.185678		0.426045	0.181605		0.430737	0.169014		0.433255	0.163744		0.429616	0.179059
0.429649	0.153143		0.434373	0.163198		0.434692	0.163769		0.433297	0.155949		0.429717	0.16357		0.432768	0.161689		0.430601	0.17485		0.428939	0.164278		0.438462	0.162184		0.431639	0.159498		0.437297	0.155193		0.429044	0.166153		0.434171	0.168208		0.437611	0.150585		0.441067	0.148923		0.437429	0.165075
0.434336	0.151188		0.438435	0.151658		0.439068	0.147242		0.438611	0.149239		0.435029	0.145673		0.438394	0.149313		0.436851	0.156315		0.436439	0.158223		0.444711	0.145987		0.435698	0.152137		0.441673	0.142233		0.434049	0.150054		0.439484	0.152467		0.441983	0.144		0.445752	0.132354		0.442434	0.148872
0.442148	0.148199		0.444062	0.144677		0.44438	0.139773		0.446424	0.139467		0.439092	0.144098		0.441831	0.139522		0.440914	0.146664		0.443938	0.142381		0.448461	0.134452		0.44258	0.144122		0.448238	0.131467		0.43842	0.145768		0.443547	0.13742		0.447301	0.135788		0.449502	0.123731		0.446805	0.137011
0.449023	0.13196		0.452187	0.126646		0.452505	0.133334		0.45361	0.125259		0.446279	0.137094		0.447771	0.135735		0.446538	0.138718		0.448939	0.126973		0.453462	0.125066		0.450697	0.133466		0.456359	0.120575		0.44592	0.137274		0.450421	0.130783		0.455113	0.127523		0.45638	0.120268		0.453367	0.130381
0.453399	0.117948		0.458749	0.115408		0.459379	0.121509		0.457986	0.112239		0.454404	0.127331		0.455583	0.122313		0.454664	0.128779		0.453315	0.119727		0.461274	0.119038		0.456328	0.121736		0.461673	0.107133		0.453733	0.125595		0.458859	0.116204		0.4623	0.109495		0.463879	0.107545		0.461492	0.117764
0.458398	0.112148		0.462498	0.105675		0.463754	0.110068		0.462983	0.105081		0.459403	0.113087		0.461519	0.107272		0.461227	0.113062		0.460814	0.115386		0.467837	0.106016		0.460387	0.111832		0.465736	0.099621		0.458104	0.110004		0.464173	0.105199		0.466046	0.0974912		0.469189	0.100333		0.46681	0.105143
0.465586	0.102896		0.467187	0.0989956		0.468754	0.103373		0.470796	0.0996636		0.463153	0.106852		0.465895	0.10046		0.464664	0.103051		0.468627	0.102437		0.472211	0.0940596		0.466948	0.104887		0.47261	0.0973941		0.461858	0.0995706		0.46761	0.0958816		0.470738	0.0924702		0.473252	0.090032		0.470868	0.0958578
0.473398	0.0916627		0.474686	0.0906763		0.476879	0.0942378		0.478295	0.0895361		0.469404	0.0982176		0.471521	0.093157		0.469976	0.0995368		0.473315	0.0889524		0.477212	0.0875066		0.475073	0.0924092		0.480735	0.0867093		0.468732	0.0959875		0.473546	0.0930784		0.477925	0.0880499		0.479817	0.0835705		0.477743	0.0930611
0.478399	0.0826686		0.481873	0.0821022		0.483755	0.0819045		0.482358	0.0774366		0.476903	0.0850251		0.479334	0.0855961		0.477476	0.0923994		0.477065	0.0812177		0.484712	0.0831133		0.480704	0.0794436		0.486362	0.0741744		0.476232	0.0861402		0.481358	0.0861663		0.485112	0.0767899		0.48763	0.0740564		0.485868	0.0854243
0.482461	0.0752833		0.486562	0.0746765		0.487818	0.0706975		0.486421	0.0719354		0.482841	0.0755318		0.486208	0.0743013		0.484039	0.0788782		0.483626	0.0793471		0.492211	0.0745691		0.484137	0.074698		0.489799	0.069632		0.481542	0.0811278		0.487298	0.0777463		0.489796	0.068362		0.493878	0.0645509		0.491491	0.0739361
0.489336	0.0699777		0.49125	0.0700313		0.492191	0.0668955		0.493611	0.0688604		0.487216	0.0679256		0.490583	0.0669011		0.488414	0.0715599		0.491126	0.070944		0.497212	0.064703		0.490073	0.0708867		0.495735	0.0657722		0.485921	0.0727363		0.491361	0.0700055		0.494488	0.0651492		0.498254	0.0590063		0.494932	0.0661386
0.497461	0.0640047		0.498437	0.0647083		0.499693	0.0607171		0.501111	0.0612823		0.492841	0.0643172		0.495581	0.0637739		0.493413	0.0670898		0.49644	0.0634599		0.501586	0.0567753		0.497885	0.0628891		0.503547	0.0599901		0.492482	0.0670531		0.497296	0.0617154		0.501363	0.0580192		0.503876	0.0550995		0.500867	0.0616395
0.502774	0.0538046		0.506249	0.0578211		0.506567	0.0557245		0.506108	0.0531227		0.500654	0.0592716		0.503393	0.0579453		0.500913	0.0629103		0.500815	0.0573154		0.508775	0.0552892		0.503828	0.0536665		0.509486	0.0507129		0.500295	0.0605198		0.505109	0.0573763		0.509488	0.050481		0.511689	0.0476202		0.50868	0.0548342
0.506836	0.0488627		0.511563	0.0500878		0.511566	0.0495169		0.510484	0.0481185		0.50753	0.0530409		0.510584	0.0494048		0.508726	0.056125		0.507377	0.052625		0.516587	0.0488145		0.5082	0.0474085		0.513862	0.0434713		0.506543	0.0476362		0.51167	0.0487216		0.514798	0.0430083		0.518567	0.0403823		0.514615	0.0465028
0.513711	0.0453914		0.515935	0.0459347		0.516254	0.0447579		0.517358	0.0466131		0.511905	0.0447096		0.515268	0.0432994		0.513727	0.0463529		0.515189	0.0468377		0.521899	0.0397783		0.51351	0.0445247		0.519485	0.04008		0.51061	0.0432962		0.516045	0.0418507		0.518857	0.0401742		0.522629	0.0369635		0.518682	0.0445116
0.521837	0.0381178		0.5225	0.0421036		0.52313	0.0401749		0.525483	0.0399281		0.516904	0.0409768		0.519957	0.0382612		0.518102	0.0413055		0.521441	0.0397523		0.525962	0.0370721		0.521322	0.0410756		0.527297	0.0374916		0.516545	0.0416044		0.521359	0.0395233		0.525426	0.0379835		0.528252	0.0370981		0.524305	0.0387276
0.527461	0.0338569		0.530625	0.0374847		0.530943	0.0354256		0.53111	0.0341433		0.52503	0.0374102		0.527769	0.0380552		0.524976	0.0386888		0.525504	0.0344149		0.533149	0.03424		0.528517	0.0357228		0.534175	0.0328851		0.524358	0.0400694		0.528859	0.0361109		0.533551	0.0344424		0.536378	0.032043		0.53243	0.0359344
0.530898	0.031309		0.536248	0.0341906		0.536255	0.0309139		0.535172	0.0318072		0.532216	0.0328889		0.535269	0.0323064		0.533102	0.0357245		0.53144	0.0308538		0.540961	0.0309719		0.532889	0.0309152		0.53886	0.0271618		0.530919	0.0336726		0.536359	0.0315994		0.539487	0.0305575		0.542939	0.0285541		0.539304	0.0306425
0.536836	0.0288733		0.540311	0.0329527		0.54063	0.0270043		0.541421	0.0314446		0.536592	0.0304974		0.539644	0.028194		0.538101	0.0323389		0.539252	0.027758		0.545962	0.0280875		0.537886	0.0291953		0.543861	0.0246669		0.535299	0.0285038		0.541047	0.0264013		0.543233	0.0254893		0.546689	0.0250538		0.543683	0.0288152
0.544648	0.0249371		0.546876	0.0300692		0.547191	0.0243449		0.549546	0.027642		0.541278	0.0288428		0.543707	0.0260982		0.542163	0.0280203		0.546126	0.0247695		0.549712	0.0235636		0.545386	0.0258733		0.55136	0.0231105		0.540609	0.0261151		0.545735	0.0234024		0.549802	0.0228743		0.551377	0.0231021		0.548681	0.0253983
0.550586	0.0214365		0.554997	0.0256648		0.555317	0.0219805		0.555486	0.0225933		0.549404	0.0262761		0.550581	0.0243568		0.549352	0.0260378		0.550189	0.0224026		0.555961	0.0227085		0.552885	0.0226862		0.558547	0.0204109		0.548734	0.0254662		0.553235	0.0243666		0.558232	0.0201287		0.558877	0.0213479		0.556493	0.0221868
0.554649	0.0195762		0.560624	0.0216655		0.560941	0.0189655		0.559548	0.0199583		0.556903	0.0217932		0.557768	0.0214181		0.557476	0.0236815		0.555816	0.0202907		0.563773	0.0213832		0.557577	0.0215792		0.563236	0.0179495		0.555608	0.0239426		0.560735	0.0209208		0.563863	0.018777		0.566067	0.0197592		0.56368	0.0187407
0.560273	0.0189079		0.564061	0.0194404		0.565317	0.017307		0.565797	0.0187303		0.560655	0.0197638		0.563082	0.0195851		0.562477	0.0202555		0.563941	0.0185161		0.5694	0.0191299		0.562262	0.0195181		0.567924	0.0168964		0.559354	0.0202485		0.56511	0.0165453		0.567296	0.017337		0.570439	0.0179697		0.568372	0.0167433
0.568399	0.0158373		0.57	0.0175535		0.571567	0.0158163		0.573922	0.0171872		0.564716	0.0197579		0.567457	0.0177228		0.565914	0.0179124		0.570502	0.0155947		0.573773	0.0177075		0.569762	0.0162842		0.575736	0.0145389		0.564046	0.0175994		0.569486	0.0160966		0.572926	0.0164017		0.575127	0.0148563		0.573057	0.015343
0.575274	0.0141827		0.577813	0.0179958		0.579693	0.0137477		0.580171	0.0141766		0.571905	0.0168515		0.574018	0.0148206		0.572477	0.0173911		0.574252	0.0140005		0.579711	0.0145078		0.577574	0.0151545		0.583236	0.0135094		0.571546	0.0159408		0.57636	0.0155237		0.580739	0.0151871		0.582627	0.0138828		0.580869	0.0157281
0.579648	0.0121308		0.583749	0.0147949		0.58563	0.012455		0.583608	0.0121525		0.579404	0.0147521		0.582144	0.014502		0.579977	0.0170509		0.579253	0.0141244		0.587523	0.0126257		0.581953	0.0125301		0.587611	0.013126		0.57842	0.0136893		0.583547	0.01446		0.586987	0.012324		0.590439	0.0122463		0.588369	0.0136722
0.584648	0.0119234		0.588124	0.0131819		0.589067	0.0118973		0.588922	0.012379		0.584092	0.0131802		0.588083	0.0126187		0.585601	0.0154602		0.586753	0.0136386		0.594087	0.0116537		0.585699	0.0114852		0.591674	0.0110842		0.582792	0.0135508		0.58886	0.0129945		0.591359	0.0118217		0.595441	0.0100265		0.59274	0.011722
0.592461	0.010162		0.593751	0.0113849		0.594692	0.0115767		0.596421	0.012537		0.588466	0.0116505		0.592146	0.0122153		0.589977	0.0123387		0.593627	0.0117292		0.598462	0.010212		0.592573	0.011526		0.598548	0.00963902		0.587796	0.0129548		0.593236	0.012563		0.596677	0.0112253		0.599816	0.0101697		0.596807	0.011031
0.599962	0.00994608		0.601563	0.0119212		0.602504	0.010021		0.602986	0.0122172		0.595342	0.0109659		0.598082	0.0123211		0.595914	0.011248		0.598315	0.0111299		0.603774	0.00888817		0.600073	0.010394		0.606048	0.00982784		0.594983	0.0123417		0.599797	0.0108612		0.604489	0.0107921		0.606377	0.0101427		0.603681	0.010582
0.604649	0.00961622		0.60875	0.0108327		0.608755	0.00908399		0.607671	0.00975335		0.603467	0.0087509		0.606207	0.00946002		0.603727	0.0111204		0.603003	0.00978505		0.611587	0.00979295		0.605391	0.00983125		0.611049	0.00947617		0.602796	0.0107161		0.607922	0.0108091		0.611676	0.00917815		0.614503	0.00926222		0.610868	0.00974588
0.609336	0.00839727		0.613126	0.0099622		0.613128	0.00792139		0.612672	0.0083554		0.609092	0.00843759		0.612768	0.00933424		0.610601	0.009221		0.61019	0.00942355		0.618773	0.00828404		0.609762	0.00880715		0.615424	0.00899906		0.607793	0.00966144		0.613545	0.00815		0.616048	0.0081488		0.620129	0.00746509		0.616178	0.00934663
0.617149	0.00769369		0.61781	0.009437		0.618442	0.00790062		0.620484	0.00826731		0.613155	0.00752685		0.616831	0.00906013		0.614976	0.00802979		0.618003	0.00886364		0.623149	0.00628099		0.616324	0.00717138		0.621986	0.00715356		0.612172	0.00814729		0.617608	0.00663003		0.621045	0.00720391		0.624192	0.00714583		0.620557	0.00899327
0.624648	0.00736995		0.625623	0.00928387		0.626255	0.00691769		0.627984	0.00828507		0.619403	0.00763375		0.62277	0.00847302		0.620288	0.00907962		0.623004	0.00814453		0.627837	0.00662857		0.624136	0.00628446		0.630111	0.00607214		0.619046	0.00886964		0.62386	0.00729658		0.628232	0.00734989		0.630753	0.00731119		0.627118	0.00791921
0.629024	0.00603607		0.633122	0.00874094		0.633442	0.00555599		0.632672	0.00774974		0.627529	0.00740535		0.630896	0.00805436		0.627788	0.00820605		0.627379	0.00638684		0.635961	0.00619468		0.63008	0.00676704		0.636047	0.00529178		0.627172	0.00709686		0.631986	0.00618514		0.635739	0.00701994		0.638879	0.00736331		0.634931	0.00654249
0.633086	0.00571607		0.63781	0.00878105		0.63813	0.00576881		0.637048	0.00637546		0.633779	0.00575122		0.637457	0.00621039		0.634977	0.00682981		0.633941	0.00646806		0.643149	0.00523781		0.634138	0.0061808		0.640109	0.0053129		0.632482	0.00632673		0.638234	0.00567091		0.640736	0.00689578		0.644501	0.00527771		0.640867	0.00601693
0.639961	0.00484178		0.642499	0.00902016		0.642816	0.0061691		0.644547	0.00587632		0.637842	0.00640107		0.641207	0.00516598		0.639352	0.00665167		0.642066	0.00632186		0.646899	0.0055798		0.640074	0.0046934		0.646049	0.00481533		0.636548	0.00598293		0.641984	0.00566332		0.645108	0.00624221		0.648251	0.00537297		0.644933	0.00597016
0.647461	0.00421198		0.649998	0.00729786		0.650005	0.00507605		0.65236	0.00562823		0.643779	0.00587066		0.646208	0.00559022		0.644351	0.00516454		0.647689	0.00552218		0.651275	0.00420842		0.648199	0.00475893		0.654174	0.0045946		0.64311	0.00591545		0.647923	0.00520684		0.652608	0.00500402		0.654191	0.00464324		0.651182	0.00550448
0.652773	0.00422559		0.657498	0.00670019		0.657818	0.00454962		0.657361	0.00578163		0.651904	0.00521526		0.653707	0.00445645		0.652164	0.00600094		0.651751	0.00447254		0.658462	0.00486807		0.654761	0.00432895		0.660423	0.00385957		0.651548	0.00504975		0.656045	0.00418617		0.660107	0.00460337		0.66169	0.00444329		0.659307	0.00491927
0.657149	0.00348324		0.661874	0.00572935		0.662504	0.00401824		0.661424	0.00456872		0.658155	0.00395852		0.660582	0.00422456		0.659664	0.00510544		0.658629	0.00370232		0.665648	0.00413675		0.658827	0.00360947		0.664485	0.0030737		0.656858	0.00480749		0.66261	0.00410789		0.664799	0.0047247		0.66763	0.00465088		0.665555	0.00490353
0.663711	0.00469555		0.665936	0.00611937		0.666879	0.00437452		0.668611	0.00298505		0.661905	0.0049515		0.66527	0.00406996		0.663414	0.00452801		0.666751	0.00444503		0.670649	0.00388666		0.66445	0.00398072		0.670112	0.00277793		0.660299	0.00482696		0.66636	0.00413844		0.668545	0.00405738		0.672002	0.00393104		0.669622	0.00425669
0.671836	0.00440888		0.67281	0.00556602		0.674379	0.00319592		0.676736	0.00318602		0.666904	0.00501235		0.670271	0.00288905		0.667789	0.0047074		0.672065	0.00484206		0.675023	0.00307162		0.672888	0.00441771		0.67855	0.00312124		0.666234	0.00504377		0.671361	0.00383918		0.675107	0.00338417		0.677628	0.0028178		0.675245	0.00456197
0.677774	0.00338037		0.68031	0.00547694		0.682192	0.00230729		0.68142	0.00348282		0.674716	0.00463962		0.677771	0.00325275		0.674976	0.00482727		0.675815	0.00479809		0.681899	0.00264699		0.679449	0.00378107		0.684799	0.00392603		0.674047	0.00451435		0.678861	0.00401111		0.682919	0.00336715		0.685441	0.00246327		0.68337	0.00245144
0.681836	0.00256354		0.685624	0.00548071		0.68688	0.00275523		0.68517	0.00340316		0.68128	0.00344374		0.68527	0.0028093		0.682165	0.00444238		0.681441	0.00339171		0.689712	0.00129089		0.68289	0.00303769		0.688548	0.00293242		0.679982	0.00320861		0.685422	0.00230203		0.688237	0.0031786		0.692315	0.00260774		0.689931	0.00278578
0.688086	0.00305918		0.689999	0.00622508		0.69063	0.00371701		0.691422	0.00274242		0.685655	0.00228116		0.690271	0.00317412		0.686851	0.00428847		0.689254	0.00302999		0.695336	0.00244232		0.687887	0.00343634		0.693549	0.00290601		0.684354	0.00288627		0.69011	0.00215262		0.692296	0.00248292		0.69669	0.00275984		0.693372	0.00311882
0.696211	0.00363133		0.696561	0.00565511		0.697504	0.00278571		0.699235	0.00168109		0.690654	0.0028422		0.694956	0.00340668		0.691539	0.0036179		0.695502	0.00186578		0.699399	0.00225293		0.695387	0.00258974		0.701049	0.00243726		0.689985	0.00338737		0.695107	0.0029561		0.698857	0.00296889		0.701691	0.00240801		0.698369	0.00294116
0.702461	0.003067		0.704373	0.00514564		0.705003	0.00181649		0.704858	0.00222097		0.698467	0.00357675		0.701834	0.00344779		0.698413	0.0039773		0.699878	0.00192664		0.705962	0.00188856		0.702261	0.00188692		0.70761	0.00201935		0.697797	0.00352321		0.702611	0.00287158		0.70667	0.00238734		0.709504	0.00235274		0.706182	0.00244313
0.706523	0.0020169		0.710313	0.00511063		0.710317	0.00186012		0.709233	0.00227697		0.705966	0.00384833		0.709646	0.003236		0.706226	0.00421997		0.705192	0.00245406		0.714086	0.0024124		0.70664	0.0030732		0.712299	0.00158868		0.704984	0.00265463		0.710111	0.00132864		0.712926	0.00259094		0.717004	0.00255157		0.712743	0.00223291
0.712149	0.00239402		0.714375	0.00606729		0.714691	0.00178048		0.715173	0.00215838		0.710655	0.00319087		0.714956	0.00240494		0.711851	0.00354376		0.713004	0.00203278		0.720023	0.0013787		0.711638	0.00259698		0.7173	0.00168375		0.709356	0.00138937		0.714795	0.00240908		0.717297	0.00347277		0.721379	0.00336622		0.717428	0.00225433
0.720273	0.00217774		0.720624	0.00580093		0.720941	0.00167055		0.723298	0.00245199		0.71503	0.0027464		0.719019	0.00171574		0.715913	0.00303963		0.720191	0.0017421		0.723775	0.00144499		0.718825	0.00139733		0.724487	0.00210562		0.714048	0.00159557		0.719483	0.00207279		0.72292	0.00299923		0.726067	0.0032786		0.722432	0.00156946
0.726836	0.00328719		0.728749	0.00579827		0.729067	0.00238808		0.729859	0.00332258		0.72253	0.00343757		0.725893	0.00141124		0.722476	0.00349761		0.724566	0.00199574		0.730023	0.00202716		0.726637	0.000938856		0.731986	0.00172248		0.72186	0.000839597		0.726357	0.0015784		0.730733	0.00186644		0.73388	0.00158055		0.729619	0.00134001
0.730273	0.00359886		0.734998	0.00530209		0.735317	0.00234597		0.733922	0.00341454		0.730342	0.00286194		0.734018	0.00215852		0.730602	0.00270214		0.729564	0.00193726		0.738461	0.00192988		0.731642	0.00162262		0.736987	0.00139568		0.72936	0.00130707		0.73417	0.00145642		0.737607	0.00277795		0.741379	0.00107976		0.737119	0.00151439
0.735274	0.00216941		0.73906	0.00447861		0.73938	0.00160482		0.739549	0.00227378		0.735341	0.00269562		0.739332	0.00254635		0.736539	0.0018457		0.737376	0.00127923		0.744399	0.00200499		0.736014	0.00116831		0.741672	0.00239721		0.733731	0.00112942		0.739484	0.00155922		0.741673	0.00316988		0.745755	0.00131634		0.742116	0.00139683
0.743086	0.00201877		0.745	0.00528304		0.745004	0.00150269		0.747361	0.0021709		0.739404	0.00206715		0.742769	0.00258478		0.740602	0.00288342		0.744567	0.0012697		0.748149	0.00117919		0.742888	0.000783037		0.74855	0.00227023		0.738424	0.00147344		0.743546	0.001784		0.746983	0.00195919		0.749814	0.00138082		0.746808	0.00262473
0.749648	0.00227143		0.753125	0.00549223		0.75313	0.000949973		0.754235	0.00253279		0.746591	0.00197381		0.749021	0.00240226		0.74685	0.00274203		0.749251	0.0015998		0.753461	0.00117682		0.751013	0.00153517		0.756362	0.00143991		0.746236	0.00168583		0.750733	0.00135495		0.755109	0.00224287		0.756692	0.00205303		0.753682	0.00214681
0.754336	0.0020135		0.759686	0.00519639		0.760004	0.000957975		0.758611	0.00146282		0.754716	0.00206201		0.756521	0.00149569		0.754976	0.00163812		0.75394	0.00190585		0.760961	0.00102725		0.756323	0.00218672		0.761672	0.00147908		0.753736	0.00220021		0.758859	0.00145865		0.761983	0.00228281		0.764191	0.00163447		0.761495	0.00175477
0.759336	0.00238926		0.763123	0.00408881		0.764066	0.0016374		0.763921	0.000914063		0.759717	0.00296617		0.762457	0.00129239		0.761226	0.00166944		0.761439	0.00218916		0.767524	0.00107115		0.76039	0.00104821		0.765735	0.00188643		0.758107	0.00156127		0.76386	0.00195594		0.765736	0.00225989		0.769192	0.00103797		0.766805	0.00191648
0.766836	0.00244979		0.768124	0.00438421		0.769378	0.00110525		0.771733	0.00148148		0.763154	0.00270035		0.766832	0.000967784		0.764663	0.00141633		0.769252	0.00223053		0.772212	0.00075779		0.767264	0.00108481		0.772613	0.00112015		0.762174	0.00145154		0.767609	0.00153447		0.770734	0.00186033		0.773877	0.00141946		0.770872	0.00135006
0.774336	0.00166595		0.775937	0.00427851		0.777504	0.00115441		0.77892	0.00155159		0.769718	0.00248736		0.772768	0.000736561		0.770288	0.00174525		0.773627	0.00172932		0.777211	0.000662878		0.775702	0.00173899		0.780734	0.000464345		0.769048	0.00205043		0.773858	0.000948644		0.77792	0.00154609		0.780129	0.00170299		0.777746	0.000993862
0.779336	0.00163943		0.782498	0.00426787		0.784693	0.00158729		0.782983	0.00112665		0.77753	0.0015425		0.78058	0.00143715		0.77779	0.00205579		0.77769	0.00170268		0.784711	0.00154808		0.781012	0.00124589		0.786048	0.00104247		0.776548	0.0018668		0.781358	0.00123542		0.784795	0.00206961		0.787942	0.00102539		0.786184	0.00192938
0.783711	0.00175352		0.787186	0.00449767		0.788442	0.00176353		0.787358	0.00182767		0.783155	0.00209305		0.787458	0.00166369		0.784351	0.00273472		0.784564	0.00181271		0.792211	0.000568827		0.784453	0.000530572		0.789485	0.00122182		0.781545	0.0015626		0.787297	0.00127311		0.789487	0.00277751		0.79419	0.00122714		0.791181	0.00157908
0.790586	0.00158213		0.791875	0.004101		0.793129	0.000821747		0.794545	0.00141457		0.787528	0.00183011		0.791521	0.00153366		0.788414	0.00273243		0.792064	0.00100762		0.796899	0.000934486		0.790388	0.000719045		0.795738	0.0010977		0.785917	0.0020064		0.79136	0.00117098		0.794171	0.00258701		0.798253	0.00130061		0.794622	0.000690764
0.798398	0.00151888		0.799374	0.00548514		0.800628	0.00142286		0.801736	0.00198836		0.793466	0.0024483		0.796831	0.00126513		0.793725	0.00362416		0.797378	0.000847766		0.801587	0.00121599		0.798201	0.000714223		0.80355	0.00137279		0.792485	0.00156526		0.797295	0.00151284		0.801358	0.00186361		0.804192	0.00176747		0.80087	0.000653615
0.803711	0.00189328		0.806874	0.00488747		0.807504	0.00100027		0.806733	0.00171956		0.801278	0.00240842		0.804644	0.00182007		0.801227	0.00277419		0.801753	0.000694198		0.808774	0.00112797		0.804137	0.000954635		0.809173	0.00146522		0.800611	0.00165419		0.805421	0.001369		0.80917	0.00228564		0.812314	0.00207639		0.808683	0.00116213
0.808086	0.00196266		0.811875	0.00562918		0.812193	0.00036086		0.811109	0.0016053		0.807842	0.00221599		0.81183	0.00201398		0.808727	0.00229199		0.808314	0.00112566		0.816586	0.000575499		0.808516	0.000643437		0.813861	0.000682214		0.806234	0.00191702		0.811986	0.0012294		0.814488	0.00260556		0.818879	0.00167266		0.814306	0.00136711
0.814961	0.002233		0.816251	0.00528969		0.816879	0.000771257		0.817983	0.00149719		0.811904	0.00228055		0.816206	0.00229927		0.813413	0.00235882		0.81644	0.0020553		0.821586	0.000511794		0.814139	0.000972167		0.819488	0.000928251		0.810605	0.00173959		0.816045	0.00145129		0.81886	0.00170823		0.822629	0.00191957		0.818677	0.00166911
0.823086	0.00270603		0.823437	0.00507229		0.824066	0.000937398		0.826108	0.00132967		0.817216	0.00212204		0.821207	0.00158549		0.818101	0.00245885		0.822066	0.00202043		0.825961	0.000426351		0.821951	0.00113851		0.8273	0.00162015		0.816549	0.00155309		0.821359	0.00171376		0.825421	0.00162574		0.828564	0.00162773		0.824621	0.00147091
0.828086	0.00257425		0.83125	0.00419164		0.831878	0.000998367		0.831735	0.00107066		0.825342	0.00194051		0.829019	0.00148675		0.825288	0.00349385		0.826442	0.00153352		0.83315	0.00115875		0.828825	0.00095069		0.834174	0.00139656		0.824674	0.00144313		0.829171	0.000661866		0.833546	0.00203556		0.837002	0.00140531		0.832746	0.00208606
0.831836	0.00189788		0.83656	0.00522852		0.837192	0.000836418		0.835797	0.00175029		0.832218	0.00208503		0.836519	0.00099906		0.833101	0.00282766		0.832377	0.00115339		0.840962	0.00122288		0.833205	0.00119833		0.83855	0.000726007		0.830922	0.00203671		0.836358	0.00105769		0.839169	0.00169121		0.843564	0.00143317		0.839307	0.00135159
0.838086	0.0015017		0.840935	0.00505899		0.841566	0.00109611		0.842359	0.00103606		0.836591	0.00266519		0.840269	0.00195277		0.838102	0.00224667		0.840503	0.00205855		0.845962	0.000365444		0.838202	0.000909051		0.84386	0.00147116		0.835294	0.00240131		0.840733	0.00111567		0.843236	0.0018348		0.847005	0.00147563		0.843679	0.00154914
0.845586	0.00156972		0.847813	0.00533777		0.848129	0.00175991		0.850484	0.00163694		0.841592	0.00263271		0.844644	0.00192685		0.842477	0.00245989		0.846751	0.00206657		0.849399	0.000534607		0.846014	0.00148477		0.85136	0.000726227		0.840917	0.00186127		0.845734	0.00170774		0.849797	0.00211609		0.852002	0.000687713		0.848997	0.00132275
0.851524	0.00183717		0.855935	0.00461579		0.856254	0.00137618		0.856423	0.00146646		0.849717	0.00246989		0.851831	0.00147737		0.849664	0.00222453		0.851127	0.00128768		0.855962	0.00141271		0.853201	0.00113763		0.85855	0.000514741		0.849042	0.00174733		0.853547	0.00190799		0.857922	0.00174991		0.859502	0.00175983		0.856809	0.00189048
0.855898	0.00102817		0.861249	0.00504105		0.861879	0.00101475		0.860173	0.00134788		0.856904	0.00262716		0.859331	0.00140878		0.85779	0.00182837		0.856753	0.000994187		0.863461	0.00129627		0.857886	0.000845277		0.863235	0.000443659		0.855611	0.00179158		0.861047	0.00105635		0.863545	0.00194893		0.866379	0.00169513		0.863683	0.00147965
0.861836	0.00139986		0.864686	0.00606197		0.865942	0.00123138		0.866422	0.00170181		0.860967	0.00261339		0.864332	0.00145726		0.862476	0.00244444		0.864879	0.000872025		0.869086	0.00104726		0.862578	0.000666447		0.867923	0.00139964		0.859044	0.00221702		0.865109	0.0012158		0.866986	0.00192209		0.871064	0.00209392		0.868055	0.0013175
0.869648	0.0016379		0.870938	0.00521966		0.872816	0.00109858		0.87486	0.00173276		0.865342	0.00200218		0.868708	0.00133193		0.866226	0.00214371		0.87144	0.00174318		0.873462	0.00134254		0.87039	0.00143458		0.875736	0.00150681		0.864042	0.00124557		0.869172	0.00180586		0.872922	0.00137959		0.875752	0.00217075		0.87306	0.00163524
0.876523	0.00110451		0.878438	0.00492027		0.880941	0.00176677		0.880795	0.00141138		0.872529	0.00290922		0.875582	0.000761806		0.872789	0.00278317		0.87519	0.00200397		0.879712	0.0018029		0.87789	0.00127964		0.883235	0.0010889		0.871854	0.00131415		0.876359	0.00161698		0.880734	0.00185728		0.883252	0.00183555		0.880872	0.00185704
0.880899	0.00120007		0.884373	0.00421912		0.886566	0.00139028		0.884236	0.00163057		0.879716	0.00286646		0.883394	0.000433179		0.880289	0.00272198		0.880191	0.00124371		0.887525	0.000901558		0.881949	0.0013478		0.887298	9.02282e-05		0.878423	0.00120021		0.883859	0.00109939		0.88667	0.00212023		0.890752	0.00237925		0.888372	0.000773149
0.886211	0.00202795		0.888436	0.00463684		0.890318	0.00044393		0.889859	0.000876736		0.884717	0.00291601		0.889334	0.00130557		0.885601	0.0023655		0.888003	0.000778021		0.893773	0.00134018		0.886015	0.00126342		0.891361	1.9366e-05		0.882795	0.00106437		0.88886	0.00138796		0.891049	0.00203098		0.895753	0.00212357		0.892431	0.00132602
0.893711	0.00162753		0.894376	0.00566486		0.895942	6.43985e-05		0.897359	0.000838954		0.889091	0.00265964		0.893396	0.00109423		0.889976	0.00234482		0.894877	0.00110075		0.898148	0.00165311		0.893202	0.00183805		0.898547	0.000500877		0.887792	0.000694686		0.893235	0.000905382		0.896672	0.00168794		0.900128	0.00169243		0.896497	0.00157296
0.900898	0.00170574		0.902188	0.00513678		0.903755	0.000868617		0.90392	0.00157344		0.89628	0.0030188		0.899645	0.000946784		0.896226	0.00266873		0.899253	0.000937654		0.903462	0.00161157		0.900702	0.00246461		0.906047	0.000867071		0.895292	0.00134335		0.900109	0.00116272		0.904172	0.00158712		0.907002	0.00176433		0.903684	0.00149975
0.905586	0.00205311		0.909062	0.00482432		0.909693	0.000886336		0.908296	0.00131829		0.904092	0.002614		0.90777	0.000916401		0.904352	0.00328752		0.904254	0.00049731		0.911586	0.0011411		0.905699	0.00201666		0.911048	0.000348809		0.903104	0.0019741		0.907922	0.000836475		0.911359	0.00251521		0.915127	0.00165402		0.911184	0.00110553
0.910586	0.00250573		0.913438	0.00534619		0.914066	0.000618073		0.913297	0.00122611		0.909404	0.00235147		0.913706	0.00157633		0.910602	0.00267395		0.911441	0.000318183		0.918462	0.00124311		0.910078	0.00155271		0.915424	0.000803251		0.908109	0.00134933		0.913548	0.00112593		0.915738	0.00187473		0.920441	0.001459		0.916181	0.00113
0.918086	0.00232992		0.918435	0.00481146		0.919691	0.000852232		0.921109	0.00207918		0.913467	0.00169114		0.917768	0.00143984		0.914976	0.00314592		0.919253	0.0017304		0.922837	0.0014805		0.916952	0.00098444		0.922298	0.00129334		0.912168	0.00106968		0.917607	0.00138617		0.920735	0.00107168		0.924817	0.00166929		0.920553	0.00131116
0.925586	0.00187356		0.926247	0.00453446		0.927503	0.00105591		0.928296	0.00290356		0.92003	0.00138482		0.924021	0.00107167		0.92029	0.00242021		0.924254	0.00213046		0.928149	0.000822141		0.925078	0.00183016		0.93011	0.00128982		0.919355	0.00137278		0.923859	0.00095132		0.928548	0.00196333		0.931378	0.00219187		0.927434	0.00147943
0.929961	0.00214272		0.933438	0.00480415		0.934692	0.000827654		0.932984	0.00128119		0.928153	0.00148514		0.932459	0.00129686		0.928102	0.00142636		0.928626	0.00157034		0.935962	0.000601756		0.930701	0.00162349		0.935737	0.00141306		0.927167	0.00136636		0.931985	0.000414335		0.936047	0.00225509		0.939503	0.00115705		0.935247	0.00182645
0.934023	0.00177273		0.938123	0.0050262		0.939068	0.0013034		0.937673	0.00123408		0.934091	0.00144978		0.938394	0.00124614		0.934976	0.00218611		0.935504	0.0015346		0.943149	0.000673209		0.934767	0.000796406		0.940112	0.00041725		0.932485	0.00162388		0.93792	0.000999935		0.940427	0.00196181		0.944817	0.00154168		0.941182	0.000265292
0.941211	0.00107187		0.942811	0.00495706		0.944067	0.0013196		0.945172	0.00185066		0.938154	0.00192879		0.942144	0.0012142		0.939352	0.00216481		0.943629	0.00267196		0.946898	0.000951058		0.941015	0.000579882		0.946361	0.00117429		0.936544	0.000805968		0.941983	0.00123275		0.945111	0.00260447		0.948254	0.00173332		0.945241	0.0015605
0.948711	0.00186064		0.950623	0.00507739		0.951566	0.00137085		0.952985	0.00158755		0.944404	0.00278731		0.947458	0.00113936		0.944664	0.00190982		0.948939	0.00256799		0.951274	0.000278925		0.949141	0.00188538		0.954173	0.00132658		0.943731	0.0013376		0.947923	0.00125349		0.952611	0.00150551		0.954503	0.00148709		0.95149	0.00191255
0.953711	0.00195075		0.958123	0.00489811		0.959066	0.00125558		0.957986	0.00172753		0.952842	0.00253629		0.954958	0.000760689		0.952789	0.00321588		0.953002	0.00157944		0.958774	0.000962034		0.955389	0.00137256		0.960422	0.00106953		0.951856	0.00158495		0.956361	0.00109716		0.960423	0.00192056		0.962002	0.000637612		0.959302	0.00119163
0.958086	0.00170506		0.962498	0.00522077		0.963442	0.000253212		0.962361	0.00177646		0.95878	0.00273509		0.961519	0.000421339		0.959976	0.00270235		0.959876	0.000906248		0.96565	0.00183002		0.959448	0.00148959		0.964485	0.00089348		0.956861	0.000901543		0.962609	0.0013128		0.964795	0.00168859		0.967942	0.00115795		0.965246	0.00119993
0.964961	0.00127642		0.966561	0.00555118		0.96813	0.00148859		0.969548	0.00152427		0.962217	0.00268411		0.966207	0.00137706		0.963415	0.00249289		0.968001	0.00166218		0.970649	0.000802987		0.965079	0.00183783		0.970424	0.00115096		0.960607	0.000813712		0.966046	0.000983433		0.968548	0.000752425		0.972317	0.00219098		0.969304	0.0012963
0.973086	0.001112		0.973748	0.0046426		0.975942	0.00220974		0.977361	0.00135266		0.967842	0.00184882		0.971209	0.00107725		0.968101	0.00290868		0.973315	0.00128464		0.975024	0.000635115		0.973517	0.00140171		0.978549	0.00109506		0.966855	0.000474112		0.97136	0.00192628		0.975423	0.00126153		0.978253	0.00335544		0.975553	0.000875857
0.978711	0.0013951		0.980935	0.00432637		0.983755	0.00158481		0.982045	0.00134924		0.975341	0.0014286		0.979021	0.00193088		0.975601	0.00197205		0.976752	0.00130609		0.982211	0.00122159		0.979765	0.00158952		0.984798	0.00207635		0.974355	0.000532961		0.979173	0.00139197		0.982922	0.00173507		0.986066	0.00188228		0.983678	0.00101091
0.982774	0.00132861		0.985936	0.00514498		0.987818	0.00095245		0.985799	0.00197812		0.981904	0.0018556		0.986521	0.00168044		0.982477	0.00228259		0.983001	0.00126775		0.990024	0.00158682		0.983198	0.00210169		0.988548	0.00106315		0.980298	0.000651766		0.985734	0.00170885		0.988232	0.00269066		0.992627	0.00118468		0.989934	0.00142523
0.989023	0.00114532		0.990311	0.00605311		0.99188	0.00148497		0.99236	0.00180059		0.98628	0.00173493		0.991209	0.00085072		0.987163	0.00333513		0.990504	0.00149236		0.995648	0.0019796		0.988516	0.0012998		0.993549	0.00102376		0.98467	0.0012084		0.990109	0.00105546		0.992612	0.0028109		0.997002	0.000965629		0.993368	0.00147309
0.997149	0.00162158		0.997185	0.00582309		0.998754	0.000855661		1.00017	0.0010636		0.991592	0.00166564		0.995581	0.000501988		0.991851	0.00304422		0.99644	0.00197516		0.999711	0.000782541		0.996329	0.00105413		1.00136	0.000906464		0.990293	0.00162676		0.99511	0.00105948		0.999173	0.00174489		1.00232	0.00198428		0.998678	0.000637663
1.00309	0.00233502		1.005	0.005734		1.00625	0.000659608		1.00548	0.000532825		0.999092	0.00211957		1.00308	0.00124927		0.999038	0.0014698		1.00082	0.00170875		1.00627	0.00124225		1.00289	0.00110344		1.00792	0.000730189		0.998105	0.00125729		1.00292	0.0013302		1.00699	0.00116857		1.00982	0.00243834		1.00649	0.000455848
1.00715	0.00210939		1.01094	0.00574176		1.01157	0.00104867		1.00986	0.000217591		1.00628	0.0021796		1.01089	0.00164782		1.00685	0.00154331		1.00675	0.00239125		1.0144	0.000720558		1.00726	0.00127898		1.0123	0.000651404		1.00498	0.000848225		1.01042	0.00134826		1.01323	0.00187081		1.017	0.00177152		1.01306	0.000463059
1.0134	0.00167378		1.015	0.00591284		1.01594	0.0013034		1.01611	0.00174232		1.01097	0.0026251		1.01589	0.000525445		1.01216	0.00206644		1.01456	0.00159525		1.02002	0.00107244		1.01227	0.0016053		1.0173	0.00118793		1.00936	0.00103783		1.01511	0.00130032		1.0173	0.00256191		1.02169	0.00257583		1.01743	0.00114836
1.02152	0.00133899		1.02094	0.00556425		1.0225	0.00150327		1.02424	0.00221938		1.01565	0.0028975		1.01996	0.000630221		1.01623	0.00230577		1.02113	0.00136219		1.02409	0.00109396		1.01977	0.000857331		1.02511	0.00123789		1.01467	0.00126393		1.01948	0.00145619		1.02324	0.00252241		1.02638	0.00182094		1.02243	0.00122616
1.02746	0.00108819		1.02906	0.00442698		1.03032	0.000673326		1.03048	0.00156706		1.02315	0.00232331		1.02714	0.00137661		1.02279	0.00230974		1.0255	0.000942203		1.03065	0.000938145		1.02727	0.00141442		1.03261	0.00157613		1.02217	0.00192056		1.02667	0.00108468		1.03105	0.00233409		1.03419	0.00117277		1.03024	0.000608598
1.03121	0.000713786		1.03531	0.00478487		1.03625	0.000849564		1.03455	0.0011988		1.03097	0.00250175		1.03496	0.00107703		1.03091	0.00160115		1.03081	0.00189913		1.03877	0.000151945		1.03226	0.00181416		1.03761	0.000246917		1.02936	0.000929198		1.03449	0.00190576		1.03761	0.00201745		1.04169	0.00160706		1.03774	0.000989928
1.03652	0.0016362		1.03937	0.00505678		1.04032	0.00111802		1.04017	0.00162966		1.03565	0.00229967		1.03996	0.00117912		1.03685	0.00207877		1.03863	0.00206353		1.0444	0.00156809		1.03663	0.0019588		1.04199	0.00070488		1.03405	0.000860172		1.03948	0.00229512		1.04168	0.00153016		1.04607	0.00240801		1.04243	0.00110203
1.04402	0.00139		1.04531	0.00604469		1.04625	0.000990365		1.0483	0.00136632		1.04003	0.00190515		1.04371	0.000823912		1.04091	0.00296841		1.04581	0.0013115		1.04784	0.00159284		1.04383	0.00131339		1.04886	0.00031866		1.03873	0.00132743		1.04386	0.00134893		1.0473	0.00125521		1.05013	0.00221367		1.0468	0.00148664
1.05059	0.00201146		1.05375	0.00562763		1.05438	0.00102009		1.05517	0.00133149		1.04753	0.00296864		1.04996	0.000971358		1.04748	0.0028122		1.05019	0.00117591		1.05346	0.000896607		1.05164	0.00163116		1.05667	0.00182789		1.04654	0.00125796		1.05105	0.00123609		1.05542	0.00222978		1.05732	0.00146552		1.05399	0.00185836
1.05527	0.00218574		1.06	0.0053504		1.06094	0.00119461		1.05924	0.00150971		1.05534	0.00359217		1.05777	0.00204459		1.0556	0.00254656		1.05519	0.00187553		1.06127	0.00112087		1.05695	0.00171685		1.06198	0.00173744		1.05404	0.000849552		1.05917	0.00113284		1.06199	0.00181189		1.0645	0.00110874		1.0618	0.00117109
1.06027	0.0026319		1.06344	0.00591239		1.065	0.00126434		1.06486	0.00188958		1.06003	0.00233605		1.06339	0.00208994		1.06123	0.00271154		1.06269	0.00172347		1.06752	0.0004539		1.06101	0.000795749		1.06605	0.000603429		1.05811	0.00109734		1.06386	0.00105122		1.06573	0.00213376		1.0695	0.00146709		1.06712	0.000707591
1.06777	0.00223556		1.06875	0.00546364		1.07063	0.000759063		1.07298	0.00149241		1.06378	0.00161836		1.06777	0.00217796		1.06498	0.00232645		1.07019	0.00141569		1.0719	0.000656207		1.0682	0.0018146		1.07324	0.00135122		1.06217	0.00114822		1.06761	0.00134982		1.07042	0.00232296		1.07388	0.00154572		1.07118	0.000982936
1.07527	0.00218557		1.07625	0.00525689		1.07875	0.00132207		1.07955	0.00179262		1.07034	0.00219441		1.07371	0.0018853		1.0706	0.00193822		1.07456	0.00126017		1.07721	0.000856146		1.07601	0.00098444		1.08136	0.00153586		1.06936	0.00122035		1.07386	0.00166604		1.07824	0.00273976		1.08075	0.00193777		1.07837	0.000673938
1.07996	0.00200125		1.08281	0.00613289		1.08532	0.00135256		1.0833	0.00162624		1.07815	0.00178879		1.08183	0.00172021		1.0781	0.0025712		1.07863	0.000522435		1.08502	0.000554192		1.08133	0.0010526		1.08636	0.00117363		1.07686	0.000434953		1.08167	0.00215329		1.08511	0.00245106		1.08857	0.00185644		1.08649	0.000290423
1.08465	0.00239402		1.08719	0.00577034		1.08907	0.00139752		1.08798	0.000975745		1.08347	0.00236751		1.0884	0.00138622		1.08435	0.00246344		1.0855	0.00167257		1.09221	0.000307765		1.08507	0.000645628		1.0898	0.000572179		1.08155	0.00117101		1.0873	0.000980757		1.08948	0.00134053		1.0945	0.00171198		1.0915	0.00103342
1.09184	0.00245098		1.0925	0.00574176		1.09407	0.000449265		1.09548	0.00156297		1.08784	0.00305436		1.09246	0.000627987		1.08873	0.00218632		1.093	0.00122248		1.0969	0.00163955		1.09132	0.000932501		1.09636	0.000942775		1.08592	0.00192941		1.09167	0.0012517		1.09449	0.000569993		1.09856	0.000842285		1.09493	0.0009141
1.09965	0.002553		1.1	0.00585189		1.10157	0.00101323		1.10236	0.00221483		1.09409	0.00258275		1.09777	0.000849603		1.09404	0.00175528		1.098	0.00128919		1.10159	0.00105867		1.09883	0.00199847		1.10386	0.000850346		1.09279	0.00125309		1.09761	0.00173182		1.10167	0.00161745		1.1045	0.000676254		1.10149	0.00095846
1.10496	0.00160457		1.1075	0.00574885		1.10844	0.001923		1.10736	0.00193988		1.10222	0.00269213		1.10589	0.00163598		1.10185	0.00219258		1.10238	0.00124501		1.10909	0.00185434		1.10477	0.00195924		1.10949	0.000785866		1.10092	0.00157411		1.10542	0.00130812		1.10949	0.00206895		1.11263	0.00123613		1.10899	0.00129128
1.10902	0.000995015		1.11219	0.00523318		1.11282	0.00121385		1.11205	0.00197197		1.10847	0.00246639		1.11277	0.00167262		1.10904	0.0022214		1.10925	0.0012279		1.11659	0.000790504		1.10914	0.00179005		1.11386	0.00191196		1.10654	0.00167676		1.11199	0.000501528		1.11448	0.00310157		1.11888	0.00241609		1.11462	0.00190905
1.11621	0.00159624		1.11688	0.00514188		1.11782	0.00076135		1.11892	0.00157913		1.11253	0.00292464		1.11714	0.000663062		1.11373	0.00220469		1.11738	0.00117331		1.12127	0.00104253		1.11507	0.00119286		1.1198	0.00110188		1.11061	0.000863048		1.11605	0.0013554		1.11855	0.00164058		1.12294	0.00243834		1.11899	0.00184109
1.12402	0.00209936		1.12375	0.00481036		1.125	0.00170122		1.12673	0.00130463		1.11815	0.00294808		1.12214	0.000706178		1.11841	0.00215395		1.123	0.0016455		1.12565	0.00170906		1.12288	0.00180649		1.12761	0.000791368		1.11686	0.000429201		1.12167	0.00171264		1.12574	0.0011605		1.12888	0.00212582		1.12493	0.00122943
1.12902	0.00129954		1.13156	0.00438953		1.13282	0.00165359		1.13236	0.00167176		1.12597	0.00269274		1.12996	0.00186698		1.1256	0.0021339		1.12707	0.00177654		1.13315	0.000482739		1.12945	0.00180364		1.13417	0.00163159		1.12498	0.000906189		1.12948	0.000536539		1.13355	0.00162749		1.137	0.00228848		1.13305	0.00097922
1.13277	0.00120517		1.13688	0.00479418		1.13782	0.0011344		1.13673	0.00171797		1.13284	0.00173739		1.13714	0.00171998		1.13341	0.00255491		1.13332	0.00207003		1.14096	0		1.13351	0.00127548		1.13855	0.00154972		1.13123	0.00107367		1.13636	0.001495		1.13886	0.001909		1.14325	0.0015136		1.1393	0.00122353
1.13902	0.00141584		1.14125	0.00476825		1.14219	0.000929014		1.1433	0.00140797		1.13691	0.0018186		1.14121	0.00155087		1.1381	0.00245467		1.14144	0.00109036		1.14565	0.000355113		1.13882	0.00175981		1.14386	0.000892819		1.1353	0.000809508		1.14073	0.00173093		1.14293	0.00181603		1.147	0.000833074		1.14368	0.00214463
1.14684	0.00151395		1.14813	0.00510376		1.14907	0.00115308		1.15142	0.00140546		1.14222	0.00282123		1.14589	0.000706402		1.14248	0.0029446		1.14769	0.000863145		1.1494	0.00215091		1.14664	0.00166228		1.15167	0.000832301		1.14123	0.000509952		1.14573	0.00187008		1.1498	0.00150354		1.152	0.00148978		1.14899	0.00109875
1.15246	0.00163246		1.15625	0.00545256		1.15719	0.000732771		1.15705	0.000946156		1.15034	0.00247133		1.15308	0.00154618		1.15029	0.00268168		1.15175	0.000817442		1.15627	0.0011609		1.15382	0.00080583		1.15886	0.00060827		1.14936	0.000166149		1.15386	0.000857437		1.15824	0.00106492		1.15982	0.0021593		1.1568	0.00132493
1.15684	0.00249978		1.16125	0.0048888		1.1625	0.00164902		1.16111	0.00142663		1.15753	0.00212903		1.16027	0.00232116		1.1581	0.00210341		1.15769	0.0010074		1.16377	0.000687844		1.1582	0.000879685		1.16324	0.000872573		1.15561	0.000903092		1.16073	0.000454475		1.16355	0.0018204		1.16638	0.00186318		1.16368	0.00148249
1.16277	0.00190332		1.165	0.00498166		1.16688	0.00198454		1.16736	0.00130463		1.16128	0.00141421		1.16496	0.00127608		1.16248	0.00184508		1.16613	0.00109317		1.16877	0.00124247		1.1632	0.00161955		1.16824	0.000946516		1.15936	0.00141437		1.1648	0.00136945		1.16699	0.00206502		1.17075	0.00172995		1.16806	0.00143376
1.1709	0.000769726		1.17125	0.00532293		1.17375	0.000698285		1.1758	0.000931134		1.16597	0.00157539		1.16965	0.00204459		1.16623	0.00218235		1.17238	0.00213133		1.17315	0.00164493		1.17101	0.00126956		1.17605	0.000843084		1.16467	0.001148		1.16917	0.00156859		1.17292	0.00191882		1.17575	0.00149944		1.17337	0.00152554
1.17746	0.000584223		1.17875	0.00533844		1.18188	0.0012834		1.18142	0.000743132		1.17347	0.00226287		1.17652	0.00216746		1.1731	0.00193258		1.17613	0.0015398		1.17971	0.000836346		1.17851	0.00191869		1.18323	0.000625656		1.17217	0.000962826		1.17667	0.0016676		1.18074	0.00170321		1.18325	0.00139789		1.18118	0.000931145
1.18152	0.00130702		1.18437	0.00537146		1.18719	0.00128949		1.18486	0.00100215		1.18034	0.00211032		1.18464	0.00143984		1.1806	0.00171414		1.18113	0.00154435		1.18752	0.000696883		1.18258	0.00183498		1.18698	0.00102046		1.17873	0.000998445		1.18354	0.000988115		1.18667	0.00144768		1.19075	0.000909237		1.18837	0.00157296
1.18684	0.00123		1.18875	0.00706783		1.19063	0.000853184		1.1908	0.000757699		1.18503	0.00160541		1.18996	0.00171194		1.18591	0.00235151		1.18894	0.00165503		1.19377	0.000213283		1.18664	0.00178917		1.19136	0.00103961		1.18311	0.0013115		1.18855	0.000928574		1.19073	0.00155417		1.19575	0.00168614		1.19212	0.00121042
1.19496	0.00126927		1.19469	0.00581755		1.19688	0.000799456		1.1983	0.00119516		1.18972	0.00242363		1.19402	0.00151736		1.19029	0.00257329		1.1955	0.00208931		1.19815	0.000313361		1.19382	0.00124874		1.19886	0.0010363		1.18811	0.0020803		1.19323	0.000989008		1.19668	0.00172853		1.20013	0.00162301		1.19649	0.00111842
1.20184	0.00151803		1.20281	0.0043718		1.20469	0.00102752		1.20424	0.00171706		1.1969	0.00263127		1.20058	0.00080738		1.19685	0.00209986		1.20019	0.00109534		1.20377	0.00112732		1.20132	0.000855358		1.20574	0.000994711		1.19561	0.00142256		1.20011	0.00101042		1.20449	0.00182083		1.20731	0.00110762		1.20399	0.00114421
1.20621	0.000813253		1.20937	0.00489988		1.21063	0.00166255		1.20861	0		1.20472	0.0019991		1.20871	0.00112841		1.20466	0.00174943		1.20519	0.00118198		1.21159	0.00172133		1.20633	0.00191431		1.21073	0.000772882		1.20311	0.000292255		1.20792	0.00111456		1.21136	0.00182673		1.21513	0.00210246		1.21087	0.00175171
1.21152	0.00125346		1.21344	0.00553367		1.215	0.00115555		1.21423	0.000933182		1.21003	0.00220839		1.21464	0.00121889		1.21091	0.00214538		1.213	0.00205877		1.21846	0.00149965		1.2107	0.00198751		1.21511	0.00057504		1.2081	0.00137411		1.21323	0.00203176		1.21573	0.00256409		1.22013	0.00197821		1.21556	0.00261665
1.21934	0.00177001		1.21875	0.00545899		1.22063	0.000815079		1.22205	0.000708308		1.21409	0.00222463		1.21871	0.0015292		1.21498	0.00195785		1.2205	0.00192318		1.22252	0.00105049		1.21757	0.00174556		1.22198	0.000146566		1.21248	0.0014095		1.2173	0.00141784		1.22074	0.00205608		1.2245	0.00221007		1.22024	0.00187409
1.22621	0.00162328		1.22687	0.00500315		1.22875	0.00103419		1.22892	0.000880378		1.22097	0.00257145		1.22496	0.00153523		1.22091	0.00128184		1.22519	0.0015216		1.22815	0.000244921		1.22539	0.00209358		1.23011	0.00139942		1.21967	0.000959286		1.22386	0.00088665		1.22855	0.00191489		1.23169	0.00184341		1.22712	0.0014237
1.23027	0.00164725		1.23375	0.00545943		1.23563	0.000755443		1.23361	0.000998733		1.22909	0.00334321		1.2334	0.00121867		1.22873	0.00164209		1.22988	0.00187011		1.23627	0.000706568		1.23102	0.000631602		1.23574	0.00198106		1.22748	0.00108628		1.23198	0.000516246		1.23574	0.00128881		1.2395	0.00182499		1.23524	0.00147397
1.23496	0.00163535		1.23813	0.00516647		1.24	0.000798503		1.23861	0.0014437		1.2344	0.00183998		1.23902	0.00144855		1.2356	0.00200901		1.23675	0.00181704		1.24284	0.000516959		1.23508	0.00044291		1.2398	0.00211354		1.23279	0.00161282		1.23792	0.000934819		1.24011	0.0015114		1.2445	0.00130825		1.24055	0.00193856
1.24215	0.00185877		1.24344	0.00487152		1.245	0.000484132		1.24611	0.00180833		1.23847	0.00200794		1.24246	0.00207073		1.23966	0.00279925		1.24457	0.0017499		1.24659	0.00105738		1.24164	0.00116174		1.24605	0.00139106		1.23686	0.00189092		1.24198	0.000806147		1.24511	0.00252962		1.24825	0.00149293		1.24462	0.00188764
1.24934	0.00189226		1.25125	0.00495373		1.25282	0.00107896		1.25361	0.000839637		1.24534	0.00265779		1.24808	0.0024485		1.24529	0.00311293		1.24988	0.00155171		1.25159	0.00163653		1.24945	0.000903134		1.25417	0.00164303		1.24405	0.00110198		1.24823	0.000111054		1.25293	0.00245106		1.2545	0.00189172		1.25118	0.00167348
1.25434	0.00212129		1.25844	0.00516692		1.26	0.000901769		1.2583	0.000907236		1.25347	0.00272954		1.2559	0.00155444		1.25341	0.00204285		1.25394	0.00194549		1.25909	0.00108385		1.2557	0.000946965		1.26011	0.000477769		1.25217	0.000866145		1.25636	0.00111099		1.26043	0.00154217		1.26231	0.00200338		1.25931	0.00233147
1.25871	0.00137605		1.2625	0.00467074		1.26469	0.00120661		1.26299	0.00216635		1.25909	0.00321328		1.26214	0.0016476		1.25998	0.00175695		1.26113	0.00170506		1.26596	0.00128852		1.25976	0.00134626		1.26417	1.49646e-05		1.25717	0.00176614		1.2623	0.0016647		1.26449	0.00257893		1.26794	0.00143249		1.26524	0.00169599
1.26559	0.00133559		1.26687	0.00463551		1.26938	0.00112926		1.27049	0.0015245		1.26284	0.00289791		1.26652	0.00167039		1.26373	0.00220866		1.26894	0.000880906		1.27034	0.000626291		1.26601	0.000962086		1.27042	0.00115492		1.26092	0.00140043		1.26573	0.00151886		1.26855	0.00245193		1.27232	0.00211144		1.26931	0.00143485
1.27371	0.00150528		1.27406	0.00603184		1.27719	0.00124567		1.2783	0.00123817		1.26847	0.00289092		1.27183	0.00127362		1.26841	0.00212555		1.27394	0.000877224		1.27502	0.000382446		1.27414	0.00124984		1.27855	0.00196433		1.26717	0.00172477		1.27136	0.00125349		1.27574	0.00313671		1.27825	0.00204561		1.27556	0.000634603
1.27934	0.000869023		1.28125	0.00564071		1.28469	0.00118299		1.28267	0.00231452		1.27628	0.00221373		1.27965	0.0018967		1.27623	0.00170098		1.27769	0.00134768		1.28221	0.00155303		1.28039	0.00098466		1.28448	0.0012687		1.27498	0.00128672		1.27917	0.00119863		1.28324	0.00202945		1.28606	0.00200989		1.28399	0.000807677
1.2834	0.00123697		1.28625	0.00484182		1.28876	0.00121138		1.28642	0.00226581		1.28253	0.00132252		1.28683	0.00157343		1.2831	0.00306197		1.28394	0.00130587		1.29002	0.00189523		1.28383	0.000570458		1.28793	0.000787846		1.28061	0.000555528		1.28542	0.00110341		1.28824	0.00124015		1.29263	0.00230061		1.28962	0.000829966
1.28965	0.00180589		1.29062	0.00555295		1.29282	0.00111992		1.2933	0.00169862		1.2869	0.00185684		1.29152	0.00188262		1.28748	0.00305759		1.29175	0.000973177		1.29534	0.00153624		1.28945	0.00128161		1.29355	0.000585603		1.28499	0.000538713		1.2898	0.000801241		1.29261	0.0018575		1.297	0.0030573		1.29306	0
1.29777	0.00127318		1.2975	0.00557755		1.3	0.00126815		1.3008	0.000752236		1.29222	0.00190207		1.29621	0.000978954		1.29248	0.00169868		1.29738	0.00153893		1.29971	0.000997976		1.29695	0.00079531		1.30105	0.00129158		1.29092	0.000972339		1.29542	0.00136186		1.29918	0.00245346		1.30232	0.00274097		1.29868	0.000826907
1.30371	0.00123238		1.30531	0.00472171		1.30719	0.00132303		1.30611	0.00100693		1.30003	0.00187904		1.30371	0.000313435		1.29966	0.00245593		1.30175	0.00161431		1.30627	0.00105178		1.30351	0.00102849		1.30761	0.000824158		1.29873	0.00129645		1.30292	0.00100016		1.3073	0.00230616		1.31013	0.00179106		1.30649	0.000724418
1.30777	0.00168296		1.31094	0.00513279		1.3125	0.00190471		1.31048	0.00173208		1.30722	0.00196107		1.31121	0.00146977		1.30716	0.00283016		1.30769	0.000650228		1.3144	0.00125861		1.30789	0.00117598		1.3123	0.000857388		1.3053	0.00163959		1.31011	0.00110898		1.31292	0.00126263		1.317	0.000797576		1.31274	0.000527962
1.31402	0.00164844		1.315	0.00527063		1.31688	0.00140629		1.31705	0.00134606		1.3119	0.00288147		1.31621	0.00218109		1.31216	0.00296236		1.31581	0.000396375		1.32002	0.000842372		1.3132	0.00121148		1.3173	0.000570858		1.30967	0.00165464		1.3148	0.00137458		1.31698	0.00178505		1.32138	0.00150888		1.31712	0.00113875
1.32246	0.00146396		1.32156	0.00562918		1.32344	0.00095245		1.32486	0.000455894		1.31659	0.00251347		1.32089	0.00237009		1.31654	0.00191274		1.32238	0.0011484		1.32409	0.0016671		1.3207	0.000903134		1.3248	0.000502417		1.31498	0.000724774		1.31949	0.000857437		1.32324	0.00225488		1.32669	0.00161672		1.32243	0.00142218
1.3284	0.00140309		1.32969	0.00592591		1.33157	0.00146154		1.33111	0.00103674		1.32409	0.00203693		1.32808	0.0023301		1.32341	0.00275122		1.32644	0.00109404		1.33065	0.00150676		1.3282	0.00116634		1.3323	0.000594186		1.3228	0.00101592		1.32699	0.00182192		1.33136	0.00159345		1.3345	0.00107055		1.33024	0.00113459
1.33184	0.00209103		1.33563	0.00614907		1.33719	0.00237836		1.33517	0.000936141		1.33159	0.00238313		1.33589	0.00177561		1.33154	0.00326329		1.33175	0.00122248		1.33877	0.000737129		1.33289	0.00108153		1.33699	0.00131887		1.32967	0.000729863		1.33448	0.00224071		1.33761	0.00134228		1.34169	0.00133386		1.33743	0.00151745
1.33746	0.000838928		1.33969	0.00591062		1.34157	0.00190547		1.34111	0.0012186		1.33659	0.00258563		1.34058	0.00230954		1.33685	0.00163603		1.33988	0.00130219		1.3444	0.000548596		1.33758	0.000928994		1.34167	0.00155699		1.33404	0.00037367		1.33948	0.00186674		1.34167	0.00234631		1.34575	0.00197934		1.34211	0.00109504
1.34496	0.00045534		1.34594	0.00628823		1.3475	0.000857757		1.34923	0.00175848		1.34128	0.00308356		1.34433	0.00184084		1.34123	0.00157254		1.34675	0.00161149		1.34815	0.00103112		1.34476	0.00156761		1.34886	0.00135716		1.33936	0.00137743		1.34386	0.00185113		1.34729	0.00191663		1.35013	0.00178882		1.34681	0.00108564
1.35121	0.00109448		1.35406	0.00634119		1.35563	0.00109515		1.35548	0.00148672		1.34878	0.00211361		1.35089	0.00193869		1.3481	0.00273493		1.35113	0.00141764		1.35377	0.00157434		1.35258	0.00166141		1.35667	0.000825919		1.34717	0.00230153		1.35105	0.00074393		1.35573	0.00207157		1.35732	0.0016976		1.35431	0.00185355
1.35559	0.00163127		1.36031	0.0052478		1.36188	0.00153032		1.35955	0.00149469		1.35628	0.00197505		1.35871	0.001808		1.35623	0.00159552		1.35613	0.00125475		1.36159	0.00161351		1.35757	0.0014416		1.36167	0.00177155		1.35436	0.00170198		1.35917	0.00124457		1.3623	0.00249863		1.36482	0.00270682		1.36181	0.00185289
1.3609	0.00095965		1.36375	0.00496215		1.36594	0.00125672		1.36517	0.0022756		1.36097	0.00245694		1.36402	0.00104821		1.36154	0.00140506		1.36394	0.00112783		1.36752	0.00196152		1.36195	0.000526189		1.36605	0.00158208		1.35842	0.000763933		1.36386	0.00186919		1.36573	0.00205826		1.3695	0.00202809		1.3668	0.00152335
1.36871	0.00104177		1.36906	0.00534553		1.37188	0.00177286		1.37361	0.00214154		1.36472	0.00171293		1.36808	0.00107435		1.36498	0.000775204		1.37113	0.00129331		1.3719	0.000880896		1.36914	0.00125137		1.37324	0.00147116		1.3628	0.00112964		1.36761	0.00232099		1.37073	0.00263087		1.37419	0.00113301		1.37118	0.00101091
1.3759	0.000597315		1.37687	0.00547207		1.38	0.00156881		1.38017	0.0015443		1.37159	0.00213335		1.37464	0.000950582		1.37123	0.00182064		1.37519	0.000912962		1.37752	0.000798682		1.37726	0.000853605		1.38136	0.000700039		1.36998	0.00156105		1.37417	0.00168432		1.37854	0.00303567		1.38107	0.00185532		1.37868	0.000520969
1.38059	0.00110656		1.38312	0.00540093		1.38626	0.000838323		1.38392	0.00121018		1.3794	0.00256014		1.38246	0.00163799		1.37904	0.00171309		1.37957	0.00156146		1.38534	0.000369963		1.38226	0.00129191		1.38605	0.00155303		1.37717	0.00200375		1.38167	0.00141026		1.38511	0.00220534		1.38888	0.00163492		1.38618	0.000248684
1.38527	0.00152109		1.3875	0.00520681		1.39	0.00131541		1.38892	0.0019697		1.38472	0.00312056		1.38871	0.00174344		1.38498	0.00174233		1.38706	0.00162557		1.39252	0.000170885		1.3857	0.00153759		1.38949	0.000738551		1.38217	0.000919906		1.38698	0.0018324		1.38949	0.00206895		1.3945	0.00134847		1.39087	0.000997795
1.39277	0.00143148		1.39281	0.00425236		1.395	0.00131331		1.39642	0.00155728		1.38878	0.00285639		1.39308	0.00120325		1.38904	0.000800682		1.39425	0.00174405		1.3969	0.000942019		1.39226	0.00157155		1.39605	0.00105567		1.38655	0.00183074		1.39136	0.00189171		1.39448	0.00224571		1.39856	0.0015318		1.39462	0.00107756
1.40027	0.00171305		1.40031	0.0041759		1.40282	0.00159415		1.40299	0.000538287		1.39534	0.00258358		1.39871	0.00142464		1.39466	0.00170829		1.39894	0.000505757		1.40159	0.00132963		1.40008	0.00180912		1.40386	0.00159726		1.39374	0.000894021		1.39792	0.00170595		1.40198	0.00189918		1.40482	0.00133296		1.40118	0.00118638
1.40527	0.00173142		1.4075	0.00381713		1.40938	0.00167055		1.40767	2.4354e-05		1.40347	0.00148226		1.40652	0.00115366		1.40248	0.00239808		1.40363	0.000954982		1.4094	0.0012571		1.4057	0.00187399		1.40918	0.00121544		1.40155	0.000386723		1.40574	0.00165912		1.40948	0.00180403		1.41294	0.00152416		1.40899	0.00125129
1.40996	0.000748982		1.41219	0.00424017		1.41407	0.00166826		1.41267	0.000481613		1.4094	0.00240143		1.41339	0.000766944		1.40966	0.00235527		1.4105	0.000587848		1.4169	0.00118608		1.41008	0.00191606		1.41355	0.00113842		1.40686	0.00100176		1.41198	0.000576234		1.41449	0.00141974		1.41888	0.00117659		1.4143	0.000592427
1.41715	0.000716336		1.41687	0.00443939		1.41907	0.00204246		1.41986	0.00100033		1.41347	0.00219687		1.41777	0.00134489		1.41404	0.00239432		1.41863	0.00108732		1.42159	0.00127475		1.41601	0.00224195		1.4198	0.000619494		1.41092	0.00114712		1.41605	0.00076846		1.41886	0.00168903		1.42263	0.00160234		1.41868	0.00124189
1.42496	0.00170064		1.42437	0.00467208		1.42657	0.00280591		1.42767	0.00122634		1.4194	0.00171005		1.42308	0.00195433		1.41904	0.00158925		1.42425	0.0013715		1.42627	0.00110968		1.42414	0.00143283		1.42761	0.000631157		1.41749	0.000955304		1.42198	0.00134893		1.42605	0.00209121		1.42888	0.00140351		1.42493	0.000939012
1.42965	0.00135259		1.43219	0.0036886		1.43407	0.00112907		1.43267	0.00165811		1.42753	0.00173595		1.43121	0.00180532		1.42654	0.00241499		1.42831	0.00131302		1.43377	0.000598097		1.43039	0.00164585		1.43386	0.000643701		1.42561	0.000404422		1.4298	0.00132908		1.43386	0.00264265		1.43731	0.00113211		1.43274	0.00120758
1.4334	0.000808153		1.43719	0.0031716		1.43907	0.000845754		1.43705	0.00238371		1.43378	0.00215206		1.43808	0.00176064		1.43404	0.00275874		1.43488	0.0019522		1.44127	0.00111441		1.43477	0.00192856		1.43824	0.000420771		1.43155	0.00117875		1.43636	0.000391366		1.43918	0.00211412		1.44325	0.000865201		1.43899	0.00168703
1.43996	0.000910851		1.44156	0.00292672		1.44375	0.00126911		1.44392	0.00233227		1.43815	0.00192776		1.44183	0.00124927		1.43873	0.00166673		1.443	0.00157532		1.44565	0.00159392		1.44008	0.000815034		1.44386	0.000918787		1.43561	0.000574112		1.44074	0.000990122		1.44323	0.00201767		1.44669	0.00111099		1.44337	0.00106423
1.44777	0.000989065		1.44875	0.00293093		1.45063	0.00123805		1.45173	0.00161987		1.44378	0.00230501		1.44652	0.00167106		1.44341	0.00253904		1.44894	0.00218461		1.44971	0.00140324		1.4482	0.000467894		1.45167	0.000876314		1.44186	0.000671898		1.44605	0.00179003		1.45042	0.00188303		1.45232	0.00121254		1.44899	0.000639629
1.45309	0.00152483		1.45688	0.00338677		1.45844	0.000865188		1.45736	0.000749277		1.4519	0.00300379		1.45371	0.00189401		1.45091	0.00280406		1.453	0.00152594		1.45659	0.000885416		1.45508	0.000848345		1.45855	0.0014716		1.45029	0.000449112		1.45417	0.00104431		1.45855	0.00186841		1.45982	0.00159043		1.45681	0.000926774
1.45715	0.00146464		1.46156	0.0032773		1.46375	0.00117575		1.46142	0.00109592		1.45847	0.00277559		1.46089	0.00223091		1.45873	0.00261506		1.45925	0.00172434		1.46409	0.00033682		1.45914	0.00126079		1.46292	0.000553033		1.45624	0.000627872		1.46105	0.000166804		1.46355	0.00226666		1.46638	0.00120131		1.46368	0.00173467
1.46371	0.00131399		1.465	0.00327952		1.46782	0.00104809		1.4683	0.00106815		1.46222	0.00303052		1.46558	0.00200058		1.46279	0.00146645		1.46738	0.00210382		1.46909	0.000748536		1.46445	0.00142341		1.46823	0.000860029		1.45967	0.000982958		1.46479	0.000119305		1.4673	0.00283905		1.47075	0.00126219		1.46774	0.0011193
1.47152	0.00139051		1.47156	0.00305459		1.475	0.000639983		1.47642	0.000867632		1.46722	0.00279944		1.47027	0.0018605		1.46685	0.0025474		1.47332	0.00149085		1.47346	0.00143961		1.47258	0.0013421		1.47605	0.00170399		1.4653	0.00145464		1.46948	0.00040653		1.47355	0.00238581		1.47607	0.00217435		1.47306	0.00131837
1.47777	0.00139391		1.47937	0.00369835		1.48313	0.0012933		1.48174	0.00129849		1.47472	0.00328688		1.47746	0.00134869		1.47373	0.003072		1.47675	0.00152464		1.48002	0.000926093		1.47977	0.00146066		1.48324	0.00177508		1.47311	0.0020376		1.47698	0.000736125		1.48105	0.00248553		1.48357	0.00218536		1.48118	0.00133761
1.48215	0.00109499		1.48468	0.00420471		1.48813	0.00127349		1.48517	0.000663242		1.48159	0.00258358		1.48527	0.00171172		1.48123	0.0027483		1.48238	0.00121512		1.48815	0.000905647		1.48351	0.00165133		1.48699	0.00168903		1.47936	0.00187278		1.48386	0.00169369		1.48699	0.00225466		1.49107	0.00261403		1.48806	0.0010391
1.48777	0.00148351		1.48906	0.00420804		1.49188	0.00129711		1.49142	0.000199838		1.48597	0.00238375		1.4909	0.00120571		1.48654	0.00227215		1.48988	0.00134508		1.49409	0.0010068		1.48789	0.00186566		1.49136	0.00147138		1.48373	0.000840703		1.48855	0.00170863		1.49136	0.00245171		1.49575	0.00201528		1.4918	0.00068246
1.4959	0.00144372		1.49531	0.00460692		1.49813	0.00109668		1.49892	0.00099805		1.49097	0.00264792		1.49496	0.00117801		1.49091	0.00201632		1.49644	0.00149106		1.49815	0.000826015		1.49539	0.00115187		1.49886	0.00112059		1.48904	0.00124269		1.49323	0.0018538		1.49698	0.00203775		1.50044	0.00214896		1.49681	0.00116431
1.50277	0.00165388		1.50312	0.00437801		1.50594	0.00131026		1.50486	0.00128301		1.49815	0.0021648		1.50152	0.00126804		1.49748	0.00186283		1.50113	0.00210144		1.50409	0.000342415		1.50258	0.00192483		1.50574	0.00154686		1.49655	0.00121526		1.50042	0.0021359		1.5048	0.00256017		1.50794	0.00149225		1.504	0.000945786
1.50684	0.00104194		1.50937	0.00341226		1.51157	0.00183898		1.50892	0.00140888		1.50597	0.0023379		1.50965	0.00149189		1.5056	0.00231371		1.50613	0.00292776		1.5119	0.000646737		1.50726	0.00149573		1.51074	0.000941675		1.50405	0.00104867		1.50823	0.0015028		1.51167	0.00224636		1.51544	0.00161829		1.51087	0.00117611
1.51215	0.000466562		1.51375	0.00325736		1.51594	0.00151946		1.51486	0.00221984		1.51097	0.00239403		1.51558	0.000559626		1.51123	0.00250814		1.51394	0.00106436		1.51846	0.00105695		1.51195	0.0017414		1.51542	0.0013323		1.50873	0.000964153		1.51355	0.00230783		1.51574	0.00225837		1.52044	0.00199147		1.51555	0.00125304
1.52027	0.000822945		1.51938	0.0028906		1.52188	0.00122586		1.52267	0.000999871		1.51534	0.00334958		1.51933	0.00121442		1.5156	0.00253821		1.52144	0.00080293		1.52284	0.00124376		1.51883	0.00208635		1.5223	0.00102596		1.51342	0.000856411		1.51792	0.00180207		1.52105	0.00250277		1.52482	0.00200135		1.52025	0.00165491
1.52715	0.00164079		1.52719	0.00353126		1.53	0.00132912		1.52955	0.000766575		1.52222	0.0024335		1.5259	0.00133841		1.52154	0.00331111		1.52613	0.000879173		1.52846	0.000690642		1.52664	0.00153956		1.53011	0.000876754		1.5206	0.00184645		1.52448	0.00128337		1.52886	0.00273605		1.532	0.0021912		1.52743	0.00182536
1.5309	0.00214459		1.53406	0.00339143		1.53657	0.00114355		1.53392	0.00130623		1.53003	0.00178468		1.53433	0.00134802		1.52966	0.00303816		1.5305	0.00103729		1.5369	0.00101735		1.53226	0.000903792		1.53574	0.00194167		1.52842	0.0016876		1.53261	0.000987892		1.53605	0.00225291		1.53981	0.00271333		1.53525	0.000727477
1.53559	0.00165575		1.53844	0.00303531		1.54063	0.0012249		1.53892	0.000715137		1.53534	0.00324474		1.53996	0.00126513		1.53591	0.00305362		1.538	0.00156362		1.54346	0.000696883		1.53633	0.00103748		1.5398	0.00212102		1.53311	0.00136172		1.53824	0.00096537		1.54043	0.00208641		1.5445	0.00214267		1.54056	0.00056686
1.54309	0.00120738		1.54375	0.0042005		1.54594	0.00126949		1.54673	0.00125547		1.53972	0.00339872		1.54339	0.00158974		1.53998	0.00286232		1.5455	0.00171199		1.5469	0.00137332		1.54289	0.00129213		1.54636	0.00101628		1.53748	0.000788048		1.54199	0.00104944		1.54542	0.00177915		1.54825	0.00183465		1.54493	0.00202968
1.55027	0.00110571		1.55187	0.00322146		1.55375	0.0008046		1.55392	0.00159369		1.54659	0.00240677		1.54902	0.00106966		1.54591	0.00166297		1.5505	0.00164766		1.55159	0.00148739		1.55102	0.000971948		1.55448	0.00103895		1.54498	0.000932516		1.54886	0.00120086		1.55355	0.00198385		1.55481	0.00131926		1.5515	0.00147812
1.55496	0.0014813		1.55875	0.00306589		1.56094	0.00154194		1.55861	0.0010793		1.55472	0.00149748		1.55683	0.000835082		1.55404	0.00149298		1.55519	0.000711526		1.5594	0.000972795		1.55664	0.00128359		1.56011	0.00121984		1.55279	0.00149623		1.55698	0.00117811		1.56073	0.00223196		1.56263	0.00191261		1.55962	0.00113284
1.55965	0.00127693		1.5625	0.00321281		1.56532	0.00148974		1.5633	0.0014981		1.56003	0.00218927		1.56277	0.00135941		1.5606	0.00192485		1.56238	0.00185538		1.56596	0.00102445		1.5607	0.000854263		1.56417	0.000746473		1.55748	0.00187521		1.56261	0.00134492		1.56449	0.00204364		1.56794	0.0023269		1.56524	0.00118944
1.56652	0.000449049		1.56719	0.00272772		1.57032	0.000979695		1.57111	0.00153338		1.56347	0.00223737		1.56714	0.00142219		1.56404	0.00226045		1.57019	0.00137432		1.57065	0.000943525		1.56727	0.00112185		1.57042	0.000910425		1.56123	0.00144512		1.56604	0.00171733		1.56886	0.00224833		1.57232	0.00207302		1.5693	0.00182995
1.57434	0.00143029		1.57438	0.00305392		1.57813	0.00151508		1.57861	0.0013868		1.56972	0.00256178		1.57277	0.00181806		1.56904	0.00263657		1.57488	0.00113498		1.57565	0.000736699		1.57539	0.00080846		1.57886	0.00155479		1.5681	0.0012522		1.57198	0.00104855		1.57605	0.00177348		1.57856	0.00161694		1.57587	0.00202924
1.57996	0.00134324		1.58156	0.00254778		1.58532	0.00122662		1.58299	0.00126162		1.57722	0.00250689		1.58027	0.00210692		1.57685	0.00296966		1.57863	0.00189784		1.58284	0.00125646		1.58101	0.00155928		1.58449	0.00136993		1.5756	0.00210596		1.5798	0.00118034		1.58323	0.00139138		1.58638	0.0014799		1.584	0.00180482
1.58402	0.00113376		1.58656	0.00280927		1.58938	0.000555389		1.58705	0.000524176		1.58315	0.00317401		1.58746	0.00181672		1.58341	0.00222975		1.58519	0.00263167		1.59034	0.00155281		1.58476	0.00137914		1.58824	0.000880496		1.58092	0.00101725		1.58573	0.000991238		1.58824	0.00166284		1.59263	0.00202472		1.58962	0.00108564
1.59059	0.00140751		1.59125	0.00227366		1.59375	0.000569869		1.59392	0.000884703		1.58753	0.00264422		1.59215	0.00125888		1.5881	0.00235568		1.59269	0.00271549		1.59534	0.00116413		1.59039	0.000894806		1.59386	0.000996032		1.58529	0.00108097		1.58979	0.00133377		1.59261	0.00245346		1.597	0.00185262		1.59305	0.00108411
1.59871	0.00100029		1.59812	0.00344372		1.60094	0.000974741		1.60142	0.00163352		1.59315	0.00224457		1.59714	0.00135137		1.5931	0.00242648		1.59832	0.00252056		1.59971	0.00143939		1.59789	0.000930528		1.60136	0.00115316		1.59154	0.00121924		1.59542	0.00108847		1.59948	0.00207375		1.60231	0.00218356		1.599	0.00230262
1.60465	0.00132504		1.60593	0.00398045		1.60844	0.00101628		1.60642	0.00104312		1.60097	0.00186897		1.60464	0.00229837		1.60029	0.00280218		1.60269	0.00188397		1.60659	0.000125043		1.60445	0.000657681		1.60761	0.00157987		1.59967	0.00215596		1.60323	0.00122918		1.60761	0.00150551		1.61013	0.00215907		1.6065	0.00169162
1.60871	0.00143216		1.61125	0.00377258		1.61344	0.000338759		1.6108	0.00128187		1.60784	0.00136302		1.61215	0.00178857		1.6081	0.00267165		1.60863	0.000839752		1.61471	0.00115961		1.60882	0.000564979		1.61199	0.0013422		1.60592	0.00131304		1.61042	0.0014669		1.61323	0.00198319		1.617	0.00246305		1.61274	0.00150631
1.61496	0.00149218		1.61531	0.00292761		1.61782	0.000858138		1.61736	0.000870591		1.61222	0.000976731		1.61714	0.00135315		1.6131	0.00292477		1.61675	0.00114147		1.62002	0.00164493		1.61414	0.00107101		1.6173	0.000700479		1.60998	0.00118871		1.6148	0.00162634		1.6173	0.00211958		1.62138	0.00243025		1.61712	0.0011842
1.6234	0.00127318		1.62187	0.0027029		1.62438	0.00117251		1.62517	0.00128461		1.61753	0.00217385		1.62152	0.000437871		1.61716	0.00181542		1.623	0.00130154		1.62409	0.00152247		1.62164	0.00114201		1.62511	0.00114722		1.61561	0.00152256		1.6198	0.00142051		1.62355	0.00163666		1.62669	0.00247945		1.62243	0.000209349
1.62902	0.000753743		1.63	0.00282966		1.63251	0.00144211		1.63111	0.00122975		1.62534	0.00176864		1.62902	0.00109177		1.62435	0.00213849		1.62738	0.00174773		1.63096	0.00162082		1.62883	0.00175893		1.6323	0.000911085		1.62342	0.00150995		1.6273	0.00120599		1.63167	0.00246611		1.63482	0.0023415		1.63025	0.000729444
1.63246	0.00129852		1.63594	0.00203743		1.63813	0.00180697		1.63517	0.00103424		1.63253	0.00237018		1.63683	0.00199611		1.63216	0.00194281		1.633	0.00150904		1.6394	0.00115014		1.63351	0.00161254		1.63699	0.0012106		1.63029	0.000680306		1.6348	0.000634882		1.63761	0.00227604		1.64169	0.00206179		1.63743	0.000994081
1.63809	0.00119956		1.63969	0.00242147		1.64219	0.00153165		1.64142	0.000918843		1.63722	0.00272954		1.64121	0.00109713		1.63748	0.00152973		1.64081	0.0011588		1.6444	0.000963756		1.63851	0.00181087		1.64167	0.00142935		1.63436	0.00145906		1.63917	0.000801687		1.64167	0.00213813		1.64544	0.00156707		1.64181	0.00088875
1.6459	0.000676379		1.64594	0.00295331		1.64844	0.00136494		1.64955	0.00154225		1.6419	0.00162823		1.64527	0.001766		1.64154	0.00202092		1.64769	0.00189329		1.64815	0.00108858		1.64601	0.00201162		1.64886	0.00162829		1.63998	0.00177565		1.64386	0.0012497		1.64792	0.00244167		1.65013	0.00101011		1.6468	0.00073294
1.65184	0.00110247		1.65437	0.00223687		1.65688	0.0016837		1.65611	0.000890848		1.64972	0.00154147		1.65183	0.00161856		1.64841	0.00149653		1.65175	0.00166824		1.6544	0.000778451		1.65352	0.000927241		1.65667	0.00192406		1.64811	0.00120243		1.65136	0.00155498		1.65605	0.0028731		1.65732	0.00179466		1.65431	0.00126396
1.65621	0.00107544		1.66	0.00302534		1.66282	0.00142934		1.65986	0.001339		1.65722	0.00187657		1.65933	0.00147558		1.65685	0.00166798		1.65707	0.00154716		1.6619	0.000739066		1.6582	0.00124589		1.66136	0.00133164		1.65498	0.000883402		1.65917	0.00182593		1.6623	0.00240217		1.6645	0.00198158		1.66181	0.00147484
1.66184	0.000613808		1.66375	0.00361369		1.66688	0.00140686		1.6658	0.00202205		1.66159	0.00158629		1.66464	0.00141258		1.66185	0.00151804		1.66519	0.00128854		1.66784	0.000749612		1.66289	0.000940171		1.66574	0.00105369		1.65873	0.000382741		1.66355	0.00167652		1.66574	0.0021019		1.66919	0.00187779		1.66649	0.00218768
1.66934	0.00104891		1.66937	0.00372383		1.67282	0.000814698		1.67423	0.00144325		1.66565	0.00255891		1.66902	0.0019139		1.6656	0.00146687		1.67238	0.00145013		1.67221	0.00096806		1.67039	0.00087048		1.67324	0.00108076		1.66342	0.000668359		1.6673	0.000345428		1.67105	0.00219312		1.67388	0.00139789		1.67118	0.00176636
1.67652	0.000934485		1.67687	0.00351708		1.68126	0.00129007		1.68049	0.00146692		1.67253	0.00177275		1.67558	0.00114047		1.67185	0.00269692		1.67613	0.00220346		1.67784	0.00111828		1.6782	0.00119812		1.68105	0.00110144		1.67092	0.000465926		1.67417	0.000579578		1.67886	0.00268717		1.68107	0.00198495		1.67868	0.0017574
1.68121	0.000647984		1.68313	0.00424593		1.68719	0.0016473		1.68392	0.000549667		1.68003	0.00122569		1.68339	0.00136969		1.67935	0.00286796		1.68082	0.00203906		1.68565	0.00082623		1.68289	0.00094039		1.68574	0.00119101		1.67779	0.00131526		1.68167	0.000799457		1.68542	0.00186906		1.68857	0.00199169		1.68618	0.000941634
1.68621	0.00131603		1.6875	0.0028414		1.69094	0.00215659		1.68892	0.00076521		1.68534	0.00175713		1.68965	0.00149211		1.68529	0.00232206		1.688	0.0013349		1.69252	0.00159349		1.68664	0.000179925		1.68949	0.000370376		1.68248	0.00168804		1.68667	0.000608345		1.68949	0.00151794		1.69388	0.0026857		1.69087	0.000773805
1.69371	0.0014728		1.69312	0.00362721		1.69625	0.00115574		1.69674	0.00171523		1.68972	0.0025955		1.69371	0.00118292		1.68966	0.00100722		1.69519	0.00186231		1.6969	0.00143078		1.69351	0.000860399		1.69605	0.00113732		1.68717	0.00119645		1.69136	0.00202128		1.6948	0.00240501		1.69825	0.00211167		1.69462	0.00145736
1.70121	0.00079234		1.70062	0.0036968		1.70375	0.000958927		1.7033	0.000883792		1.69628	0.00332985		1.69933	0.00141057		1.6956	0.00154372		1.69988	0.00134269		1.70221	0.000761449		1.70101	0.00176507		1.70355	0.00133648		1.69436	0.000484068		1.69761	0.00203109		1.70261	0.00245346		1.70482	0.00179017		1.70149	0.00149429
1.7059	0.00109669		1.70781	0.00245847		1.71032	0.000562629		1.70799	0.000180264		1.7044	0.00283665		1.70746	0.000701934		1.70341	0.00186116		1.70457	0.00106393		1.71002	0.00115832		1.70633	0.00122463		1.70886	0.00126077		1.70217	0.000575218		1.70542	0.00158687		1.7098	0.00263087		1.71294	0.00202966		1.709	0.00149516
1.71027	0.000804242		1.71219	0.00272373		1.715	0.000699238		1.71298	0.000238303		1.71034	0.00285392		1.71402	0.00171194		1.70998	0.00237093		1.71175	0.00166131		1.71721	0.000516744		1.7107	0.00111549		1.71324	0.00148656		1.70749	0.00122698		1.71167	0.00210959		1.71448	0.0029462		1.71856	0.00192272		1.71399	0.0018789
1.71809	0.00106218		1.71719	0.00280639		1.72	0.00099951		1.72017	0.00045908		1.7144	0.00241089		1.71808	0.00119856		1.71435	0.00207354		1.71957	0.000851015		1.72159	0.00118995		1.71726	0.00137147		1.71949	0.00148679		1.71155	0.000878977		1.71573	0.00177865		1.71917	0.00226491		1.72263	0.00168659		1.71837	0.00164901
1.7259	0.00109448		1.72469	0.00337702		1.7275	0.00108849		1.72767	0.000766348		1.72065	0.00143169		1.72371	0.00105603		1.71966	0.00275352		1.72488	0.00136045		1.72659	0.00124785		1.72539	0.00144883		1.72761	0.00162521		1.71842	0.00116482		1.72167	0.000930804		1.72636	0.002472		1.72919	0.00186049		1.72493	0.00225214
1.73027	0.00155747		1.73219	0.00330567		1.735	0.00102409		1.73267	0.000994636		1.72878	0.00213561		1.73215	0.00158147		1.72748	0.00241625		1.72925	0.000949568		1.7344	0.00152828		1.73164	0.00136117		1.73386	0.000906903		1.72654	0.00080265		1.7298	0.00154629		1.73417	0.00317882		1.73763	0.00141766		1.73274	0.00210682
1.73402	0.00132385		1.73687	0.0024957		1.73969	0.00121538		1.73736	0.000722647		1.73503	0.00205975		1.73871	0.00104933		1.73466	0.00255596		1.73582	0.00159893		1.7419	0.00151967		1.7357	0.00201293		1.73792	0.000994491		1.73217	0.000606191		1.73605	0.00149187		1.73948	0.00227168		1.74325	0.00181241		1.739	0.0012467
1.7409	0.00172291		1.74156	0.00226169		1.74438	0.00143772		1.74423	0.000815283		1.73909	0.00270446		1.74246	0.00129105		1.73904	0.0028097		1.74363	0.00207913		1.74596	0.000553762		1.74132	0.00216568		1.74386	0.00184704		1.73623	0.00114313		1.74042	0.00127623		1.74355	0.00218875		1.74669	0.00199551		1.74305	0.00224712
1.7484	0.00116913		1.74875	0.00242457		1.75157	0.000590065		1.75205	0.00134173		1.74472	0.00269007		1.74714	0.00147558		1.74404	0.00178973		1.74956	0.00137713		1.75002	0.000428934		1.74945	0.00176594		1.75167	0.00186794		1.7428	0.00145154		1.74604	0.00152733		1.75074	0.00159541		1.75232	0.00234487		1.74899	0.00183519
1.75371	0.000914931		1.75687	0.00229892		1.75938	0.00067466		1.75736	0.0014915		1.75284	0.00290326		1.75464	0.000611679		1.75185	0.00146228		1.75363	0.00062272		1.7569	0.0010124		1.75601	0.000786763		1.75855	0.000899201		1.75092	0.00111194		1.75417	0.000791875		1.75886	0.00159083		1.76013	0.00178904		1.7568	0.00179695
1.75809	0.00122048		1.76156	0.00267343		1.76438	0.00184355		1.76173	0.000841685		1.7594	0.00284611		1.76152	0.0012314		1.75935	0.00184591		1.75988	0.00113866		1.7644	0.000616821		1.76008	0.000962744		1.76261	0.000885117		1.75654	0.000894464		1.76074	0.000750397		1.76386	0.00225837		1.76638	0.00246238		1.76368	0.00219379
1.76434	0.00141091		1.76531	0.00272019		1.76907	0.00141962		1.76861	0.00160143		1.76315	0.00231981		1.76621	0.00144319		1.76341	0.00249581		1.76831	0.00186145		1.7694	0.00148653		1.7657	0.0011201		1.76792	0.00167604		1.7603	0.00120486		1.76449	0.000899139		1.7673	0.00155788		1.77075	0.00200877		1.76774	0.00120277
1.77246	0.000575211		1.77187	0.00287575		1.77625	0.0011948		1.77673	0.00159938		1.76815	0.00268596		1.77089	0.000698582		1.76748	0.00200045		1.77394	0.00215559		1.77377	0.00126011		1.77382	0.00205347		1.77605	0.000593526		1.76592	0.000934286		1.76948	0.00134425		1.77386	0.00136563		1.77638	0.00203236		1.77337	0.00138459
1.77871	0.00110826		1.77969	0.00328195		1.78407	0.00125234		1.78174	0.00131123		1.77565	0.00168682		1.77839	0.00167709		1.77466	0.00239891		1.77738	0.00168037		1.78065	0.000823002		1.7807	0.00137958		1.78292	0.00123107		1.77373	0.000838712		1.77698	0.000836029		1.78167	0.00142891		1.78388	0.00268412		1.78149	0.00239484
1.78277	0.00160831		1.785	0.00171699		1.78876	0.00124967		1.78549	0.00105654		1.78253	0.0026545		1.78589	0.00232742		1.78216	0.00177553		1.78332	0.000968412		1.78877	0.000551609		1.78445	0.000837388		1.78667	0.00079973		1.77998	0.00102411		1.78386	0.00170439		1.78698	0.00201309		1.79107	0.00173063		1.78805	0.00199756
1.7884	0.00115331		1.78906	0.00264839		1.79251	0.00132341		1.79173	0.000542157		1.7869	0.00264278		1.79121	0.00175461		1.78716	0.00137833		1.79113	0.000763509		1.7944	0.000666752		1.78914	0.00128468		1.79136	0.00114568		1.78436	0.00126017		1.78824	0.00188502		1.79136	0.00232471		1.79544	0.00173108		1.79181	0.00221412
1.79652	0.00062486		1.79562	0.00248795		1.79907	0.00135027		1.79923	0.00107953		1.7919	0.00222894		1.79558	0.00069121		1.79154	0.00272804		1.79706	0.00194375		1.79846	0.00111054		1.79664	0.00226408		1.79917	0.00139414		1.78998	0.00172366		1.79323	0.0015144		1.79761	0.00140032		1.80044	0.0022249		1.79649	0.00183432
1.80309	0.00103089		1.80344	0.00245293		1.80657	0.00138323		1.80517	0.00151039		1.7994	0.00227726		1.80214	0.000888476		1.79841	0.00292268		1.80144	0.00193531		1.80471	0.00156594		1.80351	0.0020366		1.80574	0.00147468		1.7978	0.00193583		1.80042	0.00259194		1.80542	0.00135995		1.80794	0.00266525		1.8043	0.00200368
1.80715	0.00114991		1.80969	0.00238534		1.81219	0.000575204		1.80924	0.00126116		1.8069	0.00184121		1.81027	0.00139694		1.80654	0.00291892		1.80707	0.001866		1.81284	0.00148567		1.8082	0.000675433		1.81042	0.0014716		1.80498	0.00204711		1.80823	0.00178222		1.81167	0.00249972		1.81544	0.00304944		1.81118	0.00226285
1.81277	0.0010717		1.81375	0.00287088		1.81657	0.000827654		1.81517	0.000825297		1.8119	0.00178365		1.81589	0.000993029		1.81216	0.0015951		1.81457	0.0016834		1.81909	0.000843448		1.81289	0.00157747		1.81511	0.00168177		1.80935	0.00104114		1.81323	0.0012071		1.81604	0.00265837		1.82013	0.002377		1.81556	0.000840456
1.82121	0.00225715		1.81937	0.00288129		1.8225	0.00143525		1.8233	0.000662787		1.81659	0.00232166		1.81996	0.000577051		1.81623	0.00129103		1.82175	0.00215234		1.82315	0.00113916		1.82007	0.00139711		1.8223	0.00100395		1.81405	0.0013542		1.81761	0.0013583		1.82136	0.00287833		1.82481	0.00167221		1.82055	0.00132908
1.82777	0.0016044		1.8275	0.00219255		1.83063	0.00105152		1.82986	0.000564234		1.82347	0.00299783		1.82683	0.00104709		1.82248	0.00156482		1.82644	0.00166153		1.82909	0.00104984		1.82789	0.00139776		1.83011	0.00105963		1.82186	0.0012449		1.82448	0.00183931		1.82949	0.00268128		1.83231	0.00232915		1.82774	0.00190862
1.83121	0.00102732		1.83406	0.00285625		1.83688	0.000904246		1.83392	0.000439734		1.83128	0.00265841		1.83496	0.00106295		1.8306	0.00196411		1.83144	0.000754629		1.83721	0.00108234		1.8332	0.00199014		1.83542	0.00159814		1.82936	0.0011949		1.83261	0.00176706		1.83636	0.0022815		1.84013	0.00247361		1.83555	0.000979876
1.83621	0.00137282		1.83812	0.00291631		1.84125	0.00136666		1.83923	0.000602699		1.83659	0.00236545		1.84027	0.00100196		1.83685	0.00179976		1.83894	0.0012619		1.84346	0.000977961		1.83758	0.00189064		1.8398	0.00107196		1.83404	0.00159048		1.83792	0.000818412		1.84073	0.00196901		1.8445	0.00255921		1.84056	0.00144184
1.84371	0.00157703		1.84375	0.00290811		1.84688	0.00159129		1.84705	0.00125024		1.84065	0.00145533		1.84371	0.00108842		1.84091	0.00209819		1.84644	0.0012279		1.8469	0.00158165		1.84414	0.00119023		1.84636	0.00125505		1.83873	0.00188295		1.84198	0.00160627		1.84574	0.00179072		1.84825	0.00201146		1.84493	0.000961083
1.85059	0.00128288		1.85187	0.00331475		1.85469	0.000695427		1.85423	0.00139112		1.84753	0.0020028		1.84996	0.00145078		1.84685	0.00270925		1.85113	0.000995053		1.85221	0.00224432		1.85226	0.000952443		1.85449	0.00102772		1.84623	0.00163849		1.84886	0.00174609		1.85386	0.00209186		1.85513	0.00310223		1.85149	0.000889843
1.85527	0.000703074		1.85875	0.00263376		1.86157	0.000925204		1.85892	0.000688734		1.85566	0.00199458		1.85746	0.00104709		1.85529	0.00171351		1.85581	0.00138125		1.86002	0.00166989		1.85757	0.00217138		1.86011	0.000674951		1.85405	0.00108473		1.85698	0.00134514		1.86105	0.00219967		1.86263	0.00369918		1.85962	0.00158716
1.85996	0.000982433		1.8625	0.00270778		1.86594	0.000728388		1.86361	0.000764072		1.86065	0.00238046		1.86339	0.00126916		1.86154	0.00146708		1.863	0.000648496		1.86659	0.00094331		1.86164	0.00197743		1.86417	0.000748674		1.85842	0.00104535		1.8623	0.00140602		1.8648	0.0012515		1.86794	0.00325726		1.86493	0.00131357
1.86746	0.00108632		1.86719	0.00192419		1.87125	0.00134417		1.87142	0.00108204		1.8644	0.00214568		1.86746	0.00107636		1.86498	0.0025144		1.87081	0.000739034		1.87096	0.00118199		1.86851	0.00208328		1.87073	0.00211574		1.86217	0.00124114		1.86573	0.0011567		1.86918	0.00249492		1.87232	0.00318851		1.86931	0.000821444
1.87496	0.0010802		1.87469	0.00175067		1.87907	0.000865569		1.87892	0.00101922		1.87065	0.00214034		1.8734	0.00131674		1.87029	0.00288905		1.8755	0.000823291		1.87596	0.00164966		1.87664	0.00115691		1.87886	0.00101694		1.86936	0.0010157		1.87198	0.00195594		1.87668	0.00185837		1.87888	0.00237498		1.87618	0.00128035
1.87996	0.00045381		1.88187	0.00289658		1.88626	0.000895863		1.8833	0.00174642		1.87847	0.00176473		1.88121	0.000970018		1.8781	0.00229053		1.87925	0.00119129		1.88346	0.00158273		1.88226	0.000835634		1.88449	0.00114942		1.87686	0.000844022		1.87948	0.00216935		1.88386	0.00126568		1.88669	0.00217637		1.88431	0.000819258
1.88434	0.000913401		1.88625	0.00319087		1.89	0.000628171		1.88736	0.00144074		1.88409	0.00163789		1.88808	0.000747731		1.88466	0.00270528		1.88613	0.00181834		1.89096	0.00203792		1.8857	0.00101863		1.88824	0.00143287		1.88217	0.00150552		1.88542	0.00115916		1.88855	0.00216453		1.89294	0.00185981		1.88962	0.000663449
1.89121	0.000982604		1.89125	0.00250567		1.89469	0.000248258		1.89455	0.000917933		1.88847	0.00159883		1.89246	0.00134265		1.88904	0.00242147		1.89363	0.00149648		1.89596	0.00086497		1.89164	0.00126189		1.89386	0.000476009		1.88624	0.00143915		1.8898	0.00123342		1.89324	0.00232689		1.897	0.00205954		1.89306	0.00142982
1.89934	0.00102817		1.89844	0.00270445		1.90188	0.000405063		1.90173	0.00154658		1.8944	0.00219009		1.89746	0.00174009		1.89435	0.00230702		1.89894	0.000807695		1.90034	0.00111333		1.89914	0.00089897		1.90167	0.000662848		1.8928	0.00119181		1.89542	0.00105881		1.90043	0.00252569		1.90263	0.00204472		1.8993	0.00103844
1.90465	0.00131314		1.90594	0.00348361		1.90907	0.00127368		1.90674	0.000722192		1.90253	0.00275832		1.90527	0.00262566		1.90185	0.00232561		1.903	0.00143561		1.90752	0.000662233		1.90539	0.00126978		1.90761	0.00106447		1.90092	0.0012053		1.90323	0.00116362		1.90824	0.00219399		1.91075	0.00218311		1.9068	0.000812266
1.90871	0.00118494		1.91094	0.0025777		1.91376	0.00193748		1.91111	0.000708308		1.90909	0.00281383		1.91246	0.00126759		1.90935	0.00291516		1.90956	0.00218461		1.91534	0.000467673		1.90977	0.0014874		1.91199	0.000530586		1.90686	0.000980525		1.91011	0.00148741		1.91355	0.00284844		1.91732	0.00221344		1.91274	0.00137279
1.91559	0.00153435		1.91531	0.00321769		1.91844	0.00189118		1.91798	0.000679403		1.91347	0.0026837		1.91714	0.00149077		1.91404	0.00278526		1.91769	0.00223291		1.92065	0.00104984		1.91539	0.00134692		1.91761	0.00150109		1.91092	0.00120729		1.91448	0.00167919		1.91761	0.00145073		1.92138	0.00247316		1.91712	0.00204126
1.92371	0.00121861		1.92218	0.0027388		1.92532	0.00177591		1.9258	0.00123044		1.91878	0.00267424		1.92214	0.00100286		1.91841	0.00288028		1.92394	0.00211985		1.92471	0.00185584		1.9232	0.000981591		1.92542	0.00170443		1.91686	0.000822561		1.91948	0.00165734		1.92418	0.00122466		1.927	0.00291441		1.92274	0.00175893
1.92934	0.000864943		1.93	0.00246645		1.93344	0.00137599		1.93173	0.0015204		1.92659	0.00239053		1.92964	0.00109289		1.9256	0.0019284		1.928	0.00152377		1.9319	0.00158144		1.93039	0.00129082		1.93261	0.000698278		1.92499	0.00147211		1.9273	0.00160717		1.9323	0.00230878		1.93513	0.00341834		1.93055	0.00177641
1.93277	0.00141193		1.93562	0.00228695		1.93875	0.000983124		1.9358	0.0025271		1.93378	0.00190412		1.93714	0.000999284		1.93341	0.0025167		1.93363	0.0013102		1.93971	0.000958806		1.93477	0.00228578		1.93698	0		1.93155	0.00156371		1.93448	0.00161296		1.93824	0.00199432		1.94169	0.00287419		1.93743	0.00162213
1.93902	0.0017003		1.93969	0.00228008		1.94313	0.00132093		1.94205	0.0013843		1.93815	0.00221517		1.94152	0.00190183		1.93873	0.00262968		1.94175	0.00102343		1.94502	0.000607567		1.93945	0.00158185		1.94167	0.000572179		1.93561	0.00161703		1.93917	0.00211583		1.9423	0.00170147		1.94544	0.00324265		1.94181	0.00199494
1.94652	0.00155884		1.94625	0.00279509		1.94969	0.0011163		1.95017	0.000364624		1.94315	0.00346677		1.94558	0.00205442		1.94279	0.00226943		1.94831	0.00126277		1.94877	0.000912534		1.94726	0.00129652		1.94949	0.000854307		1.94124	0.00228583		1.94386	0.00169057		1.94854	0.00118167		1.95044	0.00233386		1.94681	0.00129237
1.95246	0.00165677		1.95469	0.00194657		1.9575	0.00179249		1.95611	0.000197789		1.95097	0.00217714		1.95246	0.0016085		1.94998	0.00224625		1.95238	0.00196693		1.95502	0.00136708		1.95476	0.00201709		1.95698	0.000949377		1.94936	0.0031168		1.95167	0.00168276		1.95698	0.00116399		1.95794	0.00117906		1.95462	0.00135378
1.95652	0.0015165		1.96	0.00284695		1.96344	0.00137161		1.96017	0.000855114		1.95847	0.0021354		1.95996	0.00151222		1.9581	0.00268251		1.958	0.00174513		1.96252	0.00132124		1.95945	0.00246351		1.96136	0.000354971		1.95592	0.00183782		1.95917	0.00092233		1.96261	0.00193736		1.96481	0.00151742		1.96212	0.00153647
1.96246	0.00185962		1.96344	0.00238003		1.9675	0.00075049		1.96642	0.00102036		1.96253	0.0019882		1.96496	0.00111925		1.9631	0.00190982		1.96644	0.00255305		1.96846	0.00130875		1.96414	0.00163971		1.96605	0.000635999		1.95967	0.00136968		1.96323	0.00150525		1.96605	0.00300228		1.96919	0.00298406		1.9665	0.00128997
1.97027	0.00133763		1.96969	0.00174003		1.97375	0		1.97455	0.00051803		1.9669	0.00230994		1.96933	0.00154975		1.96654	0.00253027		1.973	0.00205205		1.97283	0.000896177		1.97195	0.00202455		1.97386	0.00103344		1.96467	0.000702429		1.9673	0.00110073		1.97168	0.00276944		1.97419	0.00235611		1.97118	0.00158673
1.97715	0.000706815		1.97719	0.00253138		1.98219	0.000573108		1.9808	0.00154316		1.97409	0.00194462		1.97621	0.00179549		1.9731	0.00336458		1.97675	0.00194614		1.97877	0.000208764		1.97945	0.00205786		1.98167	0.000422752		1.97217	0.00161149		1.97448	0.00136811		1.97949	0.00192405		1.98138	0.00206583		1.97899	0.00088438
1.98152	0.00131093		1.98312	0.0020669		1.98782	0.000917964		1.98423	0.00145827		1.98128	0.00240945		1.98402	0.00190608		1.98091	0.00330213		1.98144	0.00146464		1.98658	0.00207881		1.98382	0.00192461		1.98574	0.000775523		1.97905	0.00129579		1.98167	0.00143947		1.98605	0.0017569		1.98919	0.00214222		1.98649	0.000739059
1.98652	0.0008476		1.9875	0.0022156		1.99125	0.00101894		1.98955	0.000771583		1.98628	0.00269274		1.98996	0.00160694		1.98623	0.00205266		1.98894	0.000653911		1.99315	0.00198175		1.98789	0.00184046		1.9898	0.00178058		1.98373	0.00156061		1.98699	0.00095132		1.99042	0.00224877		1.99419	0.00329096		1.99087	0.000513757
1.99434	0.00120976		1.99312	0.00338611		1.99719	0.00146764		1.99736	0.000762023		1.99065	0.00222278		1.99402	0.00119007		1.9906	0.00182983		1.99581	0.000985956		1.99752	0.00138882		1.99476	0.00149375		1.99667	0.00191724		1.98842	0.00155773		1.99136	0.00161943		1.99573	0.00286633		1.99857	0.00257898		1.99493	0.0016584
2.00152	0.00113682		2.00094	0.00160175		2.00469	0.00103609		2.00392	0.000476378		1.99753	0.00211896		1.99996	0.00151535		1.99685	0.00256285		2.0005	0.00198599		2.00283	0.00143315		2.00226	0.00171554		2.00417	0.00139414		1.99561	0.00129247		1.99792	0.00152577		2.00323	0.00241636		2.00544	0.00153696		2.00181	0.00222067
2.00621	0.00119616		2.00812	0.00186812		2.01094	0.00125901		2.0083	0.00138885		2.00565	0.00227438		2.00808	0.00132813		2.00466	0.0029208		2.00519	0.00160564		2.01065	0.00142992		2.00757	0.00139272		2.00917	0.000747574		2.00342	0.00213738		2.00605	0.00135138		2.01043	0.00138527		2.01357	0.00295328		2.00931	0.00150347
2.0109	0.00139		2.0125	0.00254313		2.01532	0.001042		2.0133	0.000817104		2.01128	0.00214568		2.01465	0.000922656		2.01123	0.00265161		2.01269	0.00128486		2.01752	0.000814178		2.01195	0.00119768		2.01386	0.00135254		2.00842	0.0019626		2.01167	0.000816182		2.01511	0.00156486		2.01888	0.00259718		2.0143	0.00139399
2.01871	0.00114277		2.0175	0.00154502		2.02063	0.000721911		2.0208	0.00139112		2.01534	0.00176042		2.01871	0.00090389		2.0156	0.00217859		2.0205	0.00130392		2.0219	0.000661372		2.01851	0.00103506		2.02042	0.00111487		2.01279	0.00120973		2.01605	0.00170216		2.0198	0.000735404		2.02294	0.00246215		2.01868	0.00155438
2.02621	0.000980223		2.025	0		2.02844	0.000350191		2.0283	0.00134264		2.02159	0.00196436		2.02433	0.00193177		2.02091	0.00242752		2.0255	0.0014811		2.0269	0.000601756		2.02664	0.00168442		2.02824	0.00122908		2.01967	0.00213738		2.02198	0.00236269		2.02729	0.00102564		2.02982	0.00270637		2.02556	0.00096305
2.03059	0.00113495		2.0325	0.00100653		2.03563	0.00112526		2.03298	0.00102582		2.03003	0.00161322		2.03277	0.00178053		2.02873	0.00194699		2.02988	0.00159525		2.03502	0.000729166		2.03258	0.000731317		2.03418	0.00114436		2.0278	0.00102278		2.03011	0.00176906		2.03479	0.00153911		2.03794	0.00282567		2.03337	0.000687705
2.03465	0.00121827		2.03719	0.00202723		2.04032	0.001046		2.03767	0.00140911		2.03597	0.00137947		2.03902	0.00192574		2.0356	0.00218339		2.03675	0.00169423		2.04221	0.00130875		2.03633	0.00101688		2.03824	0.00173854		2.03311	0.00144512		2.03636	0.00101777		2.0398	0.0015893		2.04325	0.00344216		2.03899	0.00111755
2.04152	0.00142995		2.04187	0.0032363		2.045	0.00128092		2.04486	0.00110115		2.03972	0.00239567		2.04246	0.00171753		2.03998	0.00305779		2.04488	0.00116053		2.04627	0.00109031		2.04258	0.00116502		2.04417	0.00207217		2.03717	0.000985613		2.04042	0.00121134		2.04417	0.00289143		2.04669	0.00274703		2.04337	0.00147899
2.04902	0.00114005		2.04937	0.0021582		2.0525	0.000997224		2.05267	0.00125297		2.04597	0.00263066		2.04777	0.00176109		2.04498	0.00281074		2.05019	0.00178672		2.05065	0.000585829		2.0507	0.00144401		2.0523	0.00166196		2.04404	0.000951764		2.04605	0.00124546		2.05167	0.00209448		2.05294	0.00314717		2.04931	0.00144687
2.05402	0.00163535		2.05687	0.00229914		2.06032	0.000694665		2.05767	0.00152496		2.05409	0.00285577		2.05527	0.00184487		2.0531	0.00201277		2.05425	0.00154348		2.05783	0.000871642		2.05695	0.00157944		2.05855	0.000885337		2.05217	0.00133959		2.05448	0.00150615		2.05948	0.00193409		2.06044	0.00318514		2.05743	0.0011936
2.0584	0.00155867		2.06125	0.00178967		2.06532	0.000246162		2.06205	0.00211946		2.06034	0.00180297		2.06183	0.00114427		2.06029	0.00158549		2.06113	0.00139511		2.06502	0.00116025		2.06101	0.00166711		2.06292	0.000911305		2.05748	0.00119225		2.06073	0.00143724		2.06418	0.00203295		2.06638	0.00332825		2.06368	0.000990365
2.06496	0.00109244		2.06531	0.00123544		2.06969	0.00082289		2.06923	0.00185954		2.06378	0.0017929		2.06652	0.00115477		2.06404	0.00203032		2.06925	0.00145338		2.07002	0.000630811		2.06664	0.00113456		2.06855	0.00112389		2.06092	0.00105707		2.06448	0.000238388		2.06792	0.00184418		2.07075	0.00344104		2.06806	0.00163677
2.07277	0.000656656		2.0725	0.0007765		2.07688	0.00171247		2.07705	0.00131624		2.06909	0.00290881		2.07152	0.00066887		2.06841	0.00224187		2.07488	0.00125822		2.0744	0.000663094		2.07477	0.000795749		2.07667	0.00181029		2.06717	0.00134468		2.06949	0.00128604		2.07448	0.00168161		2.07638	0.00402338		2.07368	0.00189048
2.07871	0.00138081		2.07969	0.00166735		2.08469	0.00147411		2.08205	0.000437685		2.0769	0.00273715		2.07871	0.000822125		2.07591	0.00184299		2.07831	0.00205227		2.08127	0.000176265		2.08133	0.00138834		2.08324	0.000817116		2.07467	0.00202432		2.0773	0.00229646		2.0823	0.0027426		2.08419	0.00252753		2.08212	0.00105374
2.08277	0.00142519		2.085	0.00199953		2.08938	0.00120376		2.0858	0.000607706		2.08347	0.00256549		2.08621	0.0020953		2.0831	0.00151971		2.08425	0.00192708		2.0894	0.000369533		2.08507	0.00118672		2.08699	0.000550392		2.08061	0.00270751		2.08386	0.00208862		2.08761	0.00193889		2.09107	0.00320693		2.08837	0.00101681
2.08902	0.00142604		2.08938	0.00273902		2.09313	0.00101285		2.09205	0.00121997		2.08784	0.00239691		2.09121	0.00116572		2.08779	0.00253424		2.09175	0.00211118		2.09471	0.000343922		2.09008	0.00137256		2.09199	0.000393923		2.08498	0.000917251		2.08792	0.00128158		2.09198	0.00205302		2.09544	0.00341273		2.09181	0.00178712
2.09715	0.00129257		2.09594	0.00217105		2.1	0.000803837		2.09986	0.00110161		2.09284	0.00217488		2.0959	0.00174433		2.09248	0.00323322		2.09769	0.00167062		2.09877	0.000924586		2.09758	0.00204339		2.09949	0.0010363		2.0906	0.00079203		2.09324	0.000960464		2.09823	0.00229132		2.10044	0.00323816		2.09712	0.0014862
2.1034	0.000845729		2.10375	0.00163366		2.1075	0.00116546		2.10517	0.00135698		2.10065	0.00168456		2.10277	0.0021478		2.09935	0.00337585		2.10207	0.00167994		2.10533	0.00155389		2.10445	0.00263116		2.10605	0.00165602		2.09842	0.00212233		2.10074	0.00106215		2.10605	0.002036		2.10825	0.00262009		2.10462	0.00140491
2.10746	0.00112339		2.10968	0.00172541		2.11282	0.00172809		2.10955	0.000721965		2.10815	0.00128984		2.1109	0.00195657		2.10748	0.0030131		2.10769	0.00146572		2.11346	0.000734762		2.10914	0.00110059		2.11074	0.0013904		2.10561	0.00194291		2.10824	0.0010936		2.1123	0.00283578		2.11544	0.00403416		2.11118	0.000253055
2.1134	0.000844709		2.11375	0.00189892		2.11719	0.00205313		2.1158	0.000671891		2.11284	0.00185725		2.11621	0.00127273		2.1131	0.00256243		2.1155	0.00104942		2.1194	0.000799758		2.11414	0.00139733		2.11574	0.00186002		2.10998	0.00108141		2.11323	0.00140134		2.11667	0.00227844		2.12013	0.00391104		2.11555	0.000216123
2.12152	0.00116777		2.11969	0.00270778		2.12344	0.000342569		2.12361	0.000915657		2.11722	0.00203138		2.12027	0.00162437		2.11716	0.00227215		2.12269	0.00157315		2.12346	0.00136191		2.12133	0.00154087		2.12292	0.00168243		2.11498	0.00159291		2.11761	0.00105479		2.1223	0.00188608		2.12481	0.00353742		2.12056	0.000526432
2.12809	0.000744391		2.12781	0.00311287		2.13157	0.000817556		2.13017	0.00208896		2.12472	0.00232331		2.12715	0.00161476		2.12341	0.00237678		2.12707	0.00179885		2.12971	0.00175361		2.12883	0.00188078		2.13042	0.00113005		2.12279	0.00201547		2.12449	0.00115648		2.13011	0.00137261		2.13232	0.00350619		2.12806	0.00104937
2.13152	0.00119905		2.13406	0.00252518		2.13782	0.00083699		2.13424	0.00222097		2.13253	0.00258543		2.13527	0.00155377		2.13154	0.00217629		2.13206	0.00141785		2.13784	0.00112302		2.13383	0.0018604		2.13542	0.00191086		2.12998	0.00167875		2.13261	0.00120019		2.13698	0.0014815		2.13982	0.00406809		2.13556	0.00102904
2.13652	0		2.13812	0.00182602		2.14188	0.000427164		2.13986	0.00155546		2.13753	0.0022826		2.14027	0.00148005		2.13748	0.00249874		2.13988	0.00124956		2.14377	0.0012076		2.1382	0.00150953		2.1398	0.00101364		2.13467	0.00198008		2.13792	0.00219834		2.14105	0.00183698		2.14419	0.00302787		2.14055	0.00167654
2.14434	0.000394639		2.14375	0.00188031		2.14782	0.00108601		2.14767	0.00177305		2.14159	0.00170018		2.14402	0.00121196		2.14154	0.0025096		2.14706	0.00114516		2.14752	0.00110171		2.14508	0.00129104		2.14667	0.000716324		2.13936	0.00172587		2.14198	0.00185715		2.14636	0.00136453		2.14825	0.00386117		2.14493	0.000839582
2.1509	0.000960329		2.15219	0.00227255		2.15563	0.00126492		2.15455	0.00157002		2.14878	0.00146396		2.15027	0.00177807		2.1481	0.00226087		2.15175	0.00168189		2.15283	0.000985063		2.1532	0.00107385		2.1548	0.000804352		2.14748	0.000798889		2.14886	0.0020079		2.15448	0.00195395		2.15513	0.00475737		2.15212	0.000763534
2.15559	0.00104738		2.15875	0.00316495		2.1625	0.000971312		2.15892	0.00187957		2.1569	0.00206797		2.15777	0.00192082		2.15654	0.00259438		2.15644	0.00191776		2.16065	0.000908875		2.15851	0.00127548		2.16011	0.00164611		2.15498	0.000949773		2.15698	0.00181143		2.16167	0.00150551		2.16232	0.00457045		2.15993	0.00158389
2.16059	0.00127778		2.16219	0.00244296		2.16657	0.00147831		2.16392	0.00153315		2.16159	0.00209429		2.16371	0.00122425		2.16216	0.00181459		2.16425	0.00156102		2.16721	0.000810304		2.16289	0.000875521		2.16449	0.0011426		2.15905	0.00161172		2.16198	0.00181366		2.16543	0.00243796		2.16763	0.00399799		2.16524	0.00149779
2.16777	0.00115875		2.16719	0.00149006		2.17188	0.00125291		2.17173	0.0014412		2.16534	0.00207681		2.16808	0.000593806		2.1656	0.00202614		2.17175	0.00186989		2.17158	0.000671057		2.16976	0.00096384		2.17136	0.000742953		2.16311	0.000910392		2.16573	0.00106728		2.17011	0.00251849		2.172	0.00412538		2.16931	0.00087389
2.17527	0.0011375		2.175	0.00178103		2.18032	0.00113898		2.17892	0.0015814		2.1719	0.00187082		2.17402	0.000737902		2.17123	0.00206436		2.17613	0.00268127		2.1769	0.000247288		2.17789	0.00186325		2.17948	0.00164171		2.17029	0.00131304		2.17198	0.000908727		2.17761	0.00203273		2.17857	0.00403394		2.1765	0.00104587
2.18027	0.00100046		2.18156	0.00210236		2.18688	0.00101913		2.18298	0.00108841		2.1794	0.00161713		2.18183	0.00112394		2.17904	0.00190961		2.18019	0.00199877		2.1844	0.000978821		2.18289	0.00121959		2.1848	0.00136971		2.17779	0.00209954		2.17948	0.00219945		2.18448	0.00170561		2.18669	0.00458977		2.18462	0.00140207
2.18465	0.000821415		2.18594	0.0025593		2.19063	0.000274551		2.18767	0.00085352		2.18503	0.00183422		2.18839	0.00175483		2.1856	0.00220323		2.18706	0.00174102		2.19158	0.00133243		2.18664	0.000716634		2.18824	0.00134792		2.1828	0.000876322		2.18542	0.00177954		2.18918	0.00154828		2.19263	0.00394811		2.18962	0.00105396
2.19184	0.000997226		2.19094	0.00164364		2.19532	0.000405063		2.19486	0.00108295		2.1894	0.00228178		2.19246	0.00143648		2.18998	0.00113524		2.19425	0.00156666		2.19627	0.000734116		2.19288	0.000607933		2.19418	0.0014047		2.18717	0.000527209		2.18948	0.000519591		2.19386	0.00159432		2.19669	0.00313234		2.19337	0.00108586
2.19965	0.00185979		2.19844	0.00205028		2.20282	0.00139486		2.20173	0.000706488		2.19534	0.00230069		2.19777	0.000895625		2.19529	0.00227006		2.19956	0.00145554		2.20096	0.000725722		2.20039	0.000940171		2.20199	0.000468746		2.19404	0.0010688		2.19542	0.00144482		2.20105	0.00126197		2.20263	0.00408988		2.19962	0.00146042
2.20496	0.00114294		2.20594	0.00236473		2.20969	0.00153413		2.20673	0.000312958		2.20347	0.00167304		2.20558	0.00135651		2.2031	0.0030344		2.20394	0.00125042		2.20815	0.000379003		2.20633	0.00143502		2.20792	0.000597487		2.20217	0.00125597		2.20323	0.00141449		2.20886	0.000990286		2.21075	0.00464976		2.20712	0.000990584
2.20934	0.000949617		2.21094	0.00246002		2.21438	0.000963691		2.21142	0.000166152		2.21003	0.00165639		2.21277	0.00118873		2.21029	0.00285543		2.2105	0.00127447		2.21596	0.00150568		2.2107	0.00181701		2.2123	0.00196984		2.2081	0.00200353		2.21011	0.00111679		2.21386	0.00155548		2.217	0.0044817		2.21306	0.000312494
2.21621	0.000956419		2.21531	0.0018464		2.21907	0.00100332		2.2183	0.000880378		2.21409	0.00167202		2.21746	0.00164693		2.21498	0.00246574		2.21831	0.00141482		2.22096	0.0020801		2.21632	0.00193075		2.21793	0.00203234		2.21217	0.00261237		2.21417	0.00179984		2.21824	0.00174271		2.22107	0.00430062		2.21743	0.000169577
2.22434	0.000481185		2.22219	0.000983256		2.22626	0.00168293		2.22611	0.00103265		2.21972	0.00104971		2.22214	0.00158683		2.21966	0.00180728		2.22425	0.00156102		2.22533	0.00128357		2.22413	0.00230397		2.22574	0.00195443		2.21811	0.00210994		2.21948	0.00142074		2.22511	0.00213791		2.22669	0.00363403		2.22337	0.00104959
2.22934	0.000983114		2.23031	0.00169261		2.23407	0.00141505		2.23142	0.000975972		2.22753	0.00188171		2.22996	0.00123386		2.22716	0.00205475		2.22863	0.00129136		2.23252	0.000972795		2.23102	0.00173702		2.23261	0.00105633		2.22623	0.00146924		2.22761	0.00116919		2.23324	0.00136519		2.23513	0.00342171		2.23118	0.00161426
2.23309	0.00200499		2.23562	0.00177394		2.23938	0.00155185		2.23549	8.99044e-05		2.2344	0.00172362		2.23746	0.0015913		2.23466	0.0024033		2.23456	0.00124414		2.24065	0.00150719		2.23539	0.00135678		2.23699	0.00132746		2.23248	0.00138539		2.2348	0.00206632		2.23855	0.00189634		2.24169	0.00414492		2.23774	0.000854004
2.23934	0.00183292		2.23969	0.00184928		2.24376	0.00092387		2.24205	0.00126162		2.23878	0.00126722		2.24183	0.00172691		2.23966	0.00232373		2.24269	0.00150579		2.24533	0.000696237		2.2407	0.00100373		2.24198	0.000876534		2.23655	0.000789818		2.23886	0.00210044		2.24261	0.00210518		2.24513	0.00311796		2.24212	0.00131073
2.24684	0.00079421		2.24656	0.00182978		2.25032	0.000844801		2.25017	0.00204913		2.24409	0.00202891		2.24589	0.0014872		2.24404	0.00189269		2.24925	0.00110227		2.24908	0.00101519		2.24851	0.00138944		2.2498	0.00122116		2.24248	0.00113229		2.24386	0.00100194		2.24949	0.00161112		2.25013	0.00350799		2.24743	0.00125566
