# Supplementary material for: Binding and sequestration of poison frog alkaloids by a plasma globulin
Source: eLife journal article supplement (doi:10.7554/elife.85096), 2023-12-14
Supplement: fig5-data1 [file BSA+PTX_R2 analysis_DoseResponseRawDataGrouped.xlsx]

## Sheet: RawData
NanoTemper Technologies	NanoTemper Technologies
MO.Affinity Analysis v3.0.5	MO.Affinity Analysis v3.0.5
Origin of exported data	Origin of exported data
Project Title:	20230407_BSA+PTX
Comment:
Project File Path:	C:\Users\nanotemper\Desktop\Aurora_MST\20230407_BSA\BSA+PTX analysis.nta3
Analysis-Set Name:	Analysis-Set #1
Exported from:	Dose-Response (Grouped)
Exported on:	2023-04-07 09:23:55
Analysis Settings	Analysis Settings
Type of Analysis:	MST
Evaluation strategy:	On Time
Cold Region Start:	-1
Cold Region End:	0
Hot Region Start:	4
Hot Region End:	5
Sample Information	Sample Information
Merge-Set Name:	BSA+PTX_R2 (#17)
Date of Measurement:	2023-04-07 08:52:31.777 → 2023-04-07 08:59:11.577
Capillary Type:	Monolith Premium Capillary
Target:	BSA
TargetConcentration:	5e-09
Ligand:	PTX
Measurement Settings	Measurement Settings
MST-Power:	Medium
Excitation-Power:	30
Excitation type:	Pico - RED
Thermostat Setpoint:	25
Fit Results (Kd)	Fit Results (Kd)
Fit Model:	Kd
Bound	825.886
Unbound	895.722
Kd	0.0145136
TargetConc	5e-09
Standard Deviation:	0.574324
Lower Kd Confidence:	0.00602271
Upper Kd Confidence:	0.0349751
Dose Response Curve	Dose Response Curve	Dose Response Curve
Ligand Concentration [M]	Fnorm [‰]	Error Value
0.005	877.559	0
0.0025	886.578	0
0.00125	889.245	0
0.000625	892.687	0
0.0003125	893.631	0
0.00015625	895.129	0
7.8125e-05	895.008	0
3.90625e-05	895.009	0
1.95313e-05	895.871	0
9.76563e-06	895.344	0
4.88281e-06	896.223	0
2.44141e-06	895.989	0
1.2207e-06	895.609	0
6.10352e-07	896.053	0
3.05176e-07	895.584	0
1.52588e-07	896.496	0

## Sheet: Fit-Values
Dose	FNorm
0.00466516
0.00435275
0.00406126
0.00378929
0.00353553
0.00329877
0.00307786
0.00287175
0.00267943
0.0025
0.00233258
0.00217638
0.00203063
0.00189465
0.00176777
0.00164938
0.00153893
0.00143587
0.00133972
0.00125
0.00116629
0.00108819
0.00101532
0.000947323
0.000883883
0.000824692
0.000769465
0.000717936
0.000669858
0.000625
0.000583146
0.000544094
0.000507658
0.000473661
0.000441942
0.000412346
0.000384733
0.000358968
0.000334929
0.0003125
0.000291573
0.000272047
0.000253829
0.000236831
0.000220971
0.000206173
0.000192366
0.000179484
0.000167465
0.00015625
0.000145786
0.000136024
0.000126914
0.000118415
0.000110485
0.000103087
9.61832e-05
8.97421e-05
8.37323e-05
7.8125e-05
7.28932e-05
6.80118e-05
6.34572e-05
5.92077e-05
5.52427e-05
5.15433e-05
4.80916e-05
4.4871e-05
4.18662e-05
3.90625e-05
3.64466e-05
3.40059e-05
3.17286e-05
2.96038e-05
2.76214e-05
2.57716e-05
2.40458e-05
2.24355e-05
2.09331e-05
1.95313e-05
1.82233e-05
1.70029e-05
1.58643e-05
1.48019e-05
1.38107e-05
1.28858e-05
1.20229e-05
1.12178e-05
1.04665e-05
9.76563e-06
9.11165e-06
8.50147e-06
7.93215e-06
7.40096e-06
6.90534e-06
6.44291e-06
6.01145e-06
5.60888e-06
5.23327e-06
4.88281e-06
4.55583e-06
4.25074e-06
3.96608e-06
3.70048e-06
3.45267e-06
3.22145e-06
3.00572e-06
2.80444e-06
2.61663e-06
2.44141e-06
2.27791e-06
2.12537e-06
1.98304e-06
1.85024e-06
1.72633e-06
1.61073e-06
1.50286e-06
1.40222e-06
1.30832e-06
1.2207e-06
1.13896e-06
1.06268e-06
9.91519e-07
9.2512e-07
8.63167e-07
8.05364e-07
7.51431e-07
7.0111e-07
6.54159e-07
6.10352e-07
5.69478e-07
5.31342e-07
4.9576e-07
4.6256e-07
4.31584e-07
4.02682e-07
3.75715e-07
3.50555e-07
3.27079e-07
3.05176e-07
2.84739e-07
2.65671e-07
2.4788e-07
2.3128e-07
2.15792e-07
2.01341e-07
1.87858e-07
1.75277e-07
1.6354e-07
1.52588e-07
