# Supplementary material for: Binding and sequestration of poison frog alkaloids by a plasma globulin
Source: eLife journal article supplement (doi:10.7554/elife.85096), 2023-12-14
Supplement: fig5-data1 [file BSA+PTX_R2 analysis_MSTTraceRawData.xlsx]

## Sheet: RawData
NanoTemper Technologies	NanoTemper Technologies
MO.Affinity Analysis v3.0.5	MO.Affinity Analysis v3.0.5
Origin of exported data	Origin of exported data
Project Title:	20230407_BSA+PTX
Comment:
Project File Path:	C:\Users\nanotemper\Desktop\Aurora_MST\20230407_BSA\BSA+PTX analysis.nta3
Analysis-Set Name:	Analysis-Set #1
Exported from:	MST Traces
Exported on:	2023-04-07 09:23:42
Analysis Settings	Analysis Settings
Type of Analysis:	MST
Evaluation strategy:	On Time
Cold Region Start:	-1
Cold Region End:	0
Hot Region Start:	4
Hot Region End:	5
Sample Information	Sample Information		Sample Information	Sample Information		Sample Information	Sample Information		Sample Information	Sample Information		Sample Information	Sample Information		Sample Information	Sample Information		Sample Information	Sample Information		Sample Information	Sample Information		Sample Information	Sample Information		Sample Information	Sample Information		Sample Information	Sample Information		Sample Information	Sample Information		Sample Information	Sample Information		Sample Information	Sample Information		Sample Information	Sample Information		Sample Information	Sample Information
Merge-Set Name:	BSA+PTX_R2 (#17)		Merge-Set Name:	BSA+PTX_R2 (#17)		Merge-Set Name:	BSA+PTX_R2 (#17)		Merge-Set Name:	BSA+PTX_R2 (#17)		Merge-Set Name:	BSA+PTX_R2 (#17)		Merge-Set Name:	BSA+PTX_R2 (#17)		Merge-Set Name:	BSA+PTX_R2 (#17)		Merge-Set Name:	BSA+PTX_R2 (#17)		Merge-Set Name:	BSA+PTX_R2 (#17)		Merge-Set Name:	BSA+PTX_R2 (#17)		Merge-Set Name:	BSA+PTX_R2 (#17)		Merge-Set Name:	BSA+PTX_R2 (#17)		Merge-Set Name:	BSA+PTX_R2 (#17)		Merge-Set Name:	BSA+PTX_R2 (#17)		Merge-Set Name:	BSA+PTX_R2 (#17)		Merge-Set Name:	BSA+PTX_R2 (#17)
Run Name:	BSA+PTX_R2 (#17)		Run Name:	BSA+PTX_R2 (#17)		Run Name:	BSA+PTX_R2 (#17)		Run Name:	BSA+PTX_R2 (#17)		Run Name:	BSA+PTX_R2 (#17)		Run Name:	BSA+PTX_R2 (#17)		Run Name:	BSA+PTX_R2 (#17)		Run Name:	BSA+PTX_R2 (#17)		Run Name:	BSA+PTX_R2 (#17)		Run Name:	BSA+PTX_R2 (#17)		Run Name:	BSA+PTX_R2 (#17)		Run Name:	BSA+PTX_R2 (#17)		Run Name:	BSA+PTX_R2 (#17)		Run Name:	BSA+PTX_R2 (#17)		Run Name:	BSA+PTX_R2 (#17)		Run Name:	BSA+PTX_R2 (#17)
Date of Measurement:	2023-04-07 08:52:31		Date of Measurement:	2023-04-07 08:52:58		Date of Measurement:	2023-04-07 08:53:25		Date of Measurement:	2023-04-07 08:53:51		Date of Measurement:	2023-04-07 08:54:18		Date of Measurement:	2023-04-07 08:54:44		Date of Measurement:	2023-04-07 08:55:11		Date of Measurement:	2023-04-07 08:55:38		Date of Measurement:	2023-04-07 08:56:05		Date of Measurement:	2023-04-07 08:56:31		Date of Measurement:	2023-04-07 08:56:58		Date of Measurement:	2023-04-07 08:57:24		Date of Measurement:	2023-04-07 08:57:51		Date of Measurement:	2023-04-07 08:58:18		Date of Measurement:	2023-04-07 08:58:45		Date of Measurement:	2023-04-07 08:59:11
Capillary Type:	Monolith Premium Capillary		Capillary Type:	Monolith Premium Capillary		Capillary Type:	Monolith Premium Capillary		Capillary Type:	Monolith Premium Capillary		Capillary Type:	Monolith Premium Capillary		Capillary Type:	Monolith Premium Capillary		Capillary Type:	Monolith Premium Capillary		Capillary Type:	Monolith Premium Capillary		Capillary Type:	Monolith Premium Capillary		Capillary Type:	Monolith Premium Capillary		Capillary Type:	Monolith Premium Capillary		Capillary Type:	Monolith Premium Capillary		Capillary Type:	Monolith Premium Capillary		Capillary Type:	Monolith Premium Capillary		Capillary Type:	Monolith Premium Capillary		Capillary Type:	Monolith Premium Capillary
Capillary Position:	1		Capillary Position:	9		Capillary Position:	2		Capillary Position:	10		Capillary Position:	3		Capillary Position:	11		Capillary Position:	4		Capillary Position:	12		Capillary Position:	5		Capillary Position:	13		Capillary Position:	6		Capillary Position:	14		Capillary Position:	7		Capillary Position:	15		Capillary Position:	8		Capillary Position:	16
Ligand:	PTX		Ligand:	PTX		Ligand:	PTX		Ligand:	PTX		Ligand:	PTX		Ligand:	PTX		Ligand:	PTX		Ligand:	PTX		Ligand:	PTX		Ligand:	PTX		Ligand:	PTX		Ligand:	PTX		Ligand:	PTX		Ligand:	PTX		Ligand:	PTX		Ligand:	PTX
Ligand Concentration:	0.005		Ligand Concentration:	1.95313e-05		Ligand Concentration:	0.0025		Ligand Concentration:	9.76563e-06		Ligand Concentration:	0.00125		Ligand Concentration:	4.88281e-06		Ligand Concentration:	0.000625		Ligand Concentration:	2.44141e-06		Ligand Concentration:	0.0003125		Ligand Concentration:	1.2207e-06		Ligand Concentration:	0.00015625		Ligand Concentration:	6.10352e-07		Ligand Concentration:	7.8125e-05		Ligand Concentration:	3.05176e-07		Ligand Concentration:	3.90625e-05		Ligand Concentration:	1.52588e-07
Target:	BSA		Target:	BSA		Target:	BSA		Target:	BSA		Target:	BSA		Target:	BSA		Target:	BSA		Target:	BSA		Target:	BSA		Target:	BSA		Target:	BSA		Target:	BSA		Target:	BSA		Target:	BSA		Target:	BSA		Target:	BSA
TargetConcentration:	5e-09		TargetConcentration:	5e-09		TargetConcentration:	5e-09		TargetConcentration:	5e-09		TargetConcentration:	5e-09		TargetConcentration:	5e-09		TargetConcentration:	5e-09		TargetConcentration:	5e-09		TargetConcentration:	5e-09		TargetConcentration:	5e-09		TargetConcentration:	5e-09		TargetConcentration:	5e-09		TargetConcentration:	5e-09		TargetConcentration:	5e-09		TargetConcentration:	5e-09		TargetConcentration:	5e-09
Measurement Settings	Measurement Settings		Measurement Settings	Measurement Settings		Measurement Settings	Measurement Settings		Measurement Settings	Measurement Settings		Measurement Settings	Measurement Settings		Measurement Settings	Measurement Settings		Measurement Settings	Measurement Settings		Measurement Settings	Measurement Settings		Measurement Settings	Measurement Settings		Measurement Settings	Measurement Settings		Measurement Settings	Measurement Settings		Measurement Settings	Measurement Settings		Measurement Settings	Measurement Settings		Measurement Settings	Measurement Settings		Measurement Settings	Measurement Settings		Measurement Settings	Measurement Settings
MST-Power:	Medium		MST-Power:	Medium		MST-Power:	Medium		MST-Power:	Medium		MST-Power:	Medium		MST-Power:	Medium		MST-Power:	Medium		MST-Power:	Medium		MST-Power:	Medium		MST-Power:	Medium		MST-Power:	Medium		MST-Power:	Medium		MST-Power:	Medium		MST-Power:	Medium		MST-Power:	Medium		MST-Power:	Medium
Excitation-Power:	30		Excitation-Power:	30		Excitation-Power:	30		Excitation-Power:	30		Excitation-Power:	30		Excitation-Power:	30		Excitation-Power:	30		Excitation-Power:	30		Excitation-Power:	30		Excitation-Power:	30		Excitation-Power:	30		Excitation-Power:	30		Excitation-Power:	30		Excitation-Power:	30		Excitation-Power:	30		Excitation-Power:	30
Excitation type:	Pico - RED		Excitation type:	Pico - RED		Excitation type:	Pico - RED		Excitation type:	Pico - RED		Excitation type:	Pico - RED		Excitation type:	Pico - RED		Excitation type:	Pico - RED		Excitation type:	Pico - RED		Excitation type:	Pico - RED		Excitation type:	Pico - RED		Excitation type:	Pico - RED		Excitation type:	Pico - RED		Excitation type:	Pico - RED		Excitation type:	Pico - RED		Excitation type:	Pico - RED		Excitation type:	Pico - RED
Thermostat Setpoint:	25		Thermostat Setpoint:	25		Thermostat Setpoint:	25		Thermostat Setpoint:	25		Thermostat Setpoint:	25		Thermostat Setpoint:	25		Thermostat Setpoint:	25		Thermostat Setpoint:	25		Thermostat Setpoint:	25		Thermostat Setpoint:	25		Thermostat Setpoint:	25		Thermostat Setpoint:	25		Thermostat Setpoint:	25		Thermostat Setpoint:	25		Thermostat Setpoint:	25		Thermostat Setpoint:	25
Included	Included		Included	Included		Included	Included		Included	Included		Included	Included		Included	Included		Included	Included		Included	Included		Included	Included		Included	Included		Included	Included		Included	Included		Included	Included		Included	Included		Included	Included		Included	Included
Time [s]	Normalized Fluorescence [-]		Time [s]	Normalized Fluorescence [-]		Time [s]	Normalized Fluorescence [-]		Time [s]	Normalized Fluorescence [-]		Time [s]	Normalized Fluorescence [-]		Time [s]	Normalized Fluorescence [-]		Time [s]	Normalized Fluorescence [-]		Time [s]	Normalized Fluorescence [-]		Time [s]	Normalized Fluorescence [-]		Time [s]	Normalized Fluorescence [-]		Time [s]	Normalized Fluorescence [-]		Time [s]	Normalized Fluorescence [-]		Time [s]	Normalized Fluorescence [-]		Time [s]	Normalized Fluorescence [-]		Time [s]	Normalized Fluorescence [-]		Time [s]	Normalized Fluorescence [-]
-2.9501	0.999778		-2.9502	1.0008		-2.9502	1.00274		-2.9502	0.999348		-2.9502	1.00048		-2.9501	1.00086		-2.9501	0.998893		-2.9502	1.00188		-2.9502	0.997304		-2.9502	1.00103		-2.9501	1.00101		-2.9502	1.00077		-2.9502	0.998341		-2.9502	1.00235		-2.9502	0.998793		-2.9501	1.00035
-2.9001	1.00056		-2.9002	0.999094		-2.9001	1.00072		-2.9002	1.00049		-2.9002	1.0019		-2.9001	0.99861		-2.9001	0.999275		-2.9002	0.99856		-2.9002	0.99975		-2.9002	1.00148		-2.9001	0.999626		-2.9002	1.00034		-2.9002	0.999033		-2.9002	1.00076		-2.9002	0.998559		-2.9001	0.999839
-2.8501	0.998633		-2.8502	0.999393		-2.8501	1.00239		-2.8502	1.00068		-2.8502	0.996365		-2.8501	1.00013		-2.8501	1.00198		-2.8502	1.00088		-2.8502	0.997934		-2.8502	0.997959		-2.8501	0.998989		-2.8502	1.00081		-2.8502	0.998992		-2.8502	0.999857		-2.8502	0.999485		-2.8501	1.00082
-2.8001	1.00054		-2.8002	0.99947		-2.8001	1.00159		-2.8002	1.00021		-2.8002	0.999923		-2.8001	0.999268		-2.8001	0.999276		-2.8002	0.999083		-2.8002	0.999899		-2.8002	0.996719		-2.8001	0.999847		-2.8002	1.00103		-2.8001	0.998884		-2.8002	0.996482		-2.8002	0.996826		-2.8001	1.00056
-2.7501	0.999834		-2.7502	1.00065		-2.7501	0.999167		-2.7502	0.999434		-2.7502	1.00054		-2.7501	0.999594		-2.7501	0.999548		-2.7502	1.00091		-2.7502	1.00026		-2.7502	1.00064		-2.7501	1.00059		-2.7501	0.999222		-2.7501	0.999472		-2.7502	1.00264		-2.7502	1.00153		-2.7501	1.00118
-2.7001	0.998291		-2.7002	0.997166		-2.7001	1.00038		-2.7002	0.999136		-2.7002	1.00128		-2.7001	0.998986		-2.7001	0.999902		-2.7002	1.00069		-2.7002	0.999629		-2.7002	1.00168		-2.7001	0.998889		-2.7001	1.0002		-2.7001	1.00165		-2.7002	0.999669		-2.7002	1.00011		-2.7001	1.00124
-2.6501	1.00141		-2.6502	1.00053		-2.6501	1.00047		-2.6502	0.998745		-2.6502	0.999627		-2.6501	1.00091		-2.6501	0.999548		-2.6502	1.00091		-2.6502	1.00074		-2.6502	0.997494		-2.6501	0.998422		-2.6501	0.999338		-2.6501	1.00219		-2.6502	0.9983		-2.6502	0.999104		-2.6501	0.999659
-2.6001	0.998049		-2.6002	0.998418		-2.6001	0.997446		-2.6002	1.00246		-2.6002	0.997787		-2.6001	1.00061		-2.6001	1.00034		-2.6002	0.997807		-2.6002	0.998817		-2.6002	0.999197		-2.6001	0.999361		-2.6001	0.997318		-2.6001	0.996335		-2.6002	0.996451		-2.6002	0.998022		-2.6001	1.00008
-2.5501	0.998205		-2.5501	0.999453		-2.5501	0.999602		-2.5502	0.997434		-2.5502	0.998686		-2.5501	0.997691		-2.5501	1.00003		-2.5502	0.999739		-2.5502	1.00203		-2.5502	0.999178		-2.5501	0.99863		-2.5501	0.999309		-2.5501	1.00008		-2.5502	0.998242		-2.5502	0.999937		-2.5501	0.998084
-2.5001	0.998731		-2.5001	0.998868		-2.5001	0.999393		-2.5002	0.999039		-2.5002	0.99866		-2.5001	0.994664		-2.5001	0.998973		-2.5001	0.999471		-2.5002	1.00082		-2.5002	1.00008		-2.5001	0.996502		-2.5001	0.997625		-2.5001	0.997173		-2.5002	1.00088		-2.5002	1.00211		-2.5001	1.00047
-2.4501	0.999007		-2.4501	0.99993		-2.4501	0.997643		-2.4502	1.00164		-2.4502	0.998665		-2.4501	1.00039		-2.4501	0.999759		-2.4501	1.0008		-2.4502	1.00097		-2.4502	0.999352		-2.4501	1.00034		-2.4501	0.998565		-2.4501	1.00322		-2.4502	1.001		-2.4502	0.999726		-2.4501	0.998432
-2.4001	1.00012		-2.4001	1.00091		-2.4001	0.998136		-2.4002	0.998584		-2.4002	0.998077		-2.4001	0.998059		-2.4001	1.00123		-2.4001	0.998495		-2.4001	0.998195		-2.4002	1.00175		-2.4001	0.999541		-2.4001	0.998348		-2.4001	0.99844		-2.4002	0.99685		-2.4002	1.00227		-2.4001	1.00041
-2.3501	0.999565		-2.3501	0.99979		-2.3501	0.99566		-2.3502	1.00126		-2.3502	0.996565		-2.3501	0.997642		-2.3501	1.00022		-2.3501	0.998835		-2.3501	0.998703		-2.3502	1.00042		-2.3501	1.00308		-2.3501	0.999746		-2.3501	0.999062		-2.3502	0.999065		-2.3502	0.997611		-2.3501	0.997774
-2.3001	0.997759		-2.3001	0.999925		-2.3001	0.998196		-2.3002	0.998885		-2.3002	0.999542		-2.3001	1.00143		-2.3001	1.00175		-2.3001	1.00075		-2.3001	0.998816		-2.3002	1.0011		-2.3001	0.998656		-2.3001	0.998446		-2.3001	1.00126		-2.3002	0.998935		-2.3002	0.998344		-2.3001	0.996169
-2.2501	0.999643		-2.2501	0.999122		-2.2501	0.997004		-2.2502	0.998642		-2.2502	0.999495		-2.2501	0.999747		-2.2501	0.996644		-2.2501	0.997491		-2.2501	0.998532		-2.2502	0.998268		-2.2501	0.997437		-2.2501	0.998092		-2.2501	1.00165		-2.2502	0.999111		-2.2502	1.00025		-2.2501	1.00089
-2.2001	0.997998		-2.2001	1.00038		-2.2001	0.996146		-2.2001	0.99826		-2.2002	0.999535		-2.2001	0.994799		-2.2001	1.00043		-2.2001	1.00205		-2.2001	1.00051		-2.2002	1.00106		-2.2001	1.00001		-2.2001	0.997439		-2.2001	1.00018		-2.2002	0.998619		-2.2002	0.999859		-2.2001	0.999194
-2.1501	0.999288		-2.1501	1.00039		-2.1501	0.998141		-2.1501	0.998325		-2.1501	0.997592		-2.1501	1.00088		-2.1501	0.998635		-2.1501	1.00053		-2.1501	0.99532		-2.1502	0.995837		-2.1501	0.998844		-2.1501	0.995534		-2.1501	1.00074		-2.1502	1.00043		-2.1502	0.997616		-2.1501	0.999321
-2.1001	0.997951		-2.1001	1.00019		-2.1001	0.999276		-2.1001	0.99831		-2.1001	0.997555		-2.1001	0.996589		-2.1001	0.998911		-2.1001	1.00049		-2.1001	0.996343		-2.1002	0.997781		-2.1001	0.99856		-2.1001	0.998327		-2.1001	0.997661		-2.1001	1.00022		-2.1002	1.00057		-2.1001	0.999295
-2.0501	0.997345		-2.0501	0.999946		-2.0501	0.998436		-2.0501	0.998804		-2.0501	0.997476		-2.0501	0.998537		-2.0501	0.995205		-2.0501	0.99668		-2.0501	1.00156		-2.0502	0.998536		-2.0501	0.997404		-2.0501	1.00048		-2.0501	1.00004		-2.0501	0.998627		-2.0502	1.00048		-2.0501	1.0005
-2.0001	1.00023		-2.0001	1.00011		-2.0001	0.999307		-2.0001	0.997747		-2.0001	1.00055		-2.0001	0.998627		-2.0001	0.999381		-2.0001	1.00008		-2.0001	1.0004		-2.0002	0.996476		-2.0001	1.00049		-2.0001	0.99778		-2.0001	0.998183		-2.0001	0.999448		-2.0001	0.998599		-2.0001	0.998663
-1.9501	1.00023		-1.9501	0.997821		-1.9501	0.999877		-1.9501	0.997413		-1.9501	0.997882		-1.9501	0.998519		-1.9501	0.99835		-1.9501	0.998103		-1.9501	1.00005		-1.9502	1.00005		-1.9501	0.997541		-1.9501	0.996601		-1.9501	1.00034		-1.9501	0.9985		-1.9501	0.999714		-1.9501	0.996403
-1.9001	0.996051		-1.9001	1.00095		-1.9001	0.997711		-1.9001	0.998266		-1.9001	1.00063		-1.9001	0.998072		-1.9001	1.00114		-1.9001	0.995827		-1.9001	0.997987		-1.9002	0.995024		-1.9001	0.999712		-1.9001	0.998236		-1.9001	0.997779		-1.9001	0.997836		-1.9001	1.00174		-1.9001	0.999528
-1.8501	0.999227		-1.8501	0.998203		-1.8501	0.996458		-1.8501	0.995165		-1.8501	1.00212		-1.8501	0.998533		-1.8501	0.998862		-1.8501	0.999616		-1.8501	0.999411		-1.8502	1.00059		-1.8501	1.00132		-1.8501	1.00066		-1.8501	1.00005		-1.8501	1.00209		-1.8501	1.00191		-1.8501	0.998872
-1.8001	0.998321		-1.8001	0.999844		-1.8001	0.996392		-1.8001	0.998315		-1.8001	0.997936		-1.8001	0.999059		-1.8001	0.997337		-1.8001	1.00004		-1.8001	0.998313		-1.8002	1.00044		-1.8001	0.997354		-1.8001	0.998016		-1.8001	1.00294		-1.8001	0.998805		-1.8001	0.998499		-1.8001	0.997106
-1.7501	0.995666		-1.7501	1.00103		-1.7501	0.997498		-1.7501	1.00049		-1.7501	0.998524		-1.7501	0.998293		-1.7501	0.996039		-1.7501	1.00009		-1.7501	0.99966		-1.7502	0.999284		-1.7501	0.997563		-1.7501	0.99848		-1.7501	0.995822		-1.7501	0.997412		-1.7501	1.001		-1.7501	1.00013
-1.7001	0.999383		-1.7001	0.997392		-1.7001	0.998263		-1.7001	1.00137		-1.7001	1.00171		-1.7001	0.99749		-1.7001	0.996391		-1.7001	0.998865		-1.7001	0.997879		-1.7001	1.00168		-1.7001	1.00155		-1.7001	0.998916		-1.7001	0.997211		-1.7001	0.999705		-1.7001	1.00009		-1.7001	0.996788
-1.6501	0.997857		-1.6501	0.998362		-1.6501	0.996266		-1.6501	1.00092		-1.6501	0.998654		-1.6501	1.00133		-1.6501	0.997863		-1.6501	0.996128		-1.6501	0.996883		-1.6501	1.00047		-1.65	1.00088		-1.6501	1.00133		-1.6501	0.996587		-1.6501	1.00059		-1.6501	0.99901		-1.6501	0.998246
-1.6001	0.997391		-1.6001	1.00087		-1.6001	0.998827		-1.6001	1.00004		-1.6001	0.9991		-1.6001	0.998495		-1.6001	0.999104		-1.6001	0.996493		-1.6001	0.997297		-1.6001	0.997383		-1.6	0.997451		-1.6001	0.996869		-1.6001	0.999323		-1.6001	0.999518		-1.6001	0.999718		-1.6001	0.999972
-1.5501	0.9989		-1.5501	0.999363		-1.5501	0.997704		-1.5501	0.996285		-1.5501	1.00011		-1.5501	0.997252		-1.5501	0.996925		-1.5501	0.998039		-1.5501	1.00069		-1.5501	0.998994		-1.55	0.998911		-1.5501	0.998832		-1.5501	0.999831		-1.5501	0.998617		-1.5501	0.99716		-1.5501	0.998262
-1.5001	0.996793		-1.5001	0.999967		-1.5001	0.994957		-1.5001	0.996562		-1.5001	0.998813		-1.5001	0.999216		-1.5001	0.998012		-1.5001	0.995969		-1.5001	0.996958		-1.5001	0.99849		-1.5	0.998014		-1.5001	0.999137		-1.5001	1.00094		-1.5001	1.0005		-1.5001	0.998824		-1.5001	0.999568
-1.45	0.994751		-1.4501	0.998875		-1.4501	0.995732		-1.4501	0.997065		-1.4501	0.996943		-1.45	0.998026		-1.4501	0.997257		-1.4501	1.00119		-1.4501	0.996229		-1.4501	0.999546		-1.45	0.999417		-1.4501	0.997656		-1.4501	0.998326		-1.4501	1.00028		-1.4501	1.00031		-1.4501	0.995905
-1.4	0.995982		-1.4001	0.995683		-1.4001	0.996944		-1.4001	0.997206		-1.4001	1.00084		-1.4	0.99543		-1.4001	1.00179		-1.4001	0.997179		-1.4001	0.995545		-1.4001	1.00087		-1.4	0.996697		-1.4001	0.999445		-1.4001	1.00282		-1.4001	0.999642		-1.4001	0.996364		-1.4001	0.999173
-1.35	0.994992		-1.3501	0.999224		-1.3501	0.996826		-1.3501	0.998282		-1.3501	0.99635		-1.35	0.99726		-1.35	0.996937		-1.3501	0.99707		-1.3501	0.999305		-1.3501	1.00004		-1.35	0.996145		-1.3501	0.99692		-1.3501	1.00041		-1.3501	0.996596		-1.3501	0.999678		-1.3501	1.00018
-1.3	0.99622		-1.3001	1.00203		-1.3001	0.997854		-1.3001	0.997196		-1.3001	0.996102		-1.3	1.00002		-1.3	0.996053		-1.3001	0.998152		-1.3001	0.997943		-1.3001	1.00135		-1.3	0.997205		-1.3001	0.998533		-1.3001	0.99708		-1.3001	0.998247		-1.3001	0.995618		-1.3	0.998805
-1.25	0.995631		-1.2501	0.999385		-1.2501	0.994867		-1.2501	0.997405		-1.2501	0.996599		-1.25	0.994916		-1.25	0.997806		-1.2501	0.998011		-1.2501	1.00042		-1.2501	0.999428		-1.25	0.994311		-1.2501	0.99922		-1.2501	0.997264		-1.2501	0.997623		-1.2501	0.995879		-1.25	0.99856
-1.2	0.994334		-1.2001	0.997982		-1.2001	0.998175		-1.2001	0.998613		-1.2001	0.998926		-1.2	0.997288		-1.2	0.997542		-1.2001	0.996559		-1.2001	0.998062		-1.2001	0.999529		-1.2	0.998249		-1.2001	0.998051		-1.2001	0.998384		-1.2001	0.998233		-1.2001	0.997055		-1.2	0.999899
-1.15	0.99585		-1.1501	0.997577		-1.1501	0.996314		-1.1501	0.998475		-1.1501	0.994596		-1.15	0.998951		-1.15	0.996882		-1.1501	1.00082		-1.1501	0.998739		-1.1501	0.996665		-1.15	0.99927		-1.1501	0.997108		-1.1501	0.996414		-1.1501	0.996349		-1.1501	0.998764		-1.15	0.998604
-1.1	0.99566		-1.1001	0.997875		-1.1	0.997229		-1.1001	0.997783		-1.1001	0.997586		-1.1	0.996132		-1.1	0.995524		-1.1001	0.99982		-1.1001	0.998079		-1.1001	0.996207		-1.1	0.995449		-1.1001	0.999629		-1.1001	0.997362		-1.1001	0.996865		-1.1001	0.997476		-1.1	0.996757
-1.05	0.996793		-1.0501	0.998149		-1.05	0.998555		-1.0501	0.998085		-1.0501	0.993755		-1.05	0.996143		-1.05	0.997821		-1.0501	0.996526		-1.0501	0.998065		-1.0501	1.00036		-1.05	0.997549		-1.0501	0.998409		-1.0501	1.00324		-1.0501	0.997525		-1.0501	0.995427		-1.05	1.00057
-1	0.993319		-1.0001	1.00085		-1	0.996701		-1.0001	0.997527		-1.0001	0.996462		-1	0.999102		-1	0.99467		-1.0001	1.00036		-1.0001	0.996384		-1.0001	0.998655		-1	0.997708		-1.0001	1.0002		-1	0.99808		-1.0001	0.998016		-1.0001	0.997962		-1	0.997072
-0.95	0.994715		-0.9501	0.99689		-0.95	0.998494		-0.9501	0.998078		-0.9501	0.996298		-0.95	0.993937		-0.95	0.998124		-0.9501	0.999655		-0.9501	0.998227		-0.9501	1.00075		-0.95	0.995768		-0.9501	0.999523		-0.95	0.999335		-0.9501	0.996126		-0.9501	0.99793		-0.95	0.997744
-0.9	0.997694		-0.9001	0.996419		-0.9	0.99693		-0.9001	0.999768		-0.9001	0.996197		-0.9	0.998062		-0.9	0.996531		-0.9001	0.999083		-0.9001	1.0028		-0.9001	0.998946		-0.9	0.99407		-0.9	0.999381		-0.9	0.997394		-0.9001	0.996184		-0.9001	0.996625		-0.9	0.996081
-0.85	0.994439		-0.8501	0.997413		-0.85	0.996547		-0.8501	0.995711		-0.8501	0.998415		-0.85	0.998426		-0.85	0.995966		-0.8501	0.997103		-0.8501	0.996142		-0.8501	0.998678		-0.85	1.00246		-0.85	0.997289		-0.85	0.995067		-0.8501	0.99664		-0.8501	0.998283		-0.85	0.998487
-0.8	0.995208		-0.8001	0.997755		-0.8	0.996218		-0.8001	0.996332		-0.8001	0.995572		-0.8	0.997402		-0.8	1.00048		-0.8001	0.996341		-0.8001	0.997328		-0.8001	0.997662		-0.8	0.997332		-0.8	0.996033		-0.8	0.997033		-0.8001	0.999341		-0.8001	0.997195		-0.8	0.995892
-0.75	0.995835		-0.75	0.998457		-0.75	0.99654		-0.7501	0.996928		-0.7501	0.99787		-0.75	0.995779		-0.75	0.997812		-0.7501	0.997521		-0.7501	0.996877		-0.7501	1.00034		-0.75	0.996263		-0.75	0.99818		-0.75	0.999785		-0.7501	0.998849		-0.7501	0.996484		-0.75	0.99832
-0.7	0.996114		-0.7	0.999472		-0.7	0.996602		-0.7001	0.998339		-0.7001	0.991632		-0.7	0.998999		-0.7	0.996057		-0.7	0.99592		-0.7001	0.99767		-0.7001	1.00193		-0.7	0.996041		-0.7	0.995952		-0.7	0.993768		-0.7001	0.996346		-0.7001	0.997393		-0.7	0.999701
-0.65	0.994859		-0.65	0.997716		-0.65	0.996972		-0.6501	0.998429		-0.6501	0.996454		-0.65	0.996276		-0.65	0.995115		-0.65	0.998399		-0.6501	0.996562		-0.6501	1.00013		-0.65	0.997415		-0.65	0.998126		-0.65	0.999935		-0.6501	0.99753		-0.6501	0.999095		-0.65	0.998209
-0.6	0.995546		-0.6	0.99916		-0.6	0.996064		-0.6001	0.997264		-0.6001	0.997048		-0.6	0.995395		-0.6	0.995387		-0.6	0.998192		-0.6	0.997844		-0.6001	0.996843		-0.6	0.995346		-0.6	0.997138		-0.6	0.996697		-0.6001	0.997617		-0.6001	0.996882		-0.6	0.996376
-0.55	0.994721		-0.55	1.00092		-0.55	0.992162		-0.5501	0.996917		-0.5501	0.995588		-0.55	0.994689		-0.55	0.99436		-0.55	0.997292		-0.55	0.994618		-0.5501	0.99474		-0.55	0.998979		-0.55	0.995878		-0.55	0.998866		-0.5501	1.00069		-0.5501	0.998878		-0.55	0.998217
-0.5	0.995926		-0.5	0.996758		-0.5	0.996192		-0.5001	0.994002		-0.5001	0.996334		-0.5	0.997133		-0.5	0.995156		-0.5	0.996144		-0.5	0.997526		-0.5001	0.999242		-0.5	0.998019		-0.5	0.996449		-0.5	0.995391		-0.5001	0.997664		-0.5001	0.997319		-0.5	0.997729
-0.45	0.994546		-0.45	0.996193		-0.45	0.996103		-0.4501	0.99661		-0.4501	0.995174		-0.45	0.996011		-0.45	0.997978		-0.45	0.998278		-0.45	0.996408		-0.4501	0.998835		-0.45	0.995979		-0.45	0.997432		-0.45	0.996344		-0.4501	0.999495		-0.4501	0.999771		-0.45	0.99782
-0.4	0.994636		-0.4	0.996377		-0.4	0.997266		-0.4	0.998344		-0.4001	0.997315		-0.4	0.995601		-0.4	0.999658		-0.4	0.995853		-0.4	0.996147		-0.4001	0.997265		-0.4	1.00068		-0.4	0.99675		-0.4	0.998808		-0.4001	0.996954		-0.4001	0.999248		-0.4	0.998591
-0.35	0.996583		-0.35	0.998698		-0.35	0.997854		-0.35	0.996797		-0.3501	0.996041		-0.35	0.997439		-0.35	0.995066		-0.35	0.998124		-0.35	0.996517		-0.3501	0.998513		-0.35	0.993021		-0.35	0.996564		-0.35	0.99877		-0.3501	0.996408		-0.3501	0.996956		-0.35	0.997358
-0.3	0.994988		-0.3	0.998359		-0.3	0.994015		-0.3	0.996148		-0.3	0.997755		-0.3	0.9936		-0.3	0.9986		-0.3	0.999903		-0.3	0.999083		-0.3001	0.99747		-0.3	0.996283		-0.3	0.994443		-0.3	0.996406		-0.3	0.996747		-0.3001	0.999081		-0.3	0.997726
-0.25	0.995453		-0.25	1.00024		-0.25	0.995663		-0.25	0.995642		-0.25	0.994341		-0.25	0.993292		-0.25	0.998431		-0.25	0.998408		-0.25	0.995434		-0.2501	0.997307		-0.25	0.998209		-0.25	0.997511		-0.25	0.999609		-0.25	0.998333		-0.2501	0.99649		-0.25	0.996111
-0.2	0.995935		-0.2	0.99646		-0.2	0.9967		-0.2	0.996907		-0.2	0.995441		-0.2	0.998397		-0.2	0.995462		-0.2	0.994387		-0.2	0.996298		-0.2001	0.995409		-0.2	0.996006		-0.2	0.994458		-0.2	0.99656		-0.2	0.99572		-0.2	0.998566		-0.2	0.997947
-0.15	0.994578		-0.15	0.999155		-0.15	0.99321		-0.15	0.998538		-0.15	0.997185		-0.15	0.993562		-0.15	0.996129		-0.15	0.99791		-0.15	0.994263		-0.1501	0.993071		-0.15	0.994102		-0.15	0.993951		-0.15	0.996847		-0.15	0.997427		-0.15	0.996934		-0.15	1.00013
-0.0999999	0.992943		-0.0999999	0.998887		-0.0999999	0.99318		-0.0999999	0.996365		-0.0999999	0.995584		-0.0999999	0.994926		-0.0999999	0.995173		-0.0999999	0.998342		-0.0999999	0.99532		-0.1001	0.997351		-0.0999999	0.994652		-0.0999999	0.994137		-0.0999999	1.00032		-0.0999999	0.995763		-0.0999999	0.996986		-0.0999999	0.994126
-0.05	0.992664		-0.05	0.996515		-0.05	0.993333		-0.05	0.994423		-0.05	0.99639		-0.05	0.991806		-0.05	0.994105		-0.05	0.998941		-0.05	0.995785		-0.0501001	0.999739		-0.05	0.997886		-0.05	0.995623		-0.05	0.995988		-0.05	0.998559		-0.05	0.996727		-0.05	0.998704
0	0.995658		0	0.998877		0	0.994689		0	0.99645		0	0.997592		0	0.994153		0	1.00009		0	0.997645		0	0.996604		0	0.997853		0	0.996802		0	0.994556		0	1.00012		0	0.996211		0	0.997549		0	0.997078
0.05	0.982824		0.05	0.990554		0.05	0.990084		0.05	0.987807		0.05	0.989227		0.05	0.988672		0.05	0.986615		0.05	0.989473		0.05	0.988551		0.0499001	0.989344		0.0500002	0.989182		0.05	0.992152		0.05	0.989903		0.05	0.99045		0.05	0.989565		0.05	0.987971
0.0999999	0.971648		0.0999999	0.981631		0.0999999	0.977002		0.0999999	0.979227		0.0999999	0.976631		0.0999999	0.978392		0.0999999	0.977047		0.0999999	0.979769		0.0999999	0.977553		0.0999999	0.981494		0.1	0.979523		0.0999999	0.97939		0.0999999	0.979112		0.0999999	0.979579		0.0999999	0.975711		0.0999999	0.979775
0.15	0.967539		0.15	0.972363		0.15	0.969111		0.15	0.97323		0.15	0.971649		0.15	0.96821		0.15	0.969926		0.15	0.973828		0.15	0.973706		0.15	0.97363		0.15	0.972855		0.15	0.970032		0.15	0.971756		0.15	0.973867		0.15	0.970039		0.15	0.97373
0.2	0.95981		0.2	0.968996		0.2	0.963778		0.2	0.968546		0.2	0.962734		0.2	0.966592		0.2	0.968295		0.2	0.969477		0.2	0.966138		0.2	0.970049		0.2001	0.966253		0.2	0.966625		0.2	0.968899		0.2	0.966232		0.2	0.967249		0.2	0.965357
0.25	0.955361		0.25	0.964638		0.25	0.960393		0.25	0.966316		0.25	0.961626		0.25	0.965903		0.25	0.961934		0.25	0.962974		0.25	0.962569		0.25	0.963221		0.2501	0.964073		0.25	0.968353		0.25	0.966274		0.25	0.965463		0.25	0.966982		0.25	0.964376
0.3	0.952824		0.3	0.963502		0.3	0.956975		0.3	0.963149		0.3	0.958233		0.3	0.95963		0.3	0.960081		0.3	0.961676		0.3	0.963959		0.3	0.963623		0.3001	0.957891		0.3	0.961586		0.3	0.960708		0.3	0.959639		0.3	0.960379		0.3	0.962029
0.35	0.951101		0.35	0.962328		0.35	0.954903		0.35	0.95788		0.35	0.957473		0.35	0.961607		0.35	0.958063		0.35	0.961384		0.35	0.95901		0.35	0.959249		0.3501	0.960945		0.35	0.960177		0.35	0.962137		0.35	0.962696		0.35	0.958732		0.35	0.959383
0.4001	0.948098		0.4	0.956933		0.4	0.952647		0.4	0.957754		0.4	0.954043		0.4001	0.954968		0.4	0.953676		0.4	0.956585		0.4	0.958022		0.4	0.95584		0.4001	0.956039		0.4	0.956793		0.4	0.957001		0.4	0.95576		0.4	0.95822		0.4	0.958781
0.4501	0.94376		0.45	0.95764		0.45	0.950292		0.45	0.954897		0.45	0.951323		0.4501	0.95441		0.4501	0.955782		0.45	0.955212		0.45	0.953245		0.45	0.956572		0.4501	0.956956		0.45	0.955157		0.45	0.951052		0.45	0.956535		0.45	0.95685		0.45	0.957197
0.5001	0.945181		0.5	0.952837		0.5	0.946362		0.5	0.951855		0.5	0.950843		0.5001	0.950818		0.5001	0.953701		0.5	0.952635		0.5	0.952805		0.5	0.954743		0.5001	0.951564		0.5	0.953029		0.5	0.952194		0.5	0.952153		0.5	0.955418		0.5001	0.954695
0.5501	0.941509		0.55	0.951412		0.55	0.948459		0.55	0.951773		0.55	0.949494		0.5501	0.949304		0.5501	0.949411		0.55	0.950053		0.55	0.951035		0.55	0.955817		0.5501	0.951398		0.55	0.951213		0.55	0.950246		0.55	0.954547		0.55	0.951322		0.5501	0.949812
0.6001	0.936948		0.6	0.949986		0.6	0.941961		0.6	0.952777		0.6	0.946075		0.6001	0.950853		0.6001	0.945533		0.6	0.947157		0.6	0.947915		0.6	0.949882		0.6001	0.946572		0.6	0.951363		0.6	0.951245		0.6	0.949155		0.6	0.9515		0.6001	0.951682
0.6501	0.938053		0.65	0.94757		0.65	0.941819		0.65	0.948796		0.65	0.943321		0.6501	0.94517		0.6501	0.943826		0.65	0.948845		0.65	0.943443		0.65	0.950228		0.6501	0.947644		0.65	0.946792		0.65	0.949555		0.65	0.950324		0.65	0.946658		0.6501	0.9497
0.7001	0.933445		0.7	0.947261		0.7	0.941402		0.7	0.946682		0.7	0.942636		0.7001	0.946725		0.7001	0.944489		0.7	0.945883		0.7	0.947333		0.7	0.949387		0.7001	0.948789		0.7	0.948093		0.7	0.949241		0.7	0.949222		0.7	0.947003		0.7001	0.949215
0.7501	0.933867		0.75	0.946113		0.7501	0.938922		0.75	0.944423		0.75	0.940685		0.7501	0.944965		0.7501	0.943479		0.75	0.94375		0.75	0.944051		0.75	0.94485		0.7501	0.947243		0.75	0.946129		0.75	0.946536		0.75	0.946639		0.75	0.94491		0.7501	0.947936
0.8001	0.933996		0.8	0.94658		0.8001	0.939168		0.8	0.944152		0.8	0.941018		0.8001	0.942607		0.8001	0.939599		0.8	0.949484		0.8	0.946097		0.8	0.947096		0.8001	0.945823		0.8	0.945045		0.8	0.9442		0.8	0.945727		0.8	0.945019		0.8001	0.945722
0.8501	0.931403		0.85	0.945675		0.8501	0.93981		0.85	0.944706		0.85	0.939981		0.8501	0.943713		0.8501	0.943678		0.85	0.941191		0.85	0.943608		0.85	0.944948		0.8501	0.939991		0.85	0.943789		0.8501	0.941864		0.85	0.94006		0.85	0.944068		0.8501	0.945204
0.9001	0.927133		0.9	0.941934		0.9001	0.933923		0.9	0.941923		0.9	0.937104		0.9001	0.939513		0.9001	0.936735		0.9	0.941269		0.9	0.940261		0.9	0.942061		0.9001	0.940495		0.9001	0.941226		0.9001	0.941543		0.9	0.941937		0.9	0.940708		0.9001	0.940927
0.9501	0.926942		0.95	0.940762		0.9501	0.933776		0.95	0.940102		0.95	0.933606		0.9501	0.940653		0.9501	0.936929		0.95	0.940095		0.95	0.938826		0.95	0.942849		0.9501	0.94086		0.9501	0.942828		0.9501	0.940541		0.95	0.938859		0.95	0.940007		0.9501	0.939493
1.0001	0.924502		1	0.939972		1.0001	0.932816		1	0.939299		1	0.9357		1.0001	0.938954		1.0001	0.937261		1	0.941294		1	0.935443		1	0.940089		1.0001	0.934734		1.0001	0.940928		1.0001	0.9373		1	0.938297		1	0.936864		1.0001	0.940007
1.0501	0.924059		1.05	0.937897		1.0501	0.932295		1.05	0.939299		1.05	0.933111		1.0501	0.937324		1.0501	0.938458		1.05	0.940817		1.05	0.938159		1.05	0.939012		1.0501	0.935398		1.0501	0.93655		1.0501	0.939292		1.05	0.939454		1.05	0.937195		1.0501	0.939656
1.1001	0.923431		1.1001	0.936764		1.1001	0.930313		1.1	0.937242		1.1	0.932954		1.1001	0.936257		1.1001	0.934994		1.1	0.937137		1.1	0.937754		1.1	0.938465		1.1001	0.937907		1.1001	0.937709		1.1001	0.936477		1.1	0.934064		1.1	0.939884		1.1001	0.938446
1.1501	0.923129		1.1501	0.938525		1.1501	0.931042		1.15	0.934915		1.15	0.932303		1.1501	0.932659		1.1501	0.931589		1.1501	0.9361		1.15	0.934639		1.15	0.936069		1.1501	0.935731		1.1501	0.93237		1.1501	0.93616		1.15	0.938883		1.15	0.936478		1.1501	0.934515
1.2001	0.92267		1.2001	0.93608		1.2001	0.929007		1.2	0.934113		1.2	0.927857		1.2001	0.935421		1.2001	0.933408		1.2001	0.936584		1.2	0.934354		1.2	0.935151		1.2001	0.934421		1.2001	0.936468		1.2001	0.935371		1.2	0.934364		1.2	0.933387		1.2001	0.934309
1.2501	0.919284		1.2501	0.930432		1.2501	0.924838		1.25	0.933493		1.25	0.929279		1.2501	0.932177		1.2501	0.931123		1.2501	0.933788		1.2501	0.932763		1.25	0.935416		1.2501	0.930636		1.2501	0.936384		1.2501	0.934921		1.25	0.931766		1.25	0.93394		1.2501	0.934887
1.3001	0.918554		1.3001	0.932151		1.3001	0.924578		1.3	0.933467		1.3	0.928167		1.3001	0.931121		1.3001	0.928849		1.3001	0.932559		1.3001	0.931741		1.3	0.937707		1.3001	0.931573		1.3001	0.930863		1.3001	0.933171		1.3	0.934145		1.3	0.93422		1.3001	0.931993
1.3501	0.918594		1.3501	0.933599		1.3501	0.925727		1.35	0.931969		1.35	0.924216		1.3501	0.933176		1.3501	0.932553		1.3501	0.93186		1.3501	0.93091		1.35	0.933973		1.3501	0.930907		1.3501	0.929681		1.3501	0.933033		1.35	0.930775		1.35	0.932338		1.3501	0.930743
1.4001	0.917131		1.4001	0.930259		1.4001	0.920156		1.4	0.931415		1.4	0.926593		1.4001	0.928699		1.4001	0.928811		1.4001	0.928928		1.4001	0.930983		1.4	0.931892		1.4001	0.928448		1.4001	0.930693		1.4001	0.930823		1.4	0.930938		1.4	0.928621		1.4001	0.930462
1.4501	0.914401		1.4501	0.930053		1.4501	0.922893		1.4501	0.929595		1.45	0.926011		1.4501	0.928839		1.4501	0.92638		1.4501	0.929801		1.4501	0.929466		1.45	0.929544		1.4501	0.931418		1.4501	0.930005		1.4501	0.925192		1.45	0.93105		1.45	0.92968		1.4501	0.929813
1.5001	0.910826		1.5001	0.927877		1.5001	0.91983		1.5001	0.930815		1.5001	0.924902		1.5001	0.928482		1.5001	0.926183		1.5001	0.930231		1.5001	0.926464		1.5	0.931291		1.5001	0.923511		1.5001	0.928136		1.5001	0.928952		1.5	0.928254		1.5	0.927992		1.5001	0.930565
1.5501	0.912922		1.5501	0.929635		1.5501	0.923183		1.5501	0.92768		1.5501	0.922413		1.5501	0.926735		1.5501	0.926911		1.5501	0.927901		1.5501	0.925938		1.55	0.929745		1.5501	0.927276		1.5501	0.927917		1.5501	0.927384		1.5501	0.92789		1.55	0.926874		1.5501	0.929642
1.6001	0.912959		1.6001	0.92992		1.6001	0.919138		1.6001	0.926795		1.6001	0.923857		1.6001	0.923987		1.6001	0.923492		1.6001	0.928642		1.6001	0.927884		1.6	0.927315		1.6001	0.926928		1.6001	0.925788		1.6001	0.927092		1.6001	0.926876		1.6	0.924813		1.6001	0.928407
1.6501	0.910571		1.6501	0.925911		1.6501	0.917797		1.6501	0.924555		1.6501	0.921163		1.6501	0.92527		1.6501	0.925618		1.6501	0.927059		1.6501	0.921224		1.65	0.927604		1.6501	0.92241		1.6501	0.926619		1.6501	0.926607		1.6501	0.926972		1.6501	0.924324		1.6501	0.925308
1.7001	0.910352		1.7001	0.926258		1.7001	0.916702		1.7001	0.924959		1.7001	0.921718		1.7001	0.925402		1.7001	0.924541		1.7001	0.924159		1.7001	0.923292		1.7	0.926475		1.7001	0.926794		1.7001	0.920587		1.7001	0.928132		1.7001	0.927573		1.7001	0.924311		1.7001	0.925257
1.7501	0.909603		1.7501	0.92647		1.7501	0.915452		1.7501	0.925879		1.7501	0.9208		1.7501	0.923434		1.7501	0.922259		1.7501	0.924618		1.7501	0.923392		1.75	0.926023		1.7501	0.92283		1.7501	0.924522		1.7501	0.924188		1.7501	0.925808		1.7501	0.923845		1.7501	0.926427
1.8001	0.910696		1.8001	0.923843		1.8001	0.91492		1.8001	0.92504		1.8001	0.919532		1.8001	0.923587		1.8001	0.919612		1.8001	0.923645		1.8001	0.922364		1.8	0.924099		1.8001	0.924121		1.8001	0.92566		1.8001	0.923898		1.8001	0.925054		1.8001	0.923674		1.8001	0.923889
1.8501	0.906357		1.8501	0.921576		1.8501	0.917479		1.8501	0.924042		1.8501	0.91869		1.8501	0.923898		1.8501	0.9208		1.8501	0.921096		1.8501	0.921104		1.85	0.925132		1.8501	0.92021		1.8501	0.922948		1.8501	0.923571		1.8501	0.92304		1.8501	0.924408		1.8501	0.924398
1.9001	0.904942		1.9001	0.922737		1.9001	0.914124		1.9001	0.919636		1.9001	0.917849		1.9001	0.923484		1.9001	0.917716		1.9001	0.921469		1.9001	0.91918		1.9	0.923127		1.9001	0.920876		1.9001	0.920935		1.9001	0.922437		1.9001	0.922172		1.9001	0.922493		1.9001	0.922527
1.9501	0.9059		1.9501	0.921771		1.9501	0.913632		1.9501	0.918175		1.9501	0.917458		1.9501	0.920072		1.9501	0.920629		1.9501	0.919642		1.9501	0.920768		1.9501	0.920085		1.9501	0.919698		1.9501	0.92106		1.9501	0.919702		1.9501	0.921788		1.9501	0.92193		1.9501	0.920088
2.0001	0.905775		2.0001	0.921983		2.0001	0.912679		2.0001	0.91734		2.0001	0.915272		2.0001	0.919832		2.0001	0.917476		2.0001	0.92233		2.0001	0.915004		2.0001	0.920643		2.0002	0.92229		2.0001	0.921961		2.0001	0.919265		2.0001	0.919509		2.0001	0.921517		2.0001	0.92319
2.0501	0.90498		2.0501	0.92133		2.0501	0.910839		2.0501	0.916418		2.0501	0.914792		2.0501	0.918375		2.0501	0.91659		2.0501	0.920607		2.0501	0.917335		2.0501	0.920092		2.0502	0.91818		2.0501	0.91878		2.0501	0.920058		2.0501	0.921867		2.0501	0.919501		2.0501	0.920899
2.1001	0.903104		2.1001	0.919881		2.1001	0.908401		2.1001	0.91731		2.1001	0.913718		2.1001	0.920552		2.1001	0.916706		2.1001	0.921428		2.1001	0.916701		2.1001	0.919236		2.1002	0.919456		2.1001	0.919193		2.1001	0.918031		2.1001	0.918167		2.1001	0.917603		2.1001	0.922193
2.1501	0.901087		2.1501	0.91844		2.1501	0.911618		2.1501	0.920449		2.1501	0.914389		2.1501	0.918411		2.1501	0.912765		2.1501	0.917507		2.1501	0.915771		2.1501	0.918616		2.1502	0.916847		2.1501	0.919696		2.1501	0.918266		2.1501	0.919377		2.1501	0.923174		2.1501	0.921431
2.2002	0.903751		2.2001	0.920057		2.2001	0.909441		2.2001	0.918325		2.2001	0.909592		2.2002	0.917153		2.2001	0.915222		2.2001	0.917731		2.2001	0.91591		2.2001	0.91932		2.2002	0.915951		2.2001	0.91617		2.2001	0.916365		2.2001	0.917841		2.2001	0.918559		2.2001	0.917217
2.2502	0.901452		2.2501	0.916988		2.2501	0.90665		2.2501	0.917211		2.2501	0.909952		2.2502	0.915268		2.2501	0.913769		2.2501	0.918587		2.2501	0.915037		2.2501	0.917877		2.2502	0.915464		2.2501	0.916313		2.2501	0.917607		2.2501	0.915436		2.2501	0.914883		2.2501	0.917821
2.3002	0.898735		2.3001	0.918338		2.3001	0.910103		2.3001	0.915022		2.3001	0.911906		2.3002	0.916952		2.3002	0.914284		2.3001	0.914564		2.3001	0.914412		2.3001	0.917912		2.3002	0.916139		2.3001	0.914414		2.3001	0.916729		2.3001	0.915507		2.3001	0.917372		2.3001	0.916067
2.3502	0.89677		2.3501	0.917977		2.3501	0.90567		2.3501	0.914163		2.3501	0.911069		2.3502	0.916691		2.3502	0.912716		2.3501	0.914128		2.3501	0.913698		2.3501	0.916507		2.3502	0.914232		2.3501	0.914377		2.3501	0.915611		2.3501	0.915431		2.3501	0.915736		2.3502	0.917743
2.4002	0.898057		2.4001	0.917899		2.4001	0.906542		2.4001	0.913987		2.4001	0.908408		2.4002	0.913487		2.4002	0.914915		2.4001	0.915968		2.4001	0.913172		2.4001	0.915217		2.4002	0.914628		2.4001	0.915113		2.4001	0.91491		2.4001	0.916112		2.4001	0.912716		2.4002	0.917147
2.4502	0.897614		2.4501	0.914227		2.4501	0.906891		2.4501	0.915035		2.4501	0.90774		2.4502	0.915478		2.4502	0.910201		2.4501	0.914665		2.4501	0.913503		2.4501	0.914454		2.4502	0.91352		2.4501	0.916292		2.4501	0.914709		2.4501	0.913845		2.4501	0.915098		2.4502	0.913556
2.5002	0.897473		2.5001	0.914912		2.5001	0.902953		2.5001	0.915939		2.5001	0.910852		2.5002	0.909814		2.5002	0.910281		2.5001	0.915154		2.5001	0.91326		2.5001	0.915179		2.5002	0.915258		2.5001	0.915014		2.5001	0.911329		2.5001	0.913531		2.5001	0.915434		2.5002	0.912719
2.5502	0.896422		2.5501	0.913222		2.5502	0.903771		2.5501	0.909776		2.5501	0.907052		2.5502	0.913939		2.5502	0.909028		2.5501	0.912386		2.5501	0.909997		2.5501	0.911822		2.5502	0.910727		2.5501	0.914373		2.5501	0.913279		2.5501	0.912089		2.5501	0.913394		2.5502	0.912235
2.6002	0.89475		2.6001	0.910448		2.6002	0.904737		2.6001	0.910184		2.6001	0.907573		2.6002	0.911267		2.6002	0.907821		2.6001	0.910978		2.6001	0.910902		2.6001	0.912584		2.6002	0.910395		2.6001	0.913079		2.6001	0.913491		2.6001	0.911123		2.6001	0.913083		2.6002	0.913557
2.6502	0.89623		2.6501	0.913923		2.6502	0.905344		2.6501	0.911191		2.6501	0.906249		2.6502	0.910935		2.6502	0.907613		2.6501	0.912539		2.6501	0.909838		2.6501	0.913786		2.6502	0.913973		2.6501	0.913634		2.6502	0.911247		2.6501	0.909135		2.6501	0.911533		2.6502	0.910477
2.7002	0.892496		2.7001	0.912858		2.7002	0.903332		2.7001	0.910054		2.7001	0.904641		2.7002	0.910977		2.7002	0.908436		2.7001	0.911045		2.7001	0.909225		2.7001	0.912423		2.7002	0.910178		2.7001	0.910859		2.7002	0.91104		2.7001	0.911358		2.7001	0.910307		2.7002	0.91227
2.7502	0.891932		2.7501	0.91163		2.7502	0.901503		2.7501	0.912215		2.7501	0.906227		2.7502	0.909191		2.7502	0.907285		2.7501	0.909951		2.7501	0.909814		2.7501	0.911953		2.7502	0.911581		2.7502	0.910295		2.7502	0.910122		2.7501	0.912259		2.7501	0.910116		2.7502	0.91303
2.8002	0.891929		2.8001	0.909399		2.8002	0.899283		2.8001	0.91015		2.8001	0.903525		2.8002	0.909014		2.8002	0.907152		2.8001	0.910999		2.8001	0.907168		2.8001	0.909886		2.8002	0.907242		2.8002	0.909548		2.8002	0.908091		2.8001	0.912282		2.8001	0.90943		2.8002	0.912679
2.8502	0.891703		2.8501	0.913243		2.8502	0.900108		2.8501	0.905868		2.8501	0.904507		2.8502	0.9085		2.8502	0.904976		2.8501	0.908446		2.8501	0.905674		2.8501	0.911015		2.8502	0.910526		2.8502	0.912255		2.8502	0.913045		2.8501	0.911458		2.8501	0.910756		2.8502	0.910225
2.9002	0.891511		2.9002	0.912296		2.9002	0.899948		2.9001	0.908658		2.9001	0.904353		2.9002	0.910124		2.9002	0.908058		2.9001	0.908707		2.9001	0.905745		2.9001	0.910842		2.9002	0.911354		2.9002	0.907369		2.9002	0.90936		2.9001	0.910454		2.9001	0.907313		2.9002	0.912242
2.9502	0.890988		2.9502	0.911592		2.9502	0.900138		2.9501	0.908525		2.9501	0.900689		2.9502	0.909294		2.9502	0.90258		2.9502	0.908166		2.9501	0.907508		2.9501	0.907238		2.9502	0.905789		2.9502	0.909744		2.9502	0.907125		2.9501	0.906787		2.9501	0.906922		2.9502	0.909288
3.0002	0.888648		3.0002	0.908669		3.0002	0.899537		3.0001	0.909378		3.0001	0.902825		3.0002	0.907954		3.0002	0.904799		3.0002	0.908681		3.0001	0.904998		3.0001	0.909391		3.0002	0.905155		3.0002	0.906381		3.0002	0.90838		3.0001	0.909988		3.0001	0.907131		3.0002	0.908187
3.0502	0.8891		3.0502	0.906903		3.0502	0.897129		3.0501	0.906258		3.0501	0.901605		3.0502	0.904094		3.0502	0.905666		3.0502	0.908629		3.0502	0.904651		3.0501	0.906552		3.0502	0.904249		3.0502	0.906095		3.0502	0.907937		3.0501	0.905838		3.0501	0.905351		3.0502	0.908235
3.1002	0.889379		3.1002	0.908352		3.1002	0.898252		3.1001	0.905992		3.1001	0.901176		3.1002	0.907511		3.1002	0.906267		3.1002	0.906419		3.1002	0.903703		3.1001	0.907317		3.1002	0.906092		3.1002	0.905038		3.1002	0.905484		3.1001	0.904612		3.1001	0.905326		3.1002	0.906833
3.1502	0.886289		3.1502	0.907098		3.1502	0.894569		3.1501	0.901296		3.1501	0.897139		3.1502	0.904895		3.1502	0.902155		3.1502	0.907109		3.1502	0.908436		3.1501	0.909544		3.1502	0.904365		3.1502	0.905404		3.1502	0.905126		3.1501	0.908403		3.1501	0.907087		3.1502	0.906169
3.2002	0.887785		3.2002	0.904831		3.2002	0.894507		3.2001	0.904669		3.2001	0.899409		3.2002	0.90225		3.2002	0.904066		3.2002	0.903702		3.2002	0.905238		3.2001	0.906903		3.2002	0.903245		3.2002	0.904178		3.2002	0.905985		3.2001	0.904024		3.2001	0.907517		3.2002	0.90624
3.2502	0.886502		3.2502	0.905236		3.2502	0.891957		3.2502	0.904399		3.2501	0.900269		3.2502	0.905804		3.2502	0.900294		3.2502	0.904381		3.2502	0.905254		3.2501	0.905812		3.2502	0.905243		3.2502	0.904097		3.2502	0.905053		3.2501	0.905541		3.2501	0.903607		3.2502	0.903116
3.3002	0.885324		3.3002	0.903855		3.3002	0.894313		3.3002	0.900432		3.3001	0.897157		3.3002	0.90382		3.3002	0.900537		3.3002	0.904201		3.3002	0.904318		3.3001	0.901888		3.3002	0.904476		3.3002	0.903112		3.3002	0.902248		3.3001	0.90643		3.3001	0.904347		3.3002	0.905504
3.3502	0.883747		3.3502	0.904902		3.3502	0.893552		3.3502	0.903927		3.3502	0.897264		3.3502	0.901075		3.3502	0.900828		3.3502	0.904443		3.3502	0.904159		3.3501	0.903912		3.3502	0.90186		3.3502	0.902955		3.3502	0.904128		3.3502	0.904594		3.3501	0.904805		3.3502	0.90558
3.4002	0.884967		3.4002	0.904023		3.4002	0.89328		3.4002	0.905314		3.4002	0.896769		3.4002	0.903511		3.4002	0.899405		3.4002	0.901673		3.4002	0.905109		3.4001	0.905487		3.4002	0.901355		3.4002	0.903699		3.4002	0.90245		3.4002	0.901845		3.4001	0.904465		3.4002	0.905251
3.4502	0.884468		3.4502	0.904273		3.4502	0.894043		3.4502	0.902731		3.4502	0.894937		3.4502	0.904334		3.4502	0.900028		3.4502	0.903048		3.4502	0.898103		3.4501	0.905156		3.4502	0.899537		3.4502	0.901085		3.4502	0.902011		3.4502	0.903071		3.4502	0.903658		3.4502	0.902006
3.5002	0.885903		3.5002	0.906784		3.5002	0.89399		3.5002	0.899469		3.5002	0.896809		3.5002	0.90197		3.5002	0.898824		3.5002	0.903835		3.5002	0.900853		3.5001	0.900419		3.5002	0.900525		3.5002	0.903342		3.5002	0.904154		3.5002	0.902992		3.5002	0.903953		3.5002	0.904617
3.5502	0.881436		3.5502	0.902837		3.5502	0.890984		3.5502	0.901524		3.5502	0.897077		3.5502	0.901025		3.5502	0.898582		3.5502	0.900151		3.5502	0.897535		3.5501	0.903771		3.5502	0.898307		3.5502	0.902737		3.5502	0.90094		3.5502	0.901057		3.5502	0.900657		3.5502	0.901017
3.6002	0.88115		3.6002	0.903932		3.6002	0.892214		3.6002	0.902582		3.6002	0.893245		3.6002	0.899659		3.6002	0.898548		3.6002	0.901363		3.6002	0.898214		3.6001	0.902814		3.6002	0.901317		3.6002	0.90161		3.6002	0.900157		3.6002	0.906862		3.6002	0.898862		3.6002	0.900183
3.6502	0.880105		3.6502	0.902061		3.6502	0.891084		3.6502	0.90099		3.6502	0.892078		3.6502	0.900495		3.6502	0.898991		3.6502	0.897965		3.6502	0.899125		3.6501	0.903183		3.6502	0.900488		3.6502	0.898949		3.6502	0.902654		3.6502	0.901784		3.6502	0.901274		3.6502	0.902425
3.7002	0.882136		3.7002	0.903092		3.7002	0.887624		3.7002	0.898748		3.7002	0.892427		3.7002	0.900755		3.7002	0.895557		3.7002	0.901171		3.7002	0.896501		3.7001	0.89774		3.7002	0.89824		3.7002	0.900138		3.7002	0.899614		3.7002	0.899462		3.7002	0.901855		3.7002	0.902103
3.7502	0.884248		3.7502	0.901661		3.7502	0.888018		3.7502	0.899621		3.7502	0.8918		3.7502	0.901312		3.7502	0.895403		3.7502	0.898998		3.7502	0.897658		3.7502	0.899137		3.7502	0.899796		3.7502	0.898181		3.7502	0.900374		3.7502	0.900558		3.7502	0.898308		3.7502	0.899635
3.8002	0.879052		3.8002	0.900719		3.8002	0.88885		3.8002	0.901861		3.8002	0.892877		3.8002	0.897465		3.8002	0.894554		3.8002	0.902245		3.8002	0.896254		3.8002	0.899291		3.8002	0.900436		3.8002	0.900006		3.8002	0.898604		3.8002	0.899226		3.8002	0.898121		3.8002	0.904709
3.8502	0.879668		3.8502	0.902771		3.8502	0.890393		3.8502	0.899045		3.8502	0.891512		3.8502	0.900307		3.8502	0.89506		3.8502	0.897027		3.8502	0.899499		3.8502	0.896996		3.8503	0.899007		3.8502	0.901417		3.8502	0.897042		3.8502	0.898275		3.8502	0.898677		3.8502	0.901428
3.9002	0.879731		3.9002	0.900066		3.9002	0.889272		3.9002	0.898083		3.9002	0.889934		3.9002	0.898381		3.9002	0.895304		3.9002	0.89911		3.9002	0.895411		3.9002	0.898821		3.9003	0.897199		3.9002	0.898435		3.9002	0.899968		3.9002	0.89779		3.9002	0.900684		3.9002	0.898365
3.9502	0.878965		3.9502	0.897547		3.9502	0.888625		3.9502	0.896585		3.9502	0.892772		3.9502	0.897825		3.9502	0.899008		3.9502	0.897743		3.9502	0.896529		3.9502	0.901995		3.9503	0.897187		3.9502	0.89859		3.9502	0.900102		3.9502	0.900653		3.9502	0.899026		3.9502	0.897764
4.0002	0.877621		4.0002	0.899304		4.0002	0.889548		4.0002	0.897652		4.0002	0.887767		4.0002	0.89825		4.0002	0.893592		4.0002	0.897798		4.0002	0.897506		4.0002	0.898238		4.0003	0.893935		4.0002	0.900181		4.0002	0.896621		4.0002	0.897205		4.0002	0.897749		4.0002	0.901117
4.0503	0.876629		4.0502	0.900724		4.0502	0.885141		4.0502	0.895619		4.0502	0.890638		4.0503	0.893851		4.0502	0.891705		4.0502	0.897687		4.0502	0.894813		4.0502	0.897134		4.0503	0.894826		4.0502	0.895134		4.0502	0.896024		4.0502	0.897852		4.0502	0.899639		4.0502	0.894152
4.1003	0.878676		4.1002	0.897717		4.1002	0.885115		4.1002	0.894349		4.1002	0.887726		4.1003	0.895542		4.1003	0.892276		4.1002	0.898028		4.1002	0.890901		4.1002	0.897135		4.1003	0.894851		4.1002	0.895096		4.1002	0.895166		4.1002	0.898584		4.1002	0.895681		4.1002	0.897361
4.1503	0.876909		4.1502	0.896322		4.1502	0.88546		4.1502	0.896568		4.1502	0.890268		4.1503	0.894673		4.1503	0.895304		4.1502	0.895936		4.1502	0.892069		4.1502	0.897399		4.1503	0.896526		4.1502	0.895175		4.1502	0.89482		4.1502	0.896097		4.1502	0.894912		4.1503	0.898029
4.2003	0.87894		4.2002	0.895374		4.2002	0.88565		4.2002	0.89619		4.2002	0.887652		4.2003	0.895054		4.2003	0.892217		4.2002	0.894731		4.2002	0.893835		4.2002	0.894086		4.2003	0.891955		4.2002	0.89411		4.2002	0.894746		4.2002	0.8959		4.2002	0.8943		4.2003	0.894713
4.2503	0.877533		4.2502	0.895193		4.2502	0.884662		4.2502	0.897091		4.2502	0.886857		4.2503	0.896227		4.2503	0.89354		4.2502	0.896904		4.2502	0.89185		4.2502	0.895495		4.2503	0.896737		4.2502	0.894072		4.2502	0.897263		4.2502	0.893687		4.2502	0.895068		4.2503	0.89422
4.3003	0.875243		4.3002	0.895097		4.3002	0.883388		4.3002	0.893711		4.3002	0.885356		4.3003	0.894676		4.3003	0.891275		4.3002	0.894596		4.3002	0.891031		4.3002	0.899011		4.3003	0.894304		4.3002	0.89355		4.3002	0.894439		4.3002	0.895603		4.3002	0.891429		4.3003	0.896802
4.3503	0.871951		4.3502	0.894551		4.3502	0.885796		4.3502	0.893393		4.3502	0.88708		4.3503	0.892848		4.3503	0.889353		4.3502	0.894492		4.3502	0.892124		4.3502	0.893444		4.3503	0.893462		4.3502	0.894168		4.3502	0.893304		4.3502	0.892182		4.3502	0.893241		4.3503	0.896203
4.4003	0.874149		4.4002	0.89468		4.4003	0.886106		4.4002	0.894904		4.4002	0.883374		4.4003	0.895504		4.4003	0.888376		4.4002	0.895494		4.4002	0.894273		4.4002	0.894258		4.4003	0.892625		4.4002	0.893893		4.4002	0.891101		4.4002	0.893865		4.4002	0.894641		4.4003	0.894417
4.4503	0.871479		4.4502	0.894863		4.4503	0.882653		4.4502	0.893329		4.4502	0.885582		4.4503	0.893256		4.4503	0.891835		4.4502	0.893884		4.4502	0.894504		4.4502	0.892802		4.4503	0.893181		4.4502	0.892369		4.4502	0.891415		4.4502	0.893563		4.4502	0.892938		4.4503	0.896257
4.5003	0.870874		4.5002	0.89231		4.5003	0.881264		4.5002	0.890156		4.5002	0.886545		4.5003	0.89062		4.5003	0.889882		4.5002	0.892561		4.5002	0.889846		4.5002	0.89314		4.5003	0.891551		4.5002	0.895549		4.5003	0.893085		4.5002	0.89504		4.5002	0.893371		4.5003	0.893275
4.5503	0.873123		4.5502	0.896526		4.5503	0.881959		4.5502	0.891166		4.5502	0.885799		4.5503	0.893568		4.5503	0.888136		4.5502	0.891916		4.5502	0.89184		4.5502	0.891479		4.5503	0.89478		4.5503	0.891583		4.5503	0.893551		4.5502	0.891331		4.5502	0.892538		4.5503	0.89553
4.6003	0.873865		4.6002	0.893455		4.6003	0.882732		4.6002	0.891409		4.6002	0.885244		4.6003	0.892666		4.6003	0.885501		4.6002	0.893288		4.6002	0.892046		4.6002	0.893213		4.6003	0.890128		4.6003	0.894694		4.6003	0.891541		4.6002	0.889535		4.6002	0.892572		4.6003	0.893046
4.6503	0.873224		4.6502	0.890561		4.6503	0.880323		4.6502	0.892086		4.6502	0.885665		4.6503	0.889065		4.6503	0.888437		4.6502	0.895075		4.6502	0.886138		4.6502	0.890367		4.6503	0.886436		4.6503	0.892029		4.6503	0.893227		4.6502	0.889724		4.6502	0.88977		4.6503	0.895507
4.7003	0.871913		4.7002	0.891455		4.7003	0.880439		4.7002	0.891989		4.7002	0.884034		4.7003	0.890671		4.7003	0.888744		4.7002	0.893807		4.7002	0.889382		4.7002	0.893018		4.7003	0.891697		4.7003	0.890105		4.7003	0.892186		4.7002	0.892979		4.7002	0.892009		4.7003	0.89389
4.7503	0.872165		4.7503	0.890383		4.7503	0.882906		4.7502	0.889993		4.7502	0.88429		4.7503	0.890889		4.7503	0.888206		4.7502	0.889529		4.7502	0.88722		4.7502	0.892478		4.7503	0.889315		4.7503	0.889748		4.7503	0.889166		4.7502	0.889497		4.7502	0.889631		4.7503	0.89073
4.8003	0.868906		4.8003	0.891365		4.8003	0.877611		4.8002	0.888201		4.8002	0.884891		4.8003	0.888556		4.8003	0.886505		4.8003	0.890665		4.8002	0.887823		4.8002	0.890592		4.8003	0.890096		4.8003	0.889623		4.8003	0.890647		4.8002	0.891476		4.8002	0.890998		4.8003	0.890205
4.8503	0.868424		4.8503	0.890671		4.8503	0.877391		4.8502	0.890878		4.8502	0.883963		4.8503	0.888554		4.8503	0.886943		4.8503	0.893413		4.8502	0.885151		4.8502	0.892403		4.8503	0.88801		4.8503	0.888729		4.8503	0.889259		4.8502	0.890149		4.8502	0.888272		4.8503	0.892741
4.9003	0.867691		4.9003	0.889534		4.9003	0.878962		4.9002	0.886262		4.9002	0.88303		4.9003	0.887758		4.9003	0.886424		4.9003	0.891139		4.9003	0.8884		4.9002	0.891006		4.9003	0.889064		4.9003	0.889459		4.9003	0.888649		4.9002	0.892825		4.9002	0.892802		4.9003	0.889413
4.9503	0.866302		4.9503	0.891349		4.9503	0.879831		4.9502	0.886845		4.9502	0.880458		4.9503	0.887459		4.9503	0.884963		4.9503	0.887154		4.9503	0.886219		4.9502	0.891754		4.9503	0.891171		4.9503	0.890302		4.9503	0.889608		4.9502	0.889713		4.9502	0.887968		4.9503	0.890105
5.0003	0.868871		5.0003	0.890829		5.0003	0.879493		5.0002	0.889195		5.0002	0.879934		5.0003	0.887919		5.0003	0.88421		5.0003	0.887822		5.0003	0.888708		5.0002	0.889938		5.0003	0.888437		5.0003	0.890396		5.0003	0.886469		5.0002	0.89019		5.0002	0.887527		5.0003	0.888089
5.0503	0.866507		5.0503	0.891664		5.0503	0.877697		5.0502	0.887349		5.0502	0.883095		5.0503	0.88703		5.0503	0.884355		5.0503	0.89099		5.0503	0.889816		5.0502	0.88996		5.0503	0.886582		5.0503	0.888314		5.0503	0.887203		5.0502	0.888909		5.0502	0.887436		5.0503	0.887203
5.1003	0.866259		5.1003	0.887561		5.1003	0.877828		5.1003	0.887988		5.1002	0.880207		5.1003	0.888833		5.1003	0.88319		5.1003	0.88824		5.1003	0.885562		5.1002	0.888572		5.1003	0.88557		5.1003	0.889413		5.1003	0.88906		5.1002	0.891114		5.1002	0.890766		5.1003	0.88791
5.1503	0.865614		5.1503	0.889068		5.1503	0.87654		5.1503	0.885681		5.1503	0.880875		5.1503	0.886688		5.1503	0.88525		5.1503	0.889693		5.1503	0.888222		5.1502	0.888974		5.1503	0.885631		5.1503	0.885933		5.1503	0.890354		5.1502	0.887651		5.1502	0.889688		5.1503	0.888879
5.2003	0.866688		5.2003	0.890708		5.2003	0.875777		5.2003	0.888308		5.2003	0.880256		5.2003	0.88818		5.2003	0.886774		5.2003	0.888271		5.2003	0.884513		5.2002	0.889507		5.2003	0.884677		5.2003	0.888031		5.2003	0.887924		5.2003	0.888041		5.2002	0.889301		5.2003	0.889703
5.2503	0.866994		5.2503	0.886323		5.2503	0.875889		5.2503	0.888027		5.2503	0.880165		5.2503	0.885468		5.2503	0.882712		5.2503	0.888874		5.2503	0.885891		5.2502	0.888509		5.2503	0.887199		5.2503	0.884691		5.2503	0.889719		5.2503	0.886142		5.2502	0.886386		5.2503	0.890508
5.3003	0.864989		5.3003	0.88813		5.3003	0.872853		5.3003	0.886147		5.3003	0.880111		5.3003	0.88566		5.3003	0.883207		5.3003	0.887493		5.3003	0.884941		5.3002	0.891089		5.3003	0.886371		5.3003	0.887346		5.3003	0.885082		5.3003	0.887886		5.3003	0.887088		5.3003	0.890312
5.3503	0.86504		5.3503	0.886552		5.3503	0.875046		5.3503	0.885469		5.3503	0.877977		5.3503	0.886527		5.3503	0.881162		5.3503	0.888163		5.3503	0.883581		5.3502	0.889984		5.3503	0.884184		5.3503	0.884704		5.3503	0.887356		5.3503	0.88554		5.3503	0.887103		5.3503	0.887647
5.4003	0.867625		5.4003	0.88789		5.4003	0.876566		5.4003	0.884507		5.4003	0.877503		5.4003	0.886578		5.4003	0.881376		5.4003	0.887336		5.4003	0.885201		5.4002	0.885483		5.4003	0.88377		5.4003	0.885689		5.4003	0.885962		5.4003	0.886199		5.4003	0.88537		5.4003	0.888151
5.4503	0.866145		5.4503	0.886779		5.4503	0.873234		5.4503	0.888959		5.4503	0.878606		5.4503	0.885338		5.4503	0.883461		5.4503	0.885415		5.4503	0.884114		5.4502	0.888828		5.4503	0.886087		5.4503	0.884576		5.4503	0.887361		5.4503	0.888071		5.4503	0.884762		5.4503	0.886315
5.5003	0.86331		5.5003	0.889019		5.5003	0.873979		5.5003	0.884512		5.5003	0.873805		5.5003	0.886419		5.5003	0.880599		5.5003	0.885935		5.5003	0.883751		5.5002	0.888485		5.5003	0.88471		5.5003	0.883421		5.5003	0.883987		5.5003	0.884684		5.5003	0.884844		5.5003	0.887912
5.5503	0.863818		5.5503	0.885624		5.5503	0.877231		5.5503	0.880885		5.5503	0.877338		5.5503	0.883921		5.5503	0.881447		5.5503	0.885388		5.5503	0.880554		5.5502	0.887147		5.5503	0.881425		5.5503	0.882874		5.5503	0.885013		5.5503	0.886754		5.5503	0.886854		5.5503	0.887031
5.6003	0.865597		5.6003	0.884909		5.6003	0.870446		5.6003	0.883584		5.6003	0.877404		5.6003	0.882308		5.6003	0.882571		5.6003	0.884909		5.6003	0.882079		5.6003	0.886248		5.6003	0.882667		5.6003	0.885737		5.6003	0.886705		5.6003	0.885746		5.6003	0.885367		5.6003	0.886729
5.6503	0.862358		5.6503	0.885916		5.6503	0.873052		5.6503	0.887415		5.6503	0.877466		5.6503	0.882903		5.6503	0.880387		5.6503	0.884582		5.6503	0.879622		5.6503	0.883042		5.6504	0.880342		5.6503	0.886416		5.6503	0.884224		5.6503	0.88549		5.6503	0.880317		5.6503	0.888235
5.7003	0.860417		5.7003	0.886713		5.7003	0.874502		5.7003	0.881426		5.7003	0.877932		5.7003	0.884439		5.7003	0.880213		5.7003	0.885085		5.7003	0.880374		5.7003	0.885194		5.7004	0.880806		5.7003	0.885448		5.7003	0.884824		5.7003	0.884552		5.7003	0.88427		5.7003	0.886316
5.7503	0.860858		5.7503	0.885629		5.7503	0.873996		5.7503	0.884505		5.7503	0.878652		5.7503	0.881861		5.7503	0.882749		5.7503	0.884958		5.7503	0.880434		5.7503	0.88449		5.7504	0.879217		5.7503	0.878758		5.7503	0.881779		5.7503	0.884551		5.7503	0.883579		5.7503	0.885813
5.8003	0.863833		5.8003	0.884083		5.8003	0.872231		5.8003	0.882753		5.8003	0.877549		5.8003	0.884621		5.8003	0.880517		5.8003	0.884739		5.8003	0.881961		5.8003	0.884588		5.8004	0.882329		5.8003	0.887459		5.8003	0.883494		5.8003	0.884111		5.8003	0.883014		5.8003	0.882286
5.8504	0.859752		5.8503	0.886044		5.8503	0.873477		5.8503	0.883455		5.8503	0.875699		5.8504	0.882186		5.8503	0.8794		5.8503	0.883384		5.8503	0.879466		5.8503	0.882623		5.8504	0.881712		5.8503	0.882538		5.8503	0.883154		5.8503	0.881181		5.8503	0.88317		5.8503	0.881555
5.9004	0.861782		5.9003	0.885249		5.9003	0.871818		5.9003	0.883557		5.9003	0.874303		5.9004	0.881705		5.9003	0.879503		5.9003	0.881325		5.9003	0.878938		5.9003	0.882148		5.9004	0.880745		5.9003	0.88493		5.9003	0.883553		5.9003	0.88358		5.9003	0.881943		5.9003	0.885891
5.9504	0.858733		5.9503	0.882396		5.9503	0.869462		5.9503	0.880244		5.9503	0.875689		5.9504	0.881944		5.9504	0.876972		5.9503	0.880394		5.9503	0.881083		5.9503	0.884811		5.9504	0.881456		5.9503	0.883449		5.9503	0.885396		5.9503	0.881113		5.9503	0.88227		5.9503	0.885438
6.0004	0.858621		6.0003	0.884302		6.0003	0.867153		6.0003	0.881199		6.0003	0.876241		6.0004	0.882634		6.0004	0.877462		6.0003	0.880894		6.0003	0.880286		6.0003	0.881486		6.0004	0.879972		6.0003	0.883671		6.0003	0.884873		6.0003	0.881733		6.0003	0.879674		6.0004	0.883369
6.0504	0.860308		6.0503	0.884245		6.0503	0.87179		6.0503	0.881278		6.0503	0.874221		6.0504	0.882366		6.0504	0.87665		6.0503	0.882276		6.0503	0.880316		6.0503	0.886354		6.0504	0.881552		6.0503	0.882542		6.0503	0.88241		6.0503	0.884673		6.0503	0.88275		6.0504	0.882398
6.1004	0.858456		6.1003	0.882126		6.1003	0.868161		6.1003	0.881101		6.1003	0.873387		6.1004	0.879741		6.1004	0.877265		6.1003	0.881609		6.1003	0.882822		6.1003	0.881127		6.1004	0.881054		6.1003	0.883361		6.1003	0.882613		6.1003	0.88294		6.1003	0.88461		6.1004	0.881685
6.1504	0.859192		6.1503	0.883718		6.1503	0.868747		6.1503	0.880258		6.1503	0.873041		6.1504	0.881481		6.1504	0.877766		6.1503	0.881843		6.1503	0.878602		6.1503	0.882816		6.1504	0.878515		6.1503	0.881486		6.1503	0.881984		6.1503	0.880344		6.1503	0.87789		6.1504	0.879621
6.2004	0.858616		6.2003	0.879646		6.2004	0.871307		6.2003	0.87946		6.2003	0.873805		6.2004	0.87692		6.2004	0.877483		6.2003	0.880117		6.2003	0.879786		6.2003	0.880526		6.2004	0.878502		6.2003	0.880262		6.2003	0.879877		6.2003	0.881116		6.2003	0.880832		6.2004	0.879921
6.2504	0.857652		6.2503	0.879102		6.2504	0.870677		6.2503	0.879392		6.2503	0.872786		6.2504	0.881794		6.2504	0.878334		6.2503	0.881885		6.2503	0.880874		6.2503	0.882845		6.2504	0.878703		6.2503	0.878778		6.2503	0.882997		6.2503	0.882626		6.2503	0.879737		6.2504	0.882606
6.3004	0.854957		6.3003	0.881773		6.3004	0.87189		6.3003	0.879538		6.3003	0.873511		6.3004	0.87867		6.3004	0.875551		6.3003	0.882033		6.3003	0.878297		6.3003	0.883038		6.3004	0.877356		6.3003	0.880121		6.3004	0.882014		6.3003	0.879033		6.3003	0.88015		6.3004	0.882423
6.3504	0.857053		6.3503	0.880405		6.3504	0.867316		6.3503	0.87674		6.3503	0.874497		6.3504	0.879941		6.3504	0.878494		6.3503	0.878418		6.3503	0.877386		6.3503	0.879256		6.3504	0.880016		6.3504	0.879072		6.3504	0.879754		6.3503	0.878775		6.3503	0.879037		6.3504	0.88165
6.4004	0.859999		6.4003	0.880395		6.4004	0.869566		6.4003	0.877519		6.4003	0.872787		6.4004	0.880983		6.4004	0.873705		6.4003	0.881291		6.4003	0.879907		6.4003	0.880475		6.4004	0.876844		6.4004	0.881648		6.4004	0.877851		6.4003	0.880276		6.4003	0.880055		6.4004	0.878499
6.4504	0.857453		6.4503	0.880796		6.4504	0.871025		6.4503	0.874712		6.4503	0.873998		6.4504	0.879008		6.4504	0.876141		6.4503	0.878001		6.4503	0.875677		6.4503	0.879298		6.4504	0.878038		6.4504	0.879769		6.4504	0.880942		6.4503	0.877641		6.4503	0.87846		6.4504	0.880282
6.5004	0.857164		6.5003	0.881983		6.5004	0.868916		6.5003	0.879796		6.5003	0.869289		6.5004	0.878307		6.5004	0.877195		6.5003	0.881746		6.5003	0.877183		6.5003	0.879725		6.5004	0.879129		6.5004	0.880926		6.5004	0.87674		6.5003	0.875825		6.5003	0.875237		6.5004	0.880719
6.5504	0.855202		6.5504	0.878325		6.5504	0.866242		6.5503	0.879154		6.5503	0.8713		6.5504	0.879586		6.5504	0.874472		6.5503	0.877826		6.5503	0.875857		6.5503	0.878624		6.5504	0.879503		6.5504	0.878971		6.5504	0.87996		6.5503	0.878678		6.5503	0.883492		6.5504	0.879396
6.6004	0.856388		6.6004	0.88183		6.6004	0.866182		6.6003	0.877264		6.6003	0.869291		6.6004	0.878966		6.6004	0.873771		6.6004	0.880958		6.6003	0.877619		6.6003	0.877801		6.6004	0.875492		6.6004	0.880275		6.6004	0.87784		6.6003	0.878408		6.6003	0.878417		6.6004	0.878825
6.6504	0.857078		6.6504	0.881831		6.6504	0.868488		6.6503	0.87828		6.6503	0.870522		6.6504	0.878137		6.6504	0.873669		6.6504	0.880164		6.6503	0.877682		6.6503	0.878936		6.6504	0.878099		6.6504	0.87853		6.6504	0.882091		6.6503	0.874896		6.6503	0.877674		6.6504	0.879823
6.7004	0.855972		6.7004	0.880139		6.7004	0.866144		6.7003	0.877171		6.7003	0.871197		6.7004	0.876719		6.7004	0.873629		6.7004	0.882104		6.7004	0.873718		6.7003	0.880675		6.7004	0.876971		6.7004	0.87566		6.7004	0.87739		6.7003	0.879423		6.7003	0.877379		6.7004	0.879338
6.7504	0.857009		6.7504	0.879364		6.7504	0.869382		6.7503	0.876307		6.7503	0.870376		6.7504	0.87389		6.7504	0.87769		6.7504	0.8802		6.7504	0.873715		6.7503	0.879698		6.7504	0.87722		6.7504	0.875273		6.7504	0.878373		6.7503	0.878298		6.7503	0.876514		6.7504	0.878918
6.8004	0.854108		6.8004	0.877836		6.8004	0.867014		6.8003	0.876036		6.8003	0.87062		6.8004	0.879244		6.8004	0.872626		6.8004	0.877518		6.8004	0.874797		6.8003	0.877475		6.8004	0.876498		6.8004	0.876925		6.8004	0.877191		6.8003	0.877927		6.8003	0.875693		6.8004	0.877887
6.8504	0.854567		6.8504	0.877543		6.8504	0.867123		6.8503	0.878254		6.8503	0.868794		6.8504	0.877372		6.8504	0.870742		6.8504	0.877691		6.8504	0.874685		6.8503	0.879037		6.8504	0.876171		6.8504	0.875034		6.8504	0.876949		6.8503	0.875981		6.8503	0.877277		6.8504	0.877532
6.9004	0.853312		6.9004	0.876346		6.9004	0.864496		6.9004	0.876021		6.9003	0.867715		6.9004	0.876068		6.9004	0.873423		6.9004	0.875767		6.9004	0.874182		6.9003	0.878109		6.9004	0.87712		6.9004	0.875674		6.9004	0.875728		6.9003	0.874939		6.9003	0.874712		6.9004	0.878011
6.9504	0.854182		6.9504	0.880698		6.9504	0.863658		6.9504	0.873245		6.9503	0.86709		6.9504	0.8786		6.9504	0.873596		6.9504	0.878815		6.9504	0.872387		6.9503	0.879067		6.9504	0.87832		6.9504	0.877197		6.9504	0.878069		6.9503	0.878232		6.9503	0.877514		6.9504	0.87726
7.0004	0.853525		7.0004	0.877748		7.0004	0.863177		7.0004	0.876142		7.0004	0.868825		7.0004	0.878828		7.0004	0.872531		7.0004	0.876728		7.0004	0.874786		7.0003	0.877659		7.0004	0.873882		7.0004	0.877755		7.0004	0.876202		7.0004	0.875848		7.0003	0.875146		7.0004	0.877148
7.0504	0.853822		7.0504	0.879469		7.0504	0.863952		7.0504	0.87768		7.0504	0.869598		7.0504	0.875555		7.0504	0.873389		7.0504	0.877935		7.0504	0.874483		7.0503	0.874759		7.0504	0.872849		7.0504	0.873985		7.0504	0.873884		7.0504	0.875557		7.0503	0.877415		7.0504	0.880427
7.1004	0.853449		7.1004	0.878088		7.1004	0.863608		7.1004	0.874587		7.1004	0.868799		7.1004	0.871995		7.1004	0.87116		7.1004	0.878856		7.1004	0.870409		7.1003	0.877309		7.1004	0.875831		7.1004	0.876635		7.1004	0.87386		7.1004	0.873884		7.1004	0.875927		7.1004	0.87514
7.1504	0.851853		7.1504	0.875353		7.1504	0.865833		7.1504	0.874001		7.1504	0.86964		7.1504	0.874032		7.1504	0.870878		7.1504	0.876215		7.1504	0.870549		7.1503	0.876054		7.1504	0.873169		7.1504	0.875857		7.1504	0.876942		7.1504	0.875456		7.1504	0.876619		7.1504	0.878143
7.2004	0.853278		7.2004	0.87832		7.2004	0.866331		7.2004	0.874823		7.2004	0.866265		7.2004	0.875294		7.2004	0.870392		7.2004	0.876592		7.2004	0.872881		7.2003	0.877709		7.2004	0.876192		7.2004	0.876704		7.2004	0.871848		7.2004	0.875755		7.2004	0.874328		7.2004	0.87263
7.2504	0.853643		7.2504	0.874497		7.2504	0.865969		7.2504	0.874983		7.2504	0.869249		7.2504	0.878351		7.2504	0.872756		7.2504	0.872912		7.2504	0.869308		7.2503	0.874948		7.2504	0.871995		7.2504	0.876184		7.2504	0.876577		7.2504	0.874995		7.2504	0.874576		7.2504	0.87831
7.3004	0.850668		7.3004	0.87502		7.3004	0.863987		7.3004	0.875106		7.3004	0.868389		7.3004	0.877551		7.3004	0.87379		7.3004	0.876388		7.3004	0.869453		7.3003	0.875964		7.3004	0.873747		7.3004	0.876693		7.3004	0.875085		7.3004	0.873204		7.3004	0.870526		7.3004	0.874288
7.3504	0.851213		7.3504	0.877389		7.3504	0.864342		7.3504	0.874817		7.3504	0.866522		7.3504	0.874255		7.3504	0.870575		7.3504	0.875435		7.3504	0.873917		7.3503	0.874534		7.3504	0.87195		7.3504	0.875612		7.3504	0.876378		7.3504	0.873715		7.3504	0.872913		7.3504	0.875013
7.4004	0.852727		7.4004	0.877098		7.4004	0.861361		7.4004	0.872932		7.4004	0.866419		7.4004	0.875388		7.4004	0.871101		7.4004	0.873804		7.4004	0.874029		7.4004	0.875902		7.4004	0.872387		7.4004	0.873904		7.4004	0.875245		7.4004	0.874779		7.4004	0.873746		7.4004	0.875074
7.4504	0.853491		7.4504	0.875551		7.4504	0.866179		7.4504	0.875756		7.4504	0.864724		7.4504	0.874666		7.4504	0.871624		7.4504	0.876333		7.4504	0.872506		7.4504	0.876589		7.4504	0.874753		7.4504	0.87229		7.4504	0.872202		7.4504	0.87478		7.4504	0.87469		7.4504	0.873774
7.5004	0.851205		7.5004	0.873486		7.5004	0.861817		7.5004	0.87459		7.5004	0.86664		7.5004	0.874138		7.5004	0.86997		7.5004	0.872044		7.5004	0.872616		7.5004	0.875244		7.5005	0.871066		7.5004	0.875381		7.5004	0.86893		7.5004	0.874089		7.5004	0.874246		7.5004	0.875135
7.5504	0.851588		7.5504	0.874512		7.5504	0.860188		7.5504	0.873348		7.5504	0.865171		7.5504	0.871348		7.5504	0.871039		7.5504	0.875164		7.5504	0.871822		7.5504	0.874607		7.5505	0.870286		7.5504	0.872861		7.5504	0.874703		7.5504	0.870449		7.5504	0.87407		7.5504	0.876082
7.6004	0.847566		7.6004	0.873618		7.6004	0.862791		7.6004	0.872803		7.6004	0.863902		7.6004	0.871615		7.6004	0.868245		7.6004	0.87429		7.6004	0.872892		7.6004	0.875458		7.6005	0.872343		7.6004	0.873675		7.6004	0.868959		7.6004	0.871627		7.6004	0.873115		7.6004	0.873538
7.6504	0.849566		7.6504	0.873283		7.6504	0.860936		7.6504	0.872145		7.6504	0.866034		7.6505	0.871207		7.6504	0.868665		7.6504	0.871736		7.6504	0.869619		7.6504	0.872185		7.6505	0.872431		7.6504	0.87137		7.6504	0.873548		7.6504	0.873388		7.6504	0.873395		7.6504	0.87549
7.7005	0.851749		7.7004	0.874559		7.7004	0.860098		7.7004	0.871623		7.7004	0.861312		7.7005	0.871916		7.7004	0.868945		7.7004	0.87108		7.7004	0.869857		7.7004	0.873594		7.7005	0.871016		7.7004	0.872869		7.7004	0.8711		7.7004	0.87409		7.7004	0.872018		7.7004	0.873445
7.7505	0.84804		7.7504	0.875566		7.7504	0.860388		7.7504	0.870422		7.7504	0.864496		7.7505	0.873394		7.7505	0.870538		7.7504	0.873379		7.7504	0.870014		7.7504	0.874757		7.7505	0.87217		7.7504	0.871356		7.7504	0.873217		7.7504	0.873656		7.7504	0.871242		7.7504	0.874546
7.8005	0.849649		7.8004	0.875932		7.8004	0.859826		7.8004	0.871952		7.8004	0.863258		7.8005	0.875668		7.8005	0.870573		7.8004	0.871368		7.8004	0.867863		7.8004	0.873074		7.8005	0.871378		7.8004	0.872563		7.8004	0.870481		7.8004	0.872558		7.8004	0.872916		7.8005	0.876475
7.8505	0.850098		7.8504	0.873374		7.8504	0.86048		7.8504	0.871666		7.8504	0.863923		7.8505	0.87197		7.8505	0.867936		7.8504	0.870652		7.8504	0.87053		7.8504	0.872345		7.8505	0.870521		7.8504	0.872869		7.8504	0.872927		7.8504	0.873435		7.8504	0.874063		7.8505	0.869212
7.9005	0.847069		7.9004	0.874696		7.9004	0.862354		7.9004	0.871638		7.9004	0.865476		7.9005	0.8706		7.9005	0.866582		7.9004	0.872288		7.9004	0.868419		7.9004	0.871655		7.9005	0.86853		7.9004	0.87119		7.9004	0.871534		7.9004	0.872001		7.9004	0.870485		7.9005	0.873981
7.9505	0.848487		7.9504	0.874766		7.9504	0.856301		7.9504	0.869912		7.9504	0.86378		7.9505	0.875418		7.9505	0.869536		7.9504	0.871667		7.9504	0.869814		7.9504	0.873269		7.9505	0.870274		7.9504	0.872138		7.9504	0.869804		7.9504	0.873177		7.9504	0.871776		7.9505	0.875489
8.0005	0.84761		8.0004	0.874493		8.0005	0.859463		8.0004	0.870952		8.0004	0.862027		8.0005	0.869849		8.0005	0.868537		8.0004	0.872297		8.0004	0.870484		8.0004	0.871685		8.0005	0.869892		8.0004	0.871155		8.0004	0.872705		8.0004	0.871414		8.0004	0.869362		8.0005	0.871794
8.0505	0.845935		8.0504	0.874067		8.0505	0.858726		8.0504	0.870619		8.0504	0.863161		8.0505	0.872497		8.0505	0.866022		8.0504	0.871231		8.0504	0.869541		8.0504	0.873317		8.0505	0.870072		8.0504	0.87062		8.0504	0.871389		8.0504	0.871807		8.0504	0.87075		8.0505	0.876093
8.1005	0.847281		8.1004	0.873115		8.1005	0.857542		8.1004	0.867859		8.1004	0.86361		8.1005	0.86985		8.1005	0.866021		8.1004	0.870417		8.1004	0.869135		8.1004	0.873815		8.1005	0.869557		8.1004	0.870433		8.1004	0.871139		8.1004	0.869379		8.1004	0.87184		8.1005	0.872805
8.1505	0.846187		8.1504	0.870964		8.1505	0.85882		8.1504	0.868761		8.1504	0.861538		8.1505	0.869504		8.1505	0.864905		8.1504	0.872687		8.1504	0.866833		8.1504	0.874554		8.1505	0.868693		8.1504	0.872445		8.1505	0.868508		8.1504	0.868479		8.1504	0.871235		8.1505	0.874388
8.2005	0.846322		8.2004	0.872886		8.2005	0.856269		8.2004	0.870703		8.2004	0.864874		8.2005	0.870115		8.2005	0.865732		8.2004	0.867872		8.2004	0.869527		8.2004	0.870756		8.2005	0.868		8.2005	0.871495		8.2005	0.869067		8.2004	0.872531		8.2004	0.872061		8.2005	0.874343
8.2505	0.848713		8.2504	0.872597		8.2505	0.85703		8.2504	0.871271		8.2504	0.862706		8.2505	0.873265		8.2505	0.867057		8.2504	0.869819		8.2504	0.869932		8.2504	0.872579		8.2505	0.868536		8.2505	0.869206		8.2505	0.869454		8.2504	0.870657		8.2504	0.871371		8.2505	0.873362
8.3005	0.844404		8.3004	0.870744		8.3005	0.856788		8.3004	0.872393		8.3004	0.861521		8.3005	0.869599		8.3005	0.86627		8.3004	0.872145		8.3004	0.869696		8.3004	0.86804		8.3005	0.870918		8.3005	0.870138		8.3005	0.869697		8.3004	0.870096		8.3004	0.870007		8.3005	0.873034
8.3505	0.848385		8.3504	0.873211		8.3505	0.858652		8.3504	0.870437		8.3504	0.861843		8.3505	0.871795		8.3505	0.866955		8.3504	0.87221		8.3504	0.867016		8.3504	0.870776		8.3505	0.867316		8.3505	0.871811		8.3505	0.870607		8.3504	0.870198		8.3504	0.868761		8.3505	0.87152
8.4005	0.844754		8.4005	0.873704		8.4005	0.857329		8.4004	0.869511		8.4004	0.861712		8.4005	0.871447		8.4005	0.866995		8.4004	0.869487		8.4004	0.866045		8.4004	0.870922		8.4005	0.868238		8.4005	0.870474		8.4005	0.864478		8.4004	0.870613		8.4004	0.87022		8.4005	0.871608
8.4505	0.844271		8.4505	0.871234		8.4505	0.853312		8.4504	0.870027		8.4504	0.862226		8.4505	0.869748		8.4505	0.863677		8.4505	0.868591		8.4504	0.866929		8.4504	0.869705		8.4505	0.866631		8.4505	0.869696		8.4505	0.868935		8.4504	0.869686		8.4504	0.871987		8.4505	0.871016
8.5005	0.845026		8.5005	0.872679		8.5005	0.856833		8.5004	0.871859		8.5004	0.862357		8.5005	0.868042		8.5005	0.866638		8.5005	0.869243		8.5004	0.868057		8.5004	0.869757		8.5005	0.870741		8.5005	0.867565		8.5005	0.868589		8.5004	0.86962		8.5004	0.869548		8.5005	0.871598
8.5505	0.843443		8.5505	0.871464		8.5505	0.854622		8.5504	0.870238		8.5504	0.860197		8.5505	0.867392		8.5505	0.867174		8.5505	0.867945		8.5505	0.866345		8.5504	0.871019		8.5505	0.867892		8.5505	0.871398		8.5505	0.866543		8.5504	0.871309		8.5504	0.869327		8.5505	0.870695
8.6005	0.843734		8.6005	0.86981		8.6005	0.854363		8.6004	0.867885		8.6004	0.858257		8.6005	0.867289		8.6005	0.862749		8.6005	0.869738		8.6005	0.869586		8.6004	0.869183		8.6005	0.864355		8.6005	0.86857		8.6005	0.869928		8.6004	0.868436		8.6004	0.867521		8.6005	0.870279
8.6505	0.845152		8.6505	0.870997		8.6505	0.855457		8.6504	0.868857		8.6504	0.859545		8.6505	0.8671		8.6505	0.865133		8.6505	0.868462		8.6505	0.866109		8.6504	0.868624		8.6505	0.866455		8.6505	0.868179		8.6505	0.867903		8.6504	0.870744		8.6504	0.868248		8.6505	0.871101
8.7005	0.843836		8.7005	0.871021		8.7005	0.856997		8.7004	0.867033		8.7004	0.857622		8.7005	0.86852		8.7005	0.866904		8.7005	0.867202		8.7005	0.864202		8.7004	0.870251		8.7005	0.866885		8.7005	0.869414		8.7005	0.866176		8.7004	0.865717		8.7004	0.867645		8.7005	0.868645
8.7505	0.845054		8.7505	0.872164		8.7505	0.854125		8.7505	0.867036		8.7504	0.860292		8.7505	0.870236		8.7505	0.865117		8.7505	0.871128		8.7505	0.865583		8.7504	0.869507		8.7505	0.865383		8.7505	0.869039		8.7505	0.867965		8.7504	0.870098		8.7504	0.867735		8.7505	0.870838
8.8005	0.845651		8.8005	0.87149		8.8005	0.854501		8.8005	0.867004		8.8005	0.861085		8.8005	0.870029		8.8005	0.86308		8.8005	0.867613		8.8005	0.867561		8.8004	0.871074		8.8005	0.866864		8.8005	0.870971		8.8005	0.868762		8.8004	0.867341		8.8004	0.869058		8.8005	0.871102
8.8505	0.842459		8.8505	0.871384		8.8505	0.8536		8.8505	0.867408		8.8505	0.858361		8.8505	0.868283		8.8505	0.865152		8.8505	0.867118		8.8505	0.866993		8.8504	0.871693		8.8505	0.868397		8.8505	0.867713		8.8505	0.869113		8.8505	0.865671		8.8504	0.86671		8.8505	0.868865
8.9005	0.84477		8.9005	0.870249		8.9005	0.853984		8.9005	0.86685		8.9005	0.861638		8.9005	0.867096		8.9005	0.864232		8.9005	0.869701		8.9005	0.863867		8.9004	0.868405		8.9005	0.865487		8.9005	0.86993		8.9005	0.866215		8.9005	0.866851		8.9004	0.868274		8.9005	0.872127
8.9505	0.844455		8.9505	0.868981		8.9505	0.851855		8.9505	0.86525		8.9505	0.858085		8.9505	0.867697		8.9505	0.863794		8.9505	0.86869		8.9505	0.8678		8.9504	0.870559		8.9505	0.869413		8.9505	0.87037		8.9505	0.866677		8.9505	0.869221		8.9505	0.866972		8.9505	0.869338
9.0005	0.842227		9.0005	0.868041		9.0005	0.856676		9.0005	0.867431		9.0005	0.858872		9.0005	0.866279		9.0005	0.860339		9.0005	0.868499		9.0005	0.865878		9.0004	0.868488		9.0005	0.865943		9.0005	0.869333		9.0005	0.865654		9.0005	0.867208		9.0005	0.86922		9.0005	0.868384
9.0505	0.845581		9.0505	0.871834		9.0505	0.854331		9.0505	0.863977		9.0505	0.858337		9.0505	0.86709		9.0505	0.862377		9.0505	0.868965		9.0505	0.864776		9.0504	0.868504		9.0505	0.869329		9.0505	0.868557		9.0505	0.867212		9.0505	0.869414		9.0505	0.865572		9.0505	0.868164
9.1005	0.841056		9.1005	0.867131		9.1005	0.853383		9.1005	0.867014		9.1005	0.856844		9.1005	0.866319		9.1005	0.863108		9.1005	0.869557		9.1005	0.867057		9.1004	0.870622		9.1005	0.864002		9.1005	0.865875		9.1005	0.866075		9.1005	0.867482		9.1005	0.865947		9.1005	0.868146
9.1505	0.842227		9.1505	0.86911		9.1505	0.85366		9.1505	0.868574		9.1505	0.858255		9.1505	0.865841		9.1505	0.862214		9.1505	0.86763		9.1505	0.863772		9.1504	0.868567		9.1505	0.863261		9.1505	0.867621		9.1505	0.867997		9.1505	0.866208		9.1505	0.869636		9.1505	0.868511
9.2005	0.841751		9.2005	0.86748		9.2005	0.854223		9.2005	0.866154		9.2005	0.859649		9.2005	0.866853		9.2005	0.860822		9.2005	0.866023		9.2005	0.867927		9.2004	0.867814		9.2005	0.86515		9.2005	0.867223		9.2005	0.863804		9.2005	0.867305		9.2005	0.865653		9.2005	0.868489
9.2505	0.842578		9.2505	0.86695		9.2505	0.854488		9.2505	0.865985		9.2505	0.857605		9.2505	0.866712		9.2505	0.863326		9.2505	0.865368		9.2505	0.864933		9.2505	0.870654		9.2505	0.865585		9.2505	0.866655		9.2505	0.865308		9.2505	0.863577		9.2505	0.865938		9.2505	0.867018
9.3005	0.842412		9.3005	0.868556		9.3005	0.854119		9.3005	0.8669		9.3005	0.857719		9.3005	0.865744		9.3005	0.860325		9.3005	0.866437		9.3005	0.863438		9.3005	0.868472		9.3006	0.86579		9.3005	0.866124		9.3005	0.865214		9.3005	0.866327		9.3005	0.86617		9.3005	0.862806
9.3505	0.840934		9.3505	0.869483		9.3505	0.853701		9.3505	0.865731		9.3505	0.857705		9.3505	0.864038		9.3505	0.861005		9.3505	0.865887		9.3505	0.863683		9.3505	0.867954		9.3506	0.862888		9.3505	0.865329		9.3505	0.86768		9.3505	0.869236		9.3505	0.866623		9.3505	0.867779
9.4005	0.841587		9.4005	0.869487		9.4005	0.855347		9.4005	0.865288		9.4005	0.855813		9.4005	0.864405		9.4005	0.861938		9.4005	0.867188		9.4005	0.862445		9.4005	0.864273		9.4006	0.864991		9.4005	0.867132		9.4005	0.863885		9.4005	0.865211		9.4005	0.863969		9.4005	0.868283
9.4505	0.841314		9.4505	0.86621		9.4505	0.85351		9.4505	0.863647		9.4505	0.857404		9.4505	0.863996		9.4505	0.861533		9.4505	0.863376		9.4505	0.861792		9.4505	0.865476		9.4506	0.861996		9.4505	0.865882		9.4505	0.860582		9.4505	0.863022		9.4505	0.863684		9.4505	0.866639
9.5006	0.840433		9.5005	0.870642		9.5005	0.852802		9.5005	0.864451		9.5005	0.856309		9.5006	0.865356		9.5005	0.860741		9.5005	0.866755		9.5005	0.863341		9.5005	0.864778		9.5006	0.862155		9.5005	0.869305		9.5005	0.863317		9.5005	0.864989		9.5005	0.865817		9.5005	0.868321
9.5506	0.841218		9.5505	0.86961		9.5505	0.852993		9.5505	0.865547		9.5505	0.855905		9.5506	0.86326		9.5505	0.859447		9.5505	0.866576		9.5505	0.860755		9.5505	0.865736		9.5506	0.863587		9.5505	0.864459		9.5505	0.866225		9.5505	0.864477		9.5505	0.864362		9.5505	0.866857
9.6006	0.842134		9.6005	0.868482		9.6005	0.852339		9.6005	0.866609		9.6005	0.858575		9.6006	0.866615		9.6006	0.864046		9.6005	0.867145		9.6005	0.864514		9.6005	0.863669		9.6006	0.864918		9.6005	0.864649		9.6005	0.864237		9.6005	0.867264		9.6005	0.864909		9.6005	0.866311
9.6506	0.841161		9.6505	0.866813		9.6505	0.852635		9.6505	0.864906		9.6505	0.858306		9.6506	0.864405		9.6506	0.86315		9.6505	0.866602		9.6505	0.864092		9.6505	0.864292		9.6506	0.861621		9.6505	0.864052		9.6505	0.864183		9.6505	0.867105		9.6505	0.865142		9.6506	0.86821
9.7006	0.839644		9.7005	0.864691		9.7005	0.853077		9.7005	0.865302		9.7005	0.855988		9.7006	0.864357		9.7006	0.861848		9.7005	0.867438		9.7005	0.863171		9.7005	0.865743		9.7006	0.862563		9.7005	0.863695		9.7005	0.863122		9.7005	0.865795		9.7005	0.863543		9.7006	0.866216
9.7506	0.841119		9.7505	0.867744		9.7505	0.850197		9.7505	0.863987		9.7505	0.85552		9.7506	0.865257		9.7506	0.859433		9.7505	0.864281		9.7505	0.862228		9.7505	0.867715		9.7506	0.862619		9.7505	0.864991		9.7505	0.86346		9.7505	0.86534		9.7505	0.864048		9.7506	0.86711
9.8006	0.839268		9.8005	0.865813		9.8005	0.853257		9.8005	0.864192		9.8005	0.854495		9.8006	0.86614		9.8006	0.860635		9.8005	0.864865		9.8005	0.859516		9.8005	0.865732		9.8006	0.860529		9.8005	0.862846		9.8005	0.864734		9.8005	0.865363		9.8005	0.860775		9.8006	0.86607
9.8506	0.841444		9.8505	0.866667		9.8506	0.854888		9.8505	0.862191		9.8505	0.856922		9.8506	0.863691		9.8506	0.860861		9.8505	0.863859		9.8505	0.862009		9.8505	0.865921		9.8506	0.861466		9.8505	0.863543		9.8505	0.863746		9.8505	0.86727		9.8505	0.860726		9.8506	0.866864
9.9006	0.83874		9.9005	0.866606		9.9006	0.850066		9.9005	0.862903		9.9005	0.854834		9.9006	0.863554		9.9006	0.860236		9.9005	0.865318		9.9005	0.862874		9.9005	0.863973		9.9006	0.862137		9.9005	0.863889		9.9005	0.859881		9.9005	0.867726		9.9005	0.864096		9.9006	0.867465
9.9506	0.839937		9.9505	0.868541		9.9506	0.850428		9.9505	0.865727		9.9505	0.856762		9.9506	0.865806		9.9506	0.861109		9.9505	0.868058		9.9505	0.86243		9.9505	0.864241		9.9506	0.864196		9.9505	0.867197		9.9506	0.86212		9.9505	0.866482		9.9505	0.864446		9.9506	0.868327
10.0006	0.840539		10.0005	0.864792		10.0006	0.848754		10.0005	0.865416		10.0005	0.855214		10.0006	0.862155		10.0006	0.86198		10.0005	0.866681		10.0005	0.862413		10.0005	0.863622		10.0006	0.860087		10.0006	0.864754		10.0006	0.863683		10.0005	0.864212		10.0005	0.864436		10.0006	0.866847
10.0506	0.839242		10.0505	0.86719		10.0506	0.851236		10.0505	0.862485		10.0505	0.856026		10.0506	0.863566		10.0506	0.862739		10.0505	0.864589		10.0505	0.863403		10.0505	0.864312		10.0506	0.862768		10.0506	0.863818		10.0506	0.863385		10.0505	0.865783		10.0505	0.863957		10.0506	0.865058
10.1006	0.838345		10.1005	0.863215		10.1006	0.850651		10.1005	0.861917		10.1005	0.855119		10.1006	0.865314		10.1006	0.858297		10.1005	0.862766		10.1005	0.863304		10.1005	0.868172		10.1006	0.863231		10.1006	0.864309		10.1006	0.863774		10.1005	0.866174		10.1005	0.860913		10.1006	0.867046
10.1506	0.837205		10.1505	0.865694		10.1506	0.84949		10.1505	0.862282		10.1505	0.853371		10.1506	0.86352		10.1506	0.861867		10.1505	0.863582		10.1505	0.862374		10.1505	0.864478		10.1506	0.860881		10.1506	0.862127		10.1506	0.860994		10.1505	0.865807		10.1505	0.860839		10.1506	0.866473
10.2006	0.837414		10.2006	0.865654		10.2006	0.849149		10.2005	0.858968		10.2005	0.853704		10.2006	0.862287		10.2006	0.857813		10.2005	0.865186		10.2005	0.862851		10.2005	0.862887		10.2006	0.862818		10.2006	0.863364		10.2006	0.862501		10.2005	0.865173		10.2005	0.862115		10.2006	0.865058
10.2506	0.839149		10.2506	0.862786		10.2506	0.85037		10.2505	0.864256		10.2505	0.854261		10.2506	0.865584		10.2506	0.86083		10.2506	0.865972		10.2505	0.861928		10.2505	0.862523		10.2506	0.862207		10.2506	0.866449		10.2506	0.863272		10.2505	0.864079		10.2505	0.861984		10.2506	0.862702
10.3006	0.838678		10.3006	0.865456		10.3006	0.848781		10.3005	0.863488		10.3005	0.854018		10.3006	0.861519		10.3006	0.859514		10.3006	0.862358		10.3005	0.861621		10.3005	0.862226		10.3006	0.861399		10.3006	0.863274		10.3006	0.861494		10.3005	0.862399		10.3005	0.861343		10.3006	0.864686
10.3506	0.836208		10.3506	0.865193		10.3506	0.851334		10.3505	0.864847		10.3505	0.853764		10.3506	0.863672		10.3506	0.859694		10.3506	0.86384		10.3506	0.862215		10.3505	0.865386		10.3506	0.860869		10.3506	0.864525		10.3506	0.862115		10.3505	0.862163		10.3505	0.863448		10.3506	0.86412
10.4006	0.839955		10.4006	0.864983		10.4006	0.848875		10.4005	0.863123		10.4005	0.854085		10.4006	0.861793		10.4006	0.858331		10.4006	0.859177		10.4006	0.859701		10.4005	0.864855		10.4006	0.860916		10.4006	0.862938		10.4006	0.863237		10.4005	0.863941		10.4005	0.861226		10.4006	0.862535
10.4506	0.837306		10.4506	0.867005		10.4506	0.849684		10.4505	0.862654		10.4505	0.852632		10.4506	0.864018		10.4506	0.860141		10.4506	0.863539		10.4506	0.859344		10.4505	0.86099		10.4506	0.85936		10.4506	0.862282		10.4506	0.861911		10.4505	0.865234		10.4505	0.860735		10.4506	0.862798
10.5006	0.837253		10.5006	0.861389		10.5006	0.849262		10.5005	0.862423		10.5005	0.854699		10.5006	0.862767		10.5006	0.860171		10.5006	0.864171		10.5006	0.858817		10.5005	0.862194		10.5006	0.858749		10.5006	0.863982		10.5006	0.859069		10.5005	0.862851		10.5005	0.861916		10.5006	0.863968
10.5506	0.837655		10.5506	0.862741		10.5506	0.849163		10.5506	0.863292		10.5505	0.852291		10.5506	0.861177		10.5506	0.861175		10.5506	0.863572		10.5506	0.860138		10.5505	0.86291		10.5506	0.860857		10.5506	0.864215		10.5506	0.861903		10.5505	0.862809		10.5505	0.861491		10.5506	0.863641
10.6006	0.836288		10.6006	0.864307		10.6006	0.8484		10.6006	0.86034		10.6005	0.851694		10.6006	0.859441		10.6006	0.859418		10.6006	0.863487		10.6006	0.861077		10.6005	0.863601		10.6006	0.862067		10.6006	0.860261		10.6006	0.86053		10.6005	0.863527		10.6005	0.860087		10.6006	0.863983
10.6506	0.838346		10.6506	0.863482		10.6506	0.848891		10.6506	0.864053		10.6506	0.85215		10.6506	0.860382		10.6506	0.859171		10.6506	0.86265		10.6506	0.858493		10.6505	0.863744		10.6506	0.861161		10.6506	0.86468		10.6506	0.861207		10.6506	0.861445		10.6505	0.860172		10.6506	0.863208
10.7006	0.836797		10.7006	0.863107		10.7006	0.84826		10.7006	0.859898		10.7006	0.853688		10.7006	0.862255		10.7006	0.856754		10.7006	0.860623		10.7006	0.860217		10.7005	0.861727		10.7006	0.860392		10.7006	0.864774		10.7006	0.862741		10.7006	0.864818		10.7005	0.863076		10.7006	0.861992
10.7506	0.837407		10.7506	0.865411		10.7506	0.851571		10.7506	0.859307		10.7506	0.852068		10.7506	0.861987		10.7506	0.858289		10.7506	0.864036		10.7506	0.860582		10.7505	0.862818		10.7506	0.861399		10.7506	0.862876		10.7506	0.859511		10.7506	0.860531		10.7506	0.862782		10.7506	0.863563
10.8006	0.836318		10.8006	0.865492		10.8006	0.846551		10.8006	0.861076		10.8006	0.851819		10.8006	0.861105		10.8006	0.857569		10.8006	0.862487		10.8006	0.860523		10.8005	0.861612		10.8006	0.860533		10.8006	0.863883		10.8006	0.860145		10.8006	0.860975		10.8006	0.85844		10.8006	0.863661
10.8506	0.835942		10.8506	0.862992		10.8506	0.847151		10.8506	0.859929		10.8506	0.854257		10.8506	0.862566		10.8506	0.856159		10.8506	0.860783		10.8506	0.857674		10.8505	0.862723		10.8506	0.858421		10.8506	0.862527		10.8506	0.862056		10.8506	0.862354		10.8506	0.861425		10.8506	0.864066
10.9006	0.834706		10.9006	0.862286		10.9006	0.848152		10.9006	0.857904		10.9006	0.852141		10.9006	0.861157		10.9006	0.855916		10.9006	0.862896		10.9006	0.85974		10.9005	0.862104		10.9006	0.860128		10.9006	0.863938		10.9006	0.863351		10.9006	0.861308		10.9006	0.860767		10.9006	0.86177
10.9506	0.833771		10.9506	0.864153		10.9506	0.847914		10.9506	0.861783		10.9506	0.851259		10.9506	0.861277		10.9506	0.859097		10.9506	0.86339		10.9506	0.860005		10.9505	0.86171		10.9506	0.858449		10.9506	0.86327		10.9506	0.860415		10.9506	0.860574		10.9506	0.862906		10.9506	0.862835
11.0006	0.834624		11.0006	0.862822		11.0006	0.848512		11.0006	0.85826		11.0006	0.852156		11.0006	0.861532		11.0006	0.854931		11.0006	0.86254		11.0006	0.859689		11.0005	0.859674		11.0006	0.858892		11.0006	0.860646		11.0006	0.858454		11.0006	0.861968		11.0006	0.860229		11.0006	0.863252
11.0506	0.834468		11.0506	0.865163		11.0506	0.848921		11.0506	0.863783		11.0506	0.851046		11.0506	0.862618		11.0506	0.856541		11.0506	0.859883		11.0506	0.855269		11.0506	0.862129		11.0506	0.857736		11.0506	0.862971		11.0506	0.85963		11.0506	0.860486		11.0506	0.864079		11.0506	0.862186
11.1006	0.834411		11.1006	0.862199		11.1006	0.844703		11.1006	0.860721		11.1006	0.850442		11.1006	0.861771		11.1006	0.858478		11.1006	0.860225		11.1006	0.857323		11.1006	0.863414		11.1006	0.856764		11.1006	0.859812		11.1006	0.860004		11.1006	0.860361		11.1006	0.861377		11.1006	0.863846
11.1506	0.836405		11.1506	0.859973		11.1506	0.846408		11.1506	0.859653		11.1506	0.849687		11.1506	0.85864		11.1506	0.860117		11.1506	0.861367		11.1506	0.857004		11.1506	0.861369		11.1507	0.855806		11.1506	0.861433		11.1506	0.858727		11.1506	0.863265		11.1506	0.859575		11.1506	0.863775
11.2006	0.838402		11.2006	0.862287		11.2006	0.846168		11.2006	0.859752		11.2006	0.850978		11.2006	0.858696		11.2006	0.859646		11.2006	0.862556		11.2006	0.859467		11.2006	0.86167		11.2007	0.859872		11.2006	0.862088		11.2006	0.860005		11.2006	0.860298		11.2006	0.860293		11.2006	0.861956
11.2506	0.834344		11.2506	0.862125		11.2506	0.845622		11.2506	0.85844		11.2506	0.848891		11.2506	0.860763		11.2506	0.855639		11.2506	0.862855		11.2506	0.857792		11.2506	0.862976		11.2507	0.859939		11.2506	0.859793		11.2506	0.859489		11.2506	0.862243		11.2506	0.859731		11.2506	0.866471
11.3006	0.834545		11.3006	0.862226		11.3006	0.848301		11.3006	0.857683		11.3006	0.851322		11.3007	0.861969		11.3006	0.855154		11.3006	0.859392		11.3006	0.85636		11.3006	0.860294		11.3007	0.858796		11.3006	0.861274		11.3006	0.862351		11.3006	0.859228		11.3006	0.859718		11.3006	0.858812
11.3507	0.836066		11.3506	0.860893		11.3506	0.847719		11.3506	0.857358		11.3506	0.848676		11.3507	0.856091		11.3506	0.855519		11.3506	0.861212		11.3506	0.856417		11.3506	0.859174		11.3507	0.85631		11.3506	0.862079		11.3506	0.861308		11.3506	0.862128		11.3506	0.858516		11.3506	0.861943
11.4007	0.833558		11.4006	0.862486		11.4006	0.84844		11.4006	0.858953		11.4006	0.850454		11.4007	0.861606		11.4007	0.856314		11.4006	0.861866		11.4006	0.856474		11.4006	0.861108		11.4007	0.858895		11.4006	0.861735		11.4006	0.859399		11.4006	0.86267		11.4006	0.861636		11.4006	0.859773
11.4507	0.833589		11.4506	0.862055		11.4506	0.844646		11.4506	0.858425		11.4506	0.850819		11.4507	0.860429		11.4507	0.854719		11.4506	0.860049		11.4506	0.857279		11.4506	0.859641		11.4507	0.857405		11.4506	0.858606		11.4506	0.860598		11.4506	0.860543		11.4506	0.858318		11.4507	0.859887
11.5007	0.834069		11.5006	0.859321		11.5006	0.847305		11.5006	0.860912		11.5006	0.849781		11.5007	0.857407		11.5007	0.856415		11.5006	0.860131		11.5006	0.855449		11.5006	0.860831		11.5007	0.859614		11.5006	0.858172		11.5006	0.860087		11.5006	0.863555		11.5006	0.859303		11.5007	0.86223
11.5507	0.835337		11.5506	0.863122		11.5506	0.845717		11.5506	0.857173		11.5506	0.851063		11.5507	0.861379		11.5507	0.856716		11.5506	0.857551		11.5506	0.857731		11.5506	0.860648		11.5507	0.855923		11.5506	0.861418		11.5506	0.859029		11.5506	0.860387		11.5506	0.857506		11.5507	0.862382
11.6007	0.835342		11.6006	0.861228		11.6006	0.846403		11.6006	0.859116		11.6006	0.851381		11.6007	0.860862		11.6007	0.855666		11.6006	0.860389		11.6006	0.858525		11.6006	0.861449		11.6007	0.858973		11.6006	0.859215		11.6006	0.86079		11.6006	0.864372		11.6006	0.860386		11.6007	0.863729
11.6507	0.833071		11.6506	0.863735		11.6507	0.84679		11.6506	0.858875		11.6506	0.852101		11.6507	0.856454		11.6507	0.855129		11.6506	0.85879		11.6506	0.855945		11.6506	0.861592		11.6507	0.858996		11.6506	0.856002		11.6506	0.858475		11.6506	0.859706		11.6506	0.862118		11.6507	0.86043
11.7007	0.834099		11.7006	0.861737		11.7007	0.846537		11.7006	0.857659		11.7006	0.850513		11.7007	0.85605		11.7007	0.855198		11.7006	0.859108		11.7006	0.855702		11.7006	0.858501		11.7007	0.855752		11.7006	0.860872		11.7006	0.859936		11.7006	0.862906		11.7006	0.861115		11.7007	0.86119
11.7507	0.835036		11.7506	0.861133		11.7507	0.847116		11.7506	0.860536		11.7506	0.852057		11.7507	0.85819		11.7507	0.853264		11.7506	0.860551		11.7506	0.854206		11.7506	0.86254		11.7507	0.85941		11.7506	0.85956		11.7506	0.85921		11.7506	0.857082		11.7506	0.860612		11.7507	0.860842
11.8007	0.834555		11.8006	0.86247		11.8007	0.846117		11.8006	0.859864		11.8006	0.848905		11.8007	0.856737		11.8007	0.854731		11.8006	0.857625		11.8006	0.857077		11.8006	0.860238		11.8007	0.855558		11.8006	0.859656		11.8007	0.859974		11.8006	0.860035		11.8006	0.859737		11.8007	0.860624
11.8507	0.831813		11.8506	0.860985		11.8507	0.845891		11.8506	0.859773		11.8506	0.84996		11.8507	0.857139		11.8507	0.854171		11.8506	0.860994		11.8506	0.855358		11.8506	0.860859		11.8507	0.858193		11.8507	0.858306		11.8507	0.858461		11.8506	0.860449		11.8506	0.856155		11.8507	0.860622
11.9007	0.835923		11.9006	0.8613		11.9007	0.847155		11.9006	0.860048		11.9006	0.849194		11.9007	0.859056		11.9007	0.855183		11.9006	0.859735		11.9006	0.857071		11.9006	0.860454		11.9007	0.857774		11.9007	0.860116		11.9007	0.856987		11.9006	0.858909		11.9006	0.858757		11.9007	0.86034
11.9507	0.832133		11.9506	0.862965		11.9507	0.843045		11.9506	0.86266		11.9506	0.848954		11.9507	0.858446		11.9507	0.853862		11.9506	0.858204		11.9506	0.856994		11.9506	0.858764		11.9507	0.8556		11.9507	0.861751		11.9507	0.858609		11.9506	0.858888		11.9506	0.85974		11.9507	0.859996
12.0007	0.834739		12.0006	0.859787		12.0007	0.84342		12.0006	0.855612		12.0006	0.849421		12.0007	0.858101		12.0007	0.856076		12.0006	0.856984		12.0006	0.855382		12.0006	0.859906		12.0007	0.854051		12.0007	0.858057		12.0007	0.860623		12.0006	0.859073		12.0006	0.859364		12.0007	0.858884
12.0507	0.833896		12.0507	0.862385		12.0507	0.845629		12.0506	0.860497		12.0506	0.85059		12.0507	0.858249		12.0507	0.853795		12.0506	0.857728		12.0506	0.855875		12.0506	0.858654		12.0507	0.856293		12.0507	0.857875		12.0507	0.859959		12.0506	0.859435		12.0506	0.858618		12.0507	0.860477
12.1007	0.831772		12.1007	0.859351		12.1007	0.846987		12.1006	0.860318		12.1006	0.850649		12.1007	0.859964		12.1007	0.854943		12.1007	0.859218		12.1006	0.855047		12.1006	0.85618		12.1007	0.857781		12.1007	0.858108		12.1007	0.859421		12.1006	0.858121		12.1006	0.858206		12.1007	0.862519
12.1507	0.832129		12.1507	0.861282		12.1507	0.844628		12.1506	0.857356		12.1506	0.8482		12.1507	0.856025		12.1507	0.856123		12.1507	0.859773		12.1506	0.854139		12.1506	0.860065		12.1507	0.855625		12.1507	0.859745		12.1507	0.856531		12.1506	0.858358		12.1506	0.856902		12.1507	0.860092
12.2007	0.83302		12.2007	0.862531		12.2007	0.844932		12.2006	0.856032		12.2006	0.849309		12.2007	0.858604		12.2007	0.85374		12.2007	0.858082		12.2007	0.854843		12.2006	0.862687		12.2007	0.856927		12.2007	0.858016		12.2007	0.857951		12.2006	0.861892		12.2006	0.859266		12.2007	0.858672
12.2507	0.834335		12.2507	0.860562		12.2507	0.846637		12.2506	0.858997		12.2506	0.848808		12.2507	0.858519		12.2507	0.854602		12.2507	0.857652		12.2507	0.853763		12.2506	0.858163		12.2507	0.855867		12.2507	0.858523		12.2507	0.858297		12.2506	0.857721		12.2506	0.85558		12.2507	0.858616
12.3007	0.833246		12.3007	0.857144		12.3007	0.843664		12.3006	0.859617		12.3006	0.849572		12.3007	0.856378		12.3007	0.851276		12.3007	0.85798		12.3007	0.855213		12.3006	0.857646		12.3007	0.854636		12.3007	0.858911		12.3007	0.856896		12.3006	0.860353		12.3006	0.857449		12.3007	0.861084
12.3507	0.834067		12.3507	0.861264		12.3507	0.839756		12.3506	0.859221		12.3506	0.847302		12.3507	0.85804		12.3507	0.851517		12.3507	0.859033		12.3507	0.855173		12.3506	0.855142		12.3507	0.855855		12.3507	0.858026		12.3507	0.856355		12.3506	0.858805		12.3506	0.858095		12.3507	0.857857
12.4007	0.832058		12.4007	0.859956		12.4007	0.841539		12.4007	0.859954		12.4006	0.847327		12.4007	0.855459		12.4007	0.853996		12.4007	0.858456		12.4007	0.855901		12.4006	0.857969		12.4007	0.855883		12.4007	0.862575		12.4007	0.859331		12.4006	0.859536		12.4006	0.853656		12.4007	0.862278
12.4507	0.830648		12.4507	0.858732		12.4507	0.843804		12.4507	0.856385		12.4507	0.848368		12.4507	0.855256		12.4507	0.85494		12.4507	0.857792		12.4507	0.854335		12.4506	0.857085		12.4507	0.855858		12.4507	0.858136		12.4507	0.858753		12.4506	0.859149		12.4506	0.857054		12.4507	0.859776
12.5007	0.829209		12.5007	0.859554		12.5007	0.844328		12.5007	0.85626		12.5007	0.847406		12.5007	0.854426		12.5007	0.852848		12.5007	0.85405		12.5007	0.858776		12.5006	0.856341		12.5007	0.855722		12.5007	0.855992		12.5007	0.857008		12.5007	0.858271		12.5006	0.858864		12.5007	0.859372
12.5507	0.834202		12.5507	0.8587		12.5507	0.843303		12.5507	0.857974		12.5507	0.846702		12.5507	0.857652		12.5507	0.85468		12.5507	0.859176		12.5507	0.85581		12.5506	0.858967		12.5507	0.853406		12.5507	0.856316		12.5507	0.850092		12.5507	0.860637		12.5506	0.857738		12.5507	0.859962
12.6007	0.832259		12.6007	0.860101		12.6007	0.841651		12.6007	0.856877		12.6007	0.848239		12.6007	0.856808		12.6007	0.854284		12.6007	0.855928		12.6007	0.854614		12.6006	0.858483		12.6007	0.85381		12.6007	0.858656		12.6007	0.859789		12.6007	0.857834		12.6007	0.857876		12.6007	0.856976
12.6507	0.831758		12.6507	0.859021		12.6507	0.844505		12.6507	0.858367		12.6507	0.846435		12.6507	0.856341		12.6507	0.854414		12.6507	0.858472		12.6507	0.85196		12.6506	0.857702		12.6507	0.855735		12.6507	0.857361		12.6507	0.857327		12.6507	0.859212		12.6507	0.854418		12.6507	0.857645
12.7007	0.83105		12.7007	0.859215		12.7007	0.843657		12.7007	0.85539		12.7007	0.846341		12.7007	0.857193		12.7007	0.852619		12.7007	0.85663		12.7007	0.854737		12.7006	0.860141		12.7007	0.856399		12.7007	0.858939		12.7007	0.858604		12.7007	0.860266		12.7007	0.857644		12.7007	0.862302
12.7507	0.830557		12.7507	0.859243		12.7507	0.843474		12.7507	0.856643		12.7507	0.846235		12.7507	0.855609		12.7507	0.85416		12.7507	0.858001		12.7507	0.85334		12.7506	0.858808		12.7507	0.85565		12.7507	0.858204		12.7507	0.858703		12.7507	0.857507		12.7507	0.858798		12.7507	0.858365
12.8007	0.83182		12.8007	0.859009		12.8007	0.84349		12.8007	0.858077		12.8007	0.848512		12.8007	0.857364		12.8007	0.855078		12.8007	0.858498		12.8007	0.853549		12.8006	0.857601		12.8007	0.85601		12.8007	0.856699		12.8007	0.856333		12.8007	0.857177		12.8007	0.854304		12.8007	0.859748
12.8507	0.83074		12.8507	0.859539		12.8507	0.842542		12.8507	0.856775		12.8507	0.850523		12.8507	0.857315		12.8507	0.852753		12.8507	0.857867		12.8507	0.856019		12.8506	0.860496		12.8507	0.853471		12.8507	0.859849		12.8507	0.856249		12.8507	0.855513		12.8507	0.854756		12.8507	0.85636
12.9007	0.828856		12.9007	0.860602		12.9007	0.843688		12.9007	0.855457		12.9007	0.847146		12.9007	0.855827		12.9007	0.851194		12.9007	0.857745		12.9007	0.852033		12.9007	0.855122		12.9007	0.852446		12.9007	0.856963		12.9007	0.855983		12.9007	0.857104		12.9007	0.854387		12.9007	0.857084
12.9507	0.833198		12.9507	0.859189		12.9507	0.843348		12.9507	0.855808		12.9507	0.845199		12.9507	0.856318		12.9507	0.849588		12.9507	0.857751		12.9507	0.854116		12.9507	0.859935		12.9508	0.856563		12.9507	0.858693		12.9507	0.854879		12.9507	0.857635		12.9507	0.85631		12.9507	0.859145
13.0007	0.831201		13.0007	0.86016		13.0007	0.843074		13.0007	0.853719		13.0007	0.850184		13.0007	0.856923		13.0007	0.852577		13.0007	0.857777		13.0007	0.855337		13.0007	0.857012		13.0008	0.854481		13.0007	0.857183		13.0007	0.855979		13.0007	0.858026		13.0007	0.856899		13.0007	0.859522
13.0507	0.830078		13.0507	0.860631		13.0507	0.843661		13.0507	0.854213		13.0507	0.847503		13.0507	0.856295		13.0507	0.85079		13.0507	0.859088		13.0507	0.856376		13.0507	0.8577		13.0508	0.857168		13.0507	0.855674		13.0507	0.856333		13.0507	0.857051		13.0507	0.859602		13.0507	0.859018
13.1007	0.830564		13.1007	0.857164		13.1007	0.842623		13.1007	0.856358		13.1007	0.847268		13.1007	0.857217		13.1007	0.854637		13.1007	0.85874		13.1007	0.853073		13.1007	0.856969		13.1008	0.853181		13.1007	0.855599		13.1007	0.855049		13.1007	0.856921		13.1007	0.855918		13.1007	0.858191
13.1508	0.829655		13.1507	0.859526		13.1507	0.843378		13.1507	0.857286		13.1507	0.846082		13.1508	0.854581		13.1507	0.852723		13.1507	0.855021		13.1507	0.852774		13.1507	0.856626		13.1508	0.853831		13.1507	0.855058		13.1507	0.856999		13.1507	0.857541		13.1507	0.858234		13.1507	0.857357
13.2008	0.830188		13.2007	0.857307		13.2007	0.845063		13.2007	0.857167		13.2007	0.845952		13.2008	0.855953		13.2007	0.854246		13.2007	0.857977		13.2007	0.854489		13.2007	0.858496		13.2008	0.852181		13.2007	0.855576		13.2007	0.853994		13.2007	0.855645		13.2007	0.860137		13.2007	0.857194
13.2508	0.830204		13.2507	0.860081		13.2507	0.842928		13.2507	0.855394		13.2507	0.845437		13.2508	0.855681		13.2508	0.850357		13.2507	0.855554		13.2507	0.851196		13.2507	0.860496		13.2508	0.855877		13.2507	0.854953		13.2507	0.853854		13.2507	0.859465		13.2507	0.856373		13.2507	0.857464
13.3008	0.82962		13.3007	0.857641		13.3007	0.840301		13.3007	0.857581		13.3007	0.846226		13.3008	0.857241		13.3008	0.848671		13.3007	0.855705		13.3007	0.853894		13.3007	0.855114		13.3008	0.851736		13.3007	0.857316		13.3007	0.853606		13.3007	0.856103		13.3007	0.855096		13.3008	0.858603
13.3508	0.829106		13.3507	0.855583		13.3507	0.842637		13.3507	0.85944		13.3507	0.847011		13.3508	0.856126		13.3508	0.850795		13.3507	0.858124		13.3507	0.853586		13.3507	0.856922		13.3508	0.8537		13.3507	0.856816		13.3507	0.855801		13.3507	0.855004		13.3507	0.854782		13.3508	0.85724
13.4008	0.830949		13.4007	0.859075		13.4007	0.841946		13.4007	0.856809		13.4007	0.846628		13.4008	0.854657		13.4008	0.853556		13.4007	0.855699		13.4007	0.851846		13.4007	0.855879		13.4008	0.854003		13.4007	0.859031		13.4007	0.855462		13.4007	0.856432		13.4007	0.854087		13.4008	0.855098
13.4508	0.82878		13.4507	0.859678		13.4507	0.84198		13.4507	0.854536		13.4507	0.844674		13.4508	0.852726		13.4508	0.851923		13.4507	0.854052		13.4507	0.852408		13.4507	0.85542		13.4508	0.853419		13.4507	0.854741		13.4507	0.854102		13.4507	0.856827		13.4507	0.854803		13.4508	0.858169
13.5008	0.832234		13.5007	0.859369		13.5008	0.84204		13.5007	0.853554		13.5007	0.845161		13.5008	0.856205		13.5008	0.848768		13.5007	0.857617		13.5007	0.853461		13.5007	0.85571		13.5008	0.854036		13.5007	0.856303		13.5007	0.856116		13.5007	0.858678		13.5007	0.856149		13.5008	0.858044
13.5508	0.830922		13.5507	0.857903		13.5508	0.842284		13.5507	0.855492		13.5507	0.845367		13.5508	0.855594		13.5508	0.852622		13.5507	0.856329		13.5507	0.852092		13.5507	0.858918		13.5508	0.853138		13.5507	0.85688		13.5507	0.855119		13.5507	0.857349		13.5507	0.855083		13.5508	0.858135
13.6008	0.832017		13.6007	0.855957		13.6008	0.841281		13.6007	0.85384		13.6007	0.843835		13.6008	0.857054		13.6008	0.850342		13.6007	0.857428		13.6007	0.853725		13.6007	0.853739		13.6008	0.853526		13.6007	0.856756		13.6008	0.854575		13.6007	0.8568		13.6007	0.853426		13.6008	0.857746
13.6508	0.829059		13.6507	0.860188		13.6508	0.841441		13.6507	0.853396		13.6507	0.846509		13.6508	0.855278		13.6508	0.849528		13.6507	0.857502		13.6507	0.851335		13.6507	0.85692		13.6508	0.85368		13.6508	0.857657		13.6508	0.853647		13.6507	0.857737		13.6507	0.852448		13.6508	0.856199
13.7008	0.827119		13.7007	0.859878		13.7008	0.841994		13.7007	0.854796		13.7007	0.845459		13.7008	0.855794		13.7008	0.85194		13.7007	0.857521		13.7007	0.854591		13.7007	0.858966		13.7008	0.853389		13.7008	0.858765		13.7008	0.85414		13.7007	0.85727		13.7007	0.855898		13.7008	0.856399
13.7508	0.830757		13.7507	0.85789		13.7508	0.841513		13.7507	0.85511		13.7507	0.845404		13.7508	0.854779		13.7508	0.849842		13.7507	0.855466		13.7507	0.852223		13.7507	0.854679		13.7508	0.855274		13.7508	0.857798		13.7508	0.854282		13.7507	0.857626		13.7507	0.851379		13.7508	0.858226
13.8008	0.826447		13.8007	0.857058		13.8008	0.841355		13.8007	0.852982		13.8007	0.845275		13.8008	0.857067		13.8008	0.851992		13.8007	0.855983		13.8007	0.85293		13.8007	0.856969		13.8008	0.851295		13.8008	0.853209		13.8008	0.856187		13.8007	0.856916		13.8007	0.854836		13.8008	0.858031
13.8508	0.831699		13.8508	0.85738		13.8508	0.841622		13.8507	0.85337		13.8507	0.844388		13.8508	0.855109		13.8508	0.849611		13.8507	0.854324		13.8507	0.851682		13.8507	0.85454		13.8508	0.851986		13.8508	0.856427		13.8508	0.85567		13.8507	0.85548		13.8507	0.853778		13.8508	0.855976
13.9008	0.82854		13.9008	0.858083		13.9008	0.841602		13.9007	0.854054		13.9007	0.842899		13.9008	0.859039		13.9008	0.850858		13.9008	0.855312		13.9007	0.851802		13.9007	0.8558		13.9008	0.851145		13.9008	0.857014		13.9008	0.852701		13.9007	0.857246		13.9007	0.855067		13.9008	0.855371
13.9508	0.830562		13.9508	0.856891		13.9508	0.841722		13.9507	0.855506		13.9507	0.846187		13.9508	0.854626		13.9508	0.850216		13.9508	0.855022		13.9507	0.855012		13.9507	0.856693		13.9508	0.852649		13.9508	0.858003		13.9508	0.851354		13.9507	0.854495		13.9507	0.851997		13.9508	0.858556
14.0008	0.828286		14.0008	0.859002		14.0008	0.839444		14.0007	0.854568		14.0007	0.843755		14.0008	0.85331		14.0008	0.851168		14.0008	0.854985		14.0008	0.850839		14.0007	0.856475		14.0008	0.852603		14.0008	0.857871		14.0008	0.852738		14.0007	0.856111		14.0007	0.854723		14.0008	0.856134
14.0508	0.828409		14.0508	0.8566		14.0508	0.844317		14.0507	0.85308		14.0507	0.845591		14.0508	0.851771		14.0508	0.849559		14.0508	0.855305		14.0508	0.85264		14.0507	0.85464		14.0508	0.851906		14.0508	0.856887		14.0508	0.854017		14.0507	0.855869		14.0507	0.854077		14.0508	0.860738
14.1008	0.830128		14.1008	0.856484		14.1008	0.842313		14.1007	0.853743		14.1007	0.845792		14.1008	0.855158		14.1008	0.85028		14.1008	0.854057		14.1008	0.851237		14.1007	0.855612		14.1008	0.852109		14.1008	0.855234		14.1008	0.851212		14.1007	0.85524		14.1007	0.855457		14.1008	0.856297
14.1508	0.830748		14.1508	0.855618		14.1508	0.837678		14.1507	0.854471		14.1507	0.845108		14.1508	0.85581		14.1508	0.848451		14.1508	0.855362		14.1508	0.852731		14.1507	0.856178		14.1508	0.851246		14.1508	0.854802		14.1508	0.857249		14.1507	0.853759		14.1507	0.853828		14.1508	0.857683
14.2008	0.827627		14.2008	0.858487		14.2008	0.838918		14.2008	0.852785		14.2007	0.842578		14.2008	0.85476		14.2008	0.85034		14.2008	0.853283		14.2008	0.85107		14.2007	0.855125		14.2008	0.854654		14.2008	0.854162		14.2008	0.853003		14.2007	0.854354		14.2007	0.855089		14.2008	0.854971
14.2508	0.825465		14.2508	0.85879		14.2508	0.838171		14.2508	0.855124		14.2507	0.845957		14.2508	0.854552		14.2508	0.849586		14.2508	0.854994		14.2508	0.852843		14.2507	0.851899		14.2508	0.8519		14.2508	0.855278		14.2508	0.855332		14.2507	0.854675		14.2507	0.85044		14.2508	0.856711
14.3008	0.827912		14.3008	0.856564		14.3008	0.840479		14.3008	0.854491		14.3008	0.843384		14.3008	0.853488		14.3008	0.850706		14.3008	0.853682		14.3008	0.852012		14.3007	0.856914		14.3008	0.850899		14.3008	0.855405		14.3008	0.853984		14.3008	0.853494		14.3007	0.854486		14.3008	0.856333
14.3508	0.827448		14.3508	0.85546		14.3508	0.841385		14.3508	0.854892		14.3508	0.843285		14.3508	0.855958		14.3508	0.850154		14.3508	0.852904		14.3508	0.851385		14.3507	0.854171		14.3508	0.852229		14.3508	0.854632		14.3508	0.856195		14.3508	0.854692		14.3507	0.853788		14.3508	0.854488
14.4008	0.829131		14.4008	0.856398		14.4008	0.840489		14.4008	0.855922		14.4008	0.845249		14.4008	0.852967		14.4008	0.849295		14.4008	0.856886		14.4008	0.852179		14.4007	0.852795		14.4008	0.850661		14.4008	0.856112		14.4008	0.854517		14.4008	0.855821		14.4008	0.855691		14.4008	0.857491
14.4508	0.827329		14.4508	0.858962		14.4508	0.840175		14.4508	0.851784		14.4508	0.845442		14.4508	0.85178		14.4508	0.84834		14.4508	0.858738		14.4508	0.851429		14.4507	0.854805		14.4508	0.853499		14.4508	0.85642		14.4508	0.853315		14.4508	0.855119		14.4508	0.856891		14.4508	0.858547
14.5008	0.827904		14.5008	0.855899		14.5008	0.839707		14.5008	0.852525		14.5008	0.842519		14.5008	0.854973		14.5008	0.849835		14.5008	0.85398		14.5008	0.851934		14.5007	0.853777		14.5008	0.850618		14.5008	0.853446		14.5008	0.851201		14.5008	0.853751		14.5008	0.853817		14.5008	0.856418
14.5508	0.82832		14.5508	0.85365		14.5508	0.839144		14.5508	0.854459		14.5508	0.842826		14.5508	0.851864		14.5508	0.849654		14.5508	0.853891		14.5508	0.850007		14.5507	0.853824		14.5508	0.851754		14.5508	0.856599		14.5508	0.851134		14.5508	0.855169		14.5508	0.852611		14.5508	0.854811
14.6008	0.829612		14.6008	0.855727		14.6008	0.838355		14.6008	0.854324		14.6008	0.844392		14.6008	0.852178		14.6008	0.84891		14.6008	0.856681		14.6008	0.851769		14.6007	0.851948		14.6008	0.851621		14.6008	0.856387		14.6008	0.853271		14.6008	0.858127		14.6008	0.853763		14.6008	0.854739
14.6508	0.828569		14.6508	0.856515		14.6508	0.840918		14.6508	0.853443		14.6508	0.842019		14.6508	0.852214		14.6508	0.852048		14.6508	0.855409		14.6508	0.851515		14.6507	0.854279		14.6508	0.850581		14.6508	0.853025		14.6508	0.852961		14.6508	0.856684		14.6508	0.851026		14.6508	0.855928
14.7008	0.827364		14.7008	0.855638		14.7008	0.839946		14.7008	0.852063		14.7008	0.843033		14.7008	0.854013		14.7008	0.849267		14.7008	0.854487		14.7008	0.850248		14.7008	0.854719		14.7008	0.853668		14.7008	0.855296		14.7008	0.851503		14.7008	0.852998		14.7008	0.855663		14.7008	0.857178
14.7508	0.826118		14.7508	0.858019		14.7508	0.840817		14.7508	0.854708		14.7508	0.844382		14.7508	0.853297		14.7508	0.849083		14.7508	0.852711		14.7508	0.850835		14.7508	0.855757		14.7508	0.850059		14.7508	0.849971		14.7508	0.850746		14.7508	0.854023		14.7508	0.850113		14.7508	0.857054
14.8008	0.826229		14.8008	0.855148		14.8008	0.839607		14.8008	0.852445		14.8008	0.844758		14.8008	0.852604		14.8008	0.848242		14.8008	0.853199		14.8008	0.850499		14.8008	0.8546		14.8009	0.8531		14.8008	0.853608		14.8008	0.851413		14.8008	0.855415		14.8008	0.85415		14.8008	0.855373
14.8508	0.828663		14.8508	0.856672		14.8508	0.841166		14.8508	0.852463		14.8508	0.844277		14.8508	0.851866		14.8508	0.848021		14.8508	0.852789		14.8508	0.850604		14.8508	0.8556		14.8509	0.850638		14.8508	0.854095		14.8508	0.852862		14.8508	0.853629		14.8508	0.853447		14.8508	0.855759
14.9008	0.824768		14.9008	0.852695		14.9008	0.840254		14.9008	0.85317		14.9008	0.845038		14.9008	0.854897		14.9008	0.849581		14.9008	0.854424		14.9008	0.849272		14.9008	0.854443		14.9009	0.852604		14.9008	0.851384		14.9008	0.853351		14.9008	0.851116		14.9008	0.853067		14.9008	0.855706
14.9508	0.825141		14.9508	0.855354		14.9508	0.839926		14.9508	0.849498		14.9508	0.8472		14.9509	0.852527		14.9508	0.851959		14.9508	0.854977		14.9508	0.851223		14.9508	0.853724		14.9509	0.852148		14.9508	0.85373		14.9508	0.851972		14.9508	0.853786		14.9508	0.851886		14.9508	0.857285
15.0009	0.826775		15.0008	0.854789		15.0008	0.839588		15.0008	0.854991		15.0008	0.842585		15.0009	0.850464		15.0008	0.849673		15.0008	0.85409		15.0008	0.849732		15.0008	0.853602		15.0009	0.851532		15.0008	0.852839		15.0008	0.855085		15.0008	0.850663		15.0008	0.853702		15.0008	0.854617
15.0509	0.827265		15.0508	0.855151		15.0508	0.837397		15.0508	0.851505		15.0508	0.843399		15.0509	0.854751		15.0509	0.848219		15.0508	0.856529		15.0508	0.851077		15.0508	0.851669		15.0509	0.850931		15.0508	0.853751		15.0508	0.853079		15.0508	0.854647		15.0508	0.851735		15.0508	0.853219
15.1009	0.828826		15.1008	0.856018		15.1008	0.838478		15.1008	0.852683		15.1008	0.844442		15.1009	0.85277		15.1009	0.846247		15.1008	0.85137		15.1008	0.848682		15.1008	0.852145		15.1009	0.851397		15.1008	0.852296		15.1008	0.851494		15.1008	0.854168		15.1008	0.852547		15.1009	0.854581
15.1509	0.82684		15.1508	0.85534		15.1508	0.838175		15.1508	0.851805		15.1508	0.842708		15.1509	0.854374		15.1509	0.847959		15.1508	0.852315		15.1508	0.849473		15.1508	0.857099		15.1509	0.852112		15.1508	0.854951		15.1508	0.853654		15.1508	0.852689		15.1508	0.85466		15.1509	0.853746
15.2009	0.82748		15.2008	0.854461		15.2008	0.83901		15.2008	0.850791		15.2008	0.842522		15.2009	0.850979		15.2009	0.85128		15.2008	0.853933		15.2008	0.851614		15.2008	0.852559		15.2009	0.851019		15.2008	0.853005		15.2008	0.852882		15.2008	0.856008		15.2008	0.852307		15.2009	0.853298
15.2509	0.827932		15.2508	0.853781		15.2508	0.839675		15.2508	0.85451		15.2508	0.840435		15.2509	0.855006		15.2509	0.847654		15.2508	0.853299		15.2508	0.851443		15.2508	0.855859		15.2509	0.849882		15.2508	0.854402		15.2508	0.853725		15.2508	0.85125		15.2508	0.852314		15.2509	0.856029
15.3009	0.828556		15.3008	0.856463		15.3009	0.83993		15.3008	0.850406		15.3008	0.841976		15.3009	0.852554		15.3009	0.848003		15.3008	0.853942		15.3008	0.851318		15.3008	0.853199		15.3009	0.851125		15.3008	0.856466		15.3008	0.851348		15.3008	0.85317		15.3008	0.851981		15.3009	0.851776
15.3509	0.824587		15.3508	0.855878		15.3509	0.839062		15.3508	0.852665		15.3508	0.842245		15.3509	0.853947		15.3509	0.847834		15.3508	0.85347		15.3508	0.847301		15.3508	0.854783		15.3509	0.849854		15.3508	0.854236		15.3508	0.852175		15.3508	0.853417		15.3508	0.853824		15.3509	0.855522
15.4009	0.823806		15.4008	0.855786		15.4009	0.840137		15.4008	0.851336		15.4008	0.843653		15.4009	0.85347		15.4009	0.849457		15.4008	0.852806		15.4008	0.848859		15.4008	0.85288		15.4009	0.850406		15.4008	0.85485		15.4008	0.85136		15.4008	0.853768		15.4008	0.852373		15.4009	0.855022
15.4509	0.827237		15.4508	0.855725		15.4509	0.837975		15.4508	0.849198		15.4508	0.83872		15.4509	0.853784		15.4509	0.848281		15.4508	0.855338		15.4508	0.848975		15.4508	0.855024		15.4509	0.845418		15.4508	0.854428		15.4509	0.852947		15.4508	0.853069		15.4508	0.851077		15.4509	0.854193
15.5009	0.82815		15.5008	0.857703		15.5009	0.839665		15.5008	0.852002		15.5008	0.843792		15.5009	0.855681		15.5009	0.849603		15.5008	0.855126		15.5008	0.850453		15.5008	0.85465		15.5009	0.849483		15.5009	0.853731		15.5009	0.850692		15.5008	0.853991		15.5008	0.85394		15.5009	0.855948
15.5509	0.827907		15.5508	0.853184		15.5509	0.837737		15.5508	0.849256		15.5508	0.842643		15.5509	0.849605		15.5509	0.848091		15.5508	0.850712		15.5508	0.849941		15.5508	0.853927		15.5509	0.852985		15.5509	0.851318		15.5509	0.850808		15.5508	0.852612		15.5508	0.853738		15.5509	0.853695
15.6009	0.826209		15.6008	0.855981		15.6009	0.83908		15.6008	0.855554		15.6008	0.84173		15.6009	0.850553		15.6009	0.847723		15.6008	0.851838		15.6008	0.849431		15.6008	0.856534		15.6009	0.848975		15.6009	0.851842		15.6009	0.849715		15.6008	0.858807		15.6008	0.85317		15.6009	0.855325
15.6509	0.826469		15.6508	0.854624		15.6509	0.838621		15.6508	0.849649		15.6508	0.843849		15.6509	0.851266		15.6509	0.84666		15.6508	0.853743		15.6508	0.851058		15.6508	0.853306		15.6509	0.849787		15.6509	0.852582		15.6509	0.853986		15.6508	0.853353		15.6508	0.850166		15.6509	0.855389
15.7009	0.82385		15.7009	0.857327		15.7009	0.838147		15.7008	0.851616		15.7008	0.841734		15.7009	0.854649		15.7009	0.847704		15.7008	0.851719		15.7008	0.847167		15.7008	0.85216		15.7009	0.85174		15.7009	0.852747		15.7009	0.850657		15.7008	0.853365		15.7008	0.851127		15.7009	0.855848
15.7509	0.826737		15.7509	0.857848		15.7509	0.836224		15.7508	0.852431		15.7508	0.843804		15.7509	0.850199		15.7509	0.846305		15.7509	0.852746		15.7508	0.849154		15.7508	0.853959		15.7509	0.850923		15.7509	0.852494		15.7509	0.851015		15.7508	0.853788		15.7508	0.8519		15.7509	0.854409
15.8009	0.824814		15.8009	0.852486		15.8009	0.837994		15.8008	0.85176		15.8008	0.840536		15.8009	0.852216		15.8009	0.847097		15.8009	0.852692		15.8008	0.851345		15.8008	0.853718		15.8009	0.850706		15.8009	0.851131		15.8009	0.852204		15.8008	0.852409		15.8008	0.851366		15.8009	0.854076
15.8509	0.82526		15.8509	0.854703		15.8509	0.839147		15.8508	0.852364		15.8508	0.841956		15.8509	0.853565		15.8509	0.847813		15.8509	0.854275		15.8509	0.849112		15.8508	0.852739		15.8509	0.849571		15.8509	0.854499		15.8509	0.851751		15.8508	0.851538		15.8508	0.850738		15.8509	0.853138
15.9009	0.827603		15.9009	0.85662		15.9009	0.837749		15.9008	0.853749		15.9008	0.842169		15.9009	0.854236		15.9009	0.849308		15.9009	0.853149		15.9009	0.848377		15.9008	0.853673		15.9009	0.853299		15.9009	0.853311		15.9009	0.849773		15.9008	0.855165		15.9008	0.853065		15.9009	0.85326
15.9509	0.826434		15.9509	0.855327		15.9509	0.837001		15.9508	0.85081		15.9508	0.838393		15.9509	0.853357		15.9509	0.847825		15.9509	0.852398		15.9509	0.852973		15.9508	0.853182		15.9509	0.847377		15.9509	0.848351		15.9509	0.849285		15.9508	0.85239		15.9508	0.851291		15.9509	0.856056
16.0009	0.826747		16.0009	0.855945		16.0009	0.835972		16.0009	0.851976		16.0008	0.842588		16.0009	0.852486		16.0009	0.847922		16.0009	0.852524		16.0009	0.849562		16.0008	0.85291		16.0009	0.851788		16.0009	0.850737		16.0009	0.853814		16.0008	0.851191		16.0008	0.852499		16.0009	0.852471
16.0509	0.827077		16.0509	0.851821		16.0509	0.835515		16.0509	0.852893		16.0508	0.839802		16.0509	0.854086		16.0509	0.848998		16.0509	0.853594		16.0509	0.848856		16.0508	0.854291		16.0509	0.850525		16.0509	0.852831		16.0509	0.848769		16.0508	0.854441		16.0508	0.852019		16.0509	0.851726
16.1009	0.82591		16.1009	0.85607		16.1009	0.838886		16.1009	0.851653		16.1009	0.840589		16.1009	0.855417		16.1009	0.847099		16.1009	0.853456		16.1009	0.849319		16.1008	0.854746		16.1009	0.848321		16.1009	0.852729		16.1009	0.851394		16.1008	0.85412		16.1008	0.85145		16.1009	0.855213
16.1509	0.823048		16.1509	0.855554		16.1509	0.837279		16.1509	0.850441		16.1509	0.842167		16.1509	0.850443		16.1509	0.847835		16.1509	0.852377		16.1509	0.847194		16.1508	0.853355		16.1509	0.849419		16.1509	0.853641		16.1509	0.851838		16.1509	0.854287		16.1508	0.849934		16.1509	0.852532
16.2009	0.827524		16.2009	0.853166		16.2009	0.837612		16.2009	0.853456		16.2009	0.842838		16.2009	0.854008		16.2009	0.84634		16.2009	0.854449		16.2009	0.845922		16.2008	0.854133		16.2009	0.846377		16.2009	0.853867		16.2009	0.85164		16.2009	0.851181		16.2008	0.851731		16.2009	0.852129
16.2509	0.823287		16.2509	0.852667		16.2509	0.840791		16.2509	0.850106		16.2509	0.842971		16.2509	0.851578		16.2509	0.844765		16.2509	0.851661		16.2509	0.8488		16.2508	0.850337		16.2509	0.852183		16.2509	0.854353		16.2509	0.850869		16.2509	0.849533		16.2509	0.851948		16.2509	0.854063
16.3009	0.824075		16.3009	0.852765		16.3009	0.839396		16.3009	0.849857		16.3009	0.842522		16.3009	0.851024		16.3009	0.846581		16.3009	0.849287		16.3009	0.847866		16.3008	0.851395		16.3009	0.850859		16.3009	0.854531		16.3009	0.850809		16.3009	0.852823		16.3009	0.847852		16.3009	0.854247
16.3509	0.826254		16.3509	0.854713		16.3509	0.83499		16.3509	0.850336		16.3509	0.840723		16.3509	0.84957		16.3509	0.846454		16.3509	0.851761		16.3509	0.846272		16.3508	0.85255		16.3509	0.850937		16.3509	0.851175		16.3509	0.851628		16.3509	0.852439		16.3509	0.848952		16.3509	0.851578
16.4009	0.828429		16.4009	0.851427		16.4009	0.837212		16.4009	0.853272		16.4009	0.84187		16.4009	0.851024		16.4009	0.846452		16.4009	0.850481		16.4009	0.846552		16.4008	0.850997		16.4009	0.84812		16.4009	0.853798		16.4009	0.852729		16.4009	0.852921		16.4009	0.850601		16.4009	0.852524
16.4509	0.823671		16.4509	0.854232		16.4509	0.837954		16.4509	0.850315		16.4509	0.83921		16.4509	0.851214		16.4509	0.847004		16.4509	0.852261		16.4509	0.847948		16.4508	0.852528		16.4509	0.848528		16.4509	0.851063		16.4509	0.849811		16.4509	0.852761		16.4509	0.850494		16.4509	0.854432
16.5009	0.825134		16.5009	0.854403		16.5009	0.838926		16.5009	0.849348		16.5009	0.840252		16.5009	0.851411		16.5009	0.845907		16.5009	0.8508		16.5009	0.849874		16.5008	0.853435		16.5009	0.849752		16.5009	0.853214		16.5009	0.848572		16.5009	0.850971		16.5009	0.85059		16.5009	0.851675
16.5509	0.824215		16.5509	0.852602		16.5509	0.837901		16.5509	0.851542		16.5509	0.841437		16.5509	0.850803		16.5509	0.84775		16.5509	0.851743		16.5509	0.848787		16.5509	0.850727		16.5509	0.84489		16.5509	0.84889		16.5509	0.851042		16.5509	0.850814		16.5509	0.850718		16.5509	0.853192
16.6009	0.824081		16.6009	0.855966		16.6009	0.838434		16.6009	0.85058		16.6009	0.841029		16.6009	0.849928		16.6009	0.845456		16.6009	0.851543		16.6009	0.846197		16.6009	0.851646		16.601	0.847551		16.6009	0.851617		16.6009	0.848123		16.6009	0.851144		16.6009	0.84893		16.6009	0.85514
16.6509	0.825058		16.6509	0.854051		16.6509	0.835721		16.6509	0.850243		16.6509	0.843026		16.6509	0.85135		16.6509	0.844962		16.6509	0.853646		16.6509	0.847075		16.6509	0.850236		16.651	0.850869		16.6509	0.852774		16.6509	0.851009		16.6509	0.8525		16.6509	0.84985		16.6509	0.853036
16.7009	0.823951		16.7009	0.854254		16.7009	0.836684		16.7009	0.852605		16.7009	0.841173		16.7009	0.852098		16.7009	0.843833		16.7009	0.854398		16.7009	0.846852		16.7009	0.852681		16.701	0.847862		16.7009	0.854092		16.7009	0.851285		16.7009	0.85341		16.7009	0.851769		16.7009	0.852051
16.7509	0.822492		16.7509	0.856208		16.7509	0.834501		16.7509	0.851934		16.7509	0.843126		16.7509	0.852496		16.7509	0.844878		16.7509	0.85249		16.7509	0.849136		16.7509	0.85293		16.751	0.847521		16.7509	0.85252		16.7509	0.852677		16.7509	0.85387		16.7509	0.849137		16.7509	0.854608
16.801	0.826106		16.8009	0.856126		16.8009	0.838312		16.8009	0.853627		16.8009	0.842302		16.801	0.850363		16.8009	0.847025		16.8009	0.853975		16.8009	0.846913		16.8009	0.851578		16.801	0.847607		16.8009	0.852219		16.8009	0.849973		16.8009	0.85306		16.8009	0.849522		16.8009	0.852862
16.851	0.825913		16.8509	0.852159		16.8509	0.837884		16.8509	0.850572		16.8509	0.840663		16.851	0.84739		16.8509	0.847829		16.8509	0.85073		16.8509	0.847996		16.8509	0.852371		16.851	0.847748		16.8509	0.849599		16.8509	0.85271		16.8509	0.853404		16.8509	0.852944		16.8509	0.854358
16.901	0.821136		16.9009	0.851205		16.9009	0.83572		16.9009	0.847977		16.9009	0.839972		16.901	0.851213		16.901	0.845612		16.9009	0.851324		16.9009	0.847831		16.9009	0.852266		16.901	0.85012		16.9009	0.851395		16.9009	0.849254		16.9009	0.852751		16.9009	0.852266		16.9009	0.852565
16.951	0.824885		16.9509	0.85476		16.9509	0.837595		16.9509	0.850114		16.9509	0.84143		16.951	0.849071		16.951	0.845072		16.9509	0.851919		16.9509	0.847776		16.9509	0.85085		16.951	0.850572		16.9509	0.849895		16.9509	0.851176		16.9509	0.852704		16.9509	0.852861		16.951	0.851051
17.001	0.821268		17.0009	0.85107		17.0009	0.836156		17.0009	0.849482		17.0009	0.840527		17.001	0.847678		17.001	0.846844		17.0009	0.849807		17.0009	0.847938		17.0009	0.851981		17.001	0.847234		17.0009	0.849534		17.0009	0.850389		17.0009	0.850749		17.0009	0.851435		17.001	0.853362
17.051	0.823913		17.0509	0.855502		17.0509	0.835937		17.0509	0.848502		17.0509	0.840174		17.051	0.85223		17.051	0.845496		17.0509	0.848502		17.0509	0.846924		17.0509	0.850157		17.051	0.845275		17.0509	0.852547		17.0509	0.85012		17.0509	0.850464		17.0509	0.849357		17.051	0.853868
17.101	0.824536		17.1009	0.854056		17.1009	0.837308		17.1009	0.850092		17.1009	0.841637		17.101	0.85264		17.101	0.846092		17.1009	0.851756		17.1009	0.847428		17.1009	0.853812		17.101	0.847848		17.1009	0.851853		17.1009	0.849589		17.1009	0.848678		17.1009	0.850024		17.101	0.852463
17.151	0.82302		17.1509	0.853097		17.151	0.836693		17.1509	0.849843		17.1509	0.839175		17.151	0.85018		17.151	0.84555		17.1509	0.85057		17.1509	0.849421		17.1509	0.850787		17.151	0.849385		17.1509	0.850786		17.1509	0.849436		17.1509	0.85339		17.1509	0.849393		17.151	0.854551
17.201	0.82564		17.2009	0.853515		17.201	0.835924		17.2009	0.849967		17.2009	0.840037		17.201	0.853579		17.201	0.845257		17.2009	0.852275		17.2009	0.846314		17.2009	0.851774		17.201	0.848368		17.2009	0.850761		17.2009	0.847699		17.2009	0.85085		17.2009	0.8506		17.201	0.85231
17.251	0.822656		17.2509	0.855587		17.251	0.835806		17.2509	0.85047		17.2509	0.841024		17.251	0.851163		17.251	0.847111		17.2509	0.848377		17.2509	0.846732		17.2509	0.850139		17.251	0.849065		17.2509	0.851642		17.251	0.84865		17.2509	0.851491		17.2509	0.851177		17.251	0.849502
17.301	0.824784		17.3009	0.851915		17.301	0.836934		17.3009	0.84971		17.3009	0.840367		17.301	0.851433		17.301	0.846466		17.3009	0.854492		17.3009	0.846102		17.3009	0.853398		17.301	0.849383		17.301	0.851414		17.301	0.850022		17.3009	0.850815		17.3009	0.849879		17.301	0.854593
17.351	0.821674		17.3509	0.851631		17.351	0.836625		17.3509	0.84808		17.3509	0.840881		17.351	0.852302		17.351	0.846157		17.3509	0.850883		17.3509	0.845299		17.3509	0.851425		17.351	0.847219		17.351	0.848064		17.351	0.849356		17.3509	0.848862		17.3509	0.851919		17.351	0.852045
17.401	0.82155		17.4009	0.855361		17.401	0.835689		17.4009	0.850139		17.4009	0.841475		17.401	0.848213		17.401	0.845375		17.4009	0.852299		17.4009	0.845636		17.4009	0.854331		17.401	0.847666		17.401	0.85056		17.401	0.850012		17.4009	0.852534		17.4009	0.849678		17.401	0.850523
17.451	0.823508		17.4509	0.851797		17.451	0.83599		17.4509	0.85126		17.4509	0.839269		17.451	0.851923		17.451	0.84514		17.4509	0.848882		17.4509	0.846743		17.4509	0.852311		17.451	0.849491		17.451	0.850614		17.451	0.849263		17.4509	0.852523		17.4509	0.850688		17.451	0.853342
17.501	0.821201		17.501	0.851607		17.501	0.83737		17.5009	0.847993		17.5009	0.841728		17.501	0.848055		17.501	0.845589		17.5009	0.852009		17.5009	0.848466		17.5009	0.851862		17.501	0.847428		17.501	0.849494		17.501	0.850586		17.5009	0.849859		17.5009	0.851634		17.501	0.853399
17.551	0.822976		17.551	0.850554		17.551	0.83551		17.5509	0.848217		17.5509	0.841062		17.551	0.847923		17.551	0.84809		17.551	0.851568		17.5509	0.849206		17.5509	0.853691		17.551	0.847972		17.551	0.853597		17.551	0.847185		17.5509	0.851996		17.5509	0.849496		17.551	0.852909
17.601	0.823496		17.601	0.852183		17.601	0.834283		17.6009	0.851116		17.6009	0.840772		17.601	0.848722		17.601	0.846036		17.601	0.854383		17.6009	0.845056		17.6009	0.850818		17.601	0.849853		17.601	0.850149		17.601	0.848141		17.6009	0.853613		17.6009	0.850218		17.601	0.849297
17.651	0.827179		17.651	0.850346		17.651	0.836139		17.6509	0.851396		17.6509	0.841593		17.651	0.85065		17.651	0.846497		17.651	0.853851		17.651	0.847951		17.6509	0.852664		17.651	0.849772		17.651	0.851651		17.651	0.847709		17.6509	0.853369		17.6509	0.847978		17.651	0.851719
17.701	0.823791		17.701	0.850019		17.701	0.836963		17.7009	0.848418		17.7009	0.840795		17.701	0.848793		17.701	0.844922		17.701	0.851945		17.701	0.84727		17.7009	0.851308		17.701	0.846699		17.701	0.849552		17.701	0.846961		17.7009	0.848398		17.7009	0.850422		17.701	0.852997
17.751	0.824808		17.751	0.850557		17.751	0.837695		17.7509	0.849729		17.7509	0.837996		17.751	0.848898		17.751	0.845653		17.751	0.851307		17.751	0.847188		17.7509	0.85307		17.751	0.847518		17.751	0.851476		17.751	0.848078		17.7509	0.852976		17.7509	0.848968		17.751	0.8538
17.801	0.822262		17.801	0.851744		17.801	0.836196		17.8009	0.848059		17.8009	0.838959		17.801	0.84815		17.801	0.844201		17.801	0.851119		17.801	0.845616		17.8009	0.84572		17.801	0.849575		17.801	0.852809		17.801	0.849353		17.8009	0.852307		17.8009	0.850711		17.801	0.853038
17.851	0.82403		17.851	0.85248		17.851	0.832758		17.851	0.846211		17.8509	0.839951		17.851	0.85076		17.851	0.84561		17.851	0.853803		17.851	0.847198		17.8509	0.852834		17.851	0.848628		17.851	0.850632		17.851	0.847165		17.8509	0.854209		17.8509	0.847673		17.851	0.85274
17.901	0.824104		17.901	0.853345		17.901	0.835125		17.901	0.851699		17.901	0.839416		17.901	0.850477		17.901	0.844875		17.901	0.851608		17.901	0.846771		17.9009	0.849571		17.901	0.847578		17.901	0.852546		17.901	0.847466		17.9009	0.850973		17.9009	0.849769		17.901	0.849615
17.951	0.823313		17.951	0.855218		17.951	0.836104		17.951	0.84763		17.951	0.84069		17.951	0.845068		17.951	0.843996		17.951	0.849992		17.951	0.849123		17.9509	0.849146		17.951	0.846363		17.951	0.849802		17.951	0.849713		17.951	0.849826		17.9509	0.850401		17.951	0.853784
18.001	0.822448		18.001	0.856498		18.001	0.835435		18.001	0.845336		18.001	0.838914		18.001	0.849852		18.001	0.846999		18.001	0.848878		18.001	0.845665		18.0009	0.849956		18.001	0.847017		18.001	0.849412		18.001	0.850517		18.001	0.852047		18.0009	0.848688		18.001	0.850372
18.051	0.821891		18.051	0.851754		18.051	0.83471		18.051	0.849108		18.051	0.839156		18.051	0.84778		18.051	0.844238		18.051	0.850333		18.051	0.845471		18.0509	0.85158		18.051	0.848265		18.051	0.848938		18.051	0.849705		18.051	0.84974		18.051	0.846819		18.051	0.851839
18.101	0.823315		18.101	0.849643		18.101	0.835525		18.101	0.849551		18.101	0.838106		18.101	0.848776		18.101	0.845741		18.101	0.851943		18.101	0.843974		18.1009	0.849063		18.101	0.848631		18.101	0.851104		18.101	0.849606		18.101	0.851286		18.101	0.848539		18.101	0.852809
18.151	0.823352		18.151	0.852981		18.151	0.8359		18.151	0.847184		18.151	0.839842		18.151	0.850269		18.151	0.846558		18.151	0.848965		18.151	0.845003		18.1509	0.849091		18.151	0.849333		18.151	0.850165		18.151	0.848515		18.151	0.849752		18.151	0.852138		18.151	0.852685
18.201	0.820134		18.201	0.853552		18.201	0.837011		18.201	0.849108		18.201	0.837028		18.201	0.84772		18.201	0.846365		18.201	0.847605		18.201	0.845154		18.2009	0.849146		18.201	0.847969		18.201	0.852275		18.201	0.846425		18.201	0.852783		18.201	0.848163		18.201	0.853601
18.251	0.822101		18.251	0.851737		18.251	0.836852		18.251	0.853281		18.251	0.839153		18.251	0.847344		18.251	0.845416		18.251	0.849557		18.251	0.84696		18.2509	0.848989		18.251	0.847245		18.251	0.850411		18.251	0.850629		18.251	0.848746		18.251	0.847633		18.251	0.851082
18.301	0.822727		18.301	0.852419		18.301	0.835042		18.301	0.85129		18.301	0.838878		18.301	0.849988		18.301	0.846243		18.301	0.850876		18.301	0.845176		18.3009	0.849588		18.301	0.845773		18.301	0.850306		18.301	0.84927		18.301	0.850565		18.301	0.849056		18.301	0.856349
18.351	0.820749		18.351	0.851869		18.351	0.833983		18.351	0.846603		18.351	0.842648		18.351	0.848236		18.351	0.845165		18.351	0.849131		18.351	0.845024		18.351	0.850505		18.351	0.84727		18.351	0.849522		18.351	0.848606		18.351	0.849924		18.351	0.848154		18.351	0.852769
18.401	0.823026		18.401	0.850524		18.401	0.835151		18.401	0.849616		18.401	0.840109		18.401	0.847753		18.401	0.844224		18.401	0.849722		18.401	0.845436		18.401	0.847581		18.401	0.846921		18.401	0.852542		18.401	0.848476		18.401	0.849741		18.401	0.851601		18.401	0.852755
18.451	0.82528		18.451	0.850411		18.451	0.835513		18.451	0.849214		18.451	0.84057		18.451	0.848173		18.451	0.844607		18.451	0.849498		18.451	0.847666		18.451	0.851802		18.4511	0.848984		18.451	0.851076		18.451	0.849288		18.451	0.851449		18.451	0.849488		18.451	0.853496
18.501	0.821649		18.501	0.8538		18.501	0.837591		18.501	0.852207		18.501	0.837248		18.501	0.850662		18.501	0.844016		18.501	0.850582		18.501	0.846436		18.501	0.851221		18.5011	0.8451		18.501	0.852242		18.501	0.849014		18.501	0.849819		18.501	0.852204		18.501	0.852041
18.551	0.820905		18.551	0.853529		18.551	0.836423		18.551	0.848547		18.551	0.840292		18.551	0.847084		18.551	0.846056		18.551	0.850037		18.551	0.845255		18.551	0.852465		18.5511	0.845872		18.551	0.847922		18.551	0.847004		18.551	0.850857		18.551	0.850293		18.551	0.852543
18.601	0.822739		18.601	0.852264		18.601	0.831337		18.601	0.84878		18.601	0.84076		18.6011	0.847608		18.601	0.84431		18.601	0.849062		18.601	0.846387		18.601	0.851991		18.6011	0.84671		18.601	0.850994		18.601	0.850455		18.601	0.85057		18.601	0.849073		18.601	0.8521
18.6511	0.82367		18.651	0.850055		18.651	0.834064		18.651	0.845999		18.651	0.836319		18.6511	0.84974		18.651	0.842566		18.651	0.851244		18.651	0.8451		18.651	0.848772		18.6511	0.846458		18.651	0.852435		18.651	0.849171		18.651	0.84813		18.651	0.849841		18.651	0.850949
18.7011	0.82199		18.701	0.847439		18.701	0.837945		18.701	0.848014		18.701	0.838724		18.7011	0.845523		18.7011	0.846381		18.701	0.851814		18.701	0.848454		18.701	0.848502		18.7011	0.844563		18.701	0.849304		18.701	0.85023		18.701	0.849816		18.701	0.84676		18.701	0.850762
18.7511	0.823108		18.751	0.850727		18.751	0.837476		18.751	0.850581		18.751	0.842691		18.7511	0.847445		18.7511	0.846617		18.751	0.85078		18.751	0.848222		18.751	0.851535		18.7511	0.849505		18.751	0.849318		18.751	0.847007		18.751	0.847929		18.751	0.849871		18.7511	0.850926
18.8011	0.821607		18.801	0.852408		18.801	0.834652		18.801	0.847397		18.801	0.838114		18.8011	0.84769		18.8011	0.844702		18.801	0.849606		18.801	0.844104		18.801	0.85115		18.8011	0.847987		18.801	0.848661		18.801	0.850093		18.801	0.851327		18.801	0.850379		18.8011	0.850745
18.8511	0.822726		18.851	0.852237		18.851	0.835733		18.851	0.84756		18.851	0.837631		18.8511	0.848105		18.8511	0.845586		18.851	0.850937		18.851	0.844257		18.851	0.84951		18.8511	0.846461		18.851	0.849427		18.851	0.848794		18.851	0.848858		18.851	0.848667		18.8511	0.850225
18.9011	0.821639		18.901	0.8517		18.901	0.832403		18.901	0.849333		18.901	0.840106		18.9011	0.847567		18.9011	0.846771		18.901	0.850293		18.901	0.846047		18.901	0.848801		18.9011	0.845189		18.901	0.851932		18.901	0.847162		18.901	0.85092		18.901	0.848599		18.9011	0.847168
18.9511	0.820294		18.951	0.849681		18.9511	0.83318		18.951	0.850146		18.951	0.839185		18.9511	0.845645		18.9511	0.844654		18.951	0.848043		18.951	0.844876		18.951	0.848546		18.9511	0.845188		18.951	0.849628		18.951	0.849727		18.951	0.849936		18.951	0.848088		18.9511	0.856365
19.0011	0.821434		19.001	0.852425		19.0011	0.832529		19.001	0.84854		19.001	0.83531		19.0011	0.847598		19.0011	0.844889		19.001	0.849961		19.001	0.845913		19.001	0.851701		19.0011	0.845111		19.001	0.848784		19.001	0.847734		19.001	0.848399		19.001	0.848381		19.0011	0.850487
19.0511	0.820616		19.051	0.851485		19.0511	0.833906		19.051	0.848001		19.051	0.836579		19.0511	0.849423		19.0511	0.842797		19.051	0.850022		19.051	0.847062		19.051	0.849462		19.0511	0.847143		19.051	0.848585		19.051	0.844615		19.051	0.850807		19.051	0.849623		19.0511	0.853728
19.1011	0.821813		19.101	0.850839		19.1011	0.83359		19.101	0.848319		19.101	0.836671		19.1011	0.84821		19.1011	0.84643		19.101	0.848079		19.101	0.844417		19.101	0.850323		19.1011	0.846713		19.101	0.849999		19.1011	0.845701		19.101	0.848922		19.101	0.850116		19.1011	0.852053
19.1511	0.822724		19.151	0.849021		19.1511	0.833502		19.151	0.850443		19.151	0.839215		19.1511	0.846168		19.1511	0.844752		19.151	0.850184		19.151	0.846275		19.151	0.848208		19.1511	0.846367		19.1511	0.850773		19.1511	0.850015		19.151	0.850906		19.151	0.844327		19.1511	0.852124
19.2011	0.821299		19.201	0.849491		19.2011	0.833526		19.201	0.848937		19.201	0.836795		19.2011	0.84865		19.2011	0.845448		19.201	0.848108		19.201	0.846282		19.201	0.847575		19.2011	0.846608		19.2011	0.847854		19.2011	0.850337		19.201	0.850775		19.201	0.846893		19.2011	0.852791
19.2511	0.818708		19.251	0.852389		19.2511	0.834917		19.251	0.849501		19.251	0.837631		19.2511	0.849729		19.2511	0.839967		19.251	0.849929		19.251	0.846763		19.251	0.850163		19.2511	0.845943		19.2511	0.850929		19.2511	0.847369		19.251	0.850424		19.251	0.85156		19.2511	0.850223
19.3011	0.821567		19.301	0.852015		19.3011	0.837138		19.301	0.848084		19.301	0.838251		19.3011	0.850014		19.3011	0.842775		19.301	0.846844		19.301	0.842933		19.301	0.849943		19.3011	0.847089		19.3011	0.85208		19.3011	0.84911		19.301	0.849023		19.301	0.849474		19.3011	0.847331
19.3511	0.822052		19.3511	0.852408		19.3511	0.834683		19.351	0.849657		19.351	0.836579		19.3511	0.848834		19.3511	0.84533		19.351	0.850487		19.351	0.843649		19.351	0.849373		19.3511	0.847374		19.3511	0.845703		19.3511	0.847378		19.351	0.849502		19.351	0.850205		19.3511	0.851048
19.4011	0.822374		19.4011	0.851128		19.4011	0.832716		19.401	0.849278		19.401	0.837842		19.4011	0.845464		19.4011	0.84458		19.4011	0.849127		19.401	0.848187		19.401	0.848748		19.4011	0.845631		19.4011	0.850622		19.4011	0.847404		19.401	0.849007		19.401	0.847918		19.4011	0.849213
19.4511	0.822133		19.4511	0.850943		19.4511	0.834015		19.451	0.847889		19.451	0.839737		19.4511	0.847619		19.4511	0.842702		19.4511	0.848195		19.451	0.847132		19.451	0.848258		19.4511	0.844398		19.4511	0.84908		19.4511	0.847786		19.451	0.85157		19.451	0.852136		19.4511	0.848607
19.5011	0.820924		19.5011	0.851657		19.5011	0.834892		19.501	0.846787		19.501	0.837846		19.5011	0.847919		19.5011	0.84455		19.5011	0.848624		19.5011	0.843077		19.501	0.850035		19.5011	0.845279		19.5011	0.850091		19.5011	0.848259		19.501	0.849556		19.501	0.847237		19.5011	0.849689
19.5511	0.821084		19.5511	0.852254		19.5511	0.835092		19.551	0.846202		19.551	0.839153		19.5511	0.84909		19.5511	0.844205		19.5511	0.84847		19.5511	0.844449		19.551	0.848915		19.5511	0.849825		19.5511	0.850603		19.5511	0.846916		19.551	0.851051		19.551	0.848094		19.5511	0.85126
19.6011	0.823103		19.6011	0.851319		19.6011	0.833909		19.601	0.848264		19.601	0.839232		19.6011	0.847639		19.6011	0.846068		19.6011	0.851805		19.6011	0.847846		19.601	0.849725		19.6011	0.846614		19.6011	0.849836		19.6011	0.847762		19.601	0.849676		19.601	0.849911		19.6011	0.85153
19.6511	0.818448		19.6511	0.848853		19.6511	0.836326		19.6511	0.846382		19.651	0.83965		19.6511	0.846192		19.6511	0.843655		19.6511	0.849005		19.6511	0.845634		19.651	0.848288		19.6511	0.84484		19.6511	0.84996		19.6511	0.848266		19.651	0.848336		19.651	0.850045		19.6511	0.849773
19.7011	0.821619		19.7011	0.850426		19.7011	0.83628		19.7011	0.847713		19.701	0.841095		19.7011	0.851517		19.7011	0.841692		19.7011	0.849204		19.7011	0.844829		19.701	0.847246		19.7011	0.845611		19.7011	0.847294		19.7011	0.844234		19.701	0.849149		19.701	0.85041		19.7011	0.851333
19.7511	0.821321		19.7511	0.853084		19.7511	0.831932		19.7511	0.848233		19.7511	0.83886		19.7511	0.846218		19.7511	0.844964		19.7511	0.846695		19.7511	0.846008		19.751	0.847842		19.7511	0.845148		19.7511	0.847879		19.7511	0.846336		19.751	0.847314		19.751	0.848412		19.7511	0.848677
19.8011	0.823125		19.8011	0.852211		19.8011	0.831677		19.8011	0.84574		19.8011	0.839507		19.8011	0.846321		19.8011	0.844034		19.8011	0.848031		19.8011	0.845713		19.801	0.850932		19.8011	0.844895		19.8011	0.847898		19.8011	0.84736		19.8011	0.851317		19.801	0.850012		19.8011	0.848926
19.8511	0.821599		19.8511	0.85105		19.8511	0.83396		19.8511	0.846848		19.8511	0.83926		19.8511	0.847944		19.8511	0.844851		19.8511	0.846309		19.8511	0.845554		19.851	0.8515		19.8511	0.846864		19.8511	0.84815		19.8511	0.848986		19.8511	0.849509		19.851	0.849223		19.8511	0.851975
19.9011	0.819585		19.9011	0.850071		19.9011	0.833036		19.9011	0.846987		19.9011	0.836839		19.9011	0.847945		19.9011	0.842502		19.9011	0.849097		19.9011	0.844687		19.901	0.847816		19.9011	0.845848		19.9011	0.847273		19.9011	0.846725		19.9011	0.853656		19.9011	0.848183		19.9011	0.852008
19.9511	0.820926		19.9511	0.850123		19.9511	0.833216		19.9511	0.847061		19.9511	0.839693		19.9511	0.847842		19.9511	0.842584		19.9511	0.848246		19.9511	0.844393		19.951	0.849411		19.9511	0.845125		19.9511	0.848872		19.9511	0.846817		19.9511	0.847244		19.9511	0.850181		19.9511	0.85246
20.0011	0.82068		20.0011	0.849627		20.0011	0.835892		20.0011	0.846542		20.0011	0.838754		20.0011	0.849771		20.0011	0.843504		20.0011	0.848217		20.0011	0.843873		20.001	0.849782		20.0011	0.848173		20.0011	0.849388		20.0011	0.8458		20.0011	0.850976		20.0011	0.849247		20.0011	0.850684
20.0511	0.820652		20.0511	0.853046		20.0511	0.834844		20.0511	0.846847		20.0511	0.8355		20.0511	0.84754		20.0511	0.844858		20.0511	0.848994		20.0511	0.843774		20.051	0.850038		20.0511	0.846061		20.0511	0.850761		20.0511	0.850882		20.0511	0.849728		20.0511	0.847844		20.0511	0.851706
20.1011	0.821136		20.1011	0.849339		20.1011	0.835056		20.1011	0.848616		20.1011	0.836121		20.1011	0.847498		20.1011	0.841291		20.1011	0.850256		20.1011	0.846195		20.101	0.851324		20.1011	0.847564		20.1011	0.850415		20.1011	0.846494		20.1011	0.848281		20.1011	0.849825		20.1011	0.850542
20.1511	0.819089		20.1511	0.84884		20.1511	0.833604		20.1511	0.847748		20.1511	0.838815		20.1511	0.850518		20.1511	0.845084		20.1511	0.849827		20.1511	0.844205		20.151	0.848668		20.1511	0.845264		20.1511	0.847452		20.1511	0.84916		20.1511	0.849184		20.1511	0.846733		20.1511	0.851695
20.2011	0.81998		20.2011	0.848077		20.2011	0.833885		20.2011	0.847601		20.2011	0.837002		20.2011	0.847019		20.2011	0.842047		20.2011	0.846694		20.2011	0.844103		20.2011	0.849173		20.2011	0.845486		20.2011	0.847051		20.2011	0.845246		20.2011	0.846808		20.2011	0.847013		20.2011	0.851698
20.2511	0.820799		20.2511	0.852145		20.2511	0.833929		20.2511	0.847442		20.2511	0.839169		20.2511	0.848863		20.2511	0.844472		20.2511	0.8476		20.2511	0.843368		20.2511	0.847457		20.2512	0.848491		20.2511	0.848329		20.2511	0.849786		20.2511	0.849091		20.2511	0.847071		20.2511	0.851471
20.3011	0.820856		20.3011	0.852334		20.3011	0.833053		20.3011	0.85171		20.3011	0.840255		20.3011	0.849265		20.3011	0.842933		20.3011	0.847609		20.3011	0.843647		20.3011	0.848762		20.3012	0.8438		20.3011	0.848743		20.3011	0.846572		20.3011	0.852317		20.3011	0.846486		20.3011	0.846225
20.3511	0.821558		20.3511	0.850901		20.3511	0.833862		20.3511	0.846767		20.3511	0.840128		20.3511	0.847794		20.3511	0.84513		20.3511	0.848791		20.3511	0.843637		20.3511	0.850742		20.3512	0.844497		20.3511	0.849702		20.3511	0.847731		20.3511	0.848799		20.3511	0.848783		20.3511	0.849912
20.4011	0.821719		20.4011	0.847839		20.4011	0.833883		20.4011	0.851018		20.4011	0.839543		20.4011	0.844841		20.4011	0.840573		20.4011	0.848427		20.4011	0.845364		20.4011	0.848961		20.4012	0.84278		20.4011	0.848636		20.4011	0.850162		20.4011	0.847025		20.4011	0.849932		20.4011	0.850911
20.4512	0.818599		20.4511	0.851004		20.4511	0.833337		20.4511	0.849017		20.4511	0.836717		20.4512	0.845957		20.4511	0.843617		20.4511	0.847978		20.4511	0.847081		20.4511	0.847008		20.4512	0.842383		20.4511	0.847374		20.4511	0.84729		20.4511	0.845947		20.4511	0.846294		20.4511	0.850325
20.5012	0.820774		20.5011	0.851639		20.5011	0.830866		20.5011	0.846411		20.5011	0.837191		20.5012	0.849586		20.5011	0.843115		20.5011	0.848037		20.5011	0.846483		20.5011	0.848498		20.5012	0.845561		20.5011	0.848663		20.5011	0.848736		20.5011	0.847863		20.5011	0.847919		20.5011	0.85017
20.5512	0.820039		20.5511	0.852225		20.5511	0.835108		20.5511	0.848738		20.5511	0.836478		20.5512	0.845285		20.5512	0.842532		20.5511	0.847133		20.5511	0.846813		20.5511	0.848132		20.5512	0.843209		20.5511	0.848942		20.5511	0.846931		20.5511	0.847993		20.5511	0.847895		20.5511	0.848207
20.6012	0.819047		20.6011	0.848056		20.6011	0.833354		20.6011	0.843835		20.6011	0.836868		20.6012	0.84646		20.6012	0.841229		20.6011	0.849314		20.6011	0.845656		20.6011	0.849402		20.6012	0.845638		20.6011	0.844494		20.6011	0.846369		20.6011	0.84582		20.6011	0.84663		20.6012	0.850527
20.6512	0.820057		20.6511	0.853947		20.6511	0.833254		20.6511	0.847588		20.6511	0.837334		20.6512	0.849003		20.6512	0.845632		20.6511	0.848456		20.6511	0.845998		20.6511	0.848982		20.6512	0.84685		20.6511	0.848244		20.6511	0.848097		20.6511	0.844552		20.6511	0.846435		20.6512	0.850338
20.7012	0.820653		20.7011	0.851668		20.7011	0.833401		20.7011	0.847618		20.7011	0.837882		20.7012	0.84687		20.7012	0.844569		20.7011	0.849383		20.7011	0.845588		20.7011	0.847733		20.7012	0.846152		20.7011	0.848587		20.7011	0.848311		20.7011	0.844408		20.7011	0.844488		20.7012	0.848689
20.7512	0.819156		20.7511	0.851034		20.7511	0.834054		20.7511	0.847326		20.7511	0.837457		20.7512	0.846644		20.7512	0.844318		20.7511	0.849006		20.7511	0.843558		20.7511	0.849969		20.7512	0.845356		20.7511	0.848291		20.7511	0.843967		20.7511	0.847522		20.7511	0.84763		20.7512	0.849985
20.8012	0.82241		20.8011	0.851427		20.8012	0.832751		20.8011	0.847253		20.8011	0.838204		20.8012	0.847925		20.8012	0.842201		20.8011	0.847636		20.8011	0.845094		20.8011	0.848064		20.8012	0.846989		20.8011	0.847098		20.8011	0.846459		20.8011	0.847195		20.8011	0.848841		20.8012	0.850134
20.8512	0.820736		20.8511	0.852419		20.8512	0.829831		20.8511	0.849396		20.8511	0.838524		20.8512	0.846947		20.8512	0.844539		20.8511	0.848653		20.8511	0.84589		20.8511	0.851487		20.8512	0.844703		20.8511	0.846636		20.8511	0.847906		20.8511	0.846546		20.8511	0.850307		20.8512	0.847494
20.9012	0.819451		20.9011	0.848898		20.9012	0.833849		20.9011	0.847763		20.9011	0.838643		20.9012	0.844235		20.9012	0.844144		20.9011	0.848197		20.9011	0.845838		20.9011	0.848251		20.9012	0.845003		20.9011	0.847759		20.9012	0.845197		20.9011	0.849432		20.9011	0.84907		20.9012	0.852442
20.9512	0.820028		20.9511	0.849716		20.9512	0.834183		20.9511	0.84571		20.9511	0.837799		20.9512	0.848076		20.9512	0.841682		20.9511	0.844684		20.9511	0.842327		20.9511	0.850352		20.9512	0.846676		20.9512	0.847912		20.9512	0.847235		20.9511	0.851144		20.9511	0.847366		20.9512	0.849536
21.0012	0.820834		21.0011	0.850468		21.0012	0.835752		21.0011	0.847908		21.0011	0.837197		21.0012	0.846509		21.0012	0.842487		21.0011	0.847797		21.0011	0.840635		21.0011	0.847192		21.0012	0.842417		21.0012	0.847685		21.0012	0.845883		21.0011	0.848217		21.0011	0.848995		21.0012	0.850854
21.0512	0.828342		21.0511	0.856957		21.0512	0.842477		21.0511	0.853778		21.0511	0.846005		21.0512	0.854916		21.0512	0.848891		21.0511	0.856054		21.0511	0.852697		21.0511	0.856184		21.0512	0.850164		21.0512	0.855525		21.0512	0.854283		21.0511	0.855604		21.0511	0.853798		21.0512	0.857057
21.1012	0.840713		21.1011	0.867894		21.1012	0.852665		21.1011	0.866893		21.1011	0.856097		21.1012	0.866455		21.1012	0.858371		21.1011	0.864449		21.1011	0.864342		21.1011	0.865138		21.1012	0.862571		21.1012	0.865825		21.1012	0.862287		21.1011	0.866453		21.1011	0.862815		21.1012	0.870536
21.1512	0.845966		21.1512	0.873587		21.1512	0.85985		21.1511	0.870229		21.1511	0.862527		21.1512	0.872783		21.1512	0.865727		21.1511	0.870827		21.1511	0.870079		21.1511	0.87208		21.1512	0.870812		21.1512	0.871904		21.1512	0.867101		21.1511	0.871987		21.1511	0.868028		21.1512	0.873122
21.2012	0.851427		21.2012	0.876269		21.2012	0.861915		21.2011	0.874996		21.2011	0.867189		21.2012	0.876645		21.2012	0.87082		21.2012	0.877068		21.2011	0.872687		21.2011	0.874395		21.2012	0.874135		21.2012	0.876057		21.2012	0.874887		21.2011	0.874405		21.2011	0.877064		21.2012	0.878532
21.2512	0.853632		21.2512	0.881163		21.2512	0.866913		21.2511	0.876134		21.2511	0.870625		21.2512	0.878808		21.2512	0.874383		21.2512	0.87895		21.2511	0.877553		21.2511	0.877171		21.2512	0.879246		21.2512	0.877497		21.2512	0.876234		21.2511	0.877016		21.2511	0.880656		21.2512	0.884087
21.3012	0.859381		21.3012	0.89019		21.3012	0.869633		21.3011	0.882075		21.3011	0.873942		21.3012	0.882329		21.3012	0.877756		21.3012	0.883091		21.3012	0.879782		21.3011	0.883285		21.3012	0.880042		21.3012	0.880159		21.3012	0.88224		21.3011	0.881053		21.3011	0.881797		21.3012	0.88301
21.3512	0.859103		21.3512	0.885173		21.3512	0.871822		21.3511	0.883111		21.3511	0.875309		21.3512	0.883735		21.3512	0.87996		21.3512	0.885026		21.3512	0.881364		21.3511	0.88578		21.3512	0.881587		21.3512	0.88741		21.3512	0.883946		21.3511	0.886354		21.3511	0.884699		21.3512	0.885079
21.4012	0.861503		21.4012	0.888866		21.4012	0.873716		21.4011	0.887094		21.4011	0.879273		21.4012	0.887753		21.4012	0.883706		21.4012	0.887819		21.4012	0.883407		21.4011	0.890759		21.4012	0.884991		21.4012	0.888387		21.4012	0.885167		21.4011	0.886999		21.4011	0.88589		21.4012	0.890264
21.4512	0.864683		21.4512	0.891336		21.4512	0.874041		21.4511	0.886638		21.4511	0.876057		21.4512	0.887924		21.4512	0.88529		21.4512	0.888418		21.4512	0.885258		21.4511	0.887861		21.4512	0.886932		21.4512	0.890491		21.4512	0.887292		21.4511	0.889032		21.4511	0.890263		21.4512	0.891634
21.5012	0.866664		21.5012	0.891138		21.5012	0.878229		21.5012	0.88987		21.5011	0.881434		21.5012	0.891548		21.5012	0.886651		21.5012	0.887609		21.5012	0.886643		21.5011	0.889718		21.5012	0.885494		21.5012	0.889029		21.5012	0.885744		21.5011	0.890235		21.5011	0.887763		21.5012	0.890938
21.5512	0.86844		21.5512	0.893573		21.5512	0.881046		21.5512	0.890548		21.5512	0.88199		21.5512	0.891596		21.5512	0.886795		21.5512	0.894347		21.5512	0.886469		21.5511	0.894263		21.5512	0.888615		21.5512	0.891854		21.5512	0.889685		21.5511	0.89034		21.5511	0.891139		21.5512	0.892282
21.6012	0.870027		21.6012	0.897843		21.6012	0.882409		21.6012	0.893906		21.6012	0.884823		21.6012	0.892213		21.6012	0.88677		21.6012	0.896506		21.6012	0.889825		21.6011	0.894805		21.6012	0.889538		21.6012	0.892384		21.6012	0.893307		21.6012	0.893477		21.6011	0.893048		21.6012	0.896481
21.6512	0.871725		21.6512	0.898226		21.6512	0.881673		21.6512	0.894073		21.6512	0.884652		21.6512	0.895375		21.6512	0.891583		21.6512	0.895671		21.6512	0.891836		21.6511	0.8918		21.6512	0.891208		21.6512	0.895768		21.6512	0.89406		21.6512	0.89516		21.6511	0.897602		21.6512	0.898056
21.7012	0.874782		21.7012	0.899891		21.7012	0.883621		21.7012	0.895325		21.7012	0.887444		21.7012	0.893874		21.7012	0.889569		21.7012	0.895617		21.7012	0.894563		21.7011	0.895907		21.7012	0.893798		21.7012	0.895235		21.7012	0.896099		21.7012	0.89525		21.7012	0.894116		21.7012	0.899549
21.7512	0.874438		21.7512	0.900357		21.7512	0.886011		21.7512	0.898143		21.7512	0.889289		21.7512	0.897251		21.7512	0.892677		21.7512	0.901344		21.7512	0.894354		21.7511	0.898499		21.7512	0.895643		21.7512	0.897942		21.7512	0.895392		21.7512	0.897587		21.7512	0.897417		21.7512	0.898545
21.8012	0.878008		21.8012	0.900428		21.8012	0.886601		21.8012	0.898095		21.8012	0.888684		21.8012	0.897221		21.8012	0.894674		21.8012	0.898139		21.8012	0.89743		21.8011	0.899805		21.8012	0.896118		21.8012	0.8988		21.8012	0.897835		21.8012	0.899034		21.8012	0.899837		21.8012	0.900305
21.8512	0.877097		21.8512	0.903707		21.8512	0.885251		21.8512	0.899225		21.8512	0.893171		21.8512	0.899539		21.8512	0.897384		21.8512	0.900566		21.8512	0.894778		21.8511	0.899426		21.8512	0.898522		21.8512	0.898739		21.8512	0.897059		21.8512	0.900672		21.8512	0.899981		21.8512	0.898412
21.9012	0.878152		21.9012	0.904944		21.9012	0.888391		21.9012	0.898304		21.9012	0.890808		21.9012	0.89747		21.9012	0.898501		21.9012	0.901149		21.9012	0.898069		21.9011	0.897985		21.9012	0.898412		21.9012	0.899666		21.9012	0.899902		21.9012	0.900635		21.9012	0.900549		21.9012	0.902445
21.9512	0.880462		21.9512	0.905331		21.9512	0.887783		21.9512	0.899941		21.9512	0.892475		21.9512	0.900927		21.9512	0.898263		21.9512	0.901745		21.9512	0.897601		21.9511	0.899686		21.9512	0.898603		21.9512	0.903879		21.9512	0.902155		21.9512	0.902887		21.9512	0.904951		21.9512	0.900682
21.9912	0.880462		21.9912	0.905331		21.9912	0.887783		21.9912	0.899941		21.9912	0.892475		21.9912	0.900927		21.9912	0.898263		21.9912	0.901745		21.9912	0.897601		21.9911	0.899686		21.9912	0.898603		21.9912	0.903879		21.9912	0.902155		21.9912	0.902887		21.9912	0.904951		21.9912	0.900682
