# Supplementary material for: Binding and sequestration of poison frog alkaloids by a plasma globulin
Source: eLife journal article supplement (doi:10.7554/elife.85096), 2023-12-14
Supplement: fig5-data1 [file BSA+PTX_R3 analysis_CapillaryScanRawData.xlsx]

## Sheet: RawData
NanoTemper Technologies	NanoTemper Technologies
MO.Affinity Analysis v3.0.5	MO.Affinity Analysis v3.0.5
Origin of exported data	Origin of exported data
Project Title:	20230407_BSA+PTX
Comment:
Project File Path:	C:\Users\nanotemper\Desktop\Aurora_MST\20230407_BSA\BSA+PTX analysis.nta3
Analysis-Set Name:	Analysis-Set #1
Exported from:	Capillary Scan (Raw Data Inspection)
Exported on:	2023-04-07 09:25:10
Sample Information	Sample Information		Sample Information	Sample Information		Sample Information	Sample Information		Sample Information	Sample Information		Sample Information	Sample Information		Sample Information	Sample Information		Sample Information	Sample Information		Sample Information	Sample Information		Sample Information	Sample Information		Sample Information	Sample Information		Sample Information	Sample Information		Sample Information	Sample Information		Sample Information	Sample Information		Sample Information	Sample Information		Sample Information	Sample Information		Sample Information	Sample Information
Merge-Set Name:	BSA+PTX_R3 (#18)		Merge-Set Name:	BSA+PTX_R3 (#18)		Merge-Set Name:	BSA+PTX_R3 (#18)		Merge-Set Name:	BSA+PTX_R3 (#18)		Merge-Set Name:	BSA+PTX_R3 (#18)		Merge-Set Name:	BSA+PTX_R3 (#18)		Merge-Set Name:	BSA+PTX_R3 (#18)		Merge-Set Name:	BSA+PTX_R3 (#18)		Merge-Set Name:	BSA+PTX_R3 (#18)		Merge-Set Name:	BSA+PTX_R3 (#18)		Merge-Set Name:	BSA+PTX_R3 (#18)		Merge-Set Name:	BSA+PTX_R3 (#18)		Merge-Set Name:	BSA+PTX_R3 (#18)		Merge-Set Name:	BSA+PTX_R3 (#18)		Merge-Set Name:	BSA+PTX_R3 (#18)		Merge-Set Name:	BSA+PTX_R3 (#18)
Run Name:	BSA+PTX_R3 (#18)		Run Name:	BSA+PTX_R3 (#18)		Run Name:	BSA+PTX_R3 (#18)		Run Name:	BSA+PTX_R3 (#18)		Run Name:	BSA+PTX_R3 (#18)		Run Name:	BSA+PTX_R3 (#18)		Run Name:	BSA+PTX_R3 (#18)		Run Name:	BSA+PTX_R3 (#18)		Run Name:	BSA+PTX_R3 (#18)		Run Name:	BSA+PTX_R3 (#18)		Run Name:	BSA+PTX_R3 (#18)		Run Name:	BSA+PTX_R3 (#18)		Run Name:	BSA+PTX_R3 (#18)		Run Name:	BSA+PTX_R3 (#18)		Run Name:	BSA+PTX_R3 (#18)		Run Name:	BSA+PTX_R3 (#18)
Date of Measurement:	2023-04-07 09:08:43		Date of Measurement:	2023-04-07 09:09:09		Date of Measurement:	2023-04-07 09:09:36		Date of Measurement:	2023-04-07 09:10:02		Date of Measurement:	2023-04-07 09:10:29		Date of Measurement:	2023-04-07 09:10:56		Date of Measurement:	2023-04-07 09:11:23		Date of Measurement:	2023-04-07 09:11:49		Date of Measurement:	2023-04-07 09:12:16		Date of Measurement:	2023-04-07 09:12:42		Date of Measurement:	2023-04-07 09:13:09		Date of Measurement:	2023-04-07 09:13:36		Date of Measurement:	2023-04-07 09:14:03		Date of Measurement:	2023-04-07 09:14:29		Date of Measurement:	2023-04-07 09:14:56		Date of Measurement:	2023-04-07 09:15:22
Capillary Type:	Monolith Premium Capillary		Capillary Type:	Monolith Premium Capillary		Capillary Type:	Monolith Premium Capillary		Capillary Type:	Monolith Premium Capillary		Capillary Type:	Monolith Premium Capillary		Capillary Type:	Monolith Premium Capillary		Capillary Type:	Monolith Premium Capillary		Capillary Type:	Monolith Premium Capillary		Capillary Type:	Monolith Premium Capillary		Capillary Type:	Monolith Premium Capillary		Capillary Type:	Monolith Premium Capillary		Capillary Type:	Monolith Premium Capillary		Capillary Type:	Monolith Premium Capillary		Capillary Type:	Monolith Premium Capillary		Capillary Type:	Monolith Premium Capillary		Capillary Type:	Monolith Premium Capillary
Capillary Position:	1		Capillary Position:	9		Capillary Position:	2		Capillary Position:	10		Capillary Position:	3		Capillary Position:	11		Capillary Position:	4		Capillary Position:	12		Capillary Position:	5		Capillary Position:	13		Capillary Position:	6		Capillary Position:	14		Capillary Position:	7		Capillary Position:	15		Capillary Position:	8		Capillary Position:	16
Ligand:	PTX		Ligand:	PTX		Ligand:	PTX		Ligand:	PTX		Ligand:	PTX		Ligand:	PTX		Ligand:	PTX		Ligand:	PTX		Ligand:	PTX		Ligand:	PTX		Ligand:	PTX		Ligand:	PTX		Ligand:	PTX		Ligand:	PTX		Ligand:	PTX		Ligand:	PTX
Ligand Concentration:	0.005		Ligand Concentration:	1.95313e-05		Ligand Concentration:	0.0025		Ligand Concentration:	9.76563e-06		Ligand Concentration:	0.00125		Ligand Concentration:	4.88281e-06		Ligand Concentration:	0.000625		Ligand Concentration:	2.44141e-06		Ligand Concentration:	0.0003125		Ligand Concentration:	1.2207e-06		Ligand Concentration:	0.00015625		Ligand Concentration:	6.10352e-07		Ligand Concentration:	7.8125e-05		Ligand Concentration:	3.05176e-07		Ligand Concentration:	3.90625e-05		Ligand Concentration:	1.52588e-07
Target:	BSA		Target:	BSA		Target:	BSA		Target:	BSA		Target:	BSA		Target:	BSA		Target:	BSA		Target:	BSA		Target:	BSA		Target:	BSA		Target:	BSA		Target:	BSA		Target:	BSA		Target:	BSA		Target:	BSA		Target:	BSA
TargetConcentration:	5e-09		TargetConcentration:	5e-09		TargetConcentration:	5e-09		TargetConcentration:	5e-09		TargetConcentration:	5e-09		TargetConcentration:	5e-09		TargetConcentration:	5e-09		TargetConcentration:	5e-09		TargetConcentration:	5e-09		TargetConcentration:	5e-09		TargetConcentration:	5e-09		TargetConcentration:	5e-09		TargetConcentration:	5e-09		TargetConcentration:	5e-09		TargetConcentration:	5e-09		TargetConcentration:	5e-09
Measurement Settings	Measurement Settings		Measurement Settings	Measurement Settings		Measurement Settings	Measurement Settings		Measurement Settings	Measurement Settings		Measurement Settings	Measurement Settings		Measurement Settings	Measurement Settings		Measurement Settings	Measurement Settings		Measurement Settings	Measurement Settings		Measurement Settings	Measurement Settings		Measurement Settings	Measurement Settings		Measurement Settings	Measurement Settings		Measurement Settings	Measurement Settings		Measurement Settings	Measurement Settings		Measurement Settings	Measurement Settings		Measurement Settings	Measurement Settings		Measurement Settings	Measurement Settings
MST-Power:	Medium		MST-Power:	Medium		MST-Power:	Medium		MST-Power:	Medium		MST-Power:	Medium		MST-Power:	Medium		MST-Power:	Medium		MST-Power:	Medium		MST-Power:	Medium		MST-Power:	Medium		MST-Power:	Medium		MST-Power:	Medium		MST-Power:	Medium		MST-Power:	Medium		MST-Power:	Medium		MST-Power:	Medium
Excitation-Power:	30		Excitation-Power:	30		Excitation-Power:	30		Excitation-Power:	30		Excitation-Power:	30		Excitation-Power:	30		Excitation-Power:	30		Excitation-Power:	30		Excitation-Power:	30		Excitation-Power:	30		Excitation-Power:	30		Excitation-Power:	30		Excitation-Power:	30		Excitation-Power:	30		Excitation-Power:	30		Excitation-Power:	30
Excitation type:	Pico - RED		Excitation type:	Pico - RED		Excitation type:	Pico - RED		Excitation type:	Pico - RED		Excitation type:	Pico - RED		Excitation type:	Pico - RED		Excitation type:	Pico - RED		Excitation type:	Pico - RED		Excitation type:	Pico - RED		Excitation type:	Pico - RED		Excitation type:	Pico - RED		Excitation type:	Pico - RED		Excitation type:	Pico - RED		Excitation type:	Pico - RED		Excitation type:	Pico - RED		Excitation type:	Pico - RED
Thermostat Setpoint:	25		Thermostat Setpoint:	25		Thermostat Setpoint:	25		Thermostat Setpoint:	25		Thermostat Setpoint:	25		Thermostat Setpoint:	25		Thermostat Setpoint:	25		Thermostat Setpoint:	25		Thermostat Setpoint:	25		Thermostat Setpoint:	25		Thermostat Setpoint:	25		Thermostat Setpoint:	25		Thermostat Setpoint:	25		Thermostat Setpoint:	25		Thermostat Setpoint:	25		Thermostat Setpoint:	25
Included	Included		Included	Included		Included	Included		Included	Included		Included	Included		Included	Included		Included	Included		Included	Included		Included	Included		Included	Included		Included	Included		Included	Included		Included	Included		Included	Included		Included	Included		Included	Included
Position [capillary-index]	Raw Fluorescence [counts]		Position [capillary-index]	Raw Fluorescence [counts]		Position [capillary-index]	Raw Fluorescence [counts]		Position [capillary-index]	Raw Fluorescence [counts]		Position [capillary-index]	Raw Fluorescence [counts]		Position [capillary-index]	Raw Fluorescence [counts]		Position [capillary-index]	Raw Fluorescence [counts]		Position [capillary-index]	Raw Fluorescence [counts]		Position [capillary-index]	Raw Fluorescence [counts]		Position [capillary-index]	Raw Fluorescence [counts]		Position [capillary-index]	Raw Fluorescence [counts]		Position [capillary-index]	Raw Fluorescence [counts]		Position [capillary-index]	Raw Fluorescence [counts]		Position [capillary-index]	Raw Fluorescence [counts]		Position [capillary-index]	Raw Fluorescence [counts]		Position [capillary-index]	Raw Fluorescence [counts]
0.500272	178.716		8.50148	101.822		1.50047	90.5105		9.50015	85.0618		2.50014	80.7404		10.5001	74.3344		3.50021	74.0511		11.5011	59.9715		4.50033	91.5543		12.5008	70.5558		5.50123	70.681		13.5015	69.7178		6.50027	70.5767		14.5017	71.8799		7.50061	76.929		15.5	74.1226
0.501314	158.182		8.50294	115.986		1.50145	92.5295		9.50188	80.2752		2.50188	73.89		10.5013	79.6101		3.50209	93.2393		11.5025	66.1479		4.50117	94.5575		12.5025	64.9192		5.50304	70.6512		13.5025	56.9832		6.50131	75.9598		14.5029	65.7185		7.50144	72.9029		15.5012	83.9792
0.502425	168.865		8.50391	98.363		1.50311	95.6401		9.50348	83.0487		2.50355	79.9829		10.5021	87.895		3.50334	88.7778		11.5034	71.8829		4.50256	86.0519		12.5036	62.0323		5.50422	73.9586		13.5036	64.0394		6.50235	87.5073		14.5037	73.2041		7.50242	63.8724		15.502	89.8037
0.504022	174.773		8.50502	116.114		1.50485	110.996		9.50452	82.9533		2.50445	86.6216		10.5034	91.4082		3.5041	78.7184		11.5047	78.3456		4.50422	83.9703		12.5046	64.2094		5.50512	82.2882		13.5053	71.5757		6.50395	77.2243		14.505	81.5367		7.50408	70.4782		15.5034	88.8285
0.505689	180.696		8.50669	130.697		1.50589	116.528		9.50556	71.3968		2.50535	75.8315		10.5052	69.5239		3.50535	68.2355		11.5066	63.1447		4.50554	91.1159		12.5062	69.7386		5.50665	90.9907		13.5069	72.542		6.50568	79.8368		14.5067	71.0002		7.50561	68.8857		15.5052	76.7501
0.5068	190.63		8.50836	114.608		1.50672	101.008		9.50723	69.7118		2.50695	73.7439		10.5065	72.5062		3.50709	82.4702		11.508	65.4202		4.50651	81.5963		12.508	67.7196		5.50852	80.0455		13.5078	63.6428		6.50687	73.1236		14.5081	70.5588		7.50672	62.2619		15.5064	87.4477
0.507842	192.739		8.50947	126.495		1.50818	102.148		9.50897	80.9313		2.50862	81.0953		10.5074	77.4032		3.50848	81.8856		11.5088	91.9957		4.50783	95.3598		12.509	75.3335		5.50971	73.6395		13.5089	62.6049		6.50784	75.8912		14.509	76.4369		7.50776	60.4457		15.5073	83.4752
0.509369	179.139		8.51044	113.931		1.50985	107.513		9.50994	81.2057		2.50973	81.3339		10.5087	79.6608		3.50945	84.4206		11.5099	80.9313		4.50957	104.343		12.5099	60.8811		5.51047	70.5737		13.5105	70.7675		6.5093	73.228		14.5103	78.787		7.50929	58.1523		15.5087	73.7469
0.511105	177.114		8.51204	103.042		1.51103	100.436		9.51077	86.4695		2.5107	82.5835		10.5104	89.6486		3.51063	85.6553		11.5116	80.3676		4.5111	93.7881		12.5112	70.3798		5.51186	71.9992		13.5121	66.2732		6.5111	63.9082		14.512	72.4973		7.51103	62.1814		15.5105	81.4323
0.512286	186.947		8.51377	102.646		1.512	107.808		9.5123	94.2056		2.51216	82.8459		10.512	87.7191		3.51237	89.2579		11.5131	74.6654		4.512	86.0758		12.513	73.4576		5.51359	63.9619		13.5131	73.0848		6.51235	68.8887		14.5135	72.4018		7.51228	72.0082		15.5119	81.0655
0.513258	178.051		8.51489	115.267		1.51339	107.677		9.51397	89.0372		2.51389	79.4014		10.5129	75.9806		3.51396	70.9196		11.514	65.1429		4.51318	90.7342		12.5142	66.4521		5.51491	72.3482		13.5141	82.4165		6.51325	74.9309		14.5145	70.5349		7.51318	63.7173		15.5129	78.8556
0.514786	174.206		8.51586	120.868		1.51513	102.514		9.51515	78.781		2.51521	80.1708		10.514	70.0816		3.51493	79.6757		11.5152	71.5728		4.51492	81.3816		12.5151	71.3431		5.51589	76.264		13.5157	78.1458		6.51471	68.2505		14.5156	72.0976		7.51464	66.5923		15.5141	69.4464
0.516592	180.034		8.51746	126.018		1.51651	100.868		9.51612	82.163		2.51619	79.3864		10.5158	69.3539		3.51605	80.8716		11.5169	81.1699		4.51651	87.4387		12.5165	74.7638		5.51714	67.4572		13.5174	72.6911		6.51652	77.1885		14.5174	77.0244		7.51638	77.1139		15.5159	66.5654
0.517703	171.931		8.51919	113.779		1.51749	108.658		9.51758	100.922		2.51751	75.9955		10.5174	70.9226		3.51771	75.8822		11.5186	70.6035		4.51749	85.9177		12.5183	61.4299		5.51887	70.2933		13.5187	73.7707		6.51777	85.5777		14.519	67.141		7.51769	85.9863		15.5174	77.7342
0.518536	157.881		8.5203	109.195		1.51874	96.4662		9.51938	91.2591		2.51931	66.2255		10.5184	70.2904		3.51938	82.5477		11.5196	67.6957		4.5186	90.6089		12.5197	68.7246		5.5204	73.7528		13.5196	68.9781		6.5186	72.885		14.52	68.4354		7.5186	79.2224		15.5184	80.6181
0.519925	178.999		8.52107	118.819		1.52047	96.8897		9.5207	76.4787		2.5207	89.5025		10.5195	67.3886		3.52049	80.8448		11.5206	70.9763		4.52033	87.0749		12.5206	72.1991		5.52137	70.0548		13.521	66.5654		6.51985	74.0063		14.521	72.3959		7.51999	77.7641		15.5196	77.4718
0.521592	189.357		8.52252	123.57		1.522	103.394		9.5216	82.8668		2.5216	74.2956		10.5211	79.5266		3.52146	78.8705		11.5222	78.104		4.52193	80.2155		12.5219	76.5711		5.52255	69.8669		13.5228	65.5216		6.52159	78.0146		14.5228	69.4255		7.52186	63.8515		15.5213	65.4829
0.522911	183.798		8.52426	113.737		1.52297	101.736		9.52292	93.9312		2.52292	74.5312		10.5229	78.7154		3.52313	88.8732		11.524	64.5911		4.52283	90.4717		12.5237	81.4979		5.52429	76.5532		13.5241	77.263		6.52298	59.3184		14.5244	65.3129		7.52318	62.5184		15.5229	72.3064
0.523814	162.209		8.52551	109.729		1.52415	107.289		9.52473	83.5378		2.5248	69.2555		10.5238	59.5272		3.52486	87.9576		11.5251	67.0486		4.52381	93.3974		12.5252	80.5943		5.52589	71.8084		13.525	74.8265		6.52395	68.7873		14.5253	78.5782		7.52394	71.6801		15.5238	68.7336
0.525133	165.203		8.52648	115.147		1.52596	112.535		9.52612	81.3876		2.52619	74.066		10.5247	73.2011		3.52591	95.0198		11.5261	73.2876		4.5254	87.048		12.5261	71.8859		5.52686	70.2963		13.5264	78.4053		6.52513	72.5867		14.5262	79.0673		7.52519	74.0839		15.5248	78.6707
0.526939	178.877		8.5278	122.305		1.52756	108.682		9.52702	85.032		2.52695	85.0022		10.5263	72.7538		3.52674	75.7778		11.5277	70.0249		4.52707	79.8219		12.5273	74.0481		5.5279	69.9713		13.5282	82.1242		6.52687	76.9797		14.5278	75.7122		7.52686	76.4548		15.5264	81.2265
0.528397	179.849		8.52954	105.485		1.52839	104.205		9.52827	86.2279		2.52813	88.1962		10.5279	67.6987		3.5282	83.681		11.5295	63.4161		4.52811	91.6438		12.5291	71.2358		5.52971	65.5783		13.5296	76.6904		6.52846	73.8035		14.5295	76.2252		7.52832	78.2233		15.528	76.2282
0.5293	189.085		8.531	116.824		1.52936	99.9048		9.53015	94.8677		2.5298	87.2508		10.529	72.6404		3.52993	95.0914		11.5305	63.258		4.52915	93.9312		12.5306	70.6572		5.53137	68.6143		13.5304	82.2525		6.52944	62.9867		14.5306	85.5181		7.52929	66.0525		15.5291	74.1495
0.53048	181.638		8.53197	115.98		1.53103	105.377		9.5316	85.1215		2.53126	80.0873		10.53	66.7653		3.53112	95.1152		11.5313	59.1365		4.53068	81.1311		12.5315	70.9882		5.53227	66.4819		13.5316	85.8372		6.53048	59.8821		14.5316	75.4677		7.53047	78.5007		15.5301	77.6209
0.532217	196.258		8.53315	124.02		1.53263	109.884		9.53237	74.4239		2.53223	75.3186		10.5315	63.8814		3.53202	74.6177		11.5327	63.5831		4.53242	85.0857		12.5325	71.0896		5.53318	75.0293		13.5332	70.2993		6.53221	72.4436		14.5331	71.537		7.53214	73.6664		15.5316	75.4259
0.533814	186.321		8.53489	110.516		1.53367	105.771		9.53348	83.0487		2.53341	69.5358		10.5332	63.8873		3.53341	76.7292		11.5345	65.6528		4.53374	78.0176		12.5342	62.3902		5.53477	77.4986		13.5347	74.904		6.53388	68.9334		14.5349	65.6707		7.53374	67.5794		15.5334	76.2222
0.534786	189.673		8.53641	107.563		1.53471	99.4366		9.53522	82.9473		2.53508	72.372		10.5345	63.1417		3.53521	82.6968		11.5357	67.6122		4.53464	74.9816		12.5357	78.6647		5.53644	73.559		13.5357	71.2238		6.53492	69.5179		14.5362	71.8829		7.53478	60.6008		15.5346	71.8173
0.535828	193.863		8.53738	107.468		1.53624	93.4034		9.53674	74.8205		2.53674	73.6753		10.5354	66.3269		3.5366	77.7849		11.5367	64.8774		4.53603	96.6332		12.5368	67.2305		5.53755	80.6569		13.5368	78.5753		6.53589	77.773		14.5371	80.4332		7.53582	71.3193		15.5355	78.3098
0.537633	177.084		8.53857	123.793		1.53797	96.5527		9.53772	86.037		2.53778	83.5259		10.5367	63.7889		3.5375	73.228		11.538	63.1716		4.53783	83.7347		12.5378	58.1941		5.53852	79.121		13.5385	76.9469		6.53756	76.9827		14.5385	91.0861		7.53749	75.8106		15.537	72.1334
0.5393	176.36		8.5403	129.624		1.53915	91.0473		9.53883	79.3149		2.53883	84.1015		10.5386	63.0612		3.53875	71.5817		11.5397	72.2647		4.53915	85.4704		12.5394	68.5517		5.54005	72.5182		13.5402	79.8964		6.5393	76.3445		14.5403	69.8221		7.53922	62.8584		15.5388	78.6498
0.540203	168.209		8.5419	124.372		1.54013	100.048		9.54042	85.5837		2.54042	83.2933		10.5399	66.801		3.54056	77.3167		11.5412	67.8956		4.54005	86.9317		12.5411	74.6744		5.54186	79.6877		13.5412	77.0423		6.54034	76.8097		14.5417	69.0259		7.54026	70.0309		15.54	72.9715
0.541105	183.058		8.54273	115.025		1.54158	97.9663		9.54216	92.4729		2.54216	73.7737		10.5409	67.4214		3.54209	74.5253		11.5421	79.6787		4.54144	96.7794		12.5424	74.9279		5.54311	82.3121		13.5423	83.0159		6.54117	67.4005		14.5426	65.1906		7.54124	86.3919		15.5409	74.1554
0.542703	183.988		8.5437	109.782		1.54339	105.392		9.54327	75.3156		2.54327	72.0738		10.5422	63.8426		3.54299	75.5214		11.5433	77.8535		4.54325	78.0533		12.5433	86.043		5.54401	69.8579		13.5439	74.1316		6.5427	64.4868		14.5439	76.6964		7.5429	87.1524		15.5424	72.2169
0.5443	172.169		8.54537	113.731		1.54464	105.267		9.54424	87.9159		2.54424	80.3736		10.544	67.6928		3.54424	85.1393		11.5451	64.0215		4.54464	79.965		12.5447	76.0552		5.5454	65.8109		13.5456	60.8632		6.54437	66.297		14.5457	76.5324		7.54471	82.4523		15.5442	76.0969
0.545411	176.479		8.5469	113.492		1.54554	96.4543		9.54577	85.0648		2.54584	78.3725		10.5454	63.4758		3.54605	77.773		11.5466	59.6972		4.5454	94.5337		12.5465	77.2272		5.5472	70.7824		13.5467	67.3259		6.54555	77.4509		14.5472	74.5879		7.54568	69.0974		15.5455	89.753
0.546453	174.749		8.54801	116.37		1.54693	93.5704		9.54751	79.461		2.54758	68.8201		10.5463	73.0222		3.5475	68.1401		11.5476	61.9249		4.54665	80.0545		12.5478	74.4626		5.54852	76.3504		13.5477	75.0263		6.54652	76.4578		14.5479	72.6792		7.54651	70.7377		15.5463	84.5548
0.54798	175.447		8.54905	114.87		1.54881	95.0436		9.54869	76.7471		2.54869	79.5952		10.5474	72.0947		3.54834	77.7014		11.5488	75.9806		4.54832	81.3757		12.5487	77.0394		5.54943	69.1273		13.5493	72.3959		6.54798	84.2089		14.5491	85.6881		7.54797	76.1208		15.5475	86.4874
0.549716	171.558		8.55058	108.762		1.55006	99.9048		9.54959	70.7407		2.54952	73.1385		10.549	73.1862		3.54938	84.686		11.5505	77.0066		4.54978	86.04		12.5501	70.6124		5.55082	65.7274		13.5511	75.4707		6.54971	74.1167		14.5508	70.8958		7.54971	71.9694		15.5493	77.5314
0.550967	173.854		8.55232	117.038		1.55082	102.35		9.55112	82.0795		2.55091	71.9217		10.5506	74.898		3.55105	81.8558		11.5521	73.1683		4.55075	103.824		12.5519	66.7235		5.55262	84.2476		13.5521	75.6436		6.5511	76.8395		14.5523	81.4234		7.55089	73.6842		15.5507	63.6547
0.551869	170.654		8.55357	129.57		1.55214	102.681		9.55299	94.1967		2.55258	70.8898		10.5516	82.4314		3.55264	93.5077		11.553	73.6425		4.55193	99.4575		12.5533	75.3901		5.55401	89.3146		13.553	66.8488		6.552	85.2646		14.5533	95.9234		7.55179	74.406		15.5516	68.4204
0.553258	164.225		8.55447	115.314		1.55388	97.8023		9.5541	80.5048		2.55383	74.2598		10.5527	70.7407		3.55368	84.0806		11.554	73.0132		4.55367	95.1033		12.554	70.4484		5.55484	76.1596		13.5544	69.1362		6.55332	68.6382		14.5544	81.2802		7.55318	85.5867		15.5528	83.8301
0.555064	170.768		8.55593	118.61		1.5552	97.3072		9.55487	79.4819		2.5548	74.2002		10.5543	71.6861		3.55473	73.5739		11.5556	66.9024		4.55526	91.3247		12.5553	65.7632		5.55595	68.6203		13.5561	77.7909		6.55506	63.1775		14.5561	87.4984		7.55499	82.1391		15.5546	90.3644
0.556383	187.445		8.55773	116.442		1.55617	108.097		9.55626	88.238		2.55612	78.6588		10.556	61.8355		3.55632	85.3302		11.5572	76.2043		4.5563	86.4933		12.557	63.261		5.55769	85.6762		13.5573	78.1697		6.55652	73.5292		14.5578	81.2146		7.55638	72.7806		15.5562	83.6929
0.557286	182.646		8.55905	121.044		1.55735	99.7378		9.55799	89.3116		2.55792	75.5243		10.5571	63.6815		3.55806	91.2054		11.5583	82.7475		4.55735	79.6549		12.5583	66.5804		5.55915	83.4513		13.5583	64.454		6.55749	69.9772		14.5589	85.36		7.55735	76.1715		15.5572	71.5817
0.558675	193.079		8.55989	120.647		1.55908	102.285		9.55931	81.1102		2.55938	71.2775		10.5581	70.8719		3.55924	81.2564		11.5592	60.7469		4.55894	88.1932		12.5593	72.6046		5.56012	76.2103		13.5596	65.4292		6.55867	71.0449		14.5599	73.9586		7.55853	81.6441		15.5582	67.1261
0.56055	182.649		8.56127	125.94		1.56068	100.71		9.56022	77.0215		2.56028	76.3564		10.5596	65.2353		3.56021	78.3397		11.5608	62.5512		4.56068	104.858		12.5606	70.4723		5.56123	84.7248		13.5614	71.695		6.56048	67.8001		14.5614	77.0841		7.56033	77.9281		15.5599	75.7421
0.561869	159.453		8.56315	127.697		1.56165	104.724		9.56153	80.0873		2.56146	75.8106		10.5614	70.2576		3.56167	69.4583		11.5626	66.9621		4.56179	98.0946		12.5622	71.5429		5.5629	74.1554		13.5628	66.816		6.562	62.1069		14.5631	77.3823		7.56186	72.6046		15.5616	80.1797
0.562633	159.25		8.56447	122.791		1.56276	98.0558		9.56327	91.1577		2.56327	76.6457		10.5626	68.0596		3.56348	90.2749		11.5638	72.7269		4.56276	86.7587		12.5638	70.9017		5.56457	76.9588		13.5638	76.8813		6.56284	73.3562		14.5643	75.1366		7.56276	66.139		15.5626	84.9216
0.563883	165.155		8.56523	131.753		1.56443	93.2035		9.5648	88.4229		2.5648	72.6703		10.5635	62.0442		3.56473	95.0138		11.5647	71.1731		4.56436	96.6183		12.5649	59.4347		5.56568	89.3772		13.565	72.1066		6.56388	73.3651		14.5653	69.7685		7.56401	63.3028		15.5636	84.4952
0.56555	174.03		8.56648	128.165		1.5661	97.2297		9.56577	84.2297		2.56577	73.6962		10.565	72.8432		3.56563	80.9909		11.5661	64.8566		4.5661	92.0166		12.5659	68.2266		5.56665	82.5119		13.5668	68.9871		6.56562	71.1045		14.5668	85.7179		7.56582	64.788		15.5653	76.2401
0.566939	177.075		8.56815	128.41		1.56714	107.891		9.56688	96.9523		2.56695	70.7139		10.5668	81.7007		3.56709	82.9593		11.5679	62.3007		4.56721	81.0416		12.5676	74.4388		5.56825	77.4241		13.5683	74.8384		6.56714	73.3144		14.5686	89.9468		7.56735	67.1887		15.567	77.2153
0.56798	171.934		8.56961	137.9		1.56818	97.4832		9.56862	90.2123		2.56869	73.5978		10.568	63.4847		3.56889	80.8001		11.5692	69.7535		4.56797	81.0715		12.5692	81.8946		5.56998	68.3489		13.5693	71.1344		6.56812	81.3399		14.5697	89.6844		7.56818	75.1873		15.568	78.8168
0.569092	185.626		8.57058	136.379		1.56985	92.1299		9.57022	78.617		2.57028	74.3493		10.5688	67.5228		3.57014	76.2938		11.5702	67.9522		4.56943	84.7576		12.5703	83.7675		5.57109	84.0418		13.5704	66.6042		6.56923	75.8464		14.5705	73.7648		7.56922	75.0501		15.5689	78.0981
0.570758	186.124		8.57169	131.503		1.57158	100		9.57126	81.4025		2.57119	79.8189		10.5702	66.1449		3.57091	82.3419		11.5715	62.6884		4.57117	87.904		12.5713	79.6549		5.572	84.7934		13.5722	69.8669		6.57082	75.8285		14.5719	81.9005		7.57082	82.7893		15.5703	68.3071
0.572425	181.009		8.57336	118.634		1.57256	104.202		9.5723	79.9531		2.57216	75.244		10.5718	61.9339		3.57223	79.4908		11.5733	59.7747		4.57235	75.4021		12.573	76.2997		5.57359	76.2968		13.5738	81.0893		6.57256	68.0715		14.5736	80.5943		7.57235	82.9593		15.5721	71.7159
0.573467	179.885		8.57502	130.733		1.57346	106.91		9.57403	81.7246		2.57376	75.3782		10.5731	69.9206		3.57396	76.6755		11.5747	60.7111		4.57332	79.2791		12.5747	65.9153		5.5754	78.2383		13.5747	76.8694		6.57367	79.1329		14.5749	88.6973		7.57339	84.6562		15.5732	70.3828
0.574508	176.616		8.57607	135.308		1.57499	100.131		9.5757	87.9666		2.57535	79.9531		10.5741	68.2355		3.57528	77.3793		11.5755	73.2458		4.57471	95.4731		12.5758	66.974		5.57651	86.711		13.5757	79.4312		6.57457	83.3917		14.5758	96.9672		7.57443	71.5907		15.5741	72.035
0.576106	181.203		8.57711	132.91		1.57658	95.5745		9.5766	90.7252		2.57646	85.2199		10.5754	71.868		3.57625	73.395		11.5767	75.8941		4.57651	94.2026		12.5766	64.4331		5.57734	82.5417		13.5773	77.7909		6.5761	87.4417		14.5772	91.0056		7.57603	75.8315		15.5756	60.0729
0.577842	169.441		8.57877	130.175		1.57776	97.5786		9.57751	84.9067		2.57744	80.2454		10.5772	68.2326		3.57743	71.5071		11.5784	77.2899		4.5779	80.472		12.5781	64.8655		5.57873	81.7007		13.5789	80.3139		6.57791	77.2332		14.579	85.3213		7.57776	75.4557		15.5773	68.5368
0.578953	171.466		8.58044	144.38		1.57874	90.6238		9.5791	73.3562		2.57896	74.1525		10.5786	73.0102		3.57917	82.2882		11.5798	77.263		4.5788	97.6263		12.5797	71.4177		5.58047	76.3385		13.5799	75.074		6.57909	73.049		14.5804	87.7608		7.57894	65.8706		15.5787	73.3472
0.579925	181.2		8.58155	140.259		1.5802	96.0278		9.5807	80.4899		2.58077	77.1408		10.5796	80.9969		3.58077	77.6984		11.5808	65.8467		4.58005	76.0254		12.5809	66.0853		5.58172	68.5606		13.5809	71.701		6.57999	80.5973		14.5814	81.817		7.57985	62.3633		15.5797	68.9125
0.581522	169.939		8.58252	151.872		1.58193	95.9085		9.58188	91.6348		2.58195	76.6755		10.5808	78.4768		3.58181	75.3126		11.582	73.6842		4.58186	73.5053		12.5819	61.2718		5.58269	66.3567		13.5825	65.7364		6.58152	79.7085		14.5826	79.3507		7.58137	75.8434		15.5809	70.4067
0.583258	174.851		8.58412	137.873		1.58332	108.312		9.58285	94.6112		2.58285	84.3013		10.5824	74.7788		3.58285	79.6042		11.5836	70.8898		4.58339	82.9891		12.5833	62.42		5.58401	73.5292		13.5843	73.2309		6.58332	69.2913		14.5843	84.698		7.58318	65.7483		15.5828	75.3603
0.5843	168.459		8.58593	136.728		1.58422	98.8312		9.58431	75.7838		2.58431	75.8643		10.584	81.5963		3.58459	79.5117		11.5852	76.0462		4.58429	87.2956		12.5851	73.9377		5.58575	78.2621		13.5855	81.0148		6.58457	54.6779		14.5859	87.6952		7.58443	66.6907		15.5842	73.6783
0.585133	178.907		8.58697	133.274		1.58547	84.4713		9.58612	87.6296		2.58612	71.0628		10.5851	83.0845		3.58625	77.2779		11.5863	77.6209		4.58547	79.9382		12.5865	72.5241		5.58727	80.8866		13.5864	77.5255		6.58534	66.98		14.5869	91.4947		7.58533	73.899		15.5852	68.4055
0.586592	185.858		8.58773	137.208		1.58728	103.865		9.58737	81.1639		2.58744	70.3083		10.5861	81.146		3.5873	76.258		11.5873	80.2006		4.58728	90.1318		12.5874	60.1624		5.58818	72.4018		13.5879	77.8625		6.58666	71.1761		14.5879	82.2137		7.58679	78.1607		15.5864	75.4259
0.588258	187.594		8.58919	127.796		1.58874	108.3		9.58827	81.7425		2.58834	74.0541		10.5879	70.6154		3.58827	78.9689		11.589	71.0568		4.58881	93.3765		12.5886	66.8935		5.58936	73.0848		13.5897	78.6528		6.58839	77.433		14.5897	80.4094		7.5886	74.8563		15.5882	86.3442
0.589439	170.004		8.59093	141.988		1.58964	109.717		9.58966	80.5585		2.58966	72.8283		10.5895	71.4415		3.59	85.5628		11.5906	69.9683		4.58971	78.7423		12.5904	63.2282		5.59116	74.1048		13.591	78.0951		6.58971	66.0406		14.5913	76.264		7.58985	73.055		15.5898	84.3759
0.590411	161.564		8.59211	141.165		1.59089	95.1719		9.59147	77.5493		2.59153	74.2449		10.5904	75.9806		3.59167	74.1912		11.5917	76.5085		4.59068	77.8923		12.5919	56.184		5.59269	79.1479		13.5918	68.8976		6.59068	69.6641		14.5922	78.4232		7.59061	58.9158		15.5906	78.9868
0.5918	165.334		8.59308	137.751		1.59269	86.216		9.59285	76.0105		2.59292	73.6097		10.5913	68.9424		3.59264	79.9173		11.5928	67.3319		4.59235	91.271		12.5928	70.2426		5.59366	78.8109		13.5932	59.6107		6.59194	61.7788		14.5932	68.322		7.59193	66.6907		15.5916	79.6549
0.593605	184.65		8.59447	134.679		1.59415	96.7167		9.59376	72.5301		2.59369	80.6509		10.5929	64.3943		3.59355	82.8728		11.5944	73.4158		4.59394	82.8549		12.594	66.8338		5.59484	81.8976		13.5951	69.0259		6.59367	64.0633		14.5948	72.7746		7.59367	73.0222		15.5933	68.4204
0.594994	182.897		8.5962	145.299		1.59499	93.3079		9.59501	81.4681		2.59487	90.3763		10.5945	72.9297		3.59507	81.826		11.5961	69.8192		4.59499	84.8023		12.5959	75.2798		5.59658	87.728		13.5964	70.7616		6.5952	65.6469		14.5964	68.1013		7.59499	71.5728		15.5949	65.2264
0.595967	172.697		8.59759	139.036		1.5961	100.862		9.59681	91.5245		2.5966	86.6782		10.5956	70.5886		3.59674	85.8014		11.5972	80.815		4.59603	99.8154		12.5974	70.0965		5.59818	91.3277		13.5972	78.277		6.59617	71.021		14.5975	72.4078		7.59596	79.2105		15.5959	71.5012
0.597147	181.298		8.59857	162.146		1.59776	96.7585		9.5982	78.1577		2.59799	76.1954		10.5966	71.7726		3.59785	83.6213		11.598	69.3897		4.59756	91.617		12.5982	75.0382		5.59908	86.0639		13.5984	65.3606		6.59728	68.4711		14.5985	79.3328		7.59714	79.2433		15.597	70.9495
0.598883	179.816		8.59982	152.901		1.59929	87.6624		9.59903	87.5163		2.59896	73.058		10.5981	70.174		3.59882	89.3563		11.5995	79.8636		4.59929	93.2095		12.5992	71.0002		5.60005	75.8554		13.6001	68.7545		6.59902	72.5122		14.6	75.414		7.59888	73.2757		15.5986	74.3911
0.600411	192.542		8.60155	135.976		1.60033	95.3985		9.60015	85.5539		2.60014	73.9676		10.5999	80.5197		3.60028	87.9666		11.6011	83.5617		4.60054	93.4928		12.6009	50.3714		5.60165	76.5413		13.6015	69.5299		6.60068	82.5895		14.6018	85.8283		7.60047	61.0422		15.6003	78.4172
0.601383	194.415		8.60308	149.438		1.60138	107.683		9.60188	74.6684		2.60181	81.8051		10.6012	72.0231		3.60209	87.895		11.6023	86.1832		4.60144	99.6901		12.6025	52.0326		5.60332	67.2424		13.6025	63.8664		6.60166	60.2459		14.6031	81.7604		7.60151	62.426		15.6015	74.3046
0.602564	199.977		8.60405	141.851		1.60297	108.205		9.60334	81.48		2.60341	82.9593		10.6021	68.4085		3.60341	77.8595		11.6033	80.1261		4.6029	76.9558		12.6035	69.0259		5.60436	62.7332		13.6037	63.6249		6.6027	71.1493		14.604	78.277		7.60256	82.9444		15.6025	74.1554
0.6043	207.999		8.60516	130.975		1.60471	104.903		9.60431	78.0623		2.60445	74.5103		10.6035	58.9068		3.60431	69.0378		11.6047	60.1892		4.60471	73.1415		12.6046	69.5269		5.6054	73.052		13.6054	65.2443		6.60443	64.7522		14.6053	85.5658		7.60429	67.2722		15.6039	72.4257
0.605897	207.928		8.60697	126.337		1.60582	88.7211		9.60542	68.838		2.60549	67.5735		10.6053	64.6269		3.60563	87.3642		11.6065	72.0529		4.60603	76.6278		12.6062	62.5542		5.607	74.5998		13.607	64.7432		6.6061	69.6044		14.6072	77.2839		7.60596	69.3062		15.6057	86.8452
0.6068	178.119		8.60857	121.813		1.60679	88.4974		9.60709	74.8175		2.60716	80.806		10.6066	67.8985		3.60743	67.5586		11.6079	64.8774		4.60686	86.1653		12.6079	72.1931		5.60873	69.5597		13.608	62.9538		6.60707	71.2865		14.6085	82.4374		7.607	61.7758		15.6069	81.656
0.607772	168.671		8.6094	152.161		1.60825	99.7408		9.60876	79.8845		2.60889	84.6532		10.6075	74.2956		3.60889	62.6825		11.6088	71.7964		4.60832	79.294		12.609	72.2408		5.60998	83.177		13.6091	61.1495		6.60798	67.5198		14.6094	83.4901		7.60797	67.4035		15.6078	76.7978
0.609369	188.891		8.61044	138.096		1.61006	104		9.60987	84.9872		2.61001	71.4535		10.6089	67.3826		3.6098	67.8598		11.61	68.8767		4.61019	91.1696		12.61	74.4895		5.61089	70.7019		13.6107	72.6881		6.60957	65.963		14.6108	83.2814		7.60964	69.2406		15.6094	72.1185
0.610967	187.955		8.61211	136.054		1.61131	99.869		9.61084	80.3766		2.61098	65.1995		10.6107	65.0295		3.61105	77.952		11.6117	62.5453		4.61144	91.2889		12.6115	73.9527		5.61234	71.8352		13.6125	78.9719		6.61124	71.7487		14.6126	74.8861		7.61137	77.8923		15.6112	67.0068
0.612078	182.262		8.61364	131.043		1.61221	97.9156		9.61244	81.0953		2.61258	68.1819		10.612	73.9079		3.61292	66.0316		11.6133	56.1363		4.61221	98.5031		12.6133	79.3447		5.61408	77.9281		13.6135	68.8141		6.61235	71.5757		14.614	85.697		7.61242	77.7999		15.6124	60.5561
0.613119	188.647		8.61461	136.954		1.61367	102.237		9.61417	88.2469		2.61438	71.9843		10.6129	73.4844		3.61438	76.249		11.6142	72.3959		4.61346	93.6926		12.6145	74.4537		5.6154	85.9476		13.6145	58.5251		6.61332	66.4521		14.6147	79.0196		7.61325	68.9811		15.6132	69.509
0.614647	179.652		8.61565	136.522		1.61554	99.702		9.61535	88.8464		2.61542	70.4186		10.614	72.1483		3.61514	85.703		11.6154	76.9618		4.61519	86.3949		12.6154	67.141		5.6163	79.5087		13.6162	63.2193		6.61478	73.5143		14.6159	74.6326		7.61478	58.883		15.6145	77.7641
0.616383	166.023		8.61725	136.259		1.61672	105.303		9.61626	90.5642		2.61626	81.5576		10.6158	74.1018		3.61625	95.1629		11.6172	70.2307		4.61658	88.405		12.6169	68.6561		5.61769	68.7097		13.6179	72.6852		6.61659	75.4885		14.6176	73.2757		7.61644	75.1486		15.6162	70.7019
0.617633	178.015		8.61898	120.095		1.61749	99.6454		9.61779	89.4339		2.61771	83.6959		10.6172	76.9141		3.61792	92.1001		11.6188	56.1542		4.61756	90.1258		12.6187	82.1332		5.61957	78.3546		13.6189	74.0153		6.61791	73.5292		14.6191	81.0058		7.61762	77.6209		15.6175	77.0304
0.618536	182.13		8.62016	131.383		1.61881	99.1056		9.61959	89.6098		2.61938	86.6693		10.6182	72.3064		3.61938	82.7356		11.6196	64.0006		4.61874	84.1432		12.62	73.4397		5.62089	72.6941		13.6198	77.3525		6.61881	76.4518		14.6201	81.2951		7.6186	60.1326		15.6185	75.5124
0.619994	172.339		8.62113	117.697		1.62054	97.3728		9.6207	90.4568		2.62056	81.146		10.6193	67.0814		3.62042	89.0283		11.6206	64.6597		4.62047	79.0763		12.6208	60.4576		5.62165	66.0525		13.6213	71.2089		6.6202	72.8045		14.6212	75.7957		7.61999	64.5255		15.6198	80.9015
0.621731	166.097		8.62259	123.593		1.62186	94.4323		9.62146	72.1424		2.62153	72.4764		10.621	75.1665		3.62153	78.6886		11.6223	71.9903		4.62207	88.4676		12.6221	67.0456		5.6229	78.9093		13.6229	68.1998		6.622	68.0298		14.6229	80.4183		7.62179	73.562		15.6214	70.8421
0.62305	164.296		8.6244	137.157		1.62283	93.9581		9.62292	66.7891		2.62292	68.5099		10.6227	77.3286		3.6232	78.611		11.6238	64.1826		4.62304	75.5333		12.6237	69.5627		5.62457	83.5975		13.6241	68.4085		6.62339	69.4613		14.6246	88.2738		7.62311	72.7955		15.623	71.877
0.623953	190.669		8.62565	136.677		1.62408	94.9393		9.62466	68.3727		2.62466	79.1628		10.6238	72.3482		3.62487	66.6817		11.6249	65.3009		4.62415	79.0972		12.6251	72.2915		5.62602	69.9951		13.625	68.2594		6.6243	68.322		14.6256	86.9198		7.62401	74.3493		15.624	76.9857
0.625342	174.526		8.62655	121.303		1.62582	84.9187		9.62591	75.6078		2.62605	76.3534		10.6247	71.8292		3.62598	77.606		11.626	62.8823		4.62582	98.4912		12.626	75.9836		5.627	63.8008		13.6265	70.4693		6.62562	78.0504		14.6266	90.9668		7.62533	75.912		15.6251	69.6551
0.627217	175.531		8.62801	128.031		1.62735	99.1771		9.62688	75.1456		2.62702	71.5459		10.6263	72.2199		3.62695	80.5674		11.6275	60.7171		4.62749	90.9161		12.6273	77.7223		5.62811	77.5106		13.6283	69.1004		6.62742	76.1297		14.6283	95.6341		7.62714	80.9492		15.6269	63.0314
0.628467	181.292		8.62982	113.826		1.62832	89.5234		9.6282	76.9201		2.62827	72.1126		10.6281	74.5342		3.62848	77.8088		11.6292	73.6992		4.6286	93.9611		12.629	69.5448		5.62984	85.2914		13.6297	78.5603		6.62888	66.7951		14.63	86.1951		7.6286	81.9602		15.6284	66.139
0.62923	170.613		8.63107	127.858		1.62943	87.7161		9.62994	90.0035		2.63001	76.8276		10.6292	75.8494		3.63028	76.8694		11.6304	72.6196		4.62957	86.8273		12.6306	71.1731		5.63151	74.9398		13.6306	82.84		6.62964	65.7393		14.6311	84.7278		7.6295	91.945		15.6295	77.0364
0.63048	178.319		8.6319	142.865		1.63117	86.9615		9.6314	81.647		2.63153	78.5991		10.6302	75.4557		3.63146	79.4938		11.6314	72.2468		4.63124	83.0249		12.6315	77.3078		5.63255	86.6782		13.6318	92.9411		6.63082	69.1988		14.6321	79.0733		7.63075	77.3823		15.6305	70.6333
0.632217	181.972		8.63315	138.398		1.63276	92.4788		9.63237	87.4835		2.63251	67.6808		10.6317	64.782		3.63243	83.3231		11.6329	73.3353		4.63297	71.5668		12.6326	63.2551		5.63359	88.3811		13.6336	88.9597		6.63256	74.4537		14.6337	79.7503		7.63256	72.8313		15.6322	67.484
0.633675	187.436		8.63489	127.649		1.63381	96.6929		9.63355	78.7154		2.63369	71.7905		10.6335	70.0398		3.63396	89.079		11.6346	62.8524		4.63401	81.2116		12.6344	73.2011		5.63519	84.3013		13.6351	73.2578		6.63402	76.8276		14.6355	79.0017		7.63408	69.9951		15.6339	77.7462
0.634647	182.763		8.6362	118.374		1.63485	86.3651		9.63528	75.1128		2.63542	79.2672		10.6346	62.596		3.63577	87.9755		11.6359	64.615		4.63485	84.018		12.636	63.4817		5.63693	76.6517		13.636	64.9371		6.63499	69.2048		14.6365	77.9191		7.63485	89.0223		15.6349	71.194
0.635828	189.404		8.63718	137.243		1.63658	90.3047		9.63688	82.9742		2.63702	68.4771		10.6354	57.1234		3.63688	88.065		11.6368	76.2669		4.63631	89.4667		12.6371	62.8882		5.63797	77.8535		13.6373	72.6106		6.6361	63.1358		14.6373	81.4234		7.63596	89.5055		15.6357	65.0594
0.637494	183.532		8.63843	138.696		1.63825	96.5378		9.63785	77.272		2.63792	71.3401		10.6368	63.947		3.63764	81.0446		11.6382	76.0433		4.63804	83.1859		12.6381	74.8116		5.63894	80.2573		13.6391	68.4264		6.63777	60.2459		14.6387	85.6583		7.63762	73.3622		15.6373	73.7349
0.639092	185.244		8.64016	126.352		1.63922	88.8016		9.63897	70.6989		2.63889	79.3119		10.6386	62.8077		3.63903	72.0857		11.6401	76.264		4.63922	75.2738		12.6398	69.9295		5.64061	83.8182		13.6405	77.2541		6.63944	69.8311		14.6405	89.1476		7.63915	86.893		15.6389	73.7588
0.640133	188.823		8.64176	134.029		1.64013	90.6358		9.6407	72.1931		2.64049	79.3029		10.6398	65.3815		3.6407	74.4716		11.6413	78.3635		4.64012	85.697		12.6415	78.7572		5.64234	81.9244		13.6414	71.6921		6.64055	71.367		14.6417	82.9205		7.64019	84.6234		15.6401	77.4628
0.641244	171.033		8.64273	136.28		1.64165	95.6789		9.6423	75.4528		2.64209	83.7436		10.6408	69.3271		3.64202	72.0171		11.6421	76.4578		4.64151	82.8758		12.6424	62.2769		5.64339	81.5039		13.6425	59.3721		6.64159	73.0162		14.6426	73.3771		7.64124	78.1368		15.6411	77.6716
0.642842	179.074		8.64377	129.901		1.64332	85.6165		9.6432	71.3431		2.6432	75.3007		10.6421	72.0827		3.64299	72.0171		11.6434	76.7739		4.64332	97.0299		12.6433	65.0922		5.64422	83.4782		13.6441	68.489		6.64312	68.1669		14.644	76.8902		7.64283	75.4319		15.6425	79.7861
0.644508	177.35		8.64551	134.703		1.64443	84.3639		9.64417	70.4693		2.64424	69.5657		10.6439	68.4145		3.64431	79.7771		11.6452	71.0986		4.64471	92.7174		12.6449	69.6074		5.64568	76.4787		13.6457	83.6094		6.64485	70.3679		14.6458	77.4479		7.64457	68.4652		15.6444	87.7668
0.645619	182.9		8.64718	134.115		1.6454	108.747		9.64577	81.0148		2.64577	77.6418		10.6454	66.807		3.64605	85.4763		11.6465	70.8003		4.64561	86.0221		12.6465	79.2254		5.64741	71.7308		13.6467	77.612		6.64603	63.4012		14.6472	85.709		7.64568	84.2089		15.6457	75.3872
0.646592	182.315		8.64822	117.316		1.64686	102.974		9.64737	86.1533		2.64751	81.0446		10.6463	77.0244		3.6475	77.7641		11.6474	63.1507		4.64693	98.8103		12.6477	74.4746		5.64859	70.7258		13.6477	81.6023		6.64693	66.2493		14.6481	87.2031		7.64665	82.5775		15.6466	67.7136
0.648258	169.682		8.64919	139.811		1.64867	89.9379		9.64841	84.5846		2.64869	73.6962		10.6474	68.8559		3.64848	77.2869		11.6487	62.4946		4.64867	88.8702		12.6487	70.2605		5.64957	79.6698		13.6493	67.7256		6.64846	72.4406		14.6494	84.7337		7.64818	71.7099		15.6479	73.1176
0.649925	165.993		8.65093	133.942		1.64992	90.4956		9.64945	86.3949		2.64966	70.4663		10.6492	80.1768		3.64966	80.5734		11.6504	65.0027		4.65019	84.6353		12.6501	68.2833		5.65096	83.0338		13.6511	62.6556		6.65034	68.0566		14.6511	85.7477		7.64999	63.5384		15.6497	67.6629
0.650967	168.862		8.65266	131.031		1.65082	88.8344		9.65098	86.887		2.65112	77.4569		10.6507	79.2015		3.65139	82.6849		11.652	69.7565		4.6511	88.2439		12.6519	68.2862		5.65276	81.1072		13.6522	75.5542		6.65145	69.4523		14.6526	89.9111		7.65117	64.609		15.6512	73.7677
0.6518	175.835		8.65364	129.573		1.65221	92.8964		9.65271	72.8283		2.65285	74.1823		10.6517	80.8657		3.65299	90.4658		11.6529	73.383		4.65235	82.3837		12.6532	67.4691		5.65415	71.7547		13.6532	78.0325		6.65228	83.9941		14.6536	84.2685		7.65207	84.1224		15.6521	71.0151
0.653328	177.144		8.65447	140.608		1.65401	104.325		9.65397	70.2486		2.65417	67.0158		10.6529	74.8712		3.65403	81.3846		11.654	70.7317		4.65415	96.1471		12.6541	64.7045		5.65512	73.6246		13.6546	69.2704		6.65367	79.1568		14.6548	82.1928		7.6536	72.4943		15.6533	76.3087
0.654994	178.447		8.656	126.865		1.6554	107.847		9.65487	77.5523		2.65508	79.6549		10.6546	70.9793		3.65507	77.0602		11.6557	73.0669		4.65561	105.75		12.6554	64.6597		5.65637	73.4904		13.6564	70.3291		6.65534	76.258		14.6566	86.0698		7.6554	61.6118		15.6552	75.4319
0.656175	191.531		8.65766	134.553		1.65631	85.9118		9.65633	74.0839		2.65646	81.5456		10.6562	74.9577		3.65681	73.5799		11.6574	67.9224		4.65644	102.693		12.6572	79.5505		5.65811	73.1623		13.6578	70.4723		6.65666	68.161		14.6581	88.7808		7.65658	70.2904		15.6566	72.6166
0.657147	163.223		8.65877	128.419		1.65756	90.6716		9.65813	72.8969		2.65834	82.1898		10.6571	80.7613		3.65848	70.0846		11.6584	67.1559		4.65756	90.0811		12.6587	74.6684		5.65964	84.7099		13.6587	69.2555		6.65756	72.2378		14.659	77.1587		7.65742	70.6632		15.6574	70.1502
0.658606	171.779		8.65982	128.082		1.65943	92.2403		9.65945	69.7446		2.65959	81.5665		10.6581	79.5207		3.65938	70.2993		11.6594	63.3147		4.65922	77.8595		12.6596	85.4614		5.66054	82.163		13.66	70.4604		6.65888	82.9384		14.66	77.7014		7.65874	72.8731		15.6585	72.0887
0.660342	181.862		8.6612	134.962		1.66082	93.3616		9.66035	73.4546		2.66035	81.7663		10.6597	83.9583		3.66028	66.7086		11.6611	65.3636		4.66075	84.4862		12.6608	80.6062		5.66179	74.9666		13.6619	72.9088		6.66061	67.7136		14.6616	86.7349		7.66047	82.5924		15.6603	70.8302
0.66173	206.544		8.66294	137.497		1.66165	95.0347		9.66174	77.0602		2.66167	73.7021		10.6613	65.3695		3.66188	74.0749		11.6628	67.8806		4.66179	78.9123		12.6627	70.6572		5.66359	70.7705		13.6632	69.8609		6.66214	64.4659		14.6632	91.1219		7.66179	77.266		15.6618	84.7815
0.662633	188.608		8.66433	125.538		1.66276	85.8521		9.66355	85.2646		2.66341	76.929		10.6624	62.0741		3.66355	82.6431		11.6638	79.2522		4.66283	75.8643		12.6642	72.718		5.66512	72.6196		13.6639	71.7905		6.66305	68.7843		14.6643	79.3268		7.66276	82.7654		15.6628	70.4156
0.663953	168.752		8.66523	116.323		1.6645	83.7406		9.66487	86.3949		2.66473	74.8802		10.6633	62.6556		3.66466	87.4656		11.6647	75.6168		4.66443	77.5523		12.6649	66.5505		5.66596	78.0623		13.6653	72.6166		6.66423	64.5703		14.6653	77.5523		7.66401	81.1222		15.6639	71.1582
0.665689	174.728		8.66655	126.963		1.66596	83.5647		9.66563	88.9746		2.6657	70.52		10.6649	73.2757		3.66563	82.4523		11.6662	73.8095		4.66617	85.363		12.666	74.1972		5.667	70.9256		13.6669	77.1676		6.66603	65.0773		14.6669	83.5915		7.66575	76.7173		15.6655	76.8843
0.667147	200.001		8.66829	119.278		1.667	83.6064		9.66688	73.8632		2.66688	67.6987		10.6667	71.6264		3.66709	77.9191		11.6679	63.9231		4.66735	93.8149		12.6677	66.8756		5.66859	80.2454		13.6682	74.9309		6.66756	69.6939		14.6686	78.7363		7.66728	66.3388		15.6673	78.96
0.668119	195.461		8.66982	131.362		1.66811	91.8794		9.66855	67.3707		2.66862	65.5216		10.6679	69.0915		3.66882	86.0609		11.669	66.7861		4.66832	84.4773		12.6692	63.8963		5.67026	79.9262		13.6692	71.9247		6.66853	61.5909		14.6699	74.0123		7.66825	66.4133		15.6684	79.0673
0.6693	189.703		8.67072	136.686		1.66971	85.6284		9.67001	77.7342		2.67021	70.0518		10.6688	66.6251		3.67014	76.7024		11.67	68.8887		4.66978	87.2926		12.6702	66.0107		5.6713	69.8997		13.6705	76.6308		6.66964	53.8995		14.6708	81.0953		7.66936	63.6457		15.6693	75.3573
0.671105	176.115		8.67197	128.076		1.67138	88.4259		9.67098	78.7989		2.67119	75.071		10.6702	65.9063		3.67105	76.2252		11.6715	62.5065		4.67158	93.3169		12.6713	74.6147		5.67234	71.6473		13.6722	71.5071		6.67138	62.6705		14.6722	96.8778		7.6711	65.7841		15.6708	81.5427
0.672633	181.647		8.67377	127.381		1.67249	93.2423		9.67216	70.8809		2.6723	75.0919		10.672	60.6366		3.67243	84.2924		11.6732	80.642		4.67283	96.7734		12.673	70.5051		5.67387	77.8744		13.6738	65.3457		6.67305	62.7361		14.674	91.5543		7.67269	65.2383		15.6726	76.1894
0.673467	181.421		8.6753	143.864		1.67353	92.115		9.67383	73.1176		2.67396	71.0508		10.6733	68.5785		3.67424	79.5803		11.6746	77.8356		4.67374	93.6449		12.6747	60.899		5.67568	78.0802		13.6748	65.2204		6.67395	61.5671		14.6753	79.628		7.67374	65.4113		15.6738	67.2842
0.674508	183.335		8.67607	150.736		1.67506	91.7333		9.67549	83.4871		2.67563	68.7962		10.6742	72.2378		3.67563	68.3399		11.6755	73.4516		4.67519	90.7252		12.6758	68.659		5.67686	75.9001		13.6758	78.9421		6.67485	70.7377		14.6762	78.3963		7.67478	73.1415		15.6748	72.038
0.676175	179.187		8.67718	140.548		1.67679	98.1393		9.67653	77.7611		2.67667	67.8478		10.6756	66.3895		3.67653	73.902		11.6767	74.0809		4.677	91.0771		12.6767	77.3376		5.67776	69.1004		13.6775	68.2952		6.67645	74.1912		14.6776	93.7284		7.67651	81.9483		15.6762	74.898
0.677703	193.269		8.67884	130.966		1.67797	79.8099		9.67751	70.8868		2.67771	75.9269		10.6774	76.8515		3.67785	74.2628		11.6786	81.9363		4.67825	84.8858		12.6783	62.1367		5.67922	77.9549		13.6792	68.2773		6.67805	69.7714		14.6795	101.351		7.67818	81.8469		15.678	74.2211
0.678744	199.547		8.6803	139.48		1.67888	77.3316		9.67917	65.7125		2.67938	72.8552		10.6788	69.3599		3.67966	63.3565		11.68	69.3062		4.67901	94.471		12.6801	69.8907		5.68102	67.4572		13.6803	66.3537		6.67916	82.0347		14.6808	82.2197		7.67915	73.4397		15.6792	74.406
0.679786	192.592		8.68134	144.956		1.6804	85.2855		9.68091	81.5069		2.68112	80.1499		10.6796	62.1665		3.68105	78.1428		11.6809	65.4978		4.68033	87.9517		12.6812	77.2869		5.68234	72.7359		13.6813	74.3344		6.6802	80.9074		14.6815	79.6489		7.68006	76.3773		15.68	70.7109
0.681383	176.297		8.68246	149.423		1.68221	87.6564		9.68195	81.2623		2.68209	83.2933		10.6808	66.1241		3.68188	88.7748		11.6822	73.9228		4.68207	91.0354		12.6822	77.4181		5.68318	76.8008		13.683	75.6585		6.68173	78.6349		14.6828	74.8175		7.68158	65.9511		15.6814	72.4645
0.683119	192.679		8.68405	148.081		1.68339	86.9765		9.68292	85.0379		2.68299	83.5677		10.6824	70.6303		3.68299	86.3054		11.684	64.0305		4.68339	86.6305		12.6837	80.1708		5.68464	73.0639		13.6847	63.3415		6.68346	79.5803		14.6845	80.3557		7.68325	69.008		15.6831	67.4273
0.6843	203.546		8.68572	147.184		1.68415	91.4708		9.68452	98.6821		2.68445	73.7976		10.6839	69.7356		3.68473	74.4239		11.6854	66.0376		4.68436	101.354		12.6855	81.2236		5.68651	65.7632		13.6857	67.8896		6.68471	73.222		14.6859	76.7441		7.68436	78.5753		15.6844	71.1165
0.685203	177.836		8.68683	140.115		1.68554	80.5018		9.68633	88.2559		2.68619	77.099		10.6849	62.1874		3.68618	75.7659		11.6863	71.5101		4.68561	101.28		12.6867	76.8246		5.68776	77.6567		13.6865	78.6975		6.68569	82.3867		14.6869	83.0129		7.6854	71.0091		15.6853	65.3218
0.686661	177.326		8.6878	130.954		1.68728	75.2708		9.68737	82.0944		2.68737	66.2732		10.6861	71.9784		3.68716	83.7198		11.6874	61.91		4.68728	94.9393		12.6874	75.8405		5.68852	72.876		13.688	82.2405		6.68707	69.5627		14.6881	78.9331		7.68686	64.4957		15.6866	78.45
0.688467	186.476		8.68933	148.913		1.68853	84.2625		9.68813	75.2798		2.68827	65.793		10.6877	82.2525		3.68827	66.5595		11.689	68.155		4.68887	89.8693		12.6888	73.0102		5.68977	75.3186		13.6897	71.3073		6.68888	64.3883		14.6898	79.6757		7.68867	59.5868		15.6884	79.3417
0.689717	198.521		8.69114	143.211		1.6895	81.9721		9.68959	80.0426		2.68973	73.4307		10.6894	70.1055		3.68993	73.5799		11.6906	67.6868		4.68992	88.5511		12.6906	58.9277		5.69151	82.9742		13.6909	69.2943		6.6902	63.5503		14.6914	84.1611		7.68992	67.6003		15.6899	72.709
0.690619	198.146		8.69238	139.707		1.69082	82.3867		9.69133	77.2779		2.69146	65.9481		10.6904	66.5953		3.6916	82.2077		11.6916	64.3138		4.69096	85.4286		12.6918	70.3888		5.69283	69.9265		13.6918	81.7425		6.6911	67.8538		14.6924	85.0857		7.69082	73.9258		15.6909	72.888
0.692078	186.186		8.69329	151.487		1.69256	76.0373		9.69251	76.5562		2.69285	63.8515		10.6915	64.9162		3.69264	74.6237		11.6927	70.9405		4.69269	87.7071		12.6928	74.2062		5.6938	75.5392		13.6932	73.6485		6.69249	70.1472		14.6935	90.4807		7.69214	72.6404		15.692	78.7989
0.693883	200.606		8.69482	143.67		1.69401	81.7574		9.69348	83.2635		2.69376	64.4152		10.6931	63.9171		3.69368	78.3068		11.6942	71.3729		4.69436	86.4426		12.6941	74.6535		5.69505	75.0114		13.695	71.4236		6.69437	73.4516		14.6951	86.1682		7.69394	75.4259		15.6937	75.3096
0.695133	190.403		8.69662	138.162		1.69499	84.021		9.69487	86.3949		2.69501	73.7827		10.6948	61.1495		3.69528	72.9685		11.696	67.9403		4.6954	95.6878		12.6958	65.6021		5.69672	72.9327		13.6964	60.7469		6.69568	76.8067		14.6968	79.5117		7.69533	82.8072		15.6953	72.6404
0.695897	176.721		8.6978	132.687		1.69617	79.3745		9.6966	80.3587		2.69681	78.7095		10.6958	72.5748		3.69702	76.8813		11.6971	67.9015		4.69644	111.059		12.6973	63.3117		5.69832	69.3002		13.6973	67.0844		6.69652	71.9277		14.6979	86.4635		7.69631	72.6106		15.6964	77.8893
0.697217	179.864		8.69864	146.817		1.69783	85.1334		9.69806	86.1265		2.69827	77.767		10.6968	80.2245		3.6982	79.0226		11.6981	68.5845		4.69811	104.498		12.6983	60.571		5.69936	69.4434		13.6986	74.057		6.6977	83.1889		14.6989	89.7888		7.69756	67.4124		15.6974	79.8099
0.698953	175.447		8.69989	160.529		1.69943	99.5559		9.69897	85.5002		2.69917	75.2172		10.6984	64.5434		3.6991	75.9538		11.6996	79.0852		4.69978	91.5394		12.6994	71.1701		5.70047	71.9843		13.7004	72.6494		6.69944	71.1194		14.7006	77.8476		7.69936	71.4057		15.6991	85.4197
0.700272	179.205		8.70162	153.775		1.7004	104.008		9.70022	75.3126		2.70042	82.3002		10.7002	70.5081		3.7007	88.2887		11.7013	80.3796		4.70075	95.0019		12.7011	63.8038		5.70214	70.1144		13.7018	69.3032		6.70089	60.5173		14.7023	80.0366		7.70082	74.1018		15.7008	79.5415
0.701175	172.867		8.70294	150.217		1.70151	90.1079		9.70202	79.1807		2.70223	82.5626		10.7013	72.7388		3.7025	76.6546		11.7025	67.3975		4.70165	105.151		12.7027	56.8162		5.7038	70.8272		13.7027	64.9222		6.70187	63.3565		14.7033	80.5138		7.70158	73.8095		15.7017	69.5179
0.702425	164.043		8.70391	146.811		1.70325	85.9714		9.70355	85.5956		2.70369	75.7182		10.702	70.7407		3.70362	67.6152		11.7034	60.1684		4.70318	96.162		12.7037	70.4723		5.70484	73.5769		13.704	72.5659		6.70298	75.4826		14.7042	89.8723		7.70276	71.3968		15.7026	65.9421
0.704161	176.312		8.70516	146.605		1.70492	105.38		9.70445	85.5748		2.70452	89.0879		10.7035	62.5989		3.70445	69.2674		11.7049	64.4033		4.70485	97.4623		12.7048	72.047		5.70582	76.5294		13.7059	70.5111		6.70471	74.9189		14.7056	89.586		7.70443	81.0834		15.7042	51.4421
0.705758	193.061		8.7069	140.211		1.70582	88.6555		9.70563	75.3782		2.70556	80.8955		10.7052	71.5668		3.70584	82.6133		11.7067	71.3312		4.70596	87.2478		12.7065	66.5833		5.70755	78.1726		13.7073	60.4636		6.70638	69.8072		14.7073	82.4433		7.70596	65.9004		15.7059	61.0183
0.70673	185.999		8.7085	137.998		1.70672	88.1217		9.70737	75.2828		2.70723	72.715		10.7064	69.8967		3.7075	79.3686		11.708	77.0155		4.707	74.2509		12.7082	66.0584		5.70929	76.2311		13.7081	75.3901		6.70742	75.3663		14.7085	84.3639		7.70693	64.788		15.707	77.2988
0.707772	187.442		8.70947	168.632		1.70832	81.0118		9.70897	69.3837		2.70883	80.818		10.7074	69.8132		3.70875	78.3904		11.7088	76.6487		4.70839	85.4585		12.7091	65.8497		5.71026	89.9886		13.7092	76.6785		6.70846	74.6028		14.7094	74.6803		7.70804	62.4498		15.708	78.5782
0.709508	181.439		8.71051	159.441		1.70992	82.7058		9.7098	80.7762		2.7098	81.647		10.7087	65.5485		3.70973	74.5312		11.7101	69.6134		4.71019	92.9322		12.7101	64.8208		5.71109	82.0019		13.7109	69.0825		6.71006	69.5448		14.7108	83.3619		7.70971	75.4677		15.7095	74.8175
0.711175	175.208		8.71225	141.231		1.71103	90.3256		9.71077	87.2687		2.71091	88.9955		10.7105	68.8529		3.71105	66.977		11.7117	65.3129		4.71151	94.0267		12.7116	67.0545		5.71262	71.5131		13.7124	64.3734		6.7118	66.3328		14.7126	92.1389		7.71137	82.6163		15.7112	75.6764
0.712147	189.929		8.71391	149.605		1.712	108.079		9.71244	83.1024		2.71251	79.3029		10.7119	77.9848		3.71285	60.1803		11.7131	67.1023		4.71242	95.2196		12.7133	68.3876		5.71429	64.0126		13.7134	72.551		6.71291	70.189		14.714	93.4391		7.71249	68.1222		15.7125	83.7078
0.713189	183.368		8.71488	145.117		1.71353	116.844		9.71397	79.6161		2.71424	64.4331		10.7129	71.2119		3.71431	69.673		11.714	74.8921		4.71374	96.2276		12.7144	71.194		5.71547	69.2734		13.7145	69.679		6.71388	76.3445		14.7149	93.6121		7.71346	76.7948		15.7134	78.1219
0.714925	171.287		8.71593	146.939		1.71533	102.01		9.71501	81.5814		2.71535	86.5082		10.714	68.3876		3.71521	79.4849		11.7153	71.5429		4.71554	93.3914		12.7153	70.0369		5.71644	81.0536		13.7161	57.6781		6.71548	73.1355		14.7162	92.3715		7.71506	76.6666		15.7148	68.9632
0.716591	157.034		8.71766	149.525		1.71658	83.6124		9.71605	76.1059		2.71633	87.8831		10.7158	74.2509		3.71639	79.1926		11.717	72.5062		4.717	87.561		12.7168	64.275		5.7179	67.3617		13.7178	72.3929		6.71721	68.6501		14.718	87.2687		7.71679	65.8169		15.7166	75.912
0.717564	170.291		8.7194	141.034		1.71749	75.247		9.71765	77.0453		2.71778	69.509		10.7174	71.8501		3.71813	78.1995		11.7186	84.1969		4.7179	89.3414		12.7186	74.7102		5.71964	68.1968		13.7189	75.6168		6.71832	69.0616		14.7195	81.8737		7.71797	69.008		15.718	79.7115
0.718397	190.099		8.7203	150.404		1.71888	86.9019		9.71938	74.3016		2.71959	83.0875		10.7183	70.9495		3.71973	74.8116		11.7195	76.4727		4.71915	91.8317		12.7199	80.3646		5.72102	68.1789		13.7199	68.5189		6.71909	70.4991		14.7204	87.2031		7.71888	64.8774		15.7189	78.0683
0.719994	179.73		8.7212	145.672		1.72068	74.1077		9.72056	76.6189		2.72077	77.3137		10.7195	65.8586		3.7207	76.7232		11.7206	71.9187		4.72103	95.3419		12.7208	78.5961		5.72193	69.7088		13.7214	75.6466		6.72055	73.4457		14.7217	86.7468		7.7204	72.9655		15.7203	78.793
0.721661	174.531		8.72273	147.676		1.722	83.4782		9.72153	75.6436		2.72167	79.2075		10.7213	70.6035		3.72181	83.174		11.7224	63.5652		4.72249	87.0122		12.7222	81.1788		5.72318	76.5383		13.7232	82.8161		6.72228	73.8185		14.7235	83.1084		7.72228	73.8095		15.7221	87.3254
0.722772	168.629		8.7244	157.064		1.7229	92.3864		9.72299	82.1481		2.7232	78.8377		10.7229	73.6902		3.72355	71.2328		11.724	80.1678		4.72325	93.8447		12.724	80.8567		5.72498	76.3236		13.7244	74.7937		6.72346	71.9992		14.7249	86.2905		7.72339	80.9164		15.7234	80.4034
0.723744	157.034		8.72558	153.628		1.72429	88.3006		9.7248	79.5177		2.72501	70.0011		10.7237	74.1733		3.72521	67.5138		11.725	82.506		4.72436	88.1694		12.7253	76.8515		5.72644	73.0788		13.7253	58.7965		6.72443	72.6881		14.7258	88.1813		7.72422	81.6679		15.7242	73.5023
0.725203	158.236		8.72655	138.317		1.7261	85.6791		9.72612	67.8478		2.72626	81.5486		10.7247	68.6292		3.72612	77.8714		11.7261	74.2121		4.72603	94.1788		12.7262	70.6751		5.72734	76.5025		13.7268	70.8152		6.72582	75.2112		14.7268	89.7798		7.72561	69.1422		15.7254	81.3906
0.727008	165.778		8.72801	155.143		1.72749	83.0368		9.72702	81.9095		2.72702	75.3782		10.7263	72.5241		3.72702	83.5557		11.7278	63.6457		4.72749	96.1262		12.7276	75.9478		5.72859	63.8456		13.7287	77.6746		6.72763	66.9382		14.7285	83.9882		7.72735	67.1082		15.7271	80.2841
0.728328	167.025		8.72975	157.541		1.72825	89.5711		9.72841	74.1077		2.72834	70.4723		10.7279	65.6976		3.72862	80.2215		11.7295	64.4778		4.72853	88.5124		12.7294	63.9231		5.73047	66.127		13.7298	81.9095		6.72902	76.2729		14.7301	100.346		7.7286	76.5443		15.7286	77.5553
0.72923	163.846		8.73107	150.103		1.72943	99.9645		9.73022	77.1587		2.73008	86.9645		10.729	62.9121		3.73028	74.7698		11.7304	59.8224		4.72964	88.3334		12.7308	67.0844		5.73193	68.1043		13.7306	68.1162		6.72999	74.1316		14.731	79.127		7.72957	79.7354		15.7296	64.7313
0.73055	164.6		8.73197	146.378		1.7311	96.9792		9.73147	82.3121		2.7314	68.5755		10.73	67.4959		3.73139	73.0162		11.7313	64.6061		4.73131	97.4027		12.7316	77.7223		5.73276	84.1283		13.732	70.5588		6.73117	71.6026		14.7321	81.1997		7.73089	78.4112		15.7307	68.4204
0.732356	176.237		8.73329	138.603		1.73256	87.4805		9.7323	89.5353		2.73237	74.1286		10.7315	60.2936		3.73236	79.6429		11.7329	79.1449		4.73297	97.1342		12.7327	69.6372		5.7338	86.5559		13.7337	74.9428		6.73291	67.5138		14.7337	97.9067		7.73263	82.2405		15.7323	75.5721
0.733814	187.794		8.73509	131.503		1.7336	83.3768		9.73355	87.8204		2.73355	79.4073		10.7333	55.8201		3.73389	88.1962		11.7345	89.5293		4.73408	102.115		12.7344	55.8201		5.73547	75.8912		13.735	78.6647		6.73443	67.7554		14.7355	86.6931		7.73415	84.3431		15.734	77.8088
0.734717	182.461		8.73655	131.565		1.73478	81.1699		9.73528	84.0538		2.73528	87.4387		10.7345	57.1294		3.73563	74.1495		11.7356	76.8753		4.73505	94.6858		12.7359	73.6485		5.73707	75.587		13.7359	72.7567		6.73541	70.0398		14.7366	87.7161		7.73513	78.5961		15.7351	78.7393
0.735967	164.46		8.73745	118.67		1.73638	73.6455		9.73667	74.3314		2.73688	82.4851		10.7354	73.3115		3.73688	85.6344		11.7366	73.8244		4.73658	91.098		12.7369	79.8875		5.73811	78.7393		13.7373	67.3915		6.73659	71.021		14.7376	95.1182		7.7363	69.3629		15.7362	78.5663
0.737772	184.182		8.7387	152.271		1.73804	79.5654		9.73758	83.4036		2.73785	73.1653		10.7369	65.0802		3.73778	79.4282		11.7381	73.3592		4.73839	94.5963		12.7381	78.9033		5.73915	74.0749		13.739	61.0243		6.73832	68.158		14.739	90.6059		7.73804	80.988		15.7377	69.3599
0.73923	186.881		8.74058	147.052		1.73915	92.1538		9.73876	78.7303		2.73896	81.6858		10.7387	60.058		3.73917	82.8191		11.7399	65.4351		4.73957	95.4254		12.7397	73.4606		5.74075	68.8678		13.7405	70.514		6.73992	75.4229		14.7408	81.1132		7.73964	74.9816		15.7394	63.6726
0.739994	190.564		8.74204	153.098		1.74013	88.8762		9.74056	78.3247		2.74063	69.5507		10.7399	73.0967		3.74098	78.5156		11.7412	64.4838		4.74054	93.299		12.7413	70.5439		5.74248	77.0304		13.7414	76.4369		6.74082	76.589		14.7421	98.3689		7.74061	70.8212		15.7406	63.428
0.741106	176.41		8.7428	145.534		1.74172	90.2958		9.74216	85.0171		2.7423	67.3915		10.7408	71.9485		3.74236	75.077		11.7421	69.8281		4.74207	101.151		12.7424	68.1043		5.74359	75.1516		13.7425	73.0878		6.7418	67.1977		14.743	92.6906		7.74172	68.999		15.7416	78.2561
0.742842	168.418		8.74391	128.723		1.74346	92.5474		9.74313	82.169		2.74334	65.4083		10.7423	83.2336		3.7432	75.757		11.7435	78.793		4.74387	88.4527		12.7434	70.7675		5.74457	69.679		13.7443	67.5675		6.74339	76.1983		14.7444	79.1121		7.74346	69.2972		15.7431	75.7092
0.744369	173.541		8.74565	132.925		1.74464	92.8427		9.74417	87.5431		2.74438	74.4418		10.7441	64.3734		3.74459	73.4158		11.7453	69.7983		4.74506	90.8356		12.745	69.5925		5.74609	69.0527		13.7459	63.7949		6.74499	75.9359		14.7463	79.5475		7.74512	77.275		15.7449	62.6437
0.745342	175.402		8.74711	148.394		1.74554	88.8583		9.74584	101.017		2.74605	81.2265		10.7454	74.0869		3.74646	84.1761		11.7467	63.5801		4.74582	74.9786		12.7467	71.0002		5.7479	80.7553		13.7469	74.57		6.7461	68.1789		14.7476	86.1742		7.74603	67.824		15.746	80.5346
0.746453	180.854		8.74815	152.474		1.74714	79.3328		9.74751	83.6601		2.74778	75.9896		10.7462	72.712		3.74785	77.5076		11.7476	73.8363		4.74714	71.3282		12.7479	73.1355		5.74908	86.9466		13.748	68.4294		6.74714	74.1972		14.7483	90.3137		7.74693	73.6544		15.7469	90.937
0.74805	191.701		8.74926	137.452		1.74894	88.572		9.74862	75.9627		2.74876	67.0545		10.7474	68.1819		3.74862	72.047		11.7488	75.0979		4.74887	96.2962		12.7488	70.684		5.74998	79.4819		13.7498	69.679		6.74867	77.4479		14.7497	87.5133		7.74853	69.7237		15.7482	78.4619
0.749786	182.056		8.75086	121.771		1.75006	83.0666		9.74959	73.4934		2.74966	77.1736		10.7491	75.4259		3.7498	66.0704		11.7506	73.4009		4.75019	103.126		12.7504	70.2635		5.75151	76.422		13.7514	60.1922		6.75048	80.4153		14.7513	93.2393		7.75019	79.5684		15.7499	92.7323
0.750897	180.478		8.75252	113.573		1.75082	89.41		9.75126	68.7783		2.75119	81.7753		10.7505	76.4787		3.75146	64.5583		11.7521	76.5443		4.7511	105.022		12.7522	59.9059		5.75332	69.3062		13.7523	71.2238		6.75166	67.7047		14.7526	88.3125		7.75124	76.9797		15.7512	75.8136
0.7518	176.035		8.75364	137.014		1.75221	98.5628		9.75299	69.0467		2.75285	81.0655		10.7515	67.5943		3.75292	68.0924		11.7529	71.865		4.75242	95.4045		12.7533	62.9538		5.75457	69.5358		13.7532	66.8338		6.75256	79.9412		14.7536	94.1817		7.75221	70.6602		15.7521	71.3193
0.753328	174.779		8.75461	147.005		1.75394	87.7996		9.75403	74.4954		2.75396	83.1979		10.7527	66.4819		3.75389	79.6698		11.754	84.4206		4.75415	83.5796		12.7541	70.523		5.75533	76.3922		13.7548	64.1736		6.75402	83.8212		14.7549	95.7087		7.75381	67.7375		15.7534	70.5289
0.755133	183.902		8.7562	134.81		1.7552	91.6319		9.75487	75.5452		2.75494	76.3027		10.7544	65.0653		3.75507	76.759		11.7557	83.2575		4.75568	97.3907		12.7555	62.3276		5.75665	75.1963		13.7565	75.3096		6.75582	75.1784		14.7566	87.0331		7.75561	89.0223		15.7553	66.1002
0.756314	188.703		8.75794	132.934		1.75617	84.7009		9.7564	83.3231		2.75639	76.4429		10.756	68.9036		3.75674	80.4183		11.7572	71.3044		4.75658	96.162		12.7572	67.0486		5.75832	81.8111		13.7576	79.9591		6.75714	72.6553		14.7582	81.1997		7.75679	82.7773		15.7567	65.6678
0.757217	190.32		8.75912	124.288		1.75749	83.2575		9.75806	74.3016		2.75813	71.7338		10.757	78.5842		3.75841	78.2233		11.7583	63.5891		4.75776	88.9388		12.7585	78.2561		5.75964	72.5032		13.7586	83.8898		6.75805	76.7083		14.7592	85.202		7.75769	87.4715		15.7576	75.9955
0.758744	183.598		8.76002	145.907		1.75929	89.6158		9.75917	75.5571		2.75945	77.2183		10.7581	82.843		3.75945	71.4982		11.7594	74.3553		4.7595	92.452		12.7594	75.584		5.76061	72.1722		13.76	74.5103		6.75944	84.1373		14.7602	85.533		7.75915	80.4929		15.7588	78.3218
0.760619	192.843		8.76162	142.952		1.76068	97.9514		9.76021	82.3926		2.76035	72.9297		10.7597	76.8694		3.76042	76.4489		11.761	76.2848		4.7611	86.9377		12.7608	75.414		5.76186	75.0382		13.7618	69.503		6.76131	85.8133		14.7619	75.3991		7.76096	78.9928		15.7606	80.0813
0.76173	182.277		8.76343	136.179		1.76165	92.7204		9.7616	70.0011		2.76174	69.8699		10.7614	73.9676		3.76209	84.6115		11.7627	71.2924		4.76214	91.8227		12.7626	63.0523		5.76359	72.5867		13.7631	69.2018		6.76263	81.0267		14.7636	83.4275		7.76228	67.4273		15.7622	70.7675
0.762564	161.842		8.76454	132.8		1.76283	90.5195		9.76334	76.3475		2.76348	78.3725		10.7625	66.2762		3.76382	82.6968		11.7638	78.1518		4.76318	92.6011		12.764	61.0481		5.76519	75.414		13.764	72.5808		6.76339	74.731		14.7647	89.24		7.76318	70.1353		15.7632	66.2493
0.763883	163.595		8.76537	161.177		1.76457	101.411		9.76473	96.2246		2.76487	82.2674		10.7635	71.3729		3.76493	78.4261		11.7648	75.6854		4.76492	98.0946		12.7649	73.228		5.76616	60.9169		13.7654	71.021		6.76464	80.1469		14.7657	97.8321		7.76457	75.8106		15.7643	74.6088
0.765619	175.113		8.76676	155.43		1.7661	100.042		9.76563	83.1173		2.76584	64.6239		10.7652	76.4041		3.76591	80.8537		11.7663	69.7237		4.76658	99.5917		12.7661	82.16		5.76727	76.3027		13.7672	75.5333		6.76638	84.9127		14.7674	98.9445		7.76638	68.3608		15.766	80.3259
0.766939	183.353		8.76843	130.849		1.76707	79.8547		9.76695	81.7812		2.76709	72.375		10.7668	69.0318		3.7675	69.2048		11.7681	68.0864		4.76749	85.8491		12.7678	82.6819		5.76901	93.9849		13.7686	76.1954		6.76777	76.4727		14.7691	90.0363		7.76776	65.3427		15.7676	84.018
0.767842	186.067		8.76975	105.225		1.76825	79.8338		9.76869	81.0655		2.7689	88.4766		10.7679	74.4149		3.76931	75.3394		11.7692	56.3778		4.76839	89.8305		12.7694	72.4376		5.77061	79.6131		13.7695	67.6331		6.76874	74.0063		14.7701	88.8016		7.76853	63.6875		15.7685	87.8085
0.769092	186.094		8.77072	139.677		1.76999	88.6555		9.77022	76.8008		2.77035	77.5434		10.7687	63.7919		3.77035	76.1476		11.7702	54.6421		4.76999	83.7794		12.7703	59.1603		5.77165	61.9548		13.7708	75.7122		6.76992	68.4622		14.7709	84.4117		7.76971	65.7542		15.7695	82.3181
0.770828	187.182		8.77204	135.329		1.77158	84.3729		9.77112	84.3192		2.77119	78.9719		10.7702	67.6838		3.77112	70.0786		11.7717	70.6512		4.77165	76.6815		12.7715	60.6813		5.77269	65.125		13.7727	67.7256		6.77166	67.9105		14.7724	87.397		7.77144	59.8373		15.7711	71.5847
0.772425	193.52		8.77377	144.962		1.77249	90.6626		9.77237	82.3032		2.7723	70.7795		10.7719	69.8758		3.77257	69.0915		11.7735	76.4638		4.77276	79.4133		12.7733	71.6443		5.77443	73.9079		13.7741	68.0029		6.77325	72.1275		14.7741	89.0074		7.7729	67.8926		15.7727	70.523
0.773397	180.949		8.77523	139.928		1.77346	93.2185		9.77417	81.3578		2.77396	75.9269		10.7731	63.0761		3.77431	85.6881		11.7746	65.0087		4.77374	90.0244		12.7749	71.5966		5.77609	63.4608		13.7748	66.983		6.7743	75.3007		14.7753	90.6149		7.77381	76.094		15.7738	68.8648
0.774508	188.366		8.77621	128.249		1.77506	95.0049		9.7757	74.9279		2.77549	88.3274		10.774	62.6944		3.77549	72.041		11.7754	73.6544		4.77526	89.3802		12.7758	60.8573		5.77707	64.7134		13.7759	78.7065		6.77534	67.484		14.7762	94.1489		7.77499	73.9735		15.7748	81.6918
0.776244	181.552		8.77738	131.914		1.77665	93.809		9.77654	82.7445		2.77646	82.4105		10.7755	79.5833		3.77646	73.0967		11.7768	74.3105		4.777	91.4857		12.7767	72.6852		5.77797	67.1142		13.7777	70.9882		6.777	70.3291		14.7776	85.6493		7.77672	77.0364		15.7763	79.9173
0.777842	183.031		8.77912	139.242		1.77776	101.948		9.77758	85.873		2.77758	83.9076		10.7772	77.2302		3.77785	67.6808		11.7785	81.8707		4.77825	86.8035		12.7783	77.5463		5.7795	72.5271		13.7791	72.3929		6.77867	77.5613		14.7794	86.7856		7.77839	69.679		15.7781	76.0701
0.778814	177.582		8.78072	132.505		1.77874	94.0535		9.77924	82.2823		2.77924	69.685		10.7786	59.211		3.77959	73.225		11.7798	75.1008		4.77922	96.5229		12.7799	71.0777		5.78109	72.1305		13.7801	77.6925		6.77978	71.9157		14.7808	86.9854		7.77936	71.2894		15.7794	68.9185
0.779925	171.847		8.78169	144.863		1.78026	90.1824		9.78077	84.2268		2.78091	77.8177		10.7795	72.7508		3.78098	77.9251		11.7807	70.2844		4.78054	89.1476		12.781	68.671		5.78227	73.4128		13.7812	73.5858		6.78075	67.0724		14.7817	89.41		7.7804	80.976		15.7803	73.5799
0.781661	185.074		8.7828	167.305		1.78207	92.6578		9.78174	75.7212		2.78202	76.6755		10.7808	71.9396		3.78195	75.7242		11.782	67.0277		4.78235	85.0558		12.782	78.6319		5.78325	72.6792		13.783	74.8265		6.78242	69.0974		14.783	89.5502		7.782	74.3791		15.7817	73.1474
0.783328	184.346		8.78454	146.954		1.78332	91.1219		9.78285	82.6759		2.78299	72.9088		10.7826	72.5748		3.7832	75.7242		11.7838	78.2532		4.78374	87.2836		12.7835	76.425		5.78471	71.1642		13.7846	72.6046		6.78409	71.3819		14.7848	85.5718		7.78374	68.334		15.7835	80.4452
0.784161	192.035		8.7862	142.549		1.78422	86.1295		9.78445	77.5911		2.78452	76.0343		10.784	69.3658		3.78493	78.954		11.7854	76.0582		4.78464	91.107		12.7853	73.3353		5.78651	82.1451		13.7856	68.8231		6.78513	66.9561		14.7862	89.1178		7.78485	74.3523		15.7848	68.3519
0.785064	176.294		8.78704	131.073		1.78568	80.2304		9.78612	76.2043		2.78633	84.7576		10.785	75.2947		3.78646	77.272		11.7863	63.4429		4.78596	83.2157		12.7866	71.6264		5.78783	70.2874		13.7866	66.4879		6.78596	69.4732		14.7871	90.2302		7.78575	63.3028		15.7857	68.9274
0.786661	174.958		8.78801	126.492		1.78742	86.6723		9.7873	86.8452		2.78751	80.9432		10.7862	77.4181		3.78743	76.0671		11.7874	61.9249		4.78776	88.8553		12.7875	67.9522		5.78873	69.0408		13.7882	81.0476		6.78742	64.6269		14.7884	85.205		7.78742	70.7944		15.7871	78.3218
0.788328	173.553		8.78961	127.524		1.78874	82.5358		9.78827	85.6225		2.78841	73.8334		10.788	71.1105		3.78855	88.0113		11.7892	69.7446		4.78915	93.6419		12.7889	78.1637		5.79005	75.5363		13.79	86.5977		6.78916	84.3103		14.7903	82.0377		7.78922	77.099		15.7889	72.879
0.789439	170.669		8.7912	126.865		1.78964	79.5356		9.78973	94.0296		2.78994	77.5971		10.7895	72.9744		3.79035	77.7641		11.7908	65.2085		4.78999	85.3481		12.7907	71.6921		5.79186	72.9566		13.7912	82.4702		6.79034	80.0754		14.7917	92.2671		7.79026	70.6393		15.7903	75.4945
0.790411	161.433		8.79232	125.97		1.79103	77.5314		9.79153	83.8719		2.79174	80.0754		10.7903	77.9251		3.79195	78.7393		11.7917	57.189		4.79117	83.9941		12.792	61.0988		5.79332	67.1917		13.7921	73.2608		6.79131	78.3307		14.7925	92.5236		7.79103	65.8676		15.7911	70.016
0.791939	154.231		8.79329	126.048		1.7929	82.0944		9.79278	81.2086		2.79292	87.6534		10.7914	73.2906		3.79278	87.057		11.7928	64.9938		4.79283	90.6686		12.7929	68.8499		5.79422	77.8058		13.7937	68.659		6.7927	74.6833		14.7936	82.8787		7.79249	63.3087		15.7923	81.0148
0.793675	172.942		8.79482	130.16		1.79422	88.9865		9.79369	101.805		2.79369	92.4878		10.7931	71.0389		3.79375	88.232		11.7945	71.9873		4.79429	99.2636		12.7943	80.4183		5.79547	77.5076		13.7954	58.4893		6.7945	70.1353		14.7953	82.4195		7.79422	74.7668		15.7939	80.5227
0.794994	188.486		8.79662	135.099		1.79499	81.6918		9.79522	85.5539		2.79508	82.6252		10.7946	65.0295		3.79542	82.3211		11.7962	78.1607		4.79526	85.2706		12.7961	75.7808		5.79734	76.6129		13.7965	67.7852		6.79589	67.0486		14.7968	83.2873		7.7954	76.3982		15.7954	66.7831
0.795897	190.138		8.79787	127.569		1.79617	88.3006		9.79702	74.7728		2.79681	83.3112		10.7956	63.4161		3.79702	78.1995		11.7971	78.3993		4.79637	85.36		12.7975	73.4218		5.7988	61.248		13.7973	64.8327		6.79686	77.7313		14.7978	77.7372		7.79637	73.213		15.7964	76.9052
0.797286	195.348		8.79877	127.521		1.7979	92.0106		9.7982	81.9095		2.79806	79.1986		10.7967	65.459		3.79806	74.9905		11.7981	74.6803		4.79804	91.0563		12.7983	72.3064		5.79957	64.3436		13.7987	75.2858		6.79812	64.2064		14.7989	77.8655		7.79776	54.8688		15.7975	69.8579
0.799092	177.147		8.80016	132.177		1.79936	89.6307		9.79904	88.7211		2.79903	79.2075		10.7983	69.3181		3.7991	67.6957		11.7997	72.9983		4.79971	99.4605		12.7994	75.7957		5.80068	73.2339		13.8005	72.4973		6.79985	67.0933		14.8005	80.7434		7.79957	69.3509		15.7992	61.582
0.800411	164.52		8.80197	121.849		1.80033	89.2579		9.80028	83.4722		2.80035	67.3826		10.8	74.6416		3.8007	60.9736		11.8013	67.9582		4.80082	81.3935		12.8012	62.4916		5.80234	67.4661		13.8017	70.3888		6.80138	66.6967		14.8022	86.3084		7.80096	82.7952		15.8009	61.4478
0.801314	183.896		8.80329	126.659		1.80145	92.2104		9.80202	86.9108		2.80209	66.0555		10.8011	74.7072		3.80237	73.4457		11.8024	72.2826		4.80179	87.1494		12.8026	66.3835		5.80387	58.9963		13.8027	72.5748		6.80228	59.7031		14.8033	89.4965		7.80193	84.4445		15.8019	56.9027
0.802633	174.329		8.80419	126.105		1.80318	100.713		9.80334	77.9251		2.80355	76.3982		10.8021	71.0151		3.80362	75.7748		11.8033	77.0751		4.80339	86.5619		12.8035	69.1571		5.80484	63.3952		13.804	65.283		6.80346	61.2569		14.8043	89.5084		7.80311	76.6815		15.8029	64.5226
0.804439	158.439		8.80558	123.382		1.80478	97.4832		9.80431	77.2481		2.80452	72.1722		10.8036	68.1819		3.80452	67.6271		11.8049	66.6281		4.80512	86.6902		12.8047	62.1844		5.80595	67.3826		13.8058	63.3684		6.80527	62.2023		14.8058	97.2893		7.80492	82.333		15.8046	73.3711
0.805897	164.365		8.80739	126.916		1.80582	94.0774		9.80556	85.7388		2.8057	77.3734		10.8054	67.8419		3.80598	66.0555		11.8066	76.7024		4.8063	78.2591		12.8065	59.3244		5.80762	75.0293		13.8073	73.2846		6.8068	69.6521		14.8076	83.0398		7.80644	70.4872		15.8063	83.6094
0.806661	161.883		8.80877	125.016		1.80686	99.5798		9.8073	90.4598		2.80737	70.2635		10.8066	63.8038		3.80778	73.9586		11.8079	70.681		4.80721	86.4546		12.8081	66.3447		5.80929	77.2899		13.8082	71.4714		6.80763	83.6691		14.8088	71.1165		7.80742	67.3856		15.8074	75.6973
0.807772	161.06		8.80954	120.668		1.80846	85.8372		9.80883	77.6418		2.80896	70.696		10.8074	63.8933		3.8091	82.1868		11.8088	67.4631		4.8088	102.21		12.8091	75.1694		5.8104	79.3298		13.8093	66.6012		6.80867	73.2667		14.8097	77.0632		7.80853	77.266		15.8084	72.0052
0.809508	163.715		8.81072	132.284		1.8102	79.7533		9.8098	71.534		2.80994	68.993		10.809	69.8311		3.80993	75.8405		11.8102	69.172		4.81061	92.2104		12.8101	74.8831		5.81144	92.0464		13.8111	66.476		6.81034	64.7403		14.8112	82.9503		7.81033	69.4106		15.81	72.1991
0.810967	175.035		8.81246	140.035		1.81124	82.327		9.81091	71.9098		2.81105	75.1366		10.8108	59.5391		3.81132	71.5996		11.812	74.6326		4.81172	82.4284		12.8117	67.9791		5.81297	71.3908		13.8127	72.879		6.81193	66.3328		14.8131	75.7391		7.81193	72.4704		15.8118	76.3057
0.811939	170.335		8.81391	129.522		1.81221	78.2323		9.81265	66.7981		2.81278	76.2252		10.812	64.3854		3.8132	65.6141		11.8133	70.866		4.81256	80.5913		12.8134	67.3051		5.81477	55.9007		13.8137	68.6143		6.81298	73.2637		14.8142	87.9069		7.81283	85.3034		15.8128	85.8432
0.81305	172.408		8.81489	115.461		1.81388	83.9911		9.81431	72.2378		2.81445	68.3638		10.8128	66.3149		3.81445	78.1309		11.8142	65.0325		4.81394	81.7872		12.8145	59.2707		5.81596	64.7582		13.8148	66.0286		6.81402	78.1786		14.815	83.5438		7.81381	84.0866		15.8137	88.6197
0.814717	164.749		8.81607	130.975		1.81561	88.4974		9.81528	79.6668		2.81535	67.5347		10.8141	65.8676		3.81521	74.8503		11.8156	79.9113		4.81561	88.0233		12.8155	69.0915		5.81686	76.1089		13.8165	76.4966		6.81562	64.791		14.8164	81.0297		7.81547	78.4381		15.8151	73.9586
0.816383	167.135		8.81773	115.413		1.81665	71.6652		9.81633	77.6358		2.81626	73.6395		10.8158	72.1036		3.81646	77.6746		11.8174	72.7746		4.81686	88.071		12.8171	81.2027		5.81839	72.4854		13.8181	74.0898		6.81735	76.9052		14.8181	83.7436		7.81707	71.9545		15.8168	75.6615
0.817494	171.856		8.81933	129.823		1.81749	74.6267		9.81806	75.7778		2.81785	67.5466		10.8172	64.4987		3.8182	70.347		11.8188	64.3496		4.81783	98.7656		12.8189	71.024		5.82019	72.0201		13.819	72.3929		6.81853	80.7106		14.8194	83.7645		7.81811	78.45		15.818	78.9063
0.818467	167.025		8.82044	138.696		1.81895	83.6542		9.81973	83.675		2.81945	82.2167		10.8181	71.1135		3.81959	69.5776		11.8195	72.7597		4.81915	87.054		12.8199	68.832		5.8213	67.6152		13.82	63.2759		6.81943	71.7547		14.8203	91.4887		7.81915	78.1339		15.8189	90.4002
0.820064	164.684		8.82141	135.21		1.82061	78.5365		9.8207	79.3298		2.82056	75.4289		10.8193	62.9419		3.82056	64.454		11.8207	73.4099		4.82096	82.9175		12.8208	62.6467		5.82214	66.3239		13.8216	70.5528		6.82089	81.8081		14.8217	80.8418		7.82068	71.7398		15.8203	80.9104
0.8218	157.377		8.82301	119.904		1.82179	83.8748		9.8216	76.1178		2.82153	78.1786		10.8211	64.1408		3.82174	69.9862		11.8224	75.5064		4.82242	83.2694		12.8222	71.6503		5.82352	66.1569		13.8232	76.5204		6.8227	80.806		14.8234	81.0685		7.82249	72.1633		15.8221	80.8239
0.82298	158.15		8.82475	130.134		1.82276	77.9967		9.82313	67.8359		2.82306	74.8324		10.8226	73.4874		3.82348	70.0637		11.8238	79.0166		4.82332	78.4172		12.8239	70.6751		5.82519	73.5262		13.8243	60.3294		6.82395	75.0144		14.8249	88.8404		7.82374	70.2755		15.8235	82.2197
0.823883	152.367		8.82593	129.99		1.82415	85.1543		9.8248	77.603		2.82487	78.1518		10.8236	67.1291		3.825	76.422		11.8248	68.495		4.8245	88.5601		12.8251	69.0378		5.82651	78.444		13.8253	72.1305		6.82485	81.4323		14.8258	91.0831		7.82464	70.3947		15.8244	70.0458
0.825481	155.117		8.82683	117.059		1.82589	96.4841		9.82591	85.9863		2.82612	86.1086		10.8247	73.7677		3.82605	87.2777		11.826	60.225		4.8263	93.5495		12.826	73.6037		5.82741	88.3424		13.8268	78.1458		6.82631	81.8021		14.827	84.2685		7.8261	73.6276		15.8257	78.1577
0.827286	168.027		8.82843	116.859		1.82728	83.9792		9.82688	91.3784		2.82702	82.0169		10.8265	77.2481		3.82716	82.7952		11.8277	69.2197		4.82783	85.9177		12.8274	65.5455		5.82873	71.361		13.8285	70.2963		6.82818	69.2913		14.8287	75.7301		7.8279	76.7948		15.8275	64.4361
0.828397	177.275		8.83023	118.13		1.82825	87.054		9.82834	85.1006		2.82841	82.0854		10.8281	69.0378		3.82882	70.3739		11.8293	65.4501		4.8288	107.062		12.8292	73.5202		5.83047	64.0663		13.8298	69.0855		6.82943	74.1256		14.8303	79.9382		7.82915	81.1401		15.829	70.5081
0.829161	156.226		8.83134	130.644		1.8295	98.9594		9.83015	86.2458		2.83014	76.6755		10.8291	63.7143		3.83049	70.2069		11.8304	73.4397		4.82992	92.118		12.8306	67.7584		5.832	66.1628		13.8307	70.6363		6.8302	77.3883		14.8313	86.6484		7.83005	81.7216		15.83	72.6703
0.830619	145.848		8.83211	125.902		1.83124	85.5986		9.83146	83.1352		2.83153	78.4232		10.8301	80.5227		3.83153	73.7379		11.8313	81.6798		4.83172	77.6597		12.8315	63.3117		5.83297	75.071		13.8321	78.4112		6.83152	75.3514		14.8324	76.2938		7.83144	75.9031		15.8311	72.4496
0.832355	140.921		8.83357	120.93		1.83276	78.2084		9.83237	87.0808		2.83244	76.3147		10.8319	85.7328		3.8325	71.021		11.8329	78.6051		4.83332	86.9526		12.8328	63.1209		5.83408	76.8246		13.8339	82.5417		6.83319	73.8423		14.8342	67.0009		7.83332	81.1997		15.8329	77.7313
0.833536	157.553		8.8353	137.885		1.83367	88.9597		9.83369	88.2738		2.83376	76.3594		10.8336	69.3092		3.83417	77.5553		11.8347	66.0704		4.83422	95.9532		12.8345	72.1782		5.83589	81.0387		13.8352	74.576		6.8345	71.3461		14.8358	84.2715		7.83464	84.7337		15.8344	79.7503
0.834508	160.255		8.83655	111.786		1.83485	82.0676		9.83549	77.9907		2.83563	84.8441		10.8345	81.1192		3.83591	80.4183		11.8358	69.166		4.83519	89.7351		12.836	70.866		5.83748	83.0875		13.8361	76.6367		6.83548	65.9332		14.8367	90.0274		7.8354	92.3864		15.8353	74.0809
0.835828	161.186		8.83752	128.106		1.83665	85.1811		9.83695	78.3963		2.83695	87.4089		10.8354	75.5542		3.83695	80.2006		11.8367	72.4018		4.83679	85.1274		12.8369	83.2336		5.83846	80.5674		13.8375	75.1396		6.83673	82.9652		14.8376	88.4467		7.83658	82.7445		15.8363	75.0323
0.837633	162.504		8.83884	133.563		1.83825	92.4043		9.83785	94.7722		2.83778	83.0547		10.837	75.0889		3.83778	82.0049		11.8383	83.6691		4.83839	91.8854		12.8381	80.2364		5.8395	75.912		13.8393	77.1974		6.83846	82.2346		14.8392	89.5502		7.83832	78.3367		15.838	80.9313
0.839092	177.609		8.84065	146.975		1.83908	107.826		9.8391	91.5812		2.83896	83.0786		10.8386	74.5193		3.83931	78.0891		11.8402	67.1828		4.8395	95.7475		12.8399	80.0455		5.84123	81.4592		13.8407	84.2655		6.84006	89.6098		14.8408	89.8812		7.83971	74.9219		15.8395	82.4761
0.839994	161.12		8.84211	138.257		1.84013	107.042		9.84098	79.7175		2.84063	91.8227		10.8397	73.2518		3.84098	90.0363		11.8412	72.2169		4.84047	89.0253		12.8415	82.667		5.8429	87.2091		13.8414	84.7785		6.84103	81.7842		14.842	93.7404		7.84068	91.2889		15.8405	93.3378
0.841175	152.277		8.84301	146.164		1.84179	109.332		9.84244	85.4763		2.84209	77.436		10.8407	82.0258		3.84216	84.7367		11.842	65.0653		4.842	89.6069		12.8424	88.7778		5.84387	82.6819		13.8427	90.3375		6.84214	83.5408		14.843	107.021		7.84193	101.125		15.8416	89.7977
0.842911	157.446		8.84419	139.743		1.84332	109.937		9.8432	85.6493		2.84313	82.7923		10.8422	87.7012		3.84313	83.1352		11.8434	78.3307		4.84374	91.6319		12.8433	82.2614		5.84477	84.6473		13.8443	91.8526		6.84381	87.0808		14.8444	105.154		7.8436	95.4522		15.8432	93.9819
0.844508	158.15		8.846	143.837		1.84436	111.112		9.84431	89.5979		2.84424	99.6752		10.844	88.903		3.84452	108.706		11.8452	91.0414		4.84499	104.292		12.845	80.7523		5.84637	82.1928		13.8458	81.3935		6.84548	94.6082		14.8462	106.976		7.84519	95.7176		15.8449	92.1597
0.845481	171.355		8.84752	141.645		1.8454	106.075		9.84598	79.9501		2.84591	98.2377		10.8452	97.5786		3.84625	100.618		11.8464	89.6605		4.84589	107.551		12.8466	89.1416		5.84797	97.7218		13.8468	85.2676		6.84652	91.8317		14.8475	101.193		7.84624	92.9113		15.8462	98.8342
0.846591	184.996		8.8485	145.036		1.84693	101.509		9.84751	99.8541		2.84758	106.672		10.8462	105.022		3.84764	91.1278		11.8474	96.341		4.84735	118.35		12.8476	87.8562		5.84908	105.407		13.8479	90.6298		6.84756	84.9485		14.8484	106.156		7.84735	87.2121		15.8471	92.953
0.848328	172.718		8.84968	162.757		1.84867	97.0358		9.84848	111.613		2.84862	116.158		10.8475	120.31		3.84861	87.0868		11.8487	100.501		4.84915	121.049		12.8487	93.7404		5.85005	93.964		13.8496	86.9347		6.8493	95.3001		14.8497	105.732		7.84901	101.617		15.8485	96.7257
0.849994	170.938		8.85141	161.045		1.84985	103.167		9.84959	110.182		2.84966	107.802		10.8492	121.556		3.84987	107.677		11.8505	111.121		4.85047	115.282		12.8503	89.3295		5.85158	90.0154		13.8512	95.9532		6.85096	92.4639		14.8515	115.935		7.85068	105.011		15.8503	102.315
0.850828	171.573		8.85308	161.627		1.85082	104.238		9.85126	107.856		2.85126	110.385		10.8507	113.686		3.85167	108.545		11.852	115.07		4.85131	121.622		12.852	98.9356		5.85332	109.502		13.8523	98.8819		6.85193	106.961		14.853	105.518		7.85172	106.863		15.8516	104.086
0.8518	176.219		8.85391	161.311		1.85228	125.532		9.85292	107.313		2.85299	107.614		10.8517	130.909		3.85313	113.251		11.8529	111.554		4.85269	133.525		12.8532	110.874		5.85464	117.175		13.8533	87.3612		6.85284	122.687		14.8539	107.525		7.85269	113.096		15.8525	112.732
0.853397	191.218		8.85489	182.822		1.85408	122.317		9.85403	110.975		2.8541	114.581		10.8529	135.681		3.85403	133.978		11.854	112.499		4.85457	135.365		12.8542	107.373		5.85554	128.568		13.855	99.6692		6.85437	123.286		14.8552	129.316		7.85436	126.814		15.8539	118.729
0.854994	183.201		8.85655	180.425		1.8554	135.063		9.85501	126.546		2.85508	122.946		10.8547	145.015		3.85528	127.888		11.8558	128.1		4.85596	140.476		12.8556	115.025		5.85693	124.473		13.8566	114.882		6.85603	130.304		14.857	125.413		7.8561	131.028		15.8557	116.716
0.856106	190.642		8.85815	177.621		1.85631	137.419		9.85653	119.075		2.85667	119.189		10.8562	164.702		3.85709	129.427		11.8574	130.566		4.85672	148.681		12.8574	120.39		5.85873	147.061		13.8577	122.138		6.85714	129.615		14.8584	129.597		7.85714	150.473		15.8571	126.436
0.857147	207.358		8.85919	180.571		1.85769	144.652		9.85834	130.492		2.85841	127.485		10.857	175.665		3.85861	147.738		11.8583	132.57		4.8579	132.687		12.8587	134.455		5.86012	144.854		13.8588	125.243		6.85812	140.214		14.8592	137.384		7.85797	138.738		15.8578	123.197
0.858675	206.457		8.86023	178.429		1.8595	148.102		9.85952	140.348		2.85952	146.599		10.8581	192.366		3.85945	155.415		11.8595	155.465		4.85964	137.375		12.8596	143.718		5.86102	150.172		13.8604	135.982		6.85957	129.809		14.8603	150.181		7.85943	151.076		15.8591	124.315
0.860411	206.538		8.86176	190.851		1.86075	147.222		9.86042	155.376		2.86035	158.776		10.8598	209.654		3.86049	153.139		11.8613	173.869		4.86103	153.676		12.861	141.959		5.86234	166.103		13.8621	148.135		6.86131	152.707		14.8621	163.255		7.8611	170.222		15.8608	145.436
0.861661	220.898		8.86357	195.992		1.86158	152.03		9.86195	157.607		2.86174	162.295		10.8613	224.122		3.86216	182.682		11.8628	176.849		4.862	159.426		12.8628	143.038		5.86415	176.539		13.8632	171.558		6.8627	183.115		14.8635	152.591		7.86235	203.445		15.8621	155.805
0.862564	232.284		8.86475	198.268		1.86283	163.509		9.86376	181.782		2.86348	179.229		10.8622	244.187		3.86368	197.576		11.8637	174.8		4.86318	170.786		12.8641	147.878		5.86554	180.21		13.864	148.263		6.8636	182.142		14.8645	173.362		7.86332	193.594		15.8631	179.834
0.864022	243.381		8.86565	226.224		1.86457	176.222		9.86494	192.241		2.86473	184.185		10.8633	275.015		3.86473	194.692		11.8647	170.604		4.86485	198.494		12.8649	165.063		5.8663	183.067		13.8655	174.081		6.86492	190.875		14.8656	173.353		7.86471	185.885		15.8644	162.14
0.865758	249.218		8.86711	259.334		1.86596	198.42		9.86577	193.77		2.8657	197.579		10.865	302.464		3.86577	190.997		11.8663	166.008		4.86644	210.388		12.8661	187.511		5.86748	208.727		13.8672	201.924		6.86673	191.889		14.8673	185.357		7.86651	217.921		15.866	171.835
0.867078	274.296		8.86891	269.104		1.86693	219.854		9.86716	202.294		2.86702	217.88		10.8667	301.379		3.86736	207.928		11.8679	185.381		4.86749	217.948		12.8678	204.423		5.86915	218.661		13.8684	211.447		6.86818	209.827		14.869	219.144		7.8679	235.055		15.8676	196.034
0.86805	302.756		8.87023	268.176		1.86811	239.373		9.86883	213.266		2.86876	221.742		10.8678	344.452		3.8691	234.336		11.869	223.143		4.86853	230.548		12.8692	213.117		5.87061	225.428		13.8693	217.226		6.86909	234.217		14.8701	240.575		7.86888	238.83		15.8687	234.008
0.869439	300.069		8.87107	284.943		1.86985	239.576		9.87015	241.47		2.87021	251.177		10.8688	375.874		3.87021	248.096		11.8699	229.77		4.87019	228.634		12.8702	217.277		5.87165	250.297		13.8707	230.393		6.87034	236.319		14.8711	243.343		7.87012	265.537		15.8697	264.112
0.871244	335.01		8.87252	309.699		1.87145	285.641		9.87112	258.039		2.87119	264.395		10.8704	383.568		3.87118	275.489		11.8715	256.784		4.87193	249.692		12.8714	236.084		5.87276	282.217		13.8725	259.951		6.87214	263.777		14.8726	260.193		7.87186	281.859		15.8714	250.506
0.872564	344.247		8.8744	323.6		1.87242	302.67		9.87237	266.557		2.87237	265.588		10.8721	411.877		3.87264	275		11.8733	281.651		4.87304	278.689		12.8731	249.224		5.87443	318.199		13.8739	274.093		6.8736	306.938		14.8744	283.699		7.87339	319.019		15.873	279.84
0.873397	380.41		8.87565	377.353		1.87346	316.213		9.8741	309.282		2.8741	300.132		10.8733	458.708		3.87445	319.941		11.8745	318.121		4.87401	324.408		12.8747	279.831		5.87609	356.444		13.8748	300.901		6.87443	319.618		14.8756	312.726		7.87429	356.617		15.8741	312.825
0.874578	414.528		8.87648	411.531		1.87519	355.4		9.87563	320.227		2.87563	353.799		10.8742	505.948		3.8757	341.616		11.8754	342.144		4.87561	333.543		12.8758	316.35		5.87714	366.36		13.876	316.332		6.87555	334.751		14.8765	333.161		7.87554	364.449		15.8751	322.431
0.876244	434.745		8.87773	414.361		1.87686	410.335		9.87653	351.109		2.8766	394.868		10.8758	551.247		3.8766	357.533		11.8768	342.913		4.87742	370.852		12.8768	352.299		5.87818	393.72		13.8778	332.517		6.87721	384.392		14.8781	363.178		7.87735	378.88		15.8768	345.365
0.877703	497.678		8.8794	460.163		1.8779	438.867		9.87772	370.938		2.87778	400.383		10.8776	600.267		3.87806	378.54		11.8786	385.814		4.87846	424.232		12.8785	363.295		5.87977	446.391		13.8793	416.129		6.87874	422.938		14.8799	425.321		7.87881	441.339		15.8785	384.931
0.878675	543.141		8.88086	518.408		1.87888	459.057		9.87952	391.346		2.87952	427.528		10.8787	669.278		3.87986	431.175		11.8799	453.2		4.87922	459.463		12.8801	424.408		5.88151	508.549		13.8802	478.18		6.87971	469.194		14.881	480.622		7.87964	526.735		15.8796	439.445
0.879855	600.926		8.88183	569.877		1.88054	501.314		9.88112	447.852		2.88112	489.799		10.8795	677.992		3.88112	530.627		11.8808	480.443		4.88068	468.997		12.8812	490.359		5.88262	557.405		13.8814	472.993		6.88082	511.796		14.8818	501.946		7.88075	552.341		15.8804	460.998
0.881522	645.956		8.88301	636.273		1.88228	571.374		9.88202	529.854		2.88202	563.623		10.8809	677.667		3.88188	565.609		11.8822	512.661		4.88242	533.37		12.8822	518.93		5.88359	602.802		13.8832	513.109		6.88249	554.655		14.8832	524.54		7.88242	591.669		15.8819	460.059
0.883119	689.379		8.88468	685.022		1.88325	674.652		9.88313	546.257		2.88299	604.046		10.8826	761.945		3.8832	594.932		11.8841	576.802		4.8836	615.074		12.8839	534.954		5.88519	623.296		13.8848	604.624		6.88416	637.51		14.8849	590.631		7.88394	647.146		15.8836	560.853
0.88423	768.944		8.88627	786.931		1.88408	737.51		9.88487	589.748		2.88459	641.697		10.8839	815.74		3.88493	662.961		11.8854	676.594		4.88457	665.666		12.8856	653.898		5.887	695.982		13.8856	671.312		6.88527	739.682		14.8861	701.084		7.88499	756.735		15.8848	644.918
0.885203	867.898		8.88732	891.789		1.88561	770.62		9.88653	683.853		2.88619	727.681		10.8849	866.666		3.88625	758.801		11.8861	748.605		4.88596	711.129		12.8866	746.15		5.88804	842.572		13.8866	736.574		6.88624	762.347		14.8871	772.168		7.88603	787.148		15.8857	685.618
0.8868	933.995		8.88836	948.859		1.88728	873.594		9.88744	782.913		2.88723	837.77		10.8861	984.569		3.88723	834.57		11.8874	793.483		4.88769	809.039		12.8874	786.981		5.88887	955.128		13.8883	814.592		6.88777	835.026		14.8884	789.29		7.88762	831.767		15.8871	758.244
0.888536	1029		8.89002	1012.13		1.88846	981.458		9.88834	860.838		2.88827	896.931		10.8879	1039.97		3.88848	891.017		11.8891	885.938		4.88908	918.024		12.8889	835.438		5.89033	1014.96		13.8898	913.271		6.88957	942.426		14.8902	833.735		7.88936	968.095		15.8889	872.135
0.889717	1193.08		8.89169	1114.72		1.88943	1076.36		9.88994	907.926		2.8898	979.988		10.8894	1182.8		3.89021	961.119		11.8906	1000.38		4.89006	1050.28		12.8906	941.883		5.892	1098.2		13.8909	992.332		6.89082	1036.29		14.8917	1002.49		7.89061	1110.93		15.8903	1006.99
0.890619	1314.4		8.8928	1249.36		1.89089	1158.22		9.8916	1022.38		2.8916	1080.37		10.8904	1269.12		3.89174	1115.95		11.8915	1086.05		4.8913	1053.52		12.8918	1060.76		5.89325	1238.05		13.892	1078.86		6.89173	1171.83		14.8926	1142.72		7.89151	1204.32		15.8912	1089.48
0.892217	1383.95		8.89377	1359.91		1.89263	1274.23		9.89272	1104.45		2.89285	1293.1		10.8915	1364.57		3.89271	1253.01		11.8927	1167.67		4.89304	1143.69		12.8927	1135.44		5.89422	1353.32		13.8935	1195.02		6.89325	1245.38		14.8937	1197.45		7.89297	1289.35		15.8925	1135.61
0.894022	1589.66		8.89537	1481.31		1.89401	1456.61		9.89369	1214.53		2.89376	1345.32		10.8932	1430.89		3.89382	1324.83		11.8944	1234.99		4.89457	1320.41		12.8942	1228.98		5.89554	1414.53		13.8953	1292.14		6.89506	1396.2		14.8955	1255.86		7.89478	1424.82		15.8942	1239.59
0.895133	1802.45		8.89718	1604.01		1.89492	1618.73		9.89522	1307.2		2.89514	1385.94		10.8948	1570.56		3.89556	1401.36		11.896	1425.27		4.89554	1529.28		12.896	1374.54		5.89734	1584.53		13.8964	1408.21		6.89624	1597.97		14.8971	1409.95		7.89603	1590.21		15.8957	1392.36
0.895897	1873.7		8.89815	1763.77		1.89624	1714.09		9.89695	1445.86		2.89695	1568.16		10.8958	1756.55		3.89716	1575.94		11.897	1568.63		4.89665	1620.03		12.8974	1510.51		5.89873	1799.4		13.8974	1563.89		6.897	1677.85		14.8981	1599.83		7.89693	1716.98		15.8966	1591.8
0.897356	1974.55		8.89898	1897.17		1.89797	1815.54		9.8982	1607.1		2.89827	1725.21		10.8969	1810.66		3.8982	1781.39		11.8981	1650.37		4.89846	1733.23		12.8983	1654.11		5.8997	1863.1		13.8989	1638.06		6.89839	1760.45		14.8992	1721.51		7.89839	1831.44		15.8979	1675.27
0.899092	2174.57		8.90051	1938.82		1.89943	2042.92		9.89917	1713.32		2.89917	1885.5		10.8986	1891.61		3.89924	1908.89		11.8997	1756.06		4.90005	1902.69		12.8995	1780.96		5.90089	1902.36		13.9006	1770.92		6.90006	1891.21		14.9009	1826.6		7.90019	1944.02		15.8997	1770.26
0.900272	2364.22		8.90218	2137.01		1.9004	2248.27		9.90056	1817.13		2.90056	2015.95		10.9003	2072.89		3.90098	1978.45		11.9014	1963.26		4.90089	2062.85		12.9013	1880.44		5.90262	2057.04		13.9019	1943.33		6.90138	2120.78		14.9026	1973.65		7.90144	2162.56		15.9012	1935.86
0.901244	2639.48		8.90336	2289.75		1.90165	2345.36		9.9023	1975.22		2.90237	2172.71		10.9012	2263.54		3.90264	2128.86		11.9025	2195.28		4.90193	2165.87		12.9028	2150.67		5.90422	2304.37		13.9028	2070.29		6.90228	2220.11		14.9035	2203.67		7.90221	2279.12		15.9021	2161.63
0.902564	2785.52		8.90433	2449.52		1.90346	2429.83		9.90369	2156.49		2.90369	2377.06		10.9021	2398.14		3.90362	2338.36		11.9035	2260.65		4.90353	2307.09		12.9037	2288.31		5.90519	2442.79		13.9042	2179.82		6.9036	2337.96		14.9044	2341.57		7.90353	2435.36		15.903	2202.31
0.904369	2922.75		8.90572	2608.04		1.90492	2685.13		9.90459	2362.17		2.90452	2548		10.9037	2458.32		3.90452	2562.33		11.9051	2317.24		4.90512	2518.67		12.9049	2340.79		5.9063	2587.47		13.9061	2369.44		6.90534	2488.42		14.906	2386.92		7.90526	2561.99		15.9047	2296.82
0.905758	3168.37		8.90752	2790.8		1.90568	2883.55		9.90591	2456.41		2.9057	2633.59		10.9054	2651.75		3.90605	2667.35		11.9068	2558.14		4.90617	2668.93		12.9067	2436.52		5.90804	2747.33		13.9073	2591.91		6.90687	2728.3		14.9076	2593.31		7.90658	2768.53		15.9063	2514.04
0.90673	3401.23		8.90891	3045.05		1.90679	3007.39		9.90772	2595.19		2.90744	2841.71		10.9064	2831.07		3.90764	2813.58		11.9079	2809.9		4.90721	2817.67		12.9082	2646.5		5.90964	2990.1		13.9081	2763.37		6.90784	2892.86		14.9087	2807.7		7.90756	2948.09		15.9073	2682.12
0.907911	3574.95		8.90989	3121.45		1.90846	3187.22		9.90917	2788.54		2.90883	3108.97		10.9074	2936.08		3.90882	2968.05		11.9087	2875.72		4.90881	2916.53		12.909	2867.9		5.91054	3208.02		13.9094	2856.36		6.90902	3053.98		14.9097	2987.62		7.90881	3143.15		15.9083	2824.09
0.909717	3724.44		8.91113	3301.49		1.90999	3401.94		9.90994	3036.85		2.9098	3209		10.9089	3052.42		3.9098	3136.87		11.9102	2942.8		4.91047	3074.89		12.9101	3003.19		5.91151	3335.24		13.9112	2990.12		6.91075	3160.21		14.9112	3028.33		7.91054	3288.6		15.91	2917.22
0.911244	4055.91		8.91287	3485.97		1.91096	3629.94		9.91112	3057.21		2.91098	3404.67		10.9107	3206.23		3.91125	3382.04		11.9118	3181.93		4.91172	3320.57		12.9118	3106.72		5.91311	3493.69		13.9125	3195.76		6.91235	3405.25		14.913	3153.53		7.91207	3425.94		15.9117	3192.19
0.912147	4334.55		8.9144	3679.48		1.91207	3889.2		9.91285	3223.68		2.91264	3562.83		10.912	3511.9		3.91299	3520.39		11.913	3408.11		4.91262	3536.29		12.9133	3294.98		5.91471	3660.56		13.9134	3394.11		6.91339	3611.29		14.9142	3410.05		7.91304	3652.05		15.9128	3422.67
0.913328	4466.93		8.9153	3920.89		1.91367	3978.3		9.91431	3444.92		2.91431	3769.6		10.9129	3830.81		3.91431	3741.5		11.914	3541.79		4.91408	3647.28		12.9143	3527.45		5.91582	3862.78		13.9147	3532.84		6.91443	3718.49		14.9151	3618.77		7.91415	3808.39		15.9138	3561.94
0.915133	4662.71		8.91655	4028.32		1.9154	4225.24		9.91529	3642.92		2.91535	4009.55		10.9142	3923.21		3.91521	4012.22		11.9154	3671.96		4.91589	3893.53		12.9154	3639.55		5.91686	4050.97		13.9164	3648.62		6.9161	3813.62		14.9165	3702.03		7.91589	3947.98		15.9153	3626.54
0.91673	4950.32		8.91836	4227.77		1.91651	4453.27		9.9164	3789.13		2.91633	4142.82		10.9161	3931.8		3.9166	4133.99		11.9172	3913.22		4.91721	4137.43		12.917	3805.45		5.91839	4218.22		13.918	3796.37		6.91777	4160.47		14.9183	3939.27		7.91756	4143.59		15.9171	3902.12
0.917564	5236.84		8.91988	4524.13		1.91749	4617.71		9.91806	3899.37		2.91799	4308.55		10.9174	4196.44		3.91841	4274.17		11.9186	4129.95		4.91804	4261.26		12.9187	4064.12		5.92012	4388.25		13.9189	4014.36		6.91874	4402.63		14.9197	4274.34		7.9186	4424.79		15.9183	4118.4
0.918536	5385.72		8.92072	4686.11		1.91901	4737.22		9.91973	4099.68		2.91973	4554.67		10.9183	4420.96		3.9198	4521.74		11.9195	4392.54		4.91943	4389.67		12.9199	4218.64		5.92137	4573.34		13.92	4262.55		6.91964	4452.74		14.9206	4408.47		7.91957	4640.48		15.9192	4296.18
0.920203	5484.98		8.92176	4727.98		1.92082	4999.69		9.92084	4304.68		2.92077	4824.34		10.9197	4531.15		3.9207	4752.28		11.9208	4420.11		4.92131	4543.02		12.9208	4380.78		5.92227	4753.91		13.9217	4334.93		6.92124	4596.77		14.9219	4490.29		7.92131	4695.64		15.9207	4356.99
0.92173	5873.26		8.92343	4922.56		1.922	5358.87		9.92181	4354.65		2.92174	4855.97		10.9215	4619.19		3.92195	4906.6		11.9225	4625.1		4.92255	4794.95		12.9223	4547.02		5.92366	4930.92		13.9234	4620.11		6.92284	4800.89		14.9237	4716.52		7.92297	4897.3		15.9225	4574.47
0.922772	6215.79		8.92502	5119.62		1.9229	5535.95		9.92334	4529.67		2.92334	5037.29		10.9229	4918.26		3.92375	5051.4		11.924	4849.36		4.92332	4980.4		12.9241	4697.26		5.92547	5149.67		13.9244	4862.78		6.92402	5049.8		14.9251	4940.09		7.92394	5171.78		15.9238	4792.38
0.923814	6421.29		8.92607	5346.88		1.92443	5679.97		9.92508	4780.5		2.92515	5353.86		10.9237	5132.11		3.92521	5247.31		11.9249	5038.79		4.92464	5111.74		12.9253	4916.88		5.92679	5392.9		13.9254	4994.25		6.92499	5287.98		14.9259	5089.57		7.92485	5307.9		15.9246	4918.6
0.925411	6537.73		8.92711	5558.56		1.92624	5949.53		9.92626	4985.61		2.92619	5586.48		10.9248	5248.94		3.92605	5469.58		11.9261	5206.71		4.92631	5347.12		12.9262	5164.41		5.92769	5556.33		13.9271	5139.63		6.92645	5330.83		14.9271	5210.4		7.92637	5393.55		15.9259	5081.65
0.927147	6789.91		8.9287	5700.81		1.92742	6253.56		9.92716	5116.8		2.92695	5765.5		10.9265	5428.09		3.92716	5678.96		11.9279	5460.64		4.92769	5587.98		12.9277	5229.32		5.92908	5616.99		13.9288	5300.9		6.92818	5544.21		14.9287	5367.55		7.92804	5654.87		15.9275	5316.75
0.928328	7148.99		8.93044	5899.86		1.92818	6410.86		9.92876	5291.34		2.92841	5876.54		10.928	5657.02		3.92882	5803.5		11.9295	5721.45		4.92867	5832.19		12.9295	5403.75		5.93095	5864.76		13.9298	5466.22		6.9295	5775.78		14.9302	5606.17		7.92922	5893.34		15.9289	5548.76
0.9293	7392.88		8.93162	6205.39		1.9295	6512.71		9.93056	5592.83		2.93014	6170.6		10.929	5863.21		3.93028	6069.83		11.9303	5919.45		4.92992	5906.47		12.9307	5773.37		5.93227	6200.08		13.9307	5748.89		6.93041	6066.13		14.9312	5847.19		7.93019	6069.14		15.9298	5784.29
0.930758	7532.99		8.93259	6381.55		1.93124	6748.78		9.93167	5862.01		2.93133	6489.36		10.9301	5960.13		3.93132	6290.4		11.9313	6008.17		4.93158	6142.99		12.9315	5979.84		5.93304	6404.19		13.9321	5835.66		6.9318	6261.15		14.9324	6041.65		7.93165	6285.19		15.9311	5845.9
0.932564	7807.89		8.93405	6489.5		1.93256	7163.77		9.93251	6030.5		2.9323	6661.49		10.9317	6168.69		3.93243	6412.15		11.933	6145.04		4.93318	6420.71		12.9328	6067.68		5.93422	6570.15		13.9338	6014.64		6.9336	6488		14.934	6174.27		7.93339	6484.53		15.9328	6074.62
0.933883	8222.51		8.93586	6730.32		1.93353	7327.85		9.9339	6166.61		2.93362	6693.68		10.9334	6450.67		3.93403	6625.82		11.9345	6484.5		4.93415	6615.21		12.9345	6227.11		5.93596	6785.39		13.935	6272.62		6.93499	6679.73		14.9356	6412.41		7.93478	6873.35		15.9344	6440.12
0.934786	8428.13		8.93711	6976.26		1.93478	7419.9		9.93563	6357.87		2.93542	6874.63		10.9345	6732.28		3.9357	6880.71		11.9356	6671.06		4.93526	6761.44		12.9358	6469.41		5.93734	7019.63		13.9359	6438.91		6.93589	6921.3		14.9367	6704.63		7.93568	6999.84		15.9353	6586.01
0.936175	8579.3		8.93801	7081.35		1.93651	7542.47		9.93688	6527.05		2.93681	7271.92		10.9355	6804.81		3.93681	7180.29		11.9366	6810.07		4.93693	6956.01		12.9368	6671.34		5.93832	7209.53		13.9374	6664.03		6.93721	7029.77		14.9377	6780.7		7.93693	7141.2		15.9364	6668.61
0.93805	8965.08		8.93947	7207.72		1.93804	7875.32		9.93785	6798.93		2.93778	7551.29		10.9371	6928.51		3.93778	7355.98		11.9382	7001.5		4.9386	7299.97		12.9381	6769.55		5.9395	7369.15		13.9391	6836.85		6.93902	7253.92		14.9394	6883.45		7.93874	7333.38		15.9382	6732.84
0.9393	9459.35		8.94127	7547.9		1.93901	8129.79		9.93924	6894.32		2.93903	7624.97		10.9388	7196.17		3.93938	7500		11.9399	7223.39		4.93964	7627.77		12.9398	6884.49		5.94116	7548.75		13.9405	7021.49		6.94041	7512.06		14.941	7209.49		7.94019	7650.52		15.9398	6931.8
0.940064	9671.53		8.94252	7837.17		1.94013	8324.18		9.94098	7133.86		2.94077	7791.57		10.94	7484.66		3.94111	7714.67		11.9411	7510.89		4.94061	7685.93		12.9413	7286.02		5.94283	7887.18		13.9414	7341.46		6.94124	7745.5		14.9422	7497.53		7.9411	7910.22		15.9409	7332.35
0.941314	9611.64		8.94336	8048.04		1.94186	8608.61		9.94244	7450.79		2.9423	8132.81		10.9409	7587.34		3.9423	8106.08		11.942	7735		4.94228	7808.21		12.9423	7538.4		5.94387	8142.42		13.9427	7470.07		6.94235	7798.71		14.9431	7627.31		7.94235	8078.47		15.9419	7539
0.94305	10010.5		8.94461	8240.15		1.94353	8958.95		9.94334	7695.82		2.9432	8480.25		10.9425	7788.99		3.9432	8310.04		11.9436	7818.41		4.94401	8042.13		12.9434	7667.38		5.94491	8226.59		13.9445	7614.42		6.94402	7938.35		14.9447	7752.93		7.94422	8226.52		15.9436	7655.51
0.944439	10425.8		8.94634	8301.09		1.9445	9262.48		9.94452	7707.77		2.94438	8695.46		10.9443	8014.82		3.94473	8383.2		11.9454	7999.01		4.94506	8432.76		12.9451	7779.65		5.94658	8473.62		13.9459	7882.57		6.94548	8244.33		14.9465	8017.41		7.94568	8389.55		15.9453	7895.42
0.945411	10596.4		8.94766	8570.19		1.94554	9447.12		9.94633	7920.37		2.94619	8732.29		10.9454	8286.62		3.94653	8586.82		11.9466	8317.2		4.94589	8567.34		12.9467	8021.41		5.94825	8731.01		13.9468	8109.52		6.94652	8486.61		14.9476	8220.9		7.94644	8702.49		15.9462	8212.21
0.946592	10807.5		8.94864	8852.69		1.94728	9608.61		9.94785	8203.07		2.94778	9024.59		10.9462	8457.33		3.94771	8935.98		11.9475	8524.54		4.94742	8768.44		12.9478	8240.3		5.94936	8994.63		13.9481	8129.52		6.94763	8749.65		14.9484	8465.88		7.94756	8913.8		15.9471	8384.73
0.948328	10966.5		8.94989	9045.32		1.94894	9884.96		9.94883	8490.79		2.94862	9316.57		10.9476	8530.68		3.94848	9168.28		11.949	8558.72		4.94908	8980.52		12.9488	8408.46		5.95033	9168.84		13.9499	8412.61		6.9493	8981.07		14.9499	8686.14		7.94929	9189.93		15.9487	8598.62
0.949925	11393.6		8.95162	9204.31		1.94992	10241.4		9.94994	8548.47		2.94959	9565.96		10.9494	8661.05		3.94987	9309.82		11.9508	8827.28		4.95026	9208.83		12.9506	8691.31		5.952	9337.02		13.9514	8788.61		6.95096	9258.54		14.9515	8850.01		7.95075	9383.03		15.9503	8750.15
0.950897	11685.8		8.95322	9617.5		1.95082	10368.8		9.95174	8763.76		2.95126	9791.9		10.9506	9019.58		3.9516	9598.14		11.952	9113.43		4.95124	9457.04		12.9522	9050		5.95373	9623.02		13.9522	9009.51		6.95207	9465.97		14.9528	9131.04		7.95179	9534.26		15.9515	9019.95
0.951939	11986.3		8.95419	9786.49		1.95235	10496.9		9.95334	9102.53		2.95278	9984.5		10.9516	9281.78		3.95292	9869.59		11.9528	9304.34		4.95269	9589.42		12.9532	9139.71		5.95477	9978.08		13.9533	9092.7		6.95305	9635.39		14.9537	9375.72		7.9529	9823.19		15.9525	9123.51
0.953675	12132.5		8.9553	10026.5		1.95401	10904.5		9.95424	9351.7		2.95389	10248.4		10.9529	9395.97		3.95389	9955.97		11.9541	9497.91		4.95443	9812.25		12.9541	9241.68		5.95561	10025		13.955	9194.73		6.95464	9725.41		14.9551	9514.88		7.9545	10086.6		15.9539	9281.46
0.955342	12504.7		8.95697	10178.9		1.95513	11167.9		9.95522	9548.44		2.95494	10415.8		10.9547	9455.75		3.95514	10084.5		11.9558	9714.18		4.95582	10138.5		12.9556	9449.77		5.95707	10178.6		13.9565	9470.84		6.95638	10030.8		14.9569	9671.87		7.95624	10225.2		15.9556	9617.49
0.956383	12824		8.95864	10309.4		1.9561	11373		9.95681	9661.54		2.95646	10503.2		10.9561	9627.73		3.95688	10402.1		11.9572	9871.51		4.95672	10294.7		12.9572	9538.93		5.9588	10486.2		13.9575	9730.68		6.95756	10371.5		14.9583	9804.71		7.95735	10550.2		15.957	9818.24
0.957355	13087.8		8.95968	10508.4		1.95756	11550.6		9.95841	9790.05		2.9582	10870.7		10.957	9973.13		3.95841	10681.4		11.9581	10075.4		4.95797	10412.9		12.9584	9767.01		5.95998	10641.1		13.9587	9831.02		6.95846	10474.8		14.9592	9966.92		7.95832	10678.8		15.9579	9926.96
0.959022	13240.7		8.96065	10728.8		1.95936	11794.1		9.95952	10032.8		2.95938	11127.7		10.9582	10005.5		3.95938	10926.5		11.9593	10286.5		4.95978	10747.1		12.9594	9958.46		5.96089	10831.4		13.9602	10002.1		6.96006	10543.7		14.9604	10189.8		7.95985	10996.8		15.9592	10189.7
0.960758	13616.4		8.96232	10908.9		1.96061	12057.8		9.96056	10244.4		2.96035	11359		10.96	10247.5		3.96056	11048.5		11.9611	10506.9		4.96124	10878.8		12.9608	10227.1		5.96227	11107.8		13.9619	10196.7		6.96187	10879.5		14.9621	10432		7.96165	11202.1		15.961	10272.3
0.9618	14036.1		8.96405	11110		1.96158	12326.2		9.96209	10318.3		2.96181	11617.6		10.9615	10590.9		3.9623	11152.7		11.9627	10598.9		4.96214	11069.9		12.9626	10510.4		5.96408	11264.9		13.9631	10517.4		6.96298	11123.1		14.9637	10768		7.96283	11246.7		15.9625	10535.3
0.962633	14093.9		8.96502	11305.9		1.9629	12535.6		9.96383	10609.6		2.96362	11716.8		10.9625	10800.7		3.96389	11560.3		11.9636	10909.8		4.96339	11186.7		12.9639	10743.4		5.96547	11492.8		13.9641	10645.1		6.96381	11198.5		14.9647	10823.6		7.96374	11407.4		15.9633	10824.5
0.964161	14213.6		8.96586	11433.7		1.96471	12695.5		9.96508	10751.1		2.96487	11883.4		10.9636	10947.1		3.96487	11838.7		11.9647	11081.6		4.96519	11386.8		12.9649	10975		5.96637	11630.8		13.9655	10761		6.9652	11424.3		14.9658	10995.1		7.96526	11636.1		15.9646	10929.3
0.965828	14499.3		8.96739	11648.1		1.9661	13110		9.96598	10986		2.96577	12140.4		10.9654	10974.2		3.96591	11874.1		11.9664	11164.8		4.96672	11638.4		12.9662	11144.7		5.96762	11790.7		13.9673	10989		6.96687	11553.6		14.9676	11029.9		7.96707	11752.4		15.9665	11083.8
0.967008	14838.5		8.96905	11831.4		1.96707	13334		9.96744	11125.4		2.96723	12280.9		10.967	11244.7		3.96764	11984.7		11.9681	11344.4		4.96756	11956.5		12.968	11161.8		5.96943	11923.9		13.9685	11274.5		6.96812	11791.2		14.9692	11263.1		7.96825	12046.6		15.968	11387.3
0.96798	15075.1		8.97023	12013.3		1.96832	13362.4		9.96924	11144.7		2.96903	12522.4		10.9679	11587		3.96931	12191.4		11.9691	11534.9		4.9686	12122.3		12.9694	11289.3		5.97096	12017.1		13.9694	11287.4		6.96909	11847.5		14.9701	11535.4		7.96901	12123.7		15.9687	11702.1
0.969439	15268.4		8.97127	12197.8		1.97013	13392.6		9.97056	11352.8		2.97028	12789.7		10.9689	11679.6		3.97021	12455.7		11.9702	11756.1		4.97026	12262.1		12.9703	11433.5		5.97186	12276.1		13.9709	11393.2		6.97041	12012.5		14.971	11713.8		7.9704	12247.7		15.9698	11645.2
0.971175	15324.7		8.97273	12381.5		1.97158	13595.3		9.97147	11486.6		2.97112	12725.8		10.9705	11741.1		3.97118	12616.6		11.9718	11818.3		4.97186	12445.6		12.9716	11646		5.97304	12464.4		13.9728	11586.5		6.97221	12160.5		14.9727	11717.1		7.97207	12304.6		15.9715	11779.9
0.972564	15531.2		8.97447	12333.6		1.97235	13968.4		9.97285	11740.9		2.97237	12870.2		10.9721	11884.1		3.97278	12634.1		11.9736	11973		4.97283	12638.7		12.9734	11797.6		5.97484	12513.4		13.974	11675.6		6.97367	12313.2		14.9743	11983.5		7.97339	12509.7		15.973	12021.3
0.973467	15578		8.97586	12552.5		1.97346	14169.8		9.97473	11855.9		2.97403	13215.5		10.9732	12255.9		3.97438	12781		11.9745	12191.3		4.97387	12828		12.9749	11996.4		5.97644	12774.2		13.9748	11739.6		6.97457	12405.9		14.9753	12197.7		7.97436	12692		15.974	12232.2
0.974786	15844.1		8.97676	12776.4		1.9752	14275.2		9.97605	11997.2		2.97542	13355.6		10.9742	12374		3.97549	12925.8		11.9754	12359.6		4.97547	12889.5		12.9756	12069.1		5.97727	13075.7		13.9761	11950.6		6.97575	12631.7		14.9764	12282.8		7.97561	12827.3		15.9751	12152.3
0.976522	16066.7		8.97808	12895.3		1.97665	14452.9		9.97681	12212.6		2.9764	13428.5		10.9757	12366.3		3.97646	13041.9		11.9769	12443.5		4.97721	12900.7		12.9767	12380.7		5.97825	13077.7		13.9778	12012.8		6.97749	12654.2		14.9779	12328.4		7.97735	13045.6		15.9768	12191.4
0.97805	16339.9		8.97989	12889.7		1.97763	14444.1		9.97806	12099.2		2.97765	13434.8		10.9774	12539		3.97799	13293.7		11.9786	12534.6		4.97832	12954.4		12.9785	12465.8		5.97991	12954.8		13.9791	12236.6		6.97909	12837.3		14.9796	12500.9		7.97887	13174.9		15.9784	12337.8
0.978953	16624.8		8.98127	12859.6		1.97874	14601.2		9.9798	12186.1		2.97931	13667.4		10.9787	12649.8		3.97973	13271.8		11.9797	12583.9		4.97929	13150.2		12.9799	12459.3		5.98151	13105.5		13.9801	12332.6		6.98006	13082.2		14.9808	12587.4		7.97985	13190.3		15.9796	12526.1
0.980133	16652.6		8.98225	13083.2		1.9804	14758.3		9.98119	12425		2.98091	13856.7		10.9796	12650.6		3.98105	13386.9		11.9807	12627.4		4.98082	13364.6		12.9809	12519.3		5.98255	13278.2		13.9814	12404.5		6.98117	12986.5		14.9817	12537.6		7.98103	13254.2		15.9805	12671.5
0.981939	16511.3		8.9835	13183.2		1.98207	14970		9.98216	12607.8		2.98195	13830.9		10.9811	12758.1		3.98195	13556.5		11.9822	12913.7		4.98255	13443.1		12.982	12549		5.98359	13299		13.9831	12462.8		6.98291	13086.6		14.9832	12771.8		7.98276	13358.7		15.9821	12841
0.983467	16750.9		8.9853	13290.2		1.98318	15009.6		9.98334	12726.3		2.98299	13891.8		10.9829	12957.1		3.98334	13691.9		11.9839	12847.8		4.98381	13526.2		12.9837	12646		5.98512	13500.1		13.9846	12543.2		6.98457	13271		14.985	12870.3		7.98436	13371.4		15.9839	12875.1
0.9843	16999.4		8.98676	13286.4		1.98415	15175.6		9.98508	12686		2.98466	13947.1		10.9842	12938.1		3.98507	13734.7		11.9852	13052.6		4.98471	13417.6		12.9853	12941.4		5.98686	13433.7		13.9856	12748.7		6.98548	13417.2		14.9863	12878.1		7.9854	13533.3		15.985	12834.7
0.985342	17070.1		8.98759	13344.3		1.98575	15146.8		9.98667	12749.9		2.98633	14136.1		10.9851	13054.3		3.98646	13868.5		11.9862	13132		4.98617	13466.5		12.9865	12977.1		5.98804	13477.9		13.9867	12740.2		6.98645	13369		14.9872	12974.6		7.98644	13646.5		15.986	12844.4
0.987008	17125.6		8.9887	13509.5		1.98749	15216.1		9.98771	12879		2.98744	14369.6		10.9865	13211.7		3.98737	14010.5		11.9875	13039.8		4.98797	13624.1		12.9874	12892.8		5.98901	13686.1		13.9884	12820.5		6.98805	13420		14.9886	13033.7		7.98818	13672.2		15.9875	12941.3
0.988536	17303.2		8.99037	13518.9		1.98867	15448		9.98876	13044.9		2.98841	14392.1		10.9883	13321.5		3.98868	14028.7		11.9892	13085.8		4.98922	13779.2		12.989	12925.3		5.99047	13729.2		13.99	12963.6		6.98964	13425.9		14.9905	13067.3		7.98985	13753.1		15.9894	13108.4
0.989578	17339.2		8.99197	13615		1.98964	15393.4		9.99035	12978		2.99008	14366.4		10.9896	13281.5		3.99049	14023.7		11.9907	13295.2		4.98999	13795.4		12.9908	12958.9		5.99227	13766.1		13.9911	12967.9		6.99075	13562.9		14.9917	13141		7.99075	13907.2		15.9905	13177.2
0.990619	17384.9		8.99294	13593.6		1.99117	15478.9		9.99209	13148.3		2.99174	14661.3		10.9904	13284.5		3.99188	14229.4		11.9917	13369.9		4.99137	13831.4		12.9919	13036.6		5.99359	13780		13.9921	12914.3		6.99173	13540.8		14.9925	13093		7.99165	13994.8		15.9912	13160.8
0.992217	17361.2		8.99405	13622		1.99297	15531.2		9.9932	13081.5		2.99278	14614.5		10.9917	13327.2		3.99271	14201.7		11.9929	13371		4.99304	13887.2		12.9928	13222		5.9945	13875.2		13.9938	12944.4		6.99325	13646.5		14.9937	13152.3		7.99325	13846		15.9926	13329.5
0.993953	17249.4		8.99565	13743.4		1.99408	15611.1		9.99417	13139.3		2.99362	14473.7		10.9933	13503.5		3.99382	14301.4		11.9947	13466.1		4.99436	13899.8		12.9944	13153.9		5.99589	13970		13.9955	12966		6.99499	13780.2		14.9955	13248.3		7.99492	13831.9		15.9943	13196.8
0.995133	17467.1		8.99739	13718.5		1.99492	15654.6		9.99577	13183.3		2.99514	14404.5		10.9948	13575		3.99556	14447.4		11.9962	13489.5		4.99533	14033		12.9962	13237.3		5.99776	13920.7		13.9964	13011.4		6.99624	13688.3		14.9969	13274.7		7.99603	13862.5		15.9956	13365.6
0.996105	17636		8.9985	13737.8		1.99631	15633.6		9.99758	13112.6		2.99681	14507.5		10.9958	13510		3.99702	14236.6		11.997	13357.9		4.99658	13981.2		12.9974	13228		5.99901	13957.6		13.9973	13058.9		6.99721	13685.6		14.9978	13370.2		7.997	13913.3		15.9966	13337.2
0.997564	17664.2		8.99947	13763.5		1.99797	15649.6		9.99862	13051.7		2.99799	14668.8		10.997	13530.6		3.99806	14265		11.9981	13207.9		4.99832	14011.6		12.9981	13282.7		5.99977	13942.8		13.9989	13105.8		6.9986	13898.6		14.9991	13349.7		7.99846	13858.3		15.9979	13200.6
0.999369	17568.1		9.001	13892.3		1.99929	15502.9		9.99938	13135.1		2.99896	14573.5		10.9986	13540.4		3.99917	14193.6		11.9997	13329.2		4.99992	14024.6		12.9995	13337.4		6.00102	13903.4		14.0005	13089		7.00041	13889.2		15.0008	13293.1		8.00019	13866.5		15.9996	13234.4
1.00062	17393.5		9.0028	13903.3		2.00026	15594.8		10.0009	13115.8		3.00042	14537.6		11.0002	13540		4.00084	14328.6		12.0013	13452.1		5.00089	14018.2		13.0012	13248.7		6.00276	13943.5		14.0017	13182.7		7.00173	13803.2		15.0024	13366.8		8.00158	13870.9		16.0011	13326.1
1.00152	17498.7		9.00398	13790.6		2.00151	15687.1		10.0026	13182.2		3.00216	14524.4		11.0013	13466		4.0025	14199.7		12.0023	13334.9		5.002	13894.8		13.0025	13268.2		6.00408	13772.4		14.0027	13132.3		7.00263	13631		15.0034	13362.6		8.00249	13896.9		16.0021	13234.9
1.00305	17407.5		9.00488	13769.6		2.00325	15855.6		10.0038	13108.8		3.00355	14628.8		11.0023	13595		4.00355	14159.8		12.0033	13428.3		5.00367	13995.9		13.0035	13264.3		6.00505	13855.7		14.0041	13010.8		7.00395	13752.8		15.0044	13166.2		8.00381	13940.1		16.0032	13219.9
1.00486	17364.6		9.00634	13740.5		2.00478	15725.9		10.0047	13020		3.00445	14651.5		11.004	13619.2		4.00459	14207.7		12.0049	13476		5.00526	13937.9		13.0048	13180.5		6.0063	13828		14.0059	12963.2		7.00582	13810.4		15.0061	13184.1		8.00561	13980		16.005	13243.6
1.00604	17454.5		9.00815	13716		2.00575	15705.1		10.0061	12864		3.00577	14673.1		11.0057	13511.6		4.00612	14252.3		12.0067	13183.2		5.00631	13949.3		13.0065	13196.8		6.00797	13952.3		14.0072	13123.6		7.00721	13705.1		15.0078	13223.7		8.00707	13845.2		16.0066	13257.8
1.00687	17399.1		9.0094	13474.5		2.00686	15556.4		10.0079	13035.3		3.00751	14544.7		11.0067	13372.5		4.00785	14256.3		12.0078	13162.2		5.00742	13864		13.0081	13224.7		6.00957	13802		14.0081	13042.4		7.00798	13610.2		15.0089	13082.9		8.00797	13892.3		16.0075	13262.9
1.00812	17413.6		9.01016	13536.2		2.00867	15447.9		10.0093	12967.4		3.00896	14294.2		11.0077	13478.7		4.00903	14117		12.0088	13138		5.00908	13857.5		13.009	13245.8		6.01054	13604.1		14.0095	12880.8		7.00916	13675.2		15.0099	13044.6		8.00929	13718		16.0087	13198.6
1.00986	17439		9.01148	13532.9		2.01026	15383.8		10.0102	12827.6		3.00987	14462		11.0093	13501.5		4.00993	14151.5		12.0103	13011.7		5.01075	13825.3		13.0101	13218.1		6.01165	13636.1		14.0113	12816.4		7.01082	13618.2		15.0115	12979.4		8.0111	13576.3		16.0103	13234.7
1.01124	17291.9		9.01322	13531.4		2.01124	15406.9		10.0115	12982.4		3.01112	14459.4		11.0111	13410.5		4.01153	14016.9		12.0121	13268		5.01172	13789		13.0119	13041.7		6.01332	13599.7		14.0127	12806.8		7.01228	13480.4		15.0132	13096		8.01249	13639.9		16.012	13161.8
1.01222	17369		9.01454	13318.1		2.01235	15378.8		10.0132	12993.3		3.01292	14385.6		11.0122	13218.7		4.01334	13809.5		12.0133	13093.9		5.01262	13671.8		13.0135	12829.9		6.01505	13588.2		14.0136	12795.8		7.01325	13342.6		15.0142	12947.4		8.01325	13691.4		16.013	13089.2
1.0134	17168.8		9.01544	13252.2		2.01408	15236.5		10.0147	12874.4		3.01438	14214.4		11.013	13012		4.01445	13790.2		12.0142	12948.3		5.01415	13629.7		13.0144	12784.8		6.01609	13401.1		14.0148	12628.6		7.01437	13401.6		15.0151	12913.3		8.01443	13553.8		16.0139	12939.1
1.01513	17125.2		9.01676	13230.2		2.01568	15138.6		10.0157	12653.2		3.01521	14165.4		11.0145	13003.8		4.01521	13681.4		12.0157	13080.4		5.01582	13708.7		13.0156	12783.4		6.01707	13325.3		14.0167	12542.1		7.0161	13447		15.0166	12759		8.0161	13347.8		16.0155	12895.1
1.01673	16857		9.0185	13197.7		2.01658	15051.5		10.0169	12641.7		3.01633	13908.7		11.0162	13027.8		4.0166	13540.6		12.0175	13045.7		5.017	13647.7		13.0173	12691.2		6.01873	13205.8		14.0182	12572.8		7.0177	13207.9		15.0183	12638.1		8.01756	13304		16.0171	12876.7
1.0177	16657.3		9.02002	13246.8		2.01749	14988.4		10.0187	12596.8		3.01792	13922.2		11.0174	13091.5		4.01834	13600.7		12.0188	12862.8		5.0179	13413.6		13.019	12693.7		6.02047	13121.4		14.0189	12424.2		7.01874	13223.4		15.0194	12600.9		8.0186	13127.2		16.0182	12857.7
1.01881	16700.5		9.021	13124.8		2.01908	14962.1		10.0202	12458.4		3.01945	13984.2		11.0183	12941		4.01959	13574.3		12.0195	12701.3		5.01936	13358.2		13.0198	12599.7		6.02144	13009.1		14.02	12428.7		7.01978	13056		15.0204	12478.7		8.01971	13151.3		16.0192	12667.1
1.02048	16403.8		9.02211	12916.7		2.02075	14870.9		10.021	12336.5		3.02049	13770.3		11.0197	12863.6		4.02056	13569.1		12.0208	12740.7		5.02117	13322.8		13.0207	12444.4		6.02234	12845.9		14.0217	12269.7		7.02145	13001.1		15.0219	12305.3		8.02137	13094.7		16.0207	12615.1
1.02215	16355.9		9.02384	12754.9		2.02179	14736.3		10.0221	12293.2		3.02153	13597.4		11.0215	12753.9		4.02188	13331.9		12.0226	12620.9		5.02249	13032.5		13.0223	12477.2		6.02387	12891.4		14.0232	12216.6		7.02312	12772.2		15.0236	12342.9		8.02304	12866.7		16.0225	12364
1.02319	16211.6		9.02551	12693		2.02283	14576.3		10.0238	12216.4		3.02313	13487.3		11.0229	12569.9		4.02361	13200.9		12.0239	12380.2		5.02339	13016.5		13.024	12354.9		6.02554	12756.6		14.0242	12003.5		7.02423	12671		15.025	12152.9		8.02415	12753.6		16.0237	12388.6
1.02423	16216.3		9.02648	12482.5		2.02436	14540.4		10.0253	11936.7		3.02487	13511.5		11.0238	12502.9		4.02514	13025.6		12.0248	12274.1		5.02471	12933.6		13.0251	12212		6.02672	12450.5		14.0253	11859.7		7.02527	12519.7		15.0259	11989.2		8.02519	12659.5		16.0246	12202.7
1.0259	15938.3		9.02752	12402		2.0261	14370.5		10.0263	11817.3		3.02605	13283.6		11.0251	12415.5		4.02605	12783.6		12.0261	12197.4		5.02651	12816.6		13.026	12090		6.02762	12363.5		14.027	11797.3		7.02687	12358.9		15.0272	11918.3		8.02672	12474.2		16.026	12025.6
1.02756	15761		9.02933	12272.4		2.02735	14055.1		10.0274	11734.7		3.02702	13087.7		11.0268	12276.3		4.02723	12782.5		12.0279	12108.9		5.0279	12622.2		13.0275	11798.8		6.02908	12306		14.0287	11502.8		7.0286	12291.6		15.029	11912.9		8.02846	12180.7		16.0278	11919.6
1.02854	15570.9		9.031	12075.5		2.02825	13835.6		10.029	11592.6		3.02848	13153.7		11.0283	12055.4		4.02896	12662.6		12.0294	11847		5.0288	12460.4		13.0293	11598.7		6.03089	12121		14.0298	11470.6		7.02964	12141.6		15.0304	11708.8		8.02964	12044		16.0291	11797.9
1.02944	15420.3		9.0319	11858.5		2.02964	13812.5		10.0307	11384.7		3.03028	12896.2		11.0292	11916.3		4.03056	12447.3		12.0304	11611.1		5.03006	12248.1		13.0306	11486.8		6.0322	11933.8		14.0307	11400.5		7.03048	12058		15.0313	11452.2		8.03061	11979		16.03	11588.4
1.03097	15184.7		9.0328	11775.1		2.03145	13474		10.0319	11311.1		3.03153	12515.6		11.0304	11787.6		4.03153	12188.9		12.0315	11547.9		5.03186	12040.1		13.0315	11400.5		6.03311	11734.5		14.0323	11219.6		7.03194	11725.9		15.0325	11220.7		8.03214	11853.3		16.0314	11588.4
1.03263	15043.9		9.0344	11510.3		2.03283	13113.8		10.0329	11050.5		3.03237	12365.7		11.0322	11732.1		4.03264	12121		12.0331	11419.7		5.03332	11781.3		13.0329	11216.9		6.03436	11625.7		14.0341	11040.5		7.0336	11555.1		15.0343	11022.7		8.03395	11689.6		16.0332	11362.9
1.03381	14717.1		9.036	11347.1		2.03374	13033.4		10.0343	10926.6		3.0339	12265.6		11.0338	11613.5		4.03438	12037.8		12.0348	11153.8		5.03415	11673.5		13.0347	11035.7		6.03616	11519.6		14.0353	10617		7.03485	11535.9		15.0358	10804.1		8.03506	11443		16.0346	11033.5
1.03479	14272.6		9.03718	11095.4		2.03506	12815		10.0361	10777.4		3.03577	11983.7		11.0347	11314.5		4.03598	11841		12.0358	10961.8		5.03526	11503.1		13.036	10752.9		6.03762	11274.6		14.0362	10557.3		7.03582	11368.4		15.0367	10569.8		8.03589	11271.6		16.0354	10889.2
1.03624	14324.3		9.03815	10883.6		2.03686	12576.1		10.0374	10454.7		3.03695	11796.2		11.0356	11033.9		4.03688	11636		12.0368	10938.8		5.03693	11297.1		13.0369	10616.7		6.03852	10915.7		14.0377	10429.2		7.03714	11197.2		15.0377	10432.3		8.03728	11050.5		16.0365	10818.4
1.03805	14062.4		9.03961	10740.8		2.03825	12362.9		10.0383	10229.6		3.03771	11517.9		11.0373	11018.2		4.03785	11349.8		12.0386	10587.2		5.03846	11022.6		13.0383	10330		6.03977	10814.8		14.0395	10145.1		7.03895	10902.6		15.0394	10188.5		8.03894	10757.8		16.0382	10597.8
1.0393	13684.5		9.04134	10435.2		2.03901	12212.4		10.0397	10186.3		3.03903	11443.8		11.0389	10769.4		4.03938	11088.9		12.0403	10235.3		5.03943	10783.5		13.0401	10192.3		6.04165	10644		14.0406	9879.79		7.04034	10740.2		15.041	10148.1		8.04019	10574.2		16.0397	10376.3
1.04027	13342.4		9.04266	10189.8		2.04019	12090.2		10.0416	9870.87		3.04077	11226.9		11.0399	10587.5		4.04098	10815.1		12.0412	10055.6		5.04054	10653.2		13.0415	9953.19		6.04311	10226.7		14.0414	9745.72		7.04131	10396.1		15.0419	9926.97		8.04117	10370.1		16.0407	10166.5
1.04159	13215.7		9.04364	10054.2		2.04193	11856.9		10.0429	9682.01		3.04209	10875.2		11.041	10411.3		4.04209	10657.2		12.0421	9967.34		5.04221	10655		13.0423	9656.13		6.04387	9947.98		14.0428	9670.54		7.04249	10294.5		15.0431	9721.16		8.04249	10278.9		16.0418	10113.5
1.04333	12982.9		9.04495	9854.83		2.04339	11525.2		10.0437	9579.78		3.04299	10663.4		11.0426	10235.4		4.04306	10501.2		12.0436	9828.3		5.04387	10437.4		13.0434	9587.58		6.04498	9907.8		14.0445	9433.7		7.0443	10087.7		15.0447	9470.82		8.04429	10045.8		16.0435	9912.11
1.04479	12491.6		9.04676	9611.42		2.04436	11221.2		10.0449	9285.16		3.04424	10461.1		11.0443	9859.81		4.04459	10283.2		12.0453	9619.97		5.04499	9988.35		13.0451	9504.89		6.04665	9701.19		14.0457	9262.72		7.04582	9725.41		15.0463	9124.49		8.04575	9727.99		16.0452	9651.09
1.04569	12178.6		9.04815	9364.8		2.04554	10985.7		10.0467	9161.36		3.04598	10248.6		11.0454	9600.04		4.04639	9967.96		12.0464	9430.3		5.04596	9697.38		13.0466	9279.24		6.04818	9421.57		14.0467	9024.19		7.0468	9554.77		15.0475	8904.67		8.04665	9544.07		16.0462	9400.62
1.04694	12109.5		9.04905	9047.2		2.04721	10663.9		10.0481	8941.88		3.04758	9964.04		11.0464	9467.24		4.04764	9645.3		12.0474	9202.22		5.04749	9581.27		13.0476	9001.46		6.04922	9134.37		14.048	8907.23		7.04791	9299.03		15.0485	8849.45		8.04783	9358.52		16.0472	9167.96
1.04881	11873.5		9.05037	8985.59		2.04881	10382.7		10.049	8722.31		3.04855	9706.27		11.0479	9278.32		4.04855	9470.97		12.0489	8997.93		5.04922	9430.88		13.0487	8709.36		6.05026	8860.85		14.0498	8767.66		7.04971	9151.25		15.0499	8614.74		8.04964	9129.11		16.0488	9014.17
1.05027	11420		9.05218	8711.34		2.04992	10030.9		10.0502	8588.27		3.04966	9604.91		11.0497	9098.88		4.04993	9283.35		12.0506	8743.68		5.0504	9089.88		13.0503	8548.69		6.05186	8693.5		14.0512	8444.15		7.05131	8929.5		15.0517	8316.27		8.05124	8816.38		16.0505	8657.97
1.05104	11167.1		9.05357	8388.96		2.05089	9858.05		10.052	8402.37		3.05139	9383.35		11.051	8938.82		4.05174	9151.65		12.052	8555.63		5.05137	8865.6		13.052	8466.24		6.05359	8496.48		14.0522	8093.02		7.05214	8676.65		15.0529	7979.07		8.05221	8496.35		16.0517	8402.97
1.05222	10949.4		9.0544	8163.91		2.05256	9712.38		10.0535	7970.32		3.05299	9013.6		11.0519	8726.43		4.05306	8704.63		12.0529	8304.84		5.0529	8667.46		13.0531	8045.04		6.0547	8251.02		14.0534	7816.76		7.05318	8569.91		15.0538	7903.58		8.05325	8368.98		16.0526	8305.16
1.05388	10656		9.05551	8039.28		2.05429	9389.56		10.0546	7689.52		3.05403	8641.06		11.0533	8403.61		4.05396	8452.6		12.0542	8200.88		5.05471	8326.75		13.0541	7879.1		6.05568	8132.6		14.0551	7693.79		7.05478	8368.03		15.0553	7675.35		8.05499	8321.81		16.0542	8132.52
1.05541	10416.7		9.05725	7873.68		2.0554	9120.3		10.0556	7653.3		3.05508	8451.27		11.0552	8239.78		4.05535	8403.74		12.0561	7878.51		5.05582	8061		13.0557	7791.55		6.05721	7944.62		14.0567	7505.58		7.05638	8136.14		15.0572	7555.82		8.05665	7950.42		16.056	7904.18
1.05638	10060.5		9.0587	7616.05		2.05631	8918.69		10.0574	7410.24		3.05681	8308.32		11.0564	7917.41		4.05716	8160.21		12.0574	7671.61		5.05665	7911.4		13.0574	7516.37		6.05894	7660.21		14.0577	7257.57		7.05742	7806.29		15.0584	7232.13		8.05756	7842.58		16.0571	7651.34
1.05749	9872.46		9.05975	7338.61		2.0579	8818.6		10.059	7187.86		3.05848	8096.33		11.0572	7743.59		4.05848	7754.92		12.0583	7467.67		5.05804	7799.46		13.0586	7257.74		6.06019	7292.87		14.0587	7098.16		7.05846	7577.49		15.0592	7161.28		8.05853	7679.48		16.0579	7366.93
1.05916	9624.58		9.06086	7202.9		2.05971	8462.03		10.0601	7020.9		3.05938	7819.08		11.0585	7706.67		4.05931	7500.55		12.0597	7267.42		5.05971	7568.68		13.0595	7062.57		6.06109	7110.19		14.0605	6985.27		7.05999	7450.52		15.0604	7029.11		8.06012	7491.81		16.0593	7156.54
1.0609	9196.36		9.06246	7000		2.06082	8141.79		10.061	6767.18		3.06028	7567.54		11.0602	7469.92		4.06049	7426.67		12.0615	7014.07		5.06103	7326.19		13.0611	6907.79		6.06255	6999.19		14.0621	6620.75		7.06173	7156.84		15.0622	6749.83		8.06172	7271.82		16.061	6931.12
1.06201	8913.2		9.06412	6764.41		2.06165	7978.79		10.0627	6563.35		3.06188	7396.37		11.0616	7141.9		4.06223	7296.08		12.0629	6813.56		5.062	7104.7		13.0629	6689.02		6.06443	6695.74		14.063	6308.58		7.06298	6753.62		15.0635	6478.79		8.06276	7033.61		16.0623	6700.92
1.06291	8663.33		9.06523	6523.54		2.06304	7737.71		10.0645	6384.85		3.06348	7218.88		11.0626	6989.19		4.06361	7033.84		12.0637	6546.15		5.06332	6917.57		13.064	6328.29		6.06561	6512.75		14.0639	6267.3		7.06388	6607.07		15.0645	6298.41		8.06381	6893		16.0632	6592
1.06451	8519.78		9.06627	6297.93		2.06478	7469.82		10.0654	6218.22		3.06459	6881.77		11.0638	6801.45		4.06459	6868.04		12.0648	6436.04		5.06506	6711.48		13.0648	6159.31		6.06637	6259.65		14.0655	6153.72		7.06534	6589.59		15.0657	6114.39		8.06533	6779.76		16.0646	6456.98
1.06624	8177.59		9.06787	6212.96		2.06603	7260.49		10.0663	6031.72		3.06563	6680.08		11.0655	6567.17		4.06577	6709.31		12.0665	6298.98		5.06651	6523.69		13.0662	6028.49		6.06776	6104.7		14.0672	5951.02		7.06714	6424.71		15.0674	5951.68		8.06714	6505.44		16.0664	6173.33
1.06742	7749.25		9.06961	5971.72		2.067	7099.94		10.0678	5948.75		3.06709	6573.96		11.0671	6362.99		4.06743	6529.03		12.068	5997.25		5.06749	6197.31		13.068	5949.01		6.06943	5994.39		14.0683	5759.91		7.06846	6114.33		15.069	5788.04		8.06839	6175.36		16.0678	5912.26
1.0684	7560.8		9.07079	5760.04		2.06832	6925.13		10.0695	5700.71		3.06883	6464.17		11.0681	6023.29		4.0691	6260.44		12.069	5747.25		5.06867	6044.83		13.0692	5615.62		6.07075	5643.63		14.0693	5607.6		7.0693	5890.84		15.07	5618.9		8.06929	6171.47		16.0687	5788.3
1.06992	7472.27		9.07169	5648.7		2.07006	6667.04		10.0706	5419.01		3.07015	6113.25		11.0692	5822.27		4.07014	5936.11		12.0701	5697.08		5.0704	5926.79		13.0701	5389.22		6.07172	5471.46		14.0708	5402.06		7.07075	5729.66		15.0711	5390.19		8.07068	6032.09		16.0699	5753.98
1.0718	7182.41		9.07329	5418.4		2.07151	6262.25		10.0716	5195.18		3.07112	5839.24		11.0709	5744.7		4.07118	5709.27		12.0717	5519.58		5.072	5632.57		13.0715	5334.55		6.07297	5391.71		14.0725	5224.04		7.07263	5569.48		15.0728	5230.67		8.07249	5758.79		16.0716	5556.74
1.07291	6842.04		9.07502	5154.42		2.07249	5961.22		10.0731	5074.48		3.07244	5773.19		11.0726	5628.67		4.07285	5551.38		12.0734	5256.82		5.07297	5413.2		13.0733	5101.5		6.0747	5163.95		14.0739	4976.76		7.07388	5290.6		15.0744	4993.03		8.07381	5592		16.0732	5266.36
1.07374	6677.13		9.07613	4875.9		2.07367	5849.24		10.0749	4958.14		3.07417	5492.03		11.0736	5344.53		4.07452	5369.05		12.0745	5085.76		5.07401	5260.64		13.0747	4937.21		6.07623	4968.67		14.0748	4828.11		7.07464	5081.79		15.0755	4737.94		8.07471	5445.05		16.0742	5016.52
1.07513	6485.75		9.07697	4722.72		2.0754	5756.02		10.0763	4668.5		3.07563	5251.81		11.0746	5176.27		4.07563	5115.05		12.0755	4921.54		5.07575	5045.07		13.0756	4695.48		6.07721	4792.08		14.0762	4635.86		7.07589	5044.86		15.0765	4736.44		8.0761	5314.17		16.0753	4881.46
1.0768	6217.59		9.07836	4646.38		2.077	5546.63		10.0772	4465.02		3.07653	5078.24		11.0763	5064.45		4.0766	4978.61		12.0771	4805.88		5.07742	4751.15		13.0768	4542.7		6.07832	4611.45		14.078	4450.19		7.07763	4867.21		15.0782	4542.45		8.0779	5157.49		16.0771	4738.51
1.07812	6009.05		9.08009	4441.91		2.0779	5231.26		10.0784	4357.79		3.07778	4997.57		11.078	4901.88		4.0782	4920.17		12.0788	4584.29		5.07832	4593.71		13.0786	4426.24		6.08005	4452.05		14.0793	4259.96		7.07902	4570.5		15.0799	4315.84		8.07929	4847.2		16.0787	4472.77
1.07909	5675.46		9.08134	4249.96		2.07901	5082.3		10.0802	4160.01		3.07966	4735.88		11.079	4672.62		4.08	4562.17		12.08	4342.25		5.07929	4564.17		13.0801	4163.92		6.08165	4120.22		14.0802	4018.38		7.07999	4417.07		15.0809	4066.41		8.08006	4734.61		16.0796	4285.68
1.08034	5529.12		9.08232	3947.71		2.08082	4905.54		10.0816	3953.14		3.08112	4468.92		11.0799	4406.84		4.08105	4278.61		12.0809	4150.21		5.08089	4429.36		13.0811	3990.75		6.08269	3932.44		14.0816	3960.31		7.08117	4249.02		15.0817	3883.54		8.08124	4664.22		16.0805	4229.4
1.08208	5350.64		9.08364	3813.03		2.08242	4569.2		10.0826	3761.24		3.08188	4289.82		11.0814	4233.35		4.08181	4099.16		12.0825	3984.23		5.08249	4168.54		13.0822	3939.9		6.0838	3743.27		14.0834	3735.64		7.08291	4055.19		15.0833	3893.46		8.08297	4500.48		16.0821	4026.16
1.08361	5110.01		9.08537	3756.15		2.08332	4299.96		10.0838	3644.12		3.08299	4136.49		11.0831	4045		4.08327	3965.63		12.0843	3769.6		5.0836	3840.56		13.084	3758.2		6.08547	3659.46		14.0848	3471.53		7.0845	3867.82		15.0849	3692.34		8.08436	4286.13		16.0838	3777.56
1.08458	4828.49		9.08683	3529.38		2.08429	4269.91		10.0856	3456.47		3.08466	3976.78		11.0842	3836.28		4.085	3837.97		12.0854	3571.08		5.08457	3754.13		13.0856	3560.23		6.08714	3438.92		14.0855	3333.34		7.08548	3664.99		15.0861	3452.74		8.08533	4057.6		16.0848	3567.35
1.08576	4621.26		9.0878	3269.54		2.08589	4081.65		10.0871	3289.35		3.08619	3735.31		11.0852	3701.54		4.08618	3634.4		12.0863	3376.95		5.0861	3622.67		13.0865	3327.07		6.08811	3209.8		14.0867	3279.82		7.08659	3524.99		15.0871	3331.33		8.08651	3949.47		16.0859	3431.04
1.08749	4480.98		9.08898	3103.99		2.08749	3809.86		10.0879	3090.85		3.08716	3568.44		11.0867	3618.91		4.08716	3411.66		12.0877	3302.12		5.0879	3365.97		13.0874	3138.04		6.08901	3054.94		14.0884	3152.53		7.08825	3357.82		15.0885	3088.72		8.08818	3803.46		16.0874	3221.45
1.08909	4075.83		9.09072	3052.94		2.0886	3546.44		10.089	2935.66		3.08827	3491.09		11.0885	3399.3		4.08855	3271.3		12.0893	3149.74		5.08915	3168.82		13.089	3000.96		6.09054	2968.01		14.0898	2936.06		7.08992	3133.71		15.0903	2925.86		8.08985	3517.22		16.0891	3103.92
1.09006	3827.76		9.09232	2804.98		2.08957	3371.37		10.0907	2812.63		3.08994	3218.28		11.0898	3178.98		4.09028	3211.99		12.0906	2932.46		5.09005	3065.75		13.0906	2811.49		6.09221	2784.69		14.0908	2725.14		7.09103	2845.73		15.0917	2704.11		8.09089	3330.96		16.0904	2920.97
1.09117	3643.74		9.09329	2556.33		2.09117	3299.33		10.0922	2609.83		3.0916	2992.07		11.0907	3006.62		4.09167	2965.96		12.0916	2758.41		5.09144	2877.05		13.0917	2637.29		6.09339	2548.12		14.0919	2616.9		7.092	2709.93		15.0926	2630.14		8.09193	3173.71		16.0913	2765.3
1.09291	3457.93		9.0944	2461.91		2.0929	3039.03		10.0933	2450.39		3.09271	2798.43		11.092	2885.19		4.09264	2684.65		12.0929	2549.09		5.09325	2707.72		13.0927	2512.14		6.09436	2357.08		14.0936	2507.08		7.09367	2592.65		15.0939	2473.34		8.09353	3025.6		16.0927	2616.93
1.09451	3208.62		9.09614	2373.42		2.09408	2758.68		10.0943	2301.38		3.09369	2650.88		11.0938	2767.97		4.09389	2606.67		12.0946	2426.21		5.09457	2494		13.0942	2371.6		6.09582	2256.64		14.0953	2243.7		7.09541	2429.42		15.0957	2344.85		8.09526	2814.49		16.0945	2463.47
1.09548	2964.83		9.0978	2157.64		2.09499	2610.84		10.0959	2135.67		3.09521	2502.94		11.0952	2547.97		4.09563	2510.03		12.0961	2212.96		5.09547	2335.46		13.096	2190.03		6.09755	2100.04		14.0964	2018.8		7.09638	2197.28		15.0971	2165.88		8.09638	2612.91		16.0958	2227.65
1.09638	2821.78		9.0987	2007.69		2.09645	2531.67		10.0976	1993.66		3.09702	2273.01		11.0962	2324.38		4.09716	2252.9		12.0971	2081.57		5.09686	2225.47		13.0973	2027.36		6.09887	1929.91		14.0974	1938.49		7.09728	2074.86		15.098	1894.17		8.09735	2458.66		16.0967	2102.82
1.09798	2666.3		9.09961	1934.41		2.09825	2354.84		10.0988	1833.88		3.0982	2048.25		11.0974	2246.47		4.09813	2033.18		12.0983	1975.35		5.09867	2079.99		13.0982	1826.82		6.09977	1773.66		14.099	1824.69		7.09874	2024.91		15.0992	1841.37		8.09894	2342.64		16.098	2018.13
1.09958	2350.47		9.1012	1795.72		2.09957	2112.42		10.0997	1705.52		3.0991	1974.36		11.0992	2097		4.09931	1918.71		12.1	1849.38		5.09999	1862.83		13.0996	1778.43		6.10109	1653.13		14.1007	1649.07		7.10041	1815.47		15.1011	1722.44		8.10075	2205.92		16.0999	1875.7
1.10069	2187.55		9.10287	1584.32		2.10047	1910.59		10.1013	1634.51		3.10063	1898.84		11.1007	1857.13		4.10105	1818.98		12.1016	1686.08		5.10082	1670.08		13.1014	1627.17		6.1029	1532.62		14.1018	1485.34		7.10159	1626.57		15.1026	1509.25		8.10179	2040.03		16.1013	1650.99
1.10166	2072.17		9.10391	1410.01		2.10186	1791.68		10.1031	1456.5		3.10251	1732.88		11.1015	1673.66		4.10264	1657.86		12.1026	1521.37		5.102	1634.63		13.1027	1448.76		6.10429	1366.02		14.1028	1401.04		7.10256	1540.81		15.1033	1401.44		8.10262	1877.4		16.1021	1519.17
1.10319	1905.87		9.10495	1348		2.10374	1619.39		10.1043	1295.4		3.10362	1491.1		11.1026	1634.95		4.10348	1448.3		12.1036	1421.64		5.10367	1531.83		13.1036	1318.38		6.10519	1216.23		14.1043	1322.11		7.10395	1463.08		15.1044	1343.21		8.10401	1808.19		16.1032	1448.21
1.10492	1752.2		9.10648	1272.35		2.10506	1420.55		10.1052	1212.04		3.10445	1395.48		11.1043	1522.9		4.10445	1353.41		12.1054	1329.2		5.10512	1327.61		13.105	1256.74		6.10651	1180.56		14.1062	1204.24		7.10569	1318.1		15.1061	1268.58		8.10575	1692.82		16.105	1315.81
1.10624	1562.24		9.10822	1157.33		2.10582	1338.23		10.1067	1142.77		3.10584	1284.26		11.1058	1353.65		4.10611	1302.63		12.107	1187.69		5.10617	1204.46		13.1069	1137.2		6.10832	1082.06		14.1073	1068.64		7.10707	1157.4		15.1076	1103.4		8.107	1532.87		16.1064	1198.6
1.10715	1390.65		9.10954	1015.6		2.10707	1295.7		10.1085	1066.57		3.10751	1184.81		11.1068	1252.99		4.10764	1176.88		12.1079	1071.21		5.10728	1144.39		13.1082	1019.28		6.10977	900.846		14.108	936.112		7.10805	1050.48		15.1087	986.174		8.1079	1460.83		16.1074	1115.93
1.10854	1288.48		9.11044	860.111		2.10874	1121.14		10.1097	918.91		3.10883	1066.36		11.1079	1177.26		4.10875	1016.1		12.1088	998.75		5.10894	1063.59		13.109	926.256		6.11054	826.235		14.1095	920.44		7.1093	1016.32		15.1098	909.397		8.10929	1391.75		16.1085	1032.23
1.11034	1181.85		9.11183	809.45		2.1102	1012.86		10.1105	815.919		3.10973	971.116		11.1095	1077.48		4.1098	939.751		12.1104	917.667		5.11061	907.625		13.1102	859.824		6.11165	799.564		14.1112	820.264		7.1111	917.407		15.1114	842.378		8.1111	1334.51		16.1102	948.289
1.11166	1049.51		9.11364	754.862		2.11117	900.333		10.1119	796.721		3.11105	890.134		11.1113	958.286		4.11132	897.804		12.1121	808.946		5.11165	819.131		13.1119	758.885		6.11339	731.945		14.1124	727.022		7.11256	781.425		15.1131	760.376		8.11249	1192.18		16.1119	854.221
1.11256	916.369		9.11502	654.966		2.11235	831.039		10.1136	713.893		3.11278	835.569		11.1124	850.379		4.11306	854.03		12.1132	719.461		5.11269	741.844		13.1133	679.979		6.11484	647.403		14.1134	655.297		7.11346	709.739		15.1142	637.859		8.11339	1057.71		16.1129	744.11
1.11395	865.449		9.11593	597.401		2.11401	795.797		10.1149	619.16		3.11431	745.205		11.1133	775.866		4.11431	728.93		12.1142	632.539		5.11429	714.266		13.1143	641.378		6.11589	552.785		14.1147	601.281		7.11471	655.729		15.1151	609.948		8.11464	1011.11		16.1139	659.645
1.11576	800.154		9.11725	563.504		2.11561	703.932		10.1158	546.687		3.11521	632.586		11.1149	719.7		4.11521	657.34		12.1157	581.15		5.11603	620.544		13.1155	560.587		6.117	510.699		14.1165	565.335		7.11652	602.73		15.1167	565.12		8.11637	937.102		16.1156	645.437
1.11708	697.625		9.11905	494.779		2.11665	609.927		10.1172	526.708		3.11639	582.17		11.1166	636.1		4.11667	574.512		12.1175	550.653		5.11714	545.989		13.1172	524.027		6.11866	476		14.118	469.814		7.11805	509.366		15.1185	514.397		8.1179	859.523		16.1173	546.803
1.11791	623.389		9.12044	452.117		2.1177	567.282		10.1189	477.819		3.11813	556.501		11.1178	571.783		4.11848	501.916		12.1188	512.235		5.11804	519.02		13.1187	489.283		6.12033	435.345		14.1189	426.499		7.11888	465.048		15.1197	433.707		8.11888	829.98		16.1184	471.938
1.11909	604.028		9.1212	427.349		2.11936	519.36		10.1204	411.074		3.11973	493.243		11.1188	512.375		4.11973	458.171		12.1197	467.834		5.11964	456.346		13.1198	408.674		6.12137	393.327		14.12	412.425		7.11992	459.647		15.1206	399.87		8.12006	790.315		16.1194	431.169
1.12076	566.113		9.12239	406.816		2.1211	462.087		10.1214	393.016		3.12077	416.8		11.1203	489.253		4.12063	437.912		12.1211	420.624		5.12144	414.34		13.1208	362.257		6.12241	362.114		14.1218	387.082		7.12159	404.251		15.1221	388.087		8.12186	800.268		16.1209	400.046
1.12222	498.877		9.12412	389.828		2.12214	419.061		10.1225	372.647		3.12181	387.586		11.1221	420.266		4.12209	387.896		12.1229	367.804		5.12255	374.654		13.1225	366.551		6.12394	344.822		14.1234	318.238		7.12312	353.286		15.1239	349.677		8.12339	752.917		16.1228	368.567
1.12326	440.957		9.12558	362.439		2.12311	352.168		10.1242	358.087		3.12355	358.615		11.1233	381.117		4.12389	361.025		12.1242	325.861		5.12332	364.1		13.1242	342.397		6.12568	304.859		14.1243	288.584		7.12416	316.615		15.1251	288.391		8.12429	689.239		16.1238	320.638
1.12437	393.327		9.12655	297.779		2.12478	320.558		10.1258	309.75		3.12521	328.926		11.124	353.387		4.12514	332.66		12.1251	302.112		5.12478	329.102		13.1253	285.119		6.12686	273.595		14.1255	277.466		7.1252	294.639		15.1258	271.019		8.12526	655.276		16.1246	283.67
1.12604	390.58		9.12766	286.064		2.12651	308.906		10.1269	270.613		3.12612	297.287		11.1254	343.856		4.12598	289.768		12.1265	290.809		5.12651	279.527		13.1262	258.749		6.12783	252.281		14.1273	259.203		7.1268	272.88		15.1272	270.726		8.12693	596.241		16.126	283.41
1.1277	336.084		9.1294	260.312		2.12756	279.196		10.128	252.137		3.12702	281.835		11.1271	307.167		4.12723	283.35		12.1283	273.187		5.12769	257.941		13.1278	261.26		6.12936	236.087		14.1289	246.96		7.12853	253.399		15.129	252.886		8.12846	585.087		16.1278	264.797
1.12881	304.62		9.13107	251.237		2.12839	267.869		10.1297	243.706		3.12862	271.991		11.1284	267.911		4.12889	277.103		12.1297	252.859		5.12867	238.696		13.1297	233.507		6.13116	205.351		14.1297	232.934		7.12964	243.438		15.1302	232.442		8.12957	550.731		16.1289	241.535
1.12979	294.09		9.13211	240.763		2.12985	246.295		10.1313	224.81		3.13021	251.458		11.1294	243.086		4.13028	271.812		12.1305	231.816		5.12999	236.981		13.1307	198.948		6.13227	197.227		14.1307	216.472		7.13062	222.765		15.1312	212.246		8.13061	539.043		16.1299	225.046
1.13138	284.257		9.13308	232.242		2.13158	226.871		10.1323	212.443		3.13133	228.956		11.1306	249.588		4.13125	252.304		12.1317	229.737		5.13179	240.894		13.1315	187.663		6.13311	188.635		14.1323	202.273		7.13214	200.355		15.1325	202.64		8.13214	536.073		16.1313	203.257
1.13312	255.701		9.13475	212.869		2.13276	217.036		10.1332	200.329		3.1323	222.359		11.1324	228.625		4.13243	233.671		12.1333	212.592		5.13325	217.095		13.133	182.643		6.1345	190.204		14.1339	186.661		7.13388	187.886		15.1342	202.813		8.13387	505.653		16.1331	186.279
1.1343	217.033		9.13648	200.403		2.13374	201.969		10.1347	195.089		3.13383	211.256		11.134	201.134		4.13417	220.832		12.1348	189.315		5.13415	197.242		13.1347	176.953		6.13616	164.922		14.135	155.964		7.13513	186.282		15.1357	184.925		8.13506	486.447		16.1345	170.213
1.1352	229.755		9.13759	187.851		2.13513	200.412		10.1364	173.368		3.13563	204.062		11.1349	195.238		4.13577	200.069		12.1358	176.911		5.13533	179.199		13.1358	172.668		6.13748	152.4		14.1359	152.104		7.13603	166.694		15.1367	175.611		8.13596	467.076		16.1354	176.431
1.1368	227.662		9.13857	170.392		2.13693	177.329		10.1375	158.677		3.13688	183.282		11.1361	178.689		4.13681	168.826		12.137	181.397		5.13707	166.068		13.1368	161.648		6.13839	158.159		14.1375	152.626		7.13749	162.149		15.1378	160.852		8.13742	492.092		16.1366	168.143
1.13861	197.433		9.14016	181.65		2.13832	163.306		10.1385	143.93		3.13778	163.193		11.1378	161.597		4.13785	153.968		12.1386	150.032		5.13867	145.776		13.1382	139.528		6.13971	146.838		14.1393	153.321		7.1393	159.477		15.1396	156.676		8.13922	473.494		16.1384	147.884
1.13972	177.782		9.14197	174.102		2.13922	158.883		10.14	138.067		3.13917	148.207		11.1394	161.439		4.13952	159.563		12.1402	134.264		5.13964	155.492		13.14	143.53		6.14144	143.697		14.1405	138.287		7.14055	129.027		15.1412	135.248		8.14054	405.11		16.1399	143.724
1.14055	177.648		9.14301	167.278		2.14047	145.534		10.1417	136.095		3.14098	156.864		11.1404	151.159		4.14118	141.174		12.1413	159.125		5.14075	140.694		13.1414	134.052		6.14297	130.071		14.1414	122.156		7.14131	113.871		15.1422	120.131		8.14144	379.575		16.1408	139.012
1.14194	178.892		9.14377	168.263		2.14228	137.932		10.1431	111.691		3.14237	148.195		11.1415	136.889		4.14223	145.937		12.1423	147.118		5.14249	119.49		13.1423	131.219		6.14387	120.08		14.1428	132.221		7.14263	111.9		15.1432	137.44		8.14283	370.285		16.142	134.518
1.14367	170.177		9.14523	164.04		2.14374	124.604		10.144	129.123		3.14327	146.244		11.1432	136.751		4.1432	153.927		12.1439	137.852		5.14408	112.496		13.1435	125.791		6.14505	110.361		14.1446	117.345		7.14437	116.788		15.1449	123.289		8.14471	327.689		16.1438	125.702
1.14492	166.33		9.1469	145.194		2.14464	114.661		10.1454	120.05		3.14459	136.215		11.1449	114.133		4.14487	142.302		12.1456	125.636		5.14492	117.011		13.1453	113.937		6.14679	120.572		14.1459	121.342		7.14569	110.227		15.1466	107.742		8.14603	297.367		16.1453	101.047
1.1459	173.467		9.14815	148.174		2.14589	121.759		10.1472	111.64		3.14639	129.439		11.1458	124.915		4.1466	119.23		12.1467	131.538		5.14589	126.859		13.1469	100.686		6.14839	120.277		14.1468	115.356		7.14666	106.039		15.1475	110.656		8.14672	271.487		16.1462	105.696
1.14729	163.458		9.14912	141.78		2.14769	117.763		10.1485	104.709		3.14778	122.29		11.1467	120.745		4.14764	120.038		12.1477	114.175		5.14756	117.948		13.1478	103.415		6.14936	103.588		14.1482	101.957		7.14791	99.9436		15.1484	107.554		8.14804	251.956		16.1472	97.6532
1.14909	160.78		9.15044	147.193		2.14922	97.1492		10.1495	92.6667		3.14855	109.407		11.1483	109.916		4.14848	115.273		12.1493	115.625		5.14915	101.727		13.149	104.587		6.1504	95.7296		14.1501	99.8273		7.14957	97.0478		15.15	103.552		8.14971	261.335		16.1489	100.779
1.15048	155.483		9.15225	140.479		2.15006	89.1625		10.1508	104.587		3.14973	104.348		11.1499	106.958		4.15	115.768		12.1511	102.762		5.15019	97.8947		13.1508	93.8895		6.1522	96.9821		14.1514	88.748		7.15117	96.0964		15.1516	102.744		8.1511	218.679		16.1504	102.666
1.15145	139.567		9.1537	135.439		2.1511	91.778		10.1526	100.552		3.15146	100.737		11.1511	106.496		4.15167	124.33		12.1522	87.2478		5.15124	101.638		13.1524	97.0746		6.1538	99.544		14.1521	78.9242		7.15214	101.632		15.1527	100.182		8.15207	180.422		16.1514	96.5557
1.15263	140.259		9.15461	130.053		2.15276	94.5188		10.154	107.074		3.15292	96.1232		11.1521	108.318		4.15285	118.243		12.153	90.9191		5.15276	103.83		13.1531	83.5647		6.15471	100.131		14.1534	86.6216		7.15325	89.9826		15.1537	97.9156		8.15325	187.854		16.1525	74.6595
1.15444	132.734		9.15586	119.531		2.15429	98.1751		10.1548	105.81		3.1539	108.112		11.1536	98.4256		4.15375	113.102		12.1545	89.9528		5.1545	90.3972		13.1542	82.7237		6.15561	91.4738		14.155	75.3752		7.15492	88.7151		15.1552	92.3446		8.15499	187.791		16.1541	80.6152
1.15597	127.339		9.15766	130.975		2.15533	101.873		10.1559	112.917		3.15501	115.183		11.1554	89.3504		4.15521	107.889		12.1562	102.189		5.15575	77.1736		13.1558	83.848		6.1572	93.7135		14.1565	84.2029		7.15659	92.8755		15.1569	91.9897		8.15658	155.26		16.1558	93.1797
1.15694	133.226		9.15919	123.334		2.15638	95.7176		10.1576	91.9271		3.15667	100.063		11.1567	101.292		4.15695	107.074		12.1574	92.8457		5.15665	78.5454		13.1574	70.0667		6.15887	90.4688		14.1575	86.6037		7.15763	88.2022		15.1582	92.3178		8.15756	120.361		16.157	88.3125
1.15805	126.173		9.16009	138.407		2.15797	96.0457		10.1591	80.8567		3.15834	100.859		11.1576	94.5098		4.15834	107.2		12.1583	82.0825		5.15811	94.5903		13.1584	78.6289		6.15998	83.9911		14.1587	80.7613		7.15867	84.7606		15.1592	89.252		8.15867	118.407		16.1579	85.9863
1.15979	120.739		9.1612	145.976		2.15971	88.4617		10.1601	86.2935		3.15945	90.2958		11.159	85.8432		4.15924	100.907		12.1597	87.9099		5.15985	84.4445		13.1594	82.0288		6.16095	70.2188		14.1603	90.0005		7.16034	75.9419		15.1606	91.4142		8.16033	123.352		16.1594	86.8512
1.16138	129.573		9.16301	133.709		2.16089	78.9212		10.1613	90.0065		3.16042	80.5317		11.1608	87.3433		4.16056	94.3577		12.1615	88.065		5.16117	75.4349		13.161	82.491		6.16248	80.2811		14.162	74.8414		7.16207	77.7999		15.1623	94.4651		8.162	108.986		16.1612	86.4217
1.16229	127.554		9.16461	123.981		2.16179	82.8728		10.1629	85.703		3.16202	94.7275		11.1622	88.7748		4.1623	92.6488		12.1629	86.5261		5.16207	81.0565		13.1628	82.7266		6.16422	80.2543		14.163	74.9607		7.16305	79.0912		15.1637	85.8014		8.16311	99.4008		16.1624	92.9441
1.16326	126.084		9.16551	120.247		2.16332	96.1859		10.1645	88.3573		3.16376	89.3563		11.1631	88.3573		4.16382	96.8658		12.1638	84.8143		5.16346	80.5466		13.164	84.6681		6.16547	81.2206		14.1641	70.5379		7.16395	75.4975		15.1646	95.5327		8.16408	91.0921		16.1633	84.1015
1.16492	133.674		9.16648	144.482		2.16513	81.0536		10.1656	83.1621		3.16494	89.6307		11.1644	78.0832		4.16473	94.2653		12.165	77.9669		5.16533	85.542		13.1649	81.1609		6.16637	75.3901		14.1657	71.4415		7.16548	81.2444		15.1659	88.4915		8.16575	92.4431		16.1648	76.8753
1.16645	133.763		9.16808	139		2.16638	65.9063		10.1667	73.9318		3.16584	98.1124		11.1662	79.7443		4.16598	105.049		12.1668	59.1275		5.16665	75.9747		13.1664	75.8017		6.16776	70.0398		14.1674	79.3566		7.16707	82.998		15.1677	85.1304		8.16749	91.5931		16.1666	78.3277
1.16756	131.974		9.16968	124.255		2.16728	77.6746		10.1682	80.6271		3.16744	88.566		11.1676	75.3573		4.16778	106.403		12.1683	62.0144		5.16742	69.6432		13.1682	76.1894		6.16957	65.6111		14.1684	74.1465		7.16825	73.0192		15.1691	88.3066		8.16853	86.6573		16.1679	77.2332
1.16861	127.825		9.17072	110.674		2.16874	84.6025		10.1699	74.7937		3.16924	79.8934		11.1684	67.4094		4.16924	108.032		12.1693	72.9327		5.16867	72.6166		13.1694	72.8731		6.17089	73.1236		14.1694	70.5468		7.16923	72.2557		15.1699	75.3245		8.16936	87.4059		16.1687	71.6264
1.17013	126.943		9.17176	117.846		2.17054	72.9416		10.1711	71.6294		3.17035	94.2682		11.1695	89.4577		4.17007	100.677		12.1704	83.7466		5.17033	75.4498		13.1703	69.4374		6.17179	80.1618		14.1711	76.6606		7.17069	70.3619		15.171	77.0006		8.17082	88.1545		16.1699	79.2045
1.17187	124.509		9.17329	131.595		2.17179	77.0423		10.1721	86.8721		3.17112	97.4116		11.1713	79.3477		4.17118	93.0007		12.1722	85.1781		5.17179	77.5911		13.1718	70.4484		6.17318	70.6035		14.1729	62.584		7.17242	80.4004		15.1728	84.695		8.17249	78.0891		16.1716	86.9228
1.17312	126.776		9.17509	120.232		2.17263	76.425		10.1736	78.2711		3.17258	88.6316		11.1727	80.1917		4.17285	88.9179		12.1738	78.0504		5.17276	88.3215		13.1737	68.4204		6.17498	65.3427		14.1739	65.9541		7.17374	82.2972		15.1742	83.6034		8.17367	74.6207		16.173	78.1339
1.17402	130.542		9.17627	128.821		2.17388	78.8079		10.1754	83.6631		3.17431	89.6993		11.1738	77.0841		4.17438	98.3063		12.1747	67.2812		5.17387	84.4743		13.1749	75.7987		6.17637	68.9274		14.1747	65.7274		7.17464	74.2121		15.1753	85.5569		8.17464	84.4266		16.174	76.3952
1.17548	133.483		9.17718	120.933		2.17561	78.3516		10.1765	86.6872		3.17556	94.8856		11.1749	74.4805		4.17535	94.6172		12.1757	69.0378		5.17561	89.9976		13.1757	69.008		6.17714	76.2192		14.1762	77.7551		7.17596	64.5643		15.1764	87.6654		8.1761	81.8469		16.1752	69.8311
1.17722	134.002		9.17864	105.607		2.177	78.5514		10.1774	75.0263		3.17653	96.156		11.1765	69.336		4.17646	83.7555		12.1773	72.2885		5.17721	86.3889		13.1769	63.7054		6.17832	76.6487		14.1779	70.019		7.17777	75.7659		15.1781	73.8334		8.17783	77.5165		16.1769	77.3316
1.17854	136.692		9.18051	113.85		2.17797	71.7756		10.1788	84.1134		3.17785	92.3536		11.1781	67.138		4.17806	96.338		12.179	70.013		5.17825	80.8388		13.1787	73.8125		6.18005	70.0309		14.1791	68.4354		7.17923	84.1313		15.1797	75.2708		8.17922	79.9799		16.1785	79.4282
1.17944	113.549		9.18183	121.706		2.17915	74.573		10.1804	75.8554		3.17959	90.4389		11.1792	74.5103		4.1798	103.982		12.18	64.1319		5.17929	83.8808		13.1801	84.5488		6.18151	81.99		14.18	70.8689		7.18013	77.9579		15.1808	83.0726		8.18012	73.5232		16.1796	78.444
1.18083	119.558		9.18266	127.145		2.18096	78.1726		10.1817	71.7338		3.18105	92.7651		11.1803	66.0048		4.18091	87.9755		12.1811	72.6345		5.18096	84.4534		13.181	81.1251		6.18255	66.4461		14.1814	65.5336		7.18138	83.2486		15.1818	89.4577		8.18138	67.8657		16.1806	79.2701
1.1827	115.893		9.18405	121.136		2.18256	69.6551		10.1826	68.829		3.18195	102.115		11.1818	60.4755		4.18188	84.179		12.1826	70.9912		5.18269	76.6069		13.1822	73.3293		6.18366	77.0095		14.1832	65.7721		7.18325	83.6601		15.1833	79.1926		8.18318	82.2733		16.1823	68.2206
1.18402	124.05		9.18593	123.62		2.18353	80.2573		10.184	73.046		3.18313	97.4593		11.1836	67.5914		4.18334	88.5064		12.1843	79.1717		5.18374	79.4968		13.184	66.7742		6.18533	79.3864		14.1846	64.0603		7.18471	89.5084		15.1851	71.5489		8.18471	87.7459		16.1839	66.1569
1.18479	118.07		9.18718	124.318		2.18457	85.2885		10.1858	74.6267		3.18494	96.0874		11.1847	84.0418		4.18514	90.4747		12.1856	65.7423		5.18471	82.9265		13.1855	59.1693		6.187	72.2796		14.1855	70.7765		7.18548	77.5016		15.1862	86.5291		8.18561	86.1205		16.185	74.0481
1.18604	116.308		9.18794	117.772		2.18631	80.7613		10.1872	71.8442		3.18646	88.8255		11.1856	84.4355		4.18639	92.8188		12.1865	65.1339		5.18631	78.6707		13.1865	66.8249		6.18804	77.4628		14.1868	71.0986		7.18659	76.9827		15.1872	87.6266		8.18679	94.3607		16.186	78.1786
1.1877	120.024		9.18919	115.276		2.18797	84.7725		10.1882	78.9719		3.18744	83.9792		11.1872	84.4892		4.1873	91.4798		12.1879	74.6326		5.18811	62.1427		13.1876	68.0477		6.18908	82.7475		14.1885	74.1823		7.18825	80.9522		15.1887	87.4715		8.18867	84.4594		16.1877	68.6203
1.18916	120.581		9.19093	119.123		2.18901	86.4337		10.1893	94.3428		3.18855	83.0517		11.189	76.6606		4.18875	100.328		12.1897	78.5842		5.18915	67.7166		13.1892	71.1731		6.19068	76.5801		14.19	80.6957		7.18978	74.6267		15.1906	83.6243		8.19013	80.0754		16.1894	72.2885
1.19013	119.967		9.19232	125.04		2.19006	73.8691		10.1911	85.2348		3.19035	94.8886		11.1902	76.8097		4.19063	114.491		12.1911	70.2605		5.18999	73.7886		13.1909	63.4608		6.19241	77.0751		14.1909	80.7971		7.19082	73.5769		15.1917	79.3298		8.19096	74.3374		16.1904	76.0194
1.19131	144.771		9.19329	124.682		2.19172	69.2644		10.1927	81.6172		3.19195	91.274		11.1909	68.6441		4.19181	102.374		12.192	71.2566		5.19144	73.0281		13.192	64.3287		6.19352	64.4599		14.1921	73.4128		7.19193	66.4998		15.1924	83.1472		8.192	72.9506		16.1912	72.2468
1.19305	126.349		9.19447	124.631		2.19346	65.7304		10.1937	87.3791		3.19285	97.6323		11.1923	61.075		4.19264	96.5497		12.1933	76.6815		5.19311	85.7537		13.193	69.3599		6.19443	75.4229		14.1939	70.0279		7.19353	79.8726		15.1939	87.2836		8.19367	88.5511		16.1928	72.208
1.19465	110.826		9.19621	119.171		2.19443	79.6549		10.1948	77.3793		3.19383	98.3302		11.194	69.8848		4.19389	102.52		12.1952	69.5925		5.19429	79.795		13.1947	70.5439		6.19602	78.3546		14.1955	71.9873		7.1952	75.9598		15.1956	93.8239		8.19526	78.7035		16.1944	75.7808
1.19569	120.149		9.1978	124.178		2.19533	78.9093		10.1965	74.5491		3.19542	92.6309		11.1954	70.174		4.19563	98.7447		12.1965	65.5455		5.19526	68.9901		13.1964	76.1954		6.19783	73.3144		14.1964	64.5882		7.19631	66.5356		15.1969	86.0847		8.19624	71.0747		16.1956	69.509
1.19673	120.656		9.19884	117.462		2.19686	72.9923		10.1981	84.3848		3.19702	88.9836		11.1963	69.9802		4.19695	95.494		12.1973	64.4927		5.19665	75.6317		13.1974	71.3938		6.19894	69.333		14.1974	61.579		7.19728	67.7136		15.1978	83.6959		8.19735	76.1864		16.1966	65.6439
1.1984	124.088		9.19989	116.633		2.19853	67.9224		10.199	67.2484		3.19813	84.4415		11.1976	72.5659		4.19792	95.9234		12.1986	74.2002		5.19839	84.7844		13.1983	66.6281		6.1997	71.9992		14.1991	70.9047		7.19881	56.7954		15.1991	88.9836		8.19894	85.366		16.198	80.7404
1.20006	127.277		9.20155	123.483		2.19971	78.9242		10.2	78.1518		3.1991	90.5373		11.1994	67.4094		4.19917	98.7447		12.2003	74.8235		5.19978	85.1632		13.1998	64.6568		6.20116	64.0543		14.2006	73.0192		7.20062	59.6494		15.2008	79.9292		8.20061	80.2811		16.1998	80.2394
1.20117	125.404		9.20322	124.25		2.20061	80.2543		10.2016	81.5516		3.20063	85.9923		11.2008	59.1752		4.20091	92.3446		12.2017	72.8522		5.20075	75.2291		13.2015	67.8836		6.2029	68.0566		14.2016	65.5007		7.2018	72.6941		15.2024	77.0185		8.20179	78.8496		16.2012	72.1126
1.20222	130.265		9.20433	126.686		2.20207	72.4704		10.2033	81.483		3.20237	86.5231		11.2018	69.6939		4.20243	93.7046		12.2027	74.4954		5.202	67.5973		13.2026	71.525		6.20408	63.5384		14.2026	65.7513		7.2027	81.7395		15.2033	79.3447		8.20276	78.5961		16.2021	75.6049
1.20381	128.61		9.2053	127.044		2.20388	69.3032		10.2043	88.3334		3.20362	86.7677		11.203	72.2766		4.20341	93.2781		12.2039	78.9719		5.20374	75.7182		13.2036	66.9054		6.20505	60.8662		14.2042	69.2167		7.20423	74.2211		15.2044	74.9219		8.20422	77.7253		16.2033	80.5824
1.20562	112.535		9.20697	132.525		2.2052	74.6714		10.2053	86.708		3.20452	89.3563		11.2047	66.6012		4.20459	103.233		12.2056	72.9476		5.20526	75.1307		13.2051	77.7253		6.20644	66.5654		14.2059	70.4782		7.20603	75.0084		15.2062	85.023		8.20603	78.963		16.2051	76.6904
1.20666	112.252		9.2087	131.109		2.2061	76.4787		10.2068	81.5725		3.20598	97.9514		11.2063	58.4953		4.20625	102.464		12.2072	76.5592		5.20624	73.1295		13.2068	84.1254		6.20818	64.4331		14.2071	67.7494		7.20721	68.0864		15.2078	77.7104		8.20728	87.5312		16.2066	65.4978
1.20742	108.214		9.20968	128.962		2.20742	68.6203		10.2086	74.2032		3.20778	88.9508		11.2073	61.5372		4.20792	96.0755		12.2082	65.1041		5.20742	72.6553		13.2082	77.0334		6.20964	62.7391		14.2081	66.5923		7.20798	68.7097		15.2087	69.4106		8.20818	83.3917		16.2075	65.8199
1.20888	107.96		9.21058	121.348		2.20922	67.1052		10.2099	83.7675		3.2091	86.6216		11.2084	61.4358		4.20896	94.8826		12.2092	66.5028		5.20922	68.2266		13.2091	67.8985		6.21061	64.9818		14.2096	65.0594		7.20937	68.5904		15.2099	84.9932		8.20964	69.0974		16.2087	65.2502
1.21062	107.936		9.21204	138.329		2.21068	68.999		10.2108	87.4417		3.21001	90.7968		11.2101	70.9405		4.21	92.8099		12.2109	78.948		5.21075	72.1006		13.2103	72.721		6.21179	66.9621		14.2114	72.8283		7.21103	63.8068		15.2116	89.8425		8.21151	67.317		16.2105	63.3654
1.2118	115.264		9.21371	140.634		2.21158	62.8077		10.2122	84.1522		3.21139	89.243		11.2118	78.8049		4.21167	99.7676		12.2126	74.1972		5.21158	68.7127		13.2122	66.6102		6.21352	64.0334		14.2126	79.3864		7.21235	65.8825		15.2133	97.5309		8.21276	68.0685		16.212	74.7967
1.21277	113.847		9.21488	127.441		2.21283	69.4136		10.214	81.3637		3.2132	92.7801		11.2127	72.1812		4.21341	90.4538		12.2137	63.8336		5.21255	77.5523		13.2136	72.4257		6.21505	66.8905		14.2135	65.7572		7.21325	66.7444		15.2141	87.7787		8.21346	66.0793		16.2128	71.3729
1.21416	112.705		9.21586	129.949		2.21464	78.2532		10.2154	84.9574		3.21459	85.7328		11.2137	73.1057		4.21431	87.5819		12.2147	71.0508		5.21422	72.8402		13.2145	70.7317		6.21602	62.247		14.215	58.6563		7.21457	65.8109		15.2151	81.4771		8.21478	78.6379		16.2139	64.0961
1.21597	124.36		9.21732	121.706		2.2161	73.2816		10.2163	69.9146		3.21535	94.7603		11.2153	76.079		4.21521	90.1854		12.2163	69.503		5.21582	87.7041		13.2158	68.7396		6.21714	64.776		14.2168	69.2048		7.21638	68.0327		15.2167	87.3731		8.21651	78.0712		16.2156	62.3753
1.21736	119.991		9.21905	123.236		2.21693	81.0058		10.2176	75.578		3.21653	88.4497		11.2169	70.5647		4.21674	95.2613		12.2181	70.3232		5.21686	93.0813		13.2176	69.2048		6.21894	59.8552		14.2181	68.7694		7.21784	68.8738		15.2183	75.5691		8.21783	75.2708		16.2171	70.0309
1.21833	120.617		9.22044	131.115		2.21804	72.5599		10.2195	79.0017		3.21827	77.0304		11.218	55.8738		4.21841	88.0411		12.2191	80.7017		5.2179	80.2543		13.2191	73.7499		6.22047	75.3603		14.2189	68.1312		7.21881	67.481		15.2194	74.224		8.21881	86.7587		16.2181	74.2718
1.21958	118.655		9.22141	133.906		2.21971	71.0508		10.2208	79.0196		3.21973	74.8802		11.219	67.9522		4.21952	92.3774		12.2199	77.0573		5.21943	79.9322		13.2199	69.3748		6.22137	82.4374		14.2201	64.4808		7.21999	75.4438		15.2203	85.0827		8.22006	82.8459		16.2192	75.3245
1.22131	119.418		9.22266	132.406		2.22124	83.9733		10.2216	71.9634		3.2207	77.4181		11.2205	79.2105		4.22056	97.0806		12.2214	66.3269		5.22117	73.0788		13.221	66.7116		6.22234	78.6945		14.2218	61.5283		7.22173	88.566		15.2219	85.5628		8.22179	80.5287		16.2208	79.3119
1.22284	119.913		9.2244	126.06		2.22221	72.032		10.2228	82.7923		3.22188	88.3304		11.2223	76.1596		4.22202	93.0485		12.2231	62.7153		5.22242	73.9795		13.2226	70.1323		6.22401	73.8811		14.2232	74.6595		7.22332	87.8801		15.2237	80.0664		8.22332	79.7384		16.2225	78.6886
1.22374	118.052		9.22593	124.109		2.22332	64.4092		10.2245	88.0829		3.22355	96.9613		11.2236	51.2035		4.22375	102.529		12.2242	60.3861		5.22332	80.1261		13.2242	68.8469		6.22561	61.8683		14.2242	78.277		7.2243	79.4312		15.2249	71.033		8.22429	79.1687		16.2237	75.074
1.22492	118.965		9.22683	118.389		2.22499	63.431		10.2259	70.5021		3.22514	89.8574		11.2245	64.1766		4.22507	107.716		12.2252	70.007		5.22478	64.1945		13.2252	72.6076		6.22665	60.1892		14.2254	66.6907		7.22534	76.2818		15.2258	68.0268		8.2254	72.205		16.2246	72.4913
1.22673	118.55		9.22801	124.354		2.22665	69.5895		10.2269	62.6288		3.22619	85.6613		11.2259	74.8921		4.22598	107.003		12.2267	73.8691		5.22658	65.6976		13.2262	67.2514		6.22769	58.6772		14.2271	74.1495		7.22707	74.7758		15.2273	74.1435		8.22714	86.708		16.2262	69.9146
1.22826	115.693		9.22989	126.558		2.22776	77.8505		10.228	82.0795		3.22723	91.4649		11.2276	66.139		4.2273	98.7865		12.2284	65.7453		5.2279	72.1185		13.2279	72.9834		6.22922	65.9034		14.2287	70.0846		7.22874	67.2126		15.229	90.3942		8.22874	92.3685		16.228	84.5995
1.22909	106.845		9.23134	128.088		2.22874	82.6521		10.2297	85.035		3.22889	84.5787		11.229	64.3854		4.2291	94.7931		12.2298	61.6625		5.22881	69.7416		13.2297	76.8038		6.23102	65.3278		14.2297	73.6037		7.22971	86.7707		15.2303	90.5791		8.22978	86.8065		16.2291	74.6833
1.23013	102.52		9.23218	146.19		2.23026	83.4842		10.2314	86.4098		3.23056	89.7769		11.2299	74.6177		4.23049	96.2217		12.2307	69.0318		5.23019	85.3958		13.2308	74.2569		6.23221	75.4587		14.2307	65.8228		7.23062	82.169		15.2312	74.7937		8.23082	82.6163		16.23	77.0781
1.2318	115.019		9.23322	152.617		2.23207	77.0215		10.2324	87.9606		3.23167	103.305		11.2313	71.194		4.23146	81.2593		12.232	62.9658		5.232	70.517		13.2317	81.3399		6.23311	74.0063		14.2325	72.2497		7.23221	66.4819		15.2326	85.4972		8.23249	81.9393		16.2316	79.2761
1.2334	128.893		9.23489	144.395		2.23325	75.4438		10.2335	73.0937		3.23264	92.8904		11.2331	61.0243		4.23271	100.638		12.2338	76.1685		5.23325	63.5324		13.2332	76.8395		6.23457	67.6152		14.2341	67.4124		7.23381	68.5338		15.2345	86.5977		8.23422	79.3745		16.2334	72.5629
1.23444	130.566		9.23641	122.752		2.23415	69.8728		10.2351	80.4064		3.23424	84.9336		11.2345	73.8423		4.23459	89.2281		12.2353	67.6898		5.23408	73.6425		13.235	77.3286		6.2363	66.1002		14.2352	61.8116		7.23492	70.9614		15.2358	84.7546		8.23519	84.1373		16.2346	71.8412
1.23548	120.59		9.23745	111.673		2.23568	76.8545		10.2368	78.4858		3.23605	90.0542		11.2352	66.7265		4.23605	77.4121		12.2362	70.9375		5.23533	86.9794		13.2362	74.8593		6.23762	75.0919		14.2362	73.6455		7.23589	73.6037		15.2366	77.7611		8.2361	69.682		16.2354	73.9884
1.23701	122.087		9.2385	126.555		2.23749	79.7622		10.238	70.6512		3.23709	84.516		11.2364	68.9692		4.23681	93.1916		12.2374	70.5886		5.23707	65.116		13.2371	70.4186		6.23852	64.958		14.2379	68.9364		7.23742	80.4929		15.2378	82.2644		8.23763	67.988		16.2367	72.7806
1.23874	109.654		9.24009	135.096		2.23867	81.8021		10.2389	72.4764		3.23792	87.5371		11.2381	68.2027		4.23792	98.9386		12.2392	75.6377		5.23839	78.8675		13.2386	69.9563		6.23991	66.6996		14.2396	66.3269		7.23916	68.7455		15.2394	80.9373		8.23922	61.9876		16.2384	68.1312
1.23992	108.1		9.24183	134.562		2.23943	83.5259		10.2405	78.456		3.23938	86.9705		11.2396	66.3835		4.23959	100.88		12.2407	71.3312		5.23936	91.778		13.2405	65.8348		6.24179	60.735		14.2406	63.0433		7.24048	64.3943		15.2409	90.7431		8.2404	69.9623		16.2397	72.715
1.2409	103.85		9.24301	141.061		2.24082	77.5314		10.2423	82.2435		3.24112	93.9551		11.2406	70.9286		4.24105	106.069		12.2415	78.0026		5.24061	85.1543		13.2417	68.2564		6.24311	65.9958		14.2414	69.9176		7.24138	69.8341		15.2419	88.408		8.24137	73.4785		16.2407	73.6693
1.24236	107.328		9.24398	128.07		2.24249	74.409		10.2433	76.8038		3.2423	90.8028		11.2417	82.1242		4.24202	91.2442		12.2426	75.4229		5.24228	74.9309		13.2424	63.941		6.24387	70.7019		14.243	77.5672		7.24277	62.4797		15.2431	80.141		8.24283	68.9364		16.2419	75.4736
1.24416	115.124		9.24544	121.261		2.24381	70.9316		10.2442	82.2047		3.24327	87.8204		11.2434	80.0575		4.24313	81.3995		12.2442	67.3677		5.24387	75.5721		13.2437	74.8324		6.24512	81.0923		14.2446	63.7949		7.2445	62.2053		15.2447	89.0223		8.24457	78.2472		16.2437	78.7393
1.24548	119.454		9.24718	125.943		2.24478	66.0077		10.2456	81.0953		3.24466	78.8884		11.2451	78.5603		4.2448	85.53		12.2458	67.2245		5.24492	68.6859		13.2455	75.2798		6.24679	78.9868		14.2457	72.8015		7.24589	68.3369		15.2464	85.5927		8.24596	76.7053		16.2452	83.7108
1.24638	108.205		9.2485	142.406		2.24603	58.1314		10.2473	82.7565		3.24639	86.8244		11.2461	73.6485		4.24653	79.8845		12.2468	75.5422		5.24596	72.9238		13.2469	66.4819		6.24825	67.5436		14.2467	73.4665		7.2468	70.4932		15.2474	87.1136		8.24686	75.3991		16.2462	76.1387
1.24777	105.932		9.2494	144.21		2.24776	55.3907		10.2485	69.0437		3.24778	82.1839		11.2471	69.3301		4.24764	86.1116		12.2479	83.6601		5.24762	78.1518		13.2478	65.459		6.24922	71.7696		14.2482	73.2876		7.24812	75.7748		15.2484	86.7617		8.24811	66.5118		16.2473	69.6223
1.24965	111.22		9.25086	124.443		2.24936	59.6047		10.2495	60.3622		3.24876	88.4736		11.2488	68.996		4.24855	88.8255		12.2495	84.7069		5.24929	82.9951		13.249	69.6581		6.2504	68.1222		14.2499	71.7756		7.24992	75.5422		15.2501	82.2018		8.24992	70.9345		16.249	61.4746
1.2509	121.595		9.25266	131.741		2.25033	63.1298		10.2508	71.695		3.24994	88.3573		11.2505	74.5521		4.25014	102.145		12.2512	79.5952		5.25033	78.4917		13.2508	72.047		6.25207	59.4019		14.2513	71.6861		7.25131	74.898		15.2518	86.4277		8.25138	74.1435		16.2506	71.9485
1.25166	125.627		9.25391	139.087		2.25144	79.0763		10.2526	75.1993		3.25174	73.3204		11.2516	80.3855		4.25188	92.4639		12.2524	77.6656		5.25137	93.1379		13.2523	65.5485		6.25366	71.7338		14.2522	63.2282		7.25214	77.0453		15.2528	78.7035		8.25228	76.7471		16.2516	78.3933
1.25298	127.855		9.25468	134.07		2.25318	80.4511		10.254	78.9868		3.25327	83.8957		11.2526	67.0724		4.25306	84.8053		12.2533	76.3534		5.25304	82.1988		13.2533	69.5448		6.2547	74.4507		14.2535	72.0798		7.25325	69.509		15.2538	77.3197		8.25353	81.7991		16.2527	73.5441
1.25465	119.227		9.256	140.357		2.25478	80.2304		10.255	75.2798		3.25417	91.0652		11.2542	68.8767		4.25403	101.814		12.2548	67.7107		5.25478	82.3867		13.2544	69.7178		6.25575	66.2135		14.2552	66.9442		7.25492	72.6106		15.2554	78.6945		8.25533	85.2527		16.2544	65.1906
1.25604	119.952		9.25773	131.231		2.25582	82.5149		10.2563	59.0738		3.25535	87.6534		11.2559	73.7797		4.25556	94.5456		12.2566	59.9745		5.25575	73.2757		13.2561	73.9049		6.25741	69.3658		14.2568	64.8297		7.25638	81.6262		15.2572	77.6448		8.25679	88.3036		16.2561	68.2176
1.25701	117.981		9.25905	116.665		2.25686	66.4104		10.258	69.1362		3.25716	83.5498		11.257	66.5058		4.25737	95.8996		12.2579	74.1823		5.25658	68.8469		13.2578	75.8256		6.25908	74.4656		14.2577	67.7971		7.25742	79.7056		15.2583	73.7439		8.25762	81.6321		16.257	65.7006
1.25819	110.769		9.25995	110.886		2.2586	68.7276		10.2595	64.6568		3.25876	84.5101		11.2578	59.6763		4.25848	89.9588		12.2588	80.6331		5.25811	77.3167		13.2587	71.6921		6.26019	81.8946		14.2589	66.5744		7.25853	80.5794		15.2591	73.559		8.25874	71.877		16.2579	68.4831
1.25993	111.256		9.2612	123.477		2.26026	69.5627		10.2605	71.4893		3.25959	89.6128		11.2592	65.1041		4.25931	92.4729		12.2603	76.756		5.25978	80.0426		13.2598	72.7985		6.26116	64.6717		14.2607	70.1949		7.2602	77.3316		15.2606	79.6101		8.2604	71.2954		16.2594	76.3683
1.26152	124.354		9.26294	124.339		2.26124	75.3096		10.2616	75.7421		3.26063	92.0732		11.2609	64.4897		4.2607	104.381		12.2621	73.0967		5.26096	71.4415		13.2615	75.7063		6.26276	53.0466		14.2622	80.0873		7.26187	80.7464		15.2622	81.7604		8.26193	75.5482		16.261	67.8091
1.26249	123.91		9.26454	121.19		2.26214	77.5016		10.2634	70.3411		3.2623	78.7452		11.2622	71.534		4.26236	102.309		12.2633	81.1311		5.26193	67.6063		13.2632	74.6624		6.2645	66.0793		14.263	74.8772		7.26291	75.1098		15.2635	95.1898		8.2629	76.1178		16.2622	69.0259
1.26361	113.638		9.26551	132.445		2.26374	80.5197		10.265	69.3032		3.26383	78.0325		11.2631	68.8887		4.26368	95.7475		12.2642	76.6218		5.26332	64.9311		13.2642	71.8322		6.26554	68.2385		14.2641	67.9313		7.26395	77.6328		15.2644	85.5748		8.26401	85.0022		16.2632	59.381
1.26527	110.576		9.26662	139.534		2.26533	85.7984		10.2658	77.263		3.26487	89.1327		11.2645	68.4443		4.26466	99.1682		12.2654	57.8034		5.26512	73.1922		13.2651	71.3163		6.26637	63.8515		14.2658	64.8596		7.26548	70.1919		15.2658	81.486		8.26561	85.4376		16.2646	63.1328
1.26694	105.008		9.26829	127.011		2.26651	87.2628		10.2669	68.1431		3.26591	96.7525		11.2663	64.5583		4.26591	89.6784		12.2672	58.9933		5.26651	81.5725		13.2666	70.5946		6.26783	60.4189		14.2673	62.7839		7.26721	72.5808		15.2676	89.6814		8.26728	74.0362		16.2664	68.9781
1.26805	113.06		9.26995	129.543		2.26749	78.8258		10.2685	72.4943		3.26751	87.0898		11.2677	70.5677		4.26764	92.9202		12.2686	68.7217		5.26742	91.942		13.2683	61.1585		6.2695	71.2715		14.2683	59.7926		7.26839	68.8588		15.269	81.7812		8.26839	73.6783		16.2677	71.2149
1.26902	110.131		9.271	139.784		2.26901	75.5631		10.2701	65.3755		3.26924	87.5282		11.2687	76.2968		4.26917	98.5061		12.2695	81.7067		5.26874	89.6486		13.2694	62.2858		6.27068	77.4121		14.2694	62.4379		7.2693	76.6725		15.2699	80.812		8.26943	78.1488		16.2687	72.4078
1.27069	113.635		9.27204	130.399		2.27075	75.5989		10.2711	63.5742		3.27035	98.1005		11.2699	69.4971		4.27014	92.1746		12.2707	80.7523		5.27047	81.8379		13.2704	63.1179		6.27165	73.9348		14.271	69.1958		7.27089	75.8375		15.2711	73.3562		8.27096	68.0447		16.27	69.9742
1.27242	104.572		9.27377	118.103		2.27207	77.3316		10.2722	87.4477		3.27133	93.8119		11.2716	68.9125		4.27132	97.006		12.2725	79.6489		5.27193	78.3874		13.2719	73.4814		6.27304	65.7483		14.2727	67.9045		7.2727	73.0729		15.2729	78.5723		8.27269	79.2552		16.2718	65.3487
1.2734	123.504		9.27544	131.661		2.27304	77.9311		10.2737	82.5328		3.27278	97.2058		11.2731	71.5728		4.27306	94.0744		12.2741	72.1871		5.2729	77.4867		13.2736	85.1185		6.27477	67.7703		14.2739	77.2541		7.27381	71.1701		15.2744	80.7792		8.27387	83.1293		16.2732	76.1059
1.2743	119.976		9.27641	124.578		2.27436	80.982		10.2754	71.7636		3.27459	87.6952		11.2741	69.3479		4.27466	96.165		12.2751	70.6005		5.27408	81.0506		13.2749	74.2569		6.27616	68.3519		14.2748	69.3271		7.27464	74.4746		15.2753	93.9521		8.27485	75.0323		16.2741	84.9425
1.27583	109.12		9.27732	128.565		2.27617	87.0808		10.2767	66.2374		3.27584	87.5073		11.2753	66.64		4.27563	90.597		12.2762	69.3479		5.27589	76.0492		13.2758	80.9373		6.27714	70.2188		14.2764	73.6365		7.27603	79.4401		15.2765	93.0843		8.27637	70.5021		16.2754	79.6489
1.27742	133.659		9.27884	128.979		2.27756	75.6675		10.2776	61.2569		3.27674	85.6583		11.277	71.7249		4.27674	91.9838		12.2779	68.7634		5.27742	73.7439		13.2772	68.5308		6.27839	67.8717		14.2782	79.3954		7.2777	82.8907		15.2783	79.8487		8.27818	71.4684		16.2772	74.6446
1.27861	119.15		9.28044	143.077		2.27846	77.0751		10.279	66.2195		3.27827	87.0987		11.2786	73.6425		4.27848	84.516		12.2795	70.0876		5.27825	83.0249		13.279	70.5767		6.28019	75.2559		14.2793	76.7859		7.27902	79.2254		15.2799	70.6363		8.27936	75.0949		16.2787	69.7685
1.27958	118.843		9.28162	145.302		2.27978	78.441		10.2808	73.0759		3.28008	81.3727		11.2795	62.0114		4.28014	101.172		12.2806	72.4168		5.27929	84.5459		13.2804	63.8933		6.28172	73.3443		14.2803	70.6721		7.27999	76.0552		15.2808	84.3132		8.28012	77.4211		16.2794	65.0206
1.28104	122.711		9.28259	121.342		2.28158	72.8164		10.2822	73.7588		3.28133	90.1318		11.2805	68.5904		4.28105	98.4077		12.2816	80.8746		5.28096	79.0644		13.2813	61.755		6.28262	72.1305		14.2818	70.0249		7.28131	75.6466		15.2817	90.0274		8.28151	87.4536		16.2805	79.0733
1.28277	119.484		9.28405	126.31		2.28297	72.6225		10.2831	70.0249		3.28216	93.8269		11.2821	72.1543		4.28195	102.514		12.2833	66.6102		5.28249	86.0609		13.2826	57.7885		6.2838	71.7636		14.2837	71.6652		7.28305	73.7051		15.2834	87.4894		8.28318	90.8952		16.2823	75.748
1.28416	139.236		9.28579	127.649		2.28381	69.3002		10.2845	61.9518		3.28341	85.536		11.2837	77.442		4.28355	93.9581		12.285	66.643		5.28353	91.3843		13.2844	70.9435		6.28561	83.6333		14.2848	69.3122		7.2845	74.409		15.2849	93.2423		8.2845	83.5468		16.2838	85.8611
1.28506	113.567		9.28711	117.524		2.28492	80.2155		10.2863	79.0286		3.28514	68.1461		11.2848	80.0217		4.28514	79.6549		12.286	65.5992		5.28457	85.8283		13.2859	71.9455		6.28714	72.539		14.2856	71.2298		7.28548	68.1252		15.286	75.8763		8.28547	84.1969		16.2848	71.2865
1.28638	110.209		9.28801	120.692		2.28665	71.0658		10.2876	80.7643		3.28653	82.0616		11.2858	82.4761		4.28625	67.1321		12.2868	60.3413		5.28617	81.653		13.2867	69.0259		6.28797	73.9109		14.2869	76.0343		7.28666	65.7244		15.287	73.8304		8.28672	79.5505		16.2859	62.0323
1.28819	100.877		9.2894	125.896		2.28811	73.7976		10.2883	73.2906		3.28751	81.4562		11.2874	65.802		4.2873	81.9304		12.2883	65.1071		5.2879	85.2646		13.2878	70.0965		6.28901	70.0995		14.2887	68.4204		7.28839	75.1665		15.2886	79.7801		8.28846	84.6413		16.2875	73.1683
1.28965	124.303		9.2912	131.231		2.28915	80.141		10.2896	66.7503		3.28869	91.1129		11.2891	63.768		4.28875	92.3238		12.2899	84.4236		5.28901	89.7828		13.2895	67.7256		6.29068	70.4932		14.29	77.4151		7.28992	70.4395		15.2903	81.4621		8.28999	91.9629		16.2892	75.2708
1.29055	121.929		9.29259	130.539		2.29026	69.1809		10.2913	65.0117		3.29042	99.3531		11.2904	73.8453		4.29056	91.8168		12.2911	74.6595		5.28999	76.9558		13.291	72.5271		6.29221	80.1022		14.2909	76.0612		7.29089	78.3188		15.2915	85.4107		8.29096	81.6948		16.2903	69.2078
1.2918	106.332		9.2935	139.6		2.29186	67.314		10.2927	61.7371		3.29202	95.6103		11.2913	65.4888		4.29181	99.4903		12.2922	79.0584		5.29151	62.6347		13.292	72.6703		6.29325	67.3677		14.2921	70.0995		7.29207	83.2664		15.2925	93.6658		8.29214	75.3722		16.2912	73.0669
1.29361	115.064		9.29482	135.442		2.29353	66.7682		10.2937	67.1023		3.29299	76.8634		11.2927	59.7419		4.29271	83.6959		12.2936	77.6418		5.29332	69.8728		13.2931	68.0298		6.29429	67.5586		14.2939	84.5399		7.29381	84.352		15.294	91.4738		8.29381	71.9485		16.2928	74.406
1.29506	106.505		9.29662	123.635		2.29464	75.3752		10.2949	75.238		3.2941	76.6248		11.2945	66.2374		4.2941	80.1469		12.2954	73.893		5.2945	70.3649		13.2948	74.4328		6.29589	71.8949		14.2955	67.3349		7.29541	65.8885		15.2957	84.6473		8.2954	81.3786		16.2946	79.4819
1.2959	103.32		9.29808	121.81		2.29568	70.6363		10.2965	68.9424		3.29577	85.5897		11.2958	71.3073		4.29591	93.296		12.2967	71.5489		5.2954	81.0804		13.2965	71.4684		6.29755	68.2296		14.2964	67.4154		7.29631	70.7914		15.297	80.6092		8.29644	81.6739		16.2958	74.8235
1.29701	105.133		9.29891	119.752		2.29721	72.6792		10.2982	68.1312		3.29744	81.4979		11.2967	69.6581		4.2973	86.1325		12.2976	79.8278		5.29693	72.2587		13.2976	69.3211		6.2988	64.5583		14.2975	65.9213		7.29728	74.7638		15.2979	77.0364		8.29749	78.277		16.2967	70.6184
1.29867	112.064		9.30002	119.931		2.29895	81.6858		10.2992	77.7372		3.29855	91.4499		11.2981	68.7097		4.2982	93.1678		12.2989	72.1185		5.29874	79.2493		13.2985	74.1733		6.29977	69.4643		14.2993	68.1848		7.29888	73.4337		15.2994	85.7358		8.29922	72.6911		16.2982	61.6983
1.3002	109.908		9.30169	114.745		2.30013	69.6521		10.3003	66.9382		3.29952	100.057		11.2999	69.0259		4.29952	89.4756		12.3007	74.0063		5.29999	79.3507		13.3001	70.5498		6.30123	81.656		14.3009	70.0309		7.30048	70.1412		15.3012	96.5527		8.30089	66.1807		16.3	66.4283
1.30124	98.0558		9.30315	113.125		2.30103	73.2667		10.302	76.8664		3.30119	88.8792		11.3013	78.6558		4.30132	84.3311		12.3022	76.7829		5.30075	75.8106		13.3019	73.1862		6.30304	85.3958		14.3019	73.5143		7.30159	77.3018		15.3024	89.917		8.30186	73.1504		16.3012	72.9148
1.30229	113.119		9.30419	129.337		2.30263	77.2929		10.3036	67.9045		3.30292	92.5564		11.302	81.3906		4.30271	77.0423		12.3031	71.7875		5.30207	70.5349		13.3031	77.2929		6.30429	85.0529		14.303	74.4507		7.30256	72.2318		15.3033	78.283		8.30276	72.6494		16.3019	81.3458
1.30388	114.172		9.3053	119.94		2.30443	72.2587		10.3047	67.3886		3.30396	84.352		11.3033	76.2103		4.30355	79.3		12.3043	77.3764		5.30381	72.6613		13.304	78.0265		6.30519	78.6289		14.3046	70.1442		7.30409	68.4145		15.3045	93.4421		8.30429	79.0077		16.3033	72.0499
1.30562	106.263		9.3069	108.228		2.30554	72.1871		10.3057	67.1231		3.3048	90.6954		11.3049	72.4794		4.30473	84.7785		12.3061	71.2596		5.30512	70.6124		13.3056	70.9017		6.30665	65.7602		14.3064	68.4294		7.30589	82.667		15.3062	90.6477		8.30596	65.5753		16.305	70.2188
1.3068	111.936		9.30857	107.077		2.30631	65.0713		10.3073	70.3381		3.30633	88.6257		11.3064	76.422		4.30639	76.932		12.3076	74.8414		5.30603	67.5466		13.3074	70.52		6.30845	56.3331		14.3073	71.701		7.30714	81.313		15.3076	76.3176		8.30707	74.4746		16.3064	66.3328
1.30777	105.118		9.30968	118.902		2.3077	69.2943		10.309	76.8246		3.30799	81.6977		11.3074	66.6698		4.30785	85.2676		12.3084	72.6166		5.30728	69.0676		13.3085	67.4661		6.30964	70.5289		14.3082	69.9713		7.30805	78.1637		15.3085	70.9763		8.30804	73.1683		16.3073	68.2833
1.30923	100.012		9.31072	108.688		2.30943	74.0928		10.3101	66.7444		3.30917	95.6938		11.3086	79.7831		4.30882	77.0453		12.3095	62.1218		5.30901	79.5863		13.3093	67.1142		6.31047	76.6904		14.3097	75.6794		7.30943	75.9359		15.3098	87.9457		8.30957	68.7157		16.3086	80.3855
1.31104	110.817		9.31225	110.576		2.31075	73.55		10.311	68.9036		3.31015	96.8748		11.3102	77.767		4.31	85.0827		12.3112	74.2718		5.31061	72.7239		13.3107	79.6549		6.31172	70.9703		14.3114	73.7797		7.31124	67.994		15.3115	96.3052		8.31131	80.642		16.3103	70.4276
1.31229	106.812		9.31405	109.081		2.31172	77.2571		10.3124	68.3996		3.3116	86.4158		11.3118	84.2059		4.31167	91.2561		12.3127	76.3326		5.31158	71.6921		13.3124	77.6806		6.31345	71.2507		14.3125	70.6661		7.31256	65.6827		15.3131	89.5204		8.31262	76.1208		16.3119	61.1018
1.31319	110.349		9.31523	105.592		2.31304	87.4566		10.3141	66.7116		3.31334	80.475		11.3129	73.5888		4.31327	85.5002		12.3138	66.81		5.31269	74.4567		13.3137	79.5087		6.31484	70.7109		14.3135	63.9827		7.31346	70.2158		15.3141	94.9989		8.31353	77.609		16.3128	65.8169
1.31465	107.966		9.31614	106.302		2.31478	87.4328		10.3153	69.3688		3.31473	91.7333		11.314	73.8095		4.31438	88.8881		12.3149	71.7994		5.31436	81.4472		13.3147	79.3149		6.31575	63.0821		14.315	64.0454		7.31485	69.0945		15.3151	81.9393		8.31492	82.5745		16.3139	69.4136
1.31645	112.89		9.31766	101.664		2.31631	68.8708		10.3163	68.8022		3.31563	95.8638		11.3156	70.0458		4.31535	97.7426		12.3165	79.1568		5.31603	70.1949		13.316	77.773		6.317	69.2108		14.3168	66.1539		7.31666	79.8487		15.3168	71.3193		8.31665	84.5459		16.3157	62.4319
1.3177	119.016		9.31947	110.778		2.31721	73.3413		10.3176	71.0151		3.31695	86.7677		11.3173	63.2789		4.31702	96.8718		12.3182	78.6647		5.31707	66.7772		13.3177	73.3502		6.31873	69.2734		14.318	66.5475		7.31798	69.0855		15.3185	83.0189		8.31804	84.1343		16.3173	59.9596
1.31847	115.392		9.32065	114.942		2.31839	75.6019		10.3195	83.1024		3.31869	89.589		11.3184	62.2679		4.31875	95.831		12.3193	67.0844		5.31811	76.7352		13.3192	66.9681		6.32033	72.879		14.319	69.0259		7.31881	67.8568		15.3196	88.8643		8.31894	74.8235		16.3183	64.9311
1.31979	107.274		9.32141	109.323		2.32013	73.1564		10.3208	81.6828		3.32015	86.6573		11.3194	75.8405		4.31987	95.315		12.3203	66.8338		5.31985	84.0687		13.3202	65.459		6.3213	77.9609		14.3203	66.634		7.31999	79.5803		15.3206	80.9909		8.32026	78.3993		16.3194	81.993
1.32152	117.76		9.3228	108.801		2.32172	66.5386		10.3217	67.9582		3.32112	98.2586		11.321	84.8381		4.32077	102.47		12.3218	66.0495		5.32151	68.7396		13.3214	69.6521		6.32241	69.7148		14.3221	63.3326		7.32166	82.5507		15.3222	89.8007		8.32207	82.333		16.3211	79.6578
1.32284	122.821		9.32447	116.17		2.3227	74.5849		10.323	68.3161		3.32237	92.7234		11.3227	77.8088		4.32237	96.7674		12.3236	68.3489		5.32249	74.5849		13.3231	83.4364		6.32408	75.8673		14.3235	65.7871		7.32312	74.3911		15.324	86.5291		8.32346	85.2944		16.3228	71.0061
1.32374	117.978		9.32579	111.139		2.32381	87.5938		10.3248	64.8446		3.32417	91.8734		11.3238	66.0197		4.32417	87.0212		12.3248	79.8875		5.32332	69.5388		13.3247	85.6195		6.32575	79.8517		14.3245	69.4672		7.32409	73.043		15.325	80.4631		8.32429	94.7484		16.3237	70.857
1.32499	101.822		9.32669	124.974		2.32554	88.7748		10.3263	76.3952		3.32563	88.9836		11.3247	72.7657		4.32528	86.9765		12.3257	79.9024		5.32492	69.1392		13.3257	71.0151		6.32679	75.1008		14.3257	81.5278		7.32527	76.756		15.3258	86.0758		8.3254	95.5745		16.3246	75.25
1.32673	105.661		9.32801	130.116		2.32721	73.4725		10.3272	62.4618		3.32646	98.2288		11.3261	64.7432		4.32605	88.2082		12.3272	71.358		5.32658	64.4569		13.3267	65.6618		6.32783	73.1087		14.3275	80.7732		7.327	75.1843		15.3273	90.8535		8.32714	92.8397		16.3262	74.7489
1.32833	108.926		9.32975	118.568		2.32811	87.9606		10.3284	71.8829		3.32758	90.9817		11.3278	62.6228		4.3275	94.3368		12.329	76.431		5.32769	81.2504		13.3285	65.1101		6.3295	80.6092		14.329	76.3475		7.3286	65.1459		15.329	89.5592		8.3286	84.5578		16.3278	76.9558
1.3293	104.468		9.33127	104.173		2.32908	83.338		10.3302	76.9618		3.32924	86.6484		11.329	64.8417		4.32924	106.737		12.3302	70.4782		5.32867	76.8187		13.3301	72.2199		6.33116	74.3404		14.3298	62.089		7.32964	60.3085		15.3301	94.7305		8.32957	74.0362		16.3289	67.9761
1.33041	112.082		9.33225	105.073		2.33068	68.7485		10.3317	80.2603		3.33077	79.3864		11.3299	74.3821		4.33049	101.984		12.331	68.5189		5.33012	77.4032		13.331	70.7675		6.33214	75.7898		14.3309	57.1383		7.33068	66.6042		15.3311	95.2226		8.33068	70.7526		16.3298	72.4615
1.33215	100.069		9.33336	108.962		2.33235	75.3096		10.3326	80.2066		3.33174	78.9779		11.3313	69.7386		4.33146	85.5777		12.3324	65.3129		5.33186	80.144		13.332	67.5198		6.33297	70.8868		14.3326	72.1871		7.33228	64.955		15.3326	94.7156		8.33242	79.625		16.3314	84.5995
1.33381	103.176		9.33509	112.44		2.33339	79.2165		10.3336	83.1233		3.33285	91.0801		11.3331	72.5569		4.33278	89.923		12.3341	74.233		5.33318	81.5934		13.3336	90.5224		6.3345	77.2451		14.3341	78.5603		7.33402	69.0855		15.3343	86.5291		8.33408	77.7641		16.3332	76.9887
1.33486	111.491		9.33669	111.924		2.33436	80.5018		10.3353	75.9955		3.33445	89.2967		11.3345	65.1995		4.33452	92.5653		12.3354	79.8129		5.33408	67.1112		13.3352	81.313		6.33616	68.1669		14.3351	71.3938		7.33513	67.1887		15.3357	76.4608		8.33512	84.0985		16.3344	74.8772
1.3359	118.383		9.33773	106.827		2.33589	74.0511		10.3368	77.0244		3.33619	89.756		11.3355	71.5429		4.33598	95.8548		12.3364	77.6806		5.3354	78.6826		13.3363	76.1089		6.33734	64.8029		14.3362	64.9073		7.3361	69.9921		15.3366	76.2192		8.33617	80.5317		16.3353	76.9201
1.33756	112.63		9.33877	102.24		2.3377	68.3697		10.3379	73.1981		3.3373	95.9025		11.3367	74.1405		4.33695	87.8533		12.3377	79.3059		5.33721	81.1311		13.3373	84.5816		6.33832	62.4349		14.3379	73.1683		7.3377	76.8008		15.3379	97.8261		8.33769	70.4425		16.3367	72.8134
1.33923	105.783		9.34051	95.9473		2.33901	78.614		10.3389	74.236		3.33827	94.9989		11.3385	65.3397		4.33813	83.4871		12.3394	72.536		5.33867	69.4881		13.3388	76.7769		6.33977	61.4806		14.3396	73.9228		7.3395	76.4638		15.3397	89.3295		8.33943	78.1697		16.3385	84.2864
1.3402	107.376		9.34218	99.9376		2.33992	79.9233		10.3405	76.8873		3.33973	79.0614		11.34	66.7682		4.33987	90.7968		12.3409	65.3994		5.33964	60.8453		13.3406	68.5934		6.34151	78.0325		14.3407	65.9332		7.34055	72.1006		15.3412	78.1458		8.34061	89.2072		16.3399	70.356
1.34111	102.947		9.34315	86.4068		2.34131	75.8405		10.3422	76.3952		3.34153	73.5292		11.3409	60.9945		4.34146	88.8822		12.3419	69.5806		5.34089	73.7111		13.3419	64.9043		6.3429	84.2208		14.3416	64.1378		7.34131	79.9083		15.3421	82.9145		8.34151	69.3688		16.3408	66.6489
1.3427	104.211		9.34405	85.4406		2.34311	82.4582		10.3434	77.4569		3.34271	93.129		11.3422	65.1757		4.34243	93.4869		12.3431	73.1623		5.34269	67.3528		13.3428	69.4016		6.3438	69.2764		14.3432	61.8832		7.34277	78.2919		15.3433	86.3353		8.34311	80.4482		16.3421	80.7941
1.3443	106.743		9.34558	87.3045		2.34443	89.4011		10.3444	74.8831		3.34362	86.04		11.344	55.7158		4.34355	85.9207		12.3448	83.8898		5.34415	68.9841		13.3442	76.8097		6.34512	64.949		14.3449	53.816		7.3445	70.4872		15.3451	81.3846		8.34492	87.1345		16.3439	76.2461
1.34548	109.705		9.34725	88.4885		2.34533	69.9444		10.3458	66.7563		3.34514	79.3864		11.3454	57.4008		4.34528	89.8156		12.3464	80.0724		5.34492	76.6755		13.346	67.8329		6.34686	74.2151		14.3461	68.5755		7.34569	78.9838		15.3466	87.3582		8.34603	85.2288		16.3453	74.5998
1.34645	100.525		9.34836	91.5752		2.34665	73.6962		10.3476	66.4223		3.34695	82.3032		11.3463	70.3291		4.34688	99.0698		12.3474	71.1672		5.34603	75.7152		13.3473	69.4016		6.34839	71.6115		14.3471	70.6214		7.34666	81.1788		15.3474	94.5695		8.34679	78.4828		16.3461	73.1415
1.34791	107.677		9.34933	104.164		2.34853	77.3227		10.3489	72.3661		3.3482	98.3063		11.3473	73.6604		4.34778	77.4897		12.3485	80.6539		5.34769	75.5691		13.3482	67.4751		6.34929	76.6308		14.3486	74.3761		7.34805	80.9402		15.3485	92.5176		8.34818	94.8736		16.3473	68.4711
1.34972	110.54		9.35086	106.567		2.34985	87.5789		10.3498	77.7313		3.34896	86.8363		11.349	78.2412		4.34875	78.0176		12.3502	72.1364		5.34922	81.4383		13.3495	74.2598		6.35054	75.0114		14.3504	78.116		7.34978	69.8192		15.3501	87.8264		8.34992	86.0639		16.3489	71.0479
1.35104	110.45		9.35259	107.298		2.35061	81.8469		10.3513	78.9331		3.35028	82.3389		11.3506	87.1614		4.35035	92.452		12.3518	71.8591		5.35019	77.8714		13.3514	78.3695		6.35234	66.6102		14.3516	69.9653		7.35117	78.0742		15.3517	86.6693		8.35117	79.4699		16.3504	63.5891
1.35187	116.674		9.35391	106.582		2.35186	79.0286		10.3531	75.3156		3.35202	95.3836		11.3516	71.707		4.35195	86.386		12.3528	70.0667		5.35131	71.9843		13.3527	69.3271		6.3538	59.0619		14.3523	66.1091		7.35214	72.888		15.3527	85.2258		8.35214	79.7771		16.3514	58.4446
1.35326	99.7796		9.35482	92.3834		2.35353	80.9462		10.3543	73.1653		3.35334	97.7307		11.3526	77.8505		4.35306	82.67		12.3537	63.8873		5.3529	74.0719		13.3535	62.2232		6.35464	69.2197		14.3537	71.4743		7.35332	77.4778		15.3537	85.5718		8.35346	88.0978		16.3525	64.4629
1.35506	104.372		9.35614	88.6018		2.35499	79.5624		10.3551	80.2752		3.35431	88.5213		11.3542	79.3089		4.3541	90.2898		12.3552	64.6985		5.35464	69.506		13.3547	70.6482		6.35568	69.3808		14.3555	63.9171		7.35513	74.9219		15.3553	88.3006		8.35519	76.9439		16.3542	61.3613
1.35652	111.315		9.35794	97.5876		2.35596	71.2984		10.3564	80.2603		3.35556	84.5548		11.356	73.7916		4.35563	103.752		12.3569	94.1519		5.35575	77.2392		13.3564	77.9609		6.35734	79.5147		14.3568	60.4427		7.35666	63.8217		15.3571	93.6479		8.35665	86.7259		16.3559	66.1181
1.35736	112.738		9.35933	86.374		2.35707	64.0066		10.3581	68.6083		3.3573	86.4486		11.3572	71.4028		4.35737	111.342		12.358	78.8526		5.35672	77.3227		13.3578	79.9561		6.35887	78.2621		14.3577	67.2484		7.35756	73.9646		15.3582	92.3536		8.35763	81.3906		16.3569	75.9747
1.35868	124.551		9.36023	77.6478		2.35881	69.1929		10.3595	62.4469		3.35883	94.3995		11.3581	64.8715		4.35861	99.9913		12.359	70.9166		5.35825	73.8572		13.3589	77.3257		6.35991	65.0206		14.359	65.9153		7.35874	67.3975		15.3592	82.9712		8.3588	93.8597		16.3579	83.2396
1.36055	120.304		9.36155	87.3731		2.36047	66.5833		10.3604	69.2883		3.3598	92.8367		11.3596	66.0942		4.35952	93.4421		12.3605	69.7327		5.35999	71.6682		13.36	69.8609		6.36096	67.5257		14.3607	64.7969		7.36055	66.807		15.3607	71.8859		8.36054	86.8601		16.3595	88.2439
1.36194	117.957		9.36336	97.8083		2.36151	74.1972		10.3616	68.5904		3.36098	87.722		11.3614	66.9502		4.36098	85.0708		12.3623	72.9834		5.36117	80.5973		13.3617	76.6367		6.36255	77.6358		14.3623	73.5411		7.36207	68.999		15.3625	87.2896		8.36207	82.4284		16.3612	78.614
1.3627	115.517		9.36475	98.2944		2.36249	68.4741		10.3633	73.4099		3.36271	82.0049		11.3627	65.8676		4.36271	96.6183		12.3636	68.9125		5.36214	72.0231		13.3633	69.3867		6.36429	85.8133		14.3632	69.2137		7.36291	70.2069		15.3637	89.8097		8.36304	87.8204		16.3624	78.0772
1.36381	115.589		9.36558	98.7626		2.36415	79.6489		10.3649	67.4333		3.36431	92.8069		11.3636	71.1433		4.36403	88.3274		12.3645	71.9187		5.36367	72.8402		13.3644	74.3075		6.36547	69.4941		14.3643	66.8338		7.36388	66.473		15.3646	88.7658		8.36415	84.7964		16.3633	76.3683
1.36555	121.744		9.36669	96.8479		2.36589	81.0804		10.3659	82.843		3.36535	89.3623		11.3649	71.6175		4.36493	91.2233		12.3658	67.9761		5.36547	75.241		13.3654	63.2431		6.36637	74.1405		14.3661	67.1709		7.36555	78.5454		15.3661	88.7032		8.36589	92.4341		16.3649	66.2016
1.36701	123.006		9.36836	100.081		2.367	80.8567		10.367	72.4794		3.36639	71.3222		11.3668	63.777		4.36632	86.3054		12.3677	70.7317		5.36665	66.9203		13.367	60.2787		6.3679	80.6897		14.3677	65.3546		7.36707	76.255		15.3679	76.6218		8.36756	93.4183		16.3666	66.7414
1.36805	114.354		9.36982	102.502		2.36797	82.8698		10.3687	64.8864		3.36813	68.4413		11.3681	68.0834		4.3682	87.8204		12.369	77.3734		5.36742	64.8953		13.3687	72.9774		6.36971	73.1116		14.3687	68.6889		7.36818	79.3715		15.3692	83.514		8.36846	85.9565		16.3678	73.2757
1.36916	108.297		9.37086	97.346		2.36957	77.2929		10.3704	75.3752		3.3698	80.4511		11.3688	72.8313		4.36952	82.2047		12.3699	83.6691		5.3688	68.1282		13.3699	76.8574		6.37089	68.9215		14.3698	76.592		7.36923	74.8742		15.3699	95.4463		8.36943	73.1623		16.3686	75.5422
1.37076	109.418		9.37197	108.154		2.37138	74.5014		10.3714	77.5493		3.37077	84.2566		11.3702	69.1899		4.37028	93.3616		12.3713	84.4564		5.37047	80.2155		13.3708	65.8318		6.37179	64.8417		14.3715	65.8109		7.37075	63.0523		15.3712	96.3916		8.37103	70.186		16.37	79.1986
1.37242	104.408		9.37364	103.284		2.37242	66.479		10.3724	79.9889		3.37167	76.8067		11.3718	81.4979		4.37153	92.9053		12.3731	80.7195		5.37179	74.6326		13.3724	58.1374		6.37332	65.7423		14.3732	57.4932		7.37249	65.0832		15.373	100.039		8.37255	82.324		16.3717	80.9671
1.37354	135.18		9.3753	95.7027		2.37318	65.6379		10.3741	74.1376		3.3732	78.784		11.3731	83.7824		4.3732	98.2496		12.3745	79.0673		5.37276	76.2252		13.3742	71.1701		6.37512	67.2245		14.374	64.6568		7.37374	74.8503		15.3743	92.4431		8.37367	92.2999		16.373	71.6324
1.37458	131.264		9.37634	92.6578		2.37464	82.6461		10.3758	67.7047		3.37487	84.5995		11.3741	65.6707		4.37466	84.5638		12.3753	75.748		5.37408	86.6424		13.3753	66.5833		6.3763	67.7703		14.375	70.1293		7.37464	66.3119		15.3753	94.134		8.37471	76.3594		16.3739	60.3533
1.37611	108.607		9.37739	88.4378		2.37638	76.3087		10.3768	74.0869		3.37605	72.8731		11.3754	76.7381		4.37563	81.155		12.3764	67.0247		5.37582	80.9581		13.3761	55.9156		6.37707	74.8623		14.3766	72.5748		7.3761	70.3381		15.3765	88.6585		8.37624	72.709		16.3753	68.3548
1.37791	110.215		9.37891	84.0627		2.37763	76.5652		10.3776	70.8868		3.37702	95.1898		11.3771	78.9272		4.37681	86.4188		12.3781	67.4363		5.37735	76.8366		13.3776	71.0598		6.37846	58.707		14.3782	76.3832		7.37784	78.79		15.3783	90.5403		8.37797	77.9341		16.377	85.539
1.37909	115.959		9.38065	77.1676		2.3786	73.2906		10.3792	74.4209		3.37848	85.8283		11.3787	76.3445		4.37848	98.9952		12.3796	80.8329		5.37825	79.0972		13.3793	71.4773		6.38012	69.1511		14.3793	68.0775		7.37916	86.5023		15.3798	98.7715		8.37922	73.0371		16.3785	79.6549
1.37999	104.563		9.38183	84.7188		2.37992	79.1151		10.3808	73.3115		3.38028	86.034		11.3797	68.6471		4.38007	98.0647		12.3806	74.9666		5.37943	74.8175		13.3806	65.9242		6.38144	64.0573		14.3802	71.2835		7.38006	72.5122		15.3808	93.3318		8.38013	72.3183		16.3794	71.2954
1.38152	99.9317		9.3828	103.633		2.38172	67.818		10.382	75.5422		3.3816	79.1031		11.3808	81.1043		4.38112	90.9042		12.3817	69.9862		5.38117	71.358		13.3815	65.3457		6.38241	59.2438		14.3818	73.0818		7.38152	75.6287		15.3819	81.0029		8.38151	84.1939		16.3806	69.1929
1.38333	117.226		9.38433	112.222		2.38311	64.3376		10.383	77.0155		3.38251	80.979		11.3824	80.7285		4.38216	100.794		12.3834	70.9972		5.38283	75.2858		13.3829	70.8958		6.38366	61.9071		14.3836	74.3284		7.38332	66.2016		15.3836	85.2706		8.38332	88.0918		16.3824	65.8497
1.38444	117.175		9.38614	109.374		2.38408	69.7476		10.3845	75.241		3.38383	76.2431		11.3842	70.0667		4.38382	94.9184		12.3851	67.7942		5.38374	68.2206		13.3847	69.7058		6.3854	69.843		14.3848	69.1571		7.38457	73.3055		15.3853	84.3699		8.38464	87.8741		16.3839	65.0594
1.38527	108.897		9.38725	100.978		2.38526	80.6032		10.3862	69.8907		3.38563	90.6596		11.3852	74.5968		4.38556	93.4451		12.3861	61.1585		5.38485	71.1851		13.3861	70.6333		6.38693	67.5019		14.3857	67.153		7.38534	67.4751		15.3862	94.8498		8.38554	87.895		16.3849	67.821
1.38666	118.464		9.38808	102.297		2.38707	72.1275		10.3875	72.2289		3.38709	96.5378		11.3862	78.2233		4.3866	93.5555		12.3872	66.0406		5.38665	82.2644		13.3871	65.7423		6.3879	71.5668		14.3871	79.13		7.38659	79.1598		15.3873	88.2439		8.38693	91.5334		16.386	70.5856
1.38833	121.044		9.38947	90.0065		2.3886	74.9517		10.3884	69.5835		3.38799	93.2125		11.3879	76.598		4.38757	95.5089		12.3887	66.6311		5.38825	74.9428		13.3883	67.997		6.38908	64.5494		14.3889	76.0433		7.38832	75.1635		15.389	78.8437		8.38874	78.3933		16.3878	74.1376
1.38965	117.354		9.3912	92.3387		2.3895	77.7342		10.3897	78.0235		3.38924	100.382		11.3896	61.8414		4.38917	99.4754		12.3904	76.2192		5.38915	70.8958		13.39	71.1433		6.39075	67.2722		14.3903	66.4283		7.38971	69.175		15.3908	82.9086		8.39005	89.6337		16.3894	66.8846
1.39055	107.733		9.39246	96.7436		2.39068	75.4528		10.3915	76.4638		3.39105	89.9498		11.3906	61.0541		4.39098	91.0652		12.3916	70.7019		5.39006	81.3727		13.3915	73.8065		6.39241	71.2835		14.3912	65.7125		7.39068	71.7547		15.3917	85.0111		8.39089	81.5874		16.3903	62.6854
1.39187	112.443		9.39343	100.937		2.39249	78.7482		10.393	67.3438		3.39251	78.5931		11.3914	66.9979		4.39209	90.7073		12.3926	76.3922		5.39165	79.0017		13.3925	77.3585		6.39339	62.6735		14.3925	74.6088		7.39193	67.0993		15.3926	86.9496		8.39207	86.1444		16.3912	62.7153
1.39367	113.06		9.39475	95.9354		2.39401	78.3754		10.3939	68.0268		3.39334	89.7351		11.3929	71.0121		4.39285	88.074		12.3942	74.0869		5.39332	73.9914		13.3937	70.7407		6.39443	70.3321		14.3943	69.6223		7.3936	68.0656		15.3941	81.826		8.39374	87.6445		16.3928	75.5661
1.39513	103.29		9.39648	90.9877		2.39485	71.4565		10.3951	61.409		3.39445	91.939		11.3946	85.4167		4.39438	90.0423		12.3959	69.7535		5.39436	83.9494		13.3954	59.0291		6.39616	70.9107		14.3957	72.5808		7.3952	73.6604		15.3958	76.7053		8.39519	81.6262		16.3944	80.0157
1.39611	100.8		9.39794	89.753		2.39589	69.166		10.397	61.5879		3.39612	86.0042		11.3958	82.2853		4.39612	77.7402		12.397	67.9135		5.39533	74.1972		13.397	61.4358		6.39783	71.5936		14.3966	68.6322		7.39624	77.7462		15.3969	72.6613		8.39624	79.5236		16.3955	85.035
1.39729	115.666		9.39891	86.3651		2.39756	68.7306		10.3985	70.5618		3.39764	89.5413		11.3967	66.1956		4.3973	81.9214		12.3979	68.0178		5.39686	74.2628		13.3979	81.0178		6.3988	62.3753		14.3977	72.8045		7.39728	74.4835		15.3979	88.7151		8.39735	81.0715		16.3965	87.2031
1.39902	101.73		9.40009	83.3231		2.39908	72.8581		10.3993	65.3994		3.39862	91.095		11.3982	63.6666		4.39827	91.9003		12.3992	68.8618		5.39867	83.2635		13.3989	81.2504		6.3997	76.2311		14.3995	70.9316		7.39902	68.9334		15.3994	92.4431		8.39908	82.9384		16.398	83.6452
1.40062	111.709		9.40183	87.561		2.4002	78.948		10.4004	70.2039		3.39973	88.8344		11.4	69.008		4.39966	85.9267		12.4009	79.4163		5.39992	76.5085		13.4005	74.3105		6.40123	77.0036		14.4009	76.1238		7.40069	67.3707		15.4011	92.6041		8.40075	89.8633		16.3998	80.4332
1.40159	116.352		9.40343	101.354		2.40124	74.8802		10.4021	64.1885		3.40139	87.4029		11.4013	82.9294		4.40139	91.3605		12.4022	81.0148		5.40089	79.2075		13.4021	82.6998		6.4029	78.0474		14.4019	82.6372		7.40173	66.4461		15.4024	85.8342		8.40179	94.2682		16.4011	82.5417
1.40263	100.415		9.4044	101.265		2.40276	62.5989		10.4035	77.1795		3.40306	86.3651		11.4022	79.3894		4.40278	85.8223		12.4032	78.9421		5.40221	79.6399		13.4032	79.4103		6.40401	74.5849		14.4031	75.5631		7.4027	68.9871		15.4033	82.166		8.40276	82.6312		16.402	74.1763
1.40437	98.8849		9.40551	91.2322		2.4045	80.6122		10.4046	74.2986		3.40417	81.7544		11.4036	63.2819		4.40375	87.5282		12.4045	74.9965		5.40401	72.0082		13.4042	66.7056		6.40498	74.4119		14.4048	63.6189		7.40437	67.0456		15.4047	91.5901		8.40443	75.3991		16.4034	64.3197
1.40604	101.706		9.40725	87.1375		2.40575	78.6289		10.4056	73.7618		3.40515	78.4888		11.4054	67.4751		4.405	93.3139		12.4063	73.2757		5.4054	78.4112		13.4058	72.4734		6.40651	73.3115		14.4064	54.3498		7.4061	78.5454		15.4065	90.1347		8.4061	77.8625		16.4052	64.6448
1.40701	101.59		9.40891	92.4878		2.40665	72.5271		10.4072	82.5358		3.40667	87.7757		11.4067	77.263		4.40674	101.912		12.4077	79.971		5.40631	64.7492		13.4075	74.7131		6.40825	73.5292		14.4075	64.2691		7.40714	79.2791		15.4079	80.2096		8.40721	84.4206		16.4065	71.8203
1.40791	107.092		9.40975	103.141		2.40811	74.7281		10.409	82.8489		3.40848	78.9302		11.4077	81.6828		4.40827	89.6635		12.4087	68.1938		5.40762	67.0038		13.4087	77.949		6.40957	77.1467		14.4084	61.4925		7.40798	67.9671		15.4088	96.4901		8.40818	91.1845		16.4074	72.038
1.40951	121.073		9.41072	97.0657		2.40992	75.0949		10.4101	69.6939		3.40966	76.3713		11.409	70.514		4.40924	91.0801		12.4099	65.2413		5.40943	83.341		13.4097	81.0893		6.41047	67.4393		14.41	75.6138		7.40944	70.2247		15.4101	84.3073		8.40978	92.5087		16.4088	75.1187
1.41111	107.853		9.41232	96.5348		2.41124	67.141		10.411	68.8588		3.41056	80.475		11.4108	82.0944		4.41042	95.1838		12.4116	69.8251		5.41082	77.6269		13.4111	70.9047		6.41179	69.9086		14.4118	77.1974		7.4111	69.7088		15.4119	78.6438		8.41158	80.1857		16.4107	70.6184
1.41222	105.843		9.41398	80.4899		2.41214	80.7404		10.4126	67.1142		3.41209	84.9485		11.4122	73.2757		4.41223	95.5655		12.4132	72.1722		5.41165	71.1582		13.4128	71.0508		6.41359	72.9327		14.413	73.556		7.41228	64.2631		15.4134	89.0134		8.41262	82.7684		16.412	75.071
1.41319	103.827		9.41502	82.1988		2.41353	93.0604		10.4144	68.832		3.4139	82.2793		11.4131	61.3195		4.41382	96.9374		12.4142	76.9887		5.41283	64.3645		13.4142	77.8386		6.41498	65.6528		14.4139	67.3319		7.41325	69.6134		15.4142	91.9987		8.41346	99.699		16.4128	68.7962
1.41472	110.471		9.41607	88.6048		2.4154	72.5271		10.4156	58.6861		3.41501	83.3768		11.4142	60.5262		4.41466	88.9179		12.4153	79.6161		5.41457	72.5718		13.4151	70.693		6.41596	67.7792		14.4155	72.1961		7.41471	78.441		15.4153	94.5098		8.41492	101.017		16.4139	70.0577
1.41652	107.235		9.41759	96.4185		2.41665	79.4968		10.4165	69.6164		3.41584	77.9042		11.4158	70.2725		4.4157	92.6399		12.417	71.7934		5.41603	76.6815		13.4165	76.085		6.41721	68.4562		14.4173	66.8189		7.41645	75.0979		15.4169	83.0994		8.41665	86.6037		16.4157	67.3796
1.41777	101.992		9.41933	98.8342		2.41742	80.1499		10.4181	69.846		3.41723	90.1854		11.4173	70.0965		4.41737	107.921		12.4186	74.4149		5.41693	73.6753		13.4183	68.8618		6.41908	69.4523		14.4184	64.9401		7.41784	68.3757		15.4185	81.6858		8.41783	96.8211		16.4171	70.359
1.41867	105.858		9.42058	105.228		2.41867	73.9079		10.4199	72.8313		3.41896	86.9317		11.4183	71.0598		4.41889	104.838		12.4195	80.3855		5.41811	71.525		13.4196	70.0786		6.42047	68.5069		14.4192	61.239		7.41874	67.5735		15.4194	74.3612		8.41881	90.8773		16.418	84.7576
1.42006	107.54		9.42148	98.6314		2.4204	79.9024		10.421	74.2897		3.42021	101.396		11.4195	75.6317		4.41993	93.8239		12.4205	79.0972		5.41978	65.0117		13.4203	64.0841		6.42123	80.3945		14.4207	75.8077		7.42006	76.3743		15.4206	73.9109		8.42019	81.4293		16.4192	84.4355
1.42187	106.806		9.42287	96.3618		2.42179	80.1708		10.4218	76.422		3.42119	92.5117		11.4211	77.1079		4.42098	88.8374		12.4221	68.6889		5.42144	60.6813		13.4216	64.6627		6.42241	77.0304		14.4224	74.6595		7.4218	83.1233		15.4222	86.3889		8.42193	75.6854		16.4209	66.8607
1.42319	100.716		9.42468	96.1829		2.42276	69.5		10.4232	77.3674		3.42251	88.7658		11.4228	63.6636		4.42257	88.8374		12.4238	65.8258		5.42249	74.7489		13.4233	60.1803		6.42408	68.3519		14.4237	79.804		7.42325	77.7462		15.4239	70.0816		8.42332	77.4748		16.4225	58.543
1.42409	97.5816		9.426	89.1029		2.42395	76.3832		10.4249	75.6526		3.42431	101.235		11.4239	66.0376		4.42431	93.4063		12.4248	78.3068		5.42346	74.2032		13.4248	66.9233		6.42554	70.4246		14.4246	76.771		7.42423	70.5021		15.425	71.8561		8.42429	82.7923		16.4236	63.5056
1.42548	117.936		9.42683	97.7456		2.42561	71.4475		10.4262	74.6088		3.42577	100.549		11.4249	67.8806		4.42549	87.8145		12.4258	77.6209		5.42512	72.1662		13.4258	66.5237		6.42658	57.7885		14.4259	75.2679		7.42541	69.4136		15.426	84.3759		8.42547	88.742		16.4246	62.1874
1.42729	100.74		9.42822	98.5777		2.42728	71.6443		10.4272	66.5297		3.42674	76.6308		11.4264	63.8336		4.42646	88.2022		12.4274	72.709		5.42686	80.0127		13.4269	69.9862		6.42769	50.3148		14.4277	72.5271		7.42721	67.8419		15.4275	87.3731		8.42721	92.2194		16.4262	54.4155
1.42867	111.253		9.43009	85.035		2.42832	75.7063		10.4284	72.1931		3.42792	66.6191		11.4281	68.1013		4.42792	78.948		12.4291	72.3541		5.42797	81.0178		13.4287	73.55		6.42929	66.8189		14.4291	65.5634		7.42874	66.6012		15.4293	100.829		8.42874	94.3458		16.428	60.6455
1.42944	103.469		9.43141	80.7017		2.42936	76.5085		10.4301	63.6935		3.42966	83.0249		11.4294	69.7625		4.42973	83.6959		12.4304	75.3335		5.42887	74.4596		13.4303	68.3996		6.43102	77.1497		14.4301	66.1062		7.42957	66.8547		15.4305	89.6695		8.42971	88.2469		16.4291	65.4679
1.43062	97.7933		9.43225	83.2396		2.43103	76.929		10.4317	64.0871		3.43126	84.9515		11.4303	71.4833		4.43098	83.1203		12.4313	65.0564		5.43047	76.7471		13.4313	70.4633		6.43214	63.1954		14.4313	64.8953		7.43062	61.7281		15.4314	88.575		8.43089	85.9237		16.43	64.281
1.43236	106.74		9.43343	86.7826		2.4327	79.1031		10.4326	67.4422		3.43223	87.4626		11.4318	71.4415		4.43188	80.6062		12.4327	63.3296		5.43228	77.1557		13.4324	79.2105		6.43311	58.1463		14.433	72.4466		7.43228	62.5095		15.4329	90.6745		8.43269	90.7998		16.4316	74.1376
1.43381	107.659		9.43509	84.1134		2.43381	79.7831		10.4338	65.2204		3.43334	79.118		11.4336	62.5512		4.43334	76.7202		12.4345	66.8696		5.43339	74.1733		13.434	62.763		6.43464	69.005		14.4346	80.2603		7.43381	65.2234		15.4347	78.5991		8.43422	88.6257		16.4334	62.4826
1.43479	112.809		9.43655	94.468		2.43478	73.1862		10.4355	75.6585		3.43508	76.252		11.4348	67.2066		4.43514	87.4149		12.4358	64.0841		5.43422	75.7182		13.4357	71.9366		6.43637	66.5923		14.4355	73.6842		7.43485	60.9646		15.4359	86.4874		8.43505	90.9519		16.4345	64.3734
1.4359	104.208		9.43752	95.2494		2.43644	75.2291		10.4371	85.2557		3.43674	75.6764		11.4356	72.381		4.43639	88.9358		12.4367	65.9988		5.43561	80.7702		13.4368	86.1742		6.43755	65.1846		14.4367	62.4498		7.43589	64.3048		15.4367	85.6493		8.4361	79.1479		16.4353	71.1314
1.43756	103.985		9.43871	97.8112		2.43818	78.8138		10.4381	78.5037		3.43764	78.8437		11.437	68.4264		4.43723	93.1648		12.4381	64.955		5.43735	77.9311		13.4378	80.9373		6.43852	73.6932		14.4384	72.9297		7.43749	74.2926		15.4381	88.0292		8.43776	84.0359		16.4368	81.7663
1.43923	116.639		9.44037	89.7381		2.43922	76.601		10.4392	83.1203		3.43855	81.2951		11.4386	65.0504		4.43848	95.0377		12.4399	66.8607		5.4386	78.6975		13.4394	76.3057		6.44005	76.3653		14.44	71.5877		7.43923	71.4863		15.4398	78.7452		8.43929	93.9849		16.4384	86.4038
1.44027	110.367		9.44204	99.6513		2.44006	79.8219		10.4409	80.8985		3.44015	78.4768		11.4399	70.0756		4.44021	91.0622		12.4413	74.23		5.43957	76.0999		13.4412	71.364		6.44186	71.3044		14.4409	66.2583		7.44041	80.0426		15.4411	76.091		8.44033	91.8585		16.4396	80.5883
1.44131	109.696		9.44308	94.4442		2.44151	75.7003		10.4426	69.8579		3.44181	74.7877		11.4409	73.8513		4.44153	92.783		12.4421	67.9582		5.44089	76.3892		13.4422	70.0548		6.44304	66.3239		14.4419	69.6164		7.44138	70.9703		15.4421	83.1054		8.44137	96.4095		16.4406	67.654
1.44291	106.192		9.44405	85.1602		2.44325	71.0449		10.4435	79.804		3.44292	75.3991		11.4422	76.8604		4.4425	96.7704		12.4433	69.4851		5.44262	78.1846		13.4431	79.6877		6.4438	76.2878		14.4435	60.9259		7.44284	78.5693		15.4433	91.5812		8.44297	86.2488		16.442	66.8547
1.44465	128.341		9.44572	90.931		2.44443	77.4121		10.4445	65.5604		3.44389	85.4644		11.4439	63.5742		4.44375	87.9755		12.4449	75.6466		5.44408	72.3541		13.4445	68.1222		6.44519	79.4908		14.4451	67.7882		7.44457	77.0781		15.4451	85.9326		8.44471	90.9608		16.4438	73.2309
1.44576	113.564		9.44745	80.9492		2.44533	71.5877		10.446	74.8414		3.44542	85.5539		11.4454	63.8873		4.44549	97.4593		12.4464	64.7462		5.44506	67.9791		13.4462	76.4757		6.44686	74.0541		14.4462	76.8873		7.44582	77.0722		15.4466	96.0517		8.44589	96.5795		16.4452	74.9249
1.44673	99.0221		9.44857	82.3151		2.44679	69.6104		10.4476	80.4034		3.44723	91.1726		11.4464	59.6405		4.44709	95.9175		12.4474	65.0087		5.44624	76.7471		13.4474	78.0533		6.44818	73.4993		14.4472	80.3468		7.44673	75.0263		15.4476	84.7218		8.44686	97.0507		16.4462	74.7967
1.44833	110.775		9.44954	87.0689		2.4486	67.2305		10.4488	88.4945		3.44848	94.137		11.4475	66.4879		4.44806	97.7307		12.4486	80.6271		5.44804	75.6973		13.4484	73.7946		6.44915	81.5218		14.4487	73.4964		7.44825	72.4168		15.4487	75.4677		8.44832	85.2318		16.4473	70.5379
1.45013	101.975		9.45113	86.9347		2.44999	63.6636		10.4497	76.5562		3.44938	97.5876		11.4492	77.779		4.4491	96.2157		12.4502	65.116		5.44957	79.622		13.4498	74.063		6.45047	74.5133		14.4505	80.8209		7.45006	66.2374		15.4504	70.01		8.45006	88.6495		16.4491	75.0412
1.45117	114.166		9.45287	84.8441		2.45089	70.9107		10.4512	62.3723		3.45077	94.1967		11.4509	75.238		4.45077	98.7208		12.4519	61.6267		5.45054	93.0336		13.4517	73.4755		6.45221	61.6476		14.4518	73.7797		7.45124	63.9827		15.452	77.7909		8.45138	92.1001		16.4507	72.2736
1.45201	116.639		9.45391	77.9042		2.45214	73.9706		10.453	74.403		3.45258	87.1435		11.4519	81.7395		4.45243	101.307		12.4529	59.6763		5.45165	91.8496		13.4531	77.4867		6.45366	64.2452		14.4527	68.4383		7.45207	68.5218		15.4531	71.9068		8.45228	89.8514		16.4516	72.7359
1.45347	106.612		9.45475	85.023		2.45395	82.7952		10.4542	77.0483		3.45389	88.1276		11.4529	86.2816		4.45348	84.9664		12.454	67.0038		5.45339	73.1564		13.4539	85.8193		6.45464	74.4567		14.4541	65.4292		7.45332	66.3328		15.4541	76.7799		8.45374	90.6387		16.4528	83.2724
1.45513	104.575		9.4562	89.0999		2.4554	75.9657		10.4552	69.8221		3.4548	89.3892		11.4547	71.8024		4.45452	85.029		12.4556	77.3615		5.45499	71.2984		13.4551	84.1283		6.45582	71.5489		14.4559	66.8846		7.45506	67.0993		15.4558	89.1565		8.45554	93.5704		16.4546	71.874
1.45631	118.771		9.45794	79.6489		2.45631	77.2541		10.4565	71.3789		3.45619	77.3406		11.4563	69.8699		4.45618	92.4729		12.4574	66.1956		5.45589	76.4489		13.4569	67.1202		6.45755	60.5859		14.4572	73.8691		7.45638	76.6308		15.4575	79.7115		8.45679	88.7032		16.4562	67.2872
1.45729	125.264		9.45912	82.7416		2.45756	65.7423		10.4583	72.8492		3.45799	81.2534		11.4573	67.8538		4.45792	102.192		12.4585	69.0348		5.45686	83.0159		13.4585	68.7574		6.45915	77.5255		14.458	70.4693		7.45735	75.2887		15.4584	80.2752		8.45762	95.6252		16.457	60.8543
1.45867	112.842		9.46009	81.0536		2.45936	69.2644		10.4597	74.3702		3.45931	91.2143		11.4582	71.5817		4.45889	90.3763		12.4595	73.5441		5.45853	63.3117		13.4594	74.7459		6.46012	73.6485		14.4594	63.9559		7.4586	85.3332		15.4593	84.9634		8.45887	90.1914		16.458	79.291
1.46041	111.739		9.46148	82.3539		2.46089	62.3723		10.4606	78.1846		3.46014	93.7254		11.4598	71.7636		4.45973	96.9344		12.4611	77.6925		5.46005	70.4425		13.4606	68.1282		6.46123	61.1585		14.4613	84.853		7.46034	78.3456		15.4609	96.7346		8.46054	96.6571		16.4596	83.001
1.46187	101.652		9.46322	88.059		2.46172	74.2002		10.462	74.5044		3.46133	104.047		11.4614	71.2238		4.46125	85.6911		12.4628	63.5652		5.46117	68.0954		13.4624	65.0206		6.46297	63.2909		14.4626	80.1559		7.46187	79.5654		15.4626	84.9783		8.46193	101.703		16.4612	57.1532
1.46277	98.1751		9.46461	80.3348		2.46276	70.5289		10.4638	64.6746		3.46299	94.6738		11.4625	66.8309		4.46292	79.9769		12.4638	69.9742		5.46221	78.9868		13.4639	68.4682		6.46464	78.5365		14.4634	76.8664		7.46284	79.4371		15.4637	81.1251		8.4629	100.486		16.4622	61.5522
1.46395	103.886		9.46558	93.3556		2.46443	58.3641		10.4652	64.1199		3.46445	79.9233		11.4635	62.8674		4.4641	89.9319		12.4647	72.1931		5.46374	72.5659		13.4647	79.9471		6.46547	71.6503		14.4646	77.9698		7.46395	73.4904		15.4647	75.1933		8.46415	110.179		16.4632	67.1649
1.46576	99.9078		9.46676	88.8285		2.46596	61.069		10.466	75.244		3.46549	80.4601		11.465	70.5707		4.46507	86.2935		12.4661	67.8896		5.46547	80.8955		13.4658	76.6815		6.46644	66.4819		14.4664	77.7909		7.46568	74.1018		15.4662	75.6287		8.46582	97.4325		16.4648	70.5289
1.46729	104.441		9.4685	83.8182		2.467	69.1929		10.4671	83.3917		3.4666	90.758		11.4667	71.3342		4.46653	93.2662		12.4678	77.3883		5.46672	82.6342		13.4674	59.0917		6.46804	68.2206		14.4678	75.575		7.46735	77.5553		15.468	79.971		8.46742	95.6759		16.4665	75.5989
1.46826	109.66		9.47002	82.491		2.46804	76.9618		10.4688	80.0217		3.46834	97.4325		11.4681	69.8311		4.46827	91.5036		12.469	78.7959		5.46762	69.0408		13.469	68.8887		6.46957	70.4544		14.4687	75.7987		7.46832	75.8971		15.4692	74.8324		8.46846	99.0966		16.4678	76.6367
1.46944	105.527		9.471	75.3364		2.46964	78.0026		10.4703	80.3527		3.47001	83.9226		11.4689	75.0084		4.46966	88.0918		12.47	76.2789		5.46908	76.1626		13.47	68.9573		6.47068	71.9873		14.4699	81.0715		7.46937	86.1593		15.4701	83.1322		8.4695	80.2513		16.4687	67.5347
1.47117	104.784		9.47218	79.3626		2.47138	77.8386		10.4713	75.2112		3.47105	86.4933		11.4703	70.9405		4.47056	95.9234		12.4713	82.4344		5.47082	80.1022		13.471	67.812		6.47172	63.5801		14.4716	72.9655		7.4711	79.0435		15.4715	93.4809		8.47117	100.856		16.4701	74.2151
1.47277	106.594		9.47391	75.2142		2.47256	69.9653		10.4724	81.3935		3.47202	83.0189		11.4721	74.057		4.47188	104.363		12.4731	74.4507		5.47214	88.7151		13.4726	74.2926		6.47325	59.5391		14.4732	63.1179		7.47277	80.7881		15.4733	90.0989		8.47283	106.102		16.4719	75.9717
1.47367	109.55		9.47551	73.6485		2.47353	71.9933		10.4741	95.1271		3.47362	93.472		11.4736	71.7099		4.47368	87.1435		12.4746	65.8646		5.47304	82.7654		13.4744	80.132		6.47498	74.3553		14.4743	65.2085		7.47374	78.7721		15.4746	95.4284		8.47388	108.384		16.4732	72.3541
1.47465	107.062		9.47634	85.1274		2.47499	69.3867		10.4758	76.6606		3.47535	91.0473		11.4744	70.1651		4.47514	87.558		12.4755	78.7333		5.47443	77.1497		13.4756	72.6166		6.47623	68.2147		14.4753	73.6127		7.47457	75.6615		15.4756	96.0606		8.47485	110.734		16.4741	72.4645
1.47624	100.823		9.47739	86.7826		2.47679	72.6941		10.4768	71.6771		3.47653	92.5743		11.4757	65.0057		4.47605	92.2432		12.4767	79.4968		5.47631	73.3413		13.4765	67.812		6.47721	70.3053		14.477	68.3548		7.4761	66.1897		15.4769	90.3703		8.47651	106.186		16.4755	76.6815
1.47784	98.363		9.47898	90.0781		2.47804	75.7212		10.4779	70.8302		3.47744	85.7298		11.4776	68.6739		4.4773	84.7009		12.4785	65.2622		5.47762	77.1348		13.478	65.7513		6.47859	65.9063		14.4787	75.1993		7.47777	61.236		15.4787	90.7431		8.47825	116.686		16.4774	75.5243
1.47895	111.721		9.48058	89.8395		2.47895	80.9313		10.4794	71.4684		3.47903	90.5851		11.479	70.4126		4.47917	87.9189		12.48	56.005		5.47839	76.8127		13.4798	71.4624		6.48033	64.3406		14.4798	70.8421		7.47895	58.549		15.4801	81.0237		8.47922	109.749		16.4787	69.5329
1.47999	105.374		9.48162	85.9326		2.4804	76.8246		10.4811	58.8442		3.48084	71.7099		11.4798	67.2961		4.48063	92.9888		12.481	65.5992		5.47964	69.6581		13.481	76.592		6.48172	73.7021		14.4807	69.5776		7.47992	71.3163		15.4809	71.3401		8.48006	107.534		16.4794	67.2782
1.48152	99.8094		9.48266	76.079		2.48228	78.9391		10.4823	64.4689		3.48188	80.7702		11.4809	70.3202		4.48146	98.5061		12.4822	64.9311		5.4813	75.42		13.4819	65.0117		6.48262	69.682		14.4824	79.2135		7.48138	81.4234		15.4821	79.0435		8.48158	107.462		16.4807	65.2681
1.48326	99.2726		9.48426	81.7455		2.48353	85.6523		10.4832	76.7352		3.48271	82.5388		11.4826	72.1483		4.48257	97.4981		12.4839	67.5079		5.48276	83.3529		13.4834	68.1461		6.48401	62.6288		14.4842	78.116		7.48312	77.5374		15.4838	88.6853		8.48325	109.854		16.4824	72.2318
1.48451	114.867		9.48593	79.0554		2.48429	86.3054		10.4848	73.1922		3.48417	88.6406		11.484	67.0188		4.48424	89.6546		12.4855	72.1543		5.48374	79.0673		13.4852	71.5578		6.48582	74.4954		14.4853	74.409		7.48443	78.8675		15.4853	86.887		8.48443	107.704		16.4838	65.5485
1.48541	124.348		9.48718	79.6936		2.48554	67.7345		10.4865	68.7724		3.48584	91.6945		11.4851	65.1876		4.48577	89.6397		12.4864	72.7418		5.48492	90.1556		13.4865	79.6071		6.48714	68.2862		14.4861	60.7469		7.48541	75.2589		15.4862	83.517		8.4854	99.037		16.4848	79.5385
1.4868	106.952		9.48808	95.9085		2.48728	68.4741		10.4876	74.7191		3.48709	82.0139		11.4862	65.3516		4.48681	97.9305		12.4874	66.4372		5.48658	88.2439		13.4873	75.0352		6.48797	67.9015		14.4875	67.9045		7.48673	69.4613		15.4874	81.6709		8.48679	95.0735		16.4859	68.1043
1.48861	103.144		9.48954	89.2967		2.4886	68.9513		10.4885	68.1073		3.48806	74.3254		11.4879	62.9419		4.48792	89.3295		12.489	68.328		5.48818	78.4291		13.4885	66.8249		6.48915	72.7806		14.4893	67.6838		7.48846	82.1391		15.489	67.6242		8.4886	93.7463		16.4877	55.1402
1.48992	104.763		9.49127	85.7179		2.4895	71.4833		10.4899	70.4037		3.48938	79.5147		11.4895	67.4512		4.48952	88.4646		12.4906	77.3137		5.48922	80.6092		13.4903	58.5609		6.49082	75.3722		14.4905	61.1376		7.48992	84.2447		15.4907	78.6945		8.48999	100.659		16.4893	61.3792
1.49083	96.6422		9.49259	97.3013		2.49082	70.1919		10.4916	69.3927		3.49119	91.951		11.4906	62.2619		4.49125	93.2692		12.4917	76.0403		5.49033	70.851		13.4916	67.3677		6.49227	79.2642		14.4914	73.3204		7.49082	72.0112		15.4918	84.1731		8.49089	103.728		16.4903	71.2745
1.49222	101.399		9.4935	91.4708		2.49256	82.2167		10.4929	74.7728		3.49264	78.441		11.4916	79.2194		4.49236	99.8333		12.4927	75.0382		5.49193	69.0736		13.4926	67.3558		6.49325	80.4213		14.4928	80.3438		7.49207	76.8366		15.4928	79.807		8.49214	103.036		16.4914	68.7485
1.49409	105.422		9.49489	84.6353		2.49408	71.7636		10.4938	78.8228		3.49355	74.2181		11.4932	78.4142		4.49334	84.6443		12.4942	65.2651		5.49367	82.497		13.4938	72.9238		6.49443	71.8352		14.4946	78.6438		7.49395	66.9621		15.4944	88.3215		8.49394	108.655		16.493	71.197
1.49541	96.7525		9.49676	85.6642		2.49506	71.4594		10.4951	67.5854		3.49473	76.4548		11.4949	75.083		4.49487	87.6982		12.496	74.2658		5.49478	92.8188		13.4956	79.2612		6.49609	77.7462		14.496	65.8467		7.49541	68.6173		15.4961	81.1192		8.4954	109.806		16.4947	79.9352
1.49617	103.91		9.49801	97.2386		2.49617	75.9926		10.4969	56.7059		3.49653	92.6309		11.4961	68.4294		4.49667	89.589		12.4972	81.1251		5.49575	75.5392		13.4972	82.1063		6.49776	68.8469		14.497	64.8417		7.49617	81.3846		15.4972	83.8778		8.49631	111.509		16.4958	77.5255
1.49742	106.737		9.49884	80.9104		2.4979	78.5991		10.4983	67.0993		3.49806	97.3251		11.497	71.5698		4.49785	104.322		12.4981	68.8678		5.49735	70.4663		13.4981	68.0894		6.4988	69.1213		14.4982	70.7109		7.49728	69.0676		15.4981	78.5067		8.49755	116.126		16.4968	71.865
1.49916	107.549					2.49957	66.6639		10.4992	72.8164		3.49903	91.6885		11.4986	73.3204		4.49875	94.1609		12.4996	73.3711		5.49908	64.8267		13.4992	68.2892		6.49984	59.4287		14.5	72.3154		7.49902	69.8311		15.4997	76.2431		8.49936	105.774		16.4984	69.7774
