# Supplementary material for: Binding and sequestration of poison frog alkaloids by a plasma globulin
Source: eLife journal article supplement (doi:10.7554/elife.85096), 2023-12-14
Supplement: fig5-data1 [file BSA+PTX_R3 analysis_CapillaryShapeRawData.xlsx]

## Sheet: RawData
NanoTemper Technologies	NanoTemper Technologies
MO.Affinity Analysis v3.0.5	MO.Affinity Analysis v3.0.5
Origin of exported data	Origin of exported data
Project Title:	20230407_BSA+PTX
Comment:
Project File Path:	C:\Users\nanotemper\Desktop\Aurora_MST\20230407_BSA\BSA+PTX analysis.nta3
Analysis-Set Name:	Analysis-Set #1
Exported from:	Capillary Shape (Raw Data Inspection)
Exported on:	2023-04-07 09:25:20
Sample Information	Sample Information		Sample Information	Sample Information		Sample Information	Sample Information		Sample Information	Sample Information		Sample Information	Sample Information		Sample Information	Sample Information		Sample Information	Sample Information		Sample Information	Sample Information		Sample Information	Sample Information		Sample Information	Sample Information		Sample Information	Sample Information		Sample Information	Sample Information		Sample Information	Sample Information		Sample Information	Sample Information		Sample Information	Sample Information		Sample Information	Sample Information
Merge-Set Name:	BSA+PTX_R3 (#18)		Merge-Set Name:	BSA+PTX_R3 (#18)		Merge-Set Name:	BSA+PTX_R3 (#18)		Merge-Set Name:	BSA+PTX_R3 (#18)		Merge-Set Name:	BSA+PTX_R3 (#18)		Merge-Set Name:	BSA+PTX_R3 (#18)		Merge-Set Name:	BSA+PTX_R3 (#18)		Merge-Set Name:	BSA+PTX_R3 (#18)		Merge-Set Name:	BSA+PTX_R3 (#18)		Merge-Set Name:	BSA+PTX_R3 (#18)		Merge-Set Name:	BSA+PTX_R3 (#18)		Merge-Set Name:	BSA+PTX_R3 (#18)		Merge-Set Name:	BSA+PTX_R3 (#18)		Merge-Set Name:	BSA+PTX_R3 (#18)		Merge-Set Name:	BSA+PTX_R3 (#18)		Merge-Set Name:	BSA+PTX_R3 (#18)
Run Name:	BSA+PTX_R3 (#18)		Run Name:	BSA+PTX_R3 (#18)		Run Name:	BSA+PTX_R3 (#18)		Run Name:	BSA+PTX_R3 (#18)		Run Name:	BSA+PTX_R3 (#18)		Run Name:	BSA+PTX_R3 (#18)		Run Name:	BSA+PTX_R3 (#18)		Run Name:	BSA+PTX_R3 (#18)		Run Name:	BSA+PTX_R3 (#18)		Run Name:	BSA+PTX_R3 (#18)		Run Name:	BSA+PTX_R3 (#18)		Run Name:	BSA+PTX_R3 (#18)		Run Name:	BSA+PTX_R3 (#18)		Run Name:	BSA+PTX_R3 (#18)		Run Name:	BSA+PTX_R3 (#18)		Run Name:	BSA+PTX_R3 (#18)
Date of Measurement:	2023-04-07 09:08:43		Date of Measurement:	2023-04-07 09:09:09		Date of Measurement:	2023-04-07 09:09:36		Date of Measurement:	2023-04-07 09:10:02		Date of Measurement:	2023-04-07 09:10:29		Date of Measurement:	2023-04-07 09:10:56		Date of Measurement:	2023-04-07 09:11:23		Date of Measurement:	2023-04-07 09:11:49		Date of Measurement:	2023-04-07 09:12:16		Date of Measurement:	2023-04-07 09:12:42		Date of Measurement:	2023-04-07 09:13:09		Date of Measurement:	2023-04-07 09:13:36		Date of Measurement:	2023-04-07 09:14:03		Date of Measurement:	2023-04-07 09:14:29		Date of Measurement:	2023-04-07 09:14:56		Date of Measurement:	2023-04-07 09:15:22
Capillary Type:	Monolith Premium Capillary		Capillary Type:	Monolith Premium Capillary		Capillary Type:	Monolith Premium Capillary		Capillary Type:	Monolith Premium Capillary		Capillary Type:	Monolith Premium Capillary		Capillary Type:	Monolith Premium Capillary		Capillary Type:	Monolith Premium Capillary		Capillary Type:	Monolith Premium Capillary		Capillary Type:	Monolith Premium Capillary		Capillary Type:	Monolith Premium Capillary		Capillary Type:	Monolith Premium Capillary		Capillary Type:	Monolith Premium Capillary		Capillary Type:	Monolith Premium Capillary		Capillary Type:	Monolith Premium Capillary		Capillary Type:	Monolith Premium Capillary		Capillary Type:	Monolith Premium Capillary
Capillary Position:	1		Capillary Position:	9		Capillary Position:	2		Capillary Position:	10		Capillary Position:	3		Capillary Position:	11		Capillary Position:	4		Capillary Position:	12		Capillary Position:	5		Capillary Position:	13		Capillary Position:	6		Capillary Position:	14		Capillary Position:	7		Capillary Position:	15		Capillary Position:	8		Capillary Position:	16
Ligand:	PTX		Ligand:	PTX		Ligand:	PTX		Ligand:	PTX		Ligand:	PTX		Ligand:	PTX		Ligand:	PTX		Ligand:	PTX		Ligand:	PTX		Ligand:	PTX		Ligand:	PTX		Ligand:	PTX		Ligand:	PTX		Ligand:	PTX		Ligand:	PTX		Ligand:	PTX
Ligand Concentration:	0.005		Ligand Concentration:	1.95313e-05		Ligand Concentration:	0.0025		Ligand Concentration:	9.76563e-06		Ligand Concentration:	0.00125		Ligand Concentration:	4.88281e-06		Ligand Concentration:	0.000625		Ligand Concentration:	2.44141e-06		Ligand Concentration:	0.0003125		Ligand Concentration:	1.2207e-06		Ligand Concentration:	0.00015625		Ligand Concentration:	6.10352e-07		Ligand Concentration:	7.8125e-05		Ligand Concentration:	3.05176e-07		Ligand Concentration:	3.90625e-05		Ligand Concentration:	1.52588e-07
Target:	BSA		Target:	BSA		Target:	BSA		Target:	BSA		Target:	BSA		Target:	BSA		Target:	BSA		Target:	BSA		Target:	BSA		Target:	BSA		Target:	BSA		Target:	BSA		Target:	BSA		Target:	BSA		Target:	BSA		Target:	BSA
TargetConcentration:	5e-09		TargetConcentration:	5e-09		TargetConcentration:	5e-09		TargetConcentration:	5e-09		TargetConcentration:	5e-09		TargetConcentration:	5e-09		TargetConcentration:	5e-09		TargetConcentration:	5e-09		TargetConcentration:	5e-09		TargetConcentration:	5e-09		TargetConcentration:	5e-09		TargetConcentration:	5e-09		TargetConcentration:	5e-09		TargetConcentration:	5e-09		TargetConcentration:	5e-09		TargetConcentration:	5e-09
Measurement Settings	Measurement Settings		Measurement Settings	Measurement Settings		Measurement Settings	Measurement Settings		Measurement Settings	Measurement Settings		Measurement Settings	Measurement Settings		Measurement Settings	Measurement Settings		Measurement Settings	Measurement Settings		Measurement Settings	Measurement Settings		Measurement Settings	Measurement Settings		Measurement Settings	Measurement Settings		Measurement Settings	Measurement Settings		Measurement Settings	Measurement Settings		Measurement Settings	Measurement Settings		Measurement Settings	Measurement Settings		Measurement Settings	Measurement Settings		Measurement Settings	Measurement Settings
MST-Power:	Medium		MST-Power:	Medium		MST-Power:	Medium		MST-Power:	Medium		MST-Power:	Medium		MST-Power:	Medium		MST-Power:	Medium		MST-Power:	Medium		MST-Power:	Medium		MST-Power:	Medium		MST-Power:	Medium		MST-Power:	Medium		MST-Power:	Medium		MST-Power:	Medium		MST-Power:	Medium		MST-Power:	Medium
Excitation-Power:	30		Excitation-Power:	30		Excitation-Power:	30		Excitation-Power:	30		Excitation-Power:	30		Excitation-Power:	30		Excitation-Power:	30		Excitation-Power:	30		Excitation-Power:	30		Excitation-Power:	30		Excitation-Power:	30		Excitation-Power:	30		Excitation-Power:	30		Excitation-Power:	30		Excitation-Power:	30		Excitation-Power:	30
Excitation type:	Pico - RED		Excitation type:	Pico - RED		Excitation type:	Pico - RED		Excitation type:	Pico - RED		Excitation type:	Pico - RED		Excitation type:	Pico - RED		Excitation type:	Pico - RED		Excitation type:	Pico - RED		Excitation type:	Pico - RED		Excitation type:	Pico - RED		Excitation type:	Pico - RED		Excitation type:	Pico - RED		Excitation type:	Pico - RED		Excitation type:	Pico - RED		Excitation type:	Pico - RED		Excitation type:	Pico - RED
Thermostat Setpoint:	25		Thermostat Setpoint:	25		Thermostat Setpoint:	25		Thermostat Setpoint:	25		Thermostat Setpoint:	25		Thermostat Setpoint:	25		Thermostat Setpoint:	25		Thermostat Setpoint:	25		Thermostat Setpoint:	25		Thermostat Setpoint:	25		Thermostat Setpoint:	25		Thermostat Setpoint:	25		Thermostat Setpoint:	25		Thermostat Setpoint:	25		Thermostat Setpoint:	25		Thermostat Setpoint:	25
Included	Included		Included	Included		Included	Included		Included	Included		Included	Included		Included	Included		Included	Included		Included	Included		Included	Included		Included	Included		Included	Included		Included	Included		Included	Included		Included	Included		Included	Included		Included	Included
Position [mm]	Relative Fluorescence [-]		Position [mm]	Relative Fluorescence [-]		Position [mm]	Relative Fluorescence [-]		Position [mm]	Relative Fluorescence [-]		Position [mm]	Relative Fluorescence [-]		Position [mm]	Relative Fluorescence [-]		Position [mm]	Relative Fluorescence [-]		Position [mm]	Relative Fluorescence [-]		Position [mm]	Relative Fluorescence [-]		Position [mm]	Relative Fluorescence [-]		Position [mm]	Relative Fluorescence [-]		Position [mm]	Relative Fluorescence [-]		Position [mm]	Relative Fluorescence [-]		Position [mm]	Relative Fluorescence [-]		Position [mm]	Relative Fluorescence [-]		Position [mm]	Relative Fluorescence [-]
-2.24878	0.004745		-2.24333	0.00205802		-2.24787	0.00226005		-2.24934	0.00216815		-2.24935	0.00116686		-2.24964	0.00171483		-2.24904	0.000981416		-2.24494	0.000401476		-2.2485	0.00221091		-2.24626	0.00151911		-2.24445	0.00146599		-2.24325	0.00121991		-2.24879	0.0012054		-2.24251	0.000505701		-2.24725	0.00159722		-2.24979	0.00172044
-2.24409	0.00355789		-2.23676	0.00309258		-2.2435	0.00238998		-2.24153	0.00180216		-2.24153	0.000693564		-2.24401	0.00210595		-2.24061	0.00233906		-2.23869	0.000866756		-2.24475	0.00242598		-2.23876	0.00109489		-2.23633	0.00146384		-2.23887	0.000242976		-2.2441	0.00159449		-2.23689	3.99059e-05		-2.2435	0.00130572		-2.24479	0.00246812
-2.23909	0.0041755		-2.23239	0.00180531		-2.236	0.00259015		-2.23434	0.00201423		-2.23404	0.00111452		-2.24057	0.00272016		-2.23498	0.00202339		-2.23463	0.00129879		-2.2385	0.00181687		-2.23376	0.000877615		-2.23101	0.00170191		-2.23387	0.000784294		-2.23942	0.00242913		-2.23345	0.000605805		-2.23913	0.000651887		-2.24104	0.00290993
-2.2319	0.00451707		-2.22739	0.00310195		-2.22818	0.00357834		-2.22966	0.00200693		-2.22997	0.00157319		-2.23463	0.00298061		-2.23154	0.00131165		-2.22869	0.00178563		-2.231	0.00166779		-2.22938	0.00104147		-2.22695	0.00230149		-2.22606	0.00136245		-2.23223	0.00168588		-2.22751	0.00123573		-2.23163	0.00113017		-2.23448	0.00283596
-2.2244	0.00485949		-2.21989	0.00416723		-2.2235	0.00393436		-2.22497	0.0011233		-2.22591	0.000827703		-2.22682	0.0013582		-2.22592	0.000569943		-2.22025	0.000640519		-2.22506	0.00217951		-2.2222	0.0014576		-2.22008	0.0029279		-2.21888	0.00143658		-2.22442	0.00187471		-2.2197	0.000439191		-2.22475	0.00101486		-2.22667	0.00191975
-2.2194	0.00543382		-2.21239	0.00299193		-2.21975	0.00293561		-2.21747	0.000994459		-2.21872	0.000683468		-2.22089	0.0015793		-2.21811	0.0015771		-2.21401	0.000811938		-2.22069	0.00149779		-2.21407	0.00130565		-2.21164	0.00214006		-2.21481	0.000753865		-2.2191	0.00138949		-2.21376	0.000405824		-2.21975	0.000535286		-2.22136	0.00273122
-2.21471	0.00555572		-2.20739	0.00386028		-2.21318	0.00300892		-2.20966	0.00185233		-2.21122	0.00119138		-2.21651	0.00194234		-2.21186	0.00153574		-2.21057	0.00281392		-2.21475	0.00248343		-2.20938	0.00187868		-2.20633	0.00167894		-2.21012	0.000674246		-2.21473	0.00158953		-2.20969	0.000850201		-2.21506	0.000403786		-2.21698	0.00242988
-2.20784	0.00476949		-2.20302	0.00294248		-2.20568	0.00335418		-2.20528	0.00187331		-2.20622	0.00120787		-2.21089	0.00210971		-2.20748	0.0017151		-2.20525	0.00198042		-2.20694	0.00312671		-2.20563	0.000790976		-2.20289	0.00145826		-2.20294	0.00130045		-2.20817	0.00139704		-2.20376	0.00102786		-2.20819	0.000237737		-2.21073	0.00169194
-2.20003	0.00465242		-2.19583	0.00214712		-2.20037	0.00289876		-2.20153	0.00227579		-2.20185	0.0012942		-2.20308	0.00285016		-2.20217	0.00180246		-2.19775	0.00193796		-2.20006	0.00237087		-2.19938	0.00150586		-2.19664	0.00156088		-2.19575	0.000955658		-2.20004	0.000723414		-2.19595	0.000552371		-2.20038	0.000529456		-2.2026	0.00227492
-2.19471	0.00522088		-2.18802	0.00211814		-2.196	0.00337318		-2.19466	0.00286731		-2.19529	0.00131233		-2.1962	0.00270711		-2.19436	0.00205736		-2.19119	0.0015084		-2.196	0.00181858		-2.19157	0.0017375		-2.18883	0.000982336		-2.19106	0.00147822		-2.19442	0.0010834		-2.18907	0.000545157		-2.19475	0.00124094		-2.19635	0.00224709
-2.19034	0.00470656		-2.18302	0.00304008		-2.18975	0.00336474		-2.18716	0.00247212		-2.18747	0.00107435		-2.19182	0.00183687		-2.18717	0.000759853		-2.18682	0.000791044		-2.19069	0.00215218		-2.18626	0.00121026		-2.18289	0.00158599		-2.18637	0.0021941		-2.19036	0.00152012		-2.1847	0.00040402		-2.19069	0.000640659		-2.19198	0.00207946
-2.18346	0.00448431		-2.17864	0.0034492		-2.18193	0.00303253		-2.18184	0.00168791		-2.18154	0.00112751		-2.18683	0.00139954		-2.1828	0.00137938		-2.1815	0.00127542		-2.18288	0.00148241		-2.18188	0.00157836		-2.17851	0.00186786		-2.1795	0.00186647		-2.18379	0.00103727		-2.1797	0.00052216		-2.18413	0.000848814		-2.18667	0.00136572
-2.17534	0.00482121		-2.17145	0.00382542		-2.17568	0.00292659		-2.17747	0.0019465		-2.17716	0.00107331		-2.17901	0.0013456		-2.17779	0.001464		-2.174	0.00199839		-2.17569	0.00191618		-2.17563	0.00183581		-2.17289	0.00123393		-2.17169	0.00144802		-2.17567	0.0016833		-2.17188	0.000894616		-2.17631	0.00161061		-2.17854	0.00114719
-2.17034	0.00435275		-2.16364	0.00293137		-2.17131	0.00342788		-2.17091	0.00338084		-2.17122	0.000839036		-2.17183	0.00146189		-2.17029	0.00111098		-2.1665	0.0012024		-2.17132	0.00180726		-2.16751	0.000832276		-2.16508	0.00143808		-2.16575	0.00153084		-2.17004	0.00228966		-2.1647	0.000147449		-2.17038	0.002253		-2.17167	0.0019944
-2.16659	0.00354048		-2.15864	0.00259654		-2.16568	0.00264331		-2.16278	0.00264201		-2.1631	0.000164016		-2.16714	0.00141502		-2.16279	0.00158259		-2.16182	0.000983357		-2.16631	0.00214321		-2.16126	0.00138129		-2.1582	0.0016871		-2.16169	0.00116317		-2.16629	0.00137225		-2.16001	0.000245298		-2.16631	0.00176327		-2.16729	0.00221316
-2.16034	0.00476139		-2.1552	0.00329954		-2.15787	0.00267056		-2.15684	0.00151187		-2.15685	0.00177224		-2.16245	0.00119989		-2.1578	0.0014621		-2.15713	0.00123049		-2.1585	0.00189012		-2.1572	0.00164278		-2.15383	0.00142091		-2.15544	0.00097808		-2.16067	0.0014533		-2.15532	0.000544706		-2.16006	0.00165768		-2.16198	0.00197449
-2.15284	0.0053602		-2.14864	0.00364657		-2.151	0.00308914		-2.15278	0.00200032		-2.15279	0.000721588		-2.15495	0.00209976		-2.15342	0.00132241		-2.14994	0.00176744		-2.15131	0.0013989		-2.15157	0.00197183		-2.14851	0.00140739		-2.14731	0.000898003		-2.15285	0.00174301		-2.14751	0.00032015		-2.15163	0.000650376		-2.15416	0.00106507
-2.1469	0.00503881		-2.14083	0.00292832		-2.14662	0.00298243		-2.14684	0.00284633		-2.14685	0.000737865		-2.14714	0.00203962		-2.14592	0.00203014		-2.14213	0.000749481		-2.14725	0.00213338		-2.14345	0.00234263		-2.1407	0.00188868		-2.14138	0.00179875		-2.14661	0.00039167		-2.14001	9.24384e-06		-2.14569	0.000553856		-2.14698	0.00158267
-2.14284	0.00379066		-2.1352	0.00263553		-2.14131	0.00333979		-2.13872	0.00205163		-2.13841	0.000373363		-2.14276	0.000617082		-2.13811	0.00196536		-2.13713	0.000934605		-2.14288	0.0023429		-2.13657	0.00227462		-2.13351	0.00154714		-2.13731	0.00161183		-2.14223	0.00107607		-2.13595	0.00101208		-2.14225	0.00121719		-2.14292	0.00131165
-2.1369	0.00396377		-2.13083	0.00303136		-2.13318	0.00367738		-2.13247	0.00188721		-2.13216	0.000705721		-2.1387	0.00163081		-2.13342	0.00246504		-2.13276	0.0014046		-2.13569	0.0018882		-2.13251	0.00161921		-2.12914	0.0014383		-2.13137	0.00188638		-2.13692	0.00135069		-2.13188	0.00104905		-2.13662	0.00139123		-2.13854	0.00206544
-2.12878	0.00475432		-2.12489	0.0035542		-2.126	0.00342942		-2.12841	0.00216587		-2.12872	0.00146131		-2.13182	0.00159765		-2.12967	0.00110359		-2.12557	0.00115882		-2.12819	0.00137071		-2.12719	0.00178194		-2.12445	0.0014149		-2.12294	0.00217168		-2.12911	0.00166821		-2.1247	0.000795415		-2.12912	0.00156289		-2.13104	0.00225931
-2.12221	0.00481052		-2.11708	0.00232553		-2.12225	0.00314134		-2.12278	0.00225731		-2.12341	0.00168199		-2.12433	0.00122289		-2.12311	0.00166277		-2.11744	0.000660963		-2.1235	0.00221732		-2.11907	0.00157028		-2.11633	0.00109869		-2.11669	0.00175482		-2.12192	0.00143864		-2.1172	0.000834193		-2.12256	0.00169093		-2.12385	0.00188016
-2.11815	0.00534451		-2.11052	0.0031538		-2.11787	0.0028646		-2.11435	0.00291793		-2.11591	0.00161667		-2.11932	0.00158925		-2.11529	0.0024701		-2.11276	0.000649056		-2.11881	0.00238113		-2.1122	0.00152674		-2.10883	0.00131722		-2.11325	0.00218152		-2.11754	0.000656807		-2.1122	0.00153672		-2.11819	0.000809731		-2.11917	0.00172248
-2.11284	0.00491398		-2.10614	0.00309214		-2.11037	0.00321677		-2.10778	0.00217271		-2.10935	0.00112174		-2.11495	0.00115368		-2.10998	0.00247179		-2.10901	0.00033857		-2.11194	0.00146447		-2.10813	0.00155165		-2.10477	0.00116373		-2.10794	0.00245652		-2.11286	0.000432411		-2.10783	0.000776927		-2.11287	0.00171102		-2.11448	0.0019858
-2.10503	0.00575918		-2.10083	0.00367946		-2.10318	0.00350676		-2.10434	0.00135475		-2.10497	0.000792262		-2.10839	0.000939884		-2.10592	0.00102151		-2.10275	0.000673544		-2.10413	0.00174767		-2.10376	0.00155928		-2.1007	0.00177898		-2.10044	0.00126453		-2.10504	0.00134034		-2.10095	0.000479774		-2.10537	0.001361		-2.1076	0.0018193
-2.09784	0.00518468		-2.09302	0.00269305		-2.0985	0.0032421		-2.09934	0.00201423		-2.09966	0.000392731		-2.10057	0.000940326		-2.09967	0.0011709		-2.09494	0.000829461		-2.09819	0.0012415		-2.09626	0.00090455		-2.09352	0.00195673		-2.09388	0.00161778		-2.09754	0.00108663		-2.09313	3.62988e-05		-2.09819	0.000920286		-2.09979	0.0018797
-2.09346	0.00537848		-2.08614	0.00247738		-2.09381	0.00283446		-2.09153	0.00200648		-2.09216	0.000588685		-2.09464	0.000885052		-2.09154	0.00159314		-2.08932	0.000977066		-2.09413	0.00102408		-2.08938	0.0021294		-2.08601	0.00167315		-2.0895	0.00133545		-2.09286	0.00112888		-2.0872	0.000505927		-2.0935	0.000415014		-2.09417	0.00154557
-2.08878	0.00562073		-2.08177	0.0024704		-2.08693	0.00244621		-2.08466	0.00138508		-2.08466	0.000678729		-2.09057	0.00112118		-2.0853	0.0012456		-2.08494	0.000771049		-2.08788	0.00257462		-2.08438	0.00126884		-2.08102	0.00218407		-2.08419	0.00189942		-2.08848	0.00172555		-2.08314	0.00115231		-2.08881	0.00119106		-2.09011	0.00203806
-2.08065	0.00465069		-2.07645	0.00366291		-2.07912	0.00264888		-2.08028	0.00224272		-2.07997	0.00135931		-2.08464	0.00093303		-2.08123	0.000923176		-2.07901	0.000642541		-2.07975	0.00165092		-2.0797	0.000588743		-2.07664	0.00207351		-2.07669	0.0017745		-2.08098	0.00166842		-2.07688	0.00195765		-2.08132	0.00151625		-2.08355	0.00156955
-2.07315	0.00460879		-2.06864	0.0040888		-2.07381	0.00229459		-2.07528	0.00172873		-2.07528	0.00139908		-2.07651	0.000879082		-2.07561	0.000806697		-2.07119	0.00132754		-2.07381	0.00177522		-2.07282	0.00136827		-2.06977	0.00159823		-2.06919	0.00200077		-2.07317	0.00162229		-2.06876	0.000350136		-2.0735	0.000578472		-2.07542	0.00206385
-2.06909	0.00413757		-2.06145	0.00370517		-2.06943	0.00287381		-2.06809	0.00220806		-2.0681	0.00134324		-2.07026	0.00115634		-2.06748	0.00121247		-2.06463	0.000998409		-2.06975	0.00187987		-2.06501	0.00182908		-2.06164	0.0021143		-2.06449	0.00178182		-2.06848	0.00165592		-2.06251	0.000289938		-2.06881	0.00109778		-2.06979	0.00163312
-2.06503	0.00499605		-2.0577	0.00302243		-2.06287	0.00273985		-2.06028	0.00273482		-2.06029	0.000685528		-2.06589	0.00120233		-2.06061	0.00101497		-2.06057	0.00188606		-2.0635	0.00258509		-2.05938	0.00184815		-2.05601	0.00230321		-2.05981	0.00224009		-2.06473	0.000975833		-2.05845	0		-2.06444	0.00228236		-2.06573	0.00172293
-2.05784	0.00504984		-2.05333	0.00263946		-2.05475	0.00321773		-2.05528	0.00142294		-2.05529	0.00056808		-2.06026	0.000937009		-2.05654	0.00108544		-2.05526	0.00174856		-2.05538	0.00124406		-2.05532	0.0026847		-2.05195	0.00140674		-2.05231	0.00155852		-2.05786	0.000765233		-2.05251	0.000869815		-2.05694	0.00233742		-2.05917	0.00157588
-2.05065	0.00436654		-2.04583	0.00292789		-2.04912	0.00320967		-2.05091	0.00238638		-2.05091	0.00114152		-2.05214	0.00122245		-2.05092	0.00176596		-2.04713	0.00070657		-2.04913	0.00138096		-2.04876	0.001933		-2.0457	0.00111543		-2.04481	0.000540632		-2.05036	0.000896077		-2.04439	0.000857415		-2.04881	0.00199712		-2.05104	0.0018702
-2.04565	0.00461569		-2.03895	0.00291046		-2.04506	0.00264254		-2.04403	0.00216838		-2.04372	0.00100326		-2.04557	0.000909814		-2.04279	0.00124476		-2.04025	0.000380807		-2.04569	0.00242427		-2.04064	0.00202121		-2.03758	0.00147329		-2.03981	0.00103642		-2.04504	0.00170227		-2.03782	0.000710417		-2.04444	0.00103019		-2.0451	0.00290609
-2.04096	0.00451569		-2.03395	0.00312068		-2.03881	0.00245696		-2.03622	0.0017399		-2.03591	0.000343279		-2.04182	0.00161755		-2.03623	0.00056319		-2.03588	0.000548631		-2.04007	0.00138737		-2.0347	0.00181314		-2.03164	0.00187408		-2.03543	0.00162716		-2.04067	0.00163048		-2.03439	0.000566124		-2.04069	0.00114895		-2.04167	0.00251178
-2.03409	0.00455603		-2.02927	0.0030111		-2.03037	0.00255177		-2.03091	0.00153239		-2.03091	0.00108774		-2.03682	0.00154878		-2.03248	0.00123969		-2.03057	0.00160747		-2.03257	0.00148198		-2.03095	0.00200707		-2.02758	0.00135415		-2.02825	0.00142537		-2.03411	0.00219072		-2.02908	0.00154957		-2.03413	0.0015387		-2.03605	0.00265837
-2.02628	0.0043312		-2.02239	0.00256495		-2.02475	0.0028646		-2.02684	0.00107313		-2.02716	0.00064164		-2.02932	0.00162971		-2.02779	0.00173388		-2.02276	0.00168476		-2.026	0.00181601		-2.0247	0.00152337		-2.02133	0.00110942		-2.02012	0.00166125		-2.02629	0.00146127		-2.02126	0.000431301		-2.02631	0.00123813		-2.02823	0.00197902
-2.02065	0.00446396		-2.01458	0.00316948		-2.02131	0.00302197		-2.01997	0.00194012		-2.02091	0.000557571		-2.02245	0.00175662		-2.02029	0.00153363		-2.01557	0.00139562		-2.02163	0.00308955		-2.01626	0.00123068		-2.0132	0.00244253		-2.01544	0.00167452		-2.02004	0.00165808		-2.0147	0.00122717		-2.021	0.00136229		-2.02198	0.000926392
-2.01659	0.00427895		-2.00895	0.00408488		-2.01537	0.00304327		-2.01153	0.00286662		-2.01341	0.000486278		-2.01776	0.00231511		-2.01311	0.00235806		-2.01151	0.00143134		-2.01631	0.00277688		-2.01032	0.00188295		-2.00695	0.00280726		-2.01168	0.000999815		-2.01598	0.00226703		-2.01032	0.00232334		-2.01694	0.00141455		-2.01761	0.0012879
-2.01034	0.00390721		-2.00489	0.00304356		-2.00756	0.00272929		-2.00653	0.00181972		-2.00779	0.000719115		-2.01307	0.00144841		-2.00842	0.00169105		-2.00713	0.00138393		-2.0085	0.00246506		-2.00688	0.00151103		-2.0032	0.00186034		-2.00512	0.0011753		-2.01004	0.00106529		-2.00533	0.00121634		-2.01069	0.00222406		-2.0123	0.0024568
-2.00221	0.00428551		-1.99833	0.00328429		-2.00162	0.00269743		-2.00309	0.0017415		-2.00341	0.000714994		-2.00557	0.00151849		-2.00373	0.000947654		-1.99994	0.000923596		-2.00132	0.00219446		-2.00126	0.00115841		-1.9982	0.00131765		-1.99762	0.00183925		-2.00223	0.000670602		-1.99751	0.00168642		-2.00256	0.00197445		-2.00448	0.00295246
-1.99628	0.00524968		-1.99021	0.00312591		-1.99725	0.0033918		-1.99684	0.00241101		-1.99747	0.00102304		-1.99807	0.000788211		-1.99654	0.00177946		-1.99276	0.00162432		-1.99663	0.00184847		-1.99345	0.000970091		-1.99039	0.00254536		-1.992	0.0018683		-1.99567	0.00141881		-1.99001	0.00121138		-1.99631	0.00129686		-1.9973	0.0024464
-1.99221	0.00497225		-1.98427	0.00346205		-1.99193	0.00285385		-1.98903	0.0024931		-1.98935	0.00080648		-1.99307	0.00092507		-1.98873	0.00219515		-1.98776	0.00211724		-1.99194	0.00135875		-1.98751	0.00121991		-1.98383	0.00238521		-1.98762	0.000816096		-1.99129	0.00116208		-1.98501	0.00152477		-1.99194	0.00154238		-1.9926	0.0015277
-1.98596	0.00557538		-1.98052	0.00343308		-1.98412	0.00301775		-1.98309	0.00186601		-1.98279	0.000513065		-1.9887	0.00145814		-1.98342	0.00149122		-1.98338	0.000459888		-1.98475	0.00197021		-1.98313	0.00167331		-1.97945	0.00186399		-1.98168	0.000890911		-1.98598	0.00123925		-1.98064	0.000662845		-1.98663	0.0019386		-1.98792	0.00118972
-1.97752	0.00497243		-1.97427	0.00381976		-1.97693	0.00291641		-1.97903	0.00155337		-1.97872	0.000863968		-1.98182	0.00104026		-1.97904	0.00128485		-1.97651	0.000595811		-1.97694	0.00316366		-1.97751	0.00151282		-1.97445	0.00247688		-1.97356	0.0013716		-1.97785	0.00100472		-1.97376	0.000899125		-1.9785	0.00166956		-1.98042	0.00184328
-1.97159	0.00363134		-1.96583	0.00394807		-1.97256	0.00317474		-1.97309	0.00178779		-1.97341	0.000826261		-1.9737	0.00141259		-1.97248	0.000656457		-1.96838	0.000928089		-1.97194	0.00267927		-1.97001	0.0015934		-1.96695	0.00171608		-1.96731	0.000997298		-1.97098	0.000593217		-1.96595	0.000921671		-1.97163	0.00128413		-1.97292	0.0021799
-1.96815	0.00361962		-1.95989	0.00358971		-1.96756	0.00274561		-1.96528	0.00263426		-1.96529	0.000883955		-1.96839	0.00124964		-1.96436	0.00212932		-1.96307	0.00136237		-1.96756	0.00186748		-1.96282	0.00154514		-1.95945	0.00191787		-1.96293	0.00176947		-1.96723	0.0014063		-1.96063	0.000751901		-1.96756	0.000815993		-1.96823	0.0025396
-1.96253	0.00396101		-1.95645	0.00424435		-1.96006	0.00243335		-1.9584	0.00242515		-1.95841	0.00060929		-1.96433	0.000803688		-1.95873	0.00246462		-1.959	0.00124532		-1.96038	0.00257356		-1.95813	0.000682116		-1.95445	0.00281177		-1.95731	0.00140317		-1.96254	0.00140695		-1.95626	0.000346078		-1.96194	0.000610645		-1.96386	0.00250725
-1.95503	0.00447413		-1.95083	0.00398227		-1.95256	0.00269244		-1.95403	0.00210453		-1.95403	0.000680171		-1.95745	0.00160428		-1.95467	0.00147244		-1.95244	0.000769476		-1.95257	0.00224401		-1.95345	0.00134381		-1.95008	0.00231759		-1.9495	0.00116386		-1.95473	0.00124356		-1.94939	0.00155183		-1.95381	0.000718177		-1.95636	0.00188106
-1.94878	0.00465017		-1.94333	0.00400014		-1.94787	0.00337856		-1.94903	0.00307733		-1.94872	0.000474121		-1.94933	0.00226094		-1.94811	0.00161171		-1.94432	0.000576939		-1.94756	0.00145806		-1.94595	0.00181134		-1.94289	0.00195136		-1.94262	0.00161274		-1.94786	0.00140329		-1.94126	0.00187152		-1.94694	0.000891999		-1.94854	0.00195504
-1.94409	0.00435292		-1.93677	0.00469333		-1.94318	0.00270876		-1.94122	0.00256197		-1.94091	0.000673371		-1.94401	0.000910478		-1.93998	0.00145893		-1.93838	0.00113838		-1.94413	0.0014602		-1.93845	0.00237248		-1.93508	0.00129812		-1.93825	0.00132859		-1.94348	0.00198335		-1.93626	0.00185168		-1.94319	0.00147112		-1.94385	0.00207652
-1.93909	0.0051445		-1.93239	0.00458223		-1.93568	0.00236426		-1.93403	0.00167537		-1.93372	0.000725296		-1.94058	0.00120984		-1.93436	0.0011401		-1.93432	0.00100268		-1.93756	0.00172418		-1.93345	0.00251344		-1.93008	0.00242772		-1.93325	0.000981054		-1.93848	0.0015863		-1.93282	0.000648191		-1.9385	0.00146119		-1.94011	0.002022
-1.93159	0.0051733		-1.92739	0.00422605		-1.92787	0.00287074		-1.92934	0.00188836		-1.92966	0.00110319		-1.93432	0.0011077		-1.93092	0.00156803		-1.92838	0.000606145		-1.92975	0.0019495		-1.92907	0.00220391		-1.92601	0.00248182		-1.92512	0.00123135		-1.93129	0.001585		-1.92658	0.00126324		-1.93131	0.00202152		-1.93354	0.0012793
-1.92409	0.0048776		-1.91989	0.00328603		-1.9235	0.00314115		-1.92466	0.00177753		-1.92529	0.000787111		-1.92682	0.000795507		-1.92498	0.0013663		-1.91994	0.000386648		-1.92444	0.0010542		-1.92157	0.0019514		-1.91883	0.00187022		-1.91793	0.00209229		-1.92348	0.00102433		-1.91876	0.00116449		-1.92444	0.00203383		-1.92573	0.00153788
-1.9194	0.00481259		-1.91239	0.00416984		-1.91943	0.00331542		-1.91684	0.00191298		-1.9181	0.000796384		-1.92089	0.00138761		-1.91717	0.00116711		-1.91369	0.000457192		-1.92006	0.00133184		-1.91376	0.00116985		-1.9107	0.00200997		-1.91387	0.00176855		-1.91848	0.00182384		-1.91282	0.00177706		-1.91975	0.00215669		-1.92041	0.00143676
-1.91471	0.00462362		-1.9077	0.00450402		-1.91256	0.00287918		-1.90934	0.00239026		-1.91091	0.00111246		-1.91651	0.00126269		-1.91123	0.0012169		-1.91026	0.00140146		-1.91381	0.00249154		-1.90907	0.00124954		-1.9057	0.00261985		-1.9095	0.00196508		-1.91442	0.00213166		-1.90876	0.00240225		-1.91506	0.00121071		-1.91636	0.00156208
-1.90753	0.0048888		-1.90302	0.00432887		-1.90537	0.00258593		-1.90528	0.00260119		-1.90591	0.00147635		-1.91057	0.00153198		-1.90686	0.000934993		-1.90494	0.00160096		-1.90569	0.00240056		-1.90532	0.0010583		-1.90195	0.00231974		-1.90231	0.00183925		-1.90754	0.00242439		-1.90283	0.00195156		-1.90788	0.00151776		-1.90979	0.000654696
-1.89971	0.00420878		-1.89552	0.0041291		-1.90006	0.0027149		-1.90122	0.0021563		-1.90153	0.00113266		-1.90276	0.00126246		-1.90155	0.000801422		-1.89713	0.0017061		-1.89944	0.00141727		-1.89845	0.00109085		-1.8957	0.0022592		-1.89512	0.0020328		-1.89942	0.00168653		-1.8947	0.00152184		-1.90006	0.00149055		-1.90198	0.00129672
-1.89471	0.00432585		-1.88802	0.00516672		-1.89568	0.00226734		-1.89403	0.00127312		-1.89466	0.000711697		-1.8962	0.00161666		-1.89373	0.00156423		-1.89088	0.00170408		-1.89538	0.00264574		-1.89126	0.00158397		-1.88789	0.00187322		-1.89044	0.00163082		-1.89411	0.0013841		-1.88814	0.00170626		-1.89475	0.000796559		-1.89573	0.00166162
-1.89034	0.00488863		-1.88302	0.00486565		-1.88912	0.0026151		-1.88684	0.00181858		-1.88654	0.000918159		-1.89182	0.00220876		-1.88654	0.00123948		-1.88651	0.000844065		-1.88975	0.00109883		-1.88595	0.00118265		-1.88227	0.00131336		-1.88575	0.00137206		-1.89004	0.00192968		-1.88376	0.00125693		-1.89069	0.000542627		-1.89135	0.00132523
-1.88315	0.00423757		-1.87864	0.00571395		-1.88131	0.00260742		-1.88153	0.00267074		-1.88122	0.000886015		-1.88651	0.00202193		-1.88186	0.00107067		-1.88119	0.00143448		-1.88163	0.000918364		-1.88157	0.00082038		-1.87789	0.00115472		-1.87856	0.000914476		-1.88317	0.00186544		-1.87845	0.00107047		-1.88381	0.00151862		-1.88573	0.00143857
-1.87534	0.00452155		-1.87145	0.00469137		-1.87506	0.00340562		-1.87715	0.00289832		-1.87716	0.00141289		-1.87901	0.00174777		-1.87717	0.00137432		-1.87369	0.00122397		-1.87475	0.00159753		-1.87501	0.000906795		-1.87195	0.001671		-1.87075	0.00148943		-1.87504	0.0011125		-1.87064	0.00147472		-1.87569	0.000787706		-1.87761	0.00181432
-1.87065	0.00415205		-1.86333	0.00460772		-1.871	0.0027955		-1.87059	0.00145874		-1.8706	0.000829969		-1.87182	0.0022532		-1.86936	0.00136778		-1.86651	0.00161242		-1.87069	0.00190593		-1.8672	0.00177364		-1.86414	0.00201169		-1.86512	0.00208657		-1.86942	5.62607e-05		-1.86345	0.0017013		-1.87006	0.000855939		-1.87104	0.00168673
-1.8669	0.00475604		-1.85864	0.00435545		-1.86537	0.00187141		-1.86247	0.00236449		-1.86247	0.000498229		-1.86714	0.00236353		-1.86186	0.00120973		-1.86182	0.00173104		-1.86538	0.00137904		-1.86095	0.00166725		-1.85726	0.0022006		-1.86106	0.00181889		-1.86598	0.00094544		-1.85907	0.00198854		-1.866	0.00137784		-1.86667	0.00128677
-1.86034	0.00515795		-1.8552	0.00464279		-1.85725	0.00311946		-1.85684	0.00187011		-1.85653	0.000446099		-1.86245	0.00221981		-1.85717	0.00113756		-1.85713	0.00192538		-1.85725	0.00210903		-1.85688	0.000736883		-1.8532	0.00158986		-1.8545	0.00184474		-1.86004	0.00124873		-1.85439	0.00128691		-1.85944	0.0016864		-1.86104	0.0018193
-1.85284	0.0052583		-1.84864	0.00395526		-1.85068	0.00340485		-1.85278	0.00191435		-1.85247	0.000704897		-1.85464	0.00143912		-1.8528	0.00132937		-1.84963	0.00123655		-1.85038	0.0023414		-1.85126	0.00124348		-1.84789	0.00163902		-1.84637	0.00190537		-1.85223	0.00170097		-1.84626	0.00115051		-1.85131	0.00144715		-1.85292	0.00264751
-1.84753	0.00424137		-1.84083	0.004992		-1.84662	0.00349601		-1.84653	0.00182382		-1.84653	0.00062021		-1.84714	0.00150036		-1.84498	0.00179592		-1.84213	0.00115455		-1.84631	0.0012934		-1.84313	0.000967622		-1.83977	0.00171243		-1.84043	0.00186258		-1.84629	0.000877539		-1.83907	0.000837124		-1.84569	0.00131673		-1.84604	0.0024982
-1.84315	0.00375342		-1.83552	0.00493188		-1.841	0.00256002		-1.83841	0.00159373		-1.8381	0.000718084		-1.84308	0.00183687		-1.83748	0.000991333		-1.83713	0.00164724		-1.84194	0.00123253		-1.83626	0.000437461		-1.83289	0.00207544		-1.83669	0.00115699		-1.84192	0.00113944		-1.83501	0.00100036		-1.84225	0.000293015		-1.84229	0.00208942
-1.8369	0.00397136		-1.83114	0.00468244		-1.83287	0.00198368		-1.83216	0.00147607		-1.83185	0.000674196		-1.83901	0.00131509		-1.83311	0.00139648		-1.83244	0.000955948		-1.83444	0.00219062		-1.83219	0.00149554		-1.82851	0.00205119		-1.83043	0.00044454		-1.83629	0.000569506		-1.83064	0.000236731		-1.83631	0.000855939		-1.8376	0.00214009
-1.82878	0.00508812		-1.82489	0.00445806		-1.82631	0.00265943		-1.82809	0.00120995		-1.82841	0.00116068		-1.83183	0.000977912		-1.82904	0.00160559		-1.82526	0.00141426		-1.82725	0.00158792		-1.82688	0.00123899		-1.8232	0.00227337		-1.822	0.00116683		-1.82848	0.000734623		-1.82345	0.000573339		-1.8285	0.00131436		-1.83011	0.0012879
-1.82253	0.00498674		-1.81708	0.00523381		-1.82256	0.00244007		-1.82247	0.00189337		-1.8231	0.00183261		-1.82463	0.00161069		-1.82217	0.00153152		-1.81744	0.00114332		-1.82256	0.00172738		-1.81844	0.00187464		-1.81539	0.00269305		-1.81637	0.00129999		-1.8216	0.000849085		-1.81626	0.000220046		-1.82256	0.00120941		-1.82292	0.00104561
-1.81815	0.00439706		-1.81083	0.00477633		-1.81756	0.0029262		-1.81434	0.0026623		-1.81528	0.00157711		-1.81964	0.00143713		-1.81467	0.0018128		-1.81276	0.00197166		-1.81788	0.00280251		-1.81188	0.00148454		-1.8082	0.00295216		-1.81263	0.00187654		-1.81723	0.00123752		-1.81126	0.000545608		-1.81819	0.00176241		-1.81854	0.00152159
-1.81284	0.00489432		-1.80646	0.00646444		-1.81006	0.00266212		-1.80809	0.00164025		-1.80904	0.000852841		-1.81526	0.00152491		-1.80967	0.00165855		-1.80901	0.00111097		-1.811	0.00221539		-1.80814	0.00185646		-1.80414	0.00257327		-1.80699	0.000885648		-1.81223	0.00105322		-1.80689	0.00106912		-1.81288	0.00176478		-1.81354	0.00147974
-1.80503	0.00480863		-1.80083	0.00578911		-1.80318	0.00207676		-1.80434	0.00235583		-1.80466	0.000636076		-1.80839	0.0014064		-1.80529	0.00206433		-1.80244	0.00189999		-1.80319	0.00232944		-1.80345	0.00155255		-1.79977	0.00183845		-1.79949	0.00114601		-1.80442	0.0013453		-1.80001	0.000772869		-1.80506	0.00133271		-1.80635	0.0017408
-1.79815	0.00554435		-1.79302	0.00455282		-1.7985	0.0025746		-1.79934	0.00220578		-1.79935	0.000698922		-1.80026	0.00217338		-1.79873	0.001966		-1.79494	0.00217857		-1.79756	0.00234973		-1.79595	0		-1.79258	0.00188782		-1.79325	0.0012055		-1.79692	0.00207367		-1.79189	0.00156017		-1.79788	0.000446971		-1.79854	0.00204621
-1.79378	0.00565262		-1.78614	0.00553619		-1.79381	0.00336512		-1.79153	0.00137345		-1.79185	0.00124042		-1.79464	0.00154348		-1.79061	0.00196093		-1.78963	0.00237605		-1.7935	0.00279354		-1.78876	0.000125021		-1.78508	0.00121847		-1.78887	0.000771025		-1.79254	0.000458709		-1.78626	0.00125264		-1.79319	0.000547162		-1.79323	0.00173424
-1.78846	0.00597419		-1.78177	0.00498198		-1.78662	0.00339871		-1.78497	0.00189428		-1.78466	0.00132016		-1.79057	0.00127551		-1.78467	0.00125088		-1.78526	0.00191976		-1.78694	0.00116547		-1.78407	0.00140396		-1.78039	0.000893891		-1.78324	0.000752492		-1.78786	0.00124679		-1.7822	0.000989308		-1.7885	0.00203275		-1.78885	0.00172293
-1.78065	0.006438		-1.77677	0.00418749		-1.77881	0.00318625		-1.78059	0.00163296		-1.77997	0.000736423		-1.78433	0.000571094		-1.78061	0.000626705		-1.77869	0.000417876		-1.77881	0.000892309		-1.77938	0.00144167		-1.7757	0.00163665		-1.77574	0.000876726		-1.78004	0.000784418		-1.77595	0.00154033		-1.78069	0.000898045		-1.78229	0.00159172
-1.77346	0.00643386		-1.76864	0.00384873		-1.77381	0.0021449		-1.77559	0.000927645		-1.77529	0.00025715		-1.7762	0.000995158		-1.77467	0.00192337		-1.77088	0.00131159		-1.77288	0.00114198		-1.7722	0.000916895		-1.76852	0.00174807		-1.76856	0.000838289		-1.77254	0.00113513		-1.76782	0.000914231		-1.77319	0.00104531		-1.77417	0.00268552
-1.7694	0.00471052		-1.76145	0.00351826		-1.76943	0.0021305		-1.76809	0.00138485		-1.76779	0.00117139		-1.77026	0.0012377		-1.76654	0.000522043		-1.76463	0.000771049		-1.76913	0.00182498		-1.76438	0.00164233		-1.7607	0.00138527		-1.76387	0.000701014		-1.76817	0.00125671		-1.76157	0.00130382		-1.7685	0.00050009		-1.76886	0.00229189
-1.76503	0.00416429		-1.7577	0.00573509		-1.76287	0.00285404		-1.76059	0.00177229		-1.75997	0.0014372		-1.7662	0.00171195		-1.75998	0.000177039		-1.76057	0.00129227		-1.76256	0.00133291		-1.75939	0.00164592		-1.75508	0.00236546		-1.75919	0.000562596		-1.76411	0.000984456		-1.75782	0.00138341		-1.76413	0.000907546		-1.76479	0.00192337
-1.75784	0.0053333		-1.75302	0.00470771		-1.75475	0.0031281		-1.75559	0.00216245		-1.75497	0.000525222		-1.75995	0.00119945		-1.75592	0.000543355		-1.75494	0.00107232		-1.75413	0.00218336		-1.75501	0.00181516		-1.75101	0.00146749		-1.75169	0.00144779		-1.75692	0.000871934		-1.75157	0.00136763		-1.75663	0.00104056		-1.75792	0.00156842
-1.75065	0.00527916		-1.74552	0.00455848		-1.74912	0.00286229		-1.75122	0.00180991		-1.7506	9.31347e-05		-1.75182	0.00102501		-1.75029	0.00125742		-1.74713	0.000595361		-1.7485	0.0021919		-1.74844	0.00177476		-1.74445	0.00154907		-1.74388	0.00192985		-1.74942	0.00129012		-1.74313	0.000732963		-1.74881	0.00166697		-1.74979	0.00118067
-1.74565	0.00495001		-1.73864	0.0041925		-1.74506	0.00273658		-1.74403	0.00186487		-1.74341	0.000299185		-1.74589	0.00168321		-1.74186	0.000414005		-1.74025	0.000112557		-1.74506	0.00270853		-1.74032	0.00218057		-1.73664	0.00198764		-1.73918	0.00115059		-1.74442	0.00127762		-1.7372	0.00155025		-1.74413	0.00166027		-1.74417	0.000691344
-1.74096	0.00531916		-1.73427	0.00462427		-1.7385	0.00301468		-1.73622	0.00241169		-1.73528	0.000561899		-1.74214	0.00165182		-1.73529	0.00113693		-1.73588	0.00133743		-1.73944	0.00236404		-1.7347	0.00181247		-1.7307	0.00256489		-1.73481	0.00036126		-1.74004	0.000907286		-1.73376	0.00104545		-1.74038	0.00102177		-1.74073	0.00137047
-1.73409	0.00479914		-1.72958	0.00459269		-1.73006	0.00285154		-1.73091	0.00245753		-1.7306	0.000453722		-1.73682	0.00155276		-1.73186	0.00180584		-1.73057	0.00168139		-1.73163	0.00184143		-1.73063	0.00126211		-1.72664	0.00210142		-1.72731	0.000721377		-1.73348	0.00141773		-1.72845	0.000713799		-1.7335	0.000290639		-1.73479	0.00199666
-1.72628	0.00401118		-1.72239	0.00457352		-1.72475	0.00321197		-1.72684	0.00258888		-1.72685	0.00122332		-1.72901	0.00169758		-1.72686	0.00247517		-1.72244	0.00117432		-1.72538	0.00198538		-1.72407	0.00137613		-1.72039	0.00132409		-1.7195	0.00144756		-1.72536	0.00156043		-1.72064	0.000611216		-1.726	0.00146831		-1.72729	0.00146096
-1.72065	0.00470449		-1.71458	0.00339278		-1.72131	0.0028479		-1.71997	0.00250245		-1.72029	0.00137106		-1.72245	0.00190608		-1.71936	0.00225846		-1.71557	0.000113905		-1.721	0.00210861		-1.71563	0.00239044		-1.71195	0.00201834		-1.71481	0.0015496		-1.71942	0.00141881		-1.71407	0.0011956		-1.72069	0.00164732		-1.72104	0.00194101
-1.71659	0.00494243		-1.70926	0.00421733		-1.71537	0.00281316		-1.71184	0.00251591		-1.71279	0.00157649		-1.71808	0.00156448		-1.71279	0.00159588		-1.71182	0.000704997		-1.71569	0.00168018		-1.71001	0.00173615		-1.70602	0.00161089		-1.71106	0.00180562		-1.71535	0.00163005		-1.70969	0.00121747		-1.71631	0.000381113		-1.71666	0.00182586
-1.71002	0.00437637		-1.70489	0.00321763		-1.70756	0.00270166		-1.70684	0.00258067		-1.70747	0.00119488		-1.71307	0.00117712		-1.70811	0.00204112		-1.70713	0.000754648		-1.70788	0.00131732		-1.70657	0.000759104		-1.70258	0.00113282		-1.70419	0.00133431		-1.70911	0.00136643		-1.7047	0.000801727		-1.71007	0.000699175		-1.71104	0.00223465
-1.70221	0.00401549		-1.69833	0.00364831		-1.70162	0.00251242		-1.70341	0.00118031		-1.7031	0.000595897		-1.70557	0.00177651		-1.70311	0.00130954		-1.69963	0.00130687		-1.70069	0.00198986		-1.70063	0.00125492		-1.69695	0.00205827		-1.697	0.00110346		-1.70098	0.00102132		-1.69689	0.00115119		-1.70194	0.00135344		-1.70354	0.00147159
-1.69627	0.00391135		-1.6902	0.00463909		-1.69725	0.00248191		-1.69684	0.000770985		-1.69685	0.00032185		-1.69807	0.00193681		-1.69561	0.00130405		-1.69275	0.000718702		-1.69632	0.00106359		-1.69313	0.00144436		-1.68945	0.00239573		-1.69168	0.00111947		-1.69473	0.00112478		-1.68939	0.00174504		-1.696	0.00129794		-1.69635	0.00155009
-1.69221	0.00543606		-1.68458	0.00460401		-1.69162	0.00254505		-1.68903	0.000892071		-1.68904	0.00105786		-1.69307	0.00156758		-1.68811	0.000460005		-1.68776	0.000802951		-1.69131	0.00131881		-1.6872	0.00164974		-1.68289	0.00141662		-1.68731	0.00110803		-1.69067	0.00104244		-1.6847	0.00164268		-1.69194	0.00141044		-1.69198	0.00193762
-1.68596	0.00450275		-1.68052	0.003481		-1.68381	0.0019002		-1.68341	0.00144528		-1.68278	0.000863762		-1.6887	0.00152911		-1.68311	0.00123294		-1.68307	0.000620748		-1.68381	0.00270768		-1.68282	0.00192761		-1.67851	0.000970744		-1.68075	0.00127757		-1.68473	0.00174559		-1.68032	0.00194863		-1.686	0.00152359		-1.68698	0.00138156
-1.67753	0.00456086		-1.67396	0.00397247		-1.67693	0.00281777		-1.67903	0.00140994		-1.67841	0.000531609		-1.68151	0.00155807		-1.67873	0.00144248		-1.67619	0.000457642		-1.67631	0.0021652		-1.67719	0.00205847		-1.67351	0.00195759		-1.67263	0.00117255		-1.6766	0.00160677		-1.67282	0.00230147		-1.67788	0.00188829		-1.67917	0.000879111
-1.6719	0.00489398		-1.66583	0.00293486		-1.67256	0.00219652		-1.67309	0.00154562		-1.67278	0.000570759		-1.6737	0.00172964		-1.67186	0.00124729		-1.66838	0.00143561		-1.67132	0.00238326		-1.66938	0.00144302		-1.6657	0.00251767		-1.66637	0.00189828		-1.67004	0.000932075		-1.66501	0.0015879		-1.67131	0.00196149		-1.67198	0.00111484
-1.66846	0.00427654		-1.6602	0.00395984		-1.66756	0.00208022		-1.66528	0.00254601		-1.66497	0.000896524		-1.66838	0.00182715		-1.66373	0.00118082		-1.66307	0.00135428		-1.66694	0.0018724		-1.66251	0.00156557		-1.6582	0.00177254		-1.66231	0.00222659		-1.66661	0.000855767		-1.66001	0.00147697		-1.66725	0.00268442		-1.66729	0.00194146
-1.66284	0.00472207		-1.65645	0.00505605		-1.65975	0.00203166		-1.65872	0.00190705		-1.6581	0.00101892		-1.66432	0.00179796		-1.65842	0.00136651		-1.65869	0.00132619		-1.65944	0.00160009		-1.65814	0.00202727		-1.65351	0.00261749		-1.65669	0.0030015		-1.66129	0.00110582		-1.65563	0.00104951		-1.66163	0.00163004		-1.6626	0.00145576
-1.65503	0.00493329		-1.65083	0.00472971		-1.65256	0.00238672		-1.65434	0.00235332		-1.65372	0.000264568		-1.65714	0.00100666		-1.65404	0.00163745		-1.65213	0.0014082		-1.65163	0.000779542		-1.65313	0.000969642		-1.64883	0.00274007		-1.64888	0.00269607		-1.65348	0.00148563		-1.64845	0.00110068		-1.6535	0.00130054		-1.6551	0.00121686
-1.64846	0.00524916		-1.64301	0.00394459		-1.64787	0.0026579		-1.64903	0.0016829		-1.64841	0.000548505		-1.64932	0.00139645		-1.64717	0.0020447		-1.64432	0.000618502		-1.64694	0.00147024		-1.64532	0.0017182		-1.64164	0.0024464		-1.642	0.00149149		-1.64692	0.00165721		-1.64032	0.00104409		-1.64663	0.00109519		-1.64729	0.00199531
-1.64409	0.00497898		-1.63708	0.00326708		-1.64318	0.00199328		-1.64122	0.00140743		-1.6406	0.00106507		-1.64433	0.000844591		-1.63904	0.00196663		-1.63838	0.000751278		-1.64319	0.00167121		-1.63782	0.0009867		-1.63383	0.00189576		-1.63793	0.000853161		-1.64254	0.00110625		-1.63564	0.000962253		-1.64319	0.00247281		-1.64292	0.00149829
-1.63877	0.00536296		-1.6327	0.00464541		-1.63537	0.00224681		-1.63403	0.00200853		-1.63341	0.000319584		-1.64058	0.000438878		-1.63405	0.00197296		-1.63432	0.00162904		-1.63663	0.00206141		-1.63313	0.000942034		-1.62914	0.00198228		-1.63231	0.00144184		-1.63754	0.000667585		-1.6322	0.00122717		-1.63819	0.00250779		-1.63916	0.00103294
-1.63128	0.00502346		-1.62708	0.0047515		-1.62787	0.00264792		-1.62966	0.00157253		-1.62935	0.000517392		-1.63432	0.000944748		-1.63061	0.00147624		-1.62807	0.00161219		-1.62881	0.00161162		-1.62845	0.0018394		-1.62477	0.0021553		-1.62419	0.00112085		-1.63004	0.000458709		-1.62563	0.00154732		-1.63069	0.00133897		-1.63229	0.00169103
-1.62409	0.00512243		-1.61927	0.00384982		-1.6235	0.00215008		-1.62466	0.00106994		-1.62497	0.00106816		-1.62651	0.000860289		-1.62436	0.000842359		-1.61963	0.00162882		-1.6235	0.00104501		-1.62095	0.00147197		-1.61726	0.00241162		-1.61763	0.00179807		-1.62254	0.00115151		-1.61782	0.0018111		-1.62381	0.00231864		-1.62479	0.00169284
-1.6194	0.00532934		-1.61208	0.00441057		-1.61943	0.00226811		-1.61684	0.00118418		-1.61779	0.00106755		-1.62089	0.0010511		-1.61686	0.00101117		-1.61401	0.00178698		-1.61944	0.00179145		-1.61344	0.00213635		-1.60945	0.0022753		-1.61387	0.00137137		-1.61754	0.00126253		-1.61251	0.00134035		-1.61913	0.00215432		-1.61948	0.00197381
-1.6144	0.00430085		-1.6077	0.00457504		-1.61256	0.00259264		-1.60966	0.00143343		-1.6106	0.00137435		-1.61651	0.00134361		-1.61092	0.000837506		-1.61057	0.00164342		-1.61319	0.00158941		-1.60907	0.000896021		-1.60477	0.00224503		-1.60887	0.000426237		-1.61286	0.00138173		-1.60813	0.000618881		-1.61444	0.00168467		-1.6151	0.00198965
-1.60721	0.0047657		-1.60302	0.00410906		-1.60506	0.00194511		-1.60559	0.00111919		-1.6056	0.000791026		-1.61057	0.0015479		-1.60654	0.000837506		-1.60463	0.00166724		-1.60506	0.00260303		-1.60501	0.00110791		-1.60102	0.00238715		-1.60137	0.00112565		-1.60598	0.00103123		-1.60188	0.00088447		-1.60725	0.00148882		-1.60854	0.00215004
-1.59971	0.00466604		-1.5952	0.0044598		-1.60006	0.0018645		-1.60122	0.00105238		-1.60091	0.000394792		-1.60245	0.00127595		-1.60061	0.00138656		-1.59682	0.0012397		-1.59882	0.0022942		-1.59813	0.00144773		-1.59445	0.00188331		-1.5945	0.00228562		-1.59817	0.00119031		-1.59376	0.000926631		-1.59944	0.000984417		-1.60041	0.00275542
-1.59471	0.00498691		-1.58771	0.00441688		-1.59568	0.00343364		-1.59403	0.00185871		-1.59404	0.000952775		-1.59589	0.00115678		-1.59279	0.0017898		-1.59088	0.00121723		-1.59475	0.00181473		-1.59063	0.00217159		-1.58664	0.00154155		-1.58981	0.00182552		-1.59286	0.000686769		-1.58751	0.00155115		-1.59444	0.0021243		-1.59448	0.00181636
-1.59034	0.00495312		-1.58302	0.00318974		-1.58912	0.00306208		-1.58684	0.00225161		-1.58622	0.00118788		-1.59182	0.00191426		-1.58623	0.00124412		-1.58651	0.000640968		-1.58881	0.00273053		-1.58532	0.00181404		-1.58133	0.00146921		-1.58512	0.00213164		-1.58879	0.000892628		-1.58345	0.0016641		-1.59006	0.00200619		-1.59042	0.00123428
-1.58284	0.00422274		-1.57864	0.00483297		-1.581	0.0022232		-1.58216	0.00213167		-1.58091	0.000680171		-1.58651	0.00130867		-1.58186	0.00121036		-1.58088	0.000591542		-1.581	0.00201869		-1.58095	0.00149688		-1.57695	0.00211301		-1.57794	0.00106708		-1.58192	0.00134013		-1.57782	0.00147742		-1.58319	0.00121935		-1.58448	0.0016442
-1.57534	0.00400946		-1.57083	0.00440425		-1.57537	0.00225909		-1.57747	0.00227009		-1.57654	0.000457019		-1.5787	0.00214796		-1.57654	0.0014429		-1.57338	0.000780485		-1.57413	0.00171542		-1.57469	0.00134807		-1.5707	0.00235516		-1.57012	0.000678136		-1.57348	0.00102326		-1.57001	0.00155408		-1.57506	0.000627703		-1.57635	0.00123044
-1.57065	0.00417533		-1.56302	0.00419163		-1.57131	0.00215219		-1.57059	0.00230771		-1.56997	0.00094		-1.57182	0.00207566		-1.56873	0.00159229		-1.56619	0.0011386		-1.57006	0.00197384		-1.56657	0.0013483		-1.56257	0.00221648		-1.56512	0.00166765		-1.56848	0.00112414		-1.56313	0.00186882		-1.56975	0.000705222		-1.56979	0.00169352
-1.5669	0.00457845		-1.55864	0.0040851		-1.56506	0.00241358		-1.56278	0.00123276		-1.56216	0.000713757		-1.56745	0.00219903		-1.56154	0.00214282		-1.56182	0.00141179		-1.56444	0.00155417		-1.56063	0.0012868		-1.55633	0.00154327		-1.56075	0.00185778		-1.56473	0.0021752		-1.55876	0.00144225		-1.56569	0.00211804		-1.56573	0.00148472
-1.56003	0.00465414		-1.55489	0.00489114		-1.55693	0.00314902		-1.55716	0.00103551		-1.55622	0.000218619		-1.56214	0.00175463		-1.55686	0.00150029		-1.55682	0.00121207		-1.55631	0.00253981		-1.55657	0.00107873		-1.55195	0.00167787		-1.55419	0.00118559		-1.55848	0.00182557		-1.55344	0.00128533		-1.55881	0.00127614		-1.56011	0.00188626
-1.55253	0.00472949		-1.54802	0.00388729		-1.55068	0.00337568		-1.55309	0.00159396		-1.55216	0.00109186		-1.55433	0.00146609		-1.55217	0.00119433		-1.54932	0.00138798		-1.54975	0.00322752		-1.55064	0.00107536		-1.54633	0.00166821		-1.54606	0.00126681		-1.55098	0.00161604		-1.54533	0.00157843		-1.55069	0.000488214		-1.55167	0.00181975
-1.54721	0.00548589		-1.54052	0.00444891		-1.54662	0.00196411		-1.54653	0.00132876		-1.54591	0.00122249		-1.54713	0.00176104		-1.54436	0.000948076		-1.54182	0.00100043		-1.546	0.0030086		-1.54251	0.00219606		-1.53852	0.0016446		-1.54013	0.0012778		-1.54504	0.0010308		-1.53845	0.00178337		-1.54538	0.00111656		-1.5451	0.0016062
-1.54284	0.00384928		-1.53552	0.00400079		-1.541	0.00227041		-1.53841	0.001238		-1.53747	0.001267		-1.54308	0.00219129		-1.53686	0.00070077		-1.53713	0.000942692		-1.541	0.0021054		-1.53594	0.00182863		-1.53164	0.0024758		-1.53606	0.00118445		-1.54098	0.00132547		-1.53439	0.000904762		-1.54163	0.00114356		-1.54167	0.00141911
-1.53628	0.00434395		-1.53083	0.00397617		-1.53256	0.00237136		-1.53247	0.000996968		-1.53185	0.00122394		-1.5387	0.00209932		-1.5328	0.000715963		-1.53275	0.000653325		-1.5335	0.00123018		-1.53188	0.00264093		-1.52758	0.00229248		-1.52981	0.00127688		-1.53504	0.00209889		-1.53001	0.000945795		-1.53569	0.00130356		-1.53667	0.00156616
-1.52846	0.00492691		-1.52458	0.00447875		-1.52631	0.00244352		-1.52841	0.00128064		-1.52841	0.00123774		-1.53151	0.00242831		-1.52873	0.000461905		-1.52525	0.000807669		-1.52663	0.00170474		-1.52626	0.00227552		-1.52195	0.00177447		-1.52137	0.00146472		-1.52723	0.000998467		-1.52282	0.00162871		-1.52788	0.00200727		-1.52886	0.00147069
-1.52221	0.00635386		-1.51677	0.00466392		-1.52256	0.00255119		-1.52216	0.00155634		-1.52247	0.000680583		-1.52432	0.00105021		-1.52154	0.000983104		-1.51744	0.000997286		-1.52194	0.00130557		-1.51782	0.00152674		-1.51383	0.00147243		-1.51575	0.00123089		-1.52035	0.000763724		-1.51563	0.00196035		-1.52194	0.00162162		-1.52198	0.00252897
-1.51815	0.00531692		-1.51051	0.00379035		-1.51756	0.00196027		-1.51403	0.00218366		-1.51466	0.000903529		-1.51933	0.000805899		-1.51404	0.00158934		-1.51276	0.00185393		-1.51725	0.0010873		-1.51126	0.00168183		-1.50695	0.00160553		-1.51231	0.00137892		-1.51629	0.00107585		-1.51064	0.00106867		-1.51756	0.00201979		-1.51729	0.00143924
-1.51221	0.00416895		-1.50645	0.0031172		-1.50975	0.00182439		-1.50809	0.00227009		-1.50872	0.000761973		-1.51495	0.000849013		-1.50905	0.00193055		-1.509	0.00158007		-1.51006	0.00120818		-1.50782	0.00121766		-1.5032	0.0019973		-1.50637	0.0014423		-1.51098	0.000771268		-1.50595	0.000934522		-1.51194	0.00190082		-1.51261	0.00149557
-1.5044	0.00451448		-1.50052	0.00389448		-1.50318	0.00181307		-1.50466	0.00246733		-1.50435	0.000460728		-1.50807	0.00163634		-1.50467	0.00157584		-1.50213	0.00144392		-1.50225	0.00176753		-1.50282	0.00179316		-1.49851	0.00148359		-1.49887	0.00179143		-1.50286	0.000807913		-1.49907	0.00139107		-1.50412	0.00158189		-1.50511	0.00192993
-1.49784	0.00597557		-1.4927	0.00333309		-1.4985	0.00181575		-1.49903	0.00131188		-1.49903	0.000265804		-1.49995	0.00151407		-1.49811	0.0012551		-1.49463	0.000699156		-1.49694	0.0023728		-1.49532	0.00124213		-1.49133	0.00215444		-1.49294	0.00161984		-1.49598	0.0011416		-1.49126	0.00102403		-1.49725	0.00083046		-1.4973	0.00208738
-1.49346	0.00571314		-1.48583	0.00421581		-1.4935	0.00234814		-1.49153	0.000815452		-1.49122	0.000115388		-1.49432	0.00132614		-1.49029	0.00183116		-1.48932	0.000914834		-1.49256	0.0017041		-1.48844	0.0010179		-1.48383	0.00213147		-1.48856	0.00138922		-1.49161	0.000555925		-1.48563	0.000666904		-1.49288	0.000835858		-1.49229	0.00209552
-1.48815	0.0053802		-1.48177	0.00460467		-1.48631	0.00194588		-1.48497	0.00160787		-1.48404	0.000428378		-1.49026	0.00114329		-1.48436	0.001169		-1.48494	0.00107322		-1.486	0.00190571		-1.48407	0.00117704		-1.47914	0.00140975		-1.48294	0.00175025		-1.48661	0		-1.48158	0.00120237		-1.48787	0.000635477		-1.48823	0.0018141
-1.48003	0.00459465		-1.47614	0.00397574		-1.47881	0.0021259		-1.48059	0.00168928		-1.47966	0.00077516		-1.48401	0.00109001		-1.48029	0.00113524		-1.47838	0.000592441		-1.47788	0.00233713		-1.47907	0.00182459		-1.47445	0.00153554		-1.47512	0.00135719		-1.47879	0.000633958		-1.47501	0.00239549		-1.48006	0.000790297		-1.48136	0.00228329
-1.47315	0.00491449		-1.46802	0.00392498		-1.47381	0.00243585		-1.47528	0.00108385		-1.47466	0.000776603		-1.47589	0.00069933		-1.47405	0.00170603		-1.47057	0.00195863		-1.47225	0.00258466		-1.47157	0.00151529		-1.46758	0.00198378		-1.46794	0.000884505		-1.47129	0.0006387		-1.46689	0.00199305		-1.47287	0.000750782		-1.47323	0.00187722
-1.4694	0.00490139		-1.46114	0.00512903		-1.46912	0.0023633		-1.46778	0.00125487		-1.46716	0.000497405		-1.46995	0.00128811		-1.46592	0.00137263		-1.46432	0.00174722		-1.46819	0.00236062		-1.46407	0.000792323		-1.45945	0.00199859		-1.46356	0.000874895		-1.46723	0.000554201		-1.46095	0.00109144		-1.46819	0.000763306		-1.46792	0.00120171
-1.46471	0.00501208		-1.4577	0.00563095		-1.46225	0.00233873		-1.46028	0.00204775		-1.45966	0.000341631		-1.46589	0.0015594		-1.45967	0.000577328		-1.46026	0.00141696		-1.46163	0.00215154		-1.45907	0.00137635		-1.45414	0.00184167		-1.45887	0.00192756		-1.46317	0.00121704		-1.45689	0.000998327		-1.4635	0.00132299		-1.46354	0.00156231
-1.45721	0.00477225		-1.4527	0.00488678		-1.45443	0.00275098		-1.45559	0.00160992		-1.45497	0.000276107		-1.45964	0.00112583		-1.45561	0.000970865		-1.45463	0.00146436		-1.4535	0.00217674		-1.4547	0.00202951		-1.45008	0.00135222		-1.45106	0.00111078		-1.45598	0.00146666		-1.45064	0.0021574		-1.45569	0.00196063		-1.45698	0.00177926
-1.45034	0.00558642		-1.4452	0.00418683		-1.44912	0.00157144		-1.45122	0.0010843		-1.45028	0.000834297		-1.45151	0.00190143		-1.44967	0.000996397		-1.4465	0.00205613		-1.44788	0.00173336		-1.44782	0.000885471		-1.44351	0.00198957		-1.44356	0.00110941		-1.44879	0.0011472		-1.4422	0.00273367		-1.44819	0.00195329		-1.44886	0.00172791
-1.44565	0.00594936		-1.43864	0.00480879		-1.44506	0.00141195		-1.44372	0.000688664		-1.44279	0.000622065		-1.44557	0.00134604		-1.44154	0.000224727		-1.43994	0.00110468		-1.44444	0.00241978		-1.4397	0.00146905		-1.43539	0.00123393		-1.43888	0.000961836		-1.44379	0.00203358		-1.43657	0.00128736		-1.44381	0.00134459		-1.44354	0.00174193
-1.44096	0.00554728		-1.43395	0.00520876		-1.43818	0.0019238		-1.4359	0.00189634		-1.43497	0.00112606		-1.44182	0.000812753		-1.43529	0.00127092		-1.43588	0.000817779		-1.4385	0.00195291		-1.43438	0.0020257		-1.42945	0.0016139		-1.43418	0.00157408		-1.4391	0.0019521		-1.43314	0.00109302		-1.43975	0.00155727		-1.44011	0.00146164
-1.43378	0.00460517		-1.42895	0.0055351		-1.43006	0.00207638		-1.43122	0.00187764		-1.4306	0.00134324		-1.43651	0.00110615		-1.43154	0.00202318		-1.43026	0.00145246		-1.43069	0.00217375		-1.43032	0.00203557		-1.4257	0.0019065		-1.42668	0.00167566		-1.43223	0.00178784		-1.42751	0.000727777		-1.43288	0.000802389		-1.43386	0.00159466
-1.42596	0.00555228		-1.42177	0.00543707		-1.42475	0.00203262		-1.42684	0.00216633		-1.42653	0.0013622		-1.42901	0.00144023		-1.42654	0.00184846		-1.42213	0.000707244		-1.42475	0.0018583		-1.42345	0.00224275		-1.41914	0.00163751		-1.41887	0.000730757		-1.42442	0.00185617		-1.4197	0.00114645		-1.42537	0.00102372		-1.42604	0.00121257
-1.42065	0.00618058		-1.41427	0.0053715		-1.42131	0.00232185		-1.41965	0.00320959		-1.41997	0.000687177		-1.42245	0.0013739		-1.41873	0.00100779		-1.41557	0.000858443		-1.42038	0.00291271		-1.41532	0.00232198		-1.4107	0.001112		-1.4145	0.00107966		-1.41879	0.0013966		-1.41345	0.000873423		-1.42038	0.00171641		-1.4201	0.00149241
-1.41659	0.00469414		-1.40927	0.00485519		-1.41506	0.00161596		-1.41153	0.00241238		-1.41216	0.000915275		-1.41808	0.0008143		-1.41217	0.00110275		-1.41182	0.0012707		-1.41475	0.00290737		-1.41001	0.00199091		-1.40508	0.00196811		-1.41075	0.0019088		-1.41442	0.00205902		-1.40907	0.00134733		-1.41569	0.0011686		-1.41604	0.00105285
-1.41003	0.00466466		-1.40489	0.00418596		-1.40725	0.00127934		-1.40684	0.00194126		-1.40685	0.000167312		-1.41276	0.00154016		-1.4078	0.00166552		-1.40682	0.000547508		-1.40725	0.00245331		-1.40657	0.00191684		-1.40164	0.00162399		-1.40387	0.0021806		-1.40817	0.00113211		-1.40376	0.00103891		-1.40913	0.000697016		-1.41011	0.00204869
-1.4019	0.00519364		-1.39802	0.00549785		-1.40162	0.00185798		-1.40341	0.0014202		-1.40279	0.000134139		-1.40526	0.00230184		-1.40279	0.000451354		-1.39932	0.00101796		-1.40006	0.00209024		-1.40032	0.00170383		-1.39601	0.0017998		-1.39637	0.00134186		-1.40004	0.000758119		-1.39595	0.00109505		-1.401	0.000341599		-1.40229	0.00211634
-1.39628	0.00589005		-1.38989	0.00508132		-1.39725	0.00171058		-1.39684	0.00178437		-1.39622	0.000661833		-1.39776	0.00140131		-1.39529	0.000948076		-1.39244	0.000982683		-1.39538	0.00199584		-1.39251	0.000643959		-1.3882	0.00235087		-1.39106	0.00118742		-1.39411	0.000697547		-1.38876	0.00143414		-1.39538	0.000921797		-1.39542	0.00161321
-1.39221	0.00586832		-1.38427	0.00482535		-1.39131	0.00173726		-1.38903	0.00157298		-1.38841	0.000144853		-1.39307	0.00114108		-1.38779	0.00155853		-1.38776	0.000728587		-1.39069	0.00177223		-1.38688	0.00150654		-1.38227	0.00141168		-1.38668	0.0021424		-1.39004	0.0010086		-1.38407	0.00150403		-1.39131	0.00137978		-1.39104	0.00162678
-1.38565	0.00517692		-1.3802	0.00568585		-1.3835	0.00132866		-1.38372	0.0015178		-1.38216	0		-1.38839	0.0010166		-1.38311	0.00102193		-1.38307	0.00122779		-1.38288	0.0019354		-1.38251	0.00179384		-1.37789	0.00181569		-1.38044	0.00152146		-1.38379	0.00117436		-1.37939	0.00191188		-1.38538	0.00128672		-1.38604	0.00207516
-1.37753	0.00601057		-1.37333	0.00511487		-1.37693	0.00169676		-1.37934	0.00203065		-1.3781	3.89432e-05		-1.3812	0.000942537		-1.37842	0.00128253		-1.37588	0.00126037		-1.37538	0.00184484		-1.37657	0.0018275		-1.37226	0.00177769		-1.37231	0.00135078		-1.37535	0.0014132		-1.37189	0.00158587		-1.37725	0.00148839		-1.37823	0.00181048
-1.3719	0.00542072		-1.36521	0.0047125		-1.37256	0.00184243		-1.37309	0.00227009		-1.37247	0.000686147		-1.37339	0.000737359		-1.37123	0.000904818		-1.36807	0.00100178		-1.37069	0.00250692		-1.36876	0.00114629		-1.36476	0.00162807		-1.36637	0.00053171		-1.36942	0.00165571		-1.36439	0.00108265		-1.371	0.00202282		-1.37104	0.00160801
-1.36846	0.00462966		-1.35989	0.00431253		-1.36725	0.00154342		-1.36528	0.00180854		-1.36435	0.00102654		-1.3687	0.00158438		-1.36342	0.00118167		-1.36307	0.000998859		-1.366	0.00360768		-1.3622	0.000973906		-1.35758	0.0013666		-1.36231	0.00101789		-1.36567	0.00130305		-1.35938	0.00160819		-1.36662	0.00128456		-1.36635	0.00200616
-1.36253	0.00481139		-1.35614	0.0053447		-1.35975	0.00191402		-1.35872	0.00224956		-1.35779	0.00096143		-1.36432	0.0021515		-1.35811	0.00133317		-1.35869	0.00105031		-1.3585	0.00313782		-1.35782	0.000767633		-1.35289	0.0013769		-1.35637	0.0015528		-1.36035	0.002117		-1.35501	0.00185957		-1.361	0.000908194		-1.36167	0.00215185
-1.35471	0.00455603		-1.35051	0.00634637		-1.35256	0.00284214		-1.35466	0.00220167		-1.35372	0.000785257		-1.35714	0.000988967		-1.35404	0.00111604		-1.35182	0.00184135		-1.351	0.00220984		-1.35251	0.00156534		-1.34789	0.0015598		-1.34825	0.00144481		-1.35254	0.00124463		-1.34751	0.000956842		-1.35288	0.00119732		-1.35386	0.00257738
-1.34878	0.00477328		-1.3427	0.00585294		-1.34818	0.00312868		-1.34903	0.00142271		-1.3481	0.00127463		-1.34901	0.00143116		-1.34686	0.00198879		-1.34401	0.00193885		-1.34663	0.0024578		-1.34501	0.00101094		-1.34039	0.0014252		-1.34169	0.00118811		-1.34598	0.000478324		-1.3397	0.00112233		-1.34631	0.00139252		-1.34636	0.00213149
-1.34471	0.00440689		-1.33677	0.00559305		-1.34318	0.00223414		-1.34091	0.00171847		-1.33997	0.00129276		-1.34432	0.00159654		-1.33873	0.00116563		-1.33869	0.00096089		-1.34256	0.00318459		-1.33782	0.000485045		-1.33289	0.00147651		-1.33763	0.000852016		-1.3416	0.000683536		-1.33501	0.0011584		-1.34288	0.00137136		-1.34229	0.00137115
-1.33909	0.0038967		-1.33239	0.00534426		-1.33537	0.00196795		-1.33403	0.00220897		-1.33341	0.000819873		-1.34089	0.00144841		-1.33373	0.000526052		-1.33463	0.000416303		-1.33569	0.00254088		-1.33313	0.00151282		-1.3282	0.00167444		-1.332	0.00143841		-1.3366	0.00156		-1.33126	0.00186589		-1.33756	0.00119667		-1.33823	0.00109991
-1.33128	0.00460603		-1.32676	0.00532923		-1.32787	0.00321696		-1.32997	0.00220738		-1.32966	0.0017436		-1.33432	0.000844812		-1.32998	0.000642953		-1.32776	0.000735327		-1.32819	0.002634		-1.32845	0.00163133		-1.32383	0.00188696		-1.32356	0.00128077		-1.32879	0.00151926		-1.3247	0.00184424		-1.33006	0.00189801		-1.33104	0
-1.32409	0.00557435		-1.31895	0.00486216		-1.32381	0.00214067		-1.32466	0.00142773		-1.32497	0.00117758		-1.32651	0.00150965		-1.32373	0.00158723		-1.31963	0.00125722		-1.32319	0.00190251		-1.32063	0.00122013		-1.31602	0.00200525		-1.317	0.000509974		-1.32129	0.00114979		-1.3172	0.00130427		-1.32319	0.000798718		-1.32354	0.000726409
-1.31971	0.00516606		-1.31177	0.00470052		-1.31975	0.00210632		-1.31684	0.00142043		-1.31747	0.000612381		-1.3212	0.00138584		-1.31623	0.00135765		-1.314	0.00168543		-1.3185	0.000971758		-1.31313	0.00118063		-1.3082	0.00186549		-1.31356	0.00165507		-1.31661	0.00155159		-1.31188	0.00144947		-1.31881	0.000718177		-1.31854	0.00196137
-1.31503	0.00524951		-1.30739	0.00693826		-1.31256	0.00164878		-1.30966	0.000969375		-1.31029	0.00117222		-1.31682	0.00137965		-1.31061	0.00128844		-1.31057	0.0016578		-1.31225	0.00177437		-1.30907	0.00116492		-1.30383	0.00285577		-1.30856	0.00175391		-1.31192	0.00149641		-1.30751	0.000717406		-1.31381	0.00054889		-1.31417	0.00205842
-1.30721	0.00490242		-1.30271	0.00626685		-1.30537	0.00175779		-1.3059	0.00184047		-1.30591	0.0012295		-1.31089	0.00106348		-1.30623	0.00101539		-1.30463	0.00112782		-1.30413	0.00230958		-1.3047	0.00108748		-1.30008	0.00228088		-1.30106	0.00117118		-1.30473	0.00113082		-1.30126	0.00137371		-1.30631	0.00149142		-1.30729	0.00177315
-1.29971	0.00454224		-1.29489	0.00493667		-1.30037	0.00224815		-1.30153	0.0023369		-1.30091	0.00173721		-1.30276	0.00130845		-1.3003	0.000480895		-1.29713	0.00080385		-1.29819	0.00238796		-1.29782	0.0012556		-1.2932	0.00152588		-1.29418	0.000809919		-1.29692	0.000898663		-1.29314	0.00203724		-1.29881	0.002009		-1.29948	0.00183831
-1.29534	0.0053933		-1.28739	0.00554839		-1.296	0.00339065		-1.29403	0.00201833		-1.29372	0.00106755		-1.29651	0.00198545		-1.29217	0		-1.29119	0.000938648		-1.29413	0.00247339		-1.29032	0.00135593		-1.2857	0.000985986		-1.28981	0.00143726		-1.29192	0.00117738		-1.28689	0.00213553		-1.29381	0.000959585		-1.29355	0.00244753
-1.29065	0.00501398		-1.28302	0.00522053		-1.28912	0.0039547		-1.28715	0.00175176		-1.28591	4.01799e-05		-1.29214	0.00148334		-1.28561	0.00067165		-1.28682	0.00152547		-1.28819	0.00254558		-1.28532	0.00156714		-1.28039	0.00136467		-1.28481	0.00121694		-1.28754	0.00162229		-1.28282	0.00214861		-1.28944	0.0015875		-1.28948	0.00202381
-1.28284	0.00431551		-1.27833	0.00535363		-1.281	0.00300009		-1.28247	0.00190204		-1.28091	0.00156536		-1.28682	0.00127396		-1.28154	0.00136588		-1.28119	0.00127317		-1.28006	0.00234247		-1.28095	0.00148005		-1.27601	0.00221262		-1.27762	0.000296284		-1.28036	0.00139035		-1.27689	0.00205482		-1.28225	0.00157822		-1.28323	0.00132907
-1.27534	0.00349151		-1.27052	0.00554251		-1.27537	0.00181614		-1.27778	0.00148337		-1.27653	0.00166035		-1.2787	0.00170864		-1.27623	0.0013452		-1.27338	0.00134574		-1.2735	0.00192493		-1.27438	0.0010464		-1.26945	0.00122706		-1.26981	0.00142514		-1.27254	0.00106615		-1.26907	0.00166906		-1.27444	0.000792673		-1.2751	0.00185618
-1.27096	0.00425792		-1.2627	0.00492229		-1.27131	0.0012778		-1.27059	0.0015552		-1.26997	0.000390877		-1.27182	0.00153065		-1.26842	0.00127493		-1.26651	0.00222643		-1.26944	0.00205244		-1.26626	0.00183177		-1.26164	0.00128717		-1.26481	0.00167246		-1.26754	0.0010959		-1.2622	0.00126121		-1.26912	0.00102372		-1.26886	0.00214439
-1.26721	0.00540313		-1.25864	0.00560677		-1.26506	0.00202782		-1.26278	0.0013454		-1.26185	0.00132902		-1.26776	0.00146388		-1.26123	0.00103522		-1.26213	0.00164454		-1.26381	0.00223077		-1.26064	0.00225733		-1.25539	0.00128588		-1.26043	0.00112794		-1.26411	0.0011998		-1.25813	0.0016641		-1.26506	0.000724655		-1.26479	0.00201974
-1.26003	0.00480363		-1.25458	0.00526105		-1.25693	0.00120449		-1.25747	0.00152259		-1.25654	0.00093011		-1.26245	0.00108647		-1.25686	0.00117048		-1.25713	0.00130148		-1.25538	0.00248215		-1.25657	0.00212423		-1.25133	0.00139601		-1.25356	0.00167475		-1.25754	0.00141277		-1.25251	0.00162961		-1.25819	0.00131025		-1.25885	0.00207471
-1.25253	0.0045031		-1.2477	0.00540744		-1.251	0.0018075		-1.25309	0.00144802		-1.25247	0.00106095		-1.25432	0.00143824		-1.25186	0.0016269		-1.24932	0.000672196		-1.24881	0.00188564		-1.25032	0.00231861		-1.2457	0.00188761		-1.24543	0.00222476		-1.24973	0.00143972		-1.24439	0.00135455		-1.24975	0.00137136		-1.25073	0.00272194
-1.24753	0.00416188		-1.24021	0.00609323		-1.24693	0.00238077		-1.24653	0.00194536		-1.2456	0.0010354		-1.24714	0.00166707		-1.24404	0.000782009		-1.24213	0.0019229		-1.24538	0.00237493		-1.2422	0.00229437		-1.23758	0.00187215		-1.24012	0.00160931		-1.24442	0.00130822		-1.23782	0.00159511		-1.24475	0.00188592		-1.24448	0.00219687
-1.24315	0.00349151		-1.23489	0.00584227		-1.24068	0.00211784		-1.23841	0.00174424		-1.23747	0.000424875		-1.24339	0.00170289		-1.23654	0.000518878		-1.23744	0.00209904		-1.24038	0.0019685		-1.23626	0.00199293		-1.23101	0.00163859		-1.23606	0.00038208		-1.24004	0.00135802		-1.23407	0.00173805		-1.241	0.00194033		-1.24104	0.00167339
-1.23659	0.00356099		-1.23052	0.00472383		-1.23256	0.00194914		-1.23247	0.000851937		-1.23185	0.0012227		-1.23901	0.00129187		-1.23248	0.00125172		-1.23275	0.00147425		-1.23288	0.00239885		-1.23219	0.00152808		-1.22695	0.00188503		-1.22918	0.00130411		-1.23379	0.00154038		-1.22939	0.0018589		-1.23475	0.00103343		-1.23573	0.00227175
-1.22846	0.00399705		-1.22395	0.00595293		-1.22631	0.0017791		-1.2284	0.00192712		-1.22841	0.000796384		-1.23151	0.00158062		-1.22842	0.00165391		-1.22494	0.000678262		-1.22631	0.00253832		-1.22595	0.00192492		-1.22133	0.000973964		-1.22106	0.00183032		-1.22567	0.000942422		-1.22189	0.00142106		-1.22694	0.000886169		-1.22792	0.00218782
-1.22253	0.00406912		-1.21614	0.00612808		-1.22287	0.00219959		-1.22216	0.00133058		-1.22247	0.000457431		-1.22464	0.00107453		-1.22123	0.001418		-1.21744	0.000740944		-1.22163	0.00199306		-1.21782	0.00101992		-1.21289	0.00113819		-1.21575	0.00215521		-1.21942	0.00161712		-1.2147	0.00265769		-1.22131	0.00156937		-1.22136	0.00198083
-1.21846	0.00388532		-1.2102	0.00558477		-1.21756	0.00286843		-1.21403	0.00156386		-1.21466	0.00159689		-1.21964	0.000868027		-1.21373	0.00103227		-1.21307	0.000390243		-1.21663	0.00198025		-1.21157	0.00125784		-1.20633	0.00128051		-1.21231	0.00109705		-1.21504	0.00146235		-1.21032	0.00105356		-1.21694	0.00180041		-1.21698	0.00100806
-1.21253	0.00392894		-1.20614	0.00531268		-1.21006	0.00267632		-1.2084	0.00195791		-1.20872	0.000326383		-1.21495	0.00120785		-1.20873	0.000908194		-1.209	0.000750604		-1.20913	0.00262973		-1.20782	0.00205847		-1.20258	0.00243394		-1.20606	0.00128443		-1.20973	0.00127956		-1.20564	0.00121026		-1.211	0.00170454		-1.21198	0.0012879
-1.2044	0.00460172		-1.2002	0.00474474		-1.2035	0.00206506		-1.20465	0.00251021		-1.20435	0.000710048		-1.20807	0.000673904		-1.20436	0.00137706		-1.20213	0.00184584		-1.20163	0.0026105		-1.20282	0.00144997		-1.19789	0.00260869		-1.19856	0.00162075		-1.20192	0.000984025		-1.19814	0.00247327		-1.20319	0.00198179		-1.20448	0.00183039
-1.19784	0.00526985		-1.19208	0.00422605		-1.19881	0.00180098		-1.19903	0.00237909		-1.19904	0.00107476		-1.20026	0.000342258		-1.19748	0.00198224		-1.19463	0.00262813		-1.19663	0.00296717		-1.19501	0.000410078		-1.19039	0.00184102		-1.19262	0.00190628		-1.19504	0.00100148		-1.19032	0.00162555		-1.19631	0.00213402		-1.19698	0.00200006
-1.19378	0.00496156		-1.18552	0.00423062		-1.1935	0.00165896		-1.19122	0.00209108		-1.19122	0.00162965		-1.19495	0.00043932		-1.18967	0.000988379		-1.18963	0.00167487		-1.19225	0.00243516		-1.18845	0.00175186		-1.1832	0.00181913		-1.18825	0.00145305		-1.19067	0.0011666		-1.18533	0.00170288		-1.19194	0.00171792		-1.19198	0.00207064
-1.18815	0.00392084		-1.18146	0.00328864		-1.18631	0.00117474		-1.18497	0.00134768		-1.18404	0.0012874		-1.19058	0.00163899		-1.18404	0.00180099		-1.18525	0.00144504		-1.18538	0.00217823		-1.18376	0.00222142		-1.17851	0.00204603		-1.18231	0.00104145		-1.18535	0.00123752		-1.18095	0.00226247		-1.18663	0.00104941		-1.18729	0.00205752
-1.18003	0.00506105		-1.17583	0.00574315		-1.17881	0.0015557		-1.1809	0.00204137		-1.17966	0.000643494		-1.18401	0.00102876		-1.17998	0.00136187		-1.17838	0.00140999		-1.17725	0.00242875		-1.17876	0.00214735		-1.17383	0.00171029		-1.17449	0.000552987		-1.17754	0.00103059		-1.17439	0.00192135		-1.17882	0.0018911		-1.18042	0.00135916
-1.17346	0.00521709		-1.16739	0.00536191		-1.17381	0.0023658		-1.17559	0.00168404		-1.17466	0.00123218		-1.17589	0.000656437		-1.17373	0.00160179		-1.17057	0.000813061		-1.17194	0.00248813		-1.17157	0.00173772		-1.16664	0.00133547		-1.16793	0.001281		-1.17036	0.00155569		-1.16626	0.00120372		-1.17162	0.00145622		-1.1726	0.000927749
-1.17002	0.00543003		-1.16083	0.00580349		-1.16943	0.00215488		-1.16747	0.00165302		-1.16716	0.000393761		-1.17026	0.00162307		-1.16561	0.0012973		-1.16463	0.000741393		-1.16756	0.00233585		-1.16407	0.00151821		-1.15883	0.00192303		-1.16356	0.00173538		-1.16629	0.00163997		-1.16064	0.00250822		-1.16725	0.001155		-1.16729	0.000909199
-1.16502	0.00461172		-1.15739	0.00525103		-1.16225	0.00224623		-1.16028	0.00216473		-1.15966	0.000244581		-1.1662	0.00153795		-1.15936	0.001054		-1.16057	0.00114399		-1.16069	0.00289819		-1.15907	0.0013346		-1.15383	0.00178778		-1.15856	0.00147844		-1.16192	0.000961176		-1.15657	0.00207895		-1.16225	0.00102307		-1.16291	0.00203399
-1.15721	0.00414964		-1.15239	0.00402301		-1.15443	0.00239113		-1.15591	0.00194696		-1.15497	0.000107558		-1.15964	0.00237458		-1.15561	0.00110211		-1.15432	0.00181933		-1.15256	0.00198879		-1.15469	0.00153504		-1.14945	0.00139386		-1.15074	0.00105495		-1.15473	0.00161173		-1.15001	0.00105244		-1.15444	0.00104466		-1.15604	0.00184079
-1.15034	0.00444586		-1.14458	0.00432996		-1.14912	0.00241013		-1.15122	0.00235788		-1.15029	0.000731684		-1.15151	0.000976365		-1.14936	0.00093647		-1.14619	0.00114175		-1.14725	0.00215944		-1.14751	0.00144661		-1.14258	0.00134878		-1.14356	0.000765533		-1.14754	0.00159276		-1.14157	0.00108535		-1.14694	0.00162227		-1.14792	0.000849701
-1.14596	0.00455345		-1.13802	0.00545994		-1.14506	0.00215372		-1.14372	0.00338814		-1.14279	0.00120045		-1.14589	0.00169648		-1.14092	0.0016978		-1.13994	0.00067332		-1.14382	0.00102387		-1.1397	0.00155255		-1.13445	0.00219115		-1.13887	0.00159215		-1.14254	0.00103209		-1.13595	0.00158632		-1.14288	0.000937992		-1.14292	0.00220683
-1.14096	0.00486863		-1.13333	0.00575796		-1.13787	0.00154073		-1.13622	0.00206098		-1.13497	0.000838624		-1.14214	0.00159455		-1.13467	0.00122598		-1.13588	0.00144594		-1.13788	0.000762456		-1.13439	0.00171326		-1.12914	0.00263681		-1.13388	0.00112107		-1.13785	0.00146709		-1.13251	0.00189926		-1.13881	0.00136013		-1.13916	0.0029959
-1.13377	0.00549572		-1.12833	0.00466066		-1.12975	0.0021353		-1.13122	0.00147242		-1.1306	0.000221298		-1.13651	0.00125871		-1.13123	0.000839616		-1.13025	0.00154097		-1.13007	0.00255049		-1.13032	0.00152876		-1.12507	0.00209949		-1.12606	0.00121694		-1.13098	0.00170205		-1.12657	0.00168755		-1.13163	0.00107554		-1.13292	0.0020496
-1.12596	0.00493812		-1.12114	0.00351521		-1.12475	0.00178102		-1.12684	0.00128361		-1.12654	0.000920426		-1.12901	0.00179575		-1.12592	0.000416748		-1.12213	0.00141314		-1.12413	0.00303957		-1.12313	0.00149711		-1.1182	0.00187923		-1.11856	0.000489155		-1.12285	0.00191653		-1.11907	0.00212043		-1.12413	0.00178832		-1.12542	0.00313209
-1.12096	0.00484691		-1.11364	0.00291634		-1.12131	0.00218923		-1.11934	0.000923084		-1.11966	0.00123836		-1.12276	0.0018738		-1.11842	0.000309765		-1.11557	0.00164994		-1.12006	0.0031754		-1.11501	0.00071758		-1.11008	0.00136703		-1.1145	0.00133545		-1.11754	0.000997821		-1.11314	0.00174797		-1.11944	0.00160089		-1.11948	0.00184871
-1.1169	0.00459		-1.10864	0.00462863		-1.11506	0.00277823		-1.11153	0.000943607		-1.11216	0.00118932		-1.11839	0.00121515		-1.11186	0.000559814		-1.11182	0.00129744		-1.11413	0.00248663		-1.11001	0.000946972		-1.10445	0.00138356		-1.11044	0.000998671		-1.11348	0.00188226		-1.10876	0.00219167		-1.11506	0.00114334		-1.11541	0.00150779
-1.11003	0.00451741		-1.10426	0.00535842		-1.10725	0.00208559		-1.10684	0.00136023		-1.10716	0.00133665		-1.11276	0.00113268		-1.10748	0.00137896		-1.10682	0.00224328		-1.10631	0.00163981		-1.10657	0.00151664		-1.10102	0.00187709		-1.10325	0.00079459		-1.10692	0.0021627		-1.10314	0.00230711		-1.10788	0.00093173		-1.10948	0.00144784
-1.1019	0.00504484		-1.09708	0.00446764		-1.10162	0.00233221		-1.10309	0.00144049		-1.10278	0.000860259		-1.10526	0.00102766		-1.10217	0.00117301		-1.09932	0.00215566		-1.09944	0.00262887		-1.10032	0.000899836		-1.09508	0.001791		-1.09574	0.00164889		-1.09879	0.00153801		-1.09532	0.00165125		-1.09975	0.00247281		-1.10135	0.0011119
-1.09659	0.00532244		-1.08927	0.00433061		-1.09725	0.00188619		-1.09622	0.00203521		-1.09622	0.000869943		-1.09807	0.00131221		-1.09467	0.00143193		-1.09244	0.0012552		-1.09538	0.00254088		-1.09251	0.00125515		-1.08758	0.00226714		-1.09075	0.00200558		-1.09286	0.00135565		-1.08814	0.00121026		-1.09444	0.00202066		-1.09479	0.00107909
-1.09253	0.00541589		-1.08396	0.00369907		-1.09131	0.0017933		-1.08872	0.0013454		-1.08841	0.00054459		-1.09339	0.00202989		-1.08717	0.00127662		-1.08775	0.000673994		-1.09006	0.00202361		-1.08688	0.00209865		-1.08164	0.00159715		-1.08638	0.00230712		-1.08879	0.00164859		-1.08376	0.00151282		-1.09038	0.00236053		-1.09073	0.00186251
-1.08565	0.00502726		-1.07989	0.00527826		-1.08318	0.00220247		-1.08372	0.00144141		-1.08247	0.000923517		-1.0887	0.00234562		-1.08248	0.000800789		-1.08276	0.00148503		-1.08225	0.00227519		-1.08251	0.00189753		-1.07727	0.00157333		-1.07981	0.00158758		-1.08254	0.00218555		-1.07907	0.00153785		-1.08381	0.00185526		-1.08542	0.00203897
-1.07721	0.00556176		-1.0727	0.00506237		-1.07693	0.00273889		-1.07903	0.00196406		-1.07841	0.000627216		-1.0812	0.00190276		-1.07811	0.00115107		-1.07557	0.00163039		-1.07506	0.0018803		-1.07657	0.00188474		-1.07164	0.00177963		-1.07169	0.00120344		-1.07411	0.00230669		-1.07126	0.000771741		-1.07569	0.00174664		-1.07729	0.00217244
-1.07221	0.00495087		-1.06458	0.00456763		-1.07256	0.00240226		-1.07278	0.00101658		-1.07216	0.000415809		-1.0737	0.00168763		-1.07061	0.00172861		-1.06807	0.0012543		-1.07038	0.00223013		-1.06844	0.000954379		-1.06383	0.00160317		-1.06606	0.00118033		-1.06817	0.00196072		-1.06376	0.00137867		-1.06975	0.000909274		-1.0701	0.00146594
-1.06846	0.00376945		-1.05958	0.00432081		-1.06725	0.00226062		-1.06497	0.00150184		-1.06435	0.00100326		-1.0687	0.00111742		-1.06279	0.00159314		-1.06307	0.00177103		-1.06569	0.00228587		-1.0622	0.000803546		-1.05664	0.00180667		-1.062	0.00143955		-1.06473	0.00150568		-1.05908	0.00181809		-1.06569	0.00110534		-1.06573	0.00112321
-1.06252	0.00387083		-1.05583	0.00639364		-1.05943	0.00296151		-1.05872	0.00302169		-1.0581	0.00127236		-1.06432	0.00149528		-1.0578	0.00129097		-1.05838	0.00158523		-1.05788	0.00267927		-1.05782	0.00172022		-1.05226	0.000763157		-1.05575	0.00131989		-1.0591	0.00189713		-1.05438	0.00246763		-1.05944	0.00151625		-1.06073	0.00175732
-1.05471	0.00453672		-1.04958	0.00597385		-1.05256	0.00287342		-1.05466	0.00201948		-1.05372	5.33668e-05		-1.05682	0.00186827		-1.05342	0.00146273		-1.05151	0.00113613		-1.05038	0.00278649		-1.05251	0.00239246		-1.04726	0.00187065		-1.04763	0.00166605		-1.05129	0.00224159		-1.04688	0.00255173		-1.05131	0.000976859		-1.05291	0.00219099
-1.04878	0.00501312		-1.04208	0.00417834		-1.04818	0.00157432		-1.04872	0.00191732		-1.0481	0.000588891		-1.04932	0.00132172		-1.04623	0.000638521		-1.04369	0.00101279		-1.04632	0.00180234		-1.04469	0.00243174		-1.03945	0.00314343		-1.04137	0.00171684		-1.04504	0.00163156		-1.03907	0.00187829		-1.04506	0.00075834		-1.04573	0.00247106
-1.04471	0.00517002		-1.03614	0.00230658		-1.04287	0.00157297		-1.0409	0.00186259		-1.03997	0.00170136		-1.04464	0.0017208		-1.03811	0.00107257		-1.03838	0.000130755		-1.04225	0.00208746		-1.03782	0.00166074		-1.03226	0.00210893		-1.03731	0.00105999		-1.04067	0.0014533		-1.0347	0.00178495		-1.04163	0.0006385		-1.04167	0.00275859
-1.03909	0.00517157		-1.03177	0.00482317		-1.03506	0.00214067		-1.03403	0.0015365		-1.03341	0.000945976		-1.04089	0.000933251		-1.03342	0.00112976		-1.03432	0		-1.03506	0.00165412		-1.03345	0.000661466		-1.02758	0.000837862		-1.03138	0.00167978		-1.03536	0.00105257		-1.03095	0.00145307		-1.03631	0.000788138		-1.03729	0.00234211
-1.03127	0.00523451		-1.02583	0.00450555		-1.02787	0.00186508		-1.02997	0.00211137		-1.02966	0.00104467		-1.03401	0.00122178		-1.02998	0.000700348		-1.02744	0.001206		-1.02756	0.00114582		-1.02844	0.000775938		-1.02289	0.00106606		-1.02294	0.00106708		-1.02754	0.00101269		-1.02407	0.00167876		-1.0285	0.000359737		-1.0301	0.00152792
-1.02409	0.0056009		-1.01801	0.0052092		-1.02381	0.00226984		-1.02434	0.00195722		-1.02466	0.000478654		-1.02651	0.00138429		-1.02342	0.000630503		-1.01932	0.00164387		-1.02257	0.00134145		-1.02032	0.00160103		-1.01508	0.00169827		-1.01669	0.00108836		-1.02035	0.00131749		-1.01657	0.0018005		-1.02194	0.000942958		-1.02292	0.00144739
-1.01971	0.00487415		-1.01145	0.00484147		-1.01943	0.00243431		-1.01622	0.00188493		-1.01716	0.000834297		-1.0212	0.000880187		-1.01561	0.00180478		-1.01432	0.000780934		-1.01819	0.00210135		-1.01313	0.00159744		-1.00758	0.000946271		-1.01325	0.00101011		-1.01567	0.00154685		-1.01126	0.00192203		-1.01788	0.00153676		-1.01792	0.00132161
-1.01471	0.00530296		-1.00708	0.00398837		-1.01225	0.00254927		-1.00934	0.00139329		-1.01029	0.00169105		-1.01682	0.000851887		-1.01029	0.000839194		-1.01057	0.00143224		-1.01131	0.00205521		-1.00907	0.00078918		-1.0032	0.00103643		-1.00825	0.00190949		-1.01098	0.000981869		-1.00688	0.00218919		-1.01256	0.00138324		-1.01354	0.0022946
-1.0069	0.00490898		-1.00177	0.00425611		-1.00506	0.00247231		-1.00559	0.00199097		-1.00591	0.00128225		-1.01026	0.00210396		-1.00592	0.000913892		-1.00432	0.00148166		-1.0035	0.002206		-1.00469	0.00167937		-0.99914	0.00120924		-1.00044	0.00131738		-1.00348	0.00118751		-1.00063	0.00154664		-1.00475	0.00160499		-1.00666	0.00216
-0.999713	0.0049945		-0.993955	0.00479136		-1.00006	0.00299606		-1.00091	0.00223018		-1.00091	0.00138569		-1.00245	0.00192951		-0.999669	0.000530695		-0.996819	0.00205119		-0.997876	0.00187069		-0.997506	0.00204523		-0.992262	0.00159887		-0.993877	0.00142514		-0.995982	0.00171024		-0.992509	0.00163254		-0.997251	0.0010723		-0.998539	0.00186817
-0.995338	0.00467949		-0.986764	0.00429924		-0.995685	0.00248805		-0.993404	0.00195563		-0.99341	0.000403034		-0.996201	0.000593646		-0.991856	0.000922965		-0.99088	0.0015412		-0.993503	0.00256672		-0.99032	0.00155838		-0.985075	0.00157032		-0.989497	0.0018317		-0.990981	0.00130219		-0.986573	0.00164764		-0.992875	0.0011889		-0.992917	0.00132568
-0.990338	0.00434792		-0.982393	0.00520201		-0.98881	0.00223894		-0.98653	0.0021043		-0.98591	0.000964932		-0.992138	0.00159743		-0.985608	0.00125552		-0.986817	0.00117837		-0.987565	0.00203856		-0.985635	0.00137725		-0.979765	0.00166263		-0.9845	0.00151665		-0.986605	0.000952122		-0.982514	0.00183094		-0.988187	0.00189024		-0.988545	0.00167927
-0.982525	0.0051126		-0.977392	0.00684132		-0.980684	0.00239823		-0.982154	0.00145395		-0.980911	0.000886015		-0.986199	0.00153729		-0.981232	0.00109979		-0.980882	0.000933032		-0.97944	0.00174553		-0.980943	0.00212693		-0.97539	0.00160982		-0.976688	0.00161183		-0.979105	0.00109849		-0.976571	0.00184154		-0.981	0.0014126		-0.982289	0.00164647
-0.975025	0.00507053		-0.969579	0.00535472		-0.97506	0.00229939		-0.977157	0.00198573		-0.976535	0.000625774		-0.978386	0.00158438		-0.975607	0.00109979		-0.972756	0.00177867		-0.97319	0.00190507		-0.974069	0.00196083		-0.968825	0.00150077		-0.969501	0.00144138		-0.971606	0.0012636		-0.968446	0.00154078		-0.973188	0.000974916		-0.974171	0.00220004
-0.971276	0.00551503		-0.96208	0.00503296		-0.970997	0.00197812		-0.969966	0.00159693		-0.96966	0.000841715		-0.971825	0.00134648		-0.967795	0.00132832		-0.965882	0.00161332		-0.969127	0.00217887		-0.965944	0.0017283		-0.960703	0.00229119		-0.964809	0.00115127		-0.966917	0.000943715		-0.961884	0.00180885		-0.968187	0.00141066		-0.968228	0.0012827
-0.967213	0.004605		-0.95833	0.00419468		-0.964435	0.0015985		-0.962467	0.00149089		-0.961536	0.00144441		-0.96745	0.00178602		-0.960919	0.00120931		-0.96182	0.000662985		-0.963189	0.00161376		-0.960321	0.00159968		-0.954764	0.00143765		-0.960124	0.000972131		-0.963168	0.00112565		-0.957826	0.00189294		-0.964128	0.000610645		-0.964169	0.00132636
-0.960025	0.00452776		-0.953954	0.00386006		-0.956622	0.00201305		-0.957157	0.00230452		-0.956222	0.00118087		-0.962136	0.00194344		-0.956545	0.00112406		-0.956506	0.000548631		-0.955064	0.00201762		-0.956262	0.00132316		-0.950701	0.00134792		-0.952937	0.00208909		-0.956606	0.000775364		-0.952195	0.00151305		-0.956624	0.00115306		-0.958233	0.00203897
-0.952525	0.00444655		-0.946767	0.00393544		-0.950685	0.00174685		-0.952781	0.00221102		-0.95216	0.000689649		-0.95401	0.00147582		-0.951544	0.00196916		-0.948693	0.0011377		-0.948814	0.00236041		-0.950006	0.00209169		-0.944766	0.00181548		-0.945125	0.00251487		-0.948794	0.00219805		-0.943765	0.00127361		-0.948503	0.00160953		-0.949795	0.00162611
-0.947525	0.00427981		-0.93958	0.00388729		-0.946622	0.00155378		-0.94622	0.00285385		-0.945285	0.000949685		-0.947449	0.00161401		-0.943419	0.00124412		-0.941506	0.000795986		-0.945064	0.00176646		-0.941881	0.00160462		-0.93664	0.00162978		-0.939807	0.00219822		-0.94348	0.00189196		-0.937196	0.00204693		-0.943815	0.00114183		-0.943539	0.00182451
-0.943151	0.00374583		-0.934579	0.00382194		-0.940373	0.00142481		-0.938095	0.00207717		-0.93716	0.00112091		-0.943699	0.00198103		-0.936232	0.00131313		-0.937131	0.000191864		-0.939752	0.0016695		-0.935945	0.000807361		-0.930075	0.00121483		-0.935748	0.00149172		-0.939104	0.00176586		-0.933762	0.00206632		-0.940377	0.000796343		-0.940106	0.00140893
-0.936276	0.00332944		-0.930204	0.0038276		-0.931934	0.00171845		-0.932468	0.00187353		-0.931848	0.00164449		-0.938698	0.00163745		-0.932482	0.00190164		-0.932443	0.000779811		-0.932252	0.00214748		-0.931886	0.00139072		-0.926012	0.00197884		-0.928561	0.00113869		-0.932856	0.00150223		-0.928758	0.00133719		-0.933812	0.000611077		-0.934796	0.00224325
-0.928463	0.0044112		-0.92333	0.00412802		-0.925997	0.00216198		-0.928405	0.00344834		-0.928411	0.00197849		-0.931198	0.00147052		-0.928107	0.00198478		-0.92463	0.00130665		-0.925689	0.002763		-0.925638	0.00226137		-0.92039	0.00195737		-0.920749	0.000358515		-0.924731	0.0011735		-0.921258	0.00130247		-0.926	0.00144067		-0.927296	0.00220592
-0.922526	0.00530985		-0.915205	0.00448877		-0.92256	0.00169254		-0.921531	0.00220578		-0.922161	0.00129708		-0.924324	0.00102501		-0.920607	0.00156655		-0.91713	0.0017717		-0.921315	0.00176091		-0.917512	0.00191235		-0.911951	0.00189297		-0.915752	0.00107166		-0.918478	0.000950398		-0.914384	0.00136808		-0.92069	0.00155879		-0.920727	0.0011637
-0.918463	0.00540537		-0.909578	0.0039387		-0.917247	0.00211784		-0.913406	0.00138143		-0.914348	0.00134448		-0.919949	0.000905392		-0.91342	0.00127493		-0.913068	0.00178968		-0.916314	0.00176732		-0.911256	0.00173481		-0.90539	0.000786985		-0.911998	0.000845153		-0.914107	0.00172253		-0.910012	0.0009485		-0.916314	0.00132817		-0.916356	0.00193151
-0.912213	0.00570659		-0.905515	0.00393522		-0.909434	0.00235658		-0.908092	0.00192712		-0.908724	0.00106033		-0.914948	0.00105684		-0.908732	0.00104788		-0.908692	0.00150952		-0.908815	0.00217524		-0.907823	0.00165086		-0.901953	0.00100981		-0.905749	0.00164706		-0.90848	0.00074497		-0.905007	0.000958195		-0.910062	0		-0.911358	0.00139694
-0.904088	0.00465431		-0.899267	0.00427528		-0.902872	0.00220343		-0.904342	0.00244795		-0.904348	0.00106095		-0.907761	0.00134294		-0.904044	0.000531749		-0.901505	0.00138281		-0.901315	0.00277709		-0.902505	0.00191347		-0.896952	0.00164975		-0.897937	0.00143314		-0.900668	0.000953631		-0.89782	0.00117576		-0.901937	0.00104855		-0.903546	0.000769165
-0.898151	0.00392428		-0.891141	0.00352087		-0.898497	0.00217944		-0.898719	0.00204661		-0.89841	0.000243963		-0.899948	0.0017376		-0.896857	5.61293e-05		-0.894318	0.00100313		-0.896314	0.00148327		-0.894693	0.000912181		-0.889452	0.00123458		-0.892314	0.00127139		-0.893794	0.000924962		-0.890008	0.00159647		-0.895688	0.00202195		-0.896046	0.000758985
-0.894088	0.0050445		-0.885202	0.00387226		-0.893498	0.00236944		-0.890907	0.00230953		-0.890598	0.000152271		-0.894947	0.00174247		-0.889357	0.00093858		-0.889317	0.00132889		-0.89194	0.00189546		-0.888444	0.00120509		-0.882578	0.000624908		-0.887935	0.00143909		-0.889731	0.000419477		-0.885011	0.00183748		-0.891313	0.00214136		-0.891354	0.000414218
-0.88815	0.00449137		-0.881139	0.00383174		-0.885685	0.00291661		-0.884967	0.00162247		-0.884035	0.000866852		-0.890576	0.00146875		-0.883732	0.00110338		-0.884942	0.00168993		-0.884751	0.00185339		-0.884073	0.00141384		-0.878203	0.000941549		-0.881999	0.0008797		-0.884417	0.000531783		-0.880639	0.00183838		-0.886003	0.0015793		-0.886982	0.000992224
-0.880025	0.00357272		-0.874891	0.00363285		-0.878497	0.00270876		-0.880592	0.0015707		-0.879659	0.000574879		-0.884011	0.00125871		-0.87967	0.000526896		-0.878068	0.000902927		-0.876939	0.00186257		-0.878763	0.000889063		-0.873202	0.00122856		-0.873874	0.000732816		-0.876292	0.000600115		-0.873757	0.0024266		-0.877877	0.00198848		-0.879483	0.00166343
-0.873463	0.00391532		-0.866765	0.003891		-0.87381	0.00248958		-0.874969	0.00221992		-0.874347	0.000934231		-0.875885	0.0012335		-0.873106	0.000415693		-0.870255	0.00166184		-0.871627	0.0012588		-0.87095	0.000673811		-0.865702	0.00177898		-0.867313	0.00149355		-0.869418	0.00113858		-0.86564	0.00134936		-0.871	0.00113082		-0.87167	0.00244006
-0.870026	0.00377187		-0.860517	0.00375223		-0.869122	0.00284368		-0.867156	0.0025809		-0.866848	0.000443008		-0.870263	0.000934135		-0.864981	0.000974874		-0.864629	0.00120825		-0.867564	0.0018457		-0.863756	0.00120218		-0.858202	0.0019417		-0.863246	0.00135444		-0.865668	0.00215171		-0.860322	0.000447984		-0.866624	0.000906251		-0.866665	0.00183989
-0.865026	0.00372428		-0.85708	0.0034346		-0.861935	0.00195931		-0.860282	0.0016008		-0.859661	0.000472885		-0.866513	0.000940768		-0.859044	0.00155706		-0.860257	0.000965833		-0.860377	0.00297401		-0.859071	0.00186634		-0.853201	0.00208854		-0.857936	0.000980825		-0.860979	0.00139984		-0.856263	0.000897547		-0.861627	0.00162162		-0.862294	0.00155982
-0.857213	0.00387773		-0.851766	0.00428312		-0.854122	0.00156779		-0.855907	0.00113379		-0.855285	0.00035523		-0.859635	0.00138097		-0.855294	0.00110802		-0.854005	0.00109457		-0.852252	0.00225789		-0.854699	0.00184479		-0.848513	0.0030039		-0.850124	0.000971216		-0.85348	0.000783555		-0.849389	0.0013426		-0.853502	0.00105287		-0.855107	0.00157453
-0.85065	0.00453224		-0.843954	0.00484931		-0.849435	0.00173342		-0.850906	0.00116252		-0.850286	0.000779693		-0.8512	0.000617966		-0.849045	0.000807964		-0.846192	0.00150593		-0.847251	0.00155738		-0.8472	0.00132518		-0.841639	0.00151708		-0.842937	0.00146243		-0.846293	0.000898663		-0.841264	0.000797444		-0.846315	0.00127441		-0.846982	0.00188604
-0.846276	0.0042605		-0.837392	0.00408139		-0.845059	0.00146991		-0.843093	0.00077167		-0.842474	0.000854902		-0.845887	0.000977249		-0.840607	0.000384464		-0.839944	0.00122218		-0.843501	0.00142581		-0.8397	0.00127445		-0.833514	0.000402079		-0.838557	0.00113526		-0.841605	0.00139962		-0.835946	0.00171731		-0.842252	0.00220355		-0.842289	0.00260951
-0.841275	0.00438034		-0.833017	0.00305424		-0.83756	0.00184051		-0.835594	0.0011876		-0.834972	0.000311753		-0.84245	0.0011203		-0.834982	0.00127008		-0.835881	0.000782731		-0.837253	0.00151146		-0.834695	0.000669771		-0.8282	0.00103965		-0.83356	0.000936898		-0.836916	0.00175486		-0.832513	0.00138747		-0.837877	0.00211545		-0.838543	0.00282012
-0.833776	0.00393756		-0.827703	0.00418749		-0.829747	0.0021305		-0.831218	0.00175564		-0.830909	0.000254472		-0.83651	0.00108713		-0.831545	0.00103797		-0.829942	0.00190358		-0.829751	0.00195804		-0.830324	0.0014089		-0.824141	0.00185669		-0.825748	0.00173995		-0.829729	0.000787219		-0.826264	0.00119741		-0.830377	0.00170648		-0.831982	0.001708
-0.826275	0.0040755		-0.820203	0.00305075		-0.82506	0.00104731		-0.82653	0.00160035		-0.826849	0.000676256		-0.828698	0.00154945		-0.825919	0.00123779		-0.821816	0.00136596		-0.824126	0.00196146		-0.823137	0.00232041		-0.817263	0.00159587		-0.818561	0.00155532		-0.821917	0.00166282		-0.818765	0.00140257		-0.82319	0.00123705		-0.824482	0.00183717
-0.821275	0.00434844		-0.813016	0.0041034		-0.821309	0.00123788		-0.818717	0.00145828		-0.81966	0.000255296		-0.822762	0.00098565		-0.818106	0.000719339		-0.815568	0.000731283		-0.819753	0.00272733		-0.815011	0.00155434		-0.809138	0.00156238		-0.814494	0.00142514		-0.816607	0.00193787		-0.812821	0.00140415		-0.818502	0.00170734		-0.819165	0.00208331
-0.8169	0.00406912		-0.808015	0.0047515		-0.814747	0.00181882		-0.811218	0.00206212		-0.812473	0.00126886		-0.818386	0.00147604		-0.811858	0.000664898		-0.812131	0.00136484		-0.813815	0.00188863		-0.810319	0.00138937		-0.804141	0.00124531		-0.810123	0.000725724		-0.812544	0.00129055		-0.80845	0.00198809		-0.813813	0.00168446		-0.814793	0.00295518
-0.809713	0.00393377		-0.80364	0.00449683		-0.807247	0.00148949		-0.806842	0.00172987		-0.807472	0.000799886		-0.813073	0.000870238		-0.807482	0.00030238		-0.806817	0.00141381		-0.80569	0.0015924		-0.806573	0.000923853		-0.800391	0.00115236		-0.802936	0.00128397		-0.805979	0.0020172		-0.802514	0.0011832		-0.806939	0.00122151		-0.808545	0.00223533
-0.8019	0.00351134		-0.796453	0.00337883		-0.801934	0.00183303		-0.80278	0.00148428		-0.803098	0.000989864		-0.804947	0.000959119		-0.80217	0.000693807		-0.799317	0.00157175		-0.799127	0.0016176		-0.800012	0.00160148		-0.794138	0.00114033		-0.795749	0.00174178		-0.797854	0.00194477		-0.794702	0.00120034		-0.798814	0.00125217		-0.800419	0.00222877
-0.796588	0.00355599		-0.78864	0.00412605		-0.79756	0.00145475		-0.795906	0.000851025		-0.796222	0.000758676		-0.798073	0.00165204		-0.794358	0.000699293		-0.792756	0.00183618		-0.795064	0.00127012		-0.792512	0.00152808		-0.786639	0.00167079		-0.790752	0.000499679		-0.792231	0.00152615		-0.788133	0.00178788		-0.793187	0.00111549		-0.794171	0.00233464
-0.792525	0.00322167		-0.78333	0.0041156		-0.791309	0.00191536		-0.788406	0.00159784		-0.788097	0.00098801		-0.793698	0.00118066		-0.787482	0.00114917		-0.788381	0.00104357		-0.789752	0.00199648		-0.787195	0.00140486		-0.780703	0.00202478		-0.786372	0.001405		-0.788168	0.00199004		-0.783761	0.00195742		-0.789125	0.00112412		-0.790104	0.00141119
-0.785338	0.00338064		-0.779268	0.00317101		-0.783497	0.00264446		-0.783405	0.00223884		-0.782472	0.00153775		-0.7887	0.00167282		-0.782795	0.00191725		-0.783067	0.000420572		-0.781627	0.00235379		-0.782823	0.0017485		-0.77664	0.00273727		-0.779498	0.00186647		-0.781603	0.00201677		-0.778451	0.00144225		-0.782563	0.00135819		-0.784482	0.00202652
-0.777213	0.00412705		-0.772077	0.00315641		-0.777247	0.00183974		-0.779029	0.00265113		-0.77841	0.00125505		-0.780888	0.00193084		-0.777794	0.0016001		-0.775567	0.00109816		-0.774753	0.00180726		-0.776574	0.00114202		-0.770701	0.00151494		-0.771686	0.0012643		-0.773169	0.0011125		-0.770638	0.000796767		-0.774438	0.0015875		-0.776356	0.000985663
-0.772213	0.00466173		-0.763952	0.00324921		-0.772872	0.00203761		-0.772468	0.00217112		-0.772161	0.00125979		-0.773697	0.00132216		-0.770295	0.000721238		-0.768067	0.000814184		-0.770377	0.00332149		-0.768449	0.00174221		-0.762888	0.00098985		-0.766063	0.00117141		-0.767542	0.00146192		-0.763452	0.00111489		-0.768815	0.00190211		-0.769482	0.00144626
-0.768775	0.00344478		-0.758955	0.00416331		-0.767247	0.00280376		-0.764343	0.00225868		-0.764349	0.000886015		-0.769013	0.000927502		-0.762795	0.000709421		-0.763379	0.00141606		-0.765376	0.00225127		-0.762193	0.00130857		-0.756014	0.00114076		-0.761996	0.00129038		-0.764105	0.00169774		-0.759072	0.00162217		-0.764753	0.00194422		-0.765103	0.00161027
-0.762213	0.00284476		-0.755517	0.00381693		-0.759435	0.00194396		-0.758407	0.00202084		-0.758098	0.00100676		-0.764325	0.00217361		-0.758107	0.000959259		-0.759004	0.00203681		-0.757253	0.00121587		-0.758134	0.000973906		-0.751639	0.00178199		-0.755748	0.00188684		-0.758166	0.00155051		-0.754075	0.000839379		-0.7585	0.00152294		-0.760106	0.00159353
-0.7544	0.00255992		-0.748952	0.00345377		-0.75256	0.00146838		-0.754344	0.00232253		-0.754036	0.000861083		-0.756512	0.00255986		-0.753731	0.000767027		-0.751817	0.00180518		-0.750064	0.00188137		-0.752511	0.000959541		-0.746638	0.00190821		-0.74731	0.00220371		-0.750666	0.00144144		-0.746262	0.000136853		-0.750062	0.00190643		-0.75198	0.00199417
-0.749088	0.00352151		-0.74114	0.00469224		-0.748497	0.00216025		-0.748405	0.00241375		-0.748098	0.000864174		-0.749012	0.00134228		-0.746232	0.00122935		-0.744004	0.000860915		-0.746001	0.00252593		-0.744699	0.00164121		-0.738512	0.00221154		-0.741374	0.00159261		-0.74473	0.00126102		-0.738763	0.00144248		-0.744127	0.0021623		-0.745106	0.00214733
-0.744713	0.00367772		-0.735517	0.00278585		-0.743184	0.00171672		-0.74028	0.00162748		-0.73966	0.00145039		-0.74495	0.00221782		-0.738419	0.00143193		-0.738694	0.00109412		-0.741628	0.00208063		-0.737825	0.00154245		-0.731326	0.00235902		-0.73762	0.00175071		-0.740355	0.000869779		-0.734696	0.00187761		-0.74069	0.00271638		-0.74104	0.00171727
-0.738775	0.00373152		-0.731142	0.00397792		-0.73506	0.00191709		-0.733718	0.0016585		-0.733722	0.00162759		-0.740887	0.00180526		-0.733733	0.00141652		-0.734631	0.00133788		-0.734439	0.00175066		-0.733758	0.00247326		-0.72695	0.00217763		-0.731372	0.00163585		-0.734728	0.00210083		-0.730637	0.00175812		-0.735376	0.00201828		-0.736668	0.00178944
-0.73065	0.00380773		-0.725202	0.00437658		-0.727872	0.00238192		-0.729656	0.00291063		-0.729973	0.00132676		-0.7337	0.00177077		-0.729983	0.00154418		-0.727445	0.00218666		-0.727252	0.00223462		-0.728448	0.00224768		-0.722266	0.00184252		-0.722934	0.00179372		-0.726916	0.00204802		-0.723451	0.00184154		-0.727563	0.00169914		-0.729168	0.00223691
-0.724088	0.00468104		-0.717077	0.00535625		-0.724122	0.00337433		-0.724029	0.00266664		-0.724661	0.0013284		-0.7262	0.00172854		-0.723107	0.00126713		-0.719319	0.000944714		-0.722251	0.00251119		-0.720323	0.00223332		-0.714453	0.00224181		-0.716998	0.00233595		-0.719729	0.0025811		-0.716264	0.00186656		-0.721315	0.0014519		-0.722294	0.0023541
-0.720025	0.00372773		-0.710515	0.00471947		-0.719435	0.00332386		-0.715595	0.00175952		-0.717161	0.00193254		-0.721199	0.00163457		-0.715607	0.00211244		-0.714631	0.00132395		-0.717878	0.0020298		-0.713136	0.00243061		-0.706953	0.0026557		-0.713557	0.0023753		-0.715353	0.00201547		-0.710946	0.00215831		-0.716939	0.00263692		-0.717602	0.00317801
-0.714713	0.0032165		-0.706453	0.00529699		-0.711934	0.00347125		-0.70903	0.00219985		-0.710598	0.000938558		-0.716824	0.00228504		-0.710295	0.00173747		-0.710881	0.000785203		-0.711002	0.00207145		-0.709382	0.00289052		-0.702578	0.00232983		-0.707934	0.00280177		-0.710356	0.00214244		-0.706574	0.00316227		-0.711313	0.00334905		-0.712918	0.00290948
-0.706901	0.0035153		-0.701143	0.00482796		-0.705059	0.00351021		-0.705593	0.00221308		-0.705909	0.00130862		-0.710263	0.00270579		-0.70592	0.00162416		-0.704629	0.00178451		-0.703189	0.00221646		-0.705011	0.00240009		-0.698515	0.0024713		-0.700435	0.002918		-0.702856	0.0023983		-0.700013	0.00302113		-0.703813	0.00293835		-0.705731	0.00322687
-0.699713	0.00355599		-0.693017	0.00512707		-0.700372	0.00358583		-0.700592	0.00251499		-0.70091	0.00247507		-0.702137	0.00279489		-0.699669	0.00343337		-0.696816	0.00274203		-0.697564	0.00312308		-0.697511	0.00228651		-0.691328	0.00229462		-0.693874	0.00211563		-0.695357	0.00294237		-0.692201	0.00315889		-0.696626	0.00295757		-0.697918	0.00308865
-0.695337	0.00431947		-0.68614	0.00496695		-0.695684	0.00326168		-0.693092	0.0017773		-0.693411	0.00237576		-0.696511	0.00343806		-0.691857	0.00286111		-0.691193	0.00263801		-0.693502	0.00335651		-0.690324	0.0029179		-0.684138	0.00341242		-0.689494	0.00241283		-0.690669	0.00274169		-0.686257	0.00272172		-0.691938	0.00275438		-0.692296	0.00359494
-0.690338	0.00510812		-0.681768	0.00521464		-0.688809	0.00296785		-0.686218	0.00329921		-0.685911	0.00295847		-0.692135	0.00398992		-0.685606	0.00218967		-0.686818	0.00314126		-0.68694	0.00412986		-0.685632	0.00282116		-0.679141	0.00396562		-0.684497	0.00282419		-0.68598	0.00224418		-0.682198	0.00309689		-0.686937	0.00234174		-0.688229	0.00314883
-0.682526	0.00439827		-0.676454	0.0065091		-0.680997	0.00267997		-0.681842	0.00419835		-0.681223	0.00361391		-0.6862	0.00512326		-0.681233	0.00190375		-0.680879	0.00345467		-0.678815	0.00432315		-0.680948	0.00326401		-0.674765	0.00314193		-0.676684	0.00254072		-0.678168	0.00299238		-0.676263	0.00306487		-0.679437	0.00338467		-0.681668	0.003435
-0.675025	0.00429533		-0.668642	0.00638406		-0.675685	0.00307456		-0.676845	0.00408889		-0.676534	0.00303656		-0.678387	0.00521568		-0.675606	0.00336057		-0.672757	0.0042547		-0.672877	0.0039101		-0.673761	0.00293204		-0.667891	0.00285771		-0.669498	0.00323258		-0.670668	0.00278739		-0.668137	0.00383616		-0.671937	0.0036304		-0.673542	0.00385895
-0.671275	0.00433206		-0.661142	0.00642654		-0.67131	0.00314345		-0.669342	0.00391102		-0.669347	0.003215		-0.671826	0.0046322		-0.667483	0.00342198		-0.666192	0.00455215		-0.669128	0.00436415		-0.665948	0.00365501		-0.660078	0.00426037		-0.664813	0.00345725		-0.666293	0.00383522		-0.661576	0.00304864		-0.667253	0.00376449		-0.667607	0.00399333
-0.666901	0.00460069		-0.657392	0.00640344		-0.664747	0.00451376		-0.661842	0.00386952		-0.661535	0.00302358		-0.66745	0.00590904		-0.66092	0.00375495		-0.662129	0.00428727		-0.662877	0.00521652		-0.660631	0.0045535		-0.654139	0.00481272		-0.660121	0.00257344		-0.66223	0.00497186		-0.65751	0.00320037		-0.662877	0.00421578		-0.663853	0.00464915
-0.659713	0.00546779		-0.653017	0.00797479		-0.656622	0.00430687		-0.656845	0.00414955		-0.656536	0.00350491		-0.661824	0.0062628		-0.656857	0.00522148		-0.656819	0.00435849		-0.654439	0.0053483		-0.656259	0.00428999		-0.650076	0.00563276		-0.652621	0.00351766		-0.655356	0.00501519		-0.651574	0.00484779		-0.655378	0.00520905		-0.657605	0.00510409
-0.652525	0.00500432		-0.645517	0.00779964		-0.650684	0.00512714		-0.652469	0.00534012		-0.65216	0.00408288		-0.653698	0.00695483		-0.651232	0.0047906		-0.648694	0.00553371		-0.648189	0.00571436		-0.649698	0.00486594		-0.643828	0.00533802		-0.645122	0.00468472		-0.647856	0.00552239		-0.643449	0.00455267		-0.647565	0.00551416		-0.649167	0.00495139
-0.647525	0.00543451		-0.63833	0.00759486		-0.646622	0.00527875		-0.645595	0.00476889		-0.644973	0.00382326		-0.647137	0.00841429		-0.643107	0.00489948		-0.641816	0.00571951		-0.644752	0.0063019		-0.641885	0.00526973		-0.635703	0.00696394		-0.640124	0.00524136		-0.642855	0.0054726		-0.6372	0.00486898		-0.642877	0.00692201		-0.643231	0.00568866
-0.642838	0.00640093		-0.633642	0.00781031		-0.640372	0.00574416		-0.63747	0.00564181		-0.637161	0.00439649		-0.6437	0.00922704		-0.636233	0.00619509		-0.637444	0.00587048		-0.63944	0.00515651		-0.635949	0.00632826		-0.62945	0.00680508		-0.635432	0.00547954		-0.63848	0.0062387		-0.633447	0.00545765		-0.639127	0.00607233		-0.63979	0.00544298
-0.635963	0.00634886		-0.628953	0.0076539		-0.632247	0.00596621		-0.632156	0.00639546		-0.63216	0.00571707		-0.638699	0.0104652		-0.632481	0.00673824		-0.632131	0.00759523		-0.631627	0.00549225		-0.631883	0.00702541		-0.625388	0.00718784		-0.628245	0.00630341		-0.631918	0.00548661		-0.628449	0.00642509		-0.632562	0.00696563		-0.634167	0.00552781
-0.62815	0.00635351		-0.622079	0.00856124		-0.626622	0.0059096		-0.628093	0.00754453		-0.62841	0.00655837		-0.630886	0.0117469		-0.627795	0.00657723		-0.624318	0.00898164		-0.625377	0.00665964		-0.625634	0.00689299		-0.619452	0.00833462		-0.620433	0.00723573		-0.624106	0.00714167		-0.620637	0.0074135		-0.625062	0.00835189		-0.626355	0.00712994
-0.622525	0.00718372		-0.613954	0.00893681		-0.622872	0.00621897		-0.621219	0.0077151		-0.62216	0.00680151		-0.624325	0.0128194		-0.620295	0.00866752		-0.617444	0.00920608		-0.621001	0.00707141		-0.617196	0.00697424		-0.611327	0.00908575		-0.615749	0.00903265		-0.617854	0.0093395		-0.614076	0.00660726		-0.619439	0.0107573		-0.620419	0.00791652
-0.618463	0.00784202		-0.60864	0.00910303		-0.617247	0.00695767		-0.613094	0.00956355		-0.614347	0.00797146		-0.61995	0.014307		-0.613419	0.00972131		-0.613381	0.00905173		-0.615689	0.00788491		-0.611574	0.00733853		-0.605078	0.00935001		-0.611995	0.00724557		-0.613791	0.00926923		-0.609696	0.00817757		-0.615064	0.0100441		-0.61604	0.00973922
-0.611901	0.00848359		-0.604578	0.0111451		-0.609434	0.00777582		-0.60778	0.0103633		-0.608722	0.00831391		-0.614949	0.0165925		-0.608733	0.00951726		-0.609006	0.00873563		-0.60819	0.00986921		-0.608133	0.00863183		-0.601637	0.00955567		-0.605434	0.00922621		-0.607855	0.00990039		-0.604699	0.0081769		-0.608812	0.00948594		-0.610417	0.00839702
-0.604088	0.00882102		-0.598016	0.0135637		-0.603185	0.00920428		-0.60403	0.0104802		-0.604347	0.00923929		-0.607449	0.0186274		-0.604044	0.00925582		-0.601506	0.00838942		-0.601003	0.0107209		-0.60251	0.0103213		-0.596327	0.0114027		-0.597621	0.0113622		-0.59973	0.00997368		-0.597199	0.00908436		-0.60069	0.0118054		-0.602917	0.00913248
-0.59815	0.0102709		-0.589891	0.0142774		-0.598809	0.0105836		-0.597782	0.011132		-0.598409	0.0106419		-0.599949	0.0185469		-0.596858	0.0104537		-0.594632	0.00984884		-0.596315	0.0112623		-0.594697	0.0115942		-0.588828	0.0121178		-0.592311	0.0120927		-0.593169	0.0112703		-0.5897	0.0116386		-0.594438	0.0130459		-0.59573	0.0109681
-0.593775	0.0119163		-0.583955	0.0142096		-0.593497	0.0118397		-0.590282	0.0119709		-0.590597	0.0109087		-0.594948	0.0217403		-0.589045	0.0123222		-0.589631	0.0126935		-0.591626	0.0121647		-0.588449	0.0122485		-0.582262	0.0126049		-0.587932	0.0125361		-0.589106	0.0130331		-0.584695	0.0132587		-0.590062	0.0133193		-0.591046	0.0138486
-0.587526	0.011761		-0.580205	0.0154344		-0.585684	0.0118528		-0.584342	0.0141274		-0.584036	0.0129424		-0.590573	0.0240697		-0.584044	0.0132958		-0.585256	0.0131928		-0.584127	0.0120276		-0.58407	0.0125616		-0.577578	0.014395		-0.581683	0.0135462		-0.583479	0.0131851		-0.58001	0.0134679		-0.58444	0.015253		-0.586354	0.0161321
-0.5794	0.013781		-0.57364	0.0172427		-0.578497	0.0148172		-0.579967	0.0153944		-0.57966	0.0138556		-0.583386	0.0246402		-0.57967	0.015234		-0.578381	0.0152278		-0.576314	0.0135356		-0.578759	0.013977		-0.572577	0.0166926		-0.573871	0.0158138		-0.575354	0.0151697		-0.573136	0.0147418		-0.576627	0.0164347		-0.578854	0.0151001
-0.573463	0.014315		-0.565202	0.0182581		-0.574122	0.015913		-0.574344	0.0160457		-0.574348	0.0139381		-0.575573	0.0267388		-0.573107	0.0151994		-0.570256	0.017101		-0.571315	0.0156122		-0.570947	0.0149659		-0.565077	0.0192826		-0.567622	0.0168987		-0.568793	0.0182893		-0.565324	0.0165188		-0.569749	0.0191252		-0.571354	0.0173252
-0.569713	0.0164058		-0.559579	0.0221846		-0.569435	0.0167845		-0.566532	0.0193125		-0.566536	0.0163247		-0.570263	0.0302107		-0.564982	0.0183791		-0.564942	0.0198484		-0.56694	0.0188863		-0.56376	0.0172695		-0.557578	0.0220356		-0.563251	0.0189553		-0.565043	0.0192058		-0.560014	0.0187132		-0.56569	0.0218474		-0.566357	0.0198273
-0.564401	0.0183783		-0.55583	0.0246812		-0.561623	0.0193064		-0.559658	0.0201494		-0.55966	0.0200326		-0.565888	0.0337129		-0.559357	0.0199128		-0.56088	0.0216581		-0.559753	0.0195404		-0.559068	0.0200179		-0.552889	0.0227494		-0.557933	0.0201391		-0.560042	0.0202996		-0.555634	0.020258		-0.560064	0.0224144		-0.561978	0.0205559
-0.5569	0.0195471		-0.550203	0.0248879		-0.554123	0.0228415		-0.555595	0.0225107		-0.555286	0.0228701		-0.55901	0.0370711		-0.555295	0.0210389		-0.554318	0.0217161		-0.551627	0.0222122		-0.554384	0.0227235		-0.548201	0.0247188		-0.55012	0.0213807		-0.552542	0.0238876		-0.54876	0.0225273		-0.551938	0.0234593		-0.554478	0.0222956
-0.550338	0.0231855		-0.542703	0.0282336		-0.549435	0.0246776		-0.550281	0.0240269		-0.549972	0.0232511		-0.550888	0.0407053		-0.548731	0.0225253		-0.546193	0.0249479		-0.546939	0.026035		-0.546884	0.0235511		-0.541014	0.0285101		-0.543246	0.0277951		-0.545668	0.0266736		-0.540635	0.0272251		-0.545377	0.0279815		-0.546666	0.0252969
-0.545963	0.0258139		-0.536142	0.0324882		-0.545059	0.0259769		-0.542156	0.0255873		-0.54216	0.0251266		-0.545887	0.0458215		-0.540608	0.0262494		-0.540254	0.0300242		-0.543502	0.0285579		-0.539384	0.0281506		-0.533202	0.0329843		-0.538875	0.0325553		-0.541293	0.030017		-0.535638	0.0314058		-0.541627	0.0341644		-0.541981	0.0294321
-0.540651	0.0291547		-0.531766	0.0362478		-0.53756	0.0286962		-0.534969	0.0299079		-0.534973	0.0294289		-0.542138	0.0464675		-0.534981	0.033286		-0.536195	0.0320765		-0.536939	0.0292407		-0.5347	0.0331142		-0.528201	0.036501		-0.53387	0.0321574		-0.536292	0.0330962		-0.531884	0.0330178		-0.536626	0.0360183		-0.538228	0.031067
-0.533151	0.0317581		-0.526453	0.0410978		-0.529747	0.0332048		-0.530906	0.0361779		-0.53091	0.0345295		-0.535885	0.0464434		-0.531544	0.0357612		-0.529942	0.0345035		-0.529126	0.0338507		-0.530008	0.0352644		-0.523825	0.0397687		-0.525745	0.0352349		-0.528792	0.036194		-0.525636	0.0347259		-0.529126	0.0388658		-0.531353	0.0309958
-0.525963	0.0342685		-0.518953	0.0446588		-0.525372	0.039851		-0.525905	0.0374321		-0.526535	0.0373223		-0.528386	0.0526914		-0.525607	0.0378359		-0.521504	0.0393354		-0.523814	0.0397017		-0.522508	0.0364704		-0.516638	0.0412439		-0.518558	0.0422556		-0.521292	0.0421827		-0.518136	0.0397223		-0.522252	0.0428825		-0.523854	0.0386415
-0.520963	0.0388685		-0.511766	0.0521029		-0.521622	0.0438961		-0.518093	0.0407576		-0.519348	0.0399236		-0.52245	0.0566796		-0.517794	0.0426493		-0.515881	0.0468529		-0.519439	0.0433248		-0.515008	0.0454223		-0.508513	0.0464759		-0.514812	0.0473716		-0.516291	0.0495675		-0.512513	0.0480723		-0.517564	0.050817		-0.518544	0.0450183
-0.516587	0.0445894		-0.507078	0.0597624		-0.514748	0.0460268		-0.510593	0.047953		-0.512161	0.0458643		-0.518074	0.060455		-0.511857	0.0494303		-0.512444	0.0522776		-0.513189	0.0465805		-0.510324	0.0523654		-0.503828	0.0570277		-0.51012	0.0523782		-0.511919	0.0512057		-0.508134	0.0534461		-0.512876	0.053019		-0.514477	0.0481056
-0.509401	0.0484108		-0.502389	0.0639312		-0.507248	0.0526534		-0.50653	0.0555274		-0.507473	0.0534704		-0.512448	0.0691959		-0.507481	0.0547913		-0.506818	0.0556584		-0.505376	0.0535921		-0.50657	0.0554384		-0.500075	0.0651296		-0.50262	0.0583633		-0.505042	0.0564589		-0.502198	0.0547404		-0.505689	0.0562495		-0.507916	0.0536147
-0.501588	0.0539036		-0.49489	0.0685531		-0.501934	0.0595948		-0.502468	0.0614857		-0.502784	0.0575578		-0.504635	0.073303		-0.501856	0.0587851		-0.499005	0.0626232		-0.499128	0.0613969		-0.500009	0.0590853		-0.493514	0.0694367		-0.495746	0.0659336		-0.496916	0.0642216		-0.494073	0.0581004		-0.497876	0.06612		-0.499791	0.062254
-0.496275	0.0633898		-0.48739	0.0760471		-0.497559	0.0657018		-0.495281	0.0650861		-0.49591	0.0632963		-0.497761	0.0838915		-0.494044	0.0637452		-0.492444	0.0712445		-0.494752	0.0708678		-0.492196	0.0670965		-0.486014	0.0754282		-0.490749	0.0719988		-0.491293	0.0710063		-0.487512	0.0708577		-0.49225	0.0764617		-0.493542	0.0724837
-0.492212	0.0704033		-0.482393	0.0858818		-0.490997	0.0709696		-0.487781	0.0738376		-0.487785	0.0702318		-0.493386	0.0902916		-0.48717	0.0747002		-0.488381	0.077698		-0.489127	0.0711		-0.486886	0.0760437		-0.480391	0.085495		-0.486064	0.0786365		-0.487231	0.0808023		-0.483445	0.081459		-0.488187	0.0832237		-0.489483	0.078741
-0.485026	0.0744243		-0.478017	0.0939571		-0.483185	0.0784351		-0.48278	0.0801127		-0.48216	0.0849293		-0.488388	0.0973676		-0.482794	0.0843977		-0.483067	0.0838466		-0.481315	0.0775576		-0.48282	0.0816638		-0.476016	0.0937923		-0.479182	0.0875479		-0.480357	0.0861187		-0.478135	0.0855963		-0.481626	0.0893796		-0.483853	0.0822396
-0.4769	0.0863175		-0.47083	0.102825		-0.476934	0.0901718		-0.478404	0.0885294		-0.478098	0.088537		-0.480576	0.102284		-0.477795	0.0894795		-0.475255	0.0889177		-0.474439	0.0902133		-0.476259	0.0887036		-0.470076	0.0981978		-0.47137	0.0949991		-0.472231	0.0970199		-0.470323	0.0900122		-0.4735	0.0991879		-0.47604	0.0901276
-0.4719	0.0986195		-0.462705	0.111788		-0.472872	0.100605		-0.47153	0.0956152		-0.471847	0.0913434		-0.473385	0.112639		-0.469983	0.0948941		-0.468068	0.103252		-0.470065	0.105171		-0.468133	0.0996592		-0.461951	0.110435		-0.46606	0.103903		-0.466917	0.111603		-0.463136	0.101661		-0.467878	0.111163		-0.469166	0.101716
-0.468463	0.102739		-0.45833	0.123458		-0.466934	0.106741		-0.463718	0.106217		-0.463722	0.103934		-0.468701	0.126427		-0.462794	0.107246		-0.46338	0.114052		-0.465064	0.11167		-0.461885	0.109892		-0.455702	0.125901		-0.461688	0.115846		-0.46348	0.117377		-0.458764	0.116016		-0.463815	0.120341		-0.465107	0.116844
-0.4619	0.108569		-0.45458	0.133202		-0.459122	0.11327		-0.458095	0.118547		-0.457784	0.114784		-0.464013	0.130439		-0.458108	0.121783		-0.458691	0.120209		-0.456939	0.119776		-0.457818	0.1207		-0.451327	0.130487		-0.455119	0.121536		-0.457232	0.123347		-0.453759	0.125215		-0.45725	0.128628		-0.459477	0.123176
-0.454087	0.120133		-0.447702	0.136245		-0.45256	0.127902		-0.45372	0.126668		-0.453724	0.125858		-0.4562	0.13644		-0.453419	0.130804		-0.451505	0.128171		-0.449752	0.131912		-0.452195	0.130246		-0.446013	0.133312		-0.447307	0.131728		-0.449728	0.132799		-0.445947	0.133159		-0.449125	0.13678		-0.451352	0.130382
-0.448775	0.131098		-0.440202	0.150722		-0.448185	0.141117		-0.447467	0.134606		-0.447473	0.134871		-0.4487	0.149879		-0.445607	0.135725		-0.443692	0.14378		-0.446002	0.143381		-0.44407	0.137734		-0.4382	0.144447		-0.441371	0.144955		-0.443793	0.149391		-0.438447	0.144276		-0.443502	0.152603		-0.444478	0.142943
-0.4444	0.147012		-0.434892	0.161879		-0.44256	0.147365		-0.439655	0.146694		-0.439348	0.145702		-0.444638	0.164013		-0.438107	0.146368		-0.438691	0.161259		-0.441314	0.150759		-0.437509	0.158072		-0.431014	0.162249		-0.437312	0.154695		-0.43973	0.156571		-0.434388	0.161665		-0.440065	0.161042		-0.440732	0.160069
-0.438462	0.155455		-0.430517	0.173549		-0.434435	0.152801		-0.433406	0.160554		-0.43341	0.159821		-0.440575	0.173992		-0.433732	0.161191		-0.434319	0.166183		-0.434127	0.160872		-0.43345	0.168431		-0.426638	0.172213		-0.431064	0.163098		-0.433794	0.165089		-0.430322	0.17209		-0.434125	0.172354		-0.436352	0.163154
-0.430338	0.163389		-0.424264	0.185129		-0.427872	0.16923		-0.429344	0.17628		-0.429661	0.171631		-0.433388	0.178454		-0.429669	0.177038		-0.427129	0.170446		-0.42694	0.176024		-0.42782	0.172381		-0.421641	0.182628		-0.422626	0.177644		-0.425982	0.175964		-0.423135	0.175518		-0.426313	0.181522		-0.428853	0.170324
-0.424088	0.177589		-0.416143	0.198479		-0.424435	0.181999		-0.423404	0.183486		-0.424349	0.177544		-0.425888	0.192794		-0.422795	0.184468		-0.419316	0.188593		-0.422252	0.186785		-0.419694	0.179585		-0.413828	0.194134		-0.416995	0.194711		-0.419104	0.193303		-0.415635	0.191121		-0.420377	0.196477		-0.421666	0.186801
-0.419713	0.191052		-0.409891	0.217051		-0.419434	0.189968		-0.415279	0.194098		-0.416536	0.191924		-0.4212	0.206088		-0.415608	0.194814		-0.414632	0.207559		-0.417564	0.197436		-0.413133	0.195388		-0.406638	0.21161		-0.413562	0.207865		-0.414729	0.205197		-0.410638	0.207328		-0.416002	0.209477		-0.417294	0.199551
-0.4144	0.201095		-0.405515	0.222632		-0.411934	0.201541		-0.408718	0.208882		-0.410286	0.210389		-0.416825	0.213873		-0.410294	0.205744		-0.410882	0.212518		-0.410377	0.204516		-0.409387	0.212052		-0.402575	0.227296		-0.407626	0.214998		-0.409419	0.216842		-0.406259	0.22093		-0.410375	0.2236		-0.412602	0.21032
-0.406275	0.209738		-0.399892	0.235783		-0.40506	0.215359		-0.405281	0.227868		-0.40591	0.2173		-0.409951	0.222497		-0.405919	0.217689		-0.404317	0.217571		-0.402877	0.215856		-0.404382	0.222233		-0.398203	0.236453		-0.399814	0.22526		-0.401606	0.22452		-0.399384	0.224008		-0.402562	0.234131		-0.405102	0.217385
-0.3994	0.228901		-0.39208	0.249259		-0.400684	0.230031		-0.399967	0.229425		-0.400598	0.230819		-0.401825	0.233901		-0.399357	0.235035		-0.396817	0.235585		-0.397252	0.23345		-0.396882	0.230025		-0.391013	0.247859		-0.393871	0.241036		-0.394419	0.242231		-0.391572	0.233473		-0.395688	0.244075		-0.39729	0.238242
-0.395338	0.245011		-0.385202	0.263394		-0.395685	0.246715		-0.392154	0.242153		-0.393099	0.241746		-0.396199	0.256562		-0.391545	0.244824		-0.391507	0.252624		-0.39319	0.248899		-0.390008	0.244194		-0.383826	0.25987		-0.389499	0.256252		-0.389731	0.257124		-0.385949	0.252865		-0.391313	0.260446		-0.392292	0.255725
-0.390025	0.252664		-0.381139	0.281028		-0.388496	0.252449		-0.385593	0.25907		-0.385597	0.256032		-0.392136	0.280204		-0.385607	0.260469		-0.387132	0.262694		-0.386626	0.256847		-0.385637	0.26169		-0.378828	0.274426		-0.383876	0.266895		-0.385043	0.264872		-0.381883	0.268643		-0.386312	0.271765		-0.387921	0.26629
-0.3819	0.263983		-0.375516	0.288875		-0.380684	0.26834		-0.381217	0.27421		-0.380911	0.27261		-0.385888	0.287054		-0.381545	0.279623		-0.380879	0.2725		-0.378501	0.274482		-0.380632	0.270127		-0.37414	0.287972		-0.376376	0.275777		-0.377543	0.271748		-0.375634	0.274938		-0.378499	0.281872		-0.381352	0.27119
-0.374713	0.280611		-0.367391	0.303445		-0.375685	0.283015		-0.376216	0.285389		-0.376535	0.281818		-0.377762	0.287691		-0.375294	0.288239		-0.372754	0.290675		-0.372564	0.291948		-0.373445	0.282613		-0.367262	0.300011		-0.369182	0.287112		-0.370043	0.296818		-0.367509	0.292872		-0.371	0.296035		-0.373227	0.292095
-0.370963	0.297176		-0.360517	0.325093		-0.371309	0.293596		-0.368717	0.293818		-0.369035	0.293268		-0.37151	0.307311		-0.367169	0.298157		-0.366505	0.307001		-0.368814	0.300816		-0.365632	0.302081		-0.35945	0.31225		-0.36481	0.303836		-0.365668	0.314321		-0.361573	0.318203		-0.366315	0.316394		-0.367604	0.3085
-0.366588	0.305783		-0.356767	0.336925		-0.364435	0.301287		-0.361217	0.309134		-0.361223	0.310273		-0.367447	0.323956		-0.36092	0.315674		-0.36213	0.326783		-0.362565	0.310012		-0.360635	0.313711		-0.353827	0.325573		-0.359813	0.322875		-0.361605	0.317942		-0.357514	0.328343		-0.36194	0.33201		-0.363545	0.321986
-0.359088	0.311522		-0.352079	0.339983		-0.35631	0.318178		-0.35622	0.324809		-0.356535	0.328904		-0.361512	0.332125		-0.356858	0.331986		-0.356507	0.328859		-0.354127	0.320994		-0.356256	0.325913		-0.349764	0.338571		-0.352313	0.328428		-0.354418	0.328353		-0.351571	0.334529		-0.354127	0.336005		-0.356984	0.326599
-0.352213	0.33397		-0.344579	0.354197		-0.350998	0.341292		-0.351844	0.32863		-0.352161	0.33109		-0.353386	0.338652		-0.351231	0.342904		-0.348695	0.344302		-0.348502	0.339035		-0.349695	0.338424		-0.343516	0.351312		-0.344813	0.350306		-0.347231	0.343107		-0.343133	0.351631		-0.346627	0.350605		-0.348546	0.343096
-0.347526	0.353773		-0.337392	0.368592		-0.346935	0.352687		-0.344966	0.342013		-0.344972	0.343618		-0.347138	0.360824		-0.343108	0.35315		-0.341817	0.361196		-0.345065	0.352316		-0.341569	0.349732		-0.335391	0.367058		-0.340121	0.368922		-0.341917	0.361097		-0.336884	0.368533		-0.342252	0.370478		-0.342915	0.359625
-0.342837	0.365654		-0.332704	0.385192		-0.340059	0.361955		-0.337154	0.361192		-0.336847	0.365489		-0.343388	0.376677		-0.336545	0.367011		-0.337754	0.375466		-0.339128	0.361721		-0.335946	0.366261		-0.329451	0.384566		-0.33575	0.379009		-0.337542	0.378313		-0.333451	0.379833		-0.338189	0.380334		-0.339482	0.3692
-0.335651	0.372386		-0.328016	0.400655		-0.331934	0.379302		-0.331844	0.376875		-0.332161	0.381561		-0.338387	0.385338		-0.332795	0.382737		-0.332444	0.388116		-0.331626	0.378578		-0.332193	0.384891		-0.325388	0.39633		-0.32825	0.390161		-0.330981	0.38141		-0.328134	0.388967		-0.331315	0.386535		-0.333546	0.381568
-0.327838	0.386965		-0.320829	0.411045		-0.326622	0.398868		-0.327781	0.386905		-0.328724	0.39393		-0.330574	0.39862		-0.327794	0.397552		-0.324319	0.407245		-0.325378	0.395826		-0.325319	0.389776		-0.31914	0.400697		-0.320438	0.402533		-0.323168	0.396833		-0.320634	0.400848		-0.323812	0.405455		-0.326039	0.399402
-0.322525	0.407725		-0.313016	0.425585		-0.323185	0.40899		-0.320594	0.400251		-0.32216	0.401601		-0.324013	0.415592		-0.320294	0.406364		-0.317445	0.426893		-0.321002	0.413315		-0.317193	0.402903		-0.310702	0.418531		-0.315746	0.415215		-0.317229	0.413571		-0.314073	0.418887		-0.318502	0.422721		-0.320103	0.417001
-0.318151	0.421825		-0.307703	0.447903		-0.317247	0.415544		-0.312469	0.423304		-0.314348	0.421918		-0.319638	0.430878		-0.313733	0.425208		-0.313691	0.441808		-0.315377	0.418635		-0.311883	0.430721		-0.304762	0.442668		-0.311999	0.436901		-0.313166	0.434557		-0.309701	0.437108		-0.314126	0.435449		-0.315732	0.434867
-0.311587	0.429925		-0.303327	0.460771		-0.309435	0.430736		-0.307468	0.443885		-0.309036	0.443942		-0.314637	0.438063		-0.309044	0.440814		-0.309007	0.448491		-0.307878	0.435573		-0.30845	0.446261		-0.301325	0.45736		-0.305438	0.443557		-0.306918	0.448653		-0.304383	0.451808		-0.307565	0.451092		-0.310109	0.439541
-0.303463	0.445819		-0.296766	0.468657		-0.303497	0.457442		-0.303718	0.456769		-0.304661	0.455834		-0.307137	0.453525		-0.304045	0.449428		-0.301507	0.458802		-0.300689	0.455461		-0.302194	0.452871		-0.296015	0.469306		-0.297938	0.457288		-0.298792	0.465049		-0.296884	0.461834		-0.299752	0.465525		-0.302296	0.45689
-0.297526	0.46979		-0.288641	0.486248		-0.299122	0.468001		-0.29747	0.467176		-0.298723	0.458058		-0.299637	0.47443		-0.296856	0.464546		-0.294629	0.484375		-0.296315	0.469389		-0.294694	0.464871		-0.288203	0.484799		-0.292621	0.477079		-0.292544	0.478907		-0.289697	0.479837		-0.2935	0.493676		-0.295414	0.484616
-0.293463	0.481677		-0.283018	0.504213		-0.293497	0.473925		-0.289657	0.4818		-0.290598	0.47056		-0.294636	0.495307		-0.289357	0.482581		-0.289944	0.498428		-0.291314	0.479861		-0.288759	0.483106		-0.28195	0.50166		-0.288249	0.489836		-0.288481	0.496367		-0.285012	0.501928		-0.289438	0.502834		-0.291043	0.495682
-0.287213	0.490417		-0.278955	0.511889		-0.285685	0.481812		-0.28403	0.494737		-0.284347	0.498009		-0.290261	0.500684		-0.284358	0.503777		-0.285256	0.5089		-0.283815	0.493796		-0.284387	0.498304		-0.277575	0.515329		-0.281688	0.507106		-0.282542	0.504207		-0.28032	0.507679		-0.283815	0.513069		-0.286046	0.501948
-0.278775	0.512721		-0.27239	0.52112		-0.278809	0.503232		-0.279655	0.515525		-0.279974	0.517311		-0.283074	0.509855		-0.279982	0.516208		-0.278069	0.523321		-0.276315	0.518427		-0.278756	0.505695		-0.272265	0.526819		-0.273875	0.520364		-0.274416	0.520408		-0.27282	0.515447		-0.275689	0.526984		-0.278233	0.50682
-0.273151	0.541296		-0.264265	0.545969		-0.274435	0.519608		-0.273406	0.522818		-0.274347	0.522401		-0.275261	0.529699		-0.272795	0.526398		-0.270257	0.540037		-0.271627	0.541902		-0.270944	0.514346		-0.264765	0.539747		-0.267619	0.534529		-0.268168	0.539066		-0.265321	0.540095		-0.269124	0.549945		-0.270733	0.521912
-0.269713	0.553563		-0.258642	0.567099		-0.269434	0.532117		-0.265594	0.541134		-0.266535	0.533911		-0.269947	0.551086		-0.264983	0.541587		-0.264943	0.561695		-0.267251	0.546067		-0.26407	0.544566		-0.257266	0.564108		-0.26356	0.559076		-0.264418	0.555939		-0.260323	0.56187		-0.265062	0.568748		-0.266041	0.552296
-0.264088	0.550101		-0.254892	0.582503		-0.261622	0.550421		-0.259029	0.565367		-0.25966	0.557488		-0.265885	0.558698		-0.259669	0.569281		-0.26088	0.578577		-0.259751	0.554824		-0.259698	0.56356		-0.252577	0.58248		-0.257625	0.568942		-0.259417	0.559785		-0.255952	0.571681		-0.259439	0.580931		-0.26167	0.567971
-0.256275	0.573158		-0.249265	0.596536		-0.254122	0.572966		-0.25497	0.584103		-0.255598	0.581493		-0.258698	0.573647		-0.255606	0.583712		-0.254006	0.584861		-0.251939	0.571575		-0.254693	0.573267		-0.247889	0.588539		-0.249812	0.580016		-0.251917	0.569878		-0.248757	0.581178		-0.251001	0.591649		-0.253857	0.57681
-0.250025	0.597171		-0.241453	0.600987		-0.249746	0.592499		-0.249656	0.585017		-0.250286	0.596362		-0.250573	0.590389		-0.248732	0.588888		-0.245881	0.598466		-0.247253	0.599549		-0.246881	0.581717		-0.240389	0.60632		-0.243251	0.600588		-0.245356	0.591994		-0.24064	0.601172		-0.244439	0.603454		-0.246357	0.595008
-0.24565	0.607034		-0.235517	0.620644		-0.24506	0.604381		-0.241531	0.601272		-0.242161	0.598906		-0.245575	0.61054		-0.240607	0.603295		-0.240254	0.622435		-0.243503	0.609188		-0.239694	0.599912		-0.23289	0.624847		-0.239185	0.617998		-0.240668	0.609506		-0.235948	0.616556		-0.241002	0.626111		-0.241978	0.619038
-0.240338	0.619241		-0.231142	0.64128		-0.237247	0.614773		-0.234657	0.622888		-0.234974	0.619102		-0.242138	0.623195		-0.235295	0.627999		-0.236192	0.638055		-0.236627	0.623589		-0.23501	0.616387		-0.227889	0.643823		-0.233562	0.619532		-0.235667	0.628518		-0.232202	0.635075		-0.236001	0.641411		-0.237919	0.632124
-0.232525	0.628431		-0.225515	0.65535		-0.229748	0.632557		-0.230281	0.644888		-0.231222	0.639275		-0.235573	0.628633		-0.231858	0.644436		-0.22963	0.64063		-0.229127	0.638777		-0.230325	0.629042		-0.223513	0.656363		-0.225436	0.64125		-0.228167	0.645245		-0.225633	0.651727		-0.228189	0.661403		-0.231045	0.648349
-0.225338	0.653123		-0.217702	0.666964		-0.225372	0.655496		-0.22528	0.649298		-0.226848	0.656505		-0.227761	0.638299		-0.225607	0.654451		-0.221505	0.660861		-0.223815	0.655126		-0.222513	0.65033		-0.216013	0.668469		-0.218875	0.670095		-0.220667	0.6653		-0.218133	0.664115		-0.221627	0.675384		-0.223546	0.659843
-0.220963	0.670015		-0.210516	0.697146		-0.22131	0.663696		-0.217155	0.66576		-0.219349	0.672116		-0.222138	0.664878		-0.217795	0.67485		-0.215882	0.682417		-0.21944	0.672902		-0.215005	0.677325		-0.208201	0.689055		-0.215121	0.687041		-0.215666	0.680292		-0.21251	0.68536		-0.216939	0.686333		-0.218228	0.680309
-0.216275	0.687391		-0.20614	0.70949		-0.214434	0.671937		-0.209968	0.691663		-0.212473	0.685422		-0.217762	0.684316		-0.211857	0.694057		-0.212441	0.696799		-0.212877	0.682381		-0.210634	0.684078		-0.203513	0.714613		-0.210124	0.693423		-0.211291	0.692538		-0.208138	0.703858		-0.211938	0.707253		-0.213856	0.688165
-0.208463	0.69584		-0.201143	0.72702		-0.206934	0.698167		-0.205905	0.710715		-0.207473	0.703656		-0.211823	0.692782		-0.207482	0.700168		-0.206506	0.711381		-0.205064	0.698339		-0.206575	0.691752		-0.199763	0.71799		-0.202624	0.70125		-0.204104	0.699044		-0.201882	0.714378		-0.204751	0.726324		-0.207608	0.700146
-0.200963	0.717359		-0.193639	0.738155		-0.201935	0.715118		-0.20153	0.725758		-0.202785	0.715218		-0.20401	0.697214		-0.201857	0.709261		-0.198693	0.727673		-0.198814	0.721702		-0.199693	0.707413		-0.193202	0.729044		-0.19575	0.722433		-0.196291	0.72112		-0.19407	0.726246		-0.196939	0.736356		-0.199795	0.725636
-0.196275	0.735822		-0.18614	0.747691		-0.197559	0.728316		-0.194343	0.734406		-0.195911	0.72126		-0.197449	0.709964		-0.194045	0.731733		-0.192754	0.739525		-0.194753	0.732892		-0.192506	0.714123		-0.185389	0.751189		-0.191058	0.742366		-0.190981	0.745742		-0.187821	0.736288		-0.191938	0.75989		-0.193539	0.740864
-0.1919	0.751073		-0.181455	0.762225		-0.190996	0.739747		-0.187156	0.744232		-0.188099	0.746653		-0.193386	0.735571		-0.187169	0.751493		-0.188382	0.754883		-0.189126	0.741352		-0.187196	0.731289		-0.180075	0.76234		-0.186061	0.750064		-0.186919	0.75321		-0.18345	0.748551		-0.187562	0.769198		-0.18948	0.74911
-0.184401	0.759914		-0.17708	0.778325		-0.182873	0.755414		-0.182155	0.762791		-0.182785	0.764404		-0.188073	0.737973		-0.182795	0.768839		-0.183068	0.770789		-0.181003	0.765286		-0.182824	0.745698		-0.176012	0.776037		-0.178874	0.763191		-0.179732	0.758187		-0.17814	0.765403		-0.180688	0.792223		-0.183545	0.769043
-0.176588	0.78163		-0.16958	0.791478		-0.177246	0.772386		-0.177467	0.778974		-0.178411	0.780389		-0.179947	0.75591		-0.177481	0.777469		-0.175256	0.787393		-0.17444	0.774715		-0.176256	0.765916		-0.169764	0.79593		-0.171374	0.778117		-0.171606	0.782459		-0.170327	0.783708		-0.172563	0.807092		-0.175419	0.775306
-0.1719	0.805896		-0.161768	0.80617		-0.172873	0.789657		-0.170593	0.784619		-0.171848	0.798254		-0.173073	0.78137		-0.169669	0.784841		-0.168069	0.794323		-0.170377	0.788401		-0.16813	0.787236		-0.161639	0.807243		-0.166057	0.802718		-0.166605	0.800068		-0.163445	0.809115		-0.167253	0.810317		-0.168858	0.795255
-0.16815	0.80924		-0.157392	0.820481		-0.166935	0.803135		-0.16278	0.806899		-0.163723	0.805109		-0.168698	0.79692		-0.162482	0.813683		-0.163693	0.81774		-0.164752	0.796766		-0.162507	0.804776		-0.15539	0.823641		-0.161685	0.81252		-0.162856	0.80552		-0.159074	0.813312		-0.16319	0.821956		-0.165104	0.817195
-0.161275	0.816161		-0.153642	0.829813		-0.15881	0.813423		-0.157157	0.817715		-0.158098	0.816621		-0.1637	0.807778		-0.158106	0.833381		-0.158692	0.830683		-0.156627	0.811097		-0.158136	0.822207		-0.151328	0.833579		-0.155124	0.821409		-0.156603	0.821838		-0.153764	0.826282		-0.156312	0.838511		-0.159169	0.825143
-0.153775	0.832676		-0.146764	0.845474		-0.152559	0.840094		-0.153095	0.835678		-0.154035	0.834377		-0.155575	0.809788		-0.15342	0.835887		-0.151193	0.836955		-0.149753	0.829112		-0.1522	0.834977		-0.145701	0.845088		-0.146999	0.838899		-0.149104	0.831183		-0.145951	0.828908		-0.148187	0.84693		-0.150731	0.836864
-0.148462	0.852286		-0.139265	0.858866		-0.148184	0.85451		-0.14653	0.846339		-0.147472	0.844082		-0.148388	0.829841		-0.145608	0.843707		-0.143693	0.850481		-0.146001	0.851896		-0.144075	0.836263		-0.137576	0.854677		-0.141688	0.860805		-0.143481	0.848355		-0.138764	0.846543		-0.142877	0.868237		-0.144169	0.859889
-0.144088	0.865964		-0.133955	0.872152		-0.142559	0.856342		-0.138404	0.847814		-0.139349	0.860765		-0.144326	0.855213		-0.138108	0.858335		-0.139005	0.864828		-0.141315	0.863772		-0.137506	0.845859		-0.130702	0.861382		-0.137622	0.861789		-0.139105	0.852428		-0.134698	0.867122		-0.13944	0.873818		-0.140728	0.883761
-0.137526	0.877141		-0.129266	0.88563		-0.134434	0.858283		-0.132469	0.863727		-0.133722	0.879234		-0.13995	0.862083		-0.134045	0.877032		-0.134316	0.881494		-0.133815	0.873781		-0.133447	0.856715		-0.126639	0.88003		-0.130748	0.869904		-0.133166	0.864351		-0.130326	0.880611		-0.133188	0.882793		-0.135731	0.879448
-0.129713	0.880394		-0.122705	0.89905		-0.127872	0.871328		-0.128406	0.873957		-0.129972	0.874818		-0.132763	0.866641		-0.12967	0.888422		-0.126817	0.88618		-0.126626	0.886921		-0.127824	0.872706		-0.121325	0.893583		-0.122623	0.884737		-0.125044	0.875051		-0.122827	0.880862		-0.125688	0.886914		-0.128232	0.889668
-0.123463	0.892334		-0.114893	0.89555		-0.124435	0.895335		-0.122158	0.893398		-0.124347	0.884796		-0.125573	0.877243		-0.122483	0.889657		-0.119004	0.897831		-0.122253	0.900752		-0.119699	0.884117		-0.113203	0.897108		-0.117	0.891574		-0.118479	0.88609		-0.11564	0.901004		-0.119752	0.901765		-0.121357	0.907981
-0.1194	0.895043		-0.10864	0.911539		-0.119434	0.908297		-0.113719	0.902192		-0.116848	0.908653		-0.120575	0.904804		-0.115294	0.900048		-0.114629	0.914279		-0.117564	0.914309		-0.113138	0.89908		-0.106013	0.91588		-0.113559	0.896482		-0.114417	0.892784		-0.110948	0.917197		-0.115377	0.914959		-0.116978	0.923973
-0.113463	0.910427		-0.104578	0.927894		-0.111622	0.915081		-0.10778	0.912992		-0.110597	0.918333		-0.1162	0.913561		-0.110295	0.910297		-0.110879	0.92696		-0.110377	0.918711		-0.109697	0.904546		-0.102263	0.937584		-0.107623	0.912672		-0.109106	0.909106		-0.106263	0.923629		-0.10975	0.92476		-0.111981	0.917912
-0.10565	0.923296		-0.0986419	0.936577		-0.105059	0.926518		-0.104343	0.929463		-0.106222	0.923372		-0.109326	0.912994		-0.105919	0.918509		-0.104005	0.93328		-0.102565	0.919515		-0.104699	0.927997		-0.0978875	0.937729		-0.0998107	0.917437		-0.101294	0.910736		-0.099389	0.927071		-0.101938	0.940563		-0.104481	0.92088
-0.0987751	0.939089		-0.0905166	0.936167		-0.100685	0.925952		-0.09872	0.920792		-0.100597	0.923803		-0.101513	0.925796		-0.0990453	0.93633		-0.096505	0.940145		-0.0975639	0.923358		-0.096887	0.934402		-0.0903878	0.928885		-0.0938751	0.934611		-0.0941033	0.923967		-0.0915765	0.940114		-0.0950634	0.949924		-0.0969815	0.931987
-0.0947124	0.955561		-0.0842643	0.933968		-0.0956841	0.936057		-0.0909075	0.927435		-0.0930974	0.939878		-0.0958866	0.934011		-0.0912328	0.934779		-0.0911911	0.943857		-0.0931904	0.937377		-0.0903181	0.933915		-0.0832009	0.939725		-0.0894958	0.941971		-0.0897316	0.941668		-0.0862588	0.946652		-0.090688	0.951042		-0.0919767	0.946268
-0.0894004	0.957169		-0.0798927	0.950301		-0.0881844	0.946166		-0.0846552	0.945709		-0.0859105	0.952957		-0.091824	0.934067		-0.0852952	0.94292		-0.0868195	0.947132		-0.0863144	0.952735		-0.0859464	0.938434		-0.0785126	0.952163		-0.0838729	0.947486		-0.0847306	0.934754		-0.0822	0.942891		-0.0853741	0.955666		-0.087605	0.957298
-0.0812751	0.948997		-0.074266	0.957607		-0.0806847	0.959794		-0.0802798	0.959681		-0.0812223	0.951175		-0.0852627	0.942035		-0.0812326	0.954923		-0.0802544	0.968703		-0.0785019	0.958355		-0.0809492	0.940664		-0.0738282	0.953656		-0.0760604	0.951964		-0.0769181	0.941984		-0.0756387	0.960595		-0.0775616	0.963234		-0.0807309	0.970152
-0.0744001	0.962851		-0.0661407	0.965423		-0.0756836	0.962342		-0.0749697	0.968741		-0.0765359	0.955381		-0.0771374	0.956789		-0.0749822	0.964501		-0.0724419	0.963736		-0.0728771	0.96431		-0.0734495	0.94797		-0.0669503	0.968136		-0.0691863	0.958131		-0.0694184	0.955315		-0.0675134	0.968039		-0.0703747	0.964155		-0.0726056	0.972747
-0.0706503	0.977216		-0.0595794	0.965146		-0.0713101	0.973021		-0.0671572	0.965661		-0.0690362	0.959202		-0.0711979	0.955378		-0.0671697	0.967532		-0.0665062	0.979161		-0.0688145	0.956529		-0.0659498	0.970199		-0.0591378	0.963353		-0.0648071	0.973892		-0.0653557	0.96588		-0.0615701	0.968632		-0.0656903	0.975878		-0.0672956	0.969677
-0.0659629	0.981305		-0.0558296	0.969376		-0.0641213	0.971166		-0.0599665	0.970549		-0.0615346	0.97226		-0.0671352	0.963994		-0.0609193	0.976994		-0.0621308	0.985141		-0.0622513	0.96003		-0.0609449	0.972886		-0.0538277	0.966533		-0.0598098	0.973246		-0.0609803	0.962397		-0.0575113	0.975924		-0.061002	0.984069		-0.0629163	0.970416
-0.0584633	0.984512		-0.0508285	0.981445		-0.0563088	0.975627		-0.0552821	0.980418		-0.0565354	0.988392		-0.0608868	0.975668		-0.0568567	0.987043		-0.0561913	0.9782		-0.0541279	0.971316		-0.0565732	0.96654		-0.0494523	0.981522		-0.0519973	0.979405		-0.0537934	0.966082		-0.0512628	0.980394		-0.0531895	0.985933		-0.0560422	0.977768
-0.0515882	0.99478		-0.0433288	0.982127		-0.0509968	0.990555		-0.0505938	0.993105		-0.05216	0.989944		-0.0527615	0.983806		-0.0509191	0.988332		-0.0483788	0.981662		-0.0485012	0.982427		-0.0493863	0.968986		-0.042891	0.984627		-0.0448104	0.990384		-0.0466065	0.966513		-0.0428247	0.982936		-0.0456898	0.991791		-0.0479169	0.990442
-0.0469	0.996864		-0.0361419	0.989147		-0.0466214	0.987038		-0.0434069	0.98799		-0.0446603	0.988168		-0.0468258	0.98084		-0.0427938	0.987976		-0.0418175	0.997438		-0.0450642	0.983581		-0.0415738	0.971517		-0.0347657	0.987282		-0.040126	0.990712		-0.0416054	0.976411		-0.0372018	0.988505		-0.0416272	1.00295		-0.0429197	0.995656
-0.0422126	0.999504		-0.0317664	0.98759		-0.0397473	0.992542		-0.0355944	1.00101		-0.0371606	1.00854		-0.0430759	0.981064		-0.0365453	1.00253		-0.0374421	1.00307		-0.0388138	0.986162		-0.0362562	0.977366		-0.0288262	0.98828		-0.0354339	0.986602		-0.03723	0.974814		-0.033761	0.984879		-0.0375645	1.00929		-0.0394788	0.994415
-0.0350258	0.998137		-0.0267654	0.989663		-0.031622	0.995907		-0.0305933	0.995904		-0.0324723	1.00531		-0.0374493	0.984224		-0.0327955	1.00057		-0.0318192	1.00315		-0.0313141	0.990156		-0.0321973	0.991319		-0.0247635	0.995133		-0.0279342	0.988908		-0.0303559	0.982458		-0.0281381	0.989359		-0.0303776	0.998514		-0.0332303	1.00721
-0.0272133	0.991673		-0.0195785	0.998527		-0.0266228	1.00105		-0.0262179	1.00032		-0.0287225	0.995583		-0.0299496	0.997294		-0.0277944	1.00763		-0.0236939	1.01031		-0.0253765	0.991062		-0.0253232	0.986192		-0.0185151	1.00195		-0.0201217	0.990569		-0.0225434	0.99212		-0.0203256	0.99662		-0.0228741	0.997491		-0.0257306	0.997143
-0.0219003	1.00426		-0.011766	0.99671		-0.022873	1.00385		-0.019031	1.00369		-0.0218484	0.990805		-0.0233883	1.0026		-0.0199819	1.01796		-0.0171288	1.01208		-0.021001	1.0006		-0.0171979	0.992466		-0.010077	0.998406		-0.0160629	0.994052		-0.0169167	0.98548		-0.0140771	0.998616		-0.0178768	0.999713		-0.019795	1.00995
-0.0175258	1.01402		-0.00676491	0.99812		-0.0166226	1.00249		-0.0109057	0.998279		-0.0143487	0.997919		-0.0190128	0.997779		-0.0134187	1.00304		-0.013379	1.00216		-0.0153763	0.996892		-0.0118802	0.991769		-0.00445029	1.00107		-0.0119964	0.997689		-0.0125412	0.98528		-0.00969787	1.00584		-0.0135014	1.00339		-0.0154157	1.0078
-0.0109626	1.01565		-0.00238946	1		-0.00912288	1.00353		-0.00621742	0.993627		-0.00903484	1.00907		-0.013699	0.999305		-0.00873234	1.00505		-0.0086945	0.990865		-0.00756378	0.999065		-0.00844702	0.995886		-0.00101324	1		-0.00512232	1.00129		-0.00629277	1.00068		-0.004075	1.00428		-0.00694011	0.999402		-0.00948001	0.997432
-0.00283829	1.0101		0.00448463	1.00941		-0.0031853	0.994087		-0.00278038	1		-0.00465938	1.00248		-0.00619926	1.00004		-0.00373127	1		-0.00119099	1		-0.000376888	1		-0.00219854	1		0.00460962	0.997161		0.00237738	1		0.00183254	1		0.00342469	1		0.000872392	1		-0.00166751	1
0.00278743	1		0.0126099	1.01021		0.00119015	1		0.00409371	0.998523		0.0019019	1		0.000987626	1		0.00376842	1.00955		0.00568309	1.00926		0.00399857	0.99954		0.00530115	0.993329		0.0124221	1.00005		0.00768743	1.00719		0.00776821	0.993785		0.0106116	1.00557		0.00712468	1.00032		0.00489376	1.00696
0.00685008	1.00609		0.01792	1.00198		0.00681492	1.00594		0.0115934	1.00361		0.0097144	0.999087		0.00567589	0.994519		0.0112681	1.00043		0.0103714	1.00043		0.00899773	0.9907		0.0112444	0.994793		0.0183616	0.987731		0.0120667	1.00332		0.0118309	0.981333		0.0153037	1.00526		0.0111873	1.0022		0.00927304	1.00004
0.0137242	1.00081		0.0219826	1.00044		0.0146274	1.01678		0.0169073	0.997991		0.0159648	1.0063		0.0103642	1.00408		0.0159564	0.997606		0.0150558	1.00746		0.0164974	0.997946		0.0156161	0.994503		0.0227371	0.993727		0.018628	0.994		0.0177703	0.990142		0.0199881	0.990411		0.017123	1.00533		0.0145831	0.998899
0.0218495	0.998333		0.0285477	0.998319		0.0215034	1.00844		0.0212827	0.991204		0.0200274	1.00787		0.0178638	1.00588		0.0206427	1.001		0.0222465	1.01106		0.0236862	0.993787		0.0215518	0.988193		0.0283599	0.991735		0.0264405	0.990348		0.0262085	0.994301		0.0274878	0.991766		0.0252483	1.00822		0.0223956	1.0007
0.0271624	1.00353		0.036673	0.996527		0.0258789	1.00709		0.0275312	0.979271		0.025965	1.00936		0.0256763	0.997899		0.0275187	1.00415		0.030059	0.989004		0.0283726	0.994605		0.0293643	0.989417		0.0358596	1.00068		0.0323762	1.00266		0.0324569	0.98669		0.0349875	0.994758		0.0318134	0.998455		0.0295825	1.00177
0.0309122	1.00032		0.0422959	0.978885		0.030878	0.997528		0.0356565	0.992371		0.0337775	1.00049		0.0303646	0.987584		0.0353312	1.00443		0.0350563	0.987417		0.0333736	0.988496		0.0362383	0.991516		0.0430465	0.989861		0.0364426	0.996424		0.035894	0.979835		0.0399924	0.98411		0.0358722	1.00187		0.0339541	1.00216
0.036537	1.00116		0.0457329	0.983398		0.0390033	0.990544		0.041905	0.987179		0.0403388	0.98318		0.0347401	0.995457		0.0406432	0.994577		0.0394317	0.985593		0.0408733	0.98803		0.0406176	0.993104		0.047422	0.975618		0.0426911	0.984026		0.0412078	0.98453		0.044364	0.981221		0.0418117	0.989251		0.038959	0.997283
0.0443495	1.00263		0.0516724	0.983156		0.0461902	0.986422		0.0459676	0.976492		0.0444014	0.994772		0.041927	0.997147		0.0447058	0.997021		0.0463058	0.976085		0.048373	0.985728		0.0456149	0.991025		0.052423	0.977924		0.0508164	0.979093		0.0487075	0.980413		0.0515509	0.976286		0.049937	0.978989		0.0464587	1.00002
0.0505999	0.994127		0.0594849	0.983047		0.0505657	0.987906		0.0515943	0.988326		0.0500281	0.994593		0.0500523	0.990406		0.0518927	0.987495		0.0544311	0.995393		0.0527485	0.983125		0.0534274	0.977749		0.0599227	0.975302		0.0570649	0.97835		0.0552688	0.970451		0.0593634	0.985107		0.0561855	0.983594		0.0539584	0.994489
0.0549744	0.998584		0.0654206	0.967461		0.0555648	0.986098		0.0594068	0.989158		0.0581515	0.989497		0.0547367	0.976184		0.060018	0.972824		0.059745	0.982275		0.0568111	0.974732		0.0606143	0.961803		0.0677352	0.974471		0.0611237	0.97751		0.0596443	0.960494		0.0640479	0.97387		0.0596225	0.987324		0.05833	0.988981
0.0602873	0.987013		0.0694833	0.962646		0.0633774	0.976943		0.0662809	0.98007		0.0647147	0.977666		0.0584866	0.96086		0.0650172	0.971454		0.0638076	0.971305		0.0636852	0.971717		0.0649935	0.95841		0.0724235	0.961009		0.0667542	0.964685		0.0646453	0.964758		0.0681143	0.971289		0.0649364	0.977362		0.0623965	0.9776
0.0680998	0.984489		0.0754227	0.961043		0.0705661	0.970643		0.0706564	0.963153		0.0684646	0.974285		0.0650517	0.960254		0.0684562	0.963755		0.0706817	0.981257		0.0711849	0.977375		0.0699908	0.958308		0.076799	0.955553		0.0751923	0.958046		0.0724578	0.968034		0.0746756	0.959629		0.0724361	0.962447		0.0695834	0.974257
0.0752867	0.968983		0.0832352	0.958669		0.0746288	0.965034		0.0759702	0.962279		0.0734656	0.956548		0.0728642	0.962031		0.0747046	0.953793		0.078807	0.978643		0.0764988	0.973005		0.0778033	0.951364		0.0842986	0.94695		0.0817536	0.960399		0.0796447	0.950757		0.0821753	0.950485		0.0789974	0.95927		0.0770831	0.972867
0.0796622	0.957439		0.0901093	0.962258		0.0786895	0.960977		0.0840955	0.958845		0.0806525	0.957481		0.0781742	0.966751		0.0825171	0.958048		0.0844337	0.964864		0.0805615	0.956244		0.085303	0.951558		0.0921111	0.940871		0.0851868	0.949		0.084333	0.951874		0.0874854	0.947678		0.0836857	0.94647		0.0820803	0.971426
0.0846623	0.959937		0.0944848	0.953341		0.0858783	0.959283		0.0909696	0.948262		0.0875266	0.961762		0.0825497	0.955599		0.0881438	0.956181		0.0878707	0.952697		0.0871227	0.952274		0.0890566	0.944481		0.0964866	0.932793		0.0901917	0.949343		0.0890213	0.939779		0.0918646	0.938437		0.0886867	0.948218		0.0864596	0.956965
0.092162	0.942784		0.099482	0.938146		0.093378	0.953414		0.0947195	0.938937		0.0922149	0.946986		0.088802	0.949861		0.0925174	0.95581		0.0938064	0.955665		0.095248	0.94974		0.0931155	0.93279		0.100549	0.92104		0.0976914	0.937152		0.096521	0.935809		0.0984259	0.925331		0.0961864	0.944121		0.0930209	0.953018
0.0996617	0.940015		0.107295	0.926326		0.0980663	0.94475		0.0994077	0.935632		0.0969031	0.935041		0.0966145	0.941726		0.0984549	0.939028		0.101619	0.946642		0.101186	0.928951		0.100302	0.935263		0.107423	0.924318		0.104565	0.933078		0.104021	0.919266		0.106238	0.928172		0.103686	0.927613		0.101146	0.933972
0.10435	0.931669		0.114798	0.921804		0.102753	0.934456		0.106907	0.929753		0.10409	0.927432		0.102863	0.928085		0.106267	0.929761		0.107558	0.928509		0.105248	0.927804		0.107802	0.926056		0.114923	0.914612		0.108937	0.916726		0.109022	0.911951		0.112487	0.913807		0.108687	0.919424		0.106769	0.935836
0.109037	0.931943		0.11917	0.906424		0.109629	0.932148		0.113782	0.90837		0.111903	0.929106		0.107238	0.923117		0.113143	0.917356		0.111621	0.920515		0.111186	0.92187		0.112807	0.915303		0.120237	0.892579		0.113942	0.905695		0.113706	0.901012		0.116553	0.901429		0.113375	0.912608		0.110836	0.921739
0.116537	0.915872		0.123858	0.900547		0.117441	0.921212		0.11847	0.899242		0.117214	0.913361		0.112865	0.91664		0.117206	0.900236		0.117244	0.914742		0.119311	0.913492		0.117179	0.906122		0.1243	0.886316		0.121442	0.900911		0.120893	0.889393		0.122176	0.896073		0.12025	0.899193		0.117084	0.908305
0.124038	0.905621		0.131983	0.891081		0.123066	0.900916		0.123158	0.892922		0.12159	0.899823		0.120678	0.90632		0.122518	0.900158		0.125369	0.908075		0.12556	0.899569		0.12374	0.884203		0.130861	0.882182		0.128941	0.878319		0.128706	0.884526		0.130302	0.895661		0.128062	0.877945		0.125209	0.900261
0.128412	0.89463		0.139483	0.876695		0.127129	0.886793		0.130345	0.88206		0.128153	0.904385		0.127552	0.889941		0.130331	0.891671		0.132243	0.888346		0.129622	0.887983		0.131865	0.869142		0.138986	0.868865		0.133939	0.875843		0.133394	0.873683		0.136863	0.880237		0.133376	0.868043		0.131145	0.891029
0.132475	0.885926		0.143546	0.860842		0.133377	0.885301		0.138157	0.866161		0.136277	0.886593		0.131614	0.879627		0.137517	0.87644		0.136619	0.870569		0.135249	0.872779		0.137801	0.86072		0.144922	0.855388		0.138318	0.870466		0.137144	0.867638		0.140929	0.860832		0.137748	0.863342		0.135204	0.875136
0.13935	0.872304		0.147608	0.854755		0.141502	0.863518		0.143467	0.860536		0.141901	0.860295		0.136924	0.870086		0.141893	0.858156		0.14162	0.865812		0.143372	0.85788		0.141867	0.854226		0.148984	0.841041		0.145192	0.856593		0.143709	0.843639		0.146239	0.843334		0.144625	0.854236		0.141147	0.875138
0.146849	0.864162		0.154795	0.835409		0.147753	0.840338		0.147843	0.84061		0.145653	0.849939		0.14505	0.865973		0.146892	0.85335		0.14912	0.85615		0.149936	0.839349		0.148116	0.84041		0.154611	0.833208		0.153317	0.842847		0.151208	0.831294		0.154365	0.828366		0.152751	0.842384		0.149272	0.858037
0.152162	0.84527		0.161982	0.823491		0.151815	0.835169		0.154408	0.831137		0.152527	0.843023		0.152237	0.857177		0.154705	0.847468		0.156619	0.836123		0.153685	0.831629		0.156241	0.82677		0.162736	0.825576		0.158627	0.810362		0.156831	0.829906		0.161239	0.811843		0.157748	0.824534		0.155521	0.83305
0.156537	0.819567		0.167296	0.805104		0.157753	0.821113		0.162533	0.819728		0.160965	0.823547		0.15599	0.835016		0.161893	0.833545		0.160995	0.821658		0.158686	0.819425		0.162177	0.805488		0.169298	0.807938		0.162686	0.805779		0.161207	0.817796		0.164992	0.79413		0.161498	0.812119		0.159267	0.822103
0.1631	0.82256		0.171671	0.78963		0.165878	0.805739		0.168156	0.795049		0.166277	0.810595		0.160362	0.814209		0.165956	0.819035		0.165683	0.819928		0.166186	0.804672		0.166243	0.795241		0.17336	0.782106		0.169568	0.795953		0.167146	0.805426		0.169677	0.783734		0.16775	0.796115		0.164272	0.816728
0.171224	0.807417		0.178233	0.779198		0.172129	0.792022		0.172219	0.777839		0.169714	0.791367		0.167862	0.813046		0.17033	0.79879		0.173495	0.793438		0.17306	0.785014		0.172179	0.773662		0.178987	0.77484		0.177693	0.774155		0.175272	0.784127		0.177177	0.765302		0.17525	0.774923		0.172084	0.799998
0.176849	0.785572		0.186045	0.756878		0.175566	0.782335		0.17878	0.774533		0.175652	0.786244		0.175052	0.794606		0.177206	0.780327		0.181308	0.766928		0.177436	0.767896		0.180304	0.763299		0.187425	0.762546		0.18269	0.753805		0.18152	0.772395		0.184363	0.762251		0.180873	0.761625		0.178646	0.783196
0.181225	0.765793		0.191985	0.738949		0.180878	0.774468		0.187218	0.750411		0.183464	0.771261		0.179737	0.781115		0.184392	0.760953		0.185371	0.753396		0.182435	0.758562		0.186553	0.745301		0.193986	0.732512		0.186124	0.74352		0.185896	0.747521		0.188743	0.745531		0.185248	0.74685		0.183017	0.767285
0.187162	0.758464		0.19636	0.729048		0.18869	0.759455		0.192845	0.735971		0.189402	0.746962		0.184425	0.768058		0.189393	0.74978		0.189433	0.746744		0.189936	0.758689		0.190306	0.722944		0.197423	0.712446		0.19238	0.737753		0.191206	0.740181		0.19374	0.729972		0.191188	0.740248		0.188022	0.763261
0.194975	0.745006		0.202296	0.714483		0.195253	0.738113		0.196595	0.728154		0.193465	0.732331		0.191612	0.755015		0.193767	0.738748		0.196307	0.73627		0.197436	0.743109		0.195304	0.717785		0.202425	0.709555		0.200192	0.719583		0.199331	0.72523		0.200927	0.711047		0.199313	0.723372		0.195835	0.747984
0.201537	0.716602		0.210421	0.696702		0.199629	0.718549		0.202218	0.705627		0.199089	0.718354		0.199424	0.727169		0.200643	0.723318		0.203807	0.720576		0.202435	0.71095		0.203116	0.711561		0.209924	0.694682		0.205815	0.706466		0.206209	0.699044		0.208427	0.684865		0.205874	0.70036		0.203334	0.728184
0.2056	0.698506		0.21667	0.678688		0.204941	0.703394		0.21003	0.696161		0.206902	0.703666		0.204425	0.707911		0.208768	0.701017		0.208808	0.706288		0.206811	0.690113		0.209677	0.694579		0.216798	0.674555		0.210187	0.688167		0.210584	0.686711		0.213737	0.668247		0.209937	0.687044		0.208019	0.709185
0.211224	0.694512		0.220732	0.655488		0.21244	0.682684		0.216282	0.679379		0.214091	0.684009		0.208801	0.698066		0.214393	0.678187		0.213184	0.689106		0.213685	0.681798		0.214057	0.673672		0.221487	0.653882		0.21613	0.679195		0.215581	0.668226		0.218116	0.664072		0.215251	0.67361		0.212398	0.691537
0.219663	0.680866		0.226672	0.650988		0.219627	0.664589		0.220658	0.66259		0.218464	0.6662		0.215362	0.68406		0.218456	0.665852		0.220058	0.673716		0.221497	0.671028		0.219054	0.651689		0.226175	0.634194		0.223943	0.668487		0.223707	0.657545		0.224677	0.646329		0.223372	0.657		0.219585	0.679871
0.226225	0.654652		0.234797	0.630955		0.224628	0.641948		0.225968	0.652341		0.223465	0.659196		0.223487	0.670757		0.224706	0.652577		0.22787	0.654563		0.226811	0.646608		0.226554	0.639596		0.233362	0.622147		0.230504	0.643669		0.230894	0.641517		0.23249	0.623765		0.230563	0.634357		0.227397	0.652851
0.229662	0.640029		0.241045	0.607406		0.229004	0.630826		0.23378	0.638127		0.231278	0.643888		0.229427	0.658891		0.23283	0.643259		0.233806	0.640397		0.231185	0.630547		0.234053	0.633391		0.241174	0.607965		0.234876	0.616732		0.234644	0.623242		0.238112	0.598273		0.234938	0.611186		0.232707	0.633508
0.234975	0.627443		0.244795	0.590967		0.236504	0.621451		0.240971	0.605092		0.238465	0.618342		0.23349	0.643145		0.238767	0.61163		0.238181	0.621505		0.238061	0.616357		0.239051	0.60169		0.246172	0.590297		0.240193	0.595538		0.239332	0.615526		0.242179	0.592566		0.239623	0.601964		0.236766	0.626089
0.242474	0.610481		0.249796	0.581863		0.244316	0.600677		0.245656	0.583621		0.243153	0.592604		0.240051	0.619213		0.24283	0.593798		0.244121	0.613673		0.246186	0.591958		0.24343	0.589202		0.250547	0.581773		0.248006	0.586105		0.246519	0.600935		0.24874	0.575313		0.247435	0.598549		0.243961	0.612993
0.249349	0.596644		0.257609	0.569766		0.249315	0.583349		0.250344	0.580852		0.247839	0.579491		0.248176	0.607067		0.24908	0.590341		0.252246	0.589388		0.251185	0.572927		0.250617	0.582613		0.257425	0.568242		0.255193	0.571666		0.253706	0.584174		0.257178	0.566277		0.254935	0.571659		0.251773	0.595672
0.253725	0.57605		0.26417	0.550947		0.253378	0.570375		0.258156	0.562267		0.255652	0.569614		0.253799	0.583168		0.257205	0.573111		0.258495	0.573802		0.254935	0.562214		0.258429	0.561902		0.265237	0.54777		0.259564	0.55264		0.258394	0.560333		0.262801	0.541806		0.258998	0.563852		0.256771	0.576493
0.258725	0.56518		0.268858	0.530681		0.260565	0.563934		0.265656	0.545263		0.263151	0.554968		0.257553	0.570282		0.263143	0.544435		0.262557	0.558439		0.261185	0.554197		0.263739	0.542438		0.27086	0.521328		0.264249	0.540411		0.263082	0.543795		0.266242	0.53645		0.263373	0.552042		0.260517	0.554919
0.266225	0.550849		0.273859	0.520768		0.26869	0.540988		0.270344	0.532497		0.267214	0.535813		0.263176	0.567544		0.266893	0.526437		0.268493	0.543353		0.268685	0.53767		0.267806	0.527749		0.274923	0.508179		0.272061	0.53175		0.269956	0.534619		0.271865	0.526459		0.27056	0.538455		0.266773	0.538959
0.274037	0.526092		0.281046	0.505947		0.273691	0.520379		0.27472	0.513097		0.271277	0.518433		0.270988	0.549993		0.272205	0.52121		0.276618	0.524268		0.274623	0.520305		0.274993	0.516099		0.281484	0.500189		0.279561	0.503786		0.277769	0.513392		0.279677	0.505345		0.277751	0.522527		0.274585	0.521861
0.279037	0.509721		0.288546	0.488737		0.277441	0.50989		0.282219	0.497511		0.278466	0.506607		0.277237	0.525675		0.280017	0.51197		0.283183	0.509163		0.278998	0.504444		0.283118	0.499635		0.289922	0.478346		0.283627	0.479838		0.283395	0.484247		0.285926	0.484855		0.282435	0.50528		0.280208	0.504399
0.2831	0.495275		0.293547	0.471143		0.283691	0.494376		0.290032	0.483863		0.285652	0.494345		0.281612	0.514354		0.286268	0.493415		0.28662	0.489019		0.284936	0.491043		0.288115	0.472486		0.295236	0.465174		0.287686	0.476671		0.287458	0.473655		0.290305	0.471219		0.287123	0.495099		0.28458	0.496136
0.290287	0.486976		0.298235	0.454663		0.291504	0.477137		0.294407	0.471122		0.290652	0.471054		0.286926	0.500435		0.290643	0.481685		0.291621	0.480724		0.292748	0.476284		0.291556	0.459768		0.298673	0.446956		0.294881	0.467958		0.294019	0.472392		0.295615	0.457307		0.293998	0.4869		0.290523	0.485895
0.298099	0.467192		0.305422	0.448456		0.297129	0.463666		0.298157	0.456862		0.29534	0.457118		0.294738	0.483067		0.295955	0.470453		0.299434	0.470399		0.299311	0.462836		0.298117	0.449923		0.304922	0.435802		0.30238	0.452408		0.302145	0.460474		0.303428	0.445007		0.302123	0.467039		0.298648	0.464378
0.303412	0.442428		0.313235	0.430834		0.301502	0.453334		0.305031	0.450518		0.301903	0.449787		0.301925	0.46793		0.303455	0.457698		0.305995	0.447669		0.303685	0.439462		0.30593	0.443941		0.312425	0.427862		0.307378	0.437746		0.308084	0.43804		0.310615	0.432636		0.30775	0.44314		0.30521	0.444574
0.307787	0.431533		0.318545	0.415372		0.30744	0.442085		0.312531	0.431553		0.309716	0.442201		0.306614	0.442746		0.310955	0.438694		0.310371	0.428836		0.308999	0.428543		0.31124	0.418849		0.318361	0.402614		0.311749	0.426062		0.311834	0.421887		0.314986	0.419849		0.311812	0.442859		0.309268	0.435172
0.314662	0.426415		0.322607	0.407239		0.315252	0.425476		0.317845	0.410013		0.315653	0.417956		0.311302	0.427843		0.315643	0.415746		0.315368	0.425057		0.316811	0.42009		0.315619	0.40181		0.322736	0.390221		0.318623	0.410294		0.318395	0.410237		0.319991	0.40256		0.318061	0.432767		0.314586	0.432568
0.3231	0.409657		0.329798	0.390416		0.321815	0.399427		0.32222	0.392899		0.320027	0.399025		0.319114	0.422092		0.320331	0.399697		0.322871	0.411685		0.323998	0.39902		0.321555	0.397695		0.328359	0.38448		0.326436	0.396637		0.326833	0.39866		0.327804	0.3905		0.326186	0.412979		0.322399	0.417607
0.3281	0.389979		0.337611	0.371133		0.326191	0.380055		0.328782	0.383669		0.325964	0.394461		0.326614	0.41349		0.327831	0.388525		0.330371	0.391891		0.328374	0.38331		0.32968	0.380156		0.336172	0.368086		0.332379	0.377666		0.332456	0.378502		0.334991	0.372535		0.332125	0.400903		0.329586	0.395579
0.33185	0.380445		0.342608	0.350788		0.331503	0.372849		0.336907	0.374774		0.333777	0.375035		0.331302	0.392425		0.33533	0.375625		0.335368	0.379005		0.33306	0.372385		0.335929	0.367791		0.34305	0.354029		0.336438	0.366263		0.335893	0.363409		0.339675	0.35325		0.336188	0.390264		0.333957	0.376628
0.338099	0.36938		0.346358	0.339599		0.339315	0.36685		0.343155	0.352627		0.34034	0.358439		0.335678	0.379951		0.34033	0.357653		0.339744	0.366633		0.340873	0.356947		0.3403	0.349598		0.347425	0.341318		0.342687	0.351514		0.34152	0.36074		0.344367	0.353137		0.342437	0.380788		0.338954	0.366382
0.3456	0.353877		0.35261	0.334023		0.346502	0.353375		0.347218	0.337069		0.344403	0.346446		0.343177	0.371661		0.344705	0.347999		0.346931	0.357921		0.348372	0.335899		0.345618	0.338099		0.352422	0.328316		0.350812	0.33727		0.349332	0.3479		0.351867	0.338472		0.350562	0.369443		0.346767	0.355539
0.351538	0.341821		0.360423	0.319087		0.350565	0.33308		0.352845	0.32887		0.350027	0.340873		0.35099	0.359609		0.351894	0.343865		0.354743	0.341228		0.352435	0.324624		0.353743	0.329335		0.360235	0.316843		0.356755	0.322677		0.355581	0.326454		0.359679	0.321341		0.35681	0.346977		0.353954	0.335381
0.355912	0.322534		0.366045	0.305065		0.355566	0.323494		0.36097	0.313747		0.358465	0.322793		0.355674	0.342613		0.360017	0.318534		0.360057	0.322995		0.35681	0.322508		0.360617	0.309592		0.367422	0.292957		0.360814	0.304144		0.359956	0.315365		0.364051	0.302484		0.360247	0.338826		0.35802	0.321189
0.361537	0.314074		0.370421	0.282987		0.363691	0.312119		0.367219	0.29793		0.365027	0.304348		0.359424	0.322909		0.364706	0.298471		0.36412	0.308527		0.363997	0.312854		0.364989	0.296559		0.37211	0.27944		0.367062	0.299689		0.36527	0.303218		0.367805	0.28866		0.365561	0.33373		0.362392	0.316921
0.369349	0.303755		0.37636	0.27315		0.370878	0.290475		0.371594	0.283256		0.368464	0.291974		0.366302	0.310047		0.368143	0.285774		0.371307	0.296024		0.371186	0.294176		0.369994	0.292732		0.377111	0.265824		0.375188	0.282453		0.373083	0.289208		0.374679	0.289409		0.373374	0.321874		0.369579	0.301504
0.376224	0.289843		0.384173	0.268994		0.374941	0.273148		0.377221	0.274301		0.373465	0.28138		0.373802	0.296083		0.374706	0.276327		0.379432	0.279855		0.376185	0.270689		0.377806	0.279057		0.384611	0.259791		0.381436	0.262192		0.38027	0.275665		0.382178	0.274205		0.379622	0.306355		0.377086	0.282646
0.3806	0.273568		0.390734	0.25243		0.379316	0.271215		0.385346	0.259953		0.380965	0.270346		0.379112	0.28061		0.382518	0.267294		0.384433	0.264901		0.380561	0.264499		0.385306	0.264157		0.39211	0.243916		0.384877	0.251591		0.384645	0.261005		0.387488	0.256092		0.383998	0.289808		0.381771	0.2667
0.385912	0.261586		0.39511	0.233449		0.386503	0.259099		0.391907	0.247175		0.387841	0.253663		0.383487	0.270621		0.38783	0.252891		0.388183	0.250277		0.387435	0.255085		0.389052	0.246609		0.396486	0.227424		0.390187	0.247485		0.389646	0.250886		0.391868	0.246913		0.389312	0.28198		0.386455	0.256361
0.393724	0.253477		0.40042	0.221356		0.39369	0.241609		0.395657	0.231997		0.392214	0.242134		0.390052	0.264495		0.392206	0.237131		0.394431	0.244639		0.39556	0.236702		0.393431	0.232382		0.400548	0.216277		0.397687	0.23772		0.397146	0.238804		0.398429	0.228573		0.396811	0.271408		0.393329	0.240462
0.400912	0.230053		0.408232	0.217627		0.398691	0.224658		0.400658	0.220131		0.397215	0.236789		0.398178	0.248214		0.398456	0.2272		0.401931	0.23316		0.401185	0.222583		0.400618	0.222066		0.407423	0.210019		0.404256	0.221113		0.404646	0.222605		0.406241	0.216261		0.404311	0.250684		0.401142	0.231547
0.405288	0.215711		0.415423	0.199515		0.403065	0.213392		0.408158	0.210724		0.404715	0.217941		0.404113	0.23188		0.406269	0.223003		0.40787	0.216792		0.405248	0.215202		0.407805	0.207806		0.414922	0.196824		0.408627	0.204932		0.409647	0.20179		0.41249	0.199497		0.408999	0.237198		0.406772	0.217669
0.410287	0.205072		0.419795	0.181351		0.410253	0.208756		0.415032	0.195217		0.412215	0.202312		0.408176	0.219102		0.412517	0.205596		0.412246	0.20368		0.411498	0.201689		0.41249	0.194696		0.420236	0.179795		0.413625	0.196628		0.414018	0.191975		0.416549	0.193905		0.413687	0.225813		0.410831	0.205861
0.418099	0.19433		0.424796	0.174455		0.418066	0.192004		0.41972	0.183026		0.417216	0.188933		0.414112	0.2101		0.416892	0.185692		0.417869	0.187912		0.419623	0.189562		0.417182	0.185276		0.424612	0.166044		0.421124	0.188204		0.421522	0.183498		0.422492	0.182051		0.420874	0.215089		0.417079	0.194606
0.425287	0.179916		0.432608	0.16799		0.423378	0.173964		0.424408	0.171633		0.421589	0.178739		0.422237	0.201409		0.422517	0.180174		0.425681	0.178655		0.425561	0.174258		0.424056	0.174699		0.431173	0.158814		0.428624	0.167998		0.429334	0.1717		0.430617	0.172338		0.428687	0.199804		0.425205	0.182965
0.429663	0.165822		0.440108	0.152229		0.427441	0.16445		0.431595	0.158962		0.428465	0.168518		0.428489	0.1851		0.43033	0.173337		0.432555	0.16259		0.429623	0.162904		0.432181	0.161034		0.438985	0.147542		0.433629	0.150745		0.433706	0.154921		0.436866	0.158808		0.433688	0.185209		0.431148	0.165077
0.433724	0.157551		0.44417	0.141275		0.434004	0.159354		0.439408	0.148104		0.43659	0.152632		0.432865	0.168524		0.437206	0.155144		0.436931	0.152693		0.435874	0.155027		0.437804	0.148792		0.444925	0.135295		0.438313	0.144584		0.437769	0.146072		0.440925	0.138267		0.438063	0.174041		0.435207	0.155608
0.440912	0.148562		0.448233	0.135923		0.442127	0.147975		0.444718	0.135887		0.441902	0.137103		0.438488	0.162748		0.441581	0.139598		0.442245	0.144691		0.443997	0.144609		0.441863	0.133699		0.448988	0.124048		0.4455	0.135853		0.444334	0.142462		0.446555	0.134276		0.44525	0.165641		0.441143	0.149184
0.4481	0.130303		0.45542	0.125791		0.448065	0.132375		0.448781	0.126072		0.445965	0.131998		0.446613	0.151667		0.446893	0.131498		0.450057	0.135201		0.449935	0.129058		0.448119	0.130056		0.454923	0.115373		0.453313	0.122381		0.451833	0.127324		0.454986	0.125285		0.453376	0.155742		0.449581	0.138379
0.4531	0.120884		0.46292	0.11035		0.452127	0.119387		0.455967	0.120642		0.452839	0.12678		0.453174	0.133884		0.454706	0.124443		0.457244	0.122899		0.453685	0.115254		0.456244	0.118672		0.463048	0.106698		0.458318	0.10982		0.457143	0.113671		0.461555	0.109168		0.45806	0.143731		0.455829	0.121334
0.457475	0.114213		0.467608	0.0976167		0.458378	0.111735		0.464093	0.107031		0.461277	0.115314		0.456924	0.120283		0.461893	0.113043		0.46162	0.110492		0.458999	0.112715		0.46218	0.105245		0.469297	0.0947059		0.462376	0.103353		0.461519	0.107472		0.464988	0.101018		0.46181	0.131957		0.45927	0.111335
0.46435	0.104599		0.472296	0.093087		0.466816	0.100647		0.469407	0.0947135		0.466276	0.0986094		0.461925	0.117412		0.465642	0.098215		0.466308	0.102979		0.466498	0.105353		0.466239	0.095432		0.47336	0.0839238		0.469563	0.0972975		0.467771	0.101854		0.469993	0.0966154		0.468062	0.126945		0.46458	0.105952
0.472162	0.0957143		0.47917	0.0875612		0.472753	0.0878517		0.473469	0.0883393		0.470026	0.0920028		0.469425	0.109106		0.470018	0.0915016		0.47412	0.0960149		0.473061	0.0907286		0.472495	0.0907935		0.479299	0.0813566		0.477689	0.0882553		0.475584	0.0913746		0.477492	0.0909735		0.475875	0.118592		0.472393	0.0959093
0.4781	0.0847323		0.486983	0.0791592		0.476191	0.0825541		0.480343	0.0830429		0.476277	0.0843186		0.476303	0.0965582		0.477518	0.0879083		0.48162	0.085355		0.477748	0.0819096		0.480925	0.0817965		0.487424	0.0742664		0.482686	0.0778529		0.481832	0.0797595		0.484366	0.0784865		0.481498	0.107011		0.478649	0.0870182
0.482162	0.0748118		0.492922	0.0688064		0.481815	0.079817		0.488469	0.0772166		0.483776	0.0774476		0.480674	0.0890955		0.484394	0.0790108		0.485683	0.07658		0.482749	0.0776075		0.486869	0.0729218		0.493986	0.0612223		0.486127	0.0676859		0.486208	0.0720317		0.489051	0.0696245		0.48556	0.101795		0.483333	0.0807472
0.488412	0.0689052		0.496985	0.0574484		0.489315	0.0685839		0.493783	0.065926		0.489714	0.0692637		0.485675	0.0834809		0.489393	0.0676349		0.489745	0.0711216		0.490249	0.071821		0.490302	0.0659204		0.497423	0.0558517		0.492688	0.0664836		0.491834	0.0695623		0.494048	0.0638203		0.491812	0.0967935		0.48833	0.0743977
0.496537	0.0627403		0.503233	0.0537478		0.495878	0.0616153		0.49722	0.058051		0.493777	0.0626833		0.492862	0.0760839		0.494081	0.0622333		0.496932	0.0650134		0.497748	0.0606522		0.495932	0.0609207		0.502424	0.0539319		0.500188	0.0587985		0.499956	0.0624133		0.501243	0.0587538		0.499938	0.0926492		0.49583	0.0680306
0.502475	0.0550893		0.511359	0.0497603		0.500254	0.0543742		0.503468	0.0565832		0.499714	0.0570882		0.500675	0.0672473		0.500955	0.0592654		0.504432	0.0568233		0.502436	0.0543148		0.503432	0.0533238		0.510236	0.0490646		0.505818	0.0516454		0.506521	0.0525846		0.509055	0.0525546		0.506186	0.0823444		0.50333	0.060895
0.506537	0.0473918		0.517607	0.0424633		0.505566	0.0499149		0.511281	0.0502499		0.507527	0.0533183		0.505676	0.0592476		0.508768	0.0561681		0.509433	0.0500822		0.507123	0.0487801		0.509993	0.0473852		0.516798	0.0429791		0.51019	0.0461429		0.510583	0.0474033		0.514052	0.0432926		0.510249	0.0726084		0.508022	0.0525426
0.512787	0.0444479		0.52167	0.0382584		0.513065	0.047647		0.51722	0.0430064		0.514403	0.047075		0.510051	0.0537235		0.514392	0.0473168		0.513808	0.0435341		0.51431	0.0468052		0.514365	0.0444801		0.521486	0.0361685		0.516126	0.0419991		0.516206	0.0434995		0.518111	0.0411825		0.515876	0.0692344		0.512706	0.0461354
0.520912	0.0406729		0.527609	0.0357823		0.520252	0.0417353		0.521283	0.037465		0.518465	0.0392942		0.516925	0.0495596		0.518455	0.0422515		0.520682	0.0396629		0.522122	0.0400934		0.519675	0.0383996		0.526487	0.033139		0.524251	0.0392415		0.524332	0.0396688		0.524985	0.0377937		0.523688	0.0638761		0.520206	0.0450577
0.52685	0.0347453		0.535735	0.0307622		0.52494	0.0356858		0.527218	0.0359374		0.523777	0.0358109		0.524738	0.0433618		0.525018	0.0363911		0.528808	0.0373655		0.527123	0.0347543		0.527182	0.035648		0.533987	0.0306413		0.530812	0.0319135		0.531206	0.0329205		0.533111	0.0339591		0.530562	0.0582592		0.527706	0.0375758
0.530599	0.0304534		0.541983	0.0276459		0.529629	0.0329415		0.535031	0.0321992		0.53159	0.0340374		0.530052	0.0385936		0.533144	0.0312546		0.534431	0.0344714		0.531186	0.032823		0.534369	0.0330331		0.541486	0.0277149		0.534879	0.0285906		0.534956	0.0297173		0.538428	0.0278591		0.534938	0.0561202		0.532711	0.0318968
0.535912	0.029334		0.54542	0.0258366		0.537128	0.0298575		0.541905	0.0270958		0.538777	0.0296669		0.534427	0.0341893		0.538768	0.0281595		0.538493	0.0311266		0.538373	0.0283347		0.539054	0.0269664		0.546175	0.0246904		0.540189	0.0275109		0.539644	0.029327		0.542487	0.0253011		0.540248	0.0532483		0.537082	0.0288043
0.543412	0.027142		0.550734	0.0243367		0.544941	0.0261719		0.54628	0.025715		0.543465	0.0243854		0.541301	0.0324752		0.542831	0.0267261		0.544746	0.0275702		0.546498	0.0253266		0.543738	0.023473		0.550859	0.0224437		0.548314	0.0255667		0.547144	0.025323		0.549361	0.0244103		0.548373	0.0539689		0.544269	0.0264435
0.549974	0.0232548		0.558547	0.0230959		0.549627	0.0234031		0.551282	0.0241575		0.548151	0.0223669		0.549427	0.0273608		0.549392	0.0231872		0.552871	0.0235911		0.551497	0.0224845		0.551238	0.0237962		0.557737	0.021199		0.555188	0.0202853		0.554021	0.0216393		0.557487	0.0215066		0.555251	0.0505406		0.552394	0.0240556
0.554663	0.0199063		0.565108	0.0210952		0.554003	0.0190983		0.559094	0.0230443		0.555964	0.0203654		0.554737	0.0244584		0.557518	0.021286		0.558807	0.0204314		0.554936	0.0217287		0.558737	0.0219783		0.565549	0.0183224		0.559567	0.0180104		0.558706	0.0189888		0.562804	0.0168735		0.55931	0.0459301		0.557079	0.02042
0.559662	0.0171525		0.569483	0.016372		0.561502	0.0170642		0.566281	0.0193483		0.563465	0.0183141		0.558178	0.0224027		0.563142	0.0192791		0.562869	0.0186424		0.561498	0.0192224		0.563742	0.0176675		0.570859	0.016072		0.564565	0.0171575		0.563394	0.0174003		0.566238	0.0155602		0.563685	0.0434711		0.56052	0.0176157
0.567162	0.0169937		0.574484	0.0155163		0.569315	0.0163143		0.570969	0.0163558		0.567528	0.0161282		0.564113	0.021696		0.566892	0.0162443		0.569121	0.017791		0.56931	0.0156722		0.568114	0.0156828		0.575235	0.0145378		0.57269	0.0157564		0.570581	0.0158276		0.572486	0.0155381		0.571185	0.0391968		0.567081	0.017596
0.574662	0.0138431		0.582297	0.0136352		0.574003	0.0144024		0.57597	0.0149431		0.571589	0.0150606		0.571926	0.0189761		0.572519	0.0157902		0.577243	0.0164634		0.574624	0.0141264		0.575301	0.0158718		0.582109	0.0133721		0.579877	0.0148172		0.578394	0.0144196		0.580298	0.0141894		0.578063	0.0383892		0.574893	0.0161841
0.579662	0.0120241		0.589797	0.0129722		0.577753	0.0136735		0.58347	0.0142985		0.578778	0.0143804		0.577865	0.0160658		0.580019	0.0153481		0.583495	0.0149321		0.578997	0.0127482		0.583426	0.0137831		0.590234	0.0111597		0.58363	0.0137412		0.583395	0.0136996		0.585929	0.0126439		0.58306	0.0359017		0.580211	0.0144196
0.584037	0.0114153		0.594485	0.0122072		0.584316	0.0122852		0.59097	0.0128536		0.585965	0.0129618		0.582237	0.0142254		0.586269	0.0149738		0.587245	0.0133469		0.584935	0.0126254		0.588118	0.0111821		0.595235	0.0105749		0.588002	0.0124782		0.58777	0.0122054		0.590301	0.0111171		0.587748	0.0350555		0.584583	0.0131688
0.591224	0.0108468		0.59886	0.0115848		0.592129	0.0110352		0.595345	0.011908		0.590966	0.0114071		0.587864	0.0147074		0.590642	0.0135936		0.592559	0.0131903		0.59306	0.0129056		0.591864	0.0103327		0.598985	0.00995646		0.595189	0.011389		0.594644	0.0105856		0.596236	0.0103909		0.594622	0.0348404		0.590831	0.011516
0.599037	0.00919586		0.60636	0.0101696		0.597441	0.0104022		0.599408	0.0109817		0.595339	0.0109514		0.595676	0.0131533		0.595956	0.0122752		0.600059	0.0118987		0.599624	0.0112013		0.598426	0.00995499		0.605238	0.0100694		0.602376	0.0101912		0.602457	0.0096844		0.604049	0.010404		0.602435	0.032638		0.598957	0.0102281
0.60435	0.00696026		0.614172	0.00925901		0.601816	0.00943267		0.606282	0.010581		0.602215	0.0101842		0.602863	0.0111152		0.603769	0.0113668		0.60662	0.0101452		0.603686	0.00977951		0.605925	0.00952673		0.612737	0.00824961		0.607381	0.00783631		0.608083	0.00956843		0.610618	0.00905167		0.607749	0.0312474		0.605205	0.00900941
0.608413	0.00769581		0.61917	0.00834208		0.608065	0.00933249		0.613782	0.00892026		0.61034	0.00968724		0.607238	0.0106781		0.610956	0.00989771		0.610995	0.0092108		0.608998	0.0084874		0.611243	0.00920419		0.618673	0.0073482		0.611752	0.00754025		0.612146	0.00815264		0.614989	0.00834757		0.611811	0.0298449		0.609272	0.00948109
0.615599	0.00757477		0.623545	0.00706679		0.61619	0.00784703		0.618783	0.00779696		0.615965	0.00825148		0.612239	0.00945124		0.615642	0.00768716		0.616305	0.00954869		0.616811	0.00754703		0.615615	0.00837483		0.622736	0.00776273		0.618626	0.00758029		0.618707	0.00782413		0.620299	0.00723178		0.618373	0.0316562		0.614894	0.00885241
0.623725	0.00582711		0.630732	0.00788917		0.62244	0.00694462		0.623158	0.00666933		0.620028	0.00686353		0.620052	0.00818413		0.62033	0.0066359		0.623809	0.0071859		0.623998	0.00609388		0.621863	0.00671006		0.628675	0.00694784		0.626752	0.0076336		0.626833	0.00763099		0.628112	0.00691614		0.626498	0.0303096		0.622707	0.00731567
0.628725	0.00469104		0.638857	0.0073378		0.626503	0.00666		0.630032	0.00622101		0.626276	0.00582813		0.627239	0.00817241		0.62783	0.00703175		0.630996	0.00599809		0.628373	0.0067897		0.629988	0.00701127		0.636488	0.00672179		0.632062	0.00648027		0.632459	0.00543014		0.635299	0.00529623		0.632437	0.0253584		0.629581	0.00700008
0.632475	0.00468328		0.643546	0.00683936		0.632128	0.00580097		0.637845	0.00607028		0.634402	0.00642629		0.631927	0.00741029		0.63533	0.00573066		0.635993	0.0078709		0.633372	0.00572995		0.636244	0.00629796		0.643362	0.00574096		0.636128	0.00524274		0.635896	0.00433467		0.639678	0.00415338		0.6365	0.0235096		0.633647	0.00664265
0.638724	0.00475518		0.646983	0.00691125		0.640253	0.00531176		0.64378	0.00420428		0.640652	0.0058273		0.636612	0.00635234		0.640018	0.00606764		0.640369	0.0069664		0.641185	0.00421145		0.640303	0.00608473		0.647424	0.00502181		0.64269	0.0060149		0.641832	0.00419218		0.644363	0.00546194		0.642749	0.022837		0.638958	0.00630173
0.646537	0.00425137		0.653548	0.00660278		0.646816	0.00445408		0.647843	0.00553714		0.644715	0.00569255		0.644424	0.00634217		0.644393	0.00663294		0.647555	0.00626837		0.648373	0.00371062		0.645926	0.00567622		0.652734	0.00432219		0.650815	0.0048737		0.649644	0.00454548		0.652175	0.00439214		0.651187	0.0197529		0.647083	0.005633
0.652162	0.00402894		0.661047	0.00522619		0.650879	0.00381421		0.654095	0.00484346		0.650652	0.0049996		0.651928	0.00466537		0.651893	0.00581042		0.655368	0.00534814		0.652123	0.00403397		0.654051	0.00478401		0.660547	0.00505723		0.656751	0.00518028		0.655584	0.00407125		0.659675	0.00321683		0.657122	0.0175576		0.653957	0.0037628
0.656537	0.00444155		0.66667	0.00544382		0.656504	0.00427098		0.662221	0.0042004		0.658778	0.00453145		0.656299	0.00546463		0.659706	0.00417803		0.660369	0.00579275		0.656499	0.00473919		0.660926	0.00378677		0.667738	0.00503598		0.660817	0.00472109		0.659956	0.00376861		0.663741	0.0034371		0.66025	0.0156837		0.658023	0.00411549
0.662787	0.0038629		0.671046	0.00497675		0.664627	0.00401381		0.668469	0.00367045		0.665028	0.00403755		0.660362	0.00515554		0.664394	0.00423522		0.664744	0.00448475		0.663998	0.00410103		0.664992	0.00399214		0.672109	0.00383467		0.667066	0.00369314		0.665582	0.00332801		0.6678	0.00320263		0.666186	0.0142696		0.662395	0.00350536
0.670913	0.00370807		0.676985	0.00537215		0.671503	0.00268726		0.672532	0.00274964		0.668465	0.00314741		0.66724	0.00435274		0.668144	0.00389802		0.671931	0.00459394		0.671185	0.00293941		0.670302	0.00408035		0.676797	0.00326902		0.675504	0.00352978		0.673082	0.0031187		0.674987	0.00290006		0.673686	0.0149487		0.669895	0.00374244
0.677162	0.00340185		0.685111	0.00488177		0.675253	0.0021733		0.678471	0.0036611		0.673777	0.00279795		0.674739	0.00413341		0.675018	0.00393305		0.679744	0.00362496		0.675874	0.00266496		0.678427	0.00327523		0.684923	0.00335918		0.681126	0.00267982		0.680269	0.00304994		0.682174	0.00283896		0.679938	0.0118603		0.676769	0.00388564
0.681537	0.00248164		0.691672	0.00451361		0.679941	0.00234161		0.686593	0.00335257		0.681589	0.00254843		0.68005	0.00409914		0.682518	0.00453886		0.684745	0.00245626		0.68056	0.002933		0.685614	0.00351495		0.69211	0.00354358		0.684567	0.00192619		0.684644	0.00345001		0.687179	0.00264529		0.68431	0.00909036		0.681461	0.00342211
0.686849	0.00252165		0.695735	0.00412017		0.687441	0.00251799		0.692845	0.00385128		0.688153	0.00222967		0.684425	0.00423423		0.687831	0.00410819		0.688495	0.00273282		0.687436	0.00308998		0.689055	0.00249817		0.696172	0.00358587		0.69019	0.0025167		0.689645	0.00260804		0.69155	0.00247395		0.689624	0.00962845		0.686145	0.00176116
0.694975	0.00208663		0.701357	0.0033516		0.694315	0.00275328		0.696595	0.00375459		0.692528	0.00305799		0.691299	0.00350085		0.691892	0.0037444		0.695056	0.00266003		0.695248	0.00212804		0.69374	0.00243488		0.700235	0.00296268		0.69769	0.00165393		0.697145	0.00251643		0.698424	0.00205279		0.697436	0.00962392		0.693332	0.00221293
0.70185	0.00177472		0.709483	0.00418749		0.699003	0.00299126		0.701596	0.004298		0.697527	0.00354653		0.699112	0.00282805		0.698455	0.00337555		0.702869	0.00358183		0.700873	0.00118106		0.701239	0.0025195		0.707422	0.0031239		0.704251	0.00233115		0.704645	0.00281713		0.706237	0.00202596		0.704623	0.00726858		0.701145	0.00316602
0.706224	0.00211508		0.716361	0.00362936		0.70369	0.00259514		0.709408	0.00269309		0.705027	0.00250186		0.705051	0.00371332		0.706268	0.00331795		0.708182	0.00287795		0.704936	0.0012793		0.708113	0.00148229		0.714922	0.00289034		0.70863	0.00251532		0.709333	0.00247935		0.711867	0.00205076		0.708998	0.00474178		0.706455	0.00279682
0.711224	0.0017073		0.720423	0.00473037		0.710878	0.00261625		0.71597	0.00184662		0.712527	0.00255688		0.709114	0.00321055		0.712518	0.00332681		0.712558	0.00206714		0.711497	0.00242833		0.712805	0.0021267		0.719923	0.00242407		0.713941	0.00206712		0.714021	0.0022306		0.716239	0.00181899		0.714	0.00460035		0.710521	0.00262037
0.719037	0.00139316		0.72542	0.00528327		0.718691	0.0021282		0.720658	0.00226233		0.717528	0.00182705		0.715362	0.00256804		0.716581	0.00288158		0.718494	0.00250613		0.71931	0.00170175		0.71749	0.00238258		0.724298	0.00143272		0.72144	0.00277592		0.721521	0.00159319		0.722488	0.00198245		0.721499	0.00495836		0.717083	0.00268597
0.726225	0.00190386		0.733546	0.00438726		0.724003	0.00151425		0.725655	0.00254623		0.721903	0.00115244		0.723487	0.00267925		0.722518	0.00241819		0.726619	0.00251782		0.725247	0.00105655		0.724677	0.00241737		0.731172	0.00215702		0.72894	0.00161297		0.729333	0.00172749		0.7303	0.00221309		0.728999	0.00391823		0.725208	0.00265339
0.730287	0.00178714		0.740733	0.00367663		0.728065	0.00176854		0.732846	0.00221718		0.72909	0.00213324		0.72974	0.00278538		0.730331	0.00229728		0.733184	0.00240189		0.72931	0.00145913		0.732489	0.0024351		0.738985	0.00215509		0.733624	0.00162213		0.733709	0.00182082		0.736548	0.00155814		0.734	0.00322424		0.730831	0.00314815
0.734662	0.00170213		0.744795	0.00340389		0.73494	0.00262527		0.740346	0.00242013		0.736903	0.00176214		0.733802	0.00275443		0.737205	0.00259565		0.737243	0.00227293		0.73556	0.00142261		0.737807	0.00258122		0.744611	0.00222464		0.738316	0.00128283		0.737772	0.00156107		0.740615	0.00229381		0.738375	0.00262266		0.734897	0.00247739
0.742163	0.00214094		0.749171	0.00517412		0.743065	0.00165147		0.745343	0.0020229		0.742215	0.0017811		0.739738	0.00199275		0.741268	0.00241165		0.742557	0.0017571		0.743998	0.00178035		0.742179	0.00231726		0.748674	0.00180496		0.745503	0.00135215		0.744646	0.00197646		0.746551	0.0017615		0.745875	0.00272048		0.741458	0.00192925
0.749038	0.00214611		0.756358	0.00477372		0.74869	0.000676709		0.750031	0.00131713		0.746277	0.0023671		0.747863	0.0021159		0.746892	0.00317467		0.750682	0.000337896		0.749936	0.0010952		0.74874	0.00191392		0.754922	0.00141984		0.753316	0.00195936		0.751833	0.0021032		0.754676	0.00150741		0.753688	0.00265894		0.749897	0.00203942
0.754037	0.00204266		0.763545	0.00369667		0.752752	0.00143402		0.756905	0.00182907		0.753464	0.00170754		0.754112	0.00179067		0.755018	0.00327047		0.757556	0.000555371		0.753373	0.000641787		0.756865	0.0019431		0.763048	0.00110105		0.758	0.00155967		0.757146	0.00138195		0.760924	0.00174752		0.758376	0.00230158		0.755519	0.00195639
0.758725	0.00180283		0.768233	0.00270459		0.759315	0.00187985		0.764718	0.00138303		0.761589	0.00110834		0.757862	0.00120144		0.761581	0.00338568		0.761932	0.00137787		0.758998	0.000854719		0.762488	0.00169351		0.768987	0.00164181		0.76238	0.00128352		0.761518	0.00132676		0.764678	0.000766105		0.762126	0.00235578		0.75896	0.00153109
0.7656	0.00175179		0.772921	0.00322852		0.767441	0.00112945		0.770032	0.00114109		0.76659	0.0021015		0.762863	0.00283601		0.765331	0.00286533		0.766933	0.0021925		0.766497	0.00105761		0.766555	0.00143493		0.77305	0.00214843		0.769879	0.00175254		0.768083	0.00118988		0.769675	0.000892812		0.768687	0.00240997		0.764583	0.00210593
0.773413	0.00161109		0.779795	0.0042328		0.773066	0.00139334		0.774407	0.00230657		0.770027	0.00231868		0.770675	0.00208649		0.77033	0.00232218		0.775058	0.00230034		0.773061	0.00121096		0.773116	0.00151103		0.779298	0.00146041		0.778005	0.000672644		0.775896	0.00191545		0.777488	0.00147449		0.776187	0.00168122		0.772396	0.0026914
0.779037	0.00174213		0.78792	0.0034028		0.776815	0.00135361		0.781281	0.00164892		0.776591	0.00171207		0.777237	0.00214906		0.77783	0.00203331		0.782245	0.00176339		0.777436	0.0019794		0.781554	0.0013584		0.787424	0.00108173		0.782376	0.000931178		0.781831	0.00205255		0.784049	0.00139198		0.781501	0.00143009		0.778644	0.00202471
0.7831	0.0019599		0.793234	0.0040302		0.78244	0.00150695		0.789406	0.00206121		0.784403	0.00178584		0.781925	0.00191868		0.784706	0.00269757		0.786307	0.000952128		0.782435	0.00170389		0.787177	0.0019137		0.793672	0.00133976		0.78613	0.00091379		0.785894	0.00146817		0.788741	0.00153965		0.785872	0.00214006		0.783023	0.00189283
0.789662	0.00212991		0.797297	0.00345399		0.790253	0.00147759		0.794407	0.00229243		0.790028	0.00214416		0.786926	0.00172566		0.789081	0.00243655		0.790683	0.00108446		0.790248	0.00209942		0.790618	0.00140261		0.797109	0.00186464		0.792691	0.0018365		0.791833	0.000770837		0.793738	0.00169905		0.792437	0.00195329		0.788333	0.0013949
0.797475	0.00215991		0.803858	0.00233447		0.796503	0.00149045		0.798157	0.00140082		0.794401	0.00223193		0.794113	0.00134427		0.79408	0.00166805		0.79787	0.00132934		0.797435	0.001841		0.796241	0.00100353		0.802423	0.00189555		0.800504	0.00124302		0.799959	0.00158048		0.801238	0.000653376		0.80025	0.00163976		0.796146	0.00196386
0.803412	0.00231543		0.812296	0.0029366		0.800878	0.00105441		0.804406	0.00209564		0.800339	0.00196922		0.801612	0.00118132		0.801267	0.00255831		0.805369	0.00115792		0.802123	0.00144354		0.804053	0.00176421		0.810236	0.00141919		0.805814	0.00112153		0.80652	0.00218512		0.808425	0.000762047		0.806498	0.00181812		0.803333	0.0021229
0.807475	0.00097745		0.818232	0.00351041		0.80619	0.00123443		0.811905	0.00146421		0.808152	0.00183694		0.806614	0.00172787		0.80908	0.00309913		0.810058	0.000714883		0.806811	0.00166139		0.810301	0.00257224		0.816797	0.00228002		0.810193	0.00130822		0.810583	0.00173891		0.81343	0.00135184		0.810561	0.00135063		0.808017	0.00204824
0.813724	0.00132488		0.821986	0.00390777		0.814316	0.00146608		0.817845	0.00114907		0.814715	0.00199766		0.811302	0.0010973		0.814081	0.00196663		0.814746	0.0013554		0.814311	0.00170239		0.814681	0.00231457		0.821485	0.00116116		0.816441	0.000898918		0.816206	0.00212131		0.818114	0.00183455		0.816188	0.000941015		0.812709	0.00211091
0.822162	0.00111297		0.828234	0.0034688		0.821503	0.000917953		0.821908	0.000926961		0.818777	0.00264362		0.818176	0.000687391		0.818456	0.00169801		0.82162	0.00123161		0.822123	0.00114048		0.819991	0.00172785		0.826486	0.00192152		0.824567	0.000917221		0.824644	0.00215106		0.824988	0.00105852		0.824313	0.00198416		0.820209	0.00127274
0.8281	0.00158454		0.836672	0.00365027		0.825878	0.00160023		0.827843	0.0012494		0.824089	0.00232198		0.825988	0.00121493		0.825017	0.00200419		0.829433	0.00184787		0.82681	0.00134743		0.827803	0.0012345		0.833986	0.00209262		0.830815	0.000785896		0.831209	0.00257377		0.833114	0.000480676		0.831187	0.00238039		0.827709	0.00111619
0.831537	0.00123884		0.842295	0.00370125		0.830566	0.001924		0.835969	0.00137026		0.832215	0.0022272		0.831302	0.0024345		0.833143	0.00214346		0.835055	0.000836201		0.831185	0.00159304		0.834677	0.00066214		0.841486	0.00158105		0.834874	0.00130113		0.834646	0.00170593		0.838111	0.00161315		0.83525	0.00226271		0.832393	0.00171479
0.837162	0.00113694		0.845732	0.00322307		0.838379	0.00163266		0.842534	0.0011575		0.839091	0.00172546		0.835365	0.00246368		0.838768	0.00230931		0.839118	0.00079037		0.838374	0.00128827		0.839369	0.00123831		0.846174	0.00195415		0.840505	0.00132584		0.839643	0.00166842		0.842177	0.00169612		0.84056	0.00285932		0.837085	0.00202811
0.844662	0.00135177		0.851359	0.00304073		0.845879	0.00189079		0.846905	0.00170251		0.843464	0.00139063		0.842552	0.00246766		0.84283	0.00221457		0.845683	0.00150593		0.846497	0.000104651		0.844054	0.00133034		0.850862	0.00233455		0.848317	0.00156241		0.847147	0.00195533		0.849364	0.00168439		0.848998	0.00214244		0.844585	0.00130306
0.851225	0.00138402		0.859171	0.00332176		0.850565	0.00199769		0.851906	0.0028778		0.848465	0.00132655		0.850364	0.00188728		0.849393	0.00284064		0.853809	0.00180361		0.851186	0.000503819		0.851554	0.00156557		0.858049	0.00189061		0.855191	0.00206209		0.854021	0.00149813		0.85749	0.00139355		0.855563	0.00182503		0.852397	0.00158131
0.855599	0.0013485		0.86542	0.00375397		0.855253	0.00118914		0.860032	0.00218138		0.856591	0.00214436		0.855674	0.00189834		0.85783	0.00384273		0.859744	0.00117657		0.854935	0.000938654		0.859053	0.000985129		0.865861	0.00192625		0.85925	0.00206987		0.858709	0.00142226		0.862487	0.00106889		0.859313	0.00140958		0.856769	0.00186432
0.860912	0.00278252		0.869795	0.00372783		0.862753	0.000892811		0.867219	0.00190477		0.863777	0.00189463		0.859115	0.00129298		0.863143	0.00298539		0.863807	0.00125161		0.861499	0.000884192		0.864051	0.00105045		0.870863	0.00101819		0.864568	0.00150338		0.863706	0.000910735		0.865928	0.00135748		0.863997	0.00130917		0.860523	0.00157815
0.868725	0.00171748		0.875109	0.00372412		0.870565	0.000665386		0.871594	0.00234534		0.86784	0.00233393		0.865364	0.000731831		0.866893	0.00257329		0.870055	0.00166027		0.868998	0.00179551		0.86843	0.0014291		0.874925	0.00180732		0.872693	0.00124371		0.870893	0.0018773		0.872489	0.00167019		0.871501	0.00243869		0.867397	0.00157521
0.875912	0.00082003		0.882922	0.00332524		0.874941	0.00156146		0.876595	0.00158074		0.872216	0.00238214		0.873176	0.00138495		0.872518	0.00299573		0.878493	0.00112624		0.87431	0.00136879		0.87593	0.00151821		0.882112	0.00201834		0.87988	0.00139402		0.878397	0.00159449		0.879989	0.00216462		0.878688	0.0017257		0.874897	0.00184622
0.8806	0.00135902		0.890109	0.00369101		0.879003	0.00151348		0.884408	0.00136433		0.879402	0.00198838		0.879112	0.0014064		0.880331	0.00272859		0.884433	0.000821374		0.878686	0.000595015		0.883742	0.00194355		0.890237	0.00165555		0.883626	0.000826392		0.883394	0.000913321		0.885924	0.00157956		0.883063	0.00117335		0.880207	0.00137047
0.885287	0.00138833		0.894797	0.00320042		0.885878	0.00113271		0.891594	0.00211639		0.886589	0.00173638		0.883487	0.00139203		0.886268	0.00249859		0.88787	0.000742067		0.884936	0.00107064		0.888426	0.00158218		0.895235	0.00136896		0.888318	0.000595542		0.887769	0.000998467		0.889991	0.00139896		0.88806	0.00154346		0.884586	0.00107728
0.892787	0.00158678		0.899485	0.00313985		0.893377	0.000806447		0.895657	0.000806102		0.89159	0.00142257		0.889427	0.00158372		0.890644	0.00252898		0.893493	0.00147335		0.892749	0.0017261		0.89218	0.0012235		0.898672	0.00156088		0.895818	0.00131097		0.894643	0.000209307		0.895927	0.0017987		0.895247	0.00220808		0.891147	0.00222244
0.900287	0.0017711		0.906985	0.00364025		0.898691	0.00151444		0.900033	0.0016398		0.895964	0.00184374		0.897239	0.00120144		0.896268	0.00272859		0.901305	0.00152031		0.898997	0.00175322		0.899054	0.00107514		0.905237	0.000988991		0.902692	0.00147318		0.902769	0.000415597		0.903739	0.00111421		0.902751	0.00183992		0.89896	0.00218443
0.905288	0.00166282		0.914485	0.00369624		0.902754	0.00160004		0.907219	0.00189976		0.90284	0.00152972		0.903801	0.000590992		0.904081	0.00227576		0.907558	0.0013718		0.903373	0.00104181		0.906554	0.00131799		0.913049	0.00127708		0.907063	0.000896401		0.908083	0.00135845		0.910613	0.000894165		0.908061	0.00173628		0.905208	0.00156797
0.909975	0.00194387		0.919486	0.00387422		0.909315	0.00109912		0.914719	0.00189451		0.910652	0.00156639		0.908176	0.0013708		0.910955	0.00237198		0.911933	0.00149559		0.908997	0.000495276		0.911864	0.00159205		0.918359	0.000951853		0.911755	0.00091562		0.912145	0.00201224		0.91468	0.00107002		0.912436	0.00171792		0.909267	0.00183288
0.917162	0.00184817		0.923857	0.00390036		0.91744	0.000895306		0.919407	0.00241831		0.916277	0.00158329		0.91349	0.00156227		0.91533	0.00234181		0.917556	0.00183281		0.91681	0.00107684		0.916243	0.00124437		0.922735	0.000759507		0.918942	0.00118148		0.919019	0.00146882		0.91999	0.000735668		0.918998	0.00165487		0.914897	0.00221045
0.925287	0.000918827		0.931361	0.00430077		0.923378	0.00124076		0.923783	0.00229403		0.92034	0.00176214		0.921302	0.00114152		0.920642	0.00304616		0.925056	0.00137899		0.923686	0.00103476		0.922805	0.00205869		0.928987	0.00116974		0.926755	0.00127825		0.927145	0.00152572		0.928115	0.00149929		0.927123	0.00174448		0.923023	0.00191522
0.929974	0.000902447		0.939173	0.00419729		0.927441	0.00135707		0.930657	0.00190135		0.926903	0.00235598		0.928489	0.000540582		0.928142	0.00299172		0.932246	0.00165106		0.928061	0.000891454		0.930617	0.00254037		0.9368	0.00101625		0.932065	0.00106891		0.932458	0.00102541		0.934989	0.000946471		0.93275	0.00236485		0.929584	0.0010662
0.933412	0.00066899		0.943545	0.00404044		0.933378	0.000851356		0.938782	0.00133788		0.935026	0.00173412		0.932865	0.000766101		0.935644	0.00253974		0.936931	0.000788123		0.933373	0.000857496		0.936866	0.00200662		0.943361	0.000894321		0.936437	0.000980139		0.935896	0.00107046		0.939361	0.000319023		0.936812	0.00206514		0.933643	0.00109063
0.939975	0.000654334		0.947608	0.00348427		0.941503	0.000753861		0.944405	0.00206919		0.940964	0.00157319		0.937862	0.000758584		0.94033	0.00245533		0.941619	0.000893491		0.941499	0.00054034		0.940932	0.00131912		0.947736	0.00105575		0.943005	0.00086254		0.942144	0.00106184		0.944366	0.00149704		0.943373	0.00103019		0.939273	0.00104742
0.947787	0.000652955		0.954173	0.0047247		0.948065	0.00087573		0.948468	0.00235012		0.945027	0.00186166		0.945675	0.00146322		0.945018	0.00230868		0.949119	0.00183102		0.948373	0.000817772		0.946555	0.00168206		0.95305	0.0011983		0.951131	0.00145854		0.949644	0.000716086		0.952178	0.00186363		0.951812	0.000901284		0.947399	0.000904448
0.9531	0.00107659		0.961672	0.0048931		0.952127	0.000477304		0.95472	0.0020986		0.951277	0.00175431		0.953174	0.00204625		0.952518	0.00280097		0.956618	0.00147313		0.952123	0.000575153		0.95468	0.00122215		0.960863	0.000987488		0.956754	0.00196165		0.955583	0.000866114		0.959678	0.00244486		0.957438	0.000955698		0.95396	0.00177157
0.957475	0.000994692		0.966982	0.00392934		0.957752	0.000902407		0.962845	0.00188539		0.959402	0.00199869		0.957237	0.0015552		0.96033	0.00214198		0.961619	0.000692416		0.956498	0.00120818		0.961241	0.00165984		0.967737	0.00119314		0.960812	0.000916078		0.959646	0.00092841		0.963424	0.00170762		0.960562	0.000811674		0.957706	0.00151186
0.963725	0.000928655		0.971358	0.00411255		0.965877	0.00147126		0.969094	0.00216017		0.965653	0.00151179		0.961612	0.00162374		0.964393	0.00193878		0.965995	0.0012361		0.963998	0.000870738		0.9653	0.00153235		0.972112	0.0008589		0.967374	0.000371327		0.965581	0.000860941		0.967803	0.00123122		0.966498	0.00172095		0.962711	0.000959873
0.971849	0.00160247		0.977923	0.00351041		0.972441	0.00115133		0.973157	0.00100997		0.96909	0.0021355		0.968799	0.00184417		0.968456	0.00212299		0.973495	0.0011195		0.971186	0.00193519		0.970931	0.00138241		0.977109	0.00104094		0.975812	0.00118056		0.973707	0.00102153		0.97499	0.00167695		0.974311	0.00167992		0.970211	0.000829341
0.9781	0.00134988		0.985735	0.00362217		0.976191	0.0016484		0.979096	0.001443		0.974402	0.0016995		0.97599	0.00143536		0.97533	0.00248213		0.981307	0.00118129		0.975873	0.00232026		0.979056	0.00141743		0.985235	0.000686734		0.981442	0.00114716		0.980268	0.00108232		0.982177	0.000784592		0.98025	0.00147717		0.977085	0.00141006
0.982474	0.00138609		0.991984	0.00419773		0.98119	0.00110488		0.98753	0.00170479		0.982214	0.000910535		0.980987	0.000346238		0.98283	0.00197127		0.985995	0.00196312		0.980561	0.00140168		0.98593	0.0017595		0.992113	0.00180281		0.984876	0.00109819		0.984644	0.000981653		0.987174	0.000682911		0.984626	0.00230892		0.981456	0.00173175
0.9881	0.00127263		0.996359	0.00440163		0.988691	0.00100777		0.993783	0.00170616		0.988777	0.000761973		0.985363	0.00124168		0.987831	0.00227808		0.989745	0.00168858		0.987435	0.00137861		0.989676	0.00143022		0.996172	0.00231223		0.990498	0.000818155		0.989957	0.0015572		0.991553	0.0015038		0.990248	0.00202562		0.986461	0.00181161
0.995912	0.00131677		1.00198	0.00429206		0.995565	0.00183936		0.99722	0.00116663		0.993153	0.000937322		0.992237	0.00207632		0.992519	0.00261085		0.996307	0.000880236		0.995248	0.000887824		0.994368	0.00122978		1.00055	0.00204281		0.998311	0.000591653		0.99777	0.00250565		0.998427	0.0015401		0.998061	0.00185785		0.993648	0.00211407
1.00279	0.00134539		1.00979	0.00382847		0.999941	0.00107091		1.00253	0.00199462		0.998465	0.00169126		1.00036	0.00185014		0.99908	0.00232556		1.00381	0.000608167		1.00087	0.000952322		1.00187	0.00148723		1.00805	0.00169633		1.00457	0.00159902		1.00496	0.00245607		1.00655	0.00112458		1.00494	0.00180063		1.00146	0.00206679
1.00685	0.0012378		1.01667	0.003686		1.00494	0.000580365		1.01003	0.00239915		1.00596	0.00228757		1.00599	0		1.00689	0.00299637		1.00912	0.000432704		1.00494	0.0013925		1.00874	0.00139049		1.01524	0.000831637		1.00894	0.00187654		1.00933	0.0018454		1.01218	0.000441671		1.00931	0.00175938		1.00677	0.00179261
1.01216	0.00129057		1.02074	0.00326817		1.01244	0.000517416		1.01659	0.00105489		1.01315	0.00179676		1.01005	0.000961772		1.01283	0.00336332		1.0135	0.00115747		1.0115	0.000251589		1.01343	0.00167353		1.01992	0.000710777		1.01425	0.000987689		1.01402	0.00161777		1.01624	0.00021441		1.01431	0.00125519		1.01083	0.0015967
1.02029	0.0012666		1.02605	0.00370386		1.01994	0.00091373		1.02097	0.000452877		1.01784	0.00150684		1.01661	0.00175617		1.01689	0.00331288		1.02006	0.00144841		1.01962	0.00035923		1.01812	0.00127041		1.02461	0.000601938		1.02206	0.00155989		1.02183	0.00150891		1.0228	0.000676824		1.02212	0.00230525		1.01771	0.00140124
1.02716	0.00110142		1.03448	0.00386485		1.02494	0.00144535		1.02597	0.00194012		1.02253	0.00190782		1.02443	0.00110725		1.02283	0.00273155		1.02787	0.000836426		1.02556	0.000819053		1.02562	0.00170181		1.03148	0.00112209		1.02926	0.00124805		1.02933	0.000962253		1.03062	0.00190534		1.02931	0.00271508		1.02583	0.00251517
1.03091	0.000589849		1.04104	0.00397661		1.02932	0.00175434		1.03378	0.0021661		1.03003	0.00143205		1.03068	0.000977249		1.03096	0.002449		1.03412	0.00052886		1.02962	0.000648835		1.03343	0.00198934		1.03961	0.00108066		1.03363	0.00151803		1.03371	0.00237589		1.03655	0.00191932		1.034	0.00231238		1.03115	0.00176297
1.0356	0.00033984		1.04479	0.00529895		1.03619	0.00180788		1.04128	0.00227123		1.03753	0.00179119		1.03474	0.00173583		1.03721	0.00255008		1.03818	0.00108401		1.03587	0.00176988		1.03843	0.00179765		1.04492	0.00180989		1.03831	0.000921111		1.03777	0.00204328		1.04061	0.000725974		1.03869	0.002009		1.03521	0.00194463
1.0431	0.00106245		1.04948	0.00576842		1.04432	0.00139199		1.04597	0.0023898		1.04253	0.00272584		1.04068	0.00148201		1.04158	0.00149143		1.04412	0.000627039		1.044	0.000704364		1.04249	0.00233073		1.04899	0.00170535		1.04612	0.00141415		1.04496	0.000909441		1.04687	0.00153514		1.04619	0.00195998		1.04208	0.00211136
1.05029	0.00186455		1.05698	0.00516781		1.04963	0.00129047		1.05066	0.00125305		1.0469	0.00200631		1.04911	0.000728073		1.04721	0.00286258		1.05193	0.00162163		1.04962	0.000204176		1.04937	0.00199203		1.05555	0.00124531		1.05362	0.00104306		1.05214	0.00105775		1.0553	0.00161834		1.054	0.00177428		1.0502	0.00160213
1.05497	0.00196128		1.06386	0.00358688		1.05369	0.000931962		1.05784	0.00181219		1.05409	0.00145657		1.05505	0.00167835		1.05564	0.00205525		1.05881	0.000982907		1.05337	0.000928189		1.05749	0.00202884		1.06336	0.00113626		1.05832	0.000613388		1.05715	0.00123321		1.06124	0.001479		1.05838	0.00211912		1.05584	0.00154738
1.05966	0.00138453		1.06854	0.00277757		1.06057	0.00138125		1.06566	0.00166534		1.06221	0.00181036		1.05849	0.00115081		1.06221	0.00121923		1.06287	0.00122757		1.059	0.00188329		1.0628	0.00184299		1.0693	0.00178349		1.063	0.00152123		1.06152	0.0014242		1.06467	0.000950304		1.06244	0.00107252		1.05927	0.00171026
1.06654	0.00147109		1.07323	0.00386464		1.06869	0.00156837		1.07097	0.00106629		1.0669	0.00142772		1.0638	0.00131708		1.06564	0.00233569		1.06818	0.00120128		1.06681	0.000317583		1.06686	0.00150878		1.07336	0.00105404		1.0705	0.00115997		1.0684	0.00192214		1.06999	0.00129075		1.06931	0.000949868		1.0652	0.00161864
1.07435	0.000752269		1.08042	0.00448856		1.074	0.00169964		1.07503	0.00120585		1.07065	0.00163645		1.07161	0.00126025		1.07064	0.00274231		1.07631	0.00158164		1.07275	0.00130237		1.07374	0.00147399		1.07961	0.0011794		1.078	0.000959776		1.07621	0.00107305		1.07749	0.00119042		1.0765	0.000515421		1.0727	0.00126596
1.07966	0.000662439		1.08823	0.00444956		1.07744	0.00181057		1.08222	0.00166306		1.07722	0.0015973		1.07817	0.00112538		1.07814	0.00287968		1.08318	0.00125722		1.07712	0.00222693		1.08217	0.00116379		1.08805	0.000750062		1.08269	0.000707878		1.08214	0.000758551		1.08405	0.00193172		1.08181	0.00109281		1.07865	0.00161366
1.08404	0.00041674		1.09355	0.00492425		1.08369	0.00142481		1.09034	0.00195266		1.08503	0.00207987		1.08255	0.00146234		1.0847	0.00324684		1.08693	0.0017598		1.08275	0.00175258		1.08749	0.00134605		1.09398	0.00112874		1.08644	0.00123524		1.08621	0.00115173		1.08842	0.00175519		1.08619	0.00134739		1.08302	0.00168606
1.0906	0.000617782		1.09792	0.0039753		1.09119	0.00122387		1.09503	0.00153673		1.09034	0.00186207		1.08755	0.00229233		1.08908	0.0021979		1.09162	0.00156546		1.09025	0.00102045		1.09093	0.00102127		1.09742	0.00146749		1.09331	0.00182209		1.09246	0.000620162		1.09374	0.00113022		1.09275	0.00101853		1.08864	0.00182292
1.09872	0.00106849		1.10448	0.00347795		1.09713	0.00100009		1.09878	0.0019497		1.09472	0.00165602		1.09536	0.00213911		1.09408	0.00150135		1.09912	0.000958644		1.09744	0.00106637		1.09687	0.00184097		1.10305	0.00221541		1.10081	0.000765533		1.10027	0.00060033		1.10124	0.00180163		1.10056	0.00169266		1.09645	0.00207064
1.10466	0.00131884		1.1123	0.00381998		1.1015	0.000683234		1.10534	0.00186487		1.10096	0.0010389		1.10286	0.00202812		1.10158	0.0017936		1.10599	0.00094786		1.10212	0.00057323		1.10468	0.00187464		1.11055	0.00206385		1.10582	0.00145648		1.10652	0.00104352		1.10874	0.00154236		1.10681	0.00158103		1.10334	0.00244776
1.10872	0.000668473		1.11824	0.0050225		1.10713	0.000176374		1.11284	0.00199188		1.10878	0.0015872		1.10755	0.00166398		1.10939	0.00139415		1.11068	0.00157445		1.10681	0.000876718		1.11093	0.0012125		1.11711	0.00124016		1.11019	0.0015075		1.11058	0.00119937		1.11343	0.00165734		1.11087	0.00148645		1.10771	0.00187337
1.11497	0.000537089		1.1223	0.0051543		1.11494	0		1.11816	0.000943379		1.11503	0.00126659		1.11193	0.00134383		1.11439	0.00183475		1.11537	0.00218599		1.11431	0.00125111		1.11499	0.00113551		1.12148	0.00154435		1.11675	0.00149377		1.11652	0.00158112		1.1178	0.00163073		1.1165	0.000842984		1.1127	0.00137907
1.12341	0.00084279		1.12886	0.0037104		1.12213	0.000271183		1.12253	0.00027957		1.1194	0.00170115		1.11943	0.00131906		1.11846	0.00202677		1.12256	0.00226484		1.12181	0.00159795		1.12062	0.00145154		1.1268	0.0012818		1.12456	0.00137778		1.12465	0.00156431		1.1253	0.00128601		1.12462	0.00116321		1.12052	0.000761021
1.12904	0.00144264		1.13698	0.00424347		1.1265	0.000498032		1.12878	0.0011461		1.12471	0.00169311		1.12724	0.00173097		1.12564	0.00296915		1.13037	0.00187977		1.1265	0.00127546		1.12843	0.00163133		1.1343	0.000654104		1.13082	0.00137091		1.1309	0.00151775		1.13312	0.00160548		1.13119	0.00139554		1.1277	0.00155552
1.13247	0.00167575		1.14261	0.00478004		1.1315	0.00152423		1.13691	0.00141404		1.13284	0.000654209		1.13224	0.00216343		1.13345	0.0022842		1.13568	0.00173441		1.13119	0.00232432		1.13531	0.00114225		1.14148	0.00154177		1.13488	0.000722063		1.13464	0.00167295		1.1378	0.00102155		1.13525	0.00158405		1.1324	0.0020444
1.13841	0.00180455		1.14605	0.00441361		1.13931	0.0016127		1.14316	0.00170365		1.13972	0.00138486		1.13661	0.00117646		1.13877	0.00174232		1.14006	0.00163556		1.13869	0.00154093		1.13968	0.00144302		1.14617	0.00173734		1.14081	0.00140111		1.13965	0.00112823		1.14217	0.000916936		1.14088	0.00194983		1.13708	0.00167655
1.14591	0.00130574		1.15198	0.00487284		1.1465	0.0015985		1.14753	0.0014202		1.14378	0.00188021		1.1438	0.00131022		1.14314	0.00294572		1.14662	0.00098448		1.1465	0.00155439		1.14467	0.00145603		1.15086	0.00114441		1.14863	0.00100714		1.14715	0.00135241		1.14937	0.00102087		1.149	0.00219988		1.14458	0.0010429
1.15216	0.00134764		1.1598	0.00420622		1.15119	0.00174551		1.15316	0.000181059		1.14909	0.00164449		1.15161	0.0016737		1.15002	0.00243149		1.15475	0.0004017		1.15087	0.000901919		1.15249	0.00177117		1.15836	0.00137132		1.1555	0.000844924		1.15371	0.00200405		1.15749	0.000941511		1.15556	0.00242077		1.15239	0.00127252
1.15654	0.00123367		1.16574	0.00314225		1.15588	0.000709144		1.16097	0.000950448		1.15722	0.00136096		1.1563	0.00113445		1.15814	0.00252729		1.16037	0.001472		1.15462	0.000584763		1.15999	0.00191572		1.16586	0.00173841		1.15957	0.00107257		1.1584	0.00186523		1.16218	0.000646612		1.15931	0.00193774		1.15646	0.00108158
1.16185	0.000816754		1.16979	0.00272006		1.16369	0.000858265		1.16784	0.00060794		1.1644	0.00142731		1.16005	0.000628137		1.16314	0.00210695		1.16443	0.00195795		1.1615	0.00119131		1.16437	0.00160462		1.17086	0.00227315		1.16519	0.000978766		1.1634	0.00192839		1.16592	0.000632634		1.16431	0.00123144		1.16052	0.00129265
1.16966	0.000844859		1.17542	0.00363982		1.17119	0.000912003		1.17222	0.00113037		1.16815	0.00177986		1.16661	0.00103053		1.16689	0.00228483		1.17131	0.00166589		1.169	0.00138652		1.16905	0.00168789		1.17524	0.00103343		1.17331	0.00125652		1.1709	0.00169364		1.17249	0.00109009		1.17181	0.00118933		1.16739	0.00189079
1.17685	0.00160213		1.18323	0.00370277		1.17557	0.00128183		1.17722	0.00145555		1.17284	0.00194985		1.17411	0.000984988		1.17314	0.0031274		1.17943	0.00139022		1.17431	0.000770572		1.17686	0.00190674		1.18242	0.000196639		1.17988	0.00201542		1.1784	0.00194046		1.17999	0.00125264		1.17869	0.00149725		1.17458	0.00124152
1.18122	0.00157644		1.19042	0.00347273		1.17963	0.00142289		1.18535	0.00104257		1.18034	0.00102901		1.18005	0.00150722		1.18064	0.00298075		1.18506	0.00199547		1.17868	0.000495917		1.18436	0.00182818		1.19024	0.00113475		1.18363	0.00161572		1.18308	0.00153305		1.18561	0.00226788		1.18306	0.00153849		1.1799	0.00133382
1.18622	0.000982623		1.1948	0.00429489		1.18682	0.00161712		1.19253	0.000963219		1.18721	0.000979768		1.18411	0.00131111		1.18658	0.00251653		1.18881	0.00165578		1.18494	0.000304342		1.18874	0.00161517		1.19492	0.00129018		1.18831	0.00108287		1.18777	0.00171542		1.18999	0.001541		1.18806	0.00218174		1.18427	0.000602211
1.19372	0.000805547		1.1998	0.00481271		1.194	0.00195681		1.19628	0.00157184		1.1919	0.00174669		1.19005	0.00127816		1.19096	0.00275856		1.19443	0.000238144		1.19306	0.000895939		1.1928	0.00157634		1.19867	0.000974393		1.19613	0.000847212		1.19465	0.0011776		1.19593	0.0012319		1.19525	0.00221326		1.19083	0.000886802
1.20122	0.000483638		1.2073	0.00389797		1.19932	0.00205105		1.20097	0.000874513		1.19659	0.00227314		1.19818	0.000990072		1.19658	0.00208712		1.20224	0.000327786		1.19931	0.00149608		1.19968	0.00152202		1.20524	0.000727306		1.20269	0.000687973		1.20246	0.00135026		1.20405	0.00185146		1.20275	0.00138777		1.19896	0.0013302
1.20622	0.000949173		1.2148	0.00408292		1.20369	0.00150811		1.20816	0.00120722		1.20378	0.00160554		1.20474	0.00143558		1.20439	0.00231649		1.2085	0.00106064		1.20337	0.00223867		1.20717	0.00081185		1.21274	0.0015085		1.20738	0.000458497		1.20777	0.00108124		1.2103	0.00125422		1.20775	0.00136186		1.20459	0.00149987
1.2106	0.000779857		1.21948	0.00483101		1.21057	0.00129815		1.21534	0.000662897		1.21159	0.00163583		1.20911	0.00186031		1.21127	0.00271171		1.21287	0.00203883		1.20931	0.00207444		1.21249	0.000896694		1.21805	0.0019505		1.21238	0.000661434		1.21183	0.001646		1.21467	0.00118095		1.21244	0.00168554		1.20896	0.00159036
1.2181	0.00098245		1.22417	0.00414544		1.21838	0.00130045		1.22003	0.000525164		1.21659	0.00236628		1.21443	0.00135621		1.21564	0.00226373		1.21818	0.00196694		1.21712	0.00151509		1.21686	0.000959317		1.22242	0.0017002		1.21956	0.00117987		1.21902	0.00158565		1.21999	0.000617303		1.21931	0.000953971		1.21489	0.00140576
1.22591	0.000458465		1.23199	0.00324725		1.22432	0.00141195		1.22472	0.00235058		1.22096	0.00206998		1.22224	0.00131287		1.22096	0.00260557		1.22631	0.00188381		1.22369	0.00126798		1.22343	0.00173929		1.22867	0.00111092		1.22706	0.00108081		1.22714	0.00138583		1.22811	0.00101163		1.22713	0.00176565		1.22302	0.00105489
1.23029	0.00155299		1.23949	0.00423759		1.22869	0.00145053		1.23159	0.00197478		1.22753	0.00230446		1.22911	0.00151009		1.22877	0.00239815		1.23349	0.0013217		1.22806	0.00120348		1.23124	0.00261511		1.23649	0.00125647		1.23238	0.00179807		1.23214	0.0012483		1.23499	0.00117847		1.23244	0.00204614		1.22927	0.00187088
1.23435	0.00134902		1.24386	0.0037202		1.23463	0.00164686		1.23941	0.00115135		1.23565	0.00164737		1.23349	0.00134515		1.23596	0.00254607		1.23787	0.00120218		1.23337	0.0014587		1.23718	0.00179765		1.24273	0.00129833		1.23675	0.00118994		1.23589	0.00148714		1.23905	0.00217431		1.23681	0.00145989		1.23333	0.00254119
1.24123	0.000721406		1.24792	0.00401147		1.24275	0.00203934		1.24503	0.000728798		1.24128	0.00163439		1.2388	0.0011444		1.24033	0.00215211		1.24287	0.00110782		1.2415	0.00110054		1.24124	0.00230043		1.24711	0.00143272		1.24363	0.00152054		1.24214	0.00184604		1.24436	0.00210871		1.24369	0.0011319		1.23927	0.00213964
1.24841	0.00214008		1.2548	0.00404175		1.249	0.00130486		1.24909	0.000347981		1.24534	0.00150664		1.24661	0.00152137		1.24533	0.00225023		1.25037	0.00106379		1.24837	0.00093545		1.24718	0.0013667		1.25274	0.00126377		1.25175	0.00196234		1.24965	0.00209544		1.25249	0.00110812		1.25181	0.00120186		1.24739	0.00176003
1.25372	0.00130126		1.26198	0.00507152		1.25307	0.00139545		1.25566	0.00072743		1.25221	0.00160616		1.2538	0.00166353		1.25314	0.00172186		1.25787	0.00116354		1.25212	0.00160009		1.2553	0.00152068		1.26086	0.0017953		1.25706	0.00176215		1.25558	0.00183052		1.25967	0.000411686		1.25712	0.00146442		1.25396	0.00139015
1.2581	0.0012835		1.2673	0.00523403		1.259	0.00148335		1.26378	0.00125168		1.26034	0.00121054		1.25786	0.000801256		1.26064	0.00290036		1.26256	0.001339		1.25681	0.00170901		1.26186	0.00101767		1.26774	0.00165769		1.26113	0.00129312		1.25996	0.00160138		1.26343	0.00144563		1.26056	0.00163285		1.2574	0.00103
1.26466	0.00150713		1.27167	0.00348384		1.26713	0.00112139		1.26972	0.0013039		1.26596	0.00181571		1.26224	0.001289		1.26471	0.00270475		1.26725	0.00197615		1.26431	0.00131646		1.26593	0.000856741		1.2718	0.00157032		1.268	0.00124348		1.26589	0.00157185		1.2678	0.00187761		1.26681	0.00235923		1.26239	0.00209598
1.27248	0.00132057		1.27823	0.00384677		1.27338	0.00110891		1.27378	0.0010184		1.26971	0.00207101		1.26942	0.00155321		1.26877	0.00299531		1.27475	0.000901579		1.27119	0.00181751		1.27155	0.000558217		1.27711	0.00154392		1.27644	0.00136931		1.27371	0.00143152		1.2753	0.00168575		1.27431	0.00260841		1.27021	0.00184373
1.27872	0.00246251		1.28605	0.00394459		1.27713	0.000895114		1.28003	0.000401113		1.27534	0.00149819		1.27661	0.00194521		1.27595	0.00238992		1.28256	0.00090405		1.27587	0.00219874		1.27999	0.00154828		1.28523	0.00239831		1.28175	0.0011888		1.28027	0.0014824		1.28218	0.00212065		1.28025	0.00207637		1.27708	0.00261086
1.28279	0.000978485		1.29198	0.00320499		1.28213	0.00159754		1.28816	0.00170684		1.28315	0.000296712		1.28161	0.00213646		1.28314	0.00137791		1.28693	0.000825418		1.28056	0.00180085		1.28655	0.0016237		1.29211	0.00159973		1.28519	0.00133591		1.28465	0.00102821		1.28686	0.000807815		1.28462	0.00212344		1.28146	0.0015053
1.28872	0.000784339		1.29605	0.00343635		1.28994	0.00100873		1.29409	0.00183956		1.2894	0.00125814		1.2863	0.00231842		1.28814	0.000491868		1.29068	0.000429334		1.28775	0.00150185		1.28999	0.00140396		1.29586	0.00169848		1.29113	0.00170449		1.28996	0.00085469		1.29155	0.000653151		1.29025	0.00178702		1.28646	0.000803325
1.29685	0.000244836		1.3023	0.00381649		1.2965	0.00118453		1.29753	0.0012681		1.29378	0.00121631		1.29317	0.00108227		1.29283	0.00153891		1.29756	0.000788348		1.29556	0.00176048		1.29499	0.00148454		1.30055	0.00142413		1.29894	0.00112039		1.29777	0.00153715		1.29874	0.00110294		1.29806	0.00215561		1.29364	0.00164805
1.30341	0.0015992		1.31042	0.00420622		1.30119	0.00159274		1.30316	0.000768021		1.29909	0.0018835		1.30099	0.000931482		1.29939	0.00227428		1.30474	0.0022435		1.30056	0.00208405		1.3028	0.0013061		1.30805	0.00145247		1.30488	0.00181042		1.30464	0.00119549		1.30655	0.0012301		1.30494	0.00268571		1.30146	0.00180754
1.30747	0.00146195		1.31667	0.00415568		1.30619	0.000887437		1.31097	0.000635076		1.3069	0.00245282		1.30661	0.00167857		1.30752	0.00223841		1.31006	0.00150795		1.30494	0.00116547		1.30968	0.00166747		1.31492	0.00214414		1.30925	0.00170655		1.30902	0.00176499		1.31187	0.0015286		1.30931	0.00194227		1.30646	0.00134762
1.3131	0.000560193		1.32073	0.00481751		1.31338	0.000767295		1.31722	0.000384694		1.31409	0.00219423		1.31068	0.00105905		1.31314	0.00278135		1.31475	0.00183933		1.31181	0.00013989		1.31406	0.00167824		1.31961	0.00122749		1.31456	0.0012492		1.31433	0.00212261		1.31624	0.00215267		1.31462	0.00148451		1.31052	0.00164036
1.32123	0.00106504		1.32667	0.00451383		1.32088	0.000732174		1.32159	0.000794929		1.31846	0.000898997		1.31724	0.000633001		1.3172	0.00166383		1.32131	0.00173261		1.31994	0.000658232		1.31905	0.00132899		1.3243	0.00124123		1.32238	0.002357		1.32214	0.00220107		1.3228	0.00198696		1.32212	0.00123662		1.31771	0.00174193
1.32779	0.000570194		1.3348	0.00365136		1.32588	0.00128605		1.32691	0.00141701		1.32347	0.000882513		1.32536	0.00111455		1.32346	0.00141272		1.32912	0.00145021		1.32525	0.000693472		1.32655	0.0018109		1.33149	0.00155336		1.32956	0.00103711		1.32933	0.000866545		1.33061	0.00147089		1.32931	0.00191939		1.32583	0.00212697
1.33154	0.000386049		1.34136	0.00351804		1.33057	0.000981094		1.33441	0.000935626		1.33097	0.0015019		1.3313	0.00149042		1.33158	0.00234307		1.33506	0.00127362		1.32931	0.00146084		1.33405	0.00158779		1.33899	0.00128953		1.33394	0.00104329		1.33339	0.00122092		1.33655	0.00116562		1.334	0.00194076		1.33114	0.00177361
1.33654	0.00049088		1.34511	0.00336772		1.33744	0.00111256		1.34191	0.000873601		1.33846	0.0012192		1.33505	0.00136815		1.33783	0.00183622		1.33912	0.00189729		1.33619	0.000829091		1.33906	0.00142618		1.34461	0.00102527		1.33894	0.000928661		1.33777	0.00150805		1.34061	0.000895518		1.33869	0.00169482		1.33521	0.00145463
1.34404	0.000891585		1.35011	0.00338079		1.34525	0.00169216		1.34659	0.0016081		1.34346	0.00190679		1.3413	0.00129784		1.34189	0.002334		1.34506	0.00131653		1.34431	0.00132971		1.34343	0.00179137		1.34899	0.0013784		1.34675	0.00110231		1.34496	0.00141191		1.34717	0.00155318		1.3465	0.00129039		1.34208	0.000777988
1.35091	0.000766925		1.35761	0.00300196		1.35056	0.000917761		1.35128	0.000782387		1.34784	0.00250145		1.34974	0.00132128		1.34783	0.00207277		1.35318	0.00145875		1.34994	0.00133697		1.35062	0.00151866		1.35555	0.00225598		1.35394	0.00124393		1.35214	0.00117393		1.3553	0.00237091		1.354	0.000819015		1.35021	0.00113678
1.3556	8.17271e-05		1.36417	0.00288366		1.35463	0.00115037		1.35878	0.00154151		1.35534	0.00172917		1.35567	0.0020352		1.35595	0.00170877		1.35974	0.00166791		1.35337	0.00108346		1.35843	0.00171707		1.36367	0.00252518		1.35862	0.00151116		1.35714	0.00169149		1.36092	0.00186927		1.35837	0.00132364		1.35521	0.00162882
1.36029	0.000952622		1.36886	0.00406789		1.36182	0.00140946		1.36628	0.00085627		1.36315	0.00198323		1.35912	0.00223794		1.36221	0.00119306		1.36381	0.0012916		1.35931	0.000705646		1.36374	0.00202615		1.3693	0.00250049		1.36332	0.001583		1.36152	0.00132504		1.36468	0.000989759		1.36244	0.00128736		1.35865	0.00226836
1.36747	0.00101349		1.37386	0.00338145		1.36994	0.0010855		1.37128	0.00081682		1.36784	0.00141639		1.36474	0.0018539		1.36595	0.0013528		1.36943	0.00171262		1.36712	0.000857923		1.36812	0.00208136		1.37336	0.00203809		1.37082	0.00125263		1.36839	0.00104912		1.3703	0.00213576		1.36931	0.00174772		1.36489	0.00156322
1.37529	0.000556228		1.38104	0.00252596		1.37494	0.00108089		1.37566	0.000796525		1.37159	0.00185466		1.37224	0.00157731		1.37127	0.00174042		1.37756	0.00125183		1.37306	0.000711198		1.37499	0.00154514		1.37992	0.00111178		1.37863	0.00112107		1.37652	0.00207928		1.3778	0.00192451		1.37681	0.000775182		1.37271	0.00142431
1.3806	0.000884171		1.38854	0.00244187		1.37838	0.000622972		1.38284	0.00104235		1.37846	0.00171166		1.3788	0.0018696		1.37877	0.00118525		1.38412	0.00152165		1.37712	0.000491645		1.38312	0.00151641		1.38805	0.000433207		1.38269	0.00137206		1.38215	0.00198141		1.38406	0.000841182		1.38181	0.00141951		1.37864	0.00112954
1.38497	0.000490018		1.39355	0.00330564		1.38463	0.00089473		1.39066	0.00153832		1.38597	0.001233		1.38317	0.00114661		1.38533	0.00177503		1.38787	0.00135405		1.38275	0.000600568		1.38843	0.00128657		1.39336	0.00145504		1.38675	0.00123936		1.38621	0.00175378		1.38843	0.000437388		1.38619	0.00132494		1.38271	0.00127749
1.39154	0.000194835		1.39823	0.0025595		1.39244	0.00120353		1.39534	0.000767564		1.39128	0.0022		1.38849	0.00211877		1.38971	0.00119327		1.39287	0.000563459		1.39056	0.00135384		1.39187	0.00126009		1.39711	0.00189855		1.39363	0.00167726		1.39246	0.00159276		1.39405	0.00172024		1.39306	0.00100255		1.38864	0.00219551
1.39966	0.000819513		1.40511	0.0026974		1.39838	0.0011686		1.39941	0.000932662		1.39565	0.00228159		1.39599	0.00196931		1.39502	0.00176195		1.40037	0.00147874		1.39775	0.000862408		1.39812	0.00220391		1.40273	0.00148681		1.40113	0.00153152		1.40058	0.00101873		1.40155	0.0023522		1.40087	0.00186605		1.39646	0.00144015
1.40529	0.000587953		1.41323	0.00258826		1.40275	0.00140716		1.40597	0.000894124		1.40221	0.00155897		1.40317	0.00244666		1.40252	0.00219874		1.40724	0.00163399		1.40212	0.000788512		1.40593	0.00205533		1.41055	0.00150699		1.40644	0.00129267		1.40652	0.000851672		1.40874	0.00183928		1.40681	0.0015387		1.40333	0.000732743
1.40935	0.000792443		1.41855	0.00233338		1.40869	0.00206352		1.41347	0.000765056		1.41003	0.00114852		1.40786	0.00165955		1.40971	0.00179149		1.41193	0.000916631		1.40712	0.000986494		1.41186	0.00219292		1.4168	0.00146814		1.41082	0.000779947		1.41058	0.00117932		1.41343	0.00225345		1.41087	0.00164645		1.40771	0.00109041
1.41591	0.000654679		1.42261	0.00238523		1.4165	0.00206199		1.41878	0.000968235		1.41628	0.00192636		1.41286	0.00167592		1.4147	0.0020312		1.41693	0.0012925		1.41462	0.00148711		1.41624	0.00217833		1.42086	0.000919008		1.41738	0.000784752		1.41683	0.00109827		1.41811	0.00126617		1.41712	0.00200597		1.41271	0.00136323
1.42404	0.000939345		1.42948	0.00204647		1.42338	0.000867477		1.42316	0.000924909		1.42034	0.00221174		1.42036	0.00139689		1.41908	0.00265769		1.42412	0.00184674		1.42212	0.000681298		1.42187	0.00206228		1.42648	0.00136016		1.4255	0.000946507		1.42496	0.00187557		1.42561	0.000463315		1.42494	0.0021487		1.42052	0.00083364
1.42966	0.0012935		1.43761	0.00271222		1.42744	0.00115517		1.42941	0.00109411		1.42628	0.00158329		1.42786	0.000895222		1.42658	0.00259608		1.43193	0.00180967		1.42681	0.000436543		1.42968	0.00172942		1.4343	0.00136467		1.43113	0.000976707		1.43089	0.00109762		1.43311	0.00134779		1.43119	0.0021189		1.42771	0.000646099
1.4331	0.00108401		1.44292	0.00301633		1.43275	0.00130064		1.43753	0.00201833		1.43409	0.00177821		1.43286	0.00082027		1.43439	0.00252243		1.43693	0.000937301		1.4315	0.00114966		1.43655	0.00124909		1.44148	0.0016242		1.43551	0.00116683		1.43464	0.00100881		1.43812	0.00178968		1.43525	0.00144478		1.43239	0.00102322
1.43904	0.000614678		1.44636	0.00260591		1.44057	0.00114327		1.44378	0.00190979		1.44065	0.00157566		1.43724	0.00182648		1.43939	0.00248593		1.44131	0.000918429		1.43931	0.00167484		1.44093	0.00113551		1.44586	0.00199		1.44144	0.000983342		1.43996	0.00185617		1.44249	0.00119447		1.44119	0.00170367		1.43708	0.00231745
1.44685	0.00122091		1.45261	0.00256778		1.44775	0.000717396		1.44785	0.000860375		1.44503	0.0023772		1.44443	0.00249353		1.44346	0.00299215		1.44818	0.000859342		1.44681	0.000577075		1.44624	0.0014511		1.45086	0.00139644		1.44957	0.000730071		1.44746	0.00207087		1.44999	0.00186048		1.44931	0.00198848		1.4449	0.00214032
1.45279	0.0015135		1.46011	0.00310609		1.45213	0.0012352		1.45347	0.000887739		1.45065	0.00199477		1.45224	0.00197241		1.45064	0.00258869		1.45631	0.00103256		1.45119	0.000995678		1.45405	0.00248852		1.45836	0.0018393		1.45582	0.000918366		1.45402	0.0014811		1.4578	0.00161315		1.45556	0.0022029		1.4524	0.00148404
1.45685	0.00123349		1.46605	0.00273858		1.45713	0.00207235		1.46159	0.000622307		1.45878	0.00193605		1.45692	0.00109841		1.45877	0.00189911		1.46162	0.00190179		1.45494	0.000634312		1.46124	0.00265282		1.46586	0.0021261		1.46019	0.00120069		1.45839	0.00138367		1.46249	0.00115457		1.45931	0.00288739		1.45645	0.00147273
1.46247	0.000299494		1.47011	0.00374918		1.46494	0.00214835		1.46847	0.00150548		1.46534	0.00173638		1.46099	0.00159853		1.46377	0.00189594		1.46568	0.00190291		1.46212	0.000605693		1.46561	0.00155367		1.47055	0.00178413		1.46582	0.00212592		1.46371	0.00165204		1.46624	0.00157888		1.46431	0.0029472		1.46052	0.00180595
1.47029	0.000521399		1.47605	0.00412475		1.47244	0.00116361		1.47253	0.000440107		1.46909	0.00237514		1.46755	0.00100378		1.4672	0.00198309		1.47256	0.00125924		1.46962	0.000270384		1.47031	0.00115078		1.47524	0.00164073		1.47394	0.00206804		1.47152	0.00153844		1.4728	0.00194006		1.47212	0.0027492		1.46771	0.00176795
1.47748	0.000710199		1.48386	0.00328124		1.4765	0.00209596		1.47784	0.00116047		1.47409	0.00187444		1.47505	0.000846581		1.47377	0.00241672		1.48068	0.0016414		1.47462	0.00147301		1.47843	0.00110925		1.48274	0.00218063		1.4805	0.00172851		1.47871	0.000812871		1.4803	0.00184221		1.47869	0.00214957		1.4749	0.00193536
1.48185	0.000452431		1.49073	0.00222968		1.48088	0.00179848		1.48597	0.00154881		1.48159	0.00157505		1.48036	0.00101108		1.48158	0.0032941		1.486	0.00119297		1.479	0.00115564		1.48562	0.00164435		1.49024	0.00172939		1.48394	0.000634665		1.4834	0.000463235		1.48562	0.00223316		1.48306	0.00138777		1.47989	0.00125419
1.48685	0.00089262		1.49511	0.00229547		1.48807	0.000859609		1.49284	0.00180102		1.48846	0.00107331		1.48474	0.00171837		1.48721	0.00295775		1.48943	0.00104536		1.48556	0.0011975		1.48968	0.00153504		1.49461	0.00183372		1.48894	0.000254873		1.48808	0.000918279		1.48999	0.00227036		1.48806	0.00115003		1.48427	0.00159443
1.49466	0.000198111		1.50011	0.00257955		1.49557	0.00128183		1.49659	0.00179691		1.49284	0.00104509		1.49099	0.00137412		1.49158	0.00179698		1.49568	0.00080385		1.49337	0.00139378		1.49406	0.00129061		1.49836	0.0014808		1.49675	0.00140935		1.49527	0.000799076		1.49655	0.00223203		1.49588	0.00179242		1.49115	0.00251517
1.50216	0.000377772		1.50792	0.00283356		1.50025	0.00153325		1.50128	0.00201993		1.49784	0.00188124		1.49911	0.00158305		1.49752	0.00210442		1.50349	0.00147582		1.49931	0.00149757		1.50124	0.00302183		1.50524	0.00193848		1.50332	0.00189828		1.50308	0.00109762		1.50436	0.00161315		1.50337	0.00165768		1.49927	0.00193784
1.50685	0.00085848		1.51511	0.00279587		1.50463	0.00161596		1.50878	0.00147493		1.50503	0.00175802		1.50536	0.00103761		1.50533	0.00229138		1.50943	0.00189617		1.50337	0.000460464		1.50843	0.00232871		1.51273	0.00128502		1.508	0.00134849		1.50808	0.000960529		1.51061	0.000852004		1.50806	0.00211631		1.50489	0.00177768
1.51154	0.00125694		1.5198	0.00242357		1.5115	0.00120084		1.51566	0.0015536		1.51284	0.00178975		1.50974	0.00150788		1.51189	0.00252412		1.51381	0.00173553		1.50931	0.00128913		1.51343	0.00193704		1.51805	0.00104287		1.51301	0.000850873		1.51246	0.00116315		1.51468	0.000833742		1.51275	0.00185806		1.50896	0.00193264
1.51904	0.000924345		1.52449	0.00208852		1.51963	0.000835235		1.52034	0.00126103		1.51784	0.00221442		1.51537	0.00170046		1.51627	0.00195798		1.51943	0.00185798		1.51744	0.00146447		1.51781	0.00257471		1.52242	0.000872424		1.5205	0.00148462		1.51964	0.00165527		1.52061	0.00246718		1.51963	0.00112758		1.51521	0.00162113
1.52654	0.000528468		1.5323	0.00162885		1.52557	0.00149448		1.52503	0.00134039		1.52222	0.00215199		1.52318	0.001048		1.52158	0.00164906		1.52724	0.00134799		1.524	0.000630681		1.52468	0.00198732		1.52899	0.000803729		1.528	0.00154251		1.52777	0.00163092		1.52843	0.00182485		1.52744	0.00168705		1.52333	0.00249142
1.53091	0.00062054		1.5398	0.00192034		1.52963	0.00157873		1.53222	0.00154311		1.52878	0.00105086		1.53005	0.00115391		1.52939	0.00216625		1.53412	0.000810365		1.52837	1.17466e-05		1.53281	0.00137141		1.5368	0.00199516		1.533	0.000929576		1.53246	0.00131555		1.5353	0.000979388		1.53275	0.0024862		1.52958	0.00143472
1.53497	0.000364496		1.54417	0.000931957		1.53588	0.00131599		1.54003	0.00150548		1.5369	0.000668633		1.53411	0.000725862		1.53658	0.00203078		1.53849	0.00112534		1.534	0.000933101		1.53843	0.00109376		1.54305	0.0024406		1.53737	0.000791845		1.53589	0.00187989		1.53937	0.00133989		1.53681	0.00104984		1.53364	0.00115352
1.54216	0.000437602		1.54824	0.000861374		1.544	0.00174186		1.54535	0.00158666		1.54222	0.00202279		1.53974	0.00103584		1.54096	0.00235658		1.54381	0.00139517		1.54212	0.000477763		1.54249	0.00143224		1.54711	0.00136488		1.54426	0.000618879		1.54246	0.00176305		1.54468	0.00159849		1.544	0.00185202		1.53958	0.00222651
1.54935	0.000583987		1.55511	0.000997529		1.54994	0.00218865		1.54972	0.00138987		1.54628	0.00153301		1.54786	0.00033452		1.54596	0.00182124		1.55162	0.00220329		1.54869	0.000594587		1.54874	0.00198979		1.55305	0.00105339		1.55207	0		1.55027	0.00119894		1.5528	0.00122423		1.55212	0.00233613		1.54771	0.00188151
1.55466	0.0007552		1.56261	0.00108402		1.554	0.000936569		1.55628	0.000768477		1.55315	0.00107331		1.55443	0.00045944		1.55377	0.00209682		1.55881	0.00191571		1.55212	0.00114539		1.55687	0.00131418		1.56086	0.00172038		1.55738	0.00113228		1.55558	0.00181306		1.55968	0.00167583		1.55712	0.00219815		1.55396	0.00175664
1.55904	0.000224491		1.56761	0.00130949		1.55994	0.001178		1.5641	0.000742937		1.56128	0.00127483		1.55818	0.0014179		1.56095	0.00275159		1.56318	0.00124487		1.55712	0.00107662		1.5628	0.00143224		1.56774	0.00153297		1.56175	0.00128924		1.55996	0.00197171		1.56343	0.00222098		1.56056	0.00170972		1.55739	0.00164601
1.5656	0.000637955		1.57199	0.00222903		1.56838	0.00141138		1.57003	0.00119741		1.5669	0.0023805		1.56286	0.00166486		1.56502	0.00122471		1.56818	0.00195952		1.56462	0.00106616		1.56686	0.00128724		1.5718	0.00189426		1.56862	0.00157728		1.56621	0.00195447		1.56811	0.00206587		1.56681	0.00289646		1.56271	0.00129175
1.57372	0.000803478		1.57886	0.00240461		1.57432	0.00207139		1.57409	0.00160764		1.57034	0.00158803		1.57036	0.00200447		1.56939	0.00126206		1.57568	0.00131788		1.5715	0.00148647		1.57281	0.00179788		1.57742	0.00177769		1.57675	0.00186419		1.57402	0.00115065		1.57561	0.00171122		1.57463	0.00225861		1.57021	0.0014872
1.57966	0.000798306		1.58667	0.00245799		1.57775	0.00170252		1.58066	0.00169954		1.57628	0.0012773		1.57755	0.00266577		1.57658	0.00228336		1.58318	0.00129699		1.57587	0.00123104		1.58124	0.00210718		1.58555	0.00117296		1.58207	0.0012389		1.58027	0.00174732		1.58249	0.00162375		1.58025	0.00178119		1.57677	0.000921415
1.58341	0.00115815		1.59261	0.0024057		1.58338	0.00152116		1.58878	0.00142294		1.58409	0.00217857		1.58224	0.00152004		1.58377	0.00185416		1.58756	0.00116197		1.58087	0.000809442		1.58718	0.00142663		1.59211	0.000629631		1.5855	0.000943075		1.58465	0.00137246		1.58718	0.00151462		1.58462	0.00180343		1.58114	0.000531177
1.58966	0.000181386		1.59667	0.00136853		1.59088	0.00164456		1.59441	0.00125852		1.59003	0.00234073		1.58693	0.0019755		1.58877	0.00159124		1.59162	0.00069646		1.58806	0.000958943		1.59093	0.000891981		1.59586	0.0013608		1.59176	0.00135467		1.58996	0.00170421		1.59186	0.00154078		1.59056	0.00240587		1.58615	0.000987699
1.59779	0.000446913		1.60261	0.00109229		1.59744	0.00155551		1.59784	0.00180216		1.5944	0.00170445		1.59411	0.00208362		1.59346	0.00213037		1.59849	0.000757569		1.59587	0.000631963		1.59624	0.00152606		1.60055	0.00137239		1.59957	0.000774914		1.59808	0.00151947		1.59905	0.00174707		1.59837	0.0015983		1.59396	0.000752425
1.60435	0.000848308		1.61074	0.00174867		1.60182	0.0010237		1.60378	0.00180102		1.60003	0.0014304		1.60192	0.00167459		1.60033	0.00308288		1.60599	0.00297636		1.60087	0.00118576		1.60374	0.00207642		1.60805	0.00210185		1.6055	0.000508373		1.60496	0.000717163		1.60686	0.00215132		1.60494	0.00230655		1.60146	0.00111325
1.6081	0.000930552		1.61698	0.00092956		1.60682	0.000554456		1.6116	0.000910086		1.60784	0.00156124		1.60724	0.00149749		1.60814	0.00361991		1.611	0.00182383		1.60525	0.00119174		1.6103	0.00222658		1.61492	0.00201169		1.60956	0.00103047		1.60902	0.00145028		1.61186	0.00205347		1.60931	0.00192025		1.60614	0.00186093
1.61404	0.00161351		1.62105	0.000292135		1.61463	0.000888205		1.61753	0.000438967		1.61471	0.00211057		1.61161	0.00101329		1.61377	0.00281679		1.61537	0.00122599		1.61212	0.000943566		1.61499	0.00202862		1.61961	0.00105854		1.6155	0.000928203		1.61433	0.000975618		1.61624	0.00134418		1.61462	0.00282305		1.61052	0.00241201
1.62247	0.00136798		1.62698	0.00100254		1.62213	0.000720275		1.62159	0.000962078		1.61909	0.0020026		1.61818	0.00110394		1.61783	0.00235341		1.62224	0.0011368		1.61993	0.000786804		1.61999	0.00146681		1.6243	0.00123887		1.62331	0.000842407		1.62246	0.000932937		1.62311	0.000506152		1.62244	0.00231626		1.61771	0.00279162
1.62872	0.00123229		1.63511	0.00176479		1.62682	0.00121025		1.62722	0.000908718		1.6244	0.00164922		1.6263	0.00116739		1.62439	0.0017611		1.63037	0.00138169		1.62525	0.00142624		1.62749	0.00197677		1.63149	0.0019666		1.63019	0.00151322		1.62933	0.00109137		1.63124	0.00167064		1.62931	0.00199539		1.62552	0.00206114
1.63216	0.00109125		1.64136	0.0018003		1.63119	0.000841952		1.63503	0.00127722		1.63221	0.00125423		1.63193	0.00108713		1.63221	0.00257814		1.63631	0.00107502		1.62962	0.000812219		1.63499	0.00143112		1.6393	0.00255523		1.63425	0.00118125		1.63308	0.00117867		1.63655	0.00186115		1.63368	0.00238579		1.63083	0.00202042
1.63716	0.00109539		1.64511	0.0018345		1.63869	0.00156108		1.64222	0.000820241		1.6394	0.00200054		1.63599	0.00147825		1.63814	0.00199153		1.64006	0.00130148		1.6365	0.000870738		1.63968	0.00180147		1.64461	0.00138055		1.63956	0.000998671		1.63746	0.000908795		1.64062	0.00178224		1.63869	0.00216684		1.6349	0.00189079
1.64497	0.00145126		1.65011	0.00169465		1.6465	0.0016532		1.6466	0.0019985		1.64409	0.00176255		1.64224	0.00151341		1.64221	0.00219642		1.64631	0.00100448		1.64462	0.00104266		1.64437	0.000968744		1.64867	0.00171501		1.64737	0.00102452		1.64496	0.00178138		1.64749	0.00177751		1.6465	0.00271983		1.64209	0.00111959
1.65154	0.00152419		1.65761	0.00193079		1.6515	0.0016388		1.65159	0.00120608		1.64878	0.000516155		1.65068	0.000932145		1.64846	0.00184846		1.65443	0.00121207		1.64994	0.000446795		1.65156	0.000745637		1.65555	0.00218643		1.65456	0.000885191		1.65183	0.00161583		1.65562	0.000864179		1.654	0.00279109		1.6499	0.00116053
1.65623	0.001024		1.66417	0.00210769		1.65588	0.00176835		1.65909	0.000625499		1.65659	0.000317111		1.6563	0.00125141		1.65689	0.00195566		1.66068	0.00171239		1.65337	0.000301779		1.65937	0.00170136		1.66367	0.00164095		1.65894	0.00114098		1.65683	0.00184109		1.66124	0.00138521		1.65806	0.00225084		1.6549	0.00165619
1.66122	0.000673818		1.66886	0.00173103		1.66306	0.00140946		1.6666	0.0014275		1.66409	0.00114687		1.65974	0.0016034		1.66283	0.00155832		1.66474	0.00218666		1.65962	0.000533292		1.66468	0.00199338		1.66898	0.00133933		1.66394	0.00174727		1.66152	0.00151602		1.66468	0.00228727		1.66244	0.0013245		1.65864	0.00182812
1.66841	0.000738648		1.67386	0.00252051		1.67119	0.00122982		1.67128	0.00159373		1.66846	0.00140979		1.66568	0.00133344		1.66627	0.00234772		1.67068	0.00224597		1.66712	0.0013989		1.66874	0.00116357		1.67305	0.00104566		1.67175	0.000920196		1.66839	0.000661549		1.67062	0.00235874		1.66962	0.00110901		1.66521	0.00210548
1.67591	0.000448982		1.68136	0.00216476		1.67588	0.000713558		1.67597	0.00178027		1.67253	0.000895082		1.67318	0.0022459		1.67189	0.00231543		1.67881	0.00196447		1.67306	0.000999095		1.67592	0.000584478		1.67992	0.00111049		1.67925	0.000282099		1.67621	0.000808345		1.67843	0.00263447		1.6765	0.00198784		1.67271	0.00223963
1.68091	0.00222801		1.68886	0.00161099		1.67932	0.000659437		1.68347	0.00133286		1.6794	0.00103169		1.67911	0.00241526		1.67939	0.00269356		1.68506	0.00184		1.67744	0.00111314		1.68405	0.00156534		1.68805	0.00121719		1.683	0.000831654		1.68183	0.0015143		1.68436	0.00206023		1.6815	0.00271011		1.67833	0.00153154
1.6856	0.00200163		1.69354	0.00138857		1.68588	0.00175396		1.69128	0.000840992		1.6869	0.00143349		1.68349	0.00107254		1.68595	0.00172523		1.68881	0.00158995		1.68337	0.00185915		1.68906	0.00122013		1.69336	0.00125647		1.68737	0.00125148		1.6859	0.000897155		1.68874	0.00218807		1.68619	0.00155598		1.6827	0.000675961
1.69247	0.00069175		1.69823	0.00108031		1.69369	0.00134613		1.69566	0.00132899		1.69222	0.000623302		1.68911	0.00189303		1.69033	0.00148405		1.69381	0.000932807		1.69119	0.00145208		1.69249	0.00041726		1.6968	0.00176696		1.69456	0.00143909		1.69246	0.00118816		1.69437	0.00177413		1.69306	0.00129168		1.68865	0.00128292
1.7006	0.000784684		1.70511	0.000760728		1.69932	0.00136263		1.69941	0.0010843		1.69659	0.00216517		1.69693	0.00205532		1.69564	0.00185648		1.70162	0.000963811		1.69806	0.00115693		1.69906	0.00155704		1.70305	0.000604085		1.70206	0.00173126		1.70027	0.00179905		1.70218	0.00191639		1.70087	0.00166999		1.69646	0.00258643
1.70591	0.00111677		1.71292	0.000257062		1.70369	0.0011519		1.70628	0.00135453		1.70315	0.00151838		1.70411	0.00186385		1.70314	0.00274632		1.70818	0.001973		1.70212	0.00131881		1.70687	0.00158846		1.71055	0.00135586		1.70675	0.00109408		1.70621	0.00235649		1.70905	0.00253865		1.7065	0.00131543		1.70333	0.00214009
1.70998	0.000457948		1.71823	0.000808655		1.70963	0.00152672		1.71378	0.0012697		1.71128	0.0015326		1.70849	0.0012932		1.71033	0.00268048		1.71287	0.00153109		1.70744	0.00101234		1.71249	0.00117053		1.71649	0.000989205		1.71113	0.00134003		1.71027	0.0013453		1.71342	0.00212742		1.71056	0.0012634		1.70739	0.00150598
1.71685	0.000190179		1.72261	0.00219025		1.71775	0.00079973		1.71909	0.00144027		1.71721	0.00105374		1.71349	0.00221672		1.71502	0.00217384		1.71787	0.0011559		1.71525	0.000764592		1.71686	0.00112698		1.72086	0.000642726		1.718	0.00147799		1.71683	0.00157056		1.71843	0.00119538		1.71681	0.00212322		1.71271	0.00134649
1.72497	0.00119004		1.72948	0.00281766		1.724	0.00057576		1.72347	0.00155292		1.72128	0.00118335		1.72099	0.00218886		1.71971	0.00287356		1.72537	0.00123206		1.72275	0.00104587		1.72311	0.00154469		1.72649	0.000834427		1.72612	0.00157362		1.72496	0.000889179		1.72624	0.00151801		1.72494	0.00240544		1.72084	0.00109289
1.72997	0.00118711		1.73761	0.00260961		1.72838	0.000923902		1.73003	0.00141724		1.72722	0.000856138		1.7288	0.00139844		1.7272	0.00245786		1.73287	0.000990771		1.72681	0.000539913		1.73124	0.00145514		1.7343	0.00140567		1.73176	0.0011769		1.73058	0.00140264		1.73374	0.00144992		1.73088	0.00238968		1.72771	0.00103294
1.73372	0.000708475		1.74261	0.00199637		1.73369	0.00162249		1.73784	0.00100814		1.73534	0.00185218		1.73349	0.00173429		1.73502	0.00235362		1.73756	0.000490892		1.73181	0.000752205		1.73749	0.00152494		1.74117	0.00123715		1.73581	0.00102315		1.73402	0.000981223		1.73811	0.00224218		1.73494	0.00239119		1.73208	0.00124243
1.73997	0.0012616		1.74636	0.00209265		1.74182	0.00107705		1.74378	0.00118692		1.7419	0.00225831		1.73787	0.00200314		1.73971	0.00236143		1.74224	0.000858668		1.73994	0.00154563		1.74187	0.00115684		1.74555	0.00152975		1.74206	0.00194197		1.73964	0.00182578		1.7428	0.00174279		1.74119	0.00265462		1.73708	0.00145214
1.74747	0.00141074		1.75261	0.0011949		1.74869	0.0012588		1.74785	0.000984653		1.74596	0.00202856		1.74536	0.00188264		1.74408	0.00249964		1.74912	0.000903151		1.74712	0.00102131		1.74718	0.00132652		1.75086	0.00102463		1.75019	0.00170518		1.74746	0.00153693		1.75062	0.00103215		1.74931	0.00170324		1.74489	0.00172157
1.75341	0.00119746		1.76042	0.00136526		1.75275	0.00143786		1.75378	0.00162999		1.75159	0.00252391		1.75318	0.000788653		1.75127	0.00278029		1.75693	0.00162545		1.75119	0.000731488		1.75499	0.00156332		1.75836	0.00122062		1.75644	0.000967556		1.75371	0.00110409		1.75843	0.00133944		1.75525	0.00251708		1.75239	0.00117139
1.75747	0.000641231		1.76605	0.00168702		1.75807	0.00129104		1.76191	0.00151073		1.75971	0.00180314		1.75755	0.000730284		1.75939	0.00218524		1.76224	0.00120982		1.75525	0.00148177		1.76186	0.00176376		1.76586	0.00150935		1.7605	0.000912646		1.75808	0.00129055		1.76249	0.00149839		1.759	0.0019345		1.75615	0.000852869
1.76341	0.000913482		1.77042	0.00199332		1.76619	0.00150312		1.76847	0.0008134		1.76628	0.00101851		1.7613	0.00117093		1.76439	0.00215992		1.76662	0.00163848		1.76243	0.00131198		1.76624	0.00203109		1.77023	0.000889598		1.76644	0.00159513		1.76371	0.000954062		1.76655	0.00164494		1.76431	0.00226444		1.76052	0.000855131
1.77154	0.000949173		1.77636	0.00162798		1.77307	0.00147913		1.77253	0.00086562		1.77003	0.00178831		1.76818	0.00146853		1.76783	0.00197359		1.77381	0.00146481		1.76994	0.000953177		1.77155	0.00153302		1.77492	0.00144087		1.77456	0.00121259		1.77121	0.0010239		1.77343	0.0012576		1.77181	0.00237305		1.76771	0.00182994
1.7781	0.000384325		1.78417	0.00126657		1.77682	0.00103387		1.77816	0.000359611		1.77503	0.00194058		1.77568	0.00253643		1.77471	0.00211286		1.78162	0.00113838		1.77462	0.0016663		1.77936	0.00065159		1.78274	0.00148252		1.78081	0.00143955		1.77839	0.00142829		1.78093	0.000870492		1.77837	0.00193731		1.7749	0.00216746
1.78247	0.000240354		1.79074	0.00117638		1.7815	0.000886477		1.78659	0.000373293		1.78253	0.00153054		1.78099	0.00230427		1.78252	0.00124244		1.78662	0.000999757		1.779	0.000967913		1.78655	0.000832725		1.79024	0.00153168		1.78457	0.00113663		1.78308	0.00172361		1.78593	0.000564771		1.78306	0.00178508		1.7799	0.0025482
1.78779	0.00109987		1.79511	0.000928907		1.789	0.000858457		1.79316	0.00105945		1.7894	0.00177492		1.78536	0.00111146		1.78783	0.00153828		1.79037	0.00100762		1.78587	0.000972612		1.79062	0.00230649		1.79461	0.000868131		1.78988	0.00145671		1.78777	0.00148778		1.79061	0.00177841		1.78806	0.00189715		1.78427	0.00271266
1.7956	0.000294149		1.80042	0.000706702		1.79588	0.00112407		1.79691	0.000664721		1.79378	0.00188227		1.79193	0.000923965		1.79221	0.00224432		1.79662	0.0010712		1.794	0.00161718		1.79499	0.002324		1.79867	0.00186549		1.79769	0.00131303		1.79558	0.00108663		1.79718	0.00206023		1.79587	0.00203232		1.79115	0.00244278
1.80279	0.000871067		1.80823	0.00101626		1.80088	0.00151597		1.80191	0.00103208		1.79878	0.00172608		1.80005	0.00131995		1.79846	0.00182166		1.80412	0.00186629		1.79962	0.00113343		1.80218	0.00180169		1.80555	0.00192109		1.80425	0.00171135		1.80308	0.000973678		1.80499	0.00207241		1.80337	0.0025337		1.79927	0.00219913
1.80716	0.00113953		1.81542	0.00202381		1.80556	0.0012542		1.80941	0.000572139		1.80628	0.00162718		1.80599	0.00235203		1.80627	0.00220613		1.81006	0.00198671		1.804	0.00132672		1.80936	0.00243308		1.81305	0.00199623		1.80863	0.00221103		1.80777	0.000906855		1.81093	0.00156062		1.80806	0.00285263		1.8049	0.00235908
1.81185	0.000218111		1.8198	0.00201728		1.81244	0.00046387		1.81597	0.00156546		1.81378	0.00155547		1.81005	0.00208959		1.81252	0.00181428		1.81443	0.00183057		1.80994	0.00135768		1.81437	0.00218551		1.81805	0.001747		1.81394	0.00166834		1.81215	0.00109051		1.81499	0.0012833		1.81244	0.00201008		1.80896	0.00172451
1.81966	0.00012966		1.8248	0.00128444		1.82025	0.00162307		1.82066	0.00134518		1.81878	0.00123692		1.81599	0.000895443		1.81689	0.00193498		1.82037	0.00153334		1.81806	0.000811151		1.81905	0.00122934		1.82242	0.00173454		1.82144	0.000752035		1.81965	0.000950182		1.82093	0.00199575		1.81994	0.00148645		1.8152	0.00097684
1.82716	0.000292769		1.83261	0.00098533		1.82588	0.00149544		1.82534	0.00130413		1.82315	0.00101129		1.82411	0.00120631		1.82252	0.00234434		1.82818	0.0014037		1.82431	0.00126969		1.82593	0.00166343		1.8293	0.00165533		1.82894	4.09536e-05		1.82746	0.00178138		1.82905	0.00188573		1.82744	0.00166481		1.82333	0.0010015
1.83154	0.000286045		1.84011	0.00137615		1.82994	0.00110277		1.83253	0.00197501		1.83003	0.00165293		1.83036	0.00193195		1.83033	0.00295269		1.83475	0.00190808		1.82837	0.000291314		1.83374	0.00183199		1.83711	0.001671		1.83363	0.000801911		1.83214	0.0018344		1.83562	0.0011354		1.83244	0.00213963		1.82927	0.0015458
1.8356	0.00060416		1.84386	0.00215431		1.8365	0.00124441		1.84034	0.00199895		1.83815	0.00104179		1.83474	0.00225961		1.83721	0.00208606		1.83912	0.00102088		1.83431	0.000452775		1.83937	0.00207553		1.84305	0.0019314		1.838	0.000588907		1.83589	0.00101679		1.83967	0.00236618		1.83681	0.00262936		1.83333	0.00156231
1.84279	0.00141247		1.84823	0.00171055		1.84463	0.00126801		1.84535	0.000993091		1.84346	0.000864998		1.84036	0.0014316		1.84158	0.00218629		1.84443	0.000798458		1.84243	0.00162273		1.84343	0.00231188		1.84711	0.00123264		1.84519	0.00167223		1.84246	0.00117997		1.8453	0.00144518		1.844	0.00272523		1.83958	0.001796
1.84997	0.000648128		1.85542	0.00167177		1.85056	0.000756164		1.84972	0.000929241		1.84753	0.00114852		1.84849	0.00229012		1.84689	0.00247664		1.85224	0.00114377		1.84869	0.00121352		1.84999	0.00154537		1.85305	0.00141039		1.853	0.00179372		1.84996	0.00114268		1.85374	0.00101704		1.85213	0.00183301		1.84802	0.00145463
1.85497	0.000531916		1.86292	0.000499745		1.85463	0.00163132		1.85659	0.000795841		1.8544	0.0014576		1.85505	0.00163634		1.85502	0.00250365		1.85943	0.00132058		1.85243	0.000750282		1.8578	0.00155636		1.86117	0.00162807		1.85831	0.00151437		1.85527	0.000749066		1.8603	0.00180096		1.85681	0.00202001		1.85395	0.00179238
1.85935	0.00041536		1.86761	0.000624573		1.86088	0.00242414		1.86472	0.000927189		1.86253	0.00127318		1.8588	0.000749961		1.86221	0.00260072		1.86381	0.00168341		1.85775	0.000263763		1.86374	0.00206722		1.86742	0.00110405		1.86238	0.00103688		1.85964	0.00113578		1.86374	0.00202664		1.86056	0.00324583		1.85739	0.0013164
1.86623	0.000799512		1.8723	0.00109251		1.86932	0.00110277		1.87003	0.000151415		1.86753	0.00134901		1.8638	0.00069115		1.86595	0.00203331		1.86881	0.00188134		1.86556	0.000851516		1.8678	0.00152943		1.8718	0.00125712		1.86956	0.00141004		1.86621	0.00177383		1.86874	0.00221647		1.86713	0.00334127		1.8627	0.0014121
1.87435	0.000612437		1.87917	0.00166327		1.87494	0.00155129		1.87441	0.000987162		1.87128	0.000970908		1.8713	0.00141369		1.87064	0.00229665		1.87662	0.00129205		1.87212	0.00114582		1.87405	0.00193524		1.87742	0.00130585		1.87769	0.000997527		1.87402	0.00153219		1.87624	0.00135387		1.87494	0.00229769		1.87052	0.00120895
1.87997	0.000309322		1.88698	0.00183973		1.87838	0.00159332		1.88128	0.00100472		1.87753	0.00181942		1.87786	0.00140065		1.87814	0.00337788		1.88381	0.00148953		1.87619	0.000930538		1.88249	0.00139162		1.88586	0.00137755		1.88269	0.000853389		1.88027	0.00104632		1.88312	0.00124701		1.88025	0.00303746		1.87709	0.00143495
1.88404	0.000532779		1.89261	0.0023068		1.884	0.00119163		1.88941	0.00123298		1.88534	0.00159462		1.88255	0.00147206		1.88502	0.00315969		1.88787	0.0019393		1.8815	0.000776552		1.88811	0.00148319		1.89211	0.0013095		1.88644	0.00056946		1.88433	0.000988336		1.88749	0.000693282		1.88462	0.00260712		1.88115	0.00252716
1.89029	0.000630024		1.89667	0.00182492		1.89182	0.00157739		1.89472	0.00134449		1.89096	0.00259396		1.88755	0.00181101		1.88971	0.00238042		1.89225	0.00184225		1.889	0.000310108		1.89155	0.00103204		1.89555	0.00216518		1.893	0.0016871		1.89027	0.00162445		1.89249	0.000659238		1.89088	0.00192306		1.88646	0.00250273
1.89841	0.000587608		1.90292	0.00165914		1.89807	0.00159466		1.89816	0.00150754		1.89534	0.00198014		1.89474	0.00192045		1.89439	0.00202761		1.89943	0.00105817		1.8965	0		1.89718	0.00107558		1.90086	0.00192303		1.90081	0.00159902		1.89808	0.00211226		1.89999	0.00160255		1.89869	0.00150718		1.89427	0.00116958
1.90435	0.000235526		1.91105	0.00164606		1.90244	0.000907973		1.90441	0.00157982		1.90128	0.00172134		1.90255	0.000923743		1.90158	0.00202761		1.90693	0.000842492		1.90118	0.00100742		1.90499	0.000738229		1.90836	0.00129833		1.90644	0.00199368		1.90465	0.00172361		1.90749	0.00036975		1.90494	0.00163674		1.90145	0.000538642
1.90841	5.43123e-05		1.91698	0.00112889		1.90775	0.00135092		1.91191	0.0014487		1.9094	0.00258284		1.90755	0.00109974		1.90939	0.00235088		1.91162	0.00178271		1.90556	0.000968341		1.91155	0.00124572		1.91492	0.00144753		1.91082	0.001761		1.90902	0.00120001		1.91249	0.000503898		1.90931	0.00202174		1.90615	0.000915081
1.91466	0.00123108		1.92073	0.00176022		1.91525	0.0010333		1.91784	0.00136889		1.91596	0.00253545		1.91193	0.00123637		1.9147	0.00195523		1.91631	0.00173104		1.91306	0.00082247		1.91593	0.00121564		1.91961	0.000537966		1.91675	0.00164569		1.91433	0.00112134		1.91686	0.00145037		1.91463	0.00245251		1.91083	0.000815089
1.92279	0.000236905		1.92699	0.001821		1.92275	0.00104596		1.92222	0.000751146		1.92034	0.000882924		1.9188	0.000936346		1.91908	0.00198267		1.92318	0.00136102		1.92087	0.00138438		1.92124	0.00147623		1.92461	0		1.92457	0.00143543		1.92246	0.00100774		1.92374	0.00167695		1.92244	0.00270428		1.91802	0.000225547
1.92904	0.000844687		1.93542	0.000831747		1.92744	0.00130736		1.92785	0.00118418		1.92565	0.000191215		1.92661	0.00125274		1.92564	0.0013279		1.931	0.00133428		1.92587	0.00145636		1.92905	0.00174446		1.9318	0.00118799		1.93113	0.000901206		1.92933	0.000918064		1.93186	0.00269422		1.92931	0.00285824		1.92583	0.000698131
1.93247	0.00039467		1.94136	0.000515213		1.93213	0.00135898		1.93566	0.000534285		1.93346	0.0013247		1.93224	0.00137589		1.93377	0.00166383		1.93662	0.00155872		1.92993	0.000986708		1.93624	0.00135682		1.93961	0.00193161		1.93551	0.000942846		1.93308	0.000936387		1.93718	0.00185056		1.93369	0.00241667		1.93084	0.00106394
1.93779	6.65542e-05		1.94511	0.000700602		1.93963	0.00138604		1.94253	0.000564386		1.94065	0.0014578		1.9363	0.00150346		1.93939	0.0016231		1.94099	0.000784528		1.93712	0.00115052		1.94093	0.00151215		1.94461	0.000927166		1.94082	0.000849957		1.93777	0.000565841		1.94124	0.00176781		1.939	0.00224846		1.93521	0.000973899
1.9456	0.000583815		1.95042	0.000959406		1.94713	0.00152595		1.94691	0.000820925		1.94503	0.0016313		1.94318	0.00150036		1.94346	0.00144522		1.94725	0.000654448		1.94524	0.00117978		1.94562	0.00217047		1.94899	0.000563727		1.94863	0.00142925		1.94527	0.000622318		1.94811	0.00192654		1.94712	0.0026015		1.94239	0.00172157
1.95216	0.00063692		1.95792	0.000764431		1.95213	0.00156971		1.95191	0.000651039		1.95003	0.00105477		1.9513	0.000841274		1.95002	0.00117027		1.95537	0.000921125		1.95025	0.000966205		1.95312	0.000932607		1.95586	0.00134535		1.9555	0.00202869		1.95215	0.000818476		1.95624	0.00101366		1.954	0.00244409		1.95052	0.000837485
1.95654	0.00093469		1.96448	0.0015208		1.9565	0.00114519		1.95972	0.00144916		1.95784	0.000856756		1.95662	0.00118641		1.95814	0.00192696		1.96131	0.000711288		1.954	0.00107684		1.96062	0.00162303		1.96367	0.00117168		1.95987	0.0015242		1.95683	0.000510658		1.96155	0.00160999		1.95775	0.00261252		1.95521	0.000980912
1.96154	0.00043743		1.96886	0.00157788		1.964	0.00127665		1.96691	0.00218298		1.96534	0.000816989		1.96005	0.00157001		1.96377	0.00203457		1.96537	0.000855523		1.96025	0.00143863		1.96561	0.00269457		1.96898	0.00107035		1.96519	0.000662349		1.96152	0.000752084		1.9653	0.00154664		1.96244	0.00175787		1.95896	0.00149354
1.96904	0.000424498		1.97417	0.00176501		1.97182	0.00150734		1.97159	0.00166671		1.9694	0.00103581		1.9663	0.00127684		1.96752	0.00233379		1.97162	0.00077689		1.96806	0.00123531		1.96999	0.00230043		1.97336	0.00168281		1.973	0.00146632		1.96871	0.00147399		1.97124	0.00172655		1.96994	0.00211178		1.96552	0.00230026
1.97654	0.00115608		1.98167	0.00117529		1.9765	0.00136493		1.97628	0.0020197		1.97347	0.00120519		1.9738	0.00102655		1.97314	0.0024663		1.97974	0.00092045		1.97368	0.00129019		1.97749	0.00195185		1.98024	0.00187515		1.98019	0.00136336		1.97652	0.00127115		1.97905	0.00102471		1.97681	0.00283211		1.97302	0.00265204
1.98122	0.000793478		1.98917	0.00189942		1.98025	0.00157221		1.98409	0.00184982		1.98065	0.00101047		1.97974	0.0013991		1.98095	0.00218503		1.986	0.0014756		1.97806	0.00110417		1.9853	0.00157993		1.98836	0.00151086		1.98425	0.000954515		1.98183	0.00188959		1.98499	0.000824048		1.9815	0.00267816		1.97834	0.0022109
1.98591	0.000754683		1.99386	0.00151906		1.98682	0.00130697		1.99159	0.00100563		1.98815	0.000755586		1.98412	0.00167901		1.98689	0.00230678		1.98943	0.00100313		1.98399	0.00112489		1.98999	0.0014814		1.99367	0.00115236		1.98863	0.00121213		1.98621	0.00123386		1.98936	0.00135432		1.98619	0.00300766		1.98271	0.00122976
1.9931	0.000552089		1.99823	0.000840896		1.99463	0.00100739		1.99597	0.00176613		1.99315	0.000797826		1.98974	0.0019021		1.99127	0.0025889		1.99475	0.00111816		1.99181	0.00125346		1.99374	0.00220638		1.99711	0.00186957		1.99582	0.000545437		1.99277	0.0017831		1.99499	0.00199507		1.99337	0.002272		1.98896	0.00116913
2.00091	0.00183265		2.00573	0.00126243		1.99994	0.00141714		2.00003	0.000677035		1.99753	0.00149324		1.99755	0.000917111		1.99689	0.00196663		2.00225	0.00158231		1.99837	0.000835925		2.0003	0.00133595		2.00336	0.00210013		2.003	0.00107188		2.00058	0.00167532		2.0028	0.00156806		2.00119	0.00261316		1.99708	0.0016528
2.00591	0.000978312		2.01354	0.000533294		2.004	0.00104232		2.00691	0.00138668		2.0044	0.00149943		2.00442	0.000940326		2.0047	0.00263765		2.00881	0.000761164		2.00275	0.000522614		2.00812	0.00196465		2.01086	0.00170878		2.008	0.00176992		2.00621	0.00167489		2.00967	0.00233304		2.0065	0.00301997		2.00333	0.0017813
2.01029	0.000137591		2.01855	0.000633069		2.01056	0.000915074		2.01441	0.00181196		2.01253	0.00188762		2.0088	0.000625484		2.01189	0.00252855		2.01318	0.000780934		2.00806	0.00115052		2.01343	0.00208338		2.0168	0.00166886		2.01238	0.00203532		2.01027	0.00152702		2.01405	0.00147652		2.01087	0.00305409		2.00771	0.00177157
2.01747	0.000817099		2.02292	0.000980319		2.01869	0.000761922		2.01941	0.00243062		2.01815	0.00209244		2.0138	0.00113312		2.01627	0.00265685		2.01849	0.0019575		2.01618	0.00107534		2.01781	0.00176286		2.02117	0.00224632		2.01925	0.00150979		2.01714	0.0013384		2.01936	0.000776927		2.01744	0.00219837		2.01302	0.00144852
2.0256	0.000308287		2.03011	0.000970516		2.02494	0.000532385		2.02378	0.0015178		2.02222	0.00233084		2.02161	0.0019702		2.02096	0.00254965		2.026	0.000789022		2.02306	0.0013564		2.02405	0.00178306		2.02711	0.00174184		2.02738	0.0020717		2.02527	0.000891765		2.02686	0.00036434		2.02525	0.00244582		2.02114	0.00179012
2.03029	0.00101314		2.03792	0.000817804		2.029	0.000998751		2.03034	0.000433266		2.02847	0.00209656		2.02911	0.00178182		2.02846	0.0027269		2.0335	0.000526164		2.02743	0.00231684		2.03249	0.00173885		2.03492	0.000815751		2.033	0.00153152		2.03058	0.000728803		2.03405	0.000952558		2.03119	0.00269565		2.02802	0.00158018
2.03404	0.00115608		2.04261	0.00031087		2.03463	0.00119566		2.03847	0.00135316		2.03659	0.00160925		2.03349	0.00226381		2.03595	0.00290985		2.03818	0.000379234		2.03243	0.00223205		2.03874	0.00204074		2.04149	0.00100273		2.03707	0.00112176		2.03433	0.00105688		2.03874	0.00050773		2.03525	0.00253284		2.03208	0.00161525
2.0406	0.000576401		2.04636	0.000830875		2.04275	0.00176355		2.04409	0.00155542		2.04253	0.00167725		2.03818	0.00260054		2.04064	0.00175372		2.04287	0.000931235		2.04025	0.000893376		2.04249	0.00266786		2.04586	0.00173776		2.04332	0.000890911		2.03996	0.000898663		2.04343	0.000876128		2.04181	0.00258984		2.0374	0.0024145
2.0481	0.000458638		2.05292	0.00112867		2.04932	0.00132405		2.04847	0.0010029		2.04659	0.00176441		2.04599	0.00152712		2.04533	0.00175815		2.05037	0.00171149		2.04743	0.00076032		2.04812	0.0025406		2.05117	0.00152846		2.05144	0.00100256		2.04777	0.000954062		2.05124	0.00181178		2.04994	0.0028021		2.04552	0.00154987
2.05341	0.00127936		2.06073	0.000438312		2.05338	0.00140696		2.05441	0.00112193		2.05284	0.000931964		2.05349	0.00138385		2.05283	0.00228483		2.05818	0.000870351		2.0515	0.00112916		2.05624	0.00126053		2.05898	0.000739328		2.05738	0.00153839		2.05371	0.00164299		2.05874	0.00109775		2.05556	0.00244971		2.05271	0.00120193
2.05779	0.00165472		2.06605	0.000664221		2.059	0.000666154		2.06253	0.00123435		2.06096	0.0012023		2.05786	0.00123439		2.06064	0.00297252		2.06318	0.00108423		2.05587	0.00159945		2.06312	0.00138376		2.06617	0.00195866		2.06112	0.00127757		2.05808	0.00154599		2.0628	0.00114036		2.05931	0.00295087		2.05646	0.000713967
2.06404	0.000936587		2.07042	0.000540919		2.06713	0.000892811		2.06878	0.00135065		2.0669	0.00189051		2.06193	0.00151076		2.06502	0.00213649		2.06756	0.00142392		2.06337	0.000188372		2.06718	0.00183446		2.07055	0.00167959		2.06738	0.000777888		2.06371	0.00227199		2.06686	0.00149478		2.06494	0.00255745		2.06083	0.00211249
2.07185	0.000872791		2.07667	0.000635901		2.074	0.000449284		2.07285	0.00164231		2.07065	0.002064		2.06911	0.00152424		2.06877	0.00260051		2.07474	0.00173643		2.07024	0.000699025		2.07249	0.0013364		2.07555	0.000780545		2.07582	0.00238102		2.07152	0.00176693		2.07405	0.00238467		2.07244	0.00302559		2.06833	0.00239391
2.07841	0.000289666		2.08448	0.00105264		2.07775	0.00121044		2.07878	0.00136091		2.07596	0.00277714		2.0763	0.00148422		2.07564	0.00180499		2.08256	0.000672196		2.07525	0.000530943		2.08062	0.00110252		2.08336	0.000934035		2.08175	0.00202068		2.07839	0.0018551		2.08155	0.00149591		2.07869	0.00339094		2.07521	0.000433221
2.08247	8.8624e-05		2.09073	0.000488417		2.08244	0.000974185		2.08691	0.000609308		2.08346	0.00212953		2.0813	0.00115855		2.08314	0.0014007		2.08725	0.001155		2.07993	0.00131091		2.08749	0.00136199		2.09086	0.00203144		2.08519	0.00176832		2.08277	0.00184583		2.08655	0.00120462		2.08306	0.00330284		2.0799	0.000766903
2.08779	0.000418808		2.09511	0.00143954		2.08994	0.000191344		2.09347	0.000566894		2.09003	0.0011104		2.08568	0.000864711		2.08845	0.00210505		2.091	0.00132215		2.08681	0.000851089		2.09124	0.00222591		2.09461	0.00153576		2.09082	0.00185298		2.08777	0.001416		2.09093	0.000756185		2.08869	0.0040046		2.08458	0.00119266
2.09591	0.0001888		2.10042	0.00110885		2.09682	0.000365415		2.09691	0.00141746		2.09472	0.00114749		2.09255	0.0014358		2.09283	0.00184762		2.09756	0.00099796		2.09462	0.0014476		2.09593	0.00198013		2.09899	0.00116373		2.09863	0.00183925		2.09558	0.00146019		2.0978	0.000789101		2.09619	0.00308173		2.09177	0.00144784
2.10279	0.000450879		2.10823	0.000742864		2.1015	0.000888205		2.10191	0.00204045		2.09971	0.00185898		2.10036	0.00149241		2.09939	0.00234096		2.10506	0.00171352		2.10025	0.00157211		2.10343	0.000656304		2.10617	0.00128889		2.10488	0.00166926		2.10308	0.00170981		2.10593	0.00111737		2.10337	0.00295455		2.09927	0.00183242
2.10716	0.000752614		2.11511	0.000645922		2.10619	0.00138816		2.10972	0.00178278		2.10753	0.00232012		2.1063	0.00138097		2.10721	0.00221626		2.11068	0.00181956		2.10431	0.000598646		2.11062	0.00139364		2.11305	0.00144968		2.10925	0.00168642		2.10746	0.00158996		2.11155	0.000728904		2.10806	0.00320222		2.10489	0.00191115
2.11247	0.00051364		2.11948	0.000123302		2.11338	0.00145514		2.11628	0.00180809		2.11503	0.00138672		2.11005	0.0017648		2.11346	0.00197486		2.11506	0.00162994		2.11087	0.00110866		2.11499	0.0013988		2.11805	0.00156002		2.11457	0.00209092		2.11215	0.0023317		2.11561	0.00135635		2.11275	0.00183777		2.10896	0.00122071
2.12029	0.000470707		2.1248	0.000417398		2.12119	0.00144458		2.12097	0.00141496		2.11971	0.00156433		2.1163	0.00146322		2.11752	0.00252898		2.12099	0.00209365		2.11868	0.00139079		2.11968	0.00131261		2.12274	0.000954858		2.12238	0.00146906		2.11996	0.00181737		2.12186	0.00213869		2.12025	0.00332961		2.11552	0.00172745
2.12747	0.000575366		2.13261	0.000114371		2.1265	0.000937912		2.12597	0.00188767		2.12409	0.00132428		2.12443	0.00169427		2.12345	0.00312614		2.12912	0.00149222		2.12462	0.00200759		2.12687	0.00180035		2.12961	0.000663979		2.12957	0.000713598		2.12746	0.00194348		2.12968	0.00188302		2.12775	0.00370943		2.12365	0.0018607
2.13154	0.000746234		2.1398	0		2.13088	0.00106842		2.13347	0.00293777		2.13128	0.00204649		2.13099	0.00152026		2.13158	0.00190776		2.13568	0.000845413		2.12868	0.00158151		2.13468	0.00223983		2.13742	0.00173047		2.13425	0.00087398		2.13183	0.00179776		2.13592	0.00228592		2.13244	0.00387462		2.12958	0.00158629
2.13591	0.000602436		2.14355	0.0008385		2.13744	0.00090068		2.14097	0.00152578		2.13909	0.00187897		2.13474	0.00140573		2.13814	0.00193709		2.13974	0.00181484		2.13493	0.00117935		2.13999	0.0016742		2.14305	0.00128846		2.13894	0.00151871		2.13558	0.00157293		2.13999	0.00233371		2.13681	0.00404477		2.13365	0.00159466
2.1431	0.000241733		2.14823	0.000959406		2.14557	0.00111352		2.14566	0.00114473		2.1444	0.00198447		2.14067	0.00102324		2.14221	0.00226859		2.14537	0.00187235		2.14337	0.000906618		2.14437	0.00131261		2.14742	0.00143894		2.14644	0.00111535		2.14246	0.000888317		2.14593	0.00190354		2.14431	0.00371548		2.1399	0.00191454
2.15029	9.94862e-05		2.15542	0.00120013		2.15119	0.00130832		2.15035	0.00107997		2.14846	0.00151158		2.14911	0.00129519		2.14783	0.00173494		2.15318	0.000800031		2.14931	0.00117828		2.15093	0.00115751		2.15367	0.0011223		2.15426	0.00164043		2.14996	0.000530274		2.15405	0.00193172		2.15213	0.00447576		2.14833	0.00182677
2.15529	0.000871757		2.16261	0.0011827		2.15525	0.0016436		2.15722	0.00112877		2.15565	0.00184703		2.15536	0.00142409		2.15627	0.00196262		2.16006	0.000102672		2.15275	0.00115522		2.15906	0.00158734		2.16149	0.0010096		2.15894	0.00130617		2.15527	0.000336056		2.16061	0.00119695		2.1565	0.00397351		2.15396	0.00137228
2.15997	0.000504846		2.1673	0.000897319		2.16182	0.00137933		2.16503	0.000163501		2.16378	0.000542942		2.15911	0.00119304		2.16283	0.00232134		2.16443	0.000825418		2.15837	0.000642855		2.16468	0.0019734		2.16774	0.00168345		2.16331	0.00120916		2.15965	0.00125886		2.16405	0.000464894		2.16025	0.00381308		2.1574	0.00120126
2.16685	0.00018311		2.17198	0.000177547		2.17025	0.0015154		2.17035	0.000593574		2.16846	0.00116892		2.16411	0.00141723		2.16658	0.00271171		2.16975	0.000775093		2.16587	0.00105548		2.16874	0.00110185		2.1718	0.00139408		2.17081	0.00194838		2.16621	0.00198939		2.16936	0.00104725		2.16712	0.00380789		2.16302	0.00104878
2.17466	0.000152075		2.17917	0.000591459		2.17588	0.00194741		2.17441	0.00153148		2.17221	0.00129111		2.17162	0.00155276		2.17158	0.00264039		2.17756	0.000969203		2.17243	0.00162358		2.17531	0.00133775		2.17805	0.000886378		2.17894	0.00186419		2.17402	0.00170852		2.17718	0.00177616		2.17462	0.00398107		2.17083	0.00157701
2.18029	0.00105366		2.18667	0.00039496		2.17932	0.00198944		2.1816	0.00126058		2.17878	0.00171269		2.17818	0.00117248		2.17908	0.00208543		2.18475	0.00131923		2.17681	0.00131668		2.18343	0.00159452		2.18617	0.00174056		2.18363	0.0015798		2.17996	0.00180466		2.18374	0.0016402		2.17994	0.00382538		2.17708	0.00107004
2.18435	0.00160178		2.1923	0.00044158		2.18494	0.000794356		2.18941	0.000922628		2.18628	0.00192368		2.18286	0.00103672		2.18595	0.00208437		2.18881	0.00136349		2.18212	0.00211074		2.18906	0.00220032		2.19211	0.00129361		2.18737	0.00053171		2.18433	0.00154383		2.18812	0.00138544		2.18431	0.0031979		2.18146	0.00213127
2.1906	0.000596056		2.19636	0.00162602		2.19275	0.000841952		2.19441	0.00137733		2.1919	0.00125484		2.18786	0.00104888		2.19064	0.00267099		2.19318	0.000888549		2.18962	0.00197384		2.1928	0.00185624		2.19586	0.00126592		2.19394	0.00108081		2.19027	0.00112478		2.19311	0.00124588		2.19056	0.00291093		2.18677	0.00126392
2.19872	0.000375876		2.20292	0.00114305		2.19869	0.00087266		2.19815	0.000871776		2.19628	0.000723648		2.19536	0.000870238		2.19564	0.00206243		2.20037	0.00103099		2.19681	0.00127097		2.19843	0.00123831		2.20117	0.00161712		2.20175	0.00106388		2.19808	0.00204112		2.20061	0.000183974		2.19869	0.00281484		2.19458	0.000280519
2.20466	0.0004695		2.21073	0.000881634		2.20275	0.0010356		2.20441	0.00104736		2.20222	0.00108218		2.20287	0.00120454		2.20283	0.00200124		2.20756	0.0017079		2.2015	0.0014271		2.20624	0.000616351		2.20867	0.00180367		2.20707	0.000561681		2.20464	0.00219331		2.20811	0.00102087		2.20494	0.00331536		2.20177	0.000753782
2.20872	0		2.21667	0.00172776		2.20869	0.000952498		2.21222	0.00097006		2.21034	0.0019414		2.20755	0.000819828		2.21064	0.00234117		2.21256	0.00161197		2.2065	0.000728284		2.21218	0.00127916		2.21523	0.00208381		2.21113	0.00149629		2.20871	0.00130909		2.21311	0.00143504		2.209	0.00353755		2.20645	0.0015044
2.21497	0.00027501		2.22073	0.00130186		2.2165	0.00172632		2.21784	0.00138143		2.2169	0.001008		2.21224	0.00207699		2.21564	0.00280561		2.21693	0.00153648		2.21368	0.000600995		2.21655	0.00127827		2.21961	0.00216711		2.21769	0.00203509		2.21433	0.00165786		2.21749	0.00110497		2.21463	0.00348746		2.21115	0.00131278
2.22341	0.000507605		2.22698	0.000802555		2.22338	0.00105364		2.22222	0.0016911		2.22096	0.00071623		2.21942	0.00201729		2.22002	0.00173093		2.22381	0.000800255		2.2215	0.00156229		2.22218	0.00169732		2.22492	0.00154907		2.22581	0.00190468		2.22277	0.000944146		2.22468	0.00174865		2.22275	0.00389427		2.21865	0.00149852
2.22935	6.37943e-06		2.23542	0.000877712		2.22775	0.00103406		2.22816	0.00083187		2.22628	0.000870767		2.22724	0.00177032		2.22689	0.00194701		2.23193	0.00147829		2.22649	0.00230146		2.22999	0.00217429		2.23242	0.00197455		2.23207	0.000922942		2.22933	0.00106378		2.23249	0.00120417		2.22931	0.00397761		2.22615	0.00216135
2.23279	0.000420188		2.24105	0.00172318		2.23275	0.00132578		2.23597	0		2.2344	0.00198838		2.23224	0.00127706		2.23502	0.00208079		2.23724	0.00199502		2.23087	0.00106402		2.23718	0.00238842		2.23992	0.00133397		2.23644	0.000845839		2.23277	0.00198659		2.23749	0.00141272		2.23337	0.00410091		2.23114	0.00197856
2.23841	0.000583642		2.2448	0.000530462		2.24057	0.00149352		2.24253	0.000794701		2.24128	0.00231271		2.23661	0.00150987		2.24033	0.00312318		2.24162	0.00107165		2.23806	0.000700733		2.24155	0.00133348		2.24461	0.00135372		2.24206	0.0012961		2.23777	0.00109633		2.24155	0.00100667		2.239	0.00443517		2.23552	0.00154919
2.24622	0.000630541					2.24807	0.000725457		2.24659	0.00123184		2.24565	0.00192327		2.24349	0.00163966		2.24439	0.00240427		2.24818	0.00141089		2.24587	0.000296867		2.24655	0.00134852		2.2493	0.000656036		2.24987	0.00141919		2.24558	0.00115151		2.24874	0.000835546		2.24712	0.00368568		2.24302	0.00139083
