# Supplementary material for: Binding and sequestration of poison frog alkaloids by a plasma globulin
Source: eLife journal article supplement (doi:10.7554/elife.85096), 2023-12-14
Supplement: fig5-data1 [file BSA+PTX_R3 analysis_DoseResponseRawDataGrouped.xlsx]

## Sheet: RawData
NanoTemper Technologies	NanoTemper Technologies
MO.Affinity Analysis v3.0.5	MO.Affinity Analysis v3.0.5
Origin of exported data	Origin of exported data
Project Title:	20230407_BSA+PTX
Comment:
Project File Path:	C:\Users\nanotemper\Desktop\Aurora_MST\20230407_BSA\BSA+PTX analysis.nta3
Analysis-Set Name:	Analysis-Set #1
Exported from:	Dose-Response (Grouped)
Exported on:	2023-04-07 09:24:59
Analysis Settings	Analysis Settings
Type of Analysis:	MST
Evaluation strategy:	On Time
Cold Region Start:	-1
Cold Region End:	0
Hot Region Start:	4
Hot Region End:	5
Sample Information	Sample Information
Merge-Set Name:	BSA+PTX_R3 (#18)
Date of Measurement:	2023-04-07 09:08:43 → 2023-04-07 09:15:22.949
Capillary Type:	Monolith Premium Capillary
Target:	BSA
TargetConcentration:	5e-09
Ligand:	PTX
Measurement Settings	Measurement Settings
MST-Power:	Medium
Excitation-Power:	30
Excitation type:	Pico - RED
Thermostat Setpoint:	25
Fit Results (Kd)	Fit Results (Kd)
Fit Model:	Kd
Bound	821.461
Unbound	895.639
Kd	0.0159688
TargetConc	5e-09
Standard Deviation:	0.625053
Lower Kd Confidence:	0.00562877
Upper Kd Confidence:	0.0453032
Dose Response Curve	Dose Response Curve	Dose Response Curve
Ligand Concentration [M]	Fnorm [‰]	Error Value
0.005	877.916	0
0.0025	885.604	0
0.00125	890.869	0
0.000625	891.892	0
0.0003125	894.171	0
0.00015625	895.209	0
7.8125e-05	894.707	0
3.90625e-05	895.543	0
1.95313e-05	895.03	0
9.76563e-06	895.185	0
4.88281e-06	896.226	0
2.44141e-06	896.267	0
1.2207e-06	896.149	0
6.10352e-07	895.255	0
3.05176e-07	894.782	0
1.52588e-07	896.644	0

## Sheet: Fit-Values
Dose	FNorm
0.00466516
0.00435275
0.00406126
0.00378929
0.00353553
0.00329877
0.00307786
0.00287175
0.00267943
0.0025
0.00233258
0.00217638
0.00203063
0.00189465
0.00176777
0.00164938
0.00153893
0.00143587
0.00133972
0.00125
0.00116629
0.00108819
0.00101532
0.000947323
0.000883883
0.000824692
0.000769465
0.000717936
0.000669858
0.000625
0.000583146
0.000544094
0.000507658
0.000473661
0.000441942
0.000412346
0.000384733
0.000358968
0.000334929
0.0003125
0.000291573
0.000272047
0.000253829
0.000236831
0.000220971
0.000206173
0.000192366
0.000179484
0.000167465
0.00015625
0.000145786
0.000136024
0.000126914
0.000118415
0.000110485
0.000103087
9.61832e-05
8.97421e-05
8.37323e-05
7.8125e-05
7.28932e-05
6.80118e-05
6.34572e-05
5.92077e-05
5.52427e-05
5.15433e-05
4.80916e-05
4.4871e-05
4.18662e-05
3.90625e-05
3.64466e-05
3.40059e-05
3.17286e-05
2.96038e-05
2.76214e-05
2.57716e-05
2.40458e-05
2.24355e-05
2.09331e-05
1.95313e-05
1.82233e-05
1.70029e-05
1.58643e-05
1.48019e-05
1.38107e-05
1.28858e-05
1.20229e-05
1.12178e-05
1.04665e-05
9.76563e-06
9.11165e-06
8.50147e-06
7.93215e-06
7.40096e-06
6.90534e-06
6.44291e-06
6.01145e-06
5.60888e-06
5.23327e-06
4.88281e-06
4.55583e-06
4.25074e-06
3.96608e-06
3.70048e-06
3.45267e-06
3.22145e-06
3.00572e-06
2.80444e-06
2.61663e-06
2.44141e-06
2.27791e-06
2.12537e-06
1.98304e-06
1.85024e-06
1.72633e-06
1.61073e-06
1.50286e-06
1.40222e-06
1.30832e-06
1.2207e-06
1.13896e-06
1.06268e-06
9.91519e-07
9.2512e-07
8.63167e-07
8.05364e-07
7.51431e-07
7.0111e-07
6.54159e-07
6.10352e-07
5.69478e-07
5.31342e-07
4.9576e-07
4.6256e-07
4.31584e-07
4.02682e-07
3.75715e-07
3.50555e-07
3.27079e-07
3.05176e-07
2.84739e-07
2.65671e-07
2.4788e-07
2.3128e-07
2.15792e-07
2.01341e-07
1.87858e-07
1.75277e-07
1.6354e-07
1.52588e-07
