# Supplementary material for: Binding and sequestration of poison frog alkaloids by a plasma globulin
Source: eLife journal article supplement (doi:10.7554/elife.85096), 2023-12-14
Supplement: fig5-data1 [file BSA+PTX_R3 analysis_MSTTraceRawData.xlsx]

## Sheet: RawData
NanoTemper Technologies	NanoTemper Technologies
MO.Affinity Analysis v3.0.5	MO.Affinity Analysis v3.0.5
Origin of exported data	Origin of exported data
Project Title:	20230407_BSA+PTX
Comment:
Project File Path:	C:\Users\nanotemper\Desktop\Aurora_MST\20230407_BSA\BSA+PTX analysis.nta3
Analysis-Set Name:	Analysis-Set #1
Exported from:	MST Traces
Exported on:	2023-04-07 09:24:40
Analysis Settings	Analysis Settings
Type of Analysis:	MST
Evaluation strategy:	On Time
Cold Region Start:	-1
Cold Region End:	0
Hot Region Start:	4
Hot Region End:	5
Sample Information	Sample Information		Sample Information	Sample Information		Sample Information	Sample Information		Sample Information	Sample Information		Sample Information	Sample Information		Sample Information	Sample Information		Sample Information	Sample Information		Sample Information	Sample Information		Sample Information	Sample Information		Sample Information	Sample Information		Sample Information	Sample Information		Sample Information	Sample Information		Sample Information	Sample Information		Sample Information	Sample Information		Sample Information	Sample Information		Sample Information	Sample Information
Merge-Set Name:	BSA+PTX_R3 (#18)		Merge-Set Name:	BSA+PTX_R3 (#18)		Merge-Set Name:	BSA+PTX_R3 (#18)		Merge-Set Name:	BSA+PTX_R3 (#18)		Merge-Set Name:	BSA+PTX_R3 (#18)		Merge-Set Name:	BSA+PTX_R3 (#18)		Merge-Set Name:	BSA+PTX_R3 (#18)		Merge-Set Name:	BSA+PTX_R3 (#18)		Merge-Set Name:	BSA+PTX_R3 (#18)		Merge-Set Name:	BSA+PTX_R3 (#18)		Merge-Set Name:	BSA+PTX_R3 (#18)		Merge-Set Name:	BSA+PTX_R3 (#18)		Merge-Set Name:	BSA+PTX_R3 (#18)		Merge-Set Name:	BSA+PTX_R3 (#18)		Merge-Set Name:	BSA+PTX_R3 (#18)		Merge-Set Name:	BSA+PTX_R3 (#18)
Run Name:	BSA+PTX_R3 (#18)		Run Name:	BSA+PTX_R3 (#18)		Run Name:	BSA+PTX_R3 (#18)		Run Name:	BSA+PTX_R3 (#18)		Run Name:	BSA+PTX_R3 (#18)		Run Name:	BSA+PTX_R3 (#18)		Run Name:	BSA+PTX_R3 (#18)		Run Name:	BSA+PTX_R3 (#18)		Run Name:	BSA+PTX_R3 (#18)		Run Name:	BSA+PTX_R3 (#18)		Run Name:	BSA+PTX_R3 (#18)		Run Name:	BSA+PTX_R3 (#18)		Run Name:	BSA+PTX_R3 (#18)		Run Name:	BSA+PTX_R3 (#18)		Run Name:	BSA+PTX_R3 (#18)		Run Name:	BSA+PTX_R3 (#18)
Date of Measurement:	2023-04-07 09:08:43		Date of Measurement:	2023-04-07 09:09:09		Date of Measurement:	2023-04-07 09:09:36		Date of Measurement:	2023-04-07 09:10:02		Date of Measurement:	2023-04-07 09:10:29		Date of Measurement:	2023-04-07 09:10:56		Date of Measurement:	2023-04-07 09:11:23		Date of Measurement:	2023-04-07 09:11:49		Date of Measurement:	2023-04-07 09:12:16		Date of Measurement:	2023-04-07 09:12:42		Date of Measurement:	2023-04-07 09:13:09		Date of Measurement:	2023-04-07 09:13:36		Date of Measurement:	2023-04-07 09:14:03		Date of Measurement:	2023-04-07 09:14:29		Date of Measurement:	2023-04-07 09:14:56		Date of Measurement:	2023-04-07 09:15:22
Capillary Type:	Monolith Premium Capillary		Capillary Type:	Monolith Premium Capillary		Capillary Type:	Monolith Premium Capillary		Capillary Type:	Monolith Premium Capillary		Capillary Type:	Monolith Premium Capillary		Capillary Type:	Monolith Premium Capillary		Capillary Type:	Monolith Premium Capillary		Capillary Type:	Monolith Premium Capillary		Capillary Type:	Monolith Premium Capillary		Capillary Type:	Monolith Premium Capillary		Capillary Type:	Monolith Premium Capillary		Capillary Type:	Monolith Premium Capillary		Capillary Type:	Monolith Premium Capillary		Capillary Type:	Monolith Premium Capillary		Capillary Type:	Monolith Premium Capillary		Capillary Type:	Monolith Premium Capillary
Capillary Position:	1		Capillary Position:	9		Capillary Position:	2		Capillary Position:	10		Capillary Position:	3		Capillary Position:	11		Capillary Position:	4		Capillary Position:	12		Capillary Position:	5		Capillary Position:	13		Capillary Position:	6		Capillary Position:	14		Capillary Position:	7		Capillary Position:	15		Capillary Position:	8		Capillary Position:	16
Ligand:	PTX		Ligand:	PTX		Ligand:	PTX		Ligand:	PTX		Ligand:	PTX		Ligand:	PTX		Ligand:	PTX		Ligand:	PTX		Ligand:	PTX		Ligand:	PTX		Ligand:	PTX		Ligand:	PTX		Ligand:	PTX		Ligand:	PTX		Ligand:	PTX		Ligand:	PTX
Ligand Concentration:	0.005		Ligand Concentration:	1.95313e-05		Ligand Concentration:	0.0025		Ligand Concentration:	9.76563e-06		Ligand Concentration:	0.00125		Ligand Concentration:	4.88281e-06		Ligand Concentration:	0.000625		Ligand Concentration:	2.44141e-06		Ligand Concentration:	0.0003125		Ligand Concentration:	1.2207e-06		Ligand Concentration:	0.00015625		Ligand Concentration:	6.10352e-07		Ligand Concentration:	7.8125e-05		Ligand Concentration:	3.05176e-07		Ligand Concentration:	3.90625e-05		Ligand Concentration:	1.52588e-07
Target:	BSA		Target:	BSA		Target:	BSA		Target:	BSA		Target:	BSA		Target:	BSA		Target:	BSA		Target:	BSA		Target:	BSA		Target:	BSA		Target:	BSA		Target:	BSA		Target:	BSA		Target:	BSA		Target:	BSA		Target:	BSA
TargetConcentration:	5e-09		TargetConcentration:	5e-09		TargetConcentration:	5e-09		TargetConcentration:	5e-09		TargetConcentration:	5e-09		TargetConcentration:	5e-09		TargetConcentration:	5e-09		TargetConcentration:	5e-09		TargetConcentration:	5e-09		TargetConcentration:	5e-09		TargetConcentration:	5e-09		TargetConcentration:	5e-09		TargetConcentration:	5e-09		TargetConcentration:	5e-09		TargetConcentration:	5e-09		TargetConcentration:	5e-09
Measurement Settings	Measurement Settings		Measurement Settings	Measurement Settings		Measurement Settings	Measurement Settings		Measurement Settings	Measurement Settings		Measurement Settings	Measurement Settings		Measurement Settings	Measurement Settings		Measurement Settings	Measurement Settings		Measurement Settings	Measurement Settings		Measurement Settings	Measurement Settings		Measurement Settings	Measurement Settings		Measurement Settings	Measurement Settings		Measurement Settings	Measurement Settings		Measurement Settings	Measurement Settings		Measurement Settings	Measurement Settings		Measurement Settings	Measurement Settings		Measurement Settings	Measurement Settings
MST-Power:	Medium		MST-Power:	Medium		MST-Power:	Medium		MST-Power:	Medium		MST-Power:	Medium		MST-Power:	Medium		MST-Power:	Medium		MST-Power:	Medium		MST-Power:	Medium		MST-Power:	Medium		MST-Power:	Medium		MST-Power:	Medium		MST-Power:	Medium		MST-Power:	Medium		MST-Power:	Medium		MST-Power:	Medium
Excitation-Power:	30		Excitation-Power:	30		Excitation-Power:	30		Excitation-Power:	30		Excitation-Power:	30		Excitation-Power:	30		Excitation-Power:	30		Excitation-Power:	30		Excitation-Power:	30		Excitation-Power:	30		Excitation-Power:	30		Excitation-Power:	30		Excitation-Power:	30		Excitation-Power:	30		Excitation-Power:	30		Excitation-Power:	30
Excitation type:	Pico - RED		Excitation type:	Pico - RED		Excitation type:	Pico - RED		Excitation type:	Pico - RED		Excitation type:	Pico - RED		Excitation type:	Pico - RED		Excitation type:	Pico - RED		Excitation type:	Pico - RED		Excitation type:	Pico - RED		Excitation type:	Pico - RED		Excitation type:	Pico - RED		Excitation type:	Pico - RED		Excitation type:	Pico - RED		Excitation type:	Pico - RED		Excitation type:	Pico - RED		Excitation type:	Pico - RED
Thermostat Setpoint:	25		Thermostat Setpoint:	25		Thermostat Setpoint:	25		Thermostat Setpoint:	25		Thermostat Setpoint:	25		Thermostat Setpoint:	25		Thermostat Setpoint:	25		Thermostat Setpoint:	25		Thermostat Setpoint:	25		Thermostat Setpoint:	25		Thermostat Setpoint:	25		Thermostat Setpoint:	25		Thermostat Setpoint:	25		Thermostat Setpoint:	25		Thermostat Setpoint:	25		Thermostat Setpoint:	25
Included	Included		Included	Included		Included	Included		Included	Included		Included	Included		Included	Included		Included	Included		Included	Included		Included	Included		Included	Included		Included	Included		Included	Included		Included	Included		Included	Included		Included	Included		Included	Included
Time [s]	Normalized Fluorescence [-]		Time [s]	Normalized Fluorescence [-]		Time [s]	Normalized Fluorescence [-]		Time [s]	Normalized Fluorescence [-]		Time [s]	Normalized Fluorescence [-]		Time [s]	Normalized Fluorescence [-]		Time [s]	Normalized Fluorescence [-]		Time [s]	Normalized Fluorescence [-]		Time [s]	Normalized Fluorescence [-]		Time [s]	Normalized Fluorescence [-]		Time [s]	Normalized Fluorescence [-]		Time [s]	Normalized Fluorescence [-]		Time [s]	Normalized Fluorescence [-]		Time [s]	Normalized Fluorescence [-]		Time [s]	Normalized Fluorescence [-]		Time [s]	Normalized Fluorescence [-]
-2.9501	0.999859		-2.9502	1.00045		-2.9502	0.998802		-2.9502	0.998452		-2.9502	1.00138		-2.9502	1.00273		-2.9502	1.00117		-2.9502	1.00175		-2.9502	0.999482		-2.9501	0.997133		-2.9501	0.997271		-2.9502	0.998085		-2.9502	1.0004		-2.9502	1.0004		-2.9502	0.999624		-2.9501	0.997943
-2.9001	1.00069		-2.9002	0.999131		-2.9002	0.99905		-2.9002	0.999797		-2.9002	0.99824		-2.9001	0.99885		-2.9002	1.00014		-2.9002	0.995868		-2.9002	0.999793		-2.9001	1.0011		-2.9001	0.998807		-2.9002	1.00136		-2.9002	1.00057		-2.9002	1		-2.9002	0.999974		-2.9001	0.997482
-2.8501	0.999935		-2.8502	1.00061		-2.8502	1.00203		-2.8502	0.998719		-2.8502	1.00025		-2.8501	1.00167		-2.8501	0.998709		-2.8502	0.998869		-2.8502	1.00118		-2.8501	1.00152		-2.8501	0.998834		-2.8502	1.00069		-2.8502	1.00039		-2.8502	1.00017		-2.8502	0.999912		-2.8501	0.999827
-2.8001	0.999205		-2.8002	1.00076		-2.8002	0.999245		-2.8002	1.00109		-2.8002	0.998652		-2.8001	0.998488		-2.8001	0.996479		-2.8002	0.997753		-2.8002	0.997654		-2.8001	0.998534		-2.8001	0.999777		-2.8002	0.999217		-2.8002	0.998729		-2.8002	1.00099		-2.8002	1.00009		-2.8001	0.998957
-2.7501	0.999149		-2.7502	1.00075		-2.7502	1.00008		-2.7502	1.00065		-2.7502	1.00031		-2.7501	0.999823		-2.7501	1.00069		-2.7502	1.00164		-2.7502	0.999809		-2.7501	1.0003		-2.7501	0.999718		-2.7502	0.996432		-2.7502	1.00122		-2.7502	0.999232		-2.7502	0.999933		-2.7501	0.999749
-2.7001	1.00174		-2.7002	0.999584		-2.7002	0.998356		-2.7002	0.999837		-2.7002	1.00335		-2.7001	1.00058		-2.7001	1.00278		-2.7002	0.998692		-2.7002	1.00232		-2.7001	1.00329		-2.7001	0.99879		-2.7002	0.997807		-2.7002	0.999215		-2.7002	0.999722		-2.7002	1.00138		-2.7001	0.998088
-2.6501	0.997553		-2.6502	1.00081		-2.6502	1.00049		-2.6502	0.999635		-2.6502	1.0008		-2.6501	0.998205		-2.6501	0.999141		-2.6502	1.00342		-2.6502	0.994294		-2.6501	1.00158		-2.6501	1.00195		-2.6502	1.00064		-2.6502	0.999407		-2.6502	0.998045		-2.6502	1.00091		-2.6501	0.99996
-2.6001	0.999189		-2.6002	0.99859		-2.6002	0.999434		-2.6002	0.999856		-2.6002	0.999816		-2.6001	1.00121		-2.6001	1.00181		-2.6002	0.999825		-2.6002	0.999885		-2.6001	0.998093		-2.6001	1.00054		-2.6002	0.99801		-2.6002	0.999691		-2.6002	1.0012		-2.6002	0.998923		-2.6001	1.00125
-2.5501	0.996639		-2.5502	1.00172		-2.5502	0.99978		-2.5502	0.995733		-2.5502	0.99849		-2.5501	0.998272		-2.5501	0.997985		-2.5502	0.999637		-2.5502	0.998142		-2.5501	1.00107		-2.5501	0.999678		-2.5501	1.00246		-2.5501	1.00157		-2.5502	0.996549		-2.5502	0.997927		-2.5501	1.00277
-2.5001	1.00057		-2.5001	1.00019		-2.5002	1.00156		-2.5002	0.999647		-2.5002	0.999156		-2.5001	0.998309		-2.5001	0.998212		-2.5002	0.998557		-2.5002	0.999893		-2.5001	0.999951		-2.5001	1.00118		-2.5001	1.00174		-2.5001	0.996443		-2.5002	0.998942		-2.5002	0.998519		-2.5001	0.997929
-2.4501	1.00028		-2.4501	0.998431		-2.4501	1.00023		-2.4502	0.997779		-2.4502	0.999732		-2.4501	1.00072		-2.4501	0.994934		-2.4502	0.998463		-2.4502	0.998518		-2.4501	0.997706		-2.4501	0.999824		-2.4501	1.00027		-2.4501	0.999143		-2.4502	1.0012		-2.4502	0.998783		-2.4501	1.00054
-2.4001	0.999589		-2.4001	0.997745		-2.4001	0.998477		-2.4002	1.00001		-2.4002	0.997135		-2.4001	1.00018		-2.4001	1.00323		-2.4002	0.998546		-2.4002	1.00273		-2.4001	0.995723		-2.4001	1.00172		-2.4001	0.999841		-2.4001	1.00139		-2.4002	1.00067		-2.4002	1.00078		-2.4001	1.00057
-2.3501	1.00075		-2.3501	1.00073		-2.3501	0.999725		-2.3502	0.999749		-2.3502	0.999334		-2.3501	0.999462		-2.3501	0.999488		-2.3502	0.999708		-2.3502	1.00049		-2.3501	1.00074		-2.3501	0.999652		-2.3501	1.00117		-2.3501	1.00064		-2.3502	1.00018		-2.3502	0.996225		-2.3501	0.999562
-2.3001	0.996551		-2.3001	1.00197		-2.3001	0.996958		-2.3002	1.00046		-2.3002	0.997199		-2.3001	0.995781		-2.3001	1.00217		-2.3002	0.999791		-2.3002	1.00108		-2.3001	1.0026		-2.3001	0.999456		-2.3001	1.001		-2.3001	0.99766		-2.3002	0.996035		-2.3002	0.999289		-2.3001	0.999142
-2.2501	0.998982		-2.2501	0.999743		-2.2501	0.998119		-2.2502	0.998846		-2.2502	0.999358		-2.2501	0.994511		-2.2501	1.00075		-2.2502	1.00156		-2.2502	1.00252		-2.2501	1.00133		-2.2501	0.998853		-2.2501	0.998076		-2.2501	0.999208		-2.2502	0.999946		-2.2502	0.998146		-2.2501	0.998427
-2.2001	0.995673		-2.2001	1.00125		-2.2001	0.995865		-2.2002	1.00044		-2.2002	1.00185		-2.2001	1.00067		-2.2001	1.00088		-2.2001	0.999372		-2.2002	0.997366		-2.2001	0.998801		-2.2001	0.999852		-2.2001	0.999696		-2.2001	0.999423		-2.2002	1.00049		-2.2002	0.999668		-2.2001	0.996782
-2.1501	0.998416		-2.1501	0.998262		-2.1501	0.998658		-2.1502	0.994837		-2.1502	0.995952		-2.1501	1.00215		-2.1501	0.999058		-2.1501	0.99776		-2.1501	1.00078		-2.1501	1.00138		-2.1501	0.999196		-2.1501	1.00053		-2.1501	0.999183		-2.1502	1.00171		-2.1502	0.999773		-2.1501	1.00155
-2.1001	0.997272		-2.1001	0.999677		-2.1001	1.00045		-2.1002	0.996876		-2.1002	0.999062		-2.1001	0.997801		-2.1001	0.99929		-2.1001	0.996054		-2.1001	0.99712		-2.1001	0.997858		-2.1001	0.999933		-2.1001	0.99897		-2.1001	0.999678		-2.1002	0.999822		-2.1002	0.998601		-2.1001	1.00011
-2.0501	0.998744		-2.0501	0.999505		-2.0501	0.997429		-2.0502	1.00022		-2.0502	0.998573		-2.0501	0.999335		-2.0501	0.996889		-2.0501	0.999733		-2.0501	0.998762		-2.0501	1.00027		-2.0501	0.999241		-2.0501	0.999828		-2.0501	1.00052		-2.0502	0.999426		-2.0502	1.00116		-2.0501	0.995078
-2.0001	0.996511		-2.0001	1.00179		-2.0001	0.999743		-2.0002	1.00162		-2.0002	1.00096		-2.0001	0.996623		-2.0001	1.00045		-2.0001	0.999225		-2.0001	1.00035		-2.0001	0.997452		-2.0001	0.99812		-2.0001	0.99964		-2.0001	0.998287		-2.0002	1.00159		-2.0002	0.998183		-2.0001	0.998772
-1.9501	0.998947		-1.9501	0.997869		-1.9501	0.999708		-1.9502	1.00183		-1.9502	0.998709		-1.9501	0.99927		-1.9501	1.00082		-1.9501	0.999225		-1.9501	1.00002		-1.9501	0.996659		-1.9501	0.996966		-1.9501	0.996881		-1.9501	0.99897		-1.9502	1.00084		-1.9502	0.99983		-1.9501	1.00076
-1.9001	0.99739		-1.9001	0.998531		-1.9001	0.995976		-1.9002	0.999916		-1.9002	0.998075		-1.9001	1.00014		-1.9001	0.997007		-1.9001	0.996301		-1.9001	0.998065		-1.9001	0.99797		-1.9001	0.999052		-1.9001	0.998805		-1.9001	0.996137		-1.9001	0.998244		-1.9002	0.998874		-1.9001	0.998539
-1.8501	0.998291		-1.8501	1.00105		-1.8501	0.994908		-1.8502	0.996563		-1.8502	0.999823		-1.8501	0.997722		-1.8501	0.998262		-1.8501	0.999532		-1.8501	0.99871		-1.8501	0.995771		-1.8501	0.999822		-1.8501	0.998891		-1.8501	0.998124		-1.8501	1.00169		-1.8501	1.0009		-1.8501	0.997981
-1.8001	0.996812		-1.8001	0.999888		-1.8001	0.998199		-1.8001	1.00132		-1.8002	0.999272		-1.8001	0.998326		-1.8001	0.997081		-1.8001	0.998247		-1.8001	0.999105		-1.8001	0.997639		-1.8001	0.998739		-1.8001	0.997983		-1.8001	1.00015		-1.8001	1.0008		-1.8001	1.00083		-1.8001	0.998667
-1.7501	0.998239		-1.7501	0.996635		-1.7501	0.999153		-1.7501	0.999505		-1.7502	0.999726		-1.7501	0.996185		-1.7501	1.00034		-1.7501	1.00082		-1.7501	0.999883		-1.7501	0.996395		-1.7501	0.998562		-1.7501	1.00119		-1.7501	0.99851		-1.7501	0.99642		-1.7501	0.999618		-1.7501	0.999122
-1.7001	0.995191		-1.7001	0.99707		-1.7001	0.997826		-1.7001	1.00088		-1.7001	1.00061		-1.7001	0.998043		-1.7001	0.996415		-1.7001	1.00166		-1.7001	0.997111		-1.7001	0.997689		-1.7001	0.998356		-1.7001	1.00019		-1.7001	1.00032		-1.7001	1.00109		-1.7001	0.999192		-1.7001	1.00122
-1.6501	0.996008		-1.6501	0.996436		-1.6501	0.997841		-1.6501	0.997322		-1.6501	1.00014		-1.6501	0.996521		-1.6501	0.997174		-1.6501	0.998383		-1.6501	1.00001		-1.6501	0.997508		-1.6501	0.999568		-1.6501	0.999105		-1.6501	0.99886		-1.6501	1.00297		-1.6501	0.999576		-1.6501	0.998658
-1.6001	0.995593		-1.6001	0.998354		-1.6001	1.0002		-1.6001	0.998005		-1.6001	0.999529		-1.6001	0.99726		-1.6001	0.993684		-1.6001	0.997496		-1.6001	0.995895		-1.6001	0.995334		-1.6001	0.994903		-1.6001	0.997813		-1.6001	1.00098		-1.6001	1.00029		-1.6001	0.999656		-1.6001	1.00193
-1.5501	0.996251		-1.5501	0.999832		-1.5501	0.998379		-1.5501	0.999269		-1.5501	0.998635		-1.5501	0.999491		-1.5501	1.00207		-1.5501	0.997241		-1.5501	0.997434		-1.5501	1.00222		-1.5501	0.997972		-1.5501	0.999761		-1.5501	1.00037		-1.5501	1.00107		-1.5501	1.00015		-1.5501	0.999619
-1.5001	0.998879		-1.5001	0.996209		-1.5001	0.997359		-1.5001	0.998231		-1.5001	0.997199		-1.5001	0.996311		-1.5001	0.997232		-1.5001	0.997687		-1.5001	0.998189		-1.5001	1.00166		-1.5001	0.997495		-1.5001	0.997346		-1.5001	0.997513		-1.5001	1.00053		-1.5001	0.999208		-1.5001	1.00344
-1.4501	0.997899		-1.4501	0.998184		-1.4501	0.99579		-1.4501	0.996772		-1.4501	0.996415		-1.4501	0.996963		-1.4501	0.997161		-1.4501	0.999773		-1.4501	0.996624		-1.45	0.99742		-1.45	0.99782		-1.4501	0.999432		-1.4501	0.9983		-1.4501	0.996845		-1.4501	0.997402		-1.4501	0.998379
-1.4001	0.997387		-1.4001	1.00018		-1.4001	0.998714		-1.4001	0.998107		-1.4001	0.996855		-1.4001	0.997743		-1.4001	0.997477		-1.4001	0.995251		-1.4001	0.998865		-1.4	1.00173		-1.4	0.997581		-1.4001	0.999163		-1.4001	0.996693		-1.4001	0.999689		-1.4001	0.999564		-1.4001	1.00199
-1.3501	0.996347		-1.3501	0.997169		-1.3501	0.996472		-1.3501	0.994545		-1.3501	0.997046		-1.3501	0.997881		-1.3501	0.998555		-1.3501	1.00027		-1.3501	0.997095		-1.35	0.996441		-1.35	0.996422		-1.3501	0.996173		-1.3501	0.996365		-1.3501	0.998506		-1.3501	0.99868		-1.3501	0.996857
-1.3	0.997003		-1.3001	0.997053		-1.3001	0.998133		-1.3001	0.997513		-1.3001	0.995537		-1.3001	0.997275		-1.3001	0.997167		-1.3001	0.99947		-1.3001	1.0003		-1.3	0.996645		-1.3	1.00227		-1.3001	0.998205		-1.3001	1.00061		-1.3001	0.999181		-1.3001	0.997599		-1.3001	0.996841
-1.25	0.994779		-1.2501	0.996862		-1.2501	0.99618		-1.2501	1.00049		-1.2501	0.998087		-1.2501	0.999549		-1.2501	0.996998		-1.2501	0.993427		-1.2501	0.996774		-1.25	0.997494		-1.25	0.995738		-1.2501	0.996903		-1.2501	0.998537		-1.2501	0.999414		-1.2501	0.99716		-1.2501	0.999363
-1.2	0.996197		-1.2001	0.995609		-1.2001	0.992449		-1.2001	0.998411		-1.2001	0.995348		-1.2001	0.993132		-1.2001	0.999127		-1.2001	0.998612		-1.2001	0.998576		-1.2	0.996547		-1.2	0.999775		-1.2001	0.998905		-1.2001	0.998457		-1.2001	0.999913		-1.2001	1.00031		-1.2	0.999908
-1.15	0.994955		-1.1501	0.999023		-1.1501	0.9964		-1.1501	0.998021		-1.1501	0.998267		-1.1501	0.997404		-1.1501	0.998613		-1.1501	0.992961		-1.1501	1.00029		-1.15	0.998548		-1.15	0.995575		-1.1501	0.997257		-1.1501	1.00212		-1.1501	0.999239		-1.1501	0.996944		-1.15	0.999246
-1.1	0.9945		-1.1001	1.00022		-1.1001	0.995313		-1.1001	0.997507		-1.1001	1.00102		-1.1001	0.995342		-1.1001	0.999347		-1.1001	1.00099		-1.1001	0.999369		-1.1	0.997379		-1.1	0.997165		-1.1001	0.997745		-1.1001	0.998171		-1.1001	1.00027		-1.1001	0.996872		-1.1	0.994372
-1.05	0.994372		-1.0501	0.997572		-1.0501	0.993182		-1.0501	0.996679		-1.0501	0.996912		-1.05	0.999233		-1.0501	0.998978		-1.0501	0.996197		-1.0501	1.0001		-1.05	0.996494		-1.05	1.00042		-1.0501	0.997257		-1.0501	0.997354		-1.0501	1.00057		-1.0501	0.997003		-1.05	0.999252
-1	0.996671		-1.0001	0.998446		-1.0001	0.996043		-1.0001	0.997464		-1.0001	0.999204		-1	0.998963		-1	0.995343		-1.0001	0.997095		-1.0001	0.999163		-1	0.999967		-1	0.999083		-1.0001	1.00075		-1.0001	0.998611		-1.0001	0.997816		-1.0001	0.998479		-1	0.999898
-0.95	0.995701		-0.9501	0.997819		-0.9501	0.998032		-0.9501	0.999223		-0.9501	0.997889		-0.95	0.999156		-0.95	0.997144		-0.9501	0.997456		-0.9501	0.997663		-0.95	0.996581		-0.95	0.997475		-0.9501	0.998677		-0.9501	0.998883		-0.9501	0.997436		-0.9501	0.999374		-0.95	0.997753
-0.9	0.994804		-0.9001	0.996977		-0.9001	0.993576		-0.9001	0.998802		-0.9001	0.997077		-0.9	0.998521		-0.9	0.996979		-0.9001	0.99755		-0.9001	0.996348		-0.9	0.996877		-0.9	0.99517		-0.9001	1.00181		-0.9001	1.002		-0.9001	0.998828		-0.9001	0.999404		-0.9	0.994937
-0.85	0.998551		-0.8501	0.997705		-0.8501	0.99746		-0.8501	0.995215		-0.8501	0.997352		-0.85	0.995303		-0.85	0.996714		-0.8501	0.998655		-0.8501	1.0001		-0.85	0.997656		-0.85	0.995456		-0.8501	0.998509		-0.8501	1.00027		-0.8501	0.99706		-0.8501	0.998183		-0.85	0.995544
-0.8	0.9954		-0.8001	0.997712		-0.8001	0.995632		-0.8001	0.998186		-0.8001	0.999291		-0.8	0.996655		-0.8	0.997486		-0.8001	0.993868		-0.8001	0.998213		-0.8	0.997987		-0.8	0.995457		-0.8001	0.998957		-0.8001	0.998166		-0.8001	1.00076		-0.8001	0.999122		-0.8	0.99674
-0.75	0.994889		-0.7501	0.99707		-0.7501	0.996319		-0.7501	0.995309		-0.7501	0.996353		-0.75	0.99897		-0.75	0.998558		-0.7501	0.996042		-0.7501	0.997734		-0.75	0.998203		-0.75	0.997347		-0.75	0.997756		-0.7501	0.99761		-0.7501	1.00016		-0.7501	0.99959		-0.75	0.996501
-0.7	0.993673		-0.7	0.994366		-0.7001	0.996977		-0.7001	0.995998		-0.7001	0.994752		-0.7	0.99733		-0.7	0.999517		-0.7001	0.99799		-0.7001	0.998593		-0.7	0.996947		-0.7	1.00119		-0.7	0.997812		-0.7	0.998155		-0.7001	1.00056		-0.7001	0.996187		-0.7	0.999561
-0.65	0.995594		-0.65	1.00009		-0.65	0.995788		-0.6501	0.99657		-0.6501	0.99786		-0.65	0.997087		-0.65	0.994918		-0.6501	0.995436		-0.6501	0.995916		-0.65	0.998934		-0.65	0.995989		-0.65	0.999877		-0.65	0.998425		-0.6501	0.999339		-0.6501	0.997113		-0.65	0.997383
-0.6	0.996264		-0.6	0.997238		-0.6	0.996474		-0.6001	0.996857		-0.6001	0.997735		-0.6	0.994589		-0.6	0.99813		-0.6001	0.994713		-0.6001	0.998591		-0.6	0.998169		-0.6	1.00055		-0.6	0.998602		-0.6	1.00008		-0.6001	0.999892		-0.6001	0.999473		-0.6	0.998271
-0.55	0.995504		-0.55	0.997523		-0.55	0.996393		-0.5501	0.998043		-0.5501	0.995066		-0.55	0.993703		-0.55	0.997681		-0.5501	0.995581		-0.5501	0.99962		-0.55	0.998593		-0.55	0.996988		-0.55	0.997715		-0.55	0.996575		-0.5501	0.998346		-0.5501	0.998007		-0.55	0.998714
-0.5	0.993827		-0.5	0.997553		-0.5	0.998131		-0.5001	0.993137		-0.5001	0.995431		-0.5	0.99562		-0.5	0.998574		-0.5001	0.999813		-0.5001	0.997621		-0.5	0.996688		-0.5	0.995879		-0.5	1.00105		-0.5	0.99535		-0.5001	0.998313		-0.5001	0.999538		-0.5	0.997952
-0.45	0.996578		-0.45	0.99806		-0.45	0.994841		-0.4501	0.996209		-0.4501	0.997798		-0.45	0.996684		-0.45	0.997607		-0.4501	0.993803		-0.4501	0.999134		-0.45	0.996262		-0.45	0.995142		-0.45	0.999973		-0.45	1.00008		-0.4501	0.998451		-0.4501	0.996067		-0.45	0.999403
-0.4	0.992343		-0.4	0.998402		-0.4	0.996842		-0.4001	0.998625		-0.4001	0.99565		-0.4	0.998515		-0.4	0.998906		-0.4001	0.994833		-0.4001	0.995265		-0.4	0.999612		-0.4	0.996485		-0.4	0.99703		-0.4	0.998036		-0.4001	1.00087		-0.4001	0.998473		-0.4	0.995672
-0.35	0.992871		-0.35	0.996412		-0.35	0.995188		-0.3501	0.99519		-0.3501	0.998612		-0.35	0.995353		-0.35	1.00058		-0.35	0.996056		-0.3501	0.996975		-0.35	0.996321		-0.35	1.00042		-0.35	0.99862		-0.35	0.998691		-0.3501	1.00019		-0.3501	0.998568		-0.35	0.996653
-0.3	0.994781		-0.3	0.997311		-0.3	0.996472		-0.3001	0.994703		-0.3001	0.999106		-0.3	0.992929		-0.3	0.999007		-0.3	0.999466		-0.3	0.996071		-0.3	0.998401		-0.3	0.995401		-0.3	0.995424		-0.3	0.999285		-0.3001	0.998772		-0.3001	0.999056		-0.3	0.997006
-0.25	0.993291		-0.25	1.00133		-0.25	0.995041		-0.2501	0.996693		-0.2501	0.996206		-0.25	0.997414		-0.25	0.996385		-0.25	0.997489		-0.25	0.996608		-0.25	0.996734		-0.25	0.996169		-0.25	0.997183		-0.25	0.995918		-0.2501	0.99914		-0.2501	0.996738		-0.25	0.996048
-0.2	0.992379		-0.2	0.998735		-0.2	0.996474		-0.2001	0.997483		-0.2001	0.996201		-0.2	0.999542		-0.2	0.995725		-0.2	0.996059		-0.2	0.995034		-0.2	0.997394		-0.2	0.99577		-0.2	0.997865		-0.2	0.996593		-0.2001	1.00078		-0.2001	0.995584		-0.2	0.9969
-0.15	0.995311		-0.15	0.996316		-0.15	0.993755		-0.1501	0.999797		-0.1501	0.997873		-0.15	0.995461		-0.15	0.996411		-0.15	0.995952		-0.15	0.995134		-0.15	0.996522		-0.15	0.995465		-0.15	0.997798		-0.15	0.997144		-0.1501	0.99748		-0.1501	0.998257		-0.15	0.997545
-0.0999999	0.994567		-0.0999999	0.999698		-0.0999999	0.993259		-0.1001	0.996166		-0.1001	0.996372		-0.0999999	0.992747		-0.0999999	0.995214		-0.0999999	0.99518		-0.0999999	0.99864		-0.0999999	0.998948		-0.0999999	0.997044		-0.0999999	0.998135		-0.0999999	0.995606		-0.1001	0.997843		-0.1001	0.995913		-0.0999999	0.997288
-0.05	0.991339		-0.05	0.999475		-0.05	0.993857		-0.0501001	0.994718		-0.0501001	0.997726		-0.05	0.998245		-0.05	0.995215		-0.05	0.995523		-0.05	0.997142		-0.05	0.996924		-0.05	0.996352		-0.05	0.995276		-0.05	0.997474		-0.05	1.00068		-0.0501001	0.999445		-0.05	0.997288
0	0.993311		0	1.00028		0	0.994661		0	0.997232		0	0.999203		0	0.994049		0	0.996523		0	0.99812		0	0.998484		0	0.994194		0	0.998498		0	0.997176		0	0.999741		0	0.999545		0	0.996498		0	0.996787
0.05	0.984776		0.05	0.987181		0.05	0.98595		0.05	0.991672		0.0499001	0.990519		0.05	0.987192		0.05	0.990308		0.05	0.988098		0.05	0.991034		0.05	0.988187		0.05	0.987222		0.05	0.98995		0.05	0.989594		0.05	0.989514		0.05	0.991879		0.05	0.991369
0.0999999	0.972288		0.0999999	0.978222		0.0999999	0.976283		0.0999999	0.977727		0.0999999	0.978948		0.0999999	0.979104		0.0999999	0.977796		0.0999999	0.97723		0.0999999	0.977514		0.0999999	0.98055		0.0999999	0.979896		0.0999999	0.976698		0.0999999	0.978828		0.0999999	0.978246		0.0999999	0.978921		0.0999999	0.979102
0.15	0.965054		0.15	0.96963		0.15	0.969215		0.15	0.973632		0.15	0.96735		0.15	0.971672		0.15	0.97261		0.15	0.974487		0.15	0.971871		0.15	0.970443		0.15	0.971392		0.15	0.974765		0.15	0.971036		0.15	0.974053		0.15	0.972877		0.15	0.968208
0.2	0.962475		0.2	0.966637		0.2	0.965246		0.2	0.964097		0.2	0.965849		0.2	0.967854		0.2	0.965048		0.2	0.967917		0.2	0.966327		0.2	0.967677		0.2	0.965457		0.2	0.967883		0.2	0.965979		0.2	0.970456		0.2	0.969902		0.2	0.970072
0.25	0.954199		0.25	0.970144		0.25	0.959326		0.25	0.966864		0.25	0.964676		0.25	0.965317		0.25	0.965122		0.25	0.964914		0.25	0.962918		0.25	0.96342		0.25	0.96534		0.25	0.965178		0.25	0.96482		0.25	0.963434		0.25	0.96642		0.25	0.968093
0.3	0.950993		0.3	0.961621		0.3	0.955441		0.3	0.962261		0.3	0.957367		0.3	0.96094		0.3	0.960122		0.3	0.961213		0.3	0.961211		0.3	0.960515		0.3	0.962656		0.3	0.963992		0.3	0.962825		0.3	0.96124		0.3	0.959848		0.3	0.96195
0.35	0.952314		0.35	0.957647		0.35	0.954628		0.35	0.961262		0.35	0.959639		0.35	0.958196		0.35	0.957216		0.35	0.95922		0.35	0.960423		0.3501	0.962321		0.35	0.960583		0.35	0.960642		0.35	0.96035		0.35	0.959545		0.35	0.958404		0.35	0.961973
0.4	0.947812		0.4	0.958146		0.4	0.952695		0.4	0.955347		0.4	0.955977		0.4	0.956156		0.4	0.95386		0.4	0.957344		0.4	0.958404		0.4001	0.9565		0.4001	0.95469		0.4	0.959551		0.4	0.959031		0.4	0.959277		0.4	0.954354		0.4	0.954539
0.45	0.9456		0.45	0.956109		0.45	0.950046		0.45	0.952354		0.45	0.95266		0.45	0.955979		0.45	0.951394		0.45	0.951171		0.45	0.95798		0.4501	0.954721		0.4501	0.955381		0.45	0.956449		0.45	0.954934		0.45	0.954666		0.45	0.954499		0.45	0.956112
0.5001	0.942816		0.5	0.950731		0.5	0.945752		0.5	0.954231		0.5	0.952195		0.5	0.953003		0.5	0.95006		0.5	0.954417		0.5	0.950541		0.5001	0.95094		0.5001	0.951899		0.5	0.95277		0.5	0.955467		0.5	0.955751		0.5	0.953115		0.5	0.95424
0.5501	0.939323		0.55	0.950161		0.55	0.945549		0.55	0.95166		0.55	0.949384		0.55	0.951988		0.55	0.947534		0.55	0.952334		0.55	0.952158		0.5501	0.953935		0.5501	0.949747		0.55	0.951811		0.55	0.948445		0.55	0.953292		0.55	0.949707		0.55	0.954119
0.6001	0.93876		0.6	0.949657		0.6	0.943618		0.6	0.95175		0.6	0.944965		0.6	0.948164		0.6	0.952222		0.6	0.948222		0.6	0.948402		0.6001	0.95239		0.6001	0.948211		0.6	0.951525		0.6	0.950046		0.6	0.95108		0.6	0.952735		0.6	0.950074
0.6501	0.939181		0.65	0.946961		0.65	0.941881		0.65	0.948301		0.65	0.945295		0.65	0.950229		0.65	0.945206		0.65	0.947495		0.65	0.950764		0.6501	0.952573		0.6501	0.949549		0.65	0.949366		0.65	0.948545		0.65	0.950684		0.65	0.948515		0.6501	0.949738
0.7001	0.933362		0.7	0.948107		0.7	0.938152		0.7	0.947055		0.7	0.946693		0.7	0.945736		0.7	0.947064		0.7	0.949834		0.7	0.944548		0.7001	0.945028		0.7001	0.946059		0.7	0.9459		0.7	0.946649		0.7	0.948354		0.7	0.946809		0.7001	0.947024
0.7501	0.934437		0.75	0.945705		0.75	0.936738		0.75	0.946248		0.75	0.941617		0.7501	0.942497		0.75	0.94387		0.75	0.9456		0.75	0.942948		0.7501	0.945154		0.7501	0.94651		0.75	0.945683		0.75	0.946382		0.75	0.94528		0.75	0.9465		0.7501	0.945705
0.8001	0.932091		0.8	0.945867		0.8	0.940468		0.8	0.944572		0.8	0.939704		0.8001	0.943564		0.8001	0.93988		0.8	0.941096		0.8	0.941741		0.8001	0.943184		0.8001	0.943061		0.8	0.945735		0.8	0.943441		0.8	0.944033		0.8	0.942907		0.8001	0.944074
0.8501	0.931827		0.85	0.944204		0.85	0.93638		0.85	0.940893		0.85	0.941674		0.8501	0.944308		0.8501	0.94265		0.85	0.94322		0.85	0.942517		0.8501	0.943132		0.8501	0.942885		0.85	0.944006		0.85	0.943048		0.85	0.942719		0.85	0.942261		0.8501	0.942507
0.9001	0.929575		0.9	0.941787		0.9	0.933202		0.9	0.940779		0.9	0.936132		0.9001	0.945581		0.9001	0.94136		0.9	0.941523		0.9	0.943068		0.9001	0.94067		0.9001	0.941094		0.9	0.943353		0.9	0.941434		0.9	0.942837		0.9	0.940175		0.9001	0.942962
0.9501	0.927348		0.95	0.939715		0.95	0.932398		0.95	0.942227		0.95	0.938202		0.9501	0.939595		0.9501	0.936687		0.95	0.939434		0.95	0.940055		0.9501	0.93826		0.9501	0.93794		0.95	0.942901		0.95	0.938401		0.95	0.940161		0.95	0.942135		0.9501	0.941947
1.0001	0.924526		1	0.937689		1	0.931818		1	0.937715		1	0.938182		1.0001	0.937038		1.0001	0.93972		1	0.939228		1	0.93638		1.0001	0.941376		1.0001	0.940525		1	0.937489		1	0.939777		1	0.940182		1	0.938154		1.0001	0.938982
1.0501	0.924697		1.05	0.936617		1.05	0.932314		1.05	0.937415		1.05	0.934733		1.0501	0.938115		1.0501	0.934694		1.05	0.938582		1.05	0.936387		1.0501	0.93908		1.0501	0.936863		1.0501	0.937578		1.05	0.937426		1.05	0.93872		1.05	0.938796		1.0501	0.937525
1.1001	0.922925		1.1	0.937302		1.1	0.928945		1.1	0.937451		1.1	0.934533		1.1001	0.936406		1.1001	0.932768		1.1	0.939386		1.1	0.935434		1.1001	0.938476		1.1001	0.935877		1.1001	0.93676		1.1001	0.935841		1.1	0.939433		1.1	0.934936		1.1001	0.9371
1.1501	0.922741		1.1501	0.93691		1.15	0.927963		1.15	0.933402		1.15	0.934194		1.1501	0.932937		1.1501	0.933064		1.15	0.936713		1.15	0.936959		1.1501	0.935647		1.1501	0.936364		1.1501	0.935814		1.1501	0.935013		1.15	0.937237		1.15	0.934106		1.1501	0.936063
1.2001	0.922276		1.2001	0.936263		1.2001	0.926878		1.2	0.934865		1.2	0.928063		1.2001	0.930495		1.2001	0.932486		1.2	0.934937		1.2	0.93212		1.2001	0.935139		1.2001	0.932027		1.2001	0.934849		1.2001	0.932823		1.2	0.935353		1.2	0.9329		1.2001	0.936808
1.2501	0.919029		1.2501	0.933147		1.2501	0.925764		1.25	0.930923		1.25	0.931342		1.2501	0.932693		1.2501	0.929268		1.25	0.933273		1.25	0.934596		1.2501	0.934873		1.2501	0.932921		1.2501	0.935943		1.2501	0.932355		1.25	0.937269		1.25	0.9341		1.2501	0.93348
1.3001	0.919533		1.3001	0.932026		1.3001	0.923768		1.3	0.93083		1.3	0.92921		1.3001	0.930348		1.3001	0.92982		1.3	0.930405		1.3	0.929304		1.3001	0.93258		1.3001	0.931152		1.3001	0.934258		1.3001	0.930547		1.3	0.933212		1.3	0.932981		1.3001	0.931188
1.3501	0.917812		1.3501	0.92966		1.3501	0.92445		1.35	0.932017		1.35	0.927558		1.3501	0.931754		1.3501	0.930125		1.35	0.930619		1.35	0.930016		1.3501	0.927009		1.3501	0.933247		1.3501	0.93383		1.3501	0.928033		1.35	0.932793		1.35	0.933091		1.3501	0.931265
1.4001	0.918334		1.4001	0.931372		1.4001	0.921517		1.4	0.930931		1.4	0.926211		1.4001	0.930929		1.4001	0.928104		1.4	0.929551		1.4	0.928321		1.4001	0.929037		1.4001	0.932208		1.4001	0.932926		1.4001	0.930405		1.4	0.931468		1.4	0.931994		1.4001	0.930291
1.4501	0.914301		1.4501	0.929357		1.4501	0.92199		1.45	0.931309		1.45	0.923581		1.4501	0.927984		1.4501	0.928394		1.4501	0.931236		1.45	0.931421		1.4501	0.929573		1.4501	0.92902		1.4501	0.929585		1.4501	0.930053		1.45	0.933533		1.45	0.931235		1.4501	0.931126
1.5001	0.915869		1.5001	0.928645		1.5001	0.921995		1.5	0.927539		1.5	0.924284		1.5001	0.930282		1.5001	0.928255		1.5001	0.927549		1.5001	0.929817		1.5001	0.927153		1.5001	0.930825		1.5001	0.929942		1.5001	0.93		1.5	0.931609		1.5	0.928809		1.5001	0.932092
1.5501	0.912334		1.5501	0.927974		1.5501	0.920018		1.55	0.92783		1.55	0.92317		1.5501	0.927946		1.5501	0.92987		1.5501	0.92772		1.5501	0.926364		1.5501	0.927049		1.5501	0.926266		1.5501	0.927465		1.5501	0.925752		1.55	0.930064		1.55	0.928256		1.5501	0.928338
1.6001	0.909945		1.6001	0.926362		1.6001	0.921931		1.6	0.923275		1.6	0.921447		1.6001	0.926932		1.6001	0.92518		1.6001	0.924386		1.6001	0.928577		1.6001	0.926194		1.6001	0.927141		1.6001	0.929598		1.6001	0.927481		1.6	0.928141		1.6	0.928405		1.6001	0.927181
1.6501	0.911713		1.6501	0.927859		1.6501	0.918473		1.65	0.926032		1.65	0.92444		1.6501	0.926732		1.6501	0.924516		1.6501	0.930356		1.6501	0.92577		1.6501	0.92814		1.6501	0.92348		1.6501	0.926159		1.6501	0.926962		1.65	0.926657		1.65	0.928673		1.6501	0.927615
1.7001	0.908542		1.7001	0.927615		1.7001	0.91777		1.7	0.924875		1.7	0.92392		1.7001	0.924558		1.7001	0.922452		1.7001	0.92589		1.7001	0.925995		1.7001	0.925642		1.7001	0.922835		1.7001	0.927376		1.7001	0.92258		1.7	0.927688		1.7	0.926264		1.7001	0.926091
1.7501	0.910071		1.7501	0.926145		1.7501	0.916782		1.75	0.924501		1.75	0.918102		1.7501	0.924001		1.7501	0.92273		1.7501	0.924146		1.7501	0.925682		1.7501	0.925966		1.7501	0.921778		1.7501	0.924583		1.7501	0.926392		1.7501	0.927665		1.75	0.925213		1.7501	0.926226
1.8001	0.909609		1.8001	0.924136		1.8001	0.915558		1.8	0.927035		1.8	0.917716		1.8001	0.925058		1.8001	0.921966		1.8001	0.92519		1.8001	0.919995		1.8001	0.922028		1.8001	0.923765		1.8001	0.923344		1.8001	0.921939		1.8001	0.924355		1.8001	0.926752		1.8001	0.923472
1.8501	0.907283		1.8501	0.919572		1.8501	0.914115		1.8501	0.92306		1.85	0.920422		1.8501	0.92161		1.8501	0.921466		1.8501	0.924443		1.8501	0.923723		1.8501	0.923389		1.8501	0.921426		1.8501	0.920986		1.8501	0.921759		1.8501	0.922487		1.8501	0.920866		1.8501	0.921007
1.9001	0.906812		1.9001	0.922939		1.9001	0.914971		1.9001	0.92093		1.9001	0.917536		1.9001	0.922501		1.9001	0.918807		1.9001	0.924327		1.9001	0.922012		1.9001	0.923806		1.9001	0.923304		1.9001	0.921032		1.9001	0.921169		1.9001	0.920864		1.9001	0.92196		1.9001	0.922765
1.9501	0.902777		1.9501	0.921224		1.9501	0.912991		1.9501	0.9213		1.9501	0.919859		1.9501	0.921629		1.9501	0.917731		1.9501	0.920548		1.9501	0.92037		1.9501	0.921833		1.9501	0.91992		1.9501	0.925626		1.9501	0.920345		1.9501	0.923145		1.9501	0.924366		1.9501	0.923647
2.0001	0.903921		2.0001	0.922141		2.0001	0.90926		2.0001	0.919769		2.0001	0.918242		2.0001	0.918231		2.0001	0.916814		2.0001	0.920322		2.0001	0.919199		2.0001	0.919865		2.0001	0.922466		2.0001	0.923191		2.0001	0.918065		2.0001	0.925456		2.0001	0.920844		2.0001	0.921566
2.0501	0.902674		2.0501	0.920469		2.0501	0.909377		2.0501	0.916821		2.0501	0.916798		2.0501	0.920876		2.0501	0.915795		2.0501	0.919387		2.0501	0.917211		2.0501	0.919957		2.0501	0.920362		2.0501	0.920264		2.0501	0.919336		2.0501	0.919546		2.0501	0.920397		2.0501	0.921911
2.1001	0.905255		2.1001	0.921011		2.1001	0.910972		2.1001	0.918194		2.1001	0.916799		2.1001	0.919422		2.1001	0.917056		2.1001	0.919788		2.1001	0.917453		2.1001	0.919515		2.1001	0.918077		2.1001	0.919168		2.1001	0.919542		2.1001	0.921218		2.1001	0.920443		2.1001	0.919902
2.1501	0.902358		2.1501	0.918808		2.1501	0.912142		2.1501	0.92026		2.1501	0.915911		2.1501	0.920699		2.1501	0.915846		2.1501	0.916587		2.1501	0.915606		2.1501	0.919887		2.1501	0.916585		2.1501	0.920369		2.1501	0.917993		2.1501	0.916562		2.1501	0.920788		2.1501	0.916548
2.2001	0.900877		2.2001	0.919707		2.2001	0.907916		2.2001	0.91409		2.2001	0.915388		2.2001	0.917314		2.2001	0.913602		2.2001	0.918651		2.2001	0.918566		2.2002	0.914917		2.2002	0.917548		2.2001	0.919316		2.2001	0.915492		2.2001	0.917756		2.2001	0.920457		2.2001	0.918081
2.2501	0.90188		2.2501	0.917781		2.2501	0.907962		2.2501	0.916113		2.2501	0.91497		2.2501	0.919472		2.2501	0.915697		2.2501	0.91729		2.2501	0.91762		2.2502	0.918474		2.2502	0.913521		2.2501	0.92173		2.2501	0.918565		2.2501	0.916367		2.2501	0.918145		2.2501	0.919911
2.3002	0.90179		2.3001	0.919671		2.3001	0.907784		2.3001	0.916323		2.3001	0.90904		2.3001	0.917079		2.3001	0.91491		2.3001	0.917263		2.3001	0.915104		2.3002	0.917574		2.3002	0.914635		2.3001	0.916152		2.3001	0.917596		2.3001	0.916707		2.3001	0.916651		2.3001	0.91972
2.3502	0.898137		2.3501	0.914627		2.3501	0.908228		2.3501	0.915513		2.3501	0.913855		2.3501	0.916163		2.3501	0.913023		2.3501	0.914134		2.3501	0.917723		2.3502	0.918807		2.3502	0.916501		2.3501	0.914616		2.3501	0.915368		2.3501	0.917962		2.3501	0.916256		2.3501	0.91798
2.4002	0.898301		2.4001	0.917624		2.4001	0.904135		2.4001	0.912427		2.4001	0.913646		2.4001	0.914473		2.4001	0.909455		2.4001	0.916121		2.4001	0.914135		2.4002	0.915137		2.4002	0.912023		2.4001	0.916772		2.4001	0.912838		2.4001	0.916528		2.4001	0.91519		2.4001	0.915762
2.4502	0.897174		2.4501	0.912713		2.4501	0.902775		2.4501	0.913748		2.4501	0.911908		2.4501	0.911709		2.4501	0.908927		2.4501	0.91523		2.4501	0.91567		2.4502	0.915615		2.4502	0.912334		2.4501	0.913225		2.4501	0.912444		2.4501	0.9137		2.4501	0.912405		2.4502	0.915202
2.5002	0.898584		2.5001	0.912673		2.5001	0.903673		2.5001	0.911086		2.5001	0.907542		2.5001	0.913296		2.5001	0.910224		2.5001	0.911831		2.5001	0.913553		2.5002	0.914583		2.5002	0.913449		2.5001	0.912268		2.5001	0.914244		2.5001	0.915192		2.5001	0.913867		2.5002	0.91508
2.5502	0.895982		2.5501	0.91348		2.5501	0.900705		2.5501	0.911678		2.5501	0.910197		2.5501	0.911552		2.5501	0.91094		2.5501	0.911808		2.5501	0.913272		2.5502	0.912461		2.5502	0.911203		2.5501	0.912596		2.5501	0.912139		2.5501	0.915319		2.5501	0.91203		2.5502	0.91389
2.6002	0.895481		2.6001	0.911551		2.6001	0.90078		2.6001	0.912392		2.6001	0.904346		2.6002	0.911211		2.6001	0.907791		2.6001	0.910144		2.6001	0.913798		2.6002	0.91241		2.6002	0.910223		2.6001	0.913943		2.6001	0.910408		2.6001	0.914388		2.6001	0.91291		2.6002	0.913636
2.6502	0.8953		2.6501	0.909993		2.6501	0.899859		2.6501	0.911178		2.6501	0.909289		2.6502	0.913444		2.6502	0.909866		2.6501	0.911449		2.6501	0.910978		2.6502	0.911926		2.6502	0.907693		2.6501	0.913868		2.6501	0.911979		2.6501	0.91401		2.6501	0.912309		2.6502	0.913148
2.7002	0.893011		2.7001	0.910551		2.7001	0.900061		2.7001	0.911227		2.7001	0.906681		2.7002	0.909985		2.7002	0.905964		2.7001	0.913019		2.7001	0.909264		2.7002	0.909872		2.7002	0.910435		2.7001	0.910922		2.7001	0.912982		2.7001	0.913149		2.7001	0.912397		2.7002	0.911733
2.7502	0.891086		2.7501	0.909895		2.7501	0.903364		2.7501	0.914083		2.7501	0.905376		2.7502	0.911545		2.7502	0.909829		2.7501	0.912225		2.7501	0.909109		2.7502	0.911833		2.7502	0.909708		2.7501	0.912764		2.7501	0.912592		2.7501	0.909903		2.7501	0.912487		2.7502	0.911038
2.8002	0.893383		2.8001	0.910487		2.8001	0.900903		2.8001	0.911516		2.8001	0.906303		2.8002	0.909559		2.8002	0.90895		2.8001	0.909227		2.8001	0.907332		2.8002	0.91181		2.8002	0.909663		2.8001	0.910175		2.8001	0.908752		2.8001	0.912983		2.8001	0.908899		2.8002	0.908638
2.8502	0.891295		2.8501	0.910745		2.8501	0.900308		2.8501	0.905348		2.8501	0.904873		2.8502	0.908784		2.8502	0.908554		2.8501	0.908647		2.8501	0.908181		2.8502	0.907053		2.8502	0.910284		2.8501	0.911573		2.8501	0.911126		2.8501	0.911179		2.8501	0.910974		2.8502	0.911381
2.9002	0.892717		2.9001	0.906606		2.9001	0.898808		2.9001	0.908284		2.9001	0.9061		2.9002	0.909433		2.9002	0.905792		2.9001	0.907094		2.9001	0.908963		2.9002	0.908391		2.9002	0.906983		2.9002	0.909723		2.9001	0.908905		2.9001	0.911557		2.9001	0.91069		2.9002	0.909265
2.9502	0.891265		2.9502	0.90555		2.9501	0.897772		2.9501	0.910126		2.9501	0.903776		2.9502	0.905748		2.9502	0.905653		2.9501	0.90716		2.9501	0.907498		2.9502	0.908726		2.9502	0.907045		2.9502	0.909347		2.9502	0.908727		2.9501	0.909609		2.9501	0.905748		2.9502	0.908193
3.0002	0.890763		3.0002	0.906405		3.0002	0.899916		3.0001	0.906569		3.0001	0.904077		3.0002	0.908286		3.0002	0.904373		3.0001	0.90502		3.0001	0.904554		3.0002	0.910196		3.0002	0.904877		3.0002	0.910364		3.0002	0.909057		3.0001	0.906429		3.0001	0.908832		3.0002	0.908262
3.0502	0.884926		3.0502	0.908015		3.0502	0.897706		3.0501	0.906001		3.0501	0.903524		3.0502	0.908286		3.0502	0.904893		3.0501	0.90605		3.0501	0.907183		3.0502	0.909686		3.0502	0.903723		3.0502	0.908776		3.0502	0.906821		3.0501	0.908418		3.0501	0.908949		3.0502	0.906962
3.1002	0.888024		3.1002	0.908898		3.1002	0.89535		3.1001	0.905811		3.1001	0.901587		3.1002	0.905786		3.1002	0.903504		3.1001	0.906036		3.1001	0.908869		3.1002	0.906212		3.1002	0.903979		3.1002	0.909018		3.1002	0.906148		3.1001	0.909015		3.1001	0.908102		3.1002	0.907082
3.1502	0.888388		3.1502	0.908107		3.1502	0.89599		3.1501	0.905186		3.1501	0.904029		3.1502	0.906057		3.1502	0.902284		3.1501	0.908086		3.1501	0.906218		3.1502	0.90718		3.1502	0.903905		3.1502	0.905819		3.1502	0.903521		3.1501	0.906866		3.1501	0.908145		3.1502	0.906389
3.2002	0.889171		3.2002	0.906852		3.2002	0.898189		3.2001	0.904925		3.2001	0.900299		3.2002	0.903194		3.2002	0.90216		3.2001	0.907059		3.2001	0.903607		3.2002	0.907392		3.2002	0.903983		3.2002	0.907513		3.2002	0.90753		3.2001	0.906135		3.2001	0.905506		3.2002	0.905367
3.2502	0.889214		3.2502	0.904631		3.2502	0.897574		3.2501	0.905628		3.2501	0.902247		3.2502	0.905132		3.2502	0.903032		3.2501	0.90379		3.2501	0.905353		3.2502	0.907521		3.2502	0.903614		3.2502	0.907089		3.2502	0.904341		3.2501	0.906422		3.2501	0.904043		3.2502	0.9045
3.3002	0.887485		3.3002	0.904454		3.3002	0.893378		3.3001	0.90647		3.3001	0.899485		3.3002	0.90305		3.3002	0.901903		3.3002	0.904703		3.3001	0.904877		3.3002	0.905324		3.3002	0.904435		3.3002	0.908576		3.3002	0.903821		3.3001	0.904419		3.3001	0.90149		3.3002	0.904533
3.3502	0.886134		3.3502	0.905137		3.3502	0.894537		3.3501	0.901482		3.3501	0.897735		3.3502	0.900434		3.3502	0.901456		3.3502	0.902509		3.3502	0.90246		3.3502	0.90339		3.3502	0.902807		3.3502	0.905197		3.3502	0.905841		3.3501	0.905508		3.3501	0.901352		3.3502	0.908337
3.4002	0.882985		3.4002	0.903912		3.4002	0.891416		3.4001	0.900576		3.4001	0.898921		3.4002	0.903871		3.4002	0.902305		3.4002	0.905198		3.4002	0.899211		3.4002	0.907031		3.4002	0.901842		3.4002	0.905816		3.4002	0.902844		3.4001	0.904783		3.4001	0.905502		3.4002	0.903379
3.4502	0.886728		3.4502	0.900005		3.4502	0.895295		3.4501	0.901938		3.4501	0.899901		3.4502	0.904889		3.4502	0.900361		3.4502	0.902996		3.4502	0.901341		3.4502	0.901638		3.4502	0.903232		3.4502	0.902959		3.4502	0.900676		3.4501	0.905275		3.4501	0.90255		3.4502	0.901859
3.5002	0.881262		3.5002	0.903769		3.5002	0.892812		3.5001	0.906095		3.5001	0.898666		3.5002	0.902572		3.5002	0.900204		3.5002	0.90044		3.5002	0.902359		3.5002	0.901838		3.5002	0.899418		3.5002	0.905631		3.5002	0.900589		3.5001	0.903322		3.5001	0.901707		3.5002	0.901808
3.5502	0.882652		3.5502	0.903567		3.5502	0.892112		3.5501	0.899195		3.5501	0.897866		3.5502	0.901809		3.5502	0.89893		3.5502	0.90123		3.5502	0.899468		3.5502	0.903451		3.5502	0.898411		3.5502	0.900955		3.5502	0.897172		3.5501	0.902762		3.5501	0.899837		3.5502	0.901429
3.6002	0.882311		3.6002	0.901945		3.6002	0.891292		3.6001	0.900783		3.6001	0.896704		3.6002	0.899484		3.6002	0.901744		3.6002	0.900272		3.6002	0.896535		3.6002	0.898536		3.6002	0.899496		3.6002	0.900111		3.6002	0.901711		3.6002	0.902805		3.6002	0.900562		3.6002	0.903187
3.6502	0.881307		3.6502	0.900124		3.6502	0.888605		3.6501	0.901493		3.6501	0.895546		3.6502	0.900097		3.6502	0.898133		3.6502	0.900378		3.6502	0.900428		3.6502	0.900834		3.6502	0.899569		3.6502	0.900923		3.6502	0.898242		3.6502	0.9046		3.6502	0.90283		3.6502	0.903132
3.7002	0.882207		3.7002	0.900371		3.7002	0.890649		3.7002	0.899132		3.7001	0.893244		3.7002	0.902491		3.7002	0.895404		3.7002	0.899209		3.7002	0.901425		3.7002	0.898363		3.7002	0.899715		3.7002	0.902478		3.7002	0.901174		3.7002	0.902583		3.7002	0.897575		3.7002	0.896823
3.7502	0.880596		3.7502	0.898728		3.7502	0.888532		3.7502	0.899544		3.7502	0.897349		3.7502	0.898596		3.7502	0.89855		3.7502	0.899		3.7502	0.89998		3.7502	0.900345		3.7502	0.896755		3.7502	0.897785		3.7502	0.897763		3.7502	0.900563		3.7502	0.899238		3.7502	0.900707
3.8002	0.876629		3.8002	0.902331		3.8002	0.89267		3.8002	0.899886		3.8002	0.892827		3.8002	0.900644		3.8002	0.894654		3.8002	0.899381		3.8002	0.898748		3.8002	0.901207		3.8002	0.897944		3.8002	0.90146		3.8002	0.900766		3.8002	0.901424		3.8002	0.901033		3.8002	0.901458
3.8502	0.879156		3.8502	0.899265		3.8502	0.886735		3.8502	0.897623		3.8502	0.894724		3.8502	0.898915		3.8502	0.897435		3.8502	0.898555		3.8502	0.896048		3.8502	0.897224		3.8502	0.900095		3.8502	0.898809		3.8502	0.899715		3.8502	0.90143		3.8502	0.898017		3.8502	0.8988
3.9002	0.880467		3.9002	0.899332		3.9002	0.887851		3.9002	0.897292		3.9002	0.895843		3.9002	0.898708		3.9002	0.896141		3.9002	0.898545		3.9002	0.898374		3.9002	0.900463		3.9002	0.89861		3.9002	0.899206		3.9002	0.89578		3.9002	0.899126		3.9002	0.90096		3.9002	0.896169
3.9502	0.880267		3.9502	0.899427		3.9502	0.888707		3.9502	0.899156		3.9502	0.891943		3.9502	0.895331		3.9502	0.89626		3.9502	0.899162		3.9502	0.894575		3.9502	0.899611		3.9502	0.896578		3.9502	0.894433		3.9502	0.899099		3.9502	0.901305		3.9502	0.898159		3.9502	0.899813
4.0002	0.879579		4.0002	0.89546		4.0002	0.887778		4.0002	0.898224		4.0002	0.89267		4.0002	0.897889		4.0002	0.897377		4.0002	0.897451		4.0002	0.895687		4.0003	0.899248		4.0002	0.897561		4.0002	0.895711		4.0002	0.897828		4.0002	0.899887		4.0002	0.897321		4.0002	0.897172
4.0502	0.878622		4.0502	0.899202		4.0502	0.884055		4.0502	0.893468		4.0502	0.893864		4.0502	0.89955		4.0502	0.89397		4.0502	0.897289		4.0502	0.895741		4.0503	0.89986		4.0503	0.894928		4.0502	0.895238		4.0502	0.89524		4.0502	0.896293		4.0502	0.896143		4.0502	0.899435
4.1002	0.875288		4.1002	0.897627		4.1002	0.884066		4.1002	0.893835		4.1002	0.892466		4.1002	0.897305		4.1002	0.891095		4.1002	0.895688		4.1002	0.895611		4.1003	0.894913		4.1003	0.895595		4.1002	0.897878		4.1002	0.895185		4.1002	0.895817		4.1002	0.896286		4.1002	0.899911
4.1503	0.874941		4.1502	0.897582		4.1502	0.883926		4.1502	0.897253		4.1502	0.889548		4.1502	0.898306		4.1502	0.889607		4.1502	0.895877		4.1502	0.893065		4.1503	0.895053		4.1503	0.894671		4.1502	0.897458		4.1502	0.893519		4.1502	0.896022		4.1502	0.896061		4.1502	0.896475
4.2003	0.878238		4.2002	0.892829		4.2002	0.883707		4.2002	0.893821		4.2002	0.889767		4.2002	0.894692		4.2002	0.892827		4.2002	0.897012		4.2002	0.893997		4.2003	0.895712		4.2003	0.894804		4.2002	0.894172		4.2002	0.895198		4.2002	0.895236		4.2002	0.896767		4.2002	0.896117
4.2503	0.874422		4.2502	0.894226		4.2502	0.883795		4.2502	0.89294		4.2502	0.889835		4.2502	0.895296		4.2502	0.891061		4.2502	0.895534		4.2502	0.893701		4.2503	0.894965		4.2503	0.89052		4.2502	0.898403		4.2502	0.897935		4.2502	0.894528		4.2502	0.895526		4.2502	0.89566
4.3003	0.873377		4.3002	0.894268		4.3002	0.883758		4.3002	0.893345		4.3002	0.888402		4.3002	0.893516		4.3002	0.89038		4.3002	0.895611		4.3002	0.890366		4.3003	0.898942		4.3003	0.893692		4.3002	0.896524		4.3002	0.892357		4.3002	0.895864		4.3002	0.895078		4.3003	0.895414
4.3503	0.874794		4.3502	0.894946		4.3502	0.881131		4.3502	0.895903		4.3502	0.888489		4.3502	0.895076		4.3502	0.890298		4.3502	0.892283		4.3502	0.894801		4.3503	0.894354		4.3503	0.895738		4.3502	0.894033		4.3502	0.892194		4.3502	0.895944		4.3502	0.895155		4.3503	0.893108
4.4003	0.873057		4.4002	0.893801		4.4002	0.881804		4.4002	0.892047		4.4002	0.88928		4.4003	0.892422		4.4002	0.892142		4.4002	0.896624		4.4002	0.895505		4.4003	0.89386		4.4003	0.890943		4.4002	0.895061		4.4002	0.891653		4.4002	0.893091		4.4002	0.896211		4.4003	0.895125
4.4503	0.871512		4.4502	0.895381		4.4502	0.881464		4.4502	0.891969		4.4502	0.887262		4.4503	0.893692		4.4503	0.888965		4.4502	0.892481		4.4502	0.892558		4.4503	0.895022		4.4503	0.893159		4.4502	0.892615		4.4502	0.893563		4.4502	0.89309		4.4502	0.893883		4.4503	0.894559
4.5003	0.874002		4.5002	0.893962		4.5002	0.882321		4.5002	0.8936		4.5002	0.888889		4.5003	0.893928		4.5003	0.8909		4.5002	0.892706		4.5002	0.892504		4.5003	0.894276		4.5003	0.895461		4.5002	0.891496		4.5002	0.894491		4.5002	0.893863		4.5002	0.893338		4.5003	0.893761
4.5503	0.872955		4.5502	0.891995		4.5502	0.881762		4.5502	0.890124		4.5502	0.885951		4.5503	0.892931		4.5503	0.890864		4.5502	0.892376		4.5502	0.889686		4.5503	0.893561		4.5503	0.891501		4.5502	0.892082		4.5502	0.893287		4.5502	0.896203		4.5502	0.894419		4.5503	0.894356
4.6003	0.870898		4.6002	0.891354		4.6002	0.881069		4.6002	0.892785		4.6002	0.886094		4.6003	0.889711		4.6003	0.887385		4.6002	0.891677		4.6002	0.888135		4.6003	0.893414		4.6003	0.890727		4.6002	0.895154		4.6002	0.891888		4.6002	0.892861		4.6002	0.890634		4.6003	0.893196
4.6503	0.870761		4.6502	0.888595		4.6502	0.879883		4.6502	0.889311		4.6502	0.887811		4.6503	0.89013		4.6503	0.885285		4.6502	0.891233		4.6502	0.890221		4.6503	0.892492		4.6503	0.890332		4.6502	0.892047		4.6502	0.892047		4.6502	0.892479		4.6502	0.893909		4.6503	0.893721
4.7003	0.873411		4.7002	0.890363		4.7002	0.88071		4.7002	0.888962		4.7002	0.888657		4.7003	0.890693		4.7003	0.88738		4.7002	0.892123		4.7002	0.892633		4.7003	0.89239		4.7003	0.890627		4.7003	0.895721		4.7002	0.891534		4.7002	0.892673		4.7002	0.88931		4.7003	0.891832
4.7503	0.871114		4.7502	0.891301		4.7502	0.880281		4.7502	0.887685		4.7502	0.887532		4.7503	0.890956		4.7503	0.887219		4.7502	0.893533		4.7502	0.889506		4.7503	0.893163		4.7503	0.889199		4.7503	0.88783		4.7503	0.889379		4.7502	0.891292		4.7502	0.892099		4.7503	0.891509
4.8003	0.868699		4.8003	0.891568		4.8002	0.879705		4.8002	0.888766		4.8002	0.886372		4.8003	0.890671		4.8003	0.886155		4.8002	0.888099		4.8002	0.887513		4.8003	0.892113		4.8003	0.892111		4.8003	0.891436		4.8003	0.891256		4.8002	0.892446		4.8002	0.893023		4.8003	0.891619
4.8503	0.870511		4.8503	0.891133		4.8503	0.879513		4.8502	0.889556		4.8502	0.884807		4.8503	0.891458		4.8503	0.887436		4.8502	0.887822		4.8502	0.887711		4.8503	0.88976		4.8503	0.889757		4.8503	0.890944		4.8503	0.892101		4.8502	0.892694		4.8502	0.891744		4.8503	0.888151
4.9003	0.869571		4.9003	0.88738		4.9003	0.878451		4.9002	0.889727		4.9002	0.882619		4.9003	0.886501		4.9003	0.88603		4.9002	0.887774		4.9002	0.890494		4.9003	0.88751		4.9003	0.888105		4.9003	0.892595		4.9003	0.891386		4.9002	0.891706		4.9002	0.888796		4.9003	0.890427
4.9503	0.868003		4.9503	0.889744		4.9503	0.878792		4.9502	0.890949		4.9502	0.88488		4.9503	0.887373		4.9503	0.885224		4.9502	0.887493		4.9502	0.887295		4.9503	0.888749		4.9503	0.887983		4.9503	0.888606		4.9503	0.888524		4.9502	0.889423		4.9502	0.8913		4.9503	0.891452
5.0003	0.868441		5.0003	0.88827		5.0003	0.878366		5.0002	0.88729		5.0002	0.883799		5.0003	0.889624		5.0003	0.887596		5.0002	0.891048		5.0002	0.887781		5.0003	0.886367		5.0003	0.887188		5.0003	0.888087		5.0003	0.888332		5.0002	0.88994		5.0002	0.891147		5.0003	0.894036
5.0503	0.869299		5.0503	0.889407		5.0503	0.878075		5.0502	0.88796		5.0502	0.883449		5.0503	0.887254		5.0503	0.886428		5.0502	0.886983		5.0502	0.887274		5.0503	0.887673		5.0503	0.890046		5.0503	0.887594		5.0503	0.88501		5.0502	0.89083		5.0502	0.88856		5.0503	0.89073
5.1003	0.870953		5.1003	0.888349		5.1003	0.874555		5.1002	0.888354		5.1002	0.885643		5.1003	0.889645		5.1003	0.885466		5.1003	0.888015		5.1002	0.885828		5.1003	0.888312		5.1003	0.885922		5.1003	0.888481		5.1003	0.888253		5.1002	0.889089		5.1002	0.888416		5.1003	0.89097
5.1503	0.864926		5.1503	0.887617		5.1503	0.878315		5.1502	0.889509		5.1502	0.883187		5.1503	0.886732		5.1503	0.884936		5.1503	0.887326		5.1503	0.887313		5.1503	0.887255		5.1503	0.888189		5.1503	0.89004		5.1503	0.888795		5.1502	0.890734		5.1502	0.888114		5.1503	0.886802
5.2003	0.866874		5.2003	0.89023		5.2003	0.875103		5.2002	0.885089		5.2002	0.882348		5.2003	0.887872		5.2003	0.884384		5.2003	0.886078		5.2003	0.889328		5.2003	0.887628		5.2003	0.885324		5.2003	0.88761		5.2003	0.883715		5.2002	0.888375		5.2002	0.888621		5.2003	0.889422
5.2503	0.86569		5.2503	0.888258		5.2503	0.87315		5.2502	0.885666		5.2502	0.883336		5.2503	0.887608		5.2503	0.884188		5.2503	0.883866		5.2503	0.886346		5.2503	0.885853		5.2503	0.8859		5.2503	0.888297		5.2503	0.885842		5.2502	0.888875		5.2502	0.886179		5.2503	0.886473
5.3003	0.864886		5.3003	0.886596		5.3003	0.877047		5.3002	0.887637		5.3002	0.879843		5.3003	0.886065		5.3003	0.884422		5.3003	0.887677		5.3003	0.882351		5.3003	0.887345		5.3003	0.887638		5.3003	0.885842		5.3003	0.88684		5.3002	0.890103		5.3002	0.888039		5.3003	0.88862
5.3503	0.86644		5.3503	0.88845		5.3503	0.875191		5.3502	0.886263		5.3502	0.880561		5.3503	0.888866		5.3503	0.882939		5.3503	0.887301		5.3503	0.884086		5.3503	0.886992		5.3503	0.885036		5.3503	0.890119		5.3503	0.88773		5.3502	0.890254		5.3502	0.88771		5.3503	0.887019
5.4003	0.865281		5.4003	0.88378		5.4003	0.875502		5.4002	0.885084		5.4002	0.881105		5.4003	0.885447		5.4003	0.883684		5.4003	0.884027		5.4003	0.884915		5.4003	0.885552		5.4003	0.886416		5.4003	0.884711		5.4003	0.885303		5.4003	0.88827		5.4002	0.885782		5.4003	0.886053
5.4503	0.863745		5.4503	0.885125		5.4503	0.873637		5.4502	0.885884		5.4502	0.881116		5.4503	0.883096		5.4503	0.881975		5.4503	0.887667		5.4503	0.885811		5.4503	0.885819		5.4503	0.886455		5.4503	0.885949		5.4503	0.883982		5.4503	0.887846		5.4503	0.887181		5.4503	0.885308
5.5003	0.863936		5.5003	0.885306		5.5003	0.874542		5.5003	0.885123		5.5002	0.881817		5.5003	0.885653		5.5003	0.878856		5.5003	0.885463		5.5003	0.88362		5.5003	0.885013		5.5003	0.886246		5.5003	0.88436		5.5003	0.886133		5.5003	0.887467		5.5003	0.887849		5.5003	0.885806
5.5503	0.862707		5.5503	0.88458		5.5503	0.875252		5.5503	0.883315		5.5503	0.882185		5.5503	0.887147		5.5503	0.883344		5.5503	0.88331		5.5503	0.8858		5.5503	0.884454		5.5503	0.884184		5.5503	0.885776		5.5503	0.883095		5.5503	0.88696		5.5503	0.884411		5.5503	0.886069
5.6003	0.865597		5.6003	0.887133		5.6003	0.87531		5.6003	0.883428		5.6003	0.881978		5.6003	0.885331		5.6003	0.880195		5.6003	0.882955		5.6003	0.883338		5.6003	0.884271		5.6003	0.881545		5.6003	0.882652		5.6003	0.883988		5.6003	0.883333		5.6003	0.883731		5.6003	0.885417
5.6503	0.860382		5.6503	0.882863		5.6503	0.871313		5.6503	0.883147		5.6503	0.878925		5.6503	0.883425		5.6503	0.880833		5.6503	0.88368		5.6503	0.884205		5.6503	0.885318		5.6503	0.883481		5.6503	0.886472		5.6503	0.88432		5.6503	0.885038		5.6503	0.883901		5.6503	0.884257
5.7003	0.862416		5.7003	0.884567		5.7003	0.871353		5.7003	0.883256		5.7003	0.878761		5.7003	0.884285		5.7003	0.881043		5.7003	0.884109		5.7003	0.880489		5.7003	0.887677		5.7003	0.881918		5.7003	0.885626		5.7003	0.881584		5.7003	0.88703		5.7003	0.884489		5.7003	0.882138
5.7503	0.862567		5.7503	0.882781		5.7503	0.872405		5.7503	0.882594		5.7503	0.879858		5.7503	0.882892		5.7503	0.879007		5.7503	0.887077		5.7503	0.883589		5.7503	0.883693		5.7503	0.878322		5.7503	0.883262		5.7503	0.884161		5.7503	0.885989		5.7503	0.886075		5.7503	0.884782
5.8003	0.863078		5.8003	0.883547		5.8003	0.870716		5.8003	0.883728		5.8003	0.880056		5.8003	0.882636		5.8003	0.879015		5.8003	0.881893		5.8003	0.882857		5.8003	0.880382		5.8003	0.882968		5.8003	0.883685		5.8003	0.884331		5.8003	0.885104		5.8003	0.884723		5.8003	0.885401
5.8503	0.861593		5.8503	0.884136		5.8503	0.870933		5.8503	0.883539		5.8503	0.877945		5.8503	0.881686		5.8503	0.877538		5.8503	0.880579		5.8503	0.882463		5.8504	0.882308		5.8504	0.882002		5.8503	0.884571		5.8503	0.882264		5.8503	0.885758		5.8503	0.883419		5.8503	0.885154
5.9003	0.862043		5.9003	0.882774		5.9003	0.871117		5.9003	0.881539		5.9003	0.878857		5.9003	0.882302		5.9003	0.879233		5.9003	0.883186		5.9003	0.884098		5.9004	0.885222		5.9004	0.880735		5.9003	0.886401		5.9003	0.882873		5.9003	0.886741		5.9003	0.883215		5.9003	0.885092
5.9504	0.860861		5.9503	0.884224		5.9503	0.870098		5.9503	0.882451		5.9503	0.877052		5.9503	0.883487		5.9503	0.878259		5.9503	0.882459		5.9503	0.876621		5.9504	0.879106		5.9504	0.880992		5.9503	0.88169		5.9503	0.882765		5.9503	0.884348		5.9503	0.883055		5.9503	0.885406
6.0004	0.860084		6.0003	0.882693		6.0003	0.870453		6.0003	0.886038		6.0003	0.878247		6.0003	0.879362		6.0003	0.875492		6.0003	0.883956		6.0003	0.877888		6.0004	0.880662		6.0004	0.87986		6.0003	0.881164		6.0003	0.879183		6.0003	0.883727		6.0003	0.883521		6.0003	0.883985
6.0504	0.860642		6.0503	0.879196		6.0503	0.867968		6.0503	0.879444		6.0503	0.876488		6.0503	0.879116		6.0503	0.881468		6.0503	0.88041		6.0503	0.8823		6.0504	0.88207		6.0504	0.878126		6.0503	0.880428		6.0503	0.880919		6.0503	0.883529		6.0503	0.88236		6.0503	0.882948
6.1004	0.860157		6.1003	0.881918		6.1003	0.870336		6.1003	0.879047		6.1003	0.876347		6.1003	0.882706		6.1003	0.875865		6.1003	0.882391		6.1003	0.880155		6.1004	0.881339		6.1004	0.880684		6.1003	0.882833		6.1003	0.880364		6.1003	0.882631		6.1003	0.884071		6.1004	0.88284
6.1504	0.86099		6.1503	0.88168		6.1503	0.869176		6.1503	0.880787		6.1503	0.877683		6.1503	0.878143		6.1503	0.879385		6.1503	0.879477		6.1503	0.881158		6.1504	0.88082		6.1504	0.878925		6.1503	0.882359		6.1503	0.879979		6.1503	0.883532		6.1503	0.883313		6.1504	0.885491
6.2004	0.858555		6.2003	0.881581		6.2003	0.870782		6.2003	0.880115		6.2003	0.876293		6.2003	0.882349		6.2003	0.877391		6.2003	0.879718		6.2003	0.880034		6.2004	0.881454		6.2004	0.880826		6.2003	0.881857		6.2003	0.879343		6.2003	0.883129		6.2003	0.882102		6.2004	0.884002
6.2504	0.859858		6.2503	0.881395		6.2503	0.867722		6.2503	0.882753		6.2503	0.874361		6.2504	0.880231		6.2503	0.876712		6.2503	0.879268		6.2503	0.879914		6.2504	0.880279		6.2504	0.877434		6.2503	0.8807		6.2503	0.880041		6.2503	0.882819		6.2503	0.881498		6.2504	0.878415
6.3004	0.858744		6.3003	0.880098		6.3003	0.869291		6.3003	0.879862		6.3003	0.876207		6.3004	0.882946		6.3004	0.87698		6.3003	0.88043		6.3003	0.877795		6.3004	0.877517		6.3004	0.87965		6.3003	0.882062		6.3003	0.881124		6.3003	0.881875		6.3003	0.879988		6.3004	0.881235
6.3504	0.855922		6.3503	0.880328		6.3503	0.868961		6.3503	0.878714		6.3503	0.876752		6.3504	0.882071		6.3504	0.879238		6.3503	0.879017		6.3503	0.879729		6.3504	0.879278		6.3504	0.877561		6.3503	0.879524		6.3503	0.880389		6.3503	0.879665		6.3503	0.880691		6.3504	0.882138
6.4004	0.85658		6.4003	0.882217		6.4003	0.869333		6.4003	0.878874		6.4003	0.87383		6.4004	0.880396		6.4004	0.876938		6.4003	0.87761		6.4003	0.877359		6.4004	0.878587		6.4004	0.880006		6.4003	0.880505		6.4003	0.877797		6.4003	0.883475		6.4003	0.880287		6.4004	0.880406
6.4504	0.859889		6.4503	0.881914		6.4503	0.867198		6.4503	0.879845		6.4503	0.874441		6.4504	0.877592		6.4504	0.873993		6.4503	0.878533		6.4503	0.878399		6.4504	0.877895		6.4504	0.878489		6.4503	0.878393		6.4503	0.880516		6.4503	0.882005		6.4503	0.880333		6.4504	0.879548
6.5004	0.855854		6.5003	0.882042		6.5003	0.866673		6.5003	0.881307		6.5003	0.873956		6.5004	0.879929		6.5004	0.876284		6.5003	0.877326		6.5003	0.878075		6.5004	0.879934		6.5004	0.878995		6.5003	0.878843		6.5003	0.878072		6.5003	0.880311		6.5003	0.878576		6.5004	0.880059
6.5504	0.85814		6.5503	0.879391		6.5503	0.866716		6.5503	0.876187		6.5503	0.870693		6.5504	0.878374		6.5504	0.874517		6.5503	0.880203		6.5503	0.875953		6.5504	0.88021		6.5504	0.873063		6.5504	0.881023		6.5503	0.882181		6.5503	0.878968		6.5503	0.87905		6.5504	0.88045
6.6004	0.8552		6.6004	0.879982		6.6003	0.866477		6.6003	0.882135		6.6003	0.874732		6.6004	0.87626		6.6004	0.873657		6.6003	0.878882		6.6003	0.876264		6.6004	0.881042		6.6004	0.876179		6.6004	0.876491		6.6004	0.877886		6.6003	0.881242		6.6003	0.878381		6.6004	0.878465
6.6504	0.854504		6.6504	0.879194		6.6504	0.867092		6.6503	0.877549		6.6503	0.872813		6.6504	0.879093		6.6504	0.875806		6.6503	0.877119		6.6503	0.875068		6.6504	0.880268		6.6504	0.877729		6.6504	0.87775		6.6504	0.879122		6.6503	0.881631		6.6503	0.877834		6.6504	0.87867
6.7004	0.854017		6.7004	0.879676		6.7004	0.865143		6.7003	0.875536		6.7003	0.873868		6.7004	0.880686		6.7004	0.874487		6.7003	0.875525		6.7003	0.874261		6.7004	0.876832		6.7004	0.878139		6.7004	0.874776		6.7004	0.878478		6.7003	0.877837		6.7003	0.879971		6.7004	0.879669
6.7504	0.85574		6.7504	0.87626		6.7504	0.865259		6.7503	0.879275		6.7503	0.870323		6.7504	0.876765		6.7504	0.875962		6.7503	0.878384		6.7503	0.875932		6.7504	0.880981		6.7504	0.87709		6.7504	0.88204		6.7504	0.874821		6.7503	0.881509		6.7503	0.879842		6.7504	0.879242
6.8004	0.856922		6.8004	0.877286		6.8004	0.866308		6.8003	0.878059		6.8003	0.870728		6.8004	0.878131		6.8004	0.872315		6.8003	0.879945		6.8003	0.873262		6.8004	0.877514		6.8004	0.876302		6.8004	0.879566		6.8004	0.879057		6.8003	0.878302		6.8003	0.878095		6.8004	0.879945
6.8504	0.853175		6.8504	0.876808		6.8504	0.864484		6.8503	0.878809		6.8503	0.875508		6.8504	0.875816		6.8504	0.872846		6.8503	0.878621		6.8503	0.873489		6.8504	0.875273		6.8504	0.877099		6.8504	0.875186		6.8504	0.876287		6.8503	0.877311		6.8503	0.87901		6.8504	0.877971
6.9004	0.854489		6.9004	0.878019		6.9004	0.865479		6.9003	0.877068		6.9003	0.872889		6.9004	0.876273		6.9004	0.871781		6.9004	0.878494		6.9003	0.874338		6.9004	0.877521		6.9004	0.873266		6.9004	0.874776		6.9004	0.879764		6.9003	0.879325		6.9003	0.876819		6.9004	0.878455
6.9504	0.85508		6.9504	0.875398		6.9504	0.86257		6.9503	0.877415		6.9503	0.87235		6.9504	0.876194		6.9504	0.873995		6.9504	0.878395		6.9503	0.875536		6.9504	0.87795		6.9504	0.876708		6.9504	0.878873		6.9504	0.876732		6.9503	0.875867		6.9503	0.874954		6.9504	0.87787
7.0004	0.851539		7.0004	0.875883		7.0004	0.864783		7.0003	0.874457		7.0003	0.869513		7.0004	0.876067		7.0004	0.873333		7.0004	0.874389		7.0004	0.872158		7.0004	0.875492		7.0004	0.873372		7.0004	0.876182		7.0004	0.875925		7.0003	0.878166		7.0003	0.872719		7.0004	0.87929
7.0504	0.850974		7.0504	0.877255		7.0504	0.86387		7.0503	0.874496		7.0503	0.87161		7.0504	0.876741		7.0504	0.870757		7.0504	0.874562		7.0504	0.875741		7.0504	0.875004		7.0504	0.873929		7.0504	0.878281		7.0504	0.875728		7.0503	0.875973		7.0503	0.876245		7.0504	0.875066
7.1004	0.850707		7.1004	0.876869		7.1004	0.863771		7.1003	0.875259		7.1003	0.872467		7.1004	0.874487		7.1004	0.872358		7.1004	0.875581		7.1004	0.873258		7.1004	0.876152		7.1004	0.8746		7.1004	0.875978		7.1004	0.878042		7.1003	0.876681		7.1003	0.877587		7.1004	0.878946
7.1504	0.852733		7.1504	0.877601		7.1504	0.862536		7.1503	0.875282		7.1503	0.868461		7.1504	0.877201		7.1504	0.871607		7.1504	0.876441		7.1504	0.869997		7.1504	0.877234		7.1504	0.876346		7.1504	0.873928		7.1504	0.876057		7.1503	0.875314		7.1503	0.87861		7.1504	0.87666
7.2004	0.852576		7.2004	0.875413		7.2004	0.860075		7.2003	0.876584		7.2003	0.86972		7.2004	0.875968		7.2004	0.871405		7.2004	0.873365		7.2004	0.873409		7.2004	0.877786		7.2004	0.873241		7.2004	0.878602		7.2004	0.877178		7.2004	0.87614		7.2003	0.876051		7.2004	0.874777
7.2504	0.850692		7.2504	0.875509		7.2504	0.864461		7.2503	0.87693		7.2503	0.871876		7.2504	0.875868		7.2504	0.872425		7.2504	0.874366		7.2504	0.872876		7.2504	0.875769		7.2504	0.872879		7.2504	0.878286		7.2504	0.874618		7.2504	0.879076		7.2504	0.874445		7.2504	0.876014
7.3004	0.852007		7.3004	0.878014		7.3004	0.863708		7.3003	0.875305		7.3003	0.870886		7.3004	0.876545		7.3004	0.869405		7.3004	0.874661		7.3004	0.874856		7.3004	0.876021		7.3004	0.87349		7.3004	0.877986		7.3004	0.874331		7.3004	0.877738		7.3004	0.876274		7.3004	0.876044
7.3504	0.85035		7.3504	0.87696		7.3504	0.861095		7.3504	0.873162		7.3503	0.869644		7.3504	0.875871		7.3504	0.872324		7.3504	0.872164		7.3504	0.872393		7.3504	0.873573		7.3504	0.875086		7.3504	0.873116		7.3504	0.873287		7.3504	0.876182		7.3504	0.87346		7.3504	0.876508
7.4004	0.851161		7.4004	0.875753		7.4004	0.861161		7.4004	0.871512		7.4004	0.869816		7.4004	0.873913		7.4004	0.870302		7.4004	0.874181		7.4004	0.874217		7.4004	0.874188		7.4004	0.87212		7.4004	0.873573		7.4004	0.875105		7.4004	0.876606		7.4004	0.873269		7.4004	0.876083
7.4504	0.850658		7.4504	0.874575		7.4504	0.861156		7.4504	0.872778		7.4504	0.87047		7.4504	0.873628		7.4504	0.870861		7.4504	0.87165		7.4504	0.87281		7.4504	0.873003		7.4504	0.869528		7.4504	0.876046		7.4504	0.872666		7.4504	0.880001		7.4504	0.877382		7.4504	0.874808
7.5004	0.850156		7.5004	0.87469		7.5004	0.862411		7.5004	0.871715		7.5004	0.869448		7.5004	0.873064		7.5004	0.870726		7.5004	0.873581		7.5004	0.871509		7.5004	0.872076		7.5004	0.872068		7.5004	0.874295		7.5004	0.871334		7.5004	0.876338		7.5004	0.872158		7.5004	0.872875
7.5504	0.850591		7.5504	0.872712		7.5504	0.861473		7.5504	0.874659		7.5504	0.869653		7.5504	0.873862		7.5504	0.870588		7.5504	0.875769		7.5504	0.871707		7.5504	0.87306		7.5504	0.871568		7.5504	0.873566		7.5504	0.874233		7.5504	0.874024		7.5504	0.874066		7.5504	0.874827
7.6004	0.851796		7.6004	0.874933		7.6004	0.86043		7.6004	0.873947		7.6004	0.868116		7.6004	0.873549		7.6004	0.867985		7.6004	0.876231		7.6004	0.870739		7.6004	0.873881		7.6004	0.871494		7.6004	0.87395		7.6004	0.871225		7.6004	0.87642		7.6004	0.873321		7.6004	0.875405
7.6504	0.850459		7.6504	0.876564		7.6504	0.857904		7.6504	0.871445		7.6504	0.865256		7.6504	0.873668		7.6504	0.867539		7.6504	0.871612		7.6504	0.869703		7.6505	0.872927		7.6505	0.871928		7.6504	0.874852		7.6504	0.874271		7.6504	0.874908		7.6504	0.872781		7.6504	0.875948
7.7004	0.849806		7.7004	0.872596		7.7004	0.86016		7.7004	0.873234		7.7004	0.868246		7.7004	0.872557		7.7004	0.869859		7.7004	0.873382		7.7004	0.872997		7.7005	0.872367		7.7005	0.871509		7.7004	0.871632		7.7004	0.873085		7.7004	0.876384		7.7004	0.875323		7.7004	0.872411
7.7504	0.850415		7.7504	0.872634		7.7504	0.860851		7.7504	0.870825		7.7504	0.867552		7.7504	0.871002		7.7504	0.870891		7.7504	0.872871		7.7504	0.8725		7.7505	0.872009		7.7505	0.870438		7.7504	0.872938		7.7504	0.87104		7.7504	0.876126		7.7504	0.873468		7.7504	0.877892
7.8005	0.850034		7.8004	0.873899		7.8004	0.857108		7.8004	0.872258		7.8004	0.867547		7.8004	0.873108		7.8004	0.867906		7.8004	0.869501		7.8004	0.871114		7.8005	0.872271		7.8005	0.872156		7.8004	0.873508		7.8004	0.871527		7.8004	0.872619		7.8004	0.873247		7.8004	0.873875
7.8505	0.848475		7.8504	0.871998		7.8504	0.858628		7.8504	0.873147		7.8504	0.865351		7.8504	0.870593		7.8504	0.868748		7.8504	0.873132		7.8504	0.872515		7.8505	0.87377		7.8505	0.870501		7.8504	0.876745		7.8504	0.873152		7.8504	0.874075		7.8504	0.873883		7.8504	0.873349
7.9005	0.847489		7.9004	0.871934		7.9004	0.861159		7.9004	0.872856		7.9004	0.866002		7.9004	0.869855		7.9004	0.86844		7.9004	0.87302		7.9004	0.871194		7.9005	0.872739		7.9005	0.870865		7.9004	0.872526		7.9004	0.868907		7.9004	0.873659		7.9004	0.873232		7.9004	0.870399
7.9505	0.848759		7.9504	0.874134		7.9504	0.859201		7.9504	0.870801		7.9504	0.865689		7.9504	0.873568		7.9504	0.867236		7.9504	0.868771		7.9504	0.873065		7.9505	0.87108		7.9505	0.870886		7.9504	0.870064		7.9504	0.873651		7.9504	0.875705		7.9504	0.870761		7.9505	0.874318
8.0005	0.848027		8.0004	0.871401		8.0004	0.85698		8.0004	0.872047		8.0004	0.86572		8.0004	0.868769		8.0004	0.867618		8.0004	0.86863		8.0004	0.869519		8.0005	0.875323		8.0005	0.868838		8.0004	0.873016		8.0004	0.868288		8.0004	0.875074		8.0004	0.872647		8.0005	0.86981
8.0505	0.84884		8.0504	0.871417		8.0504	0.858579		8.0504	0.87325		8.0504	0.866689		8.0505	0.871249		8.0504	0.870204		8.0504	0.869426		8.0504	0.871434		8.0505	0.869657		8.0505	0.871131		8.0504	0.872861		8.0504	0.872258		8.0504	0.875619		8.0504	0.870201		8.0505	0.87188
8.1005	0.848063		8.1004	0.871985		8.1004	0.856096		8.1004	0.870312		8.1004	0.867744		8.1005	0.869471		8.1005	0.869235		8.1004	0.871106		8.1004	0.866762		8.1005	0.871247		8.1005	0.868876		8.1004	0.871625		8.1004	0.872793		8.1004	0.872309		8.1004	0.870478		8.1005	0.872014
8.1505	0.84778		8.1504	0.869987		8.1504	0.858051		8.1504	0.868937		8.1504	0.866476		8.1505	0.872582		8.1505	0.870819		8.1504	0.870568		8.1504	0.869163		8.1505	0.870368		8.1505	0.869224		8.1504	0.870448		8.1504	0.870214		8.1504	0.87423		8.1504	0.868807		8.1505	0.870353
8.2005	0.845869		8.2004	0.871799		8.2004	0.85557		8.2004	0.867747		8.2004	0.866276		8.2005	0.868507		8.2005	0.867236		8.2004	0.870547		8.2004	0.867748		8.2005	0.872603		8.2005	0.868489		8.2004	0.871679		8.2004	0.869464		8.2004	0.871369		8.2004	0.870593		8.2005	0.871926
8.2505	0.848979		8.2504	0.871368		8.2504	0.857191		8.2504	0.868701		8.2504	0.864252		8.2505	0.869274		8.2505	0.863928		8.2504	0.869393		8.2504	0.867236		8.2505	0.869255		8.2505	0.869845		8.2504	0.870604		8.2504	0.868886		8.2504	0.870846		8.2504	0.870478		8.2505	0.872447
8.3005	0.84639		8.3004	0.868517		8.3004	0.856622		8.3004	0.86998		8.3004	0.868001		8.3005	0.86835		8.3005	0.866764		8.3004	0.871793		8.3004	0.870641		8.3005	0.869006		8.3005	0.867879		8.3004	0.871393		8.3004	0.869188		8.3004	0.873632		8.3004	0.869234		8.3005	0.869012
8.3505	0.844526		8.3504	0.867805		8.3504	0.856058		8.3504	0.868874		8.3504	0.864038		8.3505	0.868749		8.3505	0.867204		8.3504	0.868568		8.3504	0.866572		8.3505	0.870559		8.3505	0.866998		8.3505	0.868714		8.3504	0.870835		8.3504	0.871607		8.3504	0.868816		8.3505	0.870151
8.4005	0.845605		8.4005	0.870993		8.4004	0.855529		8.4004	0.869236		8.4004	0.864276		8.4005	0.871388		8.4005	0.865417		8.4004	0.871055		8.4004	0.866481		8.4005	0.870169		8.4005	0.868479		8.4005	0.870802		8.4005	0.870447		8.4004	0.867919		8.4004	0.870538		8.4005	0.87155
8.4505	0.84489		8.4505	0.869363		8.4504	0.856782		8.4504	0.869394		8.4504	0.864158		8.4505	0.867684		8.4505	0.867412		8.4504	0.868703		8.4504	0.871232		8.4505	0.871067		8.4505	0.870829		8.4505	0.86991		8.4505	0.867752		8.4504	0.8705		8.4504	0.869536		8.4505	0.870881
8.5005	0.847439		8.5005	0.870133		8.5005	0.85916		8.5004	0.87027		8.5004	0.863927		8.5005	0.868738		8.5005	0.865937		8.5004	0.870268		8.5004	0.867933		8.5005	0.870325		8.5005	0.865686		8.5005	0.870393		8.5005	0.867388		8.5004	0.869358		8.5004	0.869772		8.5005	0.870227
8.5505	0.840834		8.5505	0.870494		8.5505	0.855698		8.5504	0.868995		8.5504	0.863869		8.5505	0.870218		8.5505	0.864196		8.5504	0.868231		8.5504	0.867875		8.5505	0.869384		8.5505	0.870856		8.5505	0.872779		8.5505	0.86741		8.5504	0.871849		8.5504	0.871025		8.5505	0.870544
8.6005	0.846052		8.6005	0.871148		8.6005	0.855483		8.6004	0.867573		8.6004	0.864599		8.6005	0.86788		8.6005	0.866524		8.6004	0.867593		8.6004	0.864727		8.6005	0.867881		8.6005	0.867474		8.6005	0.869002		8.6005	0.868599		8.6004	0.87035		8.6004	0.86684		8.6005	0.869679
8.6505	0.845183		8.6505	0.867228		8.6505	0.852136		8.6504	0.867821		8.6504	0.861568		8.6505	0.866751		8.6505	0.865108		8.6504	0.868481		8.6504	0.867546		8.6505	0.868265		8.6505	0.867478		8.6505	0.869574		8.6505	0.868806		8.6504	0.868994		8.6504	0.867225		8.6505	0.870099
8.7005	0.844435		8.7005	0.867566		8.7005	0.857802		8.7004	0.869062		8.7004	0.863462		8.7005	0.868093		8.7005	0.864094		8.7004	0.866513		8.7004	0.866916		8.7005	0.867382		8.7005	0.865587		8.7005	0.870794		8.7005	0.86897		8.7004	0.872656		8.7004	0.866714		8.7005	0.871229
8.7505	0.845534		8.7505	0.870402		8.7505	0.853816		8.7504	0.867134		8.7504	0.861193		8.7505	0.865302		8.7505	0.862999		8.7505	0.870478		8.7504	0.867319		8.7505	0.868606		8.7505	0.867982		8.7505	0.869831		8.7505	0.867039		8.7504	0.869566		8.7504	0.868943		8.7505	0.873105
8.8005	0.84309		8.8005	0.868035		8.8005	0.854693		8.8004	0.865565		8.8004	0.865752		8.8005	0.867702		8.8005	0.864379		8.8005	0.867947		8.8005	0.867934		8.8005	0.869868		8.8005	0.866277		8.8005	0.866786		8.8005	0.866546		8.8004	0.872176		8.8004	0.867159		8.8005	0.86853
8.8505	0.84546		8.8505	0.868779		8.8505	0.857959		8.8504	0.870201		8.8504	0.862351		8.8505	0.867478		8.8505	0.861615		8.8505	0.867699		8.8505	0.863798		8.8505	0.867795		8.8505	0.865534		8.8505	0.869818		8.8505	0.865814		8.8504	0.871154		8.8504	0.86834		8.8505	0.868528
8.9005	0.842537		8.9005	0.865231		8.9005	0.854885		8.9004	0.867525		8.9004	0.861863		8.9005	0.868905		8.9005	0.86309		8.9005	0.867494		8.9005	0.86465		8.9005	0.867875		8.9005	0.866742		8.9005	0.868568		8.9005	0.865906		8.9004	0.870291		8.9004	0.867737		8.9005	0.868493
8.9505	0.844295		8.9505	0.86714		8.9505	0.852717		8.9504	0.870991		8.9504	0.862897		8.9505	0.869		8.9505	0.865153		8.9505	0.866034		8.9505	0.865538		8.9505	0.869696		8.9505	0.864796		8.9505	0.869801		8.9505	0.867796		8.9504	0.869836		8.9504	0.869019		8.9505	0.870755
9.0005	0.846062		9.0005	0.866759		9.0005	0.854482		9.0004	0.86847		9.0004	0.861315		9.0005	0.867465		9.0005	0.864246		9.0005	0.86621		9.0005	0.864397		9.0005	0.86667		9.0005	0.866043		9.0005	0.867312		9.0005	0.866836		9.0004	0.867893		9.0004	0.866746		9.0005	0.868258
9.0505	0.842318		9.0505	0.865135		9.0505	0.853642		9.0504	0.86917		9.0504	0.864048		9.0505	0.869252		9.0505	0.86248		9.0505	0.866263		9.0505	0.862994		9.0505	0.870992		9.0505	0.86427		9.0505	0.865954		9.0505	0.866638		9.0505	0.869215		9.0504	0.864357		9.0505	0.868471
9.1005	0.843228		9.1005	0.866869		9.1005	0.854066		9.1004	0.868765		9.1004	0.859121		9.1005	0.867242		9.1005	0.862662		9.1005	0.868266		9.1005	0.864313		9.1005	0.866905		9.1005	0.86631		9.1005	0.867032		9.1005	0.865712		9.1005	0.865688		9.1005	0.865069		9.1005	0.868738
9.1505	0.841868		9.1505	0.869239		9.1505	0.854619		9.1505	0.866796		9.1504	0.860342		9.1505	0.867294		9.1505	0.860903		9.1505	0.863413		9.1505	0.865743		9.1505	0.866078		9.1505	0.866384		9.1505	0.869916		9.1505	0.86601		9.1505	0.869681		9.1505	0.864855		9.1505	0.867212
9.2005	0.843195		9.2005	0.866952		9.2005	0.851061		9.2005	0.870081		9.2005	0.861162		9.2005	0.865428		9.2005	0.862094		9.2005	0.866158		9.2005	0.865512		9.2005	0.868423		9.2005	0.865292		9.2005	0.865892		9.2005	0.864628		9.2005	0.870584		9.2005	0.866021		9.2005	0.869496
9.2505	0.844088		9.2505	0.868246		9.2505	0.856191		9.2505	0.866718		9.2505	0.858258		9.2505	0.866781		9.2505	0.864076		9.2505	0.864184		9.2505	0.864334		9.2505	0.867128		9.2505	0.863992		9.2505	0.866913		9.2505	0.866763		9.2505	0.869422		9.2505	0.866081		9.2505	0.866214
9.3005	0.841816		9.3005	0.870012		9.3005	0.853013		9.3005	0.867589		9.3005	0.861329		9.3005	0.864255		9.3005	0.860467		9.3005	0.864624		9.3005	0.864677		9.3005	0.865944		9.3005	0.865189		9.3005	0.868495		9.3005	0.866077		9.3005	0.867554		9.3005	0.866639		9.3005	0.867121
9.3505	0.841874		9.3505	0.867569		9.3505	0.851318		9.3505	0.86598		9.3505	0.860237		9.3505	0.867418		9.3505	0.861714		9.3505	0.864315		9.3505	0.864489		9.3505	0.867604		9.3505	0.864662		9.3505	0.867225		9.3505	0.865487		9.3505	0.867126		9.3505	0.867759		9.3505	0.866901
9.4005	0.841694		9.4005	0.868301		9.4005	0.856185		9.4005	0.865805		9.4005	0.861569		9.4005	0.866448		9.4005	0.864878		9.4005	0.867816		9.4005	0.86429		9.4005	0.865752		9.4005	0.864076		9.4005	0.867013		9.4005	0.863496		9.4005	0.86904		9.4005	0.867993		9.4005	0.863957
9.4505	0.841416		9.4505	0.864119		9.4505	0.851103		9.4505	0.867964		9.4505	0.860226		9.4505	0.864663		9.4505	0.861229		9.4505	0.865721		9.4505	0.863756		9.4505	0.867474		9.4505	0.86342		9.4505	0.868953		9.4505	0.868579		9.4505	0.867557		9.4505	0.865475		9.4505	0.867844
9.5005	0.841139		9.5005	0.86616		9.5005	0.852828		9.5005	0.866579		9.5005	0.857399		9.5005	0.86413		9.5005	0.862378		9.5005	0.864934		9.5005	0.864637		9.5006	0.865896		9.5006	0.867022		9.5005	0.865703		9.5005	0.865341		9.5005	0.868694		9.5005	0.865363		9.5005	0.866482
9.5505	0.840695		9.5505	0.866456		9.5505	0.849939		9.5505	0.866138		9.5505	0.860544		9.5505	0.862229		9.5505	0.861602		9.5505	0.863283		9.5505	0.863773		9.5506	0.866021		9.5506	0.863151		9.5505	0.866384		9.5505	0.866005		9.5505	0.867429		9.5505	0.865475		9.5505	0.865673
9.6006	0.839376		9.6005	0.867953		9.6005	0.851661		9.6005	0.865817		9.6005	0.859918		9.6005	0.86711		9.6005	0.859845		9.6005	0.863224		9.6005	0.863654		9.6006	0.867573		9.6006	0.861615		9.6005	0.865823		9.6005	0.866932		9.6005	0.867196		9.6005	0.864187		9.6005	0.867187
9.6506	0.842496		9.6505	0.867168		9.6505	0.852418		9.6505	0.867157		9.6505	0.859027		9.6505	0.868772		9.6505	0.861079		9.6505	0.864057		9.6505	0.863967		9.6506	0.86601		9.6506	0.863152		9.6505	0.868544		9.6505	0.863198		9.6505	0.866403		9.6505	0.865627		9.6505	0.869321
9.7006	0.84099		9.7005	0.868324		9.7005	0.852757		9.7005	0.86556		9.7005	0.858337		9.7005	0.863493		9.7005	0.862268		9.7005	0.868529		9.7005	0.862278		9.7006	0.865806		9.7006	0.86327		9.7005	0.869189		9.7005	0.864954		9.7005	0.86559		9.7005	0.867648		9.7005	0.866669
9.7506	0.838989		9.7505	0.86614		9.7505	0.853227		9.7505	0.866217		9.7505	0.855774		9.7505	0.863295		9.7505	0.861321		9.7505	0.86415		9.7505	0.862362		9.7506	0.867837		9.7506	0.86594		9.7505	0.865238		9.7505	0.864402		9.7505	0.863432		9.7505	0.865438		9.7506	0.86606
9.8006	0.840164		9.8005	0.864661		9.8005	0.851812		9.8005	0.86435		9.8005	0.858723		9.8005	0.864182		9.8005	0.858439		9.8005	0.864006		9.8005	0.862056		9.8006	0.86506		9.8006	0.862927		9.8005	0.865111		9.8005	0.863376		9.8005	0.866228		9.8005	0.865534		9.8006	0.866494
9.8506	0.838576		9.8505	0.866044		9.8505	0.851271		9.8505	0.862799		9.8505	0.85708		9.8505	0.866863		9.8505	0.858691		9.8505	0.864596		9.8505	0.861693		9.8506	0.865564		9.8506	0.863544		9.8505	0.862226		9.8505	0.863614		9.8505	0.867168		9.8505	0.863595		9.8506	0.864917
9.9006	0.839863		9.9005	0.86412		9.9005	0.850892		9.9005	0.865808		9.9005	0.858249		9.9006	0.864422		9.9006	0.86096		9.9005	0.862951		9.9005	0.861874		9.9006	0.865054		9.9006	0.862744		9.9005	0.86375		9.9005	0.865196		9.9005	0.86671		9.9005	0.863094		9.9006	0.866194
9.9506	0.840483		9.9505	0.863625		9.9505	0.852373		9.9505	0.863817		9.9505	0.855387		9.9506	0.863788		9.9506	0.855556		9.9505	0.863226		9.9505	0.863202		9.9506	0.862292		9.9506	0.863273		9.9505	0.865205		9.9505	0.861408		9.9505	0.867871		9.9505	0.868615		9.9506	0.866288
10.0006	0.836713		10.0005	0.863318		10.0005	0.851875		10.0005	0.865216		10.0005	0.856347		10.0006	0.864102		10.0006	0.858442		10.0005	0.86231		10.0005	0.860083		10.0006	0.864616		10.0006	0.864705		10.0005	0.865487		10.0005	0.863765		10.0005	0.865202		10.0005	0.863603		10.0006	0.86563
10.0506	0.841587		10.0505	0.863577		10.0505	0.851203		10.0505	0.86455		10.0505	0.859807		10.0506	0.864886		10.0506	0.859483		10.0505	0.865618		10.0505	0.862943		10.0506	0.86376		10.0506	0.861777		10.0505	0.861681		10.0505	0.862636		10.0505	0.865054		10.0505	0.860564		10.0506	0.860625
10.1006	0.838681		10.1005	0.864243		10.1005	0.85103		10.1005	0.863981		10.1005	0.856818		10.1006	0.864267		10.1006	0.858891		10.1005	0.863682		10.1005	0.863328		10.1006	0.866257		10.1006	0.861875		10.1005	0.86615		10.1005	0.86356		10.1005	0.865016		10.1005	0.86663		10.1006	0.862052
10.1506	0.83715		10.1505	0.864977		10.1505	0.851583		10.1505	0.862658		10.1505	0.857902		10.1506	0.862735		10.1506	0.859338		10.1505	0.864389		10.1505	0.861597		10.1506	0.865593		10.1506	0.865747		10.1505	0.864454		10.1505	0.861328		10.1505	0.867028		10.1505	0.862287		10.1506	0.866053
10.2006	0.836671		10.2005	0.862612		10.2005	0.851088		10.2005	0.862932		10.2005	0.857404		10.2006	0.862438		10.2006	0.857336		10.2005	0.862226		10.2005	0.860764		10.2006	0.863509		10.2006	0.86265		10.2006	0.866476		10.2006	0.863813		10.2005	0.862785		10.2005	0.861549		10.2006	0.865398
10.2506	0.837138		10.2506	0.867596		10.2505	0.850258		10.2505	0.864643		10.2505	0.859186		10.2506	0.862041		10.2506	0.85694		10.2505	0.861724		10.2505	0.859428		10.2506	0.862402		10.2506	0.862511		10.2506	0.862731		10.2506	0.864121		10.2505	0.865547		10.2505	0.864587		10.2506	0.863789
10.3006	0.840575		10.3006	0.864099		10.3006	0.850809		10.3005	0.864518		10.3005	0.85518		10.3006	0.864147		10.3006	0.85716		10.3005	0.863192		10.3005	0.860484		10.3006	0.864312		10.3006	0.859632		10.3006	0.867301		10.3006	0.860215		10.3005	0.864074		10.3005	0.862402		10.3006	0.865916
10.3506	0.839467		10.3506	0.862508		10.3506	0.849265		10.3505	0.861893		10.3505	0.856996		10.3506	0.864912		10.3506	0.858315		10.3505	0.862866		10.3505	0.862127		10.3506	0.862061		10.3506	0.859833		10.3506	0.864938		10.3506	0.864175		10.3505	0.867131		10.3505	0.861459		10.3506	0.86309
10.4006	0.836534		10.4006	0.861469		10.4006	0.848816		10.4005	0.862906		10.4005	0.856402		10.4006	0.864557		10.4006	0.857829		10.4005	0.864744		10.4005	0.860402		10.4006	0.868001		10.4006	0.861047		10.4006	0.863328		10.4006	0.862887		10.4005	0.864974		10.4005	0.865111		10.4006	0.862732
10.4506	0.841508		10.4506	0.863176		10.4506	0.850385		10.4505	0.862641		10.4505	0.858738		10.4506	0.862584		10.4506	0.858392		10.4505	0.8625		10.4505	0.85937		10.4506	0.862835		10.4506	0.862391		10.4506	0.864623		10.4506	0.863611		10.4505	0.863706		10.4505	0.864475		10.4506	0.864682
10.5006	0.838094		10.5006	0.861305		10.5006	0.847628		10.5005	0.865972		10.5005	0.857782		10.5006	0.861906		10.5006	0.857597		10.5005	0.864606		10.5005	0.860966		10.5006	0.863286		10.5006	0.860775		10.5006	0.862602		10.5006	0.860155		10.5005	0.866033		10.5005	0.85979		10.5006	0.866909
10.5506	0.838792		10.5506	0.861544		10.5506	0.849285		10.5505	0.86233		10.5505	0.857172		10.5506	0.863474		10.5506	0.857994		10.5505	0.861086		10.5505	0.858464		10.5506	0.863939		10.5506	0.860241		10.5506	0.864571		10.5506	0.858821		10.5505	0.865243		10.5505	0.860399		10.5506	0.861054
10.6006	0.838489		10.6006	0.860299		10.6006	0.848782		10.6005	0.861433		10.6005	0.855809		10.6006	0.861256		10.6006	0.857581		10.6006	0.858431		10.6005	0.858522		10.6006	0.863657		10.6006	0.860639		10.6006	0.862652		10.6006	0.864713		10.6005	0.866757		10.6005	0.863055		10.6006	0.863759
10.6506	0.836908		10.6506	0.864005		10.6506	0.850541		10.6505	0.860557		10.6505	0.854191		10.6506	0.862792		10.6506	0.85692		10.6506	0.861759		10.6506	0.859959		10.6506	0.860195		10.6506	0.859977		10.6506	0.864021		10.6506	0.861521		10.6505	0.864999		10.6505	0.861414		10.6506	0.861935
10.7006	0.838361		10.7006	0.863024		10.7006	0.848517		10.7005	0.863081		10.7005	0.856983		10.7006	0.862665		10.7006	0.855671		10.7006	0.861892		10.7006	0.863241		10.7006	0.862313		10.7006	0.86523		10.7006	0.862775		10.7006	0.863219		10.7005	0.86396		10.7005	0.863834		10.7006	0.863271
10.7506	0.836424		10.7506	0.860978		10.7506	0.848196		10.7505	0.863504		10.7505	0.855147		10.7506	0.863522		10.7506	0.855878		10.7506	0.860209		10.7506	0.859243		10.7506	0.861124		10.7506	0.861204		10.7506	0.86417		10.7506	0.861752		10.7505	0.864888		10.7505	0.859231		10.7506	0.865004
10.8006	0.834518		10.8006	0.863461		10.8006	0.850326		10.8005	0.863609		10.8005	0.855744		10.8006	0.862546		10.8006	0.855179		10.8006	0.860688		10.8006	0.859086		10.8006	0.864074		10.8006	0.858792		10.8006	0.864163		10.8006	0.860488		10.8005	0.863961		10.8005	0.860678		10.8006	0.861291
10.8506	0.83735		10.8506	0.861313		10.8506	0.850111		10.8505	0.860383		10.8505	0.857619		10.8506	0.862065		10.8506	0.856326		10.8506	0.860494		10.8506	0.859234		10.8506	0.865668		10.8506	0.858922		10.8506	0.862477		10.8506	0.861422		10.8506	0.862771		10.8505	0.858883		10.8506	0.861419
10.9006	0.837808		10.9006	0.861739		10.9006	0.847227		10.9005	0.861401		10.9005	0.855642		10.9006	0.862682		10.9006	0.857297		10.9006	0.862391		10.9006	0.860183		10.9006	0.862049		10.9006	0.861666		10.9006	0.863845		10.9006	0.860783		10.9006	0.864872		10.9006	0.862396		10.9006	0.860802
10.9506	0.834531		10.9506	0.860022		10.9506	0.847587		10.9505	0.865062		10.9505	0.85565		10.9506	0.860635		10.9506	0.857157		10.9506	0.861989		10.9506	0.859738		10.9506	0.862174		10.9506	0.857398		10.9506	0.862427		10.9506	0.863061		10.9506	0.862135		10.9506	0.862649		10.9506	0.862393
11.0006	0.835707		11.0006	0.861394		11.0006	0.847463		11.0006	0.862196		11.0005	0.854974		11.0006	0.862817		11.0006	0.854487		11.0006	0.862208		11.0006	0.859216		11.0006	0.862971		11.0006	0.858954		11.0006	0.862063		11.0006	0.862452		11.0006	0.861125		11.0006	0.864801		11.0006	0.863341
11.0506	0.837372		11.0506	0.861317		11.0506	0.847591		11.0506	0.861691		11.0506	0.853077		11.0506	0.860374		11.0506	0.858416		11.0506	0.858019		11.0506	0.857747		11.0506	0.86283		11.0506	0.860915		11.0506	0.864069		11.0506	0.860223		11.0506	0.862187		11.0506	0.859222		11.0506	0.862427
11.1006	0.83715		11.1006	0.860152		11.1006	0.848644		11.1006	0.860304		11.1006	0.856356		11.1006	0.859192		11.1006	0.857468		11.1006	0.859693		11.1006	0.857722		11.1006	0.860813		11.1006	0.860466		11.1006	0.858813		11.1006	0.861262		11.1006	0.860889		11.1006	0.859193		11.1006	0.863127
11.1506	0.835412		11.1506	0.86088		11.1506	0.850115		11.1506	0.858722		11.1506	0.854757		11.1506	0.863427		11.1506	0.854943		11.1506	0.859421		11.1506	0.863361		11.1506	0.86135		11.1506	0.859991		11.1506	0.859854		11.1506	0.861262		11.1506	0.862185		11.1506	0.862751		11.1506	0.863711
11.2006	0.836157		11.2006	0.860878		11.2006	0.846009		11.2006	0.86223		11.2006	0.85259		11.2006	0.858979		11.2006	0.856596		11.2006	0.859951		11.2006	0.859929		11.2006	0.862147		11.2006	0.859161		11.2006	0.858024		11.2006	0.860782		11.2006	0.861434		11.2006	0.863448		11.2006	0.859896
11.2506	0.832288		11.2506	0.861293		11.2506	0.846044		11.2506	0.859672		11.2506	0.857097		11.2506	0.8593		11.2506	0.85541		11.2506	0.858861		11.2506	0.856727		11.2506	0.862551		11.2506	0.85715		11.2506	0.860935		11.2506	0.85952		11.2506	0.864422		11.2506	0.857893		11.2506	0.862285
11.3006	0.835182		11.3006	0.861704		11.3006	0.846228		11.3006	0.862047		11.3006	0.854494		11.3006	0.86082		11.3006	0.85438		11.3006	0.860157		11.3006	0.855965		11.3007	0.861715		11.3007	0.859189		11.3006	0.859058		11.3006	0.857953		11.3006	0.865106		11.3006	0.860732		11.3006	0.86458
11.3506	0.833806		11.3506	0.86141		11.3506	0.846345		11.3506	0.859325		11.3506	0.856187		11.3506	0.86246		11.3506	0.856145		11.3506	0.859539		11.3506	0.861266		11.3507	0.860687		11.3507	0.86052		11.3506	0.862755		11.3506	0.858215		11.3506	0.863829		11.3506	0.862023		11.3506	0.860998
11.4006	0.833744		11.4006	0.859864		11.4006	0.84905		11.4006	0.861179		11.4006	0.855635		11.4006	0.861336		11.4006	0.855356		11.4006	0.858642		11.4006	0.857791		11.4007	0.859494		11.4007	0.855939		11.4006	0.86108		11.4006	0.859391		11.4006	0.862079		11.4006	0.860521		11.4006	0.862004
11.4507	0.833011		11.4506	0.859971		11.4506	0.845465		11.4506	0.857884		11.4506	0.856912		11.4506	0.856831		11.4506	0.856713		11.4506	0.859574		11.4506	0.859571		11.4507	0.858317		11.4507	0.857721		11.4506	0.857409		11.4506	0.861575		11.4506	0.859042		11.4506	0.860028		11.4506	0.86076
11.5007	0.835496		11.5006	0.860486		11.5006	0.848597		11.5006	0.860306		11.5006	0.85189		11.5006	0.857679		11.5006	0.854823		11.5006	0.860506		11.5006	0.856883		11.5007	0.861962		11.5007	0.856582		11.5006	0.858967		11.5006	0.861532		11.5006	0.862623		11.5006	0.859969		11.5006	0.859351
11.5507	0.836136		11.5506	0.86285		11.5506	0.846486		11.5506	0.859122		11.5506	0.851483		11.5506	0.860649		11.5506	0.858386		11.5506	0.8592		11.5506	0.857732		11.5507	0.859252		11.5507	0.859653		11.5506	0.86192		11.5506	0.858		11.5506	0.861537		11.5506	0.859204		11.5506	0.859261
11.6007	0.835657		11.6006	0.858981		11.6006	0.844559		11.6006	0.860236		11.6006	0.851434		11.6006	0.859579		11.6006	0.853802		11.6006	0.85842		11.6006	0.857985		11.6007	0.859732		11.6007	0.859032		11.6006	0.861469		11.6006	0.855679		11.6006	0.862017		11.6006	0.859722		11.6007	0.86047
11.6507	0.834276		11.6506	0.860984		11.6506	0.847736		11.6506	0.860737		11.6506	0.853205		11.6506	0.856675		11.6506	0.85204		11.6506	0.858933		11.6506	0.856856		11.6507	0.86277		11.6507	0.855978		11.6506	0.862048		11.6506	0.857618		11.6506	0.863963		11.6506	0.856562		11.6507	0.86315
11.7007	0.83444		11.7006	0.857432		11.7006	0.849371		11.7006	0.860304		11.7006	0.85431		11.7007	0.861273		11.7006	0.854041		11.7006	0.856711		11.7006	0.855672		11.7007	0.860239		11.7007	0.857794		11.7006	0.857946		11.7006	0.860378		11.7006	0.861079		11.7006	0.862089		11.7007	0.862098
11.7507	0.833789		11.7506	0.86043		11.7506	0.844449		11.7506	0.85913		11.7506	0.853593		11.7507	0.859733		11.7507	0.854508		11.7506	0.858713		11.7506	0.856291		11.7507	0.859362		11.7507	0.857937		11.7506	0.861027		11.7506	0.860572		11.7506	0.861046		11.7506	0.858631		11.7507	0.861238
11.8007	0.83447		11.8006	0.858903		11.8006	0.844257		11.8006	0.860799		11.8006	0.853038		11.8007	0.859288		11.8007	0.853088		11.8006	0.857563		11.8006	0.856805		11.8007	0.85897		11.8007	0.85729		11.8006	0.862448		11.8006	0.858457		11.8006	0.862216		11.8006	0.857638		11.8007	0.860552
11.8507	0.832755		11.8506	0.85746		11.8506	0.845885		11.8506	0.857361		11.8506	0.852292		11.8507	0.858897		11.8507	0.856576		11.8506	0.859238		11.8506	0.857113		11.8507	0.858568		11.8507	0.85537		11.8506	0.861275		11.8506	0.857745		11.8506	0.861006		11.8506	0.858168		11.8507	0.859095
11.9007	0.834356		11.9006	0.858821		11.9006	0.844024		11.9006	0.856051		11.9006	0.853338		11.9007	0.85761		11.9007	0.854559		11.9006	0.858781		11.9006	0.857991		11.9007	0.861568		11.9007	0.856152		11.9006	0.858035		11.9006	0.860055		11.9006	0.862783		11.9006	0.85947		11.9007	0.860755
11.9507	0.833589		11.9506	0.857371		11.9506	0.846556		11.9506	0.856659		11.9506	0.853068		11.9507	0.855618		11.9507	0.852723		11.9506	0.858682		11.9506	0.858658		11.9507	0.857492		11.9507	0.856354		11.9506	0.861313		11.9506	0.856637		11.9506	0.861829		11.9506	0.858885		11.9507	0.858926
12.0007	0.83299		12.0006	0.857736		12.0006	0.84367		12.0006	0.857747		12.0006	0.853109		12.0007	0.859421		12.0007	0.855341		12.0006	0.858877		12.0006	0.857271		12.0007	0.858664		12.0007	0.853896		12.0007	0.859014		12.0006	0.858036		12.0006	0.857721		12.0006	0.860903		12.0007	0.85802
12.0507	0.834007		12.0507	0.860656		12.0506	0.844382		12.0506	0.857184		12.0506	0.8516		12.0507	0.858347		12.0507	0.85552		12.0506	0.859911		12.0506	0.855367		12.0507	0.857001		12.0507	0.857271		12.0507	0.859873		12.0507	0.857857		12.0506	0.85981		12.0506	0.856353		12.0507	0.857967
12.1007	0.833175		12.1007	0.859051		12.1006	0.843316		12.1006	0.859941		12.1006	0.851943		12.1007	0.857623		12.1007	0.852351		12.1006	0.857399		12.1006	0.856877		12.1007	0.857327		12.1007	0.857132		12.1007	0.858352		12.1007	0.859421		12.1006	0.861893		12.1006	0.856863		12.1007	0.860139
12.1507	0.834374		12.1507	0.858317		12.1507	0.844731		12.1506	0.859344		12.1506	0.851036		12.1507	0.858774		12.1507	0.851577		12.1506	0.859422		12.1506	0.853918		12.1507	0.860299		12.1507	0.859028		12.1507	0.860086		12.1507	0.857215		12.1506	0.86034		12.1506	0.85693		12.1507	0.860528
12.2007	0.832842		12.2007	0.857594		12.2007	0.845331		12.2006	0.856443		12.2006	0.854589		12.2007	0.859376		12.2007	0.852394		12.2006	0.859622		12.2006	0.854043		12.2007	0.859867		12.2007	0.855078		12.2007	0.858837		12.2007	0.859294		12.2006	0.862623		12.2006	0.860619		12.2007	0.859081
12.2507	0.832571		12.2507	0.857293		12.2507	0.844018		12.2506	0.855681		12.2506	0.852081		12.2507	0.859221		12.2507	0.855428		12.2506	0.858081		12.2506	0.855056		12.2507	0.85839		12.2507	0.858128		12.2507	0.859517		12.2507	0.859385		12.2506	0.861103		12.2506	0.860512		12.2507	0.857443
12.3007	0.832974		12.3007	0.858607		12.3007	0.844265		12.3006	0.857851		12.3006	0.855733		12.3007	0.857271		12.3007	0.853779		12.3006	0.858322		12.3006	0.860564		12.3007	0.860784		12.3007	0.857437		12.3007	0.858476		12.3007	0.858252		12.3006	0.858192		12.3006	0.857266		12.3007	0.859506
12.3507	0.829599		12.3507	0.858959		12.3507	0.845734		12.3506	0.855891		12.3506	0.851078		12.3507	0.855869		12.3507	0.851225		12.3506	0.858243		12.3506	0.856669		12.3507	0.859395		12.3507	0.855849		12.3507	0.862267		12.3507	0.857711		12.3506	0.859499		12.3506	0.857113		12.3507	0.857701
12.4007	0.83379		12.4007	0.857422		12.4007	0.842312		12.4006	0.856868		12.4006	0.849712		12.4007	0.858114		12.4007	0.851106		12.4007	0.856063		12.4006	0.854801		12.4007	0.856705		12.4007	0.85554		12.4007	0.856909		12.4007	0.859396		12.4006	0.856107		12.4006	0.858081		12.4007	0.858794
12.4507	0.83263		12.4507	0.854397		12.4507	0.843838		12.4506	0.858781		12.4506	0.85247		12.4507	0.859101		12.4507	0.853393		12.4507	0.857855		12.4507	0.856886		12.4507	0.856651		12.4507	0.855146		12.4507	0.855375		12.4507	0.858188		12.4506	0.858949		12.4506	0.85643		12.4507	0.858244
12.5007	0.832924		12.5007	0.857233		12.5007	0.842284		12.5006	0.860225		12.5006	0.850141		12.5007	0.858965		12.5007	0.853376		12.5007	0.85795		12.5007	0.856187		12.5007	0.856849		12.5007	0.857562		12.5007	0.855576		12.5007	0.859231		12.5006	0.857957		12.5006	0.857613		12.5007	0.856855
12.5507	0.832558		12.5507	0.858506		12.5507	0.844496		12.5506	0.859811		12.5506	0.849738		12.5507	0.860158		12.5507	0.850969		12.5507	0.855274		12.5507	0.852109		12.5507	0.85682		12.5507	0.858376		12.5507	0.857783		12.5507	0.85774		12.5506	0.857394		12.5506	0.857495		12.5507	0.860923
12.6007	0.832958		12.6007	0.855532		12.6007	0.842231		12.6006	0.860031		12.6006	0.851561		12.6007	0.856262		12.6007	0.852459		12.6007	0.856388		12.6007	0.851445		12.6007	0.855961		12.6007	0.856085		12.6007	0.858829		12.6007	0.856692		12.6006	0.859201		12.6006	0.859139		12.6007	0.862542
12.6507	0.831495		12.6507	0.858569		12.6507	0.84465		12.6506	0.85914		12.6506	0.850146		12.6507	0.857736		12.6507	0.855514		12.6507	0.856607		12.6507	0.852667		12.6507	0.860374		12.6507	0.854016		12.6507	0.85696		12.6507	0.855218		12.6506	0.85853		12.6506	0.858406		12.6507	0.858547
12.7007	0.832544		12.7007	0.85596		12.7007	0.841606		12.7006	0.857074		12.7006	0.850519		12.7007	0.859613		12.7007	0.850592		12.7007	0.856451		12.7007	0.854192		12.7007	0.856359		12.7007	0.855664		12.7007	0.857712		12.7007	0.85805		12.7007	0.859734		12.7006	0.855521		12.7007	0.857229
12.7507	0.831328		12.7507	0.857116		12.7507	0.842122		12.7506	0.856279		12.7506	0.850778		12.7507	0.854914		12.7507	0.852732		12.7507	0.858103		12.7507	0.855136		12.7507	0.859308		12.7507	0.85717		12.7507	0.856053		12.7507	0.855325		12.7507	0.85996		12.7507	0.855771		12.7507	0.858103
12.8007	0.831674		12.8007	0.858634		12.8007	0.843385		12.8007	0.855163		12.8006	0.85018		12.8007	0.856452		12.8007	0.852234		12.8007	0.85799		12.8007	0.855264		12.8007	0.858292		12.8007	0.855978		12.8007	0.857567		12.8007	0.855745		12.8007	0.859685		12.8007	0.860114		12.8007	0.857368
12.8507	0.829312		12.8507	0.857546		12.8507	0.842928		12.8507	0.858251		12.8507	0.849936		12.8507	0.855421		12.8507	0.850871		12.8507	0.85801		12.8507	0.854372		12.8507	0.859582		12.8507	0.855637		12.8507	0.855883		12.8507	0.857904		12.8507	0.861067		12.8507	0.857167		12.8507	0.858538
12.9007	0.831562		12.9007	0.854743		12.9007	0.84254		12.9007	0.856416		12.9007	0.849618		12.9007	0.856424		12.9007	0.851032		12.9007	0.857345		12.9007	0.855478		12.9007	0.855654		12.9007	0.857415		12.9007	0.858445		12.9007	0.855244		12.9007	0.860462		12.9007	0.856955		12.9007	0.856793
12.9507	0.834689		12.9507	0.856321		12.9507	0.844167		12.9507	0.85518		12.9507	0.849648		12.9507	0.854817		12.9507	0.851708		12.9507	0.856958		12.9507	0.853573		12.9507	0.854627		12.9507	0.856679		12.9507	0.856259		12.9507	0.858281		12.9507	0.85746		12.9507	0.857472		12.9507	0.857597
13.0007	0.831261		13.0007	0.856189		13.0007	0.842773		13.0007	0.854985		13.0007	0.848218		13.0007	0.854969		13.0007	0.851199		13.0007	0.856287		13.0007	0.854582		13.0007	0.855662		13.0007	0.854912		13.0007	0.858164		13.0007	0.856377		13.0007	0.860473		13.0007	0.858764		13.0007	0.857354
13.0507	0.829766		13.0507	0.856921		13.0507	0.842241		13.0507	0.856478		13.0507	0.850253		13.0507	0.854661		13.0507	0.848943		13.0507	0.856717		13.0507	0.852338		13.0507	0.857316		13.0507	0.854389		13.0507	0.859462		13.0507	0.856545		13.0507	0.8627		13.0507	0.854785		13.0507	0.859371
13.1007	0.832289		13.1007	0.853782		13.1007	0.844575		13.1007	0.855505		13.1007	0.852168		13.1007	0.856053		13.1007	0.853128		13.1007	0.853825		13.1007	0.853616		13.1008	0.855963		13.1007	0.855203		13.1007	0.857492		13.1007	0.856847		13.1007	0.857244		13.1007	0.85378		13.1007	0.859216
13.1507	0.82888		13.1507	0.856072		13.1507	0.840713		13.1507	0.855139		13.1507	0.848269		13.1507	0.85588		13.1507	0.852092		13.1507	0.855986		13.1507	0.853719		13.1508	0.857995		13.1508	0.853786		13.1507	0.856461		13.1507	0.854457		13.1507	0.857194		13.1507	0.858377		13.1507	0.857666
13.2007	0.828706		13.2007	0.854983		13.2007	0.842429		13.2007	0.858281		13.2007	0.851688		13.2007	0.856555		13.2007	0.852258		13.2007	0.856585		13.2007	0.853359		13.2008	0.856659		13.2008	0.856615		13.2007	0.856041		13.2007	0.857583		13.2007	0.855136		13.2007	0.858058		13.2007	0.857123
13.2508	0.833011		13.2507	0.857779		13.2507	0.840192		13.2507	0.857423		13.2507	0.847895		13.2507	0.853364		13.2507	0.851285		13.2507	0.857461		13.2507	0.853138		13.2508	0.857141		13.2508	0.854835		13.2507	0.856981		13.2507	0.85496		13.2507	0.856013		13.2507	0.855569		13.2507	0.853773
13.3008	0.829376		13.3007	0.855716		13.3007	0.842102		13.3007	0.858897		13.3007	0.848964		13.3007	0.855414		13.3007	0.850122		13.3007	0.855599		13.3007	0.855973		13.3008	0.853961		13.3008	0.855518		13.3007	0.855975		13.3007	0.855886		13.3007	0.855106		13.3007	0.856744		13.3007	0.859695
13.3508	0.830716		13.3507	0.856506		13.3507	0.844464		13.3507	0.85448		13.3507	0.848812		13.3507	0.855289		13.3507	0.849657		13.3507	0.857454		13.3507	0.853631		13.3508	0.856518		13.3508	0.855706		13.3507	0.855569		13.3507	0.855167		13.3507	0.857966		13.3507	0.85519		13.3507	0.858293
13.4008	0.829247		13.4007	0.855696		13.4007	0.842138		13.4007	0.856604		13.4007	0.845535		13.4007	0.858252		13.4007	0.85038		13.4007	0.853967		13.4007	0.852846		13.4008	0.85703		13.4008	0.852161		13.4007	0.85465		13.4007	0.856371		13.4007	0.859469		13.4007	0.855037		13.4008	0.855974
13.4508	0.828675		13.4507	0.855243		13.4507	0.842626		13.4507	0.855477		13.4507	0.848981		13.4507	0.852686		13.4507	0.851228		13.4507	0.856203		13.4507	0.852917		13.4508	0.855667		13.4508	0.851725		13.4507	0.855004		13.4507	0.854668		13.4507	0.859152		13.4507	0.854941		13.4508	0.854509
13.5008	0.82947		13.5007	0.856536		13.5007	0.841745		13.5007	0.853558		13.5007	0.849433		13.5007	0.8546		13.5007	0.85026		13.5007	0.855767		13.5007	0.853099		13.5008	0.853389		13.5008	0.854713		13.5007	0.857886		13.5007	0.855463		13.5007	0.86058		13.5007	0.855645		13.5008	0.854907
13.5508	0.828511		13.5507	0.853861		13.5507	0.841671		13.5507	0.856976		13.5507	0.84561		13.5508	0.853332		13.5508	0.849559		13.5507	0.855198		13.5507	0.853064		13.5508	0.855055		13.5508	0.852702		13.5507	0.856404		13.5507	0.856477		13.5507	0.857804		13.5507	0.857862		13.5508	0.857152
13.6008	0.830262		13.6007	0.854557		13.6007	0.836791		13.6007	0.856884		13.6007	0.850259		13.6008	0.853521		13.6008	0.853124		13.6007	0.855111		13.6007	0.854998		13.6008	0.854799		13.6008	0.850133		13.6007	0.855452		13.6007	0.856282		13.6007	0.858301		13.6007	0.855065		13.6008	0.857187
13.6508	0.830864		13.6507	0.855922		13.6507	0.843445		13.6507	0.854252		13.6507	0.848154		13.6508	0.855018		13.6508	0.848757		13.6507	0.855195		13.6507	0.851429		13.6508	0.856267		13.6508	0.851551		13.6507	0.856436		13.6507	0.85523		13.6507	0.856836		13.6507	0.856195		13.6508	0.856975
13.7008	0.830589		13.7007	0.854049		13.7007	0.84376		13.7007	0.856433		13.7007	0.849204		13.7008	0.855385		13.7008	0.84911		13.7007	0.855404		13.7007	0.85253		13.7008	0.853447		13.7008	0.854391		13.7007	0.858076		13.7007	0.854626		13.7007	0.859082		13.7007	0.854715		13.7008	0.856758
13.7508	0.827284		13.7507	0.858095		13.7507	0.840624		13.7507	0.854394		13.7507	0.852194		13.7508	0.854223		13.7508	0.853366		13.7507	0.856102		13.7507	0.853974		13.7508	0.85599		13.7508	0.852457		13.7507	0.85725		13.7507	0.855516		13.7507	0.856419		13.7507	0.857301		13.7508	0.856124
13.8008	0.829703		13.8007	0.85339		13.8007	0.842007		13.8007	0.855314		13.8007	0.846651		13.8008	0.854025		13.8008	0.849064		13.8007	0.854266		13.8007	0.853129		13.8008	0.857413		13.8008	0.854755		13.8007	0.857091		13.8007	0.855029		13.8007	0.856997		13.8007	0.853716		13.8008	0.858488
13.8508	0.8283		13.8508	0.854911		13.8507	0.837596		13.8507	0.854438		13.8507	0.846537		13.8508	0.854945		13.8508	0.851348		13.8507	0.856205		13.8507	0.852456		13.8508	0.854777		13.8508	0.852171		13.8508	0.857317		13.8508	0.853043		13.8507	0.857375		13.8507	0.854654		13.8508	0.85483
13.9008	0.83103		13.9008	0.858434		13.9007	0.840277		13.9007	0.857165		13.9007	0.846126		13.9008	0.853698		13.9008	0.851222		13.9007	0.852144		13.9007	0.85163		13.9008	0.856233		13.9008	0.853536		13.9008	0.857215		13.9008	0.853137		13.9007	0.856169		13.9007	0.854448		13.9008	0.854113
13.9508	0.828198		13.9508	0.854762		13.9508	0.839638		13.9507	0.855309		13.9507	0.848456		13.9508	0.856228		13.9508	0.850176		13.9507	0.854526		13.9507	0.850225		13.9508	0.853765		13.9508	0.856233		13.9508	0.856414		13.9508	0.853617		13.9507	0.858219		13.9507	0.854993		13.9508	0.856232
14.0008	0.828556		14.0008	0.852937		14.0008	0.840103		14.0007	0.854542		14.0007	0.849268		14.0008	0.854738		14.0008	0.851738		14.0007	0.852062		14.0007	0.85365		14.0008	0.855158		14.0008	0.855276		14.0008	0.854906		14.0008	0.856606		14.0007	0.85598		14.0007	0.854461		14.0008	0.8542
14.0508	0.829523		14.0508	0.854727		14.0508	0.840222		14.0507	0.851528		14.0507	0.847011		14.0508	0.855707		14.0508	0.850957		14.0507	0.854043		14.0507	0.848987		14.0508	0.855688		14.0508	0.850765		14.0508	0.856909		14.0508	0.855282		14.0507	0.857431		14.0507	0.85341		14.0508	0.856389
14.1008	0.82931		14.1008	0.85661		14.1008	0.838958		14.1007	0.855959		14.1007	0.846375		14.1008	0.855169		14.1008	0.848668		14.1007	0.854142		14.1007	0.850794		14.1008	0.855192		14.1008	0.850965		14.1008	0.855665		14.1008	0.85522		14.1007	0.855091		14.1007	0.85403		14.1008	0.854846
14.1508	0.826439		14.1508	0.855416		14.1508	0.838554		14.1507	0.856811		14.1507	0.846999		14.1508	0.855243		14.1508	0.848165		14.1507	0.856551		14.1507	0.8502		14.1508	0.855407		14.1508	0.853068		14.1508	0.856839		14.1508	0.853737		14.1507	0.856719		14.1507	0.854121		14.1508	0.855621
14.2008	0.829813		14.2008	0.853748		14.2008	0.83961		14.2007	0.855306		14.2007	0.849026		14.2008	0.852726		14.2008	0.849203		14.2007	0.851327		14.2007	0.85337		14.2008	0.855907		14.2008	0.853527		14.2008	0.856287		14.2008	0.853163		14.2007	0.855745		14.2007	0.852798		14.2008	0.857034
14.2508	0.828753		14.2508	0.852607		14.2508	0.840195		14.2507	0.853007		14.2507	0.846818		14.2508	0.854389		14.2508	0.851134		14.2508	0.852735		14.2508	0.852644		14.2508	0.850823		14.2508	0.85342		14.2508	0.853432		14.2508	0.853996		14.2507	0.856863		14.2507	0.854122		14.2508	0.854937
14.3008	0.828797		14.3008	0.856175		14.3008	0.841901		14.3007	0.855981		14.3007	0.847277		14.3008	0.855053		14.3008	0.847283		14.3008	0.854641		14.3008	0.852809		14.3008	0.851758		14.3008	0.851473		14.3008	0.854695		14.3008	0.85372		14.3007	0.853724		14.3007	0.8521		14.3008	0.855067
14.3508	0.82768		14.3508	0.85595		14.3508	0.841218		14.3507	0.853212		14.3507	0.847844		14.3508	0.853688		14.3508	0.849226		14.3508	0.852094		14.3508	0.850892		14.3508	0.853146		14.3508	0.850325		14.3508	0.852424		14.3508	0.853182		14.3507	0.858335		14.3507	0.856723		14.3508	0.85703
14.4008	0.827018		14.4008	0.854667		14.4008	0.84182		14.4007	0.853174		14.4007	0.848074		14.4008	0.852569		14.4008	0.848397		14.4008	0.854175		14.4008	0.851696		14.4008	0.853779		14.4008	0.850638		14.4008	0.85185		14.4008	0.853592		14.4007	0.856588		14.4007	0.851565		14.4008	0.852654
14.4508	0.827977		14.4508	0.857013		14.4508	0.837978		14.4507	0.855734		14.4507	0.848745		14.4508	0.853955		14.4508	0.851197		14.4508	0.852696		14.4508	0.85172		14.4508	0.855129		14.4508	0.852152		14.4508	0.855183		14.4508	0.851761		14.4507	0.852153		14.4507	0.854146		14.4508	0.855114
14.5008	0.828518		14.5008	0.854821		14.5008	0.841743		14.5007	0.854956		14.5007	0.848782		14.5008	0.852173		14.5008	0.848063		14.5008	0.851141		14.5008	0.852799		14.5008	0.855845		14.5008	0.851858		14.5008	0.854764		14.5008	0.856091		14.5008	0.858827		14.5007	0.855384		14.5008	0.854345
14.5508	0.828909		14.5508	0.853237		14.5508	0.842138		14.5507	0.854569		14.5507	0.848516		14.5508	0.852526		14.5508	0.847372		14.5508	0.855268		14.5508	0.84906		14.5508	0.856093		14.5508	0.853608		14.5508	0.855182		14.5508	0.8521		14.5508	0.858395		14.5508	0.855397		14.5508	0.855087
14.6008	0.826346		14.6008	0.854405		14.6008	0.842012		14.6008	0.85141		14.6007	0.846964		14.6008	0.852555		14.6008	0.848689		14.6008	0.853399		14.6008	0.853158		14.6008	0.85573		14.6008	0.852793		14.6008	0.854475		14.6008	0.852218		14.6008	0.857643		14.6008	0.853367		14.6008	0.854262
14.6508	0.827681		14.6508	0.853442		14.6508	0.84009		14.6508	0.853049		14.6507	0.84755		14.6508	0.853328		14.6508	0.850798		14.6508	0.853779		14.6508	0.849264		14.6508	0.851927		14.6508	0.853048		14.6508	0.856424		14.6508	0.854169		14.6508	0.855748		14.6508	0.855068		14.6508	0.85618
14.7008	0.827024		14.7008	0.854939		14.7008	0.840171		14.7008	0.852746		14.7008	0.850166		14.7008	0.853312		14.7008	0.848695		14.7008	0.851376		14.7008	0.849785		14.7008	0.85524		14.7008	0.849644		14.7008	0.854796		14.7008	0.853637		14.7008	0.854187		14.7008	0.853305		14.7008	0.851943
14.7508	0.826267		14.7508	0.851885		14.7508	0.839574		14.7508	0.852181		14.7508	0.848416		14.7508	0.852029		14.7508	0.848563		14.7508	0.85323		14.7508	0.852466		14.7508	0.854139		14.7508	0.853668		14.7508	0.853064		14.7508	0.85191		14.7508	0.857154		14.7508	0.855755		14.7508	0.853293
14.8008	0.828763		14.8008	0.853444		14.8008	0.839361		14.8008	0.853885		14.8008	0.846336		14.8008	0.850404		14.8008	0.849532		14.8008	0.853614		14.8008	0.850577		14.8008	0.854241		14.8008	0.85356		14.8008	0.854701		14.8008	0.852131		14.8008	0.856546		14.8008	0.853137		14.8008	0.853966
14.8508	0.829561		14.8508	0.856574		14.8508	0.840601		14.8508	0.852886		14.8508	0.849255		14.8508	0.854201		14.8508	0.846468		14.8508	0.851573		14.8508	0.849903		14.8508	0.852587		14.8508	0.850546		14.8508	0.854503		14.8508	0.85296		14.8508	0.856934		14.8508	0.85488		14.8508	0.853992
14.9008	0.828742		14.9008	0.852363		14.9008	0.839707		14.9008	0.852321		14.9008	0.846326		14.9008	0.852488		14.9008	0.847884		14.9008	0.851381		14.9008	0.849531		14.9008	0.850135		14.9008	0.852171		14.9008	0.853248		14.9008	0.853096		14.9008	0.858048		14.9008	0.850963		14.9008	0.854788
14.9508	0.827754		14.9508	0.85342		14.9508	0.83957		14.9508	0.852541		14.9508	0.845981		14.9508	0.853246		14.9508	0.849561		14.9508	0.851587		14.9508	0.851776		14.9509	0.854082		14.9509	0.853975		14.9508	0.853691		14.9508	0.854738		14.9508	0.856742		14.9508	0.854642		14.9508	0.854284
15.0008	0.828773		15.0008	0.854729		15.0008	0.840707		15.0008	0.856139		15.0008	0.848027		15.0008	0.852067		15.0008	0.848687		15.0008	0.852821		15.0008	0.85239		15.0009	0.853975		15.0009	0.851295		15.0008	0.85408		15.0008	0.853722		15.0008	0.857771		15.0008	0.853798		15.0008	0.856274
15.0508	0.828457		15.0508	0.854021		15.0508	0.840837		15.0508	0.853537		15.0508	0.846948		15.0508	0.851721		15.0508	0.848197		15.0508	0.854186		15.0508	0.848282		15.0509	0.854167		15.0509	0.853051		15.0508	0.85191		15.0508	0.854227		15.0508	0.856161		15.0508	0.850238		15.0508	0.852349
15.1009	0.828055		15.1008	0.85226		15.1008	0.841012		15.1008	0.853732		15.1008	0.847788		15.1008	0.852479		15.1008	0.846921		15.1008	0.850604		15.1008	0.85269		15.1009	0.857522		15.1009	0.851169		15.1008	0.854468		15.1008	0.852887		15.1008	0.855155		15.1008	0.855781		15.1008	0.855653
15.1509	0.828322		15.1508	0.852868		15.1508	0.838318		15.1508	0.854675		15.1508	0.848267		15.1508	0.853688		15.1508	0.848116		15.1508	0.853795		15.1508	0.850333		15.1509	0.853951		15.1509	0.851231		15.1508	0.852706		15.1508	0.853958		15.1508	0.855872		15.1508	0.856381		15.1508	0.85552
15.2009	0.829818		15.2008	0.852453		15.2008	0.839554		15.2008	0.854643		15.2008	0.849059		15.2008	0.851056		15.2008	0.849056		15.2008	0.851919		15.2008	0.848972		15.2009	0.853822		15.2009	0.850039		15.2008	0.855437		15.2008	0.851451		15.2008	0.856878		15.2008	0.853467		15.2009	0.85326
15.2509	0.828289		15.2508	0.8525		15.2508	0.840004		15.2508	0.851886		15.2508	0.844991		15.2508	0.851806		15.2508	0.848813		15.2508	0.853257		15.2508	0.849511		15.2509	0.853297		15.2509	0.847842		15.2508	0.853182		15.2508	0.853373		15.2508	0.854401		15.2508	0.853096		15.2509	0.852198
15.3009	0.827324		15.3008	0.852084		15.3008	0.838724		15.3008	0.853789		15.3008	0.845194		15.3008	0.852877		15.3008	0.849859		15.3008	0.854004		15.3008	0.852387		15.3009	0.854416		15.3009	0.850053		15.3008	0.854114		15.3008	0.853348		15.3008	0.853472		15.3008	0.853341		15.3009	0.853959
15.3509	0.827127		15.3508	0.852621		15.3508	0.835986		15.3508	0.852216		15.3508	0.8459		15.3509	0.853851		15.3508	0.849628		15.3508	0.849911		15.3508	0.848638		15.3509	0.852959		15.3509	0.852168		15.3508	0.857706		15.3508	0.853251		15.3508	0.857473		15.3508	0.853288		15.3509	0.855923
15.4009	0.825647		15.4008	0.851315		15.4008	0.836898		15.4008	0.8514		15.4008	0.846877		15.4009	0.852014		15.4009	0.848035		15.4008	0.851199		15.4008	0.847674		15.4009	0.855685		15.4009	0.848589		15.4008	0.853308		15.4008	0.853684		15.4008	0.857225		15.4008	0.852684		15.4009	0.853784
15.4509	0.826406		15.4508	0.852557		15.4508	0.838871		15.4508	0.850896		15.4508	0.846271		15.4509	0.853425		15.4509	0.849577		15.4508	0.853172		15.4508	0.85117		15.4509	0.852663		15.4509	0.850691		15.4508	0.85251		15.4508	0.851455		15.4508	0.855233		15.4508	0.851863		15.4509	0.84982
15.5009	0.827443		15.5008	0.850228		15.5008	0.837792		15.5008	0.851531		15.5008	0.845786		15.5009	0.851599		15.5009	0.848366		15.5008	0.852962		15.5008	0.849983		15.5009	0.852885		15.5009	0.85091		15.5008	0.851611		15.5008	0.84929		15.5008	0.855202		15.5008	0.853848		15.5009	0.854048
15.5509	0.824732		15.5508	0.853481		15.5508	0.838217		15.5508	0.853116		15.5508	0.845481		15.5509	0.85185		15.5509	0.848092		15.5508	0.849831		15.5508	0.853636		15.5509	0.849882		15.5509	0.852316		15.5508	0.855024		15.5508	0.852754		15.5508	0.855999		15.5508	0.852013		15.5509	0.854533
15.6009	0.828153		15.6008	0.852847		15.6008	0.839658		15.6008	0.853153		15.6008	0.845047		15.6009	0.853408		15.6009	0.844597		15.6008	0.849369		15.6008	0.850888		15.6009	0.851008		15.6009	0.851512		15.6008	0.851779		15.6008	0.852276		15.6008	0.857105		15.6008	0.855155		15.6009	0.850307
15.6509	0.825272		15.6508	0.853507		15.6508	0.835624		15.6508	0.851319		15.6508	0.844852		15.6509	0.852229		15.6509	0.848359		15.6508	0.851944		15.6508	0.849922		15.6509	0.855676		15.6509	0.852024		15.6509	0.852102		15.6508	0.854444		15.6508	0.85515		15.6508	0.852053		15.6509	0.854783
15.7009	0.825992		15.7009	0.851712		15.7008	0.836865		15.7008	0.855124		15.7008	0.846574		15.7009	0.85429		15.7009	0.846409		15.7008	0.854291		15.7008	0.850275		15.7009	0.851561		15.7009	0.849128		15.7009	0.85416		15.7009	0.853204		15.7008	0.856942		15.7008	0.848976		15.7009	0.853902
15.7509	0.825934		15.7509	0.852325		15.7509	0.839669		15.7508	0.851541		15.7508	0.845825		15.7509	0.850625		15.7509	0.846929		15.7508	0.853029		15.7508	0.849098		15.7509	0.852901		15.7509	0.851672		15.7509	0.854107		15.7509	0.852884		15.7508	0.858797		15.7508	0.851425		15.7509	0.854729
15.8009	0.8259		15.8009	0.853574		15.8009	0.836538		15.8008	0.853582		15.8008	0.847453		15.8009	0.853213		15.8009	0.847815		15.8008	0.853401		15.8008	0.850517		15.8009	0.852727		15.8009	0.847585		15.8009	0.85206		15.8009	0.853228		15.8008	0.854184		15.8008	0.850804		15.8009	0.853866
15.8509	0.825463		15.8509	0.853645		15.8509	0.8381		15.8508	0.851576		15.8508	0.843373		15.8509	0.849842		15.8509	0.846217		15.8508	0.850993		15.8508	0.847423		15.8509	0.853305		15.8509	0.848269		15.8509	0.853253		15.8509	0.850767		15.8508	0.855073		15.8508	0.852025		15.8509	0.851739
15.9009	0.826964		15.9009	0.851445		15.9009	0.838331		15.9008	0.855148		15.9008	0.846034		15.9009	0.850139		15.9009	0.849789		15.9008	0.852033		15.9008	0.848859		15.9009	0.853147		15.9009	0.850232		15.9009	0.855649		15.9009	0.851242		15.9008	0.856189		15.9008	0.851837		15.9009	0.854192
15.9509	0.825686		15.9509	0.854495		15.9509	0.839325		15.9508	0.850448		15.9508	0.844122		15.9509	0.853776		15.9509	0.84838		15.9508	0.852155		15.9508	0.845521		15.9509	0.853489		15.9509	0.851182		15.9509	0.853567		15.9509	0.854242		15.9508	0.857103		15.9508	0.853667		15.9509	0.852266
16.0009	0.822939		16.0009	0.853108		16.0009	0.836217		16.0008	0.852582		16.0008	0.846956		16.0009	0.851758		16.0009	0.849149		16.0008	0.849281		16.0008	0.850489		16.0009	0.852162		16.0009	0.849154		16.0009	0.855506		16.0009	0.853191		16.0008	0.853739		16.0008	0.851866		16.0009	0.850298
16.0509	0.829243		16.0509	0.852995		16.0509	0.835594		16.0508	0.849685		16.0508	0.845221		16.0509	0.84998		16.0509	0.849025		16.0509	0.850349		16.0508	0.847664		16.0509	0.852754		16.0509	0.847959		16.0509	0.851657		16.0509	0.850462		16.0508	0.853292		16.0508	0.851854		16.0509	0.851801
16.1009	0.826861		16.1009	0.851698		16.1009	0.837036		16.1008	0.851088		16.1008	0.845326		16.1009	0.851228		16.1009	0.849242		16.1009	0.850729		16.1009	0.846391		16.1009	0.853793		16.1009	0.852361		16.1009	0.85358		16.1009	0.851919		16.1008	0.853213		16.1008	0.853614		16.1009	0.852234
16.1509	0.824348		16.1509	0.851316		16.1509	0.836728		16.1508	0.85052		16.1508	0.843926		16.1509	0.849972		16.1509	0.847793		16.1509	0.849625		16.1509	0.849327		16.1509	0.853318		16.1509	0.849524		16.1509	0.853957		16.1509	0.850264		16.1508	0.854467		16.1508	0.850118		16.1509	0.854288
16.2009	0.825613		16.2009	0.85191		16.2009	0.833227		16.2008	0.851761		16.2008	0.843537		16.2009	0.85189		16.2009	0.843746		16.2009	0.85016		16.2009	0.849422		16.2009	0.85178		16.2009	0.849296		16.2009	0.85268		16.2009	0.85365		16.2008	0.854831		16.2008	0.853365		16.2009	0.849316
16.2509	0.824235		16.2509	0.851667		16.2509	0.837402		16.2508	0.852719		16.2508	0.847554		16.2509	0.85012		16.2509	0.848336		16.2509	0.851878		16.2509	0.848477		16.2509	0.851241		16.2509	0.850779		16.2509	0.851884		16.2509	0.85002		16.2508	0.857148		16.2508	0.853801		16.2509	0.850637
16.3009	0.823674		16.3009	0.850878		16.3009	0.833654		16.3008	0.851148		16.3008	0.843185		16.3009	0.851419		16.3009	0.847184		16.3009	0.852134		16.3009	0.849285		16.3009	0.853389		16.3009	0.848787		16.3009	0.850403		16.3009	0.852212		16.3008	0.851191		16.3008	0.852515		16.3009	0.851624
16.3509	0.824056		16.3509	0.851312		16.3509	0.837889		16.3508	0.848418		16.3508	0.848079		16.3509	0.852608		16.3509	0.848555		16.3509	0.851015		16.3509	0.851299		16.3509	0.852517		16.3509	0.84745		16.3509	0.851484		16.3509	0.85317		16.3509	0.85016		16.3508	0.852074		16.3509	0.851502
16.4009	0.823954		16.4009	0.853221		16.4009	0.839593		16.4008	0.850914		16.4008	0.844381		16.4009	0.85239		16.4009	0.850636		16.4009	0.851137		16.4009	0.845917		16.4009	0.851883		16.4009	0.847799		16.4009	0.854979		16.4009	0.851922		16.4009	0.852675		16.4009	0.852635		16.4009	0.852978
16.4509	0.824559		16.4509	0.849169		16.4509	0.834464		16.4509	0.850436		16.4508	0.845908		16.4509	0.851461		16.4509	0.843472		16.4509	0.851212		16.4509	0.848644		16.4509	0.850495		16.4509	0.848473		16.4509	0.852835		16.4509	0.849669		16.4509	0.850848		16.4509	0.853583		16.4509	0.8485
16.5009	0.825844		16.5009	0.854298		16.5009	0.837198		16.5009	0.853285		16.5009	0.843893		16.5009	0.852256		16.5009	0.850151		16.5009	0.853418		16.5009	0.849722		16.5009	0.85139		16.5009	0.849593		16.5009	0.853095		16.5009	0.849363		16.5009	0.853782		16.5009	0.849706		16.5009	0.8524
16.5509	0.825989		16.5509	0.85008		16.5509	0.837007		16.5509	0.850645		16.5509	0.842413		16.5509	0.850525		16.5509	0.846405		16.5509	0.852834		16.5509	0.848056		16.5509	0.852435		16.5509	0.847626		16.5509	0.852936		16.5509	0.851137		16.5509	0.852323		16.5509	0.850607		16.5509	0.851878
16.6009	0.82466		16.6009	0.851841		16.6009	0.837002		16.6009	0.849995		16.6009	0.844286		16.6009	0.850753		16.6009	0.846785		16.6009	0.852014		16.6009	0.845795		16.6009	0.852383		16.6009	0.848733		16.6009	0.852054		16.6009	0.852626		16.6009	0.855486		16.6009	0.853132		16.6009	0.853094
16.6509	0.825646		16.6509	0.850038		16.6509	0.83871		16.6509	0.849952		16.6509	0.845238		16.6509	0.848132		16.6509	0.84657		16.6509	0.853365		16.6509	0.849042		16.6509	0.855106		16.6509	0.849399		16.6509	0.854668		16.6509	0.849468		16.6509	0.855259		16.6509	0.851747		16.6509	0.852219
16.7009	0.825598		16.7009	0.851485		16.7009	0.836566		16.7009	0.851908		16.7009	0.844726		16.7009	0.848691		16.7009	0.843202		16.7009	0.850521		16.7009	0.847273		16.7009	0.8492		16.7009	0.84942		16.7009	0.850971		16.7009	0.850662		16.7009	0.854148		16.7009	0.848681		16.7009	0.849877
16.7509	0.824922		16.7509	0.851868		16.7509	0.839283		16.7509	0.85177		16.7509	0.845681		16.7509	0.848687		16.7509	0.845887		16.7509	0.849259		16.7509	0.845903		16.751	0.8508		16.7509	0.84757		16.7509	0.849792		16.7509	0.853197		16.7509	0.854313		16.7509	0.852053		16.7509	0.85025
16.8009	0.825234		16.8009	0.850748		16.8009	0.835799		16.8009	0.851519		16.8009	0.845253		16.8009	0.852251		16.8009	0.847267		16.8009	0.848018		16.8009	0.845833		16.801	0.852042		16.801	0.850651		16.8009	0.85296		16.8009	0.850146		16.8009	0.850553		16.8009	0.849372		16.8009	0.85094
16.8509	0.823554		16.8509	0.849853		16.8509	0.838264		16.8509	0.848959		16.8509	0.845221		16.8509	0.85247		16.8509	0.844552		16.8509	0.849525		16.8509	0.845833		16.851	0.852536		16.851	0.847759		16.8509	0.854419		16.8509	0.85155		16.8509	0.853687		16.8509	0.849996		16.8509	0.853833
16.901	0.826226		16.9009	0.85046		16.9009	0.837693		16.9009	0.848719		16.9009	0.845644		16.9009	0.850491		16.9009	0.845711		16.9009	0.850849		16.9009	0.846717		16.901	0.852865		16.901	0.850027		16.9009	0.851785		16.9009	0.851152		16.9009	0.852076		16.9009	0.850512		16.9009	0.849706
16.951	0.824645		16.9509	0.852823		16.9509	0.834676		16.9509	0.850007		16.9509	0.843832		16.9509	0.851279		16.9509	0.84393		16.9509	0.852564		16.9509	0.846541		16.951	0.850092		16.951	0.848827		16.9509	0.852449		16.9509	0.851208		16.9509	0.856541		16.9509	0.853325		16.9509	0.855128
17.001	0.824254		17.0009	0.850262		17.0009	0.838186		17.0009	0.850856		17.0009	0.844276		17.0009	0.850678		17.0009	0.84558		17.0009	0.848234		17.0009	0.849263		17.001	0.85079		17.001	0.850374		17.0009	0.85079		17.0009	0.851018		17.0009	0.854633		17.0009	0.851554		17.0009	0.853819
17.051	0.823584		17.0509	0.850139		17.0509	0.840374		17.0509	0.850747		17.0509	0.845399		17.0509	0.849661		17.0509	0.847463		17.0509	0.851649		17.0509	0.846663		17.051	0.853644		17.051	0.848628		17.0509	0.85346		17.0509	0.852667		17.0509	0.85417		17.0509	0.851088		17.051	0.850791
17.101	0.82589		17.1009	0.8531		17.1009	0.834812		17.1009	0.852461		17.1009	0.846122		17.1009	0.852496		17.1009	0.845576		17.1009	0.850149		17.1009	0.847621		17.101	0.852102		17.101	0.849074		17.1009	0.851408		17.1009	0.853892		17.1009	0.852746		17.1009	0.850129		17.101	0.84922
17.151	0.824438		17.1509	0.849241		17.1509	0.837115		17.1509	0.850112		17.1509	0.844561		17.151	0.849996		17.1509	0.846433		17.1509	0.84947		17.1509	0.849567		17.151	0.849928		17.151	0.851654		17.1509	0.85086		17.1509	0.851193		17.1509	0.852091		17.1509	0.851742		17.151	0.850867
17.201	0.823175		17.2009	0.851908		17.2009	0.834233		17.2009	0.852776		17.2009	0.842372		17.201	0.851219		17.201	0.845176		17.2009	0.848895		17.2009	0.848125		17.201	0.850829		17.201	0.846665		17.2009	0.850033		17.2009	0.852663		17.2009	0.853872		17.2009	0.852918		17.201	0.852689
17.251	0.824894		17.2509	0.848857		17.2509	0.8363		17.2509	0.851642		17.2509	0.844583		17.251	0.850007		17.251	0.845268		17.2509	0.852987		17.2509	0.848131		17.251	0.852055		17.251	0.84795		17.2509	0.851829		17.2509	0.850846		17.2509	0.8536		17.2509	0.847746		17.251	0.852051
17.301	0.8249		17.3009	0.850641		17.3009	0.836587		17.3009	0.849857		17.3009	0.842428		17.301	0.852507		17.301	0.846037		17.3009	0.847959		17.3009	0.843962		17.301	0.851367		17.301	0.850573		17.3009	0.850172		17.3009	0.847937		17.3009	0.854723		17.3009	0.850913		17.301	0.851989
17.351	0.822897		17.3509	0.851479		17.3509	0.836753		17.3509	0.852655		17.3509	0.843685		17.351	0.851273		17.351	0.845531		17.3509	0.85065		17.3509	0.848026		17.351	0.851074		17.351	0.84781		17.3509	0.854345		17.3509	0.851878		17.3509	0.855082		17.3509	0.850795		17.351	0.852366
17.401	0.823918		17.4009	0.852386		17.4009	0.837167		17.4009	0.849275		17.4009	0.842422		17.401	0.850382		17.401	0.847862		17.4009	0.850098		17.4009	0.849192		17.401	0.852102		17.401	0.851132		17.4009	0.851618		17.4009	0.848598		17.4009	0.851412		17.4009	0.849321		17.401	0.850515
17.451	0.825045		17.4509	0.850624		17.4509	0.836177		17.4509	0.851304		17.4509	0.842357		17.451	0.850857		17.451	0.843372		17.4509	0.85103		17.4509	0.84501		17.451	0.84861		17.451	0.847219		17.4509	0.8493		17.4509	0.84857		17.4509	0.853326		17.4509	0.849443		17.451	0.850778
17.501	0.822199		17.5009	0.847858		17.5009	0.837306		17.5009	0.850598		17.5009	0.844995		17.501	0.848236		17.501	0.847132		17.5009	0.850266		17.5009	0.847832		17.501	0.850877		17.501	0.849442		17.501	0.852465		17.501	0.852302		17.5009	0.853026		17.5009	0.850772		17.501	0.850544
17.551	0.823675		17.551	0.850242		17.5509	0.836855		17.5509	0.851101		17.5509	0.844311		17.551	0.85065		17.551	0.84375		17.5509	0.848333		17.5509	0.848851		17.551	0.851671		17.551	0.84944		17.551	0.848652		17.551	0.849933		17.5509	0.856064		17.5509	0.850873		17.551	0.848449
17.601	0.823496		17.601	0.847123		17.601	0.835982		17.6009	0.847723		17.6009	0.845259		17.601	0.850624		17.601	0.845083		17.6009	0.850405		17.6009	0.844423		17.601	0.850382		17.601	0.850073		17.601	0.851448		17.601	0.850238		17.6009	0.852279		17.6009	0.850404		17.601	0.850513
17.651	0.825241		17.651	0.851264		17.651	0.834266		17.6509	0.849597		17.6509	0.840728		17.651	0.848976		17.651	0.843669		17.6509	0.849128		17.6509	0.846675		17.651	0.851626		17.651	0.848853		17.651	0.851166		17.651	0.850538		17.6509	0.852205		17.6509	0.849643		17.651	0.852223
17.701	0.822016		17.701	0.848198		17.701	0.836187		17.7009	0.851991		17.7009	0.844324		17.701	0.849613		17.701	0.845659		17.7009	0.849286		17.7009	0.847004		17.701	0.850859		17.701	0.849263		17.701	0.850971		17.701	0.84765		17.7009	0.852149		17.7009	0.848239		17.701	0.852593
17.751	0.824482		17.751	0.851223		17.751	0.835274		17.7509	0.848248		17.7509	0.84165		17.751	0.849876		17.751	0.847169		17.7509	0.851806		17.7509	0.849581		17.751	0.847305		17.751	0.848596		17.751	0.849821		17.751	0.847668		17.7509	0.854457		17.7509	0.850769		17.751	0.850749
17.801	0.823061		17.801	0.853277		17.801	0.835302		17.8009	0.849947		17.8009	0.844575		17.801	0.849777		17.801	0.843641		17.8009	0.847211		17.8009	0.845468		17.801	0.852081		17.801	0.849507		17.801	0.852319		17.801	0.85016		17.8009	0.854536		17.8009	0.850258		17.801	0.85067
17.851	0.82298		17.851	0.849215		17.851	0.836278		17.8509	0.849269		17.8509	0.841485		17.851	0.847837		17.851	0.844808		17.8509	0.849478		17.8509	0.848208		17.851	0.849877		17.851	0.84907		17.851	0.850623		17.851	0.852204		17.8509	0.853319		17.8509	0.848972		17.851	0.851311
17.901	0.8234		17.901	0.848404		17.901	0.836818		17.9009	0.848992		17.9009	0.838896		17.901	0.848323		17.901	0.845676		17.901	0.847626		17.901	0.8439		17.901	0.850197		17.901	0.848647		17.901	0.8506		17.901	0.8506		17.9009	0.852945		17.9009	0.850419		17.901	0.851433
17.951	0.822677		17.951	0.851609		17.951	0.833236		17.9509	0.852202		17.9509	0.844106		17.951	0.8494		17.951	0.846157		17.951	0.850324		17.951	0.846051		17.951	0.849634		17.951	0.847922		17.951	0.85056		17.951	0.850872		17.9509	0.854156		17.9509	0.847212		17.951	0.850728
18.001	0.823052		18.001	0.850645		18.001	0.835902		18.0009	0.848988		18.0009	0.841649		18.001	0.851513		18.001	0.845257		18.001	0.850071		18.001	0.846453		18.001	0.848411		18.001	0.848989		18.001	0.852309		18.001	0.85032		18.0009	0.849292		18.0009	0.850557		18.001	0.850203
18.051	0.822827		18.051	0.849953		18.051	0.835394		18.0509	0.849444		18.0509	0.842862		18.051	0.848386		18.051	0.844297		18.051	0.848716		18.051	0.84859		18.051	0.8514		18.051	0.847584		18.051	0.847816		18.051	0.852466		18.0509	0.851787		18.0509	0.850196		18.051	0.852043
18.101	0.824431		18.101	0.849846		18.101	0.836109		18.1009	0.85067		18.1009	0.842993		18.101	0.851167		18.101	0.846257		18.101	0.847298		18.101	0.847055		18.101	0.850231		18.101	0.848362		18.101	0.851873		18.101	0.848728		18.1009	0.852896		18.1009	0.850355		18.101	0.850772
18.151	0.821973		18.151	0.847583		18.151	0.835718		18.1509	0.849491		18.1509	0.843984		18.151	0.85033		18.151	0.84487		18.151	0.850037		18.151	0.846483		18.151	0.848926		18.151	0.850689		18.151	0.85254		18.151	0.850553		18.151	0.85345		18.1509	0.849685		18.151	0.847592
18.201	0.820955		18.201	0.850287		18.201	0.83408		18.2009	0.851049		18.2009	0.839733		18.201	0.849837		18.201	0.845303		18.201	0.851487		18.201	0.846211		18.201	0.851272		18.201	0.848321		18.201	0.850375		18.201	0.846719		18.201	0.851007		18.201	0.849906		18.201	0.848516
18.251	0.824113		18.251	0.849635		18.251	0.835698		18.251	0.845903		18.2509	0.84138		18.251	0.849153		18.251	0.846309		18.251	0.847195		18.251	0.841803		18.251	0.850258		18.251	0.848888		18.251	0.849264		18.251	0.849851		18.251	0.850631		18.251	0.84958		18.251	0.849968
18.301	0.822303		18.301	0.849838		18.301	0.837479		18.301	0.848367		18.301	0.843157		18.301	0.849621		18.301	0.844133		18.301	0.849459		18.301	0.845627		18.301	0.848814		18.301	0.849445		18.301	0.850331		18.301	0.847906		18.301	0.85008		18.301	0.85057		18.301	0.851145
18.351	0.82314		18.351	0.849277		18.351	0.835341		18.351	0.847062		18.351	0.841007		18.351	0.85163		18.351	0.846203		18.351	0.851185		18.351	0.845731		18.351	0.850181		18.351	0.848084		18.351	0.85085		18.351	0.848816		18.351	0.852845		18.351	0.850375		18.351	0.849708
18.401	0.82365		18.401	0.852493		18.401	0.833163		18.401	0.848893		18.401	0.841366		18.401	0.850692		18.401	0.842742		18.401	0.848564		18.401	0.84691		18.401	0.847972		18.401	0.845069		18.401	0.851747		18.401	0.846766		18.401	0.851678		18.401	0.849727		18.401	0.850643
18.451	0.822572		18.451	0.850901		18.451	0.836153		18.451	0.84513		18.451	0.841422		18.451	0.848596		18.451	0.844505		18.451	0.850233		18.451	0.847183		18.451	0.849016		18.451	0.848275		18.451	0.853776		18.451	0.850224		18.451	0.854201		18.451	0.848669		18.451	0.849792
18.501	0.823737		18.501	0.850363		18.501	0.836785		18.501	0.850963		18.501	0.841153		18.501	0.849993		18.501	0.844743		18.501	0.849545		18.501	0.849232		18.501	0.847368		18.501	0.847799		18.501	0.849723		18.501	0.851647		18.501	0.850812		18.501	0.849459		18.501	0.849741
18.551	0.822729		18.551	0.84883		18.551	0.8368		18.551	0.852251		18.551	0.84581		18.551	0.848575		18.551	0.840869		18.551	0.851312		18.551	0.846355		18.551	0.847927		18.551	0.84773		18.551	0.849446		18.551	0.846764		18.551	0.850661		18.551	0.850497		18.551	0.848592
18.601	0.822373		18.601	0.848228		18.601	0.834588		18.601	0.847451		18.601	0.841154		18.601	0.849499		18.601	0.844897		18.601	0.848433		18.601	0.846217		18.6011	0.847182		18.6011	0.851473		18.601	0.848705		18.601	0.849275		18.601	0.849471		18.601	0.847776		18.601	0.852442
18.651	0.82115		18.651	0.848472		18.651	0.834421		18.651	0.848283		18.651	0.840506		18.651	0.848708		18.651	0.843562		18.651	0.848969		18.651	0.84403		18.6511	0.847246		18.6511	0.849294		18.651	0.850671		18.651	0.847589		18.651	0.850384		18.651	0.851305		18.651	0.851109
18.7011	0.823349		18.701	0.849071		18.701	0.833518		18.701	0.847225		18.701	0.84104		18.701	0.847954		18.701	0.843489		18.701	0.848059		18.701	0.84572		18.7011	0.850805		18.7011	0.848562		18.701	0.84933		18.701	0.849845		18.701	0.851674		18.701	0.849899		18.701	0.849536
18.7511	0.821348		18.751	0.850971		18.751	0.835034		18.751	0.850556		18.751	0.840081		18.751	0.849374		18.751	0.842499		18.751	0.848465		18.751	0.844379		18.7511	0.852236		18.7511	0.845663		18.751	0.852148		18.751	0.850076		18.751	0.851027		18.751	0.850388		18.751	0.850162
18.8011	0.823801		18.801	0.851562		18.801	0.834401		18.801	0.849763		18.801	0.843787		18.801	0.850079		18.801	0.843424		18.801	0.850676		18.801	0.84396		18.8011	0.850172		18.8011	0.846661		18.801	0.851648		18.801	0.845679		18.801	0.851918		18.801	0.846992		18.801	0.850976
18.8511	0.820877		18.851	0.848492		18.851	0.834212		18.851	0.846872		18.851	0.841789		18.851	0.848343		18.851	0.845766		18.851	0.851522		18.851	0.845629		18.8511	0.850596		18.8511	0.84412		18.851	0.851525		18.851	0.850895		18.851	0.853519		18.851	0.847369		18.8511	0.852105
18.9011	0.820269		18.901	0.848818		18.901	0.835326		18.901	0.849188		18.901	0.845871		18.901	0.849262		18.901	0.843517		18.901	0.85032		18.901	0.845416		18.9011	0.849641		18.9011	0.845901		18.901	0.85141		18.901	0.848269		18.901	0.853334		18.901	0.848962		18.9011	0.851011
18.9511	0.823679		18.951	0.850075		18.951	0.833967		18.951	0.851595		18.951	0.845653		18.951	0.845787		18.951	0.844301		18.951	0.84912		18.951	0.84378		18.9511	0.848018		18.9511	0.848078		18.951	0.849033		18.951	0.849447		18.951	0.850605		18.951	0.847845		18.9511	0.848946
19.0011	0.821007		19.001	0.849855		19.001	0.83447		19.001	0.85051		19.001	0.842399		19.0011	0.848726		19.001	0.844939		19.001	0.847393		19.001	0.846433		19.0011	0.849943		19.0011	0.846316		19.001	0.848713		19.001	0.847266		19.001	0.850727		19.001	0.850086		19.0011	0.850873
19.0511	0.821239		19.051	0.848569		19.051	0.835245		19.051	0.846052		19.051	0.845298		19.0511	0.847709		19.0511	0.843838		19.051	0.848001		19.051	0.845401		19.0511	0.849133		19.0511	0.851138		19.051	0.850888		19.051	0.849337		19.051	0.852046		19.051	0.849414		19.0511	0.848593
19.1011	0.822264		19.101	0.84608		19.101	0.834769		19.101	0.849981		19.101	0.84264		19.1011	0.850349		19.1011	0.845678		19.101	0.848284		19.101	0.843664		19.1011	0.850911		19.1011	0.845089		19.101	0.851366		19.101	0.848121		19.101	0.854112		19.101	0.849191		19.1011	0.850654
19.1511	0.821723		19.151	0.848603		19.151	0.836941		19.151	0.848739		19.151	0.838138		19.1511	0.850043		19.1511	0.847277		19.151	0.848054		19.151	0.842666		19.1511	0.849124		19.1511	0.849074		19.151	0.849027		19.151	0.84988		19.151	0.852877		19.151	0.847682		19.1511	0.850843
19.2011	0.822568		19.201	0.850461		19.201	0.834815		19.201	0.849507		19.201	0.842234		19.2011	0.849734		19.2011	0.843624		19.201	0.847695		19.201	0.844056		19.2011	0.849005		19.2011	0.84964		19.201	0.84875		19.201	0.851395		19.201	0.848609		19.201	0.849953		19.2011	0.850646
19.2511	0.824248		19.251	0.850138		19.251	0.834693		19.251	0.849657		19.251	0.840819		19.2511	0.848967		19.2511	0.844389		19.251	0.847041		19.251	0.845661		19.2511	0.849499		19.2511	0.847227		19.251	0.849087		19.251	0.849176		19.251	0.852581		19.251	0.849762		19.2511	0.848647
19.3011	0.820838		19.301	0.848182		19.301	0.833498		19.301	0.848437		19.301	0.840036		19.3011	0.847888		19.3011	0.842568		19.301	0.847637		19.301	0.846477		19.3011	0.851563		19.3011	0.844947		19.3011	0.850886		19.301	0.849476		19.301	0.853044		19.301	0.848226		19.3011	0.850431
19.3511	0.823712		19.3511	0.847408		19.351	0.833243		19.351	0.84694		19.351	0.84271		19.3511	0.847647		19.3511	0.843253		19.351	0.84934		19.351	0.846817		19.3511	0.848224		19.3511	0.847024		19.3511	0.850418		19.3511	0.844964		19.351	0.850455		19.351	0.848629		19.3511	0.850272
19.4011	0.820073		19.4011	0.848793		19.4011	0.833942		19.401	0.845987		19.401	0.841962		19.4011	0.848239		19.4011	0.84314		19.401	0.848837		19.401	0.843182		19.4011	0.850172		19.4011	0.845988		19.4011	0.85279		19.4011	0.846043		19.401	0.851054		19.401	0.847032		19.4011	0.851043
19.4511	0.821821		19.4511	0.847706		19.4511	0.835987		19.451	0.848006		19.451	0.842199		19.4511	0.847886		19.4511	0.846051		19.451	0.849314		19.451	0.845503		19.4511	0.849636		19.4511	0.84596		19.4511	0.847975		19.4511	0.847746		19.451	0.851994		19.451	0.846331		19.4511	0.849913
19.5011	0.82189		19.5011	0.848591		19.5011	0.837258		19.501	0.846952		19.501	0.842816		19.5011	0.8493		19.5011	0.844335		19.501	0.84676		19.501	0.84472		19.5011	0.848465		19.5011	0.843569		19.5011	0.846433		19.5011	0.848606		19.501	0.850526		19.501	0.850868		19.5011	0.850921
19.5511	0.822286		19.5511	0.84804		19.5511	0.832622		19.551	0.848419		19.551	0.841799		19.5511	0.84899		19.5511	0.845478		19.551	0.847305		19.551	0.846132		19.5511	0.850383		19.5511	0.84786		19.5511	0.849439		19.5511	0.850192		19.551	0.850186		19.551	0.846863		19.5511	0.850019
19.6011	0.821771		19.6011	0.848892		19.6011	0.83256		19.601	0.849317		19.601	0.842055		19.6011	0.848794		19.6011	0.842982		19.601	0.849983		19.601	0.844071		19.6011	0.84893		19.6011	0.84739		19.6011	0.847365		19.6011	0.845825		19.601	0.854402		19.601	0.846243		19.6011	0.848436
19.6511	0.821687		19.6511	0.84793		19.6511	0.833182		19.651	0.849263		19.651	0.840197		19.6511	0.847678		19.6511	0.843547		19.651	0.847581		19.651	0.84254		19.6511	0.849833		19.6511	0.848164		19.6511	0.850568		19.6511	0.847386		19.651	0.853407		19.651	0.849638		19.6511	0.849732
19.7011	0.821778		19.7011	0.848797		19.7011	0.834073		19.701	0.846312		19.701	0.841145		19.7011	0.849054		19.7011	0.840887		19.7011	0.847208		19.701	0.846349		19.7011	0.84668		19.7011	0.848549		19.7011	0.849848		19.7011	0.848023		19.701	0.851725		19.701	0.852146		19.7011	0.849305
19.7511	0.823589		19.7511	0.8459		19.7511	0.838309		19.751	0.849552		19.751	0.84291		19.7511	0.84776		19.7511	0.842035		19.7511	0.847301		19.7511	0.846064		19.7511	0.849846		19.7511	0.84897		19.7511	0.851205		19.7511	0.848266		19.751	0.851499		19.751	0.849666		19.7511	0.84963
19.8011	0.822223		19.8011	0.849814		19.8011	0.836889		19.801	0.850301		19.801	0.840186		19.8011	0.84576		19.8011	0.843545		19.8011	0.84698		19.8011	0.8449		19.8011	0.846654		19.8011	0.847451		19.8011	0.851939		19.8011	0.847487		19.801	0.850895		19.801	0.847088		19.8011	0.846916
19.8511	0.823139		19.8511	0.846863		19.8511	0.832974		19.851	0.846801		19.851	0.843452		19.8511	0.846938		19.8511	0.842743		19.8511	0.848032		19.8511	0.844521		19.8511	0.847366		19.8511	0.847675		19.8511	0.851263		19.8511	0.846858		19.851	0.850527		19.851	0.850506		19.8511	0.848092
19.9011	0.823866		19.9011	0.848921		19.9011	0.832108		19.901	0.850409		19.901	0.840765		19.9011	0.850241		19.9011	0.843267		19.9011	0.847395		19.9011	0.847352		19.9011	0.847538		19.9011	0.848898		19.9011	0.849596		19.9011	0.84767		19.901	0.85009		19.901	0.851036		19.9011	0.847637
19.9511	0.82059		19.9511	0.849259		19.9511	0.83135		19.951	0.847846		19.951	0.842778		19.9511	0.846886		19.9511	0.841936		19.9511	0.848873		19.9511	0.845742		19.9511	0.847915		19.9511	0.845804		19.9511	0.849141		19.9511	0.847442		19.951	0.850361		19.951	0.848673		19.9511	0.849726
20.0011	0.822092		20.0011	0.846911		20.0011	0.834531		20.001	0.849211		20.001	0.842728		20.0011	0.848062		20.0011	0.842713		20.0011	0.849268		20.0011	0.843265		20.0011	0.849087		20.0011	0.845173		20.0011	0.85287		20.0011	0.847039		20.0011	0.850332		20.001	0.848624		20.0011	0.848825
20.0511	0.820754		20.0511	0.846265		20.0511	0.833792		20.051	0.849417		20.051	0.842036		20.0511	0.84691		20.0511	0.843802		20.0511	0.848332		20.0511	0.845169		20.0511	0.845681		20.0511	0.846176		20.0511	0.851286		20.0511	0.849028		20.0511	0.851401		20.0511	0.84749		20.0511	0.849431
20.1011	0.820222		20.1011	0.846965		20.1011	0.834082		20.1011	0.848292		20.101	0.842072		20.1011	0.847982		20.1011	0.843478		20.1011	0.849623		20.1011	0.8469		20.1011	0.845474		20.1011	0.845982		20.1011	0.848901		20.1011	0.847216		20.1011	0.851994		20.1011	0.84772		20.1011	0.84988
20.1511	0.822049		20.1511	0.848452		20.1511	0.832717		20.1511	0.846684		20.1511	0.840513		20.1511	0.851492		20.1511	0.841134		20.1511	0.850717		20.1511	0.842895		20.1511	0.848327		20.1511	0.846449		20.1511	0.849096		20.1511	0.846804		20.1511	0.851572		20.1511	0.845109		20.1511	0.848356
20.2011	0.820266		20.2011	0.849548		20.2011	0.834761		20.2011	0.848501		20.2011	0.841226		20.2011	0.84955		20.2011	0.842449		20.2011	0.847925		20.2011	0.84153		20.2011	0.849754		20.2011	0.846485		20.2011	0.847352		20.2011	0.846689		20.2011	0.851314		20.2011	0.847751		20.2011	0.849428
20.2511	0.821654		20.2511	0.849219		20.2511	0.835155		20.2511	0.84892		20.2511	0.84165		20.2511	0.851204		20.2511	0.84435		20.2511	0.849272		20.2511	0.84376		20.2511	0.848338		20.2511	0.845256		20.2511	0.848297		20.2511	0.849305		20.2511	0.849927		20.2511	0.846943		20.2511	0.85038
20.3011	0.822508		20.3011	0.846297		20.3011	0.830964		20.3011	0.848225		20.3011	0.839061		20.3011	0.849193		20.3011	0.84476		20.3011	0.849006		20.3011	0.845471		20.3011	0.849151		20.3011	0.845946		20.3011	0.848296		20.3011	0.850086		20.3011	0.849094		20.3011	0.844745		20.3011	0.846504
20.3511	0.820181		20.3511	0.847966		20.3511	0.834544		20.3511	0.84935		20.3511	0.840516		20.3511	0.849326		20.3511	0.844718		20.3511	0.847453		20.3511	0.841754		20.3511	0.84842		20.3511	0.846304		20.3511	0.849405		20.3511	0.845349		20.3511	0.851768		20.3511	0.847014		20.3511	0.851333
20.4011	0.819034		20.4011	0.845993		20.4011	0.834023		20.4011	0.847844		20.4011	0.839837		20.4011	0.844131		20.4011	0.842441		20.4011	0.846907		20.4011	0.845626		20.4012	0.847916		20.4011	0.847499		20.4011	0.848475		20.4011	0.848785		20.4011	0.848472		20.4011	0.848069		20.4011	0.850311
20.4511	0.820722		20.4511	0.845938		20.4511	0.833196		20.4511	0.847266		20.4511	0.839801		20.4511	0.844614		20.4511	0.842518		20.4511	0.847494		20.4511	0.845309		20.4512	0.847044		20.4512	0.844919		20.4511	0.846979		20.4511	0.846985		20.4511	0.851886		20.4511	0.848265		20.4511	0.847946
20.5011	0.822725		20.5011	0.847865		20.5011	0.832651		20.5011	0.850077		20.5011	0.839608		20.5011	0.847606		20.5011	0.844202		20.5011	0.845192		20.5011	0.842683		20.5012	0.849041		20.5012	0.846675		20.5011	0.850523		20.5011	0.846433		20.5011	0.851702		20.5011	0.847417		20.5011	0.851024
20.5512	0.820845		20.5511	0.847486		20.5511	0.833737		20.5511	0.846444		20.5511	0.840548		20.5511	0.847455		20.5511	0.842208		20.5511	0.847083		20.5511	0.846441		20.5512	0.847103		20.5512	0.848291		20.5511	0.850203		20.5511	0.848285		20.5511	0.851165		20.5511	0.847691		20.5511	0.848064
20.6012	0.819203		20.6011	0.847626		20.6011	0.834754		20.6011	0.850367		20.6011	0.841766		20.6011	0.846633		20.6011	0.843723		20.6011	0.850209		20.6011	0.845644		20.6012	0.847292		20.6012	0.847837		20.6011	0.847913		20.6011	0.84954		20.6011	0.851009		20.6011	0.848983		20.6011	0.849151
20.6512	0.82265		20.6511	0.850116		20.6511	0.831015		20.6511	0.84835		20.6511	0.837696		20.6511	0.847878		20.6511	0.844294		20.6511	0.84468		20.6511	0.844464		20.6512	0.849942		20.6512	0.847919		20.6511	0.849624		20.6511	0.849149		20.6511	0.851846		20.6511	0.847139		20.6511	0.850084
20.7012	0.82013		20.7011	0.847675		20.7011	0.832993		20.7011	0.848152		20.7011	0.841186		20.7011	0.849653		20.7011	0.844228		20.7011	0.845784		20.7011	0.84476		20.7012	0.848451		20.7012	0.846921		20.7011	0.849666		20.7011	0.851128		20.7011	0.848994		20.7011	0.847208		20.7012	0.849344
20.7512	0.821059		20.7511	0.848865		20.7511	0.83426		20.7511	0.850894		20.7511	0.839598		20.7511	0.850609		20.7511	0.8412		20.7511	0.848516		20.7511	0.843498		20.7512	0.84861		20.7512	0.843435		20.7511	0.848131		20.7511	0.849881		20.7511	0.8524		20.7511	0.846717		20.7512	0.847659
20.8012	0.821823		20.8011	0.84796		20.8011	0.833354		20.8011	0.844256		20.8011	0.838783		20.8012	0.845554		20.8011	0.842813		20.8011	0.847973		20.8011	0.845283		20.8012	0.847276		20.8012	0.845012		20.8011	0.85003		20.8011	0.845313		20.8011	0.850792		20.8011	0.846988		20.8012	0.849732
20.8512	0.824082		20.8511	0.849652		20.8511	0.834744		20.8511	0.846511		20.8511	0.840076		20.8512	0.848112		20.8512	0.84225		20.8511	0.849596		20.8511	0.843703		20.8512	0.847407		20.8512	0.845302		20.8511	0.847487		20.8511	0.846841		20.8511	0.849198		20.8511	0.845433		20.8512	0.847943
20.9012	0.820394		20.9011	0.849708		20.9011	0.833425		20.9011	0.850911		20.9011	0.838971		20.9012	0.846716		20.9012	0.843823		20.9011	0.846177		20.9011	0.842299		20.9012	0.849406		20.9012	0.845101		20.9011	0.847352		20.9011	0.846461		20.9011	0.851122		20.9011	0.847895		20.9012	0.849176
20.9512	0.819389		20.9511	0.846112		20.9511	0.832123		20.9511	0.84799		20.9511	0.841589		20.9512	0.849255		20.9512	0.842854		20.9511	0.847949		20.9511	0.846472		20.9512	0.845617		20.9512	0.843748		20.9511	0.849963		20.9511	0.846354		20.9511	0.849414		20.9511	0.848162		20.9512	0.846775
21.0012	0.822086		21.0011	0.848822		21.0011	0.832352		21.0011	0.849121		21.0011	0.843633		21.0012	0.849389		21.0012	0.843202		21.0011	0.847871		21.0011	0.846214		21.0012	0.848114		21.0012	0.846223		21.0012	0.849657		21.0012	0.84619		21.0011	0.849801		21.0011	0.848191		21.0012	0.848264
21.0512	0.827618		21.0511	0.853814		21.0511	0.839303		21.0511	0.855189		21.0511	0.848167		21.0512	0.85682		21.0512	0.851479		21.0511	0.854753		21.0511	0.852567		21.0512	0.851577		21.0512	0.850378		21.0511	0.852725		21.0511	0.855248		21.0511	0.855523		21.0511	0.854561		21.0512	0.856338
21.1012	0.838246		21.1011	0.86404		21.1011	0.854886		21.1011	0.864732		21.1011	0.859053		21.1012	0.864253		21.1012	0.861969		21.1011	0.865172		21.1011	0.861262		21.1012	0.865942		21.1012	0.863296		21.1012	0.866171		21.1011	0.866886		21.1011	0.867699		21.1011	0.864931		21.1012	0.863226
21.1512	0.847457		21.1511	0.871501		21.1511	0.858309		21.1511	0.870272		21.1511	0.865438		21.1512	0.872168		21.1512	0.867166		21.1511	0.870762		21.1511	0.86604		21.1512	0.870898		21.1512	0.869082		21.1512	0.874087		21.1512	0.873062		21.1511	0.875869		21.1511	0.870106		21.1512	0.871504
21.2012	0.851714		21.2012	0.875849		21.2011	0.862557		21.2011	0.873319		21.2011	0.867513		21.2012	0.874906		21.2012	0.869282		21.2011	0.876757		21.2011	0.87262		21.2012	0.877307		21.2012	0.873574		21.2012	0.878383		21.2012	0.874173		21.2011	0.877856		21.2011	0.876001		21.2012	0.875389
21.2512	0.851965		21.2512	0.881477		21.2512	0.867638		21.2511	0.877723		21.2511	0.874482		21.2512	0.878067		21.2512	0.872591		21.2511	0.877224		21.2511	0.87695		21.2512	0.876223		21.2512	0.875725		21.2512	0.880631		21.2512	0.878895		21.2511	0.881102		21.2511	0.879257		21.2512	0.878537
21.3012	0.857477		21.3012	0.882862		21.3012	0.868881		21.3011	0.881432		21.3011	0.87601		21.3012	0.880969		21.3012	0.87763		21.3011	0.882027		21.3011	0.879256		21.3012	0.880453		21.3012	0.881847		21.3012	0.881663		21.3012	0.884121		21.3011	0.885933		21.3011	0.878545		21.3012	0.883212
21.3512	0.85881		21.3512	0.884541		21.3512	0.872878		21.3511	0.885714		21.3511	0.879332		21.3512	0.887383		21.3512	0.882306		21.3511	0.886587		21.3511	0.878895		21.3512	0.885775		21.3512	0.883071		21.3512	0.884884		21.3512	0.884241		21.3511	0.885264		21.3511	0.884915		21.3512	0.884177
21.4012	0.862772		21.4012	0.884949		21.4012	0.874866		21.4011	0.888082		21.4011	0.880919		21.4012	0.885927		21.4012	0.882164		21.4011	0.884157		21.4011	0.883766		21.4012	0.888016		21.4012	0.88407		21.4012	0.887025		21.4012	0.886809		21.4011	0.886626		21.4011	0.887839		21.4012	0.887655
21.4512	0.864714		21.4512	0.886834		21.4512	0.875339		21.4511	0.888945		21.4511	0.88184		21.4512	0.888302		21.4512	0.8836		21.4511	0.88479		21.4511	0.886343		21.4512	0.888758		21.4512	0.886868		21.4512	0.888997		21.4512	0.888645		21.4511	0.890671		21.4511	0.889101		21.4512	0.888004
21.5012	0.867816		21.5012	0.88856		21.5012	0.875943		21.5011	0.886475		21.5011	0.883584		21.5012	0.890594		21.5012	0.885423		21.5012	0.890215		21.5011	0.888709		21.5012	0.893074		21.5012	0.891484		21.5012	0.889503		21.5012	0.888519		21.5011	0.890884		21.5011	0.887305		21.5012	0.890936
21.5512	0.869466		21.5512	0.891572		21.5512	0.881155		21.5511	0.889365		21.5511	0.886403		21.5512	0.892414		21.5512	0.888112		21.5512	0.890156		21.5512	0.888473		21.5512	0.890682		21.5512	0.889346		21.5512	0.894555		21.5512	0.889354		21.5511	0.894962		21.5511	0.893884		21.5512	0.892821
21.6012	0.870019		21.6012	0.895866		21.6012	0.881746		21.6011	0.893178		21.6011	0.887885		21.6012	0.894457		21.6012	0.888573		21.6012	0.893695		21.6012	0.892175		21.6012	0.895014		21.6012	0.893989		21.6012	0.896976		21.6012	0.893656		21.6011	0.894406		21.6011	0.893726		21.6012	0.893897
21.6512	0.870525		21.6512	0.893903		21.6512	0.879777		21.6511	0.893378		21.6511	0.886888		21.6512	0.895125		21.6512	0.892204		21.6512	0.895893		21.6512	0.892314		21.6512	0.896452		21.6512	0.894911		21.6512	0.894545		21.6512	0.895271		21.6511	0.894625		21.6511	0.893457		21.6512	0.896021
21.7012	0.870635		21.7012	0.896434		21.7012	0.883206		21.7011	0.895596		21.7011	0.890419		21.7012	0.898151		21.7012	0.891423		21.7012	0.894848		21.7012	0.890851		21.7012	0.893689		21.7012	0.89579		21.7012	0.897411		21.7012	0.896769		21.7011	0.896109		21.7011	0.89435		21.7012	0.899994
21.7512	0.874146		21.7512	0.89583		21.7512	0.885937		21.7511	0.898593		21.7511	0.891683		21.7512	0.89561		21.7512	0.892352		21.7512	0.898437		21.7512	0.89341		21.7512	0.896846		21.7512	0.894222		21.7512	0.89831		21.7512	0.895593		21.7511	0.90084		21.7511	0.898289		21.7512	0.900305
21.8012	0.874114		21.8012	0.898221		21.8012	0.886453		21.8011	0.901365		21.8011	0.89403		21.8012	0.900298		21.8012	0.893866		21.8012	0.897274		21.8012	0.89717		21.8012	0.895762		21.8012	0.897767		21.8012	0.899909		21.8012	0.89822		21.8012	0.903201		21.8011	0.901214		21.8012	0.89876
21.8512	0.874769		21.8512	0.900353		21.8512	0.888029		21.8511	0.899535		21.8511	0.896095		21.8512	0.901384		21.8512	0.896549		21.8512	0.898465		21.8512	0.897052		21.8512	0.898043		21.8512	0.898445		21.8512	0.902237		21.8512	0.898553		21.8512	0.901742		21.8512	0.898795		21.8512	0.901118
21.9012	0.88017		21.9012	0.901536		21.9012	0.890019		21.9012	0.902877		21.9011	0.893021		21.9012	0.901181		21.9012	0.896599		21.9012	0.902121		21.9012	0.897582		21.9012	0.89958		21.9012	0.900299		21.9012	0.900244		21.9012	0.899915		21.9012	0.90742		21.9012	0.901693		21.9012	0.901665
21.9512	0.882763		21.9512	0.902238		21.9512	0.890355		21.9512	0.897593		21.9512	0.89877		21.9512	0.900699		21.9512	0.89702		21.9512	0.903138		21.9512	0.900281		21.9512	0.901938		21.9512	0.903413		21.9512	0.90536		21.9512	0.900196		21.9512	0.9029		21.9512	0.903626		21.9512	0.904146
21.9912	0.882763		21.9912	0.902238		21.9912	0.890355		21.9912	0.897593		21.9912	0.89877		21.9912	0.900699		21.9912	0.89702		21.9912	0.903138		21.9912	0.900281		21.9912	0.901938		21.9912	0.903413		21.9912	0.90536		21.9912	0.900196		21.9912	0.9029		21.9912	0.903626		21.9912	0.904146
