# Supplementary material for: Binding and sequestration of poison frog alkaloids by a plasma globulin
Source: eLife journal article supplement (doi:10.7554/elife.85096), 2023-12-14
Supplement: fig5-data1 [file OsABG+PTX_R1 analysis_CapillaryScanRawData.xlsx]

## Sheet: RawData
NanoTemper Technologies	NanoTemper Technologies
MO.Affinity Analysis v3.0.5	MO.Affinity Analysis v3.0.5
Origin of exported data	Origin of exported data
Project Title:	20230407_BSA+PTX
Comment:
Project File Path:	C:\Users\nanotemper\Desktop\Aurora_MST\20230407_BSA\BSA+PTX analysis.nta3
Analysis-Set Name:	OsABG+PTX
Exported from:	Capillary Scan (Raw Data Inspection)
Exported on:	2023-04-11 08:18:29
Sample Information	Sample Information		Sample Information	Sample Information		Sample Information	Sample Information		Sample Information	Sample Information		Sample Information	Sample Information		Sample Information	Sample Information		Sample Information	Sample Information		Sample Information	Sample Information		Sample Information	Sample Information		Sample Information	Sample Information		Sample Information	Sample Information		Sample Information	Sample Information		Sample Information	Sample Information		Sample Information	Sample Information		Sample Information	Sample Information		Sample Information	Sample Information
Merge-Set Name:	OsABG+PTX_R1 (#20)		Merge-Set Name:	OsABG+PTX_R1 (#20)		Merge-Set Name:	OsABG+PTX_R1 (#20)		Merge-Set Name:	OsABG+PTX_R1 (#20)		Merge-Set Name:	OsABG+PTX_R1 (#20)		Merge-Set Name:	OsABG+PTX_R1 (#20)		Merge-Set Name:	OsABG+PTX_R1 (#20)		Merge-Set Name:	OsABG+PTX_R1 (#20)		Merge-Set Name:	OsABG+PTX_R1 (#20)		Merge-Set Name:	OsABG+PTX_R1 (#20)		Merge-Set Name:	OsABG+PTX_R1 (#20)		Merge-Set Name:	OsABG+PTX_R1 (#20)		Merge-Set Name:	OsABG+PTX_R1 (#20)		Merge-Set Name:	OsABG+PTX_R1 (#20)		Merge-Set Name:	OsABG+PTX_R1 (#20)		Merge-Set Name:	OsABG+PTX_R1 (#20)
Run Name:	OsABG+PTX_R1 (#20)		Run Name:	OsABG+PTX_R1 (#20)		Run Name:	OsABG+PTX_R1 (#20)		Run Name:	OsABG+PTX_R1 (#20)		Run Name:	OsABG+PTX_R1 (#20)		Run Name:	OsABG+PTX_R1 (#20)		Run Name:	OsABG+PTX_R1 (#20)		Run Name:	OsABG+PTX_R1 (#20)		Run Name:	OsABG+PTX_R1 (#20)		Run Name:	OsABG+PTX_R1 (#20)		Run Name:	OsABG+PTX_R1 (#20)		Run Name:	OsABG+PTX_R1 (#20)		Run Name:	OsABG+PTX_R1 (#20)		Run Name:	OsABG+PTX_R1 (#20)		Run Name:	OsABG+PTX_R1 (#20)		Run Name:	OsABG+PTX_R1 (#20)
Date of Measurement:	2023-04-11 07:37:51		Date of Measurement:	2023-04-11 07:38:17		Date of Measurement:	2023-04-11 07:38:44		Date of Measurement:	2023-04-11 07:39:11		Date of Measurement:	2023-04-11 07:39:38		Date of Measurement:	2023-04-11 07:40:04		Date of Measurement:	2023-04-11 07:40:31		Date of Measurement:	2023-04-11 07:40:57		Date of Measurement:	2023-04-11 07:41:24		Date of Measurement:	2023-04-11 07:41:51		Date of Measurement:	2023-04-11 07:42:18		Date of Measurement:	2023-04-11 07:42:44		Date of Measurement:	2023-04-11 07:43:11		Date of Measurement:	2023-04-11 07:43:37		Date of Measurement:	2023-04-11 07:44:04		Date of Measurement:	2023-04-11 07:44:31
Capillary Type:	Monolith Premium Capillary		Capillary Type:	Monolith Premium Capillary		Capillary Type:	Monolith Premium Capillary		Capillary Type:	Monolith Premium Capillary		Capillary Type:	Monolith Premium Capillary		Capillary Type:	Monolith Premium Capillary		Capillary Type:	Monolith Premium Capillary		Capillary Type:	Monolith Premium Capillary		Capillary Type:	Monolith Premium Capillary		Capillary Type:	Monolith Premium Capillary		Capillary Type:	Monolith Premium Capillary		Capillary Type:	Monolith Premium Capillary		Capillary Type:	Monolith Premium Capillary		Capillary Type:	Monolith Premium Capillary		Capillary Type:	Monolith Premium Capillary		Capillary Type:	Monolith Premium Capillary
Capillary Position:	1		Capillary Position:	9		Capillary Position:	2		Capillary Position:	10		Capillary Position:	3		Capillary Position:	11		Capillary Position:	4		Capillary Position:	12		Capillary Position:	5		Capillary Position:	13		Capillary Position:	6		Capillary Position:	14		Capillary Position:	7		Capillary Position:	15		Capillary Position:	8		Capillary Position:	16
Ligand:	PTX		Ligand:	PTX		Ligand:	PTX		Ligand:	PTX		Ligand:	PTX		Ligand:	PTX		Ligand:	PTX		Ligand:	PTX		Ligand:	PTX		Ligand:	PTX		Ligand:	PTX		Ligand:	PTX		Ligand:	PTX		Ligand:	PTX		Ligand:	PTX		Ligand:	PTX
Ligand Concentration:	0.001		Ligand Concentration:	3.90625e-06		Ligand Concentration:	0.0005		Ligand Concentration:	1.95313e-06		Ligand Concentration:	0.00025		Ligand Concentration:	9.76563e-07		Ligand Concentration:	0.000125		Ligand Concentration:	4.88281e-07		Ligand Concentration:	6.25e-05		Ligand Concentration:	2.44141e-07		Ligand Concentration:	3.125e-05		Ligand Concentration:	1.2207e-07		Ligand Concentration:	1.5625e-05		Ligand Concentration:	6.10352e-08		Ligand Concentration:	7.8125e-06		Ligand Concentration:	3.05176e-08
Target:	OsABG		Target:	OsABG		Target:	OsABG		Target:	OsABG		Target:	OsABG		Target:	OsABG		Target:	OsABG		Target:	OsABG		Target:	OsABG		Target:	OsABG		Target:	OsABG		Target:	OsABG		Target:	OsABG		Target:	OsABG		Target:	OsABG		Target:	OsABG
TargetConcentration:	5e-09		TargetConcentration:	5e-09		TargetConcentration:	5e-09		TargetConcentration:	5e-09		TargetConcentration:	5e-09		TargetConcentration:	5e-09		TargetConcentration:	5e-09		TargetConcentration:	5e-09		TargetConcentration:	5e-09		TargetConcentration:	5e-09		TargetConcentration:	5e-09		TargetConcentration:	5e-09		TargetConcentration:	5e-09		TargetConcentration:	5e-09		TargetConcentration:	5e-09		TargetConcentration:	5e-09
Measurement Settings	Measurement Settings		Measurement Settings	Measurement Settings		Measurement Settings	Measurement Settings		Measurement Settings	Measurement Settings		Measurement Settings	Measurement Settings		Measurement Settings	Measurement Settings		Measurement Settings	Measurement Settings		Measurement Settings	Measurement Settings		Measurement Settings	Measurement Settings		Measurement Settings	Measurement Settings		Measurement Settings	Measurement Settings		Measurement Settings	Measurement Settings		Measurement Settings	Measurement Settings		Measurement Settings	Measurement Settings		Measurement Settings	Measurement Settings		Measurement Settings	Measurement Settings
MST-Power:	Medium		MST-Power:	Medium		MST-Power:	Medium		MST-Power:	Medium		MST-Power:	Medium		MST-Power:	Medium		MST-Power:	Medium		MST-Power:	Medium		MST-Power:	Medium		MST-Power:	Medium		MST-Power:	Medium		MST-Power:	Medium		MST-Power:	Medium		MST-Power:	Medium		MST-Power:	Medium		MST-Power:	Medium
Excitation-Power:	15		Excitation-Power:	15		Excitation-Power:	15		Excitation-Power:	15		Excitation-Power:	15		Excitation-Power:	15		Excitation-Power:	15		Excitation-Power:	15		Excitation-Power:	15		Excitation-Power:	15		Excitation-Power:	15		Excitation-Power:	15		Excitation-Power:	15		Excitation-Power:	15		Excitation-Power:	15		Excitation-Power:	15
Excitation type:	Pico - RED		Excitation type:	Pico - RED		Excitation type:	Pico - RED		Excitation type:	Pico - RED		Excitation type:	Pico - RED		Excitation type:	Pico - RED		Excitation type:	Pico - RED		Excitation type:	Pico - RED		Excitation type:	Pico - RED		Excitation type:	Pico - RED		Excitation type:	Pico - RED		Excitation type:	Pico - RED		Excitation type:	Pico - RED		Excitation type:	Pico - RED		Excitation type:	Pico - RED		Excitation type:	Pico - RED
Thermostat Setpoint:	25		Thermostat Setpoint:	25		Thermostat Setpoint:	25		Thermostat Setpoint:	25		Thermostat Setpoint:	25		Thermostat Setpoint:	25		Thermostat Setpoint:	25		Thermostat Setpoint:	25		Thermostat Setpoint:	25		Thermostat Setpoint:	25		Thermostat Setpoint:	25		Thermostat Setpoint:	25		Thermostat Setpoint:	25		Thermostat Setpoint:	25		Thermostat Setpoint:	25		Thermostat Setpoint:	25
Included	Included		Included	Included		Included	Included		Included	Included		Included	Included		Included	Included		Included	Included		Included	Included		Included	Included		Included	Included		Included	Included		Included	Included		Included	Included		Included	Included		Included	Included		Included	Included
Position [capillary-index]	Raw Fluorescence [counts]		Position [capillary-index]	Raw Fluorescence [counts]		Position [capillary-index]	Raw Fluorescence [counts]		Position [capillary-index]	Raw Fluorescence [counts]		Position [capillary-index]	Raw Fluorescence [counts]		Position [capillary-index]	Raw Fluorescence [counts]		Position [capillary-index]	Raw Fluorescence [counts]		Position [capillary-index]	Raw Fluorescence [counts]		Position [capillary-index]	Raw Fluorescence [counts]		Position [capillary-index]	Raw Fluorescence [counts]		Position [capillary-index]	Raw Fluorescence [counts]		Position [capillary-index]	Raw Fluorescence [counts]		Position [capillary-index]	Raw Fluorescence [counts]		Position [capillary-index]	Raw Fluorescence [counts]		Position [capillary-index]	Raw Fluorescence [counts]		Position [capillary-index]	Raw Fluorescence [counts]
0.501098	100.916		8.50068	47.4338		1.50161	57.6364		9.50037	40.5417		2.50148	42.5398		10.5005	34.1148		3.50063	39.3637		11.501	36.7899		4.50139	47.401		12.5014	40.0228		5.50015	33.7122		13.5007	39.8349		6.50021	33.9776		14.5007	39.6261		7.50029	30.3511		15.5005	40.1033
0.502765	98.688		8.50214	49.0741		1.50293	59.2647		9.50134	35.1377		2.50321	40.1987		10.5022	33.3901		3.50174	37.7622		11.5026	40.4612		4.50299	45.1046		12.5028	36.5335		5.5014	41.7794		13.5024	37.1508		6.50153	33.3811		14.5025	34.9081		7.50147	31.1772		15.5021	38.129
0.503807	86.6812		8.50311	46.4467		1.5039	62.0592		9.5028	36.605		2.50446	50.8695		10.5038	33.9806		3.50278	35.7551		11.5042	36.6408		4.50396	48.2719		12.5037	38.4958		5.5023	36.9122		13.5035	36.8138		6.50243	34.3116		14.5036	36.1428		7.50321	35.7193		15.5031	42.683
0.504848	88.8404		8.50429	41.8748		1.50515	54.991		9.50453	38.5227		2.50537	56.4226		10.5048	38.7344		3.50431	35.8266		11.5053	29.7129		4.50507	46.2976		12.5049	41.4483		5.50376	39.8737		13.5044	36.8615		6.50375	39.3637		14.5046	38.0336		7.5048	29.2894		15.5041	33.9418
0.506515	88.9687		8.50603	49.8913		1.50689	47.0133		9.50592	47.3742		2.50682	44.1205		10.5058	33.2439		3.50604	39.0535		11.5064	25.642		4.50674	43.8431		12.5067	37.285		5.5055	35.6089		13.506	36.8913		6.50556	34.8007		14.5061	48.3256		7.50584	26.8379		15.5058	30.6583
0.508251	93.0574		8.50756	53.8309		1.50848	47.8036		9.50682	40.9383		2.5087	41.7108		10.5076	33.1306		3.50729	36.3396		11.5079	33.1754		4.50847	42.9156		12.5083	34.2192		5.50682	46.4765		13.5078	34.1386		6.50702	29.0389		14.5079	45.0838		7.50689	37.5295		15.5075	37.1806
0.509224	89.1237		8.50853	51.9401		1.50946	54.7286		9.50807	44.1026		2.51002	33.6525		10.5092	36.951		3.5082	43.1005		11.5096	38.3914		4.50945	39.7544		12.5093	34.9856		5.50772	33.0441		13.509	43.5031		6.50792	27.8668		14.5091	44.0996		7.50855	35.3733		15.5086	39.9452
0.510057	83.5319		8.50964	53.1062		1.5105	53.2792		9.50981	41.8987		2.51085	38.135		10.5103	33.8553		3.50959	47.908		11.5108	38.4541		4.51049	46.7479		12.5104	38.6449		5.50911	31.9824		13.5099	36.3008		6.50917	35.8445		14.51	37.1866		7.51022	34.9946		15.5096	39.9363
0.511585	86.72		8.51144	49.6109		1.51223	47.4816		9.51134	40.2226		2.51224	40.1778		10.5113	35.5612		3.51139	49.6557		11.5118	29.4624		4.51222	55.1014		12.5121	36.0652		5.51091	31.6633		13.5115	34.1058		6.51104	35.7879		14.5116	42.1104		7.51126	36.6289		15.5112	45.7697
0.513251	78.8437		8.51297	57.523		1.5139	46.2946		9.51224	33.7569		2.51412	41.9762		10.5129	35.0542		3.51271	50.443		11.5133	24.5833		4.51396	57.5648		12.5137	36.2293		5.5123	31.8631		13.5133	33.736		6.51243	35.7431		14.5134	34.7113		7.5123	38.0664		15.513	37.8367
0.514432	96.5378		8.51388	53.6699		1.51494	59.5272		9.51342	34.9588		2.51537	42.7576		10.5147	26.146		3.51361	40.7892		11.5151	32.2508		4.51493	47.917		12.5146	35.3614		5.51314	46.4556		13.5144	31.0639		6.51327	38.4093		14.5146	38.1469		7.51397	44.6305		15.514	35.5105
0.515404	97.4832		8.51485	58.7279		1.51598	49.7451		9.51523	37.112		2.51613	41.332		10.5156	38.5495		3.515	41.9523		11.5163	31.216		4.51577	47.6426		12.5156	40.2405		5.51432	47.3921		13.5152	35.6954		6.51438	39.5247		14.5154	41.499		7.51564	35.4747		15.5149	37.8785
0.516862	91.5603		8.51644	52.4531		1.51765	44.7766		9.51676	35.934		2.51738	42.5398		10.5165	42.4414		3.51688	44.9108		11.5171	41.171		4.51729	52.1668		12.5172	38.964		5.51598	34.1386		13.5166	43.2765		6.51604	35.2898		14.5167	35.4717		7.51668	36.5633		15.5163	35.8744
0.518599	90.9459		8.51797	63.5414		1.51939	46.7151		9.51766	40.8131		2.51912	44.031		10.5181	40.0824		3.51813	46.5093		11.5185	37.9351		4.51896	51.5614		12.5188	37.1508		5.51744	41.9762		13.5183	42.3311		6.5175	31.0818		14.5184	38.803		7.51751	32.5878		15.518	29.701
0.519918	110.221		8.51908	61.3315		1.52036	52.6022		9.51863	46.8016		2.5205	41.505		10.5197	29.9515		3.51889	42.85		11.5202	38.8955		4.52014	48.2391		12.5199	29.7039		5.51841	39.99		13.5196	33.5392		6.51854	30.5897		14.5198	33.5511		7.51904	31.3621		15.5193	33.578
0.520821	94.1161		8.52013	52.0773		1.52126	46.8791		9.5203	43.6165		2.52148	38.7791		10.5208	36.5603		3.52014	36.2472		11.5214	39.3488		4.52111	43.861		12.5209	27.6253		5.51959	34.2937		13.5206	36.0473		6.51965	30.9625		14.5207	33.3662		7.52064	34.4428		15.5202	44.532
0.52214	104.289		8.52165	54.7375		1.52279	48.7759		9.52182	47.2758		2.52266	41.9851		10.5218	35.1049		3.52188	34.75		11.5224	41.8211		4.52257	45.6713		12.5224	33.7837		5.52126	38.2185		13.5218	38.126		6.52132	37.5981		14.522	34.8156		7.52182	34.4369		15.5215	42.1343
0.523946	99.4217		8.52339	56.0677		1.52439	49.7839		9.52294	51.1438		2.52432	39.313		10.5233	39.0147		3.52327	38.1707		11.5237	37.6488		4.52438	41.5736		12.5242	32.6952		5.52293	42.0179		13.5235	36.3307		6.52299	33.8673		14.5238	37.0941		7.52279	31.2279		15.5234	31.723
0.525404	98.7924		8.52464	45.4446		1.52557	61.8534		9.52398	52.2384		2.52592	43.2377		10.525	39.82		3.52424	35.8237		11.5255	32.9338		4.52577	38.1886		12.5255	38.2065		5.52397	37.8278		13.5251	41.0159		6.5241	33.8166		14.5254	31.213		7.52425	38.5584		15.5247	33.6555
0.526237	96.4006		8.52554	41.3201		1.52654	56.008		9.52551	42.7665		2.52696	41.3857		10.5263	32.8175		3.52549	42.2834		11.5269	32.9815		4.52667	42.0925		12.5264	31.3263		5.52494	38.4869		13.526	38.7314		6.52507	39.9631		14.5264	35.4896		7.52598	32.4566		15.5257	40.7952
0.527557	90.9221		8.527	45.9964		1.528	52.9631		9.52724	39.7096		2.52807	38.0813		10.5272	29.9366		3.52716	35.4777		11.5278	29.9932		4.52792	42.5727		12.5278	32.5043		5.52661	46.9149		13.5272	32.2896		6.52667	29.9187		14.5274	42.2267		7.52737	32.1942		15.5269	39.7931
0.529362	87.2657		8.52881	50.103		1.52973	65.4888		9.52842	52.4412		2.52974	46.5839		10.5285	33.5571		3.52875	42.7695		11.529	28.4424		4.52972	44.5261		12.5296	37.4878		5.52834	39.2325		13.529	34.4011		6.5284	28.4186		14.5291	43.3242		7.52834	30.4614		15.5287	26.9572
0.530821	100.961		8.53013	52.8915		1.53112	51.1588		9.52932	38.1529		2.53141	43.4703		10.5304	37.8367		3.52979	45.0838		11.5308	36.1308		4.53118	44.0072		12.531	33.0501		5.52946	37.8725		13.5306	37.6608		6.52958	38.8895		14.5308	40.3359		7.52959	35.093		15.5302	28.6184
0.531654	104.08		8.53096	48.8027		1.53203	42.4802		9.53078	38.2244		2.53245	42.1372		10.5318	33.7569		3.53084	40.8757		11.5324	34.3176		4.53209	41.5378		12.5318	31.723		5.53043	35.6209		13.5316	41.168		6.53049	26.6679		14.5318	44.9704		7.53133	38.7553		15.5312	24.9024
0.532765	89.079		8.53242	44.7855		1.53328	46.6197		9.53259	41.3738		2.53349	44.711		10.5327	29.9157		3.5325	42.9305		11.5334	37.3297		4.53334	43.2646		12.5332	28.1561		5.53203	29.7755		13.5326	39.6947		6.53208	23.3277		14.5329	44.5947		7.53286	38.5316		15.5323	31.4098
0.534432	94.1012		8.53422	43.366		1.53508	50.7949		9.53384	37.625		2.53516	46.3125		10.534	27.336		3.53417	45.8204		11.5345	32.5521		4.53521	40.4433		12.5351	29.2148		5.53376	34.4011		13.5343	34.8007		6.53389	35.3316		14.5345	43.3451		7.53376	44.1593		15.5341	40.5805
0.53596	99.878		8.53554	57.8869		1.53654	52.0654		9.53474	37.0703		2.53682	47.3324		10.5358	35.9221		3.53528	38.6598		11.5362	27.7893		4.53667	48.1794		12.5364	37.4788		5.53487	37.6816		13.536	30.7269		6.535	36.6706		14.5362	49.5483		7.53501	41.7644		15.5357	32.1375
0.537001	91.6438		8.53631	54.9046		1.53744	52.5306		9.53627	31.8005		2.53787	41.9016		10.5373	34.7948		3.53625	41.1173		11.5379	36.5335		4.53743	54.8211		12.5371	34.8514		5.53571	30.5062		13.5369	30.1155		6.53584	28.0428		14.5372	43.4047		7.53682	37.8069		15.5365	28.4036
0.538043	97.7158		8.53756	57.9764		1.53869	57.5588		9.53807	37.3357		2.53877	44.2487		10.5381	30.5807		3.53792	46.6495		11.5388	36.3366		4.53854	54.0904		12.5383	32.4596		5.53716	30.8491		13.5378	29.6801		6.53722	33.5213		14.5381	42.0537		7.53834	33.9269		15.5376	31.034
0.53971	102.07		8.53922	62.8882		1.54057	53.0764		9.53932	49.4201		2.54023	48.6954		10.5392	35.8594		3.53966	55.4891		11.5397	31.5679		4.54021	47.5352		12.5401	33.7122		5.53883	39.7394		13.5394	35.0154		6.53889	31.3889		14.5396	41.1113		7.53918	35.8535		15.5393	36.098
0.541376	90.5284		8.54068	63.5772		1.54203	53.9144		9.54009	40.6908		2.54189	42.5756		10.5408	25.9671		3.5407	44.3382		11.5413	28.1293		4.54174	43.2496		12.5414	32.5222		5.54008	41.0696		13.541	31.9079		6.54021	34.6099		14.5412	40.497		7.54022	35.0304		15.5408	30.6255
0.542487	87.3224		8.54165	65.5693		1.54286	58.7667		9.54134	38.9014		2.54307	45.9636		10.5424	30.9416		3.5416	40.1659		11.5429	30.2348		4.54278	38.9014		12.5424	39.8558		5.54105	45.1464		13.5421	25.3617		6.54118	36.9868		14.5424	44.8183		7.54189	33.402		15.5419	31.4933
0.54346	77.8983		8.54283	54.1799		1.5439	65.3725		9.54307	42.4772		2.54405	40.4284		10.5434	35.7819		3.54306	39.7901		11.544	36.951		4.54389	47.404		12.5436	34.7053		5.54244	39.5247		13.5431	35.6835		6.54243	33.2678		14.5434	41.2753		7.54341	41.7197		15.5429	31.6574
0.544987	91.2799		8.5445	53.9681		1.54564	56.8252		9.54446	44.5977		2.54543	41.8539		10.5445	30.5092		3.54472	28.0935		11.545	35.4777		4.54549	46.9209		12.5453	30.6016		5.54418	29.859		13.5446	43.2705		6.54417	28.0547		14.5449	43.4882		7.54446	37.6518		15.5445	36.7989
0.546723	97.4355		8.54617	59.2975		1.54709	47.0581		9.54544	36.1159		2.54724	34.4757		10.5461	29.8918		3.54591	42.5876		11.5465	34.0462		4.54716	43.6582		12.5469	27.4374		5.54564	36.2412		13.5465	42.51		6.5457	29.853		14.5466	44.8422		7.5455	42.1104		15.5462	39.0028
0.547904	94.9572		8.54721	58.4088		1.54814	52.2473		9.54669	44.0489		2.54863	32.4		10.5478	31.3174		3.54688	45.3253		11.5482	29.3401		4.54834	42.4384		12.548	37.8099		5.54661	35.3674		13.5477	37.9023		6.5466	37.6429		14.548	41.0785		7.54709	37.0226		15.5475	45.4178
0.548876	92.0285		8.54825	60.5262		1.54918	51.4958		9.54835	38.976		2.54953	43.9058		10.5489	33.9955		3.54827	40.6908		11.5496	37.628		4.54924	46.4735		12.549	31.2607		5.54779	32.1047		13.5486	37.4878		6.54778	40.1421		14.5489	39.9601		7.54876	28.5528		15.5484	35.1467
0.550404	97.6025		8.54985	60.4427		1.55078	48.6715		9.54995	36.8287		2.55078	37.9172		10.5499	33.6227		3.55	39.0953		11.5505	33.0948		4.55077	46.6465		12.5507	39.7842		5.54952	36.0951		13.55	34.9558		6.54952	26.823		14.5502	40.998		7.54994	26.9632		15.5498	27.9861
0.55221	94.8468		8.55158	65.9034		1.55251	57.6483		9.55099	34.9558		2.55259	38.9014		10.5514	36.9062		3.55139	51.2095		11.5519	33.2976		4.55257	45.6594		12.5524	35.3733		5.55105	39.474		13.5518	26.3339		6.55118	31.2249		14.552	44.9496		7.55091	28.4066		15.5516	42.2923
0.55339	100.096		8.5527	62.9031		1.55362	56.3361		9.55203	42.3758		2.55412	46.8314		10.5532	31.7409		3.55236	54.4691		11.5537	26.2355		4.55375	50.0135		12.5535	33.2261		5.55209	31.6812		13.5532	34.3385		6.55215	35.1139		14.5534	43.5568		7.55237	29.7994		15.5529	37.5385
0.554154	88.3841		8.55367	60.905		1.55459	55.8261		9.55377	43.1214		2.55502	47.911		10.5544	39.1728		3.55361	45.9785		11.555	32.7042		4.55466	47.6933		12.5544	36.2322		5.55327	31.2905		13.5541	32.6982		6.5532	29.8441		14.5543	38.6837		7.55418	39.981		15.5538	37.6995
0.555543	90.6626		8.55526	52.5873		1.55612	44.5499		9.55537	46.909		2.5562	47.6903		10.5553	34.4607		3.55542	44.9794		11.5559	41.4483		4.55618	42.3639		12.5561	29.6771		5.55501	31.043		13.5554	35.43		6.55493	34.3951		14.5556	33.2887		7.55543	33.8852		15.5553	36.5901
0.55721	103.502		8.557	51.2244		1.55793	49.605		9.55641	44.8571		2.558	49.0264		10.5568	32.9457		3.55695	36.5931		11.5573	44.0042		4.55806	45.5908		12.5578	29.1492		5.55661	35.8326		13.5573	39.7066		6.5566	31.6842		14.5574	34.7977		7.55633	28.7615		15.5571	37.9322
0.558529	98.026		8.55804	56.1482		1.55918	55.9484		9.55745	36.1398		2.55953	46.9835		10.5586	34.8514		3.55785	37.9053		11.5591	39.9482		4.55917	39.7812		12.5589	38.8269		5.55751	42.9395		13.5586	35.7461		6.5575	30.9684		14.5589	38.8239		7.55786	28.5528		15.5584	42.7963
0.559501	86.6216		8.55888	60.5978		1.56008	44.1026		9.55912	39.2742		2.56037	41.8241		10.5599	36.9719		3.55903	44.037		11.5605	37.4103		4.55993	48.3375		12.5597	28.9166		5.55848	39.3488		13.5594	38.4869		6.5584	32.7757		14.5597	42.8679		7.55966	29.7039		15.5592	44.6364
0.560821	87.2598		8.56033	67.5257		1.56154	50.3625		9.56085	40.7355		2.56141	49.6229		10.5606	40.4313		3.56084	41.4245		11.5613	38.5674		4.56132	45.218		12.5612	30.8372		5.56015	39.6112		13.5606	36.1905		6.56	32.3463		14.5608	50.8188		7.56084	38.6121		15.5604	33.9567
0.562557	80.0933		8.562	53.2374		1.56334	48.6327		9.56182	41.2008		2.56307	46.7897		10.5619	29.5667		3.56236	45.3611		11.5625	32.4596		4.56306	46.7747		12.5628	33.232		5.56168	36.435		13.5623	28.2814		6.56167	35.7342		14.5625	47.8543		7.56168	36.3724		15.5622	28.511
0.564015	109.705		8.56325	44.5231		1.56459	57.6393		9.56273	42.7039		2.5646	43.533		10.5637	34.6427		3.5632	45.7488		11.5642	29.5518		4.56438	44.0191		12.564	38.0902		5.56279	35.3763		13.5637	27.3539		6.56278	34.592		14.564	44.7915		7.56293	35.7342		15.5636	36.5036
0.564987	90.43		8.56422	52.7245		1.56536	59.3035		9.56419	38.5435		2.56564	45.0331		10.565	32.0659		3.56424	36.0026		11.5655	29.5608		4.56535	44.7498		12.565	37.8994		5.56383	40.4284		13.5648	35.6447		6.56375	32.7071		14.565	42.3162		7.56466	42.352		15.5645	38.0962
0.566099	102.1		8.56554	51.114		1.56675	44.8541		9.56585	37.4341		2.56668	40.5775		10.5659	42.349		3.56591	42.3967		11.5666	30.9655		4.5666	53.7653		12.5664	34.9737		5.56536	38.2304		13.5659	30.8909		6.56528	38.7404		14.5661	43.8551		7.56598	40.7922		15.5657	44.7826
0.567835	99.1384		8.56735	53.1211		1.56841	46.6823		9.56703	42.6681		2.56828	47.747		10.5672	38.8388		3.56743	44.3143		11.5677	37.1568		4.56834	55.9722		12.5682	28.3619		5.56709	37.625		13.5676	32.5938		6.56702	36.0235		14.5677	35.9877		7.56696	40.7057		15.5675	42.856
0.569432	79.0614		8.56874	50.789		1.56973	47.4905		9.568	41.0785		2.57002	56.9922		10.569	35.8475		3.56848	40.6819		11.5694	31.3711		4.56986	53.145		12.5696	29.2983		5.56834	39.0058		13.5692	35.5195		6.56827	35.0721		14.5695	35.0542		7.56821	50.2014		15.569	33.5541
0.570404	86.1772		8.56971	50.1835		1.57064	50.9232		9.56946	43.2049		2.5712	44.3591		10.5704	38.1737		3.56952	37.3297		11.571	30.536		4.57084	58.1642		12.5705	29.4146		5.56925	41.2694		13.5703	33.7331		6.56924	33.4259		14.5706	43.6135		7.56994	50.3804		15.5701	37.2432
0.571515	96.7823		8.57096	51.1468		1.57196	53.5058		9.5712	39.4412		2.57217	36.6378		10.5714	36.1428		3.57111	37.6608		11.5721	36.6856		4.57202	47.2012		12.5717	40.7654		5.57071	39.2682		13.5713	37.0613		6.57063	31.9944		14.5715	35.8445		7.57154	32.7548		15.5711	39.1728
0.573251	92.8457		8.57269	58.1493		1.57369	63.5831		9.57259	38.6628		2.57363	34.8305		10.5726	35.2332		3.57285	35.4867		11.5731	33.6615		4.57375	45.5073		12.5735	26.1401		5.57244	37.6309		13.5729	29.7188		6.57243	35.9668		14.5731	36.1308		7.57251	29.7874		15.5728	40.2912
0.574918	88.8434		8.57422	58.7547		1.57522	56.0199		9.57349	37.5027		2.57544	46.4855		10.5742	39.6381		3.57403	50.0285		11.5747	36.0503		4.57535	50.1955		12.5751	36.784		5.57376	42.352		13.5746	34.3176		6.57375	30.5241		14.5749	41.7466		7.57362	31.04		15.5745	34.3086
0.575821	88.1843		8.57513	60.0043		1.57619	47.3116		9.57481	35.8505		2.57668	46.5242		10.5758	35.2898		3.575	49.6765		11.5765	42.6353		4.57639	51.2453		12.576	40.9294		5.57466	34.9379		13.5758	43.2944		6.57465	23.9302		14.5761	46.6733		7.57529	31.5709		15.5755	38.0455
0.576724	98.0081		8.57631	61.1704		1.5773	53.5983		9.57655	34.6695		2.57759	43.2288		10.5769	35.7938		3.57646	45.0301		11.5776	39.3517		4.57743	45.0569		12.5771	37.2075		5.57612	33.9001		13.5767	34.6755		6.57604	28.0965		14.577	46.2678		7.57696	33.2708		15.5765	36.8615
0.578321	93.8656		8.57811	57.1324		1.57904	59.2796		9.57801	33.0262		2.57905	42.6144		10.5779	43.8879		3.57827	44.4963		11.5785	32.1733		4.57917	41.833		12.5789	31.7856		5.57793	38.135		13.5783	24.6191		6.57785	28.7615		14.5785	46.9805		7.578	37.7145		15.5781	36.0951
0.579987	85.703		8.57964	51.126		1.58064	51.5882		9.57898	44.031		2.58085	44.2845		10.5797	46.2856		3.57952	43.9415		11.5801	33.5571		4.58084	37.3655		12.5805	31.7737		5.57925	35.1497		13.5801	32.4984		6.57917	31.3979		14.5803	44.2785		7.57904	36.8257		15.5799	34.8633
0.581099	93.3288		8.58047	54.8688		1.58168	39.6768		9.58023	44.9138		2.5821	45.3432		10.5813	38.0693		3.58042	37.7174		11.5819	41.9762		4.58181	49.8585		12.5814	39.2951		5.58001	39.0207		13.5812	39.0625		6.58	31.7916		14.5815	38.9283		7.58078	48.8087		15.5809	38.7702
0.582071	81.1401		8.58151	61.1346		1.58272	44.5082		9.58196	46.2976		2.58287	41.2157		10.5823	40.2614		3.58188	42.9842		11.583	40.1689		4.58271	50.9112		12.5824	34.9976		5.58126	37.8427		13.582	32.5014		6.58118	30.6583		14.5823	41.3618		7.58244	33.8702		15.5818	43.4495
0.583598	85.2676		8.58318	52.3726		1.58446	47.8693		9.58342	45.379		2.58419	42.7963		10.5832	37.3506		3.58368	39.0744		11.5838	32.7787		4.58424	46.4049		12.584	38.7911		5.583	32.1554		13.5834	34.75		6.58292	31.723		14.5836	51.4063		7.58341	30.1065		15.5833	46.396
0.585335	98.2377		8.58471	54.2574		1.58612	42.4593		9.58426	44.362		2.58592	46.7688		10.5847	38.8298		3.58493	38.4481		11.5853	27.7624		4.58591	59.8433		12.5855	32.3612		5.58439	29.4952		13.5851	39.3667		6.58438	37.7562		14.5853	49.9539		7.58425	24.1986		15.585	33.5183
0.586585	88.2052		8.58575	47.2996		1.58703	51.9729		9.58537	43.7179		2.58724	40.8399		10.5864	40.482		3.58577	37.8069		11.5869	29.1433		4.58709	64.9759		12.5866	28.001		5.58536	29.5369		13.5864	34.1536		6.58535	35.8296		14.5866	49.1039		7.58577	32.1315		15.5861	42.5041
0.587487	98.9356		8.58679	51.5345		1.588	48.0929		9.58703	41.0278		2.58821	45.4864		10.5875	29.8173		3.58702	42.5905		11.5882	30.7686		4.58806	52.629		12.5877	37.6369		5.58654	27.2107		13.5874	25.8627		6.58653	31.4367		14.5876	42		7.58744	33.918		15.5871	39.5158
0.588876	95.1719		8.58839	62.5542		1.58953	52.0922		9.58856	35.4091		2.58946	41.1829		10.5885	39.2265		3.58875	47.0432		11.5892	30.0409		4.58952	43.6642		12.5892	32.4626		5.58821	39.4024		13.5887	28.3679		6.5882	31.9019		14.5889	42.6353		7.58862	36.28		15.5886	37.3745
0.590682	107.474		8.59013	63.4251		1.59119	51.9968		9.5896	43.5002		2.59113	44.3263		10.59	45.7995		3.59007	37.5832		11.5905	30.2616		4.59132	34.8872		12.591	28.7108		5.58987	50.4341		13.5904	35.7282		6.58979	32.722		14.5907	44.1503		7.58959	28.4215		15.5903	39.644
0.592071	97.2893		8.59131	60.5173		1.5923	46.4497		9.59064	47.8036		2.59273	46.3095		10.5917	29.9813		3.59104	34.1744		11.5922	28.7526		4.59264	40.9383		12.5922	29.9723		5.59091	48.5641		13.5919	33.575		6.5909	36.948		14.5922	42.1521		7.59105	31.5381		15.5917	38.2841
0.592973	103.516		8.59228	54.2276		1.59328	45.2896		9.59224	39.5754		2.5937	43.9356		10.5931	32.892		3.59229	39.8737		11.5937	35.8773		4.59347	48.9071		12.5931	29.8352		5.59189	34.8067		13.5928	34.3892		6.59188	36.6885		14.5932	37.8994		7.59279	34.7351		15.5926	31.2011
0.594293	97.4534		8.59374	54.2455		1.59473	43.9266		9.59398	37.2343		2.59481	41.5229		10.594	30.2229		3.59396	44.5112		11.5946	35.6477		4.59486	52.3547		12.5946	37.1478		5.59355	38.0485		13.594	43.7865		6.59347	36.5245		14.5943	42.7039		7.59411	37.3118		15.5938	32.8473
0.596168	86.5917		8.59547	63.8396		1.59647	48.8027		9.59516	40.0854		2.59648	38.5913		10.5954	35.3674		3.59556	39.9333		11.5958	33.2887		4.59667	54.7912		12.5964	44.1235		5.59522	43.3421		13.5958	46.4407		6.59521	32.8264		14.5961	40.4373		7.59501	39.2414		15.5956	38.7791
0.597487	89.1476		8.59679	62.6884		1.59779	50.2551		9.59606	48.0243		2.59814	42.1432		10.5972	33.9776		3.5966	28.8898		11.5976	34.9826		4.59806	54.2007		12.5977	31.0847		5.59633	39.5814		13.5974	36.9182		6.59632	39.1668		14.5977	39.7037		7.59633	37.8636		15.5971	37.4252
0.598321	100.009		8.59769	68.0566		1.59869	49.2381		9.59759	47.064		2.59918	40.3956		10.5985	32.5192		3.59771	33.2529		11.5991	29.9992		4.59896	46.1783		12.5986	39.7901		5.5973	35.9966		13.5983	27.0169		6.59729	30.4316		14.5986	34.5532		7.59814	30.4853		15.598	42.9126
0.599501	103.021		8.59915	53.6043		1.60008	56.4255		9.59939	43.0647		2.60023	39.3279		10.5994	33.6704		3.59938	33.8136		11.6001	32.0063		4.60028	46.897		12.6	40.4463		5.59897	42.6741		13.5995	31.1623		6.59889	32.3791		14.5997	38.3795		7.59959	30.2169		15.5993	44.2785
0.601168	89.6695		8.60096	58.0181		1.60189	55.7635		9.60057	48.9518		2.60189	50.9679		10.6007	37.5385		3.60104	36.3485		11.6012	33.0233		4.60209	41.7436		12.6019	35.5642		5.60071	45.6266		13.6012	34.8007		6.60063	33.7539		14.6014	48.7669		7.6005	32.4566		15.6011	37.8397
0.602557	99.0578		8.60214	72.8283		1.60328	44.6066		9.60148	42.185		2.60363	42.006		10.6025	33.3483		3.60216	38.7493		11.603	34.1476		4.60347	36.9122		12.6031	37.9501		5.60175	39.3368		13.6028	32.8055		6.60174	31.0698		14.6031	38.9551		7.60175	43.2139		15.6026	33.4378
0.603598	90.9668		8.60297	63.0374		1.60418	46.5421		9.60301	32.0987		2.6046	39.981		10.604	29.8411		3.60313	42.5488		11.6046	32.3164		4.60431	45.6683		12.6039	36.5394		5.60258	31.6156		13.6037	34.6814		6.60257	30.4853		14.604	38.293		7.60362	30.7955		15.6034	41.8867
0.604779	95.5119		8.60422	61.4746		1.6055	46.3065		9.60481	43.8938		2.6055	45.206		10.6048	30.5897		3.60479	42.2655		11.6055	41.2008		4.60542	46.6674		12.6051	30.6672		5.60404	33.1038		13.6047	31.9317		6.60403	36.101		14.605	46.0441		7.60508	31.0519		15.6045	45.8532
0.606376	94.6738		8.60596	64.5971		1.6073	43.524		9.60606	45.5073		2.60703	40.0228		10.6059	30.8849		3.60646	41.499		11.6064	28.2158		4.60716	40.5357		12.6068	28.9345		5.60571	34.4458		13.6063	30.9356		6.60577	30.4197		14.6065	47.401		7.60584	35.0483		15.6061	33.3931
0.608043	86.9884		8.60735	67.4959		1.60876	46.5839		9.60682	46.5063		2.60863	32.6236		10.6076	32.3612		3.60743	39.0833		11.608	32.9755		4.60861	34.9797		12.6082	26.7872		5.60689	38.0693		13.6079	33.3632		6.60695	32.5014		14.6082	38.2214		7.60696	36.8078		15.6077	31.1116
0.609085	78.104		8.60832	66.1151		1.60953	49.93		9.60814	39.7842		2.60981	36.4529		10.609	32.5729		3.60841	37.3655		11.6096	32.7877		4.60959	40.2405		12.6091	36.2024		5.60786	40.8847		13.609	31.1116		6.60792	34.9737		14.6093	42.2088		7.60862	40.2077		15.6087	28.6035
0.610126	97.4414		8.6095	66.3477		1.61071	50.4997		9.60981	32.6385		2.61078	44.7408		10.6101	39.1191		3.60993	38.0455		11.6107	35.096		4.6107	39.7365		12.6104	34.085		5.60932	38.0574		13.61	34.92		6.60931	43.2675		14.6102	45.0838		7.61008	35.7103		15.6097	37.109
0.611723	100.585		8.61124	75.1545		1.61237	50.1		9.61113	36.1905		2.61224	45.0987		10.6112	44.5947		3.61153	41.678		11.6118	28.857		4.61243	46.6853		12.6121	30.7418		5.61105	37.622		13.6115	39.7394		6.61104	41.1083		14.6118	37.8546		7.61112	32.4029		15.6113	38.63
0.613459	88.5392		8.61283	69.0109		1.61383	45.4178		9.6121	38.3437		2.61398	45.7101		10.6129	41.3052		3.61271	42.0895		11.6133	30.3451		4.6141	39.9989		12.6137	35.1675		5.61244	36.614		13.6133	39.5873		6.6125	33.7092		14.6135	42.5279		7.61223	46.1127		15.6131	27.1153
0.614571	83.8659		8.61381	77.767		1.61487	52.2831		9.61335	42.4772		2.6153	49.9181		10.6145	36.6706		3.61368	39.2474		11.6151	34.7918		4.61514	36.3903		12.6147	33.6853		5.61341	35.3018		13.6146	43.7179		6.6134	33.4587		14.6148	44.3501		7.61383	35.263		15.6143	27.2554
0.615543	97.1939		8.61485	74.9995		1.61598	52.4024		9.61509	38.123		2.6162	40.4731		10.6156	29.5608		3.61514	43.196		11.6163	40.3121		4.61618	37.3983		12.6157	26.7097		5.61466	40.1391		13.6155	45.3074		6.61458	33.1127		14.6157	48.2092		7.6155	33.581		15.6152	30.372
0.61714	108.947		8.61658	69.3748		1.61758	48.9071		9.61662	31.7737		2.61752	43.1542		10.6166	25.5138		3.61688	43.4405		11.6172	33.6317		4.61771	41.0218		12.6174	34.4458		5.61647	36.4082		13.6169	32.0421		6.61639	29.2476		14.6171	46.9418		7.61661	32.0122		15.6167	30.9923
0.618876	100.191		8.61825	65.4143		1.61925	48.3226		9.61766	37.2701		2.61932	37.9411		10.6181	37.5415		3.61827	44.9824		11.6186	24.1956		4.61945	38.5972		12.6191	44.9138		5.618	31.1683		13.6187	36.3336		6.61792	42.6114		14.6189	49.1696		7.61758	35.2391		15.6185	37.6727
0.619987	96.842		8.61929	78.6975		1.62036	47.6068		9.61877	45.212		2.62078	34.3265		10.6199	39.48		3.61917	44.5738		11.6204	27.8459		4.62063	45.3909		12.6202	39.0147		5.6189	30.9356		13.6201	41.6332		6.61889	32.6594		14.6203	49.8704		7.61911	29.2417		15.6197	36.3396
0.620751	93.4034		8.62033	67.9284		1.62133	49.9509		9.62044	43.9565		2.62169	40.7892		10.621	36.5692		3.62049	37.0762		11.6217	32.9398		4.6216	44.5082		12.6212	32.4894		5.62008	36.9212		13.6209	33.7659		6.62	30.7537		14.6212	44.4664		7.62091	28.171		15.6206	43.2258
0.62221	96.4781		8.622	74.1435		1.62293	47.1953		9.6221	44.5768		2.62293	36.772		10.6219	32.4954		3.62229	43.9654		11.6226	31.3561		4.62313	43.0111		12.6228	33.9687		5.62189	42.7576		13.6223	29.0747		6.62181	33.8822		14.6225	41.7883		7.62209	29.686		15.6222	36.784
0.623876	86.7677		8.62367	71.6473		1.62466	44.3382		9.62314	30.7477		2.62481	34.4011		10.6235	30.0469		3.62375	41.1918		11.6239	29.9544		4.62493	46.4825		12.6246	31.2458		5.62348	34.0074		13.6242	28.687		6.6234	34.243		14.6243	45.0122		7.62307	33.6973		15.624	33.3304
0.625126	78.8377		8.62464	58.0599		1.62584	54.5169		9.62419	47.0909		2.62627	34.422		10.6253	24.8427		3.62466	43.9863		11.6258	36.1159		4.62604	42.1253		12.6256	26.325		5.62432	31.8959		13.6255	27.9563		6.62424	28.4484		14.6257	41.6899		7.6246	35.0572		15.6252	39.6023
0.626098	81.1788		8.62547	60.5471		1.62675	47.2191		9.62585	43.6761		2.6271	42.1343		10.6264	26.0923		3.62591	43.3779		11.6271	38.7434		4.62688	39.5635		12.6264	25.9015		5.62536	32.2538		13.6262	32.9636		6.62521	29.9634		14.6265	43.9922		7.6264	39.6351		15.626	35.4747
0.627418	89.917		8.627	63.6935		1.62834	49.7153		9.62752	43.8312		2.62821	43.5717		10.6272	24.7891		3.62771	51.1737		11.6279	43.351		4.62827	38.3944		12.628	31.0162		5.62702	34.5055		13.6274	30.9416		6.62688	36.3754		14.6277	39.5217		7.62758	32.6326		15.6273	33.4885
0.629223	94.6291		8.62867	63.3356		1.63015	39.2921		9.62842	42.6532		2.62981	38.5823		10.6286	29.0866		3.62917	51.3973		11.6292	37.1568		4.62993	39.5098		12.6296	38.7344		5.62855	29.3311		13.6292	32.5461		6.62847	35.3316		14.6294	44.7468		7.62834	31.5888		15.629	32.2568
0.630612	95.2017		8.62985	69.9414		1.63126	44.9973		9.62932	39.474		2.63134	43.3033		10.6304	31.2577		3.63	47.8573		11.6309	39.4531		4.63125	39.9154		12.6307	38.8388		5.62959	39.8945		13.6306	33.1247		6.62952	38.6658		14.6309	44.0012		7.62973	30.8342		15.6304	35.0542
0.631585	91.5573		8.63082	69.5448		1.63203	47.5412		9.63085	43.5151		2.63238	36.2084		10.6316	32.0361		3.63111	43.354		11.6323	37.6488		4.63216	39.3935		12.6317	37.446		5.63071	33.736		13.6315	34.2788		6.63056	36.9062		14.6318	40.7057		7.6314	37.5385		15.6313	41.5855
0.632765	87.6743		8.63228	69.336		1.63341	44.7468		9.63252	37.619		2.63349	40.2882		10.6326	39.0416		3.63278	41.9613		11.6332	33.7748		4.63347	43.1333		12.6332	31.8721		5.6323	41.9464		13.6327	32.2807		6.63209	42.5428		14.633	41.5348		7.63272	45.8293		15.6326	37.7741
0.634501	72.7806		8.63401	69.6939		1.63515	50.4191		9.63363	38.3139		2.63509	35.6119		10.6339	44.2964		3.63424	40.1003		11.6344	32.6475		4.63528	38.8507		12.6349	34.7798		5.63404	38.9133		13.6344	31.0758		6.63382	34.6904		14.6347	39.1549		7.63369	40.2614		15.6344	39.6798
0.636029	82.6372		8.6354	59.7747		1.6364	43.4524		9.6346	47.911		2.63675	39.5963		10.6356	42.5995		3.63528	32.8324		11.6361	33.8106		4.63674	44.8959		12.6363	31.2011		5.63522	25.8836		13.636	29.9276		6.63507	25.5018		14.6364	34.8753		7.63494	30.0081		15.6359	31.2249
0.637001	79.127		8.63631	70.9465		1.63737	48.925		9.63613	48.1168		2.63787	40.3449		10.6371	32.3493		3.63639	32.9934		11.6377	40.5447		4.63771	39.4531		12.6372	27.6998		5.63619	38.8119		13.6371	35.3912		6.63597	32.7071		14.6374	44.9347		7.63668	24.1986		15.6369	33.7509
0.638182	80.9671		8.63763	64.3138		1.63869	52.4352		9.63787	47.8752		2.63884	41.2366		10.6381	35.3525		3.63799	37.0375		11.6387	35.6089		4.63889	48.4985		12.6385	33.1157		5.63765	40.8847		13.6381	35.6		6.63743	27.8758		14.6384	40.5357		7.63821	30.3064		15.638	46.6883
0.639918	71.4057		8.63936	77.9132		1.64043	46.9805		9.63919	41.0338		2.64037	43.5777		10.6392	37.9471		3.63972	32.4328		11.6398	38.1797		4.64063	46.6793		12.6403	31.1056		5.63946	37.7532		13.6398	32.8562		6.63924	38.0187		14.64	35.7402		7.63918	31.5261		15.6397	39.0237
0.641515	82.4135		8.64082	66.8189		1.64189	53.9353		9.64009	42.5846		2.64217	49.3723		10.641	40.5506		3.64084	38.7553		11.6414	29.7188		4.64222	47.0968		12.6418	36.1249		5.64064	42.5727		13.6415	38.9491		6.64056	34.0074		14.6418	33.8225		7.64036	33.0054		15.6414	31.8184
0.642418	94.0028		8.64179	65.6379		1.64279	45.895		9.64148	41.0904		2.64335	49.259		10.6425	38.1141		3.64181	33.9209		11.6431	33.2201		4.6432	44.7289		12.6427	46.1455		5.64154	37.2611		13.6426	42.5458		6.64146	42.3609		14.6429	31.0907		7.64209	40.9324		15.6425	39.6768
0.64339	87.215		8.64304	71.4624		1.64397	37.4132		9.64328	43.7298		2.64432	40.1272		10.6435	38.5167		3.64334	36.3664		11.6442	28.5766		4.64431	50.9381		12.6439	43.3331		5.64307	38.5883		13.6436	35.3018		6.64285	45.212		14.6439	37.4878		7.64369	47.4726		15.6434	36.4857
0.644987	80.7464		8.64485	70.174		1.64571	41.3141		9.64467	45.4864		2.64585	46.5719		10.6446	36.1964		3.64514	32.9815		11.6452	36.0115		4.64604	47.2817		12.6457	39.7335		5.64487	36.8675		13.6452	36.0921		6.64472	40.0914		14.6454	46.2111		7.64466	42.8023		15.6451	29.4475
0.646585	83.4543		8.64631	66.7205		1.6473	46.4855		9.64557	50.3386		2.64766	46.8612		10.6463	37.8516		3.64632	35.7431		11.6469	40.2614		4.64764	45.2866		12.6472	34.8604		5.64605	42.4623		13.6469	35.1914		6.64604	39.2593		14.6472	40.3836		7.64578	42.0716		15.6468	32.2359
0.647696	77.2392		8.64714	69.0229		1.64828	57.8779		9.64682	36.1517		2.64884	46.903		10.648	38.5286		3.64729	32.2717		11.6486	39.8737		4.64854	38.7314		12.648	32.1822		5.64689	30.867		13.648	29.021		6.64681	40.5685		14.6483	41.6094		7.64751	36.7005		15.6478	32.8413
0.648737	90.2839		8.64818	70.2993		1.64939	52.5634		9.64863	41.7734		2.6496	51.448		10.6489	33.3543		3.64875	34.0492		11.6496	38.9462		4.64952	33.2589		12.6491	32.215		5.64821	36.8824		13.6488	35.4747		6.64806	36.9182		14.6491	43.8759		7.64918	33.0262		15.6486	35.3525
0.650265	91.0712		8.64992	70.0667		1.65112	58.1642		9.65009	46.4586		2.65092	40.5119		10.6499	26.0327		3.65056	30.2139		11.6505	29.9694		4.65111	47.0163		12.6508	32.8055		5.64987	41.0189		13.6503	40.8459		6.64972	39.7544		14.6505	51.2244		7.65008	30.5986		15.6502	40.5208
0.652001	79.3387		8.65137	62.921		1.65279	52.7275		9.65085	34.1297		2.65266	42.4056		10.6515	24.3059		3.65174	34.92		11.6519	37.5355		4.65278	56.7655		12.6523	31.9317		5.65119	42.1193		13.6519	38.8865		6.65118	35.9579		14.6522	48.6119		7.65098	32.0868		15.6518	38.8418
0.653251	90.5791		8.65242	73.3353		1.65369	48.6685		9.65196	29.8709		2.65398	41.168		10.6531	26.5665		3.6525	40.4343		11.6536	34.3385		4.65382	49.3574		12.6534	43.4763		5.65216	45.5997		13.6531	33.909		6.65215	29.2268		14.6535	47.3593		7.65258	30.9744		15.653	36.1607
0.654154	105.431		8.65353	69.1601		1.65466	44.5082		9.6537	35.6507		2.65488	48.2808		10.6542	36.8048		3.65389	48.5075		11.6548	36.8705		4.65486	47.8722		12.6544	47.7828		5.65341	43.3481		13.6541	31.9824		6.65333	33.9001		14.6544	45.045		7.65418	29.865		15.654	33.0143
0.655612	92.965		8.65513	67.2812		1.65626	47.6337		9.65516	38.2393		2.6562	46.1514		10.6551	34.8097		3.65556	47.8186		11.6557	34.4309		4.65639	50.2551		12.656	40.7505		5.65515	38.12		13.6555	28.8391		6.65507	39.8528		14.6557	46.9775		7.65529	25.5883		15.6554	33.1008
0.657348	78.2621		8.65679	73.3115		1.65786	51.3258		9.6562	30.7507		2.65794	47.2221		10.6567	31.4844		3.65688	42.4295		11.6572	36.1398		4.65813	45.4417		12.6578	40.7773		5.65675	34.577		13.6573	32.3761		6.65667	34.422		14.6575	54.0963		7.65626	32.3045		15.6572	32.0421
0.658668	91.4589		8.65797	81.5785		1.65897	54.9672		9.65731	31.0519		2.65939	45.6087		10.6585	30.7984		3.65785	42.5727		11.6589	34.9916		4.65938	41.505		12.6589	38.4928		5.65772	38.1171		13.6587	35.2361		6.65771	37.1061		14.659	47.908		7.65779	43.7686		15.6586	37.6071
0.659571	93.1737		8.65887	70.1263		1.65994	45.1673		9.65891	40.321		2.66037	44.3173		10.6597	40.2792		3.6591	38.1588		11.6603	36.4589		4.66028	49.6318		12.6598	32.1703		5.65883	41.6452		13.6596	34.9677		6.65875	37.5087		14.6599	49.9271		7.65959	47.7172		15.6595	36.271
0.66096	87.9278		8.6604	65.4232		1.66147	42.0865		9.66064	43.2884		2.66155	51.9043		10.6606	39.2951		3.66084	40.0884		11.6613	31.3651		4.66174	50.5295		12.6613	30.4853		5.66057	45.886		13.6608	37.1776		6.66042	34.7411		14.6611	49.7601		7.66084	42.7158		15.6608	39.2175
0.662835	85.2407		8.66221	64.8655		1.66321	33.7867		9.66175	27.3777		2.66328	48.0721		10.662	33.235		3.66236	38.3795		11.6626	31.9705		4.66354	40.8071		12.6631	27.6938		5.66216	42.6621		13.6626	37.1776		6.66208	30.038		14.6629	44.1205		7.66175	34.8425		15.6626	37.9262
0.664154	88.0561		8.66339	68.1729		1.66453	41.1262		9.66273	36.617		2.66488	40.0824		10.6638	37.0911		3.66334	31.3114		11.6643	30.5688		4.66486	40.2017		12.6644	36.1368		5.66321	43.0588		13.6642	36.945		6.6632	37.622		14.6645	41.6362		7.66314	30.5509		15.664	38.7434
0.664918	75.8584		8.66429	66.7056		1.66543	33.9358		9.66426	39.1251		2.66592	44.1891		10.6651	25.4571		3.66445	44.9197		11.6658	27.998		4.66577	40.0914		12.6653	33.0233		5.66425	36.5961		13.6651	31.5858		6.66417	34.4637		14.6655	38.8537		7.66494	29.0836		15.665	36.3068
0.666168	81.2057		8.66582	67.0545		1.66682	42.5935		9.66606	40.9294		2.66696	47.747		10.666	23.3933		3.66618	46.4735		11.6667	32.6356		4.66709	43.87		12.6668	34.6427		5.66591	31.2965		13.6662	29.695		6.66583	36.4082		14.6666	42.2774		7.66633	34.923		15.6662	29.9455
0.667835	87.2121		8.66769	60.0759		1.66862	44.377		9.66724	41.6034		2.6687	43.1244		10.6674	30.0588		3.66785	39.9572		11.6679	31.374		4.66896	48.0512		12.6686	38.1767		5.66758	37.625		13.668	26.8021		6.66757	36.7124		14.6683	42.6919		7.66723	37.4997		15.668	36.1308
0.669293	83.7734		8.66888	54.2127		1.66994	42.0895		9.66814	45.6564		2.67037	40.9234		10.6692	32.5014		3.66889	32.7012		11.6697	42.2834		4.67028	42.185		12.6698	36.5454		5.66855	30.3451		13.6696	28.0517		6.66861	27.2435		14.6699	34.5323		7.66855	32.6743		15.6695	40.9026
0.670265	81.9542		8.66964	70.4395		1.67084	37.1418		9.66967	39.1758		2.67134	44.5261		10.6706	28.5617		3.66993	35.5642		11.6712	46.7151		4.67104	40.6789		12.6706	39.1609		5.66946	35.1347		13.6705	30.4257		6.66945	33.6674		14.6708	40.831		7.67036	30.6285		15.6702	48.3136
0.671446	87.2359		8.67096	61.5313		1.67223	42.516		9.67148	38.5644		2.67224	46.6048		10.6714	35.3763		3.6716	41.7436		11.6721	44.2099		4.67229	47.738		12.6719	38.3228		5.67098	34.1893		13.6715	38.2364		6.67097	38.9909		14.6718	51.5256		7.67175	40.0287		15.6713	40.6759
0.673112	96.8151		8.67269	69.5		1.67404	42.4742		9.67259	32.5043		2.67377	45.045		10.6726	32.0272		3.67327	43.9863		11.6731	32.0033		4.67396	45.388		12.6736	33.3871		5.67265	40.5566		13.6731	41.329		6.67264	34.6009		14.6734	52.5783		7.67258	41.5348		15.6731	38.0693
0.674779	102.037		8.67401	64.1945		1.67543	47.2788		9.67342	33.0143		2.67543	43.7179		10.6742	24.6877		3.67424	35.9579		11.6748	39.1281		4.67542	44.9197		12.6749	36.8287		5.67383	33.8523		13.6746	35.7103		6.67382	32.8145		14.675	49.5304		7.67376	28.2873		15.6746	37.0285
0.675821	91.6736		8.67499	75.8256		1.67619	39.5456		9.67481	33.4557		2.67655	44.2636		10.6757	32.9964		3.67514	32.4357		11.6764	36.444		4.67639	48.8952		12.6759	33.0561		5.6748	32.2329		13.6758	39.3935		6.67479	31.6872		14.6761	42.2625		7.67543	26.1192		15.6756	33.8762
0.676793	92.2731		8.67624	71.6861		1.67737	38.4362		9.67648	37.2343		2.67752	46.7062		10.6767	37.449		3.67674	44.7498		11.6774	28.7764		4.6775	51.3914		12.6771	32.0093		5.67626	41.5885		13.6768	38.5972		6.67625	35.2033		14.6771	46.7091		7.67689	37.8546		15.6768	33.7718
0.67846	95.8071		8.67797	69.7148		1.67904	45.2896		9.6778	42.3341		2.67905	55.9931		10.6779	37.8218		3.67834	41.7644		11.6785	32.7548		4.67924	52.7126		12.6789	30.3153		5.67807	37.3894		13.6783	29.1731		6.67799	42.1462		14.6786	44.7289		7.67786	30.8998		15.6784	26.5993
0.680126	83.9285		8.6795	60.9259		1.6805	48.1735		9.6787	41.2843		2.68078	44.5738		10.6795	42.6234		3.67945	36.1159		11.6801	32.5133		4.68091	49.6258		12.6804	27.831		5.67939	34.9797		13.6801	30.2497		6.67938	35.2689		14.6804	39.8349		7.67904	31.6245		15.68	31.9109
0.681237	96.3708		8.68047	71.0508		1.68154	48.6775		9.68002	42.9186		2.68203	43.0946		10.6812	33.6287		3.68049	34.5532		11.6817	34.2162		4.68195	49.2441		12.6814	38.8626		5.68029	28.4335		13.6813	33.0561		6.68035	37.1896		14.6816	53.7534		7.68071	46.2021		15.6812	33.9657
0.68221	86.7528		8.68158	75.7838		1.68265	52.2503		9.68176	41.3499		2.683	54.2007		10.6822	29.7457		3.68195	46.2678		11.6829	35.2093		4.68299	37.285		12.6825	38.3199		5.68161	34.762		13.6822	42.5577		6.6816	32.7906		14.6825	50.9649		7.6823	37.3953		15.6822	33.5362
0.683876	91.8376		8.68332	67.9135		1.68432	45.7787		9.68328	40.9324		2.68432	48.3971		10.6833	32.7877		3.68368	40.0943		11.6839	27.4135		4.68459	44.4187		12.6842	31.1056		5.68341	39.823		13.6837	37.0971		6.68334	40.3747		14.684	41.6541		7.68341	35.1497		15.6837	39.9989
0.685612	92.7413		8.68492	69.9325		1.68598	40.7147		9.68425	37.6816		2.68613	43.7865		10.6849	32.6266		3.685	33.8016		11.6853	26.8469		4.68632	49.4976		12.6859	31.7409		5.68487	35.2809		13.6855	29.1134		6.68486	46.1007		14.6858	36.3992		7.68439	33.5273		15.6855	38.9998
0.686654	81.7604		8.68596	70.6632		1.68703	42.5369		9.68544	32.1494		2.68759	44.0668		10.6866	39.2295		3.68591	41.4453		11.6871	27.5865		4.68743	41.7406		12.6869	32.6266		5.68577	37.7592		13.6868	41.004		6.68577	42.9633		14.6871	43.0051		7.68598	35.0214		15.6867	28.9524
0.687487	82.2107		8.687	61.9935		1.688	50.2581		9.68717	34.1595		2.68849	41.3648		10.6877	26.6023		3.68729	42.5458		11.6883	27.7445		4.68841	41.0189		12.688	30.9476		5.68702	34.0939		13.6877	42.9633		6.68695	36.5006		14.688	41.3439		7.68772	38.7105		15.6876	31.3204
0.688946	81.3637		8.68874	66.1151		1.68966	46.7598		9.68877	40.998		2.68974	34.2281		10.6887	27.3718		3.6891	46.0739		11.6892	34.7858		4.69	39.2325		12.6896	31.1325		5.6889	31.6991		13.6891	38.3407		6.68875	38.1886		14.6893	46.8463		7.6889	32.5968		15.6891	37.3118
0.690612	89.2132		8.6904	73.887		1.6914	43.1602		9.68974	46.6853		2.69155	40.5447		10.6903	32.4835		3.69049	41.8569		11.6907	37.0524		4.69181	37.8874		12.6913	32.2389		5.69036	26.5248		13.691	35.1437		6.69035	30.9326		14.6912	51.7701		7.6898	34.0701		15.6909	37.3894
0.691793	90.087		8.69137	76.3266		1.69251	51.4361		9.69078	42.2118		2.693	47.7828		10.692	33.6525		3.69139	46.7986		11.6926	28.7764		4.69285	40.6312		12.6923	33.6973		5.69119	31.0311		13.6922	34.5204		6.69118	30.7358		14.6925	41.5288		7.6914	30.6255		15.6921	36.0414
0.692765	98.5031		8.69228	66.306		1.69341	46.7718		9.69252	41.8629		2.69377	44.8034		10.6931	38.6986		3.69271	40.1778		11.6938	28.5677		4.69361	31.6544		12.6932	32.1852		5.6923	31.7826		13.693	34.577		6.69222	28.5468		14.6933	48.594		7.69321	30.0051		15.6929	34.2281
0.694223	99.8243		8.69381	68.6053		1.69501	53.1539		9.69419	40.148		2.69488	46.062		10.6939	35.2123		3.69452	43.4196		11.6946	21.7173		4.69507	33.7688		12.6948	30.6195		5.69397	37.5087		13.6942	37.3953		6.69382	26.8618		14.6945	41.678		7.69432	47.5621		15.6943	36.8108
0.69596	95.1808		8.69547	58.2746		1.69682	42.5756		9.69509	34.3534		2.69662	39.6858		10.6954	35.7402		3.69591	47.0789		11.6959	28.5856		4.69681	39.5814		12.6964	32.5491		5.6955	39.1191		13.696	39.8945		6.69535	43.9058		14.6962	42.6472		7.69515	48.3375		15.6959	37.6578
0.697348	101.763		8.69658	59.548		1.69786	47.5352		9.69599	37.8874		2.69807	42.4235		10.6971	34.2699		3.69674	38.8149		11.6976	33.6108		4.69799	45.0838		12.6976	27.1212		5.69654	32.8533		13.6973	38.5644		6.69646	40.6759		14.6977	38.1379		7.69654	40.4313		15.6972	33.0054
0.698321	100.048		8.69756	70.4305		1.69869	38.97		9.69759	41.7167		2.69912	52.2413		10.6983	32.3582		3.69785	30.6285		11.6989	26.8677		4.69896	42.5577		12.6985	28.6661		5.69758	31.2518		13.6983	34.6009		6.6975	35.8982		14.6986	36.5484		7.69828	43.6314		15.6982	33.6167
0.699571	86.0758		8.69908	70.514		1.70015	41.7227		9.69919	41.0278		2.70023	48.078		10.6992	37.8874		3.69952	38.4869		11.6999	32.0242		4.70035	44.9525		12.6999	31.3711		5.69925	35.5463		13.6995	29.3431		6.6991	31.1712		14.6998	40.4791		7.69953	37.4848		15.6995	39.6798
0.701307	84.6204		8.70082	74.236		1.70182	36.614		9.7003	38.8716		2.70182	46.4258		10.7006	37.2283		3.70097	45.6206		11.7012	39.1758		4.70209	47.8872		12.7017	37.0106		5.70098	36.9987		13.7012	32.9547		6.70077	34.7798		14.7015	47.1416		7.7005	37.3566		15.7013	36.0772
0.702835	91.3396		8.70214	68.2027		1.70307	44.3024		9.70127	37.3357		2.70349	42.513		10.7024	34.3921		3.70202	42.5398		11.7028	35.8714		4.70354	43.703		12.703	40.7296		5.70209	40.6341		13.7028	35.4449		6.70195	48.1377		14.7032	44.2398		7.70182	32.8562		15.7028	33.2529
0.703737	89.4428		8.70304	52.0624		1.70404	49.7362		9.7028	38.7612		2.7046	41.1829		10.7038	40.0943		3.7032	39.3637		11.7044	42.34		4.70452	49.4201		12.7039	27.3151		5.703	38.4749		13.7038	38.1678		6.70292	39.5695		14.7042	51.1528		7.70355	27.1153		15.7038	31.4814
0.704918	103.588		8.70436	58.0569		1.70536	47.2281		9.7046	36.8585		2.70564	43.8968		10.7048	31.6275		3.70479	44.6126		11.7054	44.705		4.7057	48.0422		12.7053	29.8202		5.70452	36.0563		13.7049	30.0767		6.70438	39.4263		14.7052	52.4233		7.70501	40.3359		15.7049	32.4328
0.706724	99.8869		8.70617	72.9655		1.70716	53.3239		9.70585	47.7172		2.70717	47.7828		10.706	35.6149		3.70646	34.747		11.7065	34.0074		4.7075	47.4756		12.7071	30.4257		5.70633	36.7154		13.7065	25.636		6.70618	41.2068		14.7068	45.713		7.70598	45.385		15.7066	40.4761
0.708251	97.5219		8.70756	77.2869		1.70855	52.4203		9.70682	45.1822		2.70891	41.3917		10.7077	36.8078		3.70757	41.4364		11.7082	33.9895		4.70903	48.7013		12.7085	34.4518		5.70751	31.1474		13.7082	31.7468		6.70743	37.6966		14.7086	47.0163		7.70716	35.9698		15.7082	36.4589
0.709085	96.7227		8.70853	81.0744		1.70953	38.7911		9.70814	38.0783		2.71009	44.5559		10.7092	31.544		3.70854	38.7255		11.7098	39.2146		4.71	46.3363		12.7094	32.6266		5.70848	40.4015		13.7093	34.0879		6.70833	35.1735		14.7097	41.0517		7.7089	32.558		15.7093	35.8147
0.710126	100.131		8.70978	67.3319		1.71071	43.8073		9.70995	45.8651		2.71106	41.7197		10.7102	40.5924		3.71014	37.2373		11.7109	31.9705		4.71118	44.8601		12.7107	29.1134		5.70994	37.3745		13.7103	37.2403		6.70979	37.115		14.7107	35.7073		7.7105	33.7659		15.7103	33.6406
0.711793	100.474		8.71158	61.1108		1.71251	50.9291		9.71134	38.8626		2.71259	41.7466		10.7114	39.7544		3.71188	31.9616		11.7119	35.8296		4.71292	40.2285		12.7125	40.7982		5.71175	34.5025		13.7119	35.2004		6.7116	41.2813		14.7123	41.8032		7.71147	35.3554		15.712	29.7457
0.713321	100.934		8.71304	63.267		1.71404	52.0117		9.71224	40.8489		2.71439	39.7782		10.7131	24.8219		3.71306	37.5325		11.7136	41.5497		4.71445	40.7266		12.7139	34.4249		5.71293	40.3896		13.7137	39.9482		6.71285	37.449		14.7141	40.819		7.71258	36.271		15.7137	24.5117
0.714362	99.4605		8.71381	59.3094		1.71501	46.2379		9.71356	36.0265		2.7155	38.0813		10.7147	21.4787		3.71403	30.7388		11.7153	38.7911		4.71535	40.6043		12.7148	37.7085		5.71369	38.135		13.7147	32.4685		6.71368	34.8633		14.7151	39.4263		7.71432	30.2408		15.7146	35.9012
0.715404	105.869		8.71492	69.1302		1.71612	44.6871		9.71537	33.7211		2.71634	41.1918		10.7156	29.3878		3.71556	30.6493		11.7163	45.4029		4.71639	49.9002		12.7159	38.7732		5.71508	43.9803		13.7156	31.3144		6.71493	40.6908		14.7159	47.1207		7.71591	34.5532		15.7156	40.4015
0.717001	104.378		8.71665	70.8809		1.71793	48.0959		9.71675	31.6216		2.71773	42.003		10.7166	28.7436		3.71729	45.7488		11.7171	38.4034		4.71799	41.7794		12.7176	36.1875		5.71675	41.6004		13.7171	32.901		6.71667	42.677		14.7174	44.6931		7.71682	35.3077		15.7171	40.2464
0.718737	88.0352		8.71811	60.6843		1.71946	40.2136		9.71759	29.6443		2.71939	44.4187		10.7182	34.4786		3.71847	35.9191		11.7187	32.9696		4.71959	44.3233		12.7191	34.7679		5.71807	39.9661		13.7187	35.8296		6.71799	38.8418		14.7191	48.5582		7.71779	34.2967		15.7188	32.8115
0.719918	83.35		8.71908	68.6232		1.72036	42.9454		9.7187	29.1492		2.72071	43.4554		10.7198	32.7936		3.71931	27.4195		11.7203	37.4788		4.72063	42.7874		12.7201	35.3674		5.71904	38.8		13.7199	34.7858		6.71896	38.4988		14.7202	47.067		7.71939	33.9925		15.7199	30.1274
0.720821	88.6346		8.72019	69.7028		1.7214	43.1244		9.72037	37.5743		2.72162	38.0127		10.7208	26.9065		3.7207	40.5327		11.7215	36.8138		4.72167	49.9599		12.7212	40.3568		5.72036	36.3336		13.7208	33.4587		6.72021	29.3878		14.7212	47.0968		7.72098	34.6486		15.7209	29.7636
0.722279	106.94		8.72186	80.6927		1.723	46.9239		9.72182	37.3059		2.72293	43.2109		10.7219	35.4121		3.72236	38.2036		11.7225	39.1788		4.7232	52.0773		12.7228	32.3821		5.72209	40.3389		13.7223	32.0421		6.72195	36.7452		14.7226	47.3802		7.72209	38.9879		15.7224	36.7631
0.724085	100.877		8.72353	64.8446		1.72453	42.0657		9.7228	46.9298		2.72474	42.5995		10.7234	33.6466		3.72361	34.9767		11.7239	37.8158		4.725	54.4184		12.7245	30.5569		5.72362	35.9131		13.724	30.5837		6.72354	32.8712		14.7244	45.3969		7.72307	34.6158		15.7241	36.444
0.725404	101.471		8.72464	67.3766		1.72564	48.7759		9.72398	42.2864		2.7262	43.6373		10.7252	37.2999		3.72459	36.3664		11.7257	32.8175		4.72618	46.5988		12.7256	31.5112		5.72459	34.2162		13.7254	32.4328		6.72452	34.413		14.7258	45.2329		7.72466	32.9905		15.7254	35.3853
0.726237	102.031		8.72561	80.9522		1.72668	51.6837		9.72564	41.1232		2.7271	37.5504		10.7264	32.3075		3.72591	33.6227		11.727	28.678		4.72709	50.3267		12.7266	33.3722		5.72571	27.503		13.7264	26.6918		6.72556	34.1386		14.7268	42.7277		7.7264	37.8397		15.7263	40.3478
0.727696	108.518		8.72721	87.0719		1.72821	50.276		9.72731	36.9062		2.72828	38.6211		10.7273	35.0214		3.72764	44.6155		11.7279	39.7723		4.72854	43.8252		12.7281	37.6339		5.72744	34.4876		13.7276	33.1634		6.72729	32.063		14.728	37.3685		7.72765	37.4788		15.7277	37.4938
0.729501	92.622		8.72894	80.6241		1.72994	48.8266		9.72835	53.1778		2.73002	42.9783		10.7288	41.1143		3.7291	40.1421		11.7292	37.798		4.73042	40.6163		12.7299	42.2357		5.72904	42.9007		13.7294	25.9283		6.72896	35.4986		14.7298	39.7693		7.72855	40.1331		15.7295	32.1614
0.730751	97.2028		8.73012	73.1534		1.73112	45.6474		9.72939	44.8422		2.73162	33.9209		10.7305	30.038		3.73007	38.9909		11.731	34.4369		4.73174	49.2024		12.7311	36.5126		5.73008	45.0748		13.7309	31.2935		6.73	41.162		14.7313	47.4279		7.72994	37.6369		15.7309	29.2447
0.731585	91.2203		8.73103	72.5748		1.73203	44.9704		9.73099	42.2506		2.73259	34.6218		10.7318	31.0579		3.73125	43.6165		11.7324	38.8746		4.73257	48.4717		12.732	30.029		5.73112	37.0017		13.7318	35.6835		6.73104	39.0147		14.7323	45.8502		7.73175	32.3135		15.7318	28.2336
0.732834	84.1015		8.73263	77.4181		1.73348	43.5091		9.73273	34.6456		2.7337	46.2021		10.7327	31.6872		3.73299	33.6764		11.7334	29.9992		4.73396	37.5504		12.7335	32.4238		5.73286	36.5335		13.7331	40.1421		6.73278	33.1724		14.7334	41.2992		7.73307	34.7381		15.7331	28.2307
0.734501	84.9216		8.73436	85.6195		1.73529	31.72		9.73384	33.2947		2.73544	49.6885		10.7341	28.6243		3.73459	39.0416		11.7346	28.338		4.73584	36.9361		12.7353	32.3075		5.73452	35.3703		13.7349	42.182		6.73445	31.5649		14.7352	47.0551		7.73397	44.8989		15.735	35.5046
0.73589	93.5823		8.73554	70.9673		1.73661	37.7711		9.73474	42.8023		2.73703	46.8076		10.7359	33.9001		3.73556	33.1843		11.7364	28.5856		4.73709	42.51		12.7364	34.3176		5.73543	32.0152		13.7363	35.7163		6.73542	29.686		14.7368	50.2163		7.73536	45.4267		15.7363	34.4279
0.736862	96.3857		8.73637	72.2438		1.73751	28.4394		9.73634	36.3754		2.73793	43.1095		10.7372	32.3761		3.73667	45.3373		11.7379	27.4732		4.73785	40.0287		12.7373	26.5188		5.73633	35.7491		13.7371	38.3974		6.73632	31.1056		14.7376	44.532		7.73723	34.4906		15.7371	31.4605
0.738043	94.5009		8.73776	82.6402		1.7389	34.8574		9.73814	32.2001		2.73891	50.1835		10.738	25.0962		3.73841	43.6165		11.7387	36.3694		4.7391	42.9842		12.7387	21.6397		5.73793	34.0194		13.7382	35.3674		6.73785	34.076		14.7386	46.9984		7.73855	34.9647		15.7383	39.2981
0.73971	82.3688		8.73943	72.7329		1.74071	35.9787		9.73919	31.7468		2.7405	47.0133		10.7392	24.7354		3.74007	38.4749		11.7398	34.1595		4.74084	42.2685		12.7403	27.0318		5.73953	36.4768		13.7399	30.8163		6.73952	37.1896		14.7402	42.4056		7.73932	31.9109		15.74	31.049
0.741307	82.3539		8.74075	81.5874		1.74203	39.9005		9.74002	35.4002		2.7421	44.2428		10.741	32.5968		3.74097	38.4779		11.7414	31.3979		4.74222	38.1857		12.7416	30.2557		5.74071	38.4183		13.7415	35.7938		6.7407	34.085		14.7418	39.0863		7.74057	30.7328		15.7414	34.5114
0.742349	79.8666		8.74172	83.8003		1.74279	41.0368		9.74148	34.8812		2.74321	50.2372		10.7424	42.5995		3.74195	42.7486		11.743	28.4126		4.7432	41.8479		12.7426	36.7571		5.74168	27.5835		13.7425	35.2361		6.74167	37.2134		14.7429	42.0806		7.74223	36.9927		15.7424	32.5163
0.743459	90.8684		8.74297	75.0621		1.74404	52.1757		9.74314	40.998		2.74418	44.0757		10.7433	33.0412		3.74354	40.6848		11.744	37.3208		4.74438	37.0911		12.7439	34.1237		5.74321	38.9849		13.7435	32.9427		6.74313	38.132		14.7439	42.7784		7.74369	36.5663		15.7436	37.0613
0.745126	79.6489		8.74471	73.9258		1.74571	40.4761		9.74439	39.3279		2.74571	37.1299		10.7445	34.1029		3.74507	45.6355		11.7451	36.7392		4.74604	40.3926		12.7456	36.2919		5.74494	35.9221		13.7451	36.7392		6.74493	39.8319		14.7455	35.9877		7.74466	31.7737		15.7452	35.099
0.746793	91.8824		8.74624	76.9887		1.74716	40.3806		9.74537	42.9902		2.74752	37.449		10.7462	43.1154		3.74618	35.3823		11.7467	34.2222		4.74771	39.7931		12.7471	39.1996		5.74626	38.4123		13.7468	24.6012		6.74625	41.5557		14.7472	39.146		7.74584	28.168		15.7469	31.0967
0.747835	90.5493		8.74714	80.3169		1.74814	47.5173		9.74669	45.1285		2.74877	38.3646		10.7478	32.3135		3.74722	40.5268		11.7484	37.4222		4.74875	44.2428		12.748	36.9569		5.74716	37.109		13.748	25.4154		6.74715	37.6995		14.7484	44.3442		7.74751	29.1701		15.748	39.2086
0.748876	99.4455		8.74832	79.3119		1.74932	49.098		9.74849	42.1104		2.74967	40.7683		10.7488	27.7952		3.74875	39.8766		11.7495	41.3111		4.74979	47.4995		12.7492	31.5977		5.74855	30.4316		13.749	32.1554		6.74847	42.349		14.7493	48.9399		7.74911	33.3901		15.749	36.608
0.750543	99.3173		8.75012	78.3456		1.75098	44.869		9.74995	34.6993		2.75106	39.5009		10.7499	30.8939		3.75049	35.8654		11.7505	34.2192		4.75146	44.7229		12.751	37.4311		5.75036	34.6158		13.7504	31.3412		6.75028	39.641		14.7508	48.7162		7.75015	34.8633		15.7506	33.2947
0.75221	98.4912		8.75172	70.9047		1.75258	50.6339		9.75085	42.2446		2.75287	46.1932		10.7515	32.221		3.75174	44.5201		11.752	31.3711		4.75313	45.1196		12.7526	44.1145		5.75175	39.9691		13.7522	29.0836		6.75174	28.517		14.7526	39.6112		7.75119	35.5761		15.7523	35.0274
0.753251	95.6938		8.75269	81.8528		1.75362	47.0879		9.75203	43.1751		2.75418	50.0464		10.7532	35.1974		3.75264	43.0349		11.7538	32.1465		4.75424	44.6543		12.7535	30.3869		5.75265	41.2515		13.7535	33.8464		6.75264	33.1366		14.7539	51.9043		7.75286	32.9845		15.7535	36.5752
0.754084	87.6952		8.75381	80.8269		1.75466	38.293		9.75384	33.6227		2.75509	45.8055		10.7543	43.7715		3.75403	40.0824		11.755	41.2068		4.75521	46.6853		12.7546	33.7718		5.75397	34.4757		13.7544	39.4024		6.75389	31.7975		14.7548	42.5458		7.75459	38.0008		15.7545	37.0226
0.755612	86.6424		8.75554	74.9458		1.75633	35.1019		9.75537	32.8205		2.75641	42.4146		10.7553	42.7277		3.75584	38.4242		11.7559	31.714		4.75688	46.6256		12.7563	35.0333		5.75577	32.6266		13.7558	34.6218		6.7557	27.4672		14.7562	41.8897		7.75564	41.332		15.756	32.3821
0.75721	90.5403		8.75721	79.5773		1.758	41.3857		9.75634	38.7732		2.75828	43.7328		10.7569	40.5596		3.75722	40.7296		11.7574	29.2536		4.75861	52.2056		12.758	27.3032		5.75716	33.4766		13.7577	33.7062		6.75715	28.8599		14.7581	36.0145		7.75661	35.5552		15.7578	30.3511
0.75839	93.7612		8.75804	69.6581		1.75911	46.6346		9.75745	37.4431		2.75967	37.1538		10.7587	36.2143		3.75813	38.9402		11.7592	35.4598		4.75959	46.223		12.7589	29.7636		5.758	35.5195		13.759	32.8175		6.75799	40.4105		14.7593	33.8911		7.75828	28.5856		15.7589	33.8822
0.759432	98.2347		8.75901	67.9641		1.76008	43.9117		9.75926	30.9684		2.76044	39.5367		10.7597	36.2322		3.75945	39.1639		11.7604	28.6213		4.76049	46.739		12.7598	32.8175		5.75911	30.6314		13.7597	30.1572		6.7591	42.7098		14.7601	35.4509		7.76001	38.5674		15.7597	32.8205
0.760821	101.709		8.76061	64.7611		1.76175	51.6091		9.76085	32.0093		2.76162	40.9324		10.7606	32.4924		3.76132	41.4245		11.7612	23.4261		4.76195	46.8165		12.7614	35.2779		5.76077	27.0079		13.761	31.8035		6.76077	35.6149		14.7614	37.1925		7.76105	43.4047		15.7611	36.0622
0.762557	102.875		8.76221	65.6111		1.76348	56.4315		9.76169	29.2476		2.76328	39.4502		10.762	35.0125		3.76271	36.9659		11.7626	26.4204		4.76361	47.1237		12.763	41.4931		5.76223	32.8205		13.7627	31.9705		6.76229	37.7204		14.7631	41.4006		7.76196	39.7752		15.7628	34.0551
0.763946	83.0786		8.76332	77.1885		1.76453	49.2739		9.76266	40.834		2.76474	38.2185		10.7637	37.8815		3.76347	33.5601		11.7642	38.8805		4.76479	48.9727		12.7642	40.1719		5.76327	34.6397		13.764	33.5571		6.76333	48.257		14.7644	41.332		7.76341	38.8776		15.7641	34.3623
0.764918	78.1488		8.76429	83.3708		1.76536	43.4405		9.76432	46.5988		2.76578	36.7422		10.7649	36.277		3.76466	41.0636		11.7655	38.0455		4.76577	49.9569		12.7652	39.8438		5.76439	30.8074		13.765	36.0533		6.76438	41.836		14.7654	42.7009		7.76508	36.0175		15.765	33.1306
0.766168	92.0434		8.76582	78.6528		1.76682	43.3689		9.76585	45.4417		2.76689	39.9333		10.7658	25.0068		3.76632	46.3662		11.7665	37.5922		4.76716	48.4329		12.7666	37.0375		5.76605	34.4697		13.7662	29.1164		6.76597	32.1256		14.7666	41.6601		7.76633	27.2674		15.7663	31.3979
0.767973	92.449		8.76762	81.4114		1.76848	41.9136		9.76696	37.9471		2.76856	37.7413		10.7672	34.7351		3.76771	46.8225		11.7678	32.1822		4.76896	42.9902		12.7685	29.8441		5.76772	37.2552		13.768	26.489		6.76771	32.2986		14.7683	46.2827		7.7673	30.7299		15.7681	29.9902
0.769432	95.3747		8.76888	86.5768		1.76966	44.541		9.76801	36.1457		2.77023	36.444		10.769	38.4034		3.76875	32.8652		11.7696	33.2618		4.77035	43.6851		12.7697	37.7532		5.76883	35.0811		13.7695	29.4325		6.76882	32.8652		14.7699	48.1347		7.76862	29.2745		15.7696	33.4706
0.770404	90.3047		8.76978	71.6712		1.77064	41.3022		9.76953	45.889		2.77127	32.9517		10.7704	28.335		3.76986	36.9033		11.7711	32.9905		4.77132	42.9365		12.7706	37.458		5.76987	35.0483		13.7705	34.7858		6.76979	33.1426		14.7709	41.332		7.77043	33.4736		15.7705	35.3793
0.771654	84.9783		8.77117	83.7496		1.77209	39.143		9.77127	40.2524		2.77231	37.4997		10.7714	39.14		3.77153	46.7658		11.7721	41.6302		4.77257	48.8326		12.772	36.2472		5.7714	38.7105		13.7716	39.647		6.77132	29.6413		14.772	42.1164		7.77182	39.2563		15.7717	32.5043
0.77339	95.5685		8.77297	77.0841		1.77383	40.0914		9.77252	31.8602		2.77391	27.837		10.7726	42.5876		3.7732	38.6658		11.7732	37.956		4.77431	44.6275		12.7738	44.2994		5.77314	29.0836		13.7733	34.7858		6.77313	31.7588		14.7737	38.2781		7.77279	36.0533		15.7735	36.3873
0.774849	90.7789		8.77429	73.7588		1.77522	47.0879		9.77342	31.1712		2.77564	33.581		10.7744	31.7528		3.77424	38.6121		11.7749	26.9393		4.77584	48.09		12.7752	32.6564		5.77432	27.3867		13.775	26.3548		6.77431	33.5481		14.7754	44.1414		7.77404	29.0389		15.7751	33.8762
0.775682	90.3345		8.77519	75.7927		1.77619	47.8812		9.77488	33.8702		2.77675	39.8289		10.7759	30.7686		3.77528	40.7862		11.7765	26.8021		4.77674	52.292		12.7761	32.215		5.77529	36.2949		13.776	31.4903		6.77521	32.9517		14.7765	49.1039		7.77577	35.9459		15.7761	35.8117
0.776793	89.7202		8.77658	79.3208		1.77744	41.0904		9.77662	35.087		2.77773	39.2623		10.7768	32.9338		3.77688	29.3908		11.7776	32.1196		4.77799	41.9792		12.7774	28.5438		5.77682	40.8519		13.777	33.6018		6.77674	38.4571		14.7775	42.4086		7.7773	35.2481		15.7772	37.0762
0.77839	91.1696		8.77839	76.929		1.77918	47.6993		9.77794	36.0414		2.77932	31.887		10.7781	38.6718		3.77861	38.9521		11.7786	36.5036		4.77979	43.6016		12.7792	38.135		5.77862	46.22		13.7787	33.1306		6.77854	39.9244		14.7791	43.5837		7.77828	30.6434		15.7789	34.7739
0.779918	93.2214		8.77978	63.3505		1.78071	46.9626		9.77884	35.1616		2.78106	40.3628		10.7799	34.5472		3.77979	42.8918		11.7803	34.7679		4.78125	53.0853		12.7806	35.9549		5.77973	40.6789		13.7805	27.7028		6.77972	35.8117		14.7809	42.6174		7.77946	35.099		15.7805	29.2685
0.78096	97.8828		8.78054	55.2028		1.78161	46.4855		9.78023	38.0455		2.78217	47.0223		10.7813	31.9109		3.78077	36.9778		11.782	33.4825		4.78209	55.2445		12.7814	39.823		5.7805	33.5869		13.7815	25.973		6.78049	37.5594		14.7818	43.181		7.78126	26.2713		15.7814	36.1636
0.782071	94.3726		8.78172	56.6254		1.78279	48.4538		9.7821	41.6392		2.78294	38.4958		10.7822	34.917		3.78236	47.577		11.7829	33.1813		4.78313	47.4726		12.7826	39.9065		5.78196	32.9069		13.7823	35.254		6.78188	33.6018		14.7827	36.2978		7.78286	27.5477		15.7824	32.9248
0.783668	95.0019		8.78346	58.3402		1.78459	49.4022		9.78342	38.9551		2.78439	47.0521		10.7832	33.566		3.78417	38.1409		11.7838	35.8028		4.78479	39.0207		12.7843	33.0292		5.78362	39.1549		13.7838	31.0698		6.78354	31.0758		14.7842	35.7044		7.78369	32.0659		15.784	26.9065
0.785334	85.8372		8.78492	68.4652		1.78619	41.7615		9.78419	33.0561		2.78613	47.7619		10.7849	34.4041		3.78521	41.7883		11.7854	31.1861		4.78639	48.4627		12.7857	27.8459		5.78487	43.5807		13.7855	23.3039		6.78486	35.2182		14.7859	36.1159		7.78473	33.6824		15.7856	34.8902
0.786515	81.0357		8.78589	74.9309		1.78703	44.1652		9.78544	37.9709		2.78738	37.8009		10.7864	29.6294		3.78597	39.9989		11.787	33.1217		4.78736	40.0049		12.7867	32.6713		5.78584	33.9657		13.7867	35.9519		6.7859	37.2492		14.787	32.2598		7.7864	34.9528		15.7867	44.034
0.787487	103.552		8.78707	85.0737		1.788	44.207		9.7871	40.5656		2.78835	42.7725		10.7874	34.5323		3.78743	40.0973		11.7882	29.8053		4.78841	45.2955		12.7878	32.2091		5.78716	35.4807		13.7876	47.7947		6.78715	37.9351		14.788	38.7284		7.78793	37.7264		15.7877	34.8246
0.788946	111.285		8.78874	76.5204		1.78966	36.9062		9.78856	40.5924		2.78967	44.4187		10.7885	35.4628		3.78917	41.6332		11.7892	31.38		4.79	54.15		12.7896	26.7216		5.78897	34.8186		13.789	36.0175		6.78889	39.7365		14.7895	41.9523		7.78897	29.7188		15.7892	36.9957
0.790751	98.6552		8.79033	74.8145		1.79126	45.4715		9.78953	38.0962		2.79141	40.16		10.7901	31.1653		3.79035	41.0875		11.7906	30.7686		4.79174	48.925		12.7912	35.2958		5.79043	36.0235		13.7908	32.3314		6.79042	36.7243		14.7912	42.2058		7.79001	34.0909		15.791	32.892
0.792001	79.2015		8.79138	73.4576		1.7923	52.7931		9.79071	38.0157		2.79287	45.725		10.7918	29.9276		3.79132	38.9312		11.7923	31.6424		4.79292	48.2749		12.7923	28.1084		5.7914	36.7691		13.7921	31.7051		6.79139	33.566		14.7926	44.371		7.79161	37.8516		15.7922	25.1678
0.792904	93.2035		8.79242	73.9616		1.79334	50.2909		9.79238	38.4541		2.79377	45.2955		10.793	31.1056		3.79271	37.0345		11.7937	32.6624		4.79389	53.5506		12.7932	32.8622		5.79258	35.0363		13.793	34.0432		6.7925	38.0544		14.7935	46.0679		7.79334	30.032		15.7931	41.1859
0.794432	102.854		8.79401	62.4558		1.79494	45.7458		9.79398	31.2816		2.79495	40.9473		10.794	38.3228		3.79445	30.6553		11.7946	37.3476		4.79535	53.8071		12.7948	39.7991		5.79432	23.7005		13.7944	28.0875		6.79424	38.3199		14.7948	49.1845		7.79453	25.9045		15.7945	35.8505
0.796237	95.3001		8.79575	65.4739		1.79661	49.0324		9.79502	36.1845		2.79675	39.978		10.7954	34.3564		3.79584	30.023		11.796	40.3419		4.79716	44.362		12.7966	45.4357		5.79591	24.0077		13.7962	30.7448		6.7959	31.0997		14.7966	35.433		7.79543	38.1051		15.7963	41.159
0.797418	78.2502		8.79693	66.8189		1.79779	41.0845		9.79606	42.0269		2.79828	36.104		10.7972	33.402		3.79681	30.867		11.7978	38.8328		4.79841	40.3747		12.7977	39.1579		5.79689	35.1288		13.7976	34.9886		6.79695	36.7064		14.7981	35.5165		7.79696	34.5263		15.7977	39.811
0.798182	79.0375		8.79783	70.7258		1.79876	41.6601		9.79773	32.8861		2.79925	40.4701		10.7985	33.5392		3.79806	34.2878		11.7992	32.737		4.79931	44.9078		12.7986	36.0115		5.798	40.825		13.7985	28.8898		6.79799	37.3387		14.799	41.6302		7.79876	31.6067		15.7986	32.2479
0.799501	90.4628		8.79943	67.3289		1.80022	46.6197		9.79946	35.5165		2.80037	34.8842		10.7994	35.3286		3.79979	38.9104		11.8001	35.1288		4.80077	51.3466		12.8002	34.6307		5.79973	39.2086		13.7998	40.989		6.79972	27.5895		14.8002	47.4845		7.80001	36.7184		15.8	44.6722
0.801237	81.4711		8.80124	57.4992		1.80203	42.677		9.8005	36.3456		2.80217	35.8117		10.8008	31.6275		3.80132	35.8803		11.8014	37.6816		4.80257	45.8443		12.802	32.1017		5.80133	34.5681		13.8016	41.672		6.80139	25.9432		14.802	35.758		7.80091	30.9804		15.8018	33.7778
0.802557	82.6461		8.80228	55.85		1.80328	44.0042		9.80148	39.0058		2.8037	42.3758		10.8026	30.5002		3.80229	41.7734		11.8032	41.6064		4.80382	40.1212		12.8031	26.7693		5.80223	41.5169		13.8031	38.3586		6.80229	33.5571		14.8035	34.3295		7.80237	42.51		15.8031	32.0391
0.803529	85.1871		8.80311	56.2049		1.80418	43.8252		9.80314	35.8744		2.8046	47.8573		10.8038	36.4887		3.80341	37.0911		11.8046	43.354		4.80466	44.8571		12.8039	32.2061		5.80321	38.6867		13.8039	28.6452		6.80327	28.6601		14.8043	50.3863		7.80418	43.8968		15.8039	35.8386
0.804779	84.1522		8.80457	53.473		1.80564	54.7763		9.80488	44.872		2.80564	36.0115		10.8047	34.3653		3.80521	38.8		11.8054	37.6787		4.80591	47.6337		12.8053	30.2706		5.8048	35.2421		13.805	40.2345		6.80479	29.9336		14.8054	43.9505		7.80543	36.7541		15.8052	33.6167
0.806446	94.4621		8.80631	60.395		1.80744	36.274		9.80592	39.4293		2.80724	41.7048		10.8059	38.3288		3.80681	36.9719		11.8065	40.9443		4.80764	47.6963		12.807	28.8152		5.8064	34.923		13.8067	32.394		6.80646	38.9402		14.807	42.6084		7.80626	32.8562		15.8068	45.6355
0.808043	101.59		8.80749	56.685		1.80869	37.4371		9.80676	38.9014		2.80877	39.3965		10.8076	37.0106		3.80764	39.483		11.8082	36.6348		4.80896	47.5979		12.8083	31.9824		5.80751	33.4736		13.8082	29.9336		6.80764	39.4263		14.8086	42.8918		7.80751	35.767		15.8082	47.7559
0.809015	88.9448		8.80846	61.2688		1.80946	37.3625		9.80828	37.0524		2.80988	42.5876		10.809	32.8354		3.80868	36.4738		11.8097	32.6624		4.80993	47.0581		12.8092	33.4617		5.80848	40.2345		13.8092	26.6023		6.80861	37.5743		14.8096	38.806		7.80925	35.3375		15.8093	38.6151
0.810126	91.5991		8.80978	58.4476		1.81078	40.4373		9.80988	32.0152		2.81092	47.3503		10.81	35.427		3.81028	48.6536		11.8107	37.0136		4.81118	45.6802		12.8106	34.4757		5.81001	31.4098		13.8103	25.2185		6.81007	32.4477		14.8107	43.6254		7.81057	30.0409		15.8104	34.5621
0.811862	84.5995		8.81158	55.5905		1.81251	35.421		9.81113	37.8516		2.81245	43.4823		10.8112	39.5754		3.81188	51.3317		11.8118	38.3944		4.81292	46.6883		12.8123	35.093		5.81182	30.542		13.8119	32.2389		6.81181	29.6801		14.8123	37.8248		7.81154	30.4107		15.8121	42.0209
0.813529	96.669		8.81304	63.1835		1.81383	34.0581		9.8121	37.0882		2.81425	53.3031		10.8129	41.5736		3.81292	45.0689		11.8135	35.0542		4.81445	39.2533		12.8138	36.2561		5.81307	28.4215		13.8136	36.4947		6.81313	31.7528		14.814	37.9262		7.81279	30.0588		15.8137	42.0955
0.814501	102.923		8.81394	63.273		1.8148	37.1627		9.81342	35.0542		2.81544	46.7539		10.8145	33.9239		3.81396	40.0287		11.8151	28.5349		4.81549	41.3797		12.8148	43.8789		5.81397	36.6736		13.8147	31.9675		6.81403	35.9937		14.8152	41.6094		7.81446	36.101		15.8147	45.9427
0.815543	84.2178		8.81512	61.3374		1.81605	35.4449		9.81523	41.0427		2.81634	40.0108		10.8155	33.9269		3.81549	44.1205		11.8162	33.7927		4.81653	44.3173		12.816	36.5842		5.81536	40.7922		13.8157	35.7223		6.81542	36.2442		14.8161	40.488		7.81605	39.7096		15.8158	42.3997
0.817279	80.4899		8.81693	52.6529		1.81779	47.0312		9.81662	47.4756		2.8178	37.6041		10.8166	31.9258		3.81722	41.4781		11.8173	37.4371		4.81827	49.7094		12.8177	35.5463		5.81716	28.845		13.8172	44.9078		6.81722	31.8631		14.8176	39.9989		7.81709	39.9572		15.8175	35.1019
0.818876	90.2302		8.81846	68.2266		1.81939	47.6277		9.81759	36.8287		2.8196	42.856		10.8183	36.4649		3.81848	31.5828		11.8188	32.5222		4.81993	46.39		12.8192	38.8656		5.81855	28.9434		13.819	30.7686		6.81861	39.1012		14.8194	40.9861		7.81814	38.5048		15.8192	39.5933
0.819848	91.0473		8.81943	63.7442		1.82036	44.2428		9.81877	35.3674		2.82092	40.0317		10.8199	26.9423		3.81938	33.5273		11.8205	40.7743		4.82097	45.0569		12.8202	30.873		5.81946	30.1006		13.8202	32.7906		6.81952	29.4773		14.8207	43.1393		7.8198	35.937		15.8203	42.8709
0.820751	86.3889		8.82054	59.5301		1.8214	44.2517		9.82057	39.5993		2.82175	38.4988		10.821	35.1974		3.82084	39.8498		11.8217	39.9959		4.82195	50.1865		12.8214	30.023		5.82084	35.5314		13.8211	37.3536		6.82083	24.6191		14.8216	41.1411		7.82147	34.1357		15.8213	35.1705
0.822348	80.3259		8.82235	65.3934		1.82314	44.3173		9.8221	38.5584		2.82321	47.3145		10.822	39.8349		3.82264	42.5995		11.8226	32.4298		4.82368	52.7066		12.8231	33.4945		5.82265	35.2421		13.8226	32.0689		6.82264	25.0426		14.823	32.9994		7.82251	30.4495		15.8229	25.7225
0.823946	79.7443		8.82394	64.6836		1.8248	37.3655		9.823	41.3678		2.82509	39.3995		10.8237	32.2508		3.82396	46.4527		11.8242	34.1983		4.82535	47.6337		12.8247	34.0492		5.82397	39.7216		13.8244	24.0584		6.82403	28.4007		14.8248	36.5961		7.82355	33.6108		15.8246	27.8609
0.825057	87.2687		8.82485	64.6389		1.82584	45.2746		9.82425	37.5027		2.82634	40.7147		10.8253	34.592		3.82479	40.4791		11.826	30.0409		4.82632	40.7862		12.8256	29.4325		5.82473	37.8725		13.8256	43.533		6.82486	35.8475		14.8261	35.7849		7.82522	43.3272		15.8257	37.2701
0.826099	95.8876		8.82582	68.6203		1.82682	46.5004		9.82606	38.8269		2.8271	43.4584		10.8263	37.9918		3.82625	38.8805		11.8271	30.2139		4.82722	38.8269		12.8266	37.0255		5.82598	32.9308		13.8264	36.0384		6.82597	36.614		14.8269	39.641		7.82696	47.2967		15.8265	39.5367
0.827557	83.0368		8.82742	75.8673		1.82848	44.5022		9.82759	35.3167		2.82835	36.7661		10.8272	35.4419		3.82806	44.9585		11.8279	33.9239		4.82875	36.3635		12.8282	40.6729		5.82765	31.043		13.8278	41.7704		6.82764	35.266		14.8282	50.7502		7.82793	41.0427		15.828	37.4252
0.829293	80.5883		8.82901	69.7028		1.83022	44.2189		9.82842	35.7282		2.83009	46.0739		10.8288	38.2185		3.82938	40.822		11.8293	39.7007		4.83042	39.5068		12.8298	39.2474		5.82911	33.578		13.8294	34.8753		6.8291	33.5601		14.8299	52.9601		7.82876	39.0297		15.8297	32.8652
0.830612	85.1364		8.83006	68.662		1.83119	41.1889		9.82946	29.7755		2.83148	49.3187		10.8304	50.2879		3.83014	41.5587		11.831	32.3701		4.83153	42.4563		12.8309	37.5683		5.83008	37.121		13.8308	39.7603		6.83014	31.2011		14.8312	46.8374		7.83029	33.2976		15.8309	30.9505
0.831515	85.6165		8.8311	71.9933		1.83203	49.596		9.83106	34.5174		2.83245	46.6912		10.8315	40.4582		3.83139	42.179		11.8323	34.4965		4.8325	43.521		12.8319	34.2788		5.83126	41.2276		13.8317	43.0677		6.83132	37.0136		14.8321	41.1948		7.83196	46.229		15.8318	42.2297
0.832835	93.2423		8.83263	68.7246		1.83355	51.791		9.83259	41.6601		2.83363	42.9454		10.8325	49.0145		3.83313	41.496		11.8332	38.97		4.83396	52.9929		12.8334	39.1221		5.83293	39.6798		13.8331	39.2474		6.83292	38.9133		14.8334	44.9854		7.83314	37.2432		15.8332	38.0544
0.83464	76.2938		8.83436	73.6634		1.83522	57.2308		9.83363	43.7328		2.8353	35.6507		10.834	42.5697		3.83452	43.8044		11.8346	40.6043		4.8357	58.3193		12.8351	35.6149		5.83459	40.8578		13.8348	36.8824		6.83458	30.5658		14.8352	47.3742		7.83411	43.5359		15.835	29.5339
0.836099	74.8474		8.83561	67.1679		1.8364	46.0262		9.83467	37.9113		2.83689	43.2586		10.8357	35.603		3.83549	49.0711		11.8363	44.3322		4.83709	41.9136		12.8364	38.4779		5.83564	35.3674		13.8362	35.2958		6.8357	37.4729		14.8367	47.3503		7.83557	47.0074		15.8364	41.7734
0.837001	85.5151		8.83651	74.8056		1.83737	44.5947		9.83627	37.7711		2.83793	46.5063		10.8371	33.1545		3.83667	50.0941		11.8378	40.2017		4.83799	51.964		12.8373	41.9285		5.83661	41.9315		13.8372	40.4731		6.83667	44.6991		14.8377	45.1971		7.8373	41.836		15.8373	42.6234
0.838251	92.5266		8.83797	76.3773		1.83883	34.7202		9.83801	48.3345		2.83898	52.8736		10.838	32.0063		3.83834	51.6151		11.8387	44.3829		4.83931	48.6536		12.8387	38.7463		5.83827	40.4582		13.8384	34.9976		6.83827	37.3178		14.8388	46.4765		7.83869	38.0872		15.8386	42.1134
0.840057	85.7626		8.83978	70.1293		1.84057	42.2923		9.83912	47.6307		2.84064	60.4457		10.8393	40.9145		3.83993	43.02		11.8399	40.4105		4.84111	55.674		12.8405	36.3485		5.84001	36.0772		13.8401	35.8207		6.84	37.5832		14.8405	52.7961		7.83959	44.0221		15.8404	45.6594
0.841515	91.7273		8.84103	63.6607		1.84196	48.2033		9.84009	42.1671		2.84231	61.57		10.8411	38.5167		3.84097	41.4364		11.8417	43.5509		4.8425	58.2925		12.8418	44.04		5.84112	46.1216		13.8417	37.449		6.84118	44.7796		14.8421	46.0292		7.84091	44.4217		15.8419	46.9537
0.842279	91.4082		8.842	65.9809		1.84286	52.6887		9.84162	52.4113		2.84342	55.498		10.8426	40.1719		3.84202	44.6603		11.8432	43.7417		4.84347	65.9362		12.8427	44.4127		5.84209	48.1078		13.8427	37.4938		6.84215	43.0737		14.8432	42.2535		7.84272	44.9376		15.8429	41.0815
0.84346	84.3103		8.84339	60.3175		1.84411	61.4508		9.84342	49.1994		2.84439	53.1181		10.8435	45.4476		3.84368	51.281		11.8442	51.797		4.84472	61.0839		12.8441	46.8821		5.84369	42.9753		13.8437	41.9165		6.84368	42.4176		14.8442	52.2443		7.84411	48.4389		15.844	42.5428
0.845126	81.9244		8.84519	64.0901		1.84591	57.1473		9.84467	51.5793		2.84606	58.8472		10.8447	44.9734		3.84535	58.4893		11.8453	60.1952		4.84653	64.6657		12.846	39.7514		5.8455	47.917		13.8455	52.2443		6.84542	51.0454		14.8459	49.7362		7.84508	53.7444		15.8458	47.7172
0.846584	79.8487		8.84651	75.3603		1.84737	60.8066		9.84557	61.4597		2.84773	65.8288		10.8465	46.5928		3.84646	66.0256		11.847	55.343		4.84799	67.5794		12.8473	59.8105		5.84654	47.5651		13.8471	52.799		6.8466	49.3097		14.8476	49.3067		7.84633	48.5343		15.8474	50.0493
0.847626	97.3341		8.84735	75.2589		1.84828	57.8869		9.84703	63.3594		2.84877	63.6428		10.848	50.8605		3.84743	58.1672		11.8487	55.1402		4.84882	64.0126		12.848	56.3629		5.84737	50.7949		13.8481	47.3205		6.84743	42.6591		14.8486	51.624		7.84814	53.1271		15.8482	61.4418
0.848737	96.7644		8.8486	82.1421		1.84953	57.0518		9.84884	59.5003		2.84967	63.0523		10.8488	56.4792		3.8491	54.32		11.8495	60.1922		4.84993	65.0504		12.8492	57.2009		5.84883	52.6976		13.849	52.8169		6.84882	47.574		14.8495	50.0314		7.84959	48.8266		15.8492	65.4411
0.850335	93.9104		8.85026	90.2003		1.85133	60.9289		9.85009	63.8515		2.85113	71.1791		10.8499	61.9965		3.85084	67.1649		11.8505	52.0117		4.8516	63.5831		12.8509	61.8623		5.8505	46.4735		13.8506	58.6593		6.85049	49.0055		14.851	67.2096		7.8505	50.109		15.8509	52.6141
0.852071	103.326		8.85172	94.8587		1.85279	69.6879		9.85092	64.0991		2.85273	79.5177		10.8515	60.4099		3.85181	69.8192		11.8521	54.5616		4.85306	73.9974		12.8523	59.4287		5.85168	57.0667		13.8521	57.2904		6.85181	53.4283		14.8526	68.9274		7.85161	57.198		15.8524	51.3317
0.853182	117.316		8.85269	84.7367		1.85355	77.8028		9.85217	61.1555		2.85398	92.5892		10.8531	65.5664		3.85271	62.9837		11.8537	61.0124		4.8541	76.6278		12.8534	61.6058		5.85265	65.2144		13.8533	60.0819		6.85271	67.153		14.8538	70.2247		7.85321	65.0743		15.8535	61.3762
0.854085	116.278		8.85388	91.5871		1.85466	78.113		9.85391	78.4381		2.85495	96.1978		10.854	76.9737		3.85417	76.5771		11.8548	74.2807		4.85521	75.0054		12.8545	68.7127		5.85404	66.3537		13.8543	62.1069		6.85403	74.6833		14.8548	73.8393		7.85473	64.2422		15.8545	75.1635
0.855682	117.289		8.85554	95.1212		1.8564	80.2543		9.85523	78.3725		2.85634	93.2125		10.8551	76.8246		3.85584	76.8694		11.8557	80.6748		4.85681	80.7613		12.8562	69.7714		5.85584	66.5147		13.8558	60.4726		6.85583	82.1242		14.8562	79.9829		7.85584	87.5908		15.8561	78.2114
0.857418	124.27		8.85714	101.002		1.85786	96.493		9.8562	80.6927		2.85807	97.2804		10.8567	77.7611		3.85702	78.6319		11.8573	79.1568		4.85847	104.99		12.8578	67.8598		5.85723	60.6306		13.8576	75.1814		6.85729	86.9287		14.858	89.0641		7.85696	74.1972		15.8578	73.7379
0.858598	114.229		8.85818	104.751		1.8589	98.0468		9.85738	82.2197		2.85946	100.427		10.8585	81.0983		3.85799	76.8395		11.859	85.6672		4.85959	98.2079		12.8589	71.5161		5.85814	72.041		13.8588	97.7874		6.85827	88.3841		14.8593	99.0698		7.85855	82.2733		15.859	75.0352
0.859571	130.026		8.85922	105.38		1.86001	97.5697		9.85912	87.7668		2.86044	109.982		10.8597	83.7645		3.85938	79.8577		11.8603	94.7454		4.86063	105.365		12.8598	82.8102		5.85939	83.6363		13.8597	89.9707		6.85938	101.503		14.8602	101.494		7.86022	87.561		15.86	89.249
0.861098	132.913		8.86089	116.844		1.86161	106.445		9.86071	79.4849		2.86168	112.413		10.8606	85.1244		3.86118	84.8501		11.8612	98.011		4.86215	127.187		12.8615	96.4453		5.86119	95.828		13.8611	90.5731		6.86118	104.08		14.8615	108.574		7.8614	93.2423		15.8614	105.008
0.862904	149.546		8.86256	121.545		1.86328	108.607		9.86176	98.0289		2.86342	130.608		10.8621	92.5415		3.86257	106.755		11.8626	103.677		4.86389	122.421		12.8632	107.104		5.86272	108.631		13.8629	95.661		6.86278	104.498		14.8633	110.599		7.86237	103.272		15.8632	105.097
0.864015	147.893		8.86367	134.896		1.86439	124.267		9.8628	103.698		2.86495	145.126		10.8639	102.201		3.86347	120.638		11.8644	132.233		4.86514	131.613		12.8644	124.849		5.86362	127.971		13.8643	102.407		6.86375	107.844		14.8648	119.916		7.8639	117.005		15.8645	111.706
0.864848	161.042		8.86464	140.819		1.86536	137.968		9.86453	110.898		2.86585	151.842		10.8651	124.255		3.86472	117.539		11.8657	127.441		4.86604	147.771		12.8653	127.169		5.8648	116.209		13.8652	119.433		6.86486	129.603		14.8657	137.542		7.86571	131.511		15.8654	124.831
0.866237	166.19		8.86624	156.757		1.86689	141.651		9.8662	120.921		2.86703	148.582		10.866	133.352		3.86646	122.454		11.8667	134.088		4.86757	148.639		12.8669	135.18		5.86661	125.311		13.8665	131.479		6.8666	128.777		14.867	152.075		7.86689	139.331		15.8668	118.744
0.867904	161.108		8.86804	166.217		1.86869	160.142		9.86724	123.361		2.86884	178.149		10.8675	140.113		3.86799	143.894		11.868	153.297		4.86938	161.23		12.8687	147.935		5.86814	157.529		13.8683	149.376		6.8682	128.726		14.8688	158.844		7.86779	148.072		15.8687	145.284
0.869223	191.933		8.86908	176.804		1.86987	174.045		9.86828	151.078		2.87037	210		10.8694	155.734		3.86889	140.259		11.8698	157.816		4.87056	193.529		12.8697	152.561		5.86904	167.49		13.8697	170.601		6.8691	150.461		14.8702	185.038		7.86932	159.507		15.87	168.877
0.870196	213.913		8.86992	185.459		1.87078	193.284		9.86995	186.052		2.8712	200.421		10.8705	176.306		3.87014	154.52		11.8712	174.189		4.87132	206.421		12.8705	167.448		5.87001	172.647		13.8706	189.741		6.87007	165.256		14.871	206.281		7.87112	177.97		15.8707	170.586
0.871446	213.087		8.87144	199.231		1.8723	221.038		9.87169	186.64		2.87224	209.195		10.8713	196.72		3.87195	189.07		11.872	190.973		4.87271	207.868		12.872	195.956		5.87161	189.995		13.8717	181.093		6.87167	181.254		14.8721	200.77		7.8723	194.594		15.872	179.956
0.873182	245.654		8.87311	232.529		1.87411	237.98		9.87266	176.947		2.87391	248.94		10.8726	211.426		3.87347	210.967		11.8732	209.046		4.87438	220.587		12.8737	212.377		5.87321	195.02		13.8734	193.436		6.87327	207.146		14.8739	204.161		7.87307	209.189		15.8737	214.104
0.87471	275.796		8.87429	245.102		1.87529	266.882		9.87349	216.472		2.87544	270.553		10.8744	239.636		3.87431	230.942		11.8748	226.424		4.8757	269.035		12.8749	246.394		5.87432	209.24		13.8749	225.255		6.87438	222.821		14.8753	230.116		7.87446	232.272		15.875	219.096
0.875682	296.673		8.87526	270.464		1.87605	294.06		9.87502	238.198		2.87655	302.175		10.8757	268.943		3.87535	236.623		11.8763	252.543		4.87667	314.197		12.8759	258.016		5.87536	233.492		13.8758	253.533		6.87535	241.86		14.8764	276.849		7.87612	248.687		15.876	240.524
0.876793	316.493		8.87665	305.789		1.87744	322.27		9.87669	262.829		2.87759	318.163		10.8766	283.768		3.87702	249.561		11.8773	290.63		4.87792	311.838		12.8773	268.275		5.87689	252.251		13.8769	258.281		6.87688	269.906		14.8775	310.29		7.87744	278.272		15.8772	247.476
0.878599	337.351		8.87846	340.253		1.87911	353.593		9.8778	307.889		2.87918	352.203		10.8779	309.884		3.87854	302.646		11.8785	311.855		4.87966	348.431		12.879	315.452		5.87862	278.716		13.8786	282.372		6.87868	324.149		14.8791	345.788		7.87841	309.813		15.8789	286.485
0.880196	410.588		8.87985	379.632		1.88043	391.531		9.87884	337.411		2.88085	382.295		10.8797	344.276		3.87959	323.904		11.8801	339.451		4.88118	400.699		12.8805	394.358		5.87987	317.978		13.8803	325.908		6.87993	391.251		14.8807	398.561		7.87966	347.62		15.8805	352.74
0.881168	488.725		8.88082	429.38		1.8814	444.974		9.88023	357.736		2.88203	423.472		10.8812	411.575		3.88063	348.41		11.8818	408.599		4.88216	456.558		12.8814	435.043		5.88077	363.438		13.8814	376.086		6.88083	415.795		14.8818	441.754		7.8814	374.929		15.8815	372.746
0.88221	530.994		8.88207	453.74		1.88265	485.045		9.88196	423.788		2.883	502.146		10.8822	470.831		3.88222	406.103		11.8828	477.222		4.88327	522.13		12.8826	441.056		5.88223	405.384		13.8824	424.68		6.88222	428.112		14.8828	469.176		7.883	415.503		15.8827	404.692
0.883946	562.201		8.88381	504.868		1.88439	534.289		9.88335	481.061		2.88446	539.726		10.8833	514.791		3.88396	476.28		11.8839	501.305		4.885	579.158		12.8844	499.521		5.88404	466.241		13.884	455.744		6.88403	489.653		14.8844	539.812		7.88397	514.973		15.8843	453.981
0.885612	669.26		8.88533	590.407		1.88591	648.682		9.88433	537.731		2.88627	593.39		10.885	558.148		3.88507	510.18		11.8855	544.226		4.8866	664.378		12.8859	631.889		5.88536	544.22		13.8857	528.31		6.88542	590.512		14.8861	614.833		7.88501	604.454		15.886	507.752
0.886515	782.612		8.88624	663.623		1.88696	718.558		9.88557	599.653		2.88752	709.492		10.8866	659.556		3.88604	563.221		11.8872	685.254		4.88764	766.746		12.8869	714.072		5.88619	611.853		13.8869	618.972		6.88632	660.233		14.8873	717.866		7.88675	630.839		15.887	604.028
0.887418	808.359		8.88749	725.668		1.88807	828.099		9.88738	672.442		2.88842	766.499		10.8876	736.21		3.88757	627.403		11.8883	780.692		4.88875	802.275		12.888	736.225		5.88758	645.228		13.8878	682.242		6.88764	723.61		14.8883	765.661		7.88841	723.917		15.8881	672.245
0.889015	876.517		8.88929	779.728		1.8898	900.527		9.88884	801.457		2.88988	867.611		10.8887	812.28		3.88938	701.395		11.8893	830.592		4.89042	901.756		12.8898	834.027		5.88946	741.471		13.8894	747.919		6.88952	793.924		14.8898	869.702		7.88946	794.527		15.8897	715.963
0.890682	1007.86		8.89089	911.404		1.8914	970.612		9.88974	889.156		2.89169	996.176		10.8904	898.669		3.89056	845.915		11.8909	861.003		4.89209	1045.94		12.8914	968.241		5.89077	896.641		13.8912	829.828		6.89084	937.049		14.8916	976.499		7.8905	863.03		15.8914	850.854
0.891793	1148.64		8.89172	1084.19		1.89244	1116.91		9.89099	943.046		2.89293	1099.6		10.8921	1029.76		3.89146	980.534		11.8926	993.576		4.89306	1196.13		12.8922	1057.56		5.89154	959.055		13.8923	943.449		6.89167	1041.72		14.8928	1112.15		7.89216	959.962		15.8925	976.943
0.892765	1243.31		8.89269	1135.41		1.89348	1197.7		9.8928	1047.85		2.89377	1203.83		10.893	1196.48		3.89292	1042.56		11.8937	1116.34		4.89396	1284.89		12.8932	1128.94		5.89279	1040.66		13.8931	1039.77		6.89285	1118.27		14.8936	1232.37		7.89383	1139.13		15.8934	1013.16
0.894293	1381.83		8.89436	1228.76		1.89522	1299.33		9.89425	1201.12		2.89502	1256.77		10.8939	1296.15		3.89479	1099		11.8945	1221.18		4.89556	1355.27		12.8949	1219.68		5.89452	1154.11		13.8944	1119.76		6.89452	1232.34		14.895	1282.52		7.8948	1236.32		15.8948	1072.72
0.896029	1502.73		8.89596	1330.77		1.89689	1523.92		9.89509	1294.09		2.89675	1352.18		10.8955	1338.36		3.89604	1271.8		11.896	1276.06		4.89715	1495.88		12.8964	1398.65		5.89584	1298.84		13.8962	1268.02		6.89597	1349.72		14.8966	1407.09		7.89571	1313.34		15.8965	1222.73
0.897279	1685.73		8.897	1447.46		1.89779	1652.9		9.8962	1405.91		2.89807	1531.78		10.8971	1466.44		3.89681	1394.21		11.8976	1438.84		4.89827	1603.89		12.8976	1502.12		5.89682	1422.98		13.8974	1404.42		6.89695	1475.67		14.898	1540.94		7.89723	1417.38		15.8977	1367.39
0.898251	1834.02		8.89804	1557.63		1.89869	1712.64		9.89787	1542.64		2.89905	1692.04		10.8982	1702.52		3.89813	1453.12		11.8989	1608.37		4.89931	1751.83		12.8986	1578.81		5.89807	1463.9		13.8984	1488.14		6.89806	1631.33		14.8989	1690.64		7.8989	1578.4		15.8986	1431.52
0.89964	1941.59		8.89964	1667.77		1.90022	1804.12		9.89939	1649.31		2.9003	1812.21		10.8992	1770.41		3.89979	1594.84		11.8998	1690.71		4.90077	1873.69		12.9001	1694.97		5.89973	1583.78		13.8997	1604.16		6.89979	1689.14		14.9002	1828.12		7.90008	1780.23		15.9	1494.78
0.901446	2140.07		8.90137	1838.73		1.90189	2036.22		9.90044	1839.89		2.90203	1897.77		10.9007	1848.16		3.90111	1736.6		11.9012	1808.37		4.9025	2014.08		12.9019	1913.53		5.90133	1778.76		13.9015	1803.13		6.90139	1847.35		14.902	1934.73		7.90105	1938.77		15.9018	1657.2
0.902765	2383.38		8.90256	2073.36		1.903	2316.61		9.90148	2002.98		2.90363	2114.24		10.9025	2078.41		3.90209	1907.96		11.903	1993.15		4.90382	2285.48		12.903	2132.03		5.90237	1969.95		13.9029	1982.41		6.90243	2062.27		14.9034	2132.54		7.90251	2001.96		15.9032	1885.64
0.903668	2580.99		8.90346	2241.8		1.90397	2394.08		9.90307	2131.56		2.9046	2271.78		10.9038	2195.9		3.90334	2035.28		11.9044	2161.79		4.90472	2445.53		12.9039	2286.56		5.90341	2004.75		13.9039	2177.87		6.90347	2176.18		14.9044	2329.51		7.90432	2115.88		15.9041	2051.2
0.905057	2697.71		8.90492	2329.05		1.90543	2511.93		9.90481	2326.75		2.90564	2384.22		10.9047	2394.63		3.90507	2172		11.9053	2354.59		4.90611	2516.5		12.9054	2365.95		5.90508	2169.88		13.9051	2215.04		6.90514	2302.26		14.9055	2424.38		7.90564	2318.1		15.9054	2135.16
0.906862	2881.47		8.90672	2516.64		1.90723	2622.39		9.90599	2493.77		2.90738	2551.42		10.906	2542.65		3.9066	2364.41		11.9065	2423.23		4.90792	2636.42		12.9072	2520.83		5.90675	2428		13.9068	2405.09		6.90688	2500.26		14.9073	2620.52		7.90654	2522.61		15.9072	2213.47
0.908251	3146.4		8.90797	2777.06		1.90848	2883.54		9.90689	2597.54		2.90905	2732.36		10.9078	2715.41		3.90764	2544.53		11.9083	2611.96		4.90931	2909.09		12.9085	2798.68		5.90786	2628.34		13.9083	2660.99		6.90799	2765.78		14.9089	2796.88		7.90786	2624.73		15.9086	2465.47
0.909015	3349.43		8.90887	2889.19		1.90946	3148.58		9.90842	2704.83		2.91009	2954.99		10.9092	2950.93		3.90875	2653.77		11.9098	2892.4		4.91021	3101.18		12.9094	2948.32		5.9089	2754.59		13.9093	2840.87		6.90896	2932.43		14.9099	3019.64		7.90973	2806.82		15.9095	2641.22
0.910196	3472.6		8.91033	2979.64		1.91084	3236.28		9.91023	2993.53		2.91113	3081.07		10.9101	3124.22		3.91042	2810.38		11.9108	3061.49		4.91153	3207.6		12.9108	3019.6		5.9105	2836.52		13.9105	2955.47		6.91056	3045.86		14.9109	3166.17		7.91112	3063.24		15.9108	2700.59
0.911862	3627.52		8.91214	3192.24		1.91258	3427.14		9.91141	3319.62		2.9128	3176.42		10.9115	3257.98		3.91202	3059.2		11.912	3180.44		4.91334	3369.49		12.9126	3165.85		5.91223	3055.81		13.9122	3074.7		6.91236	3230.74		14.9127	3296.19		7.91202	3265.34		15.9126	2868.1
0.913321	3867.98		8.91339	3450.88		1.91397	3742.69		9.91231	3453.57		2.91446	3384.23		10.9133	3334.23		3.91306	3219.72		11.9137	3355.45		4.91472	3633.72		12.9139	3456.26		5.91327	3306.08		13.9138	3353.17		6.9134	3451.22		14.9143	3530.89		7.91334	3243.91		15.914	3028.68
0.914362	4058.39		8.91422	3566.86		1.91487	3880.89		9.91384	3483.58		2.91543	3621.1		10.9147	3665.21		3.9141	3332.64		11.9153	3635.64		4.91556	3839.5		12.9147	3674.76		5.91411	3437.38		13.9147	3525.01		6.91417	3555.19		14.9153	3736.97		7.91515	3419.1		15.9149	3181.23
0.915474	4201.82		8.91547	3730.38		1.91626	4009.94		9.91571	3691.59		2.91634	3776.82		10.9155	3885.12		3.91577	3429.39		11.9162	3830.72		4.91667	3861.86		12.916	3754.01		5.91564	3578.62		13.9157	3630.01		6.91563	3761.99		14.9162	3878.85		7.91654	3625.42		15.916	3348.95
0.91714	4458.54		8.91721	3933.43		1.91807	4243.46		9.91689	3945		2.91787	3873.84		10.9167	3932.53		3.9175	3712.22		11.9171	3914.05		4.91834	4044.09		12.9177	3965.22		5.9173	3735.55		13.9173	3743.58		6.91736	3990.97		14.9177	4011.31		7.91737	3879.52		15.9177	3519.94
0.918737	4683.67		8.9186	4103.52		1.91939	4532.97		9.91766	4105.4		2.91946	4120.7		10.9183	4106.88		3.91847	3910.07		11.9188	3999.5		4.91979	4338.86		12.9191	4199.39		5.91848	3946.31		13.9189	3926.05		6.91854	4144.57		14.9194	4294.94		7.91848	3984.5		15.9192	3743.1
0.919849	5006.69		8.91957	4303.31		1.92022	4821.78		9.91898	4268.34		2.92064	4336.07		10.9197	4368.46		3.91938	4077.4		11.9203	4194.26		4.92084	4526.58		12.9201	4368.05		5.91939	4150.27		13.92	4191.13		6.91952	4309.36		14.9205	4460		7.92015	4139.32		15.9202	3878.91
0.920821	5189.36		8.92075	4487.75		1.9214	4893.99		9.92071	4444.69		2.92162	4478.22		10.9208	4532.83		3.92091	4308.46		11.9214	4417.15		4.92195	4682.42		12.9212	4635.66		5.92084	4339.23		13.921	4327.44		6.9209	4448.89		14.9215	4642.27		7.92168	4408.82		15.9213	4111.01
0.922418	5320.73		8.92249	4638.69		1.92307	5043.61		9.92203	4652.92		2.92307	4709.28		10.9219	4655.57		3.9225	4503.3		11.9224	4589.86		4.92361	4841.56		12.923	4807.84		5.92265	4562.21		13.9225	4489.7		6.92264	4634.93		14.923	4757.6		7.92272	4669.31		15.9229	4145.25
0.924154	5589.37		8.92408	4833.37		1.92453	5293.5		9.92301	4842.34		2.92481	4841.63		10.9235	4794.6		3.92368	4673.28		11.9239	4779.74		4.92528	5117.19		12.9246	4940.79		5.92404	4855.53		13.9243	4770.42		6.9241	4956.27		14.9248	4949.3		7.92383	4792.08		15.9246	4367.81
0.925335	5800.86		8.92506	5060.64		1.92557	5508.09		9.92426	5012.26		2.9262	5006.29		10.9252	5080.18		3.92472	4869.79		11.9257	5024.58		4.92632	5390.3		12.9255	5144.04		5.92487	4962.05		13.9256	4979.09		6.92507	5151.28		14.9261	5243.58		7.9255	4968.38		15.9258	4544.08
0.926307	6020.87		8.92617	5259.38		1.92668	5663.2		9.92599	5153.24		2.9271	5298		10.9263	5360.64		3.92611	5014.05		11.927	5300.49		4.92736	5550.92		12.9266	5372.28		5.92612	5087.33		13.9265	5256.81		6.92625	5286.79		14.927	5487.58		7.92716	5174.74		15.9268	4763.51
0.927904	6291.16		8.92783	5417.23		1.92828	5867.34		9.92752	5532.69		2.92842	5514.01		10.9273	5568.82		3.92785	5152.72		11.9279	5502.61		4.92896	5667.44		12.9283	5457.38		5.92793	5271.86		13.9278	5351.06		6.92806	5476.15		14.9284	5592.96		7.92828	5439.62		15.9282	4885.88
0.92964	6546.66		8.9295	5673.53		1.92994	6024.47		9.92849	5775.02		2.93023	5668.86		10.9289	5720.04		3.92924	5480.72		11.9293	5623.62		4.9307	5883.27		12.93	5713.74		5.92946	5447.86		13.9296	5512.19		6.92958	5678.48		14.9302	5817.26		7.92925	5614.1		15.93	5065.7
0.930751	6809.31		8.93054	5923.29		1.93105	6300.58		9.9296	5876.59		2.93162	5975.21		10.9306	5939.59		3.93014	5622.44		11.9311	5703.86		4.93181	6110.55		12.931	5986.44		5.93036	5687.41		13.931	5793.95		6.93056	5877.26		14.9315	6135.93		7.93078	5751.07		15.9313	5320.37
0.931585	7015.91		8.93158	6082.29		1.93209	6608.29		9.93134	5985.26		2.93259	6209.07		10.9318	6283.51		3.93146	5752.35		11.9324	6039.94		4.93278	6301.56		12.932	6152.23		5.93161	5845.63		13.9318	6018.38		6.93167	6132.44		14.9324	6299.07		7.93258	5975.38		15.9322	5456.56
0.933043	7126.45		8.93325	6195.25		1.93362	6730.06		9.93301	6302.59		2.93384	6269.55		10.9327	6470.19		3.93327	5958.84		11.9333	6171.29		4.93438	6473.33		12.9337	6276.72		5.93341	6151.89		13.9333	6154.11		6.93347	6281.11		14.9337	6377.87		7.93376	6217.36		15.9336	5583.3
0.93471	7358.34		8.93492	6447.08		1.93536	7038.9		9.93398	6514.86		2.93564	6400.21		10.9343	6512.01		3.93466	6221.55		11.9347	6305.86		4.93611	6804.07		12.9354	6546.6		5.93487	6466.93		13.9351	6434.3		6.935	6518		14.9356	6610.74		7.93466	6475.55		15.9354	5727.66
0.93589	7762.42		8.93596	6724.96		1.93654	7324.61		9.93502	6688.91		2.9371	6733.96		10.936	6713.59		3.93563	6450.53		11.9366	6653.14		4.93722	7057.94		12.9364	6803.16		5.93571	6707.14		13.9365	6747.46		6.9359	6841.17		14.9369	6933.47		7.93619	6619.08		15.9367	5994.23
0.936862	7997.52		8.93679	6943.66		1.93751	7524.32		9.93676	6826.06		2.93794	6959.37		10.9372	6915.92		3.93688	6635.14		11.9378	6958.35		4.93806	7076.66		12.9373	7032.48		5.93675	6823.12		13.9372	6813.94		6.93695	6966.19		14.9377	7195.63		7.938	6789.73		15.9375	6217.71
0.938251	8225.13		8.93832	7091.28		1.93904	7654.81		9.93842	7221.38		2.93905	7070.2		10.9381	7113.26		3.93868	6806.57		11.9387	7128.48		4.93945	7214.65		12.9388	7265.34		5.93841	6843.37		13.9384	7015.6		6.93854	7076.83		14.9389	7256.59		7.93911	7114.18		15.9388	6387.85
0.939987	8438.56		8.93992	7302.38		1.94078	7931.43		9.93939	7516.26		2.94071	7258.22		10.9394	7357.88		3.94014	7168.35		11.9399	7237.87		4.94118	7569.65		12.9404	7501.36		5.94001	7146.84		13.9401	7097.95		6.94007	7328		14.9406	7489.6		7.93994	7316.74		15.9404	6605.2
0.941446	8694.95		8.9411	7721.86		1.94189	8329.69		9.9403	7657.69		2.94224	7464.26		10.9411	7611.4		3.94097	7416.37		11.9416	7512.46		4.94243	7828.66		12.9416	7725.09		5.94105	7372.03		13.9415	7512.09		6.94118	7633.19		14.942	7880.88		7.94133	7439.88		15.9418	6843.09
0.942348	8966.95		8.94207	7895.9		1.94272	8458.35		9.94182	7831.98		2.94321	7768.52		10.9424	7954.85		3.94209	7598.67		11.943	7827.89		4.94341	8086.18		12.9426	7902.85		5.94209	7528.59		13.9425	7819.79		6.94222	7832.83		14.9431	8171.54		7.943	7643.22		15.9427	7051.15
0.943529	9101.78		8.94353	8103.3		1.94418	8553.46		9.94349	8075.69		2.94432	7900.07		10.9433	7991.72		3.94368	7735.71		11.9439	7970.97		4.94472	8233.14		12.944	8046.42		5.94369	7734.28		13.9437	7874.09		6.94375	7960.58		14.9442	8335.6		7.94432	7852.45		15.944	7233.8
0.945334	9400.61		8.94533	8206.82		1.94584	8774.08		9.9446	8423.98		2.94592	8058.85		10.9447	8185.83		3.94521	7973.55		11.9451	8101.5		4.94646	8396.44		12.9457	8236.11		5.94543	8004.73		13.9453	8113.6		6.94556	8175.95		14.9459	8481.39		7.94529	8084.48		15.9457	7323.53
0.946862	9731.06		8.94672	8404.12		1.94709	9113.68		9.94557	8532.87		2.94759	8420.59		10.9464	8414.04		3.94632	8101.63		11.9468	8331.45		4.94799	8637.91		12.9471	8597.57		5.94654	8254.89		13.947	8367.82		6.94674	8527.14		14.9475	8583.53		7.94661	8337.44		15.9473	7450.07
0.947835	10095.7		8.94763	8688.9		1.94807	9486.38		9.9471	8728.73		2.94877	8689.73		10.9479	8653.04		3.94736	8286.19		11.9485	8535.74		4.94889	8995.53		12.948	8813.79		5.94751	8517.45		13.9481	8581.34		6.94764	8736.18		14.9486	8988.51		7.94835	8459.92		15.9483	7768.17
0.948946	10226		8.94887	8888.99		1.94939	9662.88		9.94891	8928.03		2.94967	8850.17		10.9488	8939.56		3.94896	8551.51		11.9495	8771.25		4.95	9253.44		12.9494	8783.47		5.94897	8794.52		13.949	8810.09		6.9491	8927.23		14.9496	9139.41		7.9498	8690.71		15.9493	8000.39
0.950751	10425.5		8.95068	9072.11		1.95112	9812.81		9.95016	9177.26		2.9512	9045.61		10.95	9176.98		3.9507	8689.46		11.9505	9078.17		4.95181	9320.61		12.9511	9098.46		5.95077	8930.98		13.9507	8989.05		6.9509	9170.87		14.9512	9351.85		7.95078	9007.53		15.9511	8051.27
0.952348	10886.6		8.95214	9414.65		1.95258	10108.1		9.95106	9357.43		2.953	9273.67		10.9517	9337.25		3.95181	9059.42		11.9521	9318.27		4.95334	9711.1		12.9526	9473.97		5.95202	9042.11		13.9524	9245.25		6.95222	9391.93		14.953	9590.45		7.95196	9126.35		15.9527	8231.06
0.953251	11182.3		8.95311	9561.52		1.95355	10426.4		9.95238	9544.23		2.95419	9611.02		10.9533	9685.08		3.95271	9290.32		11.9539	9504.24		4.95431	10020.2		12.9535	9730.94		5.95293	9369.49		13.9535	9531.17		6.95313	9643.25		14.9541	9875.89		7.95369	9229.87		15.9538	8584.56
0.954223	11324.2		8.95436	9732.3		1.95473	10598.8		9.95419	9721.33		2.95509	9813.07		10.9543	9991.08		3.95424	9384.44		11.9549	9760.43		4.95549	10209.7		12.9548	9909.86		5.95439	9536.98		13.9544	9694.62		6.95452	9798.92		14.955	10010.1		7.95529	9505.48		15.9548	8837.14
0.955821	11450.3		8.95617	9950.55		1.95647	10799		9.95557	10170.8		2.95662	9883.16		10.9554	10096.9		3.95604	9690.54		11.9559	9986.34		4.95722	10281.5		12.9565	10067.2		5.95619	9773.32		13.9561	9968.23		6.95639	9976.88		14.9566	10188		7.95626	9907.74		15.9565	8926.01
0.957348	11752.5		8.95763	10324.1		1.95807	11061.3		9.95655	10381.9		2.95842	10179.2		10.9572	10241.4		3.95722	9877.32		11.9576	10242		4.95875	10460.9		12.958	10249.7		5.95744	10099.6		13.9578	10153.1		6.95764	10191.5		14.9584	10428.5		7.95737	10045.5		15.9581	9174.21
0.95846	12000.5		8.95846	10654.2		1.95904	11272.1		9.9578	10618.9		2.9596	10422.3		10.9588	10656.1		3.95813	10030.3		11.9593	10464.1		4.95965	10716.6		12.9588	10519.9		5.95828	10326.1		13.9589	10570.5		6.9584	10428.9		14.9594	10816.5		7.95911	10163.8		15.9591	9452.11
0.959501	12331.8		8.95957	10675.4		1.96015	11293.1		9.9596	10757.7		2.96037	10650.1		10.9597	10872.3		3.95966	10252.1		11.9603	10576		4.9607	10892.9		12.9599	10688.8		5.95959	10437.9		13.9597	10667.9		6.95965	10683.8		14.9602	10953.6		7.96071	10384.7		15.9601	9500.16
0.961029	12499.4		8.96124	10785.7		1.96189	11460.2		9.96106	10905.3		2.96175	10849.7		10.9606	10907.4		3.96146	10490		11.9612	10713.7		4.96229	10961.1		12.9616	10856.5		5.96126	10650.6		13.9612	10671.9		6.96139	10990.9		14.9617	11049.3		7.96161	10735.9		15.9616	9597.59
0.962765	12703		8.96283	11039.9		1.96348	11920.4		9.96189	11173.3		2.96342	11087.6		10.9622	11129.7		3.96264	10844.3		11.9626	10873.4		4.96382	11158.3		12.9631	11222		5.96258	10857.9		13.9628	10870.6		6.96278	11173.5		14.9634	11234.9		7.96258	10970.5		15.9632	9787.31
0.964015	13063		8.96381	11451.1		1.96439	12366.1		9.96301	11299		2.96467	11356.9		10.9638	11310.8		3.96341	10995.3		11.9643	11181.2		4.96493	11550.4		12.9641	11551.5		5.96355	11027		13.964	11124.6		6.96375	11325.2		14.9646	11471.4		7.96418	10974.8		15.9644	9884.61
0.964918	13252.8		8.96492	11594.8		1.96536	12250.4		9.96467	11523.9		2.96571	11310.8		10.9649	11533.4		3.96479	11059.8		11.9655	11201.1		4.96597	11700.1		12.9652	11609		5.9648	11258.4		13.965	11333.5		6.96493	11323.7		14.9656	11635.1		7.96584	11261.4		15.9654	10096.6
0.966376	13290.1		8.96651	11674.5		1.96696	12336.3		9.9662	11825.9		2.96696	11370.1		10.9659	11717.5		3.96646	11285.3		11.9664	11502.4		4.9675	11881.5		12.9668	11713.3		5.96654	11363.5		13.9664	11525		6.9666	11494.2		14.9669	11909.2		7.96696	11477.4		15.9668	10276
0.968182	13692.1		8.96825	11791.6		1.96855	12736.8		9.96724	12025.3		2.96863	11559.9		10.9674	11902.2		3.96778	11546.2		11.9678	11638.5		4.96924	12143.8		12.9685	11954.6		5.96807	11594.5		13.9681	11652.2		6.96827	11892.7		14.9686	12108.8		7.96793	11534.7		15.9686	10457.2
0.969501	13970.9		8.96943	12030.1		1.96959	12853.4		9.96835	12068.4		2.97023	12009.3		10.9692	12123.8		3.96875	11613.5		11.9696	11915.3		4.97049	12373.6		12.9696	12093.2		5.96904	11819.8		13.9696	11919.3		6.96931	12051.8		14.9701	12199.2		7.96946	11736.7		15.9699	10743.2
0.970404	14066.7		8.97033	12170.6		1.97064	12833.4		9.96995	12180.2		2.9712	12049.8		10.9705	12359.5		3.97	11669		11.971	12030.5		4.97139	12468.9		12.9706	12267.9		5.97015	11985.5		13.9705	12133.3		6.97035	12078.5		14.971	12379.5		7.97119	11849.9		15.9708	10936.3
0.971793	14112.6		8.97193	12372.1		1.97216	13107.5		9.97162	12348.1		2.97231	12137.2		10.9714	12472.4		3.97174	12006.3		11.9719	12276		4.97278	12414.9		12.9721	12416		5.97189	12044.2		13.9717	12361.2		6.97202	12190.3		14.9722	12452.1		7.97244	12063.2		15.9721	10983.7
0.973668	14493		8.97374	12564.6		1.9739	13380.9		9.97273	12554.3		2.97405	12442.8		10.9728	12447.7		3.97327	12351.7		11.9732	12526.7		4.97459	12644.1		12.9739	12641.8		5.97355	12319.2		13.9735	12343.7		6.97368	12505.9		14.974	12630.3		7.97334	12225.6		15.9739	11031.3
0.974987	14743.8		8.97492	12696.1		1.97515	13530.2		9.9737	12813.8		2.97564	12466.3		10.9746	12677.7		3.97424	12440.9		11.975	12509.7		4.97591	12760.6		12.9751	12613.8		5.97459	12507.8		13.975	12335.2		6.97479	12747.7		14.9755	12961		7.97473	12386.5		15.9754	11176.3
0.975751	14820.9		8.97575	12833.7		1.97612	13646.3		9.97523	12720.6		2.97668	12453.4		10.9759	12822.9		3.97535	12285.6		11.9765	12717.5		4.97681	13012.4		12.976	12643.2		5.97557	12597.7		13.9759	12693.9		6.97577	12849.6		14.9765	13102.6		7.97661	12450.6		15.9763	11341.5
0.977001	15032.4		8.97728	12885.8		1.97751	13844.2		9.97703	12945.8		2.97773	12674.1		10.9769	12984.9		3.97709	12441.7		11.9774	12855.8		4.9782	13136.7		12.9776	12833.1		5.9773	12714.5		13.9771	12793.5		6.97743	12926.1		14.9776	13114.6		7.97793	12463.4		15.9776	11462.2
0.978668	14942.1		8.97915	13005.6		1.97932	13942.2		9.97821	13103.9		2.97946	12918.4		10.9783	13172.8		3.97868	12639.9		11.9787	12945.4		4.98	13142.3		12.9793	13008.9		5.97897	12736.5		13.9789	12930.7		6.97917	12966		14.9794	13065.9		7.97883	12583.2		15.9794	11501.2
0.980126	15128.9		8.98026	13245.3		1.98064	14130.6		9.97912	13317.7		2.98113	13009.6		10.9801	13205.1		3.97972	12887.1		11.9805	13021.8		4.98139	13370.5		12.9805	13287.8		5.97994	12935.1		13.9805	13199.1		6.98014	13046.1		14.981	13358.5		7.98022	12789.8		15.9809	11618.2
0.981098	15257		8.9811	13409.3		1.98154	14110.3		9.98071	13485.5		2.98203	12994.6		10.9814	13282.9		3.98077	12881.1		11.9819	13049.5		4.98216	13501.8		12.9813	13415.7		5.98084	13011.5		13.9813	13252.9		6.98104	13215.6		14.9819	13682.4		7.98203	12895.5		15.9816	11809.5
0.982279	15481.5		8.98242	13459.1		1.98293	14072.9		9.98245	13448.4		2.98293	13037		10.9822	13456.6		3.9825	12892.7		11.9828	13270.9		4.98341	13489.2		12.9826	13509.5		5.98237	13065.6		13.9823	13209.4		6.9825	13301.5		14.9829	13674		7.98334	12991.6		15.9827	12001.2
0.983946	15636.2		8.98408	13583.8		1.98473	14248.7		9.98363	13432.8		2.98453	13167.2		10.9834	13369.9		3.98417	12965.6		11.9839	13379.1		4.98507	13560		12.9844	13436.2		5.98404	13269		13.984	13363.1		6.98417	13217.2		14.9845	13579.1		7.98418	13216.5		15.9844	11974.3
0.985543	15683.3		8.9854	13551.3		1.98605	14580.3		9.98446	13434.3		2.98613	13246.5		10.9851	13492.9		3.98507	13236.1		11.9855	13403.1		4.98646	13706.5		12.9857	13586.5		5.98522	13345		13.9855	13515.8		6.98535	13537.4		14.9861	13807.5		7.98536	13324.7		15.9859	12011.7
0.986585	15769.6		8.98637	13687.5		1.98689	14575.5		9.98585	13688.4		2.98724	13284.8		10.9865	13403.4		3.98598	13264.8		11.987	13302.6		4.9875	13771.5		12.9867	13583.6		5.98612	13499.5		13.9866	13610.5		6.98632	13658.9		14.9872	13933		7.98703	13276.7		15.987	12066.8
0.987626	15709.1		8.98769	13594.9		1.98807	14569.7		9.98752	14006.2		2.98821	13413.1		10.9875	13531.9		3.98757	13387.5		11.988	13469.8		4.98861	13882		12.9879	13534.5		5.98758	13403.9		13.9876	13643.2		6.98771	13667.8		14.9882	13972.2		7.98848	13315		15.988	12038.7
0.989223	15704.6		8.98943	13707.7		1.9898	14659.8		9.98884	13913.2		2.98974	13461.4		10.9887	13730.8		3.98917	13532.1		11.9891	13631.2		4.99035	13910.4		12.9896	13752.2		5.98932	13491		13.9892	13637.5		6.98952	13821.9		14.9898	14116.7		7.98953	13353.1		15.9896	12051.9
0.99096	15779		8.99096	13849.6		1.99126	14872.2		9.98981	14097.7		2.99155	13492.6		10.9904	13963.3		3.99035	13434.6		11.9907	13591.8		4.99195	13923.5		12.9912	13845.2		5.99071	13433		13.991	13720.9		6.9909	13813.4		14.9915	13973.9		7.99064	13430.8		15.9913	12076.1
0.992071	16080.6		8.99193	13772.5		1.99216	15021.6		9.99113	14011.1		2.9928	13564.8		10.9919	13983		3.99132	13508.4		11.9924	13721.1		4.99299	13809.4		12.9921	13885		5.99161	13514.8		13.9921	13745.2		6.99181	13663.1		14.9927	13966.2		7.9923	13423.5		15.9924	12285.3
0.993043	16009.7		8.99304	13917		1.99334	15037.3		9.99287	13953.3		2.99377	13654.7		10.9931	13961.4		3.99285	13594.8		11.9936	13680.6		4.99403	13833.4		12.9932	13981		5.99293	13563.4		13.9931	13803.7		6.99306	13801.4		14.9936	13986.3		7.99397	13528.4		15.9934	12290
0.99471	15922.1		8.99478	13929.3		1.99501	14984.2		9.99439	13969.8		2.99509	13557.8		10.994	14057.3		3.99459	13562.9		11.9946	13696.4		4.9957	14036.6		12.995	13865.6		5.99473	13751.4		13.9945	13957.5		6.99486	13817.3		14.995	14064.1		7.99501	13603.7		15.995	12410
0.996446	16003.4		8.99638	13917.8		1.99668	14868.8		9.99537	14038.3		2.99689	13611.1		10.9956	14128.1		3.99591	13495.6		11.996	13809.8		4.99736	14029.7		12.9966	13807.1		5.99619	13751.1		13.9963	13810.3		6.99639	13834.6		14.9968	14227		7.99605	13490.5		15.9968	12485.8
0.997487	16074.2		8.99742	13991.2		1.99772	14984.4		9.99655	14058.9		2.99828	13746.7		10.9974	14070.5		3.99681	13649.1		11.9978	13857.3		4.99847	13983.6		12.9976	13969.4		5.99709	13700		13.9976	13870.2		6.99729	13834.4		14.9982	14119.2		7.99765	13491		15.9979	12462.8
0.998321	16281		8.99846	13995.3		1.99869	14906.5		9.99828	14190.7		2.99918	13784.3		10.9985	14058.5		3.9982	13675		11.9991	13850.8		4.99945	13927.1		12.9987	14084.3		5.99834	13793.3		13.9985	13926.1		6.99854	13921.8		14.9991	14183.2		7.99946	13451.8		15.9989	12422.8
0.999779	16297.6		9.00019	13826.4		2.00029	14777.4		9.99988	14205.5		3.0005	13651.5		10.9994	13940.8		3.99993	13738.3		12	13864.8		5.00104	13939.5		13.0004	14065.9		6.00015	13846.1		13.9999	14001.3		7.00035	14056.7		15.0005	14151.1		8.00057	13496.4		16.0004	12472
1.00145	16119.3		9.00186	13960.7		2.00203	14898.7		10.0009	14123.7		3.00231	13731.2		11.001	14112		4.00132	13743.1		12.0014	13871.3		5.00285	14021.8		13.0021	14060.2		6.00161	13608.7		14.0018	14012.3		7.00181	13983.8		15.0023	14146.2		8.00147	13493.3		16.0022	12300.7
1.0027	16122.7		9.00276	14015.4		2.00321	15066.2		10.002	13955.3		3.0037	13523.7		11.0029	14054		4.00222	13613.3		12.0032	13881.5		5.00389	13985.9		13.003	14103.1		6.00244	13639.2		14.003	13972.8		7.00264	13954.9		15.0036	14149.5		8.00307	13450.2		16.0034	12322.9
1.00367	16183.2		9.00367	13816.9		2.00418	15101.7		10.0037	14010		3.00453	13500		11.004	14118.1		4.00354	13563.4		12.0045	13743.3		5.00472	14163.7		13.0039	14019.9		6.00355	13800.2		14.0038	13819.3		7.00368	13960.3		15.0044	14118.7		8.00487	13528.4		16.0042	12358.3
1.00506	16150.6		9.00526	13737.8		2.00578	15068		10.0054	13979.6		3.00564	13356.6		11.0047	14148.9		4.00535	13516.1		12.0053	13635.3		5.00618	13991.8		13.0055	13854.4		6.00522	13695.4		14.0051	13862.5		7.00535	13919		15.0056	14029		8.00591	13440.6		16.0056	12414.2
1.00679	16253.1		9.00693	13838.8		2.00751	14943.2		10.0063	13854		3.00731	13497		11.0062	14057.3		4.00681	13428.7		12.0066	13714.9		5.00785	13956.8		13.0071	13942.7		6.00675	13607.6		14.0068	13857.9		7.00688	13762.8		15.0073	14030		8.00675	13549.6		16.0072	12389
1.00818	16080.4		9.00804	13834.2		2.00855	14752.7		10.0072	14071.6		3.00877	13509.4		11.0079	14053.6		4.00757	13462.2		12.0083	13663.3		5.0091	13808.8		13.0082	13928.2		6.00779	13647.2		14.0082	13805.4		7.00792	13641.3		15.0087	14056.6		8.00821	13426.6		16.0086	12154.9
1.00915	15846.1		9.00901	13784		2.00939	14728.6		10.0088	13944.9		3.00981	13504.7		11.0091	13861.8		4.00868	13577.8		12.0096	13612.4		5.01007	13769.8		13.0092	13879.6		6.00883	13709.6		14.0092	13754		7.00896	13760.1		15.0097	13952		8.00987	13293		16.0095	12217.9
1.0104	15846		9.01054	13694.9		2.01084	14812.7		10.0104	13755		3.01092	13376.1		11.0101	13663.1		4.01042	13498.4		12.0106	13673		5.01139	13720.4		13.0107	13924.5		6.01043	13613.4		14.0104	13633.7		7.01056	13862.4		15.0109	13904		8.01112	13218.9		16.0108	12212.5
1.01214	15817		9.01228	13613		2.01258	14598.3		10.0115	13834.5		3.01259	13325.2		11.0115	13864.4		4.01188	13232.2		12.0119	13762.9		5.01313	13816.2		13.0124	13862.2		6.01209	13510.5		14.0121	13642.1		7.01229	13697.6		15.0125	13965.3		8.01209	13261.8		16.0125	12204.7
1.01367	15715.4		9.0136	13603.7		2.01376	14587.5		10.0125	13641.3		3.01425	13230.7		11.0133	13851.7		4.01292	13272.1		12.0136	13557.8		5.01459	13753.3		13.0137	13795.5		6.01327	13510.9		14.0137	13615.9		7.01347	13639.6		15.0142	13873.7		8.01341	13278.2		16.014	12048.6
1.01457	15665.2		9.0145	13704.3		2.01473	14428.8		10.014	13717.5		3.01537	13083		11.0147	13665.4		4.01403	13302.8		12.0152	13458.2		5.01556	13453.4		13.0147	13655.4		6.01425	13482.5		14.0147	13530.1		7.01445	13462.2		15.0152	13658.8		8.01522	13083.3		16.0149	11958
1.01582	15513.4		9.01589	13528.2		2.01612	14491.7		10.0158	13797.2		3.01634	13127.3		11.0156	13707.8		4.0157	13186.8		12.0162	13432		5.01674	13393.4		13.016	13560		6.01577	13389.4		14.0158	13345.4		7.0159	13579.2		15.0162	13632.8		8.01668	13104		16.0161	11931
1.01763	15540.9		9.01769	13192.5		2.01786	14384.7		10.017	13572.2		3.01793	13072.2		11.0168	13623.1		4.01736	13056.3		12.0172	13309.8		5.01847	13433.1		13.0178	13437.2		6.01758	13195.3		14.0174	13470.8		7.01771	13446.4		15.0179	13640.4		8.01758	12959.6		16.0179	11860.3
1.01915	15423.3		9.01908	13203		2.01925	14235.7		10.018	13239.5		3.01967	12920.2		11.0185	13536.6		4.01848	12876		12.0189	13189.7		5.02	13283.7		13.0192	13245.4		6.01876	13074.7		14.0191	13371.3		7.01896	13278.1		15.0195	13652.6		8.01876	13100.2		16.0195	11999.4
1.01999	15278.9		9.01999	13217.1		2.02022	14185.4		10.0194	13222.5		3.02085	12748.8		11.0201	13271.3		4.01945	12843.6		12.0206	12953.5		5.02097	13238.4		13.0202	13149		6.01966	13080.6		14.0201	13040.1		7.01986	13032.4		15.0207	13309.7		8.02057	12979.7		16.0205	11769
1.02103	15120.9		9.02138	13302.3		2.0214	14033		10.0211	13308.5		3.02175	12779		11.021	13119.4		4.02097	12914.5		12.0217	12782.5		5.02215	13074.9		13.0214	13179.9		6.02119	12997.6		14.0212	12954.2		7.02139	12919.8		15.0217	13136		8.02209	12780.5		16.0215	11408.3
1.02263	15041.7		9.02318	12983.4		2.02321	13927.9		10.0225	13109.1		3.02328	12703.7		11.0222	12957.2		4.02271	12577.1		12.0227	12804.2		5.02396	12991.5		13.0232	13051.4		6.023	12827.1		14.0228	12902.6		7.0232	12947.1		15.0233	13177.2		8.02307	12601.1		16.0233	11421.7
1.02415	14887.5		9.02457	12744.8		2.02473	13647.2		10.0234	13070.2		3.02509	12455.4		11.024	12930.7		4.02389	12353.3		12.0244	12686.4		5.02549	12830.7		13.0246	12749.9		6.02418	12597.8		14.0245	12830.9		7.02445	12743.5		15.025	13013.7		8.02425	12411.8		16.025	11315.5
1.02527	14671.1		9.0254	12719.5		2.02571	13440.2		10.0248	13047		3.0262	12183.7		11.0256	12865		4.02479	12358.8		12.026	12524.9		5.02632	12558.8		13.0255	12613		6.02494	12466.7		14.0255	12800.9		7.02521	12597.2		15.0261	12740.8		8.02598	12309.9		16.0259	11148.6
1.02631	14620		9.02651	12624.2		2.02689	13270.9		10.0266	12853.4		3.02703	12116.8		11.0265	12776.9		4.02639	12336.3		12.0271	12355.5		5.02736	12512.1		13.0266	12626.3		6.02633	12439.5		14.0264	12503.2		7.02653	12528.9		15.0269	12773.3		8.02751	12126.6		16.0268	11160.3
1.0279	14352.1		9.02818	12334.9		2.02869	13201.5		10.0279	12616		3.02842	12126.8		11.0274	12659.3		4.0282	12304.5		12.0279	12287.3		5.02903	12537.4		13.0283	12414.7		6.028	12224.6		14.0279	12367.1		7.0282	12494.6		15.0284	12677.6		8.02841	11887.3		16.0284	11137.1
1.02964	14087.4		9.02971	12232		2.03022	12982.9		10.0288	12458.8		3.03016	11975.2		11.0291	12524		4.02931	12100.8		12.0294	12207.8		5.03056	12324.3		13.0298	12205		6.02932	11913.1		14.0295	12305.4		7.02952	12191.9		15.0301	12398.8		8.02946	11950.2		16.03	10812
1.03075	13900.2		9.03068	12186.5		2.03112	12744.3		10.0299	12369.6		3.03141	11728.5		11.0306	12183.3		4.03007	11749.6		12.031	11985.7		5.0316	11905.7		13.0307	12096.5		6.03029	11775.4		14.0307	12014.1		7.03049	12168.8		15.0313	12102.9		8.03105	11644.2		16.0311	10665.7
1.03172	13832.4		9.03179	12001		2.03209	12656.5		10.0316	12226.4		3.03238	11531.8		11.0317	11993.3		4.03146	11591.3		12.0322	11777		5.03264	11898.2		13.0319	11970.6		6.03161	11784.7		14.0317	11853		7.03174	12213.6		15.0323	11993.7		8.03265	11478.6		16.0321	10613.8
1.03325	13540.3		9.03353	11814.1		2.03369	12533.3		10.0331	11911.3		3.03363	11413.8		11.0327	11977.8		4.0332	11347.8		12.0332	11618.6		5.03424	11658.8		13.0335	11862.3		6.03334	11764.4		14.0332	11691.7		7.0334	11710.2		15.0336	11927.9		8.03369	11277.2		16.0336	10372.1
1.03506	13245.1		9.03519	11529.8		2.03529	12249.8		10.0341	11590		3.03537	11263.3		11.0343	11808		4.03452	11159.3		12.0346	11383		5.03597	11434.1		13.0352	11546.6		6.0348	11393.7		14.0349	11480.4		7.035	11540.4		15.0354	11730.1		8.03473	11199.5		16.0354	10141.2
1.03624	13047.5		9.03624	11262.6		2.03633	12018.7		10.0352	11549		3.03689	10873.9		11.036	11717		4.03542	11068		12.0364	11244.1		5.03716	11253.1		13.0363	11298.9		6.03577	11129.1		14.0363	11131.8		7.03604	11299		15.0368	11409.9		8.03626	11010.4		16.0366	9969.54
1.03714	12849.9		9.03728	11029.2		2.03737	11857.2		10.0369	11465.4		3.03787	10667.1		11.0372	11436.6		4.03674	10882.1		12.0378	10950.1		5.03806	11043.6		13.0373	11117.7		6.03696	11021.4		14.0372	10904		7.03708	11078.3		15.0377	11124.1		8.03807	10755.6		16.0375	9774.43
1.03867	12691.1		9.03888	10940.7		2.0389	11650		10.0386	11058.4		3.03905	10508.1		11.0381	11163		4.03854	10662.9		12.0387	10778.5		5.03952	10818.9		13.0388	10903.8		6.03869	10831.1		14.0385	10796.1		7.03875	10847.5		15.039	11000.5		8.03932	10563.6		16.0389	9615.16
1.04047	12422.7		9.04061	10699		2.04064	11408.9		10.0396	10909		3.04078	10415.6		11.0396	10883.7		4.04	10358.8		12.04	10581.2		5.04132	10648.9		13.0406	10706.7		6.04029	10500.3		14.0403	10746.9		7.04049	10680.6		15.0407	10752		8.04022	10408.3		16.0407	9389.77
1.04165	11987.7		9.04172	10388		2.04189	11049.7		10.0406	10807.9		3.04238	9989.99		11.0414	10774.5		4.04097	10103.8		12.0417	10320.3		5.04264	10307.4		13.0418	10471.7		6.04126	10305		14.0417	10378.1		7.04153	10375.3		15.0423	10512		8.04161	10227.5		16.0421	9239.24
1.04249	11818.5		9.04269	10136.4		2.04279	10955.7		10.0422	10574.8		3.04335	9792.05		11.0427	10498.4		4.04216	9956.46		12.0432	9971.68		5.04354	10268.9		13.0427	10329.8		6.0423	10196.2		14.0426	10143.9		7.0425	10194.2		15.0432	10324.3		8.04348	9986.73		16.043	8999.01
1.04381	11677.4		9.04422	10172.1		2.04425	10685.2		10.044	10364.6		3.04446	9787.38		11.0436	10213		4.04389	9725.81		12.0442	9729.8		5.04493	10132.9		13.0442	10101.8		6.04404	9945.18		14.0439	9993.49		7.04424	10015.6		15.0443	10067.5		8.0448	9617.47		16.0443	8919.4
1.04554	11360.7		9.04603	9837.37		2.04605	10442.4		10.0451	10127.2		3.0462	9580.33		11.0451	10099.9		4.04542	9539.76		12.0454	9680.75		5.04674	9866.53		13.046	9731.38		6.04571	9634.41		14.0457	9800.07		7.0459	9861.65		15.0461	9862.88		8.04564	9387.3		16.0461	8711.76
1.04686	11037.6		9.04707	9478.82		2.04737	10230.2		10.0461	9849.42		3.0478	9254.28		11.0469	9855.64		4.04639	9295.74		12.0472	9563.65		5.04806	9583.68		13.0471	9494.06		6.04668	9338.85		14.0471	9295.87		7.04688	9529.49		15.0477	9604.19		8.04703	9265.79		16.0475	8380.34
1.04783	10735		9.0479	9293.89		2.04828	9911.82		10.0477	9562.1		3.0487	8923.06		11.0481	9400.99		4.04757	9172.43		12.0487	9246.24		5.04889	9247.99		13.048	9373.92		6.04758	9171.86		14.048	9171.97		7.04778	9366.4		15.0486	9311.92		8.0489	9103.87		16.0484	8133.89
1.04908	10650.5		9.04936	9191.61		2.04966	9643.9		10.0494	9293.69		3.04967	8876.74		11.049	9171.21		4.04931	8902.58		12.0495	8915.31		5.05014	8985.84		13.0494	9299.24		6.04918	9064.9		14.0491	9155.87		7.04931	9260.98		15.0496	9178.27		8.05022	8710.65		16.0495	7888.09
1.05075	10396.9		9.05103	8903.39		2.05147	9397.26		10.0505	8941.07		3.0512	8803.36		11.0502	8972.52		4.05091	8581.1		12.0505	8726.95		5.05181	8858.38		13.051	8978.08		6.05077	8795.51		14.0508	8874.66		7.0509	8962.4		15.0512	8934.5		8.05098	8408.18		16.0512	7804.13
1.05235	9972.2		9.05235	8536.21		2.05279	9234.03		10.0513	8873.72		3.0528	8500.16		11.0519	8692.41		4.05181	8364.5		12.0522	8582.31		5.0532	8659.97		13.0523	8574.6		6.05189	8474.03		14.0523	8511.78		7.05208	8515.94		15.0528	8649.73		8.05223	8445.55		16.0527	7585.54
1.05332	9746.63		9.05325	8413.02		2.05362	8896.64		10.0527	8772.19		3.05391	8141.88		11.0533	8629.47		4.05278	8272.72		12.0537	8298.23		5.05417	8371.68		13.0533	8440.27		6.05286	8325.71		14.0533	8208.92		7.05306	8351.61		15.0539	8343.13		8.0539	8215.4		16.0536	7338.57
1.05443	9464.52		9.05457	8324.3		2.05487	8694.06		10.0544	8451.96		3.05488	7999.77		11.0543	8369.18		4.05438	8082.69		12.0548	7973.36		5.05535	8229.38		13.0546	8221.52		6.05439	8196.34		14.0544	7997.75		7.05452	8431.39		15.0549	8216.53		8.05529	7893.17		16.0548	7251.97
1.0561	9290.5		9.05637	8037.37		2.05654	8380.23		10.0556	8218.9		3.05641	7863.34		11.0555	8040.88		4.05597	7886.06		12.0558	7905.54		5.05709	7991.7		13.0563	8062.56		6.05619	7923.97		14.056	7791.16		7.05625	8221.73		15.0565	7966.35		8.05626	7622.11		16.0565	7049.36
1.05777	8886.58		9.05783	7733.89		2.05793	8227.73		10.0567	7880.23		3.05821	7583.16		11.0572	7814.4		4.05702	7507.14		12.0574	7731.92		5.05868	7567.24		13.0578	7812.78		6.05744	7594.98		14.0576	7689.18		7.05764	7826.09		15.0582	7701.9		8.05744	7597.51		16.0581	6753.73
1.05881	8604.36		9.05874	7512.42		2.0589	8008.83		10.058	7687.12		3.05946	7262.88		11.0588	7618.11		4.05799	7355.21		12.0592	7501.26		5.05966	7351.6		13.0588	7434.18		6.05834	7338.46		14.0588	7489.35		7.05854	7433.51		15.0593	7519.39		8.05918	7343.63		16.0592	6554.92
1.05985	8438.71		9.05992	7459.02		2.06008	7755.03		10.0597	7615.48		3.06037	6998.87		11.0598	7429.78		4.05952	7160.64		12.0603	7175.55		5.06077	7246.07		13.06	7226.17		6.05973	7104.03		14.0598	7188.61		7.05986	7270.15		15.0603	7296.95		8.06078	7126.57		16.0602	6445.15
1.06152	8285.35		9.06172	7266.23		2.06175	7566.85		10.0612	7373.26		3.06175	6884.46		11.0608	7316.07		4.06132	6941.07		12.0612	6940.13		5.06243	7058.7		13.0617	7155.84		6.06154	7071.8		14.0612	7088.55		7.06167	7112.22		15.0618	7224.76		8.06182	6788.15		16.0618	6286.79
1.06318	7902.19		9.06332	6917.6		2.06334	7334.29		10.0622	7190.53		3.06356	6737.93		11.0625	7067.83		4.06257	6724.57		12.0628	6923.16		5.0641	6871.33		13.0633	6889.61		6.06286	6695.53		14.0631	6769.94		7.06306	6793.61		15.0636	6987.18		8.06286	6627.03		16.0635	6011.56
1.06422	7635.75		9.06429	6570.88		2.06439	7070.59		10.0634	6843		3.06488	6423.57		11.0642	6795.46		4.06347	6474.15		12.0646	6613.99		5.06514	6532.4		13.0643	6620.19		6.06376	6470.6		14.0643	6454.83		7.06403	6598.88		15.0648	6650.91		8.06453	6487		16.0646	5732.63
1.06506	7329.12		9.0654	6515.78		2.06543	6858.84		10.0652	6693.16		3.06578	6209.96		11.0653	6492.52		4.06493	6380.32		12.0657	6203.48		5.06611	6371.01		13.0654	6409.27		6.06508	6327.3		14.0651	6301.98		7.06528	6492.78		15.0657	6411.28		8.06626	6253.79		16.0656	5640.77
1.06658	7101.6		9.06714	6302.43		2.06709	6743.28		10.0667	6357.91		3.06717	6085.26		11.0663	6360.64		4.06667	6076.25		12.0667	6031.58		5.06778	6224.24		13.0671	6250.41		6.06689	6187.35		14.0667	6142.81		7.06709	6314.16		15.0671	6238.6		8.0673	6052.2		16.0672	5506.71
1.06825	6894.08		9.06874	6052.62		2.06876	6419.98		10.0677	6115.56		3.06905	5863.46		11.0679	6222.91		4.06799	5825.84		12.0682	5993.33		5.06952	5928.3		13.0687	5990.24		6.06827	5712.99		14.0685	5975.9		7.06854	5989.97		15.0689	5998.29		8.06834	5964.92		16.0689	5326.96
1.06943	6696.81		9.06964	5803.31		2.06987	6199.46		10.0688	5994.47		3.07037	5558.92		11.0697	5907.31		4.06889	5614.83		12.0701	5697.24		5.07056	5753.39		13.0696	5732.33		6.06911	5540.8		14.0696	5668.09		7.06938	5791.36		15.0702	5762.31		8.06994	5776.23		16.07	5120.5
1.0704	6478.65		9.07061	5564.97		2.07084	6000.78		10.0706	5824.68		3.07113	5441.05		11.0707	5590.71		4.07028	5478.02		12.0712	5419.77		5.07139	5535.56		13.0705	5559.26		6.07022	5476.87		14.0705	5499.26		7.07049	5637.74		15.071	5539.54		8.07168	5473.83		16.0709	4978.97
1.07186	6261.32		9.07221	5462.88		2.07251	5741.42		10.0722	5517.54		3.07238	5410.37		11.0715	5463.17		4.07209	5291.84		12.072	5292.53		5.07285	5348.68		13.0721	5530.42		6.07196	5239.51		14.0717	5351.85		7.07215	5492.84		15.0723	5512.38		8.07272	5181.29		16.0722	4785.97
1.0736	6001.97		9.07381	5321.16		2.07425	5481.87		10.0731	5238.89		3.07405	5186.92		11.073	5372.62		4.07341	5019.55		12.0733	5095.99		5.07452	5253.25		13.0737	5191.34		6.07341	5077.7		14.0735	5126.2		7.07361	5148.41		15.074	5333.47		8.07362	5009.31		16.074	4601.68
1.07499	5741.14		9.07492	5083.18		2.07529	5191.65		10.074	5198.42		3.07544	4942.88		11.0747	5104.61		4.07417	4824.1		12.0751	4948.09		5.0757	5039.72		13.0748	4902.11		6.07439	4906.86		14.0748	4861.11		7.07465	4984.11		15.0754	5051.46		8.07508	4847.69		16.0752	4384.39
1.07589	5539.53		9.07589	4779.7		2.07612	4984.86		10.0757	5037.38		3.07648	4641.05		11.0759	4951.31		4.07542	4769.28		12.0764	4736.5		5.07667	4754.71		13.0758	4751.09		6.07557	4741.08		14.0758	4782.3		7.07577	4956.58		15.0764	4834.92		8.07675	4656.62		16.0761	4291.31
1.07721	5386.53		9.07742	4609.58		2.07758	4894.98		10.0772	4751.2		3.07759	4584.92		11.0769	4722.68		4.07709	4529.16		12.0773	4605.8		5.07813	4606.02		13.0773	4786.55		6.07716	4620.61		14.077	4493.29		7.07736	4749.5		15.0775	4646.97		8.07793	4434.87		16.0774	4187.87
1.07895	5183.9		9.07922	4406.02		2.07925	4735.85		10.0784	4572.54		3.07925	4406.96		11.0783	4558.19		4.07854	4328.59		12.0786	4443.15		5.07986	4398.05		13.0791	4538.87		6.07883	4408.22		14.0787	4337.26		7.07903	4507.75		15.0793	4549.22		8.0789	4389.89		16.0793	3959.68
1.0804	4904.49		9.08047	4329.55		2.0805	4494.37		10.0794	4370.24		3.08092	4197.05		11.08	4286.19		4.07952	4178.62		12.0803	4218.53		5.08125	4141.62		13.0804	4226.35		6.07994	4160.25		14.0803	4164.47		7.08014	4332.19		15.0809	4255.09		8.08029	4228.49		16.0807	3749.33
1.08138	4671.9		9.08138	4139.69		2.08147	4352.28		10.0809	4285.35		3.08196	3952.17		11.0814	4130.73		4.08063	3972.66		12.0819	4003.25		5.08216	3952.19		13.0813	4031.44		6.08091	3993.23		14.0812	3888.67		7.08111	4089.57		15.0818	4008.59		8.08209	3944.31		16.0816	3520.56
1.08263	4488.63		9.08276	4012.2		2.08286	4090.96		10.0827	4139.92		3.08294	3780.61		11.0824	4012		4.08236	3836.9		12.0828	3790.99		5.08341	3861.3		13.0827	3854.31		6.08251	3809.9		14.0824	3709.08		7.08264	3965.94		15.083	3876.43		8.08348	3674.26		16.0828	3361.42
1.08443	4286.47		9.08464	3726.73		2.08459	3832.25		10.084	3832.6		3.0846	3761.71		11.0836	3876.8		4.08396	3602.56		12.0839	3563.85		5.08521	3673.69		13.0845	3710.55		6.08425	3623.42		14.0841	3550.02		7.08445	3746.58		15.0846	3830.98		8.08439	3526.97		16.0846	3199.55
1.08589	3965.62		9.08596	3478.59		2.08598	3725.38		10.0849	3628.21		3.08634	3483.65		11.0854	3673.92		4.085	3373.42		12.0857	3477.98		5.08667	3425.07		13.0859	3520.66		6.08543	3348.57		14.0858	3391.1		7.0857	3460.94		15.0863	3552.52		8.08564	3422.94		16.0861	2990.14
1.08672	3738.51		9.08679	3237.4		2.08696	3449.21		10.0863	3570.78		3.08745	3256.96		11.0869	3427.25		4.08604	3294.21		12.0873	3257.17		5.08757	3217.71		13.0868	3329.55		6.08633	3223.13		14.0867	3193.43		7.0866	3307.7		15.0873	3323.05		8.08744	3287.52		16.0871	2805.3
1.08783	3596.32		9.08818	3223.48		2.08821	3319.21		10.0881	3397.35		3.08842	3075.57		11.0878	3175.55		4.08764	3117.8		12.0883	2990.65		5.08882	3105		13.0881	3200.69		6.08793	3181		14.0878	3034.9		7.08813	3241.78		15.0883	3183.03		8.08897	3057.94		16.0882	2713.1
1.0895	3454.08		9.09006	3052.42		2.09001	3112.71		10.0894	3158.28		3.09002	2935.54		11.089	3083.71		4.08938	2932.53		12.0894	2899.4		5.09063	2903.76		13.0899	2975.33		6.08973	2916.26		14.0895	2881.68		7.08993	3063.59		15.09	2987.23		8.08987	2815.69		16.09	2615.06
1.09103	3185.15		9.09138	2845.34		2.09147	2870.06		10.0903	2963.51		3.09175	2740.04		11.0908	2930.16		4.09049	2775.33		12.0912	2784.87		5.09209	2680.81		13.0913	2771.07		6.09084	2669.32		14.0912	2724.51		7.09111	2731.37		15.0917	2711.14		8.09105	2715.11		16.0916	2394.63
1.09207	2995.61		9.09214	2595.27		2.09244	2658.54		10.0918	2845.65		3.09287	2523.98		11.0924	2597.78		4.09146	2647.74		12.0928	2529.45		5.09292	2455.67		13.0921	2599.51		6.09161	2479.08		14.0921	2458.48		7.09188	2608.23		15.0927	2505.52		8.09286	2570.17		16.0925	2190.57
1.09318	2835.01		9.09339	2504.38		2.09362	2559.41		10.0936	2560.57		3.0937	2408.66		11.0932	2427.24		4.09306	2413.81		12.0937	2285.22		5.09403	2347.25		13.0933	2486.95		6.093	2458.93		14.093	2287.69		7.09327	2564.39		15.0935	2431.87		8.09439	2371.37		16.0935	2101.27
1.09478	2686.57		9.09506	2322.02		2.09543	2407.68		10.0948	2308.37		3.09516	2294.97		11.0942	2374.6		4.09486	2183.04		12.0946	2152.28		5.0957	2253.44		13.095	2238.1		6.09473	2254.51		14.0945	2257.53		7.09493	2393.39		15.095	2339.04		8.09522	2125.58		16.0951	2007.95
1.09652	2464.97		9.09651	2096.91		2.09696	2188.61		10.0956	2179.41		3.09682	2135.88		11.096	2249.68		4.09591	1998.15		12.0962	2067.52		5.09722	2075.96		13.0964	2044.78		6.09598	2031.74		14.0962	2051.27		7.09625	2206.96		15.0967	2142.04		8.09626	2021.46		16.0967	1816.67
1.09763	2215.6		9.09749	1956.39		2.09779	2026.97		10.0969	2112.41		3.098	1942.79		11.0975	2029.33		4.09674	1902.78		12.0978	1858.28		5.09827	1899.09		13.0974	1986.31		6.09696	1823.21		14.0974	1890.94		7.09722	2013.28		15.0979	1972.92		8.09793	1943.59		16.0978	1675.76
1.0986	2125.34		9.09867	1808.58		2.09883	1902.83		10.0986	1959.6		3.09898	1797.7		11.0985	1859.19		4.0982	1803.72		12.0989	1698.89		5.09931	1730.89		13.0985	1880.44		6.09827	1771.5		14.0983	1728.02		7.09847	1916.36		15.0989	1766.41		8.09946	1777.61		16.0988	1577.78
1.10013	2011.51		9.10033	1744.86		2.1005	1741.39		10.0999	1745.73		3.10037	1688.15		11.0996	1715.56		4.09986	1665.85		12.0999	1615.59		5.10091	1606.47		13.1002	1717.61		6.10001	1593.66		14.0998	1593.02		7.10021	1760.55		15.1003	1713.93		8.1005	1617.02		16.1003	1478.53
1.10193	1732.2		9.102	1580.43		2.10203	1602.43		10.101	1652.3		3.1021	1558.56		11.1012	1565.07		4.10104	1547.06		12.1014	1516.27		5.10264	1500.52		13.1019	1519.51		6.10147	1460.6		14.1016	1457.6		7.10174	1599.39		15.102	1554.77		8.10154	1517.1		16.1021	1330.93
1.10311	1534.75		9.10304	1372.79		2.10307	1427.35		10.1022	1534.45		3.10356	1396.82		11.1029	1450.81		4.10202	1416.16		12.1032	1393.48		5.10382	1346.39		13.103	1342.67		6.10244	1333.51		14.1029	1315.47		7.10271	1438.63		15.1034	1367.63		8.10314	1380.72		16.1033	1229.74
1.10402	1394.69		9.10408	1277.18		2.10411	1308.68		10.1038	1392.74		3.10446	1317.06		11.104	1312.11		4.10341	1311.48		12.1045	1258.6		5.10479	1207.79		13.1039	1274.99		6.10362	1237.19		14.1038	1187.85		7.10382	1323.15		15.1044	1195.73		8.10487	1242.6		16.1042	1071.71
1.10554	1294.38		9.10568	1198.61		2.10571	1242.33		10.1054	1272.97		3.10571	1212.93		11.105	1227.95		4.10521	1183.29		12.1054	1123.44		5.10625	1114.46		13.1055	1166.39		6.10536	1178.74		14.1051	1116.48		7.10556	1243.56		15.1057	1147.42		8.10605	1115.76		16.1056	1021.08
1.10735	1173.21		9.10742	1079.94		2.10744	1070.78		10.1065	1110.66		3.10745	1128.86		11.1065	1144.77		4.1066	1018.87		12.1068	1045.15		5.10806	1029.73		13.1073	1040.95		6.10696	1030.47		14.1069	1047.07		7.10715	1093.64		15.1075	1067.34		8.10703	1039.3		16.1075	931.534
1.1086	1073.36		9.10853	936.267		2.10855	920.357		10.1076	983.713		3.10898	983.412		11.1083	1033.19		4.10757	910.503		12.1086	923.915		5.10924	881.023		13.1085	896.069		6.10793	870.045		14.1083	898.872		7.1082	910.414		15.1089	911.037		8.10848	933.78		16.1088	789.74
1.10936	951.611		9.1095	859.839		2.10953	865.843		10.1092	940.088		3.10995	853.764		11.1096	863.397		4.10875	837.385		12.11	804.318		5.11014	794.825		13.1094	822.256		6.10904	777.975		14.1093	733.774		7.10931	854.089		15.1098	817.842		8.11022	854.769		16.1096	713.139
1.11075	885.616		9.1111	788.994		2.11105	830.15		10.1109	817.824		3.11106	819.512		11.1105	774.169		4.11056	780.781		12.1109	686.799		5.11167	752.386		13.111	753.892		6.11077	736.577		14.1105	705.278		7.11097	832.5		15.1111	774.798		8.11154	746.04		16.111	675.314
1.11242	793.378		9.11283	723.732		2.11286	737.185		10.112	700.312		3.11287	763.394		11.1119	743.135		4.11209	666.999		12.1122	676.245		5.11347	661.927		13.1128	671.425		6.11244	636.866		14.1124	663.656		7.11264	727.717		15.1129	695.26		8.11244	656.215		16.1129	576.376
1.11374	668.234		9.11388	587.762		2.11404	606.026		10.1129	647.525		3.11446	618.373		11.1138	671.351		4.11299	624.641		12.114	594.675		5.11466	572.105		13.1138	576.793		6.11334	559.332		14.1138	540.26		7.11361	621.486		15.1143	584.741		8.1139	595.799		16.1142	487.765
1.11471	595.436		9.11478	555.469		2.11494	551.258		10.1146	611.123		3.11537	553.698		11.115	541.84		4.11417	562.544		12.1154	467.592		5.11549	514.65		13.1146	480.557		6.11425	519.905		14.1146	461.189		7.11452	559.943		15.1152	530.039		8.11571	509.566		16.115	441.02
1.11596	577.613		9.11624	508.859		2.11647	510.258		10.1163	531.432		3.11634	518.035		11.1158	475.782		4.11597	498.689		12.1162	424.015		5.11681	482.826		13.1161	464.586		6.11584	482.975		14.1157	454.804		7.11611	509.673		15.1163	489.047		8.11696	433.069		16.1162	421.477
1.1177	538.581		9.1179	443.588		2.11828	446.206		10.1174	471.923		3.11794	490.529		11.1172	449.296		4.1175	440.683		12.1173	408.298		5.11847	397.961		13.1178	439.946		6.11744	428.089		14.1174	403.508		7.11771	450.113		15.118	428.145		8.11772	392.351		16.1179	378.63
1.11929	456.054		9.11908	388.248		2.11953	403.38		10.1182	412.291		3.11946	435.619		11.1189	427.009		4.1184	391.803		12.119	362.582		5.11986	339.594		13.119	382.399		6.11855	350.661		14.1189	358.6		7.11882	382.489		15.1195	370.903		8.11904	378.299		16.1193	313.314
1.12027	368.048		9.12006	348.702		2.12029	363.053		10.1197	361.75		3.12057	380.407		11.1202	366.265		4.11938	336.746		12.1205	322.186		5.12084	311.68		13.12	344.408		6.11959	316.445		14.1199	296.983		7.11986	366.014		15.1205	331.962		8.12071	337.017		16.1203	291.352
1.12138	345.836		9.12144	347.807		2.12161	320.868		10.1213	320.009		3.12162	354.294		11.1212	322.231		4.12098	325.428		12.1215	293.231		5.12209	294.597		13.1213	328.473		6.12112	317.635		14.121	288.617		7.12132	327.408		15.1216	314.143		8.12209	280.061		16.1215	262.331
1.12311	325.482		9.12318	314.259		2.12334	289.926		10.1226	281.388		3.12314	329.344		11.1224	288.307		4.1225	278.653		12.1226	248.487		5.12375	277.788		13.123	287.63		6.12286	255.672		14.1226	260.995		7.12306	293.628		15.1232	281.761		8.12307	260.357		16.1231	236.808
1.12471	276.846		9.12464	284.183		2.12466	258.594		10.1236	268.287		3.12488	304.591		11.1242	263.029		4.12361	246.012		12.1243	238.959		5.12535	244.753		13.1245	247.712		6.12411	230.548		14.1243	238.064		7.12438	262.03		15.1249	235.487		8.12425	251.237		16.1247	211.011
1.12575	254.905		9.12561	228.482		2.12564	233.963		10.125	235.347		3.12613	272.912		11.1257	213.561		4.12466	240.053		12.126	216.227		5.12632	211.518		13.1255	205.566		6.12501	199.27		14.1254	193.404		7.12528	224.643		15.126	201.328		8.12598	230.325		16.1258	188.793
1.12679	235.264		9.12679	209.434		2.12689	221.688		10.1268	218.515		3.12703	234.512		11.1267	193.028		4.12618	223.615		12.1271	188.101		5.12743	186.401		13.1266	184.406		6.1264	197.671		14.1264	178.295		7.1266	200.901		15.127	194.352		8.12758	192.566		16.1268	179.229
1.12853	236.397		9.12853	179.894		2.12862	196.636		10.1281	181.949		3.12849	222.359		11.1278	183.86		4.12792	181.755		12.128	166.706		5.1291	178.757		13.1285	167.428		6.12821	198.36		14.1279	175.71		7.1284	185.035		15.1284	192.545		8.12855	173.98		16.1285	156.092
1.1302	194.072		9.13013	165.755		2.13022	173.163		10.129	178.107		3.1303	202.685		11.1295	159.563		4.12917	171.478		12.1296	154.29		5.13077	138.92		13.13	143.858		6.12952	160.58		14.1297	163.148		7.12986	164.863		15.1302	169.566		8.12966	178.143		16.1302	144.837
1.1311	163.777		9.1311	150.557		2.13112	163.297		10.1303	170.216		3.13162	180.374		11.1312	145.776		4.13007	157.517		12.1314	138.371		5.13181	132.332		13.131	148.016		6.13036	132.051		14.1309	145.358		7.13077	150.24		15.1315	149.766		8.13133	157.458		16.1313	133.31
1.13207	152.012		9.13221	143.503		2.13223	157.839		10.1321	142.293		3.13252	188.656		11.1322	133.566		4.13153	152.307		12.1326	124.724		5.13285	130.333		13.1321	141.279		6.13175	135.314		14.1318	149.289		7.13209	149.906		15.1324	132.466		8.133	136.388		16.1322	122.842
1.1336	160.688		9.13401	147.908		2.13397	138.63		10.1336	145.439		3.13398	175.298		11.1333	129.746		4.13334	124.724		12.1335	113.528		5.13452	131.336		13.1339	138.976		6.13362	118.025		14.1333	135.532		7.13389	138.779		15.1339	124.202		8.13404	120.551		16.1338	112.35
1.1352	155.304		9.13554	142.674		2.13564	120.933		10.1345	110.086		3.13578	158.743		11.1349	115.422		4.13466	113.185		12.1351	108.583		5.13618	126.904		13.1355	113.6		6.13494	109.096		14.1351	108.897		7.13528	109.749		15.1357	116.078		8.13508	119.174		16.1356	114.805
1.13638	137.918		9.13644	119.469		2.13661	136.405		10.1358	114.223		3.13703	139.444		11.1366	104.277		4.13556	111.488		12.1368	103.2		5.13716	112.401		13.1363	95.5268		6.13577	103.865		14.1363	94.7812		7.13611	120.742		15.1369	102.174		8.13675	104.903		16.1367	104.748
1.13735	129.072		9.13742	105.133		2.13765	120.85		10.1376	103.051		3.13787	138.114		11.1376	88.5183		4.13702	112.589		12.1379	101.062		5.13806	100.415		13.1373	99.9138		6.13696	91.277		14.1371	95.9562		7.13722	105.079		15.1377	85.8193		8.13848	102.365		16.1375	97.1909
1.13881	127.235		9.13908	104.286		2.13932	100.451		10.1391	89.4458		3.13912	136.14		11.1385	76.4846		4.13882	88.7599		12.1387	82.5358		5.13959	96.9076		13.1389	97.7605		6.13862	96.171		14.1385	99.8929		7.13889	95.4492		15.139	84.4773		8.13946	88.5094		16.139	83.7913
1.14061	108.673		9.14061	104.238		2.14105	103.403		10.1399	85.8581		3.14078	119.221		11.14	85.9505		4.14	95.6669		12.1402	83.687		5.14118	82.9026		13.1405	87.3224		6.14008	85.9207		14.1401	98.527		7.14035	93.2692		15.1407	97.7993		8.14036	85.1215		16.1406	83.9136
1.14186	103.916		9.14172	86.7259		2.14203	102.401		10.141	86.6573		3.14217	107.271		11.1416	88.1276		4.14084	101.593		12.1419	77.5165		5.14236	78.2025		13.1416	85.3809		6.14105	68.2952		14.1415	78.3516		7.14139	88.9746		15.142	92.6578		8.14189	93.2781		16.1419	78.1518
1.14277	92.9202		9.14276	90.1258		2.14293	84.6204		10.1427	86.3144		3.14314	110.265		11.1428	79.5564		4.14209	82.2793		12.1431	74.3791		5.1434	74.8652		13.1426	72.5808		6.14223	73.8602		14.1424	73.0281		7.1425	80.3139		15.143	73.0222		8.14348	84.0955		16.1429	75.3066
1.14415	80.0306		9.14429	93.9014		2.14446	83.8361		10.1442	65.3636		3.14432	106.415		11.1438	66.6012		4.14375	67.5645		12.1442	75.7212		5.14486	59.1723		13.1441	60.7111		6.1439	64.5911		14.1437	77.5016		7.14417	76.2341		15.1443	80.6718		8.14466	75.757		16.1443	61.8892
1.14596	81.2772		9.14603	83.9733		2.14612	83.5289		10.1452	58.6891		3.14606	102.896		11.1452	71.4863		4.14521	70.7944		12.1454	51.6687		5.1466	59.1067		13.1459	68.3548		6.14557	76.1476		14.1455	76.5115		7.14583	65.4202		15.146	82.9772		8.14564	66.0763		16.146	63.2909
1.14735	82.5865		9.14728	78.1368		2.14723	74.9279		10.1463	65.9242		3.14766	89.1058		11.1469	70.8868		4.14618	78.4142		12.1471	54.4393		5.14792	53.7981		13.1471	63.8277		6.14661	66.5326		14.1469	58.2149		7.14688	75.1128		15.1475	77.5821		8.14709	52.629		16.1474	55.5428
1.14825	84.2268		9.14818	69.3479		2.14828	69.3539		10.1479	60.0342		3.1487	80.9611		11.1483	58.5191		4.14736	73.6157		12.1487	58.7428		5.14882	53.488		13.148	58.7756		6.14765	63.1626		14.148	48.5582		7.14792	65.629		15.1485	67.9075		8.14883	46.4407		16.1484	56.3241
1.14957	83.4573		9.14964	66.3269		2.14973	67.3826		10.1496	57.1562		3.14974	69.9355		11.1492	48.1108		4.1491	74.1495		12.1496	61.8206		5.15021	52.8647		13.1494	58.1583		6.14925	57.0936		14.1491	49.3723		7.14945	63.0433		15.1496	63.431		8.15022	56.6641		16.1496	60.9348
1.15138	81.0357		9.15144	76.1805		2.15147	68.7038		10.1508	54.3886		3.15134	70.69		11.1506	46.6197		4.1507	65.8348		12.1507	57.2994		5.15202	55.5279		13.1512	47.6933		6.15098	58.7011		14.1508	52.9959		7.15118	61.4836		15.1514	50.8993		8.15112	50.8486		16.1513	57.5111
1.15277	71.2387		9.15276	62.0084		2.15279	71.7875		10.1518	61.919		3.15307	73.5292		11.1523	58.3342		4.15167	77.5135		12.1526	53.2315		5.15341	53.5118		13.1526	57.7497		6.15209	50.6905		14.1524	55.0358		7.15236	62.9926		15.153	44.4575		8.15237	48.7848		16.1529	46.4169
1.1536	78.1488		9.15367	67.7673		2.15369	71.2119		10.1532	60.8811		3.15418	68.1461		11.1538	57.1324		4.15278	80.5167		12.1542	45.1882		5.15431	57.0071		13.1535	53.315		6.15307	50.2879		14.1534	54.3349		7.15333	43.533		15.1541	43.1363		8.15418	50.4579		16.1538	39.8826
1.15471	71.4326		9.15506	69.5686		2.15501	65.3069		10.155	56.3927		3.15516	64.8357		11.1547	52.3964		4.15438	60.0759		12.1551	51.6687		5.15556	51.8298		13.1549	43.9058		6.15466	48.0214		14.1545	51.4958		7.15493	46.7718		15.1551	43.5449		8.15564	41.5736		16.155	41.8987
1.15645	82.1183		9.15693	72.7896		2.15682	63.5265		10.1563	49.0115		3.15682	67.4751		11.156	41.0845		4.15604	53.4253		12.1562	59.0709		5.15736	45.2478		13.1567	45.0629		6.1564	39.7842		14.1562	40.3926		7.15667	54.326		15.1568	44.2785		8.15654	42.4295		16.1568	49.7601
1.1579	74.3165		9.15818	65.8049		2.15828	52.6857		10.1572	50.2074		3.15856	64.5017		11.1578	47.8156		4.15716	53.485		12.158	46.3304		5.15882	42.1909		13.158	44.3412		6.15744	40.5149		14.1579	38.7165		7.15778	55.5935		15.1584	47.8454		8.15779	48.2242		16.1583	43.4435
1.15888	70.7854		9.15894	60.1684		2.15918	49.3246		10.1586	52.7304		3.1596	46.0381		11.1592	47.4517		4.15813	58.3491		12.1596	52.6499		5.15966	36.7333		13.1588	41.3797		6.15834	49.9986		14.1587	47.234		7.15861	50.8516		15.1594	51.5912		8.15966	41.6899		16.1592	38.4869
1.15999	75.2559		9.16019	58.9068		2.16043	48.8326		10.1604	44.8094		3.16043	54.3886		11.16	45.719		4.15979	56.1691		12.1605	47.9557		5.16077	38.5763		13.1601	40.0645		6.1598	57.3381		14.1597	46.5719		7.16007	37.2253		15.1603	48.0035		8.16112	43.181		16.1602	46.6495
1.16165	73.8572		9.16193	66.6251		2.16223	49.0294		10.1617	36.6229		3.16189	63.3893		11.1611	44.2905		4.16153	65.7364		12.1614	39.5665		5.16243	42.9305		13.1617	38.9849		6.16147	57.4813		14.1613	42.8977		7.16174	40.2971		15.1618	51.8447		8.16196	41.4066		16.1618	43.9296
1.16332	60.568		9.16332	68.665		2.16369	49.2411		10.1624	44.4515		3.16356	54.5348		11.1628	46.0023		4.16257	61.6237		12.163	45.0629		5.16396	36.444		13.1631	36.6229		6.16265	44.532		14.1629	44.4575		7.16299	41.2366		15.1634	46.9805		8.16307	42.1074		16.1634	40.2017
1.16443	65.793		9.16429	74.3135		2.16453	44.7468		10.1638	39.4919		3.16474	49.3604		11.1643	30.9118		4.16341	59.9596		12.1646	42.6442		5.16493	43.3033		13.1641	37.5624		6.16362	36.3098		14.164	35.9787		7.16396	42.0478		15.1646	42.9276		8.16473	34.9677		16.1645	38.0246
1.16547	68.9394		9.16547	74.91		2.16564	40.0794		10.1654	46.2051		3.16571	44.532		11.1654	27.1153		4.16486	52.1668		12.1657	35.0393		5.16604	49.9897		13.1653	33.2887		6.16501	35.8893		14.165	37.8099		7.16528	42.85		15.1656	52.0087		8.16619	35.8237		16.1655	28.8838
1.167	72.5778		9.16721	79.2552		2.1673	40.5506		10.1668	41.499		3.1671	50.2074		11.1665	30.193		4.16653	44.541		12.1667	35.1765		5.16764	43.9565		13.1669	30.032		6.16675	30.9714		14.1665	43.688		7.16702	45.8532		15.167	49.3992		8.16723	47.5502		16.167	33.6764
1.16881	74.1405		9.16881	58.6742		2.16883	46.0918		10.1678	37.1538		3.16884	51.2423		11.1681	33.1992		4.16771	53.6371		12.1682	37.7025		5.16938	41.7257		13.1686	31.2756		6.16814	42.9126		14.1683	41.669		7.16847	38.5674		15.1689	35.1586		8.16827	52.3338		16.1688	31.541
1.16999	64.2303		9.16985	62.757		2.1698	50.5176		10.169	44.0042		3.17023	47.1923		11.1698	37.3745		4.16868	49.8704		12.17	43.2437		5.17049	31.6603		13.1696	34.7649		6.16911	36.3664		14.1695	40.151		7.16938	39.2175		15.1702	35.1795		8.16987	45.388		16.17	35.2421
1.17089	66.2612		9.17089	63.6279		2.17091	48.2838		10.1707	45.8115		3.1712	48.2868		11.1709	34.5711		4.17007	48.1317		12.1712	40.6938		5.17139	32.6713		13.1706	34.2341		6.17036	33.5422		14.1705	34.586		7.17056	32.5878		15.1711	37.5534		8.17161	41.9762		16.1709	38.0604
1.17249	49.1039		9.17256	59.551		2.17258	54.2753		10.1723	40.0615		3.17245	47.8335		11.1719	31.4158		4.17188	49.7422		12.1722	37.4043		5.17299	29.4743		13.1723	37.4759		6.17209	34.9976		14.1719	39.9363		7.17236	34.4458		15.1724	52.1787		8.17279	32.6713		16.1723	35.9459
1.17429	53.4253		9.17422	61.8116		2.17425	51.8298		10.1734	35.1854		3.17418	50.6816		11.1734	36.7213		4.17327	54.5705		12.1736	40.5894		5.17472	32.4775		13.174	37.2015		6.17362	33.229		14.1737	40.7236		7.17389	37.0971		15.1742	53.0555		8.17376	39.82		16.1741	35.4628
1.1754	49.086		9.17533	59.7121		2.17536	48.4478		10.1745	34.0492		3.17571	49.4081		11.1752	38.7911		4.17417	56.2824		12.1754	36.3068		5.17591	36.9122		13.1751	34.243		6.17452	34.6039		14.175	39.307		7.17486	40.2942		15.1756	39.2533		8.17522	42.0239		16.1754	28.2187
1.17617	58.4774		9.17631	64.275		2.17633	33.0948		10.1761	38.0693		3.17662	40.3926		11.1764	29.4475		4.17549	59.2558		12.1767	30.7388		5.17688	39.4531		13.1761	35.8237		6.17571	32.2777		14.1759	49.4767		7.17604	41.8867		15.1765	43.3093		8.17702	36.2293		16.1763	36.0235
1.17756	59.5451		9.17797	76.1685		2.17786	41.6243		10.1778	45.2955		3.17787	46.6018		11.1773	37.8337		4.17722	52.9482		12.1776	37.6459		5.1784	32.8443		13.1777	35.0512		6.17751	42.9216		14.1772	37.3834		7.17778	33.4617		15.1778	41.9285		8.17828	33.2768		16.1777	44.8273
1.17929	53.98		9.17971	68.7485		2.17966	42.7456		10.1788	43.8521		3.17967	49.7601		11.1789	37.7622		4.17868	46.2081		12.179	34.422		5.18014	36.9719		13.1795	35.0333		6.17904	41.6452		14.179	36.444		7.17938	40.2763		15.1796	40.6073		8.17918	36.6468		16.1795	42.7695
1.18061	65.2144		9.18075	64.6478		2.18085	35.8833		10.1799	32.895		3.1812	47.3116		11.1807	29.8202		4.17966	54.7942		12.1808	36.6438		5.18132	47.1177		13.1805	35.6596		6.17987	38.8716		14.1804	33.5362		7.18028	30.3869		15.181	39.316		8.18064	33.575		16.1808	36.3992
1.18158	74.3911		9.18158	49.8644		2.18175	37.0017		10.1815	39.6649		3.18203	43.7775		11.1819	30.4346		4.18084	46.4049		12.1821	36.435		5.18209	44.8213		13.1814	39.7454		6.18091	36.8675		14.1812	35.0125		7.18125	31.2339		15.1818	39.9929		8.18244	40.3329		16.1816	36.4291
1.1829	69.2078		9.18311	51.1558		2.18328	36.2322		10.1832	42.6383		3.18307	46.5839		11.1826	38.3348		4.18264	38.2393		12.183	34.3236		5.18347	40.5268		13.1828	31.7021		6.18258	37.279		14.1824	38.3825		7.18285	32.3135		15.183	35.9877		8.18369	40.0079		16.1829	33.7509
1.18464	63.6189		9.18471	60.1713		2.18508	34.2639		10.1842	36.9062		3.18467	49.086		11.184	28.2277		4.18417	47.8066		12.1842	31.6842		5.18514	35.7312		13.1845	34.2997		6.18411	31.0281		14.1841	32.6206		7.18445	24.3775		15.1846	41.4364		8.18446	42.51		16.1846	35.4002
1.18617	67.0188		9.18589	63.6875		2.18626	44.8333		10.1851	37.3983		3.1862	42.2237		11.1857	31.9019		4.185	45.1673		12.1859	32.6415		5.18646	36.1517		13.1857	39.0982		6.18515	25.8388		14.1856	31.0579		7.18549	33.5959		15.1861	38.1886		8.18578	47.1803		16.1859	41.7615
1.18714	62.4856		9.18686	56.8699		2.18709	42.7635		10.1866	35.4121		3.18724	37.6608		11.187	32.1852		4.18604	48.1556		12.1873	36.2949		5.18743	39.0088		13.1866	31.3621		6.18619	28.7913		14.1865	33.8911		7.18653	32.9994		15.1871	40.2971		8.18744	38.1648		16.1869	31.7349
1.18832	66.2583		9.18825	61.6357		2.18841	43.6791		10.1883	36.6647		3.18835	38.2185		11.188	38.7076		4.18764	42.0507		12.1883	41.2366		5.18868	42.3848		13.188	28.8957		6.18779	31.6275		14.1876	32.2479		7.18806	31.3949		15.1882	42.0567		8.18876	33.399		16.1881	32.4298
1.19006	63.1388		9.19005	75.7659		2.19015	49.5095		10.1895	35.5672		3.18995	41.9374		11.1893	36.6677		4.18917	29.8232		12.1895	40.5864		5.19042	45.4417		13.1898	40.8697		6.18946	32.904		14.1893	30.366		7.18979	34.4727		15.1898	43.9058		8.18973	28.7257		16.1898	37.7681
1.19165	59.1484		9.19151	70.7168		2.19147	52.4054		10.1904	40.145		3.19168	55.7128		11.191	36.1875		4.19021	38.63		12.1912	39.9959		5.19195	36.3545		13.1912	45.376		6.19071	41.0189		14.191	30.3451		7.19104	40.0198		15.1915	43.4942		8.19105	37.6667		16.1914	31.8333
1.19263	63.6935		9.19242	65.7334		2.19244	49.1994		10.1919	33.8344		3.1928	52.3755		11.1926	33.3782		4.19132	53.0913		12.1928	33.408		5.19292	31.3353		13.1922	38.4928		6.19161	38.7553		14.1921	24.461		7.19195	41.5229		15.1926	31.4635		8.19279	39.8737		16.1924	31.8244
1.19367	67.0038		9.19367	61.6923		2.19369	44.1384		10.1936	38.8955		3.19377	46.8105		11.1935	34.5651		4.19292	54.6183		12.1938	32.9845		5.19403	37.2403		13.1934	31.5888		6.19307	32.6087		14.1931	36.7213		7.19333	30.9326		15.1936	32.2359		8.19432	39.7126		16.1935	34.6277
1.1954	64.7939		9.1954	63.103		2.19543	47.41		10.195	34.3176		3.1953	51.8835		11.1947	34.422		4.19466	50.786		12.1948	28.1024		5.19577	36.1457		13.1952	29.5041		6.19487	39.5814		14.1946	36.6259		7.19514	29.4146		15.1952	41.2068		8.19529	36.5305		16.1952	35.5314
1.19707	62.6586		9.19693	62.8435		2.19696	40.4313		10.1959	28.3619		3.1971	47.4309		11.1965	37.4759		4.19577	50.3028		12.1964	29.0329		5.19736	31.2398		13.1967	30.0529		6.19612	36.9897		14.1964	37.2253		7.19646	24.3686		15.1969	50.2492		8.1964	30.5897		16.1968	40.1898
1.19797	64.0841		9.19783	57.5141		2.19793	37.1717		10.1972	26.1341		3.19828	46.2558		11.1981	33.7002		4.19674	57.8779		12.1982	30.6493		5.19841	38.7076		13.1976	30.9565		6.19703	33.5481		14.1976	30.7299		7.19736	29.7248		15.1981	48.1645		8.19814	30.4853		16.1979	38.8269
1.19888	60.6217		9.19908	53.5774		2.19904	43.6373		10.199	34.3504		3.19919	43.697		11.199	38.5972		4.1982	47.4637		12.1993	39.9244		5.19945	43.0618		13.1988	39.2623		6.19848	33.2469		14.1985	34.7053		7.19875	43.1661		15.199	40.7833		8.19973	33.8792		16.1989	30.035
1.20047	65.3725		9.20089	65.5932		2.20078	44.5857		10.2004	42.0627		3.20071	49.5394		11.2001	30.8969		4.2	48.8922		12.2003	32.9696		5.20118	35.6984		13.2006	39.1281		6.20029	36.1338		14.2001	38.9849		7.20056	37.8755		15.2005	39.4203		8.20078	38.4332		16.2006	31.6275
1.20214	63.6428		9.20235	72.6494		2.20237	45.7071		10.2014	40.3747		3.20252	47.0133		11.2018	36.2591		4.20125	44.4008		12.2019	35.263		5.20285	36.5692		13.2022	32.7399		6.20154	34.5413		14.2019	38.6181		7.20188	33.0561		15.2023	35.0125		8.20182	37.5773		16.2023	30.9237
1.20325	71.3342		9.20318	74.23		2.20341	42.9514		10.2027	42.519		3.20377	48.9459		11.2035	30.8432		4.20216	44.7468		12.2037	33.9746		5.20375	34.1148		13.203	37.9411		6.20237	33.6853		14.203	38.0365		7.20271	35.6835		15.2034	33.3722		8.20355	29.0031		16.2033	33.7062
1.20422	71.4654		9.20429	67.5228		2.20446	45.722		10.2044	39.7096		3.20453	52.4203		11.2044	33.736		4.20368	49.2113		12.2047	39.811		5.20466	39.0505		13.2041	40.8996		6.20362	28.5021		14.2037	47.7619		7.20396	39.5247		15.2043	41.4483		8.20522	36.4142		16.2041	33.0501
1.20575	58.7726		9.20596	59.7628		2.20619	47.1058		10.2059	36.9062		3.20585	50.4221		11.2054	39.307		4.20549	52.1161		12.2055	30.6374		5.20625	33.5929		13.2057	36.5484		6.20536	21.3147		14.2052	40.2942		7.20563	36.6677		15.2057	41.1471		8.20619	36.0891		16.2056	35.3167
1.20749	52.9183		9.20749	69.9981		2.20786	54.5676		10.2067	51.4093		3.20759	47.0372		11.2069	35.6477		4.20667	52.5545		12.207	34.6307		5.20785	35.3107		13.2073	41.8897		6.20675	28.854		14.2069	32.4805		7.20702	30.0678		15.2074	37.8427		8.20709	34.0701		16.2073	32.3343
1.20881	70.1353		9.20853	73.6246		2.20883	48.9966		10.2078	54.4483		3.20891	46.1365		11.2085	36.4798		4.2075	46.0232		12.2087	41.9971		5.20896	33.4974		13.2082	30.6255		6.20772	34.8156		14.2081	32.0391		7.20806	31.9914		15.2086	43.3093		8.20862	36.7154		16.2085	31.1354
1.20971	63.2103		9.20957	72.1573		2.20973	53.3657		10.2095	52.0743		3.20988	43.0021		11.2097	35.3495		4.20882	43.8014		12.21	33.7122		5.21	35.3614		13.2093	21.771		6.2089	35.5672		14.2091	40.6282		7.20917	35.94		15.2096	46.1395		8.21022	31.5888		16.2095	35.7014
1.2111	63.8963		9.21117	63.27		2.21133	45.9725		10.211	41.1262		3.21106	45.6504		11.2106	27.3002		4.21056	47.7142		12.211	25.8687		5.21146	33.1485		13.2109	35.3674		6.21064	33.6973		14.2104	35.1079		7.2109	32.1643		15.2109	43.3779		8.2114	32.4864		16.2109	36.5036
1.2129	55.9842		9.2129	63.1805		2.21293	35.9638		10.212	32.0719		3.2128	46.6376		11.2122	34.4786		4.21188	52.2652		12.2123	31.6902		5.21327	34.5949		13.2126	34.4458		6.21223	38.5853		14.2122	42.7367		7.2125	27.2435		15.2127	44.6275		8.21237	30.7		16.2127	40.5477
1.21422	52.2771		9.21401	66.0495		2.21404	42.0179		10.2131	35.1258		3.21439	49.1934		11.214	39.3339		4.21278	48.4329		12.2141	29.1522		5.21452	37.8278		13.2138	36.2919		6.21327	29.1492		14.2137	42.2148		7.21354	40.6848		15.2141	37.2283		8.21383	29.018		16.214	35.2958
1.21513	71.1642		9.21499	62.1039		2.21508	39.8707		10.2147	37.1597		3.21537	44.6155		11.2152	37.8666		4.21403	45.0689		12.2155	32.2419		5.21549	33.7092		13.2148	38.3079		6.21432	31.5649		14.2146	36.0354		7.21459	41.1232		15.2151	36.9897		8.21557	30.032		16.215	38.9133
1.21645	69.0855		9.21644	65.1101		2.21654	43.2795		10.2164	30.4764		3.21648	49.7929		11.2161	34.7441		4.21577	39.0535		12.2164	34.6307		5.21681	39.1818		13.2162	32.0779		6.21598	29.8143		14.2158	40.4612		7.21625	36.9241		15.2163	37.9858		8.21689	38.7135		16.2163	35.4807
1.21832	64.4092		9.21825	71.3222		2.21834	54.5139		10.2176	36.1994		3.21821	48.5254		11.2175	36.8436		4.21736	40.5029		12.2176	32.2986		5.21861	43.014		13.218	26.8588		6.21765	28.0308		14.2176	42.4981		7.21792	29.8292		15.218	37.5027		8.21779	28.171		16.2181	34.4697
1.21971	59.0053		9.21957	73.7141		2.21959	43.8073		10.2186	39.3339		3.21988	54.6988		11.2193	35.087		4.21834	46.4586		12.2194	32.9547		5.22	34.073		13.2193	22.7313		6.21869	28.0726		14.2191	33.7897		7.21903	32.8384		15.2196	34.6069		8.21918	32.3433		16.2195	29.5996
1.22047	68.3519		9.22047	80.4153		2.22057	46.1157		10.2201	31.9437		3.22085	48.1794		11.2206	31.2995		4.21938	52.2801		12.221	42.9246		5.2209	27.0526		13.2202	33.0173		6.21973	33.6674		14.2201	30.4495		7.22	31.6245		15.2206	36.8347		8.22098	40.8936		16.2204	30.873
1.22165	59.6614		9.22193	71.9038		2.22196	50.9053		10.2219	36.0861		3.22189	45.8562		11.2215	31.1086		4.22111	41.839		12.2219	38.6956		5.22222	36.0205		13.2216	38.0157		6.2214	41.3022		14.2212	29.7397		7.2216	45.4357		15.2217	45.7787		8.22244	30.2974		16.2217	33.2797
1.22332	57.86		9.22374	53.1122		2.22376	53.2941		10.2231	36.6527		3.22356	43.5002		11.2229	30.2378		4.22278	42.4802		12.2231	40.2971		5.22403	38.305		13.2235	35.2182		6.22314	36.4768		14.223	30.4734		7.2234	43.9714		15.2234	42.4683		8.22328	29.8083		16.2235	39.8975
1.22478	63.9798		9.22499	59.9864		2.22508	48.6834		10.224	33.0948		3.2253	35.5075		11.2247	26.6799		4.22382	46.1127		12.2249	41.4573		5.22542	40.3806		13.2247	36.2173		6.22411	31.9228		14.2246	34.0104		7.22445	32.3254		15.2251	32.564		8.22459	30.9833		16.225	36.948
1.22582	75.0323		9.22575	70.3053		2.22598	44.2249		10.2255	39.0714		3.22627	36.6647		11.2261	25.9223		4.22486	57.9942		12.2264	38.8895		5.22625	52.8975		13.2255	32.3105		6.22494	28.7585		14.2254	35.263		7.22528	27.8251		15.226	38.9462		8.2264	43.3928		16.2258	29.5429
1.22693	62.3812		9.22707	65.8109		2.22737	41.8987		10.2273	45.8413		3.22717	39.7514		11.2269	30.3272		4.22653	53.7981		12.2273	33.3245		5.22736	50.6518		13.2268	31.1235		6.22647	29.9723		14.2264	30.4346		7.22674	31.7379		15.2269	42.2327		8.22786	37.4431		16.2269	31.6156
1.22867	56.0528		9.22874	73.1981		2.22918	54.5735		10.2285	43.0081		3.2287	32.4924		11.2281	32.4685		4.2282	47.0074		12.2283	25.6062		5.22903	41.9225		13.2285	24.634		6.22807	28.0935		14.228	32.3791		7.2284	29.3729		15.2285	47.1296		8.22862	33.2708		16.2286	26.9155
1.23033	58.0807		9.23006	72.2527		2.23057	58.4386		10.2293	35.1497		3.2303	43.2467		11.2297	43.2168		4.22917	49.6765		12.23	25.3855		5.23056	42.0507		13.2299	30.6195		6.22932	38.7791		14.2296	37.1418		7.22965	32.051		15.2301	48.9697		8.22973	40.6371		16.2301	30.5241
1.23138	58.4953		9.23103	60.7171		2.2314	48.2838		10.2306	31.6782		3.23148	45.2478		11.2313	40.5924		4.23007	47.5412		12.2316	36.7303		5.23153	37.0106		13.2309	28.6005		6.23029	37.7562		14.2307	34.5949		7.23063	43.6165		15.2312	41.1471		8.23147	37.962		16.2311	33.8822
1.23242	48.7908		9.23228	55.3191		2.23258	43.2049		10.2323	34.2639		3.23252	41.2217		11.2323	37.6339		4.2316	42.2714		12.2326	35.3077		5.23264	41.0159		13.2321	33.1455		6.23168	30.5599		14.2317	37.6966		7.23195	40.2524		15.2322	32.0838		8.23293	26.7007		16.2322	39.4412
1.23402	53.0197		9.23401	77.609		2.23425	37.4848		10.2336	33.0948		3.23398	40.1331		11.2334	36.9122		4.23327	52.972		12.2337	38.5972		5.23431	36.8138		13.2338	39.7066		6.23341	30.6463		14.2332	36.775		7.23375	33.1903		15.2337	34.413		8.23397	26.987		16.2338	32.0689
1.23575	59.1872		9.23561	76.7143		2.23571	40.0407		10.2346	33.4766		3.23571	39.9572		11.2351	32.1196		4.23438	59.2498		12.2352	37.8785		5.23597	35.8535		13.2354	34.1923		6.2348	42.1372		14.235	32.0749		7.23514	25.2573		15.2355	33.9746		8.23508	35.8833		16.2355	33.1843
1.23686	67.6808		9.23658	68.7515		2.23675	39.9244		10.2359	35.254		3.23703	43.5598		11.2367	30.7627		4.23542	58.2567		12.237	42.3639		5.23709	40.0108		13.2364	35.8177		6.23577	42.1134		14.2362	39.7365		7.23604	34.1536		15.2368	37.2253		8.23675	41.0099		16.2366	33.1396
1.23783	51.2602		9.23763	66.7861		2.23786	42.8381		10.2376	35.928		3.23793	46.4258		11.2379	32.9636		4.23688	51.8268		12.2382	30.9863		5.23806	34.1655		13.2374	32.1793		6.23702	36.4589		14.2371	35.26		7.23729	42.9842		15.2377	43.9415		8.23841	38.9998		16.2376	34.8962
1.23943	57.1622		9.23936	66.5088		2.23953	41.8241		10.2391	32.394		3.23925	44.7408		11.2388	37.2104		4.23861	60.8424		12.2391	29.7874		5.23966	31.7319		13.2391	24.965		6.23876	38.6658		14.2385	32.5968		7.23903	43.8372		15.2391	45.6116		8.23946	32.397		16.239	28.5259
1.24124	65.9958		9.24103	60.5143		2.24119	38.29		10.2401	38.0544		3.24106	51.9729		11.2404	32.6415		4.23993	53.142		12.2405	36.4589		5.24139	40.9383		13.2408	28.7556		6.24029	38.9879		14.2403	33.0948		7.24056	41.3171		15.2409	41.6422		8.2405	29.9485		16.2409	35.0274
1.24228	65.0295		9.24207	62.6258		2.2423	41.165		10.2413	37.8427		3.24252	57.4485		11.2422	32.8055		4.24084	42.7844		12.2423	29.2118		5.24257	32.8771		13.2419	36.2621		6.24119	42.3072		14.2417	38.6121		7.24153	29.1522		15.2422	37.792		8.24203	36.435		16.2421	37.5981
1.24311	58.5102		9.24311	71.701		2.24328	41.0576		10.243	29.531		3.24342	44.6901		11.2433	26.8707		4.24216	42.182		12.2437	30.9774		5.24347	33.0292		13.2429	33.2618		6.24244	36.5752		14.2426	40.1272		7.24264	27.3449		15.2431	38.8298		8.24383	40.2435		16.2429	39.1251
1.24457	59.9954		9.24478	79.1836		2.24487	40.2226		10.2446	26.9065		3.24467	38.7881		11.2443	27.6372		4.24396	46.8076		12.2446	32.567		5.24507	34.4935		13.2446	27.6163		6.24425	30.2139		14.244	30.4942		7.24445	28.2694		15.2445	42.4981		8.24501	34.2937		16.2445	32.8652
1.24624	66.6817		9.24644	68.999		2.24661	41.7943		10.2456	35.6119		3.24648	41.8539		11.2459	32.1494		4.24542	44.5261		12.246	28.517		5.24681	32.9069		13.2462	25.0813		6.24571	25.4452		14.2458	28.7973		7.24604	28.1531		15.2463	34.1685		8.24591	32.9248		16.2463	27.0348
1.24749	65.4023		9.24742	64.3913		2.24779	37.8158		10.2467	36.772		3.24793	48.8147		11.2476	34.5263		4.24632	57.9972		12.2478	28.344		5.24792	31.0281		13.2473	31.2547		6.24654	28.0756		14.2471	39.7394		7.24688	31.5768		15.2477	34.756		8.24751	40.9294		16.2475	40.6401
1.24846	57.362		9.24839	56.8252		2.24869	40.3896		10.2484	45.546		3.24877	46.4169		11.2487	35.6805		4.24757	50.4311		12.2491	31.7886		5.24875	33.2648		13.2481	28.4603		6.24765	25.9701		14.2479	32.8354		7.24792	31.9019		15.2484	43.5121		8.24925	40.0943		16.2483	46.9835
1.24985	59.2409		9.24992	60.899		2.25022	47.3652		10.2501	38.0574		3.24988	43.2586		11.2495	35.5463		4.24945	47.5442		12.2499	34.8216		5.25014	39.5247		13.2496	25.4869		6.24925	31.1384		14.2492	43.4316		7.24952	34.6934		15.2496	47.6903		8.25043	37.8367		16.2496	35.9966
1.25165	60.7469		9.25151	72.5331		2.25203	46.8583		10.251	31.8154		3.25155	40.4671		11.251	34.1476		4.25091	47.4845		12.2512	33.1903		5.25188	28.9315		13.2513	39.4919		6.25078	32.0361		14.2508	37.9978		7.25111	27.4761		15.2513	46.7449		8.25119	38.9879		16.2513	34.249
1.25304	57.8928		9.25269	73.4397		2.25314	47.8573		10.2519	40.2882		3.25307	40.3747		11.2526	26.662		4.25167	43.5837		12.2528	30.3123		5.25313	33.1545		13.2525	36.0324		6.25189	34.8186		14.2523	34.2162		7.25215	30.1722		15.2527	43.6702		8.25258	42.9425		16.2527	28.2396
1.25395	61.2032		9.25367	67.2066		2.25397	41.4066		10.2535	40.2584		3.25405	37.8158		11.254	27.5298		4.25278	41.8181		12.2542	27.5328		5.2541	28.851		13.2535	33.3245		6.25293	35.3465		14.2533	32.5431		7.2532	29.5459		15.2537	42.349		8.25425	48.8057		16.2536	27.7416
1.2552	48.9608		9.25513	64.102		2.25543	38.2095		10.2551	36.9092		3.25516	48.4329		11.2549	25.302		4.25445	43.9117		12.2552	34.6606		5.25542	30.9028		13.2549	33.915		6.25452	30.9983		14.2544	36.602		7.25472	35.2779		15.2549	44.374		8.25557	38.5495		16.2549	26.823
1.257	57.6006		9.25686	60.3741		2.25709	44.5082		10.2563	41.5318		3.25682	46.5541		11.2563	24.2135		4.25597	41.845		12.2564	26.7037		5.25716	30.87		13.2566	28.6392		6.25619	30.7328		14.2561	43.9863		7.25653	33.1068		15.2566	43.1095		8.25647	36.9689		16.2566	33.1903
1.25853	57.3859		9.25825	61.8742		2.25834	42.7486		10.2572	33.3722		3.25849	45.5609		11.2581	33.1485		4.25695	47.4786		12.2581	30.1692		5.25868	36.9271		13.258	22.8327		6.25737	30.5092		14.2577	37.0464		7.25771	30.6642		15.2582	48.1049		8.25779	32.4328		16.2581	32.8503
1.25943	59.2886		9.25915	68.1013		2.25932	40.1152		10.2587	26.987		3.2596	37.121		11.2595	40.9234		4.25806	50.9261		12.2597	33.9358		5.25959	37.109		13.2589	27.0407		6.25834	37.1925		14.2587	32.9696		7.25861	40.4105		15.2593	45.4685		8.25959	35.2749		16.2591	36.1875
1.26061	53.5267		9.2604	59.7508		2.26064	39.143		10.2604	26.3011		3.26057	39.1728		11.2604	39.3637		4.25966	43.7507		12.2607	34.1715		5.26077	33.6466		13.2603	25.818		6.2598	39.978		14.2598	35.1705		7.26007	35.5881		15.2603	42.6412		8.26105	38.2662		16.2602	42.9365
1.26235	55.4205		9.26221	67.6957		2.26237	46.7837		10.2618	33.2141		3.2621	49.3783		11.2616	27.5537		4.26139	49.2262		12.2618	35.0632		5.2625	34.3921		13.262	36.8794		6.26161	34.5114		14.2615	33.9508		7.26188	37.6548		15.2619	44.1026		8.26196	38.3795		16.262	36.107
1.26395	52.8169		9.26367	74.7967		2.2639	45.209		10.2627	38.2841		3.26391	49.4022		11.2633	22.7342		4.2625	54.5526		12.2635	37.1925		5.2641	35.096		13.2635	34.0134		6.26286	32.1852		14.2631	39.0953		7.2632	33.1008		15.2636	43.7059		8.26314	32.9308		16.2636	43.6612
1.26478	58.8174		9.26457	76.768		2.2648	38.8149		10.264	35.7491		3.26509	43.1542		11.2649	28.4305		4.26347	49.1874		12.2651	34.4786		5.26507	34.2192		13.2644	34.3265		6.26376	30.8641		14.2642	41.1262		7.2641	34.7351		15.2648	34.5681		8.26487	39.4561		16.2646	48.6476
1.26582	66.5356		9.26589	68.9185		2.26598	40.1331		10.2659	28.3887		3.26599	47.3951		11.2659	34.1088		4.265	41.839		12.2662	31.2607		5.26618	37.4639		13.2657	43.1363		6.26529	35.1079		14.2652	39.1639		7.26549	43.4256		15.2657	39.5277		8.26647	41.5855		16.2657	37.7025
1.26742	55.3459		9.26769	74.0063		2.26772	45.728		10.2673	35.6596		3.26752	43.8759		11.267	31.2995		4.26674	50.1776		12.2672	35.4568		5.26792	40.8697		13.2675	38.4928		6.26709	40.8399		14.2669	35.5195		7.26736	36.7631		15.2673	45.5997		8.26751	35.8326		16.2674	32.0928
1.26902	53.7265		9.26915	71.021		2.26925	40.2047		10.2682	35.2332		3.26932	36.0026		11.2688	28.8957		4.26792	53.8578		12.2689	37.4103		5.26952	44.0191		13.2689	35.266		6.26827	34.592		14.2686	34.6695		7.26861	34.3981		15.2691	47.2012		8.26855	30.9893		16.269	32.8741
1.27013	67.2931		9.26992	65.2383		2.27022	38.3885		10.2695	29.9932		3.2705	39.8498		11.2704	27.163		4.26889	49.6378		12.2705	33.3931		5.27042	39.9929		13.2698	42.6144		6.26904	39.3428		14.2696	32.4626		7.26938	30.8253		15.2701	38.6509		8.27029	36.0473		16.27	39.6052
1.27117	73.7558		9.27103	65.7662		2.2714	44.6543		10.2713	32.8891		3.27134	40.4552		11.2713	29.3192		4.27049	42.4772		12.2716	34.1386		5.27139	35.6089		13.2708	36.4499		6.27036	31.9824		14.2705	35.5851		7.27063	28.2247		15.2709	39.3667		8.27196	36.6527		16.2709	37.8964
1.2727	58.5549		9.27269	68.4294		2.27314	42.9723		10.2727	35.2033		3.27266	37.0822		11.2722	31.2458		4.27222	42.0478		12.2724	40.1778		5.27299	30.9983		13.2726	31.6424		6.27202	35.2719		14.2719	38.4779		7.27236	31.1176		15.2724	39.8289		8.27286	48.2063		16.2725	39.3875
1.27443	58.9963		9.27415	63.7382		2.27473	47.3802		10.2736	37.1776		3.27439	38.4302		11.2738	33.0322		4.27341	44.8243		12.2739	33.1575		5.27452	29.2059		13.2741	28.5587		6.27341	38.4093		14.2736	25.809		7.27375	34.7888		15.2741	41.3559		8.27383	37.5534		16.274	31.7379
1.27561	57.2278		9.27519	63.1298		2.27564	41.1769		10.2747	42.853		3.27571	32.8413		11.2754	37.1925		4.27424	45.8025		12.2756	30.4048		5.27563	31.1802		13.2751	28.514		6.27439	37.2015		14.2748	32.3224		7.27472	37.3685		15.2753	41.8181		8.27543	39.8647		16.2752	34.1386
1.27652	51.7015		9.27637	61.4925		2.27661	36.5752		10.2763	42.0329		3.27668	43.0797		11.2765	32.8503		4.27556	50.3834		12.2768	28.8987		5.27667	37.9739		13.2762	38.4571		6.27564	35.1884		14.2758	34.3504		7.2759	36.7482		15.2763	38.4779		8.27703	42.689		16.2762	34.58
1.27797	45.7637		9.27797	55.5308		2.27821	38.6777		10.2778	36.5513		3.27794	49.5692		11.2776	25.8209		4.27723	54.5974		12.2777	39.1549		5.2782	38.8269		13.2778	46.6614		6.2773	31.0818		14.2771	37.5922		7.27757	36.4649		15.2776	50.2372		8.27814	47.2847		16.2777	34.422
1.27985	48.6148		9.27964	66.6937		2.2798	37.3357		10.2788	38.0813		3.27967	54.8568		11.2791	33.1903		4.27854	58.2686		12.2792	34.0313		5.27993	38.1916		13.2795	40.2285		6.2789	40.9264		14.279	27.4075		7.27917	35.9131		15.2793	48.8206		8.27911	39.5009		16.2794	27.6282
1.2811	54.5318		9.28075	70.1293		2.28091	38.2393		10.2799	44.6126		3.2812	49.1785		11.2808	41.0964		4.27952	50.8039		12.281	29.9485		5.28118	37.0404		13.2806	36.8138		6.27987	36.441		14.2803	29.4832		7.28021	30.3809		15.2809	55.5875		8.28064	30.5956		16.2807	28.0308
1.282	53.9949		9.28172	66.4551		2.28189	39.987		10.2816	36.6736		3.28217	53.0734		11.2821	33.2171		4.28077	43.2198		12.2823	40.2673		5.28209	42.7725		13.2816	34.3146		6.28098	36.1964		14.2813	33.9955		7.28132	32.7638		15.2818	53.0973		8.28237	39.0058		16.2816	27.9503
1.28339	54.32		9.28325	71.1523		2.28341	40.2047		10.2833	26.4681		3.28328	62.5363		11.283	34.6397		4.2825	40.655		12.2832	36.7303		5.28354	40.4731		13.283	34.082		6.28272	39.6768		14.2825	35.9787		7.28292	32.9845		15.283	41.6988		8.28369	38.4869		16.283	24.3447
1.28527	50.8635		9.28506	66.2344		2.28522	41.0904		10.2844	30.5002		3.28502	46.0739		11.2844	33.4289		4.28403	49.9807		12.2845	28.7436		5.28528	36.3128		13.2848	37.2283		6.28432	33.0233		14.2843	33.0203		7.28458	32.9905		15.2848	39.9393		8.28452	34.8842		16.2848	29.9067
1.28652	63.5235		9.28624	63.5086		2.28647	52.2861		10.2854	39.6291		3.28662	39.1549		11.2862	38.7314		4.285	49.2232		12.2863	34.8991		5.2866	32.5431		13.286	27.9802		6.28536	34.1625		14.2858	38.8328		7.2857	30.3362		15.2863	48.4299		8.28591	38.1886		16.2862	35.4181
1.28728	55.674		9.28721	70.9942		2.28737	45.725		10.287	45.3224		3.28759	39.4412		11.2875	30.035		4.28611	47.2281		12.2878	31.4247		5.2875	28.4275		13.2869	26.5755		6.2864	22.3615		14.2867	31.6961		7.28667	26.6232		15.2873	41.1471		8.28772	45.1643		16.2871	37.1508
1.28853	49.5423		9.28874	65.3874		2.28883	45.3731		10.2888	46.3811		3.2887	40.3657		11.2884	26.6441		4.28785	45.9576		12.2887	30.533		5.28889	32.6863		13.2885	29.4445		6.28807	29.9425		14.2879	29.5936		7.28834	34.7291		15.2884	35.7998		8.28911	47.3802		16.2884	36.1964
1.29027	53.8757		9.29054	56.4076		2.29064	50.3118		10.2899	38.2244		3.29043	36.3545		11.2898	30.3809		4.28945	48.6119		12.29	37.5474		5.29077	32.8234		13.2903	38.7463		6.28973	32.1614		14.2897	30.5718		7.29007	33.8344		15.2902	42.0567		8.29001	46.5809		16.2902	35.5552
1.29165	71.1493		9.29165	61.4508		2.29196	40.2226		10.2908	30.6881		3.29203	38.3676		11.2917	37.4073		4.29049	42.0329		12.2918	31.3591		5.29209	26.5904		13.2915	38.5406		6.29071	33.6197		14.2913	32.0182		7.29111	28.3022		15.2918	42.5876		8.29133	35.9877		16.2916	35.758
1.29263	65.4888		9.29242	66.3477		2.29286	41.9881		10.2924	30.2139		3.293	39.1937		11.293	34.8007		4.2916	42.2923		12.2933	27.6342		5.29285	43.4017		13.2923	33.0501		6.29161	35.4867		14.2921	35.8982		7.29195	27.1809		15.2926	45.4685		8.29314	36.3277		16.2924	33.2738
1.29388	52.9064		9.29381	73.1743		2.29425	52.635		10.2942	36.0473		3.29391	41.3588		11.2938	38.3497		4.29334	47.7589		12.2942	29.8292		5.29403	43.4644		13.2937	30.0499		6.29314	38.0336		14.2931	32.8443		7.2934	23.0205		15.2936	41.1859		8.29453	37.7174		16.2935	35.77
1.29554	59.3154		9.29547	61.5223		2.29612	50.5205		10.2953	44.4068		3.2955	51.3168		11.295	40.7773		4.29493	50.1478		12.2952	26.9841		5.29577	41.4752		13.2953	32.4924		6.29473	31.723		14.2948	34.6188		7.29507	32.7161		15.2952	42.2357		8.29536	35.9489		16.2952	40.6103
1.29714	61.5194		9.29679	60.398		2.29744	46.4616		10.2961	43.8014		3.2971	40.6789		11.2967	33.235		4.29591	57.5797		12.2969	28.511		5.29722	36.3098		13.2966	22.3883		6.29591	35.4538		14.2963	42.5577		7.29625	41.3767		15.2968	35.2898		8.29647	33.915		16.2967	33.5124
1.29818	62.7302		9.29776	62.7719		2.29821	37.9292		10.2975	41.9822		3.29828	39.4293		11.2981	28.177		4.29681	63.5801		12.2985	33.1008		5.2982	38.9163		13.2976	24.6131		6.29689	37.7652		14.2974	42.3937		7.29722	44.4187		15.2978	31.3233		8.29814	35.6686		16.2977	32.4984
1.29922	53.6341		9.29908	61.5343		2.29946	37.5057		10.2992	36.1726		3.29925	40.2971		11.2991	33.0769		4.29834	57.2308		12.2995	35.8863		5.29931	38.0216		13.2989	29.9246		6.29834	30.712		14.2984	38.0365		7.29861	31.884		15.2989	40.4522		8.29959	37.2969		16.2988	35.2332
1.30089	52.131		9.30082	67.5675		2.30112	37.2552		10.3004	24.5296		3.30078	47.2251		11.3003	41.9911		4.3	57.2427		12.3005	29.9157		5.30097	34.9946		13.3006	29.3878		6.30008	32.2061		14.3	24.5743		7.30035	41.0964		15.3004	47.3086		8.30064	43.181		16.3004	28.8689
1.30263	69.2346		9.30228	57.2695		2.30258	33.6317		10.3014	28.2426		3.30252	46.3483		11.3019	37.6757		4.30111	50.3058		12.3021	35.9787		5.30264	39.3368		13.3022	25.8329		6.3014	39.9542		14.3017	29.5548		7.30174	39.1847		15.3021	49.098		8.30175	42.182		16.3021	38.1529
1.30367	66.5267		9.30325	54.9225		2.30362	44.3471		10.3027	35.8923		3.30377	33.2678		11.3036	33.3185		4.30209	46.3006		12.3039	38.979		5.30368	36.5752		13.3032	35.1377		6.30237	27.1511		14.3029	37.0047		7.30271	28.1889		15.3034	42.0597		8.30341	37.4341		16.3032	30.4465
1.30464	58.5639		9.30443	57.016		2.30473	42.9961		10.3045	29.1969		3.30474	40.1033		11.3047	38.7881		4.30361	55.2326		12.3051	36.951		5.30466	33.918		13.3043	33.408		6.30369	30.0141		14.3039	38.0067		7.30396	27.5954		15.3043	34.4578		8.30508	44.1593		16.3042	30.8611
1.30631	55.4235		9.30617	61.1585		2.30647	32.2568		10.306	35.9549		3.30606	49.8943		11.3057	38.3378		4.30535	49.8913		12.306	28.5617		5.30632	40.0586		13.306	35.4598		6.30543	36.3187		14.3053	40.0407		7.3057	35.2182		15.3057	40.2464		8.30612	44.9585		16.3057	30.1632
1.30804	60.7768		9.30776	73.8334		2.30814	43.0946		10.3069	37.7145		3.30787	44.3412		11.3073	40.3359		4.30667	50.7711		12.3075	31.1474		5.30806	39.4502		13.3076	37.619		6.30689	35.2391		14.3071	41.5348		7.30722	37.9411		15.3075	48.1496		8.30716	39.8737		16.3075	34.7977
1.30908	55.7098		9.30874	65.62		2.30918	46.5272		10.3081	35.6447		3.30925	53.9562		11.309	24.5296		4.30757	49.438		12.3093	32.5371		5.30917	35.3465		13.3086	29.4803		6.30779	30.2915		14.3084	38.9163		7.30813	38.633		15.3089	36.1428		8.30876	34.5651		16.3087	33.2797
1.30992	54.0039		9.30978	58.8681		2.31022	47.8872		10.3099	38.8716		3.31016	53.1211		11.3101	27.7863		4.30896	48.0512		12.3105	30.0618		5.31014	33.0829		13.3096	36.3098		6.30911	34.1058		14.3094	29.3818		7.30931	42.51		15.3098	40.0914		8.3105	34.7172		16.3096	29.6353
1.31145	58.9933		9.31158	74.5551		2.31182	49.2739		10.3114	40.5119		3.31148	55.6829		11.3111	31.1802		4.31077	47.9587		12.3114	35.257		5.31174	35.8356		13.3114	37.8904		6.31084	36.2621		14.3108	27.6968		7.31111	36.3992		15.3111	41.2455		8.31161	34.6963		16.3111	34.929
1.31311	48.0721		9.31325	82.3389		2.31355	38.2453		10.3124	40.8161		3.31328	43.0289		11.3127	31.1891		4.31216	35.6149		12.3129	36.8824		5.31354	36.5245		13.3131	33.3245		6.3123	36.8436		14.3126	30.8313		7.31264	30.3928		15.313	36.948		8.31258	37.783		16.3129	34.243
1.31429	48.8206		9.31415	75.1068		2.31466	39.1788		10.3136	37.6339		3.31474	45.3224		11.3144	25.5734		4.31306	49.4171		12.3147	32.4835		5.31459	35.77		13.3141	40.0049		6.31314	33.6615		14.3138	36.1756		7.31347	34.4876		15.3143	36.6587		8.31418	44.6305		16.3141	34.4876
1.31527	49.3336		9.31505	67.7524		2.31564	42.4981		10.3153	35.1884		3.31557	37.8427		11.3155	27.2465		4.31438	51.2363		12.316	34.0104		5.31542	44.4396		13.315	34.1088		6.31425	37.9411		14.3146	30.7299		7.31458	42.1044		15.3151	38.1857		8.31591	49.3574		16.3149	41.9672
1.31665	51.8507		9.31665	73.723		2.31723	39.2832		10.3169	31.541		3.31668	42.7486		11.3164	39.31		4.31618	39.6619		12.3167	37.5117		5.31688	45.6504		13.3165	29.7934		6.31591	37.2224		14.3159	30.8849		7.31625	48.4478		15.3164	45.042		8.31703	36.444		16.3163	41.7734
1.31839	50.1507		9.31832	70.5975		2.31897	38.7374		10.3178	39.2682		3.31842	43.6224		11.3179	38.627		4.31757	34.3832		12.318	40.0675		5.31854	37.3596		13.3182	38.4779		6.31744	34.2371		14.3176	30.0767		7.31778	41.7376		15.318	40.154		8.31786	37.4431		16.3179	37.7622
1.31978	50.8575		9.31943	60.9348		2.32001	45.3492		10.3187	40.2673		3.31988	40.6759		11.3195	34.2937		4.31841	48.6685		12.3197	40.652		5.31972	41.0427		13.3193	37.2164		6.31848	45.0539		14.319	33.572		7.31882	40.4284		15.3194	36.3098		8.31925	43.0767		16.3193	32.5819
1.32075	45.6355		9.3204	59.9924		2.32084	42.7635		10.3203	40.2256		3.32085	45.4029		11.3207	35.6626		4.31952	41.7257		12.3211	31.4605		5.3207	38.9163		13.3203	32.397		6.31959	43.3838		14.32	36.5454		7.31986	35.3047		15.3204	36.5006		8.32098	40.1093		16.3202	32.8592
1.322	42.9067		9.32186	64.6985		2.3223	55.6114		10.322	40.0675		3.32203	43.9833		11.3217	34.1655		4.32125	37.4878		12.3221	34.1446		5.32209	33.2827		13.3218	34.2102		6.32119	27.9563		14.3212	38.4242		7.32146	35.94		15.3216	41.1024		8.32223	37.458		16.3215	32.0361
1.32381	60.1057		9.3236	70.4812		2.32397	49.5036		10.3231	33.1366		3.3237	37.8994		11.3231	42.3221		4.32271	39.5158		12.3233	30.0022		5.32389	42.516		13.3236	35.2212		6.32286	25.4243		14.3229	38.1409		7.3232	31.1295		15.3233	43.4137		8.32321	39.4353		16.3233	34.2967
1.32533	65.7364		9.32492	76.6845		2.32522	48.5284		10.324	39.8886		3.32537	40.3598		11.3249	29.2894		4.32368	39.3368		12.3251	29.0627		5.32528	40.5119		13.3248	41.5467		6.32397	31.5082		14.3245	45.2329		7.32438	37.7115		15.3249	48.4657		8.32452	35.7938		16.3247	36.4917
1.32624	50.5355		9.32582	69.172		2.32619	50.8098		10.3256	39.8051		3.32641	44.5171		11.3263	29.6681		4.32486	40.4254		12.3267	31.1504		5.32625	33.9299		13.3258	33.7539		6.32494	35.9489		14.3255	39.0147		7.32535	36.5573		15.3259	40.327		8.32626	34.4488		16.3257	30.8641
1.32749	61.248		9.32721	60.2041		2.32758	47.8842		10.3273	31.0251		3.32745	43.1482		11.3272	37.2999		4.32653	45.549		12.3276	31.7766		5.32743	40.7117		13.3271	29.9783		6.32654	35.7998		14.3265	32.0301		7.32681	32.2986		15.327	44.195		8.32772	39.9929		16.3269	35.8744
1.32922	61.4209		9.32901	68.158		2.32932	42.7695		10.3286	32.9875		3.32905	41.2992		11.3285	44.702		4.32813	46.9984		12.3287	29.2029		5.32917	39.8617		13.3289	38.1797		6.32827	43.1572		14.3282	30.8342		7.32854	35.5433		15.3286	38.0187		8.32869	36.8287		16.3286	42.1432
1.33075	55.0328		9.3304	61.2718		2.33071	42.3371		10.3295	44.2278		3.33078	35.9459		11.3302	45.2388		4.32924	47.8812		12.3304	34.3683		5.3307	35.1586		13.3303	34.8097		6.32946	37.5504		14.3299	32.0868		7.32979	40.5268		15.3303	45.7876		8.32987	32.7012		16.3302	33.7241
1.33158	54.9553		9.33131	74.5163		2.33168	44.6126		10.3309	43.3689		3.33196	37.5385		11.3317	38.7284		4.33021	51.7254		12.332	39.5068		5.33167	29.2536		13.3313	36.0772		6.33043	39.2653		14.331	38.4779		7.3307	30.8491		15.3314	37.0554		8.33161	42.7218		16.3312	31.4337
1.33263	51.8775		9.33263	73.0281		2.33293	42.9783		10.3327	37.0882		3.33287	48.5105		11.3326	33.8762		4.33181	49.6258		12.333	37.0106		5.33285	34.3236		13.3326	36.9033		6.33196	33.408		14.3319	30.6434		7.33222	28.3768		15.3324	39.9393		8.33314	32.6415		16.3323	24.5356
1.33429	54.6033		9.3345	71.9366		2.33466	40.9533		10.334	33.7539		3.33446	51.293		11.3338	46.2737		4.33354	46.9746		12.3342	31.9228		5.33465	31.5142		13.3344	39.3875		6.33376	33.572		14.3336	34.6248		7.33403	30.2676		15.334	51.8686		8.33411	41.6541		16.334	30.4704
1.33582	57.186		9.33582	62.4647		2.33619	42.0985		10.3349	35.8982		3.33627	40.9443		11.3356	44.8541		4.33472	40.8697		12.3358	37.9023		5.33618	31.0132		13.3358	42.3758		6.33487	39.2682		14.3353	29.6055		7.33528	41.1292		15.3358	53.315		8.33529	37.2701		16.3357	37.0822
1.33686	62.1576		9.33665	57.2725		2.33716	36.5513		10.3363	45.4655		3.33738	37.0852		11.3372	38.7702		4.33563	49.7362		12.3375	43.8014		5.33709	34.079		13.3366	39.5426		6.33571	36.6826		14.3364	37.4759		7.33604	30.9625		15.3368	39.5456		8.33703	38.135		16.3365	37.7174
1.3379	52.3398		9.33783	57.6304		2.33834	46.1634		10.3381	46.2648		3.33821	43.5628		11.3381	40.7654		4.33722	40.8847		12.3385	36.8377		5.33806	35.4002		13.3378	34.9498		6.33709	32.6892		14.3372	44.9734		7.33736	35.2063		15.3376	44.195		8.33862	43.187		16.3375	33.0054
1.3395	55.7217		9.3395	60.1057		2.34008	41.8778		10.3395	36.3963		3.3396	62.0323		11.339	35.8386		4.33903	43.9654		12.3394	35.3525		5.33972	33.3782		13.3395	32.6445		6.33876	39.4382		14.3387	38.9968		7.33903	29.3878		15.3391	47.7679		8.33953	40.0914		16.3391	47.6486
1.34124	49.3217		9.34096	65.3546		2.34161	48.0214		10.3403	35.2272		3.34134	52.125		11.3407	30.7328		4.34007	47.3205		12.3409	31.5738		5.34125	42.8918		13.341	37.1329		6.34001	39.6112		14.3404	37.7741		7.34042	36.4529		15.3408	46.6823		8.3405	46.3125		16.3407	50.1328
1.34242	58.7219		9.34193	73.1772		2.34251	46.3721		10.3415	37.7562		3.34259	38.0843		11.3422	32.722		4.34091	49.9122		12.3425	35.603		5.34229	42.7904		13.342	40.664		6.34098	31.2011		14.3416	42.2446		7.34139	42.85		15.342	54.8091		8.34209	48.0005		16.3418	44.0638
1.34339	53.4283		9.34311	68.4443		2.34355	53.8339		10.3431	35.7282		3.34356	44.2487		11.3433	32.5729		4.34236	40.5417		12.3437	36.3992		5.34334	42.5548		13.3431	39.644		6.3423	29.7755		14.3426	39.4084		7.34264	41.1859		15.343	50.3476		8.34369	44.544		16.3428	36.7094
1.34485	53.6997		9.34471	62.0711		2.34515	48.7789		10.3446	33.3125		3.34488	57.2845		11.3444	37.2164		4.34403	45.0539		12.3447	34.3981		5.34493	35.8893		13.3447	37.0136		6.34404	31.1086		14.344	27.0437		7.34431	36.5722		15.3443	45.5878		8.3448	38.4779		16.3443	36.9778
1.34665	57.0787		9.34637	56.9355		2.34675	44.6454		10.3456	37.9023		3.34662	44.9317		11.3459	32.1345		4.34535	46.9656		12.3462	33.3632		5.34667	38.2334		13.3464	30.0171		6.3455	36.8048		14.3458	29.7367		7.3459	27.9831		15.3461	42.9633		8.34585	30.7597		16.3461	42.6025
1.3479	60.6217		9.34749	52.1996		2.34786	40.3985		10.3468	40.2912		3.34814	49.4171		11.3476	31.2875		4.34632	48.4508		12.3479	28.7496		5.34785	31.2905		13.3476	33.9239		6.34654	29.4773		14.3471	34.3623		7.34688	27.8459		15.3475	46.0113		8.34737	34.0283		16.3473	33.915
1.34881	52.2115		9.34846	58.7279		2.3489	46.0739		10.3484	37.5773		3.34905	47.41		11.3489	31.7379		4.34764	50.3386		12.3492	32.9934		5.34882	43.9684		13.3485	37.1747		6.34765	36.8377		14.3481	36.4201		7.34799	28.4424		15.3484	35.77		8.34911	42.8858		16.3483	27.1093
1.35027	51.7493		9.35013	58.036		2.35043	52.1489		10.3501	42.4802		3.35023	38.5316		11.3498	25.5794		4.34938	46.6883		12.3502	25.1529		5.35028	41.2903		13.3501	31.1116		6.34939	40.1391		14.3493	31.5172		7.34965	33.0948		15.3497	36.8913		8.35029	43.7656		16.3497	37.8367
1.35207	47.4458		9.35186	62.0204		2.35216	52.0236		10.3511	43.524		3.35203	37.3446		11.3513	26.9393		4.35084	42.4623		12.3515	26.832		5.35209	34.8007		13.3518	35.3823		6.35098	39.2175		14.3511	25.3676		7.35132	42.4593		15.3515	43.4077		8.35119	36.3814		16.3515	32.892
1.35332	53.2285		9.35297	58.7696		2.35341	47.3831		10.3522	36.3247		3.35356	39.3637		11.3531	25.3766		4.35174	51.1498		12.3533	26.5785		5.35334	39.7663		13.353	40.5805		6.35196	40.7355		14.3526	30.0618		7.35236	34.8097		15.353	48.7908		8.35265	42.2655		16.3528	35.1735
1.35415	50.4549		9.35388	56.3212		2.35432	53.4253		10.3538	38.2751		3.35453	44.6275		11.3544	30.7149		4.35292	52.0505		12.3547	25.4094		5.35424	35.6		13.3539	43.9386		6.35307	35.7551		14.3535	37.3387		7.3534	28.4752		15.3539	41.5288		8.35446	38.5763		16.3537	44.025
1.3554	46.2409		9.35547	54.9225		2.35578	46.5362		10.3555	34.2788		3.35564	41.6899		11.3553	36.2233		4.35472	53.151		12.3557	31.046		5.3557	32.2926		13.3555	45.0838		6.3548	32.4029		14.3547	37.6667		7.35507	32.4328		15.3551	45.209		8.35577	30.5688		16.3551	34.3832
1.35714	52.9541		9.35728	57.1234		2.35758	47.1654		10.3566	37.1478		3.35745	37.0345		11.3567	29.5131		4.35625	54.0069		12.3569	30.9804		5.3575	35.2779		13.3573	29.3162		6.35647	36.2859		14.3566	38.1051		7.35674	34.5204		15.3569	42.0836		8.35661	41.6988		16.3569	34.1267
1.35846	61.6893		9.35839	53.2732		2.3589	43.181		10.3576	43.5091		3.35898	55.9603		11.3585	32.4984		4.35722	49.7899		12.3587	30.6792		5.35875	33.6525		13.3584	40.1928		6.3573	34.8186		14.3581	31.5947		7.35771	36.6915		15.3584	42.6323		8.358	48.9757		16.3582	27.5119
1.35943	56.5568		9.35922	63.3147		2.3598	45.7787		10.3592	46.0381		3.35988	53.3448		11.3598	30.7656		4.35834	45.8323		12.3602	35.8147		5.35959	34.3504		13.3592	46.0709		6.35827	35.603		14.3589	38.2483		7.35861	35.7759		15.3593	39.5814		8.35987	43.6463		16.359	25.5734
1.36068	56.3241		9.36061	62.8823		2.36119	51.797		10.361	41.6183		3.36092	41.9672		11.3606	41.4215		4.36014	49.426		12.361	38.2632		5.36084	34.756		13.3606	38.6956		6.35987	37.6518		14.3599	37.792		7.36014	32.567		15.3603	35.9698		8.36119	28.8391		16.3602	31.4665
1.36235	43.3302		9.36228	59.8164		2.363	50.2044		10.362	46.1962		3.36252	40.7594		11.3618	36.778		4.36174	50.5563		12.3621	34.5472		5.3625	37.4252		13.3623	37.2164		6.36147	41.5169		14.3616	28.9464		7.36174	32.8413		15.362	35.1497		8.36196	33.3692		16.3619	36.5185
1.36395	40.5357		9.36353	55.5428		2.36432	46.0232		10.3629	44.3054		3.36405	45.719		11.3635	35.8207		4.36264	50.7323		12.3638	30.5778		5.36389	30.4853		13.3635	26.7097		6.36258	38.4392		14.3631	18.8393		7.36292	36.9689		15.3635	32.6385		8.36321	37.8874		16.3634	29.194
1.36499	60.4964		9.3645	49.6199		2.36508	52.0654		10.3643	41.9493		3.36516	50.3923		11.3649	37.3417		4.36361	44.869		12.3653	37.7592		5.36486	30.9416		13.3646	32.1166		6.36355	34.419		14.3642	25.0992		7.36389	36.8436		15.3645	40.1003		8.36494	41.9464		16.3643	29.8352
1.3661	56.014		9.36582	49.4081		2.36633	45.3253		10.366	36.6319		3.3662	54.6988		11.3659	41.3231		4.36521	44.1384		12.3664	35.1616		5.36604	31.7379		13.3658	30.9267		6.36508	27.0318		14.3652	33.2022		7.36535	44.6752		15.3656	40.5089		8.36633	38.3139		16.3655	35.6298
1.36777	52.301		9.36763	51.5733		2.36807	39.2414		10.3672	33.1604		3.36773	43.6075		11.3671	38.1976		4.36681	36.5096		12.3675	34.8991		5.36778	32.7757		13.3676	36.4052		6.36682	27.2733		14.3668	30.1244		7.36715	45.039		15.3672	41.3469		8.3673	36.3694		16.3672	35.0035
1.36943	45.4655		9.36908	52.3577		2.36946	47.6187		10.3681	31.0042		3.36946	41.5557		11.3688	33.4467		4.36792	47.4488		12.3691	29.7606		5.36938	31.8124		13.3691	37.7711		6.36814	39.3786		14.3685	27.7774		7.36847	33.5452		15.3689	44.9645		8.36848	29.4862		16.3688	42.3878
1.37047	43.6731		9.36999	50.1388		2.37043	55.1103		10.3695	37.3953		3.37071	44.8452		11.3704	37.3297		4.36889	47.6337		12.3708	28.1293		5.37042	27.4195		13.3701	34.8037		6.36904	38.3735		14.3697	32.7966		7.36938	30.5807		15.37	38.4063		8.37015	30.2765		16.3699	34.9976
1.37152	55.0209		9.37117	45.4059		2.37168	58.2746		10.3713	48.3971		3.37162	49.9509		11.3715	36.2412		4.37042	46.1335		12.3719	29.0687		5.37146	35.9877		13.3712	37.7562		6.37043	33.062		14.3706	32.7698		7.3707	30.4197		15.371	45.0301		8.37175	39.9751		16.3709	28.2724
1.37318	44.5947		9.3729	61.8951		2.37341	48.4031		10.3727	41.5706		3.373	54.824		11.3725	35.6924		4.37222	43.5986		12.3728	29.3282		5.37313	32.2538		13.3729	32.9964		6.37223	39.1311		14.3721	31.6275		7.3725	28.8838		15.3725	48.5343		8.37279	47.6366		16.3725	36.2352
1.37492	45.3671		9.3745	55.4533		2.37501	48.3733		10.3736	35.0602		3.37481	46.7032		11.3742	34.2013		4.37341	43.9893		12.3744	37.5236		5.37479	31.0728		13.3746	32.4298		6.37355	38.5555		14.374	32.3522		7.37389	40.7206		15.3743	42.012		8.3739	47.7977		16.3743	39.9393
1.37589	54.4483		9.37547	43.3481		2.37598	45.7757		10.3749	44.6841		3.37613	40.5089		11.3759	35.5403		4.37431	48.6327		12.3762	33.5839		5.37591	31.4247		13.3755	32.0421		6.37446	31.6544		14.3751	40.6103		7.37486	39.0207		15.3756	43.7358		8.37557	38.4541		16.3754	36.8526
1.37679	59.9268		9.37665	43.9445		2.37709	38.2244		10.3766	32.6773		3.37703	40.819		11.3769	37.5892		4.37577	37.449		12.3774	32.4268		5.37688	38.2781		13.3766	33.6317		6.37584	30.0737		14.376	40.5566		7.37611	33.8464		15.3765	48.3166		8.37723	38.6867		16.3763	33.1247
1.37832	54.2484		9.37839	51.5912		2.37876	37.1955		10.3781	35.5582		3.37842	50.3327		11.378	41.4364		4.37757	38.5107		12.3783	38.0574		5.37854	41.4543		13.3783	34.577		6.37765	32.3045		14.3776	35.7133		7.37785	31.1802		15.378	45.0301		8.37827	44.6901		16.3779	29.8023
1.37992	53.98		9.37999	48.3166		2.38043	43.3361		10.3791	29.2834		3.3803	38.5883		11.3797	33.566		4.37889	39.486		12.3798	33.4289		5.38028	40.3091		13.38	38.0992		6.37897	33.7957		14.3794	32.6863		7.37931	39.2682		15.3798	42.7367		8.37925	46.9268		16.3797	38.8149
1.3811	47.1774		9.38089	45.0927		2.38147	43.3003		10.3803	29.695		3.38162	40.1957		11.3813	33.0054		4.37979	54.5974		12.3817	25.979		5.38132	40.2584		13.3809	30.3213		6.3798	37.4908		14.3806	33.8613		7.38021	35.4956		15.381	34.2341		8.38091	35.943		16.3807	41.8688
1.38207	50.7174		9.38186	49.2203		2.38244	40.16		10.382	31.7409		3.38238	45.5669		11.3823	34.6099		4.38118	52.471		12.3828	28.8957		5.38216	37.0166		13.3819	31.7916		6.38098	34.1088		14.3814	26.7485		7.38132	33.906		15.3818	34.762		8.38265	43.5031		16.3815	35.764
1.38353	54.4423		9.38346	48.0631		2.38411	41.8837		10.3836	40.3747		3.38363	43.6433		11.3832	40.6729		4.38306	52.5754		12.3836	28.842		5.38361	38.9998		13.3835	37.9948		6.38265	35.1318		14.3827	27.3747		7.38299	31.9198		15.3831	37.3596		8.38369	46.9597		16.383	34.7649
1.38527	59.4615		9.38506	51.4838		2.38584	46.6107		10.3845	41.2515		3.3853	41.9881		11.3847	40.8638		4.38438	48.7908		12.385	26.8856		5.38528	32.7757		13.3851	34.2639		6.38411	36.9033		14.3844	33.3841		7.38452	36.0772		15.3848	43.3361		8.38459	35.9221		16.3847	39.0147
1.38665	56.0945		9.38617	43.5538		2.38689	44.8362		10.3855	32.0212		3.38675	47.2579		11.3864	30.2974		4.38514	51.63		12.3867	29.3162		5.38646	40.8578		13.3862	34.9647		6.38508	36.5931		14.3858	29.4146		7.38549	39.9959		15.3861	50.7681		8.38605	30.8462		16.3859	42.7039
1.38763	50.8933		9.38714	40.8101		2.38772	34.3116		10.3871	30.0558		3.38773	32.0391		11.3876	33.6257		4.38639	48.6775		12.3879	25.4839		5.38743	39.1191		13.3871	36.3605		6.38626	39.644		14.3867	34.5562		7.3866	37.0762		15.3871	47.747		8.38772	38.6927		16.3869	41.1978
1.38888	58.5191		9.38867	41.3588		2.38918	35.9042		10.3887	31.6037		3.38891	41.8241		11.3885	28.0786		4.38806	49.3038		12.3889	27.8102		5.38882	39.7216		13.3887	37.0017		6.38793	37.9769		14.388	37.0762		7.3882	44.1593		15.3883	44.9466		8.3889	45.2836		16.3882	35.4688
1.39068	57.7467		9.3904	57.3113		2.39091	42.1611		10.3898	38.3228		3.39057	44.5529		11.3899	34.7948		4.38952	49.8436		12.3902	31.4486		5.39063	37.628		13.3905	28.5378		6.38952	36.3963		14.3897	31.8363		7.38993	40.4761		15.39	42.0806		8.38987	41.9344		16.3899	39.0714
1.39214	43.8312		9.39165	54.8211		2.39209	35.9817		10.3908	36.5335		3.39224	47.401		11.3917	33.9597		4.39049	47.2549		12.3919	29.358		5.39202	35.3733		13.3917	23.0086		6.39064	33.736		14.3912	33.396		7.39104	26.8021		15.3916	42.7725		8.39126	48.2122		16.3914	38.7672
1.39304	50.3684		9.39256	50.0285		2.393	39.1102		10.3923	29.0389		3.39328	48.7073		11.3931	35.26		4.39167	47.1326		12.3935	40.5506		5.39292	42.856		13.3926	28.1829		6.39161	34.1446		14.3922	30.4913		7.39195	32.564		15.3926	39.5068		8.393	54.2007		16.3924	39.6947
1.39429	51.0782		9.39394	44.1384		2.39446	52.3755		10.3941	40.324		3.39425	47.6844		11.394	39.9363		4.39334	50.5325		12.3944	36.7482		5.39417	35.8237		13.394	27.4225		6.39321	37.8427		14.3933	31.4844		7.39347	36.6826		15.3936	37.1508		8.39439	40.2524		16.3936	40.0287
1.3961	43.2049		9.39575	47.0611		2.39626	52.9571		10.3953	42.2834		3.39592	45.8502		11.3953	37.1418		4.39493	50.7979		12.3955	32.8055		5.39591	34.7381		13.3958	26.5785		6.39494	37.2194		14.3951	31.4009		7.39528	40.7296		15.3954	35.1765		8.39536	46.8105		16.3954	30.8074
1.39756	54.496		9.39714	52.6469		2.39765	51.1319		10.3962	38.472		3.39766	43.2139		11.3971	35.4867		4.39597	54.0576		12.3973	29.6473		5.39743	29.9395		13.3971	37.5474		6.39612	30.7507		14.3967	35.2361		7.39646	35.3912		15.397	40.5775		8.39661	51.1707		16.3969	28.6213
1.39839	57.9376		9.39797	45.4208		2.39855	47.8245		10.3977	37.5027		3.39877	47.5979		11.3985	35.7998		4.39702	48.8922		12.3989	28.3738		5.39841	30.2706		13.398	39.1102		6.39702	34.4369		14.3977	33.071		7.39736	33.3513		15.3981	40.1957		8.39834	42.3192		16.3979	35.3256
1.3995	59.5391		9.39936	43.8938		2.3998	38.2632		10.3995	34.9379		3.39974	41.2157		11.3994	31.2279		4.39861	56.4464		12.3999	33.8106		5.39959	33.5303		13.3994	37.7801		6.39862	38.8507		14.3987	34.8186		7.39889	35.1288		15.3991	35.084		8.3998	42.4116		16.399	30.3869
1.40117	51.5614		9.40117	48.6417		2.40161	34.6069		10.4008	35.5612		3.40141	49.9986		11.4007	34.3146		4.40035	56.7536		12.401	42.0179		5.40139	35.6447		13.4013	37.2701		6.40036	31.3233		14.4005	39.5396		7.4007	38.1707		15.4008	39.7693		8.40077	48.5671		16.4007	30.697
1.40263	42.2207		9.40256	45.9457		2.40307	42.4623		10.4017	27.4672		3.40314	52.7334		11.4025	36.784		4.40146	44.9048		12.4027	28.517		5.40292	33.4289		13.4027	36.2114		6.40147	38.9014		14.4021	33.5362		7.40188	43.6851		15.4025	43.1274		8.40196	50.4877		16.4023	32.3582
1.40367	47.1356		9.40332	39.7812		2.40397	48.1198		10.4031	36.0086		3.40418	57.0936		11.404	36.605		4.40243	47.0968		12.4044	31.9556		5.40375	30.026		13.4035	33.4497		6.4023	35.2033		14.4031	35.1318		7.40264	40.6759		15.4035	39.2742		8.40376	53.5983		16.4032	35.4419
1.40478	52.7394		9.4045	43.5986		2.40522	48.1854		10.4049	38.9909		3.40502	53.5774		11.4049	39.6381		4.40403	40.5954		12.4053	45.5818		5.40479	38.129		13.4047	41.678		6.40376	31.213		14.404	38.7821		7.40403	36.101		15.4043	40.2703		8.40529	49.8376		16.4042	32.7489
1.40638	48.1496		9.40624	53.5894		2.40703	49.9271		10.4062	36.6945		3.40648	54.0278		11.4059	33.6287		4.40584	50.2939		12.4062	37.0345		5.40646	45.555		13.4064	35.7789		6.40543	32.4447		14.4056	30.6225		7.4057	38.132		15.4059	42.1074		8.40612	36.4171		16.4058	26.1192
1.40811	54.8568		9.40763	53.9353		2.40848	35.5463		10.407	38.3407		3.40821	48.9369		11.4076	40.3449		4.40688	52.4233		12.4078	40.4552		5.40799	36.8883		13.4078	33.4915		6.40668	33.8643		14.4072	38.5256		7.40702	28.4543		15.4075	47.7947		8.40716	43.527		16.4074	36.775
1.40922	51.0633		9.4086	54.9254		2.40932	39.3965		10.4082	43.4674		3.40939	43.6135		11.4091	34.9498		4.40771	51.6747		12.4094	29.9187		5.40903	26.3876		13.4088	43.9058		6.40765	37.4282		14.4084	37.3685		7.40799	34.9618		15.4086	43.8789		8.40883	51.9968		16.4084	33.2439
1.4102	53.2643		9.40978	53.1003		2.41043	42.349		10.4099	41.2246		3.41037	39.7216		11.4101	35.8594		4.40917	46.5451		12.4105	25.5943		5.41007	28.854		13.41	44.5619		6.40897	31.1116		14.4094	38.5853		7.40924	36.4857		15.4097	32.2061		8.41036	43.524		16.4095	30.5897
1.41172	48.7848		9.41144	51.3168		2.41209	42.689		10.4113	32.3284		3.41175	44.1324		11.4112	39.9452		4.41091	46.3334		12.4115	28.3529		5.41167	38.0008		13.4116	37.7234		6.41071	41.0069		14.4108	34.422		7.41097	34.252		15.4111	34.2072		8.4114	35.928		16.411	33.572
1.41353	49.423		9.41304	35.6179		2.41362	34.9379		10.4123	30.5032		3.41356	36.098		11.4128	30.4614		4.41209	43.8819		12.413	29.4922		5.41341	40.5775		13.4133	31.1116		6.41223	33.6108		14.4126	32.1465		7.4125	38.5256		15.4129	41.9523		8.41244	37.9411		16.4127	38.0664
1.41471	50.4818		9.41408	52.1608		2.41466	33.4736		10.4135	32.728		3.41502	41.0815		11.4145	42.346		4.41306	48.4448		12.4148	30.3869		5.41459	34.3086		13.4144	26.9513		6.41314	31.1295		14.4139	38.2244		7.41347	31.5053		15.4142	49.608		8.41404	39.3607		16.414	35.3972
1.41568	52.0087		9.41512	53.7176		2.41578	37.7323		10.4152	35.5552		3.41592	40.7147		11.4157	30.6672		4.41445	46.7539		12.4161	29.8143		5.41556	39.6023		13.4154	34.6039		6.41432	33.7122		14.4148	43.1333		7.41458	37.9202		15.4152	41.3618		8.41571	43.1005		16.4149	37.3208
1.41714	52.0535		9.41679	41.5795		2.41737	47.5233		10.4168	31.3442		3.41717	41.4364		11.4167	27.0795		4.41618	42.2953		12.417	34.9469		5.41702	32.6057		13.4171	39.1281		6.41612	31.7916		14.4161	32.2687		7.41632	38.3437		15.4164	35.9996		8.41696	44.2696		16.4163	34.8753
1.41895	61.6178		9.41853	38.97		2.41904	44.7706		10.4178	39.4114		3.41891	43.3391		11.4181	29.7278		4.41757	49.1964		12.4184	34.917		5.41882	31.4903		13.4188	35.7342		6.41765	33.2082		14.4179	31.7349		7.41792	30.4048		15.4182	39.2175		8.41786	42.8202		16.4181	41.5378
1.42013	54.3588		9.41964	42.6562		2.42022	44.1593		10.4189	48.5791		3.42043	44.7617		11.4199	32.7608		4.41854	43.1721		12.4202	34.1029		5.42007	28.0159		13.4198	44.6126		6.41862	32.2449		14.4194	36.7333		7.41896	25.8031		15.4197	36.6348		8.41932	43.9743		16.4195	34.3086
1.42089	54.4035		9.42061	39.6649		2.42119	38.8597		10.4206	35.8982		3.42134	42.3699		11.4212	42.0716		4.41979	43.2705		12.4216	35.4568		5.42097	38.5555		13.4208	34.7858		6.41973	34.9498		14.4203	35.6238		7.42	34.92		15.4207	42.346		8.42112	44.3501		16.4204	32.6356
1.42228	56.7655		9.42221	53.1211		2.42265	42.4176		10.4222	41.5766		3.42259	44.1294		11.4221	43.4972		4.42153	45.9844		12.4225	37.1717		5.42243	43.4286		13.4224	34.5592		6.42154	32.0093		14.4215	29.701		7.42174	30.8491		15.4219	41.8658		8.42237	42.9365		16.4218	33.4139
1.42395	56.4464		9.42394	52.0654		2.42446	47.5263		10.4233	35.7372		3.42439	42.7844		11.4235	35.6626		4.42306	44.5529		12.4238	37.7323		5.42424	39.7514		13.4242	36.784		6.42307	38.4421		14.4234	34.5204		7.4234	26.3458		15.4237	37.0434		8.42327	44.9645		16.4236	35.4002
1.42527	56.4852		9.42499	52.5187		2.42571	41.8271		10.4243	28.3291		3.42592	47.5352		11.4254	40.4492		4.42403	48.0363		12.4257	31.4963		5.42549	35.5374		13.4253	37.8278		6.42397	37.619		14.4249	37.6876		7.42431	29.7188		15.4252	40.8101		8.42473	39.0237		16.4249	37.9351
1.42624	53.6192		9.42582	47.6486		2.42661	42.9365		10.426	34.0432		3.42675	41.8867		11.4266	40.4403		4.42521	45.4745		12.427	40.7206		5.42632	42.0388		13.4261	27.5388		6.42494	36.1875		14.4256	46.4139		7.42521	34.2878		15.426	43.4674		8.42654	43.8491		16.4257	33.1575
1.42749	57.0071		9.42728	57.1562		2.42807	47.6724		10.4277	37.8188		3.4278	37.2104		11.4274	31.6126		4.42702	41.4155		12.4278	40.7206		5.42757	40.1868		13.4275	31.3412		6.42661	35.6835		14.4267	40.6312		7.42681	35.2272		15.427	38.7553		8.42779	45.4387		16.427	34.1476
1.42922	49.1517		9.42901	51.7433		2.42987	48.1496		10.4287	39.9094		3.42939	45.5937		11.4287	32.6892		4.42854	46.2558		12.4289	41.5885		5.42931	34.7202		13.4292	35.4777		6.42814	35.6238		14.4285	38.6509		7.4284	35.0125		15.4287	38.6569		8.42862	42.2297		16.4286	38.0992
1.43075	63.9619		9.43019	41.1769		2.43112	42.8083		10.4296	40.2882		3.43099	51.2512		11.4304	30.0737		4.42938	44.3412		12.4307	33.3125		5.43063	35.1825		13.4305	32.6356		6.42925	28.3172		14.43	39.5247		7.42958	35.26		15.4302	38.6121		8.42987	43.4733		16.43	33.5303
1.43172	49.8585		9.43117	43.5151		2.43189	44.0578		10.4311	31.9258		3.43203	37.112		11.4317	32.9845		4.43042	49.5662		12.4321	29.5697		5.4316	38.9014		13.4314	35.9877		6.43022	32.1733		14.431	39.4024		7.43056	42.847		15.4313	37.0554		8.43154	49.9002		16.431	38.3646
1.4329	47.7679		9.43256	49.9807		2.43321	34.9498		10.4327	36.945		3.43307	41.5945		11.4326	34.4876		4.43209	45.5997		12.4332	37.1597		5.43285	36.5275		13.4328	34.5562		6.43175	40.0645		14.4321	29.8948		7.43202	35.9131		15.4323	32.9815		8.43293	43.7537		16.4322	33.8852
1.43464	47.3265		9.43429	45.051		2.43494	32.0808		10.4339	36.1875		3.43467	45.8532		11.4339	39.3667		4.43361	47.3652		12.4343	34.6695		5.43459	24.6608		13.4346	32.9994		6.43348	30.9028		14.4337	25.1887		7.43382	28.2187		15.4339	33.4497		8.4339	37.6727		16.4338	40.822
1.43624	54.8002		9.43568	46.5958		2.43626	37.8516		10.4349	34.8842		3.43641	49.5274		11.4356	40.1063		4.43472	40.6103		12.436	41.0815		5.43618	33.7808		13.436	37.2999		6.43473	26.7902		14.4354	34.3892		7.43507	31.374		15.4357	36.0772		8.43515	34.9528		16.4355	39.5665
1.43728	57.2695		9.43665	51.9073		2.43723	39.5367		10.4363	41.2008		3.43759	47.0611		11.4372	36.0324		4.43577	47.3414		12.4376	39.6291		5.43716	30.7209		13.4369	36.7034		6.43571	30.8879		14.4365	42.182		7.43604	32.1912		15.4368	39.0058		8.43689	39.8319		16.4365	35.3256
1.43832	45.6266		9.4379	52.8766		2.43848	41.2396		10.438	45.2031		3.43849	45.6892		11.4382	31.8691		4.43729	56.3778		12.4387	36.6348		5.4382	33.8613		13.4381	32.9278		6.43709	26.6083		14.4375	33.2082		7.43743	36.3814		15.4377	40.7982		8.43848	42.1641		16.4376	38.5823
1.44006	46.9388		9.43964	62.4349		2.44022	49.1427		10.4394	43.4644		3.43995	42.7218		11.4393	35.6835		4.43903	41.9344		12.4397	35.9131		5.43993	35.1437		13.4398	40.825		6.4389	36.0533		14.4391	30.5509		7.43917	45.1494		15.4393	47.4159		8.43946	38.4541		16.4392	43.3689
1.44172	53.6132		9.44117	52.3129		2.44175	39.4323		10.4404	32.397		3.44175	43.4584		11.441	30.029		4.44028	50.6011		12.4413	32.6296		5.4416	33.7897		13.4414	36.5245		6.44022	35.6775		14.4408	32.9219		7.44056	35.2779		15.4411	44.3412		8.44057	48.5224		16.4409	39.0476
1.44263	55.8082		9.44207	39.7305		2.44272	46.0918		10.4416	33.745		3.44307	43.8759		11.4426	33.5571		4.44118	54.0993		12.443	34.5711		5.44257	31.2667		13.4423	29.2864		6.44112	34.3057		14.442	37.7801		7.44146	39.1549		15.4423	40.1987		8.44223	44.9824		16.442	37.5146
1.44353	61.0153		9.44325	46.2976		2.44383	43.0409		10.4434	41.5318		3.44398	41.0278		11.4437	42.0478		4.44264	49.5125		12.4442	29.4296		5.44361	38.5584		13.4435	34.7053		6.44251	29.7904		14.443	32.1465		7.44278	30.5062		15.4432	39.7365		8.4439	51.3675		16.443	39.7454
1.44513	59.2707		9.44506	48.5671		2.44557	45.9665		10.4449	39.3607		3.44537	53.2404		11.4447	42.3907		4.44445	41.4513		12.4451	31.8691		5.44535	34.8693		13.4453	35.758		6.44439	31.9466		14.4445	40.4075		7.44459	33.3125		15.4448	37.115		8.44494	42.182		16.4446	39.1489
1.44672	58.6026		9.44665	54.3439		2.44723	45.9516		10.4458	33.5422		3.44717	50.3476		11.4464	46.8463		4.44577	43.7865		12.4467	34.0044		5.44702	32.4626		13.4469	37.8457		6.44571	36.951		14.4463	36.2561		7.44597	39.5426		15.4466	39.8021		8.44598	41.9016		16.4463	38.5674
1.4479	47.4965		9.44749	52.8408		2.44828	42.7486		10.447	35.096		3.44842	44.8154		11.4481	36.5812		4.44667	53.7683		12.4485	34.6277		5.44799	30.366		13.4478	32.8443		6.44647	37.9769		14.4475	34.8663		7.44681	37.2761		15.4477	41.2336		8.44765	39.5247		16.4474	29.6234
1.44888	55.9692		9.44853	38.2274		2.44932	42.3102		10.4488	31.4903		3.44925	49.9539		11.4491	34.7888		4.44813	53.5953		12.4496	37.291		5.44889	28.9852		13.4487	33.0859		6.44772	30.0588		14.4483	26.7306		7.44792	38.9193		15.4485	40.1778		8.44932	42.1671		16.4482	28.0517
1.45033	51.9878		9.45019	41.6123		2.45098	38.0813		10.4504	31.9168		3.4505	47.8961		11.45	29.4952		4.44993	54.4274		12.4504	38.9491		5.45042	32.5878		13.4504	28.5856		6.44939	31.5172		14.4496	32.7429		7.44958	38.4928		15.4498	33.9478		8.45029	41.2634		16.4497	35.7879
1.45207	57.1025		9.45172	44.6483		2.45265	38.9581		10.4512	37.0136		3.45224	50.8725		11.4515	23.7423		4.45125	45.388		12.4518	31.8542		5.45209	41.6392		13.452	29.2536		6.45084	31.3442		14.4514	34.1864		7.45111	41.1411		15.4516	39.7066		8.45119	40.4791		16.4513	38.964
1.45339	58.0002		9.45276	44.547		2.45362	40.2763		10.4522	35.2123		3.45363	48.245		11.4531	30.3183		4.45202	46.6495		12.4535	36.0026		5.4532	33.3811		13.453	28.3798		6.45175	30.9625		14.4527	35.1526		7.45209	39.7186		15.4529	42.2476		8.45272	41.9016		16.4526	35.1497
1.45429	55.4414		9.45381	49.4618		2.45459	48.0422		10.4539	32.6743		3.4546	42.7963		11.4543	29.2387		4.45327	42.6293		12.4548	38.9163		5.45424	29.1671		13.4541	37.0404		6.45293	40.2554		14.4537	32.2747		7.4532	32.6833		15.4539	34.756		8.45432	44.5022		16.4536	39.4472
1.45568	54.5586		9.4554	46.1723		2.45612	46.1753		10.4554	36.9778		3.45585	35.5582		11.4553	32.737		4.455	43.3451		12.4557	43.7		5.4557	32.8533		13.4556	32.1107		6.45466	38.0187		14.455	35.3793		7.45486	27.4284		15.4551	38.9163		8.4555	44.2278		16.455	45.0927
1.45749	49.5513		9.45707	45.9904		2.45772	45.6206		10.4565	34.0641		3.45759	41.9195		11.4567	28.517		4.45639	42.9663		12.457	39.7454		5.45743	34.2043		13.4574	35.0393		6.45626	38.7463		14.4567	42.847		7.45653	29.1492		15.4568	41.7794		8.45654	45.8622		16.4567	45.3731
1.45888	46.8761		9.45832	50.6249		2.4589	42.0448		10.4576	27.7952		3.45919	36.4112		11.4585	35.1974		4.45736	39.0804		12.4588	36.8734		5.45875	41.3976		13.4586	33.3573		6.4573	31.3293		14.4582	38.7225		7.45764	35.758		15.4584	40.9026		8.458	35.3674		16.4581	39.9601
1.45978	45.2746		9.45922	53.151		2.45987	40.0198		10.4591	30.4316		3.46016	42.7039		11.4599	42.5041		4.45861	44.3919		12.4603	36.9689		5.45965	40.491		13.4595	32.0779		6.45834	32.8712		14.4592	36.617		7.45861	38.627		15.4593	41.6302		8.45973	34.0939		16.459	42.5727
1.4611	53.4402		9.46068	51.9759		2.46133	40.6073		10.4609	34.1208		3.46127	38.6628		11.4608	44.8154		4.46028	47.7828		12.4612	38.4272		5.46097	32.8771		13.461	33.7062		6.45994	33.5511		14.4603	31.5112		7.46021	31.3293		15.4605	32.9278		8.46105	34.0164		16.4603	39.0326
1.4629	59.9506		9.46242	42.349		2.46307	33.396		10.462	29.5697		3.46293	40.1928		11.4621	39.0774		4.46188	51.8894		12.4624	43.2556		5.46278	33.8166		13.4628	30.0887		6.46168	32.4924		14.4621	33.8374		7.46195	30.4823		15.4623	35.0333		8.46196	43.3779		16.462	40.5566
1.46429	50.3327		9.46374	45.3224		2.46446	36.8168		10.463	31.046		3.4646	43.4495		11.4639	26.5099		4.46292	52.1578		12.4642	33.2141		5.46424	35.2719		13.4642	31.9556		6.46279	29.352		14.4637	35.8893		7.46313	35.1526		15.4639	36.5543		8.46327	42.513		16.4636	41.6899
1.46513	58.0271		9.46464	43.2705		2.46536	40.7982		10.4645	28.5647		3.46564	47.2549		11.4654	35.4986		4.46396	55.0149		12.4657	30.867		5.46514	33.4676		13.465	32.4447		6.46376	34.1923		14.4646	45.7727		7.46403	36.0324		15.4648	35.3405		8.46508	41.0189		16.4645	43.4167
1.46624	61.0332		9.46603	49.6974		2.46668	38.135		10.4663	31.3561		3.46668	41.7287		11.4662	32.8264		4.4657	52.8438		12.4667	31.5261		5.46639	39.0923		13.4664	37.0583		6.46543	37.2104		14.4657	42.6084		7.46563	41.5676		15.4659	36.5513		8.46647	55.1998		16.4657	41.8748
1.4679	56.8073		9.4679	47.073		2.46848	35.8833		10.4675	30.6016		3.46835	43.0409		11.4675	35.1079		4.46736	43.1542		12.4678	34.3236		5.46827	40.1957		13.4682	40.2077		6.46716	41.0845		14.4674	40.9115		7.46736	38.3795		15.4676	38.0008		8.46744	46.2827		16.4675	43.7447
1.46936	58.1583		9.46915	44.2428		2.46987	40.5357		10.4684	28.1829		3.47009	39.7365		11.4694	33.8702		4.46841	36.4768		12.4696	31.723		5.46972	38.4093		13.4696	35.087		6.46821	40.8787		14.4691	39.2623		7.46847	45.218		15.4693	42.4742		8.46869	43.5747		16.469	37.4967
1.4704	53.643		9.46992	44.547		2.47084	38.1499		10.4699	38.0395		3.47106	41.7376		11.4708	28.9882		4.46938	45.1255		12.4712	31.0997		5.47049	36.6229		13.4703	33.4796		6.46904	34.5472		14.47	34.0104		7.46931	40.5864		15.4702	40.7087		8.4705	41.9076		16.4699	40.3896
1.47158	45.2418		9.47124	43.023		2.4721	41.0129		10.4717	26.2892		3.47196	39.5844		11.4715	32.4894		4.47104	45.6087		12.4721	35.7073		5.4716	34.5592		13.4716	41.1113		6.4705	35.4181		14.471	38.2543		7.4707	40.8697		15.4711	40.7445		8.47196	42.7218		16.4709	43.5002
1.47318	40.4313		9.47297	44.869		2.4739	37.0643		10.4729	26.4353		3.47349	35.8147		11.4726	43.0916		4.47278	42.2893		12.473	34.9826		5.47327	33.6764		13.4733	38.46		6.47216	39.6351		14.4726	34.9946		7.47243	36.5752		15.4727	43.1303		8.47279	35.5463		16.4726	41.0487
1.47485	38.6956		9.47429	40.7803		2.47536	33.0203		10.4738	29.7397		3.47509	33.9687		11.4744	39.9631		4.47382	50.95		12.4746	36.6199		5.47479	39.6887		13.4747	37.4699		6.47341	33.5183		14.4742	34.1148		7.47368	26.8081		15.4743	38.3378		8.4739	43.3481		16.4741	40.7564
1.47596	41.1769		9.47526	42.0269		2.47612	41.4752		10.475	33.1754		3.47627	43.8849		11.4758	32.6773		4.47466	47.1147		12.4762	36.8913		5.47584	37.3148		13.4757	31.1176		6.47439	33.059		14.4753	32.2836		7.47465	32.3493		15.4755	43.8431		8.47557	45.9486		16.4752	35.5403
1.47693	53.1569		9.47651	45.6385		2.47723	43.5538		10.4767	35.7193		3.47731	43.2288		11.4769	23.611		4.47611	52.7633		12.4773	34.4011		5.47695	38.5972		13.4769	28.8599		6.47571	35.2898		14.4762	36.9182		7.47597	28.9315		15.4765	38.7911		8.47709	37.9501		16.4762	34.929
1.47853	61.3941		9.47818	38.8895		2.47897	39.5605		10.4781	39.9393		3.4787	51.1707		11.478	26.5039		4.47778	44.6066		12.4784	33.3245		5.47854	33.4139		13.4786	31.3293		6.47751	37.8785		14.4778	34.2788		7.47771	40.1719		15.478	36.7631		8.47807	43.5151		16.4777	47.4935
1.48027	57.8272		9.47978	44.4277		2.48043	45.0092		10.479	32.1643		3.4805	46.2618		11.4796	31.2965		4.47896	45.6922		12.4799	43.3809		5.48021	39.2712		13.4802	32.4119		6.4789	37.109		14.4795	34.6844		7.47917	39.4382		15.4798	37.2194		8.47918	47.1147		16.4795	43.0618
1.48145	51.2572		9.48082	51.6717		2.48147	48.5373		10.4802	40.0765		3.48189	48.752		11.4813	42.6442		4.47993	48.3017		12.4817	39.483		5.48132	43.9893		13.4812	38.302		6.47987	32.2538		14.4808	41.7495		7.48014	33.2111		15.481	40.5208		8.48077	43.0498		16.4806	41.5557
1.48235	57.2964		9.48193	50.6249		2.48258	34.6755		10.482	32.5461		3.4828	52.7692		11.4824	34.073		4.48139	51.1468		12.4829	41.3946		5.48229	34.9677		13.4823	41.0308		6.48105	26.5576		14.4817	36.5603		7.48132	33.566		15.4819	33.5869		8.48251	50.3118		16.4816	37.0762
1.48395	50.1656		9.4836	42.9037		2.48418	28.2635		10.4836	37.625		3.48405	41.6004		11.4834	25.0694		4.48313	50.3983		12.4839	38.0097		5.48382	36.4768		13.4839	38.2602		6.48286	24.5863		14.4831	30.0499		7.48306	28.4454		15.4833	36.2859		8.48362	46.6256		16.4831	40.661
1.48575	47.4517		9.48526	41.0964		2.48591	38.46		10.4845	43.2377		3.48585	40.6938		11.4849	33.0889		4.48452	41.2664		12.4853	39.0744		5.48563	37.5236		13.4857	34.6993		6.48439	31.1086		14.4849	34.0283		7.48465	31.1921		15.4851	41.5587		8.4846	33.8464		16.4849	35.8773
1.48686	43.2705		9.48631	43.7566		2.48703	45.9278		10.4856	33.9388		3.48731	39.3547		11.4867	33.4318		4.48542	44.8094		12.4871	33.912		5.48681	36.274		13.4867	32.0987		6.48529	35.9221		14.4862	37.2582		7.48563	38.4481		15.4865	41.1978		8.48612	43.7805		16.4862	37.461
1.4877	43.6582		9.48728	43.8014		2.488	43.691		10.4873	39.984		3.48821	37.1955		11.4879	28.0637		4.48667	49.092		12.4884	35.6328		5.48778	36.1517		13.4877	32.1912		6.48647	31.6395		14.4871	34.4876		7.48674	40.9443		15.4874	36.2621		8.48793	42.9693		16.4871	41.8867
1.48908	51.1588		9.48894	48.6029		2.48953	35.1735		10.489	44.7915		3.48946	44.2726		11.4888	36.0682		4.48847	48.9518		12.4893	31.7975		5.48931	31.9973		13.4894	37.7443		6.48827	30.026		14.4885	41.2634		7.48847	36.0772		15.4887	39.2146		8.48911	40.2047		16.4886	46.0888
1.49075	62.8226		9.49068	40.6908		2.49133	34.7351		10.49	38.8865		3.49127	32.9576		11.4904	40.2763		4.48993	47.4189		12.4907	38.7762		5.49104	41.162		13.4911	33.6853		6.48987	31.6633		14.4903	41.496		7.49007	34.8902		15.4905	35.5582		8.49001	43.3421		16.4904	44.2099
1.492	50.3416		9.49165	42.7516		2.49251	47.6217		10.4911	33.2529		3.49273	36.7094		11.4922	36.4649		4.49091	41.4334		12.4925	40.2464		5.49222	31.887		13.4921	38.6241		6.49071	32.063		14.4917	42.5428		7.49097	41.7227		15.4919	42.8262		8.49154	42.8291		16.4916	36.5931
1.49297	49.0145		9.49256	42.9097		2.49348	48.245		10.4927	39.0356		3.49356	49.3008		11.4933	37.3417		4.49216	42.5279		12.4939	35.6		5.49306	33.3304		13.493	40.3478		6.49168	29.8113		14.4925	33.6108		7.49195	37.7562		15.4927	34.9349		8.49335	45.7041		16.4924	34.756
1.49429	56.6015		9.49401	37.3297		2.49501	50.4669		10.4945	33.9299		3.49467	50.3267		11.4941	30.5867		4.49396	43.4345		12.4946	28.7645		5.49445	34.3146		13.4944	35.5851		6.49334	28.1173		14.4937	40.1272		7.49354	32.4268		15.4939	34.1297		8.49452	47.9677		16.4936	34.8962
1.49603	48.8713		9.49568	46.9597		2.49675	49.9122		10.4954	32.4119		3.49634	44.535		11.4955	37.1329		4.49542	44.2666		12.4958	32.2717		5.49611	37.1269		13.4961	37.5355		6.49487	32.6684		14.4953	44.5678		7.49514	29.7487		15.4956	35.093		8.49529	49.435		16.4954	37.4431
1.49749	42.3192		9.49686	41.9136		2.49793	41.8509		10.4963	38.8955		3.49787	50.446		11.4972	30.0558		4.49625	46.2528		12.4976	36.2412		5.49743	37.7264		13.4973	41.2992		6.49591	39.477		14.4968	40.4463		7.49618	35.3674		15.497	33.4825		8.49668	44.2845		16.4968	43.1512
1.49846	47.4756		9.49783	41.3887		2.49869	30.1036		10.4979	39.4472		3.49891	47.8722		11.4985	27.843		4.49736	43.181		12.4989	33.5004		5.4984	39.8587		13.4982	33.5839		6.49696	40.4999		14.4978	48.8296		7.49715	31.3144		15.498	39.2205		8.49834	41.3231		16.4977	38.9611
1.49964	44.8482		9.49929	42.3192		2.50008	40.819		10.4995	32.9308		3.49995	47.9229		11.4994	28.3738		4.49896	45.7339		12.4999	36.4052		5.49965	39.8259		13.4997	36.0414		6.49855	39.0446		14.499	42.4802		7.49868	28.4842		15.4991	31.6275		8.49966	48.4687		16.4989	37.5087
