# Supplementary material for: Binding and sequestration of poison frog alkaloids by a plasma globulin
Source: eLife journal article supplement (doi:10.7554/elife.85096), 2023-12-14
Supplement: fig5-data1 [file OsABG+PTX_R1 analysis_CapillaryShapeRawData.xlsx]

## Sheet: RawData
NanoTemper Technologies	NanoTemper Technologies
MO.Affinity Analysis v3.0.5	MO.Affinity Analysis v3.0.5
Origin of exported data	Origin of exported data
Project Title:	20230407_BSA+PTX
Comment:
Project File Path:	C:\Users\nanotemper\Desktop\Aurora_MST\20230407_BSA\BSA+PTX analysis.nta3
Analysis-Set Name:	OsABG+PTX
Exported from:	Capillary Shape (Raw Data Inspection)
Exported on:	2023-04-11 08:18:51
Sample Information	Sample Information		Sample Information	Sample Information		Sample Information	Sample Information		Sample Information	Sample Information		Sample Information	Sample Information		Sample Information	Sample Information		Sample Information	Sample Information		Sample Information	Sample Information		Sample Information	Sample Information		Sample Information	Sample Information		Sample Information	Sample Information		Sample Information	Sample Information		Sample Information	Sample Information		Sample Information	Sample Information		Sample Information	Sample Information		Sample Information	Sample Information
Merge-Set Name:	OsABG+PTX_R1 (#20)		Merge-Set Name:	OsABG+PTX_R1 (#20)		Merge-Set Name:	OsABG+PTX_R1 (#20)		Merge-Set Name:	OsABG+PTX_R1 (#20)		Merge-Set Name:	OsABG+PTX_R1 (#20)		Merge-Set Name:	OsABG+PTX_R1 (#20)		Merge-Set Name:	OsABG+PTX_R1 (#20)		Merge-Set Name:	OsABG+PTX_R1 (#20)		Merge-Set Name:	OsABG+PTX_R1 (#20)		Merge-Set Name:	OsABG+PTX_R1 (#20)		Merge-Set Name:	OsABG+PTX_R1 (#20)		Merge-Set Name:	OsABG+PTX_R1 (#20)		Merge-Set Name:	OsABG+PTX_R1 (#20)		Merge-Set Name:	OsABG+PTX_R1 (#20)		Merge-Set Name:	OsABG+PTX_R1 (#20)		Merge-Set Name:	OsABG+PTX_R1 (#20)
Run Name:	OsABG+PTX_R1 (#20)		Run Name:	OsABG+PTX_R1 (#20)		Run Name:	OsABG+PTX_R1 (#20)		Run Name:	OsABG+PTX_R1 (#20)		Run Name:	OsABG+PTX_R1 (#20)		Run Name:	OsABG+PTX_R1 (#20)		Run Name:	OsABG+PTX_R1 (#20)		Run Name:	OsABG+PTX_R1 (#20)		Run Name:	OsABG+PTX_R1 (#20)		Run Name:	OsABG+PTX_R1 (#20)		Run Name:	OsABG+PTX_R1 (#20)		Run Name:	OsABG+PTX_R1 (#20)		Run Name:	OsABG+PTX_R1 (#20)		Run Name:	OsABG+PTX_R1 (#20)		Run Name:	OsABG+PTX_R1 (#20)		Run Name:	OsABG+PTX_R1 (#20)
Date of Measurement:	2023-04-11 07:37:51		Date of Measurement:	2023-04-11 07:38:17		Date of Measurement:	2023-04-11 07:38:44		Date of Measurement:	2023-04-11 07:39:11		Date of Measurement:	2023-04-11 07:39:38		Date of Measurement:	2023-04-11 07:40:04		Date of Measurement:	2023-04-11 07:40:31		Date of Measurement:	2023-04-11 07:40:57		Date of Measurement:	2023-04-11 07:41:24		Date of Measurement:	2023-04-11 07:41:51		Date of Measurement:	2023-04-11 07:42:18		Date of Measurement:	2023-04-11 07:42:44		Date of Measurement:	2023-04-11 07:43:11		Date of Measurement:	2023-04-11 07:43:37		Date of Measurement:	2023-04-11 07:44:04		Date of Measurement:	2023-04-11 07:44:31
Capillary Type:	Monolith Premium Capillary		Capillary Type:	Monolith Premium Capillary		Capillary Type:	Monolith Premium Capillary		Capillary Type:	Monolith Premium Capillary		Capillary Type:	Monolith Premium Capillary		Capillary Type:	Monolith Premium Capillary		Capillary Type:	Monolith Premium Capillary		Capillary Type:	Monolith Premium Capillary		Capillary Type:	Monolith Premium Capillary		Capillary Type:	Monolith Premium Capillary		Capillary Type:	Monolith Premium Capillary		Capillary Type:	Monolith Premium Capillary		Capillary Type:	Monolith Premium Capillary		Capillary Type:	Monolith Premium Capillary		Capillary Type:	Monolith Premium Capillary		Capillary Type:	Monolith Premium Capillary
Capillary Position:	1		Capillary Position:	9		Capillary Position:	2		Capillary Position:	10		Capillary Position:	3		Capillary Position:	11		Capillary Position:	4		Capillary Position:	12		Capillary Position:	5		Capillary Position:	13		Capillary Position:	6		Capillary Position:	14		Capillary Position:	7		Capillary Position:	15		Capillary Position:	8		Capillary Position:	16
Ligand:	PTX		Ligand:	PTX		Ligand:	PTX		Ligand:	PTX		Ligand:	PTX		Ligand:	PTX		Ligand:	PTX		Ligand:	PTX		Ligand:	PTX		Ligand:	PTX		Ligand:	PTX		Ligand:	PTX		Ligand:	PTX		Ligand:	PTX		Ligand:	PTX		Ligand:	PTX
Ligand Concentration:	0.001		Ligand Concentration:	3.90625e-06		Ligand Concentration:	0.0005		Ligand Concentration:	1.95313e-06		Ligand Concentration:	0.00025		Ligand Concentration:	9.76563e-07		Ligand Concentration:	0.000125		Ligand Concentration:	4.88281e-07		Ligand Concentration:	6.25e-05		Ligand Concentration:	2.44141e-07		Ligand Concentration:	3.125e-05		Ligand Concentration:	1.2207e-07		Ligand Concentration:	1.5625e-05		Ligand Concentration:	6.10352e-08		Ligand Concentration:	7.8125e-06		Ligand Concentration:	3.05176e-08
Target:	OsABG		Target:	OsABG		Target:	OsABG		Target:	OsABG		Target:	OsABG		Target:	OsABG		Target:	OsABG		Target:	OsABG		Target:	OsABG		Target:	OsABG		Target:	OsABG		Target:	OsABG		Target:	OsABG		Target:	OsABG		Target:	OsABG		Target:	OsABG
TargetConcentration:	5e-09		TargetConcentration:	5e-09		TargetConcentration:	5e-09		TargetConcentration:	5e-09		TargetConcentration:	5e-09		TargetConcentration:	5e-09		TargetConcentration:	5e-09		TargetConcentration:	5e-09		TargetConcentration:	5e-09		TargetConcentration:	5e-09		TargetConcentration:	5e-09		TargetConcentration:	5e-09		TargetConcentration:	5e-09		TargetConcentration:	5e-09		TargetConcentration:	5e-09		TargetConcentration:	5e-09
Measurement Settings	Measurement Settings		Measurement Settings	Measurement Settings		Measurement Settings	Measurement Settings		Measurement Settings	Measurement Settings		Measurement Settings	Measurement Settings		Measurement Settings	Measurement Settings		Measurement Settings	Measurement Settings		Measurement Settings	Measurement Settings		Measurement Settings	Measurement Settings		Measurement Settings	Measurement Settings		Measurement Settings	Measurement Settings		Measurement Settings	Measurement Settings		Measurement Settings	Measurement Settings		Measurement Settings	Measurement Settings		Measurement Settings	Measurement Settings		Measurement Settings	Measurement Settings
MST-Power:	Medium		MST-Power:	Medium		MST-Power:	Medium		MST-Power:	Medium		MST-Power:	Medium		MST-Power:	Medium		MST-Power:	Medium		MST-Power:	Medium		MST-Power:	Medium		MST-Power:	Medium		MST-Power:	Medium		MST-Power:	Medium		MST-Power:	Medium		MST-Power:	Medium		MST-Power:	Medium		MST-Power:	Medium
Excitation-Power:	15		Excitation-Power:	15		Excitation-Power:	15		Excitation-Power:	15		Excitation-Power:	15		Excitation-Power:	15		Excitation-Power:	15		Excitation-Power:	15		Excitation-Power:	15		Excitation-Power:	15		Excitation-Power:	15		Excitation-Power:	15		Excitation-Power:	15		Excitation-Power:	15		Excitation-Power:	15		Excitation-Power:	15
Excitation type:	Pico - RED		Excitation type:	Pico - RED		Excitation type:	Pico - RED		Excitation type:	Pico - RED		Excitation type:	Pico - RED		Excitation type:	Pico - RED		Excitation type:	Pico - RED		Excitation type:	Pico - RED		Excitation type:	Pico - RED		Excitation type:	Pico - RED		Excitation type:	Pico - RED		Excitation type:	Pico - RED		Excitation type:	Pico - RED		Excitation type:	Pico - RED		Excitation type:	Pico - RED		Excitation type:	Pico - RED
Thermostat Setpoint:	25		Thermostat Setpoint:	25		Thermostat Setpoint:	25		Thermostat Setpoint:	25		Thermostat Setpoint:	25		Thermostat Setpoint:	25		Thermostat Setpoint:	25		Thermostat Setpoint:	25		Thermostat Setpoint:	25		Thermostat Setpoint:	25		Thermostat Setpoint:	25		Thermostat Setpoint:	25		Thermostat Setpoint:	25		Thermostat Setpoint:	25		Thermostat Setpoint:	25		Thermostat Setpoint:	25
Included	Included		Included	Included		Included	Included		Included	Included		Included	Included		Included	Included		Included	Included		Included	Included		Included	Included		Included	Included		Included	Included		Included	Included		Included	Included		Included	Included		Included	Included		Included	Included
Position [mm]	Relative Fluorescence [-]		Position [mm]	Relative Fluorescence [-]		Position [mm]	Relative Fluorescence [-]		Position [mm]	Relative Fluorescence [-]		Position [mm]	Relative Fluorescence [-]		Position [mm]	Relative Fluorescence [-]		Position [mm]	Relative Fluorescence [-]		Position [mm]	Relative Fluorescence [-]		Position [mm]	Relative Fluorescence [-]		Position [mm]	Relative Fluorescence [-]		Position [mm]	Relative Fluorescence [-]		Position [mm]	Relative Fluorescence [-]		Position [mm]	Relative Fluorescence [-]		Position [mm]	Relative Fluorescence [-]		Position [mm]	Relative Fluorescence [-]		Position [mm]	Relative Fluorescence [-]
-2.24506	0.00382684		-2.24694	0.000856803		-2.24276	0.0019915		-2.24835	0.00112913		-2.24336	0.00107921		-2.2478	0.000907811		-2.24718	0.000871145		-2.24569	0.00108882		-2.24374	0.00163569		-2.24383	0.00130893		-2.24933	0.000896759		-2.24689	0.00150156		-2.24905	0.000780766		-2.24672	0.000604489		-2.2487	0.0004582		-2.24772	0.00126599
-2.23756	0.00368982		-2.24037	0.000975744		-2.23682	0.00210191		-2.24398	0.000748054		-2.23554	0.000907369		-2.23998	0.000855747		-2.24218	0.00075434		-2.23851	0.00135403		-2.23655	0.00147052		-2.23726	0.00106048		-2.2437	0.00148029		-2.23908	0.0013096		-2.24312	0.000738264		-2.2389	0.000270351		-2.24339	0.000519723		-2.24053	0.00110738
-2.23287	0.00295134		-2.236	0.000785223		-2.23245	0.00229137		-2.23742	0.000851524		-2.22992	0.00169062		-2.23311	0.00089817		-2.23749	0.000607953		-2.23101	0.00107805		-2.23218	0.00169833		-2.2332	0.00120021		-2.23964	0.00112823		-2.23408	0.0012855		-2.23906	0.000804567		-2.23359	0.000357793		-2.23557	0.000857987		-2.23585	0.00147324
-2.22818	0.00308415		-2.23069	0.000453704		-2.22682	0.00181215		-2.2296	0.00098675		-2.22586	0.00209822		-2.22842	0.0012397		-2.23061	0.000613173		-2.22601	0.00057759		-2.22718	0.00155632		-2.22789	0.00141044		-2.23308	0.00134244		-2.23002	0.00128891		-2.23312	0.00116456		-2.22921	0.000491702		-2.22838	0.000379131		-2.23147	0.000771001
-2.22068	0.00309203		-2.22288	0.001035		-2.21901	0.00127125		-2.22335	0.00161093		-2.21929	0.00119523		-2.22373	0.000845248		-2.2228	0.000848524		-2.22132	0.000283517		-2.21968	0.00137977		-2.21977	0.001114		-2.22526	0.00103396		-2.22283	0.00129104		-2.22499	0.000839419		-2.22265	0.00122059		-2.2237	0.000196562		-2.22397	0.000507212
-2.21287	0.00334351		-2.216	0.00132067		-2.21182	0.00132484		-2.21929	0.0011571		-2.21085	0.00101835		-2.21592	0.000837106		-2.21718	0.000650586		-2.21444	0.000827713		-2.21186	0.00131306		-2.21258	0.000895698		-2.21932	0.00182005		-2.21471	0.00109418		-2.21843	0.000428848		-2.21453	0.000991007		-2.21901	0.000992805		-2.21616	0.0010312
-2.20849	0.00310157		-2.21162	0.00118357		-2.20745	0.00179436		-2.21367	0.00138023		-2.20492	0.000426868		-2.20842	0.00111157		-2.21311	0.00114369		-2.20663	0.00120451		-2.20749	0.00108567		-2.2082	0.000950272		-2.21526	0.000848437		-2.2094	0.00176391		-2.21437	0.000345331		-2.2089	0.000921307		-2.21151	0.000832224		-2.21116	0.0012533
-2.20474	0.00275765		-2.20663	0.00126812		-2.20276	0.00169608		-2.20585	0.00122482		-2.20117	0.000755886		-2.20374	0.000889171		-2.20686	0.00149432		-2.20132	0.00120904		-2.2028	0.00158871		-2.2032	0.00121083		-2.20901	0.00077164		-2.20534	0.00124881		-2.20874	0.000913798		-2.20484	0.000431717		-2.20401	0.000804016		-2.20678	0.00125258
-2.19787	0.00295373		-2.1985	0.00101467		-2.19495	0.001303		-2.19898	0.00110662		-2.19492	0.000905837		-2.19936	0.00101173		-2.19874	0.00162179		-2.19694	0.000559493		-2.19499	0.00218958		-2.19539	0.00102714		-2.20089	0.000748557		-2.19846	0.00109183		-2.20031	0.00090976		-2.19796	0.000780428		-2.19932	0.000925729		-2.19959	0.00172121
-2.19037	0.0024693		-2.19163	0.00158839		-2.18745	0.00122252		-2.19492	0.000650683		-2.18648	0.00103784		-2.19186	0.000975302		-2.1928	0.00167921		-2.19007	0.000207036		-2.18718	0.00236677		-2.1882	0.00103882		-2.19464	0.000763011		-2.19034	0.00106538		-2.19406	0.000906573		-2.18984	0.000256411		-2.19464	0.00103278		-2.19147	0.00108391
-2.18506	0.00355757		-2.18756	0.00130899		-2.18276	0.0021197		-2.1896	0.000735436		-2.18086	0.00109519		-2.18405	0.000335314		-2.18874	0.000975117		-2.18194	0.000760927		-2.1828	0.00167281		-2.18414	0.000977029		-2.19089	0.00181854		-2.18533	0.000874276		-2.1903	0.00109656		-2.18422	0.000499728		-2.18714	0.00152163		-2.18678	0.000897025
-2.18068	0.00361572		-2.18319	0.00167576		-2.17807	0.00145647		-2.18148	0.000887276		-2.17742	0.000990554		-2.17967	0.00122641		-2.18249	0.00105995		-2.17663	0.000686171		-2.17905	0.00165307		-2.17976	0.00132444		-2.18558	0.00188628		-2.18159	0.00120552		-2.18531	0.00117604		-2.18078	0.00073713		-2.17964	0.000839775		-2.18304	0.00108726
-2.17412	0.00325143		-2.176	0.00122076		-2.17057	0.0011196		-2.1746	0.000804206		-2.17179	0.00107921		-2.17561	0.00150602		-2.17405	0.00127572		-2.1732	0.0014053		-2.17218	0.00197849		-2.17258	0.00123355		-2.17808	0.000927607		-2.17533	0.0017477		-2.17781	0.000874271		-2.17484	0.00031027		-2.17495	0.000920843		-2.17647	0.000926255
-2.16631	0.00321365		-2.16912	0.0020248		-2.16276	0.00125103		-2.17054	0.00114826		-2.16398	0.00118866		-2.16874	0.00133654		-2.16843	0.00139231		-2.16694	0.00117155		-2.16468	0.00193495		-2.16539	0.00110444		-2.17151	0.00149453		-2.16783	0.00168009		-2.17124	0.000574418		-2.16703	0.000546194		-2.1712	0.000624778		-2.16897	0.000430304
-2.16037	0.00439914		-2.16413	0.00186455		-2.15839	0.00165018		-2.16616	0.00157056		-2.15773	0.00100325		-2.16155	0.000608707		-2.16499	0.00112542		-2.15913	0.00124092		-2.15936	0.00169597		-2.16039	0.000574198		-2.16714	0.00135085		-2.1619	0.00105131		-2.16656	0.000539353		-2.16109	0.00017425		-2.16432	0.000533494		-2.16335	0.00074177
-2.15631	0.00340863		-2.15944	0.00119351		-2.15432	0.00126216		-2.15866	0.00134595		-2.15336	0.00080317		-2.15624	0.0010835		-2.15936	0.000643843		-2.15351	0.00127367		-2.15499	0.00138106		-2.15601	0.000426189		-2.16183	0.000938825		-2.15752	0.00123068		-2.16156	0.000565917		-2.15672	0.000161155		-2.15714	0.000762927		-2.15898	0.00162178
-2.15037	0.0040343		-2.15256	0.00138641		-2.14745	0.00139076		-2.15179	0.00160399		-2.14804	0.00103849		-2.15186	0.000978945		-2.15155	0.000534651		-2.14913	0.00145227		-2.14843	0.00151127		-2.14914	0.000864695		-2.15433	0.00122272		-2.15189	0.00137935		-2.15406	0.00103875		-2.15109	0.000263804		-2.15182	0.000762483		-2.15303	0.00142915
-2.14224	0.00373495		-2.14475	0.00148286		-2.14026	0.0014591		-2.14679	0.00187676		-2.14054	0.000842354		-2.1453	0.00125984		-2.1453	0.00078414		-2.14319	0.00115087		-2.1403	0.00121653		-2.14102	0.000787186		-2.14683	0.00149755		-2.14408	0.00125095		-2.14656	0.000772903		-2.14296	0.00042517		-2.14745	0.000523499		-2.14491	0.000592746
-2.13568	0.00369624		-2.13912	0.000712561		-2.13495	0.00227742		-2.1421	0.00195394		-2.13335	0.00113044		-2.13749	0.00131769		-2.14093	0.000612956		-2.13538	0.000810263		-2.13405	0.00097305		-2.13539	0.00117961		-2.14214	0.00119446		-2.13721	0.00158602		-2.14156	0.00076929		-2.13578	8.65963e-06		-2.14089	0.00106943		-2.13866	0.000748
-2.13193	0.00354913		-2.13506	0.00041348		-2.13057	0.0018811		-2.13523	0.00128601		-2.12867	0.000994494		-2.13155	0.000814609		-2.1353	0.00108409		-2.12882	0.00081371		-2.12999	0.00125385		-2.13133	0.000689717		-2.13776	0.00124213		-2.13283	0.00142264		-2.13718	0.00120728		-2.13141	0.000311538		-2.13307	0.000615006		-2.13429	0.00132158
-2.12599	0.00321218		-2.1285	0.000752568		-2.12401	0.00167465		-2.12741	0.00107045		-2.12367	0.000751945		-2.12748	0.000607636		-2.1278	0.000587724		-2.12476	0.000597841		-2.12436	0.00128839		-2.12508	0.000773596		-2.13026	0.00185176		-2.12752	0.000961938		-2.12999	0.000491538		-2.12671	0.000788666		-2.12682	0.000595461		-2.12897	0.00124108
-2.11787	0.0029873		-2.12038	0.00105035		-2.1162	0.00252391		-2.1221	0.00196824		-2.11617	0.00137605		-2.12155	0.000867745		-2.12061	0.00111955		-2.11944	0.000485813		-2.11624	0.0014289		-2.11664	0.00112844		-2.12245	0.00129606		-2.11971	0.00111295		-2.12218	0.000384645		-2.1189	0.000866392		-2.12245	0.000466418		-2.12084	0.000209881
-2.11131	0.00382959		-2.11444	0.00125255		-2.10995	0.00155232		-2.11804	0.000960672		-2.10867	0.00114751		-2.11342	0.00117521		-2.11593	0.00128834		-2.11132	0.00104121		-2.10968	0.00139157		-2.1107	0.000812456		-2.11745	0.00119769		-2.11253	0.00134607		-2.11687	0.00113077		-2.1114	0.000654757		-2.11682	0.000811346		-2.11397	0.000343332
-2.10756	0.00402146		-2.11069	0.000956065		-2.10589	0.000963905		-2.11148	0.00096572		-2.10398	0.00104966		-2.10686	0.0008821		-2.11124	0.000981425		-2.10413	0.000910226		-2.10561	0.00121395		-2.10695	0.00071796		-2.11308	0.00103482		-2.10783	0.0015969		-2.1128	0.000259901		-2.10672	0.000982981		-2.10901	0.00108409		-2.1096	4.48033e-05
-2.10256	0.00309882		-2.10412	0.000664769		-2.10026	0.00124456		-2.10335	0.0011878		-2.09929	0.00123858		-2.1028	0.000606136		-2.10374	0.00113129		-2.09975	0.00112782		-2.09999	0.00133816		-2.1007	0.000463988		-2.10589	0.000612005		-2.10315	0.00149154		-2.10562	2.18886e-05		-2.10203	0.000956368		-2.10214	0.00106743		-2.1046	0.000567589
-2.09506	0.00340771		-2.096	0.000561831		-2.09214	0.00152765		-2.09772	0.000923448		-2.09179	0.00135613		-2.09717	0.000420803		-2.09624	0.00134206		-2.09476	0.000782687		-2.09155	0.00113523		-2.09226	0.000539373		-2.09807	0.000946591		-2.09565	0.00114153		-2.09749	0.000877246		-2.09453	0.00086787		-2.09807	0.00148654		-2.09648	0.00130433
-2.08818	0.00376301		-2.09006	0.00161478		-2.08557	0.00161379		-2.09366	0.000884332		-2.08429	0.00143099		-2.08873	0.00103765		-2.09124	0.000819812		-2.08694	0.000438632		-2.08499	0.00169168		-2.08633	0.0011278		-2.09308	0.00118389		-2.08815	0.000850174		-2.09249	0.000972663		-2.08703	0.00130719		-2.09245	0.00130819		-2.08929	0.000626049
-2.08349	0.00325657		-2.08662	0.00139852		-2.08151	0.00164533		-2.08679	0.000512723		-2.07961	0.00103237		-2.08217	0.000956662		-2.08686	0.000999044		-2.07945	0.0010703		-2.08155	0.00216941		-2.08289	0.000940717		-2.08933	0.000664857		-2.08377	0.00080645		-2.08874	0.000357869		-2.08265	0.000872094		-2.08432	0.00101346		-2.08553	0.000326082
-2.07881	0.00363002		-2.081	0.00162127		-2.07589	0.00198625		-2.07866	0.000903049		-2.07554	0.00120465		-2.07874	0.000653916		-2.07936	0.00140253		-2.07538	0.00105608		-2.07655	0.00211686		-2.07758	0.000770411		-2.08276	0.000689665		-2.07971	0.000775309		-2.08249	0.000748252		-2.07859	0.000776415		-2.07745	0.000724503		-2.08085	0.0005374
-2.07131	0.00389783		-2.0735	0.00197744		-2.06745	0.00168233		-2.07304	0.0017552		-2.06898	0.00153104		-2.07373	0.00103315		-2.07155	0.00204725		-2.07132	0.000711592		-2.06905	0.00164535		-2.06976	0.000859598		-2.07526	0.00133273		-2.07252	0.00115689		-2.07499	0.000596306		-2.07171	0.000709672		-2.0737	0.000867982		-2.07335	0.000944224
-2.06381	0.00318797		-2.06694	0.00202739		-2.06089	0.00173915		-2.0696	0.00113964		-2.06148	0.00108184		-2.06624	0.000322458		-2.06686	0.00123396		-2.06413	0.000463192		-2.06218	0.00133709		-2.06352	0.00077487		-2.06964	0.00142895		-2.06534	0.000934637		-2.06906	0.000825818		-2.06453	0.000666163		-2.06901	0.000806682		-2.06647	0.000504576
-2.05881	0.00299078		-2.06256	0.00217185		-2.05714	0.00206814		-2.06398	0.00101346		-2.05617	0.00133052		-2.05936	0.000679841		-2.0628	0.000929657		-2.05694	0.000615291		-2.05749	0.00102432		-2.05914	0.00129704		-2.06526	0.00172384		-2.06033	0.000466465		-2.06468	0.00099519		-2.05922	0.000972209		-2.06151	0.000685413		-2.06147	0.000574297
-2.05443	0.00241115		-2.05725	0.00134597		-2.05245	0.00251602		-2.05616	0.00126561		-2.05179	0.000924225		-2.05467	0.00102758		-2.05624	0.00090225		-2.05194	0.00110046		-2.05249	0.00163591		-2.05383	0.000930311		-2.05901	0.0013172		-2.05596	0.00120466		-2.05906	0.000730188		-2.05453	0.000721289		-2.05464	0.00130486		-2.05679	0.000587475
-2.04756	0.00323419		-2.04975	0.00133062		-2.04464	0.0019365		-2.04992	0.00141514		-2.04554	0.00102886		-2.04967	0.000648773		-2.04874	4.91583e-05		-2.04757	0.000994032		-2.0453	0.00160116		-2.04633	0.000638116		-2.0512	0.000618045		-2.04909	0.00174727		-2.05124	0.000358719		-2.04797	0.000878008		-2.04995	0.00100191		-2.04991	0.00100053
-2.03974	0.00361278		-2.04225	0.00171707		-2.03807	0.00127429		-2.04554	0.000817034		-2.03742	0.000487287		-2.04248	0.000604422		-2.04343	0.00110628		-2.04069	0.000890621		-2.0378	0.00136647		-2.03883	0.000412811		-2.04464	0.00107969		-2.04096	0.00169288		-2.04437	0.000486863		-2.04016	0.000973899		-2.04526	0.00133396		-2.0421	0.00117758
-2.03443	0.00346035		-2.03756	0.00165262		-2.03339	0.00162612		-2.03991	0.00137644		-2.03117	0.000334928		-2.03499	0.000706837		-2.03905	0.00130596		-2.03288	0.00055066		-2.03249	0.00127874		-2.03414	0.00115137		-2.04026	0.00101648		-2.03533	0.00136335		-2.04031	0.00104194		-2.03421	0.000707349		-2.03807	0.000955047		-2.03647	0.00169294
-2.03006	0.00328023		-2.03287	0.00180616		-2.0287	0.00157517		-2.03241	0.00101872		-2.02711	0.00117947		-2.02998	0.000899241		-2.0328	0.00096794		-2.02694	0.00114936		-2.02843	0.00156898		-2.02945	0.000685046		-2.03495	0.000780484		-2.03127	0.0013337		-2.03499	0.00122003		-2.03016	0.000628144		-2.03057	0.000324272		-2.03241	0.000867795
-2.02318	0.00362305		-2.02569	0.00180011		-2.02151	0.00138368		-2.02523	0.000867297		-2.02148	0.000739905		-2.02561	0.000872459		-2.02499	0.000851569		-2.02288	0.000821897		-2.02155	0.00158142		-2.02195	0.00129195		-2.02714	0.00106912		-2.02502	0.00115262		-2.02718	0.000270952		-2.02422	0.000701646		-2.02526	0.00020589		-2.02585	0.000292539
-2.01506	0.00345357		-2.01787	0.00219607		-2.0137	0.00199231		-2.02054	0.000735226		-2.01336	0.000812145		-2.01873	0.00110836		-2.01874	0.00173511		-2.01663	0.000836546		-2.01343	0.00151042		-2.01414	0.000977878		-2.02026	0.00131353		-2.0169	0.000535998		-2.01968	0.000584618		-2.01609	0.000981502		-2.02089	0.000313389		-2.01772	0.00144185
-2.00974	0.0037764		-2.01287	0.00197852		-2.0087	0.00190334		-2.01585	0.00125846		-2.00648	0.00139422		-2.01061	0.000737262		-2.01436	0.00197286		-2.00851	0.000326389		-2.00811	0.00182361		-2.00914	0.000824985		-2.01558	0.000749852		-2.01065	0.00110847		-2.0153	0.000861733		-2.00953	0.000882866		-2.01432	0.000417111		-2.01178	0.00105995
-2.00631	0.00305608		-2.0085	0.00183363		-2.00432	0.00186877		-2.00804	0.00131104		-2.00242	0.00147346		-2.0053	0.00127119		-2.00874	0.00135359		-2.00257	0.000793674		-2.00405	0.00165672		-2.00508	0.00103904		-2.01026	0.000721592		-2.00658	0.000991159		-2.01062	0.000486226		-2.00547	0.000537746		-2.0062	0.00117537		-2.00772	0.00107288
-2.00006	0.00319622		-2.00131	0.00123049		-1.99745	0.00110423		-2.00085	0.00157813		-1.99711	0.00145726		-2.00123	0.000932665		-2.00061	0.00128073		-1.9985	0.00142534		-1.99718	0.00127337		-1.99758	0.000572287		-2.00245	0.000703687		-2.00065	0.00118653		-2.0028	0.000810517		-1.99984	0.000155663		-2.00057	0.000721394		-2.00116	0.000983756
-1.99256	0.00398587		-1.9935	0.00113166		-1.98932	0.00144697		-1.99616	0.00143344		-1.98898	0.00155533		-1.99436	0.000823822		-1.99374	0.000669075		-1.99226	0.00160997		-1.98874	0.00150548		-1.98977	0.000534701		-1.99526	0.00105014		-1.99221	0.00149239		-1.9953	0.000617345		-1.99172	0.000262537		-1.99651	0.000339819		-1.99304	0.00109157
-1.98662	0.0036491		-1.98881	0.0014887		-1.9837	0.00187706		-1.99148	0.000818717		-1.98211	0.00140538		-1.98623	0.000960733		-1.98968	0.000764781		-1.98413	0.00131697		-1.98374	0.0010876		-1.98508	0.00122378		-1.9912	0.0015642		-1.98627	0.00120914		-1.99124	0.000566342		-1.98516	0.000547673		-1.98964	0.000324272		-1.98741	0.00148234
-1.98224	0.00294768		-1.98506	0.00181135		-1.97964	0.0010739		-1.98398	0.00103975		-1.97835	0.00102667		-1.98061	0.00111307		-1.98436	0.00121199		-1.97788	0.00113364		-1.9803	0.00170305		-1.98133	0.000518137		-1.98683	0.00130447		-1.98252	0.00140515		-1.98718	0.000695124		-1.9814	0.000834076		-1.98151	0.000410004		-1.98366	0.00163017
-1.97631	0.00298693		-1.9785	0.00231372		-1.97307	0.00149833		-1.97617	0.0011428		-1.97367	0.00159912		-1.97717	0.00136161		-1.97624	0.00102145		-1.97413	0.00121723		-1.97405	0.00147867		-1.97477	0.000654892		-1.97933	0.00132346		-1.97752	0.00124092		-1.97999	0.000664522		-1.97641	0.00139717		-1.9762	0.00107343		-1.97804	0.000772199
-1.96849	0.00254615		-1.971	0.00127764		-1.96495	0.00138105		-1.97179	0.0011756		-1.96617	0.00139115		-1.97123	0.000581068		-1.96936	0.00130857		-1.96882	0.000776008		-1.96624	0.00159065		-1.96726	0.00082541		-1.97245	0.00109371		-1.96971	0.000675276		-1.97249	0.000905935		-1.96891	0.00118722		-1.97245	0.000906628		-1.97022	0.000334707
-1.96193	0.0043674		-1.96537	0.000645738		-1.95932	0.00199171		-1.96773	0.0012816		-1.95929	0.00115211		-1.96342	0.000945735		-1.96561	0.00133684		-1.96132	0.000565956		-1.9603	0.00139243		-1.96195	0.00117133		-1.96745	0.00101713		-1.96315	0.000608943		-1.9675	0.000824543		-1.96203	0.000970308		-1.96682	0.000859098		-1.96398	0.000976808
-1.95756	0.00318191		-1.961	0.00124044		-1.95589	0.00210454		-1.96116	0.000988222		-1.95461	0.00126222		-1.95749	0.000760616		-1.96093	0.000626007		-1.95507	0.000566602		-1.95593	0.00144499		-1.95758	0.00115774		-1.96276	0.00138257		-1.95846	0.00120189		-1.96312	0.000690236		-1.95734	0.000795002		-1.95901	0.00135195		-1.9596	0.00110475
-1.95256	0.00389966		-1.95506	0.00112366		-1.94964	0.00112486		-1.95366	0.000909989		-1.94992	0.00093517		-1.95342	0.00149938		-1.95343	0.00109236		-1.95038	0.000668074		-1.9503	0.00209347		-1.95133	0.000949423		-1.95589	0.00122358		-1.95346	0.000861905		-1.95624	0.00112015		-1.95234	0.000903987		-1.95307	0.00123579		-1.95429	0.00164191
-1.94474	0.00371752		-1.94694	0.0012692		-1.94214	0.00124881		-1.94835	0.00127907		-1.94273	0.00146142		-1.94748	0.0012472		-1.94655	0.00123222		-1.94538	0.00111532		-1.94249	0.00225222		-1.9432	0.00047864		-1.94808	0.00117979		-1.94596	0.000983694		-1.94843	0.000926549		-1.94516	0.00034681		-1.9487	0.00122935		-1.94647	0.00148714
-1.93756	0.00248269		-1.94069	0.00110009		-1.9362	0.00130361		-1.94398	0.00116698		-1.93492	0.00214003		-1.93967	0.0010323		-1.94186	0.000967287		-1.93757	0.000697373		-1.93562	0.00204885		-1.93695	0.000545318		-1.94245	0.00127967		-1.93846	0.00119293		-1.94281	0.000858757		-1.93734	0.000280701		-1.94308	0.00193652		-1.93929	0.000739854
-1.93318	0.00292034		-1.93631	0.00105619		-1.93214	0.00153634		-1.93741	0.00131693		-1.9296	0.00121274		-1.93311	0.00119942		-1.93718	0.000722801		-1.93038	0.000637051		-1.93124	0.00240989		-1.93289	0.0005536		-1.93839	0.0014434		-1.93377	0.00106517		-1.93843	0.000741451		-1.93234	0.000886879		-1.93526	0.00194985		-1.93459	0.00103623
-1.92818	0.00357261		-1.93069	0.00112604		-1.9262	0.00171145		-1.9296	0.00105152		-1.92523	0.000645994		-1.92873	0.00105351		-1.92999	0.000746945		-1.92569	0.00108128		-1.92593	0.00162132		-1.92726	0.00136181		-1.93183	0.00129865		-1.92908	0.0013032		-1.93218	0.000639446		-1.92828	0.000336672		-1.92807	0.000637216		-1.92991	0.00119124
-1.92037	0.00333049		-1.92287	0.00163381		-1.91839	0.0023947		-1.92335	0.000996634		-1.91867	0.000513337		-1.92342	0.000988158		-1.92218	0.000588377		-1.92101	0.00086283		-1.91811	0.00149948		-1.91914	0.000320438		-1.92401	0.00118022		-1.9219	0.000778082		-1.92406	0.000922511		-1.92109	0.000356948		-1.9237	0.000416223		-1.92241	0.00128109
-1.91287	0.00308433		-1.916	0.00167771		-1.91151	0.00188191		-1.91929	0.000914826		-1.91054	0.00136883		-1.91592	0.00130462		-1.91686	0.00164898		-1.91382	0.0010354		-1.91093	0.0018367		-1.91226	0.00107832		-1.91807	0.00152171		-1.91408	0.00110698		-1.91812	0.000534678		-1.91297	0.000754661		-1.9187	0.000509506		-1.91491	0.00080047
-1.90881	0.00304379		-1.91194	0.00176832		-1.90714	0.00129147		-1.91335	0.000798317		-1.90492	0.00137167		-1.90873	0.000992229		-1.91249	0.00162331		-1.90569	0.00151108		-1.90624	0.00191221		-1.9082	0.00137349		-1.91402	0.000985421		-1.90909	0.00174898		-1.91405	6.48159e-05		-1.90765	0.00110358		-1.9112	0.000549041		-1.91022	0.00110068
-1.90474	0.003648		-1.90662	0.00185288		-1.90214	0.00171772		-1.90554	0.000715036		-1.90085	0.00112978		-1.90405	0.00102844		-1.90593	0.00128442		-1.90069	0.00127389		-1.90155	0.00146708		-1.90289	0.00110847		-1.90745	0.000910349		-1.90471	0.00113257		-1.90781	0.000361694		-1.90359	0.00107486		-1.9037	0.00067564		-1.90585	0.00100556
-1.89756	0.00339322		-1.8985	0.00156007		-1.89432	0.00210292		-1.89898	0.000599158		-1.89429	0.00108468		-1.89936	0.00160993		-1.8978	0.00124549		-1.89663	0.000755326		-1.89374	0.00123519		-1.89477	0.000722419		-1.89933	0.00121668		-1.89752	0.000413356		-1.89968	0.000409084		-1.89672	0.00112534		-1.89901	0.00100658		-1.89835	0.000943985
-1.89006	0.00289118		-1.89162	0.00112453		-1.88714	0.00158143		-1.8946	0.00137518		-1.88617	0.00120727		-1.89155	0.0017822		-1.89218	0.00120503		-1.88944	0.00085529		-1.88624	0.000913843		-1.88757	0.00072157		-1.89339	0.00100074		-1.8894	0.000976869		-1.89374	0.000596944		-1.88859	0.00093398		-1.89432	0.000940388		-1.89053	0.000845034
-1.88506	0.0033602		-1.88787	0.00139593		-1.88245	0.000773833		-1.88898	0.00143743		-1.88054	0.00128498		-1.88405	0.00119192		-1.88811	0.000751078		-1.88132	0.00146347		-1.88186	0.00181246		-1.88383	0.00125712		-1.88995	0.00128074		-1.88471	0.00144632		-1.88999	0.000624995		-1.88328	0.000555065		-1.88651	0.0018328		-1.88585	0.0011589
-1.88068	0.00261054		-1.88319	0.00185028		-1.87776	0.0011014		-1.88116	0.00153501		-1.8771	0.000982017		-1.87967	0.0013494		-1.88155	0.00113521		-1.87663	0.00133292		-1.8778	0.00188818		-1.87914	0.000951122		-1.88433	0.00119553		-1.88096	0.000977082		-1.88468	0.000544241		-1.87984	0.000727414		-1.87901	0.000720283		-1.8821	0.00153481
-1.87381	0.0028644		-1.87569	0.00121492		-1.86995	0.00132929		-1.8746	0.00147024		-1.87117	0.00109804		-1.87561	0.00114028		-1.87343	0.000850047		-1.87288	0.00079906		-1.87093	0.00156404		-1.87195	0.00122123		-1.87651	0.000784152		-1.87471	0.0011379		-1.87687	0.000620107		-1.87359	0.00143878		-1.87464	0.000439988		-1.87522	0.00177153
-1.86599	0.00366212		-1.86881	0.0013516		-1.86245	0.000962489		-1.87085	0.00139853		-1.86335	0.00138962		-1.86873	0.00124655		-1.8678	0.000804368		-1.86632	0.000436693		-1.86343	0.00253066		-1.86508	0.000763403		-1.87026	0.000591727		-1.8669	0.00146808		-1.8703	0.00105002		-1.86609	0.00133592		-1.87089	0		-1.86772	0.000736979
-1.86037	0.00304508		-1.86412	0.000847072		-1.85839	0.00160752		-1.86585	0.0013531		-1.85742	0.000954434		-1.86123	0.00136525		-1.86405	0.000757603		-1.85882	0.000536441		-1.85811	0.00289984		-1.86008	0.000452945		-1.86589	0.000594747		-1.86127	0.00109524		-1.86593	0.000912735		-1.86016	0.00127572		-1.86401	0.000590796		-1.86241	0.00145886
-1.85631	0.00370505		-1.85944	0.00115415		-1.85401	0.00134445		-1.85835	0.00116341		-1.85304	0.00129549		-1.85624	0.000599065		-1.85843	0.0011065		-1.85319	0.000653855		-1.85374	0.00201174		-1.85539	0.00113905		-1.86058	0.000426483		-1.85689	0.000502298		-1.86062	0.000599706		-1.85578	0.000772614		-1.85651	0.000723837		-1.85803	0.00121879
-1.85006	0.00347356		-1.85225	0.00195322		-1.84714	0.00161561		-1.85147	0.000767192		-1.84742	0.000979609		-1.85186	0.00127505		-1.85061	0.00143125		-1.84882	0.000601288		-1.84718	0.0013669		-1.84851	0.000770623		-1.85308	0.00130836		-1.85096	0.000681462		-1.85312	0.000632858		-1.84984	0.000817602		-1.8512	0.000899743		-1.85147	0.00104677
-1.84193	0.0042302		-1.84444	0.00201636		-1.83964	0.00160914		-1.84679	0.00133775		-1.83992	0.00121034		-1.84498	0.00174727		-1.84468	0.000741289		-1.84288	0.00061723		-1.83905	0.00073558		-1.8407	0.000503485		-1.84558	0.00210632		-1.84315	0.00120786		-1.84593	0.000691299		-1.84172	0.000924897		-1.84682	0.000314499		-1.84366	0.0012291
-1.83568	0.00360379		-1.83913	0.00180552		-1.83464	0.00123304		-1.8421	0.00164122		-1.83273	0.00135591		-1.83717	0.00061085		-1.8403	0.00049267		-1.83507	0.000508219		-1.83311	0.00117084		-1.83508	0.00059331		-1.84089	0.00197106		-1.83627	0.00105387		-1.84093	0.000992427		-1.83516	0.000783385		-1.84026	0.000546598		-1.83741	0.00111984
-1.83162	0.00398679		-1.83475	0.00134943		-1.83026	0.00115438		-1.83492	0.00106099		-1.82835	0.00118166		-1.83123	0.000819965		-1.83468	0.000908341		-1.82851	0.0010229		-1.82936	0.00174403		-1.83102	0.000583542		-1.83651	0.000975929		-1.83221	0.00111209		-1.83656	0.000973939		-1.83078	0.000482197		-1.83245	0.000784693		-1.83334	0.000550817
-1.82568	0.00361388		-1.82819	0.00135073		-1.8237	0.00106197		-1.8271	0.000895899		-1.82336	0.00100456		-1.82717	0.000628204		-1.82718	0.00124658		-1.82444	0.00100631		-1.82311	0.00199201		-1.82446	0.00110423		-1.82901	0.00121042		-1.8269	0.00178417		-1.82937	0.00096225		-1.82547	0.00082246		-1.82651	0.000976591		-1.82772	0.000683071
-1.81724	0.00294584		-1.82038	0.00204642		-1.81589	0.00139258		-1.82179	0.00109695		-1.81586	0.000789378		-1.82092	0.0009978		-1.81999	0.000912691		-1.81882	0.0008359		-1.81499	0.00216727		-1.81633	0.00160092		-1.82151	0.00159333		-1.81877	0.001974		-1.82156	0.000698737		-1.81765	0.000661939		-1.82245	0.00112029		-1.8196	0.00115962
-1.81131	0.00310304		-1.81444	0.00196295		-1.80995	0.00149105		-1.81773	0.00165678		-1.80836	0.0010501		-1.8128	0.000897955		-1.8153	0.000107235		-1.811	0.000958269		-1.80874	0.00212479		-1.81039	0.000672517		-1.81651	0.0013213		-1.8119	0.00129296		-1.81656	0.00115054		-1.81047	0.00060998		-1.81651	0.00101768		-1.81304	0.00105084
-1.80756	0.00377108		-1.81037	0.00235221		-1.80589	0.0014221		-1.81085	0.00158906		-1.80367	0.000921817		-1.80655	0.000793183		-1.8103	0.000425458		-1.80413	0.000598272		-1.80468	0.00154774		-1.80633	0.00129237		-1.81214	0.001062		-1.80753	0.000584841		-1.81218	0.00052809		-1.80609	0.000245217		-1.80839	0.000468195		-1.80897	0.00149169
-1.80224	0.00395634		-1.80381	0.00130424		-1.79964	0.00190941		-1.80273	0.00130704		-1.79898	0.000843448		-1.8028	0.000875887		-1.8028	0.000466351		-1.79976	0.000743262		-1.79874	0.00159944		-1.80008	0.00133909		-1.80464	0.001545		-1.80221	0.000881314		-1.80499	0.00066686		-1.8014	0.000516202		-1.80182	0.000448206		-1.80335	0.00160142
-1.79474	0.00313514		-1.79569	0.00162429		-1.79151	0.00186452		-1.79741	0.00172219		-1.79148	0.00169784		-1.79686	0.00115378		-1.7953	0.000651238		-1.79444	0.000816726		-1.79061	0.00122875		-1.79164	0.000991469		-1.79683	0.00175857		-1.79439	0.00114153		-1.79718	0.000764827		-1.79359	0.00125185		-1.79776	0.000615006		-1.79522	0.00108414
-1.78849	0.00371257		-1.79037	0.00269822		-1.78526	0.00110808		-1.79335	0.001245		-1.78367	0.00104003		-1.78874	0.000852747		-1.7903	0.000826338		-1.78663	0.000897946		-1.78436	0.000881237		-1.78601	0.00116135		-1.79214	0.00130361		-1.78721	0.000998837		-1.79218	0.000573568		-1.78609	0.000556966		-1.79214	0.00141613		-1.78835	0.00073051
-1.78381	0.00321493		-1.78662	0.00198825		-1.7812	0.00123931		-1.78648	0.000533754		-1.77929	0.000891389		-1.78217	0.000600779		-1.78593	0.00110345		-1.77944	0.000765667		-1.78061	0.00151106		-1.78258	0.00106091		-1.78839	0.000745106		-1.78315	0.001133		-1.78843	0.000531915		-1.78203	0.000510077		-1.7837	0.000491294		-1.7846	0.00140927
-1.77849	0.00349447		-1.781	0.00187493		-1.77526	0.00122333		-1.77835	0.00136551		-1.77523	0.00127491		-1.77842	0.000654558		-1.77843	0.00108279		-1.77538	0.00140746		-1.77561	0.00158292		-1.77696	0.000642788		-1.78182	0.000852751		-1.77877	0.000936343		-1.78187	0.000932074		-1.77765	0.00105902		-1.77714	0.000510395		-1.77991	0.00172792
-1.77131	0.00344293		-1.77319	0.00210135		-1.76714	0.00103468		-1.77273	0.00147928		-1.76835	0.000894454		-1.77342	0.00067577		-1.77093	0.00102689		-1.771	0.00046944		-1.7678	0.00114188		-1.76946	0.000519412		-1.77433	0.000949827		-1.77158	0.000865104		-1.77406	0.00052724		-1.77078	0.00115512		-1.7737	0.000808014		-1.77241	0.000726916
-1.76381	0.00297024		-1.76694	0.00231155		-1.76057	0.00124214		-1.76929	0.00154974		-1.76117	0.000351346		-1.76592	0.000781828		-1.76655	0.000850699		-1.76382	0.000813279		-1.76124	0.00074223		-1.7632	0.000366519		-1.76901	0.00121193		-1.7644	0.00103872		-1.76874	0.000675573		-1.76328	0.000505008		-1.7687	0.000939056		-1.76553	0.00054363
-1.75912	0.00242381		-1.76256	0.00221143		-1.75714	0.00146901		-1.76335	0.00107571		-1.75585	0.000632422		-1.75936	0.00079704		-1.76218	0.000725411		-1.75663	0.000799706		-1.75686	0.00112064		-1.75883	0.00103691		-1.76464	0.00141557		-1.7594	0.000877689		-1.76437	0.000851745		-1.75828	0.000787398		-1.7612	0.00119225		-1.76085	0.000342135
-1.75443	0.00361315		-1.75725	0.00222829		-1.75182	0.00150763		-1.75585	0.000571819		-1.75148	0.00124076		-1.75467	0.00126734		-1.7553	0.000775004		-1.75163	0.000966456		-1.75186	0.00108438		-1.75321	0.000886142		-1.75807	0.00121107		-1.75502	0.00115006		-1.75812	0.00144274		-1.7539	0.000991007		-1.75464	0.000857321		-1.75616	0.00102545
-1.74724	0.00380648		-1.74944	0.0028669		-1.74432	0.00148054		-1.74991	0.000822292		-1.74492	0.00126703		-1.74967	0.00166071		-1.74811	0.00103994		-1.74694	0.000515759		-1.74405	0.00158421		-1.74571	0.000648096		-1.75026	0.00117957		-1.74815	0.00149474		-1.75031	0.00128888		-1.74703	0.000479029		-1.74995	0.000611008		-1.74897	0.00114764
-1.73943	0.00306562		-1.74225	0.00242141		-1.73776	0.00116308		-1.74554	0.000974132		-1.7371	0.00131191		-1.74217	0.00142439		-1.7428	0.00106995		-1.74007	0.000623263		-1.73655	0.00110326		-1.73852	0.000963226		-1.74401	0.00110666		-1.74033	0.00148386		-1.74374	0.00076164		-1.73922	0.000809998		-1.74495	0.00163202		-1.74116	0.000222579
-1.73443	0.00277819		-1.73788	0.00305634		-1.73307	0.00162855		-1.73991	0.00126561		-1.73117	0.00162079		-1.73467	0.00109143		-1.73843	0.000862662		-1.73225	0.000944481		-1.73186	0.000843696		-1.73383	0.000857687		-1.73964	0.00101174		-1.7344	0.00177927		-1.73968	0.000743789		-1.73328	0.000939049		-1.73776	0.000824006		-1.73585	0.00023384
-1.73006	0.00359793		-1.73319	0.00285565		-1.72807	0.00163664		-1.7321	0.000958569		-1.7271	0.000927509		-1.72998	0.000580639		-1.73186	0.00115065		-1.72663	0.00134326		-1.72718	0.000916203		-1.72914	0.000360997		-1.73402	0.00136164		-1.73033	0.00189295		-1.73437	0.000719138		-1.72921	0.00121236		-1.73026	0.000698739		-1.73147	0.000484211
-1.72287	0.00432081		-1.72537	0.00244779		-1.72089	0.00139965		-1.72523	0.00051083		-1.72117	0.00112431		-1.7253	0.000289891		-1.72405	0.00116849		-1.72257	0.000860675		-1.7203	0.00117684		-1.72164	0.000911837		-1.72589	0.00109177		-1.72408	0.000944235		-1.72624	0.000443723		-1.72297	0.00112259		-1.72526	0.000581912		-1.72491	0.000534046
-1.71506	0.00378227		-1.71788	0.00216061		-1.71339	0.00136002		-1.72054	0.000898422		-1.71304	0.000741657		-1.71842	0.00115399		-1.7178	0.00128094		-1.71632	0.000179029		-1.71249	0.00100244		-1.71414	0.00165719		-1.71901	0.000712747		-1.71596	0.00125116		-1.71937	0.00139599		-1.71484	0.00128037		-1.72088	0.000822229		-1.71678	0.00107073
-1.71006	0.00357628		-1.71319	0.00312381		-1.70839	0.00131149		-1.71554	0.00145846		-1.70648	0.000476342		-1.71061	0.00129326		-1.71374	0.00125114		-1.70819	0.000442725		-1.70718	0.00149111		-1.70914	0.00123716		-1.71495	0.000695921		-1.70971	0.00163018		-1.71499	0.000686836		-1.70859	0.00133		-1.71401	0.000375578		-1.71116	0.000963631
-1.70662	0.00336479		-1.7085	0.00234291		-1.70401	0.00147042		-1.70804	0.00136993		-1.70242	0.000950713		-1.7053	0.00108415		-1.7078	0.000704312		-1.70226	0.000810694		-1.7028	0.00142761		-1.70477	0.000772534		-1.70964	0.00112888		-1.70596	0.00106752		-1.70999	0.000551041		-1.70453	0.000947286		-1.70589	0.000295842		-1.70709	0.00151684
-1.70006	0.0035539		-1.701	0.00279359		-1.69682	0.00128359		-1.70054	0.00141367		-1.69679	0.000655845		-1.70123	0.000791469		-1.69968	0.00120677		-1.69819	0.000696296		-1.69593	0.00131992		-1.69727	0.000877861		-1.70151	0.00155105		-1.69971	0.000732011		-1.70187	0.000773966		-1.69859	0.000757617		-1.70057	0.000408671		-1.70022	0.00099933
-1.69256	0.00295666		-1.6935	0.00261258		-1.68901	0.00108988		-1.69585	0.000438485		-1.68835	0.000481814		-1.69405	0.000615563		-1.69311	0.00100448		-1.69226	0.00059504		-1.6878	0.00156962		-1.68945	0.000683984		-1.69433	0.000918115		-1.69127	0.000704284		-1.69468	0.000799679		-1.69046	0.000985938		-1.6962	0.000707401		-1.69209	0.000721885
-1.68693	0.00246893		-1.68912	0.00162732		-1.6837	0.00178		-1.69117	0.00159096		-1.68179	0.000483346		-1.68623	0.000241683		-1.68905	0.00120829		-1.68382	0.00104014		-1.6828	0.00125621		-1.68476	0.000333604		-1.69058	0.000765384		-1.68533	0.000652028		-1.69093	0.00038677		-1.68422	0.000750648		-1.68932	0.00080868		-1.68647	0.00122574
-1.68256	0.00261292		-1.68537	0.00180768		-1.67964	0.00128521		-1.68366	0.00135016		-1.67804	0.00104944		-1.68123	0.000331457		-1.68343	0.00116392		-1.67788	0.00122994		-1.67905	0.00107194		-1.68102	0.00030345		-1.68589	0.00079127		-1.6819	0.00101014		-1.68655	0.000494726		-1.68078	0.000913703		-1.6812	0.00114961		-1.68304	0.00089415
-1.67662	0.00315036		-1.6785	0.00203583		-1.67245	0.00145445		-1.67616	0.00136109		-1.67304	0.00115495		-1.67748	0.000237826		-1.6753	0.0017325		-1.67444	0.00156279		-1.6728	0.000987852		-1.67414	0.000667633		-1.67839	0.000954141		-1.67658	0.000865531		-1.67905	0.000951625		-1.67547	0.000597096		-1.67589	0.00062811		-1.67709	0.000734583
-1.66849	0.00344018		-1.671	0.00200988		-1.66432	0.000747749		-1.6721	0.00127802		-1.66585	0.000788722		-1.67123	0.000546572		-1.66874	0.00174882		-1.66882	0.00111532		-1.6653	0.00106808		-1.66696	0.0012172		-1.67152	0.000579862		-1.66877	0.000980281		-1.67187	0.000877246		-1.66765	0.00096714		-1.67245	0.000550374		-1.66928	0.000635632
-1.66224	0.0034754		-1.66569	0.00248888		-1.65932	0.00113456		-1.66804	0.00105384		-1.65898	0.00113525		-1.66342	0.000702552		-1.66499	0.00149063		-1.66101	0.00128121		-1.65936	0.00109726		-1.66164	0.00122463		-1.66683	0.00134395		-1.66252	0.00102166		-1.66718	0.00111483		-1.66109	0.000914337		-1.6662	0.000494181		-1.66335	0.000860367
-1.65787	0.00325125		-1.66131	0.00246012		-1.65589	0.00130704		-1.66116	0.0013388		-1.65429	0.000614472		-1.6578	0.000758473		-1.65999	0.00116218		-1.65475	0.00115087		-1.6553	0.00105972		-1.65727	0.00112546		-1.66183	0.000898485		-1.65815	0.0011042		-1.66249	0.000989452		-1.65672	0.000680948		-1.6587	0.000993471		-1.65898	0.00138507
-1.65256	0.00301243		-1.65475	0.00244498		-1.64964	0.00111758		-1.65366	0.000923028		-1.64929	0.000913936		-1.65342	0.00126177		-1.65249	0.0010606		-1.65038	0.000871016		-1.64936	0.00132872		-1.6507	0.000728578		-1.65464	0.00149237		-1.65283	0.000961298		-1.65562	0.0013911		-1.65172	0.000739664		-1.65276	0.00161092		-1.65334	0.00107887
-1.64474	0.00209639		-1.64694	0.00247093		-1.64182	0.00150217		-1.64866	0.000972029		-1.64211	0.00057069		-1.64748	0.00163929		-1.64593	0.000924872		-1.64507	0.000789581		-1.64124	0.00102067		-1.64289	0.00093562		-1.64683	0.00127298		-1.64502	0.000875129		-1.6478	0.000831556		-1.6439	0.000571117		-1.64839	0.00119625		-1.64522	0.00123197
-1.63787	0.00270262		-1.64069	0.00175167		-1.6362	0.00102982		-1.64429	0.00164879		-1.6346	0.00086315		-1.63967	0.00151738		-1.64124	0.000394789		-1.63757	0.000873602		-1.63468	0.0014555		-1.63664	0.000680799		-1.64151	0.000330487		-1.63783	0.000793012		-1.64218	0.000176809		-1.6364	0.000268028		-1.64276	0.000432658		-1.63835	0.000552734
-1.63349	0.00248672		-1.63663	0.00256176		-1.63182	0.00140087		-1.63741	0.0016633		-1.6296	0.000918096		-1.63311	0.000780971		-1.63624	0.000406535		-1.63038	0.00136006		-1.6303	0.00106401		-1.63258	0.000431498		-1.63714	0.00126564		-1.63315	0.00118376		-1.63812	0.000690236		-1.63172	0.000980446		-1.63495	0		-1.63397	0.000755667
-1.62818	0.0025999		-1.63069	0.00208081		-1.62589	0.00163886		-1.6296	0.00164627		-1.62523	0.000983549		-1.62874	0.000996728		-1.62905	0.000701484		-1.62569	0.00100351		-1.62499	0.00171464		-1.62664	0.000817128		-1.63058	0.00141557		-1.62846	0.00119869		-1.63156	0.000345968		-1.62703	0.000668908		-1.62807	0.000454869		-1.62897	0.00179501
-1.62037	0.00201183		-1.62287	0.00306693		-1.61807	0.00126903		-1.62366	0.00116383		-1.61836	0.00115539		-1.62342	0.00118313		-1.62124	0.000365642		-1.62101	0.00118922		-1.61718	0.00158378		-1.61883	0.000674003		-1.62245	0.00118906		-1.62096	0.00100246		-1.62343	0.00106872		-1.61984	0.00032928		-1.6237	0.000545709		-1.62116	0.00117926
-1.61318	0.00268886		-1.61631	0.00226246		-1.61151	0.00174057		-1.6196	0.00127319		-1.61023	0.00158073		-1.61561	0.00137018		-1.61624	0.000826773		-1.61351	0.000578021		-1.60999	0.00161381		-1.61195	0.00103139		-1.61714	0.00153767		-1.61346	0.00143822		-1.61749	0.000782891		-1.61203	0.00019347		-1.61839	0.000655873		-1.61366	0.000600412
-1.60912	0.00340166		-1.61194	0.00217683		-1.60745	0.00119543		-1.61335	0.00116782		-1.60492	0.00157241		-1.60873	0.00119513		-1.61186	0.000474182		-1.60601	0.000830945		-1.60561	0.00144349		-1.60789	0.00174489		-1.61308	0.00115347		-1.60846	0.00169544		-1.61343	0.00137813		-1.60703	0		-1.61057	0.00124623		-1.60897	0.00123173
-1.60474	0.00298418		-1.60631	0.00259917		-1.60214	0.000620361		-1.60523	0.00135394		-1.60054	0.000902116		-1.60436	0.00122406		-1.60499	0.000652543		-1.60101	0.000495508		-1.60061	0.00189011		-1.60227	0.00154464		-1.6062	0.00124947		-1.60377	0.00117736		-1.60718	0.0015813		-1.60266	0.00045305		-1.60338	0.0017333		-1.6046	0.000975371
-1.59756	0.00258632		-1.59819	0.00250575		-1.59432	0.000884843		-1.59898	0.00147781		-1.59367	0.00137517		-1.59936	0.00105736		-1.59686	0.000405665		-1.59663	0.0010326		-1.5928	0.00162711		-1.59414	0.00128834		-1.59807	0.00112499		-1.59659	0.00123388		-1.59874	0.00121641		-1.59578	0.00107085		-1.59901	0.00138548		-1.5971	0.000409938
-1.59037	0.00275288		-1.59162	0.00225533		-1.58714	0.00123546		-1.59491	0.00181998		-1.58554	0.00139641		-1.59155	0.00117628		-1.59155	0.000607083		-1.58913	0.00133959		-1.58561	0.0014836		-1.58758	0.000941354		-1.59276	0.00152969		-1.58878	0.00116947		-1.5928	0.00115712		-1.58765	0.000658137		-1.59401	0.00133107		-1.58929	0.000633955
-1.58537	0.00237061		-1.58787	0.00242228		-1.58276	0.00200788		-1.58929	0.000819558		-1.58023	0.00139947		-1.58405	0.00122491		-1.58718	0.000353896		-1.58132	0.00131159		-1.58155	0.00101209		-1.58383	0.000750662		-1.58901	0.000690959		-1.58408	0.000728172		-1.58937	0.00125042		-1.58265	0.000744945		-1.5862	0.00093106		-1.58491	0.000682592
-1.58068	0.00317292		-1.58319	0.00251483		-1.57776	0.00164756		-1.58117	0.00121598		-1.57679	0.00173309		-1.57998	0.000853176		-1.58061	0.000483535		-1.57663	0.00124459		-1.57718	0.000618453		-1.57883	0.000752998		-1.58308	0.00112607		-1.58034	0.00118973		-1.58374	0.000990302		-1.57891	0.000905466		-1.5787	0.000657428		-1.58116	0.000884327
-1.57381	0.00322135		-1.57537	0.00249796		-1.56995	0.00202729		-1.5746	0.00154637		-1.57085	0.000930355		-1.57561	0.000327172		-1.57249	0.000203811		-1.57288	0.000596117		-1.56999	0.00160802		-1.57133	0.000795044		-1.57558	0.00142528		-1.57377	0.00157387		-1.57624	0.0011924		-1.57265	0.00142589		-1.57464	0.000476635		-1.57428	0.00129954
-1.56599	0.00249975		-1.56881	0.00197982		-1.56245	0.00165868		-1.57116	0.000676971		-1.56304	0.00106936		-1.56842	0.000203117		-1.56718	0.000547049		-1.56632	0.00114268		-1.56249	0.00230928		-1.56445	0.000732825		-1.56964	0.00150488		-1.56627	0.00143374		-1.56968	0.000921873		-1.56515	0.00124087		-1.57057	0.000587465		-1.56678	0.00116465
-1.56037	0.00319108		-1.56412	0.00273498		-1.55839	0.00138348		-1.56617	0.000376656		-1.5571	0.000978514		-1.56123	0.000365524		-1.56374	0.000949233		-1.55882	0.000911734		-1.5578	0.00177642		-1.55976	0.00155484		-1.56526	0.00175663		-1.56096	0.00107775		-1.5653	0.000442236		-1.55922	0.00115216		-1.56339	0.00050462		-1.56147	0.000949255
-1.55631	0.00410455		-1.55912	0.00243222		-1.55401	0.0011014		-1.55835	0.000784227		-1.55304	0.00150061		-1.55623	0.00110107		-1.55749	0.00153805		-1.55351	0.00109464		-1.55311	0.00166959		-1.55508	0.00186147		-1.55964	0.00159376		-1.55659	0.000939969		-1.55999	0.000775241		-1.55516	0.000988261		-1.5562	0.000421997		-1.5571	0.000696488
-1.54974	0.00333783		-1.55194	0.00229598		-1.54682	0.00131331		-1.55179	0.000966771		-1.5471	0.00134431		-1.55186	0.000957733		-1.54999	0.0014878		-1.54913	0.000918413		-1.54624	0.00184099		-1.54789	0.00136075		-1.55183	0.0012156		-1.55033	0.000715162		-1.55218	0.00119941		-1.54921	0.00112513		-1.5512	0.0001035		-1.55053	0.000703436
-1.54193	0.00243353		-1.54444	0.00273325		-1.53964	0.00156364		-1.5471	0.000438696		-1.53929	0.0014229		-1.54498	0.000718836		-1.54405	0.00109475		-1.54257	0.00104186		-1.53843	0.00149476		-1.54008	0.00136266		-1.54464	0.000959318		-1.54221	0.000968124		-1.54499	0.00081243		-1.54109	0.00162929		-1.54682	0.000603679		-1.54241	0.000618382
-1.53599	0.00324519		-1.53913	0.00333271		-1.53464	0.00181053		-1.5421	0.000459937		-1.53273	0.00130447		-1.53686	0.000669556		-1.53968	0.00110519		-1.53476	0.000958915		-1.5328	0.00121159		-1.53508	0.0012		-1.54026	0.00121538		-1.53596	0.00117267		-1.54031	0.00100369		-1.53453	0.00119102		-1.53995	0.00145745		-1.53647	0.00106546
-1.53193	0.00335067		-1.53506	0.00250229		-1.53026	0.00114609		-1.53492	0.00111356		-1.52836	0.00120968		-1.53124	0.00135068		-1.53405	0.00078327		-1.52851	0.00106491		-1.52874	0.00179615		-1.5307	0.000749813		-1.53526	0.00147058		-1.5319	0.00115347		-1.53562	0.00103238		-1.53047	0.00133402		-1.53182	0.00175151		-1.53241	0.00095812
-1.52568	0.00302802		-1.52819	0.00216126		-1.52339	0.000937214		-1.5271	0.00132282		-1.52304	0.00176658		-1.52717	0.00127998		-1.52624	0.000924001		-1.52413	0.000696943		-1.52218	0.00186072		-1.52414	0.000629834		-1.52745	0.00177734		-1.52628	0.00131152		-1.52812	0.000835169		-1.52515	0.00132219		-1.5262	0.00137904		-1.52648	0.00119484
-1.51724	0.00286275		-1.52006	0.00212082		-1.51557	0.000374481		-1.5221	0.000200841		-1.51523	0.00148528		-1.52092	0.000844605		-1.51936	0.000799366		-1.51851	0.000740676		-1.51405	0.0011614		-1.51602	0.000431073		-1.52026	0.00154414		-1.51815	0.00131152		-1.52062	0.000500039		-1.51703	0.000922785		-1.52213	0.000792689		-1.51835	0.00109109
-1.51131	0.0030359		-1.51475	0.00236064		-1.50964	0.000872104		-1.51773	0.000852365		-1.50804	0.000898832		-1.5128	0.00112164		-1.51499	0.000283856		-1.51069	0.00063942		-1.50811	0.00111785		-1.51039	0.00103224		-1.51558	0.00157283		-1.51127	0.00129488		-1.51562	0.00104045		-1.50984	0.000746846		-1.51589	0.000473081		-1.51209	0.00115674
-1.50787	0.00228569		-1.51069	0.00225425		-1.50557	0.000384591		-1.51085	0.00102923		-1.50336	0.00120027		-1.50686	0.00028582		-1.50999	0.00127638		-1.50382	0.000453713		-1.50405	0.00110991		-1.50633	0.000810545		-1.51089	0.00110536		-1.5069	0.000911602		-1.51124	0.000815405		-1.50547	0.000549785		-1.50776	0.000363806		-1.50772	0.000960996
-1.50224	0.00261457		-1.50381	0.00227955		-1.49932	0.000971589		-1.50273	0.00115647		-1.49867	0.00146142		-1.5028	0.000137554		-1.50218	0.0013897		-1.49976	0.000788719		-1.49812	0.00138171		-1.49945	0.000925852		-1.50339	0.000722023		-1.5019	0.000776376		-1.50374	0.000953963		-1.50047	0.000792256		-1.50151	0.000798686		-1.5021	0.00044995
-1.49474	0.00298399		-1.49538	0.00177351		-1.4912	0.00109251		-1.49741	0.001204		-1.49085	0.00112212		-1.49655	0.00061642		-1.49468	0.000914431		-1.49444	0.000697589		-1.48968	0.00168246		-1.49133	0.00117749		-1.49589	0.00117979		-1.49377	0.000569484		-1.49593	0.000975639		-1.49266	0.000821615		-1.49745	0.000990584		-1.49397	0.000946859
-1.48818	0.0027725		-1.49006	0.00134835		-1.48526	0.000937416		-1.49335	0.0014898		-1.48336	0.000960564		-1.48842	0.000791898		-1.48999	0.000385218		-1.48632	0.00148566		-1.48374	0.0012605		-1.4857	0.00106133		-1.49151	0.000653208		-1.4869	0.000658853		-1.49124	0.000300916		-1.48547	0.000243739		-1.49151	0.00063122		-1.48741	0.0013302
-1.48381	0.00266061		-1.48662	0.002525		-1.4812	0.00060196		-1.48648	0.00103281		-1.47898	0.001225		-1.48248	0.000508863		-1.4853	0.000594032		-1.47944	0.0018058		-1.4803	0.00115217		-1.48226	0.00124756		-1.48745	0.000999658		-1.48283	0.000828632		-1.48749	0.000758665		-1.4814	0.000689818		-1.48339	0.000478856		-1.48397	0.00192558
-1.47849	0.00298546		-1.48069	0.00187904		-1.47495	0.000966331		-1.47835	0.000989694		-1.47492	0.00137758		-1.47873	0.000998443		-1.4778	0.00104472		-1.47569	0.00162483		-1.47468	0.00165993		-1.47633	0.00118789		-1.48057	0.000931274		-1.47846	0.00138724		-1.48062	0.001138		-1.47703	0.00144722		-1.47714	0.00117893		-1.47897	0.00131199
-1.47099	0.00357463		-1.47288	0.00245688		-1.46682	0.0009635		-1.47335	0.000562355		-1.46804	0.00126309		-1.47342	0.000757831		-1.4703	0.00120829		-1.471	0.000743046		-1.46718	0.00149089		-1.46883	0.000836452		-1.47307	0.00139184		-1.47096	0.00160842		-1.47312	0.000825181		-1.46985	0.00152178		-1.47339	0.00129109		-1.47116	0.00110259
-1.46349	0.00389581		-1.46694	0.00207216		-1.46057	0.00128925		-1.4696	0.000598317		-1.46054	0.00116568		-1.46592	0.000230542		-1.46593	0.000622744		-1.4635	0.00125773		-1.46061	0.00145722		-1.46289	0.00108151		-1.46776	0.000906898		-1.46409	0.00120658		-1.4678	0.000697887		-1.46265	0.00130592		-1.46807	0.000304505		-1.46429	0.00101898
-1.45881	0.0032584		-1.46256	0.00291555		-1.45714	0.000764936		-1.46335	0.000629442		-1.45554	0.00120574		-1.45936	0.000827465		-1.46186	0.000365859		-1.45632	0.00106383		-1.45624	0.00174317		-1.45851	0.000812881		-1.46339	0.00078976		-1.45908	0.00146999		-1.46343	0.000617557		-1.45765	0.0007912		-1.46057	0.000143035		-1.4596	0.00076573
-1.45443	0.00329527		-1.45694	0.00261539		-1.45182	0.000689717		-1.45585	0.000895899		-1.45117	0.00138502		-1.45467	0.00114735		-1.45468	0.00126398		-1.45163	0.000509942		-1.45124	0.00192272		-1.45289	0.000738346		-1.45683	0.00146648		-1.4544	0.00141305		-1.45687	0.000868108		-1.45297	0.00110612		-1.45401	0.00101701		-1.4546	0.000757344
-1.44693	0.00351263		-1.44913	0.00247245		-1.44432	0.00115438		-1.44991	0.00125552		-1.44429	0.0020667		-1.44967	0.00117413		-1.44749	0.00104624		-1.44694	0.000797337		-1.44343	0.00201775		-1.44508	0.00061773		-1.4487	0.00116274		-1.44752	0.00073905		-1.44905	0.00136283		-1.4461	0.000965873		-1.44964	0.000499068		-1.44741	0.00018113
-1.43943	0.00278204		-1.44225	0.00183514		-1.43776	0.00134991		-1.44585	0.00118149		-1.43648	0.00122851		-1.44217	0.00151909		-1.44249	0.000634272		-1.43975	0.000779886		-1.43593	0.00179572		-1.4382	0.000440841		-1.44276	0.000988441		-1.43971	0.000816048		-1.44281	0.000872783		-1.43828	0.000619274		-1.44432	0.000553039		-1.43991	0.00060784
-1.43443	0.0035473		-1.43787	0.00256933		-1.43307	0.00138408		-1.43991	0.00129674		-1.43086	0.00111993		-1.43467	0.000872887		-1.4378	0.000520295		-1.43225	0.000902901		-1.43124	0.00176827		-1.43383	0.00122633		-1.4387	0.00051493		-1.43408	0.00101675		-1.43843	0.00100964		-1.43265	0.001605		-1.43682	0.00163868		-1.43459	0.000772917
-1.43006	0.00295575		-1.43288	0.00291253		-1.42807	0.00162632		-1.4321	0.00118612		-1.42648	0.00193514		-1.42999	0.000593923		-1.43124	0.00137469		-1.42694	0.000974642		-1.42655	0.000908051		-1.42883	0.00118768		-1.43276	0.000972693		-1.43002	0.0016963		-1.4328	0.000696187		-1.42859	0.00140752		-1.42964	0.00098281		-1.43022	0.000738416
-1.42256	0.00326849		-1.42506	0.00234183		-1.42057	0.00118754		-1.42523	0.00115668		-1.42054	0.00150914		-1.4253	0.000812466		-1.42343	0.000924437		-1.42257	0.000411487		-1.41936	0.00142118		-1.42101	0.000674003		-1.42464	0.00133877		-1.42346	0.00130576		-1.42499	0.0012366		-1.42203	0.000748113		-1.42464	0.000815566		-1.42335	0.00125761
-1.41474	0.00332407		-1.41788	0.00248823		-1.41307	0.0008442		-1.42085	0.000927444		-1.41242	0.00117071		-1.41811	0.000800896		-1.41749	0.000465481		-1.416	0.000370554		-1.41155	0.0017865		-1.41351	0.000719234		-1.41807	0.00101023		-1.41534	0.000734784		-1.41812	0.00164462		-1.41391	0.000375957		-1.42026	0.000694741		-1.41522	0.00117735
-1.41006	0.00264869		-1.41319	0.00254122		-1.40839	0.000967747		-1.41554	0.000537329		-1.40586	0.00119129		-1.4103	0.00127526		-1.41343	0.00102297		-1.40819	0.000423982		-1.40655	0.00122854		-1.40883	0.000782303		-1.41402	0.00118949		-1.4094	0.00158517		-1.41405	0.00142106		-1.40796	0.000843792		-1.41307	0.000806015		-1.40991	0.000370166
-1.40631	0.00267639		-1.4085	0.00191256		-1.40401	0.00149125		-1.40773	0.000679074		-1.40179	0.000992962		-1.4053	0.000368095		-1.40718	0.00110323		-1.40257	0.0004354		-1.40218	0.00117663		-1.40414	0.000662749		-1.40839	0.000924371		-1.40533	0.0017253		-1.40874	0.00096055		-1.4039	0.000726147		-1.40526	0.00108076		-1.40585	0.000560401
-1.39974	0.00262429		-1.40069	0.00221143		-1.39651	0.00125407		-1.40054	0.0011613		-1.39617	0.000469117		-1.40092	0.000423374		-1.39905	0.00136055		-1.39851	0.00094405		-1.39499	0.00104813		-1.39664	0.000675914		-1.39995	0.000751146		-1.39909	0.0013947		-1.40062	0.00108083		-1.39797	0.00111583		-1.39995	0.000625445		-1.39897	0.00104174
-1.39224	0.00310707		-1.39319	0.00277499		-1.3887	0.00101001		-1.39616	0.00156235		-1.38804	0.000932762		-1.39373	0.000790612		-1.3928	0.00105299		-1.39163	0.00110778		-1.38686	0.000951384		-1.38914	0.000754697		-1.39339	0.000376867		-1.39065	0.00116606		-1.39343	0.000563792		-1.38953	0.00146454		-1.39589	0.000735164		-1.39085	0.00104797
-1.38693	0.00316082		-1.38881	0.00295188		-1.3837	0.00157112		-1.39148	0.0012469		-1.38148	0.00146405		-1.38592	0.000874601		-1.38874	0.00141341		-1.38351	0.000509942		-1.38218	0.00114874		-1.38477	0.000858537		-1.38964	0.000702824		-1.38502	0.00112148		-1.38968	0.000549766		-1.3836	0.000739242		-1.3887	0.000478634		-1.38554	0.000939672
-1.38256	0.00367845		-1.38475	0.00222527		-1.37964	0.00125488		-1.38366	0.00122229		-1.37804	0.00124536		-1.38123	0.00123713		-1.3828	0.000930527		-1.37788	0.000494861		-1.37874	0.000503043		-1.38039	0.000750875		-1.38464	0.000757186		-1.38158	0.00112553		-1.38499	0.000393783		-1.38015	0.0012396		-1.38058	0.000432436		-1.3821	0.000794001
-1.37599	0.00375971		-1.37788	0.002392		-1.37245	0.00168759		-1.37616	0.00110137		-1.37304	0.00133774		-1.37748	0.000986658		-1.37468	0.00116697		-1.37444	0		-1.37218	0.000655135		-1.37351	0.00063939		-1.37714	0.00117137		-1.37596	0.00132709		-1.3778	0.000273714		-1.37453	0.000749803		-1.37557	0.00173996		-1.37585	0.00100149
-1.36818	0.00347411		-1.37038	0.00164289		-1.36432	0.000970375		-1.3721	0.000692744		-1.36523	0.000869717		-1.37092	0.00102458		-1.36843	0.00143386		-1.36851	0.000496154		-1.36436	0.00107323		-1.36633	0.000776781		-1.37026	0.00128786		-1.36815	0.00150583		-1.37093	0.00148822		-1.36703	0.000818447		-1.37182	0.00179771		-1.36835	0.00106953
-1.36193	0.00387894		-1.36537	0.00173523		-1.35964	0.00130664		-1.36804	0.000941955		-1.35867	0.00107067		-1.36311	0.000918953		-1.36468	0.000831123		-1.361	0.000859167		-1.35905	0.00146901		-1.36102	0.000390302		-1.36558	0.00083463		-1.36221	0.0014107		-1.36593	0.00125807		-1.36047	0.000499094		-1.36557	0.00120891		-1.36241	0.000695769
-1.35756	0.00377346		-1.361	0.00252435		-1.35589	0.000725911		-1.36085	0.00121199		-1.35398	0.00179132		-1.3578	0.000781613		-1.35968	0.000234046		-1.35507	0.000372062		-1.35468	0.00128732		-1.35664	0.0005003		-1.36089	0.000718788		-1.35783	0.00112724		-1.36124	0.000917623		-1.35609	0.000386518		-1.35776	0.00144723		-1.35803	0.000744885
-1.35193	0.00291411		-1.35412	0.0025304		-1.34932	0.000912545		-1.35366	0.00116341		-1.34898	0.00148572		-1.35342	0.00117885		-1.35218	0.000807196		-1.35038	0.000744554		-1.34843	0.00145958		-1.35039	0.000692903		-1.35339	0.00102943		-1.35221	0.000751208		-1.35406	0.000580793		-1.35109	0.000664895		-1.35214	0.000989473		-1.3521	0.00123197
-1.34412	0.0028246		-1.34631	0.00280029		-1.34182	0.00056617		-1.34866	0.00101136		-1.34179	0.00136445		-1.34717	0.0011315		-1.34561	0.00132749		-1.34476	0.00126117		-1.34061	0.00167066		-1.34226	0.00109446		-1.34558	0.00113449		-1.34471	0.0010095		-1.34655	0.000837931		-1.34328	0.00113674		-1.34776	0.000979922		-1.34429	0.000942547
-1.33724	0.00323786		-1.34037	0.00236281		-1.3362	0.00108745		-1.34429	0.000903049		-1.33429	0.00107724		-1.33905	0.000927737		-1.34093	0.0011028		-1.33726	0.00102247		-1.33405	0.00136969		-1.33633	0.00135926		-1.34057	0.00139745		-1.33752	0.0011876		-1.34124	0.00178977		-1.33578	0.000931234		-1.34182	0.000644768		-1.33741	0.000715655
-1.33318	0.0031212		-1.33631	0.00119243		-1.33182	0.00145587		-1.33741	0.00100357		-1.32929	0.000979609		-1.3328	0.0013374		-1.33561	0.000871145		-1.33007	0.00148975		-1.32968	0.00178092		-1.33227	0.000404105		-1.33651	0.00124127		-1.33283	0.00138233		-1.33687	0.00117922		-1.33109	0.00142082		-1.33401	0.000217218		-1.33303	0.000573339
-1.32787	0.00399119		-1.33037	0.0016271		-1.32589	0.00128581		-1.32929	0.0008694		-1.3246	0.00117881		-1.32842	0.00072912		-1.32843	0.00125397		-1.32569	0.0016606		-1.32436	0.00168182		-1.32633	0.00058248		-1.32964	0.00106632		-1.32815	0.000803677		-1.33031	0.00116902		-1.32641	0.0015108		-1.32745	0.0012018		-1.32803	0.000649768
-1.31974	0.00376356		-1.32225	0.00270816		-1.31776	0.00169912		-1.32367	0.00163512		-1.31773	0.00146405		-1.32311	0.00101558		-1.32093	0.000534433		-1.32069	0.000887821		-1.31624	0.00164106		-1.3182	0.000625587		-1.32151	0.00111399		-1.32065	0.000486088		-1.32218	0.00129589		-1.31922	0.00103557		-1.32307	0.00157783		-1.32022	0.00129594
-1.31287	0.0036181		-1.316	0.00302152		-1.31151	0.00163785		-1.31929	0.00145636		-1.30992	0.000994932		-1.3153	0.00110129		-1.31593	0.00102232		-1.31319	0.000886528		-1.30936	0.00172922		-1.31164	0.000912261		-1.3162	0.000711237		-1.31315	0.000923119		-1.31656	0.00104577		-1.31141	0.00112787		-1.31776	0.000876644		-1.31304	0.000973214
-1.30912	0.00356894		-1.31163	0.00329616		-1.30714	0.000713779		-1.31335	0.000955415		-1.3046	0.00122719		-1.30842	0.000723121		-1.31155	0.000824598		-1.30569	0.00126398		-1.30499	0.00155911		-1.30789	0.000782303		-1.31183	0.00138062		-1.30814	0.00109055		-1.31249	0.000865983		-1.3064	0.000705448		-1.30995	0.000622557		-1.30834	0.000921463
-1.30443	0.0037786		-1.306	0.00229966		-1.30182	0.00105389		-1.30523	0.00150452		-1.30023	0.00101901		-1.30405	0.00137318		-1.30436	0.000716058		-1.30101	0.000740676		-1.29968	0.00145293		-1.30195	0.000532153		-1.30526	0.00116167		-1.30346	0.001316		-1.30593	0.00100433		-1.30203	0.000326956		-1.30276	0.00071251		-1.30366	0.000746802
-1.29693	0.0037997		-1.29787	0.00184855		-1.2937	0.00153675		-1.29898	0.00101072		-1.29335	0.00102098		-1.29873	0.00131297		-1.29655	0.000331275		-1.29632	0.00101945		-1.29186	0.00111978		-1.29382	0.00136415		-1.29714	0.000953925		-1.29627	0.00117011		-1.29781	0.00130121		-1.29484	0.000758673		-1.29839	0.000830891		-1.29585	0.000433897
-1.29006	0.00382794		-1.29131	0.0020049		-1.28682	0.00161015		-1.29491	0.00115079		-1.28523	0.000876503		-1.29092	0.000240183		-1.29124	0.000737592		-1.28882	0.00143266		-1.28499	0.0011556		-1.28726	0.00091035		-1.29183	0.00137976		-1.28846	0.00150967		-1.29218	0.00102813		-1.28672	0.000688974		-1.29339	0.000899077		-1.28835	1.3417e-05
-1.28537	0.00373733		-1.28787	0.00171793		-1.28245	0.00121868		-1.28897	0.000810725		-1.28023	0.000751945		-1.28373	0		-1.28686	0.000242094		-1.28101	0.00123338		-1.28093	0.00114681		-1.28352	0.00114415		-1.28839	0.00121668		-1.28377	0.000974736		-1.28843	0.000843882		-1.28203	0.000590337		-1.28557	0.000449983		-1.28429	0.000928411
-1.28068	0.00413152		-1.28287	0.00243006		-1.27745	0.00111354		-1.28085	0.000648159		-1.27648	0.000980265		-1.27998	0.000568212		-1.27999	0.000235568		-1.27663	0.00171101		-1.27624	0.00181546		-1.27851	0.00121996		-1.28214	0.00163949		-1.28002	0.000892192		-1.28281	0.00125913		-1.27828	0.00113526		-1.27839	0.000771145		-1.27991	0.00128995
-1.27349	0.0040398		-1.27506	0.002557		-1.26932	0.00134465		-1.2746	0.000500105		-1.27023	0.00103981		-1.2753	0.000521933		-1.27218	0.00133684		-1.27288	0.00120538		-1.26905	0.00123133		-1.27101	0.00103585		-1.27464	0.00146734		-1.27315	0.00100566		-1.27499	0.00140066		-1.27172	0.000963338		-1.27432	0.000827337		-1.27303	0.00127749
-1.26568	0.00303462		-1.2685	0.00181763		-1.26245	0.00081023		-1.27085	0.000360673		-1.26273	0.00121712		-1.26811	0.000933951		-1.26686	0.000619916		-1.26601	0.000812848		-1.26186	0.00141431		-1.26414	0.000934771		-1.2687	0.00134913		-1.26565	0.00121511		-1.26905	0.00112737		-1.26422	0.00123707		-1.26995	0.000752044		-1.26553	0.000680196
-1.26037	0.00274646		-1.26412	0.0023933		-1.25839	0.000995449		-1.26585	0.000325762		-1.25679	0.00114642		-1.26092	0.000812895		-1.26311	0		-1.25851	0.00113859		-1.25718	0.00130384		-1.25945	0.000977453		-1.26433	0.00126478		-1.26034	0.00114046		-1.26468	0.00110293		-1.25891	0.00113146		-1.26276	0.000729389		-1.26054	0.000464565
-1.25631	0.00307149		-1.25912	0.00247158		-1.2537	0.00100758		-1.25835	0.000919873		-1.25273	0.00074691		-1.25623	0.00038995		-1.25686	0.000956411		-1.25319	0.00109055		-1.25249	0.00181975		-1.25476	0.00133272		-1.25839	0.00108638		-1.25627	0.00104555		-1.25906	0.000453711		-1.25453	0.00113357		-1.25558	0.000778252		-1.25616	0.000435335
-1.24974	0.00419737		-1.25162	0.00326848		-1.24651	0.00126519		-1.25179	0.000900946		-1.24679	0.00112847		-1.25155	0.00100101		-1.24936	0.000786532		-1.24882	0.00126139		-1.24561	0.00197206		-1.24726	0.00076489		-1.25057	0.00137609		-1.24971	0.000944235		-1.25124	0.000977976		-1.24828	0.00115364		-1.25057	0.00110141		-1.24928	0.000997653
-1.24162	0.00382446		-1.24412	0.0021193		-1.23964	0.000935798		-1.24741	0.0015796		-1.23867	0.00108359		-1.24467	0.000874173		-1.24374	0.000551182		-1.24226	0.00116294		-1.23749	0.00214045		-1.23976	0.000634931		-1.2437	0.00105596		-1.2419	0.000839936		-1.24406	0.000701924		-1.24015	0.00101318		-1.2462	0.000775809		-1.24147	0.000972016
-1.23568	0.00386096		-1.23912	0.0023029		-1.23464	0.00139076		-1.2421	0.00125215		-1.23211	0.00115977		-1.23655	0.00113664		-1.23936	0.000652543		-1.23444	0.000801861		-1.23218	0.00157799		-1.23477	0.000702883		-1.23933	0.000933216		-1.23565	0.000972176		-1.23968	0.000811793		-1.23391	0.00100157		-1.23901	0.000654762		-1.23554	0.000886962
-1.23193	0.00389544		-1.23475	0.0032873		-1.22995	0.00158791		-1.2346	0.00117014		-1.22804	0.00071298		-1.23124	0.000777971		-1.23343	0.00045243		-1.2285	0.000502833		-1.22811	0.00184614		-1.23039	0.00083539		-1.23433	0.000447624		-1.23127	0.000561593		-1.23499	0.000792241		-1.22953	0.000824149		-1.2312	0.0010159		-1.23147	0.00128564
-1.22537	0.0042944		-1.22756	0.00373105		-1.22307	0.00149247		-1.2271	0.000872765		-1.22273	0.000791568		-1.22717	0.000972946		-1.22561	0.00125419		-1.22444	0.00130426		-1.22155	0.00137849		-1.22351	0.00113884		-1.22652	0.000952847		-1.22565	0.00102443		-1.22718	0.000644334		-1.2239	0.000444601		-1.22557	0.000989029		-1.22522	0.00105635
-1.21724	0.00331673		-1.21975	0.00326351		-1.21526	0.00139419		-1.22242	0.00202019		-1.21492	0.00111139		-1.22061	0.00141067		-1.21905	0.000927917		-1.21851	0.00116164		-1.21311	0.00114767		-1.21539	0.0014665		-1.21932	0.0015614		-1.21783	0.00050699		-1.21968	0.000889146		-1.21609	0.000614627		-1.22151	0.0011867		-1.2171	0.000627965
-1.21162	0.00359848		-1.21444	0.00272179		-1.20995	0.00117865		-1.21773	0.00143239		-1.20773	0.00044657		-1.2128	0.00061492		-1.21468	0.000843956		-1.21038	0.000918844		-1.20718	0.00176526		-1.21008	0.001059		-1.21464	0.00171866		-1.21096	0.000890699		-1.21499	0.00129271		-1.20922	0.00115702		-1.21526	0.0010008		-1.21116	0.000393646
-1.20787	0.00323052		-1.21038	0.00267984		-1.20589	0.00113274		-1.21054	0.00124963		-1.20335	0.000498013		-1.20686	0.000688197		-1.20936	0.00118132		-1.20413	0.00123942		-1.20343	0.00171271		-1.20602	0.000597344		-1.20995	0.0011347		-1.20689	0.00120466		-1.2103	0.0011397		-1.20484	0.00104529		-1.20714	0.000604345		-1.20709	0.000312425
-1.20224	0.00279268		-1.20319	0.00303103		-1.19932	0.00103367		-1.20273	0.000713354		-1.19836	0.00134803		-1.2028	0.000733405		-1.20155	0.000456346		-1.19976	0.000598272		-1.19718	0.000927143		-1.19914	0.000767863		-1.20214	0.00110083		-1.20127	0.00152353		-1.20249	0.000723388		-1.19953	0.000722979		-1.2012	0.000784915		-1.20085	0.000312186
-1.19474	0.00284312		-1.19538	0.00362574		-1.1912	0.000234354		-1.19773	0.000618086		-1.19054	0.00160393		-1.19655	0.000513362		-1.19436	0.000847654		-1.19413	0.000478273		-1.18874	0.000882953		-1.19102	0.000759581		-1.19464	0.0010167		-1.19315	0.00166942		-1.19499	0.000608844		-1.1914	0.00113062		-1.19713	0.00154162		-1.19272	0.000896546
-1.18849	0.00337579		-1.19006	0.00256327		-1.18526	0.000644625		-1.19366	0.00128854		-1.18336	0.00139247		-1.18842	0.000892385		-1.18999	0.000420456		-1.186	0.000496154		-1.18311	0.00128389		-1.18601	0.000902706		-1.19058	0.000774012		-1.18658	0.00120701		-1.19062	0.000474962		-1.18453	0.0013545		-1.19089	0.00158094		-1.18647	0.000810054
-1.18412	0.00354822		-1.18631	0.00265583		-1.1812	1.193e-05		-1.18648	0.000835331		-1.17929	0.00112102		-1.18248	0.000782899		-1.18499	0.00130683		-1.17944	0.000415796		-1.17968	0.00110541		-1.18227	0.000347407		-1.18651	0.0010441		-1.18284	0.00139876		-1.18655	0.000576118		-1.18078	0.000951932		-1.18245	0.000766481		-1.18304	0.000571662
-1.17881	0.00343229		-1.18006	0.0034097		-1.17495	0.000447072		-1.17835	0.000540904		-1.17492	0.00164027		-1.17905	0.000259895		-1.17718	0.00118132		-1.17569	0.00105845		-1.17405	0.00131799		-1.17602	0		-1.17933	0.000918978		-1.17815	0.00118205		-1.17968	0.000787779		-1.1764	0.0011266		-1.17651	0.000801795		-1.17772	0.0012013
-1.17131	0.00268611		-1.17256	0.0026913		-1.16682	0.000523101		-1.17366	0.000508938		-1.16773	0.00140757		-1.17342	0.00023397		-1.16968	0.000806326		-1.17101	0.000898808		-1.16624	0.00126651		-1.16851	0.000383931		-1.17214	0.00109673		-1.17065	0.000856573		-1.17218	0.00100964		-1.1689	0.000801338		-1.17307	0.000574361		-1.17022	0.000538598
-1.16412	0.00268519		-1.16662	0.00333336		-1.16089	0.000788999		-1.16991	0.000766561		-1.16054	0.00120421		-1.16561	0.000798754		-1.16561	0.000806544		-1.16351	0.000699312		-1.15999	0.000972836		-1.16289	0.000613483		-1.16683	0.00123717		-1.16346	0.00121255		-1.16687	0.000788416		-1.16172	0.000566259		-1.16745	0.00048663		-1.16366	0.000816762
-1.15943	0.00253221		-1.16225	0.00349382		-1.15745	0.000866038		-1.16335	0.000729968		-1.15554	0.00164421		-1.15936	0.00151738		-1.16124	0.00111802		-1.15663	0.000483659		-1.15561	0.00123626		-1.15852	0.00107641		-1.16245	0.000453449		-1.15877	0.00117267		-1.16249	0.00101134		-1.15703	0.000778316		-1.15995	0.000952826		-1.15898	0.000656476
-1.15443	0.00320888		-1.15662	0.00286019		-1.15182	0.00162127		-1.15585	0.0011613		-1.15117	0.00119195		-1.15498	0.000830678		-1.15405	0.000967505		-1.15194	0.00112717		-1.1503	0.000894108		-1.15258	0.000888903		-1.15558	0.00127816		-1.15408	0.00100865		-1.15593	0.00107679		-1.15234	0.00082774		-1.15339	0.000921065		-1.15397	0.00102161
-1.14693	0.00251882		-1.14881	0.0027778		-1.14432	0.000828024		-1.15023	0.00104353		-1.14429	0.000682114		-1.14967	0.000906954		-1.14718	0.00132858		-1.14694	0.00108516		-1.1428	0.00113158		-1.14477	0.00104328		-1.14776	0.00105661		-1.1469	0.00128017		-1.1478	0.00119793		-1.14515	0.00034681		-1.14901	0.000564144		-1.14647	0.000863961
-1.13943	0.00327124		-1.14194	0.00299989		-1.13776	0.000821554		-1.14585	0.00130179		-1.13617	0.000705537		-1.14217	0.00155444		-1.14218	0.000580764		-1.13976	0.000903332		-1.1353	0.00108846		-1.1382	0.00125033		-1.14183	0.00123674		-1.1394	0.000412076		-1.14187	0.00132076		-1.13765	0.000570484		-1.1437	0.00029562		-1.13897	0.000542432
-1.13474	0.00318925		-1.13787	0.00324123		-1.13339	0.00130543		-1.13992	0.00145258		-1.13054	0.000772741		-1.13498	0.000778399		-1.13749	0.000955976		-1.13226	0.0011345		-1.13061	0.00140852		-1.13383	0.00109064		-1.13776	0.00114247		-1.13409	0.000470305		-1.13781	0.00104598		-1.13203	0.000938626		-1.1362	0.000370247		-1.13397	0.00119412
-1.13006	0.00373641		-1.13256	0.00316836		-1.12807	0.00141259		-1.13179	0.00123975		-1.12648	0.00094918		-1.1303	0.000453798		-1.13061	0.000908558		-1.12725	0.00141543		-1.12593	0.00164277		-1.12852	0.000709041		-1.13151	0.000659464		-1.12971	0.00095234		-1.13187	0.00137728		-1.12796	0.0012641		-1.12901	0.000684524		-1.12959	0.000985194
-1.12256	0.00372853		-1.12444	0.00309829		-1.12057	0.00112587		-1.12523	0.000717139		-1.12023	0.000856145		-1.12561	0.000676412		-1.1228	0.000616001		-1.12288	0.000903117		-1.11843	0.00144306		-1.12071	0.0011244		-1.12339	0.000962123		-1.12315	0.000894112		-1.12375	0.00118432		-1.1214	0.00124826		-1.12432	0.000794244		-1.12241	0.00071901
-1.11506	0.00367772		-1.11725	0.00255873		-1.11339	0.00151673		-1.12116	0.00124921		-1.1121	0.00134737		-1.11811	0.000771757		-1.11718	0.00124723		-1.11601	0.000697373		-1.11093	0.00147159		-1.11352	0.00160028		-1.11714	0.00134934		-1.11502	0.000732651		-1.11718	0.000391658		-1.11328	0.000603433		-1.11963	0.000847327		-1.11459	0.000858211
-1.11037	0.00350566		-1.11288	0.00335261		-1.1087	0.00127631		-1.11585	0.00131483		-1.10617	0.0016302		-1.11061	0.000985587		-1.11311	0.00113891		-1.10788	0.000753387		-1.10593	0.00143812		-1.10914	0.000622827		-1.11308	0.00144211		-1.1094	0.00107328		-1.11312	0.000720838		-1.10734	0.00147405		-1.11214	0.000654318		-1.10928	0.000982558
-1.10662	0.00301371		-1.10787	0.00327821		-1.10401	0.000680011		-1.10773	0.000641219		-1.1021	0.00131891		-1.10561	0.00160158		-1.10686	0.000923567		-1.10257	0.00140789		-1.10155	0.00158421		-1.10446	0.000863845		-1.10714	0.000951984		-1.10533	0.00147063		-1.10749	0.00062542		-1.10328	0.000811265		-1.10432	0.0010279		-1.10491	0.0010185
-1.09974	0.00294896		-1.10006	0.00285176		-1.09651	0.000463653		-1.10085	0.000584647		-1.09617	0.00107002		-1.10124	0.00152659		-1.09874	0.000802628		-1.09851	0.000722149		-1.09405	0.00157992		-1.09664	0.00095367		-1.09901	0.000818236		-1.09877	0.00112873		-1.09937	0.000316854		-1.09703	0.000764799		-1.09963	0.00127599		-1.09803	0.000645695
-1.09256	0.0031887		-1.09256	0.0031876		-1.08901	0.000889696		-1.09648	0.00100442		-1.08773	0.00116677		-1.09374	0.00137082		-1.09249	0.000970767		-1.09163	0.000544412		-1.08624	0.00198128		-1.08914	0.000403255		-1.09276	0.000879717		-1.09033	0.00106325		-1.0928	0.000416097		-1.08859	0.000348711		-1.09526	0.000845772		-1.08991	0.000482534
-1.08724	0.0033868		-1.08881	0.00246834		-1.08401	0.00124557		-1.09148	0.00091062		-1.08148	0.000683865		-1.08592	0.00105865		-1.08843	0.000840258		-1.0835	0.000992739		-1.08186	0.00155096		-1.08476	0.000578445		-1.08901	0.00102749		-1.08471	0.00099969		-1.08905	0.00123915		-1.08297	0.000198328		-1.08776	0.000326715		-1.08491	0.000766209
-1.08256	0.00366194		-1.08444	0.0023455		-1.07964	0.00106096		-1.08335	0.000454048		-1.07804	0.000858772		-1.08123	0.00105993		-1.08249	0.000856572		-1.07819	0.000498739		-1.0778	0.00158807		-1.0807	0.000795893		-1.08401	0.000673917		-1.08128	0.000809436		-1.08406	0.001403		-1.07953	0.000308792		-1.07995	0.0010701		-1.08116	0.000680915
-1.07631	0.00387563		-1.07725	0.00211325		-1.07214	0.00158285		-1.07616	0.000527445		-1.07273	0.00096122		-1.07748	0.000791255		-1.07405	0.00102145		-1.07476	0.000123446		-1.07124	0.00159365		-1.07352	0.000971083		-1.07651	0.000411814		-1.07533	0.000927172		-1.07656	0.000897434		-1.0739	0.00043214		-1.07526	0.00143035		-1.07491	0.000941349
-1.06849	0.00394735		-1.07006	0.00217488		-1.06432	0.00190981		-1.07241	0.000332702		-1.06523	0.000852424		-1.07092	0.000972303		-1.0678	0.000696264		-1.0685	0.000339746		-1.06374	0.00161574		-1.06633	0.00141362		-1.06995	0.000832258		-1.06783	0.000939116		-1.06968	0.00104747		-1.06609	0.00073016		-1.0712	0.00116005		-1.06741	0.000780105
-1.06224	0.00272976		-1.06506	0.00301438		-1.05964	0.00142452		-1.06804	0.00114974		-1.05867	0.000762015		-1.06342	0.00117842		-1.06436	0.000447862		-1.061	0.00123985		-1.05843	0.00174874		-1.06101	0.00131955		-1.06526	0.000963848		-1.0619	0.00105259		-1.06499	0.00179827		-1.06015	0.000725302		-1.06463	0.0010932		-1.06147	0.000804783
-1.05787	0.00242656		-1.06069	0.00346268		-1.05589	0.00102901		-1.06054	0.00155626		-1.05398	0.000653656		-1.05811	0.00106315		-1.05905	0.000995129		-1.05507	0.00117952		-1.05405	0.00181954		-1.05664	0.00129619		-1.06026	0.000686645		-1.05753	0.00123111		-1.06031	0.00134073		-1.05578	0.000822248		-1.05713	0.000880198		-1.05741	0.000705832
-1.05224	0.00328115		-1.05381	0.00312056		-1.04932	0.00102416		-1.05367	0.00147466		-1.04898	0.000887887		-1.05373	0.000253467		-1.05155	0.00138187		-1.05069	0.00114678		-1.0478	0.00170992		-1.05008	0.00109637		-1.05276	0.000951552		-1.05189	0.000734997		-1.05312	0.000648797		-1.05015	0.000748535		-1.05151	0.000228545		-1.05147	0.00056663
-1.04412	0.00330609		-1.04569	0.0033206		-1.04182	0.000925486		-1.04866	0.000946161		-1.04148	0.00072699		-1.04749	0.000952377		-1.0453	0.00141515		-1.04475	0.000755972		-1.03968	0.00131842		-1.04196	0.000584179		-1.04526	0.00115304		-1.04408	0.000547089		-1.04531	0.000661122		-1.04265	0.00107591		-1.04714	0.000486408		-1.04334	0.000453544
-1.03756	0.00348603		-1.04006	0.00369515		-1.03651	0.00110363		-1.04398	0.000819137		-1.03398	0.000631765		-1.03936	0.00121591		-1.04061	0.000397182		-1.03694	0.000833961		-1.03343	0.00136841		-1.03632	0.00114733		-1.04026	0.000995775		-1.03721	0.000757606		-1.04031	0.000701499		-1.03547	0.00120708		-1.0412	0.000378021		-1.03678	0.000733145
-1.03318	0.00317421		-1.036	0.00261431		-1.03214	0.000884034		-1.0371	0.0015062		-1.02929	0.000375425		-1.03311	0.000492579		-1.03561	0.000691696		-1.03007	0.000814356		-1.02905	0.00131456		-1.03227	0.00112631		-1.03557	0.000993402		-1.03284	0.00114046		-1.03593	0.000721263		-1.03078	0.000725302		-1.03307	0.000690743		-1.03272	0.000886483
-1.02756	0.00284661		-1.02975	0.00349014		-1.02557	0.000737639		-1.02929	0.00110873		-1.02461	0.000709259		-1.02873	0.00126884		-1.02811	0.00141102		-1.02569	0.00143848		-1.02343	0.00173866		-1.02602	0.0010401		-1.0287	0.00125831		-1.02783	0.00148812		-1.02906	0.000471775		-1.02578	0.000780851		-1.02682	0.0011214		-1.02741	0.000655518
-1.01974	0.00349796		-1.02162	0.00300681		-1.01776	0.00080194		-1.02366	0.000516929		-1.01742	0		-1.02311	0.00151652		-1.02061	0.000820247		-1.02069	0.00117306		-1.01561	0.00143619		-1.01789	0.00161345		-1.02089	0.000561957		-1.02002	0.00114046		-1.02093	0.000622658		-1.01828	0.000509021		-1.02245	0.000882863		-1.01928	0.000967464
-1.01318	0.00320337		-1.01569	0.00276569		-1.01151	0.00127631		-1.0196	0.000468349		-1.0096	0.000421615		-1.0153	0.000738119		-1.01593	0.000816332		-1.01288	0.000377232		-1.00874	0.00168525		-1.01164	0.000784426		-1.01558	0.000439211		-1.01252	0.000537491		-1.01562	0.000750164		-1.01078	0.000924264		-1.01682	0.000360475		-1.01209	0.00076573
-1.00943	0.00317604		-1.01163	0.00291317		-1.00714	0.0013301		-1.01304	0.000658675		-1.0046	0.000880225		-1.00842	0.000667414		-1.01124	0.0009749		-1.00569	0.000367322		-1.00468	0.0019875		-1.00758	0.000752998		-1.0112	0.00108357		-1.00783	0.000904776		-1.01155	0.000707662		-1.00578	0.00127572		-1.00901	0.000874867		-1.00772	0.000921223
-1.00443	0.00313826		-1.00537	0.003169		-1.00151	0.000869678		-1.00523	0.000744479		-1.00023	0.000838632		-1.00436	0.000822965		-1.00405	0.000143777		-1.00101	0.000751448		-0.999052	0.0012457		-1.00164	0.000491593		-1.00432	0.0014132		-1.00346	0.00105579		-1.00468	0.00109996		-1.0014	0.00080155		-1.00213	0.000822895		-1.00273	0.00102281
-0.997245	0.0032274		-0.997248	0.00299557		-0.993699	0.00131776		-0.99929	0.000811777		-0.993042	0.000297276		-0.998734	0.0012352		-0.996239	0.000841128		-0.996319	0.00106814		-0.990926	0.0013624		-0.993516	0.00117452		-0.996199	0.0018015		-0.995643	0.00102209		-0.996555	0.00120451		-0.993901	0.000884767		-0.997763	0.000479967		-0.994913	0.000837846
-0.99037	0.0033536		-0.991	0.00201096		-0.986824	0.00126782		-0.995228	0.000749737		-0.98523	0.000919409		-0.990609	0.000938879		-0.990925	0.00112847		-0.988506	0.000942757		-0.984365	0.00204456		-0.987268	0.00101929		-0.991202	0.00140069		-0.987831	0.000633898		-0.991242	0.00091146		-0.986088	0.000816334		-0.992449	0.00081179		-0.987726	0.000395563
-0.985682	0.0036403		-0.987563	0.00142015		-0.982761	0.00123546		-0.988976	0.000953101		-0.980231	0.00140823		-0.984048	0.000749475		-0.986552	0.000697134		-0.981007	0.000849904		-0.980613	0.00219987		-0.983514	0.00129471		-0.987765	0.000887698		-0.983459	0.00051019		-0.987804	0.00103599		-0.981717	0.000856254		-0.984324	0.000154362		-0.983659	0.000949495
-0.980682	0.0034244		-0.982249	0.0015233		-0.977448	0.00136892		-0.980537	0.00120652		-0.976792	0.000782373		-0.980298	0.000965447		-0.979363	0.00147018		-0.976944	0.000828144		-0.975927	0.00164084		-0.978517	0.00130065		-0.9812	0.000838514		-0.979713	0.00117395		-0.981556	0.00075399		-0.977658	0.000368776		-0.977137	0.000249423		-0.979288	0.0006893
-0.973495	0.00346311		-0.974437	0.00164765		-0.969324	0.00143322		-0.974602	0.00101724		-0.970231	0.00141042		-0.97561	0.000868388		-0.971238	0.000781965		-0.972881	0.00101751		-0.968427	0.0010329		-0.970704	0.00081097		-0.9737	0.00129045		-0.972831	0.000874703		-0.974056	0.000573993		-0.971089	0.000326745		-0.973387	0.00058591		-0.972101	0.000205808
-0.965995	0.00289943		-0.967875	0.00238184		-0.962136	0.000915174		-0.971165	0.000601262		-0.962418	0.00146252		-0.96811	0.000928594		-0.966551	0.00104798		-0.965695	0.000684016		-0.961238	0.00171206		-0.964143	0.000441903		-0.968077	0.00161058		-0.965331	0.000319295		-0.968117	0.00086917		-0.963589	0.000355892		-0.968699	0.00070629		-0.964906	0.00084719
-0.960682	0.00260412		-0.9635	0.00285068		-0.958386	0.00107815		-0.965538	0.000947844		-0.956793	0.000731368		-0.961236	0.000585567		-0.963114	0.000917476		-0.958504	0.000823835		-0.956865	0.00110369		-0.959764	0.000785488		-0.963702	0.000915095		-0.960021	0.00122386		-0.963432	0.00101389		-0.958279	8.27952e-05		-0.961199	0.000800907		-0.959909	0.00158177
-0.956307	0.00398899		-0.958186	0.00358616		-0.95401	0.00108098		-0.958038	0.00113081		-0.952418	0.00109629		-0.956548	0.000937807		-0.956551	0.000924654		-0.953194	0.000584268		-0.952177	0.00148424		-0.954766	0.000752573		-0.957762	0.00102468		-0.95565	0.00207083		-0.957806	0.00106277		-0.953908	0.000540914		-0.954325	0.00100746		-0.955537	0.000841919
-0.949744	0.00446462		-0.950686	0.00296594		-0.946511	0.000585986		-0.951477	0.0011327		-0.94648	0.00121712		-0.951859	0.00100466		-0.948739	0.00103667		-0.948818	0.00069802		-0.94499	0.00212115		-0.946954	0.000361847		-0.949637	0.000976792		-0.949394	0.00122855		-0.949993	0.00119112		-0.947339	0.000769234		-0.949637	0.000411114		-0.948663	0.00101634
-0.941619	0.0036878		-0.943499	0.00284224		-0.939324	0.00116672		-0.947102	0.000956676		-0.938668	0.000904524		-0.944672	0.00069591		-0.943427	0.000996869		-0.942257	0.000653855		-0.937177	0.00174531		-0.939454	0.000972357		-0.943076	0.00106394		-0.941268	0.000964924		-0.943119	0.000976489		-0.939526	0.000787187		-0.944948	0.000736719		-0.940538	0.000686665
-0.935994	0.00249131		-0.938811	0.00274385		-0.934636	0.00166313		-0.941788	0.000950998		-0.932105	0.001313		-0.93686	0.000606993		-0.939051	0.000839606		-0.934445	0.000716978		-0.931863	0.00169855		-0.934762	0.00046059		-0.9387	0.00111787		-0.935333	0.000920133		-0.938744	0.000751439		-0.933278	0.000940527		-0.937761	0.00101679		-0.934907	6.61268e-05
-0.931932	0.0033525		-0.934123	0.00278039		-0.929948	0.00149348		-0.934288	0.000981913		-0.928042	0.00128148		-0.931546	0.000691625		-0.932801	0.000701267		-0.928505	0.000790658		-0.92749	0.00207803		-0.93039	0.000799078		-0.93339	0.00099254		-0.931274	0.00108735		-0.933743	0.00107127		-0.929219	0.00106071		-0.929949	0.000434435		-0.930849	0.00135296
-0.925057	0.00394607		-0.926936	0.00194608		-0.92276	0.00118532		-0.927101	0.00047613		-0.92273	0.000962315		-0.927171	0.00121013		-0.924988	0.000236003		-0.924442	0.00112911		-0.920927	0.00209648		-0.923204	0.00129301		-0.925578	0.000172578		-0.925331	0.000661412		-0.92593	0.00109018		-0.923588	0.00128142		-0.924635	0.000127043		-0.9246	0.000924338
-0.916932	0.00348145		-0.919123	0.00216493		-0.915261	0.00140815		-0.922413	0.000821871		-0.914605	0.00089117		-0.920609	0.000925166		-0.918738	0.00018989		-0.918194	0.00134541		-0.912801	0.0014171		-0.915391	0.00169435		-0.918387	0.000194797		-0.917213	0.000851454		-0.91843	0.000575693		-0.915463	0.000307525		-0.920572	0.00103567		-0.916475	0.00135081
-0.911619	0.0024328		-0.913813	0.00226246		-0.909949	0.000869274		-0.917728	0.00123386		-0.907731	0.00060681		-0.912484	0.000856603		-0.914365	0.000251447		-0.910069	0.0012364		-0.907176	0.00113029		-0.910394	0.00124735		-0.914015	0.000999227		-0.910644	0.00115497		-0.913742	0.000975213		-0.908589	0.000313439		-0.913698	0.000769146		-0.910531	0.00124251
-0.908182	0.00248122		-0.909751	0.00254576		-0.905573	0.000908299		-0.910225	0.000589274		-0.903355	0.00092729		-0.906861	0.000866459		-0.908738	0.000500936		-0.903816	0.000796044		-0.903114	0.00145636		-0.906327	0.00102332		-0.909014	0.00141126		-0.906585	0.000718787		-0.909054	0.00102027		-0.90453	0.000746423		-0.905573	0.000551706		-0.906473	0.000634913
-0.902245	0.00318393		-0.902564	0.00229944		-0.899011	0.00124456		-0.902412	0.000774763		-0.898354	0.000517277		-0.902798	0.000995014		-0.900925	0.000838083		-0.899758	0.000968825		-0.896553	0.0019195		-0.89914	0.000925003		-0.901202	0.00129434		-0.900962	0.00158411		-0.901241	0.000325567		-0.89922	0.00116103		-0.89995	0.000932392		-0.900224	0.00163305
-0.894432	0.0026309		-0.894439	0.00158666		-0.890886	0.00097725		-0.897728	0.000833228		-0.890231	0.000585357		-0.896233	0.00072912		-0.894051	0.000617089		-0.893818	0.00115324		-0.888427	0.00152372		-0.891015	0.000744929		-0.894015	0.000958671		-0.892837	0.00163295		-0.893742	0.000208261		-0.890782	0.000330547		-0.895888	0.000505064		-0.892099	0.000757823
-0.888495	0.00270317		-0.88975	0.00146708		-0.885261	0.00106723		-0.893353	0.00102082		-0.883355	0.00106717		-0.888108	0.000648131		-0.889676	0.0010469		-0.885693	0.00143676		-0.882802	0.00111206		-0.886018	0.000365244		-0.889952	0.0014613		-0.886268	0.00139598		-0.889679	0.000750802		-0.884213	0.000229376		-0.889322	0.00136372		-0.88585	0.000618142
-0.884119	0.00285945		-0.886	0.00149281		-0.881198	0.0010551		-0.885853	0.0008		-0.879292	0.00146952		-0.882798	0.00107836		-0.884677	0.000705399		-0.879444	0.001563		-0.879051	0.00145271		-0.882264	0.000752361		-0.885577	0.00125658		-0.882522	0.000701298		-0.885307	0.000401859		-0.880467	0.00136654		-0.881197	0.001467		-0.88241	0.00092338
-0.878494	0.0027958		-0.879435	0.00129472		-0.874636	0.00179759		-0.87804	0.00143449		-0.874606	0.000600024		-0.879048	0.000925809		-0.876551	0.000830035		-0.875694	0.00115303		-0.873426	0.00165243		-0.876016	0.000614545		-0.87839	0.00100742		-0.877525	0.00153014		-0.878429	0.000492601		-0.875783	0.000910746		-0.875574	0.000935058		-0.876787	0.000744885
-0.870995	0.00342991		-0.871623	0.00179665		-0.866511	0.000543119		-0.873352	0.00105068		-0.867417	0.00101792		-0.873421	0.00121056		-0.869364	0.000696699		-0.870693	0.00138893		-0.865613	0.00165693		-0.868516	0.000510917		-0.871199	0.000984342		-0.870025	0.000969403		-0.87093	0.00113438		-0.868283	0.000815701		-0.871824	0.000644768		-0.869287	0.00171043
-0.863807	0.0038683		-0.866313	0.00152763		-0.860886	0.000621978		-0.869602	0.00101346		-0.860543	0.000848483		-0.865609	0.00111586		-0.865615	0.000879846		-0.863194	0.00107762		-0.859676	0.00164985		-0.86258	0.000736435		-0.866202	0.000879501		-0.863143	0.000793439		-0.86562	0.00116902		-0.861401	0.000835766		-0.866198	0.000861541		-0.863031	0.00188078
-0.859432	0.00309057		-0.861937	0.00186001		-0.857448	0.000616923		-0.862728	0.00088307		-0.855542	0.00108271		-0.859361	0.000815895		-0.860926	0.000660374		-0.85632	0.000790658		-0.855302	0.00161102		-0.858514	0.000841761		-0.861827	0.00136854		-0.858772	0.000555194		-0.861244	0.00103705		-0.856717	0.000546405		-0.858385	0.000829558		-0.858346	0.00114644
-0.854432	0.00325382		-0.855998	0.00165543		-0.851511	0.000825395		-0.855537	0.000527865		-0.850855	0.00143231		-0.854985	0.00100208		-0.853739	0.0015487		-0.851944	0.00110498		-0.849678	0.00151192		-0.852265	0.00091396		-0.854952	0.000730221		-0.853774	0.000456227		-0.854679	0.000671748		-0.852032	0.000887724		-0.85245	0.000435102		-0.853349	0.000820835
-0.84662	0.00282331		-0.847876	0.00144826		-0.843698	0.000485289		-0.849915	0.000939432		-0.843979	0.00114839		-0.849671	0.00130012		-0.846551	0.00174403		-0.846943	0.00120473		-0.841865	0.00158442		-0.844453	0.000957917		-0.846827	0.000667446		-0.846275	0.000958312		-0.846867	0.000474537		-0.844845	0.000476917		-0.848074	0.000462642		-0.845537	0.00142005
-0.839119	0.00356564		-0.841311	0.00199885		-0.837761	0.000392882		-0.845539	0.000885594		-0.835854	0.00186925		-0.841859	0.00144367		-0.841864	0.00128725		-0.839443	0.000963439		-0.834989	0.00104963		-0.837892	0.00104073		-0.8412	0.000514067		-0.838775	0.00126268		-0.840931	0.000622233		-0.837033	0.000484098		-0.842447	0.000436434		-0.83835	0.00142604
-0.834745	0.00395029		-0.837249	0.00200534		-0.833386	0.000603376		-0.839603	0.000742166		-0.830542	0.00138853		-0.834672	0.000894099		-0.837176	0.000919651		-0.831944	0.000492492		-0.830301	0.00120258		-0.833512	0.0015835		-0.837138	0.00111097		-0.83377	0.000938903		-0.836868	0.000924423		-0.831715	0.000744945		-0.834948	0.000886417		-0.833658	0.00173511
-0.830057	0.00279983		-0.831939	0.00186499		-0.827761	0.000486906		-0.831478	0.00116446		-0.826479	0.000893578		-0.830296	0.000894313		-0.830302	0.00121808		-0.826943	0.000872309		-0.825614	0.00141388		-0.828202	0.00106409		-0.830889	0.00140888		-0.829399	0.00120743		-0.83062	0.000942274		-0.827344	0.000665529		-0.827761	0.00115516		-0.828973	0.00145048
-0.822245	0.00257055		-0.823813	0.00123525		-0.819949	0.00127247		-0.825226	0.00161809		-0.819918	0.00071692		-0.825295	0.000750546		-0.822489	0.00102536		-0.822254	0.00113557		-0.817802	0.00180173		-0.82039	0.000990195		-0.822764	0.000544699		-0.822524	0.00186437		-0.822495	0.000630095		-0.820782	0.00063089		-0.823073	0.0011736		-0.821474	0.000864201
-0.815057	0.00316962		-0.816935	0.00236454		-0.812761	0.00131291		-0.82085	0.000867297		-0.811793	0.00110242		-0.817483	0.00107665		-0.816863	0.00030365		-0.81538	0.000780532		-0.810302	0.00156297		-0.813516	0.00122654		-0.816512	0.000551818		-0.814399	0.00085316		-0.816242	0.00114586		-0.812657	0.000700802		-0.818384	0.00106543		-0.813661	0.00122502
-0.810682	0.00321988		-0.812564	0.0020395		-0.808386	0.00108341		-0.81554	0.000764248		-0.805855	0.00089511		-0.810296	0.000392521		-0.812802	0.00044547		-0.807568	0.00137665		-0.805614	0.00146708		-0.809137	0.00065744		-0.812453	0.000635519		-0.809081	0.000997771		-0.81218	0.000460087		-0.807027	0.000853297		-0.810885	0.000874201		-0.808656	0.00148833
-0.80662	0.00293337		-0.807563	0.00173393		-0.803698	0.00108401		-0.807415	0.00106267		-0.802105	0.000782592		-0.805608	0.000985587		-0.806239	0.000906601		-0.802254	0.00132042		-0.801238	0.00183605		-0.803826	0.00059692		-0.806201	0.00102835		-0.805023	0.0013241		-0.806244	0.000113906		-0.802968	0.000711784		-0.803385	0.00074005		-0.804285	0.000869712
-0.799432	0.00256046		-0.799437	0.00215909		-0.795886	0.00108846		-0.800541	0.000989274		-0.795542	0.00142968		-0.800923	0.00131876		-0.798114	0.00110715		-0.798195	0.000773854		-0.793426	0.00201732		-0.796014	0.000844097		-0.798075	0.00100742		-0.798149	0.000946155		-0.798119	0.000144083		-0.796406	0.000135176		-0.798697	0.00046553		-0.797098	0.000110691
-0.792244	0.00252469		-0.79225	0.00210762		-0.788386	0.000617126		-0.796478	0.00118738		-0.787104	0.000848702		-0.793423	0.0007739		-0.792176	0.00138818		-0.791004	0.000901609		-0.785926	0.00165243		-0.788827	0.000883594		-0.79214	0.00133144		-0.790023	0.000373258		-0.791866	0.00038337		-0.788281	0.000389897		-0.794012	0.00070096		-0.789285	0.000282477
-0.787245	0.00298748		-0.788188	0.00210438		-0.783699	0.00115337		-0.790852	0.000914826		-0.781479	0.00094524		-0.785924	0.000942093		-0.788426	0.000952496		-0.783192	0.000601288		-0.781551	0.00115989		-0.784768	0.000554874		-0.788703	0.00119769		-0.784706	0.00176604		-0.788117	0.00091401		-0.782651	0.000332448		-0.786513	0.00142457		-0.784288	0.00103838
-0.782557	0.00351758		-0.783812	0.00239308		-0.779323	0.00123648		-0.782726	0.0010082		-0.778042	0.00114663		-0.781548	0.00118635		-0.781863	0.000835908		-0.777882	0.000613783		-0.777488	0.00101896		-0.780389	0.00109552		-0.783076	0.000840239		-0.781272	0.00123004		-0.783119	0.000968626		-0.778905	0.000605545		-0.7787	0.0017202		-0.780534	0.00122047
-0.775994	0.0027272		-0.776625	0.00291858		-0.771823	0.001101		-0.775852	0.000760673		-0.772418	0.000655407		-0.777486	0.00100316		-0.77374	0.0012792		-0.774445	0.000881788		-0.770614	0.000841766		-0.773202	0.00135523		-0.775576	0.000703687		-0.775024	0.00163999		-0.77562	0.000872571		-0.773282	0.00139231		-0.774325	0.00125444		-0.773973	0.00105084
-0.768182	0.0025766		-0.769439	0.00247158		-0.764011	0.00108179		-0.772102	0.000789695		-0.764605	0.00133862		-0.770608	0.00120263		-0.767802	0.00097751		-0.768192	0.00129909		-0.763114	0.00106787		-0.766015	0.00125372		-0.769015	0.000887051		-0.767524	0.00114686		-0.769054	0.000751014		-0.765469	0.00154882		-0.770575	0.00110452		-0.766473	0.000684509
-0.762244	0.00285633		-0.76475	0.00239611		-0.759636	0.000876351		-0.767414	0.000369926		-0.758355	0.00157679		-0.763421	0.00206973		-0.764363	0.00103124		-0.76038	0.000769545		-0.758113	0.00128002		-0.761018	0.00113417		-0.764639	0.00114333		-0.761581	0.00149623		-0.76437	0.000582918		-0.759526	0.0011152		-0.763697	0.000677639		-0.761163	0.000530692
-0.758182	0.00288586		-0.760062	0.00263767		-0.755886	0.00144636		-0.760227	0.000704311		-0.753979	0.00138393		-0.758111	0.00136354		-0.758738	0.00107648		-0.754757	0.000923152		-0.75374	0.00135661		-0.756639	0.000899945		-0.759326	0.00144038		-0.757209	0.00173277		-0.759056	0.000997102		-0.755467	0.000715586		-0.756197	0.00164068		-0.756784	0.00143682
-0.752244	0.00335488		-0.753188	0.00240065		-0.749011	0.00159518		-0.753353	0.00120799		-0.748667	0.00110898		-0.753735	0.00197824		-0.750926	0.00102667		-0.750382	0.00124631		-0.747177	0.00203791		-0.749765	0.0012448		-0.751826	0.00132842		-0.751274	0.00145954		-0.751869	0.00113247		-0.749531	0.000984037		-0.750887	0.000971483		-0.750535	0.0011014
-0.74412	0.00231247		-0.745375	0.00275877		-0.741511	0.001964		-0.748665	0.00135415		-0.741168	0.000573536		-0.74717	0.00151523		-0.744675	0.00119502		-0.744442	0.00136437		-0.739364	0.00242104		-0.741952	0.000995078		-0.744326	0.00141363		-0.743461	0.0012904		-0.74437	0.000537653		-0.741719	0.00115322		-0.746512	0.00144012		-0.74241	0.000416887
-0.737557	0.0022235		-0.739749	0.00228776		-0.736199	0.00120433		-0.743977	0.000943638		-0.733981	0.00113197		-0.739358	0.00101473		-0.740302	0.00157916		-0.73663	0.00163367		-0.733114	0.00124098		-0.736329	0.00119894		-0.739638	0.00101648		-0.7369	0.00117693		-0.739368	0.00102983		-0.734845	0.00115153		-0.73995	0.00169865		-0.736162	0.00140016
-0.733495	0.00287962		-0.735686	0.00284159		-0.731823	0.00110727		-0.73679	0.000933753		-0.729292	0.00137036		-0.733109	0.00083882		-0.734988	0.00165376		-0.730068	0.00133529		-0.729051	0.00196391		-0.732263	0.00144463		-0.735263	0.00149129		-0.732521	0.00154721		-0.734993	0.00154474		-0.730466	0.000999033		-0.732138	0.00131352		-0.732095	0.00146845
-0.727869	0.00331086		-0.729125	0.00295556		-0.725261	0.000437771		-0.728977	0.00167865		-0.724604	0.00183772		-0.729047	0.000756331		-0.727488	0.0017647		-0.725693	0.00163733		-0.723113	0.00172579		-0.725701	0.00121805		-0.727763	0.00138472		-0.72721	0.00115561		-0.727806	0.00101878		-0.725468	0.00108964		-0.725886	0.00103434		-0.726472	0.00142748
-0.719745	0.00289485		-0.720999	0.00250251		-0.717449	0.000951166		-0.723976	0.00162902		-0.717104	0.00239353		-0.723111	0.00139632		-0.720301	0.00113782		-0.720379	0.00135037		-0.714988	0.00223076		-0.717889	0.00104732		-0.71995	0.00106783		-0.719398	0.00121447		-0.719994	0.00103769		-0.717969	0.0015372		-0.721823	0.00147632		-0.718347	0.00171235
-0.713182	0.0032617		-0.715373	0.00203345		-0.711198	0.00135193		-0.719601	0.00124374		-0.709605	0.00247606		-0.714986	0.00122406		-0.715613	0.00102232		-0.712566	0.00157722		-0.70874	0.00241911		-0.711953	0.00159497		-0.714949	0.00179438		-0.712211	0.00133093		-0.71468	0.00155048		-0.710469	0.00105796		-0.715887	0.00150609		-0.711473	0.00181633
-0.709745	0.00324208		-0.711001	0.00220169		-0.707136	0.00165605		-0.712727	0.00196614		-0.704606	0.00203036		-0.708421	0.00134297		-0.710927	0.00125745		-0.705692	0.00159101		-0.704364	0.00296892		-0.707887	0.00162152		-0.710578	0.00193805		-0.707832	0.00133413		-0.710304	0.00142892		-0.705777	0.000790567		-0.707762	0.00154451		-0.707094	0.00134458
-0.704432	0.00280552		-0.704749	0.00179103		-0.701511	0.00225012		-0.704601	0.00173964		-0.70023	0.00185567		-0.704358	0.00172199		-0.703427	0.00174033		-0.701317	0.00217291		-0.698739	0.0026199		-0.701638	0.00179734		-0.703387	0.00156679		-0.703147	0.00165044		-0.70343	0.00138217		-0.701092	0.00149813		-0.70151	0.00180526		-0.702096	0.00146198
-0.696932	0.00265878		-0.696624	0.00206459		-0.693386	0.00195834		-0.698978	0.00190746		-0.69273	0.00227619		-0.698735	0.00168792		-0.695925	0.00226607		-0.69632	0.00277958		-0.690614	0.00287753		-0.6932	0.00128961		-0.695265	0.00192425		-0.695335	0.00238906		-0.695618	0.00199697		-0.693593	0.0013205		-0.697134	0.00220038		-0.693971	0.00187767
-0.69037	0.00253111		-0.690688	0.00288182		-0.686823	0.00220645		-0.694916	0.0026042		-0.685231	0.00278866		-0.69061	0.00180427		-0.690926	0.00281573		-0.688507	0.00242907		-0.684051	0.00308712		-0.687265	0.00271789		-0.690577	0.00189879		-0.687835	0.00242873		-0.690304	0.00187329		-0.68578	0.00129008		-0.691511	0.00181237		-0.686784	0.00206503
-0.685682	0.00360655		-0.686938	0.00287447		-0.682761	0.00200849		-0.688351	0.00273817		-0.680542	0.0026282		-0.684048	0.00211087		-0.686551	0.00224257		-0.681008	0.00241442		-0.680301	0.00283055		-0.683831	0.00247241		-0.686827	0.00213242		-0.683769	0.00203692		-0.686554	0.00139939		-0.681401	0.00145419		-0.683386	0.00215441		-0.683038	0.00298026
-0.680682	0.00357151		-0.681311	0.00337358		-0.677136	0.00195187		-0.680225	0.00246603		-0.67648	0.00258485		-0.680608	0.00251453		-0.679051	0.00196198		-0.677254	0.00277937		-0.675302	0.00290521		-0.678514	0.00253208		-0.680262	0.00227005		-0.679397	0.00243001		-0.680306	0.0017496		-0.677342	0.00134141		-0.676825	0.00183413		-0.678659	0.00330155
-0.673494	0.00339597		-0.673812	0.0039579		-0.669011	0.00221474		-0.674603	0.00277287		-0.669917	0.00318137		-0.67561	0.00291091		-0.671239	0.00289882		-0.672882	0.00218842		-0.667802	0.00279966		-0.671014	0.00286398		-0.672763	0.00181984		-0.672523	0.00284785		-0.672806	0.00185161		-0.670468	0.00255799		-0.672762	0.00192964		-0.671159	0.00227107
-0.665682	0.00397505		-0.66725	0.00429569		-0.662448	0.00280861		-0.670853	0.00279032		-0.66273	0.00379344		-0.668111	0.00279692		-0.666863	0.0030924		-0.665691	0.00237262		-0.661239	0.00354876		-0.664453	0.0026907		-0.667452	0.00258608		-0.665336	0.00274995		-0.666866	0.00216676		-0.663281	0.00267965		-0.667761	0.00245758		-0.664285	0.00216805
-0.660682	0.00483551		-0.662875	0.00356172		-0.659011	0.00335881		-0.665226	0.00258275		-0.657105	0.00475291		-0.661233	0.00316738		-0.6628	0.00259386		-0.658505	0.00283861		-0.656551	0.00373796		-0.659768	0.00284572		-0.663077	0.00317544		-0.660018	0.00294959		-0.662808	0.00314474		-0.657963	0.00277152		-0.660574	0.00304416		-0.659288	0.00297499
-0.656619	0.00477168		-0.657561	0.00405846		-0.654011	0.00337983		-0.657413	0.00380147		-0.65273	0.00501779		-0.656861	0.00398691		-0.656239	0.00358529		-0.653507	0.0037971		-0.651552	0.00362127		-0.654763	0.00335175		-0.656825	0.00325784		-0.655647	0.00309441		-0.656868	0.00368133		-0.653592	0.00302751		-0.6537	0.00298219		-0.654596	0.00408261
-0.649432	0.00483386		-0.650061	0.00431472		-0.646199	0.00352502		-0.651478	0.00379684		-0.646479	0.00479866		-0.65186	0.0039762		-0.64874	0.00360661		-0.649132	0.004259		-0.644365	0.00403528		-0.647264	0.00342714		-0.648699	0.00326949		-0.648773	0.00297753		-0.648743	0.00421155		-0.647031	0.00346261		-0.648699	0.00472104		-0.647722	0.00432747
-0.64162	0.00526326		-0.642874	0.00474118		-0.639636	0.00462602		-0.647102	0.00396046		-0.638667	0.00509725		-0.644673	0.00404348		-0.643426	0.00373516		-0.642254	0.00414934		-0.636863	0.00577802		-0.639764	0.00329102		-0.642451	0.00284387		-0.64096	0.00402948		-0.642181	0.0045539		-0.639218	0.00410575		-0.643698	0.00372357		-0.639909	0.00396809
-0.636307	0.00464566		-0.638186	0.00501301		-0.634948	0.00473136		-0.641788	0.00406814		-0.632418	0.00532819		-0.636861	0.00428323		-0.639052	0.00360443		-0.634441	0.00461964		-0.631864	0.00529021		-0.63508	0.00355136		-0.638388	0.00366923		-0.635337	0.00564621		-0.637806	0.00465761		-0.633282	0.00481437		-0.636511	0.00432503		-0.634286	0.00407231
-0.631932	0.00561728		-0.633498	0.00505864		-0.629948	0.00469901		-0.633976	0.0044593		-0.628043	0.00602957		-0.631547	0.00447478		-0.632802	0.00382456		-0.628819	0.00527543		-0.627176	0.00580505		-0.6307	0.00435554		-0.632765	0.00450795		-0.631271	0.00508718		-0.632805	0.00559244		-0.629216	0.00498608		-0.629011	0.00471882		-0.63022	0.0052142
-0.625057	0.00579483		-0.625998	0.00588993		-0.622761	0.00530077		-0.626789	0.00387529		-0.622418	0.00620798		-0.627484	0.00457248		-0.624676	0.00418868		-0.624443	0.00551134		-0.620302	0.00737467		-0.623201	0.00532641		-0.62464	0.00538983		-0.625022	0.00513027		-0.62468	0.00577605		-0.62328	0.0054875		-0.623697	0.00514193		-0.623659	0.00648019
-0.616932	0.00681781		-0.618499	0.00623075		-0.615261	0.00544737		-0.622101	0.00518296		-0.614605	0.00754353		-0.62061	0.00510534		-0.618426	0.00578632		-0.618195	0.00592067		-0.612489	0.00703188		-0.615388	0.00608535		-0.617762	0.00631593		-0.616897	0.00549414		-0.617493	0.0058058		-0.615155	0.00563091		-0.619322	0.00588886		-0.615533	0.00648738
-0.611932	0.00671619		-0.613501	0.00719892		-0.61026	0.00650914		-0.617413	0.00558275		-0.607729	0.00860917		-0.612485	0.00579932		-0.614363	0.00679885		-0.610069	0.00798349		-0.606864	0.00769302		-0.610391	0.00734884		-0.6137	0.00771489		-0.610649	0.0059766		-0.613117	0.00604424		-0.608594	0.00629074		-0.612448	0.00691165		-0.609598	0.00701831
-0.608182	0.00752492		-0.609126	0.0076284		-0.605886	0.00743806		-0.6096	0.00609043		-0.603667	0.00910215		-0.607171	0.00738376		-0.608739	0.00657285		-0.60413	0.00763728		-0.602802	0.00885527		-0.606012	0.00751405		-0.608389	0.00686408		-0.606582	0.00719427		-0.60812	0.00759472		-0.604527	0.007539		-0.604323	0.00799197		-0.605531	0.00807275
-0.601932	0.00784151		-0.601935	0.00878407		-0.599011	0.00768778		-0.6021	0.00679726		-0.598355	0.00886289		-0.603108	0.00803725		-0.600926	0.00693132		-0.600067	0.0081175		-0.595926	0.0089177		-0.598825	0.00808443		-0.600264	0.00752246		-0.600646	0.00805575		-0.600308	0.00753586		-0.598592	0.00856824		-0.599013	0.00857432		-0.599283	0.00758374
-0.594432	0.00752895		-0.593814	0.00947003		-0.590886	0.00894145		-0.597416	0.00696929		-0.59023	0.0110331		-0.596234	0.00852297		-0.594052	0.00849503		-0.594132	0.00950513		-0.587802	0.00982339		-0.591012	0.00899266		-0.59339	0.00985291		-0.592521	0.00933571		-0.593117	0.00753224		-0.590466	0.00904769		-0.59495	0.00922531		-0.590845	0.00971585
-0.588494	0.00942486		-0.589125	0.0102377		-0.585574	0.00988412		-0.592728	0.00892386		-0.583355	0.0133711		-0.587796	0.00964525		-0.589989	0.00822988		-0.585693	0.00983152		-0.582488	0.0121466		-0.586328	0.00932201		-0.589327	0.0105734		-0.586273	0.0108537		-0.589054	0.00908102		-0.583905	0.0109028		-0.588072	0.0100769		-0.585222	0.0116112
-0.58412	0.0107767		-0.585376	0.0108653		-0.581511	0.0111885		-0.585228	0.0113901		-0.579606	0.0126679		-0.582799	0.0111232		-0.584365	0.00927003		-0.579754	0.0110143		-0.579051	0.013074		-0.582574	0.0103821		-0.584952	0.0109464		-0.582519	0.0122226		-0.584683	0.0101353		-0.580464	0.0124072		-0.579947	0.0114519		-0.581781	0.0117485
-0.578494	0.0107259		-0.578498	0.011864		-0.574636	0.0130702		-0.577415	0.0114315		-0.574917	0.013312		-0.579045	0.0125898		-0.576239	0.0117899		-0.576004	0.0122268		-0.572801	0.013178		-0.576013	0.0124119		-0.577765	0.0122013		-0.577522	0.011604		-0.577492	0.0112752		-0.575467	0.0120169		-0.574637	0.0126899		-0.576158	0.0125013
-0.570682	0.0127289		-0.570998	0.0142785		-0.566511	0.014219		-0.57304	0.010748		-0.567418	0.0162293		-0.573109	0.0136463		-0.569363	0.0133869		-0.570694	0.0135323		-0.565301	0.0140929		-0.5682	0.0135811		-0.570574	0.0125648		-0.569709	0.0124869		-0.570305	0.0131202		-0.567654	0.0122571		-0.5712	0.0137769		-0.568345	0.0152446
-0.563807	0.0145828		-0.565688	0.0151902		-0.561199	0.0161785		-0.56929	0.0135352		-0.560542	0.0178157		-0.565297	0.015673		-0.565613	0.0148438		-0.563194	0.0147877		-0.559364	0.0175778		-0.56289	0.0160032		-0.565577	0.0135933		-0.563148	0.0147624		-0.565304	0.0142372		-0.561093	0.0140952		-0.564947	0.015496		-0.56241	0.0156457
-0.559432	0.0158668		-0.561312	0.0170292		-0.557761	0.0180212		-0.562412	0.0150673		-0.555542	0.0201368		-0.559361	0.0177785		-0.560927	0.0152582		-0.556629	0.0166745		-0.554988	0.0208262		-0.558519	0.0168308		-0.560889	0.0153476		-0.558769	0.0167849		-0.560932	0.0155939		-0.556401	0.0174049		-0.557448	0.0167184		-0.558038	0.0173672
-0.554432	0.0170859		-0.55506	0.0195908		-0.551511	0.0199338		-0.554913	0.0168042		-0.550854	0.0213104		-0.555299	0.0188436		-0.553425	0.0162018		-0.552254	0.0194258		-0.549364	0.0206565		-0.552262	0.0175612		-0.554015	0.0167045		-0.553771	0.0171244		-0.554054	0.0175923		-0.551404	0.0197732		-0.551512	0.0189217		-0.552408	0.0179256
-0.546307	0.0183688		-0.546939	0.0220898		-0.544011	0.0220576		-0.549915	0.0199817		-0.543667	0.023809		-0.549359	0.0207198		-0.546551	0.0200735		-0.546944	0.0209591		-0.541551	0.0232886		-0.54445	0.0209204		-0.546202	0.0186188		-0.546272	0.0188474		-0.545929	0.0214575		-0.544217	0.0222873		-0.547136	0.0212707		-0.544908	0.0210595
-0.53912	0.0228732		-0.540686	0.0249453		-0.538073	0.0246298		-0.545227	0.0220635		-0.536168	0.0260177		-0.541547	0.0231906		-0.541863	0.021624		-0.539444	0.0229526		-0.534677	0.0270483		-0.537889	0.0265388		-0.540576	0.0214588		-0.538772	0.021961		-0.540306	0.026239		-0.536717	0.0260247		-0.54151	0.0240863		-0.537721	0.0263822
-0.534744	0.027679		-0.536311	0.0285526		-0.533699	0.0282533		-0.538975	0.0234967		-0.530856	0.0290402		-0.534673	0.0280256		-0.537177	0.0234113		-0.531944	0.0279477		-0.530302	0.0310662		-0.533517	0.0294357		-0.536513	0.024747		-0.533775	0.0255496		-0.536243	0.0279879		-0.53172	0.0290837		-0.533697	0.0261201		-0.533037	0.0279894
-0.530057	0.0302787		-0.530688	0.030319		-0.528074	0.0309701		-0.531162	0.0281546		-0.52648	0.034815		-0.530297	0.0322827		-0.529988	0.0276191		-0.527256	0.0329049		-0.525302	0.0357828		-0.528199	0.0298638		-0.529952	0.0277812		-0.529396	0.0290249		-0.529995	0.0288656		-0.527341	0.0310258		-0.52651	0.0291418		-0.528032	0.0305559
-0.522245	0.0321981		-0.522876	0.0340265		-0.520261	0.0343089		-0.524914	0.0321933		-0.519917	0.0375734		-0.525296	0.0354408		-0.522175	0.0327375		-0.522568	0.0346446		-0.51749	0.0398848		-0.520387	0.0340268		-0.521826	0.0321832		-0.522209	0.0312466		-0.52187	0.0332508		-0.520154	0.0360283		-0.522135	0.0365497		-0.520532	0.0345156
-0.514745	0.0387828		-0.515998	0.0402291		-0.513386	0.0420648		-0.520538	0.0361895		-0.511792	0.0415124		-0.517484	0.0385557		-0.517176	0.0352099		-0.515381	0.0377452		-0.510301	0.0460146		-0.513513	0.0434518		-0.515887	0.0378237		-0.514396	0.0364363		-0.515617	0.0404377		-0.512341	0.0413414		-0.517447	0.0432137		-0.513032	0.0388354
-0.510682	0.0457545		-0.511939	0.0455382		-0.508698	0.0468025		-0.514915	0.040556		-0.506167	0.0500345		-0.510297	0.0458411		-0.512801	0.0390784		-0.507568	0.0479328		-0.505615	0.0533779		-0.509141	0.0493035		-0.512137	0.0427159		-0.509086	0.0429204		-0.511555	0.0454058		-0.507031	0.0486383		-0.509634	0.0451786		-0.508348	0.0465698
-0.50662	0.047338		-0.506312	0.0500371		-0.503699	0.0542294		-0.50679	0.0456889		-0.502104	0.0542189		-0.505921	0.0513482		-0.505927	0.0437596		-0.502567	0.0548271		-0.500614	0.0559334		-0.503831	0.0508809		-0.505889	0.04513		-0.50502	0.0474453		-0.505619	0.0499218		-0.502652	0.0520232		-0.502135	0.0521105		-0.503656	0.0520502
-0.499432	0.05153		-0.498187	0.0539572		-0.495886	0.0591401		-0.500225	0.0547867		-0.495543	0.0616407		-0.50092	0.0568133		-0.497801	0.0491561		-0.498192	0.0584318		-0.493114	0.0630891		-0.496019	0.0578447		-0.49745	0.0520916		-0.497833	0.0521424		-0.497181	0.0549322		-0.495778	0.0593916		-0.49745	0.057369		-0.496156	0.0555624
-0.491932	0.0596085		-0.491	0.0635053		-0.488698	0.0638919		-0.496162	0.0609709		-0.487418	0.0710776		-0.493108	0.0630197		-0.49249	0.0596966		-0.491005	0.0606286		-0.485614	0.0734599		-0.488824	0.0674012		-0.491515	0.0633156		-0.489707	0.0580004		-0.491242	0.0651308		-0.487653	0.0669551		-0.492762	0.0624707		-0.488656	0.066399
-0.486932	0.068267		-0.48725	0.0760345		-0.484011	0.073811		-0.49054	0.0647711		-0.481793	0.0786693		-0.485608	0.0724379		-0.488427	0.069515		-0.483193	0.0702055		-0.481239	0.0842634		-0.485078	0.0737611		-0.488078	0.0678303		-0.48471	0.0661263		-0.487492	0.0725895		-0.482342	0.0765622		-0.485262	0.0696896		-0.483972	0.0765286
-0.482557	0.0740897		-0.482875	0.0797482		-0.479324	0.0792887		-0.482414	0.0721619		-0.478043	0.0863196		-0.481545	0.0844155		-0.481864	0.0740389		-0.478504	0.079074		-0.477176	0.0906481		-0.480394	0.0788433		-0.482451	0.0737329		-0.481269	0.0730147		-0.482182	0.0780443		-0.478902	0.085076		-0.477762	0.0830331		-0.479913	0.0794385
-0.475682	0.082609		-0.475375	0.0865175		-0.471511	0.086179		-0.475853	0.0829699		-0.472418	0.0902054		-0.477483	0.091576		-0.473426	0.0781551		-0.474754	0.0866471		-0.469989	0.0957103		-0.472894	0.0853047		-0.474639	0.0819392		-0.475021	0.0787358		-0.474682	0.0861724		-0.472653	0.0886282		-0.473387	0.090271		-0.473344	0.0842233
-0.46787	0.0900453		-0.468188	0.0939143		-0.464011	0.101407		-0.472103	0.0895255		-0.464606	0.0972089		-0.470296	0.0946086		-0.467801	0.0907586		-0.468193	0.0906114		-0.462802	0.105824		-0.466012	0.0980479		-0.468703	0.092408		-0.467208	0.0893387		-0.468117	0.0945362		-0.465153	0.0974501		-0.469324	0.0960069		-0.465845	0.0962747
-0.462244	0.101301		-0.4635	0.102376		-0.459948	0.110152		-0.467102	0.0974111		-0.458668	0.110391		-0.463109	0.10381		-0.464364	0.0996865		-0.460693	0.102371		-0.457801	0.113593		-0.461015	0.105415		-0.464327	0.101388		-0.461585	0.0990939		-0.463741	0.103511		-0.459218	0.10693		-0.46245	0.103755		-0.460535	0.107896
-0.45787	0.110421		-0.458812	0.110365		-0.455886	0.114202		-0.459602	0.107053		-0.454293	0.122155		-0.458108	0.120771		-0.458426	0.103983		-0.455067	0.114617		-0.453115	0.124234		-0.45633	0.110876		-0.458701	0.104348		-0.457206	0.105082		-0.458744	0.114603		-0.454838	0.117531		-0.454947	0.115747		-0.456476	0.113048
-0.451619	0.117037		-0.451625	0.118351		-0.449011	0.120405		-0.452728	0.114575		-0.448668	0.130976		-0.453736	0.125648		-0.450926	0.114319		-0.450691	0.120565		-0.446552	0.133		-0.449456	0.119147		-0.451201	0.113019		-0.451271	0.113379		-0.450932	0.118723		-0.448903	0.127268		-0.449637	0.130778		-0.449907	0.11813
-0.443495	0.129245		-0.443812	0.130748		-0.441511	0.136141		-0.44804	0.128014		-0.440856	0.137256		-0.446858	0.131234		-0.444989	0.124659		-0.444756	0.129065		-0.438739	0.143098		-0.441644	0.134709		-0.444014	0.127122		-0.443458	0.127609		-0.443745	0.129996		-0.44109	0.134818		-0.445261	0.142585		-0.441781	0.131178
-0.437557	0.14421		-0.438498	0.147761		-0.436511	0.155151		-0.443352	0.139515		-0.433667	0.153145		-0.438733	0.147775		-0.440613	0.137156		-0.43663	0.142413		-0.432802	0.16262		-0.436326	0.150267		-0.439326	0.140952		-0.436897	0.140431		-0.439056	0.145311		-0.434529	0.148827		-0.4387	0.14729		-0.435533	0.14953
-0.433495	0.156363		-0.434436	0.159976		-0.432136	0.160404		-0.436165	0.148582		-0.429293	0.164709		-0.43311	0.156216		-0.434989	0.146443		-0.430382	0.154595		-0.428739	0.174132		-0.432267	0.16127		-0.434638	0.143469		-0.432525	0.15441		-0.434368	0.153427		-0.430157	0.162777		-0.430575	0.155775		-0.431474	0.162831
-0.427244	0.163542		-0.427874	0.166302		-0.425574	0.168395		-0.428352	0.162346		-0.424605	0.172962		-0.428735	0.170493		-0.427176	0.156414		-0.426006	0.168523		-0.422489	0.179237		-0.425706	0.166923		-0.427138	0.155413		-0.427207	0.157068		-0.426869	0.162412		-0.425153	0.169496		-0.424635	0.170835		-0.425844	0.169576
-0.41912	0.174844		-0.419749	0.179905		-0.417449	0.175883		-0.423038	0.174124		-0.416792	0.185235		-0.422795	0.181128		-0.420302	0.170448		-0.420693	0.173481		-0.414363	0.187863		-0.417581	0.177951		-0.419638	0.174084		-0.419395	0.17066		-0.419056	0.17652		-0.41734	0.183387		-0.420572	0.186066		-0.417718	0.175867
-0.41287	0.191139		-0.414126	0.198788		-0.411824	0.19359		-0.418976	0.181441		-0.409293	0.198516		-0.414983	0.193539		-0.415614	0.183584		-0.412567	0.187115		-0.408115	0.207476		-0.411637	0.197735		-0.414637	0.188576		-0.412521	0.188961		-0.414055	0.19544		-0.410153	0.195877		-0.414637	0.19367		-0.411157	0.196112
-0.409432	0.203626		-0.410064	0.20692		-0.407448	0.21156		-0.412102	0.189007		-0.404604	0.214857		-0.408421	0.21046		-0.410613	0.191552		-0.405693	0.207374		-0.404052	0.221293		-0.407579	0.20839		-0.409953	0.197708		-0.408149	0.201826		-0.40968	0.207315		-0.405469	0.211653		-0.406199	0.207232		-0.407098	0.210231
-0.40412	0.211202		-0.403498	0.213478		-0.401198	0.217506		-0.403976	0.209365		-0.399918	0.224112		-0.404359	0.222909		-0.403113	0.202974		-0.401318	0.219589		-0.398115	0.228948		-0.40133	0.213465		-0.402762	0.203635		-0.402831	0.210022		-0.402493	0.215398		-0.400777	0.222031		-0.39995	0.226328		-0.401475	0.215001
-0.39662	0.22073		-0.395373	0.228894		-0.393385	0.230446		-0.398663	0.23236		-0.392416	0.231111		-0.398423	0.232519		-0.395926	0.221122		-0.396004	0.228181		-0.389989	0.240592		-0.393205	0.223878		-0.39495	0.219496		-0.395019	0.21855		-0.394367	0.228573		-0.392964	0.231239		-0.395888	0.241379		-0.39335	0.228458
-0.390057	0.23552		-0.38975	0.247649		-0.387135	0.251841		-0.3946	0.241806		-0.384917	0.246364		-0.390298	0.237997		-0.391238	0.232829		-0.388191	0.240823		-0.383739	0.259598		-0.387574	0.244556		-0.390265	0.237599		-0.387832	0.238465		-0.389679	0.244283		-0.385464	0.247861		-0.389948	0.239783		-0.386781	0.241358
-0.385369	0.247231		-0.386	0.256059		-0.383074	0.261211		-0.387726	0.243922		-0.380543	0.263751		-0.384045	0.261776		-0.386552	0.241065		-0.381317	0.261064		-0.379989	0.2744		-0.383828	0.260114		-0.386515	0.247097		-0.383773	0.250754		-0.386242	0.251692		-0.381093	0.262455		-0.381823	0.25283		-0.383035	0.253614
-0.380369	0.256052		-0.380374	0.267916		-0.376824	0.26996		-0.379288	0.258591		-0.376481	0.275181		-0.380296	0.277574		-0.379052	0.248121		-0.377255	0.275156		-0.37499	0.276008		-0.378205	0.265758		-0.379637	0.257313		-0.379394	0.258264		-0.379681	0.266427		-0.377026	0.272503		-0.375574	0.268195		-0.378038	0.267088
-0.37287	0.271842		-0.372561	0.28264		-0.368699	0.285794		-0.373978	0.27646		-0.369605	0.282302		-0.374986	0.280981		-0.371239	0.268749		-0.372879	0.281176		-0.367488	0.289116		-0.370393	0.280796		-0.372138	0.268664		-0.372207	0.266386		-0.371868	0.282744		-0.370152	0.281884		-0.371824	0.287119		-0.370538	0.280825
-0.365682	0.285688		-0.366313	0.294973		-0.362761	0.305422		-0.370541	0.287771		-0.362418	0.300422		-0.367486	0.293506		-0.366864	0.28318		-0.365379	0.287349		-0.360927	0.310318		-0.364137	0.29747		-0.366828	0.28391		-0.36502	0.279437		-0.366554	0.293689		-0.362653	0.301971		-0.366823	0.294937		-0.363656	0.298752
-0.360682	0.305556		-0.361937	0.30946		-0.359011	0.325004		-0.364601	0.299261		-0.357106	0.316231		-0.361234	0.312299		-0.362801	0.295384		-0.358505	0.301418		-0.356239	0.323821		-0.359765	0.309479		-0.362765	0.298662		-0.360023	0.298394		-0.362179	0.305432		-0.357655	0.313661		-0.359324	0.306468		-0.358972	0.309663
-0.356307	0.316791		-0.356623	0.322835		-0.353699	0.3299		-0.356789	0.311697		-0.35273	0.326665		-0.356545	0.324107		-0.355925	0.312236		-0.353504	0.317519		-0.35124	0.335031		-0.354455	0.328534		-0.3562	0.312331		-0.355644	0.308143		-0.35593	0.315374		-0.353276	0.326569		-0.35245	0.326538		-0.354288	0.328309
-0.349119	0.324871		-0.348811	0.33378		-0.346198	0.340044		-0.350853	0.326381		-0.346167	0.343625		-0.351548	0.332925		-0.348738	0.326447		-0.349129	0.329995		-0.34374	0.346478		-0.346643	0.340793		-0.348075	0.32846		-0.34877	0.319747		-0.348118	0.32863		-0.346402	0.334737		-0.347761	0.345938		-0.347101	0.33106
-0.341307	0.341393		-0.341624	0.347896		-0.339636	0.356987		-0.346478	0.339738		-0.338355	0.35334		-0.344048	0.342914		-0.343426	0.338844		-0.342255	0.343712		-0.336238	0.366303		-0.339456	0.35026		-0.341826	0.349677		-0.340644	0.339824		-0.341557	0.351528		-0.338589	0.348314		-0.34276	0.355081		-0.339288	0.34894
-0.335995	0.354401		-0.337249	0.364376		-0.334948	0.371536		-0.340851	0.35172		-0.332104	0.365426		-0.336549	0.36343		-0.338738	0.353176		-0.334129	0.361399		-0.331552	0.385948		-0.335076	0.364732		-0.338076	0.357382		-0.335021	0.354748		-0.337181	0.365424		-0.332654	0.369155		-0.335261	0.368211		-0.33397	0.363101
-0.331619	0.367932		-0.332251	0.378787		-0.329949	0.382053		-0.333038	0.361662		-0.328042	0.386838		-0.331548	0.38358		-0.332488	0.363698		-0.328507	0.38133		-0.326864	0.397502		-0.330079	0.380983		-0.33245	0.366444		-0.330963	0.37461		-0.331867	0.37508		-0.328595	0.386435		-0.327761	0.383579		-0.329599	0.380729
-0.324432	0.384557		-0.324748	0.390234		-0.32276	0.395894		-0.326164	0.38842		-0.322104	0.402693		-0.327172	0.398536		-0.324675	0.373811		-0.324444	0.395931		-0.319677	0.405883		-0.32258	0.387043		-0.324324	0.379792		-0.324706	0.38135		-0.323742	0.388573		-0.322339	0.393899		-0.32276	0.403305		-0.323038	0.390559
-0.316619	0.400271		-0.317248	0.408819		-0.31526	0.406547		-0.321789	0.405508		-0.313981	0.414059		-0.319985	0.4094		-0.318427	0.397735		-0.318192	0.404672		-0.311864	0.421408		-0.31508	0.405297		-0.31745	0.392523		-0.316581	0.392874		-0.316868	0.402991		-0.314213	0.409784		-0.318384	0.4163		-0.314912	0.405006
-0.31162	0.416425		-0.312564	0.426929		-0.310261	0.425268		-0.316788	0.412671		-0.30773	0.436546		-0.312173	0.425173		-0.314364	0.408071		-0.310066	0.410469		-0.306863	0.437756		-0.310388	0.424714		-0.313387	0.40985		-0.310646	0.413025		-0.312492	0.417155		-0.308278	0.432353		-0.31151	0.4265		-0.309282	0.425465
-0.307869	0.429133		-0.307875	0.438458		-0.305573	0.44613		-0.308975	0.420334		-0.303355	0.453712		-0.306859	0.449881		-0.308427	0.417545		-0.304131	0.434747		-0.30249	0.451495		-0.306016	0.436518		-0.307765	0.421294		-0.306899	0.429076		-0.307491	0.435339		-0.304219	0.443906		-0.303385	0.443205		-0.305223	0.436406
-0.301307	0.435931		-0.300376	0.44665		-0.298699	0.454387		-0.301476	0.442711		-0.29773	0.458151		-0.302796	0.463292		-0.300301	0.432606		-0.300068	0.444235		-0.295301	0.46385		-0.298516	0.445383		-0.299639	0.443447		-0.300331	0.438783		-0.29937	0.445932		-0.298276	0.449487		-0.298075	0.461226		-0.298662	0.446588
-0.293807	0.450194		-0.292876	0.46491		-0.290886	0.475327		-0.2971	0.457679		-0.289605	0.467742		-0.295609	0.466297		-0.294051	0.451767		-0.29382	0.453956		-0.287488	0.48764		-0.290704	0.464599		-0.293074	0.466236		-0.2919	0.458822		-0.292492	0.462812		-0.289845	0.465979		-0.294012	0.480454		-0.290536	0.458186
-0.288494	0.475047		-0.288188	0.48506		-0.285573	0.494698		-0.292416	0.469953		-0.283041	0.492239		-0.287797	0.480779		-0.289675	0.468467		-0.285381	0.479043		-0.282489	0.505901		-0.286012	0.482867		-0.289324	0.483611		-0.285957	0.481218		-0.288429	0.48584		-0.283902	0.488835		-0.287134	0.491144		-0.284906	0.479601
-0.28412	0.489506		-0.284438	0.500919		-0.281199	0.508238		-0.284603	0.479625		-0.279292	0.508785		-0.282483	0.495315		-0.284051	0.481932		-0.279755	0.501091		-0.278739	0.507248		-0.282266	0.499195		-0.28464	0.492		-0.282524	0.485972		-0.283745	0.494749		-0.280156	0.507402		-0.279013	0.503853		-0.281473	0.497555
-0.277869	0.503505		-0.277564	0.511623		-0.274323	0.517085		-0.277103	0.507501		-0.274292	0.51692		-0.278733	0.509492		-0.275925	0.494435		-0.276005	0.513381		-0.272489	0.517173		-0.275392	0.515776		-0.27714	0.493465		-0.277206	0.500395		-0.276554	0.502633		-0.274838	0.51172		-0.274012	0.528015		-0.275537	0.511223
-0.270057	0.516632		-0.270373	0.52693		-0.26651	0.535841		-0.272728	0.528296		-0.266793	0.530721		-0.272485	0.527067		-0.269364	0.520821		-0.270382	0.521283		-0.264677	0.542708		-0.268205	0.532581		-0.26995	0.515416		-0.269706	0.506284		-0.26968	0.520531		-0.267338	0.528221		-0.270262	0.543101		-0.268037	0.528684
-0.263495	0.532401		-0.265063	0.557347		-0.261511	0.562843		-0.268665	0.538269		-0.259917	0.545845		-0.264985	0.54528		-0.265614	0.53891		-0.262882	0.54112		-0.259052	0.561338		-0.262887	0.548511		-0.265265	0.531705		-0.263145	0.535903		-0.264679	0.542277		-0.260777	0.555933		-0.26401	0.552271		-0.262094	0.547796
-0.259432	0.54913		-0.260688	0.569968		-0.257761	0.571566		-0.261787	0.550559		-0.255543	0.568178		-0.259358	0.569955		-0.260613	0.552206		-0.25663	0.563906		-0.254676	0.579862		-0.258516	0.561168		-0.260577	0.543029		-0.258773	0.557909		-0.259995	0.556503		-0.256093	0.576517		-0.25651	0.567415		-0.257722	0.56451
-0.254119	0.557424		-0.254126	0.585007		-0.251198	0.578014		-0.254288	0.567745		-0.250542	0.577834		-0.254983	0.572603		-0.253426	0.562201		-0.252255	0.574241		-0.248739	0.590433		-0.251954	0.571391		-0.25339	0.557908		-0.253456	0.561793		-0.253117	0.565606		-0.251096	0.588136		-0.250574	0.582997		-0.252099	0.579184
-0.245995	0.575803		-0.246001	0.592513		-0.243699	0.592973		-0.24929	0.592305		-0.243355	0.589488		-0.249047	0.586548		-0.24655	0.579548		-0.246945	0.58367		-0.240926	0.602178		-0.244142	0.584898		-0.245577	0.57747		-0.245956	0.578922		-0.244991	0.580953		-0.243588	0.598462		-0.246199	0.600277		-0.244287	0.586392
-0.23912	0.596127		-0.239749	0.60682		-0.238074	0.615998		-0.244915	0.599984		-0.235856	0.61604		-0.241235	0.602944		-0.241551	0.588889		-0.239445	0.600282		-0.234052	0.619547		-0.237893	0.610635		-0.240576	0.595565		-0.238456	0.597103		-0.239681	0.605977		-0.236088	0.605695		-0.240259	0.619116		-0.2371	0.596558
-0.234744	0.618554		-0.235686	0.62747		-0.233698	0.641267		-0.238041	0.613795		-0.230542	0.635796		-0.234673	0.620115		-0.236863	0.60235		-0.231941	0.61504		-0.229989	0.645271		-0.233827	0.626031		-0.236201	0.614557		-0.233772	0.612374		-0.235619	0.620873		-0.231404	0.634376		-0.232447	0.628238		-0.232721	0.622114
-0.229744	0.626568		-0.230063	0.641979		-0.227761	0.653234		-0.229916	0.627849		-0.226479	0.647572		-0.230298	0.640699		-0.229676	0.621701		-0.227257	0.632052		-0.224988	0.663822		-0.227891	0.623872		-0.22964	0.634599		-0.2294	0.628733		-0.229057	0.634487		-0.22672	0.645063		-0.225886	0.645426		-0.228036	0.64077
-0.22162	0.63884		-0.221938	0.655257		-0.219948	0.663399		-0.224289	0.645424		-0.219605	0.661918		-0.224984	0.657756		-0.221863	0.631762		-0.222569	0.654224		-0.216865	0.668654		-0.220079	0.6463		-0.221514	0.644469		-0.2219	0.641532		-0.220932	0.651848		-0.219533	0.660109		-0.22151	0.66902		-0.220224	0.644857
-0.214432	0.667199		-0.215373	0.680096		-0.213385	0.683423		-0.220226	0.658129		-0.21148	0.678658		-0.217171	0.66927		-0.216864	0.658745		-0.215382	0.671568		-0.209989	0.696742		-0.213517	0.673037		-0.215888	0.652508		-0.214393	0.659855		-0.214993	0.6676		-0.21172	0.677006		-0.2162	0.677869		-0.212724	0.6593
-0.210369	0.685387		-0.211001	0.690746		-0.209012	0.704999		-0.214291	0.671302		-0.206168	0.70342		-0.209985	0.694259		-0.212802	0.675586		-0.207569	0.685002		-0.205614	0.718974		-0.209138	0.691334		-0.211825	0.676188		-0.209396	0.680304		-0.21093	0.685508		-0.206715	0.697222		-0.208388	0.685579		-0.208032	0.6877
-0.205995	0.694111		-0.205374	0.703129		-0.203698	0.716687		-0.206165	0.683791		-0.202105	0.718251		-0.205609	0.716243		-0.205926	0.682451		-0.202881	0.703509		-0.200302	0.732607		-0.203515	0.704074		-0.205264	0.688303		-0.205024	0.691994		-0.204681	0.6966		-0.202656	0.706727		-0.201197	0.706104		-0.203348	0.707991
-0.198807	0.701869		-0.197249	0.718955		-0.195885	0.730265		-0.199913	0.715486		-0.195229	0.723396		-0.200608	0.723848		-0.1978	0.704776		-0.198506	0.719828		-0.192489	0.73777		-0.195703	0.715278		-0.197138	0.705399		-0.197525	0.711562		-0.196243	0.709281		-0.19547	0.719324		-0.196825	0.736062		-0.195848	0.715131
-0.191932	0.720452		-0.190688	0.746043		-0.188698	0.748045		-0.195538	0.730373		-0.187106	0.745124		-0.192796	0.734223		-0.192488	0.718399		-0.191006	0.738297		-0.185615	0.750674		-0.189141	0.728274		-0.191512	0.729002		-0.189712	0.724782		-0.190617	0.724576		-0.187344	0.736361		-0.191824	0.746323		-0.188348	0.73507
-0.186932	0.735711		-0.186938	0.769977		-0.184323	0.762338		-0.189915	0.747087		-0.181792	0.762969		-0.185296	0.764017		-0.188426	0.729556		-0.183193	0.754344		-0.181552	0.769064		-0.185388	0.747508		-0.187762	0.745382		-0.18502	0.754633		-0.18718	0.741491		-0.182652	0.763835		-0.184012	0.755131		-0.183969	0.757396
-0.182244	0.756082		-0.181937	0.771514		-0.179324	0.763767		-0.181789	0.756871		-0.178355	0.779691		-0.181546	0.779554		-0.181552	0.745732		-0.178505	0.762423		-0.176864	0.781745		-0.180391	0.75954		-0.181826	0.753473		-0.181274	0.761599		-0.181557	0.759654		-0.178906	0.773548		-0.176825	0.771582		-0.179597	0.761256
-0.175369	0.766392		-0.174437	0.779514		-0.171511	0.775094		-0.175228	0.767283		-0.172104	0.794341		-0.177171	0.782072		-0.173426	0.763081		-0.174755	0.772371		-0.169677	0.786656		-0.172891	0.771475		-0.174327	0.768857		-0.174713	0.76189		-0.173744	0.781535		-0.172345	0.780325		-0.172762	0.797738		-0.172723	0.769083
-0.167557	0.778915		-0.16725	0.79795		-0.164324	0.806296		-0.171478	0.786178		-0.164605	0.8118		-0.169984	0.798048		-0.168114	0.788927		-0.168194	0.783905		-0.162801	0.800836		-0.166017	0.797507		-0.168387	0.783852		-0.167213	0.776095		-0.167492	0.794547		-0.164845	0.793471		-0.168387	0.81521		-0.165536	0.784325
-0.161932	0.80106		-0.162875	0.827762		-0.160262	0.836514		-0.166477	0.795044		-0.15898	0.831569		-0.162797	0.811052		-0.164675	0.799937		-0.160694	0.806146		-0.157802	0.829039		-0.161637	0.820968		-0.164015	0.796082		-0.161895	0.794261		-0.163117	0.805359		-0.159215	0.81022		-0.1612	0.815528		-0.160219	0.792141
-0.157869	0.812732		-0.157874	0.838187		-0.155886	0.828672		-0.158978	0.810905		-0.154292	0.828184		-0.157796	0.82705		-0.158427	0.804644		-0.15538	0.807582		-0.153114	0.839811		-0.15664	0.82506		-0.158389	0.81282		-0.157524	0.809202		-0.157806	0.805248		-0.154843	0.821811		-0.1537	0.836872		-0.155847	0.809171
-0.151307	0.815024		-0.150687	0.843961		-0.148699	0.834495		-0.152103	0.832198		-0.148667	0.832537		-0.15342	0.840276		-0.150925	0.82109		-0.151005	0.829349		-0.14624	0.852855		-0.149453	0.832486		-0.150576	0.820425		-0.151275	0.822898		-0.150307	0.817398		-0.148907	0.841223		-0.148699	0.852957		-0.149286	0.823582
-0.143182	0.839747		-0.142874	0.852452		-0.14151	0.861651		-0.147415	0.846259		-0.141167	0.846471		-0.146546	0.85354		-0.144988	0.840114		-0.144756	0.839176		-0.138427	0.871722		-0.141954	0.849666		-0.143702	0.837134		-0.143463	0.831994		-0.142807	0.8458		-0.141095	0.855359		-0.144324	0.857227		-0.141473	0.838138
-0.137244	0.856898		-0.137561	0.869746		-0.136824	0.869553		-0.142414	0.8493		-0.13398	0.879456		-0.138421	0.869462		-0.140614	0.845024		-0.136631	0.859171		-0.132802	0.888251		-0.136644	0.859534		-0.139327	0.853428		-0.136894	0.851099		-0.138119	0.857137		-0.134526	0.861758		-0.137449	0.872272		-0.135538	0.861116
-0.133182	0.862789		-0.133498	0.87994		-0.132136	0.868197		-0.135227	0.857186		-0.129605	0.882427		-0.132798	0.886398		-0.134989	0.849074		-0.130379	0.867498		-0.12874	0.895112		-0.132264	0.871972		-0.134326	0.865413		-0.132835	0.866402		-0.133431	0.859035		-0.130467	0.874533		-0.129637	0.880702		-0.131471	0.876634
-0.126932	0.865614		-0.126311	0.894551		-0.125262	0.886784		-0.127728	0.869025		-0.124606	0.888848		-0.128735	0.894506		-0.127177	0.873674		-0.12632	0.885227		-0.122489	0.891225		-0.125703	0.882522		-0.126513	0.869657		-0.127212	0.882702		-0.125931	0.867002		-0.125157	0.879669		-0.12401	0.896585		-0.125535	0.880436
-0.118494	0.889009		-0.118186	0.908506		-0.117449	0.905322		-0.122726	0.88356		-0.116793	0.911277		-0.122483	0.892733		-0.120301	0.898869		-0.120381	0.903343		-0.114364	0.907713		-0.117578	0.898598		-0.119013	0.88955		-0.119399	0.881453		-0.118431	0.889492		-0.117032	0.892294		-0.119948	0.908684		-0.11741	0.884266
-0.112557	0.904434		-0.112876	0.918045		-0.111823	0.915442		-0.118351	0.901861		-0.109604	0.913004		-0.114358	0.909259		-0.115925	0.905369		-0.112568	0.902109		-0.108427	0.91609		-0.112268	0.896608		-0.114325	0.903193		-0.112525	0.880845		-0.11343	0.906719		-0.110158	0.915716		-0.113699	0.92066		-0.110849	0.89591
-0.10912	0.909179		-0.109126	0.928016		-0.107449	0.923311		-0.111477	0.895288		-0.104918	0.912057		-0.108422	0.919688		-0.110926	0.894044		-0.105694	0.917125		-0.104364	0.934206		-0.107888	0.898695		-0.10995	0.909696		-0.108459	0.906494		-0.109055	0.913981		-0.105778	0.92574		-0.105261	0.925435		-0.106782	0.909184
-0.103495	0.922184		-0.102248	0.931798		-0.101199	0.936727		-0.103352	0.911174		-0.10023	0.928253		-0.104047	0.931325		-0.103114	0.905429		-0.101631	0.927111		-0.0981135	0.943141		-0.101014	0.912216		-0.102137	0.918145		-0.103149	0.913621		-0.101555	0.919436		-0.100781	0.926589		-0.0993253	0.926388		-0.100847	0.918879
-0.0959941	0.916631		-0.0938137	0.940488		-0.0930734	0.943377		-0.0980377	0.922322		-0.0924173	0.946185		-0.0977982	0.944824		-0.0959269	0.919885		-0.0960046	0.933585		-0.0899882	0.943549		-0.0932018	0.924736		-0.0946375	0.91974		-0.0950236	0.92343		-0.0937425	0.92228		-0.0926559	0.92314		-0.0952627	0.935314		-0.0927214	0.922013
-0.0894319	0.928118		-0.0888126	0.957865		-0.0871358	0.95615		-0.0939751	0.937397		-0.0849176	0.952879		-0.0896729	0.947146		-0.0912387	0.937918		-0.0878793	0.939104		-0.0837397	0.95996		-0.0878917	0.944593		-0.090262	0.934106		-0.0878367	0.942624		-0.089367	0.927983		-0.085469	0.943866		-0.0890104	0.950696		-0.0861601	0.931413
-0.0850574	0.936002		-0.0850627	0.969758		-0.0830731	0.954773		-0.0867882	0.949228		-0.0808549	0.951781		-0.0837334	0.952735		-0.0865504	0.937479		-0.081318	0.941102		-0.0803008	0.969406		-0.0841381	0.9537		-0.0861994	0.939626		-0.084083	0.946474		-0.0853043	0.940065		-0.0814025	0.966801		-0.0808851	0.958569		-0.0827193	0.946782
-0.0797444	0.94981		-0.0791233	0.973371		-0.0768228	0.952234		-0.0789757	0.94661		-0.0767923	0.954892		-0.0799835	0.965217		-0.0787379	0.938323		-0.0775682	0.957097		-0.074676	0.9685		-0.0782024	0.960382		-0.0793253	0.943545		-0.0797114	0.943363		-0.0787431	0.946184		-0.0770309	0.966209		-0.0749494	0.965731		-0.077722	0.962184
-0.0722447	0.959319		-0.0716236	0.982412		-0.0686994	0.964153		-0.0736656	0.94551		-0.0696054	0.96445		-0.0746735	0.958985		-0.0712382	0.943643		-0.0725671	0.964912		-0.0671763	0.973592		-0.0703899	0.955165		-0.0718256	0.958253		-0.0722117	0.954353		-0.0712434	0.940177		-0.069844	0.959484		-0.0711996	0.982478		-0.0702223	0.960018
-0.0650569	0.962218		-0.0656879	0.980057		-0.0627618	0.986637		-0.0699158	0.945617		-0.0624166	0.970273		-0.0671738	0.967823		-0.0671756	0.963369		-0.0653802	0.966651		-0.0609259	0.984128		-0.0644542	0.965862		-0.0665117	0.963752		-0.0650248	0.965279		-0.0659295	0.962994		-0.0626571	0.975664		-0.0658857	0.990533		-0.0633482	0.963022
-0.0603696	0.96753		-0.0613124	0.989929		-0.05901	0.986314		-0.0636635	0.963535		-0.0574174	0.973081		-0.0606087	0.961395		-0.0631129	0.965462		-0.0585061	0.959386		-0.0562396	0.988808		-0.060075	0.965655		-0.0624529	0.974928		-0.0603327	0.972049		-0.061554	0.971651		-0.0576522	0.984555		-0.058386	0.98696		-0.0586562	0.967448
-0.0556823	0.963807		-0.0553729	0.983219		-0.0536981	0.98592		-0.0561638	0.985945		-0.0530419	0.982502		-0.0562332	0.970626		-0.055926	0.974409		-0.0538179	0.971469		-0.0512385	0.996756		-0.0544521	0.962163		-0.0558878	0.968012		-0.0556483	0.974389		-0.0553056	0.972287		-0.0529677	0.987325		-0.0518247	0.989816		-0.0539717	0.965191
-0.0484944	0.96353		-0.0475604	0.991395		-0.0458856	0.992027		-0.0502281	0.979392		-0.0461679	0.986043		-0.0509232	0.984915		-0.0487391	0.984956		-0.0491296	0.983127		-0.043426	0.998796		-0.0466396	0.977663		-0.0480753	0.974316		-0.0484614	0.973983		-0.0471803	0.983267		-0.0460937	0.997563		-0.0471365	0.992652		-0.0467848	0.966256
-0.0406819	0.968107		-0.0406864	1.00168		-0.0393243	1.00643		-0.0458527	0.992397		-0.0380426	0.988337		-0.0434235	1.00162		-0.0434253	0.977851		-0.0419427	0.980277		-0.0362391	0.999735		-0.0397655	0.984287		-0.0418268	0.970116		-0.0406489	0.979943		-0.0409318	0.982662		-0.0382812	0.987449		-0.0421354	0.998435		-0.0389723	0.968198
-0.0356818	0.986656		-0.0363109	0.996091		-0.0352616	1.01656		-0.0399132	0.986292		-0.0324178	0.993636		-0.0362328	1.00303		-0.0390517	0.983228		-0.0341302	0.989623		-0.0315509	0.991531		-0.0353939	0.98712		-0.0377642	0.976035		-0.0353312	0.981681		-0.0368691	0.971953		-0.0326507	0.986903		-0.0346357	0.997894		-0.0339751	0.985001
-0.0313073	0.982295		-0.0313137	1.00657		-0.0299477	1.01762		-0.0321007	0.982215		-0.0280423	1.00023		-0.0312355	1.00148		-0.0321757	0.989533		-0.0288164	0.986693		-0.0268645	0.993254		-0.030389	0.993953		-0.0318247	0.979549		-0.0312724	0.985867		-0.0312425	0.981807		-0.0285918	0.988329		-0.027136	1.0057		-0.0295958	0.985381
-0.0238067	0.976909		-0.0235012	1.00746		-0.0224481	1.01402		-0.0252266	0.983377		-0.0221048	0.99312		-0.02686	1.00837		-0.0243632	0.987205		-0.0244447	0.987836		-0.0193648	1.00787		-0.0225765	0.985736		-0.0236994	0.993148		-0.0247111	0.996867		-0.0231171	0.982939		-0.0223434	0.99384		-0.0224477	1.01131		-0.0227217	0.995026
-0.0159942	0.981907		-0.0163104	1.00663		-0.0149484	1.0062		-0.0208511	0.988212		-0.0139794	0.997034		-0.0196732	1.01346		-0.0184256	0.982298		-0.0178796	0.996028		-0.0118632	1.00737		-0.0150768	0.981571		-0.0171381	0.993127		-0.0165858	0.986336		-0.0162431	0.984168		-0.0142181	1.00537		-0.0177595	1.00288		-0.0145964	1.00111
-0.0113069	0.986263		-0.011626	1.01196		-0.0102601	1.01403		-0.0155373	0.989664		-0.00772907	1.00699		-0.0118607	1.00932		-0.014363	0.993491		-0.00975432	0.999457		-0.00686404	1.00406		-0.0107051	0.993128		-0.0130755	0.989434		-0.0106501	0.990624		-0.0121804	0.984158		-0.00828238	0.997738		-0.0105726	1.00292		-0.00928635	0.999268
-0.00755701	0.998983		-0.00693774	1.01225		-0.00588655	1.00875		-0.00772476	0.998956		-0.00366832	1.00974		-0.00654678	1.00846		-0.00811451	0.995381		-0.00413145	0.99899		-0.00248858	1		-0.00601306	1.00131		-0.00745259	0.99618		-0.00658364	0.994622		-0.00655755	0.990387		-0.00421591	1.00227		-0.00244729	1		-0.00490708	0.996051
-0.000994781	1		0.000874761	1		0.00130225	1		-0.00053787	1		0.00226926	1		-0.00248413	1		-0.000302014	1		-6.87983e-05	1		0.00469831	1.00089		0.00179944	1		0.000672718	1		-0.000335165	1		0.00156776	1		0.00203256	1		0.00254997	1.00332		0.00196701	1
0.00650587	0.989036		0.00837446	1.00974		0.00911475	1.00823		0.00383759	0.994236		0.0103946	1.00585		0.00470276	1.0123		0.00594837	1.00035		0.00649248	1.00047		0.0128236	1.00681		0.00929913	0.999594		0.00723781	0.982829		0.00810295	1.00078		0.00813285	0.994805		0.0104707	0.99965		0.00661262	1.00309		0.0100923	0.986245
0.0121306	0.989245		0.0124371	1.01371		0.0144267	1.01959		0.00883484	0.982358		0.0166449	0.990618		0.0128281	1.00813		0.010011	0.990879		0.0146178	1.00121		0.01751	1.00422		0.0136708	1.00265		0.0109877	0.985034		0.0137258	0.997958		0.0118827	0.992742		0.0164063	0.999881		0.0138033	0.999882		0.0150896	0.988027
0.0165051	0.992964		0.0164998	0.999312		0.0188022	1.02199		0.0166473	0.986216		0.0203948	0.988877		0.0178291	1.01274		0.0159486	0.987239		0.0202445	0.991225		0.0212617	1.01702		0.0177372	0.99672		0.0159849	0.996679		0.0171667	0.986982		0.016571	0.993128		0.0198472	0.997703		0.0219248	1.00571		0.0188432	0.99087
0.0227555	0.990963		0.0236867	0.993579		0.0259891	1.01971		0.024147	0.984068		0.0253959	0.978354		0.0212662	1.01495		0.0240739	0.98379		0.0239943	0.983426		0.027823	1.00465		0.0246113	0.984936		0.0234846	0.989095		0.0227895	0.990071		0.0240707	0.990183		0.0251573	0.991353		0.0266131	0.999167		0.0250917	0.995364
0.030568	0.997266		0.0311863	1.0009		0.0338016	1.01125		0.0282097	0.975218		0.0328956	0.988654		0.0278275	1.00837		0.0306371	0.977417		0.029621	0.989175		0.0353227	1.00213		0.0317982	0.991229		0.0303625	0.982748		0.030602	0.989742		0.0309447	0.979056		0.0329698	0.991424		0.0303629	1.00729		0.0325914	0.993339
0.0368184	0.986642		0.0361874	1.00057		0.0384898	0.99833		0.0325851	0.99056		0.0394568	0.989565		0.03564	1.00811		0.0340741	0.979858		0.0374335	0.985445		0.0409475	0.991488		0.0371083	0.990193		0.0350508	0.985614		0.0368505	0.985988		0.035633	0.970399		0.0392182	0.993305		0.036928	0.998121		0.0385271	0.974527
0.0411929	0.972231		0.0405629	0.996927		0.0422397	0.996694		0.039772	0.981623		0.0441451	0.989222		0.0409538	0.994326		0.0390733	0.988289		0.0433692	0.981766		0.0453229	0.988684		0.0414875	0.986732		0.0397352	0.990122		0.0412298	0.982312		0.0403175	0.97886		0.0435975	0.985899		0.0444277	0.988174		0.0425935	0.979587
0.0468177	0.972223		0.047437	0.990463		0.048801	1.0024		0.0469627	0.968233		0.0491443	0.979786		0.0453293	0.980049		0.0468858	0.982503		0.0477446	0.98615		0.0512605	0.985126		0.0480488	0.989928		0.0469221	0.983163		0.0468526	0.973711		0.0475082	0.986151		0.0489076	0.982496		0.0500506	0.982654		0.0485292	0.979153
0.0546302	0.970439		0.0552495	0.98453		0.0566135	0.987856		0.05196	0.973842		0.0566459	0.976045		0.0515778	0.994515		0.053449	0.963082		0.0533675	0.992639		0.059073	0.99202		0.0558613	0.985497		0.0544256	0.975721		0.0543523	0.974307		0.0553207	0.974409		0.0564073	0.986841		0.054426	0.985848		0.0563417	0.978529
0.0615052	0.964193		0.0611889	0.98385		0.0619273	0.987127		0.0563355	0.960215		0.0641456	0.969112		0.0597031	0.993603		0.0581372	0.965996		0.06118	0.977825		0.0656362	0.987498		0.061797	0.980742		0.0597357	0.975753		0.0615392	0.972433		0.0606307	0.970275		0.063907	0.980354		0.0603655	0.987073		0.062903	0.965986
0.0655679	0.961107		0.0652516	0.991151		0.0663009	0.976365		0.0632095	0.965587		0.0691447	0.958267		0.0659515	0.980214		0.0631364	0.968237		0.0683707	0.97063		0.0700117	0.965926		0.0661686	0.970766		0.0641111	0.9737		0.0662313	0.966301		0.0650062	0.957632		0.068599	0.965131		0.0684908	0.972558		0.0672746	0.958712
0.0711926	0.951769		0.0715001	0.978377		0.0725513	0.980629		0.071022	0.971207		0.0735202	0.961517		0.070327	0.983261		0.0706361	0.959771		0.0727461	0.968737		0.0753236	0.961605		0.0721119	0.963977		0.0709852	0.966963		0.0709158	0.95309		0.0715675	0.965968		0.0729707	0.963293		0.0750521	0.974096		0.0725923	0.956541
0.0793179	0.95346		0.0796254	0.954037		0.0803638	0.973378		0.0766487	0.955344		0.0807071	0.957476		0.0756409	0.977177		0.0781358	0.950254		0.0774306	0.959911		0.0831361	0.964467		0.0802372	0.955233		0.0791105	0.952927		0.0784154	0.962057		0.0796928	0.956508		0.0804704	0.963829		0.0791148	0.963341		0.0804048	0.950862
0.086193	0.946226		0.0858738	0.954795		0.0866141	0.963273		0.0810242	0.931878		0.0885196	0.946317		0.0834534	0.970962		0.0831369	0.937104		0.0852431	0.951235		0.0900102	0.953719		0.0864857	0.941575		0.0844244	0.944203		0.0859151	0.95494		0.0853194	0.944514		0.0879701	0.96469		0.0844248	0.973815		0.0875917	0.962036
0.0899428	0.937347		0.0899365	0.955818		0.0909896	0.959863		0.0872726	0.93068		0.0938334	0.933734		0.0903274	0.951903		0.0875104	0.934746		0.0927428	0.934168		0.0943857	0.950457		0.0908574	0.934709		0.0884871	0.944625		0.0905996	0.931254		0.0893821	0.927008		0.0929673	0.940412		0.0925501	0.964843		0.0922761	0.943529
0.0946301	0.92763		0.0961888	0.961998		0.0963016	0.949533		0.0950851	0.936749		0.0978942	0.935957		0.0947029	0.940992		0.0943864	0.939914		0.097431	0.921821		0.0996976	0.938701		0.0964878	0.936911		0.0953611	0.938624		0.0952917	0.925113		0.0962562	0.918983		0.0976594	0.928108		0.099428	0.95001		0.0969682	0.914548
0.101818	0.922759		0.104314	0.938871		0.104427	0.942402		0.101337	0.922683		0.10477	0.930429		0.100017	0.929338		0.102199	0.915307		0.102119	0.923384		0.107823	0.932698		0.1043	0.927762		0.103486	0.926288		0.102791	0.921425		0.104381	0.920927		0.104846	0.931026		0.1038	0.936647		0.104781	0.915626
0.108693	0.913271		0.110563	0.921575		0.111301	0.923375		0.1054	0.919941		0.112895	0.9122		0.107829	0.927434		0.107511	0.898982		0.109619	0.914874		0.114699	0.921132		0.110862	0.906293		0.1088	0.909707		0.110291	0.916296		0.110008	0.90642		0.112659	0.919444		0.109114	0.922548		0.11228	0.907091
0.113693	0.899961		0.114312	0.919737		0.115676	0.909342		0.111649	0.918309		0.117895	0.892257		0.115016	0.922714		0.111574	0.899385		0.117119	0.903207		0.118449	0.901576		0.114608	0.896546		0.112237	0.90022		0.114976	0.914148		0.113445	0.895997		0.117343	0.900119		0.116926	0.914959		0.116339	0.893684
0.11838	0.896819		0.119313	0.91283		0.120988	0.897861		0.119774	0.904656		0.121644	0.887345		0.119079	0.91638		0.11876	0.897744		0.121807	0.890972		0.123135	0.898215		0.119613	0.897495		0.118486	0.898257		0.118729	0.892857		0.119381	0.891127		0.121097	0.902417		0.1238	0.901311		0.120719	0.894624
0.125568	0.880346		0.126813	0.891851		0.129114	0.893156		0.12571	0.887912		0.127895	0.88808		0.123454	0.907935		0.126886	0.895423		0.125557	0.886045		0.130637	0.90004		0.127425	0.882424		0.125986	0.882713		0.125603	0.883127		0.126881	0.888684		0.127658	0.895643		0.127863	0.883484		0.127905	0.892759
0.133381	0.864062		0.133687	0.884388		0.13599	0.878336		0.129459	0.876826		0.135707	0.876953		0.130954	0.898217		0.131887	0.880564		0.132431	0.880302		0.137511	0.884706		0.133986	0.867496		0.131925	0.86018		0.13279	0.878715		0.13282	0.867115		0.135471	0.875899		0.132551	0.888172		0.135092	0.866642
0.138381	0.852548		0.138063	0.881092		0.140052	0.862155		0.134773	0.870541		0.141332	0.858844		0.137828	0.873737		0.135324	0.85495		0.139618	0.864261		0.142199	0.8546		0.138358	0.859771		0.1363	0.850216		0.1381	0.85788		0.137195	0.865467		0.140781	0.854943		0.139738	0.865382		0.14009	0.854889
0.142755	0.848381		0.143064	0.867637		0.144426	0.856206		0.142273	0.860438		0.145708	0.844407		0.142516	0.860091		0.141574	0.843407		0.144932	0.849182		0.146885	0.854059		0.143363	0.850805		0.142236	0.85089		0.142792	0.846355		0.142818	0.868663		0.14516	0.847207		0.146925	0.853049		0.144469	0.85072
0.14963	0.830415		0.150876	0.854083		0.151615	0.847849		0.148834	0.838219		0.151332	0.835745		0.147205	0.858974		0.149387	0.825645		0.149307	0.837743		0.154074	0.836836		0.150863	0.843094		0.150049	0.849423		0.149354	0.83482		0.150318	0.83279		0.151408	0.842547		0.151613	0.838047		0.151343	0.831304
0.157756	0.81226		0.158376	0.833468		0.158802	0.82863		0.153522	0.815561		0.159145	0.824698		0.154391	0.846777		0.155324	0.8119		0.155868	0.820718		0.161887	0.820677		0.158362	0.820619		0.15661	0.822604		0.157166	0.819707		0.157505	0.820689		0.159221	0.828537		0.156301	0.832265		0.159155	0.812755
0.163068	0.800106		0.163064	0.814092		0.16349	0.812958		0.158524	0.812671		0.166021	0.796116		0.162204	0.840239		0.159387	0.805243		0.163681	0.810687		0.167199	0.807654		0.163359	0.802981		0.160985	0.803465		0.163415	0.794779		0.162193	0.803491		0.165469	0.805861		0.163175	0.818177		0.164778	0.798965
0.16713	0.787949		0.167749	0.797169		0.168176	0.802013		0.166023	0.806779		0.170394	0.780936		0.167514	0.82009		0.165325	0.791679		0.169933	0.789452		0.171261	0.792585		0.167731	0.790074		0.166299	0.795675		0.167481	0.778483		0.166881	0.787766		0.169849	0.785622		0.171301	0.799207		0.168837	0.78329
0.174005	0.778186		0.174939	0.790754		0.175052	0.787964		0.173523	0.778075		0.175708	0.769267		0.171577	0.800434		0.173448	0.775694		0.173996	0.777055		0.177823	0.776423		0.174613	0.774844		0.174112	0.781912		0.173104	0.77077		0.174381	0.771316		0.175472	0.776871		0.176927	0.784904		0.175093	0.770494
0.182131	0.761674		0.182752	0.77323		0.182865	0.771612		0.178211	0.767541		0.183521	0.762477		0.178142	0.780369		0.180011	0.753514		0.179932	0.762802		0.185948	0.764195		0.182738	0.760813		0.181299	0.757984		0.181229	0.767247		0.182194	0.759423		0.183284	0.759267		0.18099	0.77334		0.183219	0.752387
0.187443	0.734919		0.187749	0.750676		0.188489	0.747261		0.182899	0.760415		0.190708	0.731237		0.186267	0.772527		0.184387	0.734914		0.187744	0.74395		0.191886	0.739634		0.188048	0.74408		0.185674	0.743856		0.18779	0.740875		0.186882	0.737675		0.190158	0.742273		0.187239	0.759877		0.189467	0.740294
0.191193	0.724514		0.192125	0.732429		0.192552	0.74089		0.190086	0.743978		0.195083	0.716708		0.192203	0.752687		0.189699	0.724171		0.194305	0.718769		0.195948	0.736867		0.192107	0.733972		0.190362	0.735987		0.191857	0.724128		0.191257	0.724767		0.194217	0.728977		0.195677	0.741944		0.193526	0.720995
0.19713	0.715839		0.198999	0.735018		0.199113	0.722551		0.197899	0.729154		0.200082	0.716365		0.196265	0.732184		0.197511	0.707348		0.198681	0.701296		0.202199	0.72708		0.198981	0.717743		0.198175	0.71783		0.19748	0.713368		0.19907	0.712043		0.199535	0.710793		0.201612	0.714445		0.199469	0.714599
0.204943	0.696356		0.207124	0.710748		0.207239	0.706084		0.2029	0.71241		0.207895	0.701167		0.202827	0.724064		0.204387	0.693779		0.204307	0.697753		0.210324	0.707922		0.207106	0.691366		0.205675	0.695351		0.205605	0.699535		0.20657	0.70107		0.20766	0.6963		0.205362	0.697303		0.207587	0.697919
0.21088	0.676485		0.211812	0.684749		0.213176	0.691701		0.207272	0.692823		0.215082	0.677234		0.210952	0.706512		0.208761	0.675981		0.212433	0.689294		0.216261	0.687576		0.212111	0.674468		0.21005	0.673972		0.212166	0.663476		0.210945	0.677402		0.214847	0.67798		0.211614	0.688254		0.213843	0.671294
0.215256	0.657872		0.215562	0.671339		0.217239	0.670112		0.214462	0.672562		0.219144	0.652923		0.216579	0.673849		0.214074	0.666988		0.218994	0.666364		0.220011	0.66343		0.215857	0.665914		0.214113	0.661893		0.215912	0.654615		0.215008	0.665781		0.218593	0.657281		0.220053	0.676194		0.217589	0.651494
0.22088	0.65268		0.222127	0.663923		0.223489	0.651947		0.222275	0.653634		0.22352	0.649523		0.220329	0.657341		0.221887	0.647306		0.222744	0.642459		0.225636	0.644574		0.222113	0.660596		0.2213	0.654157		0.220917	0.653463		0.221882	0.658269		0.223285	0.647815		0.225988	0.64691		0.222907	0.631747
0.22838	0.63708		0.229627	0.643023		0.231615	0.635225		0.227272	0.628769		0.230396	0.644137		0.225951	0.643067		0.229074	0.623859		0.227432	0.628852		0.233136	0.635406		0.229613	0.637728		0.228486	0.634671		0.228417	0.633351		0.229069	0.636993		0.230472	0.630551		0.229425	0.624384		0.230406	0.625002
0.235568	0.610959		0.235563	0.616398		0.237552	0.624158		0.230709	0.624019		0.237583	0.621881		0.233764	0.622943		0.233136	0.608062		0.234932	0.618404		0.239386	0.621134		0.235549	0.609		0.233488	0.611416		0.235291	0.607399		0.234383	0.605179		0.237659	0.610383		0.235052	0.627168		0.236968	0.607442
0.239943	0.597085		0.239625	0.607466		0.241302	0.601282		0.237274	0.61686		0.242582	0.595583		0.240016	0.618421		0.237512	0.601368		0.241806	0.597882		0.243762	0.600398		0.23992	0.599435		0.237863	0.600688		0.239975	0.585739		0.238758	0.593469		0.242343	0.58867		0.242552	0.610027		0.241339	0.5876
0.244943	0.579734		0.245565	0.601032		0.246927	0.587548		0.244774	0.594279		0.246957	0.585152		0.244392	0.599721		0.244699	0.587508		0.246494	0.574414		0.249074	0.590162		0.245551	0.583859		0.244737	0.59133		0.244668	0.570636		0.245319	0.599154		0.247035	0.579704		0.2488	0.58603		0.246649	0.580643
0.252443	0.569031		0.253686	0.580226		0.254426	0.56627		0.250397	0.577843		0.253833	0.575137		0.249702	0.576135		0.251886	0.573167		0.251182	0.569515		0.256886	0.573066		0.253363	0.57254		0.252862	0.571629		0.251854	0.555862		0.253132	0.584215		0.254222	0.561985		0.253176	0.565843		0.254157	0.564366
0.259943	0.544187		0.260251	0.55822		0.260677	0.55593		0.255085	0.553961		0.261957	0.554572		0.257201	0.559864		0.256574	0.54553		0.258369	0.556973		0.264073	0.542535		0.260238	0.554755		0.258485	0.547831		0.259354	0.548568		0.25938	0.556022		0.261722	0.543257		0.258489	0.564011		0.261656	0.540617
0.26463	0.52683		0.264314	0.54216		0.265052	0.541088		0.261024	0.540344		0.267583	0.531063		0.264392	0.545762		0.260949	0.534449		0.266182	0.54031		0.268448	0.527024		0.264609	0.527798		0.262548	0.529277		0.264664	0.534276		0.263443	0.528049		0.267032	0.530331		0.266302	0.545103		0.266341	0.524645
0.269318	0.516641		0.269624	0.538289		0.270364	0.523881		0.268837	0.535292		0.271646	0.511684		0.269077	0.532232		0.267824	0.520258		0.271183	0.516781		0.273448	0.519433		0.269919	0.512987		0.2688	0.51232		0.269044	0.512768		0.269382	0.516408		0.271411	0.514578		0.273489	0.528939		0.270712	0.515827
0.276818	0.507209		0.277749	0.524309		0.277864	0.511122		0.275398	0.518212		0.277894	0.503287		0.273765	0.524063		0.275949	0.504244		0.275558	0.499775		0.280949	0.505955		0.277732	0.507979		0.276925	0.509988		0.275605	0.505613		0.277508	0.505154		0.277972	0.509465		0.278177	0.503735		0.277899	0.503104
0.284318	0.483643		0.284936	0.499029		0.285051	0.495354		0.279774	0.505326		0.28602	0.492531		0.281264	0.506229		0.281574	0.488454		0.282432	0.498549		0.288449	0.492478		0.284919	0.489022		0.282861	0.482771		0.28373	0.482826		0.283756	0.482452		0.286098	0.49264		0.282865	0.491736		0.285712	0.480993
0.289005	0.467255		0.289312	0.473888		0.289739	0.477475		0.285088	0.480819		0.291957	0.469456		0.288764	0.486661		0.285636	0.47019		0.290558	0.476215		0.293135	0.468099		0.289298	0.469839		0.286924	0.466501		0.289353	0.46029		0.288132	0.468576		0.291721	0.468825		0.290365	0.481307		0.290717	0.458585
0.292756	0.448396		0.294313	0.469892		0.294427	0.463118		0.293209	0.470253		0.29602	0.453777		0.293765	0.464897		0.292199	0.463346		0.295868	0.44656		0.297511	0.45649		0.294295	0.454821		0.292863	0.456136		0.293107	0.449359		0.293758	0.461015		0.295779	0.451853		0.298178	0.46394		0.295088	0.451205
0.29963	0.434402		0.302125	0.454421		0.301927	0.455283		0.300087	0.446612		0.30227	0.444624		0.298141	0.455423		0.300012	0.441169		0.29993	0.434143		0.30501	0.445933		0.302108	0.44351		0.300985	0.446012		0.299981	0.437975		0.301884	0.448287		0.302036	0.439624		0.302866	0.448927		0.302275	0.440435
0.307131	0.421639		0.309312	0.436307		0.309427	0.433363		0.304462	0.429522		0.310709	0.428344		0.30564	0.445527		0.30595	0.422905		0.306808	0.43138		0.312823	0.424647		0.309295	0.424984		0.307237	0.4117		0.308106	0.426038		0.308445	0.425187		0.310161	0.422605		0.30755	0.442426		0.310088	0.425995
0.312443	0.409506		0.313375	0.418229		0.314426	0.418411		0.30946	0.420983		0.316644	0.405989		0.313453	0.422854		0.310012	0.407515		0.315243	0.409991		0.317511	0.412065		0.313361	0.40662		0.310987	0.399245		0.313416	0.404024		0.312195	0.411034		0.315784	0.405892		0.314737	0.428373		0.315093	0.409408
0.316818	0.396088		0.31775	0.400946		0.318801	0.404941		0.317585	0.40901		0.320083	0.397338		0.318141	0.400108		0.316261	0.397538		0.320557	0.389947		0.321261	0.396397		0.31742	0.394297		0.315988	0.394621		0.317162	0.39195		0.317196	0.400087		0.31953	0.390115		0.32255	0.405853		0.318839	0.398038
0.32338	0.382721		0.324937	0.393544		0.326301	0.387356		0.324772	0.387351		0.325708	0.395086		0.321891	0.390946		0.324386	0.383958		0.323994	0.380755		0.327824	0.382955		0.324607	0.392244		0.3238	0.377452		0.322793	0.381407		0.324695	0.389762		0.32516	0.388192		0.327238	0.384067		0.325087	0.382533
0.331193	0.36677		0.332124	0.383267		0.334114	0.369759		0.328835	0.367701		0.333208	0.378684		0.328452	0.38444		0.330324	0.364099		0.329933	0.366557		0.335324	0.37609		0.331794	0.3681		0.330362	0.365747		0.330605	0.365269		0.331257	0.36522		0.332973	0.375521		0.331301	0.371259		0.3329	0.367728
0.337443	0.350728		0.337125	0.366011		0.338802	0.350081		0.33321	0.364848		0.339458	0.360772		0.335952	0.365186		0.333761	0.349844		0.337746	0.355873		0.340636	0.360731		0.336799	0.347506		0.334737	0.35339		0.336541	0.34631		0.335945	0.353512		0.339221	0.355549		0.337866	0.359222		0.33853	0.350271
0.341506	0.338328		0.341501	0.344004		0.342552	0.336061		0.34071	0.353492		0.344144	0.338616		0.341579	0.354173		0.339387	0.345846		0.343681	0.340589		0.345011	0.34023		0.34117	0.336753		0.340047	0.341399		0.340912	0.340674		0.340946	0.351551		0.343593	0.340214		0.345365	0.344992		0.342589	0.342794
0.347443	0.328918		0.348375	0.331669		0.349115	0.329967		0.347588	0.333311		0.349145	0.334497		0.345954	0.337747		0.346887	0.328333		0.348057	0.331147		0.351573	0.329536		0.348044	0.339278		0.347238	0.332685		0.346543	0.320004		0.348133	0.336795		0.348911	0.326902		0.350675	0.328478		0.348525	0.334484
0.355256	0.316455		0.3565	0.316908		0.356615	0.319178		0.352585	0.320713		0.356645	0.321434		0.352203	0.325929		0.353448	0.313704		0.353683	0.319397		0.359385	0.314576		0.35617	0.321642		0.354738	0.317321		0.354355	0.308845		0.355633	0.319568		0.356723	0.31998		0.355051	0.325128		0.35665	0.316152
0.361818	0.29927		0.362127	0.311363		0.362239	0.302805		0.357273	0.306447		0.364145	0.306027		0.360015	0.306388		0.357824	0.302766		0.361496	0.303171		0.365635	0.296131		0.3618	0.299389		0.359735	0.299385		0.361229	0.296488		0.36063	0.307058		0.36391	0.29915		0.361303	0.313108		0.363219	0.299253
0.366193	0.284964		0.366189	0.297596		0.366615	0.293171		0.364147	0.300461		0.368833	0.288052		0.366267	0.29522		0.362825	0.287745		0.36837	0.28762		0.369698	0.282505		0.365859	0.285511		0.36411	0.287303		0.365601	0.276763		0.365005	0.28977		0.368282	0.281692		0.369425	0.291944		0.367278	0.280875
0.371818	0.273693		0.372438	0.288351		0.372863	0.275454		0.372272	0.290205		0.373209	0.275459		0.370639	0.286689		0.370637	0.277843		0.372745	0.272286		0.375323	0.275968		0.372107	0.272899		0.371297	0.274043		0.370606	0.263919		0.371883	0.280961		0.373287	0.272332		0.375677	0.271833		0.372588	0.26809
0.379943	0.261258		0.380876	0.267651		0.380676	0.257913		0.377899	0.268534		0.380708	0.274072		0.376266	0.276976		0.377824	0.260751		0.377743	0.255878		0.383448	0.262473		0.380233	0.262663		0.37911	0.260554		0.378419	0.252543		0.380009	0.265329		0.380786	0.269113		0.37974	0.260864		0.380713	0.255086
0.386506	0.241525		0.386811	0.249658		0.386926	0.250667		0.381962	0.254121		0.388521	0.253662		0.384078	0.262401		0.38251	0.244039		0.385555	0.249675		0.390011	0.24459		0.386481	0.249142		0.384424	0.240673		0.385918	0.241178		0.385631	0.244975		0.388286	0.249392		0.385362	0.253116		0.387587	0.238262
0.390256	0.227557		0.390561	0.232169		0.391302	0.231942		0.388523	0.250071		0.39352	0.237022		0.390952	0.24468		0.387199	0.238262		0.393059	0.233724		0.394074	0.229675		0.390548	0.235534		0.388486	0.231599		0.39029	0.227041		0.389694	0.234056		0.39297	0.233141		0.393488	0.243031		0.391966	0.223413
0.395256	0.218811		0.396814	0.231159		0.396926	0.223128		0.396648	0.237841		0.397895	0.223708		0.395015	0.226597		0.394386	0.225395		0.39743	0.214471		0.399699	0.221568		0.396483	0.226359		0.395673	0.228552		0.394982	0.215703		0.396568	0.229359		0.397342	0.223225		0.400366	0.225933		0.396964	0.216006
0.402756	0.210063		0.405252	0.218755		0.405052	0.209128		0.402275	0.220983		0.405082	0.21343		0.400642	0.219999		0.402198	0.211883		0.402431	0.207879		0.407824	0.207092		0.404609	0.210312		0.403798	0.209402		0.402794	0.204745		0.404694	0.216661		0.404849	0.209358		0.404428	0.207892		0.404776	0.20813
0.409631	0.193522		0.411187	0.20374		0.411615	0.192676		0.406338	0.207249		0.412895	0.199079		0.408767	0.208968		0.407199	0.200418		0.410244	0.199606		0.414385	0.191056		0.410857	0.195769		0.4088	0.19154		0.410294	0.193505		0.410007	0.192988		0.412662	0.189805		0.409738	0.200401		0.412276	0.190421
0.414318	0.181864		0.414624	0.185607		0.415988	0.178335		0.412899	0.198937		0.417896	0.183221		0.415641	0.185088		0.411575	0.191112		0.417431	0.181154		0.418135	0.174861		0.414611	0.183553		0.412237	0.17778		0.414666	0.174479		0.413444	0.184214		0.417033	0.175243		0.417864	0.189607		0.416342	0.174027
0.419318	0.171987		0.420251	0.179015		0.421302	0.171614		0.421024	0.178834		0.421646	0.174756		0.419391	0.172836		0.418762	0.174051		0.421806	0.163512		0.423136	0.167063		0.419921	0.175539		0.418485	0.176322		0.418419	0.162264		0.419693	0.18109		0.420779	0.170027		0.424738	0.174802		0.420714	0.166853
0.426506	0.162857		0.427751	0.165792		0.429426	0.161326		0.426647	0.16105		0.428207	0.166411		0.424079	0.169054		0.426887	0.157219		0.425869	0.153908		0.430636	0.160315		0.42742	0.157819		0.426298	0.161536		0.425294	0.160107		0.427193	0.168905		0.427661	0.163452		0.428488	0.156497		0.427901	0.159356
0.434318	0.149227		0.434312	0.149469		0.436302	0.146473		0.430397	0.151956		0.435709	0.154733		0.431892	0.16008		0.431573	0.143734		0.432743	0.147786		0.43751	0.147549		0.433982	0.144054		0.431924	0.145422		0.432793	0.145355		0.433132	0.155621		0.435161	0.1495		0.433176	0.148743		0.435088	0.143989
0.439318	0.13389		0.438688	0.13928		0.440052	0.135514		0.436024	0.147231		0.44102	0.140561		0.438766	0.144249		0.435323	0.136779		0.440243	0.13267		0.442198	0.134827		0.438361	0.139891		0.4363	0.130338		0.438103	0.133889		0.437508	0.14182		0.440471	0.137523		0.440676	0.142943		0.440093	0.13267
0.443693	0.128339		0.444001	0.128562		0.44474	0.127097		0.443523	0.136456		0.445396	0.12991		0.443454	0.132026		0.441886	0.129554		0.445244	0.121156		0.446887	0.122729		0.443358	0.132353		0.442235	0.126597		0.442475	0.122237		0.44313	0.134914		0.445155	0.122897		0.44755	0.130583		0.444464	0.124798
0.450568	0.121337		0.451501	0.123941		0.45224	0.116151		0.449772	0.121374		0.451644	0.121869		0.448142	0.121707		0.449386	0.119499		0.449619	0.115139		0.454073	0.113779		0.450858	0.120759		0.450048	0.113734		0.449044	0.112583		0.450943	0.123811		0.451412	0.119181		0.452238	0.118623		0.451338	0.116825
0.458693	0.104159		0.459001	0.112018		0.459114	0.10673		0.45446	0.114785		0.459457	0.112357		0.455329	0.110896		0.454698	0.110835		0.456493	0.107964		0.461886	0.106158		0.458358	0.106653		0.456613	0.104109		0.457169	0.102898		0.457821	0.112327		0.459224	0.107909		0.456926	0.111181		0.459464	0.104967
0.464005	0.0920146		0.463689	0.0969613		0.463802	0.0948588		0.459774	0.106475		0.46602	0.100485		0.463142	0.102687		0.459073	0.101287		0.464306	0.0990942		0.467198	0.0950717		0.463363	0.0940621		0.460985	0.0949162		0.463105	0.0927328		0.462192	0.100872		0.465472	0.0946557		0.464113	0.101025		0.464781	0.0968372
0.468068	0.0834		0.468377	0.0900286		0.468488	0.0868131		0.467274	0.0964824		0.470083	0.0946309		0.468139	0.0927227		0.465324	0.0936526		0.470245	0.0893506		0.471573	0.0851022		0.467734	0.089243		0.466298	0.0879486		0.467164	0.0836054		0.467194	0.0926432		0.469844	0.0824813		0.471926	0.0907384		0.46884	0.0841419
0.474943	0.0772304		0.475564	0.0843313		0.475677	0.0823145		0.474461	0.0880365		0.475708	0.0869877		0.472514	0.0866764		0.473449	0.0843032		0.474308	0.0795869		0.478137	0.0783891		0.474921	0.0815098		0.474111	0.0837206		0.473107	0.078501		0.475006	0.0869719		0.475467	0.0790602		0.477239	0.0812927		0.475401	0.0800743
0.483068	0.0697779		0.483377	0.0757265		0.48349	0.0706833		0.479149	0.0765909		0.48352	0.0808167		0.479392	0.0807003		0.479699	0.072311		0.480556	0.0739308		0.48626	0.072294		0.482734	0.0725785		0.481298	0.0729958		0.481225	0.0735371		0.482193	0.0762894		0.483592	0.0733884		0.481615	0.0755982		0.483527	0.0728806
0.488693	0.0636368		0.488374	0.0653082		0.488489	0.0604846		0.48415	0.0676389		0.490396	0.0701406		0.487514	0.072684		0.484073	0.0644073		0.488682	0.0651733		0.491574	0.0615978		0.488044	0.0622623		0.485673	0.0613918		0.487481	0.0629383		0.486881	0.0632329		0.490161	0.062319		0.488176	0.0677397		0.489462	0.0614893
0.49213	0.0561487		0.492749	0.0597663		0.492864	0.0567885		0.491337	0.0645625		0.49477	0.0606243		0.49314	0.0604857		0.489387	0.0590745		0.49493	0.0565338		0.495636	0.0553976		0.49211	0.0570066		0.490674	0.054732		0.491852	0.0511307		0.491882	0.0592194		0.49422	0.0557188		0.495989	0.0618555		0.493216	0.0553355
0.498381	0.0520897		0.499936	0.0546291		0.499738	0.0543685		0.498837	0.0559409		0.499771	0.0581102		0.497203	0.0540753		0.497512	0.0549461		0.498993	0.0480444		0.502511	0.052345		0.499297	0.0521388		0.498487	0.0517376		0.497475	0.0490928		0.499382	0.057681		0.499843	0.0526704		0.501928	0.053758		0.499465	0.0522967
0.50588	0.0464166		0.507749	0.0498968		0.507864	0.0480654		0.503838	0.0476542		0.507896	0.053991		0.503764	0.0518457		0.504386	0.0466475		0.504932	0.047282		0.510636	0.0458383		0.507422	0.0462669		0.505987	0.0445251		0.505601	0.0461161		0.506882	0.0502145		0.507968	0.0470373		0.505991	0.0470685		0.507903	0.0443483
0.511818	0.0387197		0.512437	0.0400373		0.513177	0.0391727		0.508209	0.0439318		0.515083	0.0433462		0.51189	0.0466885		0.508449	0.0435581		0.513058	0.0413895		0.515948	0.0393774		0.512107	0.0395288		0.510049	0.0389168		0.512169	0.037291		0.511257	0.0426448		0.51453	0.0392102		0.512552	0.0425691		0.513838	0.0372296
0.516193	0.0342422		0.5165	0.0376957		0.517238	0.0354594		0.515713	0.0413649		0.519145	0.038599		0.517516	0.0373842		0.513761	0.0390291		0.519306	0.0322093		0.519698	0.0352448		0.51586	0.0326764		0.514112	0.0360649		0.515603	0.031636		0.51532	0.0382594		0.518283	0.0353362		0.520677	0.036147		0.517279	0.0334743
0.521818	0.033146		0.523065	0.0343158		0.524114	0.0326796		0.523525	0.0357453		0.523521	0.0359813		0.521266	0.0326384		0.521886	0.0343719		0.523056	0.0290613		0.525635	0.0329556		0.522422	0.0315393		0.521299	0.0333936		0.5206	0.0311794		0.522507	0.0346774		0.52328	0.0324331		0.5263	0.03045		0.522902	0.0319043
0.529631	0.0307453		0.530565	0.0295829		0.532239	0.0283368		0.52821	0.0315489		0.530708	0.0339623		0.527202	0.0307355		0.528762	0.0301412		0.528057	0.027926		0.533135	0.0268513		0.529921	0.0297848		0.528486	0.0294235		0.528412	0.0275108		0.529694	0.0304333		0.53078	0.0281199		0.529737	0.0274176		0.530715	0.0284621
0.536818	0.0256695		0.535875	0.02557		0.537864	0.0254332		0.53196	0.0273438		0.537582	0.0299318		0.535014	0.0291344		0.532823	0.0265761		0.535557	0.0246235		0.539385	0.022653		0.535544	0.0256873		0.533487	0.0238229		0.534981	0.0242991		0.534695	0.0256146		0.537662	0.0240659		0.535677	0.0263711		0.536963	0.0232148
0.541193	0.0202568		0.54025	0.0227025		0.541301	0.022699		0.538525	0.0237798		0.542583	0.0258792		0.540954	0.0247704		0.537198	0.0225606		0.542431	0.0217054		0.543761	0.0206451		0.539924	0.0229822		0.538175	0.0213479		0.539353	0.0198923		0.539383	0.0244407		0.542346	0.0213081		0.543176	0.0232967		0.541342	0.0214505
0.546193	0.0188906		0.546502	0.0226376		0.547239	0.0198388		0.546024	0.0208364		0.547269	0.0239624		0.545329	0.0216068		0.544387	0.0217351		0.546806	0.0196137		0.549386	0.0194164		0.545859	0.0218476		0.545049	0.021434		0.54435	0.019294		0.545944	0.0216897		0.547031	0.0200461		0.549425	0.019055		0.546652	0.019119
0.554006	0.0176387		0.554315	0.0202049		0.555051	0.0177409		0.551647	0.0181129		0.554145	0.0221311		0.550952	0.0191697		0.551261	0.0183236		0.551807	0.0163815		0.556885	0.0182074		0.553672	0.0189394		0.552862	0.0169519		0.55185	0.0173185		0.553757	0.0192826		0.554218	0.0177528		0.5538	0.0175875		0.554152	0.0170686
0.561193	0.0146474		0.560876	0.018024		0.560989	0.0156166		0.556023	0.0171891		0.561958	0.0203141		0.558765	0.0173536		0.55626	0.0159429		0.559307	0.0156932		0.564074	0.0158312		0.560233	0.0160971		0.558488	0.0151347		0.55935	0.0156785		0.559696	0.0170311		0.56203	0.0144756		0.559114	0.0169083		0.561339	0.0149962
0.565881	0.0132979		0.565252	0.013985		0.565364	0.0139466		0.562275	0.0148662		0.567583	0.0179889		0.565639	0.0137997		0.560949	0.0155083		0.566807	0.0140511		0.568448	0.0134406		0.564612	0.0130961		0.562547	0.0128722		0.564354	0.0124845		0.563755	0.014367		0.567035	0.0120564		0.566927	0.0153509		0.566031	0.0132112
0.570568	0.0120899		0.570562	0.0126038		0.570989	0.0131143		0.5704	0.0136793		0.571645	0.0151703		0.570014	0.0123245		0.567825	0.0143094		0.571808	0.0120193		0.573449	0.0116339		0.569922	0.0115895		0.568799	0.0127565		0.568726	0.011404		0.569694	0.0126752		0.571407	0.0115624		0.574114	0.0125389		0.570715	0.0124429
0.57838	0.0121596		0.578374	0.0104618		0.578802	0.0114158		0.576649	0.0111007		0.578208	0.0142782		0.575015	0.0116659		0.575637	0.0112564		0.576183	0.0104737		0.580948	0.0110841		0.578048	0.0103806		0.576925	0.0128064		0.5756	0.0112191		0.57782	0.0115447		0.577968	0.0114344		0.578489	0.0111547		0.578215	0.0105841
0.58588	0.00955638		0.585565	0.00943651		0.585989	0.00982427		0.580711	0.0108299		0.586332	0.0128341		0.582828	0.00992036		0.581262	0.0105068		0.58337	0.00957687		0.588448	0.00821858		0.584922	0.00870237		0.58286	0.0100736		0.583726	0.0103207		0.584381	0.0101072		0.586093	0.009807		0.58349	0.0114648		0.585715	0.00967992
0.589943	0.00769312		0.589936	0.00833448		0.590051	0.00915538		0.586334	0.0102734		0.592269	0.0111964		0.590327	0.00892984		0.585325	0.00948863		0.591183	0.00842686		0.593136	0.00774472		0.589301	0.00899839		0.58661	0.00800999		0.589043	0.0090484		0.588444	0.0090653		0.591724	0.00840476		0.59099	0.00992427		0.590712	0.0087539
0.594318	0.0069695		0.594938	0.00782303		0.595052	0.00878534		0.59446	0.00830431		0.596332	0.0118043		0.595016	0.00805267		0.591886	0.00910864		0.596493	0.00744102		0.597823	0.00760099		0.594298	0.00851869		0.592862	0.00824599		0.593102	0.00932952		0.594383	0.0090415		0.595783	0.00717952		0.59849	0.00835511		0.595091	0.00791294
0.601193	0.00750309		0.603063	0.00814244		0.602865	0.00748295		0.601337	0.00852618		0.602895	0.0108239		0.599704	0.00777821		0.600011	0.00709685		0.600555	0.00663226		0.605324	0.00767307		0.602424	0.00835475		0.601301	0.00699545		0.599976	0.00834561		0.602508	0.00824862		0.602344	0.00659425		0.603178	0.00717573		0.602278	0.00707006
0.60838	0.007172		0.609937	0.00776292		0.610364	0.00628307		0.6054	0.00603322		0.611021	0.0096087		0.607204	0.00674913		0.605949	0.00625528		0.607746	0.00627507		0.612824	0.00735429		0.60961	0.00654785		0.607236	0.00634958		0.608101	0.00644072		0.608757	0.00618004		0.610469	0.00601891		0.607862	0.00707312		0.610404	0.00726724
0.613693	0.00610262		0.614	0.00608023		0.61474	0.00733211		0.611023	0.00632492		0.616645	0.00819215		0.614703	0.00594845		0.610011	0.00613152		0.615559	0.0058862		0.617198	0.0063111		0.613356	0.005261		0.610986	0.0059712		0.613419	0.00543122		0.612507	0.00696335		0.616092	0.00503424		0.615366	0.00601036		0.615088	0.00645935
0.618068	0.00555858		0.618375	0.00504069		0.619426	0.00627741		0.619148	0.00553712		0.620395	0.00809452		0.619079	0.00481631		0.616575	0.00621178		0.620556	0.00573173		0.62126	0.00544895		0.617736	0.00557337		0.6163	0.00506064		0.616852	0.00551525		0.617508	0.00584724		0.619533	0.00387595		0.623178	0.00582134		0.618842	0.00585222
0.624631	0.00544559		0.625875	0.00497928		0.626926	0.00489434		0.626022	0.0045777		0.62602	0.00794961		0.623141	0.00395177		0.624698	0.00447384		0.624306	0.00439343		0.628136	0.00519668		0.625235	0.00542006		0.6238	0.00541464		0.623101	0.0057968		0.625008	0.00516105		0.625469	0.00378091		0.62755	0.00478945		0.625403	0.00477575
0.632755	0.00430394		0.632749	0.00497582		0.634738	0.00509452		0.629772	0.00432471		0.63352	0.00670775		0.630016	0.00463183		0.630012	0.0049776		0.630871	0.00447659		0.635323	0.00418931		0.63211	0.00467683		0.630361	0.0046732		0.630601	0.00569911		0.631569	0.0050057		0.633281	0.00472439		0.631613	0.00453714		0.632903	0.00478557
0.638381	0.00401137		0.63775	0.00370597		0.639114	0.00502658		0.63446	0.00438107		0.63977	0.00583059		0.637202	0.00478824		0.633762	0.0054098		0.63837	0.00403085		0.640635	0.00385123		0.637107	0.00453859		0.634736	0.00339828		0.636544	0.0042562		0.636257	0.00469968		0.639224	0.00436026		0.63849	0.00514459		0.638526	0.00432268
0.642443	0.00333507		0.642438	0.0039525		0.643177	0.00382104		0.64196	0.00435688		0.644145	0.00605037		0.642516	0.00417246		0.639386	0.00400118		0.643993	0.00380421		0.645323	0.00361118		0.641486	0.00362717		0.64005	0.00380082		0.640915	0.00387548		0.641258	0.00408255		0.643596	0.00296964		0.645677	0.00446074		0.642905	0.00409411
0.648693	0.0025423		0.649312	0.00422628		0.650051	0.00376786		0.648834	0.00287949		0.649457	0.00576776		0.646892	0.00324172		0.646886	0.00292796		0.648682	0.00390115		0.651887	0.00248239		0.648673	0.00278202		0.64755	0.00313035		0.646851	0.00419542		0.648758	0.00379184		0.649219	0.0035114		0.650987	0.00383973		0.649153	0.0030162
0.656818	0.00261897		0.657125	0.00350636		0.657552	0.00374704		0.653522	0.00240883		0.65727	0.00550945		0.653453	0.00359268		0.653449	0.00316353		0.654308	0.00216365		0.659699	0.00247767		0.656485	0.00332627		0.65505	0.00396628		0.654664	0.0041246		0.656258	0.00302127		0.657031	0.00367467		0.655363	0.00311878		0.656966	0.00312881
0.663068	0.0026995		0.662751	0.00308315		0.662551	0.00316388		0.658211	0.00291903		0.664457	0.00449722		0.661266	0.00354961		0.657823	0.00371928		0.662121	0.00236379		0.665637	0.00209583		0.661795	0.00300392		0.659738	0.00327079		0.661225	0.00281607		0.660946	0.00371193		0.663905	0.00329258		0.661928	0.00211732		0.663214	0.00250635
0.66713	0.00280038		0.666814	0.00244585		0.66724	0.00278596		0.665398	0.00250368		0.669145	0.00389939		0.667514	0.00266108		0.663137	0.0033693		0.668995	0.00267466		0.669699	0.00207352		0.665862	0.0026442		0.664422	0.00302702		0.665917	0.00212544		0.66563	0.00303615		0.668285	0.00260741		0.66974	0.00165645		0.667594	0.00256912
0.673068	0.00275306		0.673375	0.00222678		0.673801	0.00265231		0.67321	0.00230073		0.673833	0.00309009		0.671577	0.00191332		0.670949	0.00340823		0.673057	0.002897		0.675948	0.00202869		0.672423	0.00260024		0.671613	0.00258802		0.670914	0.00218366		0.672508	0.0028519		0.673282	0.00229038		0.675989	0.00241782		0.673216	0.00293953
0.681193	0.00260412		0.681501	0.00294129		0.681613	0.00274188		0.678524	0.00210557		0.68102	0.00314547		0.677516	0.0018062		0.678136	0.0028018		0.678367	0.00257039		0.684073	0.00222025		0.680549	0.0018551		0.679426	0.0027043		0.678727	0.00244281		0.680321	0.00274076		0.681094	0.00140287		0.680052	0.00198472		0.681029	0.00266448
0.687443	0.00200156		0.687436	0.00191364		0.687551	0.00295096		0.682899	0.00263659		0.688833	0.00335387		0.685329	0.0026478		0.682512	0.00365359		0.686493	0.00227653		0.690323	0.00207524		0.686484	0.00257115		0.684423	0.00212487		0.685914	0.0025887		0.685631	0.00284829		0.688594	0.000946652		0.685678	0.00183102		0.687903	0.00177321
0.691193	0.00242656		0.691499	0.00233123		0.691614	0.00291193		0.689461	0.00256341		0.693832	0.00295875		0.69189	0.00256145		0.687511	0.00387263		0.693684	0.0016955		0.694386	0.00232665		0.690863	0.00225538		0.688798	0.00209574		0.690293	0.00253858		0.690006	0.00146165		0.693286	0.000853085		0.6938	0.00195563		0.691962	0.00124826
0.696193	0.00201348		0.697751	0.00246185		0.697551	0.00251157		0.697586	0.0022469		0.698207	0.00271576		0.696265	0.00222121		0.6947	0.00238178		0.698055	0.00216365		0.700011	0.00195425		0.697112	0.00158542		0.695985	0.0019318		0.69529	0.00233553		0.697193	0.00169244		0.697971	0.000882021		0.700365	0.00129398		0.69728	0.00141023
0.704005	0.0026707		0.706189	0.00269541		0.705677	0.00239086		0.703213	0.00172639		0.705707	0.00290949		0.701892	0.00140853		0.702199	0.00189673		0.703056	0.00269836		0.708136	0.00148081		0.705237	0.00166781		0.703798	0.00133597		0.703103	0.00154145		0.705006	0.00223073		0.70547	0.00093398		0.704428	0.00135772		0.705405	0.00204179
0.710568	0.00219085		0.711812	0.00218894		0.71224	0.00165585		0.707272	0.00181072		0.71352	0.00269124		0.710017	0.00189211		0.707198	0.00190108		0.710869	0.00177801		0.714699	0.00126093		0.711173	0.00161642		0.708486	0.00138882		0.710602	0.00142158		0.710007	0.00232105		0.71297	0.00118659		0.71005	0.00178927		0.712279	0.00153433
0.714943	0.00197368		0.715249	0.00178021		0.716302	0.00142796		0.713837	0.00198864		0.718208	0.00133599		0.716579	0.00186597		0.711574	0.00225584		0.718056	0.00223452		0.718449	0.000868366		0.714606	0.00140555		0.712549	0.00207482		0.714356	0.00203073		0.713757	0.00198315		0.717349	0.00145187		0.718489	0.00130264		0.716338	0.00113614
0.719943	0.00224863		0.720876	0.00168874		0.721927	0.0013946		0.721962	0.00143007		0.721958	0.00194893		0.720016	0.00174149		0.719074	0.00209684		0.722118	0.00189542		0.723448	0.00100094		0.720237	0.00131191		0.71911	0.00260571		0.718728	0.00198338		0.720318	0.00101219		0.721408	0.00119778		0.72505	0.00141369		0.720717	0.00179189
0.727443	0.00216261		0.728688	0.00224841		0.730052	0.00140794		0.727585	0.000852786		0.728521	0.00260959		0.725017	0.00163886		0.726886	0.00279463		0.726494	0.0012894		0.730948	0.00131413		0.727736	0.00123504		0.72661	0.00261607		0.725915	0.00172061		0.727817	0.00123108		0.728282	0.00146982		0.7288	0.00128154		0.728217	0.00157339
0.734943	0.00134526		0.734937	0.00239632		0.736614	0.0014223		0.731022	0.00140484		0.736021	0.00195965		0.732516	0.00176184		0.731574	0.00249467		0.733681	0.00168645		0.737824	0.000847558		0.733985	0.00106685		0.731923	0.0016794		0.733101	0.00183216		0.733444	0.00129802		0.735469	0.00112534		0.733801	0.00133373		0.735091	0.0012739
0.739943	0.00166662		0.739312	0.00280591		0.740364	0.00111758		0.736961	0.0010551		0.741333	0.00157985		0.739391	0.000677698		0.735324	0.0023733		0.740867	0.00151173		0.742198	0.00134095		0.738356	0.00113374		0.736299	0.00108465		0.738106	0.00122578		0.73782	0.00135582		0.740787	0.0008383		0.7413	0.000802017		0.740088	0.001099
0.744631	0.00186014		0.744626	0.00284916		0.745365	0.000801131		0.744461	0.0015285		0.745708	0.00122544		0.744079	0.000404948		0.741885	0.00180494		0.745869	0.000962362		0.747199	0.0018219		0.743674	0.000829444		0.742547	0.00105424		0.742478	0.00135674		0.743755	0.00141299		0.745158	0.00148144		0.747865	0.000865761		0.74478	0.000364656
0.751506	0.00208392		0.752439	0.00316425		0.752864	0.000833079		0.75071	0.00119663		0.751958	0.00164202		0.74908	0.000626062		0.749387	0.00124875		0.750244	0.000972272		0.754386	0.00138793		0.751174	0.000597557		0.75036	0.00069851		0.749039	0.00177713		0.751568	0.00162699		0.75172	0.00129663		0.75255	0.00173907		0.751654	0.000749677
0.75963	0.00218003		0.759626	0.00167187		0.759738	0.00120877		0.755085	0.00089022		0.759771	0.00171798		0.756267	0.000842034		0.754699	0.00191217		0.757118	0.00115475		0.762198	0.00122747		0.758674	0.000686107		0.756612	0.00156226		0.757165	0.00163274		0.758133	0.00110782		0.759845	0.000288093		0.757238	0.00209533		0.759467	0.000578131
0.764943	0.0015705		0.764314	0.00196792		0.764114	0.00150884		0.760712	0.00137329		0.766019	0.00142071		0.764079	0.001142		0.759075	0.00163745		0.764931	0.00155503		0.767199	0.000503472		0.763358	0.000934558		0.760988	0.00108875		0.762787	0.00152417		0.762196	0.00115415		0.765781	0.000289572		0.764425	0.00157805		0.764777	0.000875462
0.769006	0.00169542		0.769002	0.00203107		0.769115	0.00135739		0.768211	0.00150074		0.770395	0.00150104		0.769077	0.000940593		0.765323	0.00151064		0.770557	0.00137083		0.771262	0.000576193		0.767737	0.00089676		0.766611	0.000884463		0.767167	0.00112617		0.767506	0.000681736		0.769847	0.000457696		0.772238	0.00132396		0.768843	0.00110187
0.776193	0.000640161		0.776502	0.00173545		0.776615	0.00176362		0.775398	0.00109527		0.77602	0.00146777		0.773452	0.000713908		0.773448	0.0016281		0.774933	0.0011332		0.778449	0.000346231		0.775237	0.00112759		0.774423	0.000989735		0.773415	0.00150881		0.775631	0.00081413		0.775783	0.00149348		0.777551	0.000630997		0.775405	0.000932005
0.784318	0.000905947		0.784002	0.00189937		0.784114	0.00159781		0.780087	0.000751419		0.783832	0.00167683		0.78033	0.00109507		0.779699	0.00198025		0.781181	0.00136329		0.786261	0.00056225		0.783049	0.00110805		0.781297	0.000861812		0.78154	0.00156512		0.782505	0.00100305		0.783908	0.00155558		0.781927	0.00116338		0.78353	0.000893192
0.789318	0.00063906		0.788999	0.00174713		0.789114	0.00136851		0.785088	0.000671293		0.790708	0.00158335		0.788451	0.00124377		0.783761	0.00210511		0.789307	0.00105392		0.791573	0.000881237		0.788047	0.000897397		0.78536	0.00096126		0.787476	0.00146381		0.78688	0.00123086		0.790157	0.000578087		0.788488	0.00132752		0.789153	0.000311227
0.792756	0.00121667		0.793374	0.002078		0.793489	0.00032757		0.792587	0.000954784		0.794771	0.000921598		0.793765	0.000572497		0.789699	0.00232197		0.795246	0.0006517		0.795949	0.00106401		0.792426	0.00100994		0.790674	0.000792996		0.791543	0.00219113		0.792194	0.00134435		0.794223	0.000865336		0.796614	0.000895967		0.793219	0.000938234
0.799005	0.00128234		0.800874	0.00294042		0.800365	0.000905872		0.800087	0.00146435		0.800395	0.00137736		0.797828	0.00117499		0.797511	0.00186192		0.799309	0.00115066		0.802823	0.000588635		0.799613	0.000954944		0.798799	0.00156291		0.797478	0.00132624		0.800007	0.000744001		0.800159	0.000767544		0.80224	0.000676084		0.79978	0.0016455
0.806818	0.000940064		0.808686	0.00240238		0.808488	0.000981901		0.804775	0.00136256		0.808521	0.00160918		0.805015	0.00116985		0.804075	0.00137034		0.805557	0.000917766		0.810635	0.000885527		0.807738	0.00095367		0.805673	0.00147058		0.805604	0.00125905		0.807194	0.00122959		0.808284	0.000673977		0.806303	0.000927062		0.807906	0.00148019
0.812755	0.00163103		0.813375	0.00210503		0.813802	0.00051663		0.80946	0.000589905		0.815395	0.00142946		0.81314	0.00059928		0.808448	0.00199657		0.813682	0.00107827		0.815949	0.00161531		0.812423	0.000998264		0.809423	0.00126996		0.811852	0.00105109		0.811256	0.000524902		0.814533	0.000582523		0.812864	0.000698295		0.813529	0.000968423
0.817131	0.00219544		0.817125	0.00103305		0.817865	0.000592457		0.816959	0.0010673		0.819145	0.00117006		0.818454	0.000643417		0.813762	0.0013847		0.819618	0.00106319		0.819386	0.00145014		0.816169	0.00128919		0.814111	0.00112499		0.815606	0.00115667		0.815632	0.000585256		0.818286	0.000630468		0.820989	0.00120158		0.817275	0.000970819
0.823068	0.00187664		0.823999	0.00112669		0.824739	0.000540288		0.824459	0.00127697		0.823833	0.00137605		0.821891	0.00121099		0.821885	0.000789143		0.823368	0.000910657		0.825636	0.00114123		0.822738	0.000716474		0.821611	0.00115476		0.820603	0.00139769		0.822819	0.000662185		0.823283	0.00034681		0.826612	0.00117737		0.822905	0.000755667
0.83088	0.0015329		0.831189	0.00178043		0.832864	0.000406834		0.828835	0.000872765		0.83102	0.00155971		0.828139	0.000484866		0.828761	0.00148693		0.828682	0.000719994		0.833136	0.000796288		0.830237	0.000901431		0.828485	0.000702608		0.828415	0.000985613		0.830006	9.66925e-05		0.830783	0.000732694		0.830053	0.00136372		0.830718	0.00088816
0.837755	0.00174201		0.836499	0.00203539		0.838176	0.00112344		0.832897	0.000907465		0.837896	0.00105601		0.835639	0.000748832		0.832511	0.00129443		0.836494	0.00078915		0.839074	0.000826535		0.835547	0.0012431		0.833173	0.000327251		0.834977	0.000873849		0.834694	0.000753564		0.837344	0.000502685		0.835989	0.00171153		0.836653	0.00139921
0.842131	0.0014632		0.840875	0.00154104		0.841926	0.000983114		0.839775	0.000767402		0.842582	0.000721079		0.841579	0.000769186		0.8372	0.00151238		0.843056	0.00105306		0.843449	0.00103204		0.839919	0.000692266		0.837861	0.000540816		0.839356	0.00107647		0.839382	0.000711062		0.842037	0.000652011		0.843489	0.00104011		0.841025	0.000593704
0.847443	0.00169523		0.847127	0.00188661		0.847864	0.00104519		0.847275	0.00085573		0.847583	0.000762015		0.845954	0.00123777		0.844386	0.00106713		0.847431	0.00141004		0.849074	0.00127488		0.846175	0.000516651		0.845048	0.000745969		0.844353	0.000958952		0.846256	0.000596731		0.847034	0.000776627		0.849428	0.000685191		0.846655	0.000649528
0.855256	0.00150337		0.855249	0.00291123		0.855676	0.0014405		0.852585	0.000778338		0.85477	0.00103499		0.85189	0.00109122		0.85126	0.000175317		0.852745	0.00136308		0.856886	0.00149476		0.8543	0.00136924		0.852548	0.000838298		0.851853	0.000824366		0.854069	0.000816043		0.854221	0.000907578		0.8538	0.000337154		0.854155	0.00107839
0.862443	0.00125794		0.861814	0.00254511		0.861614	0.00163684		0.85696	0.00110116		0.862583	0.00204612		0.859702	0.00105672		0.855949	0.000817637		0.860245	0.00132042		0.863761	0.000841122		0.860549	0.0016901		0.858175	0.00142528		0.859353	0.000822873		0.859695	0.00121131		0.86172	0.000878431		0.859739	0.00100302		0.861342	0.00060161
0.866818	0.00153749		0.865876	0.00218375		0.865989	0.00141947		0.863522	0.000656151		0.867582	0.00180117		0.866576	0.00085489		0.860948	0.00187236		0.867432	0.000844518		0.868136	0.00048009		0.86492	0.0012		0.862237	0.00126155		0.86435	0.000402052		0.863758	0.00131842		0.866718	2.64014e-05		0.867552	0.00116738		0.866026	0.000600892
0.871506	0.00174109		0.871499	0.00189072		0.871614	0.00107633		0.871334	0.00101304		0.871957	0.00139269		0.870952	0.000940164		0.868137	0.00198373		0.87212	0.000813925		0.873135	0.000904834		0.870238	0.000708404		0.868799	0.000816941		0.868729	0.00127889		0.870007	0.000563792		0.871097	8.11053e-05		0.874426	0.00115538		0.870719	0.000826106
0.879318	0.00160517		0.879312	0.00199301		0.879426	0.00129815		0.877274	0.00069022		0.878833	0.00176505		0.876266	0.00092988		0.875949	0.00170423		0.876808	0.000461253		0.880948	0.000826106		0.878363	0.000559971		0.876924	0.0013213		0.875916	0.00127206		0.878132	0.000455624		0.878284	0.000716431		0.878801	0.0009184		0.878218	0.000898702
0.886818	0.00147384		0.88619	0.00197419		0.886302	0.000824991		0.881336	0.000270242		0.886957	0.00143822		0.884078	0.00114928		0.880948	0.00166899		0.883995	0.00052847		0.888136	0.000473225		0.885238	0.000599043		0.882551	0.00113384		0.883729	0.00131493		0.884067	9.6055e-05		0.886096	0.00135683		0.883802	0.000475969		0.885718	0.00127294
0.89088	0.00156152		0.890252	0.00158775		0.890676	0.000603982		0.887272	0.000113144		0.892271	0.00135197		0.891265	0.000878029		0.885324	0.00222148		0.891807	0.000645237		0.892823	0.00101038		0.889296	0.000663386		0.886613	0.000884894		0.889039	0.000850387		0.88813	0.000477725		0.891406	0.00120919		0.891615	0.000468195		0.890715	0.00116345
0.894943	0.00134856		0.895875	0.00130229		0.895677	0.00104236		0.895397	0.000692534		0.896333	0.00116415		0.895641	0.00122984		0.891887	0.00146191		0.896809	0.00131525		0.897511	0.00132357		0.894606	0.00125478		0.893175	0.000863106		0.893105	0.0011347		0.894382	0.00143551		0.895473	0.000686439		0.898802	0.000720949		0.895087	0.000457138
0.902131	0.00164076		0.904001	0.00217358		0.90349	0.00110666		0.901962	0.00123638		0.903207	0.00159299		0.900642	0.000676627		0.90001	0.0015661		0.90118	0.000812848		0.905324	0.000793928		0.902732	0.00124523		0.9013	0.00107193		0.900292	0.00144077		0.902508	0.00105852		0.902347	0.000589915		0.90349	0.0010601		0.902594	0.000585079
0.909631	0.00153437		0.910562	0.00268524		0.910676	0.00118269		0.906338	0.00111735		0.911333	0.00140757		0.908141	0.00106186		0.905637	0.00123853		0.908371	0.00097852		0.912823	0.000856567		0.909919	0.000790372		0.906923	0.00095673		0.908417	0.00141454		0.908443	0.0007151		0.910472	0.000277744		0.908178	0.000996358		0.910407	0.000528535
0.914631	0.00200743		0.914312	0.00279986		0.915365	0.000995853		0.911961	0.00126856		0.916957	0.00154942		0.915641	0.00067277		0.9097	0.00126376		0.916496	0.000885451		0.916886	0.00068002		0.913672	0.00116071		0.910673	0.000894817		0.913415	0.00137295		0.912193	0.000902322		0.915469	0.000161577		0.915991	0.000357809		0.914778	0.000752073
0.919005	0.0020155		0.919313	0.0023135		0.920051	0.0011837		0.919773	0.00107045		0.920394	0.00180445		0.920016	0.000880601		0.916574	0.00158938		0.921181	0.00130706		0.920949	0.00103505		0.918357	0.00137137		0.916299	0.000519891		0.916855	0.00206849		0.91782	0.00117604		0.919223	0.000733539		0.92349	0.000909738		0.918524	0.000699363
0.92588	0.00123483		0.926812	0.0017508		0.927864	0.00127752		0.926334	0.000872765		0.926332	0.00165778		0.924079	0.00128083		0.924699	0.00180124		0.92493	0.000644375		0.928135	0.000642479		0.925856	0.00106154		0.924112	0		0.923417	0.00153441		0.92532	0.000972451		0.925472	0.000712207		0.927866	0.000885528		0.925406	0.000881452
0.933693	0.000874764		0.933686	0.00249299		0.935363	0.00178344		0.930084	0.00189548		0.934144	0.00140932		0.931266	0.00101794		0.930011	0.00183321		0.931496	0.000932847		0.935324	0.000766041		0.932738	0.00144187		0.93036	0.000545347		0.931229	0.000975589		0.931568	0.000502164		0.933284	0.000478184		0.931925	0.000735164		0.932906	0.000641862
0.93963	0.00193369		0.938375	0.00275596		0.939739	0.00140572		0.935085	0.00210978		0.940082	0.00134321		0.938453	0.00107772		0.933761	0.00135686		0.939308	0.00146498		0.940323	0.000635615		0.93711	0.000639815		0.934736	0.000976576		0.936539	0.000944022		0.936256	0.000639234		0.938907	0.000865336		0.938803	0.00093217		0.938216	0.000545546
0.943693	0.00150777		0.943063	0.00264956		0.943801	0.00170195		0.942585	0.00194238		0.944458	0.00111314		0.943454	0.000996514		0.939699	0.00119481		0.944931	0.000866492		0.945012	0.000769688		0.941794	9.34343e-06		0.94005	0.00103094		0.940919	0.0015583		0.941257	0.000920598		0.943286	0.00106578		0.945989	0.000550374		0.942587	0.000912359
0.949943	0.00154996		0.95025	0.00200512		0.950988	0.00120069		0.949459	0.00117035		0.949769	0.00130753		0.947829	0.000418232		0.947511	0.00148019		0.949306	0.00029989		0.951573	0.000610516		0.948981	0.000977453		0.947862	0.00089568		0.946854	0.0011635		0.94907	0.000651559		0.949222	0.000870194		0.951303	0.000617227		0.949156	0.000976808
0.958068	0.00106333		0.958062	0.00199863		0.958177	0.00052209		0.954147	0.000531861		0.957582	0.00137999		0.954704	0.000933951		0.953449	0.00181211		0.955246	0.000720425		0.959698	0.000714557		0.956794	0.000911837		0.955049	0.00124925		0.954979	0.00170909		0.956257	0.000300916		0.957034	0.000958691		0.955675	0.000484187		0.956969	0.00130169
0.964005	0.000835328		0.963063	0.00220667		0.963176	0.000932563		0.959148	0.000747213		0.964771	0.00156759		0.962829	0.00128276		0.957511	0.00153261		0.963371	0.000537087		0.965323	0.000947093		0.962111	0.00104328		0.959737	0.000566703		0.961541	0.00167177		0.960945	0.0012587		0.963596	0.000434674		0.96224	0.00035892		0.963217	0.000879774
0.968068	0.00199697		0.967439	0.00192056		0.967865	0.000786977		0.966335	0.000890641		0.969144	0.00123157		0.968452	0.00117735		0.963136	0.00128725		0.96962	0.000760281		0.969698	0.000650845		0.966483	0.00118683		0.964425	0.000741439		0.9656	0.00122983		0.965633	0.00128994		0.967967	0.000417777		0.970053	0.000434435		0.967589	0.0011704
0.974006	0.00186912		0.974	0.00213855		0.974426	0.0010181		0.973835	0.000419348		0.974145	0.00161159		0.972514	0.00095302		0.970949	0.000848524		0.973995	0.000932847		0.975636	0.00104448		0.973044	0.00074323		0.971925	0.000614809		0.970917	0.00154635		0.973133	0.000990727		0.973285	0.000488322		0.975988	0.00108098		0.973212	0.000894629
0.982443	0.00158151		0.982126	0.00258901		0.982551	0.0017798		0.979149	0.000822923		0.981958	0.00151856		0.978767	0.00110386		0.978135	0.000954236		0.979305	0.000764375		0.983761	0.00132014		0.98117	0.000371615		0.979425	0.000485807		0.979043	0.00169203		0.980633	0.000485163		0.981098	0.000454106		0.980051	0.000295842		0.981337	0.000813408
0.988693	0.00124914		0.988061	0.00276244		0.988176	0.00105389		0.983524	0.00104395		0.989458	0.00197169		0.986892	0.000977659		0.982511	0.00138861		0.98743	0.000811771		0.990012	0.000677016		0.9868	7.77206e-05		0.984113	0.000488827		0.985917	0.00106922		0.98563	0.000699587		0.988284	0.000249019		0.986303	0.000606566		0.987906	0.000422158
0.99213	0.001824		0.992124	0.00324837		0.992551	0.00121039		0.990398	0.000522818		0.993833	0.00149316		0.992828	0.000705552		0.987199	0.0018132		0.994308	0.00153198		0.994072	0.000172043		0.990859	0.00081012		0.988798	0.000893523		0.990288	0.000830338		0.990005	0.000613095		0.992656	0.000406794		0.994425	0.00124334		0.991965	0.000524462
0.997443	0.00128949		0.998689	0.00263118		0.998802	0.00153513		0.998524	0.000814931		0.998519	0.00132264		0.99689	0.000691839		0.995012	0.00105168		0.99868	0.00122649		1.00001	0.000817096		0.99742	0.00116602		0.996297	0.00144577		0.995293	0.000779575		0.997196	0.00159723		0.997661	0.00104022		1.00099	0.000454202		0.997588	0.000717812
1.00494	0.0011787		1.00681	0.00126855		1.00693	0.0016971		1.00384	0.000854889		1.00602	0.0011497		1.00314	0.000629276		1.00251	0.00109845		1.00399	0.00134218		1.00814	0.000981416		1.00555	0.000966836		1.00411	0.00109673		1.00342	0.000832044		1.00532	0.00149289		1.00547	0.000805774		1.00474	0.000417777		1.00571	0.00124946
1.01151	0.0015551		1.01244	0.00176702		1.01286	0.00138449		1.00821	0.000603995		1.01383	0.000563029		1.01126	0.000373666		1.0072	0.00136338		1.01212	0.00142599		1.01439	0.00113072		1.01118	0.00103797		1.00849	0.000767325		1.01061	0.00108501		1.01001	0.000663035		1.01297	0.000104339		1.01068	0.000505286		1.01227	0.00101251
1.01619	0.00223488		1.01587	0.00251527		1.01693	0.00108219		1.01477	0.00102545		1.01821	0.000647964		1.01752	0.000319244		1.01189	0.00222996		1.01899	0.00124049		1.01814	0.00203105		1.01492	0.000759793		1.01224	0.000538444		1.01435	0.00117459		1.01376	0.000342355		1.01703	0.000556332		1.0188	0.00142946		1.01603	0.000417605
1.02119	0.00145678		1.02181	0.00218937		1.02318	0.000924475		1.0229	0.00150284		1.02227	0.000874533		1.02095	0.000635704		1.01939	0.00192392		1.02306	0.000838485		1.02314	0.00186952		1.02054	0.000675277		1.01911	0.000626243		1.01873	0.000829272		1.02032	0.00062117		1.0211	0.000789088		1.02537	0.000986364		1.02103	0.00058412
1.02901	0.00106755		1.02931	0.00272503		1.0313	0.00178384		1.02821	0.00130305		1.02915	0.000341714		1.02627	0.000789541		1.02689	0.00142864		1.02743	0.000280931		1.03064	0.00124163		1.02836	0.000213201		1.0263	0.000490337		1.02592	0.000968337		1.02782	0.000452649		1.02829	0.0011359		1.0288	0.00067564		1.02852	0.000206526
1.03651	0.00119228		1.03525	0.00265648		1.03755	0.0020459		1.03165	0.000748895		1.03633	0.00113109		1.03377	0.00156173		1.03126	0.00162331		1.03493	0.000264989		1.03751	0.00125085		1.03461	0.00063939		1.03192	0.00126327		1.0331	0.00130896		1.03344	0.000643484		1.03547	0.00126622		1.0338	0.00122424		1.03541	0.00049643
1.04119	0.00121777		1.03962	0.00182		1.0413	0.00135739		1.0379	0.000504101		1.04164	0.00127798		1.04064	0.00137318		1.03532	0.00146757		1.04212	0.00108452		1.04189	0.000888316		1.03899	0.000495628		1.0363	0.00118928		1.0381	0.00112681		1.03782	0.0014676		1.04047	0.000712207		1.04161	0.00102501		1.03978	0.000766209
1.04588	0.000620901		1.04525	0.00142858		1.04661	0.00101304		1.0454	0.000686435		1.04633	0.000982454		1.04533	0.00116064		1.0422	0.00108322		1.04681	0.000981752		1.04689	0.00117641		1.0443	0.000819252		1.04255	0.00066874		1.04248	0.00134863		1.04376	0.00122789		1.04485	7.03337e-05		1.04818	0.000186345		1.04478	0.0012128
1.05307	0.000881001		1.05306	0.00304487		1.05411	0.000625214		1.05133	0.000603995		1.0529	0.000902553		1.05033	0.00110879		1.0497	0.00186366		1.05149	0.00121938		1.05439	0.000874158		1.05211	0.00128642		1.05036	0.000674996		1.04936	0.00128273		1.05188	0.000724663		1.05172	0.00023529		1.05287	0.000207667		1.05196	0.000620538
1.06088	0.00126033		1.06025	0.00298		1.06068	0.000798502		1.05571	0.000630914		1.06071	0.000889638		1.05783	0.000764473		1.0547	0.00232153		1.05837	0.00116746		1.06189	0.000805083		1.05929	0.000893787		1.05661	0.00150618		1.05748	0.000946581		1.05813	0.000159383		1.05954	0.000204242		1.05786	0.000870203		1.05977	0.000710145
1.06588	0.00178273		1.06463	0.0024026		1.06536	0.000790616		1.06134	0.000756256		1.06664	0.00115408		1.06533	0.000666985		1.05939	0.0022491		1.06649	0.00149148		1.06689	0.00110412		1.06367	0.00100952		1.06099	0.00150445		1.0631	0.00149452		1.06219	0.000793304		1.06547	0.000434463		1.06536	0.001252		1.06478	0.000706551
1.07026	0.000772779		1.06931	0.00226008		1.07036	0.000988169		1.06915	0.000803785		1.07071	0.00136445		1.07033	0.000825108		1.06595	0.00178014		1.07181	0.000669582		1.07126	0.000683667		1.06836	0.00075045		1.06661	0.00109544		1.06716	0.00117437		1.06782	0.00142255		1.06953	0.000910112		1.07286	0.0011023		1.06915	0.000847669
1.07744	0.00113578		1.07713	0.00223997		1.07786	0.00091942		1.07602	0.000554574		1.07664	0.00124076		1.0747	0.00113021		1.07376	0.00243768		1.07587	0.000582976		1.07845	0.00050862		1.07617	0.000236772		1.07442	0.00125507		1.07342	0.000983907		1.07563	0.00148333		1.07579	0.00102839		1.07755	0.000610564		1.07571	0.000335905
1.08557	0.00167909		1.08463	0.0018053		1.08536	0.000679809		1.0804	0.000953732		1.08477	0.00177161		1.08189	0.000801968		1.0797	0.00187606		1.08243	0.00106491		1.08626	0.00117084		1.08367	0.00050667		1.0813	0.00127837		1.08154	0.00101953		1.08251	0.00130376		1.08391	0.000747268		1.08224	0.000428216		1.08384	0.000858211
1.09026	0.00161966		1.08931	0.00195841		1.09036	0.000874733		1.08571	0.000938801		1.09133	0.00217353		1.0897	0.000813752		1.08376	0.00112063		1.09056	0.000541396		1.09157	0.000590995		1.08836	0.00104116		1.08536	0.00151847		1.08748	0.00141411		1.08688	0.000436923		1.08985	0.000474593		1.08911	0.000911293		1.08947	0.00106474
1.09401	0.00121869		1.094	0.00261647		1.09474	0.000867454		1.09352	0.000352681		1.0954	0.00123704		1.0947	0.000387378		1.0897	0.0010767		1.09649	0.000668935		1.09563	0.000601935		1.09305	0.000827533		1.09099	0.00110385		1.09185	0.00152246		1.09188	0.000308141		1.09391	0.000548095		1.09724	0.00119492		1.09321	0.00118741
1.10057	0.00131004		1.1015	0.00315906		1.10193	0.000810837		1.10071	0.000167613		1.10102	0.000803826		1.09939	0.000442443		1.09782	0.00141406		1.10056	0.000783764		1.10282	0.000707263		1.10055	0.000425552		1.09911	0.000643716		1.09811	0.000833538		1.10001	0.00037402		1.10016	0.000807886		1.10255	0.000751822		1.10009	0.000684509
1.10807	0.00172128		1.109	0.00242055		1.10974	0.000917398		1.1054	0.000781493		1.10915	0.00102886		1.10658	0.000766615		1.10439	0.00124766		1.10681	0.000491199		1.11064	0.00059314		1.10805	0.000245054		1.10567	0.000298776		1.10622	0.000712175		1.10719	0.000365732		1.10828	0.000217971		1.10661	0.000649876		1.10821	0.00021611
1.11369	0.00164259		1.11337	0.00208643		1.11505	0.000647658		1.11008	0.000863301		1.11571	0.00153979		1.11439	0.000937379		1.10845	0.00223018		1.11493	0.000478704		1.11564	0.000457994		1.11274	0.000684621		1.10942	0.000489043		1.11217	0.00149474		1.11094	0.000609694		1.11454	0.00025958		1.1138	0.001246		1.11384	0.00130912
1.11807	0.00114807		1.11775	0.00153779		1.11911	0.00082216		1.1179	0.00148202		1.11946	0.00136379		1.11908	0.0010203		1.11407	0.00167834		1.12087	0.000727535		1.11939	0.000618882		1.11648	0.000485648		1.11442	0.000336743		1.1156	0.00100097		1.11563	0.000632858		1.11797	0.000879698		1.12161	0.00118381		1.11728	0.00181873
1.12432	0.00126363		1.12463	0.0018332		1.12599	0.00129511		1.1254	0.000953943		1.12446	0.00113197		1.12283	0.00101066		1.12251	0.00146779		1.12462	0.000946635		1.12564	0.00106915		1.12336	0.000273933		1.12161	0.00071059		1.12123	0.00175879		1.12282	0.000831769		1.12329	0.00117561		1.12693	0.00101568		1.12321	0.000936078
1.13244	0.00135626		1.13181	0.00267681		1.13411	0.00126074		1.12946	0.000513775		1.13196	0.000927071		1.12939	0.000910168		1.12907	0.00146344		1.13025	0.000828791		1.13345	0.000307189		1.13086	0.00127114		1.12849	0.000775523		1.12873	0.00137018		1.13001	0.000317492		1.13079	0.00110865		1.13037	0.00110141		1.13103	0.000795678
1.13869	0.00118072		1.13712	0.00274255		1.13911	0.00132848		1.13352	0.00111125		1.13883	0.000920285		1.13689	0.00037238		1.13251	0.00117893		1.13774	0.000620893		1.13907	0.000610945		1.13618	0.00102481		1.13349	0.000976792		1.13529	0.00109972		1.13469	0.000509602		1.13735	0.000890892		1.13661	0.00139592		1.13697	0.000312904
1.14276	0.00138433		1.1415	0.00229058		1.14286	0.000891112		1.14071	0.00110915		1.14321	0.000732463		1.14283	0.00043473		1.13751	0.00105016		1.14399	0.000420104		1.14345	0.000301397		1.14055	0.000831993		1.13817	0.00101497		1.13966	0.000980068		1.13938	0.000464974		1.14172	0.000797325		1.14411	0.00183258		1.14134	0.000272893
1.14838	0.000631356		1.14806	0.00206545		1.14943	0.000674349		1.1479	0.000872975		1.14821	0.00151177		1.14689	0.000274679		1.14501	0.00120286		1.14837	0.000935002		1.14939	0.000448985		1.14711	0.000874038		1.14536	0.000700451		1.14498	0.00127036		1.14626	0.000873421		1.14704	0.000940738		1.15005	0.00106876		1.14696	0.000199099
1.15651	0.00116275		1.15588	0.00179513		1.15693	0.0011014		1.15321	0.00119895		1.15571	0.00137386		1.15314	0.000196475		1.15189	0.00105212		1.15368	0.000360213		1.1572	0.000446625		1.15492	0.000498389		1.15286	0.000681252		1.15248	0.00179846		1.15438	0.000718713		1.15454	0.000851184		1.15412	0.000951049		1.15478	0.000710624
1.16338	0.00114954		1.16213	0.00190391		1.16255	0.000982103		1.15759	0.000623554		1.16321	0.00130096		1.16127	0.000838391		1.15626	0.001463		1.1615	0.000610552		1.16407	0.00088231		1.16117	8.49406e-05		1.15817	0.000665073		1.15967	0.00130214		1.15969	0.000544666		1.16204	0.00120496		1.16005	0.000613229		1.16165	0.000683311
1.16744	0.00126657		1.16619	0.00235545		1.16693	0.000803557		1.16415	0.000173291		1.16821	0.000681457		1.16783	0.00139696		1.16126	0.00171445		1.16868	0.00088265		1.16814	0.000895395		1.16524	0.000384568		1.16255	0.00114851		1.16435	0.00101057		1.16376	0.00123915		1.16672	0.00101825		1.16818	0.000824894		1.16603	0.000951412
1.17276	0.000912184		1.17181	0.00174994		1.17286	0.000737639		1.17196	0.000124921		1.17258	0.000832065		1.17189	0.00128491		1.16845	0.00119111		1.17306	0.00089967		1.17345	0.00064634		1.17117	0.000297504		1.16911	0.00134999		1.16904	0.00116798		1.17032	0.000895522		1.17141	0.000818024		1.17474	0.00104766		1.17103	0.0014936
1.18057	0.00102866		1.17994	0.00232604		1.18068	0.00125568		1.17821	0.000612408		1.17946	0.00158116		1.1772	0.000436444		1.17626	0.00159047		1.17806	0.000964086		1.18126	0.00069997		1.17898	0.00108512		1.17724	0.000954572		1.17654	0.00108074		1.17844	0.00104279		1.17859	0.000921518		1.1788	0.0010561		1.17884	0.000944943
1.18776	0.000868528		1.1865	0.00284095		1.18755	0.00114892		1.18227	0.000969926		1.18758	0.00158292		1.18502	9.02026e-05		1.18126	0.00197895		1.18556	0.00111791		1.18845	0.000750596		1.18555	0.000881046		1.18286	0.000786309		1.18404	0.00144867		1.18438	0.000718288		1.1864	0.000893427		1.18411	0.00065032		1.18603	0.00155182
1.19151	0.00123758		1.19056	0.00298389		1.19161	0.000715397		1.18821	0.000791167		1.1929	0.00112431		1.1922	0.000499435		1.18564	0.00158764		1.19306	0.00092186		1.19282	0.000687528		1.18993	0.000903343		1.18693	0.000690744		1.18904	0.00159392		1.18845	0.000834744		1.19141	0.000246273		1.19193	0.00113628		1.19072	0.00195242
1.19619	0.00171229		1.1965	0.00241471		1.19693	0.00080477		1.19633	0.000272134		1.19696	0.00143559		1.19658	0.000907383		1.19251	0.00105168		1.19775	0.000689402		1.19782	0.000920922		1.19555	0.00153063		1.1938	0.000997717		1.19341	0.00145357		1.19469	0.001454		1.19547	0.000597519		1.19911	0.00129487		1.19572	0.00107312
1.20338	0.00102407		1.20463	0.00278364		1.20474	0.0011841		1.2029	0.000784857		1.20383	0.00117728		1.20158	0.000705552		1.20032	0.00165985		1.20243	0.000992524		1.20564	0.0011659		1.20367	0.0012		1.20192	0.00141234		1.20091	0.00119293		1.20313	0.000979251		1.20266	0.00102755		1.2038	0.000866428		1.20322	0.000622455
1.21057	0.000924473		1.21119	0.00256717		1.21161	0.000809623		1.20696	0.000754784		1.21196	0.000599367		1.20939	0.00053286		1.20564	0.00192827		1.20993	0.00113364		1.21282	0.00139243		1.21023	0.000970233		1.20723	0.000960397		1.20873	0.00113214		1.20876	0.00081073		1.21078	0.00114097		1.20849	0.000505731		1.21071	0.000685227
1.21557	0.00175888		1.21462	0.00214785		1.21599	0.000686482		1.2129	0.000385278		1.21727	0.000881757		1.21658	0.000408376		1.21001	0.00162048		1.21743	0.00084344		1.21689	0.00110283		1.21399	0.00149347		1.21068	0.00130404		1.21342	0.000974309		1.21219	0.000556142		1.21547	0.000535423		1.2163	0.000882419		1.21509	0.00122598
1.22026	0.00215637		1.21962	0.00218612		1.2213	0.00111131		1.22102	0.000589484		1.22102	0.000926195		1.22064	0.000563284		1.2172	0.00109823		1.22212	0.0008973		1.22126	0.000787493		1.21867	0.00105454		1.21661	0.00077164		1.21716	0.00119762		1.21782	0.000370832		1.21922	0.000586113		1.2238	0.000927506		1.21915	0.0010887
1.22713	0.00122144		1.22712	0.00237924		1.22911	0.000997268		1.22727	0.000752681		1.22696	0.000678611		1.22502	0.000701695		1.22501	0.00106691		1.22587	0.00133356		1.22845	0.000455849		1.22649	0.000712227		1.22411	0.00100958		1.22372	0.00140451		1.22563	0.000576968		1.22578	0.000618851		1.22787	0.00178794		1.22603	0.00120849
1.23494	0.00124859		1.23369	0.00203907		1.2363	0.00129613		1.23102	0.000891903		1.23477	0.000777557		1.2322	0.000830035		1.23032	0.00126941		1.23243	0.000826421		1.23532	0.000326924		1.23336	0.000492655		1.23036	0.00123652		1.23122	0.000498459		1.23188	0.000838569		1.23328	0.000726992		1.23224	0.000994581		1.23321	0.000593944
1.24026	0.00113982		1.23837	0.00199496		1.24036	0.000875542		1.23602	0.00129211		1.24071	0.000367326		1.23939	0.00112893		1.23407	0.00134076		1.24025	0.000627571		1.24032	0.000468935		1.23774	0.00048947		1.23473	0.00114915		1.23654	0.000964284		1.23626	0.00102239		1.23891	0.00075973		1.23943	0.00116671		1.23853	0.000786813
1.24432	0.000799926		1.24369	0.00187623		1.24474	0.000563541		1.24352	0.00123428		1.24508	0.00111883		1.24439	0.000816966		1.24001	0.00167486		1.24556	0.000518775		1.24501	0.000957605		1.24274	0.00119745		1.24036	0.00100354		1.24091	0.00110932		1.24157	0.000978189		1.24328	0.000523172		1.24661	0.00137704		1.2429	0.000822273
1.25088	0.000434722		1.25087	0.00144394		1.25193	0.000706095		1.25009	0.000847739		1.25071	0.00159517		1.24908	0.00031196		1.24751	0.00198221		1.24962	0.00125967		1.25188	0.00101896		1.24992	0.00178163		1.24786	0.000706491		1.24716	0.00134117		1.24907	0.000958		1.24922	0.00135598		1.25162	0.00171931		1.24946	0.000809574
1.25932	0.000610079		1.25837	0.00225338		1.25911	0.000615104		1.25477	0.000955625		1.25852	0.0019833		1.25595	0.000841391		1.25345	0.00224997		1.25618	0.000889544		1.2597	0.000973265		1.25774	0.00132359		1.25505	0.00141859		1.25529	0.000612782		1.25626	0.000918686		1.25703	0.00125566		1.25599	0.00113962		1.25728	0.000263789
1.26494	0.000973999		1.26338	0.00250251		1.26411	0.000676371		1.25977	0.00141619		1.2654	0.0015665		1.26377	0.00140939		1.25782	0.00170553		1.2643	0.000594609		1.26532	0.000890461		1.26273	0.00108044		1.25942	0.00109414		1.26154	0.000761232		1.26094	0.000524478		1.26391	0.0017349		1.26286	0.000476413		1.26321	0.000296133
1.26901	0.000940982		1.26775	0.00223608		1.26849	0.000794863		1.26727	0.000856361		1.26977	0.00185239		1.26939	0.00084332		1.26345	0.00115239		1.27056	0.00134003		1.26939	0.00130276		1.26711	0.000902493		1.26442	0.00107646		1.26592	0.00108394		1.26595	0.000694274		1.26797	0.00155853		1.27068	0.00110275		1.26728	0.000289664
1.27526	0.000960975		1.27463	0.00257668		1.27536	0.000809623		1.27477	0.000136698		1.27477	0.00254698		1.27345	0.000945521		1.27126	0.000965329		1.27462	0.00108452		1.27595	0.00113737		1.27367	0.00088593		1.27224	0.0013282		1.27123	0.00122578		1.27313	0.00071		1.27328	0.000751281		1.27661	0.0010641		1.27353	0
1.28369	0.000748383		1.28275	0.00222008		1.28349	0.000869678		1.27977	0.00042103		1.28258	0.00133862		1.28002	0.000858532		1.27814	0.0016455		1.28024	0.000507572		1.28376	0.000838119		1.2818	0.00110996		1.27942	0.000846927		1.27935	0.00101419		1.28063	0.000710425		1.28141	0.000626666		1.28036	0.000795798		1.28165	0.000446835
1.28932	0.00152703		1.28806	0.00202242		1.28911	0.00162875		1.28415	0.00106477		1.28977	0.000830752		1.28783	0.00123948		1.28251	0.00159025		1.28837	0.000952237		1.2897	0.000566969		1.28711	0.000451459		1.28411	0.000929333		1.28622	0.0014299		1.28563	0.00052129		1.28828	0.00122799		1.28662	0.00104189		1.2879	0.000889598
1.29276	0.00104425		1.29244	0.00256522		1.29318	0.0011839		1.29134	0.00146625		1.29415	0.000851767		1.29377	0.000614706		1.28751	0.00144473		1.29525	0.000701251		1.29376	0.000270935		1.29117	0.000351441		1.2888	7.57186e-05		1.29029	0.000919493		1.29001	0.000256713		1.29266	0.000712207		1.29474	0.00156139		1.29197	0.0010288
1.29838	0.000667125		1.29931	0.00215866		1.29974	0.00116004		1.29946	0.0015409		1.29914	0.000919628		1.29783	0.000371095		1.29532	0.00135207		1.29931	0.000636835		1.30001	0.000577266		1.29805	0.000555724		1.2963	0.000624085		1.2956	0.000769124		1.29751	0.000834319		1.29766	0.000333504		1.30099	0.00172641		1.29759	0.000952131
1.30619	0.000933644		1.30744	0.00150752		1.30786	0.00149489		1.30446	0.00096572		1.30696	0.000625198		1.30408	0.00063956		1.30251	0.00154566		1.30493	0.00114355		1.30845	0.000587134		1.30649	0.00121805		1.3038	0.000784583		1.30373	0.000839083		1.30532	0.000770565		1.30578	0.000776627		1.30505	0.00166689		1.30572	0.000900619
1.31244	0.00199606		1.31244	0.0018732		1.3138	0.000810837		1.30853	0.000434279		1.31415	0.00077296		1.31251	0.00114435		1.3072	0.00106582		1.31306	0.000696511		1.31438	0.000138793		1.3118	0.0012034		1.30818	0.000890071		1.31091	0.000942529		1.31001	0.000376357		1.31297	0.000814222		1.31099	0.000877977		1.31228	0.000916911
1.31682	0.00164791		1.31588	0.00222829		1.31786	0.000930541		1.31571	0.000400841		1.31852	0.000833598		1.31845	0.000957091		1.3122	0.00108474		1.31993	0.000427429		1.31782	0.00134803		1.31524	0.000812456		1.31224	0.00102511		1.31467	0.00122002		1.31375	0.000296453		1.31672	0.00101825		1.31911	0.000903297		1.31572	0.000717332
1.32244	0.000874031		1.32213	0.0027233		1.32411	0.00165241		1.32384	0.000812197		1.32258	0.000992524		1.32189	0.00121206		1.32001	0.00148345		1.32368	0.000585992		1.32314	0.00135253		1.32149	0.000598831		1.31911	0.00120934		1.31904	0.00100161		1.32032	0		1.32109	0.000714953		1.32536	0.0010068		1.32072	0.000917869
1.32994	0.00126822		1.32963	0.00187839		1.33255	0.00150905		1.32883	0.00140168		1.32977	0.00172345		1.32751	0.00138646		1.3272	0.00165768		1.32837	0.000380464		1.33095	0.00120945		1.32899	0.000772747		1.3263	0.000752872		1.32654	0.00112852		1.32782	0.000690874		1.32828	0.000789299		1.32911	0.00087509		1.32822	0.00130672
1.33713	0.00140377		1.33556	0.00179687		1.33849	0.00123385		1.33258	0.00135899		1.33696	0.000942613		1.33502	0.000844605		1.33157	0.00219972		1.33587	0.000490768		1.33751	0.000837904		1.33492	5.33002e-05		1.33161	0.00102274		1.33341	0.0016963		1.33313	0.00130801		1.33547	0.000297386		1.33412	0.000723615		1.33509	0.0007365
1.34182	0.00147824		1.33994	0.001969		1.34193	0.000655342		1.33884	0.0012307		1.34227	0.000850891		1.34158	0.000481224		1.33564	0.00263736		1.34306	0.000822328		1.34189	0.00102539		1.3393	0.000211714		1.33598	0.00118993		1.3381	0.00168456		1.33751	0.00152477		1.34016	1.64745e-05		1.34162	0.000854212		1.33978	0.000655039
1.34651	0.000918787		1.34588	0.00187926		1.34755	0.000626629		1.34634	0.00082103		1.34664	0.000914593		1.34595	0.000833249		1.34251	0.00217427		1.34774	0.00102355		1.34689	0.000961037		1.34492	0.000589912		1.34255	0.000679742		1.34279	0.00137295		1.34376	0.000631583		1.34484	0.000662995		1.34818	0.00097548		1.34478	0.000874743
1.35401	0.00082634		1.35369	0.00231674		1.35505	0.000609644		1.35196	0		1.35352	0.00142311		1.35126	0.00147367		1.35001	0.00217514		1.35243	0.000592239		1.35439	0.000743302		1.35274	0.000551689		1.35036	0.000787819		1.34998	0.000410157		1.35157	0.00128803		1.35172	0.00114857		1.35287	0.00141369		1.35197	0.000363458
1.36182	0.00187829		1.36025	0.00157001		1.36161	0.000363967		1.35633	0.000261829		1.36133	0.00135876		1.35876	0.00116364		1.35501	0.00166921		1.35962	0.00103023		1.36189	0.00105564		1.35992	0.000298566		1.3563	0.00134827		1.35779	0.000766351		1.35782	0.00115181		1.35953	0.0012753		1.35786	0.00133929		1.35947	0.0011093
1.36651	0.00171174		1.36463	0.00139982		1.3663	0.00109048		1.36227	0.000801261		1.36696	0.000398629		1.36627	0.000850604		1.35939	0.00137708		1.36743	0.00124696		1.36657	0.000856996		1.36429	0.000961102		1.36067	0.000422169		1.36311	0.00129915		1.36219	0.000368282		1.36516	0.000776838		1.36537	0.000985697		1.36446	0.000490201
1.37088	0.00122199		1.36994	0.00155163		1.3713	0.000998886		1.37009	0.000329127		1.37133	0.000900364		1.37095	0.00124355		1.36626	0.00202854		1.37275	0.00110046		1.37095	0.000665861		1.3693	0.000837939		1.36661	0.000629263		1.36748	0.00137082		1.36782	0.000325992		1.36922	0.000238458		1.37287	0.00148654		1.36884	0.000523504
1.37838	0.00102884		1.37775	0.00185201		1.37911	0.000270751		1.37696	0.000805678		1.37727	0.00161904		1.37564	0.0012112		1.37407	0.00163897		1.37712	0.00049443		1.37845	0.00110755		1.37711	0.000984036		1.37443	0.0010853		1.37404	0.00151628		1.37563	0.00086917		1.37578	0.000648421		1.37755	0.00154607		1.37572	0.00046744
1.38619	0.0013581		1.38494	0.00277109		1.38661	0.00100556		1.38102	0.000929757		1.38539	0.00121143		1.38283	0.00135475		1.38001	0.00170314		1.38368	0.000681215		1.38626	0.00106379		1.3843	0.00113778		1.38099	0.00100721		1.38216	0.00162314		1.38251	0.00106319		1.38391	0.00120813		1.38224	0.00116738		1.38384	0.000839763
1.39088	0.00104645		1.38931	0.00217553		1.3913	0.0012383		1.38634	0.000783806		1.39164	0.00191719		1.39064	0.000219186		1.38407	0.00160591		1.39181	0.00078161		1.39126	0.000768615		1.38867	0.000558272		1.38505	0.000649325		1.38779	0.00143587		1.38657	0.0011125		1.38984	0.000357793		1.38943	0.000772033		1.38915	0.000717812
1.39463	0.000941532		1.394	0.00168593		1.39599	0.0013305		1.39446	0.00101136		1.39571	0.00185589		1.39564	0.000453156		1.39032	0.00150477		1.39712	0.000602796		1.39564	0.000605797		1.39336	0.00104456		1.39098	0.000925234		1.39217	0.00075398		1.39188	0.00138876		1.39391	0.000637438		1.39724	0.000783361		1.39322	0.000425033
1.40151	0.00124841		1.40212	0.00282343		1.40318	0.00142452		1.40134	0.00112702		1.40165	0.00204393		1.40002	0.000696981		1.39845	0.00149802		1.40149	0.000978089		1.40282	0.000803796		1.40118	0.0011571		1.3988	0.0010812		1.39842	0.000633471		1.40001	0.000953325		1.40016	0.000719177		1.40224	0.000781806		1.40009	0.000850305
1.40901	0.000576695		1.40963	0.00338785		1.41099	0.000676776		1.40571	0.00114847		1.40977	0.00111511		1.4072	0.000697624		1.4047	0.00059773		1.40806	0.0010955		1.41095	0.00085335		1.40899	0.000831993		1.40536	0.00112327		1.40654	0.000857639		1.40688	0.000525327		1.4086	0.00041482		1.40661	0.00101168		1.40822	0.000795199
1.41432	0.000622735		1.41369	0.00286344		1.41599	0.000740065		1.41102	0.000924079		1.41633	0.00128345		1.41502	0.000294176		1.40876	0.00160439		1.41618	0.000777732		1.41564	0.000799077		1.41336	0.00130766		1.40911	0.000893091		1.41216	0.00123985		1.41063	0.000817105		1.41422	0.000394333		1.4138	0.00152163		1.41353	0.000814846
1.41869	0.000654285		1.41775	0.00233015		1.42036	0.000965118		1.41883	0.000751629		1.42008	0.000734433		1.4197	0.000414375		1.4147	0.00173707		1.42181	0.000888036		1.41939	0.00142268		1.41743	0.000887841		1.41411	0.00120265		1.41592	0.000850387		1.41563	0.00135986		1.41797	0.000502473		1.42161	0.00187367		1.41697	0.00141574
1.42494	0.000809098		1.42494	0.00276309		1.42755	0.000747143		1.42602	0.000494427		1.42508	0.00109453		1.42377	0.00128105		1.42282	0.000892897		1.42524	0.00114096		1.42595	0.00150977		1.4243	0.000580569		1.42161	0.00115066		1.42154	0.000861479		1.42313	0.00181187		1.42359	0.00098805		1.42661	0.000911959		1.42322	0.00140016
1.43276	0.000704544		1.43244	0.00253646		1.43536	0.000710139		1.43008	0.00103933		1.4329	0.00115867		1.43033	0.00123198		1.42907	0.000507896		1.43118	0.00132559		1.43345	0.000913414		1.4318	0.00119894		1.42849	0.000934726		1.42935	0.000803677		1.43001	0.00133372		1.43109	0.000641873		1.43036	0.000986364		1.43072	0.00107792
1.43901	0.000748016		1.43744	0.00183579		1.44005	0.00115842		1.43415	0.00110978		1.43946	0.000942394		1.43783	0.000920667		1.43282	0.00154979		1.43868	0.00136782		1.43876	0.00117834		1.4368	0.00110911		1.43318	0.00171715		1.4356	0.00105365		1.4347	0.00124043		1.43734	0.000369621		1.43661	0.00140592		1.43665	0.000661748
1.44338	0.000426835		1.44181	0.00176745		1.4438	0.000983114		1.44134	0.00110683		1.44383	0.00128936		1.44314	0.00101901		1.43782	0.00104342		1.44493	0.000703837		1.44314	0.00102539		1.44117	0.000765951		1.43817	0.00159635		1.43998	0.0012663		1.43938	0.000875333		1.44172	0.000383138		1.44443	0.00118492		1.44103	0.000684029
1.44901	0.000258999		1.44838	0.00210871		1.45036	0.00185421		1.44884	0.00109569		1.44915	0.00118516		1.44752	0.000911454		1.44564	0.000734329		1.44931	0.000897731		1.44939	0.000620169		1.44805	0.000895061		1.44536	0.000480414		1.44529	0.00140068		1.44657	0.000920598		1.44703	0.000709039		1.45005	0.000987474		1.44697	0.000617903
1.45713	0.00131682		1.45619	0.00252802		1.45786	0.00144009		1.45383	0.00060694		1.45665	0.000738592		1.45377	0.00149745		1.4522	0.000882239		1.45493	0.000598487		1.45751	0.00128431		1.45618	0.000967048		1.45286	0.000297266		1.4531	0.00138041		1.45438	0.000577818		1.45484	0.000872728		1.45443	0.00113473		1.45478	0.000799512
1.46401	0.00166313		1.46213	0.00297784		1.46349	0.00137397		1.45821	0.00108307		1.46415	0.00091919		1.46189	0.000561142		1.45657	0.000869188		1.46275	0.000530624		1.46376	0.00114016		1.4618	0.00141745		1.45786	0.00073734		1.46029	0.00188762		1.45969	0.00104683		1.46203	0.00123052		1.46036	0.00086354		1.46134	0.00097585
1.46807	0.000728206		1.46619	0.00243309		1.46786	0.00152866		1.46508	0.00107718		1.46883	0.00122435		1.46814	0.000588352		1.46189	0.000948581		1.46993	0.000681431		1.46814	0.00066672		1.46617	0.000862571		1.46224	0.00105855		1.46467	0.00144291		1.46407	0.000964588		1.46672	0.000654124		1.46818	0.000763371		1.46571	0.000523744
1.47369	0.00138708		1.47244	0.00178281		1.47411	0.0013303		1.4729	0.000458044		1.47352	0.00112387		1.47251	0.00113664		1.46939	0.00132227		1.47431	0.000726673		1.47345	0.00115453		1.47211	0.000593734		1.46942	0.00104776		1.46935	0.000943382		1.47063	0.000661122		1.47141	0.000928066		1.47474	0.00117626		1.47103	0.000926255
1.48151	0.00139772		1.48056	0.00235956		1.48193	0.000983519		1.47852	0.000596424		1.48071	0.000988146		1.47814	0.00166843		1.47657	0.00142798		1.479	0.00054075		1.48126	0.00109339		1.48023	0.0011777		1.47724	0.00157995		1.47685	0.000857853		1.47844	0.000892334		1.4786	0.000490646		1.47911	0.00094061		1.47884	0.00142987
1.48838	0.00100481		1.48681	0.00186023		1.48818	0.000954199		1.4829	0.00138906		1.48852	0.000595208		1.48595	0.00170699		1.48157	0.00149237		1.48681	0.000913889		1.48814	0.000755101		1.48649	0.000937744		1.48255	0.00117439		1.48435	0.000947434		1.48407	0.00124744		1.48641	0.00104085		1.48443	0.000633218		1.48603	0.00075351
1.49213	0.00100005		1.49088	0.00282062		1.49255	0.00110848		1.48915	0.0013285		1.49383	0.000712104		1.49283	0.00123927		1.48595	0.00177274		1.494	0.00128509		1.49251	0.000330357		1.49086	0.00102799		1.48692	0.00129843		1.48935	0.00140451		1.48813	0.000557842		1.4914	0.000422424		1.49224	0.00137949		1.4904	0.000569505
1.49682	0.000810748		1.49681	0.00271271		1.49818	0.000997673		1.49727	0.000885594		1.4979	0.00151746		1.49689	0.000890671		1.49314	0.00161961		1.49868	0.00110477		1.49782	0.000695036		1.49648	0.00108681		1.4938	0.000874755		1.49373	0.000844202		1.49501	0.00038167		1.49578	0.000626666		1.49911	0.000628776		1.49541	1.53337e-05
1.50432	0.000978401		1.50525	0.00263356		1.50599	0.000860377		1.50321	0.000650473		1.50508	0.0017217		1.5022	0.00178134		1.50095	0.00142624		1.50368	0.000737229		1.50595	0.000492961		1.50461	0.0012637		1.50192	0.00088662		1.50123	0.00112894		1.50313	0.000516402		1.50297	0.00147151		1.50349	0.00129997		1.50322	0.000492118
1.51119	0.00113725		1.51119	0.00194673		1.51286	0.000938023		1.50727	0.000801682		1.51321	0.000962096		1.51033	0.00167935		1.50626	0.00098099		1.51118	0.00116918		1.51282	0.000456922		1.51118	0.00147648		1.50692	0.00129865		1.50904	0.000769977		1.50876	0.00129037		1.5111	0.00157395		1.5088	0.000973482		1.51072	0.00102329
1.51588	0.00144302		1.51494	0.00157023		1.51724	0.000561924		1.51352	0.00147634		1.51821	0.00067883		1.51752	0.00124227		1.51032	0.00162766		1.51868	0.00159532		1.51689	0.000677445		1.51492	0.00127475		1.51067	0.00111162		1.51373	0.00133285		1.5122	0.000565917		1.51578	0.000598786		1.51661	0.00103789		1.51446	0.00107432
1.52057	0.000839179		1.52025	0.00159618		1.52255	0.00121363		1.52165	0.0015327		1.52196	0.0011543		1.52127	0.00138561		1.51751	0.000982078		1.52306	0.00109227		1.52126	0.000772477		1.51992	0.000947724		1.51692	0.000822766		1.51748	0.00186906		1.51813	0.00086832		1.51922	0.000928066		1.5238	0.00141414		1.51884	0.000695769
1.52776	0.00104719		1.52775	0.00177567		1.53036	0.00092306		1.5279	0.000836803		1.52821	0.00250999		1.52564	0.00103165		1.52564	0.00120677		1.52712	0.000984983		1.52876	0.000627034		1.52773	0.000783577		1.52442	0.00131095		1.52435	0.00144163		1.52563	0.000453711		1.52578	0.0011811		1.52786	0.00118359		1.52603	0.00187216
1.53557	0.000653551		1.53431	0.00215628		1.53724	0.0013396		1.53134	0.000754363		1.53602	0.00178278		1.53314	0.000664843		1.53032	0.00145147		1.53399	0.000712023		1.53564	0.00131134		1.5343	0.00110317		1.53005	0.00132346		1.53185	0.00135418		1.53188	0.00095715		1.5336	0.00110422		1.53224	0.0016469		1.53322	0.00207173
1.54088	0.00123171		1.53869	0.00272352		1.5413	0.00122778		1.53665	0.000932702		1.54164	0.000752164		1.54002	0.000807753		1.53407	0.00164049		1.54118	0.00100308		1.54032	0.00130405		1.53899	0.00135459		1.53443	0.00071512		1.53716	0.0016739		1.53626	0.00141299		1.53891	0.00167977		1.53943	0.00177261		1.53821	0.00158417
1.54526	0.000906131		1.544	0.00238032		1.54599	0.00173369		1.54415	0.000789695		1.54602	0.00120465		1.54502	0.00079704		1.54064	0.000957064		1.54649	0.0010606		1.54501	0.0012871		1.54398	0.00128197		1.54036	0.000612005		1.54154	0.00147106		1.54188	0.00129441		1.54328	0.0013638		1.54661	0.00151519		1.54259	0.00099334
1.55182	0.000922822		1.55119	0.00191818		1.55318	0.00139096		1.55071	0.000619347		1.55196	0.00216149		1.5497	0.00113064		1.54814	0.00128616		1.55118	0.000916043		1.5522	0.000807657		1.55117	0.00109467		1.54817	0.000708433		1.5481	0.000586761		1.54938	0.000965651		1.54953	0.0010267		1.55161	0.00106343		1.54947	0.0010149
1.55994	0.00113065		1.55869	0.00154579		1.56036	0.0011107		1.55508	0.000943007		1.55977	0.00125477		1.55658	0.000765544		1.55407	0.00142559		1.55774	0.000841286		1.56001	0.000976268		1.55898	0.000596495		1.55473	0.00112046		1.55592	0.000779362		1.55657	0.000353619		1.55766	0.000840835		1.5563	0.000488629		1.55728	0.00146677
1.56557	0.00134856		1.56369	0.00120238		1.56536	0.000822767		1.5604	0.00111146		1.56664	0.00158401		1.56439	0.000704695		1.55845	0.00153391		1.56556	0.000508003		1.56532	0.000476872		1.56399	0.000874675		1.55942	0.000590433		1.56216	0.00111017		1.56094	0.000343843		1.56391	0.00105669		1.56318	0.000732055		1.5629	0.000768844
1.56963	0.000831292		1.56806	0.00167576		1.57005	0.00120756		1.5679	0.000920083		1.57071	0.00143669		1.57001	0.000737048		1.56439	0.0016716		1.57149	0.000814572		1.5697	0.00138878		1.56836	0.00110614		1.56442	0.00112284		1.56623	0.00125734		1.56594	0.000386345		1.56797	0.000331392		1.57099	0.0013917		1.56727	0.0002221
1.57619	0.000802861		1.57556	0.00162559		1.57693	0.00161945		1.5754	0.00126582		1.57602	0.000785		1.57408	0.000294605		1.5722	0.00140536		1.57587	0.000248185		1.57626	0.00119615		1.57523	0.000674428		1.57224	0.00136164		1.57185	0.000906696		1.57344	0.000717863		1.5736	0.000410807		1.5763	0.00145722		1.57353	0.00108391
1.58432	0.000538175		1.58338	0.00191451		1.58474	0.00161096		1.58009	0.00133943		1.58415	0.000697875		1.58064	0.000392306		1.57876	0.00109714		1.58181	0.000369476		1.58439	0.000729359		1.58304	0.000978515		1.57942	0.00129498		1.57998	0.000466892		1.58094	0.00138515		1.58172	0.000872306		1.58036	0.000907295		1.58166	0.000686665
1.58994	0.000893841		1.58838	0.00167879		1.59036	0.00129633		1.58477	0.000831755		1.59102	0.000846075		1.58877	0.000280035		1.58282	0.00173076		1.58993	0.000351164		1.59001	0.00108653		1.58836	0.00134864		1.5838	0.00140479		1.58654	0.00080261		1.58563	0.000840057		1.5886	0.00125354		1.58693	0.00134551		1.58759	0.000869951
1.59369	0.000723253		1.59244	0.00150124		1.59443	0.00170599		1.59196	0.000969295		1.5954	0.00123245		1.5947	0.000663557		1.58814	0.00179645		1.59618	0.000266712		1.59407	0.000786849		1.59273	0.00158775		1.5888	0.00104453		1.5906	0.00132304		1.59032	0.000388683		1.59265	0.000739242		1.59505	0.00107076		1.59165	0.00158105
1.59932	0.000464071		1.59963	0.00139982		1.60099	0.0012389		1.59977	0.000687486		1.60039	0.00101682		1.59877	0.00105929		1.59626	0.00187671		1.60056	0.000673891		1.60064	0.000548949		1.59961	0.00166929		1.59661	0.000802057		1.59623	0.0013465		1.59782	0.000670685		1.59797	0.000999878		1.60099	0.000474414		1.59791	0.00080646
1.60713	0.000876966		1.60775	0.00155942		1.60911	0.00128157		1.60477	0.0008898		1.60852	0.000675109		1.60501	0.000577211		1.60314	0.00193914		1.60618	0.000669151		1.60876	0.000763681		1.60773	0.000546592		1.60411	0.00108293		1.60467	0.00137785		1.60532	0.000819443		1.6061	0.000778527		1.60474	0.00130331		1.60602	0.000785855
1.61307	0.00141422		1.61275	0.00128023		1.61505	0.00101142		1.60915	0.00133838		1.6154	0.00206429		1.61345	0.000791684		1.60751	0.00163158		1.61431	0.000647392		1.61439	0.000646769		1.61274	0.00132104		1.60786	0.000976792		1.61123	0.000912241		1.6097	0.000974151		1.61297	0.00081739		1.61099	0.00184524		1.61197	0.000254445
1.61744	0.00109855		1.6165	0.00200836		1.61911	0.00118754		1.61634	0.00151672		1.61946	0.00187231		1.61908	0.000667199		1.61251	0.00134293		1.62087	0.00101838		1.61814	0.000696966		1.61648	0.00173958		1.61224	0.00103353		1.61498	0.00138809		1.61376	0.00090891		1.61672	0.000601321		1.61942	0.00144834		1.61571	9.8711e-05
1.62307	0.00108424		1.62275	0.00197701		1.62536	0.00159559		1.62446	0.00120505		1.62415	0.00103718		1.62252	0.00143274		1.62064	0.00160504		1.62462	0.00119525		1.62376	0.000726141		1.62273	0.00121444		1.61942	0.00118173		1.61967	0.00135546		1.62063	0.000680248		1.62141	0.000345543		1.62536	0.000345594		1.62103	0.000572141
1.63057	0.000285046		1.63025	0.0017547		1.63349	0.00148761		1.62915	0.00152786		1.63133	0.000948524		1.62814	0.00109914		1.62782	0.00168748		1.62962	0.000926815		1.63126	0.000918134		1.63023	0.00110911		1.62661	0.0014613		1.62717	0.00072284		1.62782	0.000699799		1.62891	0.00028746		1.6288	0.00068297		1.62853	0.000978006
1.63776	0.000113175		1.63588	0.0014448		1.63943	0.00120412		1.6329	0.00139453		1.63821	0.00131257		1.63595	0.00103037		1.63189	0.00170031		1.63712	0.000640067		1.63751	0.000418952		1.63586	0.000360997		1.63161	0.00123868		1.63404	0		1.63313	0.000993915		1.63578	0.000109619		1.63443	0.00101946		1.63509	0.000389573
1.64244	0.00134085		1.64025	0.00101532		1.64286	0.00161379		1.63946	0.00122839		1.64321	0.00165559		1.6422	0.00113964		1.63626	0.00127268		1.64399	0.00115884		1.64189	0.000451773		1.64055	0.00074599		1.63599	0.000947885		1.63873	0.000447696		1.63751	0.000984989		1.64047	0.000638072		1.64224	0.00132174		1.63946	0.000441085
1.64744	0.00106516		1.64619	0.000999964		1.64849	0.00115681		1.64696	0.000853417		1.6479	0.00197169		1.64658	0.00142567		1.64345	0.00121939		1.64868	0.000971195		1.6472	0.000509049		1.64617	0.000661262		1.64286	0.00041354		1.64342	0.0010272		1.64407	0.00154304		1.64516	0.000667008		1.64849	0.00105122		1.64478	0.000906608
1.65494	0.000836795		1.65431	0.00115697		1.6563	0.000744312		1.65228	0.000608622		1.65477	0.00115758		1.65189	0.00120113		1.65064	0.000662984		1.65368	0.000952237		1.65501	0.000583701		1.65398	0.00105135		1.65067	0.000431014		1.6506	0.00080709		1.65219	0.00156897		1.65235	0.000726358		1.65286	0.000906406		1.65228	0.000856295
1.66244	0.00041638		1.66087	0.00121384		1.66255	0.0013123		1.65665	0.000456572		1.66258	0.00100697		1.6597	0.000859817		1.65564	0.00146083		1.66087	0.000581037		1.6622	0.000514412		1.66086	0.00114861		1.65661	0.00130663		1.65842	0.00063923		1.65813	0.000749952		1.66016	0.000982558		1.65818	0.00039379		1.65978	0.00144952
1.66713	0.00030614		1.66494	0.00105295		1.66693	0.00182024		1.6629	0.000907255		1.66821	0.00124843		1.66689	0.00113878		1.66001	0.00147431		1.66868	0.000463192		1.66689	0.000198428		1.66524	0.000937319		1.66067	0.00123393		1.66373	0.000998197		1.66219	0.000538716		1.66516	0.000518103		1.66568	0.000452648		1.66447	0.000855815
1.67182	0.00100408		1.67025	0.00070975		1.67255	0.00203478		1.67071	0.00168307		1.67227	0.00162319		1.67158	0.00106058		1.66689	0.0013649		1.67368	0.000531055		1.67157	0.000814736		1.67023	0.00114755		1.66692	0.000849731		1.66779	0.000996278		1.66813	0.00052724		1.66954	0.000987205		1.67286	0.00117493		1.66884	0.00031554
1.67932	0.000362819		1.67806	0.00190543		1.68036	0.00136548		1.67727	0.00120168		1.67852	0.00198089		1.67627	0.00102115		1.67501	0.00118002		1.67775	0.000549798		1.67907	0.000546161		1.67805	0.000808634		1.67505	0.00128873		1.67467	0.000914588		1.67626	0.000417797		1.6761	0.00123538		1.67755	0.00174551		1.67634	0.000955245
1.68713	0.000410327		1.68525	0.00143831		1.68755	0.00136346		1.68134	0.000742586		1.68665	0.00138481		1.68376	0.000914025		1.68032	0.00120851		1.68493	0.00114182		1.68657	0.000461212		1.68555	0.000768287		1.68099	0.00124709		1.68279	0.000966417		1.68251	0.00126125		1.68422	0.000773458		1.68255	0.00175751		1.68415	0.00125282
1.69151	0.000968863		1.68963	0.000560534		1.69193	0.00118734		1.68696	0.00142124		1.69258	0.000930136		1.69158	0.00101023		1.68439	0.00154718		1.69306	0.000857228		1.69157	0.000486525		1.68993	0.000740681		1.68505	0.00074791		1.6881	0.00155702		1.68688	0.00114012		1.69016	0.000895539		1.69005	0.00106166		1.68915	0.00100484
1.69557	0.00130582		1.69494	0.000603785		1.69693	0.00067536		1.69477	0.000574553		1.69665	0.000952902		1.69627	0.00115742		1.69095	0.000731501		1.69837	0.000773638		1.69595	0.000979486		1.69461	0.000853865		1.6913	0.000633577		1.69216	0.00155318		1.69251	0.000771415		1.69422	0.00121996		1.69755	0.00107898		1.69321	0.000705353
1.70244	0.000956573		1.70275	0.00115826		1.70443	0.0006056		1.70165	0.000777707		1.7029	0.00165121		1.70095	0.00143381		1.69907	0.000808936		1.70243	0.00118039		1.70345	0.00120795		1.70242	0.00092118		1.69942	0.000794938		1.69904	0.0012068		1.70032	0.000581431		1.70079	0.000987205		1.70224	0.00152608		1.7004	0.00043845
1.70963	0.000940064		1.70994	0.000920815		1.71193	0.00102194		1.70602	0.000335226		1.71133	0.00078916		1.70845	0.000868388		1.70501	0.000880064		1.70931	0.000846025		1.71126	0.00112557		1.70992	0.00117197		1.70536	0.000902799		1.70748	0.000990306		1.70688	0.00115776		1.70891	0.000824783		1.70661	0.00169265		1.70853	0.00116249
1.71494	0.000521667		1.714	0.000687043		1.71661	0.00101951		1.71133	0.000364248		1.71727	0.00090715		1.71595	0.000828107		1.70907	0.00198221		1.71743	0.000307861		1.71595	0.00112193		1.71399	0.000618155		1.70911	0.00117008		1.71279	0.00107434		1.71095	0.000888934		1.71453	0.000222617		1.71411	0.000874645		1.71322	0.00140783
1.71932	0.000739395		1.71838	0.00098634		1.72099	0.00080659		1.71915	0.000508517		1.72071	0.0013014		1.72033	0.000943378		1.71532	0.00182712		1.72243	0.00051856		1.7197	0.000888745		1.71836	0.000722844		1.71443	0.00092545		1.71623	0.000565645		1.71595	0.000775666		1.71828	0.000260002		1.72193	0.00143768		1.71696	0.00091739
1.72588	0.000968496		1.72556	0.000902433		1.72849	0.000923464		1.72634	0.00111735		1.72633	0.00116021		1.72439	0.00137896		1.72376	0.00183473		1.72618	0.000514682		1.72626	0.0010314		1.72555	0.00116453		1.72193	0.000999443		1.72217	0.000610436		1.72345	0.000634133		1.72391	0.000443968		1.72661	0.0016951		1.72352	0.000837127
1.73369	0.0012772		1.73275	0.00115048		1.7363	0.00124396		1.7304	0.00117918		1.73383	0.00103871		1.73127	0.00139268		1.7297	0.00155871		1.73243	0.000373354		1.73376	0.000583701		1.73273	0.000898883		1.72849	0.00112758		1.72998	0.00104022		1.73032	0.000930374		1.73141	0.000867236		1.73068	0.000873091		1.73102	0.00117854
1.73994	0.00107011		1.73775	0.000575455		1.74099	0.00112365		1.73477	0.000528286		1.7404	0.00142552		1.73877	0.000633561		1.73314	0.00176578		1.73993	0.000548936		1.73907	0.00116504		1.73774	0.000948786		1.73286	0.00110515		1.73592	0.000756327		1.7347	0.00120961		1.73766	0.00139358		1.73724	0.00049507		1.73665	0.00147492
1.74432	0.000750217		1.74212	0.0003765		1.74474	0.000410069		1.74196	0.000389695		1.74477	0.00030844		1.74408	0.000872673		1.73876	0.00155044		1.74556	0.000272098		1.74345	0.00103998		1.74211	0.00104817		1.73818	0.00132583		1.74029	0.00112404		1.73969	0.00100156		1.74203	0.00117962		1.74474	0.00107943		1.74103	0.00135392
1.74994	0.00121924		1.749	0.000416291		1.7513	0.000518046		1.74915	0.000498843		1.75008	0.00102667		1.74814	0.000474153		1.74626	0.00159612		1.74993	0.00044014		1.7497	0.00108331		1.74898	0.00109382		1.74568	0.00120524		1.74592	0.00130427		1.74688	0.00150628		1.74735	0.000981291		1.75005	0.00157027		1.74696	0.000893671
1.75807	0.00117173		1.75681	0.00157304		1.75911	0.000942269		1.75415	0.00097266		1.75758	0.00122697		1.7547	0.000956662		1.75282	0.00163549		1.75587	0.000702975		1.75782	0.000932721		1.75711	0.000491169		1.75286	0.00109091		1.75373	0.000929518		1.7547	0.00124383		1.75516	0.000778316		1.75443	0.00132085		1.75477	0.0011831
1.76463	0.000315862		1.76244	0.00139247		1.76443	0.000523303		1.75852	0.000846477		1.76508	0.00143603		1.76283	0.00089667		1.7572	0.00144669		1.76368	0.000551953		1.76407	0.000770546		1.76273	9.74693e-05		1.75786	0.000898485		1.76061	0.00104107		1.75969	0.000269464		1.76235	0.000827318		1.76068	0.00178838		1.76134	0.00115866
1.76869	0.000717934		1.7665	0.00104495		1.76849	0.000735415		1.7654	0.000317981		1.76977	0.00153191		1.76908	0.000990086		1.76251	0.00143777		1.77056	0.00136049		1.76814	0.00130877		1.7668	0.000465899		1.76224	0.000928038		1.76498	0.000833324		1.76376	0.000680036		1.76672	0.00059604		1.76849	0.00223437		1.76572	0.00123317
1.77432	0.00076159		1.77275	0.000617841		1.77505	0.00163482		1.77353	0.00111377		1.77414	0.00145683		1.77314	0.00132604		1.77001	0.00168574		1.77493	0.00108581		1.77376	0.000802938		1.77305	0.000411749		1.76943	0.00119553		1.76998	0.00090435		1.77063	0.000973513		1.77141	0.000429183		1.77474	0.00119559		1.77103	0.00126
1.78244	0.000277342		1.78088	0.000829772		1.78318	0.00167425		1.77884	0.00125194		1.78164	0.0013222		1.77877	0.00112528		1.7772	0.0017051		1.77993	0.000800999		1.78157	0.000724854		1.78117	0.000351654		1.77724	0.00115045		1.77779	0.000898378		1.77876	0.00126189		1.77922	0.00028936		1.77912	0.00168399		1.77915	0.000519191
1.78901	0.000971797		1.78713	0.00123482		1.78943	0.0015505		1.7829	0.000983175		1.78946	0.00112868		1.78689	0.00100637		1.78189	0.00194284		1.78774	0.00057285		1.78845	0.000379696		1.78711	0.00113268		1.78255	0.000682546		1.78529	0.00117267		1.78407	0.000881496		1.78672	0.000671865		1.78474	0.00200871		1.78602	0.000343572
1.79276	0.00118347		1.79088	0.000710831		1.79349	0.00132625		1.78946	0.000914826		1.79446	0.00145048		1.79345	0.00102887		1.78657	0.0015661		1.79525	0.000480858		1.79282	0.000403507		1.79117	0.00124395		1.78661	0.000949179		1.78967	0.00101782		1.78813	0.000736139		1.79141	0.00064483		1.79255	0.0013495		1.7904	0.00088217
1.79776	0.00128197		1.79712	0.000600109		1.79911	0.000677989		1.79758	0.000733964		1.79883	0.000982017		1.79752	0.000700409		1.79376	0.00211707		1.79962	0.000873602		1.79814	0.000637974		1.79742	0.00114925		1.7938	0.00126845		1.79435	0.00114281		1.79501	0.000862795		1.79609	0.000282813		1.79911	0.00135639		1.7954	0.000485409
1.80526	0.000791305		1.80525	0.000944387		1.80724	0.000430087		1.80352	0.000777917		1.80633	0.0016267		1.80314	0.000922166		1.80157	0.00213947		1.80431	0.00146649		1.80626	0.000790067		1.80586	0.00111293		1.80161	0.000723965		1.80216	0.00148045		1.80313	0.00107956		1.80359	0.000614627		1.80349	0.00181481		1.80321	0.000510327
1.81182	0.000216811		1.8115	0.000748892		1.8138	0.000962692		1.80759	0.00020715		1.81415	0.00182744		1.81127	0.00109957		1.80657	0.00127529		1.81212	0.000491199		1.81314	0.000630681		1.81211	0.00103755		1.80661	0.00127212		1.80966	0.00105109		1.80844	0.00147249		1.8111	0.000852452		1.8088	0.00195785		1.8104	0.000643778
1.81651	0.000519099		1.81494	0.000301892		1.81786	0.00134627		1.81384	0.000809463		1.81883	0.00214748		1.81783	0.00108672		1.81095	0.00143516		1.81962	0.000739599		1.81689	0.000385917		1.81555	0.000840911		1.81036	0.00100462		1.81404	0.0011652		1.81188	0.00125807		1.81578	0.000579566		1.81693	0.0021895		1.81447	0.000891514
1.82151	0.000863759		1.82025	0.000578699		1.82349	0.00135072		1.82227	0.00101977		1.82258	0.00188939		1.82189	0.00130462		1.81814	0.000960979		1.82368	0.00172394		1.82157	0.00096876		1.82117	0.00142679		1.81692	0.000715983		1.8181	0.00142627		1.81813	0.000932074		1.81953	0.000650111		1.8238	0.00190943		1.81884	0.000675165
1.82869	0.000581464		1.82806	0.00130315		1.83161	0.00146881		1.8279	0.000857833		1.82914	0.00192244		1.82658	0.000872887		1.82626	0.00166834		1.82806	0.00110649		1.82907	0.00150291		1.82867	0.00100676		1.82442	0.000805077		1.82497	0.000842709		1.82563	0.00107679		1.82641	0.000780217		1.82755	0.00090996		1.82603	0.000142556
1.83651	0.000993992		1.83431	0.00132824		1.83818	0.000493781		1.83134	0.000973922		1.83696	0.00154877		1.83408	0.0013554		1.83095	0.00182364		1.83524	0.0013536		1.83595	0.000879521		1.83523	0.000843884		1.83005	0.000907761		1.83248	0.00140793		1.83157	0.000387195		1.83391	0.001183		1.83224	0.00143946		1.83321	0.000998611
1.84151	0.000760673		1.83869	0.00140004		1.84193	0.000754826		1.83696	0.00133544		1.84227	0.00115802		1.84095	0.000967803		1.8347	0.00176905		1.84243	0.000592455		1.84064	0.000124205		1.83961	0.00158542		1.83442	0.00116555		1.83779	0.00132517		1.83595	0.000850895		1.83891	0.000905677		1.83974	0.00207023		1.8379	0.000714936
1.84588	0.000896042		1.844	0.00126769		1.84693	0.000955008		1.84477	0.00117729		1.84664	0.000872344		1.84564	0.00103315		1.84126	0.00139492		1.84743	0.00028007		1.84532	0.000301611		1.84492	0.00163213		1.84036	0.000708649		1.84216	0.00141219		1.84157	0.000959488		1.84359	7.89932e-05		1.84661	0.00143923		1.84259	0.000501701
1.85276	0.000620534		1.8515	0.00113837		1.85443	0.000978059		1.85102	0.000549947		1.8529	0.00119611		1.85033	0.00132669		1.84907	0.00137948		1.85181	0.00047935		1.85251	0.000959536		1.85242	0.00114521		1.84817	0.00142442		1.84872	0.00111444		1.84938	0.000800317		1.85016	0.000220717		1.8513	0.000873535		1.84946	0.000741291
1.86088	0.000659788		1.85869	0		1.8613	0.000452532		1.8554	0.00042124		1.86102	0.000606372		1.85752	0.000645345		1.85439	0.00120068		1.85868	0.000561647		1.86032	0.00114488		1.85992	0.000674428		1.85505	0.000889424		1.85685	0.0009517		1.85626	0.00110485		1.85797	0.000769234		1.85599	0.00102346		1.85728	0.00110235
1.86619	0.000724904		1.86337	0.00119957		1.86599	0.00035325		1.86071	0.000578128		1.86758	0.000972166		1.86533	0.00149916		1.85876	0.00153348		1.86649	0.000626279		1.86564	0.000693963		1.86492	0.000378198		1.85911	0.000709943		1.86248	0.00138639		1.86063	0.000604594		1.86391	0.00131142		1.86318	0.00112918		1.86291	0.00088792
1.87057	0.000818819		1.86806	0.00131245		1.87099	0.000641997		1.86821	0.000777497		1.87164	0.00094524		1.87064	0.000660129		1.86501	0.00141015		1.87243	0.000584915		1.87001	0.00107473		1.8693	0.000923091		1.86442	0.000896759		1.86654	0.00173746		1.86563	0.00106171		1.86828	0.000727414		1.87068	0.00140769		1.86696	0.00104246
1.87713	0.000821571		1.87556	0.000432294		1.87818	0.00130583		1.8754	0.000480546		1.87727	0.000998216		1.87501	0.000402377		1.87282	0.00108496		1.8765	0.000955684		1.87657	0.000571474		1.8768	0.00124523		1.87255	0.000757833		1.87248	0.000960445		1.87344	0.00109188		1.8739	0.000347655		1.8763	0.00149476		1.87353	0.000845992
1.88526	0.00140982		1.88337	0.000243071		1.88568	0.0011192		1.88008	0.00104942		1.88508	0.00113788		1.88158	0.000592638		1.87907	0.00158829		1.88274	0.000953529		1.8847	0.000491244		1.88461	0.00100357		1.87942	0.000860301		1.8806	0.000922266		1.88063	0.000526178		1.88203	0.000575553		1.88037	0.00138682		1.88165	0.00138124
1.89057	0.00096336		1.88838	0.000510362		1.89099	0.00107775		1.88509	0.0016959		1.89196	0.0012423		1.8897	0.000810538		1.88345	0.00114891		1.89087	0.000894715		1.89032	0.000241332		1.8893	0.00163574		1.8838	0.000790623		1.88717	0.00127974		1.88532	0.000198273		1.8886	0.000392643		1.88693	0.00147277		1.88759	0.00080047
1.89401	0.000966111		1.89275	0.000293458		1.89536	0.00071843		1.89259	0.000801682		1.89602	0.00106673		1.89533	0.00147945		1.88907	0.00115609		1.89712	0.000992524		1.89439	0.000999436		1.89368	0.000936045		1.8888	0.000986283		1.89123	0.0012004		1.89001	0.000847919		1.89297	0.000797114		1.89505	0.00150076		1.89165	0.00066606
1.90026	0.00111139		1.89994	0.0012692		1.90193	0.000959659		1.90009	0.0012021		1.90165	0.00119589		1.89939	0.00158187		1.89689	0.00135403		1.90118	0.0011164		1.90095	0.00134996		1.90086	0.000919906		1.89692	0.000773581		1.89685	0.000776802		1.89782	0.000557842		1.89859	0.000763109		1.90067	0.00139548		1.8979	0.000728593
1.90776	0.00109176		1.90775	0.00119265		1.91005	0.00130603		1.90477	0.000790325		1.90977	0.00109716		1.90595	0.00101901		1.90376	0.00124962		1.90712	0.0011569		1.90907	0.00108546		1.90899	0.00107832		1.9038	0.00123889		1.90529	0.00112148		1.90532	0.00023695		1.90672	0.000421579		1.90474	0.00154651		1.90603	0.00088816
1.91369	0.00109414		1.91244	0.00122552		1.91568	0.000919622		1.90946	0.000267928		1.91664	0.00144588		1.91408	0.0013629		1.90814	0.00150368		1.91556	0.000706422		1.9147	0.000782344		1.91367	0.00115264		1.90786	0.00117936		1.91185	0.00134799		1.90938	0.0004773		1.91328	0.00068834		1.9113	0.00110408		1.91196	0.00109181
1.91807	0.00091787		1.91619	0.000872374		1.91974	0.000994842		1.91696	0.000670872		1.92039	0.00103127		1.9197	0.00136225		1.91345	0.00131683		1.92149	0.00137277		1.91845	0.00124999		1.91743	0.000420031		1.91224	0.00107581		1.91529	0.00197208		1.91344	0.000802867		1.91703	0.00087653		1.91943	0.00146344		1.91572	0.000707988
1.92369	0.00112624		1.92275	0.0015618		1.9263	0.00131594		1.92477	0.000937118		1.92508	0.000688024		1.92314	0.000728049		1.92157	0.0010208		1.92524	0.00137277		1.92407	0.00111678		1.92367	0.000690779		1.91974	0.00103935		1.92029	0.00155851		1.92063	0.000869808		1.92172	0.000542815		1.92505	0.00158182		1.92134	0.000787532
1.93151	0.000643096		1.93056	0.00116929		1.93443	0.00134829		1.92915	0.00108454		1.93227	0.00130337		1.92908	0.000805396		1.92845	0.00137382		1.93024	0.00143546		1.93189	0.000723567		1.93149	0.000985311		1.92661	0.00103504		1.9281	0.00141689		1.92782	0.000854507		1.92922	0.000535845		1.9288	0.00134284		1.92884	0.00110499
1.93838	0.001554		1.93588	0.0004031		1.94005	0.000986147		1.93321	0.00111125		1.93946	0.00171864		1.93658	0.000617492		1.9322	0.00123418		1.93806	0.000837623		1.93782	0.000756817		1.93711	0.000782939		1.93161	0.000506517		1.93498	0.00147938		1.93313	0.000872146		1.9361	0.000532677		1.93443	0.00143546		1.93509	0.000737937
1.94276	0.000686568		1.94025	0.000572644		1.94349	0.00107087		1.93977	0.000521556		1.94414	0.000680801		1.94252	0.000826608		1.93689	0.00161526		1.94462	0.000567249		1.9422	0.00102432		1.94148	0.00102162		1.93599	0.000785446		1.93935	0.00147063		1.93751	0.00141277		1.94078	0.000422424		1.94193	0.00191409		1.93947	0.00112631
1.94807	0.000557986		1.9465	0.00104149		1.94943	0.00045334		1.94727	0.000875499		1.94883	0.00100982		1.94689	0.000934594		1.94439	0.00132597		1.94931	0.00111554		1.94782	0.000853564		1.94742	0.000919694		1.94286	0.00135625		1.94435	0.000790666		1.94407	0.000918686		1.94547	0.000133908		1.94818	0.00145634		1.94478	0.000766448
1.95588	0.000530838		1.95431	0.000684015		1.95724	0.000258821		1.95259	0.000822082		1.95602	0.00132242		1.95251	0.00128512		1.95126	0.00145474		1.95431	0.000935648		1.95564	0		1.95555	0.000808846		1.95067	0.000693548		1.95185	0.000454094		1.95219	0.000370407		1.95266	0.000167069		1.95255	0.00100347		1.95228	0.00132373
1.96307	0.000990507		1.96056	0.000796036		1.96318	0.000650085		1.95696	0.000730178		1.96383	0.00159211		1.96033	0.00133826		1.95626	0.000962067		1.96181	0.00139884		1.96282	0.000655994		1.96211	0.00111506		1.9563	0.000396067		1.95935	0.00111209		1.95782	0.000595244		1.96047	0.000353146		1.95818	0.000800907		1.95978	0.00122287
1.96776	0.00114238		1.96494	0.00118119		1.96755	0.00076433		1.96321	0.0011756		1.96914	0.00141107		1.96752	0.00104558		1.96095	0.001453		1.96931	0.00129392		1.9672	0.000435899		1.96617	0.00107259		1.96068	0.000692469		1.96436	0.00166942		1.96219	0.000653472		1.96547	0.000560557		1.96599	0.00116427		1.96447	0.00088217
1.97244	0.000426285		1.97056	0.00125147		1.97318	0.000879788		1.97102	0.00145783		1.97321	0.00131038		1.97189	0.000746475		1.96782	0.00211207		1.974	0.00107762		1.97189	0.000661786		1.97149	0.00080375		1.96692	0.000382908		1.96873	0.00102763		1.96844	0.00095205		1.96984	0.000687495		1.97318	0.00133795		1.96915	0.0011438
1.98026	0.000506993		1.97838	0.00194457		1.98099	0.00141563		1.97727	0.00133523		1.97977	0.00109256		1.97689	0.00102051		1.97564	0.00105864		1.97868	0.00102549		1.9797	0.000754028		1.9793	0.00136606		1.97505	0.0010661		1.97591	0.00083759		1.97626	0.00157683		1.97672	0.00115617		1.97755	0.00106166		1.97634	0.00152834
1.98776	0.000917503		1.98525	0.0012106		1.98786	0.000757253		1.98165	0.000554784		1.9879	0.00114663		1.9847	0.000614278		1.98126	0.00169074		1.98587	0.000788288		1.9872	0.000656637		1.98617	0.00105985		1.98099	0.00103892		1.98373	0.00100716		1.98251	0.000873421		1.98484	0.000938415		1.98255	0.00181148		1.98415	0.00118118
1.99182	0.00105251		1.98931	0.000298216		1.99224	0.00120877		1.98727	0.000649842		1.99383	0.00117728		1.99189	0.000867745		1.98532	0.00194588		1.99368	0.000928538		1.99157	0.000475156		1.99055	0.000544469		1.98505	0.000939687		1.98904	0.00135461		1.98657	0.00114969		1.99016	0.000645042		1.99005	0.00154784		1.98915	0.00105803
1.99588	0.00137277		1.99463	0.00077441		1.99724	0.00100192		1.9954	0.00119895		1.9979	0.000968225		1.99658	0.00147774		1.99189	0.00161135		1.99868	0.000557123		1.99626	0.00099965		1.99586	0.000930311		1.9913	0.000613084		1.99342	0.0009517		1.99251	0.000533403		1.99453	0.000612304		1.99755	0.00202337		1.99353	0.00123724
2.00307	0.00126546		2.00275	0.00093898		2.00505	0.00120028		2.00196	0.00104585		2.00414	0.00186465		2.00127	0.00150238		2.00001	0.00102341		2.00306	0.000733351		2.00407	0.000734292		2.00367	0.00100527		1.99974	0.000769051		2.00029	0.00154251		2.00063	0.000733376		2.00141	0.000426648		2.00224	0.00133929		2.00072	0.00118932
2.01026	0.00122438		2.00994	0.00135787		2.01255	0.00119927		2.00602	0.000635541		2.01227	0.00165231		2.00877	0.00182248		2.00595	0.00119372		2.01025	0.000887605		2.01157	0.000561177		2.01086	0.00115392		2.00567	0.00113103		2.00842	0.00124561		2.00688	0.00117731		2.00953	0.00061695		2.00693	0.00131841		2.00853	0.0011426
2.01557	0.000541294		2.01369	0.00124887		2.01724	0.000982103		2.01165	0.00074511		2.01789	0.00124624		2.01658	0.001085		2.01001	0.00192174		2.01837	0.000932632		2.01595	0.000410371		2.01492	0.000797804		2.00911	0.00120524		2.01373	0.00114622		2.01063	0.0010158		2.01484	0.000718332		2.01443	0.00114139		2.01321	0.000424074
2.01994	0.00106241		2.01838	0.000189223		2.02193	0.000952379		2.01977	0.000490851		2.02165	0.00162341		2.02095	0.000956233		2.01657	0.00190912		2.02306	0.00112502		2.02001	0.00031105		2.01929	0.000815005		2.01474	0.000632499		2.01717	0.000564365		2.01563	0.0011329		2.01828	0.000643563		2.02192	0.00133818		2.01697	0.00029781
2.02651	0.000817535		2.02588	0.000434673		2.02943	0.000665654		2.02665	0.000520925		2.02727	0.00147237		2.02502	0.000575926		2.0247	0.00196981		2.02681	0.0012448		2.02689	0.000570187		2.0268	0.000494566		2.02224	0.000737987		2.02342	0.000994358		2.02313	0.00110251		2.02422	0.000202341		2.0263	0.00127088		2.02353	0.000919307
2.03432	0.00113211		2.03275	0.000654821		2.03693	0.000725102		2.0304	0.000880336		2.03508	0.00169084		2.03189	0.000162622		2.03064	0.00131052		2.03306	0.000732274		2.03439	0.00122125		2.03399	0.000542133		2.0288	0.000725475		2.03123	0.00109759		2.03001	0.00129122		2.03203	0.000610191		2.03036	0.00121247		2.03103	0.00117447
2.04026	0.00118732		2.03744	0.000647468		2.0413	0.000814476		2.03509	0.000753312		2.04133	0.00149798		2.03908	0.000635061		2.03407	0.00140253		2.04087	0.00103195		2.03939	0.000627248		2.03867	0.000479914		2.03286	0.000697862		2.03716	0.0011667		2.03438	0.00118985		2.03797	0.000790144		2.03724	0.00131841		2.03665	0.000868034
2.04432	0.00102994		2.04213	0.00100386		2.04568	0.00134101		2.04259	0.000574342		2.04571	0.00109804		2.04439	0.000557499		2.0397	0.00110932		2.04649	0.00124243		2.04407	0.000324135		2.04336	0.00109658		2.03818	0.00137005		2.04154	0.000960872		2.03938	0.000688536		2.04235	0.00025958		2.04443	0.00151208		2.04103	0.00121328
2.05057	0.000975649		2.04931	0.000765327		2.05255	0.00121444		2.04946	0.000877812		2.05133	0.00056675		2.04877	0.000808824		2.04751	0.00116153		2.05056	0.00158799		2.05064	0.000589279		2.05024	0.000745566		2.04599	0.00120826		2.04748	0.00118291		2.04688	0.000314091		2.04797	0.00055422		2.04974	0.00149165		2.04728	0.00166683
2.05869	0.000667675		2.05681	0.000752136		2.05974	0.00117683		2.05446	0.000672344		2.05914	0.00103368		2.05533	0.000505649		2.05376	0.0011339		2.0565	0.00130232		2.05845	0.000686455		2.05836	0.000954095		2.05317	0.0012609		2.05529	0.00171698		2.05438	0.00043671		2.05578	0.000756984		2.05443	0.00161336		2.05509	0.00168935
2.06494	0.000503141		2.06244	0.0010882		2.06505	0.000934383		2.05915	0.000230284		2.06633	0.000629357		2.06345	0.000985587		2.05814	0.000850482		2.06462	0.00109486		2.06438	0.00120387		2.06367	0.000834328		2.05786	0.000724396		2.06185	0.001422		2.05938	0.000907635		2.06266	0.000694887		2.06099	0.000831779		2.06134	0.00125449
2.06901	0.00040464		2.0665	0.00127136		2.06943	0.000797087		2.06602	0.000416193		2.07071	0.00109125		2.06939	0.00151052		2.06376	0.00123788		2.07118	0.00110175		2.06845	0.00113866		2.06773	0.00074323		2.06255	0.000835925		2.06623	0.00127142		2.06376	0.00111207		2.06703	0.000746423		2.0688	0.000736941		2.06572	0.00146437
2.07494	0.000906864		2.07306	0.00118616		2.07599	0.000836921		2.07384	0.00067634		2.07571	0.000794632		2.07345	0.00167657		2.07126	0.00148519		2.07556	0.0012071		2.07439	0.000590995		2.07429	0.000859174		2.06974	0.00088511		2.07154	0.000906269		2.07095	0.000592056		2.07235	0.000130106		2.07474	0.000731166		2.07134	0.00117998
2.08307	0.00130729		2.08088	0.000488088		2.0838	0.000347993		2.07915	0.000355415		2.08321	0.000906931		2.07939	0.00126434		2.07845	0.00178471		2.08087	0.00155589		2.08251	0.000658568		2.08273	0.000601592		2.07755	0.000808528		2.07935	0.00107264		2.07876	0.000531703		2.08016	0.000279222		2.0788	0.00142835		2.07915	0.00130241
2.08932	0.000715733		2.08681	0.000703695		2.09005	0.00057992		2.08352	0.000459516		2.09071	0.00114598		2.08752	0.000361453		2.08314	0.00180428		2.08868	0.000830514		2.08907	0.000763252		2.08868	0.000734523		2.08255	0.000581372		2.08654	0.00121938		2.08407	0.000864495		2.08734	0.00038694		2.08474	0.00136394		2.08603	0.00139346
2.09307	0.00118898		2.09087	0.000554911		2.09411	0.000849862		2.09008	0.000284542		2.0954	0.0014253		2.09408	0.00100723		2.08782	0.00201266		2.09587	0.000660964		2.09313	0.000633469		2.09242	0.000769349		2.08692	0.00093149		2.09091	0.00192622		2.08813	0.000927186		2.09172	0.000300977		2.09286	0.00125267		2.0904	0.00153218
2.09807	0.00137387		2.09713	0.00102094		2.10005	0.000669294		2.09821	0.000481388		2.10008	0.00101967		2.09783	0.000815252		2.09564	0.00185431		2.10024	0.000708576		2.09876	0.00103805		2.09867	0.00109786		2.09442	0.0011498		2.0956	0.00169992		2.09532	0.00132161		2.09641	0.000386729		2.09912	0.00230877		2.09572	0.00140831
2.10557	0.00111395		2.10556	0.000830636		2.10818	0.00051663		2.10384	0.000428181		2.10758	0.00111599		2.10377	0.000979159		2.10314	0.00114761		2.10524	0.000910657		2.1072	0.00111742		2.10711	0.0013221		2.10224	0.00143002		2.10342	0.00157856		2.10313	0.00109443		2.10422	0.000489378		2.10349	0.00164468		2.10384	0.00155853
2.11213	0.00119705		2.11119	0.00062541		2.11443	0.000832068		2.1079	0.000257623		2.1154	0.000873439		2.1122	0.000890242		2.10782	0.000660592		2.11337	0.000722795		2.11376	0.000988924		2.11304	0.000957492		2.10692	0.00141514		2.11092	0.00146061		2.10813	0.00158172		2.11172	0.000806196		2.10911	0.00144301		2.11072	0.00105659
2.11682	0.000919337		2.11463	0.000647468		2.1188	0.000670305		2.11446	0.000952681		2.11977	0.00102033		2.11845	0.000539502		2.1122	0.00129138		2.12024	0.000677768		2.1172	0.000860429		2.11648	0.000843035		2.11067	0.000957161		2.11498	0.00108501		2.11188	0.00125169		2.11609	0.000681159		2.11724	0.00131885		2.11446	0.00128899
2.12213	0.000402623		2.12056	0.000536962		2.12443	0.000864421		2.12259	0.00012408		2.12383	0.000862275		2.12189	0.000791041		2.1197	0.00132662		2.12431	0.00101062		2.12219	0.000711983		2.12211	0.00138644		2.11723	0.00102015		2.11935	0.00138852		2.11813	0.00127188		2.12016	0.000683693		2.1238	0.00137949		2.11915	0.00153889
2.12932	0.000106755		2.12838	0.000670824		2.13255	0.000596703		2.12821	0.000134385		2.13071	0.000585576		2.12689	0.00155273		2.12751	0.00108453		2.12868	0.000958269		2.1297	0.000648486		2.12992	0.00119766		2.12474	0.00132518		2.12654	0.00115539		2.12595	0.000965863		2.12703	0.000852663		2.12755	0.000845106		2.12665	0.00134194
2.13682	0		2.13431	0.000374338		2.13911	0.000322515		2.13196	0.000367402		2.1379	0.000450073		2.1347	0.00132797		2.1322	0.00171619		2.13587	0.00107654		2.13657	0.00108095		2.13618	0.00112716		2.13036	0.000882737		2.13373	0.00109247		2.13157	0.000269889		2.13453	0.000513245		2.13255	0.00142613		2.13353	0.00131846
2.14182	0.000152611		2.13869	0.000464733		2.14255	0.000895762		2.13758	0.000609674		2.14321	0.00117794		2.14127	0.000804539		2.13595	0.00143647		2.14306	0.00109615		2.14126	0.000910197		2.14055	0.000674853		2.13474	0.000849516		2.13873	0.000961512		2.13594	0.000664735		2.13984	0.000903143		2.14005	0.0016198		2.13821	0.000899421
2.14619	0.000889439		2.14431	0.000726618		2.14755	0.0010367		2.14508	0.000789064		2.1479	0.00112978		2.14595	0.000153194		2.14251	0.00184844		2.14806	0.000916259		2.14626	0.00100244		2.14586	0.000514103		2.14067	0.00101088		2.14311	0.00129296		2.14188	0.000421197		2.14422	0.000545349		2.14692	0.00102412		2.1429	0.000850305
2.15338	0.00139606		2.15181	0.000237232		2.15536	0.000765947		2.15134	0.00108664		2.15415	0.00171273		2.15095	0.000361025		2.15001	0.00125354		2.15274	0.000838485		2.15344	0.000629608		2.15367	0.00068993		2.1488	0.00119812		2.14998	0.0011042		2.14969	0.00122215		2.15078	0.000401725		2.1513	0.00143857		2.14978	0.0018597
2.16119	0.00117669		2.159	0.000638818		2.16193	0.00113537		2.15571	0.00053838		2.16227	0.00135241		2.15814	0.000705337		2.15532	0.00133271		2.15962	0.00156494		2.16095	0.00105092		2.16086	0.000767013		2.15505	0.00114247		2.15779	0.00113321		2.15626	0.00116987		2.15891	0.000434041		2.1563	0.00170665		2.15759	0.00150367
2.16651	0.000772596		2.16369	0.0011641		2.16661	0.00137458		2.16102	0.00109632		2.16852	0.00153519		2.16595	0.00152059		2.1597	0.00152304		2.16743	0.00128336		2.16595	0.00139029		2.16555	0.00118641		2.15943	0.00079127		2.16341	0.00163849		2.16063	0.00072615		2.16453	0.000667852		2.16349	0.00140392		2.1629	0.00138267
2.17057	0.00114404		2.16869	0.0010882		2.17161	0.000434738		2.16883	0.000565299		2.17258	0.00183006		2.17095	0.000904812		2.16626	0.00173055		2.17306	0.00142146		2.17032	0.000741371		2.17023	0.00138071		2.16474	0.00037924		2.16779	0.00126737		2.16594	0.000751439		2.1686	0.000176784		2.1713	0.00194474		2.16728	0.00102281
2.17776	0.000705461		2.17619	0.000528312		2.1788	0		2.17602	0.000923448		2.17821	0.00101026		2.17533	0.000257967		2.17407	0.00167595		2.17743	0.00117694		2.1772	0.000849917		2.17773	0.00118343		2.17286	0.000236648		2.17404	0.000801757		2.17376	0.000386558		2.17485	0.000367931		2.1763	0.00167022		2.17384	0.0013108
2.18588	0.000538542		2.18369	0.000397261		2.18661	0.000691334		2.1804	0.00131924		2.18633	0.000943708		2.1822	0.000834107		2.18032	0.00100992		2.18368	0.00125385		2.18532	0.000925213		2.18555	0.000929887		2.17973	0.000708433		2.18185	0.00108629		2.18094	0.000582281		2.18297	0.000741354		2.18068	0.000718506		2.18197	0.000926495
2.19088	0.000281377		2.18837	0.000590161		2.19161	0.00119765		2.1854	0.000663512		2.1929	0.000845419		2.19002	0.000858746		2.18439	0.00126833		2.19181	0.000880927		2.19063	0.00083533		2.19024	0.000744716		2.1838	0.00105661		2.1881	0.00131728		2.18532	0.00109932		2.18922	0.000715797		2.18755	0.00145833		2.1879	0.00105372
2.19463	0.000305223		2.19275	0.000593405		2.19599	0.001046		2.1929	0.0010898		2.19696	0.00068693		2.19533	0.000473082		2.19001	0.00158068		2.19775	0.00100523		2.19501	0.000826535		2.19461	0.000751299		2.18911	0.000746831		2.19216	0.00111913		2.19032	0.00127719		2.19329	0.000366242		2.19568	0.00139792		2.19196	0.00140927
2.20088	0.000766542		2.20025	0.000941576		2.20286	0.000468506		2.2004	0.00142881		2.20258	0.0012064		2.1997	0.00104815		2.19814	0.00157045		2.2018	0.000728181		2.20188	0.000527712		2.20211	0.0011467		2.19724	0.000630126		2.19842	0.00160373		2.19813	0.000930374		2.19922	0.000575342		2.20099	0.00119203		2.19853	0.00174685
2.20838	0.00148393		2.20806	0.00036785		2.21099	0.000438782		2.20509	0.00101241		2.21071	0.000375863		2.20689	0.00135047		2.2047	0.00145865		2.20806	0.00123231		2.2097	0.00118692		2.20992	0.000857687		2.20442	0.000748557		2.20654	0.00162036		2.20532	0.000845794		2.20703	0.000316396		2.20505	0.00142569		2.20666	0.00159591
2.21401	0.000716283		2.21244	0.000517283		2.2163	0.0013125		2.20977	0.000615141		2.21727	0.000651248		2.2147	0.00107665		2.20907	0.0010221		2.21618	0.00133852		2.21501	0.000519775		2.2143	0.00120934		2.20817	0.000777464		2.21248	0.00169523		2.20938	0.00133266		2.2136	0.000831119		2.21193	0.00138748		2.21228	0.000983996
2.21838	0.000634658		2.2165	0.000528744		2.22068	0.00135476		2.21727	0.00102292		2.22102	0.00157547		2.22002	0.00113964		2.2147	0.00110193		2.22243	0.00100286		2.21876	0.000623602		2.21836	0.00133208		2.21255	0.000614594		2.21623	0.00105643		2.21376	0.00105002		2.21735	0.000272252		2.22005	0.00160159		2.21571	0.000836409
2.22432	0.0011013		2.22306	0.000124131		2.22755	0.00150541		2.22509	0.000662881		2.22602	0.00165078		2.22345	0.000654344		2.22282	0.00116805		2.22587	0.00050908		2.22501	0.000694392		2.22492	0.000992955		2.22005	0.000492063		2.22154	0.00152246		2.22094	0.00067026		2.22235	0.000215225		2.22536	0.00177017		2.22134	0.000847669
2.23213	0.000625854		2.23056	0.000822419		2.23536	0.0014678		2.22946	0.000555835		2.23352	0.00122566		2.2297	0.00112464		2.22939	0.00122874		2.23118	0.000762436		2.23251	0.000896682		2.23242	0.00113183		2.22692	0.000821256		2.22904	0.00184005		2.22813	0.000479425		2.23016	0.000283447		2.2288	0.00187944		2.22916	0.00105228
2.23869	0.000222864		2.23588	0.000456515		2.24068	0.00092124		2.23352	0.00101304		2.2404	0.00165953		2.2372	0.000616206		2.23314	0.0013736		2.23899	0.00104918		2.23845	0.0009398		2.23774	0.00139982		2.23161	0.00131375		2.2356	0.00154529		2.23282	0.000879796		2.23672	0.000169392		2.23505	0.00149587		2.2354	0.00151085
2.24307	0.00054001		2.24025	0.000418454		2.24411	0.00012476		2.2404	0.00105194		2.24508	0.00147062		2.24314	0.000457227		2.23814	0.00114956		2.24524	0.000851196		2.24282	0.00109318		2.24211	0.000850467		2.2363	0.00138774		2.24029	0.00214484		2.23719	0.000590993		2.24109	0.000575764		2.24255	0.00127532		2.23978	0.00117423
2.24838	0.00037841		2.24681	0.000485926		2.25036	0.000851277		2.24759	0.000592429		2.24977	0.00147434		2.2472	0.000495365		2.24532	0.00133576		2.24962	0.00106103		2.24845	0.00109082		2.24867	0.00102544		2.24349	0.00128247		2.24529	0.00169075		2.24407	0.00038932		2.2461	3.80181e-05		2.24849	0.00180748		2.24509	0.00105755
