# Supplementary material for: Binding and sequestration of poison frog alkaloids by a plasma globulin
Source: eLife journal article supplement (doi:10.7554/elife.85096), 2023-12-14
Supplement: fig5-data1 [file OsABG+PTX_R1 analysis_DoseResponseRawDataGrouped.xlsx]

## Sheet: RawData
NanoTemper Technologies	NanoTemper Technologies
MO.Affinity Analysis v3.0.5	MO.Affinity Analysis v3.0.5
Origin of exported data	Origin of exported data
Project Title:	20230407_BSA+PTX
Comment:
Project File Path:	C:\Users\nanotemper\Desktop\Aurora_MST\20230407_BSA\BSA+PTX analysis.nta3
Analysis-Set Name:	OsABG+PTX
Exported from:	Dose-Response (Grouped)
Exported on:	2023-04-11 08:17:38
Analysis Settings	Analysis Settings
Type of Analysis:	MST
Evaluation strategy:	On Time
Cold Region Start:	-1
Cold Region End:	0
Hot Region Start:	4
Hot Region End:	5
Sample Information	Sample Information
Merge-Set Name:	OsABG+PTX_R1 (#20)
Date of Measurement:	2023-04-11 07:37:51.355 → 2023-04-11 07:44:31.302
Capillary Type:	Monolith Premium Capillary
Target:	OsABG
TargetConcentration:	5e-09
Ligand:	PTX
Measurement Settings	Measurement Settings
MST-Power:	Medium
Excitation-Power:	15
Excitation type:	Pico - RED
Thermostat Setpoint:	25
Fit Results (Kd)	Fit Results (Kd)
Fit Model:	Kd
Bound	912.209
Unbound	900.7
Kd	3.23887e-05
TargetConc	5e-09
Standard Deviation:	3.21007
Lower Kd Confidence:	5.36608e-06
Upper Kd Confidence:	0.000195493
Dose Response Curve	Dose Response Curve	Dose Response Curve
Ligand Concentration [M]	Fnorm [‰]	Error Value
0.001	907.645	0
0.0005	908.52	0
0.00025	918.337	0
0.000125	912.755	0
6.25e-05	906.731	0
3.125e-05	905.04	0
1.5625e-05	903.93	0
7.8125e-06	901.427	0
3.90625e-06	902.133	0
1.95313e-06	902.195	0
9.76563e-07	900.804	0
4.88281e-07	901.975	0
2.44141e-07	902.665	0
1.2207e-07	902.6	0
6.10352e-08	901.924	0
3.05176e-08	895.585	0

## Sheet: Fit-Values
Dose	FNorm
0.000933033
0.000870551
0.000812252
0.000757858
0.000707107
0.000659754
0.000615572
0.000574349
0.000535887
0.0005
0.000466516
0.000435275
0.000406126
0.000378929
0.000353553
0.000329877
0.000307786
0.000287175
0.000267943
0.00025
0.000233258
0.000217638
0.000203063
0.000189465
0.000176777
0.000164938
0.000153893
0.000143587
0.000133972
0.000125
0.000116629
0.000108819
0.000101532
9.47323e-05
8.83883e-05
8.24692e-05
7.69465e-05
7.17936e-05
6.69858e-05
6.25e-05
5.83146e-05
5.44094e-05
5.07658e-05
4.73661e-05
4.41942e-05
4.12346e-05
3.84733e-05
3.58968e-05
3.34929e-05
3.125e-05
2.91573e-05
2.72047e-05
2.53829e-05
2.36831e-05
2.20971e-05
2.06173e-05
1.92366e-05
1.79484e-05
1.67465e-05
1.5625e-05
1.45786e-05
1.36024e-05
1.26914e-05
1.18415e-05
1.10485e-05
1.03087e-05
9.61832e-06
8.97421e-06
8.37323e-06
7.8125e-06
7.28932e-06
6.80118e-06
6.34572e-06
5.92077e-06
5.52427e-06
5.15433e-06
4.80916e-06
4.4871e-06
4.18662e-06
3.90625e-06
3.64466e-06
3.40059e-06
3.17286e-06
2.96038e-06
2.76214e-06
2.57716e-06
2.40458e-06
2.24355e-06
2.09331e-06
1.95312e-06
1.82233e-06
1.70029e-06
1.58643e-06
1.48019e-06
1.38107e-06
1.28858e-06
1.20229e-06
1.12178e-06
1.04665e-06
9.76562e-07
9.11165e-07
8.50147e-07
7.93215e-07
7.40096e-07
6.90534e-07
6.44291e-07
6.01145e-07
5.60888e-07
5.23327e-07
4.88281e-07
4.55583e-07
4.25074e-07
3.96608e-07
3.70048e-07
3.45267e-07
3.22145e-07
3.00572e-07
2.80444e-07
2.61663e-07
2.44141e-07
2.27791e-07
2.12537e-07
1.98304e-07
1.85024e-07
1.72633e-07
1.61073e-07
1.50286e-07
1.40222e-07
1.30832e-07
1.2207e-07
1.13896e-07
1.06268e-07
9.91519e-08
9.2512e-08
8.63167e-08
8.05364e-08
7.51431e-08
7.0111e-08
6.54159e-08
6.10352e-08
5.69478e-08
5.31342e-08
4.9576e-08
4.6256e-08
4.31584e-08
4.02682e-08
3.75715e-08
3.50555e-08
3.27079e-08
3.05176e-08
