# Supplementary material for: Binding and sequestration of poison frog alkaloids by a plasma globulin
Source: eLife journal article supplement (doi:10.7554/elife.85096), 2023-12-14
Supplement: fig5-data1 [file OsABG+PTX_R1 analysis_MSTTraceRawData.xlsx]

## Sheet: RawData
NanoTemper Technologies	NanoTemper Technologies
MO.Affinity Analysis v3.0.5	MO.Affinity Analysis v3.0.5
Origin of exported data	Origin of exported data
Project Title:	20230407_BSA+PTX
Comment:
Project File Path:	C:\Users\nanotemper\Desktop\Aurora_MST\20230407_BSA\BSA+PTX analysis.nta3
Analysis-Set Name:	OsABG+PTX
Exported from:	MST Traces
Exported on:	2023-04-11 08:18:08
Analysis Settings	Analysis Settings
Type of Analysis:	MST
Evaluation strategy:	On Time
Cold Region Start:	-1
Cold Region End:	0
Hot Region Start:	4
Hot Region End:	5
Sample Information	Sample Information		Sample Information	Sample Information		Sample Information	Sample Information		Sample Information	Sample Information		Sample Information	Sample Information		Sample Information	Sample Information		Sample Information	Sample Information		Sample Information	Sample Information		Sample Information	Sample Information		Sample Information	Sample Information		Sample Information	Sample Information		Sample Information	Sample Information		Sample Information	Sample Information		Sample Information	Sample Information		Sample Information	Sample Information		Sample Information	Sample Information
Merge-Set Name:	OsABG+PTX_R1 (#20)		Merge-Set Name:	OsABG+PTX_R1 (#20)		Merge-Set Name:	OsABG+PTX_R1 (#20)		Merge-Set Name:	OsABG+PTX_R1 (#20)		Merge-Set Name:	OsABG+PTX_R1 (#20)		Merge-Set Name:	OsABG+PTX_R1 (#20)		Merge-Set Name:	OsABG+PTX_R1 (#20)		Merge-Set Name:	OsABG+PTX_R1 (#20)		Merge-Set Name:	OsABG+PTX_R1 (#20)		Merge-Set Name:	OsABG+PTX_R1 (#20)		Merge-Set Name:	OsABG+PTX_R1 (#20)		Merge-Set Name:	OsABG+PTX_R1 (#20)		Merge-Set Name:	OsABG+PTX_R1 (#20)		Merge-Set Name:	OsABG+PTX_R1 (#20)		Merge-Set Name:	OsABG+PTX_R1 (#20)		Merge-Set Name:	OsABG+PTX_R1 (#20)
Run Name:	OsABG+PTX_R1 (#20)		Run Name:	OsABG+PTX_R1 (#20)		Run Name:	OsABG+PTX_R1 (#20)		Run Name:	OsABG+PTX_R1 (#20)		Run Name:	OsABG+PTX_R1 (#20)		Run Name:	OsABG+PTX_R1 (#20)		Run Name:	OsABG+PTX_R1 (#20)		Run Name:	OsABG+PTX_R1 (#20)		Run Name:	OsABG+PTX_R1 (#20)		Run Name:	OsABG+PTX_R1 (#20)		Run Name:	OsABG+PTX_R1 (#20)		Run Name:	OsABG+PTX_R1 (#20)		Run Name:	OsABG+PTX_R1 (#20)		Run Name:	OsABG+PTX_R1 (#20)		Run Name:	OsABG+PTX_R1 (#20)		Run Name:	OsABG+PTX_R1 (#20)
Date of Measurement:	2023-04-11 07:44:31		Date of Measurement:	2023-04-11 07:44:04		Date of Measurement:	2023-04-11 07:43:37		Date of Measurement:	2023-04-11 07:43:11		Date of Measurement:	2023-04-11 07:42:44		Date of Measurement:	2023-04-11 07:42:18		Date of Measurement:	2023-04-11 07:41:51		Date of Measurement:	2023-04-11 07:41:24		Date of Measurement:	2023-04-11 07:40:57		Date of Measurement:	2023-04-11 07:40:31		Date of Measurement:	2023-04-11 07:40:04		Date of Measurement:	2023-04-11 07:39:38		Date of Measurement:	2023-04-11 07:39:11		Date of Measurement:	2023-04-11 07:38:44		Date of Measurement:	2023-04-11 07:38:17		Date of Measurement:	2023-04-11 07:37:51
Capillary Type:	Monolith Premium Capillary		Capillary Type:	Monolith Premium Capillary		Capillary Type:	Monolith Premium Capillary		Capillary Type:	Monolith Premium Capillary		Capillary Type:	Monolith Premium Capillary		Capillary Type:	Monolith Premium Capillary		Capillary Type:	Monolith Premium Capillary		Capillary Type:	Monolith Premium Capillary		Capillary Type:	Monolith Premium Capillary		Capillary Type:	Monolith Premium Capillary		Capillary Type:	Monolith Premium Capillary		Capillary Type:	Monolith Premium Capillary		Capillary Type:	Monolith Premium Capillary		Capillary Type:	Monolith Premium Capillary		Capillary Type:	Monolith Premium Capillary		Capillary Type:	Monolith Premium Capillary
Capillary Position:	16		Capillary Position:	8		Capillary Position:	15		Capillary Position:	7		Capillary Position:	14		Capillary Position:	6		Capillary Position:	13		Capillary Position:	5		Capillary Position:	12		Capillary Position:	4		Capillary Position:	11		Capillary Position:	3		Capillary Position:	10		Capillary Position:	2		Capillary Position:	9		Capillary Position:	1
Ligand:	PTX		Ligand:	PTX		Ligand:	PTX		Ligand:	PTX		Ligand:	PTX		Ligand:	PTX		Ligand:	PTX		Ligand:	PTX		Ligand:	PTX		Ligand:	PTX		Ligand:	PTX		Ligand:	PTX		Ligand:	PTX		Ligand:	PTX		Ligand:	PTX		Ligand:	PTX
Ligand Concentration:	3.05176e-08		Ligand Concentration:	7.8125e-06		Ligand Concentration:	6.10352e-08		Ligand Concentration:	1.5625e-05		Ligand Concentration:	1.2207e-07		Ligand Concentration:	3.125e-05		Ligand Concentration:	2.44141e-07		Ligand Concentration:	6.25e-05		Ligand Concentration:	4.88281e-07		Ligand Concentration:	0.000125		Ligand Concentration:	9.76563e-07		Ligand Concentration:	0.00025		Ligand Concentration:	1.95313e-06		Ligand Concentration:	0.0005		Ligand Concentration:	3.90625e-06		Ligand Concentration:	0.001
Target:	OsABG		Target:	OsABG		Target:	OsABG		Target:	OsABG		Target:	OsABG		Target:	OsABG		Target:	OsABG		Target:	OsABG		Target:	OsABG		Target:	OsABG		Target:	OsABG		Target:	OsABG		Target:	OsABG		Target:	OsABG		Target:	OsABG		Target:	OsABG
TargetConcentration:	5e-09		TargetConcentration:	5e-09		TargetConcentration:	5e-09		TargetConcentration:	5e-09		TargetConcentration:	5e-09		TargetConcentration:	5e-09		TargetConcentration:	5e-09		TargetConcentration:	5e-09		TargetConcentration:	5e-09		TargetConcentration:	5e-09		TargetConcentration:	5e-09		TargetConcentration:	5e-09		TargetConcentration:	5e-09		TargetConcentration:	5e-09		TargetConcentration:	5e-09		TargetConcentration:	5e-09
Measurement Settings	Measurement Settings		Measurement Settings	Measurement Settings		Measurement Settings	Measurement Settings		Measurement Settings	Measurement Settings		Measurement Settings	Measurement Settings		Measurement Settings	Measurement Settings		Measurement Settings	Measurement Settings		Measurement Settings	Measurement Settings		Measurement Settings	Measurement Settings		Measurement Settings	Measurement Settings		Measurement Settings	Measurement Settings		Measurement Settings	Measurement Settings		Measurement Settings	Measurement Settings		Measurement Settings	Measurement Settings		Measurement Settings	Measurement Settings		Measurement Settings	Measurement Settings
MST-Power:	Medium		MST-Power:	Medium		MST-Power:	Medium		MST-Power:	Medium		MST-Power:	Medium		MST-Power:	Medium		MST-Power:	Medium		MST-Power:	Medium		MST-Power:	Medium		MST-Power:	Medium		MST-Power:	Medium		MST-Power:	Medium		MST-Power:	Medium		MST-Power:	Medium		MST-Power:	Medium		MST-Power:	Medium
Excitation-Power:	15		Excitation-Power:	15		Excitation-Power:	15		Excitation-Power:	15		Excitation-Power:	15		Excitation-Power:	15		Excitation-Power:	15		Excitation-Power:	15		Excitation-Power:	15		Excitation-Power:	15		Excitation-Power:	15		Excitation-Power:	15		Excitation-Power:	15		Excitation-Power:	15		Excitation-Power:	15		Excitation-Power:	15
Excitation type:	Pico - RED		Excitation type:	Pico - RED		Excitation type:	Pico - RED		Excitation type:	Pico - RED		Excitation type:	Pico - RED		Excitation type:	Pico - RED		Excitation type:	Pico - RED		Excitation type:	Pico - RED		Excitation type:	Pico - RED		Excitation type:	Pico - RED		Excitation type:	Pico - RED		Excitation type:	Pico - RED		Excitation type:	Pico - RED		Excitation type:	Pico - RED		Excitation type:	Pico - RED		Excitation type:	Pico - RED
Thermostat Setpoint:	25		Thermostat Setpoint:	25		Thermostat Setpoint:	25		Thermostat Setpoint:	25		Thermostat Setpoint:	25		Thermostat Setpoint:	25		Thermostat Setpoint:	25		Thermostat Setpoint:	25		Thermostat Setpoint:	25		Thermostat Setpoint:	25		Thermostat Setpoint:	25		Thermostat Setpoint:	25		Thermostat Setpoint:	25		Thermostat Setpoint:	25		Thermostat Setpoint:	25		Thermostat Setpoint:	25
Included	Included		Included	Included		Included	Included		Included	Included		Included	Included		Included	Included		Included	Included		Included	Included		Included	Included		Included	Included		Included	Included		Included	Included		Included	Included		Included	Included		Included	Included		Included	Included
Time [s]	Normalized Fluorescence [-]		Time [s]	Normalized Fluorescence [-]		Time [s]	Normalized Fluorescence [-]		Time [s]	Normalized Fluorescence [-]		Time [s]	Normalized Fluorescence [-]		Time [s]	Normalized Fluorescence [-]		Time [s]	Normalized Fluorescence [-]		Time [s]	Normalized Fluorescence [-]		Time [s]	Normalized Fluorescence [-]		Time [s]	Normalized Fluorescence [-]		Time [s]	Normalized Fluorescence [-]		Time [s]	Normalized Fluorescence [-]		Time [s]	Normalized Fluorescence [-]		Time [s]	Normalized Fluorescence [-]		Time [s]	Normalized Fluorescence [-]		Time [s]	Normalized Fluorescence [-]
-2.9501	0.998767		-2.9501	1.00184		-2.9501	1.00128		-2.9502	0.998535		-2.9502	1.00012		-2.9502	1.00019		-2.9502	0.998129		-2.9501	1.00077		-2.9501	0.99975		-2.9502	1.00087		-2.9502	1.00043		-2.9501	0.997382		-2.9501	1.00047		-2.9502	0.999377		-2.9502	1.00065		-2.9502	0.997996
-2.9001	0.999553		-2.9001	0.997703		-2.9001	0.999274		-2.9002	1.00092		-2.9002	0.999427		-2.9002	0.996714		-2.9002	0.999166		-2.9001	1.00159		-2.9001	0.998126		-2.9002	0.997531		-2.9002	0.998703		-2.9001	0.997404		-2.9001	1.00113		-2.9002	0.999318		-2.9002	1.00048		-2.9002	0.999549
-2.8501	1.00023		-2.8501	1.00098		-2.8501	0.999341		-2.8502	1.00081		-2.8502	0.998664		-2.8502	0.999161		-2.8502	1.0019		-2.8501	1.00016		-2.8501	0.999931		-2.8502	1.00255		-2.8502	0.997802		-2.8501	1.00218		-2.8501	1.00204		-2.8502	0.998912		-2.8502	0.999692		-2.8501	0.998341
-2.8001	0.997421		-2.8001	0.998779		-2.8001	0.998786		-2.8002	0.998947		-2.8002	0.999754		-2.8002	1.0011		-2.8002	0.999893		-2.8001	1.00136		-2.8001	1.00087		-2.8002	1.00045		-2.8002	1.00129		-2.8001	1.00152		-2.8001	1.00046		-2.8002	1.00038		-2.8002	0.998017		-2.8001	1.00128
-2.7501	1.00082		-2.7501	0.999471		-2.7501	0.99864		-2.7502	0.998099		-2.7502	1.00031		-2.7502	1.00191		-2.7502	0.999294		-2.7501	1.00006		-2.7501	1.00014		-2.7502	0.999614		-2.7502	1.00017		-2.7501	0.994519		-2.7501	0.999879		-2.7502	1.00176		-2.7502	0.998764		-2.7501	1.00313
-2.7001	0.996449		-2.7001	0.999786		-2.7001	0.999456		-2.7002	1.00193		-2.7002	0.998226		-2.7002	1.00082		-2.7001	1.00042		-2.7001	0.998382		-2.7001	1.00032		-2.7002	1.00034		-2.7002	1.00085		-2.7001	0.999521		-2.7001	0.998912		-2.7002	1.00037		-2.7002	1.00017		-2.7001	1.00258
-2.6501	0.998988		-2.6501	0.999918		-2.6501	1.0017		-2.6502	1.00021		-2.6502	0.998971		-2.6501	1.0004		-2.6501	1.00107		-2.6501	0.999122		-2.6501	1.00005		-2.6502	0.998527		-2.6502	0.998165		-2.6501	0.99872		-2.6501	1.00093		-2.6502	1.00081		-2.6502	1.00245		-2.6501	0.99973
-2.6001	1.00005		-2.6001	0.998428		-2.6001	1.00031		-2.6002	0.997742		-2.6002	1.00166		-2.6001	0.999089		-2.6001	0.998064		-2.6001	1.00031		-2.6001	0.998985		-2.6002	0.997772		-2.6002	0.999365		-2.6001	1.00032		-2.6001	0.998726		-2.6002	0.998793		-2.6002	1.00099		-2.6001	1.00017
-2.5501	0.99984		-2.5501	0.998927		-2.5501	0.998779		-2.5502	0.998695		-2.5502	0.999041		-2.5501	0.998521		-2.5501	0.998205		-2.5501	0.997945		-2.5501	1.00004		-2.5502	0.99997		-2.5502	1.00079		-2.5501	1.00243		-2.5501	0.999161		-2.5502	1.00011		-2.5502	0.999077		-2.5501	0.999608
-2.5001	1.00161		-2.5001	0.997849		-2.5001	0.99915		-2.5002	1.00123		-2.5002	0.998578		-2.5001	0.998917		-2.5001	1.00196		-2.5001	0.99767		-2.5001	0.999687		-2.5002	1.00118		-2.5002	1.00221		-2.5001	1.00105		-2.5001	1.00004		-2.5002	0.997937		-2.5002	1.00088		-2.5001	0.999302
-2.4501	1.00201		-2.4501	1.0011		-2.4501	0.996828		-2.4502	0.999543		-2.4502	1.00084		-2.4501	1.00215		-2.4501	0.997291		-2.4501	1.00153		-2.4501	0.999856		-2.4502	0.999622		-2.4502	0.999199		-2.4501	1.00057		-2.4501	0.999628		-2.4502	1.0021		-2.4502	1.00071		-2.4501	0.998969
-2.4001	1.00258		-2.4001	1.002		-2.4001	1.00043		-2.4002	0.996892		-2.4002	0.997688		-2.4001	0.999276		-2.4001	0.999171		-2.4001	0.999576		-2.4001	1.004		-2.4002	0.998589		-2.4001	1.00012		-2.4001	1.00238		-2.4001	1.00033		-2.4002	0.998315		-2.4002	0.996892		-2.4001	1.00102
-2.3501	0.999904		-2.3501	1.0015		-2.3501	0.999243		-2.3502	1.00261		-2.3502	0.998979		-2.3501	1.00211		-2.3501	0.999977		-2.3501	0.998096		-2.3501	1.00217		-2.3501	1.00013		-2.3501	0.999849		-2.3501	1.00073		-2.3501	0.99963		-2.3502	0.99837		-2.3502	0.998126		-2.3501	0.997526
-2.3001	1.00074		-2.3001	0.998729		-2.3001	1.00179		-2.3002	1.00062		-2.3002	0.998339		-2.3001	0.999552		-2.3001	0.999865		-2.3001	0.999814		-2.3001	0.997063		-2.3001	1.00207		-2.3001	0.998392		-2.3001	0.99766		-2.3001	0.998561		-2.3002	1.00011		-2.3002	0.999055		-2.3001	0.99924
-2.2501	1.00046		-2.2501	0.998477		-2.2501	1.0012		-2.2502	1.00001		-2.2502	0.997947		-2.2501	1.00159		-2.2501	0.999634		-2.2501	1.00247		-2.2501	0.998159		-2.2501	0.994384		-2.2501	0.99906		-2.2501	1.00072		-2.2501	0.998659		-2.2502	1.0007		-2.2502	1.00132		-2.2501	1.00139
-2.2001	1.00011		-2.2001	0.999176		-2.2001	1.00183		-2.2002	1.00059		-2.2002	1.00006		-2.2001	1.0002		-2.2001	0.998423		-2.2001	1.00399		-2.2001	1.00214		-2.2001	0.999962		-2.2001	0.997886		-2.2001	1.00146		-2.2001	1.00093		-2.2002	0.996794		-2.2001	0.999158		-2.2001	0.997563
-2.1501	1.00253		-2.1501	0.995686		-2.1501	1.00099		-2.1502	0.998554		-2.1502	1.00175		-2.1501	1.00139		-2.1501	1.00248		-2.1501	1.00146		-2.1501	1.00002		-2.1501	1.00029		-2.1501	1.00042		-2.1501	1		-2.1501	1.00215		-2.1502	0.999529		-2.1501	1.00188		-2.1501	1.00074
-2.1001	0.999122		-2.1001	1.00348		-2.1001	0.998051		-2.1002	1.00242		-2.1002	1.00031		-2.1001	0.997302		-2.1001	1.00206		-2.1001	0.998092		-2.1001	0.998951		-2.1001	1.00104		-2.1001	0.998717		-2.1001	1.00044		-2.1001	0.999523		-2.1001	0.99965		-2.1001	0.999301		-2.1001	1.00095
-2.0501	0.997094		-2.0501	1.00008		-2.0501	1.00005		-2.0502	1.00097		-2.0502	0.997823		-2.0501	1.00237		-2.0501	0.999017		-2.0501	0.999901		-2.0501	0.998491		-2.0501	0.997114		-2.0501	1.00073		-2.0501	0.998468		-2.0501	0.998907		-2.0501	1.00167		-2.0501	0.999845		-2.0501	1.00172
-2.0001	0.999481		-2.0001	1.00048		-2.0001	1.00095		-2.0002	0.997719		-2.0002	1.00044		-2.0001	0.997863		-2.0001	1.00193		-2.0001	0.998919		-2.0001	0.998996		-2.0001	1.00046		-2.0001	0.996585		-2.0001	1.00055		-2.0001	1.00049		-2.0001	1.00009		-2.0001	1.00143		-2.0001	0.998393
-1.9501	0.999089		-1.9501	1.00012		-1.9501	0.998983		-1.9502	1.0002		-1.9501	1.00047		-1.9501	0.997154		-1.9501	1.00109		-1.9501	1.00067		-1.9501	1.00077		-1.9501	0.999801		-1.9501	0.998308		-1.9501	1.00072		-1.9501	0.998124		-1.9501	0.99966		-1.9501	0.999043		-1.9501	1.00066
-1.9001	1.00095		-1.9001	1.0002		-1.9001	1.00092		-1.9001	0.998583		-1.9001	1.00348		-1.9001	0.998267		-1.9001	1.00205		-1.9001	1.00056		-1.9001	0.999876		-1.9001	1.00164		-1.9001	1.00191		-1.9001	1.00002		-1.9001	0.996752		-1.9001	0.999653		-1.9001	1.00126		-1.9001	0.999563
-1.8501	0.999551		-1.8501	1.00154		-1.8501	1.00028		-1.8501	1.00031		-1.8501	0.999935		-1.8501	1.00059		-1.8501	0.99784		-1.8501	0.999965		-1.8501	0.99987		-1.8501	0.999975		-1.8501	1.00087		-1.8501	1.00075		-1.8501	0.997227		-1.8501	1.00005		-1.8501	0.997508		-1.8501	1.00131
-1.8001	1.00068		-1.8001	1.00139		-1.8001	1.00381		-1.8001	0.998299		-1.8001	1.00053		-1.8001	0.997829		-1.8001	0.999939		-1.8001	0.998546		-1.8001	1.00186		-1.8001	1.00042		-1.8001	0.99946		-1.8001	0.999217		-1.8001	1.00034		-1.8001	1.00023		-1.8001	0.998034		-1.8001	0.997995
-1.7501	0.99753		-1.7501	1.00135		-1.7501	0.999561		-1.7501	0.999721		-1.7501	0.999273		-1.7501	0.997513		-1.7501	1.00071		-1.7501	1.00186		-1.7501	0.996859		-1.7501	1.00058		-1.7501	1.00091		-1.7501	1.00051		-1.7501	0.997542		-1.7501	0.999484		-1.7501	1.00139		-1.7501	1.00122
-1.7001	0.999613		-1.7001	1.00243		-1.7001	1.00007		-1.7001	0.999354		-1.7001	1.00118		-1.7001	1.00082		-1.7001	0.997952		-1.7001	0.998109		-1.7001	1.00207		-1.7001	1.00023		-1.7001	1.00018		-1.7001	1.00032		-1.7001	0.999396		-1.7001	1.00069		-1.7001	0.995386		-1.7001	0.999091
-1.6501	0.996827		-1.6501	1.00042		-1.6501	0.998945		-1.6501	0.996921		-1.6501	0.997793		-1.6501	0.999808		-1.6501	0.999903		-1.6501	0.999445		-1.65	1.00184		-1.6501	0.998661		-1.6501	1.00048		-1.6501	0.99931		-1.6501	1.00006		-1.6501	0.998498		-1.6501	0.997683		-1.6501	0.997648
-1.6001	1.00091		-1.6001	0.999988		-1.6001	0.99886		-1.6001	0.996746		-1.6001	0.999261		-1.6001	0.999183		-1.6001	0.997984		-1.6001	0.999296		-1.6	0.998808		-1.6001	0.997366		-1.6001	0.999764		-1.6001	0.998007		-1.6001	0.998442		-1.6001	0.999903		-1.6001	0.998871		-1.6001	1.00127
-1.5501	0.999718		-1.5501	0.999123		-1.5501	0.999313		-1.5501	0.998128		-1.5501	0.99834		-1.5501	0.996218		-1.5501	1.00064		-1.55	0.999684		-1.55	0.999395		-1.5501	1.00179		-1.5501	0.998366		-1.5501	1.00046		-1.5501	0.995553		-1.5501	0.999014		-1.5501	0.999481		-1.5501	0.99974
-1.5001	0.998358		-1.5001	1.00026		-1.5001	1.0003		-1.5001	1.0008		-1.5001	0.998309		-1.5001	0.998667		-1.5001	1.00061		-1.5	0.999057		-1.5	0.998833		-1.5001	0.99805		-1.5001	0.999741		-1.5001	0.999099		-1.5001	0.998257		-1.5001	0.999404		-1.5001	0.999653		-1.5001	0.999226
-1.4501	0.998977		-1.4501	0.998997		-1.4501	1.0017		-1.4501	0.995286		-1.4501	1.00087		-1.4501	1.00076		-1.4501	0.998422		-1.45	1.00008		-1.45	0.99874		-1.4501	0.998202		-1.4501	1.00103		-1.4501	0.997492		-1.4501	0.995516		-1.4501	1.00145		-1.4501	0.999481		-1.4501	1.00049
-1.4001	1.00118		-1.4001	0.998797		-1.4001	0.999951		-1.4001	0.998311		-1.4001	0.997829		-1.4001	0.998091		-1.4001	0.998702		-1.4	0.999282		-1.4	0.998794		-1.4001	0.998086		-1.4001	0.99882		-1.4001	0.998884		-1.4001	0.998481		-1.4001	1.00185		-1.4001	0.999001		-1.4001	0.997502
-1.3501	0.998048		-1.3501	0.9955		-1.3501	0.998996		-1.3501	0.999198		-1.3501	0.998919		-1.3501	1.00152		-1.3501	1.0009		-1.35	0.999797		-1.35	0.999253		-1.3501	0.999274		-1.3501	1.00177		-1.3501	1.00016		-1.35	1.0019		-1.3501	1.00003		-1.3501	0.998034		-1.3501	0.998732
-1.3001	1.0011		-1.3001	1.00073		-1.3	0.998604		-1.3001	0.998851		-1.3001	0.998971		-1.3001	0.997428		-1.3001	0.998716		-1.3	0.997546		-1.3	1.00011		-1.3001	0.99767		-1.3001	0.999609		-1.3	1.00071		-1.3	0.998974		-1.3001	1.00005		-1.3001	0.999129		-1.3001	0.998598
-1.25	0.998354		-1.2501	1.00067		-1.25	0.99822		-1.2501	0.996974		-1.2501	1.00009		-1.2501	1.00031		-1.2501	0.998516		-1.25	0.99827		-1.25	0.997382		-1.2501	0.999027		-1.2501	0.997574		-1.25	0.998986		-1.25	0.999686		-1.2501	0.999389		-1.2501	0.999147		-1.2501	0.997329
-1.2	0.997812		-1.2	0.996741		-1.2	0.9993		-1.2001	0.999339		-1.2001	0.998798		-1.2001	0.998899		-1.2001	0.9983		-1.2	0.999207		-1.2	0.998181		-1.2001	0.997811		-1.2001	0.999529		-1.2	1.00002		-1.2	0.998507		-1.2001	0.997495		-1.2001	0.996139		-1.2001	0.998628
-1.15	0.997243		-1.15	1.00221		-1.15	0.998284		-1.1501	1.00104		-1.1501	1.00035		-1.1501	0.998744		-1.1501	1.00238		-1.15	1.00054		-1.15	1.00034		-1.1501	0.998806		-1.1501	0.998695		-1.15	0.999246		-1.15	0.9979		-1.1501	0.999494		-1.1501	0.997589		-1.1501	0.997132
-1.1	0.998793		-1.1	0.99949		-1.1	1.00071		-1.1001	1.00151		-1.1001	1.00431		-1.1001	1.00116		-1.1001	0.999307		-1.1	0.997534		-1.1	1.00004		-1.1001	0.996312		-1.1001	1.00016		-1.1	0.999783		-1.1	0.999662		-1.1001	0.999346		-1.1001	1.00119		-1.1001	1.00061
-1.05	0.996143		-1.05	1.00091		-1.05	0.99769		-1.0501	0.998044		-1.0501	0.998755		-1.0501	0.997529		-1.0501	1.00267		-1.05	0.99752		-1.05	0.99896		-1.0501	0.997641		-1.0501	1.00006		-1.05	0.997881		-1.05	0.999796		-1.0501	0.997727		-1.0501	0.996834		-1.0501	0.997159
-1	0.998686		-1	0.999955		-1	1.0016		-1.0001	0.995701		-1.0001	0.999907		-1.0001	0.997027		-1.0001	1.00028		-1	0.99978		-1	1.00047		-1.0001	1.00045		-1.0001	1.00024		-1	1.00091		-1	0.997688		-1.0001	1.00148		-1.0001	0.995704		-1	1.0002
-0.95	0.997925		-0.95	0.999644		-0.95	0.997286		-0.9501	0.999891		-0.9501	0.998822		-0.9501	0.996354		-0.9501	0.998346		-0.95	1.00087		-0.95	0.999667		-0.9501	0.999627		-0.9501	0.997402		-0.95	0.998036		-0.95	0.997809		-0.9501	1.00128		-0.9501	0.997317		-0.95	1.00152
-0.9	1.00008		-0.9	0.996913		-0.9	0.999467		-0.9001	0.997154		-0.9001	1.00149		-0.9001	0.99696		-0.9001	1.00014		-0.9	0.998323		-0.9	0.997584		-0.9001	0.998595		-0.9001	1.00099		-0.9	1.00133		-0.9	0.996999		-0.9001	0.999627		-0.9001	0.998021		-0.9	1.00061
-0.85	0.999353		-0.85	0.998996		-0.85	0.99987		-0.8501	0.997873		-0.8501	1.00058		-0.85	0.997389		-0.85	1.00106		-0.85	1.00103		-0.85	0.999322		-0.8501	1.00055		-0.8501	0.997568		-0.85	1.00108		-0.85	0.998805		-0.8501	0.997794		-0.8501	0.996637		-0.85	0.998024
-0.8	1.00199		-0.8	1.00081		-0.8	0.999618		-0.8001	0.996407		-0.8001	1.00178		-0.8	1.00023		-0.8	0.999364		-0.8	1.00051		-0.8	0.998547		-0.8001	0.998357		-0.8001	1.00004		-0.8	1.00032		-0.8	0.998443		-0.8001	0.997628		-0.8001	0.998802		-0.8	0.997182
-0.75	0.997779		-0.75	0.998965		-0.75	0.999513		-0.7501	0.998015		-0.7501	1.00052		-0.75	0.998508		-0.75	0.998534		-0.75	1.00033		-0.75	0.998384		-0.7501	0.995669		-0.7501	1.00046		-0.75	0.99768		-0.75	0.999091		-0.7501	1.00106		-0.7501	0.996528		-0.75	0.99949
-0.7	0.994191		-0.7	1.00022		-0.7	0.998507		-0.7001	0.996537		-0.7001	1.0011		-0.7	0.996254		-0.7	0.997552		-0.7	0.996916		-0.7	0.99831		-0.7001	0.998345		-0.7001	1.00071		-0.7	0.998863		-0.7	0.998872		-0.7001	0.996936		-0.7001	0.997522		-0.7	1.00004
-0.65	1.00029		-0.65	0.999042		-0.65	0.997239		-0.6501	1.00031		-0.6501	1.00061		-0.65	0.999968		-0.65	0.998514		-0.65	1.0008		-0.65	1.00014		-0.6501	0.996097		-0.6501	0.999229		-0.65	0.9991		-0.65	0.996309		-0.6501	0.99898		-0.6501	0.99956		-0.65	0.998527
-0.6	0.998997		-0.6	0.998821		-0.6	0.997845		-0.6001	0.997682		-0.6001	0.99825		-0.6	0.997694		-0.6	1.00127		-0.6	1.00039		-0.6	1.00015		-0.6001	0.998585		-0.6	0.999935		-0.6	0.999343		-0.6	0.99846		-0.6001	0.999989		-0.6001	0.999482		-0.6	0.997345
-0.55	0.998664		-0.55	0.999772		-0.55	0.994711		-0.5501	0.997579		-0.5501	0.995773		-0.55	0.997199		-0.55	0.999673		-0.55	1.00064		-0.55	1.00093		-0.55	0.997242		-0.55	0.999703		-0.55	1.00045		-0.55	0.997137		-0.5501	1.00029		-0.5501	1.00018		-0.55	1.00013
-0.5	0.996178		-0.5	1.00124		-0.5	1.00042		-0.5001	0.997668		-0.5001	0.997178		-0.5	1.00041		-0.5	0.997821		-0.5	0.996889		-0.5	0.998249		-0.5	1.00115		-0.5	0.997459		-0.5	0.997925		-0.5	0.999797		-0.5001	1.00053		-0.5001	0.999374		-0.5	0.998385
-0.45	0.998175		-0.45	0.99953		-0.45	0.99918		-0.4501	0.997281		-0.4501	1.00014		-0.45	0.999523		-0.45	0.998955		-0.45	0.998843		-0.45	0.998314		-0.45	1.00007		-0.45	1.0009		-0.45	0.997799		-0.45	0.996982		-0.4501	0.995241		-0.4501	0.999736		-0.45	1.00012
-0.4	0.99672		-0.4	1.0019		-0.4	0.99995		-0.4001	0.996817		-0.4001	0.996492		-0.4	0.999716		-0.4	0.997918		-0.4	1.00004		-0.4	0.998246		-0.4	0.997763		-0.4	1.00003		-0.4	0.999086		-0.4	1.00166		-0.4001	0.9986		-0.4001	0.998331		-0.4	0.998723
-0.35	0.997842		-0.35	1.00202		-0.35	1.00255		-0.3501	0.999103		-0.3501	0.998966		-0.35	0.996324		-0.35	0.998354		-0.35	0.997088		-0.35	1.00134		-0.35	0.997685		-0.35	0.999665		-0.35	0.997795		-0.35	0.996977		-0.3501	0.999819		-0.35	0.994769		-0.35	0.999722
-0.3	0.998327		-0.3	0.998973		-0.3	1.00117		-0.3001	0.998085		-0.3001	0.997363		-0.3	0.998059		-0.3	1.00051		-0.3	1.00065		-0.3	0.998853		-0.3	0.997625		-0.3	1.00071		-0.3	1.00093		-0.3	0.99823		-0.3001	1.00064		-0.3	0.99774		-0.3	1.00069
-0.25	0.999463		-0.25	1.00036		-0.25	0.998364		-0.2501	1.00191		-0.2501	0.997797		-0.25	0.998237		-0.25	0.998745		-0.25	1.00047		-0.25	0.999656		-0.25	0.999397		-0.25	0.997843		-0.25	0.998114		-0.25	0.999362		-0.25	0.99979		-0.25	0.998526		-0.25	1.00001
-0.2	0.999398		-0.2	1.00208		-0.2	1.00139		-0.2001	0.999415		-0.2001	0.996763		-0.2	1.00107		-0.2	0.99948		-0.2	1.00134		-0.2	1.0003		-0.2	0.999001		-0.2	0.998289		-0.2	0.998455		-0.2	0.999874		-0.2	0.996962		-0.2	0.999328		-0.2	0.998924
-0.15	0.999004		-0.15	0.996046		-0.15	1.0003		-0.1501	0.998366		-0.15	0.998683		-0.15	0.999533		-0.15	1.00131		-0.15	0.998351		-0.15	0.998396		-0.15	1.00195		-0.15	0.998134		-0.15	1.0002		-0.15	0.997011		-0.15	1.00028		-0.15	0.999046		-0.15	0.99961
-0.0999999	1.00018		-0.0999999	0.997669		-0.0999999	0.999979		-0.1001	0.998238		-0.0999999	0.99751		-0.0999999	0.998869		-0.0999999	0.999488		-0.0999999	0.999479		-0.0999999	0.999913		-0.0999999	0.996897		-0.0999999	0.997794		-0.0999999	0.999758		-0.0999999	0.999566		-0.0999999	0.999178		-0.0999999	0.998517		-0.0999999	0.998604
-0.05	1.00032		-0.05	0.998198		-0.05	0.99804		-0.05	0.996285		-0.05	0.998588		-0.05	1		-0.05	0.998671		-0.05	1.00147		-0.05	0.99871		-0.05	0.995733		-0.05	0.996407		-0.05	0.999149		-0.05	0.996904		-0.05	0.998455		-0.05	0.997755		-0.05	1.00063
0	0.998643		0	0.99823		0	0.999802		0	0.997775		0	0.998238		0	0.997646		0	0.998857		0	1.00082		0	1.0014		0	0.999867		0	0.998187		0	0.999235		0	0.998896		0	0.999406		0	0.999852		0	0.999065
0.05	0.992647		0.05	0.991025		0.05	0.990048		0.05	0.988184		0.05	0.989481		0.05	0.988572		0.05	0.989816		0.0500002	0.990774		0.0500002	0.992448		0.05	0.987825		0.05	0.988436		0.05	0.991464		0.05	0.991952		0.05	0.989328		0.05	0.991923		0.05	0.98949
0.0999999	0.977564		0.0999999	0.97772		0.0999999	0.974346		0.0999999	0.976755		0.0999999	0.977356		0.0999999	0.976821		0.0999999	0.977241		0.1	0.976822		0.1	0.973559		0.0999999	0.978164		0.0999999	0.975926		0.0999999	0.975406		0.0999999	0.976447		0.0999999	0.977288		0.0999999	0.978385		0.0999999	0.979933
0.15	0.967417		0.15	0.970146		0.15	0.971498		0.15	0.969306		0.15	0.970331		0.15	0.967508		0.15	0.970243		0.15	0.969482		0.1501	0.966703		0.15	0.967072		0.15	0.968544		0.15	0.970056		0.15	0.971126		0.15	0.970715		0.15	0.970889		0.15	0.971556
0.2	0.965483		0.2	0.965446		0.2	0.963601		0.2	0.963341		0.2	0.962654		0.2	0.964935		0.2	0.96608		0.2	0.965841		0.2001	0.965102		0.2	0.964252		0.2	0.962453		0.2	0.966296		0.2	0.966541		0.2	0.964997		0.2	0.961953		0.2	0.963895
0.25	0.961972		0.25	0.962589		0.25	0.959251		0.25	0.960741		0.25	0.963186		0.25	0.962986		0.25	0.960791		0.2501	0.96284		0.2501	0.961754		0.25	0.96294		0.25	0.962187		0.25	0.961324		0.25	0.958763		0.25	0.963563		0.25	0.962388		0.25	0.964913
0.3	0.957841		0.3	0.957488		0.3	0.958057		0.3	0.954186		0.3	0.958034		0.3	0.959512		0.3	0.962699		0.3001	0.957846		0.3001	0.960006		0.3	0.956878		0.3	0.957806		0.3	0.959593		0.3	0.958035		0.3	0.959996		0.3	0.959023		0.3	0.959015
0.35	0.956147		0.35	0.953148		0.35	0.953885		0.35	0.955637		0.35	0.956622		0.35	0.958747		0.35	0.956906		0.3501	0.957496		0.3501	0.954993		0.35	0.957631		0.35	0.957037		0.35	0.95817		0.35	0.955806		0.35	0.957691		0.35	0.952948		0.35	0.95633
0.4	0.954897		0.4	0.95002		0.4	0.953013		0.4	0.952461		0.4	0.951308		0.4	0.952894		0.4	0.953903		0.4001	0.955445		0.4001	0.954463		0.4	0.952888		0.4	0.954099		0.4	0.955411		0.4	0.954774		0.4	0.955434		0.4	0.951488		0.4	0.955828
0.45	0.955402		0.45	0.955263		0.45	0.95104		0.45	0.95076		0.45	0.95212		0.45	0.952183		0.45	0.951838		0.4501	0.953525		0.4501	0.953819		0.45	0.954666		0.45	0.950082		0.45	0.956453		0.4501	0.949394		0.45	0.95288		0.45	0.953634		0.45	0.952859
0.5	0.950422		0.5	0.947167		0.5001	0.949396		0.5	0.951297		0.5	0.949098		0.5	0.946899		0.5	0.950719		0.5001	0.95354		0.5001	0.951286		0.5	0.950976		0.5	0.947969		0.5001	0.957574		0.5001	0.950468		0.5	0.953804		0.5	0.948787		0.5	0.95099
0.5501	0.949601		0.55	0.945247		0.5501	0.948204		0.55	0.945651		0.55	0.950352		0.55	0.947449		0.55	0.948656		0.5501	0.948998		0.5501	0.945371		0.55	0.950425		0.55	0.947157		0.5501	0.954273		0.5501	0.948572		0.55	0.950234		0.55	0.950024		0.55	0.947892
0.6001	0.947042		0.6	0.944087		0.6001	0.950699		0.6	0.945051		0.6	0.947747		0.6	0.946833		0.6	0.943649		0.6001	0.948618		0.6001	0.945121		0.6	0.947884		0.6	0.943185		0.6001	0.95166		0.6001	0.943809		0.6	0.94993		0.6	0.948093		0.6	0.948103
0.6501	0.947135		0.6501	0.946699		0.6501	0.943648		0.65	0.943122		0.65	0.943387		0.65	0.948626		0.65	0.950055		0.6501	0.949287		0.6501	0.947376		0.65	0.948569		0.65	0.945679		0.6501	0.950482		0.6501	0.946774		0.65	0.947846		0.65	0.945177		0.65	0.94934
0.7001	0.943315		0.7001	0.942968		0.7001	0.943018		0.7	0.943148		0.7	0.944832		0.7	0.94297		0.7	0.942036		0.7001	0.945297		0.7001	0.9433		0.7	0.947685		0.7	0.945372		0.7001	0.953017		0.7001	0.944081		0.7	0.943763		0.7	0.946636		0.7	0.947228
0.7501	0.942807		0.7501	0.941954		0.7501	0.941065		0.75	0.941987		0.75	0.941447		0.75	0.945379		0.75	0.944097		0.7501	0.948678		0.7501	0.944907		0.75	0.943626		0.75	0.940071		0.7501	0.950234		0.7501	0.942785		0.75	0.945819		0.75	0.943212		0.75	0.944684
0.8001	0.944117		0.8001	0.94007		0.8001	0.941084		0.8	0.939604		0.8	0.941		0.8	0.941835		0.8	0.94282		0.8001	0.940206		0.8001	0.940388		0.8	0.942692		0.8	0.938703		0.8001	0.948212		0.8001	0.940656		0.8	0.9456		0.8	0.938923		0.8001	0.943926
0.8501	0.942373		0.8501	0.94053		0.8501	0.941411		0.85	0.940892		0.85	0.940006		0.85	0.940609		0.85	0.943166		0.8501	0.941187		0.8501	0.943545		0.85	0.941687		0.85	0.939382		0.8501	0.948396		0.8501	0.936838		0.85	0.943799		0.85	0.940721		0.8501	0.941803
0.9001	0.940561		0.9001	0.938729		0.9001	0.93969		0.9	0.937919		0.9	0.938261		0.9	0.940281		0.9	0.940612		0.9001	0.941826		0.9001	0.937935		0.9	0.943379		0.9	0.939575		0.9001	0.946934		0.9001	0.939369		0.9	0.944458		0.9	0.939951		0.9001	0.944898
0.9501	0.937447		0.9501	0.939783		0.9501	0.937926		0.95	0.934993		0.95	0.940077		0.95	0.938149		0.9501	0.939195		0.9501	0.940807		0.9501	0.93729		0.95	0.9452		0.95	0.937497		0.9501	0.949093		0.9501	0.937476		0.95	0.941606		0.95	0.94198		0.9501	0.940718
1.0001	0.939755		1.0001	0.93999		1.0001	0.937262		1	0.938601		1	0.936433		1.0001	0.939331		1.0001	0.937452		1.0001	0.93773		1.0001	0.937125		1	0.94306		1	0.935924		1.0001	0.945826		1.0001	0.935277		1	0.939927		1	0.939606		1.0001	0.943513
1.0501	0.936225		1.0501	0.939114		1.0501	0.938568		1.05	0.933972		1.05	0.93492		1.0501	0.938744		1.0501	0.936215		1.0501	0.938738		1.0501	0.937719		1.05	0.937925		1.05	0.933052		1.0501	0.943461		1.0501	0.934634		1.05	0.937038		1.05	0.933952		1.0501	0.941685
1.1001	0.93667		1.1001	0.935873		1.1001	0.93522		1.1	0.936676		1.1	0.934199		1.1001	0.939249		1.1001	0.937839		1.1001	0.937299		1.1001	0.937099		1.1	0.940524		1.1	0.932725		1.1001	0.944158		1.1001	0.93758		1.1	0.938373		1.1	0.93715		1.1001	0.939535
1.1501	0.933665		1.1501	0.933992		1.1501	0.935658		1.15	0.93491		1.15	0.936945		1.1501	0.936224		1.1501	0.932717		1.1501	0.937569		1.1501	0.934261		1.15	0.939819		1.15	0.932602		1.1501	0.942499		1.1501	0.936347		1.15	0.936746		1.15	0.934561		1.1501	0.935483
1.2001	0.931151		1.2001	0.934403		1.2001	0.933905		1.2	0.934088		1.2	0.933087		1.2001	0.935302		1.2001	0.936204		1.2001	0.936493		1.2001	0.933685		1.2	0.939244		1.2	0.933588		1.2001	0.94158		1.2001	0.932948		1.2	0.935972		1.2	0.93071		1.2001	0.937336
1.2501	0.931848		1.2501	0.932974		1.2501	0.936082		1.25	0.932039		1.25	0.933522		1.2501	0.934238		1.2501	0.935487		1.2501	0.936373		1.2501	0.935758		1.25	0.93973		1.2501	0.93083		1.2501	0.941745		1.2501	0.933974		1.25	0.937558		1.25	0.932961		1.2501	0.93594
1.3001	0.932425		1.3001	0.93222		1.3001	0.933551		1.3	0.933426		1.3	0.931749		1.3001	0.931472		1.3001	0.934681		1.3001	0.936344		1.3001	0.932452		1.3001	0.937621		1.3001	0.929868		1.3001	0.940812		1.3001	0.930676		1.3	0.93494		1.3	0.93204		1.3001	0.933994
1.3501	0.932196		1.3501	0.931525		1.3501	0.93325		1.35	0.929658		1.35	0.932457		1.3501	0.932711		1.3501	0.931615		1.3501	0.935179		1.3501	0.930281		1.3501	0.934329		1.3501	0.930288		1.3501	0.940606		1.3501	0.931132		1.35	0.933168		1.35	0.930906		1.3501	0.935975
1.4001	0.931895		1.4001	0.933776		1.4001	0.931716		1.4	0.930909		1.4	0.93009		1.4001	0.932175		1.4001	0.928313		1.4001	0.934324		1.4001	0.93024		1.4001	0.937861		1.4001	0.928979		1.4001	0.941473		1.4001	0.933056		1.4	0.936033		1.4	0.930304		1.4001	0.934428
1.4501	0.928848		1.4501	0.931844		1.4501	0.929339		1.45	0.92631		1.45	0.929168		1.4501	0.933538		1.4501	0.930018		1.4501	0.934123		1.4501	0.929654		1.4501	0.935836		1.4501	0.927613		1.4501	0.937892		1.4501	0.930346		1.45	0.934014		1.4501	0.9265		1.4501	0.930954
1.5001	0.927027		1.5001	0.93146		1.5001	0.927628		1.5	0.929239		1.5	0.928893		1.5001	0.931255		1.5001	0.930708		1.5001	0.933395		1.5001	0.929998		1.5001	0.93532		1.5001	0.926167		1.5001	0.939689		1.5001	0.92892		1.5	0.932383		1.5001	0.928842		1.5001	0.9326
1.5501	0.927575		1.5501	0.9296		1.5501	0.930285		1.55	0.927605		1.55	0.926899		1.5501	0.930598		1.5501	0.928344		1.5501	0.928862		1.5501	0.927456		1.5501	0.93676		1.5501	0.928156		1.5501	0.937694		1.5501	0.92884		1.5501	0.931722		1.5501	0.92799		1.5501	0.934067
1.6001	0.924362		1.6001	0.928377		1.6001	0.927327		1.6	0.926034		1.6	0.926007		1.6001	0.931195		1.6001	0.927883		1.6001	0.933573		1.6001	0.927031		1.6001	0.934017		1.6001	0.925363		1.6001	0.93477		1.6001	0.929196		1.6001	0.933453		1.6001	0.92828		1.6001	0.930881
1.6501	0.924916		1.6501	0.925886		1.6501	0.92913		1.65	0.926514		1.65	0.92663		1.6501	0.927983		1.6501	0.928779		1.6501	0.929836		1.6501	0.927129		1.6501	0.932198		1.6501	0.926574		1.6501	0.938002		1.6501	0.928186		1.6501	0.934054		1.6501	0.925426		1.6501	0.932347
1.7001	0.921721		1.7001	0.924632		1.7001	0.925763		1.7	0.927406		1.7001	0.925458		1.7001	0.929394		1.7001	0.929905		1.7001	0.93136		1.7001	0.923251		1.7001	0.932713		1.7001	0.926423		1.7001	0.937096		1.7001	0.926238		1.7001	0.930783		1.7001	0.9289		1.7001	0.930194
1.7501	0.924755		1.7501	0.925731		1.7501	0.925733		1.7501	0.926392		1.7501	0.923275		1.7501	0.926971		1.7501	0.925144		1.7501	0.9306		1.7501	0.925217		1.7501	0.931771		1.7501	0.924204		1.7501	0.940284		1.7501	0.923712		1.7501	0.931895		1.7501	0.922417		1.7501	0.92873
1.8001	0.92298		1.8001	0.924738		1.8001	0.92607		1.8001	0.923893		1.8001	0.925754		1.8001	0.926312		1.8001	0.925808		1.8001	0.928894		1.8001	0.924018		1.8001	0.930956		1.8001	0.924508		1.8001	0.937468		1.8001	0.921292		1.8001	0.928091		1.8001	0.926204		1.8001	0.926938
1.8501	0.921924		1.8501	0.923644		1.8501	0.925897		1.8501	0.923262		1.8501	0.924299		1.8501	0.926617		1.8501	0.925151		1.8501	0.930138		1.8501	0.925622		1.8501	0.932248		1.8501	0.920793		1.8501	0.935957		1.8501	0.925929		1.8501	0.930616		1.8501	0.924216		1.8501	0.927069
1.9001	0.922997		1.9001	0.925296		1.9001	0.923389		1.9001	0.925446		1.9001	0.925745		1.9001	0.926292		1.9001	0.924015		1.9001	0.928501		1.9001	0.925209		1.9001	0.928403		1.9001	0.92522		1.9001	0.935876		1.9001	0.925037		1.9001	0.928376		1.9001	0.923525		1.9001	0.925959
1.9501	0.92076		1.9501	0.923027		1.9501	0.926202		1.9501	0.924786		1.9501	0.923653		1.9501	0.925937		1.9501	0.923706		1.9501	0.929366		1.9501	0.924284		1.9501	0.928569		1.9501	0.923354		1.9501	0.934698		1.9501	0.9229		1.9501	0.927394		1.9501	0.921408		1.9501	0.927493
2.0001	0.917598		2.0001	0.924753		2.0001	0.922548		2.0001	0.925651		2.0001	0.92414		2.0001	0.923416		2.0001	0.919263		2.0001	0.923595		2.0002	0.923023		2.0001	0.930686		2.0001	0.922521		2.0001	0.934773		2.0001	0.921782		2.0001	0.926462		2.0001	0.921732		2.0001	0.92851
2.0501	0.923409		2.0501	0.920542		2.0501	0.923266		2.0501	0.923357		2.0501	0.921362		2.0501	0.925055		2.0501	0.923468		2.0501	0.927324		2.0502	0.922392		2.0501	0.929141		2.0501	0.923153		2.0501	0.931583		2.0501	0.921749		2.0501	0.928325		2.0501	0.921799		2.0501	0.924885
2.1001	0.918618		2.1001	0.919702		2.1001	0.920721		2.1001	0.921608		2.1001	0.919744		2.1001	0.923071		2.1001	0.922597		2.1002	0.925184		2.1002	0.9213		2.1001	0.928058		2.1001	0.91923		2.1001	0.934278		2.1001	0.922479		2.1001	0.926918		2.1001	0.922223		2.1001	0.927251
2.1501	0.919786		2.1501	0.921194		2.1501	0.922402		2.1501	0.920958		2.1501	0.919215		2.1501	0.923662		2.1501	0.922419		2.1502	0.921549		2.1502	0.918436		2.1501	0.927623		2.1501	0.919927		2.1501	0.932417		2.1501	0.919788		2.1501	0.925315		2.1501	0.918218		2.1501	0.927287
2.2001	0.917593		2.2001	0.919743		2.2001	0.92089		2.2001	0.919111		2.2001	0.920642		2.2001	0.923736		2.2001	0.918586		2.2002	0.92241		2.2002	0.919625		2.2001	0.92926		2.2001	0.919329		2.2001	0.932857		2.2001	0.921705		2.2001	0.923799		2.2001	0.917359		2.2001	0.923986
2.2501	0.917596		2.2501	0.920136		2.2501	0.919975		2.2501	0.922087		2.2501	0.919862		2.2501	0.923894		2.2501	0.921844		2.2502	0.926317		2.2502	0.917892		2.2501	0.925634		2.2501	0.916408		2.2501	0.93033		2.2501	0.919503		2.2501	0.923181		2.2501	0.920204		2.2501	0.923896
2.3001	0.91745		2.3001	0.918789		2.3001	0.920623		2.3001	0.921348		2.3001	0.919362		2.3001	0.922855		2.3001	0.923552		2.3002	0.925047		2.3002	0.920718		2.3001	0.926727		2.3001	0.918865		2.3001	0.933134		2.3002	0.918088		2.3001	0.924887		2.3001	0.919376		2.3001	0.922048
2.3501	0.916273		2.3501	0.916692		2.3502	0.918845		2.3501	0.917911		2.3501	0.920381		2.3501	0.923453		2.3501	0.919621		2.3502	0.92577		2.3502	0.918879		2.3501	0.92494		2.3501	0.916622		2.3502	0.929592		2.3502	0.919461		2.3501	0.920904		2.3501	0.922739		2.3501	0.923367
2.4002	0.913269		2.4001	0.915234		2.4002	0.922214		2.4001	0.917426		2.4001	0.916846		2.4001	0.923058		2.4001	0.917054		2.4002	0.9228		2.4002	0.918214		2.4001	0.926653		2.4001	0.917502		2.4002	0.933462		2.4002	0.916894		2.4001	0.926016		2.4001	0.918401		2.4001	0.924618
2.4502	0.915416		2.4502	0.916766		2.4502	0.918111		2.4501	0.918277		2.4501	0.916915		2.4501	0.918745		2.4501	0.919547		2.4502	0.923071		2.4502	0.915013		2.4501	0.924828		2.4501	0.92023		2.4502	0.932819		2.4502	0.920842		2.4501	0.921858		2.4501	0.916614		2.4501	0.922009
2.5002	0.917108		2.5002	0.920087		2.5002	0.917798		2.5001	0.920484		2.5001	0.9175		2.5001	0.917929		2.5001	0.9197		2.5002	0.923222		2.5002	0.915757		2.5001	0.923795		2.5001	0.91344		2.5002	0.928697		2.5002	0.917771		2.5001	0.921635		2.5001	0.916491		2.5001	0.919574
2.5502	0.9156		2.5502	0.917696		2.5502	0.918675		2.5501	0.917789		2.5501	0.919024		2.5501	0.918443		2.5501	0.915058		2.5502	0.921769		2.5502	0.917499		2.5501	0.925472		2.5501	0.91174		2.5502	0.933899		2.5502	0.917065		2.5501	0.922303		2.5501	0.914327		2.5501	0.920911
2.6002	0.912049		2.6002	0.912266		2.6002	0.916053		2.6001	0.916631		2.6001	0.914621		2.6001	0.918009		2.6001	0.918026		2.6002	0.923921		2.6002	0.916368		2.6001	0.922757		2.6001	0.91402		2.6002	0.930775		2.6002	0.918323		2.6001	0.920454		2.6001	0.915353		2.6001	0.919495
2.6502	0.913393		2.6502	0.917564		2.6502	0.913679		2.6501	0.916926		2.6501	0.918097		2.6501	0.917501		2.6501	0.914264		2.6502	0.922072		2.6502	0.912792		2.6501	0.924663		2.6501	0.914722		2.6502	0.930711		2.6502	0.916242		2.6501	0.918931		2.6501	0.916468		2.6502	0.918278
2.7002	0.912111		2.7002	0.914995		2.7002	0.915041		2.7001	0.915152		2.7001	0.913014		2.7001	0.91586		2.7001	0.915761		2.7002	0.92008		2.7002	0.916168		2.7001	0.923607		2.7001	0.915969		2.7002	0.929394		2.7002	0.915565		2.7001	0.922409		2.7001	0.910777		2.7002	0.921104
2.7502	0.911191		2.7502	0.915518		2.7502	0.916094		2.7501	0.917046		2.7501	0.914284		2.7501	0.91642		2.7501	0.916308		2.7502	0.920527		2.7502	0.915006		2.7501	0.920303		2.7501	0.91453		2.7502	0.928122		2.7502	0.913938		2.7501	0.920984		2.7501	0.914892		2.7502	0.917937
2.8002	0.908997		2.8002	0.915682		2.8002	0.915119		2.8001	0.915136		2.8001	0.916367		2.8002	0.917991		2.8002	0.912636		2.8002	0.920784		2.8002	0.91497		2.8001	0.922362		2.8001	0.916491		2.8002	0.930855		2.8002	0.916004		2.8001	0.920968		2.8001	0.91138		2.8002	0.919886
2.8502	0.907162		2.8502	0.912653		2.8502	0.914232		2.8501	0.912245		2.8501	0.913181		2.8502	0.918653		2.8502	0.914637		2.8502	0.917839		2.8502	0.914439		2.8501	0.922234		2.8501	0.912424		2.8502	0.927231		2.8502	0.91304		2.8501	0.920043		2.8501	0.915014		2.8502	0.916807
2.9002	0.908384		2.9002	0.91008		2.9002	0.915583		2.9001	0.912393		2.9001	0.911949		2.9002	0.915757		2.9002	0.914328		2.9002	0.917781		2.9002	0.913295		2.9001	0.923568		2.9001	0.913627		2.9002	0.923993		2.9002	0.909445		2.9001	0.919738		2.9001	0.914192		2.9002	0.91942
2.9502	0.905926		2.9502	0.914559		2.9502	0.913778		2.9501	0.913629		2.9501	0.912653		2.9502	0.916855		2.9502	0.911903		2.9502	0.916523		2.9502	0.913005		2.9501	0.922824		2.9501	0.912902		2.9502	0.929493		2.9502	0.911308		2.9501	0.917914		2.9501	0.913966		2.9502	0.913613
3.0002	0.906601		3.0002	0.914198		3.0002	0.912844		3.0001	0.913516		3.0001	0.912905		3.0002	0.914207		3.0002	0.914315		3.0002	0.918971		3.0002	0.909085		3.0001	0.923371		3.0001	0.910507		3.0002	0.925931		3.0002	0.913558		3.0001	0.918951		3.0001	0.910378		3.0002	0.918066
3.0502	0.904856		3.0502	0.911783		3.0502	0.910938		3.0501	0.914816		3.0501	0.91041		3.0502	0.912994		3.0502	0.911446		3.0502	0.917222		3.0502	0.913906		3.0501	0.921323		3.0502	0.907899		3.0502	0.924821		3.0502	0.910448		3.0501	0.916674		3.0501	0.913081		3.0502	0.916752
3.1002	0.906515		3.1002	0.912411		3.1002	0.912704		3.1001	0.911878		3.1001	0.910468		3.1002	0.913549		3.1002	0.913344		3.1002	0.917496		3.1002	0.908583		3.1002	0.921286		3.1002	0.908178		3.1002	0.925817		3.1002	0.909188		3.1001	0.918834		3.1001	0.912691		3.1002	0.915944
3.1502	0.907903		3.1502	0.910401		3.1502	0.910472		3.1501	0.908989		3.1501	0.910958		3.1502	0.915658		3.1502	0.910023		3.1502	0.919125		3.1502	0.908571		3.1502	0.920093		3.1502	0.910542		3.1502	0.926144		3.1502	0.911424		3.1501	0.918245		3.1501	0.912019		3.1502	0.917194
3.2002	0.905617		3.2002	0.910655		3.2002	0.909698		3.2001	0.912767		3.2001	0.911591		3.2002	0.912299		3.2002	0.911716		3.2002	0.915366		3.2002	0.910266		3.2002	0.920486		3.2002	0.91048		3.2002	0.923877		3.2002	0.907207		3.2001	0.917478		3.2001	0.909652		3.2002	0.913855
3.2502	0.906742		3.2502	0.912585		3.2502	0.908833		3.2501	0.908758		3.2501	0.910383		3.2502	0.911969		3.2502	0.911905		3.2502	0.914129		3.2502	0.912624		3.2502	0.919729		3.2502	0.908835		3.2502	0.925427		3.2502	0.910915		3.2501	0.916712		3.2502	0.909039		3.2502	0.915214
3.3002	0.904286		3.3002	0.912671		3.3002	0.913448		3.3001	0.909145		3.3001	0.909393		3.3002	0.912381		3.3002	0.910311		3.3002	0.912531		3.3002	0.911254		3.3002	0.922247		3.3002	0.910441		3.3002	0.922529		3.3002	0.911497		3.3001	0.916659		3.3002	0.910541		3.3002	0.915068
3.3502	0.905057		3.3502	0.911276		3.3502	0.909159		3.3501	0.910812		3.3501	0.909771		3.3502	0.912344		3.3502	0.911419		3.3502	0.914449		3.3502	0.909006		3.3502	0.918815		3.3502	0.908119		3.3502	0.923501		3.3502	0.910993		3.3501	0.915327		3.3502	0.908631		3.3502	0.914075
3.4002	0.906251		3.4002	0.910403		3.4002	0.911247		3.4001	0.911011		3.4001	0.907625		3.4002	0.912045		3.4002	0.908763		3.4002	0.913785		3.4002	0.907824		3.4002	0.917943		3.4002	0.906307		3.4002	0.92675		3.4002	0.90873		3.4002	0.9165		3.4002	0.909515		3.4002	0.914942
3.4502	0.901894		3.4502	0.910207		3.4502	0.910227		3.4501	0.908921		3.4501	0.907831		3.4502	0.911284		3.4502	0.910748		3.4502	0.915634		3.4502	0.910073		3.4502	0.918605		3.4502	0.907499		3.4502	0.924535		3.4502	0.910246		3.4502	0.913796		3.4502	0.90805		3.4502	0.915481
3.5002	0.899174		3.5002	0.909724		3.5002	0.910686		3.5001	0.910339		3.5002	0.908637		3.5002	0.912168		3.5002	0.905493		3.5002	0.912983		3.5002	0.908987		3.5002	0.916083		3.5002	0.909932		3.5002	0.919395		3.5002	0.908312		3.5002	0.914488		3.5002	0.910674		3.5002	0.913029
3.5502	0.900573		3.5502	0.908314		3.5502	0.907264		3.5501	0.909822		3.5502	0.909086		3.5502	0.907726		3.5502	0.909935		3.5502	0.91002		3.5502	0.908208		3.5502	0.919142		3.5502	0.906439		3.5502	0.924462		3.5502	0.909453		3.5502	0.914303		3.5502	0.905694		3.5502	0.912269
3.6002	0.902914		3.6002	0.908492		3.6002	0.906283		3.6002	0.906898		3.6002	0.908507		3.6002	0.911309		3.6002	0.909843		3.6002	0.915227		3.6002	0.908333		3.6002	0.916766		3.6002	0.907756		3.6002	0.920798		3.6002	0.907577		3.6002	0.915523		3.6002	0.907866		3.6002	0.911841
3.6502	0.898269		3.6502	0.906936		3.6502	0.907232		3.6502	0.907543		3.6502	0.906854		3.6502	0.909585		3.6502	0.909893		3.6502	0.913951		3.6502	0.909412		3.6502	0.916803		3.6502	0.907973		3.6502	0.922652		3.6502	0.90514		3.6502	0.914753		3.6502	0.904046		3.6502	0.90979
3.7002	0.901828		3.7002	0.910956		3.7002	0.906057		3.7002	0.907597		3.7002	0.90891		3.7002	0.907785		3.7002	0.909242		3.7002	0.914129		3.7002	0.906763		3.7002	0.915968		3.7002	0.903501		3.7002	0.920588		3.7002	0.90736		3.7002	0.912287		3.7002	0.905131		3.7002	0.914275
3.7502	0.898706		3.7502	0.908318		3.7502	0.906427		3.7502	0.906027		3.7502	0.904173		3.7502	0.908364		3.7502	0.908394		3.7502	0.910657		3.7502	0.906989		3.7502	0.913271		3.7502	0.904378		3.7502	0.922752		3.7502	0.905258		3.7502	0.911395		3.7502	0.904721		3.7502	0.911851
3.8002	0.900159		3.8002	0.906919		3.8002	0.905388		3.8002	0.905307		3.8002	0.907075		3.8002	0.907679		3.8002	0.904013		3.8002	0.911845		3.8003	0.905257		3.8002	0.91547		3.8002	0.905658		3.8002	0.92318		3.8002	0.908059		3.8002	0.911191		3.8002	0.903088		3.8002	0.911572
3.8502	0.899608		3.8502	0.905093		3.8502	0.907247		3.8502	0.908747		3.8502	0.90639		3.8502	0.907526		3.8502	0.905462		3.8502	0.911323		3.8503	0.906676		3.8502	0.91498		3.8502	0.905682		3.8502	0.918153		3.8502	0.906111		3.8502	0.913231		3.8502	0.903977		3.8502	0.910524
3.9002	0.897765		3.9002	0.908271		3.9002	0.905345		3.9002	0.909326		3.9002	0.905667		3.9002	0.908075		3.9002	0.90563		3.9003	0.911637		3.9003	0.90594		3.9002	0.91434		3.9002	0.90224		3.9002	0.923287		3.9002	0.903643		3.9002	0.911529		3.9002	0.902378		3.9002	0.911638
3.9502	0.895639		3.9502	0.90207		3.9502	0.903881		3.9502	0.905065		3.9502	0.906843		3.9502	0.907832		3.9502	0.906177		3.9503	0.911559		3.9503	0.904484		3.9502	0.913503		3.9502	0.899692		3.9502	0.923347		3.9502	0.907972		3.9502	0.912337		3.9502	0.904248		3.9502	0.910338
4.0002	0.898291		4.0002	0.905949		4.0002	0.905392		4.0002	0.90464		4.0002	0.903714		4.0002	0.908389		4.0002	0.903922		4.0003	0.910553		4.0003	0.902714		4.0002	0.91337		4.0002	0.903391		4.0002	0.921709		4.0002	0.904376		4.0002	0.910828		4.0002	0.903642		4.0002	0.911451
4.0502	0.897614		4.0502	0.903211		4.0502	0.906917		4.0502	0.90646		4.0502	0.90457		4.0502	0.906567		4.0502	0.90323		4.0503	0.910304		4.0503	0.901438		4.0502	0.913288		4.0502	0.904333		4.0502	0.921903		4.0502	0.901278		4.0502	0.90865		4.0502	0.904357		4.0502	0.909917
4.1002	0.897688		4.1002	0.906617		4.1002	0.90306		4.1002	0.903789		4.1002	0.904006		4.1002	0.906379		4.1002	0.904849		4.1003	0.909464		4.1003	0.90541		4.1002	0.913039		4.1002	0.901108		4.1002	0.917782		4.1003	0.904312		4.1002	0.908557		4.1002	0.903845		4.1002	0.907349
4.1502	0.894259		4.1502	0.902675		4.1503	0.905443		4.1502	0.908081		4.1502	0.90295		4.1502	0.903789		4.1502	0.90319		4.1503	0.906214		4.1503	0.903736		4.1502	0.913725		4.1502	0.901154		4.1503	0.918063		4.1503	0.901807		4.1502	0.910975		4.1502	0.90244		4.1502	0.91069
4.2003	0.89707		4.2002	0.902139		4.2003	0.90433		4.2002	0.903538		4.2002	0.905378		4.2002	0.905268		4.2002	0.904309		4.2003	0.909369		4.2003	0.90308		4.2002	0.91122		4.2002	0.902563		4.2003	0.917403		4.2003	0.902615		4.2002	0.908207		4.2002	0.901019		4.2002	0.909742
4.2503	0.898989		4.2502	0.903593		4.2503	0.899699		4.2502	0.904079		4.2502	0.903735		4.2502	0.905929		4.2502	0.903528		4.2503	0.907254		4.2503	0.905263		4.2502	0.9129		4.2502	0.90069		4.2503	0.916647		4.2503	0.902116		4.2502	0.907276		4.2502	0.90233		4.2502	0.907664
4.3003	0.896319		4.3003	0.903437		4.3003	0.900555		4.3002	0.902849		4.3002	0.900526		4.3002	0.907344		4.3002	0.903564		4.3003	0.907265		4.3003	0.903744		4.3002	0.91349		4.3002	0.900452		4.3003	0.918624		4.3003	0.900372		4.3002	0.908949		4.3002	0.903364		4.3002	0.908486
4.3503	0.896574		4.3503	0.900596		4.3503	0.899713		4.3502	0.900655		4.3502	0.903827		4.3502	0.906179		4.3502	0.903695		4.3503	0.907341		4.3503	0.901055		4.3502	0.911443		4.3502	0.897093		4.3503	0.919664		4.3503	0.901954		4.3502	0.907601		4.3502	0.900591		4.3502	0.906629
4.4003	0.896413		4.4003	0.902295		4.4003	0.900867		4.4002	0.903453		4.4002	0.899969		4.4002	0.902435		4.4002	0.903097		4.4003	0.902681		4.4003	0.900173		4.4002	0.911382		4.4002	0.901163		4.4003	0.920279		4.4003	0.902786		4.4002	0.9074		4.4002	0.898721		4.4002	0.906054
4.4503	0.892678		4.4503	0.899328		4.4503	0.90052		4.4502	0.900696		4.4502	0.903531		4.4502	0.902314		4.4502	0.90377		4.4503	0.90776		4.4503	0.899622		4.4502	0.912696		4.4502	0.899633		4.4503	0.918782		4.4503	0.901434		4.4502	0.910086		4.4502	0.899358		4.4503	0.90599
4.5003	0.890435		4.5003	0.901701		4.5003	0.898003		4.5002	0.9009		4.5002	0.901469		4.5002	0.902366		4.5002	0.903644		4.5003	0.904105		4.5003	0.900153		4.5002	0.91446		4.5002	0.902181		4.5003	0.919335		4.5003	0.899254		4.5002	0.909901		4.5002	0.900621		4.5003	0.906446
4.5503	0.893434		4.5503	0.9022		4.5503	0.901958		4.5502	0.900889		4.5502	0.903006		4.5502	0.902566		4.5502	0.900564		4.5503	0.906657		4.5503	0.903659		4.5502	0.914992		4.5502	0.901406		4.5503	0.916123		4.5503	0.901744		4.5502	0.912103		4.5502	0.898561		4.5503	0.90775
4.6003	0.894999		4.6003	0.897293		4.6003	0.90012		4.6002	0.901147		4.6002	0.902613		4.6002	0.902396		4.6003	0.900816		4.6003	0.906347		4.6003	0.900799		4.6002	0.909045		4.6002	0.898522		4.6003	0.917154		4.6003	0.899747		4.6002	0.907743		4.6002	0.899591		4.6003	0.905906
4.6503	0.893382		4.6503	0.898249		4.6503	0.900219		4.6502	0.902714		4.6502	0.900187		4.6503	0.903165		4.6503	0.899262		4.6503	0.907373		4.6503	0.899713		4.6502	0.912253		4.6502	0.89733		4.6503	0.914591		4.6503	0.900995		4.6502	0.905904		4.6502	0.901791		4.6503	0.907143
4.7003	0.892916		4.7003	0.899942		4.7003	0.90244		4.7002	0.902225		4.7002	0.899135		4.7003	0.901903		4.7003	0.900255		4.7003	0.906673		4.7003	0.900407		4.7002	0.90906		4.7002	0.897496		4.7003	0.917847		4.7003	0.897472		4.7002	0.905857		4.7002	0.901355		4.7003	0.904045
4.7503	0.891318		4.7503	0.899168		4.7503	0.902698		4.7502	0.899964		4.7502	0.901911		4.7503	0.901984		4.7503	0.898409		4.7503	0.903		4.7503	0.898952		4.7502	0.908952		4.7502	0.899202		4.7503	0.91505		4.7503	0.899223		4.7502	0.905149		4.7502	0.897829		4.7503	0.907311
4.8003	0.889193		4.8003	0.89846		4.8003	0.897108		4.8002	0.899616		4.8002	0.897874		4.8003	0.902395		4.8003	0.899457		4.8003	0.90488		4.8003	0.89957		4.8002	0.908871		4.8002	0.897343		4.8003	0.917617		4.8003	0.900151		4.8002	0.904795		4.8002	0.896167		4.8003	0.903863
4.8503	0.893056		4.8503	0.895075		4.8503	0.900619		4.8502	0.899116		4.8502	0.89949		4.8503	0.899732		4.8503	0.901112		4.8503	0.905547		4.8503	0.899486		4.8502	0.909211		4.8502	0.897558		4.8503	0.915403		4.8503	0.897523		4.8502	0.905378		4.8502	0.898246		4.8503	0.907121
4.9003	0.891739		4.9003	0.897179		4.9003	0.89766		4.9002	0.900296		4.9002	0.895912		4.9003	0.901546		4.9003	0.898159		4.9003	0.902312		4.9003	0.898854		4.9002	0.905573		4.9003	0.898226		4.9003	0.912284		4.9003	0.897428		4.9002	0.904217		4.9002	0.900124		4.9003	0.903605
4.9503	0.89164		4.9503	0.901074		4.9503	0.89728		4.9502	0.899827		4.9502	0.89767		4.9503	0.901759		4.9503	0.900891		4.9503	0.904197		4.9503	0.897429		4.9503	0.907633		4.9503	0.899367		4.9503	0.916382		4.9503	0.897192		4.9502	0.904629		4.9502	0.897544		4.9503	0.90455
5.0003	0.890468		5.0003	0.897677		5.0003	0.899896		5.0002	0.894998		5.0002	0.899394		5.0003	0.897825		5.0003	0.901586		5.0003	0.902728		5.0003	0.898972		5.0003	0.907049		5.0003	0.896323		5.0003	0.915499		5.0003	0.899371		5.0002	0.900995		5.0002	0.896086		5.0003	0.903787
5.0503	0.888138		5.0503	0.897394		5.0503	0.89752		5.0502	0.896792		5.0502	0.897589		5.0503	0.90047		5.0503	0.901194		5.0503	0.904403		5.0503	0.894154		5.0503	0.90766		5.0503	0.898493		5.0503	0.917459		5.0503	0.894961		5.0502	0.905069		5.0502	0.895333		5.0503	0.903596
5.1003	0.889651		5.1003	0.900109		5.1003	0.898464		5.1002	0.899596		5.1002	0.897503		5.1003	0.901316		5.1003	0.898377		5.1003	0.904281		5.1003	0.898471		5.1003	0.906774		5.1003	0.896251		5.1003	0.9158		5.1003	0.898164		5.1002	0.902946		5.1003	0.896839		5.1003	0.901392
5.1503	0.887733		5.1503	0.895485		5.1503	0.8965		5.1502	0.896735		5.1502	0.901761		5.1503	0.900615		5.1503	0.89559		5.1503	0.902535		5.1503	0.897031		5.1503	0.908021		5.1503	0.89604		5.1503	0.913529		5.1503	0.898963		5.1502	0.905768		5.1503	0.898457		5.1503	0.901823
5.2003	0.886718		5.2003	0.89748		5.2003	0.899922		5.2002	0.897201		5.2002	0.897168		5.2003	0.899404		5.2003	0.898107		5.2003	0.899955		5.2003	0.897171		5.2003	0.907268		5.2003	0.897156		5.2003	0.913363		5.2003	0.898405		5.2003	0.902236		5.2003	0.895805		5.2003	0.902635
5.2503	0.888381		5.2503	0.896386		5.2503	0.894668		5.2502	0.896451		5.2502	0.89773		5.2503	0.901056		5.2503	0.897597		5.2503	0.903899		5.2503	0.899081		5.2503	0.908926		5.2503	0.896369		5.2503	0.914246		5.2503	0.894868		5.2503	0.899949		5.2503	0.895773		5.2503	0.902991
5.3003	0.884951		5.3003	0.891454		5.3003	0.895482		5.3002	0.895938		5.3002	0.897803		5.3003	0.898665		5.3003	0.897268		5.3003	0.902301		5.3003	0.897298		5.3003	0.907444		5.3003	0.898018		5.3003	0.913865		5.3003	0.898319		5.3003	0.904529		5.3003	0.892698		5.3003	0.89948
5.3503	0.88586		5.3503	0.893898		5.3503	0.898574		5.3502	0.896865		5.3503	0.894		5.3503	0.900066		5.3503	0.895575		5.3503	0.898899		5.3503	0.898494		5.3503	0.906604		5.3503	0.896381		5.3503	0.913195		5.3503	0.894043		5.3503	0.905792		5.3503	0.894043		5.3503	0.899812
5.4003	0.887166		5.4003	0.894984		5.4003	0.895568		5.4003	0.898103		5.4003	0.896729		5.4003	0.900929		5.4003	0.897181		5.4003	0.90368		5.4003	0.894148		5.4003	0.905341		5.4003	0.894798		5.4003	0.915243		5.4003	0.891552		5.4003	0.903011		5.4003	0.894266		5.4003	0.900213
5.4503	0.886801		5.4503	0.89353		5.4503	0.893954		5.4503	0.899436		5.4503	0.896141		5.4503	0.89929		5.4503	0.895786		5.4503	0.90231		5.4503	0.897089		5.4503	0.904673		5.4503	0.893347		5.4503	0.912537		5.4503	0.894211		5.4503	0.897739		5.4503	0.895379		5.4503	0.901908
5.5003	0.884844		5.5003	0.896969		5.5003	0.895863		5.5003	0.898529		5.5003	0.895072		5.5003	0.899804		5.5003	0.897902		5.5003	0.90058		5.5003	0.895889		5.5003	0.905218		5.5003	0.893679		5.5003	0.912503		5.5003	0.896052		5.5003	0.900842		5.5003	0.892426		5.5003	0.901869
5.5503	0.889263		5.5503	0.896999		5.5503	0.894878		5.5503	0.897456		5.5503	0.895389		5.5503	0.895758		5.5503	0.890631		5.5503	0.900339		5.5503	0.897489		5.5503	0.908119		5.5503	0.893105		5.5503	0.914806		5.5503	0.89386		5.5503	0.904553		5.5503	0.891578		5.5503	0.901362
5.6003	0.887398		5.6003	0.896035		5.6003	0.896168		5.6003	0.895265		5.6003	0.893312		5.6003	0.896536		5.6003	0.895529		5.6003	0.901663		5.6003	0.893829		5.6003	0.903065		5.6003	0.891294		5.6003	0.913456		5.6003	0.891697		5.6003	0.902714		5.6003	0.892664		5.6003	0.903222
5.6503	0.881215		5.6503	0.890916		5.6503	0.893087		5.6503	0.895213		5.6503	0.897026		5.6503	0.897544		5.6503	0.894492		5.6503	0.900683		5.6504	0.894337		5.6503	0.904548		5.6503	0.89251		5.6503	0.910752		5.6503	0.893274		5.6503	0.899929		5.6503	0.893309		5.6503	0.90068
5.7003	0.885526		5.7003	0.894105		5.7003	0.897448		5.7003	0.895235		5.7003	0.895961		5.7003	0.897227		5.7003	0.89649		5.7003	0.898987		5.7004	0.894571		5.7003	0.903895		5.7003	0.8937		5.7003	0.911887		5.7003	0.895198		5.7003	0.902662		5.7003	0.891653		5.7003	0.89945
5.7503	0.883588		5.7503	0.897189		5.7503	0.896177		5.7503	0.89262		5.7503	0.894627		5.7503	0.894744		5.7503	0.895627		5.7504	0.899695		5.7504	0.894208		5.7503	0.90511		5.7503	0.892418		5.7503	0.911328		5.7503	0.892107		5.7503	0.902238		5.7503	0.892416		5.7503	0.899526
5.8003	0.888849		5.8003	0.890358		5.8003	0.89439		5.8003	0.89298		5.8003	0.894915		5.8003	0.895956		5.8003	0.894516		5.8004	0.899373		5.8004	0.892215		5.8003	0.903347		5.8003	0.892312		5.8003	0.912814		5.8003	0.893204		5.8003	0.901033		5.8003	0.894014		5.8003	0.90179
5.8503	0.884344		5.8503	0.894561		5.8503	0.892451		5.8503	0.897069		5.8503	0.89654		5.8503	0.896639		5.8503	0.896209		5.8504	0.900035		5.8504	0.891685		5.8503	0.903094		5.8503	0.890503		5.8503	0.912729		5.8503	0.892732		5.8503	0.904127		5.8503	0.890149		5.8503	0.8987
5.9003	0.882741		5.9003	0.891192		5.9003	0.890699		5.9003	0.892549		5.9003	0.889192		5.9003	0.896834		5.9003	0.891628		5.9004	0.902192		5.9004	0.893615		5.9003	0.902406		5.9003	0.892737		5.9003	0.910536		5.9003	0.893359		5.9003	0.900755		5.9003	0.89163		5.9003	0.901618
5.9503	0.885203		5.9503	0.894966		5.9503	0.895173		5.9503	0.894758		5.9503	0.893897		5.9503	0.895749		5.9503	0.892827		5.9504	0.899956		5.9504	0.892768		5.9503	0.902579		5.9503	0.893146		5.9503	0.911891		5.9504	0.891963		5.9503	0.901846		5.9503	0.892894		5.9503	0.901703
6.0003	0.882143		6.0003	0.892223		6.0004	0.891522		6.0003	0.895188		6.0003	0.895141		6.0003	0.894938		6.0003	0.891878		6.0004	0.898915		6.0004	0.890986		6.0003	0.907321		6.0003	0.886382		6.0004	0.910909		6.0004	0.893229		6.0003	0.899919		6.0003	0.891587		6.0003	0.899739
6.0504	0.883296		6.0503	0.892453		6.0504	0.892985		6.0503	0.892814		6.0503	0.892054		6.0503	0.896612		6.0503	0.894691		6.0504	0.897615		6.0504	0.889682		6.0503	0.903851		6.0503	0.891295		6.0504	0.909345		6.0504	0.89193		6.0503	0.899326		6.0503	0.889599		6.0503	0.900537
6.1004	0.882699		6.1004	0.892631		6.1004	0.895917		6.1003	0.893966		6.1003	0.893027		6.1003	0.894991		6.1003	0.894357		6.1004	0.896602		6.1004	0.89304		6.1003	0.900556		6.1003	0.891686		6.1004	0.912015		6.1004	0.893039		6.1003	0.900646		6.1003	0.890387		6.1003	0.897148
6.1504	0.882357		6.1504	0.89167		6.1504	0.893257		6.1503	0.894265		6.1503	0.892017		6.1503	0.892672		6.1503	0.892587		6.1504	0.898553		6.1504	0.890938		6.1503	0.901186		6.1503	0.890689		6.1504	0.912127		6.1504	0.891108		6.1503	0.897542		6.1503	0.890224		6.1503	0.899253
6.2004	0.880875		6.2004	0.89112		6.2004	0.890706		6.2003	0.89381		6.2003	0.893212		6.2003	0.896844		6.2003	0.8899		6.2004	0.896238		6.2004	0.891742		6.2003	0.902291		6.2003	0.888585		6.2004	0.909916		6.2004	0.890758		6.2003	0.90043		6.2003	0.888195		6.2003	0.899257
6.2504	0.882764		6.2504	0.890619		6.2504	0.893404		6.2503	0.892543		6.2503	0.891038		6.2503	0.896058		6.2503	0.892236		6.2504	0.899044		6.2504	0.892324		6.2503	0.900633		6.2503	0.890531		6.2504	0.908895		6.2504	0.8918		6.2503	0.897792		6.2503	0.889038		6.2503	0.898019
6.3004	0.879466		6.3004	0.890458		6.3004	0.890054		6.3003	0.894497		6.3003	0.891195		6.3003	0.892165		6.3003	0.891294		6.3004	0.899166		6.3004	0.887485		6.3003	0.901074		6.3003	0.890603		6.3004	0.909839		6.3004	0.892897		6.3003	0.898587		6.3003	0.889204		6.3004	0.897716
6.3504	0.881718		6.3504	0.89295		6.3504	0.893601		6.3503	0.891753		6.3503	0.892611		6.3503	0.892544		6.3503	0.894187		6.3504	0.898438		6.3504	0.891156		6.3503	0.900157		6.3503	0.890377		6.3504	0.907345		6.3504	0.890535		6.3503	0.898567		6.3503	0.890326		6.3504	0.894833
6.4004	0.878405		6.4004	0.887993		6.4004	0.891332		6.4003	0.889044		6.4003	0.891879		6.4003	0.893747		6.4003	0.88975		6.4004	0.898013		6.4004	0.891221		6.4003	0.899571		6.4003	0.889856		6.4004	0.910452		6.4004	0.891338		6.4003	0.899874		6.4003	0.885476		6.4004	0.895678
6.4504	0.881751		6.4504	0.891987		6.4504	0.892331		6.4503	0.891607		6.4503	0.88997		6.4504	0.892943		6.4504	0.892404		6.4504	0.89623		6.4504	0.891317		6.4503	0.899372		6.4503	0.888777		6.4504	0.908557		6.4504	0.893817		6.4503	0.899186		6.4503	0.887805		6.4504	0.898934
6.5004	0.88033		6.5004	0.891288		6.5004	0.889974		6.5003	0.892062		6.5003	0.891772		6.5004	0.89059		6.5004	0.891844		6.5004	0.898299		6.5004	0.889707		6.5003	0.901853		6.5003	0.886777		6.5004	0.907642		6.5004	0.890766		6.5003	0.898643		6.5003	0.888966		6.5004	0.893828
6.5504	0.880943		6.5504	0.890113		6.5504	0.890074		6.5503	0.893636		6.5503	0.891288		6.5504	0.893667		6.5504	0.888888		6.5504	0.895316		6.5504	0.888996		6.5503	0.900134		6.5503	0.890359		6.5504	0.907115		6.5504	0.888595		6.5503	0.898534		6.5503	0.890133		6.5504	0.897118
6.6004	0.877239		6.6004	0.895745		6.6004	0.889124		6.6003	0.893763		6.6003	0.893032		6.6004	0.89254		6.6004	0.889683		6.6004	0.897295		6.6004	0.891376		6.6003	0.898981		6.6003	0.888808		6.6004	0.908916		6.6004	0.888713		6.6003	0.89822		6.6003	0.887573		6.6004	0.898081
6.6504	0.880421		6.6504	0.888815		6.6504	0.889254		6.6503	0.889251		6.6503	0.889411		6.6504	0.891396		6.6504	0.888525		6.6504	0.893927		6.6504	0.889735		6.6503	0.897615		6.6503	0.890939		6.6504	0.90684		6.6504	0.892279		6.6503	0.897438		6.6503	0.887557		6.6504	0.895467
6.7004	0.877607		6.7004	0.890065		6.7004	0.887457		6.7003	0.890254		6.7003	0.891323		6.7004	0.892642		6.7004	0.891078		6.7004	0.892721		6.7004	0.889633		6.7003	0.901274		6.7004	0.888044		6.7004	0.906964		6.7004	0.891247		6.7003	0.897706		6.7003	0.886437		6.7004	0.895426
6.7504	0.878451		6.7504	0.887687		6.7504	0.890016		6.7503	0.891764		6.7503	0.888581		6.7504	0.892364		6.7504	0.890934		6.7504	0.896388		6.7504	0.890654		6.7504	0.901339		6.7504	0.885055		6.7504	0.911005		6.7504	0.889626		6.7503	0.89642		6.7503	0.888157		6.7504	0.89447
6.8004	0.881045		6.8004	0.890235		6.8004	0.887385		6.8003	0.888854		6.8003	0.887182		6.8004	0.890549		6.8004	0.885872		6.8004	0.893716		6.8004	0.889666		6.8004	0.898489		6.8004	0.887017		6.8004	0.906878		6.8004	0.887352		6.8003	0.896865		6.8003	0.889398		6.8004	0.895754
6.8504	0.880052		6.8504	0.885212		6.8504	0.888013		6.8503	0.8905		6.8503	0.890008		6.8504	0.893595		6.8504	0.890179		6.8504	0.896012		6.8504	0.888737		6.8504	0.899761		6.8504	0.887082		6.8504	0.906793		6.8504	0.889558		6.8503	0.898448		6.8503	0.88591		6.8504	0.896509
6.9004	0.877274		6.9004	0.887212		6.9004	0.88724		6.9003	0.890021		6.9003	0.890039		6.9004	0.890233		6.9004	0.888102		6.9004	0.894008		6.9004	0.886942		6.9004	0.901901		6.9004	0.886348		6.9004	0.907713		6.9004	0.889485		6.9003	0.895052		6.9004	0.885068		6.9004	0.893956
6.9504	0.880369		6.9504	0.888414		6.9504	0.885958		6.9503	0.888765		6.9503	0.889356		6.9504	0.891543		6.9504	0.890945		6.9504	0.892608		6.9504	0.885275		6.9504	0.899707		6.9504	0.886781		6.9504	0.906065		6.9504	0.887991		6.9503	0.898749		6.9504	0.887738		6.9504	0.892502
7.0004	0.876767		7.0004	0.886198		7.0004	0.891741		7.0003	0.887752		7.0003	0.889425		7.0004	0.889788		7.0004	0.888704		7.0004	0.897356		7.0004	0.886443		7.0004	0.896338		7.0004	0.887962		7.0004	0.906179		7.0004	0.885781		7.0003	0.89656		7.0004	0.88681		7.0004	0.892598
7.0504	0.87811		7.0504	0.888575		7.0504	0.887905		7.0503	0.887139		7.0503	0.88706		7.0504	0.890883		7.0504	0.887536		7.0504	0.894708		7.0504	0.888621		7.0504	0.896739		7.0504	0.887065		7.0504	0.908587		7.0504	0.889112		7.0504	0.897029		7.0504	0.887787		7.0504	0.894143
7.1004	0.87666		7.1004	0.888493		7.1004	0.887503		7.1003	0.88882		7.1003	0.887172		7.1004	0.889226		7.1004	0.885679		7.1004	0.891831		7.1004	0.886657		7.1004	0.897256		7.1004	0.884594		7.1004	0.907995		7.1004	0.89055		7.1004	0.896076		7.1004	0.885646		7.1004	0.894022
7.1504	0.876063		7.1504	0.889216		7.1504	0.886909		7.1503	0.889062		7.1504	0.891401		7.1504	0.889308		7.1504	0.887361		7.1504	0.895809		7.1504	0.888602		7.1504	0.89815		7.1504	0.886977		7.1504	0.908218		7.1504	0.887691		7.1504	0.898942		7.1504	0.889351		7.1504	0.895254
7.2004	0.877561		7.2004	0.88559		7.2004	0.886848		7.2003	0.889208		7.2004	0.888708		7.2004	0.889294		7.2004	0.885975		7.2004	0.896225		7.2004	0.887102		7.2004	0.89965		7.2004	0.883023		7.2004	0.905785		7.2004	0.886846		7.2004	0.896082		7.2004	0.884051		7.2004	0.896471
7.2504	0.875822		7.2504	0.885769		7.2504	0.885474		7.2504	0.887527		7.2504	0.887664		7.2504	0.888999		7.2504	0.885635		7.2504	0.894423		7.2504	0.886672		7.2504	0.899485		7.2504	0.886239		7.2504	0.904515		7.2504	0.88772		7.2504	0.894371		7.2504	0.884915		7.2504	0.894956
7.3004	0.875745		7.3004	0.887717		7.3004	0.886078		7.3004	0.889313		7.3004	0.888624		7.3004	0.888828		7.3004	0.886976		7.3004	0.89365		7.3004	0.888361		7.3004	0.899122		7.3004	0.88471		7.3004	0.907311		7.3004	0.887263		7.3004	0.895104		7.3004	0.884613		7.3004	0.891978
7.3504	0.87554		7.3504	0.884981		7.3504	0.883105		7.3504	0.888296		7.3504	0.890955		7.3504	0.888678		7.3504	0.887979		7.3504	0.892846		7.3504	0.887625		7.3504	0.898022		7.3504	0.885992		7.3504	0.907453		7.3504	0.888747		7.3504	0.895178		7.3504	0.885275		7.3504	0.89164
7.4004	0.877378		7.4004	0.885463		7.4004	0.887892		7.4004	0.889027		7.4004	0.886319		7.4004	0.891406		7.4004	0.88748		7.4004	0.890431		7.4004	0.889305		7.4004	0.897121		7.4004	0.885019		7.4004	0.905139		7.4004	0.886522		7.4004	0.894867		7.4004	0.884491		7.4004	0.893666
7.4504	0.878383		7.4504	0.88631		7.4504	0.88672		7.4504	0.88778		7.4504	0.884866		7.4504	0.889247		7.4504	0.890492		7.4504	0.890951		7.4505	0.884373		7.4504	0.896246		7.4504	0.887317		7.4504	0.905089		7.4504	0.885741		7.4504	0.894161		7.4504	0.885366		7.4504	0.89207
7.5004	0.872235		7.5004	0.886017		7.5004	0.886797		7.5004	0.887911		7.5004	0.886947		7.5004	0.889395		7.5004	0.88933		7.5004	0.89326		7.5005	0.888974		7.5004	0.895049		7.5004	0.884461		7.5004	0.905318		7.5004	0.885961		7.5004	0.893983		7.5004	0.884224		7.5004	0.891634
7.5504	0.877477		7.5504	0.886631		7.5504	0.887162		7.5504	0.887037		7.5504	0.887358		7.5504	0.889611		7.5504	0.887418		7.5505	0.89184		7.5505	0.886406		7.5504	0.898185		7.5504	0.88572		7.5504	0.906865		7.5504	0.885954		7.5504	0.892806		7.5504	0.885099		7.5504	0.890586
7.6004	0.872252		7.6004	0.884604		7.6004	0.887846		7.6004	0.886268		7.6004	0.887092		7.6004	0.887539		7.6004	0.885518		7.6005	0.893674		7.6005	0.884043		7.6004	0.896436		7.6004	0.884799		7.6004	0.904943		7.6004	0.889341		7.6004	0.893974		7.6004	0.883765		7.6004	0.892259
7.6504	0.875279		7.6504	0.881027		7.6504	0.882984		7.6504	0.887394		7.6504	0.884798		7.6504	0.890409		7.6504	0.886545		7.6505	0.89156		7.6505	0.886263		7.6504	0.894398		7.6504	0.885339		7.6504	0.907809		7.6504	0.886411		7.6504	0.895134		7.6504	0.881135		7.6504	0.893988
7.7004	0.874575		7.7004	0.886099		7.7004	0.88585		7.7004	0.887185		7.7004	0.885977		7.7004	0.888366		7.7004	0.888667		7.7005	0.890844		7.7005	0.883656		7.7004	0.897404		7.7004	0.881366		7.7004	0.904787		7.7004	0.886123		7.7004	0.891616		7.7004	0.885407		7.7004	0.893069
7.7504	0.871752		7.7504	0.883814		7.7504	0.886081		7.7504	0.886246		7.7504	0.889262		7.7504	0.889718		7.7504	0.885047		7.7505	0.891695		7.7505	0.884934		7.7504	0.898746		7.7504	0.882748		7.7504	0.904441		7.7505	0.885774		7.7504	0.893344		7.7504	0.883219		7.7504	0.890579
7.8004	0.875555		7.8004	0.883628		7.8005	0.886148		7.8004	0.886444		7.8004	0.885699		7.8004	0.887658		7.8004	0.886672		7.8005	0.889084		7.8005	0.884834		7.8004	0.89804		7.8004	0.883602		7.8005	0.905464		7.8005	0.885406		7.8004	0.892652		7.8004	0.883131		7.8004	0.891306
7.8505	0.876203		7.8504	0.884814		7.8505	0.883775		7.8504	0.886923		7.8504	0.888444		7.8504	0.885783		7.8504	0.883672		7.8505	0.892125		7.8505	0.883199		7.8504	0.894385		7.8504	0.885827		7.8505	0.903074		7.8505	0.88682		7.8504	0.893552		7.8504	0.881905		7.8504	0.892256
7.9005	0.873698		7.9004	0.883516		7.9005	0.88623		7.9004	0.884606		7.9004	0.885659		7.9004	0.886283		7.9004	0.884693		7.9005	0.892959		7.9005	0.885844		7.9004	0.892516		7.9004	0.884104		7.9005	0.902935		7.9005	0.884815		7.9004	0.88913		7.9004	0.884098		7.9004	0.891269
7.9505	0.873413		7.9505	0.886156		7.9505	0.88626		7.9504	0.885372		7.9504	0.886156		7.9504	0.885575		7.9504	0.882439		7.9505	0.892127		7.9505	0.885104		7.9504	0.89419		7.9504	0.885461		7.9505	0.903045		7.9505	0.885628		7.9504	0.89213		7.9504	0.880667		7.9504	0.8907
8.0005	0.873497		8.0005	0.885799		8.0005	0.886245		8.0004	0.884594		8.0004	0.88568		8.0004	0.88607		8.0004	0.883706		8.0005	0.890972		8.0005	0.882312		8.0004	0.897144		8.0004	0.885986		8.0005	0.903813		8.0005	0.88389		8.0004	0.891999		8.0004	0.882163		8.0004	0.890213
8.0505	0.874035		8.0505	0.88579		8.0505	0.884395		8.0504	0.884048		8.0504	0.885956		8.0504	0.887627		8.0504	0.885552		8.0505	0.891302		8.0505	0.881379		8.0504	0.896301		8.0504	0.881408		8.0505	0.904314		8.0505	0.884532		8.0504	0.890749		8.0504	0.881217		8.0504	0.890607
8.1005	0.876017		8.1005	0.880783		8.1005	0.884355		8.1004	0.885653		8.1004	0.882779		8.1004	0.886441		8.1004	0.882801		8.1005	0.889598		8.1005	0.884255		8.1004	0.895919		8.1004	0.883684		8.1005	0.903771		8.1005	0.88339		8.1004	0.893151		8.1004	0.879801		8.1005	0.892347
8.1505	0.873536		8.1505	0.882886		8.1505	0.884898		8.1504	0.881953		8.1504	0.886631		8.1504	0.886821		8.1504	0.884582		8.1505	0.892814		8.1505	0.884648		8.1504	0.896974		8.1504	0.883168		8.1505	0.905345		8.1505	0.885046		8.1504	0.893238		8.1504	0.883256		8.1505	0.89134
8.2005	0.871284		8.2005	0.883192		8.2005	0.884111		8.2004	0.885515		8.2004	0.887216		8.2004	0.886951		8.2004	0.882966		8.2005	0.890293		8.2005	0.882152		8.2004	0.895075		8.2004	0.881587		8.2005	0.902623		8.2005	0.883294		8.2004	0.893244		8.2004	0.880069		8.2005	0.890458
8.2505	0.87213		8.2505	0.882638		8.2505	0.886187		8.2504	0.886074		8.2504	0.885334		8.2504	0.883344		8.2505	0.882509		8.2505	0.890427		8.2505	0.884467		8.2504	0.893321		8.2504	0.879409		8.2505	0.901657		8.2505	0.882434		8.2504	0.893463		8.2504	0.881872		8.2505	0.892079
8.3005	0.872153		8.3005	0.88474		8.3005	0.880548		8.3004	0.885049		8.3004	0.883677		8.3005	0.885355		8.3005	0.886071		8.3005	0.88924		8.3005	0.884633		8.3004	0.893882		8.3004	0.879778		8.3005	0.902425		8.3005	0.883226		8.3004	0.892005		8.3004	0.880154		8.3005	0.890712
8.3505	0.872703		8.3505	0.882252		8.3505	0.8853		8.3504	0.884509		8.3504	0.885595		8.3505	0.886359		8.3505	0.882679		8.3505	0.888307		8.3505	0.88227		8.3504	0.894737		8.3504	0.878663		8.3505	0.902633		8.3505	0.882198		8.3504	0.895279		8.3504	0.883253		8.3505	0.889839
8.4005	0.872658		8.4005	0.882863		8.4005	0.884616		8.4004	0.883426		8.4004	0.883685		8.4005	0.886411		8.4005	0.8832		8.4005	0.887892		8.4005	0.883563		8.4004	0.892533		8.4004	0.881166		8.4005	0.901331		8.4005	0.882618		8.4004	0.891127		8.4004	0.882608		8.4005	0.889052
8.4505	0.869879		8.4505	0.883034		8.4505	0.880289		8.4504	0.882622		8.4504	0.883177		8.4505	0.886178		8.4505	0.885257		8.4505	0.889078		8.4505	0.88336		8.4504	0.894756		8.4504	0.881847		8.4505	0.904342		8.4505	0.881893		8.4504	0.889446		8.4504	0.88049		8.4505	0.890869
8.5005	0.873523		8.5005	0.881605		8.5005	0.884001		8.5004	0.883288		8.5004	0.885627		8.5005	0.884481		8.5005	0.884418		8.5005	0.888823		8.5005	0.881628		8.5004	0.893662		8.5004	0.878788		8.5005	0.900513		8.5005	0.881419		8.5004	0.891666		8.5004	0.878954		8.5005	0.889032
8.5505	0.872313		8.5505	0.880901		8.5505	0.882385		8.5504	0.881605		8.5504	0.884174		8.5505	0.884519		8.5505	0.881805		8.5505	0.888344		8.5505	0.880892		8.5504	0.892414		8.5505	0.882418		8.5505	0.900571		8.5505	0.881406		8.5504	0.889577		8.5504	0.882429		8.5505	0.889761
8.6005	0.869603		8.6005	0.884547		8.6005	0.882846		8.6004	0.885727		8.6004	0.88594		8.6005	0.8832		8.6005	0.882696		8.6005	0.88972		8.6005	0.882851		8.6005	0.895429		8.6005	0.880834		8.6005	0.900024		8.6005	0.882278		8.6004	0.892074		8.6004	0.880928		8.6005	0.892184
8.6505	0.868578		8.6505	0.881633		8.6505	0.884912		8.6504	0.882089		8.6504	0.883262		8.6505	0.889486		8.6505	0.88409		8.6505	0.889782		8.6505	0.883521		8.6505	0.893578		8.6505	0.880606		8.6505	0.900077		8.6505	0.883214		8.6504	0.892302		8.6504	0.881674		8.6505	0.888486
8.7005	0.868815		8.7005	0.882403		8.7005	0.881732		8.7004	0.882937		8.7004	0.8839		8.7005	0.884097		8.7005	0.884255		8.7005	0.889058		8.7005	0.884742		8.7005	0.892442		8.7005	0.882508		8.7005	0.899775		8.7005	0.881106		8.7004	0.891692		8.7004	0.880874		8.7005	0.889899
8.7505	0.870624		8.7505	0.884616		8.7505	0.882031		8.7504	0.882071		8.7504	0.883174		8.7505	0.883471		8.7505	0.880659		8.7505	0.888747		8.7505	0.881813		8.7505	0.892287		8.7505	0.879251		8.7505	0.901756		8.7505	0.881052		8.7504	0.891202		8.7505	0.88268		8.7505	0.889532
8.8005	0.87263		8.8005	0.880677		8.8005	0.88282		8.8004	0.882683		8.8004	0.884617		8.8005	0.885398		8.8005	0.880842		8.8005	0.889204		8.8005	0.882642		8.8005	0.893146		8.8005	0.880856		8.8005	0.899811		8.8005	0.879974		8.8004	0.890423		8.8005	0.880692		8.8005	0.888246
8.8505	0.870195		8.8505	0.880779		8.8505	0.881253		8.8504	0.880169		8.8504	0.884576		8.8505	0.885961		8.8505	0.881057		8.8505	0.886983		8.8505	0.881487		8.8505	0.890446		8.8505	0.880772		8.8505	0.901284		8.8505	0.882311		8.8505	0.889942		8.8505	0.87888		8.8505	0.887339
8.9005	0.869959		8.9005	0.883004		8.9005	0.880961		8.9004	0.88151		8.9004	0.88598		8.9005	0.887263		8.9005	0.880488		8.9005	0.888957		8.9005	0.881392		8.9005	0.892215		8.9005	0.881976		8.9005	0.90146		8.9005	0.881051		8.9005	0.889978		8.9005	0.879753		8.9005	0.889497
8.9505	0.870169		8.9505	0.880599		8.9505	0.880503		8.9504	0.882217		8.9504	0.884253		8.9505	0.88585		8.9505	0.882701		8.9505	0.889025		8.9505	0.881113		8.9505	0.890968		8.9505	0.879179		8.9505	0.900096		8.9505	0.883633		8.9505	0.890569		8.9505	0.881834		8.9505	0.888415
9.0005	0.867907		9.0005	0.880249		9.0005	0.882138		9.0004	0.882173		9.0005	0.883408		9.0005	0.881291		9.0005	0.882921		9.0005	0.886945		9.0005	0.881607		9.0005	0.893357		9.0005	0.880601		9.0005	0.899785		9.0005	0.879915		9.0005	0.889132		9.0005	0.883297		9.0005	0.886562
9.0505	0.8689		9.0505	0.882562		9.0505	0.882686		9.0505	0.881379		9.0505	0.883292		9.0505	0.883649		9.0505	0.879493		9.0505	0.887639		9.0505	0.880922		9.0505	0.891921		9.0505	0.878316		9.0505	0.899323		9.0505	0.881216		9.0505	0.887836		9.0505	0.880547		9.0505	0.886667
9.1005	0.869527		9.1005	0.881398		9.1005	0.881742		9.1005	0.880457		9.1005	0.88337		9.1005	0.8799		9.1005	0.881409		9.1005	0.888522		9.1005	0.879143		9.1005	0.892875		9.1005	0.87851		9.1005	0.900511		9.1005	0.881452		9.1005	0.887623		9.1005	0.878187		9.1005	0.8882
9.1505	0.870825		9.1505	0.88119		9.1505	0.882587		9.1505	0.879885		9.1505	0.882569		9.1505	0.883307		9.1505	0.882403		9.1505	0.886761		9.1505	0.883552		9.1505	0.893447		9.1505	0.878626		9.1505	0.898736		9.1505	0.881417		9.1505	0.888811		9.1505	0.876518		9.1505	0.886519
9.2005	0.866126		9.2005	0.879067		9.2005	0.881056		9.2005	0.881874		9.2005	0.883105		9.2005	0.881663		9.2005	0.882115		9.2005	0.885969		9.2005	0.881284		9.2005	0.894118		9.2005	0.879458		9.2005	0.899666		9.2005	0.879846		9.2005	0.889513		9.2005	0.879395		9.2005	0.888939
9.2505	0.869557		9.2505	0.880477		9.2505	0.87677		9.2505	0.879476		9.2505	0.885887		9.2505	0.884028		9.2505	0.880253		9.2505	0.884781		9.2505	0.877366		9.2505	0.891825		9.2505	0.878832		9.2505	0.900353		9.2505	0.88048		9.2505	0.889276		9.2505	0.876849		9.2505	0.886605
9.3005	0.869973		9.3005	0.877451		9.3005	0.879548		9.3005	0.879141		9.3005	0.883138		9.3005	0.882272		9.3005	0.880234		9.3005	0.888294		9.3006	0.881242		9.3005	0.892171		9.3005	0.881285		9.3005	0.899476		9.3005	0.882285		9.3005	0.887678		9.3005	0.880674		9.3005	0.888208
9.3505	0.869582		9.3505	0.878805		9.3505	0.879255		9.3505	0.878636		9.3505	0.885603		9.3505	0.883674		9.3505	0.883709		9.3505	0.887076		9.3506	0.879387		9.3505	0.89171		9.3505	0.880863		9.3505	0.901941		9.3505	0.880874		9.3505	0.889712		9.3505	0.878423		9.3505	0.886128
9.4005	0.868038		9.4005	0.878059		9.4005	0.880357		9.4005	0.879245		9.4005	0.883111		9.4005	0.880343		9.4005	0.877949		9.4006	0.885023		9.4006	0.881455		9.4005	0.889251		9.4005	0.878028		9.4005	0.899417		9.4005	0.879477		9.4005	0.888726		9.4005	0.876506		9.4005	0.887296
9.4505	0.869309		9.4505	0.880307		9.4505	0.877015		9.4505	0.883152		9.4505	0.881666		9.4505	0.884659		9.4505	0.880154		9.4506	0.887156		9.4506	0.881001		9.4505	0.893444		9.4505	0.878465		9.4505	0.901135		9.4505	0.880562		9.4505	0.888678		9.4505	0.878737		9.4505	0.887115
9.5005	0.865345		9.5005	0.878423		9.5005	0.880009		9.5005	0.879024		9.5005	0.883002		9.5005	0.882976		9.5005	0.877373		9.5006	0.887369		9.5006	0.879685		9.5005	0.889695		9.5005	0.877632		9.5005	0.898412		9.5005	0.880834		9.5005	0.89034		9.5005	0.878812		9.5005	0.887258
9.5505	0.866713		9.5505	0.878349		9.5505	0.878571		9.5505	0.883661		9.5505	0.881945		9.5505	0.882358		9.5505	0.878887		9.5506	0.890352		9.5506	0.876556		9.5505	0.892326		9.5505	0.877823		9.5505	0.897099		9.5505	0.881061		9.5505	0.889275		9.5505	0.879216		9.5505	0.886096
9.6005	0.870711		9.6005	0.877389		9.6005	0.880352		9.6005	0.88021		9.6005	0.882933		9.6005	0.880774		9.6005	0.876515		9.6006	0.887246		9.6006	0.878832		9.6005	0.89084		9.6005	0.876593		9.6005	0.89737		9.6006	0.878987		9.6005	0.887602		9.6005	0.876732		9.6005	0.88784
9.6505	0.868548		9.6505	0.877428		9.6506	0.876409		9.6505	0.881652		9.6505	0.881192		9.6505	0.886376		9.6505	0.879148		9.6506	0.885171		9.6506	0.879624		9.6505	0.891921		9.6505	0.878242		9.6506	0.897882		9.6506	0.880843		9.6505	0.886696		9.6505	0.882133		9.6505	0.885671
9.7006	0.865465		9.7005	0.880259		9.7006	0.882349		9.7005	0.880315		9.7005	0.881306		9.7005	0.880983		9.7005	0.88175		9.7006	0.888211		9.7006	0.881741		9.7005	0.887897		9.7005	0.878786		9.7006	0.899812		9.7006	0.881048		9.7005	0.887663		9.7005	0.878292		9.7005	0.886767
9.7506	0.868067		9.7506	0.879888		9.7506	0.879252		9.7505	0.880339		9.7505	0.879632		9.7505	0.879531		9.7505	0.879139		9.7506	0.886678		9.7506	0.879667		9.7505	0.888626		9.7505	0.880637		9.7506	0.897368		9.7506	0.878639		9.7505	0.88899		9.7505	0.879124		9.7505	0.885666
9.8006	0.867897		9.8006	0.877551		9.8006	0.87766		9.8005	0.878501		9.8005	0.880481		9.8005	0.881715		9.8005	0.881366		9.8006	0.887401		9.8006	0.879077		9.8005	0.892558		9.8005	0.87929		9.8006	0.901034		9.8006	0.880229		9.8005	0.888207		9.8005	0.874616		9.8005	0.887935
9.8506	0.866695		9.8506	0.87754		9.8506	0.878146		9.8505	0.877541		9.8505	0.879465		9.8505	0.884161		9.8505	0.878109		9.8506	0.885823		9.8506	0.879894		9.8505	0.891991		9.8505	0.87677		9.8506	0.897936		9.8506	0.876513		9.8505	0.889924		9.8505	0.875105		9.8505	0.88578
9.9006	0.865943		9.9006	0.876396		9.9006	0.875827		9.9005	0.878327		9.9005	0.882036		9.9005	0.880531		9.9005	0.879242		9.9006	0.883691		9.9006	0.88179		9.9005	0.888574		9.9005	0.878397		9.9006	0.896389		9.9006	0.87786		9.9005	0.890413		9.9005	0.877996		9.9005	0.884436
9.9506	0.864905		9.9506	0.879532		9.9506	0.878038		9.9505	0.879716		9.9505	0.881784		9.9505	0.88235		9.9505	0.881205		9.9506	0.887952		9.9506	0.882124		9.9505	0.890884		9.9505	0.878226		9.9506	0.897423		9.9506	0.881395		9.9505	0.887038		9.9505	0.878612		9.9506	0.884662
10.0006	0.864699		10.0006	0.876493		10.0006	0.876109		10.0005	0.87887		10.0005	0.881762		10.0005	0.882283		10.0005	0.876751		10.0006	0.884783		10.0006	0.879105		10.0005	0.888233		10.0005	0.878782		10.0006	0.89486		10.0006	0.879074		10.0005	0.884533		10.0005	0.876921		10.0006	0.882949
10.0506	0.866551		10.0506	0.876992		10.0506	0.877741		10.0505	0.878741		10.0505	0.884551		10.0505	0.879632		10.0505	0.875887		10.0506	0.883791		10.0506	0.875954		10.0505	0.890405		10.0505	0.874939		10.0506	0.89834		10.0506	0.880143		10.0505	0.887017		10.0505	0.877538		10.0506	0.889063
10.1006	0.865184		10.1006	0.874237		10.1006	0.877522		10.1005	0.879304		10.1005	0.883435		10.1006	0.880615		10.1006	0.879327		10.1006	0.883411		10.1006	0.878202		10.1005	0.888701		10.1005	0.87489		10.1006	0.89791		10.1006	0.878932		10.1005	0.888797		10.1005	0.875429		10.1006	0.885988
10.1506	0.865856		10.1506	0.876949		10.1506	0.877823		10.1505	0.876956		10.1505	0.878675		10.1506	0.882476		10.1506	0.876804		10.1506	0.885256		10.1506	0.878047		10.1505	0.890337		10.1505	0.875127		10.1506	0.897118		10.1506	0.874748		10.1505	0.889057		10.1505	0.87706		10.1506	0.88495
10.2006	0.866202		10.2006	0.881995		10.2006	0.874774		10.2005	0.879384		10.2005	0.882674		10.2006	0.879751		10.2006	0.878209		10.2006	0.886123		10.2006	0.879692		10.2005	0.888337		10.2005	0.874952		10.2006	0.901079		10.2006	0.877142		10.2005	0.888569		10.2005	0.875999		10.2006	0.887633
10.2506	0.866236		10.2506	0.878933		10.2506	0.878258		10.2505	0.878673		10.2505	0.879992		10.2506	0.882249		10.2506	0.876489		10.2506	0.883441		10.2506	0.880339		10.2505	0.88908		10.2505	0.874076		10.2506	0.898078		10.2506	0.878155		10.2505	0.884823		10.2505	0.875319		10.2506	0.885274
10.3006	0.86426		10.3006	0.878831		10.3006	0.878051		10.3005	0.875105		10.3005	0.878029		10.3006	0.879278		10.3006	0.877919		10.3006	0.88275		10.3006	0.879091		10.3005	0.886738		10.3005	0.877406		10.3006	0.89537		10.3006	0.876518		10.3005	0.88837		10.3005	0.874928		10.3006	0.885844
10.3506	0.866215		10.3506	0.876811		10.3506	0.877123		10.3505	0.877401		10.3505	0.881774		10.3506	0.881325		10.3506	0.87834		10.3506	0.882882		10.3506	0.879787		10.3505	0.8916		10.3506	0.875304		10.3506	0.897699		10.3506	0.879476		10.3505	0.8883		10.3505	0.875794		10.3506	0.886974
10.4006	0.865486		10.4006	0.876995		10.4006	0.876835		10.4005	0.879202		10.4005	0.881499		10.4006	0.881011		10.4006	0.878036		10.4006	0.887066		10.4006	0.879675		10.4006	0.890301		10.4006	0.875111		10.4006	0.897724		10.4006	0.877602		10.4005	0.886223		10.4005	0.874958		10.4006	0.885509
10.4506	0.86426		10.4506	0.87502		10.4506	0.877843		10.4505	0.877507		10.4505	0.87968		10.4506	0.879105		10.4506	0.879915		10.4506	0.882996		10.4506	0.878864		10.4506	0.889399		10.4506	0.874758		10.4506	0.895161		10.4506	0.878485		10.4505	0.884587		10.4505	0.875717		10.4506	0.88237
10.5006	0.863406		10.5006	0.876981		10.5006	0.877226		10.5005	0.876963		10.5005	0.880219		10.5006	0.880645		10.5006	0.87835		10.5006	0.885253		10.5006	0.876536		10.5006	0.888429		10.5006	0.875883		10.5006	0.895589		10.5006	0.877504		10.5005	0.886078		10.5005	0.87662		10.5006	0.884297
10.5506	0.865427		10.5506	0.877053		10.5506	0.875042		10.5505	0.878297		10.5505	0.879812		10.5506	0.882649		10.5506	0.87478		10.5506	0.884051		10.5506	0.87933		10.5506	0.890762		10.5506	0.875969		10.5506	0.895822		10.5506	0.877913		10.5505	0.886311		10.5506	0.877199		10.5506	0.885822
10.6006	0.864735		10.6006	0.87706		10.6006	0.876552		10.6005	0.875432		10.6005	0.880931		10.6006	0.879983		10.6006	0.879845		10.6006	0.885116		10.6006	0.879909		10.6006	0.888322		10.6006	0.876611		10.6006	0.894908		10.6006	0.879456		10.6005	0.886041		10.6006	0.878389		10.6006	0.886136
10.6506	0.866411		10.6506	0.878449		10.6506	0.876067		10.6505	0.878005		10.6505	0.881895		10.6506	0.878219		10.6506	0.875507		10.6506	0.884559		10.6506	0.877856		10.6506	0.88988		10.6506	0.875992		10.6506	0.893577		10.6506	0.876248		10.6505	0.887584		10.6506	0.876284		10.6506	0.88577
10.7006	0.862921		10.7006	0.876099		10.7006	0.87611		10.7005	0.877664		10.7005	0.880532		10.7006	0.881533		10.7006	0.87582		10.7006	0.883691		10.7006	0.877457		10.7006	0.887663		10.7006	0.873672		10.7006	0.897581		10.7006	0.875774		10.7006	0.886301		10.7006	0.875123		10.7006	0.886507
10.7506	0.865274		10.7506	0.873261		10.7506	0.878564		10.7505	0.877339		10.7505	0.879618		10.7506	0.880763		10.7506	0.875325		10.7506	0.881016		10.7506	0.876307		10.7506	0.887692		10.7506	0.875477		10.7506	0.895982		10.7506	0.879011		10.7506	0.886878		10.7506	0.876157		10.7506	0.884971
10.8006	0.864713		10.8006	0.878248		10.8006	0.87753		10.8005	0.874933		10.8006	0.877806		10.8006	0.879896		10.8006	0.877142		10.8006	0.88305		10.8006	0.879798		10.8006	0.891008		10.8006	0.879954		10.8006	0.896603		10.8006	0.876941		10.8006	0.884944		10.8006	0.874915		10.8006	0.88436
10.8506	0.865173		10.8506	0.874529		10.8506	0.88003		10.8505	0.877766		10.8506	0.878617		10.8506	0.877764		10.8506	0.876626		10.8506	0.88311		10.8506	0.877637		10.8506	0.887628		10.8506	0.875042		10.8506	0.894466		10.8506	0.875846		10.8506	0.884065		10.8506	0.875796		10.8506	0.881564
10.9006	0.864448		10.9006	0.876133		10.9006	0.879212		10.9006	0.880109		10.9006	0.88011		10.9006	0.88202		10.9006	0.88144		10.9006	0.881398		10.9006	0.875446		10.9006	0.890085		10.9006	0.874383		10.9006	0.896515		10.9006	0.87272		10.9006	0.886461		10.9006	0.876439		10.9006	0.881414
10.9506	0.862977		10.9506	0.874623		10.9506	0.875976		10.9506	0.878435		10.9506	0.878285		10.9506	0.879669		10.9506	0.876925		10.9506	0.882823		10.9506	0.876987		10.9506	0.889676		10.9506	0.873959		10.9506	0.896462		10.9506	0.876064		10.9506	0.885948		10.9506	0.872539		10.9506	0.88491
11.0006	0.864648		11.0006	0.877012		11.0006	0.874808		11.0006	0.881422		11.0006	0.883701		11.0006	0.879398		11.0006	0.877301		11.0006	0.882268		11.0006	0.875182		11.0006	0.887377		11.0006	0.875212		11.0006	0.896275		11.0006	0.875409		11.0006	0.882481		11.0006	0.874513		11.0006	0.881174
11.0506	0.863952		11.0506	0.877067		11.0506	0.875793		11.0506	0.877908		11.0506	0.880453		11.0506	0.879633		11.0506	0.87737		11.0506	0.88315		11.0506	0.87499		11.0506	0.890216		11.0506	0.872928		11.0506	0.89653		11.0506	0.874607		11.0506	0.88663		11.0506	0.877129		11.0506	0.883593
11.1006	0.863726		11.1006	0.87627		11.1006	0.877836		11.1006	0.87988		11.1006	0.879967		11.1006	0.878792		11.1006	0.875486		11.1006	0.882322		11.1007	0.87431		11.1006	0.89036		11.1006	0.87449		11.1006	0.896631		11.1006	0.876256		11.1006	0.884088		11.1006	0.874985		11.1006	0.886402
11.1506	0.864425		11.1506	0.873746		11.1506	0.877344		11.1506	0.875755		11.1506	0.877937		11.1506	0.877773		11.1506	0.877685		11.1506	0.88189		11.1507	0.877941		11.1506	0.885432		11.1506	0.875802		11.1506	0.896942		11.1506	0.876424		11.1506	0.886094		11.1506	0.87507		11.1506	0.884939
11.2006	0.863696		11.2006	0.874628		11.2006	0.874822		11.2006	0.874678		11.2006	0.877696		11.2006	0.87907		11.2006	0.874011		11.2007	0.879413		11.2007	0.8762		11.2006	0.887909		11.2006	0.875805		11.2006	0.898774		11.2006	0.874332		11.2006	0.886381		11.2006	0.872365		11.2006	0.883161
11.2506	0.86265		11.2506	0.875512		11.2506	0.877006		11.2506	0.878021		11.2506	0.879577		11.2506	0.876946		11.2506	0.875893		11.2507	0.881272		11.2507	0.875838		11.2506	0.888424		11.2506	0.873536		11.2506	0.896128		11.2506	0.873883		11.2506	0.885614		11.2506	0.873989		11.2506	0.884716
11.3006	0.864793		11.3006	0.875539		11.3006	0.873423		11.3006	0.87463		11.3006	0.878721		11.3006	0.875846		11.3006	0.877615		11.3007	0.882879		11.3007	0.87592		11.3006	0.887844		11.3006	0.872567		11.3006	0.892599		11.3006	0.874382		11.3006	0.885305		11.3006	0.872659		11.3006	0.882612
11.3506	0.863752		11.3506	0.876114		11.3506	0.875671		11.3506	0.875884		11.3506	0.878104		11.3506	0.877466		11.3506	0.876093		11.3507	0.881862		11.3507	0.874588		11.3506	0.887607		11.3506	0.873611		11.3506	0.895722		11.3506	0.874351		11.3506	0.883221		11.3506	0.873557		11.3506	0.883196
11.4006	0.862386		11.4006	0.874903		11.4006	0.875691		11.4006	0.876546		11.4006	0.877971		11.4006	0.877713		11.4006	0.876253		11.4007	0.881253		11.4007	0.87886		11.4006	0.888115		11.4006	0.872654		11.4006	0.891554		11.4007	0.874377		11.4006	0.884638		11.4006	0.874701		11.4006	0.884016
11.4506	0.86003		11.4506	0.875172		11.4507	0.874511		11.4506	0.879442		11.4506	0.880386		11.4506	0.878625		11.4506	0.874174		11.4507	0.881593		11.4507	0.876423		11.4506	0.887212		11.4506	0.870816		11.4507	0.896652		11.4507	0.873774		11.4506	0.886303		11.4506	0.873139		11.4506	0.883145
11.5007	0.862542		11.5006	0.876368		11.5007	0.87585		11.5006	0.876281		11.5006	0.879154		11.5006	0.878923		11.5006	0.878039		11.5007	0.882359		11.5007	0.874325		11.5006	0.887413		11.5006	0.871923		11.5007	0.894948		11.5007	0.876398		11.5006	0.885369		11.5006	0.874346		11.5006	0.880064
11.5507	0.863712		11.5506	0.874849		11.5507	0.874903		11.5506	0.878674		11.5506	0.881065		11.5506	0.877288		11.5506	0.875724		11.5507	0.882902		11.5507	0.874936		11.5506	0.88779		11.5506	0.871921		11.5507	0.894427		11.5507	0.874474		11.5506	0.885287		11.5506	0.873129		11.5506	0.881318
11.6007	0.86225		11.6007	0.873675		11.6007	0.875381		11.6006	0.874403		11.6006	0.877676		11.6006	0.879166		11.6006	0.873499		11.6007	0.880554		11.6007	0.877103		11.6006	0.886192		11.6006	0.87515		11.6007	0.892197		11.6007	0.874719		11.6006	0.883853		11.6006	0.874318		11.6006	0.883659
11.6507	0.861421		11.6507	0.875715		11.6507	0.875103		11.6506	0.877433		11.6506	0.87911		11.6506	0.877666		11.6506	0.874373		11.6507	0.879791		11.6507	0.876013		11.6506	0.889107		11.6506	0.871536		11.6507	0.896088		11.6507	0.876564		11.6506	0.883652		11.6506	0.872497		11.6506	0.881419
11.7007	0.861301		11.7007	0.876796		11.7007	0.873285		11.7006	0.878264		11.7006	0.877475		11.7006	0.877839		11.7006	0.873309		11.7007	0.879908		11.7007	0.877224		11.7006	0.888135		11.7006	0.87467		11.7007	0.895305		11.7007	0.874187		11.7006	0.884409		11.7006	0.870916		11.7006	0.884068
11.7507	0.863429		11.7507	0.874665		11.7507	0.874878		11.7506	0.876192		11.7506	0.878513		11.7506	0.878703		11.7506	0.876036		11.7507	0.882105		11.7507	0.873417		11.7506	0.885239		11.7506	0.869382		11.7507	0.89458		11.7507	0.8746		11.7506	0.885827		11.7506	0.87257		11.7507	0.883097
11.8007	0.85978		11.8007	0.873634		11.8007	0.873152		11.8006	0.875818		11.8006	0.87726		11.8006	0.877975		11.8006	0.87307		11.8007	0.880436		11.8007	0.874948		11.8006	0.887926		11.8006	0.872899		11.8007	0.893333		11.8007	0.873624		11.8006	0.885711		11.8006	0.872771		11.8007	0.883022
11.8507	0.860686		11.8507	0.872308		11.8507	0.874805		11.8506	0.87417		11.8506	0.877409		11.8506	0.88062		11.8506	0.877467		11.8507	0.882941		11.8507	0.876851		11.8506	0.885981		11.8506	0.874677		11.8507	0.8952		11.8507	0.873355		11.8506	0.882726		11.8506	0.872739		11.8507	0.884635
11.9007	0.864341		11.9007	0.874031		11.9007	0.873853		11.9006	0.872751		11.9006	0.876458		11.9006	0.879618		11.9006	0.876401		11.9007	0.881849		11.9007	0.875306		11.9006	0.886573		11.9006	0.873455		11.9007	0.897505		11.9007	0.875848		11.9006	0.883814		11.9006	0.873742		11.9007	0.882216
11.9507	0.863328		11.9507	0.872685		11.9507	0.874995		11.9506	0.87534		11.9506	0.878041		11.9507	0.879335		11.9507	0.87553		11.9507	0.881637		11.9507	0.877344		11.9506	0.887196		11.9506	0.876742		11.9507	0.895148		11.9507	0.876404		11.9506	0.88366		11.9506	0.873247		11.9507	0.882096
12.0007	0.862483		12.0007	0.873261		12.0007	0.876328		12.0006	0.873503		12.0006	0.877292		12.0007	0.874779		12.0007	0.874147		12.0007	0.880594		12.0007	0.877992		12.0006	0.883606		12.0006	0.875748		12.0007	0.894046		12.0007	0.874663		12.0006	0.885154		12.0006	0.874655		12.0007	0.883871
12.0507	0.864357		12.0507	0.874759		12.0507	0.874592		12.0506	0.873791		12.0506	0.875932		12.0507	0.879658		12.0507	0.871793		12.0507	0.880364		12.0507	0.874796		12.0506	0.885412		12.0506	0.874818		12.0507	0.891472		12.0507	0.872928		12.0506	0.88622		12.0506	0.874647		12.0507	0.882638
12.1007	0.862607		12.1007	0.874254		12.1007	0.873743		12.1006	0.875		12.1006	0.877741		12.1007	0.879729		12.1007	0.876172		12.1007	0.883479		12.1007	0.872274		12.1006	0.887967		12.1006	0.875957		12.1007	0.894056		12.1007	0.873519		12.1006	0.885633		12.1006	0.87348		12.1007	0.880592
12.1507	0.86133		12.1507	0.874025		12.1507	0.870819		12.1506	0.87525		12.1506	0.876944		12.1507	0.879547		12.1507	0.873197		12.1507	0.882014		12.1507	0.872044		12.1506	0.887396		12.1506	0.873677		12.1507	0.892238		12.1507	0.873504		12.1506	0.88222		12.1506	0.872801		12.1507	0.878103
12.2007	0.860964		12.2007	0.875204		12.2007	0.87398		12.2006	0.873988		12.2006	0.879953		12.2007	0.878293		12.2007	0.875608		12.2007	0.882528		12.2007	0.876359		12.2006	0.886486		12.2007	0.874058		12.2007	0.893352		12.2007	0.871093		12.2006	0.885909		12.2006	0.870232		12.2007	0.883975
12.2507	0.861099		12.2507	0.873639		12.2507	0.872805		12.2506	0.875367		12.2506	0.877445		12.2507	0.877123		12.2507	0.876512		12.2507	0.881722		12.2507	0.872203		12.2507	0.883855		12.2507	0.870953		12.2507	0.894485		12.2507	0.870895		12.2506	0.885178		12.2506	0.872094		12.2507	0.882872
12.3007	0.861871		12.3007	0.872613		12.3007	0.876487		12.3006	0.874105		12.3006	0.878037		12.3007	0.877811		12.3007	0.875986		12.3007	0.880669		12.3007	0.872937		12.3007	0.886303		12.3007	0.870907		12.3007	0.895597		12.3007	0.875728		12.3006	0.883407		12.3006	0.871886		12.3007	0.881735
12.3507	0.863086		12.3507	0.872794		12.3507	0.875739		12.3506	0.876298		12.3506	0.878472		12.3507	0.878314		12.3507	0.875233		12.3507	0.883623		12.3507	0.873326		12.3507	0.886295		12.3507	0.8719		12.3507	0.892653		12.3507	0.872711		12.3506	0.882785		12.3506	0.872765		12.3507	0.882624
12.4007	0.858983		12.4007	0.873254		12.4007	0.872099		12.4006	0.87524		12.4006	0.87483		12.4007	0.878584		12.4007	0.870685		12.4007	0.880036		12.4007	0.875238		12.4007	0.887526		12.4007	0.870367		12.4007	0.894526		12.4007	0.876315		12.4006	0.883599		12.4007	0.870951		12.4007	0.87809
12.4507	0.858868		12.4507	0.868912		12.4507	0.876253		12.4506	0.871826		12.4506	0.875571		12.4507	0.87788		12.4507	0.874837		12.4507	0.879643		12.4507	0.874605		12.4507	0.883943		12.4507	0.870756		12.4507	0.895393		12.4507	0.873109		12.4506	0.88163		12.4507	0.872405		12.4507	0.879727
12.5007	0.859253		12.5007	0.872321		12.5007	0.87487		12.5006	0.874913		12.5006	0.877329		12.5007	0.877123		12.5007	0.872146		12.5007	0.881817		12.5007	0.873032		12.5007	0.886938		12.5007	0.871718		12.5007	0.893567		12.5007	0.873679		12.5007	0.882231		12.5007	0.870048		12.5007	0.883004
12.5507	0.858446		12.5507	0.87174		12.5507	0.873026		12.5506	0.873553		12.5506	0.873986		12.5507	0.875962		12.5507	0.874898		12.5507	0.880872		12.5507	0.873826		12.5507	0.883607		12.5507	0.872179		12.5507	0.894864		12.5507	0.874131		12.5507	0.887094		12.5507	0.871355		12.5507	0.879397
12.6007	0.863179		12.6007	0.873327		12.6007	0.874878		12.6006	0.874638		12.6006	0.87603		12.6007	0.877087		12.6007	0.873319		12.6007	0.88027		12.6007	0.874377		12.6007	0.884878		12.6007	0.870026		12.6007	0.894165		12.6007	0.871455		12.6007	0.880443		12.6007	0.872428		12.6007	0.882618
12.6507	0.86035		12.6507	0.873919		12.6507	0.874844		12.6506	0.875355		12.6507	0.876537		12.6507	0.876268		12.6507	0.872185		12.6507	0.878324		12.6507	0.872793		12.6507	0.884771		12.6507	0.870576		12.6507	0.892047		12.6507	0.872692		12.6507	0.884543		12.6507	0.870558		12.6507	0.883296
12.7007	0.860292		12.7007	0.876286		12.7007	0.87361		12.7007	0.876024		12.7007	0.875598		12.7007	0.876435		12.7007	0.871264		12.7007	0.87944		12.7007	0.871519		12.7007	0.883984		12.7007	0.871445		12.7007	0.89244		12.7007	0.873548		12.7007	0.881862		12.7007	0.873086		12.7007	0.879793
12.7507	0.85871		12.7507	0.872911		12.7507	0.876776		12.7507	0.875763		12.7507	0.874677		12.7507	0.877898		12.7507	0.873386		12.7507	0.878176		12.7507	0.871756		12.7507	0.884773		12.7507	0.87177		12.7507	0.891388		12.7507	0.874141		12.7507	0.880966		12.7507	0.869504		12.7507	0.878362
12.8007	0.859749		12.8007	0.872447		12.8007	0.873277		12.8007	0.872345		12.8007	0.87393		12.8007	0.875974		12.8007	0.875018		12.8007	0.880135		12.8007	0.872009		12.8007	0.885908		12.8007	0.872487		12.8007	0.893471		12.8007	0.876968		12.8007	0.880597		12.8007	0.869961		12.8007	0.880254
12.8507	0.859458		12.8507	0.874192		12.8507	0.874285		12.8507	0.873451		12.8507	0.875658		12.8507	0.873511		12.8507	0.873699		12.8507	0.878388		12.8507	0.873792		12.8507	0.884508		12.8507	0.874508		12.8507	0.895205		12.8507	0.873493		12.8507	0.88347		12.8507	0.871525		12.8507	0.881994
12.9007	0.861142		12.9007	0.872006		12.9007	0.872672		12.9007	0.874171		12.9007	0.876683		12.9007	0.876634		12.9007	0.870506		12.9007	0.880335		12.9007	0.873617		12.9007	0.885079		12.9007	0.869484		12.9007	0.891102		12.9007	0.871912		12.9007	0.883131		12.9007	0.87041		12.9007	0.879408
12.9507	0.86204		12.9507	0.873266		12.9507	0.873009		12.9507	0.868816		12.9507	0.875121		12.9507	0.876488		12.9507	0.871928		12.9507	0.87728		12.9508	0.875399		12.9507	0.88577		12.9507	0.870036		12.9507	0.891039		12.9507	0.872867		12.9507	0.884576		12.9507	0.872179		12.9507	0.881114
13.0007	0.861623		13.0007	0.87127		13.0007	0.872696		13.0007	0.874199		13.0007	0.876214		13.0007	0.873997		13.0007	0.873546		13.0007	0.878124		13.0008	0.871481		13.0007	0.884189		13.0007	0.871015		13.0007	0.893137		13.0007	0.872051		13.0007	0.880658		13.0007	0.870987		13.0007	0.881181
13.0507	0.859007		13.0507	0.872386		13.0507	0.871815		13.0507	0.874869		13.0507	0.877861		13.0507	0.875807		13.0507	0.876894		13.0508	0.87974		13.0508	0.872441		13.0507	0.883886		13.0507	0.87034		13.0507	0.89023		13.0507	0.872073		13.0507	0.88103		13.0507	0.870003		13.0507	0.879972
13.1007	0.862499		13.1007	0.873617		13.1007	0.870146		13.1007	0.87317		13.1007	0.876856		13.1007	0.878309		13.1007	0.872972		13.1008	0.878883		13.1008	0.871057		13.1007	0.885064		13.1007	0.874243		13.1007	0.892348		13.1007	0.871288		13.1007	0.880933		13.1007	0.870531		13.1007	0.878788
13.1507	0.859837		13.1507	0.87249		13.1507	0.873194		13.1507	0.874127		13.1507	0.872093		13.1507	0.87671		13.1507	0.871955		13.1508	0.87996		13.1508	0.871542		13.1507	0.883653		13.1507	0.869448		13.1507	0.895349		13.1507	0.870283		13.1507	0.87867		13.1507	0.872987		13.1507	0.879313
13.2007	0.861928		13.2007	0.874912		13.2007	0.871861		13.2007	0.874062		13.2007	0.875107		13.2007	0.875926		13.2007	0.873057		13.2008	0.878219		13.2008	0.871013		13.2007	0.886518		13.2007	0.870195		13.2007	0.893847		13.2007	0.872253		13.2007	0.88394		13.2007	0.871616		13.2007	0.88127
13.2507	0.858163		13.2507	0.872443		13.2507	0.874867		13.2507	0.874841		13.2507	0.876144		13.2507	0.878502		13.2507	0.873465		13.2508	0.878256		13.2508	0.873149		13.2507	0.886179		13.2507	0.870015		13.2507	0.892267		13.2508	0.869636		13.2507	0.881538		13.2507	0.872465		13.2507	0.88068
13.3007	0.860343		13.3007	0.86849		13.3008	0.873397		13.3007	0.870828		13.3007	0.873553		13.3007	0.874965		13.3007	0.871905		13.3008	0.880027		13.3008	0.871778		13.3007	0.88362		13.3007	0.867048		13.3008	0.892087		13.3008	0.870781		13.3007	0.882505		13.3007	0.870549		13.3007	0.881165
13.3508	0.861811		13.3507	0.871454		13.3508	0.873552		13.3507	0.873967		13.3507	0.876653		13.3507	0.874314		13.3507	0.874044		13.3508	0.881904		13.3508	0.872031		13.3507	0.885246		13.3507	0.870299		13.3508	0.892274		13.3508	0.871282		13.3507	0.882928		13.3507	0.871856		13.3507	0.880839
13.4008	0.858728		13.4008	0.870704		13.4008	0.874635		13.4007	0.87599		13.4007	0.874782		13.4007	0.876075		13.4007	0.872209		13.4008	0.880402		13.4008	0.873614		13.4007	0.884414		13.4007	0.872831		13.4008	0.89103		13.4008	0.871042		13.4007	0.882833		13.4007	0.870075		13.4007	0.879923
13.4508	0.86015		13.4508	0.87352		13.4508	0.872377		13.4507	0.875051		13.4507	0.875146		13.4507	0.878449		13.4507	0.873627		13.4508	0.879161		13.4508	0.873685		13.4507	0.886827		13.4507	0.872514		13.4508	0.891248		13.4508	0.871386		13.4507	0.884232		13.4507	0.870831		13.4507	0.881381
13.5008	0.861919		13.5008	0.874241		13.5008	0.870921		13.5007	0.873348		13.5007	0.87319		13.5007	0.876825		13.5007	0.873258		13.5008	0.880732		13.5008	0.87197		13.5007	0.884492		13.5007	0.869671		13.5008	0.889705		13.5008	0.872908		13.5007	0.880427		13.5007	0.874858		13.5007	0.880533
13.5508	0.857553		13.5508	0.871711		13.5508	0.870977		13.5507	0.874233		13.5507	0.87133		13.5507	0.875462		13.5507	0.87213		13.5508	0.877988		13.5508	0.871288		13.5507	0.882777		13.5507	0.873626		13.5508	0.890434		13.5508	0.873517		13.5507	0.88413		13.5507	0.870012		13.5507	0.880373
13.6008	0.858463		13.6008	0.87643		13.6008	0.873991		13.6007	0.874524		13.6007	0.873283		13.6007	0.876812		13.6007	0.872909		13.6008	0.878451		13.6008	0.871953		13.6007	0.884654		13.6007	0.867437		13.6008	0.891159		13.6008	0.872502		13.6007	0.882517		13.6007	0.871235		13.6008	0.877418
13.6508	0.85839		13.6508	0.870906		13.6508	0.872494		13.6507	0.873284		13.6507	0.873411		13.6507	0.874505		13.6507	0.870036		13.6508	0.877101		13.6508	0.873551		13.6507	0.884657		13.6507	0.868423		13.6508	0.890778		13.6508	0.872602		13.6507	0.881833		13.6507	0.869418		13.6508	0.879515
13.7008	0.85767		13.7008	0.871309		13.7008	0.871475		13.7007	0.873963		13.7007	0.871329		13.7007	0.873814		13.7007	0.873196		13.7008	0.877867		13.7008	0.872407		13.7007	0.882316		13.7007	0.869084		13.7008	0.889131		13.7008	0.87254		13.7007	0.881767		13.7007	0.870391		13.7008	0.87686
13.7508	0.860763		13.7508	0.872633		13.7508	0.872309		13.7507	0.87353		13.7507	0.87428		13.7508	0.877482		13.7508	0.871903		13.7508	0.875935		13.7508	0.870479		13.7507	0.881709		13.7507	0.871654		13.7508	0.889587		13.7508	0.872629		13.7507	0.878502		13.7507	0.870683		13.7508	0.878514
13.8008	0.858757		13.8008	0.874866		13.8008	0.870151		13.8007	0.872918		13.8007	0.876072		13.8008	0.874003		13.8008	0.871311		13.8008	0.876534		13.8008	0.872451		13.8007	0.880573		13.8007	0.871145		13.8008	0.892902		13.8008	0.869085		13.8007	0.878973		13.8007	0.870975		13.8008	0.881341
13.8508	0.85959		13.8508	0.870933		13.8508	0.875222		13.8507	0.872928		13.8507	0.872811		13.8508	0.873731		13.8508	0.874802		13.8508	0.878349		13.8508	0.870294		13.8507	0.883514		13.8507	0.872829		13.8508	0.888556		13.8508	0.871056		13.8507	0.880907		13.8507	0.869998		13.8508	0.879469
13.9008	0.859334		13.9008	0.875183		13.9008	0.870102		13.9007	0.874912		13.9007	0.872449		13.9008	0.873077		13.9008	0.869382		13.9008	0.879092		13.9008	0.870453		13.9007	0.886221		13.9007	0.868982		13.9008	0.889086		13.9008	0.872143		13.9007	0.879667		13.9007	0.870404		13.9008	0.878005
13.9508	0.860619		13.9508	0.870103		13.9508	0.870386		13.9507	0.86941		13.9507	0.873124		13.9508	0.874364		13.9508	0.871698		13.9508	0.877578		13.9508	0.873769		13.9507	0.8838		13.9507	0.871728		13.9508	0.890105		13.9508	0.875086		13.9507	0.881018		13.9507	0.866773		13.9508	0.878319
14.0008	0.859588		14.0008	0.870084		14.0008	0.872941		14.0007	0.874019		14.0007	0.873104		14.0008	0.872882		14.0008	0.870375		14.0008	0.877515		14.0008	0.87264		14.0007	0.883516		14.0008	0.869652		14.0008	0.888493		14.0008	0.872885		14.0007	0.882711		14.0007	0.871062		14.0008	0.877621
14.0508	0.860081		14.0508	0.870793		14.0508	0.87144		14.0507	0.873898		14.0507	0.874254		14.0508	0.87303		14.0508	0.873406		14.0508	0.880488		14.0508	0.872688		14.0507	0.882292		14.0508	0.867829		14.0508	0.890599		14.0508	0.870671		14.0507	0.877537		14.0507	0.871424		14.0508	0.878656
14.1008	0.856726		14.1008	0.872611		14.1008	0.873757		14.1007	0.871473		14.1007	0.871465		14.1008	0.876143		14.1008	0.873118		14.1008	0.877462		14.1008	0.871993		14.1008	0.885523		14.1008	0.866795		14.1008	0.891728		14.1008	0.870705		14.1007	0.88369		14.1007	0.869719		14.1008	0.882344
14.1508	0.859651		14.1508	0.872127		14.1508	0.872675		14.1507	0.873206		14.1507	0.874594		14.1508	0.874545		14.1508	0.869299		14.1508	0.877107		14.1508	0.874672		14.1508	0.882281		14.1508	0.867826		14.1508	0.890716		14.1508	0.871345		14.1507	0.884375		14.1507	0.871806		14.1508	0.875454
14.2008	0.857465		14.2008	0.869567		14.2008	0.872046		14.2007	0.872408		14.2007	0.872351		14.2008	0.875148		14.2008	0.871034		14.2008	0.881028		14.2008	0.872106		14.2008	0.885718		14.2008	0.869131		14.2008	0.890506		14.2008	0.8716		14.2007	0.879665		14.2007	0.869157		14.2008	0.878436
14.2508	0.861321		14.2508	0.873226		14.2508	0.869345		14.2507	0.87396		14.2507	0.871083		14.2508	0.8729		14.2508	0.872852		14.2508	0.879189		14.2508	0.866742		14.2508	0.882714		14.2508	0.871999		14.2508	0.886357		14.2508	0.870416		14.2507	0.882284		14.2508	0.871688		14.2508	0.877421
14.3008	0.857717		14.3008	0.870344		14.3008	0.871601		14.3007	0.871898		14.3007	0.872572		14.3008	0.873426		14.3008	0.870637		14.3008	0.878019		14.3008	0.872301		14.3008	0.884814		14.3008	0.869703		14.3008	0.892075		14.3008	0.873374		14.3007	0.880997		14.3008	0.869854		14.3008	0.877766
14.3508	0.858561		14.3508	0.869772		14.3508	0.872953		14.3507	0.872306		14.3507	0.871803		14.3508	0.875636		14.3508	0.870872		14.3508	0.878578		14.3508	0.87215		14.3508	0.884866		14.3508	0.871162		14.3508	0.891069		14.3508	0.869646		14.3508	0.880085		14.3508	0.869075		14.3508	0.879351
14.4008	0.859354		14.4008	0.869634		14.4008	0.874272		14.4007	0.871953		14.4007	0.872284		14.4008	0.87746		14.4008	0.871238		14.4008	0.879016		14.4008	0.869716		14.4008	0.883005		14.4008	0.865746		14.4008	0.886741		14.4008	0.870416		14.4008	0.880868		14.4008	0.867969		14.4008	0.879639
14.4508	0.858572		14.4508	0.871647		14.4508	0.870727		14.4507	0.871663		14.4508	0.870736		14.4508	0.87217		14.4508	0.872692		14.4508	0.879966		14.4508	0.869638		14.4508	0.883265		14.4508	0.868338		14.4508	0.890352		14.4508	0.869015		14.4508	0.882837		14.4508	0.869284		14.4508	0.878319
14.5008	0.858438		14.5008	0.870621		14.5008	0.870912		14.5007	0.868892		14.5008	0.872072		14.5008	0.873808		14.5008	0.870915		14.5008	0.875251		14.5008	0.872129		14.5008	0.882133		14.5008	0.867762		14.5008	0.88971		14.5008	0.873661		14.5008	0.878696		14.5008	0.868647		14.5008	0.880128
14.5508	0.859193		14.5508	0.868705		14.5508	0.86996		14.5508	0.870685		14.5508	0.875531		14.5508	0.873642		14.5508	0.872494		14.5508	0.880017		14.5508	0.870673		14.5508	0.883985		14.5508	0.869192		14.5508	0.887905		14.5508	0.870847		14.5508	0.881538		14.5508	0.870684		14.5508	0.880091
14.6008	0.85641		14.6008	0.869055		14.6008	0.869112		14.6008	0.87242		14.6008	0.869714		14.6008	0.872321		14.6008	0.870675		14.6008	0.878862		14.6008	0.873364		14.6008	0.884269		14.6008	0.868183		14.6008	0.888995		14.6008	0.8734		14.6008	0.883162		14.6008	0.870824		14.6008	0.879329
14.6508	0.857314		14.6508	0.869191		14.6508	0.871453		14.6508	0.873871		14.6508	0.870271		14.6508	0.873373		14.6508	0.871335		14.6508	0.878411		14.6508	0.870276		14.6508	0.883341		14.6508	0.870583		14.6508	0.888496		14.6508	0.870155		14.6508	0.881921		14.6508	0.869743		14.6508	0.879061
14.7008	0.855196		14.7008	0.869236		14.7008	0.871577		14.7008	0.874621		14.7008	0.86869		14.7008	0.874143		14.7008	0.872325		14.7008	0.87944		14.7008	0.869817		14.7008	0.884211		14.7008	0.869678		14.7008	0.886273		14.7008	0.869561		14.7008	0.879714		14.7008	0.86703		14.7008	0.879819
14.7508	0.858417		14.7508	0.871806		14.7508	0.869121		14.7508	0.870116		14.7508	0.873763		14.7508	0.873607		14.7508	0.870271		14.7508	0.87656		14.7509	0.873516		14.7508	0.884137		14.7508	0.87009		14.7508	0.888353		14.7508	0.871462		14.7508	0.882662		14.7508	0.868088		14.7508	0.87898
14.8008	0.858068		14.8008	0.867132		14.8008	0.871424		14.8008	0.874108		14.8008	0.871709		14.8008	0.873439		14.8008	0.871412		14.8008	0.876765		14.8009	0.870483		14.8008	0.885229		14.8008	0.870553		14.8008	0.888643		14.8008	0.869028		14.8008	0.877799		14.8008	0.869415		14.8008	0.877895
14.8508	0.858181		14.8508	0.87049		14.8508	0.868781		14.8508	0.873476		14.8508	0.87183		14.8508	0.871502		14.8508	0.872148		14.8509	0.878457		14.8509	0.872252		14.8508	0.880975		14.8508	0.866669		14.8508	0.888911		14.8508	0.873856		14.8508	0.882437		14.8508	0.869274		14.8508	0.877983
14.9008	0.858272		14.9008	0.872026		14.9008	0.8714		14.9008	0.872916		14.9008	0.873345		14.9008	0.87435		14.9008	0.871997		14.9009	0.878165		14.9009	0.872356		14.9008	0.882751		14.9008	0.868232		14.9008	0.891628		14.9008	0.869762		14.9008	0.883122		14.9008	0.869408		14.9008	0.874948
14.9508	0.857431		14.9508	0.866798		14.9508	0.86944		14.9508	0.871433		14.9508	0.872262		14.9508	0.872804		14.9508	0.872887		14.9509	0.878269		14.9509	0.871773		14.9508	0.884169		14.9508	0.869148		14.9508	0.888201		14.9508	0.86999		14.9508	0.879669		14.9508	0.871271		14.9508	0.878433
15.0008	0.857738		15.0008	0.870097		15.0008	0.871531		15.0008	0.871442		15.0008	0.871629		15.0008	0.874174		15.0008	0.869392		15.0009	0.878212		15.0009	0.871035		15.0008	0.883313		15.0008	0.868178		15.0008	0.886957		15.0008	0.867888		15.0008	0.880768		15.0008	0.867655		15.0008	0.878761
15.0508	0.854666		15.0508	0.866581		15.0508	0.869465		15.0508	0.871876		15.0508	0.869727		15.0508	0.873194		15.0508	0.870952		15.0509	0.876376		15.0509	0.869766		15.0508	0.884761		15.0508	0.868023		15.0508	0.890892		15.0509	0.869575		15.0508	0.881737		15.0508	0.86959		15.0508	0.877293
15.1008	0.857041		15.1008	0.8694		15.1009	0.869175		15.1008	0.872409		15.1008	0.870291		15.1008	0.87356		15.1008	0.870054		15.1009	0.876321		15.1009	0.869384		15.1008	0.87952		15.1008	0.86908		15.1009	0.887964		15.1009	0.870427		15.1008	0.879715		15.1008	0.869085		15.1008	0.875161
15.1509	0.85716		15.1508	0.869305		15.1509	0.871846		15.1508	0.872381		15.1508	0.872071		15.1508	0.876497		15.1508	0.869246		15.1509	0.879195		15.1509	0.873697		15.1508	0.883958		15.1508	0.868061		15.1509	0.88937		15.1509	0.871621		15.1508	0.88029		15.1508	0.866806		15.1508	0.875823
15.2009	0.856213		15.2008	0.86958		15.2009	0.870247		15.2008	0.871781		15.2008	0.87213		15.2008	0.874865		15.2008	0.870142		15.2009	0.879495		15.2009	0.868327		15.2008	0.883432		15.2008	0.868205		15.2009	0.889231		15.2009	0.87283		15.2008	0.879502		15.2008	0.871799		15.2008	0.878676
15.2509	0.854571		15.2509	0.868405		15.2509	0.87048		15.2508	0.872774		15.2508	0.871346		15.2508	0.87432		15.2508	0.869194		15.2509	0.877302		15.2509	0.86976		15.2508	0.879446		15.2508	0.868973		15.2509	0.88684		15.2509	0.869181		15.2508	0.881939		15.2508	0.869768		15.2508	0.877204
15.3009	0.857451		15.3009	0.870101		15.3009	0.873661		15.3008	0.871462		15.3008	0.867647		15.3008	0.876314		15.3008	0.871238		15.3009	0.872833		15.3009	0.869357		15.3008	0.88568		15.3008	0.866853		15.3009	0.885249		15.3009	0.868019		15.3008	0.880776		15.3008	0.870956		15.3008	0.876809
15.3509	0.85415		15.3509	0.869916		15.3509	0.868563		15.3508	0.871322		15.3508	0.867469		15.3508	0.873693		15.3508	0.871489		15.3509	0.881029		15.3509	0.871299		15.3508	0.882729		15.3508	0.867893		15.3509	0.888065		15.3509	0.869334		15.3508	0.881566		15.3508	0.867387		15.3508	0.874202
15.4009	0.85721		15.4009	0.871136		15.4009	0.870099		15.4008	0.871879		15.4008	0.87084		15.4008	0.870609		15.4008	0.870643		15.4009	0.875579		15.4009	0.871998		15.4008	0.883919		15.4008	0.87021		15.4009	0.887668		15.4009	0.86636		15.4008	0.880842		15.4008	0.869538		15.4009	0.877803
15.4509	0.858561		15.4509	0.867162		15.4509	0.872977		15.4508	0.871652		15.4508	0.869031		15.4508	0.872564		15.4508	0.869483		15.4509	0.876721		15.4509	0.869107		15.4508	0.881941		15.4508	0.869222		15.4509	0.887258		15.4509	0.87066		15.4508	0.878482		15.4508	0.871239		15.4509	0.877255
15.5009	0.855535		15.5009	0.870382		15.5009	0.866448		15.5008	0.871716		15.5008	0.868318		15.5008	0.873854		15.5008	0.871804		15.5009	0.876573		15.5009	0.870037		15.5008	0.88194		15.5008	0.871137		15.5009	0.886957		15.5009	0.869114		15.5008	0.88037		15.5008	0.86914		15.5009	0.877029
15.5509	0.857496		15.5509	0.870418		15.5509	0.871189		15.5508	0.872301		15.5508	0.87223		15.5508	0.873192		15.5508	0.867052		15.5509	0.876086		15.5509	0.867573		15.5508	0.882073		15.5508	0.870902		15.5509	0.889048		15.5509	0.869054		15.5508	0.88071		15.5508	0.866712		15.5509	0.874348
15.6009	0.85587		15.6009	0.869846		15.6009	0.870757		15.6008	0.871187		15.6008	0.870717		15.6009	0.872293		15.6009	0.870774		15.6009	0.877475		15.6009	0.870483		15.6008	0.882943		15.6008	0.869686		15.6009	0.889555		15.6009	0.868413		15.6008	0.881235		15.6008	0.868635		15.6009	0.878705
15.6509	0.855778		15.6509	0.870623		15.6509	0.871458		15.6508	0.871121		15.6508	0.867736		15.6509	0.872012		15.6509	0.871373		15.6509	0.874753		15.6509	0.868977		15.6508	0.882682		15.6508	0.866602		15.6509	0.889112		15.6509	0.869559		15.6508	0.88249		15.6508	0.868577		15.6509	0.877215
15.7009	0.856516		15.7009	0.869917		15.7009	0.869996		15.7008	0.87275		15.7008	0.870668		15.7009	0.872941		15.7009	0.866878		15.7009	0.877099		15.7009	0.868205		15.7008	0.881011		15.7008	0.869352		15.7009	0.887551		15.7009	0.867974		15.7008	0.878202		15.7008	0.866601		15.7009	0.874802
15.7509	0.856558		15.7509	0.868236		15.7509	0.870227		15.7508	0.87261		15.7508	0.869781		15.7509	0.874926		15.7509	0.867505		15.7509	0.878981		15.7509	0.869283		15.7508	0.882888		15.7508	0.865814		15.7509	0.887711		15.7509	0.868591		15.7508	0.88164		15.7508	0.865354		15.7509	0.876255
15.8009	0.858917		15.8009	0.869354		15.8009	0.870346		15.8008	0.872935		15.8008	0.869849		15.8009	0.871701		15.8009	0.869111		15.8009	0.877014		15.8009	0.871199		15.8008	0.884208		15.8008	0.86624		15.8009	0.887246		15.8009	0.867292		15.8008	0.87846		15.8008	0.867691		15.8009	0.876866
15.8509	0.858021		15.8509	0.868451		15.8509	0.86888		15.8508	0.872611		15.8508	0.871396		15.8509	0.872175		15.8509	0.868505		15.8509	0.87896		15.8509	0.869024		15.8508	0.883382		15.8509	0.867461		15.8509	0.887394		15.8509	0.869564		15.8508	0.880757		15.8508	0.868148		15.8509	0.877306
15.9009	0.854414		15.9009	0.869085		15.9009	0.86785		15.9008	0.871012		15.9008	0.868801		15.9009	0.870858		15.9009	0.864325		15.9009	0.877566		15.9009	0.870881		15.9009	0.883053		15.9009	0.866374		15.9009	0.888412		15.9009	0.870724		15.9008	0.879315		15.9008	0.868182		15.9009	0.877784
15.9509	0.856697		15.9509	0.87042		15.9509	0.86952		15.9508	0.868944		15.9508	0.870354		15.9509	0.871617		15.9509	0.868257		15.9509	0.874385		15.9509	0.867653		15.9509	0.882202		15.9509	0.864494		15.9509	0.888187		15.9509	0.870357		15.9508	0.879192		15.9508	0.866843		15.9509	0.876979
16.0009	0.858223		16.0009	0.86894		16.0009	0.867729		16.0008	0.868141		16.0008	0.870192		16.0009	0.873522		16.0009	0.866061		16.0009	0.876572		16.0009	0.868866		16.0009	0.877206		16.0009	0.869744		16.0009	0.886319		16.0009	0.870218		16.0008	0.878828		16.0008	0.870978		16.0009	0.877384
16.0509	0.85731		16.0509	0.867388		16.0509	0.867839		16.0508	0.870945		16.0508	0.868774		16.0509	0.873685		16.0509	0.869909		16.0509	0.878781		16.0509	0.872357		16.0509	0.883668		16.0509	0.866746		16.0509	0.88442		16.0509	0.869322		16.0508	0.881732		16.0509	0.870293		16.0509	0.877708
16.1009	0.85664		16.1009	0.86959		16.1009	0.87094		16.1008	0.871666		16.1008	0.86798		16.1009	0.872556		16.1009	0.872426		16.1009	0.876249		16.1009	0.866525		16.1009	0.881723		16.1009	0.866898		16.1009	0.886339		16.1009	0.869482		16.1008	0.879096		16.1009	0.868015		16.1009	0.876961
16.1509	0.854352		16.1509	0.867457		16.1509	0.870997		16.1508	0.868413		16.1508	0.869017		16.1509	0.875804		16.1509	0.867481		16.1509	0.87929		16.1509	0.868559		16.1509	0.882127		16.1509	0.866606		16.1509	0.88801		16.1509	0.867422		16.1509	0.8785		16.1509	0.86803		16.1509	0.87808
16.2009	0.854454		16.2009	0.868722		16.2009	0.869513		16.2008	0.868734		16.2008	0.868221		16.2009	0.875825		16.2009	0.870221		16.2009	0.877056		16.2009	0.867465		16.2009	0.880089		16.2009	0.866619		16.2009	0.88809		16.2009	0.870403		16.2009	0.879695		16.2009	0.868546		16.2009	0.877703
16.2509	0.854578		16.2509	0.869266		16.2509	0.867035		16.2508	0.872921		16.2508	0.869186		16.2509	0.87267		16.2509	0.871471		16.2509	0.876199		16.2509	0.867464		16.2509	0.881579		16.2509	0.868676		16.2509	0.889666		16.2509	0.868731		16.2509	0.880538		16.2509	0.866064		16.2509	0.879191
16.3009	0.854581		16.3009	0.867487		16.3009	0.868152		16.3008	0.872585		16.3009	0.871239		16.3009	0.874477		16.3009	0.86981		16.3009	0.876311		16.3009	0.868975		16.3009	0.881354		16.3009	0.869847		16.3009	0.885274		16.3009	0.869343		16.3009	0.87814		16.3009	0.867117		16.3009	0.875166
16.3509	0.855064		16.3509	0.866556		16.3509	0.867384		16.3509	0.871931		16.3509	0.870058		16.3509	0.871474		16.3509	0.870026		16.3509	0.875937		16.3509	0.869333		16.3509	0.879135		16.3509	0.868415		16.3509	0.886191		16.3509	0.868138		16.3509	0.879994		16.3509	0.867529		16.3509	0.875709
16.4009	0.857467		16.4009	0.870253		16.4009	0.868051		16.4009	0.870931		16.4009	0.867713		16.4009	0.871682		16.4009	0.869138		16.4009	0.874815		16.4009	0.871466		16.4009	0.880839		16.4009	0.869502		16.4009	0.887071		16.4009	0.871139		16.4009	0.879577		16.4009	0.868135		16.4009	0.877704
16.4509	0.855589		16.4509	0.866038		16.4509	0.868218		16.4509	0.868911		16.4509	0.870638		16.4509	0.870288		16.4509	0.870167		16.4509	0.879553		16.4509	0.866558		16.4509	0.87799		16.4509	0.866664		16.4509	0.882802		16.4509	0.868217		16.4509	0.877531		16.4509	0.867837		16.4509	0.87559
16.5009	0.853837		16.5009	0.868042		16.5009	0.868308		16.5009	0.8691		16.5009	0.867234		16.5009	0.870829		16.5009	0.868237		16.5009	0.878261		16.5009	0.868664		16.5009	0.88128		16.5009	0.866788		16.5009	0.887556		16.5009	0.869434		16.5009	0.879058		16.5009	0.869154		16.5009	0.875905
16.5509	0.85528		16.5509	0.86594		16.5509	0.866416		16.5509	0.870761		16.5509	0.866784		16.5509	0.871588		16.5509	0.869403		16.5509	0.878406		16.5509	0.870106		16.5509	0.880911		16.5509	0.867913		16.5509	0.882814		16.5509	0.871705		16.5509	0.879188		16.5509	0.867876		16.5509	0.877394
16.6009	0.856783		16.6009	0.869512		16.6009	0.870074		16.6009	0.868882		16.6009	0.86883		16.6009	0.870457		16.6009	0.86704		16.6009	0.873563		16.601	0.868313		16.6009	0.878682		16.6009	0.86571		16.6009	0.886747		16.6009	0.869931		16.6009	0.878919		16.6009	0.867204		16.6009	0.877747
16.6509	0.857248		16.6509	0.867103		16.6509	0.867794		16.6509	0.871509		16.6509	0.868558		16.6509	0.872286		16.6509	0.868903		16.6509	0.872625		16.651	0.868902		16.6509	0.883944		16.6509	0.871562		16.6509	0.886225		16.6509	0.868191		16.6509	0.881117		16.6509	0.866426		16.6509	0.87501
16.7009	0.855816		16.7009	0.870501		16.7009	0.867895		16.7009	0.868083		16.7009	0.868492		16.7009	0.872724		16.7009	0.867494		16.701	0.875079		16.701	0.868717		16.7009	0.882877		16.7009	0.86794		16.7009	0.885083		16.7009	0.866612		16.7009	0.880938		16.7009	0.866857		16.7009	0.877392
16.7509	0.853971		16.7509	0.867436		16.7509	0.87029		16.7509	0.869846		16.7509	0.867289		16.7509	0.870408		16.7509	0.863428		16.751	0.877328		16.751	0.869072		16.7509	0.882615		16.7509	0.867457		16.7509	0.883768		16.7509	0.868888		16.7509	0.878555		16.7509	0.867143		16.7509	0.876117
16.8009	0.856625		16.8009	0.868296		16.8009	0.868095		16.8009	0.870437		16.8009	0.867761		16.8009	0.873122		16.8009	0.868994		16.801	0.877262		16.801	0.869601		16.8009	0.880572		16.8009	0.869396		16.8009	0.888672		16.8009	0.866477		16.8009	0.878992		16.8009	0.86543		16.8009	0.874466
16.8509	0.856779		16.8509	0.868407		16.8509	0.87144		16.8509	0.869979		16.8509	0.868009		16.8509	0.874421		16.8509	0.869358		16.851	0.876725		16.851	0.868622		16.8509	0.879186		16.8509	0.865718		16.8509	0.885909		16.8509	0.868251		16.8509	0.878507		16.8509	0.867849		16.8509	0.874514
16.9009	0.853667		16.9009	0.867022		16.9009	0.868421		16.9009	0.869579		16.9009	0.869973		16.9009	0.873443		16.9009	0.86894		16.901	0.872248		16.901	0.867001		16.9009	0.879691		16.9009	0.869125		16.9009	0.886268		16.901	0.867087		16.9009	0.878782		16.9009	0.866587		16.9009	0.876999
16.9509	0.854832		16.9509	0.866879		16.951	0.869036		16.9509	0.86918		16.9509	0.865926		16.9509	0.870664		16.9509	0.8704		16.951	0.876191		16.951	0.86849		16.9509	0.884779		16.9509	0.867333		16.951	0.88875		16.951	0.869733		16.9509	0.878864		16.9509	0.868201		16.9509	0.877157
17.001	0.852835		17.0009	0.865183		17.001	0.869894		17.0009	0.869936		17.0009	0.867844		17.0009	0.87295		17.0009	0.866307		17.001	0.88019		17.001	0.870354		17.0009	0.878661		17.0009	0.867859		17.001	0.888723		17.001	0.868883		17.0009	0.879007		17.0009	0.869556		17.0009	0.877032
17.051	0.854562		17.051	0.866601		17.051	0.867675		17.0509	0.870682		17.0509	0.867271		17.0509	0.873922		17.0509	0.867893		17.051	0.877128		17.051	0.868415		17.0509	0.881865		17.0509	0.869194		17.051	0.884101		17.051	0.86735		17.0509	0.880464		17.0509	0.867421		17.0509	0.87436
17.101	0.85241		17.101	0.867728		17.101	0.870783		17.1009	0.870632		17.1009	0.871089		17.1009	0.874097		17.1009	0.866565		17.101	0.874529		17.101	0.86946		17.1009	0.881337		17.1009	0.866698		17.101	0.885972		17.101	0.868314		17.1009	0.878273		17.1009	0.866918		17.1009	0.876811
17.151	0.854177		17.151	0.86875		17.151	0.868844		17.1509	0.870753		17.1509	0.866746		17.1509	0.87119		17.1509	0.868259		17.151	0.875328		17.151	0.86563		17.1509	0.881193		17.1509	0.868047		17.151	0.886005		17.151	0.869674		17.1509	0.879967		17.1509	0.867882		17.1509	0.876947
17.201	0.854538		17.201	0.866981		17.201	0.868983		17.2009	0.866394		17.2009	0.868854		17.2009	0.871832		17.2009	0.867355		17.201	0.877651		17.201	0.866273		17.2009	0.881756		17.2009	0.866786		17.201	0.88413		17.201	0.868922		17.2009	0.878287		17.2009	0.865675		17.2009	0.875732
17.251	0.854588		17.251	0.867493		17.251	0.871838		17.2509	0.870251		17.2509	0.866075		17.2509	0.873588		17.2509	0.867934		17.251	0.87138		17.251	0.868075		17.2509	0.87983		17.2509	0.868471		17.251	0.885476		17.251	0.867952		17.2509	0.878237		17.2509	0.867527		17.251	0.873545
17.301	0.852188		17.301	0.867802		17.301	0.86917		17.3009	0.872396		17.3009	0.867247		17.3009	0.873074		17.3009	0.867626		17.301	0.876646		17.301	0.868152		17.3009	0.881392		17.3009	0.866043		17.301	0.887408		17.301	0.868742		17.3009	0.876715		17.3009	0.86738		17.301	0.878039
17.351	0.856656		17.351	0.870417		17.351	0.867139		17.3509	0.870991		17.3509	0.868541		17.3509	0.871929		17.3509	0.865357		17.351	0.875397		17.351	0.867024		17.3509	0.883336		17.3509	0.867905		17.351	0.887556		17.351	0.870345		17.3509	0.878538		17.3509	0.867175		17.351	0.875932
17.401	0.856622		17.401	0.865635		17.401	0.869327		17.4009	0.869665		17.4009	0.869101		17.401	0.870859		17.401	0.865301		17.401	0.878392		17.401	0.863182		17.4009	0.878969		17.4009	0.86745		17.401	0.887007		17.401	0.866931		17.4009	0.877655		17.4009	0.868386		17.401	0.874328
17.451	0.855304		17.451	0.869658		17.451	0.86707		17.4509	0.869189		17.4509	0.866815		17.451	0.875201		17.451	0.866534		17.451	0.873406		17.451	0.868608		17.4509	0.879142		17.4509	0.865311		17.451	0.886675		17.451	0.870654		17.4509	0.878928		17.4509	0.866916		17.451	0.875587
17.501	0.855199		17.501	0.867304		17.501	0.867756		17.5009	0.868727		17.5009	0.866984		17.501	0.873091		17.501	0.868246		17.501	0.874716		17.501	0.869561		17.5009	0.876722		17.5009	0.868725		17.501	0.887932		17.501	0.867684		17.5009	0.878973		17.5009	0.866262		17.501	0.878254
17.551	0.855071		17.551	0.869275		17.551	0.86833		17.5509	0.870031		17.5509	0.867516		17.551	0.869881		17.551	0.866578		17.551	0.878846		17.551	0.867362		17.5509	0.881664		17.5509	0.866812		17.551	0.885506		17.551	0.869354		17.5509	0.879718		17.5509	0.866672		17.551	0.876147
17.601	0.855144		17.601	0.867954		17.601	0.870889		17.6009	0.867641		17.6009	0.86539		17.601	0.873087		17.601	0.869867		17.601	0.877888		17.601	0.868392		17.6009	0.879153		17.6009	0.867976		17.601	0.882651		17.601	0.868433		17.6009	0.878004		17.6009	0.864532		17.601	0.874594
17.651	0.853458		17.651	0.867076		17.651	0.86747		17.6509	0.866786		17.6509	0.868138		17.651	0.872476		17.651	0.870843		17.651	0.875803		17.651	0.868259		17.6509	0.879652		17.651	0.867592		17.651	0.884638		17.651	0.867647		17.6509	0.878177		17.6509	0.864929		17.651	0.875362
17.701	0.85381		17.701	0.86788		17.701	0.868317		17.7009	0.868596		17.7009	0.868083		17.701	0.874454		17.701	0.865156		17.701	0.875722		17.701	0.866192		17.701	0.882462		17.701	0.868152		17.701	0.885272		17.701	0.867624		17.7009	0.877658		17.7009	0.867314		17.701	0.875976
17.751	0.860171		17.751	0.867654		17.751	0.868294		17.7509	0.870072		17.7509	0.866219		17.751	0.872556		17.751	0.867031		17.751	0.875355		17.751	0.866853		17.751	0.881487		17.751	0.864922		17.751	0.886155		17.751	0.870191		17.7509	0.877974		17.7509	0.86745		17.751	0.87536
17.801	0.855595		17.801	0.867617		17.801	0.868906		17.8009	0.866148		17.8009	0.866589		17.801	0.872127		17.801	0.867422		17.801	0.875546		17.801	0.866834		17.801	0.878277		17.801	0.868299		17.801	0.885571		17.801	0.866837		17.8009	0.878115		17.8009	0.868427		17.801	0.875569
17.851	0.856811		17.851	0.866345		17.851	0.866459		17.8509	0.871363		17.8509	0.86785		17.851	0.870795		17.851	0.867046		17.851	0.877398		17.851	0.864634		17.851	0.879506		17.851	0.866165		17.851	0.885237		17.851	0.868058		17.8509	0.877674		17.8509	0.866351		17.851	0.878055
17.901	0.853216		17.901	0.865861		17.901	0.866854		17.9009	0.868991		17.9009	0.867943		17.901	0.871512		17.901	0.869343		17.901	0.87497		17.901	0.868308		17.901	0.880219		17.901	0.865158		17.901	0.886912		17.901	0.868344		17.9009	0.877914		17.901	0.86761		17.901	0.877411
17.951	0.853663		17.951	0.868142		17.951	0.868698		17.9509	0.868645		17.9509	0.867644		17.951	0.871796		17.951	0.867969		17.951	0.876046		17.951	0.868213		17.951	0.881925		17.951	0.865279		17.951	0.887944		17.951	0.86624		17.9509	0.877415		17.951	0.870054		17.951	0.874276
18.001	0.854758		18.001	0.868836		18.001	0.8681		18.0009	0.86744		18.0009	0.866419		18.001	0.873587		18.001	0.865929		18.001	0.873323		18.001	0.869335		18.001	0.87958		18.001	0.86837		18.001	0.886719		18.001	0.867664		18.001	0.878588		18.001	0.868235		18.001	0.875197
18.051	0.855816		18.051	0.866296		18.051	0.867912		18.0509	0.86646		18.0509	0.862589		18.051	0.870439		18.051	0.865507		18.051	0.874211		18.051	0.869734		18.051	0.879504		18.051	0.866916		18.051	0.882543		18.051	0.8672		18.051	0.876969		18.051	0.865952		18.051	0.876654
18.101	0.854864		18.101	0.867665		18.101	0.86606		18.1009	0.869515		18.101	0.869244		18.101	0.873788		18.101	0.867376		18.101	0.874048		18.101	0.867217		18.101	0.880977		18.101	0.865795		18.101	0.884236		18.101	0.86819		18.101	0.879138		18.101	0.865001		18.101	0.873659
18.151	0.854822		18.151	0.868192		18.151	0.869936		18.1509	0.865721		18.151	0.866387		18.151	0.871065		18.151	0.868515		18.151	0.876952		18.151	0.867424		18.151	0.881213		18.151	0.86877		18.151	0.883969		18.151	0.867757		18.151	0.878625		18.151	0.864992		18.151	0.875996
18.201	0.853903		18.201	0.867522		18.201	0.870522		18.201	0.870569		18.201	0.867847		18.201	0.869313		18.201	0.866514		18.201	0.876788		18.201	0.866882		18.201	0.880669		18.201	0.866399		18.201	0.884858		18.201	0.867847		18.201	0.87934		18.201	0.867304		18.201	0.875094
18.251	0.856336		18.251	0.869346		18.251	0.867515		18.251	0.869184		18.251	0.866192		18.251	0.871141		18.251	0.867481		18.251	0.876772		18.251	0.868889		18.251	0.881153		18.251	0.864991		18.251	0.88636		18.251	0.867336		18.251	0.878706		18.251	0.867425		18.251	0.873677
18.301	0.853769		18.301	0.868713		18.301	0.865901		18.301	0.870619		18.301	0.866357		18.301	0.87115		18.301	0.868062		18.301	0.876119		18.301	0.868472		18.301	0.880975		18.301	0.86498		18.301	0.888704		18.301	0.867292		18.301	0.877381		18.301	0.868129		18.301	0.876851
18.351	0.852811		18.351	0.865542		18.351	0.867038		18.351	0.869918		18.351	0.868293		18.351	0.871088		18.351	0.866959		18.351	0.87479		18.351	0.866464		18.351	0.881993		18.351	0.866105		18.351	0.883112		18.351	0.866005		18.351	0.878469		18.351	0.868892		18.351	0.875866
18.401	0.854511		18.401	0.866174		18.401	0.865854		18.401	0.867963		18.401	0.864885		18.401	0.869991		18.401	0.866166		18.401	0.875205		18.4011	0.866283		18.401	0.879776		18.401	0.868223		18.401	0.88487		18.401	0.866385		18.401	0.877874		18.401	0.865789		18.401	0.876319
18.451	0.852297		18.451	0.86686		18.451	0.868711		18.451	0.86906		18.451	0.865793		18.451	0.873286		18.451	0.870119		18.451	0.875757		18.4511	0.864852		18.451	0.880104		18.451	0.86568		18.451	0.888908		18.451	0.870515		18.451	0.877674		18.451	0.86553		18.451	0.877109
18.501	0.853833		18.501	0.868524		18.501	0.868364		18.501	0.869964		18.501	0.867296		18.501	0.869646		18.501	0.868633		18.5011	0.874677		18.5011	0.867614		18.501	0.881349		18.501	0.867527		18.501	0.882374		18.501	0.866767		18.501	0.878809		18.501	0.866012		18.501	0.875505
18.551	0.853729		18.551	0.870105		18.551	0.867042		18.551	0.870507		18.551	0.86626		18.551	0.870663		18.551	0.868447		18.5511	0.874376		18.5511	0.867429		18.551	0.879787		18.551	0.86802		18.551	0.884039		18.551	0.865872		18.551	0.878075		18.551	0.863761		18.551	0.87667
18.601	0.853089		18.601	0.864682		18.601	0.867151		18.601	0.870361		18.601	0.868684		18.601	0.874083		18.601	0.866982		18.6011	0.876556		18.6011	0.867239		18.601	0.876386		18.601	0.867204		18.601	0.884104		18.601	0.866849		18.601	0.877752		18.601	0.866615		18.601	0.874675
18.651	0.85303		18.651	0.866423		18.651	0.866517		18.651	0.86667		18.651	0.868915		18.651	0.869627		18.651	0.867479		18.6511	0.877206		18.6511	0.866183		18.651	0.880226		18.651	0.865339		18.651	0.885857		18.651	0.866471		18.651	0.87963		18.651	0.869641		18.651	0.875039
18.701	0.853859		18.701	0.866655		18.701	0.866662		18.701	0.866122		18.701	0.868876		18.701	0.87156		18.701	0.868725		18.7011	0.875359		18.7011	0.86775		18.701	0.880048		18.701	0.867996		18.701	0.88558		18.7011	0.868983		18.701	0.878173		18.701	0.867411		18.701	0.875119
18.751	0.853054		18.751	0.864724		18.7511	0.868382		18.751	0.870364		18.751	0.867187		18.751	0.869309		18.751	0.868519		18.7511	0.874691		18.7511	0.866109		18.751	0.882089		18.751	0.86463		18.7511	0.885574		18.7511	0.8673		18.751	0.879577		18.751	0.865053		18.751	0.876036
18.8011	0.855891		18.801	0.864721		18.8011	0.869439		18.801	0.870121		18.801	0.868141		18.801	0.870909		18.801	0.865986		18.8011	0.874605		18.8011	0.868119		18.801	0.881435		18.801	0.868733		18.8011	0.885264		18.8011	0.866131		18.801	0.877907		18.801	0.867656		18.801	0.875829
18.8511	0.853364		18.851	0.867911		18.8511	0.868827		18.851	0.870606		18.851	0.868861		18.851	0.873188		18.851	0.866476		18.8511	0.874792		18.8511	0.868204		18.851	0.878036		18.851	0.864003		18.8511	0.883661		18.8511	0.866097		18.851	0.878769		18.851	0.868213		18.851	0.87387
18.9011	0.853316		18.9011	0.866563		18.9011	0.867784		18.901	0.865961		18.901	0.86517		18.901	0.872279		18.901	0.86702		18.9011	0.875624		18.9011	0.866384		18.901	0.879546		18.901	0.868213		18.9011	0.8857		18.9011	0.867904		18.901	0.879813		18.901	0.865563		18.901	0.877476
18.9511	0.856692		18.9511	0.865649		18.9511	0.866183		18.951	0.868574		18.951	0.866323		18.951	0.871478		18.951	0.867061		18.9511	0.875548		18.9511	0.866152		18.951	0.877896		18.951	0.865625		18.9511	0.883068		18.9511	0.86945		18.951	0.876088		18.951	0.865721		18.951	0.877058
19.0011	0.851728		19.0011	0.867659		19.0011	0.864636		19.001	0.865754		19.001	0.865731		19.001	0.872074		19.001	0.867465		19.0011	0.874168		19.0011	0.867914		19.001	0.879785		19.001	0.863774		19.0011	0.8871		19.0011	0.866122		19.001	0.877432		19.001	0.866673		19.001	0.876491
19.0511	0.853921		19.0511	0.864461		19.0511	0.868429		19.051	0.867914		19.051	0.865638		19.051	0.871613		19.051	0.868215		19.0511	0.875558		19.0511	0.865021		19.051	0.880183		19.051	0.867887		19.0511	0.884984		19.0511	0.866787		19.051	0.879283		19.051	0.866011		19.0511	0.874616
19.1011	0.856194		19.1011	0.86746		19.1011	0.869419		19.101	0.868438		19.101	0.868482		19.101	0.870838		19.101	0.866764		19.1011	0.877493		19.1011	0.867423		19.101	0.880129		19.101	0.865882		19.1011	0.887982		19.1011	0.867595		19.101	0.878138		19.101	0.867659		19.1011	0.875669
19.1511	0.856671		19.1511	0.866814		19.1511	0.86923		19.151	0.869168		19.151	0.865398		19.151	0.872679		19.151	0.867434		19.1511	0.873693		19.1511	0.867019		19.151	0.879515		19.151	0.865421		19.1511	0.887176		19.1511	0.867156		19.151	0.877732		19.151	0.864278		19.1511	0.874741
19.2011	0.854195		19.2011	0.865929		19.2011	0.866517		19.201	0.866862		19.201	0.866898		19.201	0.870532		19.201	0.864507		19.2011	0.874182		19.2011	0.866041		19.201	0.881555		19.201	0.8641		19.2011	0.884338		19.2011	0.86751		19.201	0.878268		19.201	0.866957		19.2011	0.873164
19.2511	0.853445		19.2511	0.867256		19.2511	0.867579		19.251	0.86776		19.251	0.868213		19.2511	0.871596		19.2511	0.865046		19.2511	0.87543		19.2511	0.866081		19.251	0.879733		19.251	0.864378		19.2511	0.886482		19.2511	0.86524		19.251	0.87907		19.251	0.864206		19.2511	0.876276
19.3011	0.856031		19.3011	0.865783		19.3011	0.869505		19.301	0.869274		19.301	0.868035		19.3011	0.872149		19.3011	0.867396		19.3011	0.873497		19.3011	0.866016		19.301	0.879225		19.301	0.864514		19.3011	0.886887		19.3011	0.869189		19.301	0.87846		19.301	0.866186		19.3011	0.873617
19.3511	0.85177		19.3511	0.866986		19.3511	0.867252		19.351	0.866907		19.351	0.864345		19.3511	0.86695		19.3511	0.866485		19.3511	0.878516		19.3511	0.868282		19.351	0.879447		19.351	0.866269		19.3511	0.884626		19.3511	0.865381		19.351	0.877911		19.351	0.864322		19.3511	0.87454
19.4011	0.85109		19.4011	0.864538		19.4011	0.866726		19.401	0.867465		19.401	0.863818		19.4011	0.872528		19.4011	0.865486		19.4011	0.875816		19.4011	0.864068		19.401	0.878888		19.401	0.8666		19.4011	0.883844		19.4011	0.868206		19.401	0.880077		19.401	0.863964		19.4011	0.877998
19.4511	0.853955		19.4511	0.866558		19.4511	0.871261		19.451	0.870852		19.451	0.866422		19.4511	0.870082		19.4511	0.865714		19.4511	0.871565		19.4511	0.866768		19.4511	0.881692		19.451	0.86544		19.4511	0.886005		19.4511	0.864777		19.451	0.877044		19.451	0.866684		19.4511	0.874673
19.5011	0.853197		19.5011	0.866497		19.5011	0.86658		19.501	0.869212		19.501	0.868006		19.5011	0.872475		19.5011	0.86689		19.5011	0.874632		19.5011	0.870248		19.501	0.878987		19.5011	0.86458		19.5011	0.884903		19.5011	0.86787		19.501	0.877574		19.501	0.868201		19.5011	0.87668
19.5511	0.855014		19.5511	0.869177		19.5511	0.86735		19.551	0.867729		19.551	0.865595		19.5511	0.873013		19.5511	0.866401		19.5511	0.874071		19.5511	0.86676		19.5511	0.880891		19.5511	0.864372		19.5511	0.884449		19.5511	0.865149		19.551	0.876581		19.551	0.866427		19.5511	0.873487
19.6011	0.850795		19.6011	0.869166		19.6011	0.867653		19.601	0.869465		19.601	0.869324		19.6011	0.87213		19.6011	0.867194		19.6011	0.875663		19.6011	0.863772		19.6011	0.882698		19.6011	0.86653		19.6011	0.884471		19.6011	0.863253		19.601	0.877774		19.601	0.864552		19.6011	0.877508
19.6511	0.852182		19.6511	0.865126		19.6511	0.868193		19.651	0.869479		19.651	0.86616		19.6511	0.871384		19.6511	0.865443		19.6511	0.874354		19.6511	0.864372		19.6511	0.878903		19.6511	0.867336		19.6511	0.883793		19.6511	0.863627		19.651	0.876427		19.651	0.867128		19.6511	0.877968
19.7011	0.852901		19.7011	0.864512		19.7011	0.867062		19.701	0.867639		19.701	0.863231		19.7011	0.871358		19.7011	0.865251		19.7011	0.876657		19.7011	0.865151		19.7011	0.88004		19.7011	0.866531		19.7011	0.883825		19.7011	0.864173		19.701	0.877256		19.7011	0.865602		19.7011	0.874929
19.7511	0.854584		19.7511	0.866614		19.7511	0.868728		19.751	0.869789		19.751	0.865858		19.7511	0.872433		19.7511	0.866578		19.7511	0.875023		19.7511	0.865587		19.7511	0.880801		19.7511	0.867781		19.7511	0.886667		19.7511	0.868199		19.751	0.876889		19.7511	0.865466		19.7511	0.876895
19.8011	0.853153		19.8011	0.865294		19.8011	0.865741		19.801	0.868784		19.801	0.866078		19.8011	0.874069		19.8011	0.866935		19.8011	0.875353		19.8011	0.866399		19.8011	0.883066		19.8011	0.864555		19.8011	0.884473		19.8011	0.866755		19.8011	0.876324		19.8011	0.869173		19.8011	0.872958
19.8511	0.85304		19.8511	0.866466		19.8511	0.86603		19.851	0.867807		19.851	0.867048		19.8511	0.869368		19.8511	0.867241		19.8511	0.873007		19.8511	0.867446		19.8511	0.878581		19.8511	0.864643		19.8511	0.886812		19.8511	0.868563		19.8511	0.874564		19.8511	0.865943		19.8511	0.874636
19.9011	0.853465		19.9011	0.865615		19.9011	0.86864		19.901	0.867464		19.901	0.866153		19.9011	0.871676		19.9011	0.86566		19.9011	0.872677		19.9011	0.867404		19.9011	0.880179		19.9011	0.866907		19.9011	0.882286		19.9011	0.866242		19.9011	0.8769		19.9011	0.866231		19.9011	0.876946
19.9511	0.854816		19.9511	0.867075		19.9511	0.866438		19.951	0.86818		19.9511	0.866024		19.9511	0.869761		19.9511	0.86628		19.9511	0.873648		19.9511	0.865309		19.9511	0.878855		19.9511	0.865264		19.9511	0.885125		19.9511	0.866506		19.9511	0.877498		19.9511	0.863967		19.9511	0.874194
20.0011	0.852762		20.0011	0.867025		20.0011	0.867015		20.0011	0.869466		20.0011	0.866854		20.0011	0.869659		20.0011	0.867053		20.0011	0.87554		20.0011	0.86736		20.0011	0.88113		20.0011	0.868545		20.0011	0.88672		20.0011	0.866191		20.0011	0.877844		20.0011	0.864022		20.0011	0.873609
20.0511	0.851717		20.0511	0.867663		20.0511	0.866988		20.0511	0.869719		20.0511	0.865719		20.0511	0.868631		20.0511	0.864039		20.0511	0.873099		20.0511	0.867833		20.0511	0.879915		20.0511	0.864719		20.0511	0.88559		20.0511	0.865409		20.0511	0.87763		20.0511	0.866132		20.0511	0.876192
20.1011	0.850779		20.1011	0.868356		20.1011	0.867027		20.1011	0.869134		20.1011	0.86787		20.1011	0.871283		20.1011	0.867262		20.1011	0.873291		20.1011	0.867989		20.1011	0.879595		20.1011	0.862303		20.1011	0.886055		20.1011	0.866902		20.1011	0.877474		20.1011	0.86693		20.1011	0.87529
20.1511	0.853692		20.1511	0.865981		20.1511	0.866432		20.1511	0.869373		20.1511	0.868193		20.1511	0.873312		20.1511	0.865822		20.1511	0.872884		20.1511	0.865269		20.1511	0.878814		20.1511	0.865745		20.1511	0.883334		20.1511	0.865746		20.1511	0.879434		20.1511	0.863446		20.1511	0.876543
20.2011	0.852413		20.2011	0.866256		20.2011	0.865487		20.2011	0.866843		20.2011	0.865073		20.2011	0.873615		20.2011	0.865226		20.2011	0.875829		20.2011	0.863248		20.2011	0.880517		20.2011	0.866382		20.2011	0.885265		20.2011	0.865269		20.2011	0.876348		20.2011	0.867756		20.2011	0.876016
20.2511	0.852508		20.2511	0.865961		20.2511	0.86872		20.2511	0.868131		20.2511	0.866993		20.2511	0.872767		20.2511	0.865654		20.2511	0.875441		20.2512	0.867625		20.2511	0.877876		20.2511	0.866387		20.2511	0.882142		20.2511	0.86486		20.2511	0.877314		20.2511	0.864321		20.2511	0.87227
20.3011	0.853567		20.3011	0.868431		20.3011	0.865732		20.3011	0.867837		20.3011	0.868553		20.3011	0.872233		20.3011	0.869376		20.3011	0.874039		20.3012	0.865881		20.3011	0.879803		20.3011	0.864518		20.3011	0.883507		20.3011	0.862646		20.3011	0.876751		20.3011	0.865125		20.3011	0.872352
20.3511	0.851997		20.3511	0.86305		20.3511	0.867992		20.3511	0.87009		20.3511	0.866263		20.3511	0.871577		20.3511	0.867172		20.3512	0.873231		20.3512	0.866464		20.3511	0.880857		20.3511	0.86469		20.3511	0.885358		20.3511	0.864643		20.3511	0.879266		20.3511	0.867032		20.3511	0.874629
20.4011	0.853157		20.4011	0.866493		20.4011	0.865017		20.4011	0.869071		20.4011	0.866687		20.4011	0.872715		20.4011	0.867506		20.4012	0.875229		20.4012	0.866422		20.4011	0.882333		20.4011	0.867093		20.4011	0.883946		20.4011	0.865713		20.4011	0.875337		20.4011	0.864211		20.4011	0.87419
20.4511	0.852687		20.4511	0.865483		20.4511	0.867432		20.4511	0.869749		20.4511	0.867145		20.4511	0.871914		20.4511	0.864856		20.4512	0.875835		20.4512	0.866538		20.4511	0.879906		20.4511	0.864279		20.4511	0.883138		20.4511	0.86489		20.4511	0.875983		20.4511	0.865198		20.4511	0.875052
20.5011	0.852113		20.5011	0.865432		20.5011	0.868792		20.5011	0.865817		20.5011	0.867138		20.5011	0.868815		20.5011	0.866368		20.5012	0.874934		20.5012	0.864964		20.5011	0.879322		20.5011	0.865043		20.5011	0.88367		20.5011	0.866183		20.5011	0.878462		20.5011	0.866868		20.5011	0.873435
20.5511	0.855128		20.5511	0.866049		20.5511	0.870646		20.5511	0.866641		20.5511	0.865385		20.5511	0.873366		20.5511	0.865564		20.5512	0.875178		20.5512	0.867006		20.5511	0.876576		20.5511	0.864515		20.5511	0.883505		20.5512	0.866825		20.5511	0.876635		20.5511	0.864965		20.5511	0.876444
20.6011	0.851804		20.6011	0.868771		20.6012	0.86528		20.6011	0.871355		20.6011	0.865665		20.6011	0.868803		20.6011	0.86604		20.6012	0.873125		20.6012	0.864627		20.6011	0.878675		20.6011	0.863164		20.6012	0.884126		20.6012	0.86641		20.6011	0.876498		20.6011	0.86468		20.6011	0.876853
20.6512	0.85262		20.6511	0.864244		20.6512	0.865607		20.6511	0.866765		20.6511	0.866278		20.6511	0.871218		20.6511	0.865733		20.6512	0.871222		20.6512	0.86497		20.6511	0.881809		20.6511	0.864468		20.6512	0.883579		20.6512	0.866182		20.6511	0.877391		20.6511	0.865256		20.6511	0.872654
20.7012	0.852129		20.7012	0.865771		20.7012	0.868423		20.7011	0.866132		20.7011	0.865721		20.7011	0.869156		20.7011	0.86421		20.7012	0.872805		20.7012	0.866705		20.7011	0.878311		20.7011	0.863571		20.7012	0.882733		20.7012	0.866037		20.7011	0.879907		20.7011	0.866482		20.7011	0.87446
20.7512	0.850621		20.7512	0.867465		20.7512	0.868878		20.7511	0.865561		20.7511	0.862149		20.7511	0.870824		20.7511	0.865845		20.7512	0.874933		20.7512	0.866629		20.7511	0.881578		20.7511	0.86522		20.7512	0.886874		20.7512	0.867642		20.7511	0.878113		20.7511	0.864562		20.7511	0.875001
20.8012	0.85554		20.8012	0.863405		20.8012	0.866494		20.8011	0.866305		20.8011	0.866044		20.8011	0.868229		20.8011	0.864817		20.8012	0.873166		20.8012	0.866597		20.8011	0.880866		20.8011	0.866526		20.8012	0.882229		20.8012	0.86523		20.8011	0.875596		20.8011	0.865006		20.8011	0.875514
20.8512	0.853231		20.8512	0.865771		20.8512	0.865279		20.8511	0.868479		20.8511	0.866087		20.8511	0.869707		20.8511	0.865336		20.8512	0.874465		20.8512	0.865436		20.8511	0.878186		20.8511	0.865661		20.8512	0.886273		20.8512	0.868022		20.8511	0.877219		20.8511	0.863748		20.8511	0.875173
20.9012	0.851276		20.9012	0.865243		20.9012	0.866353		20.9011	0.866362		20.9011	0.866858		20.9011	0.86856		20.9011	0.86464		20.9012	0.873727		20.9012	0.865705		20.9011	0.876404		20.9011	0.865408		20.9012	0.886196		20.9012	0.868265		20.9011	0.878227		20.9011	0.8645		20.9012	0.874071
20.9512	0.854566		20.9512	0.863609		20.9512	0.868026		20.9511	0.869205		20.9511	0.86483		20.9511	0.872536		20.9511	0.86498		20.9512	0.87405		20.9512	0.868568		20.9511	0.880788		20.9511	0.863523		20.9512	0.885392		20.9512	0.86584		20.9511	0.878326		20.9511	0.865182		20.9512	0.876429
21.0012	0.853975		21.0012	0.866379		21.0012	0.867294		21.0011	0.867926		21.0011	0.867547		21.0012	0.870388		21.0012	0.864543		21.0012	0.872902		21.0012	0.866274		21.0011	0.880151		21.0011	0.863463		21.0012	0.884895		21.0012	0.869557		21.0011	0.878062		21.0011	0.864577		21.0012	0.876016
21.0512	0.861553		21.0512	0.872555		21.0512	0.873227		21.0511	0.876916		21.0511	0.876242		21.0512	0.876982		21.0512	0.872437		21.0512	0.884214		21.0512	0.875315		21.0511	0.887978		21.0511	0.875266		21.0512	0.889395		21.0512	0.873888		21.0511	0.885157		21.0511	0.872547		21.0512	0.882277
21.1012	0.873497		21.1012	0.887866		21.1012	0.887103		21.1011	0.887859		21.1011	0.88465		21.1012	0.891612		21.1012	0.885943		21.1012	0.897341		21.1012	0.886854		21.1011	0.90034		21.1011	0.885029		21.1012	0.902927		21.1012	0.882811		21.1011	0.893662		21.1011	0.88619		21.1012	0.894049
21.1512	0.877623		21.1512	0.890411		21.1512	0.889842		21.1511	0.89477		21.1511	0.89402		21.1512	0.897351		21.1512	0.889298		21.1512	0.900724		21.1512	0.891744		21.1511	0.903363		21.1511	0.889129		21.1512	0.908995		21.1512	0.892174		21.1511	0.905957		21.1511	0.892658		21.1512	0.89808
21.2012	0.880579		21.2012	0.895459		21.2012	0.895926		21.2011	0.897456		21.2011	0.894468		21.2012	0.900166		21.2012	0.895254		21.2012	0.905325		21.2012	0.895794		21.2011	0.907638		21.2011	0.89616		21.2012	0.915479		21.2012	0.894854		21.2011	0.906883		21.2011	0.897879		21.2012	0.904227
21.2512	0.884127		21.2512	0.899734		21.2512	0.899276		21.2511	0.899713		21.2511	0.901227		21.2512	0.904951		21.2512	0.899408		21.2512	0.908977		21.2512	0.902262		21.2511	0.91004		21.2511	0.898126		21.2512	0.916367		21.2512	0.901904		21.2511	0.910962		21.2511	0.899856		21.2512	0.909504
21.3012	0.887109		21.3012	0.903917		21.3012	0.902794		21.3011	0.901097		21.3011	0.902433		21.3012	0.906513		21.3012	0.899892		21.3012	0.908337		21.3012	0.901039		21.3011	0.91184		21.3012	0.898897		21.3012	0.916605		21.3012	0.901804		21.3011	0.914426		21.3011	0.902991		21.3012	0.909588
21.3512	0.890898		21.3512	0.903571		21.3512	0.904223		21.3511	0.904776		21.3511	0.90626		21.3512	0.906945		21.3512	0.904815		21.3512	0.912356		21.3512	0.903463		21.3511	0.915269		21.3512	0.905251		21.3512	0.917631		21.3512	0.905137		21.3511	0.916696		21.3511	0.903973		21.3512	0.912515
21.4012	0.888976		21.4012	0.904043		21.4012	0.905822		21.4011	0.906713		21.4011	0.906344		21.4012	0.908281		21.4012	0.9039		21.4012	0.913276		21.4012	0.906039		21.4012	0.916286		21.4012	0.906918		21.4012	0.917794		21.4012	0.906565		21.4011	0.912583		21.4011	0.90559		21.4012	0.912867
21.4512	0.893458		21.4512	0.906212		21.4512	0.909776		21.4511	0.908772		21.4511	0.906923		21.4512	0.911735		21.4512	0.907891		21.4512	0.913794		21.4512	0.907842		21.4512	0.920373		21.4512	0.905603		21.4512	0.921264		21.4512	0.908555		21.4511	0.919718		21.4511	0.906182		21.4512	0.916364
21.5012	0.893979		21.5012	0.910025		21.5012	0.908722		21.5011	0.909581		21.5011	0.907652		21.5012	0.912036		21.5012	0.909862		21.5012	0.917851		21.5012	0.910823		21.5012	0.920793		21.5012	0.909715		21.5012	0.923635		21.5012	0.909213		21.5011	0.920029		21.5011	0.908733		21.5012	0.917132
21.5512	0.893817		21.5512	0.909409		21.5512	0.911382		21.5511	0.909673		21.5511	0.911546		21.5512	0.914327		21.5512	0.90972		21.5512	0.918681		21.5512	0.911052		21.5512	0.922164		21.5512	0.912166		21.5512	0.923375		21.5512	0.909827		21.5511	0.921255		21.5512	0.908383		21.5512	0.917757
21.6012	0.895793		21.6012	0.912745		21.6012	0.909813		21.6011	0.913997		21.6011	0.91109		21.6012	0.916917		21.6012	0.913174		21.6012	0.919436		21.6012	0.912869		21.6012	0.922281		21.6012	0.9109		21.6012	0.926097		21.6012	0.914463		21.6011	0.92391		21.6012	0.911458		21.6012	0.921205
21.6512	0.895914		21.6512	0.912564		21.6512	0.912185		21.6511	0.915557		21.6511	0.912022		21.6512	0.914747		21.6512	0.914971		21.6512	0.921492		21.6512	0.911543		21.6512	0.923395		21.6512	0.912163		21.6512	0.925373		21.6512	0.909901		21.6512	0.924809		21.6512	0.91283		21.6512	0.9201
21.7012	0.899417		21.7012	0.914253		21.7012	0.916543		21.7011	0.91907		21.7011	0.913788		21.7012	0.91636		21.7012	0.914472		21.7012	0.917781		21.7012	0.913511		21.7012	0.922878		21.7012	0.915072		21.7012	0.92578		21.7012	0.915895		21.7012	0.921994		21.7012	0.912173		21.7012	0.920955
21.7512	0.89966		21.7512	0.914324		21.7512	0.916887		21.7511	0.915775		21.7512	0.916814		21.7512	0.917564		21.7512	0.913283		21.7512	0.921913		21.7512	0.917014		21.7512	0.92389		21.7512	0.915962		21.7512	0.927408		21.7512	0.914753		21.7512	0.924984		21.7512	0.912194		21.7512	0.924564
21.8012	0.903299		21.8012	0.916237		21.8012	0.916992		21.8011	0.916822		21.8012	0.917398		21.8012	0.918819		21.8012	0.915963		21.8012	0.923762		21.8012	0.916301		21.8012	0.928226		21.8012	0.917123		21.8012	0.929331		21.8012	0.914333		21.8012	0.927244		21.8012	0.912961		21.8012	0.924605
21.8512	0.903374		21.8512	0.920299		21.8512	0.917792		21.8512	0.918928		21.8512	0.917174		21.8512	0.922541		21.8512	0.919182		21.8512	0.922057		21.8512	0.917332		21.8512	0.925319		21.8512	0.914472		21.8512	0.925931		21.8512	0.919514		21.8512	0.926736		21.8512	0.917278		21.8512	0.926961
21.9012	0.902339		21.9012	0.919766		21.9012	0.917358		21.9012	0.91851		21.9012	0.91537		21.9012	0.921835		21.9012	0.916131		21.9012	0.926029		21.9012	0.917464		21.9012	0.92842		21.9012	0.919291		21.9012	0.928258		21.9012	0.918004		21.9012	0.928011		21.9012	0.916227		21.9012	0.924067
21.9512	0.90637		21.9512	0.917739		21.9512	0.921713		21.9512	0.9183		21.9512	0.917722		21.9512	0.923		21.9512	0.914538		21.9512	0.927954		21.9512	0.918333		21.9512	0.928636		21.9512	0.916245		21.9512	0.930087		21.9512	0.92013		21.9512	0.927882		21.9512	0.920003		21.9512	0.924716
21.9912	0.90637		21.9912	0.917739		21.9912	0.921713		21.9912	0.9183		21.9912	0.917722		21.9912	0.923		21.9912	0.914538		21.9912	0.927954		21.9912	0.918333		21.9912	0.928636		21.9912	0.916245		21.9912	0.930087		21.9912	0.92013		21.9912	0.927882		21.9912	0.920003		21.9912	0.924716
