# Supplementary material for: Binding and sequestration of poison frog alkaloids by a plasma globulin
Source: eLife journal article supplement (doi:10.7554/elife.85096), 2023-12-14
Supplement: fig5-data1 [file OsABG+PTX_R2 analysis_CapillaryScanRawData.xlsx]

## Sheet: RawData
NanoTemper Technologies	NanoTemper Technologies
MO.Affinity Analysis v3.0.5	MO.Affinity Analysis v3.0.5
Origin of exported data	Origin of exported data
Project Title:	20230407_BSA+PTX
Comment:
Project File Path:	C:\Users\nanotemper\Desktop\Aurora_MST\20230407_BSA\BSA+PTX analysis.nta3
Analysis-Set Name:	OsABG+PTX
Exported from:	Capillary Scan (Raw Data Inspection)
Exported on:	2023-04-11 08:20:23
Sample Information	Sample Information		Sample Information	Sample Information		Sample Information	Sample Information		Sample Information	Sample Information		Sample Information	Sample Information		Sample Information	Sample Information		Sample Information	Sample Information		Sample Information	Sample Information		Sample Information	Sample Information		Sample Information	Sample Information		Sample Information	Sample Information		Sample Information	Sample Information		Sample Information	Sample Information		Sample Information	Sample Information		Sample Information	Sample Information		Sample Information	Sample Information
Merge-Set Name:	OsABG+PTX_R2 (#21)		Merge-Set Name:	OsABG+PTX_R2 (#21)		Merge-Set Name:	OsABG+PTX_R2 (#21)		Merge-Set Name:	OsABG+PTX_R2 (#21)		Merge-Set Name:	OsABG+PTX_R2 (#21)		Merge-Set Name:	OsABG+PTX_R2 (#21)		Merge-Set Name:	OsABG+PTX_R2 (#21)		Merge-Set Name:	OsABG+PTX_R2 (#21)		Merge-Set Name:	OsABG+PTX_R2 (#21)		Merge-Set Name:	OsABG+PTX_R2 (#21)		Merge-Set Name:	OsABG+PTX_R2 (#21)		Merge-Set Name:	OsABG+PTX_R2 (#21)		Merge-Set Name:	OsABG+PTX_R2 (#21)		Merge-Set Name:	OsABG+PTX_R2 (#21)		Merge-Set Name:	OsABG+PTX_R2 (#21)		Merge-Set Name:	OsABG+PTX_R2 (#21)
Run Name:	OsABG+PTX_R2 (#21)		Run Name:	OsABG+PTX_R2 (#21)		Run Name:	OsABG+PTX_R2 (#21)		Run Name:	OsABG+PTX_R2 (#21)		Run Name:	OsABG+PTX_R2 (#21)		Run Name:	OsABG+PTX_R2 (#21)		Run Name:	OsABG+PTX_R2 (#21)		Run Name:	OsABG+PTX_R2 (#21)		Run Name:	OsABG+PTX_R2 (#21)		Run Name:	OsABG+PTX_R2 (#21)		Run Name:	OsABG+PTX_R2 (#21)		Run Name:	OsABG+PTX_R2 (#21)		Run Name:	OsABG+PTX_R2 (#21)		Run Name:	OsABG+PTX_R2 (#21)		Run Name:	OsABG+PTX_R2 (#21)		Run Name:	OsABG+PTX_R2 (#21)
Date of Measurement:	2023-04-11 07:54:00		Date of Measurement:	2023-04-11 07:54:26		Date of Measurement:	2023-04-11 07:54:53		Date of Measurement:	2023-04-11 07:55:20		Date of Measurement:	2023-04-11 07:55:47		Date of Measurement:	2023-04-11 07:56:13		Date of Measurement:	2023-04-11 07:56:40		Date of Measurement:	2023-04-11 07:57:07		Date of Measurement:	2023-04-11 07:57:33		Date of Measurement:	2023-04-11 07:58:00		Date of Measurement:	2023-04-11 07:58:27		Date of Measurement:	2023-04-11 07:58:53		Date of Measurement:	2023-04-11 07:59:20		Date of Measurement:	2023-04-11 07:59:47		Date of Measurement:	2023-04-11 08:00:14		Date of Measurement:	2023-04-11 08:00:40
Capillary Type:	Monolith Premium Capillary		Capillary Type:	Monolith Premium Capillary		Capillary Type:	Monolith Premium Capillary		Capillary Type:	Monolith Premium Capillary		Capillary Type:	Monolith Premium Capillary		Capillary Type:	Monolith Premium Capillary		Capillary Type:	Monolith Premium Capillary		Capillary Type:	Monolith Premium Capillary		Capillary Type:	Monolith Premium Capillary		Capillary Type:	Monolith Premium Capillary		Capillary Type:	Monolith Premium Capillary		Capillary Type:	Monolith Premium Capillary		Capillary Type:	Monolith Premium Capillary		Capillary Type:	Monolith Premium Capillary		Capillary Type:	Monolith Premium Capillary		Capillary Type:	Monolith Premium Capillary
Capillary Position:	1		Capillary Position:	9		Capillary Position:	2		Capillary Position:	10		Capillary Position:	3		Capillary Position:	11		Capillary Position:	4		Capillary Position:	12		Capillary Position:	5		Capillary Position:	13		Capillary Position:	6		Capillary Position:	14		Capillary Position:	7		Capillary Position:	15		Capillary Position:	8		Capillary Position:	16
Ligand:	PTX		Ligand:	PTX		Ligand:	PTX		Ligand:	PTX		Ligand:	PTX		Ligand:	PTX		Ligand:	PTX		Ligand:	PTX		Ligand:	PTX		Ligand:	PTX		Ligand:	PTX		Ligand:	PTX		Ligand:	PTX		Ligand:	PTX		Ligand:	PTX		Ligand:	PTX
Ligand Concentration:	0.001		Ligand Concentration:	3.90625e-06		Ligand Concentration:	0.0005		Ligand Concentration:	1.95313e-06		Ligand Concentration:	0.00025		Ligand Concentration:	9.76563e-07		Ligand Concentration:	0.000125		Ligand Concentration:	4.88281e-07		Ligand Concentration:	6.25e-05		Ligand Concentration:	2.44141e-07		Ligand Concentration:	3.125e-05		Ligand Concentration:	1.2207e-07		Ligand Concentration:	1.5625e-05		Ligand Concentration:	6.10352e-08		Ligand Concentration:	7.8125e-06		Ligand Concentration:	3.05176e-08
Target:	OsABG		Target:	OsABG		Target:	OsABG		Target:	OsABG		Target:	OsABG		Target:	OsABG		Target:	OsABG		Target:	OsABG		Target:	OsABG		Target:	OsABG		Target:	OsABG		Target:	OsABG		Target:	OsABG		Target:	OsABG		Target:	OsABG		Target:	OsABG
TargetConcentration:	5e-09		TargetConcentration:	5e-09		TargetConcentration:	5e-09		TargetConcentration:	5e-09		TargetConcentration:	5e-09		TargetConcentration:	5e-09		TargetConcentration:	5e-09		TargetConcentration:	5e-09		TargetConcentration:	5e-09		TargetConcentration:	5e-09		TargetConcentration:	5e-09		TargetConcentration:	5e-09		TargetConcentration:	5e-09		TargetConcentration:	5e-09		TargetConcentration:	5e-09		TargetConcentration:	5e-09
Measurement Settings	Measurement Settings		Measurement Settings	Measurement Settings		Measurement Settings	Measurement Settings		Measurement Settings	Measurement Settings		Measurement Settings	Measurement Settings		Measurement Settings	Measurement Settings		Measurement Settings	Measurement Settings		Measurement Settings	Measurement Settings		Measurement Settings	Measurement Settings		Measurement Settings	Measurement Settings		Measurement Settings	Measurement Settings		Measurement Settings	Measurement Settings		Measurement Settings	Measurement Settings		Measurement Settings	Measurement Settings		Measurement Settings	Measurement Settings		Measurement Settings	Measurement Settings
MST-Power:	Medium		MST-Power:	Medium		MST-Power:	Medium		MST-Power:	Medium		MST-Power:	Medium		MST-Power:	Medium		MST-Power:	Medium		MST-Power:	Medium		MST-Power:	Medium		MST-Power:	Medium		MST-Power:	Medium		MST-Power:	Medium		MST-Power:	Medium		MST-Power:	Medium		MST-Power:	Medium		MST-Power:	Medium
Excitation-Power:	15		Excitation-Power:	15		Excitation-Power:	15		Excitation-Power:	15		Excitation-Power:	15		Excitation-Power:	15		Excitation-Power:	15		Excitation-Power:	15		Excitation-Power:	15		Excitation-Power:	15		Excitation-Power:	15		Excitation-Power:	15		Excitation-Power:	15		Excitation-Power:	15		Excitation-Power:	15		Excitation-Power:	15
Excitation type:	Pico - RED		Excitation type:	Pico - RED		Excitation type:	Pico - RED		Excitation type:	Pico - RED		Excitation type:	Pico - RED		Excitation type:	Pico - RED		Excitation type:	Pico - RED		Excitation type:	Pico - RED		Excitation type:	Pico - RED		Excitation type:	Pico - RED		Excitation type:	Pico - RED		Excitation type:	Pico - RED		Excitation type:	Pico - RED		Excitation type:	Pico - RED		Excitation type:	Pico - RED		Excitation type:	Pico - RED
Thermostat Setpoint:	25		Thermostat Setpoint:	25		Thermostat Setpoint:	25		Thermostat Setpoint:	25		Thermostat Setpoint:	25		Thermostat Setpoint:	25		Thermostat Setpoint:	25		Thermostat Setpoint:	25		Thermostat Setpoint:	25		Thermostat Setpoint:	25		Thermostat Setpoint:	25		Thermostat Setpoint:	25		Thermostat Setpoint:	25		Thermostat Setpoint:	25		Thermostat Setpoint:	25		Thermostat Setpoint:	25
Included	Included		Included	Included		Included	Included		Included	Included		Included	Included		Included	Included		Included	Included		Included	Included		Included	Included		Included	Included		Included	Included		Included	Included		Included	Included		Included	Included		Included	Included		Included	Included
Position [capillary-index]	Raw Fluorescence [counts]		Position [capillary-index]	Raw Fluorescence [counts]		Position [capillary-index]	Raw Fluorescence [counts]		Position [capillary-index]	Raw Fluorescence [counts]		Position [capillary-index]	Raw Fluorescence [counts]		Position [capillary-index]	Raw Fluorescence [counts]		Position [capillary-index]	Raw Fluorescence [counts]		Position [capillary-index]	Raw Fluorescence [counts]		Position [capillary-index]	Raw Fluorescence [counts]		Position [capillary-index]	Raw Fluorescence [counts]		Position [capillary-index]	Raw Fluorescence [counts]		Position [capillary-index]	Raw Fluorescence [counts]		Position [capillary-index]	Raw Fluorescence [counts]		Position [capillary-index]	Raw Fluorescence [counts]		Position [capillary-index]	Raw Fluorescence [counts]		Position [capillary-index]	Raw Fluorescence [counts]
0.501142	90.5224		8.50024	52.9213		1.50123	53.5357		9.5006	37.115		2.50001	50.276		10.5006	28.2784		3.5002	36.435		11.5005	34.9141		4.50043	47.908		12.501	41.0576		5.501	24.7205		13.5007	34.1327		6.50091	34.1029		14.5009	39.6798		7.50031	33.912		15.5003	32.9815
0.502253	80.4452		8.50121	62.921		1.50296	59.8522		9.50144	42.8112		2.50091	45.3462		10.5025	31.3323		3.50124	45.2538		11.5019	34.073		4.5021	44.3859		12.5026	41.9285		5.50274	29.8948		13.5018	32.2389		6.50202	40.3121		14.502	42.9633		7.50122	44.1235		15.5021	36.7034
0.503851	97.179		8.50246	57.9107		1.50401	63.2372		9.50255	46.9716		2.50237	45.728		10.5038	26.0029		3.50229	40.3359		11.5028	41.6213		4.50328	38.636		12.5036	35.8237		5.50406	33.7659		13.5028	38.5734		6.50306	37.4908		14.503	38.8656		7.50212	45.0748		15.5035	32.6445
0.505517	107.08		8.5042	52.8736		1.50484	50.3386		9.50428	46.2469		2.50417	53.1659		10.5046	27.0526		3.50395	39.6321		11.5041	39.2503		4.50425	45.1703		12.5045	34.419		5.50503	34.1178		13.5043	45.1941		6.50459	37.786		14.5045	45.9188		7.50372	41.6869		15.5044	32.4745
0.506698	94.0654		8.50572	59.7329		1.5063	44.5082		9.50574	46.8076		2.50542	48.3136		10.5058	30.87		3.50562	39.647		11.5058	30.199		4.50571	51.8417		12.5061	35.9549		5.50635	33.9537		13.5061	33.739		6.50632	32.9517		14.5063	41.0785		7.50538	36.9569		15.5057	31.9884
0.50767	88.6495		8.5067	52.9124		1.50796	48.5701		9.50671	49.1189		2.50619	49.593		10.5076	41.8748		3.50673	37.8964		11.5073	30.9505		4.50745	50.953		12.5077	31.1354		5.50809	31.9407		13.5073	28.3589		6.50751	32.5312		14.5076	39.2444		7.50649	33.9716		15.5075	36.6796
0.509129	87.6862		8.50788	56.2973		1.50921	51.4003		9.5079	36.6736		2.50758	49.1725		10.509	43.5926		3.5077	40.7236		11.5083	36.1517		4.50884	52.2592		12.5088	39.8856		5.50961	40.9294		13.5082	31.0728		6.50848	39.82		14.5085	40.9622		7.50747	31.5768		15.509	42.5577
0.510934	86.6067		8.50961	60.7201		1.51019	53.2822		9.50956	32.2329		2.50924	45.6027		10.5099	32.6535		3.50937	41.0815		11.5094	31.6931		4.50981	49.8465		12.5098	36.7571		5.51052	37.7115		13.5097	40.8638		6.50994	38.1916		14.5098	34.9439		7.50892	30.7299		15.5098	43.8401
0.512115	106.606		8.51121	61.6446		1.51151	54.0069		9.51123	40.6103		2.51049	38.4779		10.5111	33.1097		3.51111	45.1882		11.5111	28.6154		4.51106	50.0643		12.5113	32.9248		5.5117	36.5752		13.5115	34.252		6.51174	42.0686		14.5117	42.7128		7.51073	31.7468		15.5109	45.3462
0.513017	93.457		8.51218	62.6646		1.51331	51.0514		9.51227	40.0079		2.51146	46.0769		10.5128	30.1871		3.51208	46.8284		11.5128	31.6842		4.51279	47.4159		12.513	38.2125		5.51343	30.5211		13.5128	27.1212		6.51299	39.1698		14.513	43.2854		7.51198	38.29		15.5126	37.4938
0.514545	75.3663		8.51322	51.0424		1.5147	43.861		9.51331	39.5367		2.51278	46.0978		10.5144	30.8104		3.51298	33.1247		11.5139	32.1017		4.51432	43.2795		12.5144	37.3118		5.51503	28.3321		13.5137	30.712		6.51389	34.6367		14.5139	43.7179		7.51295	46.1067		15.5141	36.5901
0.516351	92.1508		8.51496	47.9379		1.5156	42.85		9.51484	35.3256		2.51452	39.6052		10.5154	28.4007		3.51444	42.3192		11.5149	33.7152		4.51522	38.5525		12.5153	39.2533		5.516	38.5137		13.5151	32.6147		6.51542	31.8184		14.5153	40.485		7.51427	34.6188		15.5151	36.775
0.517601	95.2554		8.51663	58.4177		1.51685	37.7741		9.51658	38.132		2.51605	33.238		10.5165	24.6638		3.5161	44.5917		11.5165	33.8404		4.51641	33.1903		12.5166	35.6805		5.51711	43.4226		13.517	39.0625		6.51723	33.3424		14.5171	40.7147		7.51608	43.2079		15.5162	45.5013
0.518365	79.8934		8.5176	62.0234		1.51866	43.1512		9.51776	45.6683		2.51702	43.7119		10.5181	30.6732		3.51729	43.2049		11.5183	37.6966		4.51821	33.9388		12.5185	29.8829		5.51892	34.5234		13.5182	36.0026		6.51841	37.458		14.5184	38.7523		7.51747	34.6934		15.5179	41.3499
0.519684	96.0815		8.5185	57.0488		1.52019	54.8181		9.51866	43.5598		2.51813	49.5632		10.5198	35.3644		3.51826	42.4683		11.5193	31.9466		4.51974	37.8427		12.5198	31.4575		5.52052	29.4773		13.519	35.8982		6.51924	31.4158		14.5192	40.6013		7.51837	31.9258		15.5196	32.2657
0.52142	103.463		8.52003	69.503		1.52109	46.7867		9.52026	44.5678		2.51987	46.9775		10.5209	37.458		3.51972	37.6399		11.5201	35.4151		4.52057	42.6532		12.5207	40.8638		5.52142	35.7491		13.5202	36.1756		6.52056	34.0879		14.5204	41.2157		7.51969	37.6906		15.5207	32.8712
0.52274	99.368		8.52163	59.6196		1.52227	37.8725		9.52206	41.2246		2.52153	45.0987		10.5219	41.6094		3.52145	43.9475		11.5217	34.9469		4.52161	47.4756		12.5221	42.2118		5.52239	40.7773		13.522	40.5447		6.52223	41.8509		14.5221	38.1022		7.52149	42.0746		15.5216	37.0762
0.523642	94.814		8.52274	51.9789		1.52414	46.7926		9.5231	40.5805		2.52251	37.6399		10.5235	34.0044		3.52284	42.0478		11.5233	33.8523		4.52328	44.3412		12.5239	37.6846		5.52399	38.9909		13.5234	37.792		6.52362	40.6192		14.5235	45.2836		7.52295	34.4816		15.5232	41.4483
0.524892	90.1765		8.52378	51.1856		1.52567	52.2205		9.52394	37.3208		2.52355	43.7477		10.5253	39.1251		3.52374	36.6229		11.5245	37.7771		4.52488	43.6523		12.5253	40.8876		5.52559	29.1522		13.5243	32.4208		6.52459	32.5729		14.5246	46.062		7.52372	33.3483		15.525	33.6764
0.526629	100.161		8.52524	56.9952		1.5265	52.3994		9.5254	36.6438		2.52528	40.5805		10.5263	33.3334		3.52506	39.5724		11.5254	38.6121		4.52592	51.3854		12.5261	41.6153		5.5267	40.0168		13.5255	41.4692		6.52584	29.1492		14.5258	44.5798		7.5249	41.0725		15.5262	29.2685
0.528226	96.5467		8.52704	62.2172		1.52748	46.05		9.52706	44.6752		2.52695	49.0204		10.5272	30.1274		3.52687	36.28		11.5269	35.4658		4.52696	41.7973		12.5272	38.3586		5.52767	38.4392		13.5272	39.0326		6.52751	29.1969		14.5274	37.0166		7.52656	37.4192		15.5271	35.436
0.529198	86.8572		8.52829	59.1186		1.52914	52.1906		9.52831	54.8211		2.52792	52.7633		10.5286	35.2272		3.52833	35.2272		11.5286	34.0969		4.52856	48.2838		12.5289	36.8943		5.5292	35.09		13.5288	34.3027		6.5291	32.0689		14.5291	44.6126		7.52802	31.9735		15.5287	38.6121
0.53024	85.5211		8.52927	52.7722		1.53074	49.6706		9.52928	45.555		2.52883	41.3052		10.5303	31.5947		3.52923	45.8562		11.53	24.6608		4.53029	52.2205		12.5303	34.6546		5.531	29.3759		13.5299	29.689		6.53008	32.9755		14.5301	45.2418		7.52899	38.0246		15.5305	38.5048
0.531976	85.2736		8.53059	53.1092		1.53178	57.4962		9.53067	37.8397		2.53035	37.2492		10.5315	30.0678		3.53048	40.3628		11.5309	24.5147		4.53148	49.8793		12.5314	34.8991		5.53225	27.8072		13.5309	31.8363		6.53119	33.1008		14.5312	40.6222		7.5301	37.8576		15.5316	38.2036
0.533643	96.3588		8.53239	63.1507		1.53282	55.8142		9.53241	36.3396		2.53202	40.2733		10.5324	27.1839		3.53229	38.4242		11.5322	31.9765		4.53245	52.5992		12.5326	29.8173		5.53316	36.1308		13.5326	42.0537		6.53285	34.6397		14.5328	44.5261		7.53177	36.945		15.5324	37.8666
0.534684	88.6853		8.53378	53.4164		1.53435	47.5949		9.53387	44.04		2.53313	41.9016		10.5339	30.4107		3.53374	36.0831		11.534	31.9019		4.53391	40.8966		12.5341	37.2969		5.53461	54.6332		13.5343	36.6319		6.53452	35.8237		14.5345	44.4664		7.53344	38.6807		15.5338	33.0978
0.535726	97.2893		8.53468	50.3446		1.53609	44.3412		9.53477	38.1737		2.5341	36.9003		10.5356	28.9912		3.53458	46.5242		11.5355	40.9473		4.53571	39.9303		12.5358	38.5167		5.53635	35.2481		13.5354	37.795		6.53556	36.9569		14.5356	41.499		7.53455	36.3754		15.5355	26.2057
0.537392	94.8945		8.536	52.5605		1.53727	45.0838		9.53595	37.7562		2.53556	45.3015		10.537	32.1107		3.53569	43.184		11.5364	44.8601		4.53696	47.4279		12.5369	38.6837		5.53767	32.0003		13.5364	36.4201		6.5366	36.7213		14.5366	45.4566		7.53552	40.491		15.5368	30.1065
0.539059	82.4344		8.53781	57.5916		1.53824	52.3517		9.53769	44.4873		2.53737	48.6417		10.5379	33.7509		3.53735	37.7115		11.5376	37.0106		4.53786	49.5573		12.538	36.8227		5.53857	25.9373		13.538	35.2809		6.53827	43.8819		14.5383	49.763		7.53712	38.5077		15.5378	37.3983
0.540031	93.9074		8.5392	57.019		1.5397	52.6231		9.53928	47.7321		2.53869	44.0101		10.5392	34.8007		3.53888	41.3201		11.5394	30.9863		4.53932	45.1225		12.5395	36.5066		5.53996	31.1176		13.5397	32.2777		6.54001	39.4084		14.54	45.3731		7.53885	30.1811		15.5391	34.2878
0.540934	94.0535		8.54003	57.8093		1.54151	52.8438		9.54026	43.7477		2.53959	41.3022		10.541	35.8535		3.53992	38.7374		11.5409	29.7278		4.54113	38.0813		12.5412	34.0402		5.54184	38.5525		13.5408	29.355		6.54098	33.3632		14.541	41.1859		7.54003	35.3912		15.5408	40.5447
0.542462	84.8471		8.54114	63.6875		1.54282	45.5997		9.54137	42.2416		2.54091	37.0524		10.5424	37.2492		3.54097	36.3277		11.5417	27.6372		4.54238	45.9218		12.5424	34.4607		5.54316	36.7213		13.5416	27.9265		6.54181	38.5584		14.5419	46.9179		7.54094	47.243		15.5423	39.6977
0.544128	86.6961		8.54281	51.1886		1.54366	40.2375		9.5431	36.5782		2.54271	33.4587		10.5433	41.7287		3.54256	38.9849		11.5428	33.4527		4.54321	42.0478		12.5434	34.1893		5.54392	36.8019		13.5431	27.9354		6.54334	33.5332		14.5433	47.5889		7.54254	33.6317		15.5433	39.9393
0.54524	96.2395		8.54434	50.4728		1.54512	49.6527		9.5447	39.2832		2.54417	37.9948		10.5446	33.0531		3.5443	45.4088		11.5445	30.4316		4.54453	36.2561		12.5449	39.6977		5.54517	36.3247		13.5447	36.2114		6.545	37.4788		14.5451	45.3522		7.54434	30.8342		15.5444	40.3926
0.546281	80.8627		8.54531	53.7892		1.54699	51.3168		9.5456	45.0838		2.54508	44.9496		10.5464	37.792		3.54548	42.7725		11.546	34.1536		4.5462	40.2226		12.5467	32.2926		5.54684	37.1418		13.5459	36.9868		6.54619	33.7599		14.5462	44.705		7.54545	35.266		15.5462	36.098
0.54774	81.3995		8.54642	53.7027		1.54824	44.9406		9.54658	48.5194		2.54633	46.5839		10.5479	37.6876		3.54645	41.5974		11.5471	29.9485		4.54759	40.6848		12.5478	33.5929		5.54829	33.748		13.5469	37.2761		6.54716	34.1476		14.5472	45.1196		7.54628	40.0258		15.5478	36.5782
0.549476	96.508		8.54809	53.2553		1.549	47.1953		9.54817	45.6266		2.5482	40.998		10.5488	35.4538		3.54791	42.7516		11.5481	28.3201		4.54856	40.3031		12.5487	30.9207		5.54927	29.7248		13.5484	30.0171		6.54862	30.6672		14.5486	54.8061		7.54767	31.8154		15.5488	33.3811
0.550795	96.1024		8.54975	53.8011		1.55026	53.992		9.54977	42.677		2.54959	39.483		10.5498	30.4495		3.54972	37.8755		11.5497	32.4387		4.54981	46.724		12.5501	26.4114		5.55045	38.7911		13.5502	27.6581		6.55042	41.4006		14.5504	51.1319		7.54941	38.0216		15.5498	41.6601
0.551698	91.3247		8.55086	60.6575		1.55199	49.7064		9.55088	41.0338		2.55042	42.7486		10.5515	32.5312		3.5509	42.9544		11.5515	31.5112		4.55154	46.6465		12.5517	31.4903		5.55211	32.4		13.5515	32.9785		6.55174	42.2118		14.5518	35.2272		7.55066	35.3674		15.5516	44.6633
0.553017	98.9445		8.55184	59.6972		1.55331	50.3535		9.55185	38.0693		2.55153	48.8654		10.553	38.2692		3.5518	38.3944		11.5526	28.5945		4.55314	49.1696		12.553	34.8276		5.55378	31.6186		13.5525	36.0384		6.55264	27.8847		14.5527	38.0992		7.55156	33.0769		15.5532	31.1712
0.554823	112.338		8.55336	60.8125		1.55428	57.4813		9.55338	39.3249		2.5532	40.831		10.554	39.7544		3.55333	35.8177		11.5535	34.5562		4.55411	43.8819		12.5539	31.9765		5.55482	32.3493		13.5537	32.4536		6.55396	33.7837		14.5539	39.1281		7.55288	38.0992		15.5541	36.2352
0.556281	102.464		8.55517	59.9835		1.55553	50.7114		9.55519	41.5199		2.55466	39.3547		10.5551	44.7826		3.55513	32.394		11.555	33.7927		4.55516	47.6098		12.5553	29.3222		5.55579	38.6986		13.5554	35.9579		6.5557	39.5009		14.5558	31.89		7.55469	34.747		15.5551	38.1648
0.557184	109.666		8.55635	54.8449		1.5572	42.2088		9.55644	40.1749		2.5557	46.8404		10.5567	32.5938		3.55638	38.4332		11.5568	29.021		4.55689	45.385		12.5571	34.6606		5.55746	39.6261		13.557	28.0159		6.55716	31.2219		14.5573	41.9285		7.55615	32.892		15.5567	39.4979
0.558434	101.7		8.55725	63.4251		1.5588	39.7603		9.55734	40.0228		2.55681	48.6238		10.5584	25.2662		3.55715	31.2905		11.5581	29.3431		4.55856	51.3914		12.5585	32.7727		5.5592	42.7277		13.5579	27.3897		6.55813	38.2543		14.5582	47.1505		7.55705	28.1293		15.5583	37.1955
0.560309	97.5935		8.55885	58.9993		1.55984	42.9365		9.55873	44.5738		2.55841	50.0076		10.5596	26.5725		3.55847	29.9127		11.559	31.4635		4.5596	53.6579		12.5595	31.6693		5.56024	39.2235		13.5592	34.6069		6.55938	44.8512		14.5594	45.5341		7.55823	28.9494		15.5594	35.2898
0.561698	92.5117		8.56059	54.5735		1.56088	47.8036		9.5606	44.2726		2.56008	42.5458		10.5606	35.8654		3.56013	34.3355		11.5604	28.511		4.56064	49.0085		12.5607	38.6897		5.56121	35.1675		13.5609	35.5314		6.56119	41.5646		14.5612	45.4655		7.56003	29.8411		15.5604	33.8643
0.562531	77.1616		8.5617	51.8686		1.56255	48.7252		9.56192	45.1941		2.56119	39.5903		10.562	27.1063		3.56145	32.9308		11.5622	29.9515		4.56231	46.3632		12.5623	34.7202		5.56288	33.3662		13.5624	33.7002		6.56264	37.5653		14.5627	48.3285		7.56156	33.9209		15.5619	35.1407
0.563642	86.6096		8.56253	53.822		1.56428	50.5205		9.56276	44.1384		2.56223	40.1152		10.5638	28.0786		3.56242	40.0377		11.5635	32.2956		4.56398	52.307		12.5639	31.5619		5.56461	34.3265		13.5633	43.3689		6.56348	33.1247		14.5635	51.7135		7.56254	34.0015		15.5637	35.5612
0.565309	99.3471		8.56392	64.2243		1.56532	49.5036		9.56415	39.9363		2.56376	40.0347		10.565	34.4876		3.56374	39.0804		11.5642	38.1678		4.56495	58.9068		12.565	29.3043		5.56566	34.9081		13.5643	36.3605		6.56459	39.3756		14.5646	41.1232		7.56372	40.2792		15.5649	31.4247
0.566837	85.533		8.56559	64.5911		1.5663	48.5671		9.56602	34.6606		2.56556	41.8658		10.5659	32.1733		3.56548	36.0414		11.5656	27.9116		4.56585	58.6265		12.566	34.8902		5.56649	34.1029		13.566	34.6337		6.56626	30.1722		14.5662	34.4727		7.56545	34.8872		15.5658	35.4091
0.567879	96.326		8.56691	66.634		1.56796	59.1693		9.56727	34.3713		2.56674	47.9915		10.5674	31.3353		3.56701	32.7131		11.5673	32.051		4.56738	44.9824		12.5678	39.9989		5.56795	37.1806		13.5675	33.9627		6.56778	29.3013		14.5678	43.0289		7.56705	30.8491		15.5672	37.9471
0.56892	98.6672		8.56788	67.0396		1.5697	53.0406		9.5681	44.4127		2.56764	40.0258		10.5692	37.3625		3.56805	34.073		11.5686	34.6665		4.56898	49.429		12.5694	30.2825		5.56961	38.2811		13.5686	33.2797		6.56876	31.9675		14.5688	42.2744		7.56795	31.9973		15.569	32.7727
0.570517	88.1276		8.56913	59.891		1.57074	44.4873		9.56935	40.2733		2.56924	36.4977		10.5705	38.2453		3.56909	31.0967		11.5696	30.6762		4.57016	41.5169		12.5703	36.2054		5.57086	35.1377		13.5696	23.2591		6.56987	32.8354		14.5698	41.8718		7.56892	33.6943		15.5704	37.3506
0.572254	97.9633		8.57086	53.7534		1.57157	44.3024		9.57102	36.0831		2.57098	48.5582		10.5713	35.2511		3.57083	32.2419		11.5708	36.4231		4.57113	43.0916		12.5713	40.8787		5.57184	21.6696		13.5712	34.1029		6.57146	34.4309		14.5714	47.6694		7.57052	31.7677		15.5713	40.0287
0.573365	101.068		8.57239	69.0676		1.5731	51.2214		9.57241	35.943		2.57216	44.1771		10.5726	40.5894		3.57249	37.3417		11.5726	42.352		4.57259	47.2221		12.5729	36.6587		5.57316	30.3034		13.5729	34.3265		6.5732	33.5273		14.5732	45.2776		7.57205	33.9836		15.5726	41.8837
0.574337	89.1237		8.57336	81.9512		1.57477	57.4664		9.57345	34.1953		2.57292	47.8603		10.5742	34.24		3.57354	40.3836		11.5741	40.4075		4.57439	33.5839		12.5745	45.0182		5.57496	31.7319		13.5741	33.8643		6.57431	36.8019		14.5744	38.7702		7.57316	32.1047		15.5745	44.2189
0.575865	96.8271		8.57454	66.9352		1.57595	49.3366		9.57456	39.6858		2.57431	42.1969		10.5756	33.3901		3.57458	37.3089		11.5751	35.9191		4.57571	43.3182		12.5756	38.7523		5.57635	39.5963		13.5751	31.4188		6.57528	44.374		14.5753	32.2091		7.57413	34.9051		15.5758	36.7273
0.577601	88.748		8.57628	59.9894		1.57685	50.1448		9.57623	47.4159		2.57598	41.6988		10.5766	31.7468		3.57624	42.4892		11.5762	32.2061		4.57661	49.6885		12.5766	34.9379		5.57732	36.4768		13.5765	39.0207		6.57674	42.1253		14.5768	37.9501		7.57566	34.7053		15.5766	31.7289
0.578781	87.6356		8.57788	63.9171		1.57831	48.7312		9.5779	38.5286		2.5773	38.8239		10.5778	28.8212		3.57791	42.1462		11.5779	30.9684		4.57793	42.7277		12.5781	32.737		5.57857	42.2148		13.5784	42.3311		6.57855	37.5981		14.5786	46.3513		7.57747	31.4844		15.5778	41.7644
0.579684	99.4277		8.57885	70.8033		1.58012	51.1319		9.57894	39.7514		2.5782	42.7188		10.5795	36.2978		3.57888	37.2015		11.5795	32.8801		4.57974	48.6983		12.5798	40.8548		5.58031	42.7337		13.5797	32.2747		6.57973	36.2472		14.5798	45.9039		7.57872	39.6619		15.5795	43.688
0.581212	105.267		8.57996	63.0821		1.58144	52.2175		9.57998	37.121		2.57952	43.8968		10.5811	44.9287		3.57985	34.58		11.5806	36.1398		4.58113	37.2641		12.5811	47.076		5.58184	37.9739		13.5806	29.8888		6.58063	38.0455		14.5807	36.2472		7.57962	44.2338		15.5809	41.0576
0.583087	96.4155		8.5817	61.3344		1.58234	60.4964		9.58158	34.7709		2.58133	39.7663		10.5821	44.7498		3.58138	41.1918		11.5816	28.6959		4.5821	42.1879		12.582	40.3121		5.58281	35.9221		13.582	40.154		6.58216	26.0416		14.5822	39.4323		7.58101	42.4056		15.582	32.2329
0.584198	98.7149		8.58329	58.2507		1.58359	57.7407		9.58331	35.7223		2.58278	43.533		10.5832	32.7489		3.58298	45.2627		11.5833	33.572		4.58335	50.5116		12.5834	29.2476		5.58399	30.2855		13.5838	35.8773		6.58403	25.3617		14.584	41.8479		7.58281	34.3832		15.5831	40.4313
0.584962	91.8764		8.5842	53.9681		1.58539	54.663		9.58442	44.028		2.58369	48.2152		10.5849	39.5545		3.58416	41.8688		11.5849	41.6511		4.58516	43.6373		12.5852	32.722		5.58579	30.5748		13.5851	34.5681		6.58521	24.297		14.5853	43.8819		7.58413	40.3985		15.5848	37.5981
0.586351	89.4071		8.5851	65.0266		1.58685	35.9191		9.5854	47.1863		2.58487	49.1546		10.5865	37.7622		3.58513	33.2976		11.5859	26.8051		4.58661	47.4159		12.5866	37.8606		5.58739	34.4757		13.5859	32.8622		6.58598	33.3722		14.586	43.6433		7.58504	36.2054		15.5864	31.7349
0.588087	84.0896		8.5867	68.8708		1.58776	37.962		9.58699	38.5525		2.5866	39.2921		10.5876	29.6145		3.58659	30.2915		11.5869	34.1655		4.58745	55.5875		12.5875	37.8308		5.58822	31.8572		13.5871	31.6245		6.58737	36.0414		14.5873	42.4683		7.58642	38.0127		15.5875	32.8205
0.589337	93.8179		8.58829	63.0344		1.589	47.0133		9.58873	33.8344		2.5882	46.4884		10.5886	32.4357		3.58833	39.6172		11.5884	40.3568		4.58856	54.1948		12.5888	39.7066		5.58927	32.8384		13.5888	31.2458		6.5891	31.2398		14.5891	35.1974		7.5883	35.9489		15.5884	29.4504
0.590309	91.5513		8.58941	64.6776		1.59088	43.0528		9.58977	39.2384		2.58924	47.8335		10.5903	37.8606		3.58965	39.2474		11.59	34.8544		4.59023	43.8819		12.5907	41.1173		5.59086	36.8078		13.5902	29.9187		6.59042	32.3015		14.5904	40.8399		7.58962	46.7747		15.5901	27.9772
0.591628	79.2015		8.59045	58.1195		1.59234	49.1308		9.5906	36.0533		2.59035	40.3538		10.5919	36.9182		3.59055	37.6966		11.5912	35.9966		4.59175	44.3829		12.5921	33.5213		5.59246	42.8202		13.5911	39.7693		6.59132	28.7108		14.5914	47.7619		7.59038	44.0191		15.5919	30.533
0.593365	89.5472		8.5919	49.3485		1.5931	46.6495		9.59206	36.8615		2.59209	40.5149		10.5929	33.1783		3.59194	37.3685		11.5922	35.3912		4.59279	43.5598		12.5928	34.1297		5.59357	38.5614		13.5924	27.333		6.59264	32.8622		14.5926	41.2217		7.59163	39.313		15.593	35.099
0.594823	81.2564		8.59371	57.9167		1.59421	43.0349		9.59373	38.3795		2.59369	48.7461		10.5938	39.2772		3.59374	45.0957		11.5936	38.0544		4.59384	41.1143		12.594	37.7741		5.59461	38.9521		13.594	30.4167		6.59438	35.594		14.5944	33.8225		7.5933	35.2123		15.5939	36.8347
0.595795	92.3804		8.59496	79.1658		1.59588	57.1562		9.59491	39.3875		2.59459	51.4063		10.5953	35.7998		3.5952	51.5584		11.5953	33.3245		4.5955	37.1836		12.5957	30.36		5.59614	36.7184		13.5956	33.5153		6.59591	38.8358		14.596	39.5605		7.59476	25.6539		15.5955	42.9276
0.596976	99.2159		8.59586	68.8469		1.59741	52.0773		9.59588	31.9079		2.59556	42.1671		10.5969	39.14		3.59604	48.1615		11.5967	36.784		4.59717	34.8395		12.5971	35.3047		5.59795	33.6525		13.5967	33.0441		6.59681	36.3515		14.5969	38.8		7.59573	29.8918		15.5973	35.2063
0.598712	97.0746		8.59725	78.9868		1.59845	45.889		9.59727	40.3687		2.59716	34.6814		10.5981	42.7874		3.59736	38.1469		11.5976	33.8494		4.59828	41.2843		12.5981	38.8448		5.59913	37.7532		13.5977	32.4775		6.59799	37.1448		14.598	42.847		7.59691	34.8395		15.5984	28.6899
0.600309	86.8751		8.59906	71.4624		1.59949	39.7901		9.59901	45.7846		2.59876	38.0604		10.5991	45.1583		3.59916	42.1879		11.5989	37.4371		4.59925	43.2556		12.5992	45.719		5.60003	40.9026		13.5995	38.8567		6.59973	41.9434		14.5997	43.0618		7.59858	34.1983		15.5992	37.7085
0.601281	90.2361		8.60038	64.9908		1.60109	36.1935		9.6004	41.3111		2.59987	42.0627		10.6006	38.97		3.60062	36.608		11.6007	50.6011		4.60078	40.3598		12.601	44.708		5.60149	32.3582		13.6011	43.2586		6.60133	36.7273		14.6014	37.5832		7.60017	34.6814		15.6007	37.9053
0.602323	96.4066		8.60128	66.5386		1.60282	45.7608		9.60137	35.1675		2.60084	43.4017		10.6023	30.023		3.60138	37.4043		11.6021	38.2095		4.60259	37.2015		12.6026	39.2295		5.60329	30.9088		13.6022	39.6052		6.60237	35.5523		14.6024	34.2758		7.60128	34.4935		15.6024	36.7541
0.604059	80.9373		8.60267	68.4861		1.60394	44.1294		9.60262	32.892		2.60237	43.7387		10.6036	26.4592		3.60249	46.6704		11.6031	37.0613		4.60377	45.218		12.6036	33.7569		5.60461	39.5516		13.6032	40.661		6.60341	32.5968		14.6034	36.9241		7.60226	31.4188		15.6037	33.1455
0.605726	88.2499		8.60454	78.6588		1.60491	40.1391		9.60435	42.2535		2.6041	44.4515		10.6045	31.887		3.60423	39.6977		11.6043	35.7789		4.60474	47.744		12.6046	35.6984		5.60552	44.8571		13.6049	27.3061		6.60514	35.943		14.6051	39.0446		7.60392	32.3433		15.6046	30.8969
0.606698	91.5991		8.60586	73.732		1.60644	47.9766		9.60588	43.858		2.60542	42.4563		10.6058	35.6745		3.60569	37.8725		11.6061	28.2694		4.6062	42.4593		12.6063	36.3396		5.60691	36.1398		13.6065	32.1763		6.60681	37.3238		14.6069	40.7862		7.60566	43.858		15.6059	41.0427
0.607601	95.7892		8.6067	64.0484		1.60824	47.0312		9.60685	34.7321		2.60633	33.1217		10.6076	35.1586		3.60673	44.2756		11.6076	36.9271		4.608	45.6206		12.608	36.617		5.60871	34.8723		13.6075	38.7076		6.60778	26.1162		14.6078	38.3616		7.60677	39.8259		15.6078	36.0682
0.609129	89.7023		8.60788	71.6921		1.60942	44.0101		9.60804	40.6133		2.60771	41.6869		10.609	35.263		3.60784	39.5456		11.6084	36.274		4.60925	37.8129		12.6091	37.4401		5.61003	33.8225		13.6084	41.3111		6.60869	27.0407		14.6087	41.7436		7.60774	35.3853		15.6092	28.1561
0.610795	91.8138		8.60954	69.679		1.61032	38.633		9.60984	41.0129		2.60952	50.774		10.61	29.7516		3.60944	35.7759		11.6095	31.3353		4.61002	54.3976		12.6101	34.0372		5.61079	35.6447		13.6099	37.0733		6.61021	30.363		14.6102	49.3932		7.60934	43.4137		15.6102	30.8044
0.611906	91.0265		8.611	67.1023		1.61185	50.5444		9.61137	48.3256		2.61084	49.772		10.6113	35.1497		3.6111	39.814		11.6112	27.6044		4.61134	47.2638		12.6117	31.1623		5.61204	27.998		13.6115	35.594		6.61188	32.2747		14.6119	48.5284		7.61115	34.1953		15.6114	43.4375
0.612879	85.4555		8.61197	64.5882		1.61366	60.8274		9.6122	36.6677		2.61174	43.3451		10.6131	44.1801		3.61222	33.2082		11.6127	30.5748		4.61307	43.5866		12.6135	35.6089		5.61378	37.5415		13.6127	40.6789		6.61306	43.4912		14.613	49.2381		7.61219	30.5211		15.6131	38.967
0.614406	89.5353		8.61315	58.9158		1.61484	48.251		9.61324	40.5178		2.61306	44.1086		10.6145	42.0776		3.61326	28.2545		11.6137	29.9395		4.61439	42.4683		12.6145	34.9349		5.61517	38.5913		13.6138	38.6867		6.61403	37.0613		14.614	44.9883		7.61302	33.0412		15.6146	41.004
0.616212	89.2132		8.61482	50.6637		1.6156	37.452		9.61484	41.3618		2.61494	50.9739		10.6153	42.5667		3.61479	39.137		11.6148	30.0201		4.61529	39.7514		12.6153	25.132		5.61614	33.3364		13.6152	34.1476		6.61549	31.2428		14.6154	47.7231		7.61448	29.8799		15.6156	44.6006
0.617462	80.0276		8.61642	57.7378		1.61699	41.7973		9.61637	42.4593		2.61633	44.0131		10.6165	34.085		3.61652	40.989		11.6164	41.004		4.61661	43.2139		12.6168	36.107		5.61732	39.6023		13.617	34.4965		6.6173	38.6121		14.6172	39.5903		7.61615	33.569		15.6168	34.1744
0.618365	73.729		8.61753	61.4358		1.61866	47.8305		9.61748	48.2868		2.61709	35.0632		10.6181	31.3293		3.6177	37.5266		11.6181	40.1361		4.61835	48.8385		12.6185	40.8966		5.61906	40.5656		13.6184	32.8354		6.61855	34.8932		14.6186	37.3566		7.61733	30.023		15.6185	36.0742
0.619754	94.5575		8.6185	71.5966		1.61998	45.6951		9.61852	44.9555		2.61827	39.2444		10.6197	31.6603		3.61867	35.257		11.6192	31.6454		4.61988	45.7011		12.6197	36.435		5.62066	37.4878		13.6193	29.695		6.61952	39.313		14.6195	40.989		7.6183	29.1999		15.6201	47.58
0.621559	98.6105		8.6201	76.4459		1.62095	47.413		9.62005	43.703		2.62001	47.3593		10.6207	36.1219		3.6202	38.0395		11.6202	38.2513		4.62085	41.5408		12.6207	30.7746		5.6217	38.8567		13.6205	32.1942		6.62084	46.4855		14.6207	41.5467		7.61969	40.8996		15.621	42.012
0.622878	89.3474		8.62183	73.4964		1.6222	45.6116		9.62185	39.8408		2.62139	44.9406		10.6217	30.5837		3.62201	44.2249		11.6217	42.7486		4.62196	42.8172		12.622	40.9085		5.62274	41.2455		13.6223	27.4075		6.62264	42.7218		14.6226	41.6034		7.62142	40.2942		15.622	34.759
0.623781	83.1114		8.62295	65.298		1.62394	38.7105		9.62303	34.1923		2.62244	50.7174		10.6233	33.7629		3.62319	46.6048		11.6235	37.6846		4.6237	46.5213		12.6238	43.6463		5.62441	34.8693		13.6238	29.4176		6.62403	33.408		14.624	43.5121		7.62288	28.3679		15.6236	36.3366
0.62517	92.959		8.62392	66.9084		1.62546	51.1498		9.62394	28.4424		2.62355	42.3848		10.6251	27.3479		3.62395	37.1448		11.6247	38.5525		4.62529	44.0936		12.6252	37.7234		5.62607	41.162		13.6247	22.9221		6.62494	32.7668		14.625	37.8308		7.62379	32.6415		15.6252	27.6133
0.626976	100.725		8.62552	72.9536		1.62644	50.112		9.6254	43.5479		2.62521	41.0218		10.6262	31.5351		3.62534	35.7372		11.6256	36.6885		4.62634	40.3538		12.6262	35.3763		5.62718	39.0446		13.6259	24.5087		6.62626	33.8941		14.6262	32.0421		7.62497	36.0384		15.6263	31.3591
0.628365	95.5685		8.62732	66.0555		1.62755	43.87		9.6272	42.513		2.62688	41.1054		10.6272	32.2926		3.62701	39.3786		11.6272	35.2898		4.62745	48.758		12.6274	34.2758		5.62816	35.427		13.6278	38.5376		6.62813	31.5798		14.628	42.4653		7.62677	38.2572		15.6273	37.2164
0.629198	84.6502		8.62836	67.15		1.62928	49.5066		9.62852	37.9769		2.62792	42.3997		10.6287	32.6505		3.62833	37.0076		11.629	33.6406		4.62911	51.9252		12.6291	39.8438		5.62982	38.4928		13.6293	37.5266		6.62952	27.673		14.6295	46.1335		7.62837	32.3821		15.6288	38.976
0.630309	76.3176		8.6292	66.6102		1.63088	54.5019		9.62942	34.0104		2.62896	44.0966		10.6305	33.3722		3.62923	39.2891		11.6301	30.4316		4.63078	41.9643		12.6307	35.0005		5.63149	34.4906		13.63	31.2398		6.63035	33.7569		14.6303	48.9727		7.62927	30.5599		15.6306	32.6952
0.631976	88.6525		8.63065	60.5322		1.63192	44.5052		9.63088	46.8284		2.63056	44.3471		10.6317	34.3325		3.63055	41.5676		11.6309	33.7181		4.63175	40.5745		12.6316	33.6645		5.63253	30.9714		13.6311	30.0857		6.63146	34.0253		14.6314	35.9012		7.63045	35.5582		15.6319	35.8475
0.633434	98.8133		8.63232	66.64		1.63303	42.6979		9.63269	44.2994		2.6323	43.1512		10.6326	34.8753		3.63229	39.6858		11.6323	39.5426		4.63266	59.1812		12.6328	34.6516		5.63336	34.3623		13.6328	32.898		6.6332	33.9537		14.633	44.2845		7.63226	37.6578		15.6328	37.8427
0.634476	92.0554		8.63357	72.1185		1.6347	46.1157		9.63387	37.9501		2.63341	41.8539		10.6341	34.2788		3.63381	32.0301		11.634	38.9611		4.63418	63.9231		12.6346	33.9209		5.63489	31.1832		13.6343	37.2313		6.63466	35.4091		14.6346	49.1994		7.63378	29.3311		15.6341	35.4121
0.635587	77.6358		8.63454	71.5668		1.63637	35.1526		9.6347	37.7264		2.63438	35.3674		10.6359	46.1216		3.63479	40.3329		11.6353	36.0473		4.63585	47.6665		12.6362	28.6154		5.63656	37.1896		13.6354	35.3196		6.6357	36.3754		14.6356	46.0292		7.63462	30.2646		15.6359	29.3013
0.637254	80.6838		8.63586	65.3487		1.63734	43.9952		9.63595	41.8092		2.63598	35.943		10.6371	42.2864		3.63597	39.7066		11.6362	33.3931		4.63696	43.187		12.637	32.224		5.63774	42.4414		13.6364	32.2956		6.63681	35.3763		14.6367	45.3373		7.63566	33.566		15.6373	32.3612
0.63892	82.1391		8.6376	71.2089		1.63824	46.4497		9.63769	41.171		2.63778	44.3889		10.6378	33.9508		3.63763	41.7227		11.6376	36.0593		4.63793	42.9425		12.638	28.5617		5.63871	29.0329		13.638	31.38		6.63848	35.5851		14.6383	38.1678		7.63733	33.062		15.6382	33.1992
0.640031	85.196		8.63906	75.3752		1.63977	40.9324		9.63908	39.7514		2.63883	45.9308		10.6392	33.408		3.63923	40.5417		11.6393	31.4128		4.63939	47.1475		12.6396	34.5114		5.64017	31.5202		13.6397	28.8212		6.64014	31.3442		14.6401	34.1565		7.63885	32.7071		15.6396	33.1873
0.641004	80.8657		8.64003	63.1119		1.64144	47.0849		9.64005	42.1879		2.63966	40.7833		10.6409	37.8009		3.64027	35.7252		11.6408	34.2758		4.6412	47.5382		12.6412	40.2017		5.64197	34.2192		13.6409	35.1467		6.64126	28.2843		14.6412	46.0978		7.6399	31.386		15.6414	31.374
0.642601	91.0563		8.64121	63.8992		1.64262	48.6715		9.64123	39.7544		2.64112	41.5169		10.6422	35.4002		3.64131	36.8526		11.6417	37.4132		4.64252	40.2584		12.6423	27.8698		5.64336	41.8241		13.6418	32.2121		6.64223	27.4642		14.6421	42.4742		7.64094	33.5481		15.6427	36.8198
0.644337	88.9687		8.64302	67.5347		1.64359	44.544		9.6429	39.2891		2.64278	45.3432		10.6432	28.1979		3.64305	39.3875		11.6429	36.5782		4.64342	50.4072		12.6434	22.4241		5.64427	41.3499		13.6434	26.6023		6.64376	35.5642		14.6436	41.669		7.64253	39.1907		15.6435	39.2086
0.645448	80.3796		8.64454	80.5287		1.64505	40.828		9.64449	42.9067		2.64403	55.167		10.6444	33.7599		3.64472	42.8828		11.6446	33.1306		4.64481	46.4735		12.6449	37.4162		5.64552	37.8755		13.6452	33.6108		6.64549	36.611		14.6454	53.0883		7.64427	48.4747		15.6447	33.8315
0.646351	78.8884		8.64552	66.5237		1.64678	37.0494		9.64553	42.1343		2.64501	53.2404		10.6462	36.9301		3.64569	42.0865		11.6462	40.3389		4.64661	40.1093		12.6466	39.0863		5.64732	49.5185		13.6463	33.2887		6.64667	33.4915		14.6467	40.5715		7.64545	45.8144		15.6464	31.7886
0.647948	76.0403		8.64663	74.7012		1.6481	43.2765		9.64658	35.3226		2.64633	55.9484		10.6478	34.6367		3.64659	32.7787		11.6472	36.1666		4.648	37.6638		12.6478	34.6397		5.64878	43.5389		13.6473	30.536		6.64757	34.3564		14.6476	44.368		7.64642	41.0338		15.6478	36.28
0.649754	93.5734		8.64843	73.8334		1.64901	49.7362		9.64831	36.7034		2.64806	38.0306		10.6488	26.3995		3.64819	46.0828		11.6483	39.2533		4.64891	44.2845		12.6487	30.2855		5.64975	38.3944		13.6488	25.6987		6.64917	33.2648		14.6491	44.8213		7.64788	37.1299		15.6489	32.388
0.650865	102.323		8.65003	62.2828		1.65032	42.519		9.64998	40.4373		2.64952	36.1129		10.6499	25.9552		3.64979	40.4433		11.65	45.6116		4.65023	36.614		12.6502	27.9503		5.651	30.5867		13.6506	31.1504		6.65098	34.3951		14.6509	40.0287		7.64962	40.7654		15.65	29.0061
0.651629	104.483		8.65093	62.7391		1.65213	45.7458		9.65102	37.8725		2.65042	32.1643		10.6516	35.5821		3.6509	35.5165		11.6517	36.3903		4.65203	44.6752		12.652	25.5555		5.65274	33.9001		13.6518	31.8721		6.65209	38.806		14.6521	38.0753		7.65094	36.0086		15.6517	34.1774
0.653087	99.034		8.65191	61.3762		1.65352	50.1		9.65199	33.8166		2.65167	39.0654		10.6532	35.8744		3.65187	35.7044		11.6526	30.196		4.65342	40.0854		12.6533	29.7218		5.6542	42.9723		13.6526	33.2589		6.65292	36.4738		14.6528	36.0682		7.65184	39.8677		15.6534	35.0781
0.654823	86.8482		8.6535	63.9887		1.65442	53.0018		9.65366	37.4282		2.65341	36.3456		10.6542	34.1088		3.6534	38.6091		11.6535	28.1233		4.65425	38.6509		12.6542	29.7487		5.6551	43.7268		13.6539	34.4458		6.65431	35.3703		14.6542	43.19		7.65323	42.7397		15.6544	28.5856
0.656073	95.3568		8.65503	69.7237		1.65574	39.5068		9.6554	44.034		2.65494	38.0037		10.6553	31.5261		3.65513	42.4563		11.6551	31.8363		4.65536	42.2983		12.6556	26.7723		5.65621	38.4332		13.6556	41.833		6.65605	34.2878		14.6559	41.5706		7.6551	34.7709		15.6555	35.8177
0.657045	87.5461		8.65614	75.4647		1.65755	39.7603		9.65637	39.5605		2.65591	41.171		10.6569	35.266		3.65645	35.0304		11.6567	33.9001		4.65703	39.9124		12.6575	37.2969		5.65788	44.2547		13.6569	34.4518		6.6573	46.4169		14.6572	43.5777		7.65635	32.1614		15.6571	32.2717
0.658365	83.3529		8.65718	78.5156		1.659	36.6378		9.6572	40.4224		2.65709	40.5864		10.6586	32.0868		3.65736	37.4073		11.6578	37.4818		4.65856	42.2864		12.6587	36.6647		5.65941	34.9469		13.6579	35.6716		6.65827	47.0611		14.6582	48.8534		7.65719	34.8544		15.6588	36.9957
0.660101	103.218		8.65871	71.7129		1.65977	45.552		9.65873	38.2185		2.65889	47.574		10.6596	28.5975		3.65874	39.1519		11.6588	36.1129		4.65953	47.237		12.6595	32.4387		5.66045	33.9358		13.6592	40.5894		6.65959	37.3834		14.6594	36.9868		7.65844	41.2097		15.6599	36.0861
0.661559	109.571		8.66045	59.5958		1.66088	38.5465		9.6604	36.4529		2.66042	41.2008		10.6605	38.7404		3.66055	39.0595		11.6603	30.6672		4.66064	45.5699		12.6607	29.8202		5.66149	34.8932		13.6609	35.7223		6.66132	38.3855		14.6612	38.797		7.66017	38.0216		15.6609	33.6525
0.662531	92.3238		8.6617	57.9585		1.66262	31.6603		9.66158	35.1616		2.66133	40.7057		10.6621	36.4201		3.66194	35.6745		11.6621	34.8186		4.66231	42.8918		12.6625	34.0641		5.66309	37.3178		13.6624	21.0731		6.66278	30.6941		14.6628	35.6924		7.66156	27.0616		15.6625	31.5888
0.663712	94.2086		8.6626	58.4237		1.66407	35.5046		9.66255	26.829		2.6623	40.9443		10.6637	37.4252		3.66284	35.6388		11.6634	32.567		4.66398	44.5291		12.6639	30.026		5.66482	34.413		13.6634	24.0226		6.66376	35.7103		14.6637	38.29		7.66253	29.6264		15.6643	37.9709
0.665448	87.731		8.66399	59.727		1.66512	38.0067		9.66401	31.6245		2.66396	36.1964		10.6648	37.1627		3.66416	37.8218		11.6643	31.2905		4.66509	43.1363		12.6648	27.5507		5.666	37.6787		13.6645	29.2238		6.66494	36.5603		14.6648	45.6862		7.66372	28.7705		15.6653	35.3763
0.666976	83.1293		8.66579	64.2362		1.66623	39.6112		9.66574	47.2251		2.66549	39.2802		10.6658	30.3362		3.66597	38.7344		11.6657	27.2286		4.66613	42.3042		12.666	31.1474		5.66698	36.5066		13.6663	30.032		6.66667	37.0822		14.6666	39.0416		7.66545	34.9081		15.6662	33.2797
0.667948	104.017		8.66711	67.3886		1.66789	38.296		9.66713	42.5339		2.6666	46.3274		10.6673	29.5817		3.66736	42.3042		11.6674	31.0967		4.66766	51.0126		12.6677	38.7672		5.66843	32.0719		13.6679	27.0049		6.66827	33.1843		14.6682	41.3588		7.66705	32.2747		15.6676	32.4328
0.669128	97.2237		8.66809	67.0396		1.66956	50.2551		9.66804	34.6695		2.66764	52.1429		10.669	32.2031		3.66812	42.8858		11.6688	28.2277		4.66946	51.5852		12.6693	39.3965		5.67024	39.5963		13.6689	30.3571		6.66924	40.0108		14.6692	44.1831		7.66802	33.1873		15.6693	31.55
0.670865	86.1474		8.66947	69.515		1.6706	49.6467		9.66935	33.6883		2.66917	34.3534		10.6703	35.3703		3.6693	35.931		11.6697	27.1093		4.67064	51.8984		12.6703	35.0125		5.67142	34.6009		13.6699	33.2648		6.67035	42.9544		14.6703	42.5548		7.66906	41.3857		15.6705	30.6285
0.672462	94.134		8.67128	78.4649		1.67164	43.9505		9.67109	33.1485		2.67091	41.6571		10.6713	32.9726		3.67097	33.6615		11.671	35.5165		4.67154	48.2689		12.6714	32.9308		5.67239	37.1299		13.6717	35.3107		6.67209	40.3598		14.672	33.8911		7.67073	39.8647		15.6715	37.965
0.673365	98.2079		8.6726	66.7474		1.67317	44.2845		9.67262	31.1623		2.67216	39.641		10.6726	31.049		3.67242	42.4563		11.6729	37.0971		4.67314	32.4447		12.6731	36.3963		5.67385	39.0386		13.6734	31.6037		6.67369	43.2735		14.6737	39.7901		7.6724	32.1345		15.6729	33.0173
0.674337	99.025		8.67336	73.72		1.67491	39.984		9.67352	38.8		2.67306	38.8716		10.6744	29.525		3.67347	47.6098		11.6742	39.0505		4.67488	35.0542		12.6748	31.5738		5.67566	37.3983		13.6743	32.9576		6.67459	35.8177		14.6746	44.6066		7.67351	39.5695		15.6747	26.7723
0.675934	86.893		8.67461	68.665		1.67609	38.126		9.67477	33.8762		2.67445	43.2675		10.6758	38.46		3.67458	37.9202		11.6751	37.0822		4.67599	38.5406		12.6758	30.2169		5.67684	36.7691		13.6752	32.7071		6.67556	34.6814		14.6755	45.4208		7.67448	37.3566		15.6761	32.6863
0.677531	94.7126		8.67628	84.7994		1.67699	42.0329		9.67658	31.0967		2.67626	39.7037		10.6767	37.1001		3.67624	33.5959		11.6762	27.7565		4.67682	40.7743		12.6769	34.3742		5.67767	32.4835		13.6768	32.0122		6.67716	33.9388		14.6771	45.5699		7.67615	43.3868		15.677	33.8016
0.678573	88.6823		8.67774	75.7301		1.67859	43.4554		9.67803	38.7911		2.67758	41.2187		10.6781	33.7659		3.67791	38.1409		11.6779	27.9175		4.67821	56.8431		12.6785	34.4965		5.67899	35.0184		13.6784	29.0747		6.67875	39.8975		14.6787	46.3065		7.67788	35.7252		15.6782	36.6438
0.679615	93.636		8.67871	65.453		1.68039	39.7245		9.67887	37.1329		2.67848	37.6399		10.6799	35.9966		3.67895	40.5089		11.6794	37.962		4.67988	49.0741		12.6802	28.8391		5.68066	32.1703		13.6795	27.5537		6.67987	36.3843		14.6798	47.8156		7.67892	39.3637		15.68	31.541
0.681142	82.2674		8.67989	64.4092		1.68151	48.248		9.67991	32.2747		2.67987	32.8801		10.6813	30.2825		3.67999	35.0274		11.6804	35.4061		4.6812	35.1616		12.6812	22.3197		5.68197	33.5303		13.6805	28.1501		6.68084	33.8255		14.6808	44.702		7.67976	36.4231		15.6816	30.9028
0.682879	95.6938		8.68156	75.8136		1.68234	44.6483		9.68158	36.1517		2.68174	40.6252		10.6821	34.073		3.68159	35.5105		11.6815	37.7711		4.68217	44.2487		12.6821	25.0634		5.68295	46.9537		13.682	39.8021		6.68237	24.6996		14.6823	45.0182		7.68128	34.5949		15.6825	35.8624
0.684129	100		8.68316	78.3725		1.68373	41.9732		9.6831	40.5745		2.68306	38.0664		10.6832	38.1678		3.68333	33.3125		11.6831	35.8863		4.68349	42.859		12.6836	28.7913		5.6842	44.1354		13.6837	29.4325		6.68417	28.9405		14.6841	40.5745		7.68295	34.0223		15.6837	40.3329
0.685031	95.8966		8.6842	81.826		1.68539	41.0934		9.68408	50.2163		2.68383	42.0865		10.6849	31.5381		3.68444	35.9191		11.6848	30.4257		4.68523	39.2593		12.6853	36.6498		5.68593	33.1396		13.685	27.3837		6.68542	37.5295		14.6854	37.9381		7.68413	33.6406		15.6855	37.6727
0.68649	78.6588		8.68524	83.7734		1.68671	43.2377		9.68519	40.7445		2.68501	43.8073		10.6863	24.5893		3.68541	41.672		11.6859	40.5715		4.68668	43.2377		12.6864	34.1536		5.68753	30.5688		13.6859	32.4238		6.68633	35.2421		14.6863	41.0069		7.6851	38.6927		15.687	33.9746
0.688226	89.0104		8.68684	78.6498		1.68762	43.9475		9.68678	31.4516		2.68674	46.4169		10.6874	31.2339		3.68701	34.5532		11.6869	34.6099		4.68766	38.2483		12.6874	27.0735		5.6885	27.661		13.6873	30.6404		6.68771	31.1504		14.6876	38.5644		7.68656	36.5543		15.6878	40.4999
0.689545	101.077		8.68857	67.6659		1.68894	45.6206		9.68852	27.2644		2.68813	43.527		10.6885	35.0244		3.68874	36.0503		11.6885	32.8861		4.68884	46.5123		12.6888	32.1077		5.68961	37.6876		13.6891	27.8817		6.68952	28.7794		14.6894	45.6295		7.6883	34.1536		15.6888	42.2118
0.690448	96.9016		8.68968	73.4218		1.69067	51.7821		9.68963	34.6993		2.6891	41.3559		10.6901	34.3623		3.68986	37.2522		11.6902	38.9372		4.69057	48.3882		12.6906	38.9909		5.69128	37.5832		13.6905	33.2559		6.69084	29.5489		14.6909	43.36		7.68969	40.6133		15.6905	37.118
0.691837	85.6941		8.69065	67.3379		1.6922	52.5724		9.69061	34.4279		2.69028	50.1716		10.6918	34.8902		3.69069	42.4534		11.6913	32.6445		4.69217	48.6089		12.692	32.6475		5.69295	39.808		13.6914	34.9141		6.69181	34.1923		14.6918	32.8234		7.69059	35.3077		15.6921	29.695
0.693642	86.1474		8.69225	68.7694		1.6931	45.6295		9.69213	33.0978		2.69202	42.0955		10.6929	36.3873		3.69208	40.8369		11.6923	32.9129		4.69314	46.9388		12.6929	33.1694		5.69399	32.0421		13.6927	29.3192		6.6932	34.3355		14.6931	36.4589		7.69184	29.4146		15.6931	35.7252
0.694962	99.4426		8.69406	72.372		1.69428	39.6052		9.69387	31.9228		2.69362	36.5991		10.6939	36.4977		3.69381	39.3488		11.6939	32.3015		4.69425	41.1561		12.6941	32.9398		5.69503	37.4788		13.6945	30.0022		6.69501	33.9567		14.6949	40.3061		7.69358	35.4181		15.6941	28.8033
0.695726	95.5984		8.6951	61.0124		1.69602	41.5378		9.69512	32.6713		2.69466	42.3788		10.6954	30.6046		3.69506	44.878		11.6956	32.0033		4.69599	44.0728		12.6959	26.2743		5.69677	43.1512		13.696	34.8216		6.69632	36.6259		14.6963	44.4396		7.6951	33.3722		15.6957	33.736
0.696976	101.494		8.69593	65.3397		1.69762	44.705		9.69602	29.4803		2.69563	52.2324		10.6972	31.7588		3.69604	39.984		11.6967	34.1446		4.69766	46.0381		12.6974	28.8033		5.69843	40.5178		13.6968	31.4009		6.69716	38.5823		14.6971	37.6339		7.69601	35.8296		15.6975	41.1739
0.698642	101.041		8.69739	79.4521		1.69859	43.6552		9.69755	42.0985		2.6973	51.621		10.6983	30.8253		3.69736	29.1433		11.6975	30.4644		4.69856	46.0172		12.6983	37.2999		5.69941	39.5217		13.6979	34.3444		6.69834	31.7916		14.6983	33.4736		7.69726	37.0524		15.6987	46.5391
0.700101	96.4692		8.69906	70.8391		1.6997	44.1652		9.69935	48.5522		2.69903	41.162		10.6992	26.9781		3.69909	35.5105		11.699	30.5271		4.69946	43.3451		12.6995	36.7243		5.70031	38.9402		13.6996	34.8276		6.70007	30.8998		14.6999	39.5903		7.69906	38.9551		15.6996	31.7617
0.701073	96.3052		8.70024	70.2904		1.70144	37.0941		9.70053	39.984		2.70014	41.4364		10.7008	38.9939		3.70055	42.2178		11.7006	27.7416		4.70106	45.6743		12.7013	30.8491		5.70184	32.048		13.7011	29.5041		6.70153	32.9547		14.7014	45.6504		7.70052	38.3348		15.7011	35.5403
0.702254	86.4486		8.70121	82.5149		1.70303	41.6392		9.7013	40.8548		2.70112	41.4066		10.7026	39.5068		3.70145	45.2896		11.7019	27.0049		4.70272	46.7419		12.7028	29.9276		5.70343	39.5844		13.702	36.1607		6.70257	30.6821		14.7024	48.1138		7.70135	35.8773		15.7028	34.5562
0.70392	79.4342		8.7026	88.5571		1.70394	43.0021		9.70262	37.291		2.70271	39.3637		10.7037	38.2393		3.70263	37.8009		11.7028	25.8209		4.70377	39.3637		12.7037	32.6475		5.70461	38.305		13.7031	30.1125		6.70369	30.4376		14.7035	50.4042		7.70247	36.7691		15.7041	33.4438
0.705518	76.4817		8.7044	73.8095		1.70491	49.93		9.70435	33.0382		2.70445	43.3093		10.7045	36.9331		3.70444	31.6544		11.7042	34.577		4.70474	43.9684		12.7047	28.0726		5.70559	37.7741		13.7048	35.2988		6.70542	33.1962		14.7051	41.9613		7.70413	35.2809		15.705	36.9808
0.706559	88.0292		8.70579	69.002		1.70651	45.8204		9.70567	37.5534		2.70549	48.6805		10.7059	26.3548		3.70597	32.2508		11.706	34.3623		4.70627	50.0881		12.7064	26.8051		5.70704	41.9762		13.7065	39.2414		6.70702	33.9985		14.7069	40.7892		7.70566	38.5167		15.7065	36.1129
0.707601	103.036		8.70677	72.1543		1.7081	50.8695		9.70665	37.3387		2.70639	44.7855		10.7076	26.5337		3.70694	37.8457		11.7074	31.5888		4.70807	42.4444		12.708	26.0566		5.70885	35.6089		13.7076	32.9905		6.70806	34.589		14.708	40.7445		7.7067	37.4729		15.7083	37.9262
0.709267	104.82		8.70795	75.8226		1.70921	53.142		9.7079	39.0982		2.70785	50.6249		10.7089	29.6592		3.70812	38.5674		11.7083	35.8177		4.70939	42.2058		12.7089	29.3013		5.71017	31.7856		13.7086	33.4617		6.7091	34.4727		14.7089	44.4724		7.70774	34.2729		15.7096	30.7
0.710934	97.0865		8.70975	77.767		1.71019	47.2519		9.70963	31.7081		2.70945	45.0629		10.7099	27.0258		3.70986	42.2893		11.7095	38.3527		4.71029	48.1854		12.71	36.6378		5.71107	36.7929		13.7102	30.9505		6.71077	29.859		14.7105	42.6383		7.70934	34.756		15.7104	27.9503
0.712045	97		8.71128	76.085		1.71171	43.0021		9.71123	43.1333		2.71063	41.4662		10.7111	32.4924		3.71145	40.151		11.7112	29.4862		4.71168	44.9108		12.7116	37.5594		5.71239	38.6062		13.7119	34.0343		6.7125	23.459		14.7123	46.0053		7.71108	34.5055		15.7116	34.9588
0.713017	85.1602		8.71218	68.9632		1.71345	47.4338		9.7122	38.9849		2.7116	36.1607		10.7128	36.0265		3.71235	38.5674		11.7128	32.7519		4.71349	40.497		12.7133	33.0412		5.7142	40.3926		13.7131	33.3096		6.71362	30.3213		14.7135	46.733		7.71219	37.4878		15.7133	37.6548
0.714684	92.6727		8.71343	69.8728		1.71477	48.3345		9.71324	39.0565		2.71299	42.8172		10.7144	31.8273		3.71333	40.834		11.7137	31.7916		4.71481	43.6165		12.7145	39.6023		5.71566	34.6427		13.714	32.5192		6.71452	39.0595		14.7144	45.5908		7.71316	33.5124		15.7147	33.3782
0.71642	82.7833		8.71524	85.3093		1.7156	44.368		9.71498	27.7505		2.7148	40.5894		10.7153	30.2676		3.71492	43.6731		11.7149	32.2866		4.71571	46.5362		12.7154	33.4467		5.71656	35.5791		13.7156	41.4752		6.71612	36.7452		14.716	37.4938		7.71469	25.3557		15.7157	34.75
0.717462	91.9689		8.71677	79.5207		1.71699	43.3451		9.71665	38.3079		2.71619	35.761		10.7165	38.0187		3.71652	50.4102		11.7167	38.2513		4.71703	47.5084		12.7169	31.9258		5.71781	36.2382		13.7174	42.677		6.71792	26.2713		14.7177	36.3515		7.71649	26.6471		15.7169	39.7126
0.718295	94.1639		8.7176	71.2924		1.71887	33.402		9.71762	48.3405		2.71709	40.5149		10.7183	34.92		3.71763	44.2875		11.7183	39.5307		4.71891	41.4006		12.7187	38.0067		5.71961	34.8693		13.7185	34.917		6.71896	32.391		14.7189	45.7101		7.71767	31.2846		15.7186	32.2091
0.719754	88.4139		8.71864	71.9038		1.72019	52.2831		9.71866	45.4178		2.71834	43.5031		10.7198	30.7806		3.71867	45.4417		11.7192	34.7918		4.72023	44.9585		12.7199	32.3194		5.72107	35.7193		13.7193	32.6713		6.7198	34.9469		14.7196	47.4965		7.71858	27.1362		15.7202	35.0423
0.72142	92.5713		8.72031	70.9703		1.72102	46.4646		9.7204	43.6254		2.72014	48.2957		10.7208	36.784		3.7202	38.8448		11.7202	37.5146		4.72106	48.6805		12.7208	42.2893		5.72191	36.7541		13.7206	35.9907		6.72125	35.4688		14.721	34.586		7.7201	34.2132		15.7212	36.5394
0.72267	86.7379		8.72184	73.4039		1.72241	44.4217		9.72206	42.7635		2.72167	36.0175		10.7219	35.5881		3.72194	34.3325		11.7217	34.8395		4.72224	42.7158		12.7223	37.5594		5.72302	35.3495		13.7224	36.1517		6.72292	33.0083		14.7227	28.9971		7.72191	31.4039		15.7223	34.0969
0.723642	81.7127		8.72288	79.9948		1.72428	49.0652		9.72303	41.4006		2.72258	31.6603		10.7237	37.2701		3.72319	33.2082		11.7233	30.9207		4.72391	50.7054		12.7241	30.3064		5.72468	38.9044		13.7236	28.687		6.72417	40.822		14.724	30.536		7.72316	34.583		15.7239	32.558
0.724962	90.8922		8.72392	72.2468		1.7256	50.5325		9.72394	38.0634		2.72376	32.6356		10.7253	30.5748		3.72409	33.1932		11.7244	36.3724		4.72536	45.9993		12.7254	18.1027		5.72621	42.6651		13.7246	35.5552		6.72514	37.8964		14.7249	33.3662		7.72392	31.38		15.7257	36.2263
0.726767	99.2219		8.72545	80.3676		1.72644	49.9628		9.72546	42.522		2.72556	39.8379		10.7262	33.3334		3.72548	44.4575		11.7255	29.8829		4.72634	47.6038		12.7262	31.5947		5.72725	42.5398		13.7259	34.9498		6.72646	41.2425		14.7262	32.0958		7.72531	27.7833		15.7267	38.1379
0.728156	99.2606		8.72718	85.2497		1.72762	38.2095		9.72713	47.2609		2.72709	42.8351		10.7272	33.0561		3.72729	39.653		11.727	35.3465		4.72745	48.3464		12.7275	37.9083		5.72829	35.8326		13.7277	38.9312		6.72827	42.9276		14.728	43.0468		7.72698	31.4546		15.7277	36.0324
0.729129	93.9044		8.72836	79.1777		1.72928	39.2474		9.72824	41.7853		2.72799	35.5642		10.7288	32.9308		3.72861	26.9334		11.7287	31.7021		4.72918	42.859		12.7291	28.6363		5.72996	33.402		13.7291	41.1859		6.72966	32.4924		14.7295	41.8241		7.72837	31.4605		15.7294	42.6979
0.730379	96.0308		8.72933	79.2373		1.73074	45.2836		9.72922	43.3928		2.72896	48.081		10.7303	27.8221		3.72951	35.3018		11.73	31.6186		4.73085	52.6201		12.7305	25.3259		5.73163	41.4513		13.7301	40.4642		6.73063	33.5631		14.7305	46.1186		7.72934	31.5828		15.7312	37.0643
0.732115	101.151		8.73079	75.6436		1.73171	37.5176		9.73067	40.8131		2.73063	39.6351		10.7314	31.4068		3.7309	38.6956		11.7309	34.5532		4.73189	43.533		12.7315	32.5521		5.73274	31.4963		13.7313	34.3027		6.73181	45.1106		14.7317	45.7071		7.73059	35.0214		15.7321	39.8498
0.733642	86.2726		8.7326	68.2326		1.73289	38.4183		9.73248	36.8466		2.73223	39.9751		10.7324	32.8026		3.73277	37.9113		11.7324	37.7771		4.73293	41.7973		12.7328	29.9395		5.73371	27.4344		13.733	27.2047		6.73355	37.0762		14.7334	39.4889		7.73233	34.6844		15.733	44.6454
0.734545	92.9471		8.73385	68.8857		1.73456	40.2136		9.7338	36.6736		2.73327	32.5252		10.734	33.9537		3.73409	41.4364		11.7341	35.764		4.73453	37.6787		12.7344	33.0441		5.73531	31.4367		13.7346	37.3506		6.73507	30.4465		14.735	36.5842		7.73385	28.4215		15.7345	38.8418
0.735726	98.7447		8.73475	70.3232		1.73623	49.4171		9.7347	32.5103		2.73431	37.3208		10.7357	33.4259		3.73485	50.5921		11.7354	44.4306		4.73627	31.9973		12.736	27.667		5.73704	36.6438		13.7356	41.2753		6.73605	30.4704		14.736	41.7674		7.73483	34.1923		15.7362	41.5348
0.737531	93.4063		8.73628	77.5165		1.73727	47.5651		9.73602	28.1233		2.73591	39.6082		10.7369	26.1192		3.7361	41.7823		11.7363	34.7858		4.73738	42.7456		12.737	27.9354		5.73822	34.9558		13.7367	36.7482		6.73723	29.7367		14.7371	45.2925		7.73594	27.664		15.7373	42.006
0.739129	80.3945		8.73808	73.2488		1.73831	43.4823		9.73776	40.1391		2.73758	35.1675		10.7379	32.224		3.73777	44.7229		11.7377	34.3742		4.73835	49.602		12.7381	35.6745		5.7392	37.2582		13.7384	26.6828		6.73903	30.7686		14.7388	43.5986		7.73767	26.9274		15.7383	48.8147
0.739962	86.2756		8.73927	66.3626		1.73991	35.3763		9.73922	45.3641		2.73876	34.5353		10.7393	38.9283		3.73916	51.3258		11.7396	35.2868		4.73995	51.1289		12.7398	36.3545		5.74073	36.1726		13.7401	29.1492		6.74056	33.1127		14.7405	47.5203		7.73934	36.1189		15.7397	46.5213
0.740934	87.4178		8.7401	64.4778		1.74164	32.4924		9.74019	44.4784		2.73973	41.0338		10.741	32.4536		3.74013	36.5215		11.7409	27.0258		4.74168	38.0753		12.7414	34.4428		5.74253	32.6415		13.741	31.6693		6.74146	32.8026		14.7414	49.4618		7.74038	33.915		15.7415	36.2024
0.742601	93.2721		8.74135	60.0849		1.74276	38.3497		9.74144	41.168		2.74119	40.0735		10.7424	34.2758		3.74131	37.3089		11.7417	23.2412		4.74279	42.9961		12.7425	30.2706		5.74364	30.9833		13.7419	33.2768		6.74244	36.951		14.7423	40.3031		7.74142	39.8558		15.7429	36.0205
0.744129	86.7021		8.74309	74.9458		1.74366	40.1928		9.74324	36.6706		2.74299	44.7348		10.7433	31.4963		3.74298	42.3669		11.7429	32.1673		4.74363	42.1909		12.7435	32.8324		5.74447	35.5642		13.7435	37.9262		6.7441	38.4839		14.7439	42.2058		7.74309	28.7317		15.7438	41.6332
0.74517	87.0301		8.74447	85.5509		1.74525	41.9106		9.7447	30.539		2.74424	46.0978		10.7447	32.3463		3.74465	43.7387		11.7446	33.1604		4.74502	45.0689		12.7452	36.9719		5.74586	38.7255		13.7452	36.9092		6.74563	34.3086		14.7455	43.3868		7.74483	27.9295		15.745	39.2146
0.746212	91.0414		8.74545	68.1073		1.74706	39.7454		9.74547	39.6977		2.74514	40.3091		10.7465	34.6158		3.74569	36.8883		11.746	43.3242		4.74675	55.2684		12.7469	32.0749		5.74753	39.0893		13.7463	30.7895		6.74674	29.7457		14.7467	42.6084		7.7458	28.508		15.7468	34.6009
0.74774	82.324		8.74663	73.8572		1.74817	41.1889		9.74658	41.2783		2.74653	44.4634		10.7478	31.8721		3.74673	33.7181		11.747	40.7475		4.74793	49.1397		12.7479	35.7073		5.74878	39.5068		13.7472	37.2939		6.74778	29.686		14.7476	38.7941		7.7467	26.2564		15.7483	31.0669
0.749476	78.5156		8.74843	60.3712		1.74894	38.2095		9.74831	34.7769		2.74841	48.7968		10.7487	35.4479		3.7484	32.1017		11.7482	33.0889		4.74891	51.6956		12.7488	47.9647		5.74975	34.1237		13.7488	33.4945		6.74938	36.101		14.7491	46.4109		7.74823	23.9749		15.7492	33.8344
0.750726	82.0377		8.74996	79.7205		1.75039	35.6954		9.74977	28.1531		2.74966	39.9512		10.7499	38.0843		3.75006	42.4981		11.7499	35.0363		4.75029	47.917		12.7503	35.6984		5.75107	37.0404		13.7505	31.893		6.75112	36.8675		14.7509	54.5497		7.74983	32.5043		15.7505	30.7865
0.751698	102.541		8.75093	81.8916		1.75206	31.0788		9.75081	35.6895		2.75042	38.123		10.7515	42.176		3.75117	42.2297		11.7515	30.4197		4.7521	43.7358		12.7519	37.8069		5.75281	33.906		13.7518	30.879		6.75237	34.3564		14.7522	43.8908		7.75101	28.5826		15.7523	36.4261
0.753156	100.653		8.75197	72.2766		1.75331	36.9957		9.75192	32.1972		2.75174	37.6071		10.753	36.7571		3.75215	32.6475		11.7526	29.3431		4.75349	45.7846		12.7531	25.4392		5.75427	38.2036		13.7527	34.7321		6.75327	34.0402		14.753	39.9691		7.75198	32.5163		15.7538	32.4298
0.754892	86.1593		8.75371	68.9274		1.75435	39.4353		9.75352	32.4298		2.75348	42.7277		10.754	40.16		3.75374	44.9645		11.7535	31.3889		4.75439	40.5208		12.7541	25.0157		5.75531	37.9351		13.754	33.5213		6.75473	31.207		14.7544	38.9611		7.75344	45.1583		15.7546	31.8303
0.756212	86.9168		8.75545	65.2264		1.75567	42.8053		9.75526	35.4867		2.7548	52.4412		10.7551	35.5105		3.75555	48.0959		11.7552	30.7269		4.75564	38.8865		12.7555	28.9226		5.75649	33.0054		13.7559	35.263		6.75653	28.2187		14.7562	38.3557		7.75524	45.6922		15.7557	32.7459
0.757115	81.8111		8.75642	76.5085		1.75741	40.1778		9.75637	39.1639		2.75577	47.4786		10.7567	28.5378		3.75659	38.7553		11.7569	33.8106		4.75738	47.6575		12.7573	37.3029		5.75816	28.5736		13.7572	30.712		6.75785	33.8971		14.7576	39.6679		7.75656	38.5734		15.7573	33.6674
0.758573	76.5353		8.75746	78.6647		1.75887	44.3561		9.75727	34.6307		2.75702	46.4765		10.7584	32.0361		3.75742	42.7248		11.758	33.1634		4.75891	51.8447		12.7586	39.0625		5.75975	23.9272		13.7581	35.0453		6.75869	31.8512		14.7585	45.1792		7.75747	25.7345		15.7589	35.0781
0.760379	80.5496		8.75913	71.3491		1.75977	48.6029		9.75887	34.4071		2.75869	46.2021		10.7594	28.8957		3.75888	39.7663		11.759	29.7397		4.75988	47.6814		12.7595	43.8849		5.76079	31.4754		13.7595	34.079		6.76008	39.5217		14.7598	53.8816		7.75878	28.1233		15.7599	31.4844
0.761629	80.0276		8.76086	71.0449		1.76095	49.9479		9.7606	41.0636		2.76028	48.8415		10.7605	28.9822		3.76062	40.0556		11.7606	32.5371		4.76106	49.7899		12.7608	35.594		5.76184	34.3534		13.7613	29.8381		6.76195	36.1994		14.7617	48.5731		7.76059	36.7094		15.7609	32.4328
0.762393	90.3942		8.76184	63.4608		1.76275	45.6623		9.76179	44.2338		2.76126	46.2618		10.7621	36.6885		3.7618	46.7688		11.7624	35.0811		4.76286	42.2028		12.7626	33.3632		5.76357	34.1446		13.7627	31.2667		6.76327	34.6665		14.763	37.4222		7.76205	36.2919		15.7625	42.4146
0.763642	96.4125		8.76267	58.3223		1.76428	48.2391		9.76276	36.0473		2.76237	45.8025		10.7638	37.3566		3.7627	43.6523		11.7634	30.5092		4.76439	40.9771		12.764	30.1304		5.76524	31.6365		13.7635	30.0081		6.76403	38.6658		14.7639	36.6557		7.76295	32.1196		15.7643	39.486
0.765379	105.067		8.7642	67.7703		1.76526	49.9718		9.76429	43.1423		2.76403	42.4444		10.765	29.2745		3.76409	44.4038		11.7642	38.2543		4.76522	40.8459		12.765	22.8088		5.76614	33.6824		13.7647	37.6518		6.76528	36.8019		14.7651	38.8746		7.7642	26.996		15.7655	37.6727
0.766767	97.0478		8.76586	60.5918		1.76644	45.7906		9.76609	36.8198		2.7657	44.5947		10.7659	33.235		3.7659	37.0613		11.7657	27.0049		4.76627	49.1874		12.7662	25.7524		5.76711	33.0412		13.7663	40.1689		6.76702	37.8576		14.7667	37.2492		7.76601	24.7443		15.7664	30.7656
0.76774	95.2971		8.76704	57.7825		1.76817	41.8151		9.76727	38.2125		2.76674	36.4052		10.7675	37.9232		3.76729	35.4509		11.7674	31.5589		4.76793	46.8672		12.768	31.037		5.76871	27.3509		13.7678	40.3717		6.76841	30.8193		14.7681	36.9897		7.76747	32.8205		15.7679	29.6204
0.76892	98.5896		8.76809	65.9749		1.7697	47.4547		9.7681	40.315		2.76778	30.1692		10.7693	32.8055		3.76819	41.7883		11.7686	31.2637		4.76946	50.2581		12.7695	36.9987		5.77031	29.4832		13.7688	36.8287		6.76938	33.3573		14.7692	40.6998		7.7683	34.1178		15.7697	36.3605
0.770656	96.7406		8.76947	73.7677		1.7706	53.1867		9.76942	47.9886		2.76945	33.2618		10.7703	27.5268		3.76944	35.0781		11.7696	35.6179		4.77057	42.6442		12.7703	29.6413		5.77142	30.6374		13.7699	29.3729		6.77063	31.5261		14.7703	36.9629		7.76941	39.6142		15.7709	41.2097
0.772254	99.198		8.77121	61.91		1.77157	49.1546		9.77109	38.0843		2.77119	43.3868		10.7712	31.1176		3.77124	35.099		11.7709	35.4598		4.77161	41.7466		12.7714	35.6686		5.77239	40.2345		13.7716	27.0139		6.7723	28.4842		14.7719	43.5777		7.77108	37.4938		15.7718	40.6491
0.773295	89.0253		8.7726	63.5503		1.77324	49.0652		9.77241	38.9283		2.77216	42.3162		10.7726	37.9918		3.77277	36.6378		11.7727	33.2231		4.77314	38.3109		12.7731	38.4839		5.77392	42.4325		13.7732	34.4876		6.77389	32.8026		14.7736	51.4272		7.7726	38.9163		15.7734	33.1097
0.774337	94.4024		8.7735	59.7329		1.77477	46.3751		9.77338	35.3912		2.77299	40.5149		10.7743	40.7833		3.77367	44.547		11.7741	32.7399		4.77488	43.8461		12.7746	30.4018		5.77565	36.1368		13.7743	34.9558		6.77494	31.9138		14.7747	47.6128		7.77358	37.4341		15.7752	27.9563
0.776004	92.3297		8.77482	67.0963		1.77588	47.1416		9.77463	38.293		2.77452	43.5926		10.7756	35.0214		3.77485	41.8092		11.7751	38.5913		4.77613	48.2808		12.7757	35.591		5.77697	37.2403		13.7753	30.536		6.77598	29.2775		14.7758	38.135		7.77469	38.0097		15.7764	37.1657
0.77767	93.7254		8.77656	69.1809		1.77692	52.7304		9.77637	37.9829		2.77619	42.5846		10.7765	40.2822		3.77666	33.6466		11.7762	37.7622		4.77703	49.3127		12.7767	36.5633		5.77788	33.1724		13.777	32.385		6.77764	29.0389		14.7773	38.5614		7.77635	32.385		15.7771	43.7566
0.778712	96.0099		8.77802	65.6946		1.77845	51.8894		9.7779	40.8817		2.77737	42.2297		10.7778	36.8227		3.77819	39.304		11.7781	34.5353		4.77842	50.6398		12.7784	32.2419		5.77927	25.475		13.7786	36.3008		6.77938	36.5633		14.779	39.7544		7.77802	30.0469		15.7785	45.0092
0.779754	92.2581		8.77899	59.9596		1.78026	52.4948		9.77887	43.026		2.77834	39.5545		10.7796	26.6828		3.77909	34.6695		11.7796	34.5174		4.78023	47.7589		12.7801	29.3013		5.78107	25.9671		13.7797	35.8624		6.78042	42.6562		14.7802	38.4332		7.77913	30.2825		15.7802	41.1083
0.78142	91.6319		8.78024	68.1461		1.78144	50.8128		9.78005	41.2575		2.7798	30.6523		10.781	37.5504		3.78006	36.0861		11.7805	35.9877		4.78154	37.8904		12.7812	33.8106		5.78246	31.1802		13.7807	37.0703		6.78139	37.291		14.7812	42.2893		7.7801	34.1297		15.7815	41.4304
0.783087	83.3052		8.78204	67.1798		1.78234	49.3395		9.78178	38.6032		2.78153	42.0657		10.782	41.4841		3.78173	39.0147		11.7817	38.2274		4.78245	43.0826		12.7821	29.0001		5.78336	31.4188		13.7823	33.7509		6.78306	39.3816		14.7828	35.1646		7.78163	43.9415		15.7825	35.099
0.784128	78.7572		8.7835	70.2755		1.7838	40.3806		9.78338	32.048		2.78292	48.1735		10.7832	39.5426		3.78333	40.2971		11.7835	35.9608		4.78384	42.4235		12.7837	31.1414		5.78468	41.4036		13.7841	30.4018		6.7848	33.906		14.7845	37.2939		7.78344	37.0226		15.7837	31.5172
0.784962	94.8021		8.78434	65.5306		1.7856	46.0113		9.78436	34.085		2.78383	40.0347		10.785	36.7929		3.78437	37.112		11.785	30.6314		4.78571	39.9542		12.7855	34.9051		5.78656	42.2655		13.7852	37.7473		6.78577	36.6706		14.7856	43.5002		7.78462	39.8617		15.7855	37.115
0.78642	103.156		8.78538	60.2041		1.78692	43.3033		9.78547	38.2841		2.78508	37.9918		10.7865	33.9687		3.78541	33.1932		11.7859	36.5692		4.78696	39.7693		12.7866	35.9817		5.78788	32.9815		13.786	40.2614		6.78667	40.6252		14.7864	39.7484		7.78552	48.3971		15.7871	36.951
0.788087	98.1095		8.78711	67.7047		1.78776	36.4171		9.7872	39.1937		2.78688	39.653		10.7875	32.4417		3.78694	26.5934		11.7869	33.0859		4.78773	51.7821		12.7876	38.9432		5.78871	32.7131		13.7874	36.8108		6.78813	40.1122		14.7878	41.9822		7.78705	47.4338		15.788	28.8301
0.789267	97.3549		8.78864	63.8098		1.78921	43.4345		9.7888	41.669		2.78834	45.6743		10.7886	33.9329		3.78867	28.7645		11.7885	31.0519		4.78898	50.6428		12.7891	39.9094		5.78982	38.4332		13.7892	32.1435		6.7898	31.0967		14.7895	45.2448		7.78885	37.7383		15.7891	31.4933
0.79024	87.731		8.78961	62.7242		1.79102	44.8392		9.7897	34.7858		2.78924	51.5196		10.7904	39.3846		3.78986	36.3605		11.7901	36.8287		4.79071	54.7346		12.7909	35.5105		5.79156	28.3052		13.7904	34.3653		6.79098	29.4803		14.7907	35.3525		7.78997	30.0588		15.7909	36.6826
0.791698	87.1793		8.79072	71.1701		1.79227	46.1723		9.79067	32.7042		2.79049	47.0998		10.7919	42.0269		3.79083	31.6872		11.7911	37.628		4.7921	46.7211		12.7921	33.3096		5.79302	33.0292		13.7913	40.0615		6.79195	34.8842		14.7917	32.0033		7.7908	34.6069		15.7925	40.667
0.793434	92.6727		8.79232	69.6432		1.7931	51.0544		9.79227	34.9707		2.7923	34.4876		10.7928	31.8602		3.79229	31.4963		11.7922	34.5383		4.79307	46.2499		12.7928	38.6062		5.79399	32.3343		13.7927	31.6544		6.79341	32.0659		14.793	40.7803		7.79219	37.5892		15.7935	34.0522
0.794823	88.3931		8.79406	62.7958		1.79435	51.0186		9.7938	39.647		2.79376	34.7441		10.7938	40.3329		3.79409	31.714		11.7937	30.1572		4.79425	53.5953		12.7942	44.8154		5.79517	39.0744		13.7945	40.7057		6.79514	32.731		14.7948	44.4873		7.79385	44.0429		15.7946	35.0512
0.795726	81.6292		8.79517	69.2018		1.79602	33.0441		9.79491	38.1857		2.79459	42.9753		10.7954	34.58		3.79534	37.8666		11.7955	29.8292		4.79592	55.9185		12.7959	36.945		5.79684	35.2332		13.7959	33.0292		6.79653	37.3059		14.7962	38.7672		7.79517	41.3529		15.7963	46.7539
0.797045	83.4156		8.79607	73.8811		1.79748	44.0221		9.79595	28.0159		2.7957	45.6951		10.7969	28.7049		3.79624	36.2173		11.7967	34.8097		4.79752	42.7516		12.7972	32.4328		5.7985	38.642		13.7968	28.1352		6.79751	34.2818		14.7971	37.2343		7.79615	37.6608		15.798	42.003
0.798781	85.4048		8.79767	68.1759		1.79845	50.6548		9.79741	32.3493		2.79737	43.36		10.7981	29.865		3.7977	38.4302		11.7976	38.5495		4.79856	39.3577		12.7982	30.5092		5.79954	35.2033		13.798	29.686		6.79876	36.3426		14.7984	38.3944		7.79747	41.7227		15.7989	33.1962
0.800309	82.3181		8.79941	63.8635		1.79963	41.0904		9.79922	33.7837		2.79889	46.0172		10.7991	34.1237		3.79951	40.7594		11.799	36.0115		4.7996	47.1088		12.7994	29.1075		5.80059	27.5477		13.7997	32.1286		6.80049	29.3878		14.8001	37.8815		7.7992	38.129		15.7998	38.9193
0.801212	89.419		8.80058	64.4062		1.8013	50.7949		9.80047	34.8186		2.79994	47.3831		10.8006	35.2033		3.80076	42.2058		11.8008	28.3291		4.80127	48.1585		12.8012	36.3664		5.80218	31.046		13.8013	32.2061		6.80202	34.0253		14.8017	43.3153		7.80073	34.6158		15.8014	42.17
0.802392	96.4692		8.80156	62.4707		1.80289	41.335		9.80137	40.8787		2.80098	36.4947		10.8024	35.2839		3.80159	45.3731		11.8022	38.0992		4.803	44.9734		12.8027	35.6716		5.80392	36.3038		13.8022	37.2253		6.80292	43.6731		14.8027	40.8966		7.8017	39.7335		15.803	31.5947
0.804198	90.7282		8.80309	73.6634		1.80394	40.8697		9.80276	39.4382		2.80258	37.9709		10.8036	32.3821		3.80284	49.7034		11.803	42.2744		4.80411	51.5733		12.8037	35.2719		5.80503	39.9154		13.8034	38.1678		6.80417	38.4063		14.8038	39.8259		7.80281	44.2278		15.8041	31.5619
0.805726	89.249		8.80489	68.498		1.80498	40.9234		9.80456	34.3027		2.80431	42.2178		10.8045	32.7131		3.80458	45.5371		11.8044	37.4848		4.80509	43.5717		12.8048	27.8549		5.806	38.5644		13.8052	33.4915		6.80598	34.3265		14.8056	39.304		7.80455	36.8078		15.8051	41.836
0.806559	90.2689		8.80607	68.6531		1.80664	36.4112		9.80595	38.7225		2.80542	44.7587		10.806	32.2121		3.8059	30.6493		11.8062	31.7677		4.80668	46.1425		12.8065	30.8134		5.8076	38.8448		13.8068	32.063		6.80744	34.7977		14.8071	37.9769		7.80622	32.4685		15.8066	47.4577
0.807601	87.3015		8.80684	64.8297		1.80831	42.7844		9.80685	48.4896		2.80639	37.965		10.8078	32.5938		3.80687	29.5846		11.8075	23.8467		4.80842	46.7449		12.8081	45.3403		5.80941	42.6621		13.8077	30.6553		6.80827	27.5626		14.808	43.8133		7.80719	31.4516		15.8084	36.1666
0.809268	95.4313		8.80822	62.083		1.80942	41.9822		9.80817	42.8619		2.80792	36.9331		10.809	34.2937		3.80812	40.7505		11.8083	33.5869		4.80946	52.465		12.8091	39.9422		5.81045	40.3717		13.8086	32.4805		6.80931	34.3564		14.8091	36.8377		7.8083	36.6677		15.8097	32.2389
0.810795	89.3176		8.80989	64.2899		1.81039	39.483		9.80998	40.4254		2.80966	39.2146		10.8099	36.3724		3.80979	50.774		11.8096	30.2795		4.81036	54.1292		12.8102	42.2685		5.81128	35.2988		13.8102	33.0799		6.81098	39.3339		14.8107	42.9872		7.81003	31.9168		15.8106	33.4289
0.811837	86.204		8.81121	67.2484		1.81199	51.3973		9.81137	37.5057		2.81084	41.3618		10.8114	26.3786		3.81138	36.0026		11.8112	36.0175		4.81182	51.0574		12.8119	37.3089		5.81267	32.3015		13.8118	35.4568		6.81257	40.1093		14.8122	42.8769		7.8117	36.1249		15.8119	34.592
0.812879	79.8755		8.81218	67.0516		1.81373	45.9636		9.8122	30.6285		2.81174	47.6844		10.8132	28.7615		3.81236	28.2933		11.8126	35.8296		4.81349	45.2567		12.8136	38.3437		5.81434	32.5878		13.8129	37.5236		6.81362	42.9276		14.8133	34.8932		7.8126	37.5295		15.8138	37.786
0.814476	77.4837		8.8135	64.4838		1.81477	37.1866		9.81338	36.8406		2.81327	41.5348		10.8144	33.9955		3.81347	31.6245		11.8136	31.3919		4.81467	39.8796		12.8145	34.2251		5.81566	26.7842		13.8139	36.6498		6.81466	39.6589		14.8144	39.1996		7.81351	31.6275		15.8152	41.839
0.816212	72.6076		8.81524	77.9788		1.8156	45.3045		9.81505	51.1826		2.81508	42.689		10.8153	39.0684		3.81513	35.8445		11.8149	31.374		4.81564	38.4571		12.8154	35.6596		5.81656	36.3426		13.8155	36.0772		6.81626	33.4885		14.8159	42.8112		7.8151	33.408		15.8161	36.9361
0.817323	74.1644		8.8167	68.8231		1.81706	36.8078		9.81644	40.3419		2.81626	42.516		10.8165	36.5484		3.8168	44.541		11.8165	34.7679		4.81703	38.7344		12.817	33.2648		5.81788	37.6697		13.8172	34.1744		6.81799	36.9748		14.8176	32.0779		7.8167	37.628		15.8174	31.2846
0.818295	79.2314		8.81767	64.5882		1.81873	41.9344		9.81748	37.1269		2.81702	50.3237		10.8182	32.8473		3.81791	43.1512		11.8181	40.2077		4.81884	42.847		12.8186	27.4523		5.81968	36.7482		13.8184	35.5851		6.81917	33.405		14.8189	34.7948		7.81788	38.6211		15.8192	33.4169
0.819823	74.2569		8.81885	62.5125		1.81991	38.2513		9.81866	38.97		2.81841	51.6866		10.8196	30.7984		3.81888	51.1498		11.8191	38.0276		4.82023	47.911		12.8197	34.413		5.82114	35.7402		13.8193	31.7617		6.82014	32.4566		14.8198	43.861		7.81885	40.7296		15.8206	34.5174
0.821629	86.8065		8.82059	61.4955		1.82088	42.1193		9.82033	36.5663		2.82008	44.7945		10.8206	30.193		3.82055	42.3311		11.8202	38.6479		4.82113	43.4316		12.8207	48.588		5.82211	32.7429		13.8208	39.0744		6.8216	38.4183		14.8212	47.7142		7.82038	37.6787		15.8214	36.4231
0.822809	88.5869		8.82218	61.6267		1.82227	43.7626		9.82192	37.1061		2.82139	47.3682		10.8218	31.6186		3.82222	42.5309		11.8219	41.0636		4.82238	50.4132		12.8222	39.8498		5.82329	38.3228		13.8226	41.8927		6.82334	34.6099		14.823	38.4093		7.82219	36.5245		15.8225	41.8987
0.823781	86.8601		8.82322	83.5796		1.82407	38.7493		9.82304	43.1751		2.82237	46.2469		10.8235	34.5323		3.82326	42.9842		11.8235	46.0471		4.82418	40.9592		12.8239	30.3272		5.82503	42.5905		13.8239	42.7486		6.82466	35.2272		14.8244	37.1359		7.82344	32.2926		15.8242	37.8636
0.82524	74.1674		8.82427	78.4172		1.82546	53.8279		9.82401	42.6651		2.82369	43.1989		10.8251	38.2364		3.82409	40.2733		11.8246	41.3559		4.82564	43.7507		12.8253	34.6904		5.82663	41.7376		13.8247	39.7663		6.82556	41.2783		14.8252	34.5204		7.82434	29.1283		15.8257	34.2222
0.827045	81.0625		8.826	62.1188		1.82644	47.4279		9.8256	36.1159		2.82542	47.7112		10.8261	46.6107		3.82562	35.1944		11.8256	34.9558		4.82654	47.6277		12.8262	25.5496		5.8276	41.4394		13.8261	29.7785		6.82702	41.5646		14.8266	42.4504		7.82573	36.7482		15.8267	35.2481
0.828226	77.7342		8.82767	63.5443		1.82762	39.981		9.82734	31.9556		2.82688	42.9454		10.8272	41.5646		3.82729	41.9583		11.8273	40.4164		4.82779	47.5352		12.8276	26.1251		5.82871	40.6401		13.828	26.6083		6.82882	30.6911		14.8285	45.7757		7.82753	36.1457		15.8278	35.6954
0.829059	81.5069		8.82857	64.9818		1.82942	44.881		9.82852	34.6158		2.82785	43.7477		10.8288	46.0202		3.82847	42.17		11.829	29.701		4.82967	42.847		12.8293	31.4307		5.83045	43.3391		13.8293	35.7103		6.83007	36.4619		14.8298	41.168		7.82892	34.9677		15.8295	32.6564
0.830378	76.8008		8.82947	61.1973		1.83095	47.747		9.82949	42.9126		2.82896	52.0117		10.8305	43.3898		3.82937	41.3797		11.83	28.4901		4.83113	51.8179		12.8307	32.567		5.83204	47.6426		13.8301	32.558		6.83084	39.8587		14.8305	51.2512		7.82983	39.137		15.8312	38.8
0.832115	74.2747		8.83107	73.4009		1.83185	49.7034		9.83109	35.4061		2.8307	63.1		10.8316	41.0696		3.83083	30.4107		11.8308	40.2166		4.83196	51.5912		12.8316	35.9072		5.83295	34.2132		13.8313	31.4844		6.83216	37.959		14.8318	39.2772		7.83115	41.1352		15.8323	42.1462
0.833434	72.9983		8.83274	79.5147		1.83303	43.4763		9.83283	33.2827		2.8323	51.2423		10.8326	37.9799		3.83256	34.9797		11.8324	40.7713		4.833	47.3861		12.8329	35.5493		5.83392	40.491		13.8331	37.0524		6.83382	36.8019		14.8335	46.9716		7.83302	39.0982		15.8332	36.6527
0.834337	74.7489		8.83385	74.9279		1.83484	46.7479		9.83394	39.0177		2.83334	46.8433		10.8342	35.5374		3.83395	47.4458		11.834	36.7005		4.83467	46.0441		12.8347	32.6326		5.83552	39.5337		13.8345	41.7823		6.83514	36.5633		14.8348	43.0618		7.83434	35.8863		15.8348	33.0471
0.835587	77.8655		8.83489	68.8976		1.83637	49.5573		9.83477	39.5158		2.83438	43.363		10.836	30.0857		3.83486	44.538		11.8351	36.4261		4.8362	47.246		12.8361	33.4855		5.83711	43.7477		13.8354	44.2159		6.83612	32.7548		14.8359	38.1379		7.83517	38.9611		15.8366	32.4059
0.837323	82.2853		8.83635	72.7508		1.8372	47.58		9.83623	40.4343		2.83612	48.1466		10.837	35.4807		3.83617	45.9636		11.8362	43.2258		4.83724	52.808		12.8369	37.2492		5.83822	37.2432		13.8366	39.1728		6.83737	40.6043		14.8371	36.274		7.83628	36.1756		15.8378	32.8473
0.83892	94.5396		8.83815	86.6067		1.83824	46.6346		9.8379	35.3435		2.83778	43.1512		10.8378	36.6945		3.83791	45.2627		11.8376	44.9287		4.83828	49.9151		12.8381	38.4332		5.8392	37.5325		13.8383	40.6789		6.8391	29.179		14.8387	37.8666		7.83795	28.3917		15.8387	41.7734
0.839892	83.9583		8.83941	79.634		1.83991	47.911		9.83915	35.9817		2.83876	47.5054		10.8393	33.3543		3.83937	33.2231		11.8394	41.6988		4.83988	40.321		12.8398	37.9799		5.84072	41.0248		13.8399	44.0489		6.8407	33.9836		14.8403	43.8163		7.83941	37.5355		15.8403	41.6183
0.841003	83.7048		8.84038	76.9797		1.84144	49.8108		9.84012	41.1322		2.83966	50.0971		10.841	39.9512		3.84034	43.0498		11.8407	44.5768		4.84161	37.3983		12.8412	35.9787		5.84253	38.4362		13.8409	44.377		6.84167	43.0677		14.8414	48.7252		7.84045	50.0792		15.8421	44.5589
0.84267	82.6461		8.8417	76.592		1.84248	51.6151		9.84144	47.8931		2.84119	48.1764		10.8422	40.7773		3.84159	50.273		11.8417	50.5862		4.84279	47.58		12.8423	42.4086		5.84378	44.1861		13.842	41.1769		6.84278	43.6493		14.8424	48.5433		7.84163	48.2003		15.8432	47.0223
0.844337	86.0847		8.8435	69.5388		1.84352	50.3177		9.84317	51.8775		2.84285	59.3601		10.8431	36.3008		3.8434	47.8663		11.843	43.3361		4.8437	53.8578		12.8434	41.2425		5.84468	48.1943		13.8436	45.7458		6.84452	52.0326		14.8441	49.9599		7.8433	46.7449		15.8439	44.5261
0.845379	91.2949		8.84489	76.3564		1.84512	51.2095		9.84463	47.5531		2.84396	53.9651		10.8445	38.4123		3.84486	54.2455		11.8447	42.6979		4.84516	56.0885		12.8451	42.5786		5.84607	48.1854		13.8453	42.3132		6.84619	54.4304		14.8458	43.691		7.84497	46.9835		15.8453	47.3712
0.84642	91.3784		8.84579	80.6778		1.84685	58.3253		9.8456	47.0879		2.84501	49.8197		10.8463	44.9734		3.84569	51.8835		11.8462	38.2751		4.84696	60.5083		12.8467	46.8881		5.84795	53.7743		13.8464	47.0461		6.84723	47.3265		14.8469	55.8052		7.84601	48.928		15.8471	43.4524
0.848156	92.5564		8.84711	84.4892		1.84803	55.17		9.84679	45.6862		2.84646	59.0202		10.8477	52.6648		3.8468	56.6552		11.8472	59.0023		4.84828	70.347		12.8478	54.7256		5.84927	51.4868		13.8475	53.813		6.84827	51.3526		14.8479	60.6545		7.84705	46.6167		15.8483	45.725
0.849823	98.2138		8.84899	80.803		1.849	70.7407		9.84852	47.5382		2.8482	56.9773		10.8487	61.5879		3.84847	57.3202		11.8483	51.281		4.84918	74.737		12.8488	55.9663		5.8501	59.7419		13.849	52.0326		6.84994	55.7635		14.8495	60.4278		7.84858	53.5536		15.8492	54.7733
0.850726	97.6412		8.85038	74.734		1.85046	67.308		9.85012	58.212		2.84952	53.8041		10.8499	60.1713		3.84999	68.0834		11.8501	44.4008		4.85064	68.7634		12.8503	56.1392		5.85149	64.2243		13.8508	55.3728		6.8516	55.3161		14.8512	61.2032		7.85031	54.329		15.8505	58.2537
0.851628	90.4896		8.85121	92.3953		1.85227	59.0888		9.85109	56.4285		2.85042	69.8788		10.8517	58.039		3.85104	58.3402		11.8516	53.3001		4.85245	72.9744		12.8521	55.0298		5.85336	62.7481		13.8518	53.0734		6.85257	64.6269		14.8523	73.4725		7.85149	47.7291		15.8523	52.0684
0.853156	88.4169		8.85232	90.7431		1.85352	67.7196		9.8522	52.2712		2.85181	63.1805		10.8532	64.946		3.85208	58.3998		11.8524	61.5402		4.8537	82.4523		12.8532	73.9139		5.85468	51.3705		13.8527	54.7584		6.85348	77.7253		14.8531	64.1587		7.85247	67.3558		15.8538	66.13
0.854823	92.8576		8.85406	89.7977		1.85442	74.3404		9.85394	57.8779		2.85362	63.9768		10.8541	66.7354		3.85367	74.0362		11.8535	59.384		4.85446	76.3713		12.8542	61.1645		5.85545	63.8128		13.8542	68.7932		6.855	76.756		14.8546	70.0846		7.85406	75.405		15.8548	66.6996
0.855934	104.456		8.85552	87.2389		1.85588	77.7163		9.85554	72.9208		2.85501	68.6203		10.8553	74.0511		3.85541	79.9561		11.8552	63.103		4.85578	78.2472		12.8557	64.7492		5.8567	81.2355		13.8559	74.5432		6.85667	75.912		14.8563	77.7492		7.8558	78.1219		15.8559	68.1461
0.856976	116.695		8.85656	101.787		1.85769	85.7179		9.85644	80.9999		2.85591	68.7843		10.8571	75.9508		3.85652	83.5915		11.8567	67.4065		4.85752	80.7762		12.8576	75.3812		5.85836	82.506		13.857	81.7276		6.85785	95.3329		14.8575	86.1504		7.85684	80.8418		15.8577	74.1077
0.858434	120.274		8.85767	106.645		1.85894	78.5544		9.85741	76.8067		2.85723	72.9595		10.8586	73.6127		3.85749	89.8484		11.8577	78.1458		4.85884	84.6204		12.8587	87.4387		5.85975	87.9159		13.858	85.6225		6.85876	88.6138		14.8585	98.1423		7.85767	72.9536		15.8593	80.6629
0.86017	125.52		8.85927	107.068		1.8597	91.945		9.85908	83.341		2.85903	84.4445		10.8594	77.1288		3.85902	97.7576		11.8588	90.9191		4.85981	99.7348		12.8595	88.6108		5.86079	86.6424		13.8594	84.3938		6.86021	90.8058		14.8598	110.346		7.85913	78.5126		15.8603	94.808
0.86149	128.634		8.861	122.281		1.86095	107.17		9.8606	90.5135		2.86042	92.0613		10.8605	85.0171		3.86076	110.671		11.8604	98.0379		4.86099	121.622		12.8609	92.8009		5.86191	119.394		13.8611	90.934		6.86202	109.398		14.8617	118.485		7.8608	88.6167		15.8614	100.197
0.862392	136.954		8.86211	128.052		1.86269	111.366		9.86172	94.7156		2.86126	102.13		10.8622	95.6819		3.86201	104.232		11.8621	101.951		4.86273	115.839		12.8626	97.1342		5.86364	113.626		13.8625	103.683		6.86334	116.478		14.863	105.252		7.86212	104.471		15.8631	109.329
0.863712	148.028		8.86308	128.314		1.86407	113.424		9.86276	115.109		2.86237	104.208		10.8637	111.109		3.86291	106.37		11.8633	96.7465		4.86432	113.704		12.8639	111.276		5.86524	111.339		13.8635	102.842		6.86424	119.815		14.8639	99.2308		7.86309	112.344		15.8648	114.861
0.865517	148.475		8.86461	118.16		1.86505	126.668		9.86428	122.499		2.8641	124.754		10.8647	124.375		3.86444	102.174		11.8642	106.362		4.86529	126.743		12.8648	115.932		5.86628	124.273		13.8647	110.167		6.86556	124.932		14.8651	109.97		7.86441	123.945		15.8657	126.233
0.866976	164.013		8.86635	145.859		1.86623	145.612		9.86602	129.099		2.86556	132.525		10.8658	129.212		3.86624	120.373		11.8657	116.385		4.86641	138.669		12.8662	127.673		5.86732	135.678		13.8665	129.015		6.86737	138.86		14.867	126.036		7.86615	129.6		15.8666	139.319
0.867879	179.682		8.86753	156.587		1.86796	139.337		9.8672	139.743		2.8666	139.528		10.8674	148.138		3.86742	147.398		11.8675	127.453		4.86807	157.601		12.8679	127.029		5.86899	163.169		13.868	143.151		6.86882	156.837		14.8685	154.27		7.86767	137.434		15.8682	139.561
0.869198	200.323		8.8685	164.967		1.86949	156.101		9.86817	146.533		2.86771	135.657		10.8691	158.078		3.86819	164.896		11.8687	140.017		4.86974	178.328		12.8694	145.46		5.87066	175.214		13.8689	154.44		6.86973	188.554		14.8694	178.17		7.86858	150.291		15.8698	147.518
0.871004	205.885		8.87003	180.082		1.87053	192.777		9.86963	144.488		2.86931	153.056		10.8703	162.006		3.86958	177.863		11.8697	138.848		4.87078	209.768		12.8703	153.187		5.87177	195.488		13.8701	150.014		6.87098	179.67		14.8706	150.727		7.86976	162.751		15.8709	187.445
0.872462	224.635		8.87183	207.054		1.87164	201.829		9.87137	168.54		2.87098	174.174		10.8713	182.253		3.87124	191.898		11.8712	164.746		4.87182	212.595		12.8715	177.732		5.87281	191.185		13.8719	170.303		6.87285	201.614		14.8724	169.796		7.87149	170.082		15.8719	205.98
0.873226	262.373		8.87295	220.021		1.87331	204.113		9.87269	205.744		2.87209	195.274		10.8727	188		3.87256	204.883		11.873	173.696		4.87356	225.153		12.8732	205.789		5.87441	218.598		13.8734	201.322		6.87431	240.077		14.8739	212.24		7.87309	203.624		15.8734	203.898
0.874337	286.562		8.87378	223.704		1.87498	237.637		9.87366	221.154		2.87313	211.67		10.8745	213.331		3.87354	218.264		11.8742	204.045		4.87523	243.542		12.8748	215.181		5.87614	267.365		13.8743	227.402		6.87507	273.709		14.8748	257.637		7.87406	233.018		15.8752	212.944
0.876004	291.79		8.87517	260.252		1.87602	260.488		9.87505	222.302		2.87466	244.425		10.8758	260.885		3.87479	246.784		11.8749	229.415		4.8762	300.385		12.8757	236.907		5.87718	321.679		13.8753	248.016		6.87619	280.505		14.8758	263.112		7.87524	244.774		15.8765	260.598
0.877531	339.597		8.87684	269.912		1.87706	291.194		9.87685	242.528		2.87639	271.224		10.8767	288.352		3.87652	270.392		11.8762	228.413		4.8771	336.925		12.8769	256.098		5.87809	333.215		13.877	263.211		6.87785	296.526		14.8774	276.196		7.87698	269.295		15.8773	304.54
0.878504	385.113		8.87815	302.199		1.87873	312.031		9.87817	277.929		2.87758	299.881		10.8781	294.922		3.87805	298.334		11.878	263.014		4.87863	348.094		12.8787	277.377		5.87954	358.902		13.8786	284.039		6.87938	356.987		14.879	324.578		7.87858	306.982		15.8787	328.205
0.879615	416.067		8.87913	339.156		1.88046	369.844		9.87894	317.206		2.87848	328.055		10.88	331.297		3.87902	352.448		11.8793	316.714		4.88023	419.416		12.8803	324.059		5.88114	395.199		13.8796	317.623		6.88042	408.513		14.8801	376.843		7.87948	369.745		15.8805	363.387
0.881281	432.741		8.88045	362.585		1.88137	423.725		9.88019	364.884		2.88001	354.932		10.8812	374.863		3.88013	392.298		11.8803	341.1		4.88141	465.869		12.8812	362.221		5.88239	458.341		13.8806	343.349		6.88146	430.543		14.8811	399.434		7.88045	377.765		15.8819	428.103
0.882948	486.59		8.88218	410.648		1.88227	440.459		9.88185	408.31		2.88181	434.978		10.882	411.739		3.88187	430.215		11.8815	351.13		4.88238	489.217		12.8821	407.621		5.88336	519.875		13.8822	404.758		6.88306	459.516		14.8827	436.215		7.88205	414.045		15.8828	478.749
0.884059	590.64		8.88364	519.834		1.8838	502.942		9.88331	462.955		2.88292	484.756		10.8833	496.757		3.88347	485.373		11.8833	418.966		4.88384	551.494		12.8837	452.275		5.88468	590.56		13.8839	481.061		6.8848	532.321		14.8844	498.078		7.88365	487.303		15.8841	490.046
0.885031	679.609		8.88461	550.984		1.88539	582.773		9.88428	537.725		2.88376	526.308		10.885	563.745		3.88451	560.96		11.8848	497.368		4.88557	630.031		12.8853	513.204		5.88649	651.903		13.8851	571.332		6.88598	630.767		14.8856	580.33		7.88476	553.254		15.886	550.79
0.886559	763.561		8.88579	595.823		1.88657	654.76		9.88547	577.422		2.88514	554.945		10.8863	644.125		3.88555	628.823		11.8858	542.282		4.88689	734.346		12.8864	598.791		5.88788	747.078		13.8861	597.628		6.88695	703.891		14.8865	657.384		7.8858	603.348		15.8873	630.001
0.888365	889.94		8.88753	637.838		1.88762	714.356		9.88713	613.321		2.88681	645.977		10.8873	674.759		3.88722	658.941		11.8869	604.925		4.88779	819.766		12.8874	673.107		5.88885	836.318		13.8875	634.453		6.88848	768.589		14.888	698.32		7.88733	676.614		15.8882	721.454
0.889545	975.768		8.88913	731.767		1.889	778.422		9.8888	703.688		2.88813	765.458		10.8885	755.792		3.88888	786.03		11.8886	669.349		4.88911	873.23		12.8889	719.357		5.8901	912.799		13.8893	728.447		6.89028	829.017		14.8898	804.004		7.88906	774.435		15.8893	777.787
0.890448	1068.59		8.8901	858.527		1.89074	902.752		9.88984	800.008		2.8891	840.192		10.8902	827.6		3.88985	922.951		11.8903	757.835		4.89092	973.594		12.8907	779.576		5.89184	1034.67		13.8906	819.975		6.89146	958.369		14.8911	959.64		7.89038	850.603		15.891	883.614
0.892045	1090.56		8.89121	920.169		1.89213	1024.14		9.89088	836.449		2.89042	883.498		10.8918	939.971		3.89083	958.96		11.8912	869.714		4.89238	1154.98		12.892	885.628		5.89336	1168.1		13.8915	916.489		6.89244	1050.44		14.892	995.857		7.89128	944.88		15.8925	1003.98
0.893781	1233.78		8.89295	1009.06		1.89303	1097.1		9.89248	955.79		2.89216	1009.75		10.8928	1055.79		3.89235	1030.54		11.8923	959.198		4.89328	1300.41		12.8929	959.41		5.89427	1313.27		13.8929	1049.26		6.89389	1170.88		14.8934	1068.01		7.89267	1036.76		15.8934	1098.92
0.894962	1443.16		8.89454	1120.13		1.89435	1131.29		9.89422	1082.34		2.89369	1137.84		10.8939	1132.26		3.89395	1150.71		11.894	1021.56		4.8946	1331.41		12.8943	1048.03		5.89552	1392.48		13.8948	1151.88		6.8957	1288.64		14.8953	1201.17		7.89448	1171.61		15.8946	1193.65
0.895795	1571.4		8.89545	1212.59		1.89609	1257.77		9.89533	1167.17		2.89459	1235.32		10.8956	1224.05		3.89513	1305.6		11.8957	1186.44		4.89641	1472.85		12.8961	1187.6		5.89732	1539.57		13.8961	1280.79		6.89688	1486.35		14.8965	1395.07		7.8958	1318.69		15.8963	1309.39
0.897115	1678.22		8.89642	1306.61		1.89755	1464.15		9.8963	1257.61		2.89577	1311.52		10.8972	1366.06		3.89611	1443.64		11.8967	1341.42		4.89779	1663.78		12.8974	1346.77		5.89885	1769.53		13.8968	1385.64		6.89764	1565.97		14.8973	1503.04		7.89663	1450.9		15.898	1445.13
0.898781	1789.67		8.89802	1358.36		1.89852	1643.39		9.8979	1370.3		2.89751	1452.67		10.8983	1551.28		3.89756	1517.27		11.8975	1394.9		4.8987	1841.99		12.8983	1436.02		5.89968	1960.44		13.8981	1478.59		6.89903	1653.68		14.8986	1596.05		7.89802	1543.44		15.899	1573.32
0.900101	1990.14		8.89961	1530.55		1.89977	1712.06		9.89963	1551.63		2.8991	1695.94		10.8993	1679.32		3.8993	1623.57		11.899	1501.61		4.89981	1929.44		12.8997	1554.66		5.90072	2044.28		13.8998	1577.21		6.9007	1823.98		14.9003	1702.61		7.8999	1679		15.9	1708.76
0.901073	2176.14		8.90072	1742.57		1.90157	1835.29		9.90067	1740.49		2.90008	1828.29		10.901	1809.49		3.90062	1934.05		11.9007	1612.25		4.90141	2026.85		12.9015	1714.16		5.90232	2182.85		13.9011	1734.72		6.90202	2003.2		14.9017	1908.23		7.90122	1909.71		15.9016	1841.41
0.902392	2345.91		8.9017	1874.76		1.90303	2070.61		9.90151	1857.97		2.90119	1904.12		10.9027	1960.34		3.90159	2053.6		11.9018	1809.34		4.90293	2271.19		12.9028	1923.31		5.90392	2427.64		13.9021	1866.66		6.90299	2133.81		14.9026	2065.48		7.90198	2017.77		15.9034	1981.23
0.904128	2463.45		8.90322	2009.24		1.90387	2223		9.90297	1964.12		2.90292	2045.5		10.9037	2137.07		3.90291	2110.54		11.9028	1959.9		4.90398	2546.15		12.9037	2083.27		5.90496	2648.61		13.9034	1949.28		6.90431	2284.94		14.9038	2161.7		7.90323	2098.89		15.9045	2163.86
0.905587	2667.47		8.90503	2152.33		1.90491	2313.24		9.9047	2095.6		2.90452	2235.17		10.9045	2296.36		3.90472	2327.63		11.9043	2033.03		4.90509	2644.29		12.9048	2140.92		5.906	2791.41		13.905	2124.27		6.90605	2417.45		14.9055	2317.87		7.9049	2196.37		15.9055	2299.4
0.906559	2884.97		8.90628	2359.2		1.90657	2512.12		9.90588	2216.1		2.90542	2425		10.906	2345.01		3.90611	2555.31		11.906	2138.46		4.90668	2737.85		12.9065	2277.41		5.90753	2879.54		13.9066	2311.35		6.90757	2649.88		14.9071	2507		7.90635	2370.58		15.9071	2385.63
0.90774	3028.87		8.90718	2514.42		1.9081	2746.87		9.90685	2401.11		2.90639	2576.22		10.9077	2507.56		3.90701	2707.04		11.9074	2353.27		4.90835	3044.86		12.908	2484.57		5.90927	3145.09		13.9076	2477.73		6.90855	2868.68		14.9081	2739.06		7.90733	2604.73		15.9088	2568.87
0.909476	3256.86		8.90857	2603.65		1.90914	2911.61		9.90824	2536.7		2.90799	2672.99		10.9089	2769.28		3.90833	2799.48		11.9083	2549.38		4.90946	3218.66		12.9089	2640.55		5.91045	3368.89		13.9087	2589.73		6.90966	2977.5		14.9092	2871.37		7.90851	2778.61		15.9099	2789.75
0.911073	3463.65		8.91038	2713.06		1.91019	3020.27		9.91005	2693.64		2.90959	2897.84		10.9099	2943.91		3.91013	2984.34		11.9096	2601.47		4.91043	3391.59		12.9101	2748.11		5.91142	3600.35		13.9104	2777.37		6.91139	3120.27		14.9109	2941.42		7.91017	2961.44		15.9107	2938.87
0.912045	3730.69		8.9117	2931.31		1.91178	3168.14		9.91144	2889.49		2.9107	3157.09		10.9113	3017.75		3.91152	3213.77		11.9114	2724.27		4.91196	3498.65		12.9118	2897.17		5.91288	3711.15		13.912	2989.41		6.91299	3349.03		14.9126	3184.95		7.91184	3153.93		15.9121	3003.76
0.913156	3953.54		8.9126	3137.87		1.91352	3370.5		9.91234	3097.93		2.91167	3271.41		10.9131	3245.8		3.91235	3376.84		11.9128	3031.16		4.91377	3751.63		12.9135	3134.7		5.91468	3888.5		13.9131	3184.85		6.91403	3658.56		14.9136	3472.94		7.91288	3314.31		15.9138	3133.23
0.914892	4040.23		8.91399	3281.88		1.9147	3643.99		9.91359	3168.94		2.9132	3398.67		10.9144	3461.3		3.91354	3531.59		11.9137	3276.56		4.91495	4045.54		12.9145	3352.11		5.916	4243.85		13.9141	3260.49		6.91507	3729.44		14.9146	3561.53		7.91385	3517.06		15.915	3377.19
0.91649	4268.49		8.91586	3405.2		1.9156	3744.44		9.91533	3300.54		2.91494	3565.08		10.9153	3553.64		3.91513	3726.75		11.915	3394.22		4.91592	4246.39		12.9155	3456.59		5.91691	4421.53		13.9158	3403.94		6.91681	3864.54		14.9162	3677.66		7.91552	3564.79		15.916	3601.93
0.917462	4505.42		8.91718	3634.42		1.91713	3925.58		9.91685	3598.96		2.91626	3855.37		10.9167	3638.51		3.91666	3987.6		11.9168	3514.07		4.91738	4389.41		12.9171	3562.68		5.91829	4467.32		13.9174	3572.1		6.91848	4193.23		14.918	3909.57		7.91726	3844.25		15.9173	3722.06
0.918365	4668.52		8.91802	3812.46		1.91894	4216.47		9.91776	3701.66		2.91716	4142.9		10.9184	3814.47		3.9177	4182.8		11.9183	3677.13		4.91918	4619.76		12.9188	3780.62		5.92017	4778.17		13.9184	3800.04		6.91938	4448.07		14.9189	4089.02		7.91837	4122.87		15.9191	3918.35
0.919892	4872.11		8.9192	3888.7		1.92012	4480.77		9.91901	3842.92		2.91855	4209.91		10.9199	4056.75		3.91881	4324.73		11.9191	3939.6		4.92036	4909.19		12.9199	3991.24		5.92142	5218.07		13.9193	3975.45		6.92035	4519.87		14.9198	4247.28		7.91934	4284.31		15.9205	4102.53
0.921559	5118.64		8.92093	4041.75		1.92102	4704.94		9.92081	4039.7		2.92028	4340.94		10.9208	4269.29		3.92041	4556.51		11.9201	4012.79		4.92113	4974.04		12.9209	4118.23		5.92218	5311.43		13.9209	4137.19		6.92188	4666.89		14.9214	4425.7		7.92094	4431.41		15.9215	4215.07
0.92267	5444.25		8.92239	4330.5		1.92255	4844.16		9.92234	4282.52		2.92167	4608.38		10.9221	4375.88		3.92208	4765.64		11.9219	4157.51		4.92252	5142.71		12.9225	4328.73		5.92343	5385.53		13.9225	4310.92		6.92348	4837.26		14.923	4598.09		7.92267	4648.26		15.9227	4452.26
0.923643	5547.04		8.92336	4520.54		1.92435	4995		9.92317	4355.74		2.92258	4808.17		10.9239	4660.99		3.92319	4953.6		11.9233	4330.67		4.92418	5421.43		12.9243	4560.26		5.92517	5566.86		13.9237	4530.4		6.92459	4992.17		14.9242	4838.25		7.92372	4873.19		15.9244	4484.05
0.92517	5757.12		8.92454	4644.1		1.92553	5225.5		9.92422	4480.34		2.92389	4974.08		10.9253	4917.82		3.92416	5162.65		11.9244	4541.59		4.9255	5595.66		12.9253	4762.01		5.92649	5867.57		13.9246	4703.1		6.92563	5143.62		14.9251	4983.63		7.92462	5038.28		15.926	4760.4
0.926976	6035.33		8.92621	4735.65		1.9263	5370.88		9.92588	4670.46		2.92577	5175.22		10.9262	5112.36		3.92569	5253.64		11.9255	4707.36		4.92648	5886.03		12.9261	4794.43		5.92746	6190.39		13.9261	4815.07		6.92709	5372.47		14.9266	5158.65		7.92608	5132.93		15.927	5008.12
0.928226	6379.39		8.92788	5038.15		1.92769	5459.03		9.92741	4929.73		2.92709	5461.85		10.9272	5174.87		3.92742	5622.95		11.9271	4867.52		4.92773	6145.16		12.9276	4962.73		5.92871	6399.87		13.9279	4999.01		6.92882	5672.01		14.9283	5377.91		7.92774	5352.91		15.9281	5118.41
0.929198	6539.96		8.92899	5366.36		1.92935	5655.92		9.92852	5117.25		2.92785	5699.32		10.9289	5408.06		3.92861	5938.7		11.9288	5136.48		4.92946	6267.13		12.9292	5272.85		5.93038	6566.45		13.9292	5262.67		6.93014	5957.46		14.9297	5573.26		7.92892	5637.44		15.9299	5304.49
0.930517	6662.02		8.92996	5414.88		1.93067	5937.53		9.92956	5314.02		2.92903	5747		10.9304	5635.75		3.92958	5941.38		11.9299	5333.83		4.93099	6454.77		12.9305	5456.05		5.93197	6814.87		13.9301	5506.72		6.93105	6029.73		14.9306	5829.3		7.9299	5807.57		15.9314	5579.61
0.932323	6901.01		8.93163	5442.03		1.93164	6132.62		9.93109	5422.06		2.93077	5927.4		10.9315	5748.54		3.9311	6134.43		11.9308	5480.12		4.93196	6864.12		12.9314	5605.12		5.93302	7081.7		13.9314	5609.78		6.93244	6198.93		14.9319	5874.69		7.93128	5985.31		15.9323	5774.63
0.933712	7184.15		8.93329	5736.6		1.93289	6381.04		9.93283	5726.1		2.93223	6242.85		10.9326	5919.99		3.93291	6414.1		11.9324	5555.55		4.93307	6972.68		12.9328	5793.73		5.93406	7338.84		13.9332	5768.52		6.93424	6544.96		14.9337	6061.53		7.93309	6180.48		15.9334	5878.24
0.934615	7429.95		8.9344	6086.28		1.93463	6547.01		9.93401	5905.78		2.93313	6436.53		10.9342	6140.49		3.93402	6762.67		11.9342	5750.83		4.93481	7120.97		12.9346	6006.98		5.93572	7460.82		13.9346	6138.2		6.93563	6816.72		14.9351	6424.54		7.93448	6381.1		15.935	5979.48
0.936004	7556.13		8.93538	6250.89		1.93616	6833.11		9.93491	6057.34		2.93431	6637.04		10.9358	6307.09		3.93485	7018.07		11.9353	6037.37		4.93641	7514.1		12.936	6310.12		5.93746	7752.2		13.9355	6362.16		6.93653	6984.33		14.936	6660.56		7.93538	6649.86		15.9366	6256.42
0.937809	7809.07		8.93704	6401.47		1.93713	7116.14		9.93644	6186.32		2.93598	6869.71		10.9369	6584.96		3.93624	7126.14		11.9363	6239.09		4.93745	7718.18		12.9369	6575.32		5.9385	8013.54		13.9368	6417.17		6.93785	7088.42		14.9373	6698.35		7.93663	6915.42		15.9376	6518.83
0.939129	8098.2		8.93878	6612.38		1.93831	7300.56		9.93824	6451.77		2.93764	7158.7		10.9379	6844.37		3.93791	7261.33		11.9378	6430.94		4.93849	7986.15		12.9381	6614.61		5.93948	8402.19		13.9386	6628.6		6.93973	7358.31		14.9391	7022.77		7.93844	7128.59		15.9387	6541.77
0.939962	8312.03		8.93982	6818.94		1.93998	7542.22		9.93949	6656.62		2.93869	7401.43		10.9394	6927.26		3.93916	7530.27		11.9397	6709.5		4.94016	8127.28		12.9399	6697.78		5.94121	8543.1		13.9401	6847.52		6.94112	7713.52		14.9405	7332.1		7.93997	7266.06		15.9402	6759.21
0.941142	8521.14		8.94065	7059.14		1.94164	7851.84		9.9404	6882.47		2.93966	7621.59		10.9413	7198.03		3.94013	7687.46		11.9408	6893.53		4.94189	8407.89		12.9414	7034.57		5.94295	8800.76		13.9409	7073.39		6.94188	7869.27		14.9414	7435.01		7.94087	7446.96		15.9419	7067.31
0.942809	8771.2		8.94211	7220.66		1.94269	8038.75		9.94185	6979.86		2.94126	7762.6		10.9424	7540.64		3.94145	7822.1		11.9416	7041.64		4.94286	8803.88		12.9423	7281.52		5.94392	9163.09		13.942	7338.83		6.94306	7921.79		14.9425	7548.73		7.94212	7670.86		15.9432	7323.25
0.944268	9057.64		8.94378	7484.9		1.94373	8234.78		9.94366	7179.83		2.94299	8046.9		10.9434	7679.96		3.94319	8219.25		11.943	7187.66		4.94377	8957.77		12.9435	7493.85		5.94475	9283.65		13.9437	7453.09		6.94473	8101.38		14.9442	7727.38		7.94385	7910.63		15.9441	7523.51
0.94524	9399.18		8.94503	7705.93		1.94539	8429.15		9.94491	7474.75		2.94417	8257.59		10.9449	7786.67		3.94465	8526.75		11.9447	7368.85		4.94529	9130.09		12.9453	7749.93		5.94628	9421.22		13.9452	7648.69		6.94612	8445.36		14.9458	8080.58		7.94538	8249.33		15.9455	7639.98
0.94642	9592.71		8.946	7741.88		1.94706	8723.57		9.94574	7676.63		2.94508	8457.56		10.9467	8049.38		3.94562	8836.11		11.946	7684.98		4.94696	9303.91		12.9469	7917.08		5.94788	9703.61		13.9462	7896.23		6.94716	8666.66		14.9467	8258.8		7.94622	8452.12		15.9473	7793.33
0.948087	9735.91		8.94732	7882.43		1.94803	8872.44		9.94706	7805.19		2.94667	8580.97		10.9479	8489.04		3.9468	8944.85		11.9469	7995.4		4.94807	9621.14		12.9478	8057.82		5.94906	10029.9		13.9473	8060.51		6.94834	8884.78		14.9478	8374.47		7.94726	8648.7		15.9487	8073.98
0.949684	10014.8		8.94913	8170.23		1.94894	9106.94		9.94873	8062.61		2.94848	8955.82		10.9487	8557.61		3.94854	9152.55		11.9483	8021.08		4.94904	9836.1		12.9487	8299.66		5.9501	10242.7		13.9489	8261.62		6.94994	8926.03		14.9494	8622.89		7.94892	8884.58		15.9495	8347.54
0.950795	10370.9		8.95052	8478.22		1.95046	9363.34		9.95012	8174.65		2.94952	9198.41		10.9501	8690.45		3.95013	9493.32		11.95	8249.81		4.95057	10009.8		12.9504	8515.46		5.95149	10453		13.9506	8533.8		6.9516	9336.83		14.9511	8875.57		7.95045	9047.64		15.9509	8537.1
0.951767	10692.6		8.95149	8714.11		1.95213	9578.19		9.95109	8433.78		2.95035	9419.48		10.9517	8949.19		3.95111	9732.85		11.9515	8526.08		4.95231	10352.7		12.9519	8664.51		5.95322	10859.8		13.9518	8851.88		6.95271	9699.07		14.9522	9055.16		7.95156	9225.33		15.9528	8715.24
0.953365	10853.1		8.95267	8838.58		1.95324	9849.45		9.95234	8582.33		2.95181	9498.62		10.9531	9207.26		3.95222	9927.13		11.9524	8871.49		4.95363	10672.8		12.953	8910.87		5.95461	11159.6		13.9527	9007.2		6.95376	9866.03		14.9532	9291.94		7.9526	9494.09		15.9541	8877.49
0.955101	11116.8		8.9544	8934.37		1.95421	10094.8		9.95401	8816.08		2.95348	9762.52		10.954	9341.48		3.95395	10038.9		11.9536	8932.58		4.95453	10859.6		12.9541	9066.59		5.95559	11526.5		13.9543	9080.63		6.95535	10115.2		14.9547	9479.2		7.95413	9633.67		15.9548	9121.26
0.956281	11445.8		8.95593	9221.59		1.95574	10082.6		9.9556	9112.75		2.95473	10043		10.9553	9421.29		3.95555	10309		11.9553	9143.98		4.95585	11111.1		12.9556	9279.2		5.95684	11677.6		13.9561	9364.91		6.95709	10459.3		14.9565	9737.96		7.95587	9937.44		15.9561	9412.99
0.957184	11588.7		8.9569	9545.39		1.95748	10483.8		9.95665	9385.53		2.9557	10228.9		10.957	9791.93		3.95652	10694.3		11.9569	9309.96		4.95766	11304.9		12.9573	9482.29		5.95864	11891.3		13.9572	9664.33		6.9582	10767.2		14.9577	10035.6		7.95712	10244.8		15.9578	9588.69
0.958781	11783.4		8.95809	9652.94		1.9588	10808		9.95769	9589.44		2.95702	10457.6		10.9585	9954.41		3.95742	10780		11.9579	9415.26		4.95904	11512.8		12.9586	9794.8		5.9601	12245.2		13.9581	9969.88		6.95917	10837.2		14.9586	10305.2		7.95802	10341.3		15.9592	9698.83
0.960587	12110.9		8.95989	9921.45		1.9597	11072.5		9.95942	9716.94		2.95883	10641.2		10.9595	10119.8		3.95902	10893.7		11.959	9617.44		4.95995	11788		12.9595	10025.6		5.961	12407.2		13.9596	9949.62		6.96077	10974.9		14.9601	10398.6		7.95948	10502.7		15.9602	9880
0.961698	12478.7		8.96142	10222.7		1.96102	11148.1		9.96109	9909.63		2.96028	10874.9		10.9607	10234.7		3.96062	11114.2		11.9608	9868.78		4.96127	11996		12.961	10094		5.96225	12491.3		13.9614	10173.3		6.9625	11226.4		14.9619	10520.8		7.96128	10778.2		15.9614	10108.7
0.962462	12663.3		8.96232	10384.6		1.96282	11363		9.96213	10020		2.96119	11155.8		10.9624	10492.5		3.96173	11201		11.9624	10068.1		4.96307	12264.1		12.9628	10326.6		5.96413	12802.1		13.9627	10383.6		6.96362	11575		14.9632	10801.8		7.9626	11066.1		15.963	10130.1
0.96392	12728.1		8.96329	10541.4		1.96421	11595		9.96317	10158.4		2.96237	11290.6		10.964	10716		3.96277	11467.1		11.9633	10322.1		4.96453	12608.8		12.964	10724.4		5.96559	13161.5		13.9634	10565.7		6.96445	11732.2		14.9639	10940.1		7.96351	11194.7		15.9646	10337.3
0.965656	12878.3		8.96496	10546.6		1.96519	11889.7		9.96484	10375.5		2.96417	11351.8		10.965	10849.5		3.96423	11896.8		11.9642	10418		4.96529	12752.3		12.965	10643.1		5.96635	13440.6		13.9648	10812.8		6.96584	11823.8		14.9653	11017.9		7.9649	11330.6		15.9657	10695.1
0.966906	13069.4		8.96649	10820.6		1.96644	12027.4		9.96658	10579.7		2.9657	11681.1		10.9661	11094.6		3.96604	12058.6		11.9658	10629.8		4.96648	12807.7		12.9664	10838.8		5.96746	13553.7		13.9665	10934.5		6.96751	11926.5		14.9669	11244.4		7.96677	11440		15.9667	10818.6
0.967879	13501.7		8.9676	10962.7		1.96831	12065.8		9.96755	10916.1		2.96667	11959.6		10.9678	11204.3		3.96729	12292.1		11.9674	10859		4.96814	13033.7		12.9682	11082.4		5.96913	13664.1		13.9678	11091.1		6.96882	12146		14.9683	11473.4		7.96802	11779.7		15.9684	10960.5
0.969198	13563.8		8.96864	11062.1		1.9697	12228.9		9.96845	11052.7		2.96785	12135.2		10.9694	11360		3.96826	12506.9		11.9685	10983.6		4.9696	13258.9		12.9694	11360.6		5.97066	13988		13.9688	11257.4		6.96973	12344.1		14.9692	11597.4		7.96879	11996.1		15.97	11198.6
0.970934	13712.6		8.97024	11293.6		1.97046	12475.5		9.96998	10881.6		2.96959	12267.9		10.9704	11607.3		3.96958	12517.4		11.9695	11108.8		4.97064	13394.9		12.9703	11441.5		5.9717	14022.8		13.97	11320.8		6.97105	12461.5		14.9705	11793.2		7.9701	12062.7		15.9712	11450
0.972392	13785.3		8.97197	11534.5		1.97164	12658		9.97158	11212.8		2.97119	12485.7		10.9713	11680.6		3.97138	12595.8		11.971	11209.9		4.97175	13645.3		12.9715	11416.9		5.97274	14183.9		13.9718	11589.6		6.97285	12652.8		14.9723	11869.5		7.97177	12234.7		15.9722	11425
0.973295	13939.7		8.97316	11665.1		1.97331	12803.2		9.97276	11537.4		2.97202	12727.6		10.9728	11714.3		3.9727	12772.3		11.9728	11328.4		4.97335	13772.4		12.9732	11692.6		5.97434	14367.8		13.9733	11764.3		6.97431	12757		14.9737	12179.7		7.97309	12584.9		15.9738	11636.2
0.974545	14249.4		8.97413	11666		1.97477	13031.4		9.9738	11626.2		2.97299	12813		10.9745	12011.1		3.9736	13033		11.974	11648.5		4.97502	13984.1		12.9746	11872.7		5.97607	14563.8		13.9743	11853		6.97528	12903.6		14.9747	12512.6		7.97406	12652.2		15.9755	11823.5
0.976281	14320.4		8.97559	11798.2		1.97581	13163.3		9.97526	11618.2		2.97466	12969.6		10.9756	12232.7		3.97499	13097		11.975	11852.2		4.97613	14152.5		12.9755	12100.4		5.97718	14821.7		13.9754	11935.7		6.97639	13031.5		14.9758	12506.8		7.97531	12651.9		15.9766	11949.9
0.977879	14437		8.97732	11906.5		1.97692	13285.3		9.97699	11833.2		2.97619	13045.6		10.9766	12202.9		3.97687	13434.7		11.9764	11803.9		4.97717	14232.8		12.9767	12001.1		5.97816	14977.4		13.9771	12034.4		6.9782	13168.7		14.9776	12520.5		7.97705	12807.7		15.9775	11925.4
0.978851	14693.2		8.97864	12181.9		1.97859	13397.5		9.97831	11947.6		2.9773	13264.7		10.9781	12459.8		3.97819	13576.4		11.9782	11801.9		4.9787	14450.1		12.9785	12101.1		5.97968	14980		13.9787	12206.8		6.9798	13383		14.9792	12631.3		7.97865	13078.4		15.9789	12124.2
0.979962	14754.1		8.97954	12367.9		1.98026	13570.3		9.97922	12014.2		2.97827	13296.6		10.9799	12521		3.97902	13607.1		11.9795	12019.4		4.98043	14411.3		12.9801	12240.3		5.98149	15041.5		13.9797	12360		6.98077	13353.4		14.9802	12747.2		7.97962	13272.9		15.9806	12245.2
0.981698	14865.1		8.981	12348		1.98137	13724.4		9.98054	12198.9		2.9798	13247.9		10.9812	12594		3.9802	13662.7		11.9804	12133.6		4.98161	14445.5		12.9811	12350.1		5.98274	15163		13.9808	12476.1		6.98188	13446.6		14.9812	12780.4		7.98073	13273.3		15.9818	12284.3
0.983295	14987.3		8.98281	12230.8		1.98234	13703.6		9.98234	12247.9		2.9816	13550.1		10.9821	12567.3		3.98187	13918.2		11.9818	12330.1		4.98252	14546.8		12.9821	12447.4		5.98364	15264.8		13.9825	12492.3		6.98362	13503.4		14.983	12809.6		7.9824	13289		15.9828	12387.6
0.984198	15157.2		8.98413	12388.1		1.98387	13803.1		9.9838	12344.9		2.98285	13697.3		10.9835	12755.4		3.98326	13927		11.9836	12283.8		4.98411	14699.5		12.9838	12476.9		5.9851	15179.8		13.9842	12547.2		6.98521	13730.6		14.9846	13060.5		7.98406	13514.1		15.9841	12394.1
0.98517	15143.4		8.98489	12526.8		1.9856	13968.1		9.9847	12523.5		2.98376	13644.6		10.9853	12764.1		3.9843	14127.9		11.985	12388		4.98585	14872.4		12.9855	12680.8		5.98691	15349.5		13.9851	12760.7		6.98612	13877.9		14.9856	13054.1		7.98517	13518.7		15.9859	12466
0.986768	15270.4		8.98614	12527.7		1.98678	14010.7		9.98595	12452.3		2.98521	13731.4		10.9867	12739.8		3.98548	14292.7		11.9858	12596.1		4.98696	15008		12.9866	12750.6		5.98816	15607.3		13.986	12845.7		6.98709	14004.6		14.9865	13197.1		7.98615	13523.1		15.9873	12711.9
0.988365	15422.2		8.98788	12686.7		1.98776	14120.1		9.98776	12460.5		2.98695	13810.9		10.9876	12923.3		3.98715	14272.3		11.9869	12643.1		4.98779	14907.9		12.9876	12796.6		5.98892	15651.2		13.9876	12856.2		6.98869	13896.3		14.988	13327.4		7.98781	13636.8		15.9882	12716.4
0.989476	15459		8.98927	12717.3		1.98935	14203.8		9.98922	12565.9		2.98827	13858.8		10.9889	13032.3		3.98881	14323.2		11.9887	12607		4.98925	15041.7		12.9892	12907.7		5.99024	15482		13.9892	12920.9		6.99028	13940.1		14.9897	13220.4		7.98955	13743.7		15.9895	12712.6
0.990517	15493.1		8.99024	12750		1.99109	14196.3		9.99005	12601.3		2.98917	13975		10.9907	13121.8		3.98986	14299.5		11.9901	12751.5		4.99092	15294.9		12.9909	12966.8		5.99191	15607.2		13.9904	13017.6		6.99139	14080.2		14.9908	13259.7		7.99052	13906.8		15.9912	12689
0.992045	15384.2		8.99149	12842.2		1.99227	14110.4		9.99116	12731.1		2.99063	14090		10.9921	13169.5		3.9909	14442.8		11.9911	12781.9		4.99217	15352.4		12.9919	13136.4		5.99323	15822.1		13.9913	13003.4		6.99237	14082		14.9918	13419.8		7.99142	13924.5		15.9928	12768.7
0.993781	15553.9		8.99316	12728.7		1.9931	14024.9		9.99283	12803.4		2.99244	14107.1		10.9929	13204		3.99242	14444.4		11.9922	12773.5		4.99314	15340.9		12.9928	12964.6		5.9942	15831.1		13.9928	13073.2		6.99389	14076.5		14.9933	13468.4		7.99295	13993.1		15.9937	12829.1
0.994962	15614.8		8.99475	12864		1.99442	14188.6		9.99435	12895.9		2.99369	14273.5		10.994	13286.6		3.99416	14431.4		11.9939	12732.9		4.99446	15280.7		12.9943	12976.6		5.99545	15697.5		13.9946	13060.6		6.9957	14181		14.9951	13422.5		7.99462	13884.3		15.9949	12946.9
0.995865	15632.6		8.99579	12908.9		1.99609	14436		9.9954	12842.5		2.99452	14268.3		10.9957	13313.9		3.99534	14489.6		11.9956	12772.8		4.9962	15271.7		12.996	12990.5		5.99718	16100.9		13.9959	13021.9		6.99695	14041.4		14.9964	13487		7.9958	14011.1		15.9967	12991.9
0.997323	15643		8.99683	12885.9		1.99741	14416.9		9.99651	12728.4		2.99577	14169.8		10.9972	13304.5		3.99624	14504.4		11.9966	12795.1		4.99766	15247.7		12.9971	12937.9		5.99871	16031.3		13.9968	13051.4		6.99785	14107		14.9973	13586.9		7.9967	14014.9		15.9982	12886
0.999129	15676.9		8.9985	13010.9		1.99838	14411.3		9.9981	12766		2.99744	14271.9		10.9982	13237.6		3.99784	14490.7		11.9976	12815.6		4.99863	15403.8		12.9981	12993.7		5.99968	15844.3		13.9981	13039		6.99924	14125.1		14.9987	13500.8		7.99816	13994.8		15.9991	12951
1.00045	15575.5		9.00017	13003.7		1.9997	14403.1		9.99977	12914.3		2.99889	14365.5		10.9993	13304.2		3.99965	14471.2		11.9992	12926.5		4.99981	15374.4		12.9995	13015.2		6.00079	15877		14	13063.6		7.00105	14232.7		15.0005	13536.1		7.99997	13971.3		16.0001	12868.1
1.00135	15652.1		9.00128	12917.3		2.00144	14331.9		10.0009	12877.2		2.99987	14232.4		11.001	13308.4		4.00069	14438.7		12.0009	12941.6		5.00154	15197.7		13.0012	13188.5		6.00253	15994.2		14.0013	13044.8		7.00237	14329.8		15.0019	13485.8		8.00135	13822.9		16.0018	12816.9
1.00274	15675.8		9.00232	12856.1		2.00289	14492.4		10.0019	12784.9		3.00098	14302		11.0026	13173.6		4.00152	14476.2		12.0021	12792.1		5.00314	15137.1		13.0026	13100.2		6.0042	16080.5		14.0022	13027.9		7.00327	14212.1		15.0027	13455.3		8.00226	13939.6		16.0033	12926.5
1.00461	15679.2		9.00392	12953.2		2.00387	14546.2		10.0034	12735.7		3.00264	14333.3		11.0038	13243.1		4.00298	14511.3		12.0031	12981.3		5.00411	15147.4		13.0036	12988.8		6.00524	15875.6		14.0036	13147.2		7.00466	14179.6		15.004	13493		8.00351	13995.8		16.0043	12889.7
1.00593	15666.1		9.00559	12797.3		2.00505	14430.1		10.0051	12940.5		3.00431	14183.3		11.0047	13245.9		4.00465	14713.2		12.0047	12900.8		5.00523	15329.6		13.0048	13078.4		6.00628	15812.8		14.0054	13081.4		7.00653	14238.3		15.0058	13536.1		8.00531	13820.1		16.0054	12821.6
1.0067	15730.3		9.00663	12792.6		2.00678	14404.5		10.0064	12885.1		3.00535	14116.9		11.0063	13171.7		4.0059	14637.7		12.0064	12804.1		5.00696	15317		13.0066	13206.3		6.00795	15846.9		14.0068	12990.4		7.00785	14088.6		15.0073	13397		8.00677	13829.5		16.007	12788
1.00795	15622.4		9.00753	12855.8		2.00838	14337		10.0073	12807.2		3.00639	14184.9		11.0081	13087		4.00687	14595.7		12.0075	12739.2		5.00856	15239		13.0081	12972.2		6.00961	15812.6		14.0076	13015.6		7.00862	14078.3		15.0081	13292.5		8.00767	13872.1		16.0087	12698.2
1.00961	15437.6		9.00899	12771.1		2.00935	14242.4		10.0088	12718.9		3.00806	14212.5		11.0092	13219		4.00819	14510.6		12.0083	12823.6		5.00946	14971		13.009	12894.9		6.01059	15681.6		14.0087	12914.3		7.0098	13898.6		15.0092	13247		8.00892	13676.2		16.0099	12605
1.01107	15412.5		9.01065	12651.7		2.01046	14132.4		10.0106	12619.6		3.00973	14112.5		11.0101	13204.5		4.00999	14424.6		12.0097	12930.4		5.0105	14966.7		13.0103	12871.7		6.01156	15741.5		14.0104	12964.3		7.01153	13975.4		15.0109	13257		8.01073	13624.4		16.0108	12622.3
1.01205	15410.7		9.01184	12711.3		2.0122	14112.5		10.0118	12521.1		3.01084	14032.3		11.0117	13040.2		4.01138	14362.7		12.0115	12693.1		5.01203	14945.3		13.0121	12745		6.01309	15795		14.0119	12913.2		7.01292	13862.5		15.0123	13247.6		8.01219	13533.3		16.0123	12694.2
1.01323	15296.6		9.01281	12740.5		2.01387	14104.8		10.0125	12624.6		3.01181	13918.7		11.0135	12913.3		4.01236	14444.3		12.0127	12694		5.01363	15011.9		13.0135	12850.3		6.01468	15689.3		14.0129	12876.9		7.01389	13640.4		15.0134	13061.4		8.01302	13469.7		16.0141	12617.3
1.01489	15348.4		9.01427	12708		2.0147	13982		10.0139	12533.7		3.01341	14036.6		11.0147	12862		4.01354	14347.1		12.0137	12516.7		5.01474	14841.4		13.0144	12651.7		6.01579	15286.2		14.014	12868.4		7.01507	13825		15.0145	12997.9		8.01413	13503.6		16.0154	12522.8
1.01649	15084.2		9.016	12655.9		2.01567	13937.5		10.0156	12400.5		3.01514	13902.7		11.0155	12817.9		4.01527	14305.2		12.015	12522.6		5.01571	14906.1		13.0155	12463.6		6.01684	15296.1		14.0156	12803.6		7.01674	13790		15.0162	13177.2		8.0158	13606		16.0163	12511.7
1.01753	15088.8		9.01739	12418.4		2.01727	13778.9		10.0169	12424.9		3.01619	13703		11.0169	12881.6		4.01687	14191		12.0167	12540.2		5.01724	14817.5		13.0171	12378.3		6.01829	15261.6		14.0173	12620.5		7.01841	13557.2		15.0178	13078.9		8.01733	13497		16.0177	12421.4
1.01864	15006.9		9.01836	12227.7		2.01887	13690.8		10.0179	12362.8		3.01702	13600.7		11.0186	12665.8		4.01784	13939.6		12.0182	12317.7		5.01904	14660.4		13.0186	12440.1		6.02003	15003.1		14.0184	12607.9		7.01945	13359.2		15.0189	12831.1		8.01837	13434.9		16.0196	12115.6
1.02024	14842.9		9.01961	12129.4		2.01998	13639.8		10.0191	12303.6		3.01848	13685.5		11.0199	12490		4.01902	13916.5		12.0192	12246.1		5.02029	14470.4		13.0196	12367.7		6.02135	14901.6		14.0195	12431.1		7.02042	13322.8		15.0199	12729.1		8.01941	13102.6		16.0208	11989
1.02191	14688.7		9.02135	12222.6		2.02095	13521.1		10.021	12166.1		3.02014	13588.9		11.0208	12399.3		4.02076	13842.6		12.0203	12183.9		5.0212	14335.6		13.0207	12274.4		6.02225	14875.5		14.021	12475.8		7.02209	13167.4		15.0214	12800.8		8.02108	12965.2		16.0216	11937
1.02302	14413.6		9.02288	12117.4		2.02248	13413.4		10.0225	11981.3		3.02139	13577.3		11.0222	12354.8		4.02229	13663.4		12.022	12038.7		5.02259	14208		13.0223	12164		6.02357	14810.6		14.0227	12264.2		7.02382	12977.9		15.0232	12560.4		8.02274	12918.7		16.0229	12070.2
1.02399	14376.6		9.02378	11823.9		2.02421	13309.6		10.0235	11796.6		3.02237	13338		11.0239	12245		4.02319	13523.8		12.0236	11750.8		5.02439	14151.9		13.024	12078.2		6.02538	14576.3		14.0239	12277.1		7.02494	12819.7		15.0244	12443.8		8.02392	12833.7		16.0246	11829
1.02566	14347.1		9.02503	11835		2.02546	13038.1		10.0246	11829.5		3.02376	13236.7		11.0253	12041.2		4.02416	13551		12.0246	11717		5.02571	14068.1		13.0252	11868.7		6.02684	14366.3		14.0248	12091		7.02591	12786.4		15.0253	12235.6		8.0249	12743.8		16.0259	11584.8
1.02739	14068.9		9.02684	11730.1		2.02644	13073.9		10.0263	11753.4		3.02549	13008.1		11.0263	11877.5		4.02576	13367.8		12.0258	11724.6		5.02661	13885.5		13.0262	11773.2		6.02774	14130.5		14.0263	12028.4		7.02751	12639.2		15.0269	12201.8		8.02642	12500.6		16.0268	11603
1.02843	13844.3		9.02829	11511		2.02776	12942.8		10.0279	11562.8		3.02688	12891.7		11.0275	11682.3		4.02735	12922.8		12.0275	11560.7		5.02793	13665.5		13.0276	11567.4		6.02899	14153.7		14.0281	11796.3		7.02931	12329.7		15.0286	11988		8.02823	12377		16.0281	11358
1.02927	13750.5		9.02913	11266.3		2.02956	12706.5		10.0289	11316.3		3.02785	12810.9		11.0292	11692.1		4.02847	12729		12.0291	11340.5		5.02981	13380.3		13.0294	11251.7		6.03079	13794.7		14.0293	11598.2		7.03035	12152.2		15.0297	11738.1		8.02941	12224.6		16.0298	11339
1.03073	13625.2		9.03017	11318.1		2.03095	12437.9		10.03	11105.2		3.0291	12652.2		11.0308	11574.4		4.02951	12758.9		12.03	11149.4		5.03113	13122.3		13.0306	11364.7		6.03225	13388.4		14.03	11423.6		7.03119	12279.4		15.0305	11638.5		8.03031	12122.3		16.0314	11312.7
1.03246	13381.7		9.03184	11263.1		2.03185	12247.5		10.0318	10965.4		3.03084	12483.6		11.0317	11406.8		4.03104	12673.3		12.031	11269.7		5.03189	13021.4		13.0316	11285.9		6.03309	13370		14.0315	11350.6		7.03264	11965.3		15.0319	11656.2		8.03184	12073.9		16.0324	10955.8
1.03364	13109.3		9.03343	10971		2.03324	12190.8		10.0335	10765.1		3.03237	12173.9		11.0328	11371.4		4.03277	12452.5		12.0326	10985.5		5.03314	12949.6		13.033	11038		6.0342	13204.5		14.0331	11254.5		7.03431	11611.8		15.0336	11332.1		8.03365	11810.5		16.0334	10705.2
1.03461	12928.6		9.03447	10646.2		2.03505	11927.5		10.0344	10585.5		3.03327	11988.7		11.0347	11207.3		4.03395	12169		12.0341	10743.6		5.03481	12746.6		13.0348	10900.1		6.03579	13098.2		14.0344	10976.3		7.03549	11498.7		15.0349	11097.3		8.03483	11455		16.0352	10596.5
1.036	12726.3		9.03552	10458.8		2.03637	11551.7		10.0353	10489		3.03445	11954.7		11.0363	10811.4		4.03485	11977.1		12.0352	10543.3		5.0362	12485		13.036	10638.4		6.03732	12709.1		14.0354	10701.3		7.03646	11423.2		15.0359	10981.3		8.03559	11368.9		16.0368	10541.7
1.03774	12532.5		9.03711	10347.5		2.0372	11360.8		10.0369	10325.5		3.03626	11638		11.0372	10441.5		4.03631	11735.2		12.0362	10454.7		5.03724	12228		13.0369	10398.2		6.03836	12311.8		14.0367	10508.5		7.03785	11346.7		15.0372	10758.8		8.03691	11299.4		16.0379	10369.8
1.03913	12304.7		9.03885	10153.8		2.03838	11249.8		10.0385	10119.1		3.03785	11275.5		11.0381	10531.3		4.03812	11566.7		12.0378	10265.2		5.03835	12064.6		13.0382	10374.1		6.03947	12148.7		14.0384	10395.4		7.03959	11028.2		15.0389	10505.7		8.03865	10969.3		16.0389	10061.1
1.0401	11981.6		9.04003	9888.3		2.04005	11156.3		10.0396	9859.28		3.03869	11111.6		11.0397	10418.7		4.03944	11254.3		12.0395	9906.21		5.04009	11948.9		13.0398	10152.8		6.04107	12059.2		14.0399	10024.8		7.04098	10728.1		15.0404	10318.5		8.03997	10599.2		16.0405	9886.69
1.04135	11865.8		9.041	9656.18		2.04151	10778.7		10.0407	9614.42		3.03966	10863.3		11.0413	10167.3		4.04034	10980.9		12.0408	9810.78		5.04168	11678.4		13.0412	9819.56		6.04274	11794.7		14.0409	9838.63		7.04195	10538.3		15.0414	10138.4		8.04087	10445.7		16.0423	9624.23
1.04309	11670.6		9.04246	9548.91		2.04248	10628		10.0421	9443.29		3.04133	10737		11.0424	9920.5		4.04173	10783		12.0417	9611.26		5.04273	11337.4		13.0422	9646.25		6.04385	11454.2		14.042	9668.46		7.0432	10440.5		15.0426	9970.78		8.04219	10341.3		16.0432	9327.9
1.04461	11373.1		9.0442	9288.08		2.04366	10334.9		10.0439	9257.99		3.04285	10528.9		11.0434	9617.41		4.04354	10667.7		12.0431	9486.38		5.04377	11188.6		13.0434	9552.71		6.04482	11201.2		14.0438	9402.1		7.04494	10111		15.0442	9826.59		8.04392	10044.3		16.0441	9178.13
1.04559	11121.7		9.04552	9143.93		2.04532	10142.3		10.0453	9043.12		3.04389	10307		11.0449	9538.51		4.04479	10389.5		12.0449	9154.71		5.04536	11008.2		13.0451	9231.96		6.04635	10948.3		14.0454	9271.67		7.04646	9801.93		15.0458	9493.3		8.04545	9781.54		16.0457	9132.25
1.04677	10845.2		9.04642	8963.67		2.04699	9940.12		10.0462	8899.07		3.04494	10012.9		11.0467	9262.85		4.04562	10062		12.0462	8881.45		5.0471	10668.5		13.0467	8955.07		6.04816	10673.4		14.0463	9040.05		7.04744	9535.05		15.0468	9224.53		8.04642	9603.27		16.0473	8878.19
1.04857	10583.8		9.04781	8863.4		2.04803	9596.11		10.0475	8603.42		3.04653	9695.11		11.0479	9028.6		4.04687	9922.15		12.0472	8755.47		5.04821	10245.8		13.0477	8756.45		6.04934	10278		14.0474	8885.45		7.04862	9418.67		15.0479	9074.72		8.04753	9343.62		16.0484	8561.73
1.0501	10123.6		9.04968	8663.24		2.04901	9316.57		10.0493	8319.03		3.04827	9513.55		11.0489	8774.77		4.04854	9759.31		12.0485	8468.45		5.04918	10154.1		13.0488	8598.34		6.05024	10133.7		14.0492	8621.01		7.05042	9114.03		15.0496	8888.75		8.04927	9119.23		16.0494	8439.13
1.051	9912.66		9.05093	8359.6		2.05067	9144.9		10.0507	8134.82		3.04945	9252.66		11.0503	8635.13		4.04992	9388.88		12.0504	8248.04		5.05078	9810.35		13.0505	8345.21		6.05177	9933.44		14.0508	8305.86		7.05195	8805.7		15.0513	8608.03		8.05087	8896.28		16.0509	8285.8
1.05205	9835.37		9.0517	8028.87		2.05241	8840.37		10.0516	7980.01		3.05042	9121.43		11.0521	8489.54		4.0509	9221.79		12.0517	7936.23		5.05252	9675.2		13.0521	8076.81		6.05357	9572.2		14.0517	8116.58		7.05278	8613.46		15.0522	8334.45		8.05191	8687.54		16.0526	8145.66
1.05364	9506.99		9.05302	7852.77		2.05352	8505.24		10.0529	7794.22		3.05188	8903.96		11.0534	8086.33		4.05208	9051.25		12.0525	7801.11		5.05363	9288.75		13.0532	7772.42		6.05475	9246.7		14.0527	7949.65		7.05382	8457.53		15.0532	8125.17		8.05302	8490.91		16.0539	7742.25
1.05517	9251.9		9.05475	7608.42		2.05449	8436.78		10.0547	7451.23		3.05369	8573.98		11.0543	7779.17		4.05374	8785.4		12.0537	7729.74		5.05446	9115.29		13.0542	7675.56		6.05552	9098.39		14.0543	7794.6		7.05549	8268.35		15.0548	7993.68		8.05469	8228.79		16.0548	7615.95
1.05628	8905.22		9.05607	7426.08		2.05609	8174.86		10.0561	7249.89		3.05494	8280.93		11.0557	7710.3		4.05541	8509.23		12.0554	7532.49		5.05592	8895.67		13.056	7609.32		6.0569	8851.1		14.0559	7539.23		7.05702	8097.62		15.0564	7744.79		8.05635	7914.2		16.0562	7502.39
1.05732	8585.64		9.05704	7192.39		2.05789	7888.81		10.0569	7109.22		3.05584	8135.29		11.0575	7492.48		4.05645	8235.86		12.0569	7189.18		5.05759	8669.08		13.0576	7310.13		6.05864	8602.07		14.057	7254.62		7.05813	7806.07		15.0575	7525.41		8.05733	7698.32		16.058	7227.93
1.05892	8480.32		9.05822	7066.71		2.05894	7639.14		10.058	6878.89		3.0573	8003.89		11.0589	7198.21		4.05749	7983.16		12.0578	6978.1		5.05877	8373.99		13.0586	7021.37		6.05989	8292.27		14.0579	7186.45		7.05917	7528.71		15.0585	7284.25		8.05823	7527.83		16.0594	6882.9
1.06066	8259.07		9.05996	6870.74		2.05977	7249.8		10.0598	6723.44		3.0591	7706.16		11.0597	6988.08		4.05909	7804.53		12.059	6914.35		5.05974	8077.51		13.0595	6915.28		6.06086	8077.05		14.0595	6923.71		7.0607	7327.75		15.06	7133.35		8.05976	7340.81		16.0603	6620.43
1.06184	8026.75		9.06156	6724.89		2.06123	7184.5		10.0612	6517.03		3.06035	7399.13		11.0609	6856.71		4.06083	7468.14		12.0607	6718.45		5.06113	7917.48		13.061	6824.13		6.06218	7866.54		14.0613	6782.08		7.06237	7253.58		15.0617	6909.78		8.06142	7167.51		16.0616	6413.71
1.06281	7739.97		9.06253	6447.14		2.06289	7073.17		10.0623	6275.82		3.06119	7223.34		11.0626	6611.8		4.06194	7152.69		12.0623	6335.51		5.06293	7741.45		13.0626	6537.36		6.06392	7716.65		14.0625	6528.34		7.06362	6917.21		15.063	6715.02		8.06254	6839.14		16.0634	6285.19
1.06427	7479.97		9.06364	6227.45		2.06414	6745.36		10.0634	6141.74		3.06244	7079.23		11.064	6346.7		4.06291	7082.3		12.0633	6088.85		5.06439	7374.88		13.0637	6256.9		6.06538	7384.48		14.0634	6279.17		7.06452	6687.54		15.0639	6474.92		8.06351	6684.15		16.0648	6028.4
1.06607	7130.49		9.06538	6082.19		2.06512	6631.48		10.065	6025.08		3.06417	6823.45		11.0651	6078.3		4.06451	6937.9		12.0644	6032.28		5.06529	7061.33		13.0648	6071		6.06635	7024.87		14.0648	6067.68		7.06598	6547.82		15.0653	6226.22		8.06503	6589.18		16.0657	5928.64
1.06732	6970.15		9.06704	5773.8		2.06644	6489.74		10.0667	5864.08		3.06549	6552.91		11.0663	6058.65		4.06624	6642.74		12.066	5871		5.06648	6905.79		13.0662	5920.79		6.06753	6900.95		14.0666	5963.77		7.06778	6180.74		15.0671	6017.64		8.06677	6388.19		16.0668	5795.28
1.06823	6762.48		9.06809	5566.17		2.06824	6231.46		10.0678	5533.06		3.06646	6299.44		11.0679	5964.63		4.06729	6389.34		12.0677	5577.52		5.06821	6706.41		13.068	5693.95		6.06927	6659.58		14.0679	5680.49		7.0691	6049.58		15.0685	5793.11		8.06809	6070		16.0684	5574.23
1.06968	6514.8		9.06913	5465.68		2.06963	5901.69		10.0688	5348.47		3.06764	6145.38		11.0695	5662.57		4.06812	6150.59		12.0688	5294.58		5.06974	6409.84		13.0693	5375.35		6.07086	6392.3		14.0688	5413.9		7.07001	5831.87		15.0694	5585.84		8.06899	5886.52		16.07	5275.47
1.07156	6420.64		9.07079	5337.08		2.0706	5686.68		10.0703	5212.35		3.06938	5990.14		11.0706	5453.86		4.06965	6075.38		12.0698	5212.51		5.07071	6118.69		13.0702	5248.36		6.07184	6045.53		14.0702	5287.78		7.07139	5665.43		15.0708	5501.04		8.07031	5664.84		16.071	5149.76
1.07281	6116.23		9.07246	5047.02		2.07178	5516.72		10.0721	4976.35		3.07098	5751.02		11.0716	5246.13		4.07124	5857.42		12.0714	5102.11		5.07189	5954.89		13.0715	5123.63		6.07295	5952.04		14.072	5165.11		7.07327	5548.92		15.0726	5266.93		8.07212	5496.77		16.0721	5060.56
1.07357	5890.5		9.07343	4837.67		2.07352	5376.51		10.0732	4824.4		3.07202	5417.74		11.0733	5050.21		4.07249	5557.3		12.0732	4857.5		5.0737	5763.55		13.0733	4973.52		6.07468	5805.37		14.0734	4907.25		7.07452	5248.07		15.0739	5073.6		8.07358	5153.21		16.0737	4913.97
1.07489	5729.58		9.07434	4820.64		2.07512	5147.9		10.0741	4713.65		3.07306	5302.8		11.075	4890.32		4.07347	5393.77		12.0742	4647.83		5.07529	5490.9		13.0748	4720.15		6.07635	5453.97		14.0742	4753.91		7.07535	4988.35		15.0747	4888.95		8.07448	4968.18		16.0754	4692.38
1.07656	5440.71		9.07586	4595.25		2.07609	4821.41		10.0757	4595.22		3.07473	5181.34		11.0761	4602.18		4.07486	5151.13		12.0751	4522.86		5.07613	5292.11		13.0757	4609.43		6.07725	5179.64		14.0754	4656.3		7.0766	4842.81		15.0759	4791.32		8.0758	4840.44		16.0765	4467.85
1.07795	5166.82		9.07753	4328.55		2.0772	4673.53		10.0775	4377.12		3.07639	4928.14		11.0771	4535.52		4.07659	4949.19		12.0765	4393.93		5.0771	5185.02		13.077	4418.08		6.07816	5071.13		14.077	4528.15		7.07827	4738.37		15.0776	4650.26		8.0776	4672.74		16.0775	4284.83
1.07892	4999.61		9.07871	4156.35		2.07901	4560.25		10.0787	4129.4		3.07744	4708.56		11.0787	4314.13		4.07798	4785.22		12.0782	4203.72		5.07877	5137.3		13.0788	4181.44		6.07975	4938.16		14.0785	4218.08		7.07966	4484.81		15.079	4378.05		8.07899	4445.04		16.079	4080.86
1.08017	4817.55		9.07961	3948.94		2.0806	4263.97		10.0795	3948.57		3.07848	4530.35		11.0804	4115.96		4.07895	4511.36		12.0794	4025.17		5.0803	4734.99		13.0803	3899.38		6.08142	4650.03		14.0795	4042.14		7.08063	4237.77		15.0801	4181.62		8.07983	4300.81		16.0808	3925.29
1.08184	4544.65		9.08107	3844.94		2.08144	4038.84		10.0809	3826.08		3.08014	4442.14		11.0815	3840.9		4.0802	4364.63		12.0804	3826.42		5.08141	4457.72		13.081	3650.23		6.08246	4417.18		14.0806	3928.13		7.08188	4053.53		15.0812	4018.61		8.08094	4121.11		16.082	3742.44
1.08343	4311.14		9.08281	3723.35		2.08241	3917.99		10.0825	3657.03		3.08188	4118.33		11.0824	3706.08		4.08201	4203.85		12.0817	3682		5.08245	4263.87		13.0821	3672.96		6.08343	4156.69		14.0823	3763.12		7.08355	3922.65		15.0828	3838.11		8.0826	4015.66		16.0829	3525.03
1.08448	4101.22		9.0842	3459.18		2.08407	3834.57		10.0839	3481.25		3.08285	3911.53		11.0838	3502.68		4.08354	3918.03		12.0835	3458.88		5.08398	4121.78		13.0838	3535.32		6.08496	4076.3		14.084	3507.09		7.08514	3683.4		15.0845	3637.69		8.08406	3704.75		16.0844	3390.89
1.08559	3939.48		9.0851	3252.59		2.0856	3547		10.0848	3293.06		3.08369	3835.86		11.0856	3342.57		4.08444	3723.73		12.0849	3264.26		5.08571	4005.22		13.0853	3389.51		6.08677	3812.23		14.085	3291.21		7.08612	3391.66		15.0855	3442.76		8.0851	3536.29		16.0862	3228.28
1.08725	3789.28		9.08642	3141.02		2.08671	3227.15		10.0862	3155.29		3.08521	3656.62		11.0867	3169.28		4.08562	3601.67		12.0859	3101.34		5.08696	3706.03		13.0863	3193.94		6.08802	3658.78		14.0861	3105.85		7.08723	3279.34		15.0866	3284.64		8.08622	3396.3		16.0875	2964.8
1.08892	3533.74		9.08822	3015.99		2.08775	3177.45		10.0879	2942.9		3.08688	3527.68		11.0877	3027.5		4.08742	3464.9		12.0872	2981.02		5.08786	3505.63		13.0874	3079.47		6.08892	3395.38		14.0877	3012.21		7.08889	3194.12		15.0882	3148.24		8.08788	3215.48		16.0882	2819.31
1.08996	3274.44		9.08968	2820.76		2.08928	3065.08		10.0894	2701.98		3.08806	3254.3		11.0891	2924.09		4.08895	3232.4		12.0889	2800.43		5.08925	3399.07		13.089	2940.85		6.09031	3236.35		14.0894	2776.27		7.09056	2961.93		15.0899	2974.45		8.08955	3019.9		16.0896	2725.37
1.091	3112.32		9.09058	2623.65		2.09102	2841.04		10.0904	2554.1		3.08903	3150.67		11.0908	2790.72		4.08979	2962.05		12.0904	2590.17		5.09106	3142.96		13.0907	2700.73		6.09211	2963.84		14.0905	2606.84		7.09167	2702.82		15.091	2691.66		8.09066	2830.38		16.0913	2620.31
1.09267	2966.76		9.09184	2522.22		2.09227	2614.33		10.0916	2429.22		3.09049	2927.25		11.0922	2554.8		4.09083	2881.71		12.0913	2382.65		5.09238	2859.8		13.0919	2484.92		6.09343	2739.3		14.0915	2481.01		7.09264	2629.34		15.092	2556.89		8.09163	2639.15		16.0926	2420.93
1.09434	2728.95		9.09371	2350.31		2.09317	2435.77		10.0932	2317.92		3.09223	2708.38		11.0932	2403.5		4.09242	2670.13		12.0925	2274.03		5.09328	2724.09		13.0928	2256.95		6.09434	2529.06		14.0931	2375.24		7.09431	2508.4		15.0936	2490.03		8.09323	2523.39		16.0935	2250.78
1.09538	2537.57		9.09517	2140.23		2.09463	2298.32		10.0948	2129.81		3.09362	2494.48		11.0944	2278.46		4.09395	2460.02		12.0943	2196.58		5.09467	2574.15		13.0944	2152.81		6.09566	2386.36		14.0948	2136.12		7.09605	2255.74		15.0953	2312.17		8.09496	2375.37		16.0948	2136.73
1.09621	2420.02		9.09593	1976.49		2.09637	2070.09		10.0958	1926.09		3.09452	2298.47		11.0962	2113.69		4.09506	2344.31		12.0959	1981.28		5.09654	2345.26		13.0962	2018.42		6.09753	2271.86		14.0959	1972.48		7.09702	2030.4		15.0964	2106.03		8.09615	2121.93		16.0966	1951.15
1.09774	2306.81		9.09704	1900.75		2.09769	1906.46		10.097	1884.78		3.09584	2165.05		11.0977	1916.72		4.09611	2210.21		12.0967	1803.29		5.09779	2066.74		13.0973	1825.76		6.09885	2044.41		14.0967	1842.61		7.09792	1899.78		15.0972	1955.43		8.09705	1979.01		16.098	1796.78
1.09934	2030.94		9.09871	1834.58		2.09866	1779.75		10.0987	1784.27		3.09758	2035.22		11.0987	1790.42		4.09763	2010.12		12.0978	1695.08		5.09856	1945.73		13.0982	1643.68		6.09968	1820.17		14.0981	1698.94		7.09945	1810.83		15.0987	1850.81		8.09865	1897.58		16.099	1624.31
1.10052	1850.65		9.10024	1643.47		2.10005	1696.11		10.1003	1565.83		3.09903	1816.82		11.0999	1706.14		4.09937	1805.47		12.0994	1569.86		5.09981	1862.19		13.0998	1575.72		6.10086	1721.19		14.0998	1538.02		7.10105	1665.57		15.1003	1671.13		8.10038	1695.41		16.1002	1552.91
1.10149	1715.2		9.10128	1452.84		2.10185	1499.9		10.1012	1389.31		3.10001	1651.2		11.1016	1602.67		4.10062	1634.05		12.101	1419.45		5.10154	1753.69		13.1016	1449.77		6.10253	1573.93		14.1011	1447.02		7.10223	1539.38		15.1016	1530.14		8.10156	1553.92		16.1019	1442.81
1.10295	1614.84		9.10232	1335.87		2.10317	1339.36		10.1022	1305.74		3.10126	1563.24		11.1032	1398.89		4.10152	1516.62		12.102	1307.99		5.10293	1613.79		13.1028	1289.13		6.10399	1400.65		14.102	1320.27		7.1032	1369.41		15.1026	1369.81		8.10233	1427.64		16.1035	1262.04
1.10475	1494.83		9.10392	1259.64		2.10394	1220.25		10.1038	1253.51		3.10306	1432.09		11.104	1220.9		4.10298	1429.7		12.1031	1217.49		5.10391	1469.06		13.1036	1201.93		6.10503	1266.38		14.1034	1229.48		7.10459	1293.46		15.1039	1288.6		8.10371	1299.98		16.1045	1160.85
1.10607	1283.73		9.10565	1161.05		2.10519	1187.55		10.1054	1131.82		3.10452	1259.38		11.1051	1177.29		4.10479	1337.42		12.1046	1116.95		5.10516	1316.82		13.1049	1101.56		6.10614	1192.2		14.1052	1106.5		7.10639	1169.9		15.1057	1239.69		8.10545	1196.8		16.1055	1067.49
1.10698	1150.88		9.10684	1031.02		2.10692	1057.49		10.1066	985.947		3.10535	1180.01		11.1067	1062.85		4.10604	1180.12		12.1063	979.275		5.10682	1186.32		13.1066	1008.83		6.10781	1097.88		14.1065	970.263		7.10778	1019.87		15.1071	1059.08		8.1067	1050.25		16.1073	942.471
1.1083	1075.36		9.10781	924.955		2.10831	890.981		10.1075	900.16		3.10639	1126.21		11.1083	953.872		4.10694	1019.07		12.1075	874.384		5.10842	1071.36		13.108	879.251		6.10947	967.114		14.1075	856.97		7.10869	901.953		15.108	902.463		8.10767	944.925		16.1089	810.154
1.1101	975.243		9.10934	847.185		2.10928	839.464		10.1091	876.347		3.10813	1032.83		11.1093	850.857		4.1084	956.989		12.1085	818.337		5.10946	917.911		13.1089	771.02		6.11059	818.543		14.1088	788.556		7.10994	839.509		15.1092	856.35		8.10899	871.643		16.1099	735.554
1.11149	826.059		9.11114	779.352		2.11046	762.953		10.1108	746.222		3.10959	909.406		11.1103	783.62		4.1102	861.196		12.1099	749.971		5.1105	794.625		13.1102	727.326		6.11156	741.719		14.1105	707.434		7.11174	794.309		15.111	785.359		8.11073	755.249		16.1108	663.072
1.11246	761.453		9.11232	647.391		2.1122	670.999		10.1121	629.04		3.11063	750.719		11.1119	716.414		4.11145	745.369		12.1117	669.293		5.11217	745.742		13.1119	662.231		6.11316	709.838		14.112	643.201		7.1132	646.093		15.1126	702.76		8.11219	638.178		16.1123	634.078
1.11371	709.59		9.11329	572.156		2.1138	585.299		10.113	592.969		3.11174	680.295		11.1137	643.964		4.11229	676.641		12.1131	572.6		5.11384	669.767		13.1135	610.118		6.11489	619.351		14.113	574.998		7.1141	570.873		15.1135	613.38		8.11316	583.864		16.114	556.797
1.11552	630.463		9.11482	539.028		2.11484	503.064		10.1144	541.974		3.11334	652.708		11.1149	578.35		4.11354	630.576		12.114	509.739		5.11495	565.926		13.1144	526.395		6.116	515.244		14.1141	540.519		7.11535	523.189		15.1147	576.99		8.11434	562.427		16.1151	474.261
1.11698	507.233		9.11656	483.658		2.11588	462.982		10.1162	498.841		3.11501	568.425		11.1158	482.749		4.11527	560.176		12.1153	466.039		5.11592	559.048		13.1155	460.62		6.11697	461.526		14.1159	463.056		7.11723	462.63		15.1164	507.618		8.11608	522.9		16.1161	438.87
1.11781	475.904		9.11774	422.571		2.11748	407.868		10.1175	407.722		3.11612	517.009		11.1172	447.942		4.11659	481.964		12.1172	435.628		5.11759	496.464		13.1173	426.001		6.11857	428.599		14.1175	393.968		7.11869	390.505		15.118	427.665		8.11767	446.958		16.1176	388.4
1.11892	449.57		9.1185	372.599		2.11921	371.708		10.1185	350.125		3.11709	460.897		11.119	398.003		4.11756	409.037		12.1185	375.483		5.11925	430.513		13.1189	371.365		6.12031	388.462		14.1184	360.276		7.11952	365.314		15.1189	353.536		8.11865	364.389		16.1194	351.383
1.12052	373.846		9.11989	341.822		2.12032	315.557		10.1198	346.352		3.11862	398.349		11.1203	329.263		4.11881	368.776		12.1192	315.038		5.12029	359.82		13.1199	318.891		6.12142	323.057		14.1193	329.645		7.12056	348.371		15.1199	353.438		8.11976	359.095		16.1207	292.781
1.12205	349.725		9.12156	303.508		2.1213	280.911		10.1216	296.998		3.12042	344.998		11.1212	286.434		4.12048	336.94		12.1205	300.72		5.12113	341.697		13.121	296.574		6.12225	287.723		14.121	301.42		7.12223	314.244		15.1215	344.047		8.12149	323.015		16.1216	269.17
1.12309	304.644		9.12288	283.416		2.12289	257.613		10.123	253.658		3.1216	319.1		11.1226	267.947		4.12208	307.773		12.1222	256.793		5.12266	319.705		13.1227	265.6		6.12364	263.81		14.1225	264.947		7.12383	257.643		15.1231	290.544		8.12316	282.796		16.123	255.352
1.1242	265.71		9.12385	262.942		2.12463	243.45		10.1237	240.42		3.12258	283.846		11.1244	249.081		4.12312	270.106		12.1236	225.842		5.12432	280.985		13.1244	238.681		6.12531	233.889		14.1236	218.267		7.1248	237.438		15.1242	242.946		8.12406	254.142		16.1248	234.655
1.1258	239.68		9.1251	229.701		2.12567	211.253		10.125	218.073		3.1241	262.167		11.1257	207.322		4.12416	264.893		12.1246	210.761		5.1255	236.462		13.1253	199.538		6.12663	192.861		14.1246	212.159		7.12591	224.235		15.1252	210.507		8.12497	220.164		16.1261	190.287
1.12753	235.812		9.12684	200.567		2.1265	191.411		10.1266	209.645		3.12591	228.312		11.1265	189.643		4.1259	243.059		12.1258	182.145		5.12648	217.277		13.1262	195.691		6.12753	187.4		14.1261	189.726		7.1275	200.358		15.1267	193.577		8.12656	210.662		16.127	178.045
1.12864	210.427		9.12836	186.025		2.12803	176.619		10.1281	187.454		3.12709	196.562		11.1278	185.205		4.12756	211.578		12.1275	177.8		5.12793	218.064		13.1278	186.944		6.12892	174.651		14.1279	183.031		7.12917	180.29		15.1285	186.386		8.12816	187.806		16.1283	179.473
1.12961	191.06		9.12934	187.621		2.1297	168.796		10.1291	167.395		3.12785	177.451		11.1295	167.082		4.12854	186.661		12.1291	155.943		5.12967	185.363		13.1294	156.9		6.13065	156.465		14.1291	162.14		7.13035	159.748		15.1297	179.879		8.12927	153.214		16.1301	161.851
1.13114	178.185		9.13052	159.614		2.13088	144.887		10.1303	142.29		3.12917	156.578		11.1309	156.145		4.12958	182.232		12.1301	150.816		5.13106	161.385		13.1305	150.178		6.13211	136.268		14.13	143.426		7.13132	143.313		15.1306	165.418		8.13024	141.362		16.1316	127.142
1.13295	157.792		9.13225	140.834		2.13185	127.7		10.1319	145.534		3.13091	150.792		11.1319	138.249		4.13131	166.569		12.1312	130.029		5.13196	155.111		13.1314	138.946		6.13302	135.057		14.1315	131.771		7.13278	133.832		15.1321	139.728		8.13177	132.892		16.1324	118.741
1.13413	143.778		9.13385	142.472		2.13324	137.759		10.1336	126.841		3.13223	137.396		11.1331	126.54		4.13298	155.048		12.1328	126.125		5.13321	137.903		13.133	116.624		6.1342	132.021		14.1333	109.305		7.13452	118.061		15.1338	142.65		8.13358	128.478		16.1335	124.059
1.1351	142.066		9.13489	129.463		2.13505	122.91		10.1346	118.643		3.13313	131.491		11.1348	118.395		4.13395	126.74		12.1345	107.277		5.13495	127.396		13.1347	111.524		6.13593	123.751		14.1346	109.099		7.13584	105.744		15.1351	123.907		8.13483	127.634		16.1352	113.573
1.13663	139.349		9.13593	118.673		2.13644	100.847		10.1357	118.037		3.13438	115.717		11.1364	107.122		4.13479	138.305		12.1356	97.2207		5.13648	124.646		13.136	116.421		6.13746	109.475		14.1355	104.304		7.13674	90.7849		15.136	117.217		8.13573	118.005		16.1366	98.3719
1.13843	126.057		9.13767	108.196		2.13734	95.5506		10.1373	110.003		3.13612	113.251		11.1374	92.7622		4.13631	133.411		12.1366	109.869		5.13738	112.114		13.1369	88.8911		6.13843	93.0753		14.137	100.385		7.13813	92.9888		15.1374	103.287		8.13712	117.325		16.1377	97.6412
1.13961	122.928		9.13934	98.3152		2.13859	95.5775		10.139	99.8601		3.13771	113.233		11.1385	82.6252		4.13798	112.613		12.1383	92.4848		5.13863	99.4068		13.1382	93.7762		6.13961	87.4149		14.1388	91.6557		7.14001	94.2831		15.1392	87.8622		8.13892	106.409		16.1388	96.2724
1.14038	106.573		9.14024	92.9053		2.14032	101.345		10.1401	85.7149		3.13869	107.256		11.1401	84.2566		4.13916	111.798		12.1399	92.619		5.14043	87.9994		13.1401	81.7007		6.14135	85.5927		14.14	84.4862		7.14126	83.4305		15.1405	87.6922		8.14031	89.7083		16.1405	78.8526
1.14177	99.6812		9.14121	105.037		2.14185	95.8847		10.1411	78.5961		3.1398	92.1299		11.1418	73.9706		4.14013	101.438		12.141	94.7603		5.14189	82.2197		13.1414	90.6716		6.14295	80.1857		14.1409	75.3364		7.14202	84.5131		15.1413	69.002		8.14122	80.2603		16.1421	81.7753
1.14343	96.4632		9.14274	94.644		2.14282	93.457		10.1427	74.6326		3.14153	95.2494		11.1429	74.236		4.14159	97.853		12.1418	77.8028		5.14273	76.9529		13.1424	82.9593		6.14385	74.1614		14.1421	76.3892		7.14334	85.2258		15.1426	62.7123		8.14253	71.9247		16.1432	72.1662
1.14482	98.2795		9.14433	86.9198		2.14401	72.879		10.1445	71.9217		3.14313	85.2527		11.1439	75.405		4.14333	80.6808		12.1433	79.0703		5.14377	84.3013		13.1437	71.4505		6.14482	72.4436		14.1438	71.7129		7.145	72.0947		15.1442	69.9027		8.14434	70.1502		16.1442	67.3677
1.1458	88.7241		9.14552	79.13		2.14581	71.9664		10.1455	71.7308		3.14417	87.8204		11.1456	72.706		4.14472	87.0391		12.145	74.9398		5.14543	76.0761		13.1455	76.091		6.14642	69.1034		14.1452	63.8008		7.14632	65.453		15.1457	73.9109		8.14573	75.074		16.1457	58.5639
1.14705	84.5846		9.14649	86.8154		2.14734	64.8655		10.1463	70.8093		3.14521	84.698		11.1473	60.6008		4.14562	80.475		12.1462	69.0646		5.14696	67.8091		13.1469	66.0763		6.14802	64.5434		14.1461	64.4152		7.1473	62.1576		15.1467	76.0403		8.14649	67.2215		16.1475	60.4398
1.14878	78.4649		9.14795	79.7085		2.14817	56.9146		10.1478	58.9903		3.14695	73.8811		11.1483	59.8433		4.14687	64.3257		12.1472	63.6875		5.148	66.9859		13.1477	53.3388		6.14913	57.5916		14.1473	62.0532		7.14855	60.0491		15.1478	67.317		8.14774	66.6132		16.1487	62.8256
1.15038	79.5803		9.14968	72.2318		2.14921	65.4322		10.1495	47.243		3.14862	61.1376		11.1492	54.4632		4.14867	69.8549		12.1486	49.7958		5.14904	67.0933		13.1489	60.3592		6.1501	51.2005		14.149	54.5497		7.15028	53.4343		15.1495	64.0275		8.14941	57.0399		16.1496	51.5524
1.15135	71.7457		9.151	65.1757		2.15088	60.2519		10.1507	55.1491		3.14952	70.3142		11.1507	61.9846		4.15013	68.3608		12.1503	54.1769		5.15064	58.3462		13.1505	62.5363		6.15163	57.8571		14.1506	43.1363		7.15181	50.4013		15.1511	65.2294		8.1508	52.2563		16.1512	49.265
1.15246	82.154		9.15191	74.6326		2.15241	53.5685		10.1517	63.2073		3.15042	62.6974		11.1524	52.1757		4.15104	68.9095		12.1517	53.2911		5.15238	52.4441		13.152	55.0746		6.15343	57.4216		14.1517	47.1803		7.15278	46.727		15.1521	53.3806		8.15184	52.2056		16.1529	56.1273
1.1542	73.6216		9.15329	79.7741		2.15345	52.0863		10.153	63.4489		3.15202	52.0087		11.1535	56.6731		4.15229	67.8896		12.1526	50.9202		5.15349	49.766		13.153	55.7754		6.15461	54.3916		14.1527	54.8926		7.15389	45.0599		15.1532	52.4233		8.15295	53.8965		16.154	55.7486
1.1558	72.4496		9.1551	75.4528		2.15449	62.2172		10.1548	56.682		3.15362	50.5712		11.1545	49.3038		4.15409	62.4588		12.154	42.513		5.15446	56.2138		13.1541	57.7914		6.15552	50.9232		14.1544	53.2106		7.15563	46.9328		15.1548	49.8734		8.15462	53.5029		16.1548	58.9754
1.15684	73.8334		9.15649	69.2346		2.15609	51.3407		10.1562	48.9101		3.15473	54.9612		11.156	47.8424		4.15555	60.4338		12.1557	41.6094		5.15592	50.2551		13.1558	43.4167		6.15697	50.8397		14.1561	40.3717		7.15723	47.0163		15.1565	59.891		8.15629	59.3452		16.1562	47.3802
1.15788	76.6457		9.15739	61.5074		2.15782	45.3492		10.1572	52.8527		3.15577	66.3626		11.1578	46.6793		4.15638	60.899		12.1572	46.6346		5.15773	55.2565		13.1575	39.2146		6.15878	52.6589		14.1571	38.7225		7.15827	40.9741		15.1576	53.9174		8.15733	49.8913		16.158	37.789
1.15961	65.3188		9.15871	62.0442		2.159	52.7304		10.1584	40.1361		3.15723	58.1076		11.1592	40.0317		4.15749	56.9773		12.1581	41.3499		5.15898	48.1854		13.1586	36.6736		6.1601	36.7034		14.1581	48.2301		7.15931	38.8805		15.1586	45.1792		8.15837	43.688		16.1592	46.2588
1.16121	60.9527		9.16059	60.7887		2.15998	49.4738		10.1602	42.856		3.15903	45.4655		11.1601	34.7739		4.15909	64.9162		12.1594	33.1903		5.15988	46.5063		13.1596	34.1774		6.16093	37.4282		14.1598	43.527		7.16105	46.5779		15.1603	46.6793		8.15997	47.2161		16.1602	42.5637
1.16218	82.2674		9.1619	67.3468		2.16144	50.61		10.1617	40.3777		3.16028	50.3565		11.1614	41.0129		4.16062	58.0181		12.1612	35.6358		5.16134	42.9723		13.1612	34.8633		6.16239	53.2524		14.1615	38.2453		7.16271	48.4061		15.162	43.1184		8.1617	42.8112		16.1615	39.4502
1.16309	73.0132		9.16274	72.879		2.16324	52.131		10.1627	40.1629		3.16126	57.3739		11.1631	33.9329		4.16166	53.3836		12.1626	43.4733		5.16314	35.8087		13.1629	36.8287		6.1642	47.0909		14.1625	45.9665		7.16369	36.6826		15.163	39.471		8.16281	41.678		16.1632	37.8606
1.16468	74.7728		9.16385	65.6558		2.16449	51.281		10.1638	33.7211		3.16258	46.557		11.1646	29.4982		4.16277	52.5992		12.1635	54.1858		5.16439	42.522		13.1641	31.7319		6.16552	45.7429		14.1634	43.1035		7.16459	40.3628		15.1639	46.5063		8.16378	34.8932		16.1647	35.0811
1.16628	74.7519		9.16552	60.0491		2.16539	43.861		10.1656	44.5112		3.16438	48.6536		11.1656	35.9042		4.16437	57.535		12.1646	46.5541		5.16523	44.9287		13.165	29.6771		6.16628	39.4621		14.1649	33.7867		7.16612	40.6908		15.1653	48.418		8.16538	42.4444		16.1657	41.9941
1.16739	59.7956		9.16697	58.042		2.16685	45.218		10.1671	40.5805		3.16577	48.1049		11.1667	36.5156		4.16611	56.017		12.1662	45.4178		5.16648	31.3204		13.1666	28.4991		6.16753	48.7013		14.1665	24.6757		7.16771	32.2628		15.167	49.3694		8.16719	50.112		16.1668	37.5236
1.16843	64.0722		9.16802	61.2271		2.16866	52.307		10.168	36.7691		3.16674	46.2528		11.1685	36.9599		4.16722	51.1021		12.1678	42.4832		5.16821	33.569		13.1684	22.1437		6.1692	41.1262		14.1677	28.8599		7.16889	34.249		15.1682	55.6442		8.16823	39.307		16.1686	32.3731
1.16989	73.058		9.1692	69.175		2.16991	48.5224		10.1691	50.0583		3.16799	48.2271		11.1701	44.2249		4.16812	55.2982		12.1688	44.7855		5.16953	40.8697		13.1695	28.1144		6.17065	40.7594		14.1687	33.566		7.16994	33.5899		15.1692	53.7772		8.16906	37.3238		16.1701	35.4628
1.17163	59.5958		9.17079	65.8706		2.17074	45.3283		10.1707	41.6452		3.1698	45.0062		11.1709	35.928		4.16972	55.0417		12.1699	40.9413		5.1705	30.9505		13.1703	32.0749		6.17163	45.3462		14.1701	29.9336		7.17132	35.7073		15.1706	49.7511		8.17052	37.3596		16.1711	36.1964
1.17295	52.638		9.17246	53.485		2.17199	43.6165		10.1723	40.7952		3.17126	43.5717		11.1719	35.5582		4.17145	54.1888		12.1715	30.6553		5.17175	32.7131		13.1717	31.9854		6.17281	43.1602		14.1718	31.9526		7.17306	40.321		15.1723	32.4536		8.17219	33.6376		16.1723	38.5167
1.17385	55.9126		9.17357	57.2606		2.17373	37.6638		10.1733	32.8831		3.17202	38.4421		11.1736	30.2288		4.17263	55.328		12.1732	35.4867		5.17349	35.2182		13.1734	37.8427		6.17454	34.8932		14.1732	39.6768		7.17445	43.5538		15.1737	37.9262		8.17344	27.4135		16.174	36.3545
1.17524	71.1851		9.17461	61.242		2.17512	44.0519		10.1744	36.2263		3.1732	45.8025		11.1751	28.7227		4.1736	50.1239		12.1744	37.2164		5.17509	32.0868		13.1746	41.3499		6.17614	40.4701		14.1742	46.8046		7.17535	39.5456		15.1746	39.5367		8.17441	35.3047		16.1756	34.2281
1.17705	77.1408		9.17621	54.663		2.17609	44.1145		10.1759	36.8317		3.17487	45.8711		11.1762	34.3772		4.17513	55.2058		12.1753	40.5119		5.17606	45.7309		13.1756	33.7897		6.17718	35.8982		14.1754	38.3497		7.17667	34.0164		15.176	31.6931		8.17573	41.2306		16.1765	39.8379
1.17843	63.8456		9.17795	55.6919		2.17734	54.4334		10.1777	41.8122		3.17633	50.2253		11.1772	28.9643		4.17694	56.0736		12.1768	36.8377		5.1771	41.4602		13.177	31.204		6.17823	41.1859		14.1772	39.1519		7.17848	31.1146		15.1777	34.5055		8.17747	44.3352		16.1775	38.8209
1.17934	53.8965		9.17906	64.0722		2.17907	52.3636		10.1789	39.8349		3.17737	42.8023		11.1788	31.0758		4.17812	44.7169		12.1786	39.0833		5.17884	36.101		13.1787	34.5234		6.17989	35.7998		14.1787	31.7886		7.17987	35.1705		15.1792	47.2072		8.17892	41.3917		16.179	31.1921
1.18066	55.7993		9.18003	62.8137		2.18067	55.3668		10.1798	32.2121		3.17848	37.8994		11.1806	30.6583		4.17888	42.5249		12.1799	39.6052		5.1805	33.4587		13.1802	35.0035		6.18156	35.7044		14.1796	28.6422		7.18077	36.1964		15.1801	39.6649		8.17983	31.1921		16.1806	31.7677
1.18246	56.1333		9.18163	59.7329		2.18164	56.6671		10.1812	34.1834		3.18008	37.3267		11.1817	36.608		4.18027	47.9826		12.1808	33.4497		5.18154	33.1485		13.1811	40.3329		6.18267	40.4701		14.1809	29.2178		7.18209	32.1196		15.1813	41.4752		8.18108	37.1866		16.1818	38.5137
1.18385	65.1369		9.18336	56.7596		2.18269	55.1998		10.183	37.8069		3.18181	44.5022		11.1827	32.6684		4.18194	54.3976		12.1823	41.168		5.18259	34.8276		13.1823	34.0283		6.18364	36.2054		14.1827	39.6052		7.18389	32.558		15.1831	43.5002		8.18281	35.2451		16.1828	33.1813
1.18468	66.1688		9.18447	60.5083		2.18442	44.6245		10.1844	44.8273		3.18292	51.0305		11.1842	35.2868		4.18326	53.3597		12.1841	43.1751		5.18425	37.449		13.1841	29.1671		6.18524	37.4371		14.1841	42.2893		7.18535	34.0432		15.1846	46.7032		8.18434	33.2499		16.1843	35.8386
1.1858	55.3847		9.18531	58.9098		2.18609	42.3311		10.1853	38.9312		3.18389	49.9569		11.186	39.1072		4.18423	54.4841		12.1853	38.0216		5.18599	44.9048		13.1856	33.6346		6.18704	38.0693		14.1849	40.0347		7.18612	32.221		15.1855	41.499		8.18531	45.9486		16.186	36.6706
1.18746	56.6104		9.1867	64.7969		2.18713	48.7699		10.1866	31.5291		3.18542	47.1058		11.1872	32.6475		4.18548	48.588		12.1861	29.5608		5.18689	43.1184		13.1866	37.9471		6.18809	35.0542		14.1861	36.9599		7.18723	31.374		15.1865	33.1097		8.18649	37.2283		16.1873	36.6438
1.18899	61.6357		9.18836	68.7246		2.18817	45.8204		10.1885	39.3905		3.18716	40.3806		11.1881	29.0627		4.18722	45.3432		12.1875	42.7546		5.18779	42.3699		13.1877	28.7645		6.18885	38.7553		14.1877	29.9783		7.18896	30.2229		15.1882	31.1026		8.1883	36.4947		16.1882	41.1948
1.19003	57.4216		9.18968	58.3253		2.18984	46.6346		10.1898	38.4541		3.18834	46.8732		11.1896	28.8092		4.18874	47.0998		12.1892	35.5314		5.18932	46.3155		13.1895	29.0598		6.19031	24.9143		14.1892	37.5295		7.19042	31.8214		15.1897	42.3758		8.18983	41.1262		16.1896	39.8737
1.19114	53.98		9.19059	53.0257		2.19157	54.323		10.1905	40.4164		3.18931	50.1		11.1914	43.4614		4.18972	50.0404		12.1905	30.8134		5.19099	29.2208		13.1911	32.0451		6.19204	27.2644		14.1902	37.4282		7.19146	37.8874		15.1908	38.2602		8.19073	40.0526		16.1914	39.6261
1.19274	61.2867		9.19191	58.8412		2.19255	44.1533		10.1918	49.6915		3.19091	48.5433		11.1926	38.0485		4.19083	46.1365		12.1915	26.5218		5.1921	31.7438		13.192	42.3937		6.19322	24.2254		14.1913	31.21		7.19257	33.1097		15.1918	33.9806		8.19177	46.7897		16.1928	39.9482
1.19448	63.0791		9.19371	54.8896		2.19338	49.2888		10.1935	37.2522		3.19264	44.705		11.1934	37.3715		4.19256	49.3992		12.1927	27.2316		5.19307	41.5348		13.193	39.3309		6.1942	32.4178		14.1929	39.0953		7.19417	33.7032		15.1934	35.0154		8.19337	43.6344		16.1937	36.9778
1.19559	64.8745		9.19517	51.8179		2.19491	42.2506		10.1949	32.2001		3.19376	44.9734		11.1947	30.4406		4.19416	49.8018		12.1944	43.7656		5.19453	42.4832		13.1946	30.536		6.19559	31.216		14.1947	38.3497		7.19591	22.5136		15.1951	38.5614		8.1949	37.8964		16.195	40.9741
1.19656	63.5443		9.19607	54.9165		2.19664	42.0806		10.1959	33.3811		3.19459	44.1742		11.1965	24.9829		4.1952	56.4524		12.196	41.4931		5.19634	34.082		13.1962	33.3125		6.19739	30.0439		14.1958	32.2866		7.19702	29.0747		15.1963	43.1781		8.19601	37.7115		16.1968	38.3676
1.19809	56.178		9.19725	59.4794		2.19782	44.4724		10.1971	34.6069		3.19598	45.5162		11.1978	25.1619		4.19624	43.527		12.197	40.652		5.19766	34.4607		13.1973	35.2182		6.19878	29.5548		14.1968	35.7968		7.19792	34.7679		15.1972	45.5192		8.19705	32.7727		16.1982	44.7676
1.19989	50.8158		9.19906	65.0266		2.19873	50.5623		10.1988	35.0542		3.19764	38.2423		11.1988	32.7578		4.19798	40.9741		12.1981	34.5204		5.19856	37.4878		13.1982	27.4732		6.19968	32.0659		14.1982	41.0427		7.19952	40.6252		15.1987	38.463		8.19858	34.5472		16.199	35.7103
1.20107	52.3248		9.20065	54.49		2.20019	48.4419		10.2004	37.9292		3.19896	33.7539		11.2	35.591		4.19965	40.828		12.1998	31.9258		5.19988	46.9537		13.1998	25.9373		6.20093	33.748		14.2	40.5059		7.20125	38.3706		15.2005	41.8837		8.20031	34.4488		16.2002	39.5009
1.20198	49.268		9.20163	61.3583		2.20199	39.8737		10.2014	37.798		3.19994	42.9067		11.2017	36.6885		4.20062	42.3102		12.2015	37.0703		5.20168	37.1269		13.2015	29.3192		6.20267	33.6824		14.2013	29.853		7.20244	34.5562		15.2018	36.5484		8.20156	40.4612		16.2018	42.1313
1.20357	58.8263		9.20274	70.4454		2.20331	45.4655		10.2025	35.9549		3.20126	54.0934		11.2033	31.3114		4.20152	48.7043		12.2025	41.7525		5.20307	33.7927		13.2028	35.9638		6.2042	35.9907		14.2022	35.6358		7.20334	28.7317		15.2027	39.3309		8.20247	31.544		16.2033	43.1691
1.20538	57.7318		9.20447	61.2032		2.20421	41.2276		10.2041	37.3297		3.20299	50.9888		11.2043	28.6512		4.20305	44.8124		12.2035	33.5869		5.20404	34.7888		13.2037	38.809		6.2051	39.4919		14.2037	35.1765		7.20494	28.7973		15.2041	39.4233		8.20392	31.8124		16.2043	39.5128
1.20649	68.2147		9.20607	60.3085		2.20553	48.9399		10.2058	34.4458		3.20452	36.1308		11.2054	25.7881		4.20472	36.5603		12.2052	41.5408		5.2053	38.0962		13.2051	32.2687		6.20628	36.4947		14.2055	34.4279		7.20667	32.7101		15.2059	36.7333		8.20573	38.3079		16.2055	29.3073
1.20732	68.4383		9.20697	63.8038		2.20734	46.5749		10.2069	40.0108		3.20542	47.0312		11.2072	26.8946		4.20583	50.8933		12.2069	41.3767		5.2071	34.4071		13.2069	30.0976		6.20809	33.903		14.2067	32.2061		7.20785	34.7202		15.2071	35.3972		8.20705	45.1345		16.2071	29.7845
1.20871	66.0942		9.20795	72.1871		2.2088	46.1186		10.2079	37.1776		3.2066	49.6616		11.2088	35.2958		4.2068	47.917		12.2078	28.7794		5.20856	37.8069		13.2082	26.7067		6.20968	35.9787		14.2075	27.7058		7.20862	30.9684		15.208	38.1409		8.20795	41.4752		16.2088	35.0572
1.21038	50.8068		9.20954	73.6335		2.2097	37.0315		10.2096	34.5502		3.20834	44.2249		11.2098	33.0352		4.20826	42.4504		12.2087	30.3004		5.20932	44.1861		13.2091	33.5511		6.21052	34.7232		14.2088	23.5126		7.21	38.1111		15.2092	36.3963		8.20934	38.132		16.2098	31.1683
1.2117	52.2384		9.21114	80.7255		2.21095	43.5598		10.2113	39.8647		3.20994	37.959		11.2109	33.5034		4.21006	38.5525		12.2103	34.6904		5.21043	38.806		13.2105	36.3605		6.21149	35.9728		14.2105	25.2215		7.21174	39.99		15.211	41.0338		8.21115	43.7268		16.2109	33.4945
1.21267	55.5219		9.21225	70.6423		2.21275	48.9757		10.2123	34.4369		3.21091	44.1593		11.2126	29.5697		4.21131	43.7924		12.2119	33.9776		5.2121	34.5502		13.2123	29.6503		6.21315	39.9482		14.2118	32.9398		7.21299	30.4078		15.2123	40.652		8.21247	39.4114		16.2125	35.5821
1.21399	61.5343		9.21322	68.9394		2.21421	48.5015		10.2132	37.5773		3.21202	44.2129		11.2142	33.1008		4.21229	43.8521		12.2131	33.0233		5.21363	37.8158		13.2137	38.2602		6.21475	32.3284		14.2128	34.6158		7.21396	26.653		15.2133	38.4063		8.21323	36.5036		16.2142	28.2158
1.21573	55.1103		9.21475	70.6602		2.21505	49.4409		10.2146	34.2222		3.21376	41.332		11.2152	36.8168		4.2136	42.7725		12.2141	32.3254		5.21467	38.3348		13.2145	41.0547		6.21579	31.8154		14.214	31.8095		7.21528	31.8691		15.2145	34.8574		8.21448	37.9829		16.2153	33.1097
1.21725	51.1767		9.21656	71.7249		2.21616	41.1083		10.2163	43.0439		3.21542	38.0813		11.2161	29.5697		4.21541	45.7041		12.2156	38.9939		5.21578	38.7612		13.2157	40.3956		6.21684	35.8266		14.2158	30.876		7.21702	43.3749		15.2162	42.6383		8.21622	43.1244		16.2163	33.7331
1.21823	57.6006		9.21781	70.5767		2.21782	38.0962		10.2175	43.5389		3.21626	48.1973		11.2176	28.9494		4.2168	48.1794		12.2174	40.7355		5.21738	42.5786		13.2174	32.7936		6.21843	35.3375		14.2174	29.9485		7.21848	38.0604		15.2178	44.0072		8.21754	36.6677		16.2179	34.583
1.21934	66.476		9.21871	58.7518		2.21935	39.146		10.2185	37.3953		3.21723	52.1757		11.2193	28.338		4.21777	40.2643		12.2186	33.399		5.21904	30.7149		13.2189	34.2639		6.22017	28.4305		14.2184	39.7901		7.21952	33.8166		15.2188	52.8139		8.21851	34.5323		16.2196	30.4913
1.22107	60.3652		9.2201	60.231		2.22032	49.5423		10.2199	35.2839		3.21883	45.3164		11.2205	31.9556		4.21902	39.0416		12.2195	32.722		5.22023	33.3334		13.2198	32.5461		6.22135	39.0446		14.2194	33.1604		7.22063	35.3256		15.2199	53.7534		8.21976	27.6312		16.2207	32.8205
1.22267	56.3122		9.2219	64.2661		2.22144	43.2258		10.2216	36.1338		3.22042	43.7566		11.2215	41.2575		4.2209	51.9163		12.2209	39.1191		5.22113	30.8223		13.221	34.3802		6.22225	39.4174		14.2211	30.3123		7.22237	40.7445		15.2216	45.7995		8.22142	29.6652		16.2215	34.3444
1.22364	56.7506		9.22322	66.309		2.2231	40.1093		10.223	37.7801		3.22153	43.864		11.2229	44.6812		4.22229	57.9764		12.2227	33.1634		5.22266	29.4117		13.2227	36.1368		6.22371	29.6741		14.2228	35.5105		7.22396	33.9806		15.2232	45.2746		8.22302	31.2011		16.223	31.8124
1.22475	51.6389		9.22413	50.7949		2.22477	34.583		10.224	40.3956		3.22258	44.8601		11.2247	43.8103		4.22312	52.0415		12.2241	32.1315		5.22446	35.427		13.2243	40.1182		6.22552	32.9099		14.2238	34.422		7.22494	32.1017		15.2243	43.7417		8.22406	37.3148		16.2246	34.6337
1.22649	47.8275		9.22552	53.5953		2.22588	39.7096		10.2253	37.4639		3.2241	50.786		11.226	27.1451		4.22423	41.8032		12.225	33.3215		5.22564	33.062		13.2253	41.4006		6.22684	36.435		14.2249	28.9345		7.22605	34.7113		15.2253	43.8372		8.2251	39.0982		16.2259	34.0194
1.22809	59.3542		9.22732	63.8217		2.22685	52.808		10.227	43.7805		3.22584	43.3719		11.2269	29.2655		4.2259	41.4602		12.2262	33.6585		5.22661	30.9535		13.2264	24.795		6.22774	38.0664		14.2266	31.6782		7.22778	36.6378		15.227	41.9941		8.22677	38.5614		16.2268	31.1354
1.22899	61.74		9.22871	67.6808		2.22838	50.5921		10.2285	39.2235		3.22709	44.1145		11.2283	27.7028		4.22736	47.6277		12.2281	33.0441		5.22814	37.9769		13.228	30.879		6.22913	29.9395		14.2283	36.0115		7.22945	39.7066		15.2287	46.059		8.22844	32.051		16.2282	31.1325
1.22996	63.9261		9.22947	57.9972		2.23019	40.0645		10.2295	39.5575		3.22799	49.101		11.2301	28.5498		4.2284	43.9207		12.2295	27.9056		5.22988	38.4362		13.2298	46.2678		6.23093	29.3968		14.2292	38.4451		7.23035	32.8264		15.2296	41.9553		8.22955	35.7342		16.23	42.6234
1.23156	53.9621		9.23065	62.3723		2.23137	42.34		10.2307	44.2875		3.22945	45.4864		11.2315	28.5289		4.22951	48.8713		12.2303	30.3481		5.23106	38.2334		13.2308	38.0753		6.23218	41.8837		14.2301	33.3125		7.23126	32.737		15.2305	41.8569		8.23052	34.9797		16.2314	38.5793
1.23316	62.7928		9.23239	64.4629		2.23227	35.7342		10.2325	49.6229		3.23119	45.6683		11.2324	29.7636		4.23111	50.5533		12.2315	31.9377		5.23182	41.0099		13.2318	29.2178		6.23302	36.6677		14.2316	34.085		7.23285	30.4346		15.232	43.2437		8.23212	38.5376		16.2323	32.5371
1.23427	58.0658		9.23378	61.0631		2.2338	37.2761		10.234	45.1792		3.23258	52.5485		11.2337	33.0501		4.23284	43.4644		12.2331	33.2678		5.23321	45.1404		13.2334	34.2043		6.23427	34.7679		14.2333	28.9792		7.23445	31.3054		15.2337	42.5995		8.23392	47.2161		16.2335	37.9948
1.23531	54.8002		9.23475	69.3808		2.2356	50.4788		10.2348	38.2393		3.23348	42.683		11.2355	32.7519		4.23395	47.568		12.2347	36.8466		5.23488	36.7691		13.2352	32.1852		6.236	34.9051		14.2344	36.781		7.23563	26.3309		15.2348	39.8647		8.23497	34.7172		16.2353	39.9661
1.23684	56.011		9.23593	69.7178		2.23678	44.6841		10.2359	35.6179		3.23487	46.1216		11.2369	29.4057		4.23492	56.1184		12.2356	33.9388		5.2362	31.8095		13.2362	37.9799		6.23739	36.2859		14.2354	39.0147		7.2366	29.4564		15.2358	39.7991		8.2358	41.8569		16.2368	36.2054
1.23857	50.1895		9.2376	73.8453		2.23755	36.3635		10.2375	41.6988		3.23667	36.8675		11.2377	30.6046		4.23645	49.8793		12.2367	34.1327		5.23717	26.2504		13.2371	34.5711		6.23836	32.9338		14.2368	41.8927		7.23806	33.7629		15.2373	43.6224		8.23726	47.9229		16.2378	34.9797
1.23982	56.2287		9.2392	70.681		2.23894	36.5335		10.2391	38.8418		3.23799	41.7078		11.2388	33.739		4.23819	47.3981		12.2384	36.1577		5.23842	38.0664		13.2385	38.1141		6.23954	27.5447		14.2386	30.4107		7.23987	26.1222		15.239	43.9594		8.23899	43.1065		16.2389	32.1226
1.24073	64.6687		9.24024	77.1258		2.2406	43.5628		10.2401	34.1357		3.23883	45.9785		11.2405	30.5241		4.23937	52.9362		12.2401	34.3057		5.24016	49.5155		13.2403	37.8576		6.24128	28.4961		14.24	30.7686		7.24112	31.7886		15.2404	42.8828		8.24017	35.5195		16.2407	40.3806
1.24211	62.4379		9.24128	68.8529		2.24192	39.8915		10.2412	41.7943		3.24001	49.7899		11.242	32.4208		4.24034	52.8259		12.2412	35.0572		5.24168	41.9195		13.2414	28.848		6.24288	33.1783		14.2409	36.2919		7.24202	39.6261		15.2413	44.4038		8.24115	40.8847		16.2423	42.2088
1.24399	56.0587		9.24295	62.6437		2.24296	35.6537		10.2428	40.0377		3.24167	40.9592		11.2431	35.7998		4.24187	44.6692		12.2422	32.7429		5.24266	30.6583		13.2424	28.8957		6.24385	43.7328		14.2422	30.1215		7.24341	31.7975		15.2426	47.577		8.24247	36.5126		16.2432	37.2015
1.24531	59.5421		9.24468	69.1064		2.24421	37.6876		10.2445	36.9331		3.24313	36.6229		11.2442	36.3814		4.24367	47.9766		12.2437	41.5795		5.24384	43.7954		13.2438	26.1013		6.24489	37.8994		14.2439	31.1146		7.24521	25.5108		15.2444	36.0235		8.24427	35.928		16.2442	35.4121
1.24621	54.8688		9.24579	60.4487		2.24595	52.4799		10.2457	36.268		3.24417	37.3596		11.2458	31.7409		4.24479	40.6371		12.2455	47.6635		5.24557	38.9193		13.2455	28.5319		6.24663	37.4878		14.2454	40.0973		7.24653	33.399		15.2458	41.5288		8.24566	32.048		16.2458	37.6369
1.24753	54.5318		9.24677	55.6442		2.24748	43.02		10.2466	41.3499		3.24535	41.8092		11.2474	24.2582		4.24562	48.9101		12.2467	47.744		5.24717	34.759		13.2469	32.0958		6.24829	40.2017		14.2463	38.5107		7.24744	40.5685		15.2468	43.0021		8.24656	34.7291		16.2474	39.7245
1.24941	55.5905		9.24836	58.7726		2.24845	43.2705		10.2481	39.5456		3.24702	44.6036		11.2485	26.7574		4.24701	47.5949		12.2476	42.6025		5.24814	31.5858		13.2479	31.6037		6.24934	41.5855		14.2476	29.3103		7.24876	45.2299		15.248	45.8234		8.24781	47.5144		16.2484	34.9498
1.25073	51.8745		9.25017	67.1142		2.24956	48.2152		10.2499	30.4465		3.24862	47.4189		11.2496	27.0109		4.24867	45.0599		12.2492	41.168		5.24925	37.2134		13.2491	39.7096		6.25031	31.3054		14.2494	27.8907		7.25063	38.3288		15.2498	42.6979		8.24962	50.3893		16.2495	31.2219
1.25156	53.7504		9.25121	69.9802		2.2513	46.5839		10.2512	38.1499		3.24966	46.3662		11.2511	28.4275		4.24999	52.1906		12.251	41.2246		5.25099	39.7156		13.2509	38.4899		6.25198	31.9258		14.2509	32.1763		7.25195	33.5243		15.2512	42.8769		8.25115	41.3648		16.251	30.2885
1.25274	53.1032		9.25204	64.0006		2.25289	47.4935		10.2521	41.4543		3.25063	50.1895		11.2528	30.6911		4.25097	36.5156		12.2522	38.4332		5.25259	49.7004		13.2524	35.4091		6.25371	31.5142		14.2517	39.0535		7.25278	34.2579		15.2521	43.3302		8.25205	39.4651		16.2528	31.3233
1.25441	46.7777		9.2535	65.1548		2.25394	45.546		10.2535	39.0684		3.2523	41.1501		11.254	31.2249		4.25222	37.7801		12.253	29.2983		5.25356	43.3958		13.2533	38.2751		6.25468	38.5704		14.2528	41.7943		7.25389	36.4947		15.2532	44.4664		8.25323	40.3926		16.254	33.8553
1.25586	43.3451		9.25517	64.9639		2.25498	43.2914		10.2553	32.7578		3.25403	45.1494		11.255	36.441		4.25395	39.2414		12.2544	31.5679		5.25446	34.2013		13.2545	29.5131		6.25552	43.2317		14.2545	39.1549		7.25563	29.2089		15.2548	41.7287		8.25504	42.0179		16.2549	30.5092
1.25691	59.3721		9.25635	64.7522		2.25678	38.9014		10.2566	30.2825		3.25514	49.608		11.2565	38.9819		4.25548	40.8847		12.256	36.775		5.25599	29.015		13.2563	36.271		6.25704	35.2421		14.2559	37.628		7.25709	25.8388		15.2564	54.8568		8.25656	35.5702		16.2564	37.5981
1.25802	53.7951		9.25732	75.6615		2.25845	41.9672		10.2574	35.3614		3.25605	53.1569		11.2583	39.3547		4.25638	40.5208		12.2574	39.5873		5.25766	35.2749		13.2578	37.8129		6.25864	32.3522		14.257	29.1045		7.25806	37.7234		15.2573	47.3712		8.2574	29.2864		16.2582	37.8158
1.25968	48.2063		9.25871	65.2801		2.25935	49.101		10.2587	35.5463		3.25764	47.58		11.2594	33.0799		4.25756	46.7151		12.2583	35.4419		5.25877	36.2054		13.2587	31.037		6.25982	42.7874		14.2581	36.4559		7.25924	37.1925		15.2585	39.1102		8.25844	36.3635		16.2594	36.4947
1.26135	52.8975		9.26045	57.86		2.26026	44.0161		10.2604	37.3834		3.25945	36.5871		11.2603	34.8097		4.2593	49.7779		12.2597	29.4713		5.25974	38.2036		13.2597	35.2332		6.26079	42.3162		14.2597	38.3885		7.26084	26.2146		15.2601	46.1186		8.2601	40.8697		16.2603	45.1911
1.26239	62.089		9.2619	67.812		2.26185	40.9831		10.2617	38.7314		3.26049	35.7938		11.2617	32.4328		4.2609	49.4797		12.2614	31.3532		5.2612	33.9001		13.2614	28.5557		6.26225	40.2017		14.2614	42.6591		7.26251	29.8083		15.2618	47.7858		8.26163	39.3816		16.2617	37.1806
1.26343	57.8988		9.26281	73.8095		2.26352	33.1038		10.2627	35.4598		3.26139	47.2221		11.2633	31.5381		4.26194	46.4676		12.2629	33.7778		5.263	43.3033		13.263	28.681		6.26399	35.5493		14.2625	41.6243		7.26362	32.2001		15.2629	47.6784		8.26267	36.5543		16.2636	34.6069
1.26503	57.9525		9.26406	69.2823		2.26463	40.5506		10.2639	38.6181		3.26285	59.5242		11.2647	32.6773		4.26305	43.5866		12.2639	38.0753		5.26425	32.1882		13.264	29.5548		6.26538	37.0852		14.2635	39.5277		7.26459	38.9462		15.2639	41.5557		8.26372	30.9774		16.2648	30.0141
1.26677	65.0534		9.26579	71.4415		2.2656	40.4761		10.2656	35.427		3.26452	49.0353		11.2656	26.1729		4.26479	46.1872		12.2651	34.8335		5.26522	38.3795		13.2651	33.4885		6.26628	38.2781		14.265	41.5229		7.26619	34.0044		15.2654	36.7392		8.26531	26.826		16.2656	35.5195
1.26788	49.6109		9.26732	62.6437		2.26713	38.5376		10.2672	32.9666		3.26577	43.9803		11.2669	29.7546		4.26638	44.5529		12.2668	32.2598		5.26661	43.4495		13.2666	35.7909		6.2676	37.792		14.2668	43.4972		7.26792	35.8565		15.2672	32.7459		8.26698	34.8723		16.2668	37.3983
1.26885	42.9961		9.26829	65.6707		2.26894	37.6131		10.2682	38.3497		3.26674	51.6658		11.2686	35.2809		4.26729	41.2485		12.2683	34.3653		5.26835	40.0347		13.2683	38.8567		6.26934	33.572		14.268	35.9221		7.26903	39.1728		15.2684	33.9836		8.26816	39.6381		16.2685	35.8386
1.27045	65.2771		9.26947	68.9662		2.27026	49.1755		10.2693	35.8177		3.26806	44.034		11.2701	36.3843		4.26819	38.8746		12.2693	32.7966		5.26974	39.7484		13.2696	36.6736		6.27079	37.9411		14.2689	34.6576		7.27	45.543		15.2693	38.3228		8.26913	31.1504		16.27	34.4846
1.27225	61.2629		9.27128	71.6115		2.27116	42.8262		10.271	33.5541		3.26987	48.4955		11.2711	38.5793		4.26979	43.7179		12.2704	35.0125		5.27064	40.1629		13.2705	29.686		6.27177	36.8973		14.2704	38.7105		7.2716	38.2632		15.2708	40.5447		8.27059	33.9657		16.2709	30.2079
1.2733	57.3709		9.27281	64.0156		2.27255	37.628		10.2727	41.508		3.27126	44.8899		11.2723	37.7055		4.27138	49.8197		12.2722	41.2038		5.27196	28.514		13.2719	29.8769		6.27302	33.6764		14.2723	33.8016		7.27334	39.1042		15.2726	44.7557		8.2724	39.0476		16.2721	27.324
1.27413	63.6189		9.27371	79.7891		2.27435	44.4784		10.2737	43.858		3.27223	38.6956		11.274	38.7404		4.27249	44.7826		12.2738	39.4919		5.27377	29.4564		13.2737	26.7037		6.27482	40.995		14.2734	43.2198		7.27445	35.2332		15.2738	46.396		8.27365	44.3919		16.2738	25.9074
1.27559	55.7843		9.27468	88.5273		2.27567	44.8512		10.2748	42.3728		3.27341	45.4774		11.2756	42.5786		4.27354	37.0613		12.2747	35.6149		5.27516	40.8131		13.2751	32.0152		6.27628	35.8117		14.2743	35.9608		7.27528	35.8087		15.2746	36.8466		8.27455	46.6704		16.2754	37.0076
1.27725	52.5664		9.27635	76.6457		2.27657	40.7087		10.2764	32.6743		3.27521	40.9264		11.2766	34.6397		4.27506	51.9789		12.2757	37.1538		5.27599	42.006		13.276	38.7255		6.27704	25.4452		14.2756	27.837		7.27667	34.8455		15.276	39.3339		8.27601	32.4477		16.2764	36.7869
1.2785	53.2643		9.27788	68.3817		2.27796	42.0865		10.2781	26.0118		3.27674	51.1379		11.2777	36.2889		4.2768	50.0344		12.2772	33.1038		5.27717	36.8466		13.2773	32.0838		6.27816	34.6993		14.2773	33.9537		7.27841	34.0969		15.2776	40.0049		8.27781	27.0616		16.2775	33.1515
1.27948	50.1537		9.27892	53.8876		2.27977	41.5646		10.2791	32.8682		3.27764	44.7885		11.2794	31.9168		4.27805	41.6094		12.2788	27.1421		5.27884	30.4137		13.2792	29.0329		6.27982	29.1611		14.2786	36.951		7.27966	34.2162		15.2789	46.5362		8.27906	24.6996		16.2791	31.5142
1.2808	59.1454		9.28003	65.3397		2.28109	54.0218		10.28	39.0982		3.27883	36.0831		11.2811	25.7613		4.27902	48.6685		12.28	27.5179		5.28029	30.4883		13.2805	27.1242		6.28135	30.038		14.2796	41.6362		7.28063	30.8491		15.2799	47.7858		8.2799	42.2297		16.2808	30.2527
1.2826	64.2869		9.28156	67.4184		2.28192	55.7515		10.2815	41.0755		3.28063	44.6573		11.282	32.9248		4.28041	49.271		12.281	34.5383		5.28127	38.0753		13.2813	26.0387		6.28239	38.1618		14.2809	33.8881		7.28195	27.336		15.2812	49.8913		8.28115	44.0042		16.2819	25.0694
1.28399	64.114		9.28322	71.6324		2.2831	40.0138		10.2831	41.1829		3.28216	42.5846		11.2829	36.7929		4.28222	52.9511		12.2825	38.1529		5.28245	35.0274		13.2826	35.1914		6.2835	41.9285		14.2826	28.4961		7.28375	32.048		15.2829	44.881		8.28288	36.9212		16.2829	29.7695
1.28496	69.0616		9.28447	67.481		2.2847	41.502		10.2843	38.9909		3.28306	42.0955		11.2845	40.1391		4.28354	47.4637		12.2842	36.1398		5.28411	34.3295		13.2843	30.5449		6.2851	29.1373		14.2841	32.5789		7.28521	36.4261		15.2844	35.6089		8.2842	46.3155		16.2846	31.9973
1.28614	69.175		9.28538	74.7788		2.28623	46.0679		10.2853	32.2479		3.28403	40.9831		11.2861	35.0035		4.28444	47.2072		12.2856	34.1625		5.28571	41.839		13.2857	29.0836		6.28677	24.2015		14.2851	33.8852		7.28612	37.9799		15.2854	36.7929		8.28517	48.7312		16.2862	35.3316
1.28795	59.7359		9.28684	71.2387		2.28727	42.9723		10.2867	38.0306		3.2857	49.1546		11.2872	37.9799		4.28583	49.7601		12.2865	33.0054		5.28682	38.135		13.2866	29.0269		6.28795	24.6101		14.2862	34.9021		7.2873	39.4412		15.2866	35.9221		8.28642	41.7257		16.2873	39.3428
1.28948	58.54		9.28864	67.2484		2.28838	41.666		10.2885	32.6326		3.2873	52.6171		11.2883	44.5499		4.28763	43.3988		12.2878	37.6787		5.28786	35.1079		13.2878	30.0081		6.28892	31.046		14.2879	32.9219		7.28903	33.2648		15.2883	36.2203		8.28816	37.4967		16.2882	38.7732
1.29045	59.214		9.28996	60.2698		2.28998	37.7681		10.2898	35.3375		3.28834	37.9739		11.2897	36.8615		4.28902	37.2343		12.2896	36.8377		5.28939	39.313		13.2896	30.1722		6.29038	40.9055		14.2895	35.9728		7.29063	38.973		15.2899	35.0453		8.28969	36.2382		16.2896	33.5899
1.29156	60.2817		9.29086	58.1523		2.29171	42.686		10.2907	42.7844		3.28938	36.3485		11.2915	30.1334		4.28979	42.1671		12.291	31.6395		5.29113	44.541		13.2912	28.4752		6.29218	38.7911		14.2906	29.4027		7.2916	43.1184		15.291	39.1251		8.29073	39.9691		16.2913	27.8221
1.29336	66.1211		9.29225	58.5191		2.29282	45.2985		10.2921	37.7323		3.29098	52.7185		11.2928	30.4107		4.29097	42.1253		12.2919	41.1083		5.29231	35.4419		13.2922	27.834		6.29336	40.5059		14.2916	30.1244		7.29271	30.5628		15.292	36.4678		8.29177	42.516		16.2925	27.7267
1.29496	64.9997		9.29413	58.3641		2.2938	35.6924		10.2939	38.964		3.29271	57.4753		11.2938	39.2175		4.2927	46.2678		12.2933	40.1301		5.29321	28.2665		13.2932	26.9274		6.29434	44.7915		14.2934	34.1386		7.29445	32.2031		15.2937	38.9581		8.29351	36.778		16.2934	30.6434
1.2958	67.0933		9.29538	54.487		2.29532	44.4426		10.2953	45.0689		3.29389	39.0237		11.2951	42.3192		4.29416	52.6797		12.2951	34.8812		5.29481	30.2706		13.2949	36.3515		6.29586	35.5105		14.295	30.2348		7.29612	38.6151		15.2953	43.0677		8.29517	43.36		16.2948	33.9209
1.29684	53.8667		9.29614	58.0897		2.29706	42.7337		10.2962	32.8622		3.29487	39.2593		11.2969	40.9115		4.29513	44.4724		12.2964	35.8058		5.29661	37.458		13.2966	32.9905		6.29767	32.5938		14.2959	32.385		7.29702	35.0542		15.2963	46.2558		8.29622	41.0248		16.2966	41.2217
1.29843	51.6449		9.29746	64.0752		2.29824	47.0968		10.2975	40.819		3.29633	48.3077		11.2983	29.689		4.29631	40.6312		12.2972	42.7665		5.29773	33.4408		13.2977	34.4786		6.29885	29.0836		14.2968	33.1992		7.29799	35.8684		15.2972	47.7708		8.29726	39.99		16.298	38.2334
1.30003	54.7226		9.29913	59.9656		2.29921	40.6789		10.2993	45.3522		3.29813	52.1101		11.2992	30.3421		4.29798	51.9938		12.2984	49.1815		5.29856	31.0907		13.2987	33.0799		6.29961	29.4594		14.2984	26.6471		7.29959	35.8863		15.2987	46.3155		8.29892	35.7491		16.2989	34.5532
1.30114	59.5808		9.30052	54.83		2.30081	33.9239		10.3007	35.5195		3.29938	47.2967		11.3006	28.8301		4.29958	49.3694		12.3001	41.1173		5.29995	34.9439		13.3003	34.1088		6.30093	30.4883		14.3001	24.5505		7.30119	29.3311		15.3004	43.4286		8.30059	29.2327		16.3003	35.0721
1.30211	60.0401		9.30149	52.6827		2.30255	35.8773		10.3016	35.5731		3.30035	50.3476		11.3024	32.5312		4.30069	50.3923		12.3015	30.53		5.30161	33.1157		13.3021	37.9888		6.3026	34.8514		14.3012	26.6709		7.30223	34.9976		15.3015	42.0358		8.30156	33.2022		16.302	46.1992
1.30364	58.4744		9.30274	60.1027		2.30366	36.5543		10.3027	36.4768		3.30174	49.1725		11.3037	32.9785		4.30166	51.4361		12.3026	27.6849		5.30293	38.5048		13.3031	32.4894		6.30392	29.2118		14.3022	35.3614		7.30327	33.6436		15.3025	37.6339		8.30247	30.9923		16.3035	37.4103
1.30538	65.0892		9.30441	60.6575		2.30449	35.8237		10.3044	37.2701		3.30362	43.6523		11.3045	30.8163		4.30326	51.2035		12.3037	26.6649		5.30384	38.1022		13.3039	30.3481		6.30489	27.3688		14.3036	28.8987		7.3048	37.6876		15.304	43.527		8.30399	33.2082		16.3044	41.6929
1.30663	64.284		9.306	69.8072		2.30588	44.371		10.3059	37.5206		3.30487	43.5956		11.3057	32.9845		4.30499	44.0638		12.3053	24.8487		5.30516	29.2536		13.3055	30.5271		6.30614	34.6397		14.3054	27.7774		7.30653	42.5786		15.3058	43.7507		8.30566	30.8313		16.3057	39.4472
1.30753	58.1911		9.30697	61.1615		2.30755	43.3391		10.3069	34.4667		3.3057	46.7032		11.3074	38.7553		4.30611	43.8073		12.307	30.7418		5.30696	33.7808		13.3071	34.1237		6.30788	31.0132		14.3067	38.7255		7.30778	39.2533		15.3071	45.4804		8.30684	27.5119		16.3074	40.0079
1.30899	51.5942		9.30809	53.2822		2.30887	39.7335		10.308	43.2705		3.30695	43.9833		11.3088	35.1974		4.30708	41.7048		12.3081	37.7771		5.30842	34.3534		13.3083	31.4337		6.30947	34.0999		14.3077	46.1932		7.30869	36.0235		15.308	42.2983		8.30781	37.2343		16.3089	30.1125
1.3108	53.0466		9.30975	54.6272		2.30984	48.6655		10.3096	43.4882		3.30869	38.7523		11.3099	33.1008		4.30867	45.886		12.3092	37.3953		5.30932	40.9175		13.3093	30.8939		6.31045	32.3105		14.309	38.7225		7.31014	38.639		15.3094	46.9865		8.3092	46.739		16.3098	22.8714
1.31211	69.0527		9.31142	57.1502		2.31116	41.0517		10.3113	35.8535		3.31008	30.2079		11.311	31.6931		4.31048	41.7018		12.3107	35.3823		5.3105	44.2249		13.3107	37.9858		6.31156	28.7913		14.3109	32.5043		7.31188	39.3398		15.3112	47.2996		8.31094	41.6094		16.3108	36.6438
1.31302	65.7483		9.31253	63.6815		2.31289	38.3974		10.3124	33.6406		3.31105	40.8369		11.3126	30.2408		4.31152	36.3724		12.3124	33.1694		5.31231	39.4084		13.3125	37.3506		6.31329	32.2807		14.3122	28.4484		7.3132	30.6046		15.3126	51.5644		8.31233	37.3894		16.3125	28.6422
1.31441	53.6132		9.3135	55.8619		2.31442	43.9087		10.3134	34.5621		3.31223	46.2141		11.3143	35.6447		4.31236	43.4495		12.3136	32.564		5.31384	33.059		13.3139	42.1581		6.31489	34.8604		14.3131	26.7634		7.3141	36.3545		15.3135	46.1634		8.31323	41.8032		16.314	31.8184
1.31628	46.0322		9.31517	52.1906		2.31539	45.2388		10.3149	36.3694		3.31389	37.9739		11.3153	37.0554		4.31381	43.2884		12.3146	31.7737		5.31481	26.0923		13.3148	44.7796		6.31593	31.547		14.3144	30.9088		7.31549	39.2921		15.3148	35.0632		8.31448	34.9498		16.315	33.1187
1.31753	53.3687		9.31691	52.0028		2.31657	52.7066		10.3167	35.3465		3.31549	43.4196		11.3164	32.1673		4.31555	39.8558		12.3162	36.6856		5.31599	39.5188		13.3161	37.2194		6.31698	29.7636		14.3162	34.0194		7.3173	36.5096		15.3166	33.6257		8.31629	30.2109		16.3161	35.6835
1.3183	45.8592		9.31788	64.8357		2.31831	42.9723		10.3179	26.1818		3.31653	51.8298		11.318	35.6805		4.31673	39.4919		12.3179	36.6468		5.31773	39.0237		13.3178	37.9113		6.31871	28.2068		14.3176	30.0976		7.31862	36.8108		15.318	33.1455		8.31774	32.3433		16.3177	36.4589
1.31955	49.763		9.31878	71.5221		2.31984	35.9847		10.3189	30.5241		3.31764	49.2322		11.3197	32.2866		4.3177	42.4713		12.319	35.9221		5.31932	31.3204		13.3193	31.9079		6.32031	34.419		14.3184	24.0644		7.31945	39.9154		15.3188	40.1033		8.31865	36.8198		16.3194	27.1093
1.32128	54.3021		9.32024	63.1477		2.32081	46.6793		10.3203	34.1088		3.31924	35.4598		11.3208	29.6294		4.31902	51.0126		12.3199	36.0175		5.32023	40.6461		13.3203	29.9008		6.32128	35.3525		14.3196	27.2554		7.3207	34.926		15.3199	39.6977		8.3199	33.4974		16.3206	31.7677
1.32267	53.8906		9.32191	68.5308		2.32199	55.513		10.3221	37.4997		3.32098	37.0524		11.3218	31.2905		4.32083	43.4375		12.3213	34.2072		5.3212	38.4451		13.3215	38.7225		6.32218	38.1707		14.3213	27.4761		7.32237	27.7475		15.3216	35.0781		8.32177	32.6743		16.3216	28.9494
1.32364	44.5619		9.32308	54.9493		2.32373	37.5176		10.3233	31.3472		3.32202	35.9728		11.3234	32.4626		4.32222	43.1632		12.323	34.6963		5.32279	33.5869		13.3233	40.9055		6.32371	28.5229		14.3227	30.0588		7.32382	28.7078		15.3231	34.1297		8.32323	40.315		16.323	31.1563
1.32482	46.6793		9.32406	59.6286		2.32532	35.4926		10.3241	37.2134		3.32306	40.9801		11.3252	31.6574		4.32319	55.4294		12.3242	31.7051		5.32432	42.4534		13.3248	37.3983		6.32538	24.1956		14.3238	35.7402		7.3248	31.4575		15.3241	39.3339		8.32406	37.279		16.3248	34.1297
1.32656	50.9888		9.32545	62.1427		2.32623	38.1439		10.3255	37.8576		3.32473	49.271		11.3263	29.4862		4.32437	56.7118		12.3252	32.4954		5.32543	48.0064		13.3256	37.2194		6.32649	31.4903		14.3249	34.7858		7.32598	30.3451		15.3252	43.2019		8.32517	31.9526		16.3261	26.5486
1.32816	49.4022		9.32725	52.3368		2.3272	38.8805		10.3271	36.6975		3.32639	38.2781		11.3271	33.0919		4.32617	49.596		12.3265	35.0423		5.32648	39.3756		13.3267	39.1758		6.32753	34.0492		14.3265	24.8099		7.32764	36.2352		15.3269	37.4401		8.32684	37.5176		16.327	32.7519
1.3292	55.9931		9.32864	55.2326		2.3288	42.6621		10.3285	30.873		3.32744	45.5908		11.3285	28.7884		4.3277	42.352		12.3283	34.4339		5.328	43.0498		13.3284	37.0733		6.32899	38.1857		14.3282	32.6027		7.32924	36.2889		15.3285	34.6248		8.3283	34.9111		16.3284	27.7117
1.33024	52.3964		9.32954	51.0484		2.33046	42.6502		10.3294	28.8748		3.32827	49.432		11.3302	37.8009		4.32867	48.8564		12.3298	37.6488		5.32974	39.0147		13.3299	34.929		6.33072	33.0919		14.3293	48.0571		7.33028	35.3972		15.3296	31.9973		8.32934	39.7633		16.3303	34.6963
1.33191	46.56		9.33079	40.8847		2.33157	41.5676		10.3307	35.1795		3.3298	33.2857		11.3315	32.2538		4.32979	46.4109		12.3307	50.0464		5.33099	44.8601		13.3309	28.4543		6.33204	35.7223		14.3303	37.3983		7.33133	37.3059		15.3306	37.7055		8.33045	39.4412		16.3314	44.1086
1.33364	46.7688		9.3326	39.9989		2.33255	47.8215		10.3325	38.1707		3.33146	38.8805		11.3324	33.9597		4.33159	45.7369		12.3319	43.017		5.33189	40.6073		13.332	36.1159		6.33295	40.0228		14.3319	33.6555		7.33299	31.9287		15.3321	30.8849		8.33205	35.2212		16.3323	34.5621
1.33468	47.9319		9.33406	50.9589		2.33407	44.5499		10.334	41.3887		3.33264	49.9718		11.3338	25.5436		4.33319	46.5034		12.3337	36.8287		5.33335	37.0255		13.3336	28.01		6.33427	32.1405		14.3336	35.0214		7.33466	35.1228		15.3339	38.1678		8.33379	45.2418		16.3335	28.8122
1.33573	60.052		9.33496	47.75		2.33588	36.7929		10.335	33.405		3.33362	44.9078		11.3356	27.16		4.33402	53.4283		12.3352	41.9285		5.33509	42.7755		13.3353	28.2575		6.33607	33.9687		14.3347	30.0141		7.33577	33.5422		15.3351	45.3313		8.3349	40.0317		16.3353	34.1237
1.33732	43.7298		9.33621	48.3136		2.33713	45.8681		10.336	41.0338		3.33501	40.7862		11.337	22.7492		4.33499	53.0615		12.3362	31.4396		5.33641	34.1148		13.3364	33.3036		6.33753	48.0571		14.3357	33.0531		7.33674	30.9386		15.336	43.3302		8.33587	38.7553		16.3366	27.1928
1.33906	41.9881		9.33802	41.8957		2.33803	51.3586		10.3378	43.0946		3.33674	37.1776		11.3379	32.2538		4.33666	50.3893		12.3374	29.8948		5.33738	39.2086		13.3374	30.4167		6.33843	49.9002		14.3373	31.9407		7.33841	34.4965		15.3376	40.5208		8.3374	37.9679		16.3376	29.9992
1.3401	48.928		9.33947	49.0145		2.33942	41.9434		10.3394	40.6103		3.33813	47.1446		11.3391	42.9872		4.33819	46.3214		12.3391	30.4346		5.33877	40.154		13.3389	38.0157		6.33968	42.6114		14.339	36.1189		7.34014	37.6727		15.3394	35.773		8.33913	42.5727		16.3388	31.9735
1.341	50.3148		9.34038	50.9082		2.34123	47.2519		10.3405	38.9074		3.3391	50.944		11.3409	33.6078		4.3393	48.1675		12.3406	29.525		5.34057	38.4332		13.3407	40.157		6.34149	33.0501		14.3402	34.0641		7.34119	41.7048		15.3405	42.7456		8.34031	40.8101		16.3405	31.8959
1.34246	52.9153		9.34142	58.3819		2.34255	45.3074		10.3415	34.9797		3.34035	43.2496		11.3424	25.0515		4.34034	47.8036		12.3415	36.0235		5.34189	33.4199		13.3419	36.8913		6.34295	30.4316		14.341	37.1568		7.34202	30.7806		15.3413	41.9523		8.34128	39.1132		16.3421	35.6507
1.34413	51.29		9.34309	46.4348		2.34345	39.5307		10.3432	38.7225		3.34209	42.7635		11.3434	34.592		4.34187	50.2134		12.3426	37.5683		5.34273	32.2687		13.3428	31.881		6.34371	37.7592		14.3424	31.2398		7.34348	27.3061		15.3428	40.2047		8.34274	37.4878		16.3431	34.1536
1.34531	50.6756		9.34461	51.5405		2.34484	39.4949		10.3448	40.1063		3.34362	52.6052		11.3446	30.4853		4.34361	48.9966		12.3442	47.1028		5.34391	27.6014		13.3443	32.4298		6.34482	36.8705		14.3441	24.1628		7.34514	30.026		15.3444	33.3841		8.34455	37.1568		16.3442	40.1093
1.34628	59.1067		9.34565	54.7554		2.34664	42.9514		10.3458	39.9572		3.34452	53.7504		11.3463	28.6154		4.34486	55.8798		12.3458	43.4495		5.34557	39.5605		13.3462	34.2371		6.34656	31.1086		14.3454	37.8397		7.34632	39.2533		15.3457	42.0627		8.34573	36.3307		16.3459	47.1953
1.34767	51.5316		9.3467	52.8796		2.34803	48.8445		10.3468	38.0336		3.34577	50.2611		11.3479	37.8964		4.34576	54.1411		12.3468	37.8218		5.34703	41.5408		13.3473	43.1781		6.34802	32.4178		14.3463	34.7202		7.3473	38.6748		15.3467	40.5596		8.34656	40.7177		16.3475	38.2781
1.34948	49.3843		9.34829	47.4517		2.3488	46.2976		10.3483	41.5438		3.34758	43.0051		11.3488	31.4993		4.34722	50.616		12.3478	34.7172		5.348	36.6468		13.3481	33.235		6.34906	29.5518		14.3477	38.1886		7.34869	34.8276		15.348	45.0032		8.34788	42.2834		16.3486	36.6915
1.35086	59.0947		9.35003	46.569		2.34998	39.1937		10.3499	39.3846		3.34903	42.4056		11.3498	34.9021		4.34902	43.5389		12.3494	40.5954		5.34918	35.2839		13.3494	28.3679		6.35017	39.304		14.3495	39.3368		7.35049	31.6365		15.3497	45.1106		8.34955	40.831		16.3496	35.2749
1.35177	58.1791		9.35121	56.5597		2.35164	44.3978		10.3511	32.4626		3.34987	43.9415		11.3514	35.3286		4.35034	51.2274		12.3512	42.2804		5.35085	34.4906		13.3512	31.0579		6.35177	36.9361		14.3509	34.0999		7.35188	34.5025		15.3512	34.3474		8.35087	40.7654		16.3513	36.7273
1.35302	52.9571		9.35218	50.6726		2.3531	37.1329		10.3521	24.8845		3.35098	46.223		11.353	33.9388		4.35124	45.3194		12.3524	34.6725		5.35245	35.2451		13.3525	30.3571		6.3535	35.4151		14.3518	34.3862		7.35278	34.7262		15.3521	31.2428		8.35184	33.9806		16.353	43.9594
1.35482	53.9472		9.35364	39.3488		2.35407	33.3871		10.3535	34.5234		3.35258	44.0161		11.3541	38.8865		4.35263	46.7181		12.3533	28.7615		5.35349	31.6812		13.3535	32.5699		6.35461	38.3139		14.353	37.3357		7.35403	29.4773		15.3532	43.0409		8.35316	37.5325		16.3539	39.3339
1.35635	54.4691		9.35538	37.4132		2.35525	38.7344		10.3553	36.271		3.3541	44.9138		11.3551	40.3329		4.35444	50.5474		12.3547	31.6693		5.35453	32.2657		13.3547	34.5472		6.35552	33.1068		14.3547	30.7537		7.35577	33.3424		15.3551	43.4345		8.3549	46.4288		16.3548	34.4965
1.35725	57.6751		9.35663	42.2476		2.35692	44.2756		10.3566	35.5433		3.35521	42.8947		11.3566	33.5631		4.35576	48.4061		12.3565	35.4717		5.35613	33.3632		13.3564	36.9569		6.35711	32.2896		14.3563	35.0035		7.3573	42.1074		15.3567	33.235		8.35635	42.0179		16.3564	40.5894
1.35843	58.4953		9.35753	46.0709		2.35859	39.316		10.3575	32.8503		3.35626	37.279		11.3584	25.8538		4.35652	46.7211		12.3578	38.9909		5.35786	36.098		13.358	36.1249		6.35885	34.8693		14.3573	36.3635		7.3582	34.3802		15.3576	34.5383		8.35733	38.2632		16.358	39.8796
1.36031	57.2009		9.35899	50.1478		2.35963	34.2818		10.3588	34.4786		3.35785	42.4027		11.3597	28.1293		4.35777	47.2758		12.3587	36.4708		5.35904	39.984		13.3589	27.3807		6.36003	40.3001		14.3584	36.9062		7.35945	25.7524		15.3587	37.5057		8.35851	41.7704		16.3591	39.313
1.36177	54.147		9.36079	55.5189		2.36067	46.7091		10.3606	33.2559		3.35959	47.7619		11.3606	36.9868		4.35951	46.062		12.3601	32.6266		5.35995	39.9005		13.3601	30.4495		6.36093	38.4183		14.3602	45.543		7.36126	30.366		15.3605	40.4582		8.36024	38.4272		16.3601	36.0831
1.3626	52.0117		9.36204	55.3161		2.36234	44.7766		10.3621	33.8583		3.36077	53.7206		11.3619	32.3701		4.36097	51.4093		12.362	40.3329		5.36155	32.4149		13.3619	33.7152		6.36253	36.614		14.3618	40.8757		7.36271	33.7122		15.3621	37.5385		8.36184	40.1838		16.3616	37.2194
1.36364	54.997		9.36288	52.1578		2.36401	35.1526		10.363	33.1247		3.36167	46.4855		11.3638	28.7824		4.36194	47.7619		12.3633	39.6112		5.36335	35.7044		13.3635	30.4435		6.36427	40.7683		14.3627	33.3245		7.36355	35.2689		15.363	31.216		8.36281	42.1492		16.3633	36.608
1.36531	43.181		9.36413	48.5641		2.36512	42.6144		10.3643	38.3944		3.3632	39.2384		11.3651	35.761		4.36312	50.3297		12.364	32.3164		5.36439	37.0733		13.3645	33.8434		6.36545	36.5931		14.3636	33.0262		7.36459	39.8587		15.3639	33.2171		8.36392	33.4885		16.3647	37.5057
1.36684	49.5364		9.36579	47.574		2.36609	52.808		10.3661	40.3508		3.36501	40.0794		11.366	39.65		4.36479	46.9567		12.3653	34.5174		5.36523	31.2219		13.3655	37.7323		6.36621	30.4614		14.3653	39.1042		7.36625	38.0693		15.3655	34.0641		8.36559	40.7922		16.3656	44.2726
1.36788	53.7713		9.36718	53.6788		2.36769	48.8504		10.3675	39.8975		3.36619	43.2407		11.3674	35.6865		4.36638	51.3466		12.367	35.3107		5.36668	38.4034		13.3673	33.8523		6.3676	36.0056		14.3668	28.4663		7.36778	34.8067		15.3671	39.6798		8.36726	38.2095		16.3669	41.2366
1.36892	53.1152		9.36816	58.3193		2.36949	43.9087		10.3683	33.0501		3.36716	42.0657		11.3692	33.6138		4.36742	50.8814		12.3684	37.4639		5.36835	33.9388		13.3689	40.4105		6.36927	36.0205		14.3679	29.6413		7.36882	43.1095		15.3683	37.1478		8.36823	42.2685		16.3687	40.0466
1.37052	50.3565		9.3694	51.1588		2.37053	42.4355		10.3694	42.7009		3.36869	33.9746		11.3706	29.7099		4.36847	49.5185		12.3694	36.7869		5.3696	29.8053		13.3699	35.4986		6.37059	35.5254		14.369	30.5151		7.36987	47.8514		15.3692	38.809		8.36913	40.7982		16.3701	37.6846
1.37225	55.5786		9.37107	46.396		2.37137	46.5958		10.3712	33.2589		3.37049	41.3111		11.3713	38.9879		4.37006	49.6557		12.3706	27.7058		5.37057	36.9212		13.3708	29.0717		6.37156	45.7011		14.3705	30.1125		7.37139	35.6745		15.3707	48.931		8.37066	49.5573		16.371	32.7966
1.37343	54.4065		9.37267	52.0833		2.37282	52.0087		10.3726	33.7211		3.37174	48.3136		11.3726	34.1715		4.3718	48.412		12.3723	26.0625		5.37196	41.6213		13.3723	30.882		6.37288	45.6325		14.3722	32.397		7.3732	29.0001		15.3725	53.1092		8.37226	46.5988		16.3723	39.2354
1.37441	56.1512		9.37364	48.6208		2.37449	43.0737		10.3736	37.0404		3.37251	47.9528		11.3742	36.0682		4.37291	46.3721		12.3739	37.6041		5.3737	36.2859		13.374	40.1391		6.37461	34.1685		14.3735	39.146		7.37438	38.6062		15.3737	42.6025		8.37344	45.2359		16.3741	42.6204
1.37586	50.4669		9.37475	53.8578		2.37574	39.3935		10.3747	37.0106		3.37383	42.2297		11.3756	37.798		4.37388	43.1005		12.3749	35.6477		5.37509	36.7392		13.3752	41.1054		6.37614	36.5185		14.3744	49.5006		7.37528	35.3107		15.3747	38.2364		8.37441	41.0457		16.3756	40.4791
1.37767	46.9		9.37642	51.8119		2.37671	41.5139		10.3764	35.4896		3.37549	48.7431		11.3766	38.3258		4.37548	47.6277		12.376	36.7273		5.37606	32.9219		13.3762	34.1178		6.37704	30.8641		14.3759	43.4823		7.37674	30.1334		15.3761	41.5736		8.37587	39.0833		16.3764	37.3745
1.37892	52.3666		9.37809	44.7885		2.3781	44.377		10.378	40.0466		3.37688	45.0003		11.3778	37.3357		4.37722	50.3237		12.3776	35.8773		5.37731	34.0015		13.3776	39.7514		6.37822	39.6351		14.3776	38.1707		7.37855	29.2715		15.3779	33.408		8.37767	36.7631		16.3775	47.3891
1.37982	54.4393		9.37913	43.6254		2.37984	45.6355		10.3791	26.823		3.37785	39.2533		11.3795	33.5064		4.37826	43.6105		12.3793	39.808		5.37904	33.0919		13.3794	35.5463		6.37996	42.1074		14.3789	40.8608		7.37987	35.8475		15.3792	33.7629		8.37892	36.3605		16.3791	45.5311
1.38128	46.6555		9.38017	53.0168		2.38123	54.0904		10.3801	32.0808		3.3791	44.9704		11.3811	34.7948		4.37916	36.784		12.3804	38.8418		5.38057	35.5344		13.3807	33.8911		6.38156	39.5367		14.3798	35.0333		7.38077	40.0228		15.3801	39.3995		8.37983	29.686		16.3807	38.1051
1.38316	47.9856		9.38184	50.4639		2.3822	36.6319		10.3817	28.1651		3.38084	42.7069		11.3822	32.1703		4.38062	42.182		12.3814	40.3061		5.38154	34.6755		13.3816	37.5385		6.38253	32.904		14.3813	31.0818		7.38216	37.3894		15.3815	44.8929		8.38122	36.8973		16.3816	36.6766
1.38441	51.0365		9.38357	53.4909		2.38345	34.7739		10.3835	37.625		3.38244	37.2313		11.3832	36.5364		4.38229	45.3999		12.3831	41.7436		5.38273	34.0343		13.383	37.2761		6.38364	30.375		14.3831	36.9569		7.38396	37.4699		15.3833	36.3038		8.38302	44.1056		16.3828	37.8516
1.3851	55.2744		9.38454	49.9151		2.38519	46.053		10.3846	34.7262		3.38341	43.5538		11.3849	27.6163		4.38347	39.984		12.3848	38.8209		5.38453	34.8932		13.3848	46.8195		6.38538	35.2511		14.3844	34.8783		7.38521	42.5428		15.3847	36.5901		8.38441	43.9475		16.3843	36.447
1.38642	58.7726		9.38545	50.0553		2.38671	48.0452		10.3855	31.1623		3.38452	40.148		11.3866	25.6599		4.38444	48.6715		12.3858	41.5945		5.38606	34.592		13.3862	33.6615		6.38697	34.1118		14.3852	29.3938		7.38605	36.0056		15.3855	44.8333		8.38531	41.4334		16.3861	42.8023
1.38816	53.3239		9.38697	52.1161		2.38769	47.5114		10.3871	40.2017		3.38626	42.009		11.3877	32.221		4.3859	42.5488		12.3867	33.3334		5.38689	43.6612		13.3871	33.4706		6.38788	34.6814		14.3865	29.2417		7.3873	30.2318		15.3867	48.3434		8.38656	45.2627		16.3872	38.8716
1.38948	47.4607		9.38864	47.7291		2.3888	49.3008		10.3889	44.535		3.38785	39.0505		11.3887	33.074		4.38763	46.4855		12.3881	35.6805		5.38793	40.327		13.3884	31.4128		6.38885	35.8982		14.3881	35.3375		7.38903	30.0648		15.3884	40.9294		8.38837	43.4077		16.3882	32.6982
1.39038	40.6848		9.38975	47.5502		2.3906	53.5894		10.39	34.24		3.38889	30.5897		11.3903	35.6447		4.38902	44.6305		12.3898	32.6266		5.3896	53.9264		13.3902	32.2419		6.39045	34.1357		14.3896	29.012		7.39042	37.7711		15.3898	31.3651		8.38983	46.4139		16.3897	29.7099
1.39163	41.8539		9.39073	49.7511		2.3922	40.825		10.3908	28.7138		3.39001	48.3345		11.392	34.589		4.38992	49.1099		12.391	29.7278		5.39113	41.7764		13.3916	28.1233		6.39204	26.6172		14.3906	33.0173		7.39139	40.2882		15.3908	43.9147		8.39066	43.6821		16.3915	36.6587
1.39336	48.7968		9.39218	48.2928		2.39303	33.0978		10.3923	27.3539		3.39167	49.3873		11.3931	36.6617		4.39124	46.2916		12.392	26.832		5.39217	35.7491		13.3925	28.0875		6.39316	21.9767		14.3918	31.0698		7.39257	36.8436		15.392	42.012		8.39177	41.8241		16.3927	33.7301
1.39496	47.7142		9.39399	46.9567		2.39407	31.2458		10.3939	31.8244		3.39334	55.5756		11.394	34.3236		4.39298	42.7098		12.3933	30.5509		5.39321	41.2873		13.3936	36.7362		6.39413	37.7652		14.3934	33.3722		7.39431	39.3816		15.3937	42.6591		8.39344	42.7725		16.3936	33.7211
1.39593	51.7403		9.39524	49.5334		2.39574	40.2852		10.3952	30.5927		3.39431	52.0505		11.3954	43.4077		4.39451	37.2313		12.3951	35.2779		5.39481	34.6397		13.3953	43.1989		6.39566	37.3924		14.3951	31.7737		7.39591	33.5064		15.3953	39.2146		8.39497	34.8186		16.3951	39.2175
1.39705	51.8447		9.39621	46.3423		2.39727	39.1818		10.3962	27.7088		3.39521	45.3611		11.397	34.5025		4.39541	42.3162		12.3965	36.104		5.39648	35.3256		13.3968	35.0184		6.39739	28.1144		14.3961	40.7803		7.39688	32.2389		15.3964	35.1049		8.39601	41.1918		16.3969	39.6142
1.39878	57.1532		9.39753	35.6596		2.39831	39.1698		10.3975	32.215		3.39674	49.7213		11.3982	35.5224		4.39659	46.8284		12.3975	37.2969		5.39773	47.4995		13.3978	33.8494		6.39864	34.6218		14.3972	43.9505		7.39799	37.1359		15.3973	40.0258		8.39712	48.424		16.3981	38.7762
1.40045	53.2852		9.39934	48.6506		2.39942	37.455		10.3992	34.4309		3.39834	47.1684		11.3992	35.1407		4.3984	46.0083		12.3987	32.5819		5.39863	36.8913		13.3989	40.4254		6.39961	36.9212		14.3988	35.5344		7.39966	37.2194		15.3989	39.3905		8.39872	46.9328		16.3989	34.1476
1.40149	57.7527		9.40072	51.4391		2.40095	43.4793		10.4007	40.8131		3.39952	36.7452		11.4006	41.2604		4.39999	41.5795		12.4005	34.0939		5.40009	41.2187		13.4005	37.1597		6.401	30.3511		14.4005	39.9333		7.40132	36.602		15.4007	38.0187		8.40038	37.0285		16.4003	40.157
1.40246	63.7471		9.40163	48.4657		2.40262	47.2102		10.4016	40.1778		3.40049	39.2056		11.4024	44.7527		4.40083	44.4784		12.402	31.2458		5.40189	41.0218		13.4022	33.5631		6.40281	32.3135		14.4016	44.4784		7.40237	41.2187		15.4019	37.4699		8.40149	39.134		16.4019	38.3616
1.4042	50.6548		9.40288	37.7204		2.40387	42.8769		10.4028	34.3236		3.40195	46.9775		11.4038	29.3818		4.40187	42.3162		12.403	29.1731		5.40321	36.0324		13.4033	42.1283		6.40413	40.5536		14.4026	40.7296		7.40341	33.1724		15.4028	41.6153		8.40254	39.7335		16.4032	26.6351
1.40586	48.7222		9.40475	36.7929		2.40484	39.4174		10.4046	31.7349		3.40376	44.547		11.4047	30.4197		4.40354	49.089		12.4042	36.9659		5.40411	33.4408		13.4044	45.3641		6.40503	34.3564		14.4043	38.8865		7.40508	29.3162		15.4044	37.2283		8.40406	45.2776		16.4042	36.3545
1.40684	60.064		9.40621	36.271		2.4063	42.3907		10.4062	32.8413		3.40508	45.8264		11.406	28.9255		4.40506	44.6424		12.406	38.46		5.40557	34.9588		13.4059	35.4389		6.40642	33.3364		14.406	40.7982		7.40674	31.1414		15.4062	38.8179		8.4058	46.5362		16.4055	41.5945
1.40774	51.3705		9.40697	45.2717		2.40803	46.8553		10.4071	31.8333		3.40598	46.2827		11.4077	33.4617		4.40611	44.9168		12.4075	40.0287		5.40738	37.7413		13.4076	35.7342		6.40823	37.1717		14.407	38.0216		7.40778	41.8778		15.4072	30.6881		8.40698	39.0416		16.4072	41.5497
1.40927	51.8179		9.40809	45.8025		2.40935	43.8461		10.4082	24.7205		3.4073	42.6383		11.4092	36.5782		4.40722	38.7105		12.4083	40.7355		5.40863	39.9154		13.4088	29.2983		6.40961	44.6603		14.4079	40.8727		7.40862	47.0133		15.408	32.9517		8.40788	35.5731		16.4087	37.2641
1.41086	49.1815		9.40982	43.5926		2.41025	46.3751		10.41	42.34		3.4091	38.3079		11.4102	35.6149		4.40881	44.8303		12.4094	32.0272		5.40946	37.4729		13.4097	33.3185		6.41038	47.5949		14.4094	34.7262		7.41007	33.9478		15.4095	33.8374		8.40948	27.3479		16.4097	39.6381
1.41205	51.4182		9.41128	53.0346		2.41171	39.1489		10.4116	42.8381		3.41049	37.4967		11.4114	34.1774		4.41048	53.3508		12.411	37.9471		5.41071	35.7909		13.4113	37.8576		6.41156	34.9111		14.4111	37.2641		7.41174	35.5731		15.4112	30.5181		8.41122	37.3983		16.4109	39.14
1.41309	57.8928		9.41232	50.0285		2.41352	43.3988		10.4125	33.5481		3.41146	36.8377		11.4132	35.3018		4.41166	36.602		12.4126	35.4151		5.41238	37.2611		13.413	32.4984		6.41322	29.7606		14.4122	38.7672		7.41292	39.6559		15.4124	34.3623		8.4124	39.3428		16.4126	33.915
1.41455	57.1771		9.41343	50.0792		2.41477	44.4038		10.4135	40.2017		3.41271	44.1235		11.4147	37.6131		4.41263	36.6587		12.4136	34.7053		5.41384	39.2533		13.4142	38.0813		6.41468	36.6348		14.4132	35.4121		7.41389	39.1161		15.4134	30.0081		8.41323	41.3082		16.4142	30.3421
1.41628	59.9298		9.41503	55.9126		2.4156	46.7777		10.4151	30.9028		3.41452	43.6523		11.4156	36.268		4.41409	40.5268		12.4147	34.6546		5.41481	35.1705		13.415	34.9379		6.41566	29.8829		14.4146	28.0368		7.41535	25.7911		15.4148	27.2704		8.41462	40.3061		16.4152	40.3956
1.4176	51.4212		9.4167	39.5575		2.41685	38.636		10.4167	33.5631		3.41598	44.2368		11.4166	27.8579		4.4159	50.1328		12.4162	36.4589		5.41599	35.5165		13.4164	37.3536		6.41684	26.7842		14.4164	34.2579		7.41709	25.469		15.4165	34.2937		8.41628	40.5656		16.4163	36.6229
1.4185	59.888		9.41788	45.5759		2.41852	36.2978		10.4178	34.413		3.41681	46.0083		11.4183	36.4589		4.41715	54.3677		12.418	41.4155		5.41766	30.6493		13.4181	41.1531		6.4185	37.8457		14.4178	40.8131		7.41848	34.0402		15.418	34.8037		8.41753	43.4316		16.418	36.5275
1.41982	55.3131		9.41885	64.6001		2.41991	39.3339		10.4188	44.9704		3.41792	45.5788		11.4198	37.4132		4.41805	51.0096		12.4192	35.9966		5.41925	38.3795		13.4194	39.3875		6.42017	36.4589		14.4188	39.8408		7.41938	32.6743		15.4189	32.2061		8.41858	35.087		16.4196	34.3772
1.42163	49.8286		9.42038	57.3262		2.42088	45.7458		10.4203	50.1448		3.41959	42.3341		11.4208	29.3639		4.41958	47.1684		12.4201	27.5924		5.42029	39.6052		13.4204	35.4717		6.42121	39.9482		14.4199	30.4107		7.4207	31.2756		15.4201	32.215		8.41983	40.8578		16.4206	31.1623
1.42302	48.1317		9.42211	51.8686		2.42213	54.836		10.4221	36.1279		3.42112	41.6839		11.4219	33.6406		4.42138	46.6763		12.4216	25.7732		5.42134	34.6874		13.4216	39.3637		6.42225	36.0473		14.4218	30.4853		7.42244	29.4504		15.4219	36.0861		8.42156	37.3387		16.4215	34.7232
1.42399	45.4059		9.42329	50.1985		2.4238	40.4284		10.4233	26.8469		3.42209	39.1281		11.4235	44.6633		4.42263	51.4242		12.4233	36.4589		5.423	30.3302		13.4234	38.4809		6.42378	31.4575		14.4233	37.5117		7.42396	27.0646		15.4234	38.135		8.42302	39.5068		16.4231	28.5796
1.42524	48.7013		9.42427	43.2347		2.42539	37.8487		10.4242	33.9508		3.4232	43.7358		11.4251	44.7915		4.4234	51.117		12.4247	37.1866		5.42467	27.0467		13.4249	40.1778		6.42552	27.3897		14.4242	34.5979		7.42487	26.65		15.4244	27.3181		8.42406	43.4435		16.4247	32.9547
1.42705	54.5377		9.42572	42.2357		2.42644	42.4116		10.4257	39.1191		3.4248	54.2991		11.4264	26.7992		4.42472	50.3028		12.4256	39.2354		5.42578	41.1083		13.4259	42.4474		6.4267	27.3777		14.4254	30.9863		7.42612	30.8372		15.4255	34.3474		8.42524	51.4003		16.4258	38.8507
1.4285	53.6132		9.42753	40.6312		2.42748	47.5382		10.4275	44.0101		3.42653	46.4109		11.4273	27.3777		4.42645	43.0349		12.427	31.0788		5.42675	36.28		13.4271	35.8863		6.42767	34.5323		14.4272	39.1996		7.42792	36.3038		15.4273	31.5709		8.42691	38.6956		16.4268	39.8319
1.42934	51.3735		9.42871	42.686		2.42914	58.373		10.4288	33.8702		3.42764	45.4238		11.4288	28.7585		4.42784	46.1783		12.4288	30.1065		5.42842	36.0622		13.4288	42.7128		6.42927	39.6052		14.4288	42.522		7.42938	43.1035		15.4289	25.8448		8.42851	38.7702		16.4283	42.5488
1.43045	49.4022		9.42947	35.5016		2.43088	53.6758		10.4297	21.6964		3.42862	39.9422		11.4306	33.3573		4.42881	48.6357		12.4301	35.0035		5.43016	37.3983		13.4304	40.5178		6.431	30.9983		14.4296	34.75		7.43021	41.0189		15.4297	34.3474		8.42948	40.5059		16.43	42.4116
1.43211	45.6802		9.43086	39.3726		2.43192	45.039		10.431	32.7071		3.43014	34.9349		11.4319	30.2885		4.42999	40.828		12.4309	37.3446		5.43113	37.3238		13.4314	35.1168		6.43211	34.8783		14.4306	30.1155		7.43132	39.477		15.4308	42.2148		8.43059	41.0218		16.4314	39.0297
1.43364	51.7194		9.4326	45.3373		2.43296	49.9807		10.4329	39.3875		3.43195	40.2852		11.4328	37.121		4.43173	45.8801		12.4322	33.5481		5.43203	38.5077		13.4325	44.1712		6.43295	42.1969		14.4322	37.622		7.43292	31.4456		15.4324	33.6615		8.43233	47.3354		16.4323	33.9239
1.43461	51.8029		9.43385	45.1225		2.43463	43.3928		10.4342	32.8264		3.43313	47.4726		11.4342	35.427		4.43333	54.6719		12.4339	32.4089		5.43349	32.2389		13.4342	41.8271		6.43441	43.9714		14.4338	41.5706		7.43445	37.9978		15.4339	38.9551		8.43399	46.5511		16.4336	28.4633
1.43573	50.5563		9.43482	45.719		2.4363	46.0172		10.435	29.8113		3.4341	47.9856		11.436	34.2729		4.4343	50.5235		12.4352	33.1396		5.43515	31.6782		13.4359	33.2887		6.43607	32.5938		14.4349	36.5245		7.43549	36.5096		15.435	35.9191		8.4349	47.243		16.4354	31.9407
1.43732	40.5059		9.43614	43.0916		2.43727	46.8016		10.4362	30.7209		3.43563	37.2432		11.4373	35.4896		4.43541	41.8778		12.4362	38.5734		5.43634	36.4022		13.4368	32.6177		6.43732	33.3841		14.4359	38.1767		7.4366	35.6924		15.436	32.6505		8.43587	47.9468		16.4368	37.962
1.43906	45.5669		9.43788	47.3235		2.43817	42.17		10.4379	35.6417		3.43744	36.942		11.4381	36.951		4.43715	43.0468		12.4374	38.8805		5.43731	34.5353		13.4378	35.6805		6.43829	43.026		14.4374	44.5112		7.4382	33.4766		15.4376	29.6264		8.43747	41.7078		16.4378	27.16
1.44017	49.2799		9.4394	35.9966		2.4397	33.6078		10.4393	41.3827		3.43862	34.8962		11.4393	32.388		4.43874	43.867		12.4391	42.5637		5.43877	39.471		13.4394	30.1811		6.43961	32.6177		14.4392	43.2765		7.43987	28.5259		15.4394	29.0866		8.43899	39.483		16.4391	38.642
1.44114	42.9812		9.44038	44.2726		2.44137	37.9501		10.4403	36.5036		3.43938	47.7559		11.441	34.5323		4.43979	46.4437		12.4407	32.1256		5.4405	37.9918		13.441	28.3738		6.44135	32.1315		14.4404	36.1279		7.44105	32.4477		15.4405	33.402		8.4401	42.3937		16.4409	40.5268
1.44267	48.0452		9.44149	40.7266		2.44255	40.4015		10.4414	34.8335		3.44077	46.7032		11.4424	38.2334		4.44083	48.9727		12.4417	33.9895		5.44189	33.1694		13.4421	37.5474		6.44281	33.402		14.4413	37.7204		7.44202	29.4564		15.4414	36.6826		8.44108	47.6605		16.4423	38.8567
1.44448	50.4162		9.44322	39.0147		2.44345	40.1629		10.4432	36.4887		3.44244	43.1989		11.4434	37.5624		4.44249	44.3919		12.4428	33.8106		5.44286	39.2533		13.443	40.3478		6.44378	35.436		14.4428	38.5674		7.44348	35.2332		15.4429	27.16		8.44261	46.5839		16.4431	35.7759
1.44566	55.9663		9.44482	42.2297		2.44491	56.9922		10.4448	36.441		3.44376	39.2742		11.4446	34.1774		4.44423	46.6197		12.4445	30.7448		5.44411	35.8594		13.4446	36.5036		6.44496	34.759		14.4445	43.1125		7.44528	38.469		15.4447	29.2238		8.44441	35.1765		16.4442	32.057
1.44663	52.2771		9.44579	49.2322		2.44671	45.3581		10.4458	35.761		3.44473	40.9085		11.4463	26.3369		4.4452	56.3212		12.4462	28.6213		5.44585	34.5204		13.4464	25.9462		6.4467	33.3901		14.4459	43.0349		7.44646	36.11		15.446	35.3644		8.44566	43.0647		16.4459	32.9726
1.44809	48.6298		9.44691	36.0503		2.4481	46.0888		10.4469	26.5755		3.44605	38.806		11.4478	34.5413		4.44604	48.8504		12.4473	27.2316		5.44738	38.6628		13.4477	29.2924		6.44829	31.037		14.4468	45.725		7.44737	38.3676		15.4469	38.5346		8.44656	44.028		16.4473	39.5575
1.44989	42.6114		9.44864	47.1475		2.449	46.73		10.4485	30.867		3.44778	35.3882		11.4489	32.2538		4.44756	45.889		12.4483	25.8388		5.44828	38.639		13.4485	33.1903		6.44927	34.1923		14.4482	52.966		7.44889	36.447		15.4483	31.4158		8.44802	32.7727		16.4484	42.3192
1.45114	53.0525		9.45031	48.3703		2.45025	46.062		10.4503	28.3052		3.44931	43.7417		11.45	25.9283		4.44923	50.0195		12.4499	30.6911		5.44953	29.3013		13.4499	30.9148		6.45038	25.8925		14.45	41.8688		7.4507	40.0407		15.4501	36.8824		8.44976	40.9473		16.4495	37.446
1.45191	55.7963		9.45121	43.6284		2.45206	35.8296		10.4514	32.5073		3.45028	41.6601		11.4517	38.7762		4.45041	47.2758		12.4517	37.3178		5.45134	32.9905		13.4517	36.3992		6.45218	24.9531		14.4513	38.5913		7.45188	44.7975		15.4514	39.647		8.45108	48.3703		16.4512	36.9212
1.45323	46.8135		9.45211	46.0232		2.45359	43.4345		10.4523	34.4727		3.45139	28.6959		11.4533	40.3121		4.45138	46.6733		12.4526	37.8695		5.45286	37.8129		13.4531	46.9984		6.45371	27.503		14.4521	40.3717		7.45271	41.7108		15.4523	38.3706		8.45198	48.594		16.4528	40.5149
1.45489	55.4563		9.45371	39.8647		2.45449	48.412		10.4539	29.8053		3.45313	36.1756		11.4544	33.7092		4.45284	43.0856		12.4535	36.942		5.4537	35.6388		13.454	45.4059		6.45461	33.4587		14.4534	43.5896		7.45403	44.4605		15.4535	34.589		8.45337	47.0968		16.4539	35.8654
1.45621	51.114		9.45538	35.7282		2.45574	47.4905		10.4557	28.4156		3.45473	47.7798		11.4554	31.6156		4.45458	48.0005		12.4551	32.1524		5.45474	34.6993		13.4553	37.2761		6.45559	30.4853		14.455	45.2627		7.4557	37.3357		15.4552	43.3958		8.45524	49.7571		16.4549	36.9241
1.45718	48.9697		9.45649	37.2253		2.45755	41.0815		10.4567	32.6564		3.45577	45.9427		11.4571	28.1561		4.4559	52.7811		12.4567	29.2894		5.45641	33.8315		13.4571	34.249		6.45718	35.3316		14.4564	46.2021		7.45702	42.9991		15.4567	38.9611		8.45656	44.2785		16.4564	41.0815
1.45843	55.3877		9.45746	39.5695		2.45901	43.0111		10.4575	36.5036		3.45681	43.1005		11.4588	28.168		4.45687	57.3292		12.4578	34.3295		5.45793	31.6424		13.4585	35.6059		6.45878	28.3052		14.4574	45.6176		7.45799	39.8915		15.4576	33.0799		8.45733	43.017		16.4582	43.2019
1.46017	45.8681		9.45892	35.9758		2.45984	38.1916		10.459	36.8824		3.45855	35.0721		11.4598	32.0719		4.45819	57.9078		12.4588	27.7356		5.45897	32.8503		13.4593	33.3066		6.45982	29.1283		14.4586	36.9927		7.45924	33.1038		15.4588	34.7948		8.45858	48.0929		16.4593	40.0794
1.4617	51.5852		9.46066	44.6454		2.46088	47.5591		10.4607	38.8597		3.46021	37.2045		11.4606	38.2423		4.45999	56.008		12.4603	29.5101		5.46002	37.1776		13.4605	29.4415		6.46086	30.0708		14.4604	37.0673		7.46098	29.525		15.4605	32.9815		8.46024	47.911		16.4603	31.6603
1.46267	54.6868		9.46197	44.6155		2.46255	58.1732		10.4619	36.7661		3.46112	37.8725		11.4622	35.0721		4.46138	45.6832		12.4621	31.5082		5.46161	36.948		13.4621	33.1187		6.46239	31.1593		14.462	46.5719		7.46257	40.8131		15.4621	29.7934		8.4617	53.312		16.4619	35.7819
1.46378	47.2609		9.46288	38.4749		2.46407	41.8122		10.4629	36.1964		3.46202	39.6798		11.4638	30.8939		4.46229	45.4506		12.4634	31.1563		5.46335	32.5998		13.4636	27.4582		6.46413	38.3497		14.4629	42.7933		7.46355	33.8583		15.4631	29.7188		8.46267	53.7116		16.4637	34.7918
1.46552	46.5988		9.46427	39.9333		2.46512	43.4763		10.4643	40.2733		3.46362	31.717		11.465	35.9459		4.46354	42.2028		12.4643	36.9927		5.46446	32.6027		13.4646	29.8829		6.46538	40.9085		14.464	41.7853		7.46459	32.725		15.4642	29.5727		8.46378	51.1438		16.4648	27.6014
1.46711	57.7378		9.466	36.5603		2.46616	46.6107		10.466	32.1107		3.46528	31.5082		11.466	31.0549		4.46534	41.9434		12.4656	34.5741		5.46543	36.778		13.4657	33.7659		6.46628	37.446		14.4657	46.0172		7.46632	41.4722		15.4658	28.3172		8.46552	46.2379		16.4657	36.268
1.46816	64.4152		9.46739	35.934		2.46776	39.823		10.4674	32.3463		3.46639	41.6213		11.4674	34.3772		4.4668	51.0395		12.4674	29.4266		5.46696	35.6		13.4675	34.6993		6.46774	27.7416		14.4674	36.6826		7.46799	37.5922		15.4675	27.8072		8.46719	46.053		16.4671	38.0544
1.46927	54.499		9.46829	36.5156		2.46949	42.0269		10.4684	32.3343		3.46737	41.3082		11.4691	29.2715		4.46763	46.6435		12.4689	39.9929		5.4687	40.9026		13.4691	40.2435		6.46954	28.0487		14.4684	41.0487		7.46896	39.5307		15.4686	37.0613		8.46823	36.5543		16.4687	39.0744
1.47093	53.4402		9.46961	46.6972		2.47067	45.3611		10.4696	35.5254		3.46883	47.5114		11.4705	28.4961		4.46874	45.5401		12.4698	39.1102		5.46995	36.8078		13.4702	33.6227		6.47086	41.5169		14.4695	44.6215		7.47001	33.1187		15.4696	40.2166		8.4692	48.5641		16.47	42.7725
1.4726	65.1608		9.47149	42.0567		2.47164	35.4956		10.4713	37.4997		3.47063	45.0778		11.4715	36.0026		4.47041	50.1955		12.471	36.5543		5.47085	43.2735		13.4712	29.7338		6.47177	41.2097		14.4711	47.8096		7.47174	43.0797		15.4712	45.7041		8.4708	51.1409		16.4709	43.4823
1.47357	56.688		9.47281	42.7277		2.4731	33.7002		10.4728	34.0492		3.47195	50.4788		11.4727	33.9209		4.47194	47.7201		12.4728	22.6		5.47231	33.1515		13.4728	32.4596		6.47316	37.6608		14.4729	38.63		7.47341	41.0875		15.4729	36.2472		8.47254	50.7204		16.4722	43.9058
1.47448	59.1663		9.47364	40.3806		2.47491	36.772		10.4738	32.5819		3.47285	48.4329		11.4744	30.1036		4.47298	44.3949		12.4743	27.2942		5.47411	32.8771		13.4745	29.7159		6.47503	40.7057		14.4739	38.0932		7.47438	34.1506		15.4739	35.7014		8.47365	50.3565		16.4739	40.7385
1.47607	51.0096		9.47475	45.2478		2.47616	43.8044		10.475	29.5459		3.47424	44.5171		11.476	33.0203		4.47402	46.1097		12.4751	35.3137		5.47536	38.8149		13.4757	29.7546		6.47628	33.0352		14.4747	42.2118		7.47528	37.1568		15.4748	40.3985		8.47462	51.967		16.4755	33.071
1.47767	55.8529		9.47649	45.2269		2.47706	51.0544		10.4768	38.5197		3.47605	38.9581		11.4769	30.6434		4.47569	46.4855		12.4762	34.5532		5.4762	30.8611		13.4766	34.7739		6.47704	39.483		14.4763	37.2462		7.47681	36.775		15.4763	40.8101		8.47622	44.711		16.4764	39.7365
1.47878	62.8733		9.47795	36.5901		2.47859	47.1058		10.4783	42.3907		3.47737	42.5697		11.4781	31.0639		4.47742	42.3132		12.4779	32.9099		5.47752	41.2157		13.4782	33.2678		6.47829	39.6768		14.4779	46.4914		7.47848	33.9478		15.478	40.9533		8.47795	54.1292		16.4776	41.7704
1.47975	58.2776		9.47899	40.6192		2.48039	49.1606		10.4792	37.1896		3.47827	46.1544		11.4799	32.1017		4.47854	44.8124		12.4794	26.8946		5.47925	32.722		13.48	36.441		6.48003	32.7042		14.479	42.9902		7.47959	33.3871		15.4792	39.6947		8.47899	58.546		16.4793	32.4835
1.48128	57.3352		9.4801	46.1514		2.48164	46.9984		10.4802	40.4254		3.47966	39.7424		11.4815	31.6574		4.47944	41.3767		12.4804	24.9441		5.48057	34.5651		13.4811	32.7071		6.48142	27.0497		14.4801	42.3311		7.48056	39.6947		15.4802	27.324		8.47983	48.5224		16.4809	37.625
1.48302	48.5522		9.48177	38.8656		2.48241	47.073		10.4818	40.7922		3.48146	46.9239		11.4823	33.2887		4.48104	43.1423		12.4815	31.0281		5.48154	33.2499		13.4819	36.4977		6.48239	36.0921		14.4815	45.4267		7.48202	35.3644		15.4816	40.1212		8.48129	49.9628		16.4819	38.5227
1.48434	53.3299		9.48343	37.3536		2.48373	41.4304		10.4834	34.6904		3.48285	40.3001		11.4833	32.3791		4.48284	48.582		12.4831	39.0177		5.48279	33.2618		13.4833	37.3238		6.48357	38.0902		14.4834	38.8656		7.48382	31.9765		15.4833	47.0074		8.48295	54.0218		16.483	37.2015
1.48524	57.8243		9.48448	37.798		2.48539	42.1044		10.4845	36.8317		3.48362	42.7456		11.485	33.6466		4.48402	45.7458		12.4849	32.8264		5.48453	33.7509		13.4851	38.3109		6.48524	29.7069		14.4847	32.6326		7.48514	28.347		15.4847	43.533		8.4842	56.2227		16.4848	30.6672
1.48656	47.7858		9.48545	43.3689		2.48671	35.6358		10.4855	38.3437		3.4848	47.4935		11.4865	31.2816		4.48492	50.2193		12.486	32.9278		5.48606	31.9198		13.4862	34.1148		6.48691	30.8193		14.4856	42.3907		7.48605	32.6027		15.4857	37.3804		8.48517	58.9724		16.4864	31.8512
1.48836	42.4563		9.48704	35.9758		2.48769	40.9831		10.4871	38.305		3.48646	49.6974		11.4876	33.6555		4.48645	45.8085		12.4869	41.669		5.48703	30.0588		13.4872	30.193		6.48795	30.2169		14.4869	46.4467		7.48737	35.7461		15.4869	28.7347		8.48649	60.3145		16.4873	35.9787
1.48982	44.6245		9.48878	37.291		2.48894	41.7376		10.4887	38.4749		3.48792	36.9033		11.4886	38.797		4.48826	45.1046		12.4885	29.6622		5.48814	32.3075		13.4885	30.867		6.48899	36.7631		14.4887	38.132		7.48917	38.9432		15.4887	24.9531		8.48823	55.1849		16.4882	45.9785
1.49073	58.8621		9.48996	33.6406		2.49067	45.2657		10.49	29.0657		3.48896	36.7184		11.4902	32.048		4.48951	44.6155		12.4903	28.2694		5.48988	33.1634		13.4903	37.8785		6.49066	42.2058		14.4902	37.2343		7.49056	34.3534		15.4902	35.2063		8.48969	58.1135		16.4898	47.1147
1.49205	56.1929		9.49086	34.5621		2.4922	47.4249		10.4909	28.9852		3.49008	36.1249		11.4919	34.7888		4.49027	43.6582		12.4915	33.8434		5.49154	32.224		13.4918	39.7872		6.49232	31.2219		14.4911	35.1019		7.49153	41.3767		15.4911	33.4796		8.49066	53.8727		16.4914	40.3419
1.49385	48.0542		9.49246	41.7406		2.49324	46.6674		10.4923	32.0182		3.49174	35.7282		11.4931	33.0292		4.49166	37.7413		12.4924	38.4481		5.49252	33.0471		13.4928	36.4947		6.49343	29.7367		14.4923	36.0473		7.49278	39.1758		15.4923	34.5741		8.49184	55.9036		16.4925	35.8505
1.49524	45.3581		9.4942	45.0032		2.49435	50.783		10.4941	38.5793		3.49341	34.2281		11.494	37.5594		4.49333	40.0794		12.4939	48.3882		5.49356	34.4667		13.4939	37.8904		6.4944	30.3153		14.4941	52.5783		7.49459	37.0106		15.4942	29.8173		8.49358	65.8497		16.4935	37.2164
1.49607	53.8279		9.49531	39.6052		2.49602	54.4751		10.4955	37.4699		3.49452	37.9411		11.4956	36.9927		4.49465	44.8094		12.4957	39.6917		5.49522	37.6041		13.4957	39.5158		6.49607	33.5899		14.4956	47.5502		7.49605	35.2868		15.4957	26.0834		8.4951	75.8405		16.495	38.97
1.49718	51.5345		9.49614	43.017		2.49769	46.9119		10.4963	31.3382		3.49549	43.0468		11.4973	39.5367		4.49562	47.3414		12.4969	34.1744		5.49696	32.734		13.4973	38.9849		6.49781	28.177		14.4964	36.5603		7.49681	32.5878		15.4965	32.3164		8.49608	60.3592		16.4968	35.7998
1.49885	42.2744		9.49753	37.1359		2.49873	33.5034		10.4977	23.6319		3.49709	48.1705		11.4985	33.405		4.49694	40.5745		12.4976	33.3364		5.49793	44.1652		13.4982	37.2492		6.49885	35.3882		14.4975	41.2246		7.49792	33.1306		15.4976	36.5335		8.49726	47.0014		16.4981	34.1237
			9.49927	31.9645		2.49977	44.5112		10.4996	26.9155		3.49883	31.2875		11.4994	30.2467		4.49867	38.4481		12.499	35.257		5.49884	42.5965		13.4994	42.1432		6.49968	37.115		14.4992	39.3935		7.49966	33.8643		15.4992	33.6257		8.49899	47.1416		16.499	37.7264
