# Supplementary material for: Binding and sequestration of poison frog alkaloids by a plasma globulin
Source: eLife journal article supplement (doi:10.7554/elife.85096), 2023-12-14
Supplement: fig5-data1 [file OsABG+PTX_R2 analysis_CapillaryShapeRawData.xlsx]

## Sheet: RawData
NanoTemper Technologies	NanoTemper Technologies
MO.Affinity Analysis v3.0.5	MO.Affinity Analysis v3.0.5
Origin of exported data	Origin of exported data
Project Title:	20230407_BSA+PTX
Comment:
Project File Path:	C:\Users\nanotemper\Desktop\Aurora_MST\20230407_BSA\BSA+PTX analysis.nta3
Analysis-Set Name:	OsABG+PTX
Exported from:	Capillary Shape (Raw Data Inspection)
Exported on:	2023-04-11 08:20:03
Sample Information	Sample Information		Sample Information	Sample Information		Sample Information	Sample Information		Sample Information	Sample Information		Sample Information	Sample Information		Sample Information	Sample Information		Sample Information	Sample Information		Sample Information	Sample Information		Sample Information	Sample Information		Sample Information	Sample Information		Sample Information	Sample Information		Sample Information	Sample Information		Sample Information	Sample Information		Sample Information	Sample Information		Sample Information	Sample Information		Sample Information	Sample Information
Merge-Set Name:	OsABG+PTX_R2 (#21)		Merge-Set Name:	OsABG+PTX_R2 (#21)		Merge-Set Name:	OsABG+PTX_R2 (#21)		Merge-Set Name:	OsABG+PTX_R2 (#21)		Merge-Set Name:	OsABG+PTX_R2 (#21)		Merge-Set Name:	OsABG+PTX_R2 (#21)		Merge-Set Name:	OsABG+PTX_R2 (#21)		Merge-Set Name:	OsABG+PTX_R2 (#21)		Merge-Set Name:	OsABG+PTX_R2 (#21)		Merge-Set Name:	OsABG+PTX_R2 (#21)		Merge-Set Name:	OsABG+PTX_R2 (#21)		Merge-Set Name:	OsABG+PTX_R2 (#21)		Merge-Set Name:	OsABG+PTX_R2 (#21)		Merge-Set Name:	OsABG+PTX_R2 (#21)		Merge-Set Name:	OsABG+PTX_R2 (#21)		Merge-Set Name:	OsABG+PTX_R2 (#21)
Run Name:	OsABG+PTX_R2 (#21)		Run Name:	OsABG+PTX_R2 (#21)		Run Name:	OsABG+PTX_R2 (#21)		Run Name:	OsABG+PTX_R2 (#21)		Run Name:	OsABG+PTX_R2 (#21)		Run Name:	OsABG+PTX_R2 (#21)		Run Name:	OsABG+PTX_R2 (#21)		Run Name:	OsABG+PTX_R2 (#21)		Run Name:	OsABG+PTX_R2 (#21)		Run Name:	OsABG+PTX_R2 (#21)		Run Name:	OsABG+PTX_R2 (#21)		Run Name:	OsABG+PTX_R2 (#21)		Run Name:	OsABG+PTX_R2 (#21)		Run Name:	OsABG+PTX_R2 (#21)		Run Name:	OsABG+PTX_R2 (#21)		Run Name:	OsABG+PTX_R2 (#21)
Date of Measurement:	2023-04-11 07:54:00		Date of Measurement:	2023-04-11 07:54:26		Date of Measurement:	2023-04-11 07:54:53		Date of Measurement:	2023-04-11 07:55:20		Date of Measurement:	2023-04-11 07:55:47		Date of Measurement:	2023-04-11 07:56:13		Date of Measurement:	2023-04-11 07:56:40		Date of Measurement:	2023-04-11 07:57:07		Date of Measurement:	2023-04-11 07:57:33		Date of Measurement:	2023-04-11 07:58:00		Date of Measurement:	2023-04-11 07:58:27		Date of Measurement:	2023-04-11 07:58:53		Date of Measurement:	2023-04-11 07:59:20		Date of Measurement:	2023-04-11 07:59:47		Date of Measurement:	2023-04-11 08:00:14		Date of Measurement:	2023-04-11 08:00:40
Capillary Type:	Monolith Premium Capillary		Capillary Type:	Monolith Premium Capillary		Capillary Type:	Monolith Premium Capillary		Capillary Type:	Monolith Premium Capillary		Capillary Type:	Monolith Premium Capillary		Capillary Type:	Monolith Premium Capillary		Capillary Type:	Monolith Premium Capillary		Capillary Type:	Monolith Premium Capillary		Capillary Type:	Monolith Premium Capillary		Capillary Type:	Monolith Premium Capillary		Capillary Type:	Monolith Premium Capillary		Capillary Type:	Monolith Premium Capillary		Capillary Type:	Monolith Premium Capillary		Capillary Type:	Monolith Premium Capillary		Capillary Type:	Monolith Premium Capillary		Capillary Type:	Monolith Premium Capillary
Capillary Position:	1		Capillary Position:	9		Capillary Position:	2		Capillary Position:	10		Capillary Position:	3		Capillary Position:	11		Capillary Position:	4		Capillary Position:	12		Capillary Position:	5		Capillary Position:	13		Capillary Position:	6		Capillary Position:	14		Capillary Position:	7		Capillary Position:	15		Capillary Position:	8		Capillary Position:	16
Ligand:	PTX		Ligand:	PTX		Ligand:	PTX		Ligand:	PTX		Ligand:	PTX		Ligand:	PTX		Ligand:	PTX		Ligand:	PTX		Ligand:	PTX		Ligand:	PTX		Ligand:	PTX		Ligand:	PTX		Ligand:	PTX		Ligand:	PTX		Ligand:	PTX		Ligand:	PTX
Ligand Concentration:	0.001		Ligand Concentration:	3.90625e-06		Ligand Concentration:	0.0005		Ligand Concentration:	1.95313e-06		Ligand Concentration:	0.00025		Ligand Concentration:	9.76563e-07		Ligand Concentration:	0.000125		Ligand Concentration:	4.88281e-07		Ligand Concentration:	6.25e-05		Ligand Concentration:	2.44141e-07		Ligand Concentration:	3.125e-05		Ligand Concentration:	1.2207e-07		Ligand Concentration:	1.5625e-05		Ligand Concentration:	6.10352e-08		Ligand Concentration:	7.8125e-06		Ligand Concentration:	3.05176e-08
Target:	OsABG		Target:	OsABG		Target:	OsABG		Target:	OsABG		Target:	OsABG		Target:	OsABG		Target:	OsABG		Target:	OsABG		Target:	OsABG		Target:	OsABG		Target:	OsABG		Target:	OsABG		Target:	OsABG		Target:	OsABG		Target:	OsABG		Target:	OsABG
TargetConcentration:	5e-09		TargetConcentration:	5e-09		TargetConcentration:	5e-09		TargetConcentration:	5e-09		TargetConcentration:	5e-09		TargetConcentration:	5e-09		TargetConcentration:	5e-09		TargetConcentration:	5e-09		TargetConcentration:	5e-09		TargetConcentration:	5e-09		TargetConcentration:	5e-09		TargetConcentration:	5e-09		TargetConcentration:	5e-09		TargetConcentration:	5e-09		TargetConcentration:	5e-09		TargetConcentration:	5e-09
Measurement Settings	Measurement Settings		Measurement Settings	Measurement Settings		Measurement Settings	Measurement Settings		Measurement Settings	Measurement Settings		Measurement Settings	Measurement Settings		Measurement Settings	Measurement Settings		Measurement Settings	Measurement Settings		Measurement Settings	Measurement Settings		Measurement Settings	Measurement Settings		Measurement Settings	Measurement Settings		Measurement Settings	Measurement Settings		Measurement Settings	Measurement Settings		Measurement Settings	Measurement Settings		Measurement Settings	Measurement Settings		Measurement Settings	Measurement Settings		Measurement Settings	Measurement Settings
MST-Power:	Medium		MST-Power:	Medium		MST-Power:	Medium		MST-Power:	Medium		MST-Power:	Medium		MST-Power:	Medium		MST-Power:	Medium		MST-Power:	Medium		MST-Power:	Medium		MST-Power:	Medium		MST-Power:	Medium		MST-Power:	Medium		MST-Power:	Medium		MST-Power:	Medium		MST-Power:	Medium		MST-Power:	Medium
Excitation-Power:	15		Excitation-Power:	15		Excitation-Power:	15		Excitation-Power:	15		Excitation-Power:	15		Excitation-Power:	15		Excitation-Power:	15		Excitation-Power:	15		Excitation-Power:	15		Excitation-Power:	15		Excitation-Power:	15		Excitation-Power:	15		Excitation-Power:	15		Excitation-Power:	15		Excitation-Power:	15		Excitation-Power:	15
Excitation type:	Pico - RED		Excitation type:	Pico - RED		Excitation type:	Pico - RED		Excitation type:	Pico - RED		Excitation type:	Pico - RED		Excitation type:	Pico - RED		Excitation type:	Pico - RED		Excitation type:	Pico - RED		Excitation type:	Pico - RED		Excitation type:	Pico - RED		Excitation type:	Pico - RED		Excitation type:	Pico - RED		Excitation type:	Pico - RED		Excitation type:	Pico - RED		Excitation type:	Pico - RED		Excitation type:	Pico - RED
Thermostat Setpoint:	25		Thermostat Setpoint:	25		Thermostat Setpoint:	25		Thermostat Setpoint:	25		Thermostat Setpoint:	25		Thermostat Setpoint:	25		Thermostat Setpoint:	25		Thermostat Setpoint:	25		Thermostat Setpoint:	25		Thermostat Setpoint:	25		Thermostat Setpoint:	25		Thermostat Setpoint:	25		Thermostat Setpoint:	25		Thermostat Setpoint:	25		Thermostat Setpoint:	25		Thermostat Setpoint:	25
Included	Included		Included	Included		Included	Included		Included	Included		Included	Included		Included	Included		Included	Included		Included	Included		Included	Included		Included	Included		Included	Included		Included	Included		Included	Included		Included	Included		Included	Included		Included	Included
Position [mm]	Relative Fluorescence [-]		Position [mm]	Relative Fluorescence [-]		Position [mm]	Relative Fluorescence [-]		Position [mm]	Relative Fluorescence [-]		Position [mm]	Relative Fluorescence [-]		Position [mm]	Relative Fluorescence [-]		Position [mm]	Relative Fluorescence [-]		Position [mm]	Relative Fluorescence [-]		Position [mm]	Relative Fluorescence [-]		Position [mm]	Relative Fluorescence [-]		Position [mm]	Relative Fluorescence [-]		Position [mm]	Relative Fluorescence [-]		Position [mm]	Relative Fluorescence [-]		Position [mm]	Relative Fluorescence [-]		Position [mm]	Relative Fluorescence [-]		Position [mm]	Relative Fluorescence [-]
-2.24486	0.00321961		-2.24893	0.00161557		-2.24448	0.00156254		-2.24728	0.00119593		-2.24997	0.00151933		-2.24718	0.000416313		-2.24909	0.000681341		-2.24782	0.000954284		-2.24805	0.00142137		-2.24571	0.00176615		-2.24549	0.00019282		-2.24679	0.0010013		-2.24592	0.000821787		-2.246	0.00108997		-2.24859	0.000712473		-2.24887	0.000787072
-2.23986	0.00257093		-2.24455	0.00238645		-2.23666	0.00200204		-2.24353	0.00163775		-2.24591	0.00117225		-2.23874	0.000646251		-2.2444	0.00129186		-2.24157	0.000889109		-2.24055	0.00119189		-2.23821	0.00183316		-2.23768	0.000519842		-2.2421	0.000856105		-2.24091	0.00126207		-2.241	0.00133299		-2.24453	0.00144462		-2.24074	0.00107683
-2.23267	0.0036481		-2.23893	0.00200021		-2.23198	0.00223757		-2.23853	0.00196045		-2.23935	0.00119913		-2.23312	0.000244983		-2.23971	0.000951399		-2.2372	0.00147407		-2.23524	0.000817264		-2.23383	0.00136345		-2.23174	0.000764496		-2.23742	0.00134178		-2.23623	0.00106202		-2.23662	0.00102971		-2.24047	0.00151283		-2.23417	0.000760836
-2.22517	0.00428545		-2.23111	0.00161189		-2.22823	0.00134009		-2.23072	0.00190424		-2.23122	0.00172279		-2.22937	0.000324024		-2.23222	0.000902673		-2.23157	0.00129033		-2.23086	0.001243		-2.22977	0.00125538		-2.22736	0.000786737		-2.23054	0.00184941		-2.22935	0.00108296		-2.22975	0.00155174		-2.23328	0.00126992		-2.23012	0.000747602
-2.21986	0.00344767		-2.22424	0.00214068		-2.22166	0.000934412		-2.22416	0.00194772		-2.2256	0.00138117		-2.22374	0.000611446		-2.22472	0.000903705		-2.22407	0.000588888		-2.2243	0.00167767		-2.22258	0.00137355		-2.22142	0.00077637		-2.22242	0.000971121		-2.22154	0.000740158		-2.22163	0.00119349		-2.22578	0.00093079		-2.22449	0.000709757
-2.21548	0.00309905		-2.21987	0.00161488		-2.21417	0.00121704		-2.21978	0.002127		-2.22216	0.00147125		-2.21593	0.00144003		-2.21971	0.000782509		-2.2172	0.000647129		-2.21649	0.00161976		-2.21539	0.00100274		-2.21361	0.000649143		-2.2171	0.000558618		-2.21623	0.00071034		-2.21599	0.00105774		-2.22078	0.000716749		-2.21606	0.00107497
-2.20892	0.00303704		-2.21455	0.00187582		-2.20854	0.00141396		-2.21447	0.00116169		-2.21591	0.00144164		-2.20968	0.00156937		-2.21534	0.00097824		-2.21251	0.0010502		-2.21024	0.00170487		-2.21039	0.00167598		-2.20674	0.00121724		-2.21304	0.000766699		-2.21185	0.00122718		-2.21194	0.00118488		-2.21641	0.000545046		-2.20949	0.00153258
-2.2008	0.00296755		-2.20674	0.00221678		-2.20416	0.0015449		-2.20697	0.000817257		-2.20841	0.00119031		-2.20531	0.000745726		-2.20784	0.00100302		-2.20751	0.000704677		-2.20586	0.00154767		-2.20602	0.00143527		-2.20268	0.00101386		-2.20648	0.00151739		-2.20529	0.00111172		-2.20569	0.000739448		-2.20984	0.000484319		-2.20605	0.00163242
-2.19548	0.00425493		-2.19955	0.00228805		-2.19823	0.00159533		-2.19947	0.00146704		-2.20279	0.000688695		-2.19999	0.000780082		-2.20003	0.00128732		-2.20001	0.000466164		-2.20024	0.00156186		-2.19914	0.00114042		-2.19736	0.000942049		-2.19835	0.00101045		-2.19716	0.00138663		-2.19756	0.00131445		-2.20172	0.000557234		-2.20106	0.00174967
-2.19142	0.00340851		-2.19518	0.00236668		-2.1901	0.00138969		-2.19478	0.00142031		-2.19841	0.00122369		-2.19249	0.000560025		-2.19565	0.00140088		-2.19251	0.000703984		-2.19242	0.00138931		-2.19133	0.00154725		-2.18955	0.000559424		-2.19242	0.000463724		-2.19154	0.00118108		-2.19163	0.00135683		-2.19609	0.00102637		-2.19324	0.00113835
-2.18455	0.00224399		-2.19049	0.00147073		-2.18385	0.000889383		-2.19009	0.00138376		-2.19247	0.00122516		-2.18531	0.000606955		-2.19159	0.000452162		-2.18751	0.00073634		-2.18555	0.0011198		-2.18539	0.00147795		-2.18236	0.000421076		-2.18835	0.000739031		-2.18748	0.00085964		-2.18756	0.00138884		-2.19172	0.00158681		-2.18637	0.001068
-2.17642	0.00332443		-2.18268	0.00123139		-2.17979	0.000819037		-2.18322	0.00105714		-2.18466	0.000768063		-2.18062	0.00042552		-2.18503	0.0010887		-2.18313	0.000861375		-2.18149	0.000811824		-2.18133	0.00162733		-2.17799	0.00106456		-2.1821	0.000884917		-2.1806	0.000659798		-2.18131	0.00114957		-2.18578	0.00076315		-2.18199	0.0010824
-2.1708	0.00352427		-2.17518	0.00203929		-2.17416	0.000465857		-2.17541	0.00127481		-2.17779	0.000319781		-2.17593	0.00014416		-2.17753	0.00124603		-2.17563	0.000871082		-2.17617	0.000462456		-2.17508	0.00135244		-2.17299	0.00137481		-2.17367	0.00137928		-2.17248	0.000767861		-2.17287	0.00116656		-2.17766	0.00137897		-2.17699	0.00176174
-2.16736	0.00253541		-2.1708	0.00231725		-2.16604	0.000839996		-2.17009	0.00185936		-2.17341	0.00105719		-2.16843	0.000596626		-2.17221	0.00115002		-2.16782	0.00116992		-2.16805	0.000511227		-2.16696	0.000906367		-2.16486	0.000812371		-2.16804	0.00114467		-2.16716	0.00105969		-2.16725	0.00102132		-2.17141	0.000768496		-2.16949	0.00143855
-2.16142	0.00357745		-2.16674	0.00193376		-2.15916	0.00165177		-2.16603	0.00169582		-2.16841	0.00146915		-2.16093	0.000949841		-2.16784	0.00109902		-2.16313	0.000724322		-2.16117	0.000765578		-2.16071	0.00102752		-2.15768	0.000493454		-2.1646	0.00113667		-2.16341	0.000631249		-2.16381	0.00115817		-2.16734	0.000570064		-2.16199	0.00073135
-2.15361	0.00405259		-2.15986	0.00289386		-2.1551	0.00109295		-2.15884	0.001774		-2.1606	0.0012871		-2.15593	0.00110747		-2.16128	0.000764753		-2.15938	0.000993112		-2.15742	0.001079		-2.15664	0.00175124		-2.15361	0.000889838		-2.15898	0.00115794		-2.15748	0.000820729		-2.15819	0.00120364		-2.16141	0.000983392		-2.15699	0.000778481
-2.14767	0.00378901		-2.15268	0.00213194		-2.14979	0.000472705		-2.15072	0.00151469		-2.1531	0.00115482		-2.15156	0.00142005		-2.15346	0.00120143		-2.15251	0.000956827		-2.15274	0.0013932		-2.15071	0.00185496		-2.14924	0.00120762		-2.15117	0.00149292		-2.14998	0.00137119		-2.15037	0.000973202		-2.15328	0.00129772		-2.15262	0.00110585
-2.14361	0.00349586		-2.14768	0.00154292		-2.14135	0.00109336		-2.14603	0.00146473		-2.14872	0.000629694		-2.14406	0.000847447		-2.14721	0.00106991		-2.14501	0.000872006		-2.14524	0.00118898		-2.14258	0.00150664		-2.14205	0.00109472		-2.14492	0.00128187		-2.14373	0.00128386		-2.14413	0.00150472		-2.14672	0.000753314		-2.14574	0.00144621
-2.13798	0.00319734		-2.14299	0.00148176		-2.13448	0.00147103		-2.14228	0.00121189		-2.14404	0.00105971		-2.13625	0.001233		-2.14315	0.000694348		-2.1397	0.00117616		-2.13805	0.00114409		-2.13633	0.00175308		-2.13486	0.000472909		-2.14054	0.000870054		-2.13935	0.0007133		-2.13943	0.00156233		-2.14328	0.000672059		-2.13762	0.000841168
-2.13017	0.00384007		-2.13643	0.00192962		-2.13073	0.00148348		-2.13572	0.00115938		-2.13622	0.000836723		-2.13156	0.000796923		-2.13721	0.000898544		-2.13563	0.00124087		-2.13336	0.00164794		-2.13258	0.00180906		-2.12986	0.00115956		-2.13523	0.00156381		-2.13373	0.000470529		-2.13412	0.00145263		-2.13797	0.00122587		-2.13231	0.000498014
-2.12298	0.0036074		-2.1283	0.00233219		-2.12635	0.00104169		-2.12822	0.00178233		-2.12872	0.00143093		-2.12781	0.000555534		-2.12909	0.000670604		-2.12907	0.000997041		-2.12867	0.00102323		-2.12758	0.00155849		-2.12549	0.00105985		-2.12742	0.00137699		-2.12623	0.000473912		-2.12662	0.000892856		-2.13047	0.000963934		-2.12793	0.000978151
-2.11861	0.00298367		-2.12268	0.00209332		-2.11885	0.00146895		-2.12259	0.00256928		-2.12435	0.00169444		-2.12124	0.000939512		-2.12253	0.000597722		-2.12126	0.000890958		-2.12149	0.00144585		-2.12008	0.00144583		-2.11861	0.000848183		-2.12023	0.00101434		-2.11904	0.000677562		-2.11912	0.00145506		-2.12391	0.000573485		-2.12105	0.00122542
-2.11392	0.00289767		-2.1183	0.00160407		-2.11166	0.00129361		-2.11822	0.00185057		-2.12029	0.000887745		-2.11343	0.000666011		-2.11846	0.00133357		-2.11501	0.000159702		-2.11367	0.00170234		-2.11352	0.0012735		-2.11049	0.000487046		-2.11554	0.0006606		-2.11466	0.000741849		-2.11443	0.00150163		-2.11953	0.00100734		-2.11293	0.00121706
-2.10611	0.00288173		-2.11237	0.00163005		-2.10698	0.00183811		-2.11197	0.00125214		-2.11341	0.000602189		-2.10812	0.000551043		-2.11284	0.000953257		-2.11094	0.000148378		-2.10836	0.00154981		-2.10883	0.00129232		-2.10486	0.000387902		-2.11085	0.000825236		-2.10967	0.000750731		-2.10975	0.00115972		-2.11453	0.000995366		-2.10762	0.00119361
-2.09861	0.0035953		-2.10424	0.00240415		-2.10229	0.00172108		-2.10415	0.00113579		-2.10591	0.000815096		-2.10406	0.000333904		-2.10471	0.000819054		-2.10532	0.000726634		-2.10399	0.00172702		-2.10352	0.000901319		-2.1008	0.000913964		-2.10335	0.00160863		-2.10217	0.000859852		-2.10225	0.00144866		-2.10703	0.000929935		-2.10418	0.00116737
-2.09392	0.00310135		-2.09799	0.00165373		-2.09541	0.00114918		-2.09759	0.00173306		-2.10091	0.000929739		-2.0975	0.000576866		-2.09815	0.000656978		-2.0972	0.000720856		-2.09742	0.000964551		-2.09633	0.00147681		-2.09424	0.00208333		-2.09585	0.00119292		-2.09467	0.000943807		-2.09475	0.00144424		-2.09953	0.00105438		-2.09793	0.000796126
-2.08923	0.0036552		-2.09393	0.00141693		-2.0876	0.000922792		-2.09353	0.00127805		-2.09654	0.000577622		-2.08968	0.00046998		-2.0944	0.00137982		-2.09032	0.00142183		-2.0893	0.000901594		-2.08883	0.00157065		-2.08643	0.000858173		-2.09086	0.0012821		-2.08998	0.00102417		-2.08975	0.00122461		-2.09453	0.000889094		-2.09012	0.000259571
-2.08173	0.00350104		-2.08799	0.00158775		-2.08229	0.000974461		-2.08822	0.00124566		-2.08997	0.0011691		-2.08343	0.000704859		-2.0894	0.00114858		-2.08626	0.00172506		-2.08367	0.00139009		-2.08383	0.0015835		-2.08049	0.000652912		-2.08616	0.00117669		-2.08529	0.00100746		-2.08537	0.00151752		-2.09015	0.00118418		-2.08418	0.000563255
-2.07423	0.00269897		-2.07987	0.00197561		-2.07791	0.00148016		-2.0804	0.00176776		-2.08185	0.00140427		-2.07937	0.00082836		-2.0819	0.000769708		-2.08063	0.00111676		-2.07961	0.00152882		-2.07914	0.00144032		-2.07642	0.000269722		-2.07898	0.00108934		-2.07779	0.00151521		-2.07787	0.00183626		-2.08297	0.00104198		-2.08011	0.00113092
-2.06986	0.0034375		-2.07361	0.00193146		-2.07135	0.00149904		-2.07322	0.00201943		-2.07591	0.00107819		-2.07375	0.000907402		-2.07503	0.00101953		-2.07251	0.000649903		-2.07305	0.00123989		-2.07227	0.001416		-2.07018	0.000597121		-2.07117	0.000859078		-2.06998	0.001198		-2.07006	0.00151134		-2.07515	0.000444975		-2.07418	0.000888764
-2.0658	0.00344691		-2.06986	0.00199239		-2.06323	0.0015144		-2.06884	0.00171039		-2.07185	0.000887535		-2.06562	0.000986667		-2.07034	0.000840733		-2.06595	0.000552371		-2.06492	0.000781123		-2.06446	0.00122623		-2.06174	0.00106701		-2.06648	0.00063499		-2.0656	0.000769341		-2.06538	0.00120144		-2.06984	0.000818531		-2.06637	0.00137587
-2.05892	0.00285428		-2.06487	0.00244554		-2.05729	0.00101036		-2.06384	0.00159357		-2.06591	0.000588331		-2.05906	0.00109176		-2.06565	0.000673908		-2.0622	0.000390358		-2.0593	0.00129196		-2.05915	0.00125859		-2.0558	0.000951284		-2.06273	0.000525462		-2.06185	0.00113773		-2.06162	0.00162568		-2.06578	0.00166828		-2.05949	0.00130993
-2.05142	0.00297331		-2.05737	0.00148199		-2.05354	0.000637259		-2.05603	0.00115429		-2.05779	0.000335319		-2.05499	0.00142903		-2.05847	0.00085787		-2.0572	0.000841037		-2.05555	0.00103955		-2.05477	0.00123771		-2.05237	0.000956374		-2.05585	0.000526148		-2.05498	0.000781395		-2.05506	0.00167535		-2.05859	0.000692373		-2.05511	0.00132873
-2.04642	0.00358762		-2.05049	0.00142681		-2.04698	0.00129236		-2.04884	0.0013641		-2.05122	0.000654681		-2.04937	0.000775816		-2.05065	0.0013026		-2.0497	0.000606915		-2.04961	0.000662206		-2.04789	0.00166152		-2.04674	0.000926216		-2.04867	0.00116068		-2.04748	0.00106117		-2.04725	0.0015098		-2.05047	0.000491803		-2.05012	0.00136403
-2.04173	0.0025978		-2.04612	0.00168247		-2.03854	0.00140815		-2.04478	0.00181402		-2.04716	0.00114433		-2.04125	0.00113262		-2.04534	0.00112008		-2.04282	0.000895349		-2.04211	0.000920637		-2.03977	0.00109177		-2.03924	0.000977861		-2.04336	0.00122013		-2.04216	0.000797467		-2.04194	0.0014619		-2.04547	0.00080955		-2.0423	0.00102969
-2.03517	0.00263236		-2.04112	0.0016758		-2.03291	0.000964501		-2.04041	0.0020805		-2.04154	0.00125939		-2.03437	0.00112476		-2.04097	0.00103873		-2.03813	0.000569474		-2.03586	0.000950755		-2.03477	0.00119182		-2.03268	0.000763365		-2.03898	0.00124231		-2.03779	0.000824959		-2.03756	0.00149258		-2.04172	0.00115082		-2.0348	0.00106707
-2.02736	0.0036049		-2.03362	0.00164132		-2.02948	0.00112138		-2.03322	0.00185612		-2.0331	0.000866119		-2.03062	0.000956578		-2.0344	0.00111864		-2.03344	0.000443283		-2.03149	0.000925883		-2.03102	0.00098622		-2.0283	0.000509098		-2.03242	0.000685753		-2.03123	0.000578169		-2.03131	0.00220951		-2.03547	0.000562152		-2.03043	0.000818183
-2.02142	0.00357879		-2.02612	0.00168339		-2.02385	0.00159429		-2.02603	0.00162734		-2.02685	0.000759455		-2.02593	0.000579785		-2.02628	0.000781064		-2.02626	0.000762457		-2.02586	0.00134423		-2.02477	0.000639276		-2.02299	0.00108209		-2.02429	0.000504883		-2.0231	0.00133926		-2.02318	0.00193757		-2.02765	0.00100713		-2.02574	0.0014627
-2.01736	0.00327125		-2.02112	0.00221195		-2.01604	0.0012961		-2.02103	0.00149989		-2.0231	0.00098937		-2.01843	0.00073652		-2.02096	0.00113268		-2.01845	0.000690579		-2.01805	0.00133918		-2.01727	0.00103005		-2.01549	0.000678169		-2.01804	0.000912813		-2.01716	0.00139678		-2.01694	0.000760417		-2.02203	0.00081682		-2.01793	0.0016965
-2.01142	0.00376175		-2.01674	0.00213792		-2.0101	0.00134113		-2.01666	0.00126995		-2.0181	0.00142001		-2.01156	0.00116855		-2.0169	0.000816989		-2.01344	0.000464546		-2.01086	0.00150356		-2.01165	0.00128681		-2.00799	0.000628786		-2.01398	0.00114742		-2.0131	0.000380864		-2.01287	0.000972981		-2.01797	0.000652601		-2.01043	0.000646142
-2.0033	0.0046239		-2.00987	0.00222391		-2.00573	0.00183708		-2.00978	0.00136734		-2.0106	0.00085436		-2.00687	0.00128038		-2.01003	0.000638602		-2.00907	0.00092655		-2.00649	0.00115905		-2.00727	0.00106745		-2.0033	0.000674965		-2.00835	0.000872569		-2.00716	0.000799159		-2.00725	0.00104913		-2.01203	0.00101269		-2.00637	0.00104037
-1.99673	0.00398828		-2.00174	0.00215999		-2.0001	0.00136603		-2.00165	0.00153759		-2.00404	0.000750426		-2.00218	0.00165897		-2.0019	0.000401578		-2.00251	0.000867384		-2.0018	0.00140194		-2.00133	0.000863229		-1.99892	0.00107625		-2.00054	0.00114125		-1.99935	0.00120455		-1.99912	0.00051342		-2.0039	0.000772344		-2.00199	0.00119059
-1.99267	0.0044519		-1.99643	0.00176386		-1.9926	0.000774423		-1.99603	0.00143327		-1.99935	0.00127745		-1.995	0.000741235		-1.99628	0.000819673		-1.99438	0.000497596		-1.99399	0.00125699		-1.99321	0.00127396		-1.99143	0.00113487		-1.99367	0.000532322		-1.99279	0.000617503		-1.99225	0.0012564		-1.99734	0.000639344		-1.9948	0.00129437
-1.98705	0.00393913		-1.99236	0.00242531		-1.98542	0.000604058		-1.99197	0.00142147		-1.99435	0.00140301		-1.98718	0.000189519		-1.99284	0.000325185		-1.98876	0.000522557		-1.98649	0.00164832		-1.98665	0.00112871		-1.98361	0.00133089		-1.98929	0.000484303		-1.98842	0.00111616		-1.98819	0.0016429		-1.99328	0.000297861		-1.98762	0.00111513
-1.97861	0.00367478		-1.98518	0.00208412		-1.98073	0.000825055		-1.98572	0.00177446		-1.98716	0.00150043		-1.98187	0.000287871		-1.9869	0.000229798		-1.9847	0.000686881		-1.9818	0.001796		-1.98227	0.00104381		-1.97892	0.00110942		-1.98366	0.00103766		-1.98279	0.00158394		-1.98287	0.00152326		-1.98797	0.000356664		-1.98262	0.000966774
-1.97236	0.00334766		-1.97737	0.00174294		-1.97604	0.00116371		-1.97728	0.0017511		-1.97966	0.000975092		-1.97749	0.000987565		-1.9794	0.000535988		-1.97813	0.000458075		-1.97711	0.00149307		-1.97696	0.00158396		-1.97455	0.000853084		-1.97585	0.00110855		-1.97466	0.00135089		-1.97475	0.00151819		-1.97984	0.000420598		-1.97824	0.000855795
-1.96861	0.00235956		-1.97236	0.00153441		-1.96854	0.00122783		-1.97134	0.00182258		-1.97466	0.000767014		-1.97093	0.000328066		-1.97346	0.000438742		-1.97001	0.000569705		-1.96961	0.00132072		-1.96946	0.00127855		-1.96705	0.000739239		-1.96898	0.000968149		-1.9681	0.00106731		-1.96787	0.00173009		-1.97297	0.000713114		-1.97137	0.000955166
-1.96361	0.00296774		-1.96861	0.001685		-1.96073	0.00135275		-1.96759	0.00174069		-1.96997	0.000803968		-1.96281	0.000401269		-1.96909	0.000930753		-1.96438	0.000751363		-1.96211	0.00170798		-1.96227	0.00103555		-1.95924	0.000799931		-1.96523	0.00170947		-1.96435	0.000752423		-1.96413	0.00198062		-1.96859	0.000718888		-1.96355	0.000987902
-1.95611	0.00378766		-1.96237	0.00248692		-1.95604	0.00128199		-1.96134	0.00141476		-1.9631	0.000798299		-1.95749	0.000883824		-1.96315	0.000864477		-1.96095	0.00120643		-1.95774	0.00213798		-1.95758	0.000861852		-1.95455	0.000836685		-1.96054	0.00117211		-1.95935	0.00119567		-1.95943	0.0011968		-1.96328	0.00116899		-1.95793	0.000665876
-1.94923	0.00289844		-1.95487	0.0025152		-1.95166	0.00121683		-1.95291	0.00100555		-1.95497	0.000927219		-1.95343	0.000709574		-1.95534	0.000654087		-1.95469	0.00041162		-1.95367	0.00211972		-1.95289	0.00129163		-1.9508	0.000785795		-1.95304	0.00103972		-1.95185	0.000543064		-1.95193	0.000704573		-1.95547	0.000782394		-1.95386	0.000976061
-1.94455	0.00359319		-1.94893	0.00267269		-1.94416	0.00195453		-1.94728	0.000983115		-1.94966	0.00135849		-1.94656	0.000646476		-1.94846	0.00042367		-1.94719	0.000732412		-1.9468	0.00123075		-1.94508	0.0016847		-1.94424	0.000980311		-1.94617	0.000988271		-1.94498	0.000481314		-1.94506	0.00133785		-1.94828	0.000492872		-1.94761	0.00117364
-1.93986	0.00374389		-1.94455	0.00270396		-1.93635	0.00152809		-1.94353	0.00176197		-1.9456	0.000797669		-1.93843	0.00110029		-1.94378	0.000517819		-1.94126	0.000935102		-1.93961	0.00152047		-1.93758	0.000937115		-1.93674	0.00104986		-1.94148	0.000935908		-1.9406	0.000670371		-1.94038	0.001282		-1.94422	0.000575196		-1.93949	0.000770819
-1.93267	0.00306545		-1.93893	0.00215286		-1.93167	0.000932959		-1.93791	0.0014409		-1.93841	0.000549277		-1.93281	0.00116676		-1.93909	0.000311765		-1.93688	0.000625866		-1.9343	0.00100497		-1.93352	0.00139282		-1.93111	0.000851199		-1.93679	0.000167608		-1.9356	0.00073191		-1.93568	0.00125221		-1.93984	0.000696863		-1.93324	0.00112721
-1.92486	0.00369859		-1.93112	0.00167971		-1.92792	0.000920094		-1.93041	0.00111589		-1.9306	0.00139839		-1.92937	0.000941308		-1.93128	0.000391048		-1.93126	0.00107123		-1.92992	0.00110756		-1.92914	0.00175239		-1.92674	0		-1.9296	0.000999018		-1.92841	0.000845049		-1.9285	0.00168131		-1.93266	0.000558731		-1.92918	0.0013357
-1.91986	0.00389843		-1.92424	0.00286029		-1.92104	0.00140151		-1.92415	0.00110502		-1.92529	0.00108994		-1.92343	0.00134325		-1.92378	0.000744106		-1.92344	0.00153069		-1.92336	0.00137668		-1.92196	0.0014277		-1.9208	0.000545664		-1.92179	0.00101617		-1.9206	0.000780972		-1.92068	0.00150428		-1.92578	0.000717605		-1.92324	0.00148011
-1.91548	0.00312957		-1.91987	0.0038535		-1.91354	0.00183604		-1.91947	0.000969467		-1.92185	0.00134926		-1.91593	0.000865186		-1.91909	0.000954703		-1.91657	0.00138		-1.91524	0.000488105		-1.91477	0.00207088		-1.91267	0.000635949		-1.91648	0.000980725		-1.9156	0.00101317		-1.91537	0.00102265		-1.92078	0.000582893		-1.9148	0.0016619
-1.90861	0.00362544		-1.91455	0.00269591		-1.90823	0.00127037		-1.91447	0.00139533		-1.9156	0.000950526		-1.91	0.00080119		-1.9144	0.000741835		-1.91219	0.00103217		-1.9093	0.00112233		-1.90977	0.00158878		-1.90643	0.00113298		-1.91211	0.000793224		-1.91123	0.0015501		-1.91099	0.000537038		-1.91641	0.000783677		-1.90887	0.00107868
-1.9008	0.00310538		-1.90674	0.00216045		-1.90416	0.0013266		-1.90697	0.00199491		-1.9081	0.000915461		-1.90531	0.000677464		-1.9069	0.00110047		-1.9072	0.000744429		-1.90524	0.00153737		-1.90539	0.0012953		-1.90205	0.000935829		-1.90554	0.00137608		-1.90466	0.00139065		-1.90443	0.000961944		-1.90953	0.000769351		-1.90512	0.000689558
-1.89548	0.00303378		-1.89955	0.00246324		-1.8976	0.00122824		-1.89947	0.00130558		-1.90216	0.000713052		-1.89968	0.000457181		-1.8994	0.00107672		-1.89939	0.000648516		-1.8993	0.00108386		-1.89852	0.00112596		-1.89643	0.00129847		-1.89741	0.00162989		-1.89654	0.00106963		-1.89631	0.00158374		-1.90141	0.000538417		-1.90011	0.00147083
-1.89142	0.00379285		-1.89518	0.0029941		-1.88948	0.00139529		-1.89478	0.00140042		-1.8981	0.00098727		-1.89218	0.00102012		-1.89503	0.000734403		-1.89219	0.000796662		-1.89117	0.00147286		-1.89071	0.00175055		-1.88862	0.00133127		-1.89148	0.000858849		-1.89123	0.000973836		-1.89069	0.00155063		-1.89578	0.00112473		-1.8923	0.00162058
-1.88455	0.00416873		-1.89018	0.00239887		-1.88354	0.00147082		-1.89009	0.00119639		-1.89216	0.00107021		-1.885	0.00166997		-1.89065	0.000552918		-1.88751	0.00104927		-1.88492	0.000727882		-1.88508	0.00222921		-1.88174	0.00103045		-1.88742	0.000675921		-1.88717	0.00110135		-1.88663	0.000835907		-1.89172	0.00145253		-1.88574	0.0014158
-1.87611	0.00359895		-1.88236	0.00226414		-1.87948	0.00204687		-1.88291	0.00101411		-1.88404	0.000779402		-1.88062	0.0016565		-1.88378	0.00101066		-1.88282	0.000472404		-1.88055	0.00104869		-1.88102	0.00170879		-1.87736	0.000900771		-1.88116	0.00146297		-1.88029	0.000250173		-1.88006	0.00107165		-1.88547	0.00132145		-1.88106	0.000728796
-1.87111	0.00374696		-1.87518	0.00202641		-1.87385	0.00185513		-1.87509	0.0010879		-1.87747	0.00104459		-1.87562	0.000752912		-1.87659	0.00129248		-1.87532	0.000850281		-1.87492	0.001591		-1.87477	0.000857492		-1.87205	0.000544534		-1.87273	0.00113507		-1.87185	0.000201957		-1.87193	0.00125044		-1.87734	0.000746257		-1.87605	0.00136704
-1.86767	0.00330677		-1.87111	0.00169627		-1.86573	0.00164098		-1.87009	0.00173213		-1.87341	0.00137424		-1.86812	0.00126533		-1.87128	0.00105752		-1.86782	0.00147638		-1.8668	0.00114312		-1.86664	0.00112481		-1.86393	0.000562817		-1.8671	0.00103469		-1.86654	0.000126461		-1.86631	0.00140098		-1.8714	0.00117755		-1.86855	0.00114648
-1.86142	0.00314781		-1.86705	0.00254877		-1.85916	0.000336787		-1.86572	0.0019771		-1.8681	0.00144038		-1.86062	0.00113038		-1.8669	0.000464137		-1.86345	0.000325876		-1.86024	0.00138931		-1.86039	0.00152017		-1.85674	0.000809355		-1.86367	0.000903895		-1.8631	0.000769975		-1.86288	0.00138332		-1.86734	0.000876906		-1.86105	0.000690022
-1.85361	0.00280552		-1.85986	0.00284512		-1.8551	0.00047893		-1.85853	0.00130743		-1.86029	0.000746017		-1.85593	0.000516911		-1.86034	0.000256019		-1.85907	0.000896274		-1.85649	0.00192172		-1.85634	0.00151788		-1.85299	0.000643865		-1.85804	0.000809001		-1.85685	0.000959244		-1.85693	0.00129635		-1.86109	0.00100649		-1.85637	0.000774534
-1.84798	0.00343174		-1.85268	0.00239519		-1.84948	0.00110872		-1.85072	0.000941477		-1.8531	0.00125267		-1.85125	0.000729334		-1.85253	0.000901641		-1.8522	0.00137607		-1.85149	0.00183098		-1.85039	0.00166221		-1.8483	0.000705877		-1.85054	0.000779961		-1.84904	0.000618772		-1.84912	0.00075821		-1.85266	0.000858517		-1.85199	0.000512177
-1.84361	0.00328584		-1.84768	0.00252187		-1.84104	0.000833148		-1.84603	0.00136063		-1.84841	0.00134737		-1.84375	0.00113779		-1.84659	0.000876039		-1.84501	0.000949662		-1.84399	0.00115905		-1.84195	0.00177074		-1.84111	0.000956751		-1.84429	0.000678207		-1.8431	0.000694056		-1.84318	0.00117583		-1.84672	0.00163471		-1.84449	0.000397483
-1.83767	0.00249087		-1.84299	0.0020163		-1.83448	0.00125605		-1.84228	0.00111358		-1.84341	0.000820765		-1.83624	0.00106683		-1.84253	0.000768676		-1.8397	0.00103818		-1.83711	0.0011917		-1.83571	0.00118631		-1.83393	0.00133674		-1.83992	0.00143347		-1.83904	0.000439442		-1.83881	0.00168815		-1.84328	0.00143713		-1.83668	0.000596456
-1.82986	0.00315683		-1.83643	0.00134014		-1.83104	0.0010834		-1.83572	0.00117627		-1.8356	0.000832104		-1.83187	0.000785247		-1.83628	0.000745965		-1.83532	0.000991263		-1.83242	0.00113807		-1.83227	0.00123312		-1.82893	0.00106758		-1.83429	0.000479959		-1.8331	0.000733814		-1.83318	0.00120409		-1.83766	0.00109971		-1.83137	0.000951915
-1.8233	0.00262314		-1.8283	0.00200067		-1.82604	0.000831903		-1.82822	0.00129401		-1.82841	0.00141162		-1.82812	0.00124445		-1.82815	0.00128092		-1.82876	0.00119765		-1.82774	0.000978735		-1.82695	0.00151352		-1.82424	0.00109227		-1.82679	0.000716394		-1.82529	0.000927523		-1.82537	0.000656453		-1.83016	0.000805702		-1.82731	0.00108704
-1.81892	0.00333921		-1.82268	0.00363876		-1.81854	0.00181446		-1.8229	0.0013722		-1.82435	0.00159891		-1.82124	0.000982625		-1.82159	0.00172833		-1.82095	0.000831099		-1.82024	0.000722636		-1.81945	0.000943081		-1.81736	0.000951096		-1.8196	0.000953972		-1.81841	0.0011574		-1.81818	0.00108114		-1.82359	0.000120385		-1.82011	0.00156137
-1.81361	0.00377922		-1.81862	0.00284328		-1.81167	0.00146107		-1.81853	0.000792043		-1.81997	0.000948426		-1.81374	0.00123412		-1.81784	0.00149317		-1.81501	0.00109919		-1.81274	0.000569909		-1.81289	0.00132353		-1.80924	0.000757333		-1.81492	0.000917844		-1.81435	0.000981238		-1.81381	0.00102485		-1.81922	0.000424233		-1.81199	0.000960274
-1.8058	0.00364138		-1.81236	0.00362497		-1.80698	0.00103049		-1.81228	0.0014483		-1.81279	0.000421406		-1.80843	0.00150874		-1.8119	0.000799853		-1.81095	0.000871775		-1.80774	0.000989811		-1.80852	0.0015959		-1.80393	0.0010165		-1.81023	0.000874398		-1.80904	0.00103749		-1.80912	0.00132438		-1.81391	0.000778973		-1.80699	0.000452972
-1.79861	0.00298482		-1.80424	0.00304491		-1.80229	0.000606133		-1.80447	0.00186838		-1.8056	0.0006593		-1.80406	0.00168726		-1.80378	0.00107962		-1.80501	0.00114981		-1.80336	0.00111825		-1.80352	0.0021248		-1.79986	0.00121554		-1.80242	0.0013635		-1.80123	0.00137775		-1.80131	0.00134028		-1.80641	0.000733		-1.80356	0.00115507
-1.79423	0.00320118		-1.7983	0.00254601		-1.7951	0.000355878		-1.79822	0.0015214		-1.8006	0.000941077		-1.79749	0.00122132		-1.79721	0.000693316		-1.79688	0.00216996		-1.79649	0.000929575		-1.7957	0.00204701		-1.7933	0.000675531		-1.79492	0.00170101		-1.79404	0.00100788		-1.79381	0.000934795		-1.79922	0.00076764		-1.79699	0.00117039
-1.78955	0.00359838		-1.79424	0.00266533		-1.78729	0.00102157		-1.79384	0.00104488		-1.79622	0.00103535		-1.78968	0.000547674		-1.79378	0.000748442		-1.79063	0.00120967		-1.78836	0.000723802		-1.78852	0.0016255		-1.78518	0.000583927		-1.79023	0.0014209		-1.78935	0.000924563		-1.78912	0.000690004		-1.79422	0.000754169		-1.78918	0.00108077
-1.78173	0.0026026		-1.78799	0.00281546		-1.78229	0.000908059		-1.78822	0.000868379		-1.78935	0.00105908		-1.78375	0.000279339		-1.78878	0.00138993		-1.78626	0.00112069		-1.78305	0.0012461		-1.78383	0.00120444		-1.77924	0.00113016		-1.78554	0.00150184		-1.78466	0.000714992		-1.78475	0.000886013		-1.78984	0.000533713		-1.78355	0.000799841
-1.77423	0.00307332		-1.77955	0.00359968		-1.77791	0.000630412		-1.7804	0.0015945		-1.78154	0.00110926		-1.77968	0.000688017		-1.78097	0.000907215		-1.78063	0.00102131		-1.77867	0.00141068		-1.77914	0.00135381		-1.77518	0.00146547		-1.77804	0.000477901		-1.77685	0.000952266		-1.77694	0.00104295		-1.78234	0.0006		-1.77918	0.000624782
-1.76986	0.00328891		-1.77361	0.00321987		-1.77104	0.00117574		-1.77353	0.00171895		-1.7756	0.000968793		-1.77374	0.000973194		-1.7744	0.000780857		-1.77251	0.000439354		-1.77211	0.00106637		-1.77164	0.00140315		-1.76893	0.00091453		-1.77054	0.000851303		-1.76935	0.00105018		-1.76913	0.00117186		-1.77453	0.00142559		-1.77324	0.00141464
-1.7658	0.00355864		-1.76986	0.00247336		-1.76292	0.00110996		-1.76916	0.0010111		-1.77154	0.000311593		-1.76562	0.000934347		-1.76972	0.00122414		-1.76595	0.00111029		-1.76399	0.00127234		-1.76383	0.00142449		-1.7608	0.000834424		-1.76616	0.00135207		-1.76498	0.00025546		-1.76475	0.000992405		-1.76953	0.00113649		-1.76512	0.00102737
-1.75892	0.00316682		-1.76455	0.00306261		-1.7576	0.000899758		-1.76384	0.00146727		-1.76529	0.000914621		-1.75937	0.000942206		-1.76471	0.000896685		-1.7622	0.00105967		-1.75836	0.000763635		-1.75883	0.00148782		-1.75486	0.000768077		-1.76211	0.00155169		-1.76091	0.000321017		-1.761	0.00124271		-1.76516	0.000818103		-1.75855	0.000411413
-1.75142	0.00330273		-1.75705	0.00290742		-1.75354	0.00052562		-1.75572	0.00149827		-1.75716	0.00155439		-1.75499	0.00052724		-1.75753	0.000635711		-1.7572	0.000676943		-1.75492	0.00184419		-1.75446	0.00122601		-1.75143	0.000883241		-1.75523	0.00122676		-1.75404	0.000556599		-1.75413	0.00180889		-1.75797	0.00139373		-1.75418	0.000617584
-1.74642	0.00325205		-1.75049	0.00270878		-1.74666	0.00135441		-1.74884	0.00206547		-1.75122	0.00148384		-1.74937	0.000933674		-1.75003	0.000915268		-1.7497	0.000387815		-1.74899	0.0013794		-1.74727	0.00100481		-1.7458	0.000399966		-1.74805	0.00111335		-1.74654	0.000692153		-1.74662	0.00174488		-1.74984	0.000732786		-1.74887	0.00160107
-1.74205	0.00289344		-1.74611	0.00251497		-1.73854	0.0020699		-1.74509	0.00116123		-1.74716	0.00103136		-1.74125	0.00161361		-1.74503	0.000457943		-1.74282	0.000618008		-1.74117	0.00113982		-1.73946	0.00134693		-1.73799	0.00100312		-1.74273	0.00150321		-1.74123	0.00148751		-1.74131	0.00179741		-1.74516	0.000469351		-1.74106	0.00125305
-1.73517	0.00315607		-1.7408	0.00207768		-1.73323	0.00119484		-1.7404	0.00145987		-1.74122	0.00108512		-1.73468	0.0014553		-1.74034	0.000115002		-1.73813	0.00056878		-1.73524	0.00106695		-1.73477	0.00129507		-1.73174	0.00106946		-1.73804	0.00135047		-1.73685	0.00103157		-1.73694	0.00148287		-1.74141	0.000650035		-1.73417	0.00141162
-1.72705	0.00313533		-1.7333	0.00144153		-1.72979	0.000443446		-1.73322	0.00152533		-1.73279	0.00156846		-1.73093	0.00149213		-1.73346	0.0008684		-1.73345	0.00057502		-1.73117	0.000889936		-1.73102	0.000540838		-1.72736	0.000737354		-1.73179	0.00100245		-1.73029	0.000618983		-1.73069	0.00168528		-1.73484	0.000423378		-1.7298	0.00169162
-1.72142	0.00254405		-1.72611	0.00198687		-1.72354	0.000745787		-1.72634	0.00161046		-1.72654	0.0010784		-1.72593	0.00085351		-1.72565	0.000996615		-1.72626	0.00142623		-1.72524	0.00111553		-1.72445	0.00138525		-1.72205	0.00113336		-1.72367	0.0010292		-1.72216	0.00114153		-1.72256	0.00108335		-1.72734	0.000687883		-1.72449	0.000879941
-1.71736	0.0021386		-1.72112	0.00227196		-1.71604	0.00116558		-1.72134	0.00206246		-1.7231	0.000448282		-1.71843	0.000646027		-1.72034	0.000756907		-1.71845	0.00135897		-1.71742	0.001482		-1.71664	0.00175376		-1.71424	0.00119424		-1.71741	0.000901837		-1.71654	0.000877827		-1.71631	0.000918019		-1.72203	0.000433642		-1.71668	0.00102784
-1.71111	0.00347935		-1.71674	0.00305526		-1.7101	0.001017		-1.71665	0.00180407		-1.71779	0.000742657		-1.71156	0.000670952		-1.71596	0.000599786		-1.71345	0.000700979		-1.71055	0.00127758		-1.71133	0.00141049		-1.70705	0.000999725		-1.71335	0.000661058		-1.71216	0.00119123		-1.71225	0.00118687		-1.71766	0.000374626		-1.70949	0.00192357
-1.70298	0.00374024		-1.70955	0.00342909		-1.70573	0.00113653		-1.70978	0.00170692		-1.70997	0.00131398		-1.70687	0.00100688		-1.70909	0.00079242		-1.70907	0.0012129		-1.70617	0.00100652		-1.70696	0.000974976		-1.70236	0.00108624		-1.70773	0.000852675		-1.70623	0.00169983		-1.70663	0.00122815		-1.7114	0.00121347		-1.70543	0.0014901
-1.69705	0.00314397		-1.70174	0.00320171		-1.7001	0.00101119		-1.70165	0.00140736		-1.70372	0.0011437		-1.70218	0.000589889		-1.70097	0.00122063		-1.7022	0.00156143		-1.70117	0.00108969		-1.70102	0.00175468		-1.69767	0.00123722		-1.69961	0.000485675		-1.6981	0.00143295		-1.6985	0.00123234		-1.70359	0.00117006		-1.70106	0.000925447
-1.69298	0.00274255		-1.69674	0.00256969		-1.69229	0.000531015		-1.69634	0.000969235		-1.69904	0.0015504		-1.695	0.000829259		-1.69565	0.00138539		-1.69407	0.00116899		-1.69336	0.00133102		-1.69289	0.00196533		-1.69017	0.000834235		-1.69304	0.000639792		-1.69185	0.000772513		-1.69193	0.00137361		-1.69703	0.000314968		-1.69387	0.00104827
-1.68673	0.00337645		-1.69237	0.00269384		-1.68541	0.00139653		-1.69228	0.000523248		-1.69404	0.000963754		-1.68718	0.000346254		-1.69221	0.00073048		-1.68876	0.00123625		-1.68617	0.00117285		-1.68664	0.00150962		-1.68268	0.00123194		-1.68898	0.00014177		-1.68779	0.000727046		-1.68756	0.000953115		-1.69297	0.000621382		-1.68668	0.000369157
-1.67861	0.00387635		-1.68518	0.00315986		-1.68104	0.00132432		-1.68572	0.00169489		-1.68654	0.000867798		-1.68218	0.000661521		-1.68596	0.000633027		-1.68469	0.0010918		-1.68149	0.000929186		-1.68227	0.00132903		-1.67768	0.00109811		-1.68336	0.000263417		-1.68185	0.000806983		-1.68194	0.000524677		-1.68765	0.000864932		-1.68168	0.000660768
-1.67236	0.00354443		-1.67705	0.00262809		-1.67604	0.000890005		-1.67759	0.00161462		-1.67904	0.000873677		-1.67781	0.000718556		-1.67846	0.000885123		-1.67782	0.000983405		-1.67649	0.00147675		-1.67665	0.00124436		-1.6733	0.000869482		-1.67492	0.00133904		-1.67341	0.00064288		-1.67412	0.00129613		-1.67953	0.00102402		-1.67731	0.00111676
-1.66861	0.00284161		-1.67236	0.00271246		-1.66823	0.0012822		-1.67166	0.00126278		-1.67435	0.000964804		-1.67093	0.000745502		-1.67253	0.000720982		-1.66969	0.000855597		-1.66899	0.00168311		-1.66884	0.00167276		-1.6658	0.00106324		-1.66836	0.00126152		-1.66716	0.000365849		-1.66725	0.00156763		-1.67234	0.000602779		-1.67043	0.00125374
-1.66361	0.00230523		-1.66861	0.00267085		-1.66104	0.00162977		-1.66759	0.000955125		-1.66966	0.00108428		-1.66281	0.000799843		-1.66846	0.000878929		-1.66438	0.000606915		-1.66149	0.00103411		-1.66195	0.00130012		-1.6583	0.000810298		-1.66492	0.000779504		-1.66341	0.000797255		-1.6635	0.00177777		-1.66828	0.000472131		-1.66231	0.000764783
-1.65611	0.00309924		-1.66205	0.00220229		-1.65635	0.000934205		-1.66103	0.00194934		-1.66247	0.00110191		-1.65749	0.000872147		-1.66253	0.00103667		-1.66095	0.000861606		-1.65711	0.000943565		-1.65758	0.00119732		-1.65361	0.000587885		-1.65992	0.000691012		-1.65841	0.000816288		-1.65881	0.000810303		-1.66297	0.000830505		-1.65668	0.00101019
-1.64955	0.0037533		-1.65455	0.00267315		-1.65135	0.000808454		-1.65291	0.00175318		-1.65466	0.00101772		-1.65343	0.000913015		-1.65471	0.000906389		-1.6547	0.00131298		-1.65305	0.00215586		-1.65258	0.00127327		-1.64986	0.000802193		-1.65242	0.000906639		-1.6506	0.000811213		-1.65131	0.00143078		-1.65484	0.00098104		-1.65262	0.00116552
-1.64486	0.00331828		-1.64893	0.00309549		-1.64385	0.00104626		-1.64759	0.0012607		-1.64966	0.000926379		-1.64656	0.000868105		-1.64784	0.000376389		-1.6472	0.00126791		-1.64617	0.00246481		-1.64446	0.00121706		-1.64299	0.000601268		-1.64554	0.00123888		-1.64404	0.000914412		-1.64444	0.00179454		-1.64797	0.000384034		-1.64637	0.000976294
-1.63986	0.00239009		-1.64455	0.00305296		-1.63635	0.000283457		-1.64384	0.00124335		-1.64529	0.000469699		-1.63843	0.00175979		-1.64346	0.000951193		-1.64126	0.00104211		-1.63867	0.00140563		-1.63727	0.000808847		-1.63549	0.000980877		-1.64085	0.00109231		-1.63935	0.000982929		-1.63975	0.0015599		-1.64422	0.000450962		-1.63824	0.000500568
-1.63236	0.00258628		-1.63862	0.0025736		-1.63198	0.000898721		-1.63822	0.00156003		-1.6381	0.000510223		-1.63312	0.00147102		-1.63815	0.000907835		-1.63688	0.000836414		-1.63367	0.00111378		-1.63352	0.00108649		-1.63018	0.0013128		-1.63617	0.00086045		-1.63435	0.000912086		-1.63506	0.00150869		-1.63953	0.000687669		-1.63231	0.000738779
-1.62486	0.00267997		-1.6308	0.00302537		-1.62792	0.0010695		-1.63041	0.00151053		-1.62997	0.00110485		-1.62968	0.000843405		-1.63065	0.00104741		-1.63094	0.00104303		-1.6293	0.00109785		-1.62883	0.000804717		-1.6258	0.00046537		-1.62898	0.000790251		-1.62685	0.000926889		-1.62756	0.000978058		-1.63203	0.000651532		-1.62824	0.00080402
-1.61986	0.00287674		-1.62424	0.00334655		-1.62104	0.000685609		-1.62415	0.00140042		-1.62529	0.00121341		-1.62343	0.000802537		-1.62346	0.000965645		-1.62313	0.000682952		-1.62274	0.00137182		-1.62165	0.00126249		-1.61924	0.000622566		-1.62117	0.00059406		-1.61935	0.000626173		-1.61975	0.000681175		-1.62515	0.000626086		-1.62199	0.000803092
-1.61548	0.00259799		-1.61987	0.00240117		-1.61354	0.0011137		-1.61978	0.00158941		-1.62154	0.000851001		-1.61593	0.0011333		-1.61878	0.000632201		-1.61657	0.000904825		-1.61461	0.00139728		-1.61446	0.0017003		-1.61112	0.000793146		-1.61616	0.00107905		-1.61435	0.000409201		-1.61475	0.00156498		-1.62047	0.000531361		-1.61387	0.000661929
-1.6083	0.00325397		-1.61455	0.00246186		-1.60823	0.00122409		-1.61447	0.00140065		-1.61497	0.000902653		-1.60999	0.000952536		-1.61409	0.000710246		-1.6122	0.00114796		-1.60867	0.000922968		-1.60946	0.000751482		-1.60486	0.00127378		-1.61179	0.000854047		-1.60998	0.000351046		-1.61037	0.00129679		-1.61578	0.000686386		-1.60793	0.00108588
-1.60048	0.00311959		-1.60643	0.00274212		-1.60385	0.000936902		-1.60697	0.00136456		-1.60747	0.00117204		-1.60562	0.000410251		-1.60628	0.000885743		-1.60688	0.00108325		-1.60461	0.0015842		-1.60477	0.000332488		-1.6008	0.00124381		-1.60492	0.000423937		-1.6031	0.000925409		-1.60381	0.0012372		-1.60859	0.00109095		-1.60418	0.00127185
-1.59548	0.0025667		-1.59955	0.00374383		-1.59729	0.000678346		-1.59978	0.00164516		-1.60185	0.00186368		-1.6	0.000829034		-1.59878	0.00112772		-1.59938	0.000816076		-1.59836	0.00132791		-1.5979	0.00148598		-1.59518	0.00102423		-1.59679	0.000961289		-1.59529	0.000999636		-1.59569	0.00208237		-1.60078	0.00175659		-1.59887	0.000853241
-1.59142	0.00247072		-1.59518	0.00266418		-1.58948	0.000415433		-1.59509	0.00158524		-1.59747	0.00172804		-1.59218	0.00106773		-1.5944	0.0010726		-1.5922	0.00137469		-1.59024	0.000913253		-1.5904	0.00161448		-1.58705	0.00176007		-1.59148	0.000936594		-1.58998	0.000778434		-1.59006	0.00115597		-1.59547	0.00156586		-1.59137	0.000694202
-1.58423	0.00228738		-1.59018	0.00329459		-1.58354	0.000848711		-1.59041	0.00105691		-1.59154	0.00191869		-1.585	0.000895051		-1.59034	0.000428212		-1.58782	0.00105135		-1.58399	0.00075392		-1.58477	0.00127236		-1.58049	0.00138216		-1.5871	0.00072554		-1.58592	0.000839762		-1.586	0.00143696		-1.59109	0.00122309		-1.58481	0.00104386
-1.57611	0.003416		-1.58205	0.00322769		-1.57948	0.00129818		-1.58259	0.00116401		-1.58372	0.0006572		-1.58062	0.000274848		-1.58315	0.00134926		-1.58282	0.00129056		-1.57992	0.00118529		-1.58071	0.000937345		-1.57612	0.00105702		-1.58023	0.000354653		-1.57873	0.000762362		-1.57912	0.00147051		-1.58453	0.000943193		-1.58011	0.000740869
-1.57111	0.00397925		-1.57486	0.00233725		-1.57354	0.000796004		-1.57509	0.00145362		-1.57716	0.000522191		-1.57562	0.00024139		-1.57597	0.000958832		-1.57501	0.0017833		-1.57399	0.000685523		-1.57415	0.000757677		-1.57049	0.000563571		-1.5721	0.000772644		-1.5706	0.000842511		-1.571	0.00111579		-1.57672	0.00120385		-1.57512	0.000477583
-1.56767	0.00411824		-1.5708	0.00237243		-1.56542	0.00102053		-1.57041	0.00125469		-1.5731	0.000244193		-1.56781	0.000966233		-1.57096	0.000617749		-1.56751	0.00106869		-1.56586	0.00121074		-1.56602	0.000573421		-1.56268	0.000772978		-1.56679	0.00082798		-1.5656	0.00115528		-1.56569	0.000971215		-1.57078	0.000862793		-1.5673	0.000880174
-1.56111	0.00376751		-1.56643	0.00226736		-1.55916	0.00132349		-1.56603	0.000940089		-1.56747	0.000730059		-1.56062	0.000988239		-1.56659	0.000630756		-1.56345	0.000588656		-1.55961	0.000911699		-1.56008	0.000893977		-1.55611	0.00134635		-1.56335	0.000934307		-1.56185	0.000989908		-1.56225	0.000822664		-1.56672	0.00113949		-1.55981	0.00095029
-1.5533	0.0029831		-1.55924	0.00246876		-1.5551	0.0015254		-1.55853	0.00122022		-1.55966	0.000538568		-1.55624	0.000855306		-1.55971	0.000831855		-1.55938	0.00042803		-1.55586	0.000818236		-1.55602	0.000896042		-1.55205	0.00139404		-1.55742	0.00102531		-1.5556	0.000911663		-1.556	0.00134977		-1.56047	0.0013454		-1.55511	0.000444846
-1.54767	0.0035308		-1.55237	0.00291087		-1.54916	0.00058642		-1.55072	0.0017326		-1.55279	0.000655311		-1.55124	0.000660847		-1.5519	0.0010982		-1.55219	0.000715771		-1.55086	0.00105588		-1.54977	0.000667041		-1.54705	0.00105947		-1.54992	0.00159171		-1.54779	0.000834898		-1.5485	0.00122991		-1.55203	0.000774055		-1.55043	0.00100787
-1.5433	0.00302802		-1.54736	0.00335345		-1.54104	0.000604058		-1.54634	0.00138561		-1.54841	0.000878297		-1.54374	0.000942431		-1.54596	0.000584095		-1.54501	0.000875704		-1.54336	0.000900429		-1.54133	0.00147681		-1.53955	0.0014274		-1.54398	0.00102577		-1.54216	0.00169496		-1.54256	0.00137846		-1.54641	0.000586956		-1.54293	0.000731814
-1.53736	0.0027581		-1.54268	0.00358864		-1.53448	0.000386796		-1.54259	0.00145247		-1.5431	0.000837143		-1.53624	0.000703062		-1.5419	0.000748649		-1.5397	0.00115328		-1.53649	0.0010551		-1.53571	0.00142816		-1.53268	0.000839136		-1.5396	0.00111929		-1.53779	0.00174064		-1.53818	0.00176894		-1.54266	0.000780042		-1.53543	0.00109958
-1.52955	0.00403685		-1.5358	0.00306422		-1.53104	0.00100704		-1.53572	0.00128152		-1.53497	0.0013291		-1.53187	0.00044034		-1.53565	0.000869432		-1.53532	0.00104719		-1.53211	0.00137765		-1.53227	0.00110301		-1.52799	0.000775239		-1.53367	0.00149635		-1.53185	0.00105441		-1.53256	0.000890648		-1.53703	0.00123571		-1.53043	0.00102876
-1.52298	0.00444575		-1.52799	0.0021301		-1.52604	0.000519602		-1.52822	0.00114458		-1.5281	0.000880396		-1.52781	0.00120403		-1.52753	0.000863031		-1.52844	0.000625173		-1.52711	0.00126903		-1.52665	0.000901549		-1.5233	0.000835743		-1.52585	0.00112318		-1.52404	0.00112546		-1.52475	0.00102463		-1.52922	0.00100713		-1.52605	0.000839311
-1.51861	0.00333556		-1.52237	0.00200388		-1.51823	4.04643e-05		-1.52291	0.00104441		-1.52404	0.000845542		-1.52062	0.00102933		-1.52128	0.000628691		-1.52063	0.000946888		-1.51961	0.00109454		-1.51883	0.00122807		-1.51611	0.000988982		-1.51898	0		-1.51748	0.000580072		-1.51756	0.000794851		-1.52297	0.000221311		-1.51855	0.000678646
-1.5133	0.00345689		-1.5183	0.00203975		-1.51166	0.000307943		-1.51853	0.000398104		-1.51966	0.000862339		-1.51343	0.001105		-1.51722	0.000626214		-1.5147	0.000772395		-1.51211	0.00120122		-1.51259	0.000917382		-1.5083	0.000805397		-1.5146	0.000226145		-1.5131	0.000935771		-1.51318	0.000987108		-1.51859	0.000405203		-1.51074	0.0011755
-1.50548	0.00303992		-1.51205	0.00214022		-1.50698	0.000482043		-1.51197	0.000770068		-1.51216	0.00052807		-1.50843	0.00108524		-1.51128	0.000777348		-1.51063	0.000673477		-1.50711	0.00111048		-1.50821	0.00072693		-1.50299	0.00101179		-1.5096	0.000624929		-1.50779	0.000996041		-1.50819	0.00153452		-1.51328	0.000343834		-1.50606	0.000973508
-1.49861	0.0027437		-1.50393	0.00248784		-1.50198	0.000593683		-1.50416	0.00198011		-1.50529	0.000745177		-1.50375	0.000571252		-1.50315	0.000840526		-1.50438	0.000358694		-1.50242	0.00105626		-1.5029	0.00100366		-1.49861	0.000937714		-1.50179	0.000686896		-1.49998	0.00103305		-1.50037	0.00104273		-1.50547	0.000783891		-1.5023	0.000810289
-1.49423	0.00408829		-1.49799	0.00273086		-1.49448	0.000502171		-1.4979	0.00161624		-1.50029	0.00124133		-1.49718	0.000514441		-1.4969	0.00108767		-1.49657	0.000658454		-1.49555	0.00162365		-1.4954	0.00158993		-1.49205	0.000657436		-1.4946	0.000454806		-1.49279	0.000756653		-1.49319	0.00121424		-1.49828	0.000595082		-1.49574	0.000744351
-1.48892	0.00365098		-1.49362	0.00270396		-1.48698	0.00133428		-1.49384	0.00100625		-1.4956	0.00165077		-1.48937	0.00071182		-1.49346	0.00112793		-1.49032	0.000436119		-1.48742	0.00166095		-1.48821	0.00163835		-1.48393	0.00113298		-1.48992	0.00071182		-1.48842	0.00124072		-1.4885	0.00142327		-1.49391	0.000660513		-1.48824	0.000675628
-1.48111	0.00293798		-1.48737	0.00289478		-1.48229	0.00129195		-1.48791	0.000930142		-1.48872	0.00039831		-1.48343	0.00095029		-1.48815	0.000646448		-1.48626	0.00034945		-1.48211	0.00168136		-1.48352	0.00130104		-1.47861	0.000817272		-1.48523	0.000934765		-1.48341	0.00144944		-1.48381	0.00130275		-1.48922	0.00124832		-1.48262	0.000603886
-1.47392	0.00345209		-1.47924	0.00358474		-1.4776	0.000895608		-1.48009	0.000888273		-1.48091	0.000912521		-1.47937	0.000769753		-1.48065	0.000489326		-1.48032	0.00100097		-1.47805	0.00144488		-1.47852	0.00114088		-1.47424	0.000977107		-1.47742	0.00109163		-1.4756	0.00126546		-1.476	0.00066153		-1.48172	0.00113927		-1.47824	0.00117503
-1.46986	0.00371433		-1.4733	0.00268142		-1.47073	0.000918849		-1.47322	0.000734213		-1.47529	0.000770583		-1.47312	0.000624919		-1.47409	0.0010982		-1.47188	0.00112346		-1.47086	0.000413878		-1.47102	0.00140751		-1.46767	0.00109774		-1.46992	0.000807401		-1.46842	0.00147207		-1.4685	0.00109814		-1.47422	0.000585032		-1.47199	0.000789857
-1.46548	0.00376693		-1.46987	0.00321895		-1.46292	0.000619621		-1.46916	0.00132663		-1.47122	0.000716411		-1.46499	0.000510175		-1.4694	0.00145497		-1.46594	0.00127484		-1.46305	0.000583899		-1.46352	0.00103647		-1.45955	0.000994071		-1.46586	0.000911212		-1.46435	0.000943384		-1.46444	0.00145462		-1.46922	0.0011181		-1.46387	0.000303684
-1.4583	0.00298598		-1.46424	0.00282926		-1.4576	0.000490343		-1.46353	0.000944715		-1.46497	0.0010259		-1.45874	0.00118292		-1.4644	0.000784161		-1.46219	0.00112231		-1.45805	0.000811046		-1.45883	0.000932067		-1.45424	0.0009543		-1.46179	0.000892005		-1.45998	0.000862813		-1.46006	0.00151487		-1.46484	0.000959443		-1.45762	0.000764086
-1.45111	0.00348933		-1.45674	0.00407306		-1.45354	0.00076218		-1.4554	0.000729124		-1.45685	0.000774992		-1.45468	0.00108053		-1.4569	0.000484784		-1.45688	0.000399602		-1.4543	0.000956584		-1.45414	0.00125193		-1.45049	0.000683447		-1.4546	0.000838727		-1.45279	0.000810155		-1.45319	0.00152591		-1.45734	0.0013918		-1.45355	0.000850919
-1.44642	0.00310116		-1.45018	0.00337391		-1.44635	0.000861161		-1.44884	0.00132593		-1.45091	0.000881656		-1.44875	0.000829483		-1.4494	0.000799439		-1.44938	0.000412083		-1.44805	0.00200352		-1.44696	0.00126134		-1.44455	0.00084366		-1.4471	0.000613496		-1.4456	0.00123268		-1.446	0.00158043		-1.44953	0.00084248		-1.44793	0.00107218
-1.44173	0.00342003		-1.4458	0.00258164		-1.43823	0.000601568		-1.44509	0.00119732		-1.44685	0.000629694		-1.44062	0.000997446		-1.44471	0.000963374		-1.44282	0.00119049		-1.44055	0.00149735		-1.43914	0.000826056		-1.43705	0.000663656		-1.44211	0.000496879		-1.4406	0.000983564		-1.44069	0.00169212		-1.44484	0.00110335		-1.4398	0.000674931
-1.43486	0.00268822		-1.44049	0.00250118		-1.43323	0.00119463		-1.4404	0.000820496		-1.4406	0.000294585		-1.43437	0.00056721		-1.44003	0.000583888		-1.43813	0.000992419		-1.43461	0.000590894		-1.43446	0.000324457		-1.43111	0.000749606		-1.43773	0.000542612		-1.43623	0.00080212		-1.43631	0.00146168		-1.44109	0.000892515		-1.43293	0.000625246
-1.42705	0.00355249		-1.43299	0.00338035		-1.42948	0.000944165		-1.43291	0.00112121		-1.43216	0.000839872		-1.43062	0.000852612		-1.43284	0.000617336		-1.43313	0.00117569		-1.43024	0.00118295		-1.43039	0.00053556		-1.42674	0.00159798		-1.43117	0.00143599		-1.42935	0.00015501		-1.42975	0.00148508		-1.43422	0.000761439		-1.42887	0.00101135
-1.42142	0.0038297		-1.4258	0.00357761		-1.42323	0.00075803		-1.42603	0.00146426		-1.42622	0.00065972		-1.42562	0.00116092		-1.42503	0.00046517		-1.42595	0.00102963		-1.4243	0.00109241		-1.42383	0.000822385		-1.42111	0.00141986		-1.42335	0.000640936		-1.42123	0.000455726		-1.42162	0.00115619		-1.42672	0.000720384		-1.42355	0.00135938
-1.41736	0.00356555		-1.42112	0.00384384		-1.41573	0.000696814		-1.42166	0.00221212		-1.42279	0.000942757		-1.41812	0.000661745		-1.42003	0.000645622		-1.41845	0.000606452		-1.41649	0.000857875		-1.41633	0.00142701		-1.4133	0.000724914		-1.41742	0.000483846		-1.4156	0.00106477		-1.41569	0.000961062		-1.42141	0.000693014		-1.41543	0.00115228
-1.4108	0.00245593		-1.41643	0.00399397		-1.40979	0.000846013		-1.41665	0.00147745		-1.41747	0.00106391		-1.41156	0.000138547		-1.41565	0.0010439		-1.41345	0.00139271		-1.40992	0.00111708		-1.41102	0.00123495		-1.40611	0.00056244		-1.41335	0.000870282		-1.41154	0.00090257		-1.41162	0.00118819		-1.41703	0.00105524		-1.40855	0.000864386
-1.40298	0.00312228		-1.40924	0.00359899		-1.40573	0.0008954		-1.40947	0.000756651		-1.40966	0.00124763		-1.40687	0.000638841		-1.40847	0.00055106		-1.40907	0.00093071		-1.40555	0.000792004		-1.40664	0.000690216		-1.40174	0.000378667		-1.4071	0.000733543		-1.40529	0.000612428		-1.40568	0.00100742		-1.41047	0.000901924		-1.40481	0.00137238
-1.39705	0.00389901		-1.40143	0.00275224		-1.39979	0.00101181		-1.40166	0.000431876		-1.40341	0.00104417		-1.40187	0.000924242		-1.40065	0.000654706		-1.40188	0.000797124		-1.40024	0.00133043		-1.40039	0.00107754		-1.39674	0.00101235		-1.39898	0.000522032		-1.39716	0.000444306		-1.39756	0.00153033		-1.40265	0.000729793		-1.40043	0.00150565
-1.39298	0.00363024		-1.39643	0.00319596		-1.39198	0.00144053		-1.39665	0.00100856		-1.39904	0.000891315		-1.39437	0.000874393		-1.39565	0.000737912		-1.39407	0.00126606		-1.39242	0.00145266		-1.39227	0.00160714		-1.38924	0.00100576		-1.39273	0.000934078		-1.39123	0.000498866		-1.391	0.00136235		-1.39641	0.00119294		-1.39293	0.0011091
-1.38673	0.0029088		-1.39205	0.00272695		-1.3851	0.00149552		-1.39228	0.00098751		-1.39372	0.00151198		-1.38687	0.000914138		-1.3919	0.00109799		-1.38907	0.000778404		-1.38524	0.00146703		-1.38602	0.00111908		-1.38174	0.00114637		-1.38867	0.00106121		-1.38685	0.000828131		-1.38694	0.000582508		-1.39234	0.000812544		-1.38574	0.000531215
-1.37861	0.00293798		-1.38487	0.0028373		-1.38104	0.00101244		-1.3854	0.000884341		-1.38591	0.000943387		-1.38187	0.00102686		-1.38565	0.000986086		-1.38469	0.000799204		-1.38086	0.00135822		-1.38195	0.00115923		-1.37705	0.000655551		-1.38273	0.000632247		-1.3806	0.000838281		-1.381	0.000851579		-1.38672	0.000390021		-1.38106	0.00100067
-1.37267	0.00379381		-1.37674	0.00311503		-1.37573	0.000593268		-1.37759	0.0007932		-1.37872	0.000556416		-1.3775	0.00103517		-1.37784	0.000883059		-1.37751	0.000751825		-1.37586	0.000981456		-1.37633	0.00114156		-1.37236	0.00099916		-1.3746	0.00068461		-1.37248	0.000811424		-1.37287	0.00113632		-1.3789	0.000820456		-1.37636	0.000461795
-1.36923	0.00354635		-1.37205	0.00223931		-1.36791	0.000727733		-1.37197	0.000851262		-1.37404	0.000963334		-1.37062	0.000591461		-1.37221	0.00126585		-1.3697	0.000728714		-1.36805	0.00117149		-1.36852	0.000628721		-1.36455	0.00135766		-1.36804	0.00105413		-1.36654	0.00100069		-1.36662	0.00144225		-1.37203	0.00067377		-1.36918	0.000845812
-1.36361	0.00392588		-1.3683	0.00257291		-1.36073	0.000948108		-1.36791	0.000603748		-1.36966	0.00165707		-1.36281	0.000678362		-1.36784	0.000927036		-1.36469	0.000894656		-1.36055	0.00129954		-1.36165	0.000823303		-1.35705	0.00119123		-1.36461	0.000791852		-1.36279	0.00113942		-1.36288	0.000938547		-1.36797	0.000849964		-1.36136	0.00142485
-1.35611	0.0038967		-1.36174	0.00366084		-1.35635	0.000875065		-1.36103	0.00158247		-1.36216	0.00161402		-1.3575	0.000608078		-1.3619	0.000176529		-1.36126	0.000609457		-1.35649	0.00129818		-1.35758	0.00147703		-1.35268	0.00112827		-1.3596	0.00101754		-1.35748	0.000657894		-1.35787	0.000630628		-1.36234	0.000937633		-1.35605	0.00184254
-1.34955	0.00360241		-1.35424	0.00299686		-1.35135	0.000910549		-1.35291	0.00208305		-1.35435	0.000877667		-1.35343	0.00031841		-1.35409	0.000617336		-1.3547	0.00061431		-1.35242	0.00112408		-1.35227	0.00143275		-1.34861	0.00109152		-1.35179	0.00105458		-1.34966	0.000594664		-1.35037	0.00108335		-1.35422	0.00107405		-1.35168	0.000692112
-1.34517	0.00359185		-1.34893	0.00295456		-1.34354	0.000418545		-1.34759	0.00141846		-1.34935	0.000896984		-1.34625	0.00122312		-1.34753	0.00108168		-1.3472	0.000398447		-1.34524	0.00127583		-1.34414	0.000980712		-1.34174	0.000655928		-1.34523	0.000646424		-1.3431	0.000740369		-1.34381	0.00153187		-1.34765	0.00102958		-1.34511	0.000986277
-1.33986	0.00295737		-1.34455	0.00389695		-1.33635	0.000734789		-1.34416	0.00148601		-1.34497	0.000894884		-1.33843	0.00126174		-1.34347	0.00129434		-1.34157	0.000341361		-1.33774	0.0013454		-1.33727	0.000909809		-1.33455	0.00113223		-1.34086	0.00115679		-1.33841	0.000579226		-1.33913	0.00171419		-1.3439	0.000853385		-1.3373	0.00090966
-1.33236	0.00250585		-1.3383	0.00436275		-1.33229	0.00082962		-1.33822	0.00120958		-1.33779	0.000751056		-1.33343	0.00116631		-1.33815	0.000775902		-1.33719	0.000249607		-1.33305	0.000864676		-1.33352	0.00111908		-1.32924	0.00105137		-1.33585	0.00069307		-1.33341	0.000561885		-1.33412	0.00188372		-1.33891	0.000917319		-1.33137	0.000823058
-1.32517	0.00231579		-1.33018	0.00322585		-1.32791	0.00131166		-1.3304	0.000879714		-1.32997	0.00102884		-1.32968	0.00106795		-1.33003	0.000350374		-1.33126	0.000928168		-1.32867	0.00116469		-1.32883	0.000767085		-1.32486	0.00101782		-1.32835	0.00109071		-1.3256	0.000757498		-1.32693	0.00125883		-1.33141	0.00081062		-1.32731	0.00109842
-1.32048	0.00305912		-1.32393	0.00285524		-1.32073	0.00102572		-1.32447	0.00122993		-1.32529	0.001407		-1.32343	0.000271479		-1.32315	0.000391668		-1.32313	0.000911527		-1.3218	0.00156341		-1.32133	0.000669565		-1.3183	0.0012834		-1.32085	0.001393		-1.31841	0.000814385		-1.31912	0.00117208		-1.32453	0.00104262		-1.32074	0.00103085
-1.3158	0.00402513		-1.31955	0.00309825		-1.31354	0.00137703		-1.32009	0.00121328		-1.32122	0.00113278		-1.31562	0.000284952		-1.31878	0.000778999		-1.31688	0.000696588		-1.31367	0.0010654		-1.31414	0.00061197		-1.31018	0.00088098		-1.31586	0.000913728		-1.31373	0.000856257		-1.31412	0.00116877		-1.31984	0.000967783		-1.31261	0.00117202
-1.3083	0.00413994		-1.31424	0.00338104		-1.30854	0.00153515		-1.31447	0.00134976		-1.31466	0.0015439		-1.30999	0.000520279		-1.31346	0.000828964		-1.31251	0.00102431		-1.30774	0.00104985		-1.30977	0.000861623		-1.30424	0.000639342		-1.31148	0.000949856		-1.30904	0.000848009		-1.30974	0.00144468		-1.31516	0.000738346		-1.30699	0.000609458
-1.3008	0.00364215		-1.30612	0.00353094		-1.30416	0.00112532		-1.30665	0.000776545		-1.30747	0.0011523		-1.30562	0.000322003		-1.30565	0.00108663		-1.3072	0.00122076		-1.30367	0.00143944		-1.30508	0.00142609		-1.30018	0.000955808		-1.30429	0.000757324		-1.30154	0.00052086		-1.30256	0.00130893		-1.30797	0.000772986		-1.30324	0.000395393
-1.2958	0.00363658		-1.29924	0.00340127		-1.29729	0.00082962		-1.29947	0.00166274		-1.30216	0.000899084		-1.3	0.000733601		-1.29847	0.000938598		-1.29938	0.00053365		-1.29742	0.00122609		-1.29789	0.001497		-1.29424	0.00107041		-1.29648	0.000993759		-1.29373	6.70372e-05		-1.29475	0.00155814		-1.30016	0.000755024		-1.29761	0.000941003
-1.29142	0.00287444		-1.29518	0.00285225		-1.28948	0.00113798		-1.29509	0.00134097		-1.29779	0.00052555		-1.29218	0.000999691		-1.2944	0.000828964		-1.29251	0.000786724		-1.2893	0.000938513		-1.29008	0.00114937		-1.28611	0.00118331		-1.29117	0.000938195		-1.28873	0.000553638		-1.28944	0.001612		-1.29516	0.000968852		-1.29011	0.00115089
-1.28392	0.00335802		-1.28955	0.00292237		-1.28354	0.00120065		-1.29041	0.00134652		-1.29154	0.000994199		-1.28531	0.000683526		-1.29003	0.000985879		-1.28813	0.000712304		-1.28336	0.00114176		-1.28477	0.00165418		-1.27955	0.00081991		-1.28679	0.000877599		-1.28466	0.00117326		-1.28506	0.00152746		-1.29078	0.00068382		-1.28387	0.000817951
-1.27611	0.00272143		-1.28143	0.00411238		-1.27979	0.000924659		-1.28259	0.000469582		-1.28341	0.000837353		-1.28093	0.000566087		-1.28284	0.00118244		-1.28282	0.00075067		-1.2793	0.00133199		-1.2807	0.00118057		-1.27549	0.000879095		-1.27991	0.00156427		-1.27748	0.00100915		-1.27818	0.000928173		-1.28391	9.90021e-05		-1.27949	0.000924751
-1.27142	0.00331272		-1.27455	0.00366612		-1.27354	0.000853484		-1.27509	0.00128846		-1.27716	0.000497415		-1.27562	0.00114969		-1.27565	0.00164884		-1.27501	0.0012129		-1.27336	0.00139533		-1.27414	0.00106355		-1.26986	0.00092075		-1.27179	0.00165642		-1.26935	0.000266457		-1.27037	0.000843633		-1.27578	0.000191589		-1.27386	0.00131109
-1.26767	0.00345401		-1.2708	0.00303181		-1.2651	0.000161649		-1.27072	0.00206662		-1.2731	0.000832104		-1.26781	0.000916383		-1.27065	0.00122497		-1.26782	0.00131205		-1.26492	0.000997389		-1.26602	0.00153142		-1.26174	0.000834235		-1.26679	0.00106144		-1.26466	0.000700401		-1.26506	0.00153629		-1.27047	0.000524091		-1.26636	0.000726938
-1.26111	0.00308388		-1.26611	0.00307894		-1.25916	0.00147539		-1.26603	0.00183993		-1.26747	0.00104249		-1.26093	0.00060471		-1.26596	0.00130487		-1.26376	0.000944808		-1.25899	0.0012292		-1.2604	0.00109384		-1.25518	0.000887953		-1.26336	0.000889261		-1.26091	0.000881634		-1.26163	0.0016685		-1.2664	0.000226657		-1.25918	0.000947504
-1.25361	0.0033515		-1.25862	0.00300697		-1.25541	0.00107054		-1.25822	0.0017009		-1.25935	0.00137991		-1.25656	0.00105673		-1.25909	0.000848166		-1.25907	0.00115582		-1.25524	0.0014717		-1.25633	0.00186092		-1.25143	0.000953358		-1.2571	0.00114376		-1.25435	0.000918641		-1.25537	0.00071296		-1.25953	0.000734069		-1.25449	0.00106406
-1.24798	0.00297599		-1.25174	0.00319458		-1.24917	0.000928394		-1.25072	0.00163405		-1.25247	0.000515472		-1.25124	0.000966682		-1.25128	0.000535781		-1.2522	0.000948506		-1.24992	0.00108308		-1.24977	0.001497		-1.24643	0.000864581		-1.24929	0.00115611		-1.24685	0.000744176		-1.24787	0.000299311		-1.25141	0.000532644		-1.2498	0.000873905
-1.24361	0.00265252		-1.24705	0.00370268		-1.24073	0.00125149		-1.24634	0.00152834		-1.24841	0.000208708		-1.24343	0.00109333		-1.24565	0.000457943		-1.24501	0.000644818		-1.24242	0.00160363		-1.24133	0.000938951		-1.23893	0.00108926		-1.24367	0.00058377		-1.24123	0.00129824		-1.24193	0.000413208		-1.24578	0.000760584		-1.2423	0.000754103
-1.23767	0.00324341		-1.24236	0.00310538		-1.23479	0.00135358		-1.24228	0.00126949		-1.2431	0.000277368		-1.23624	0.000589216		-1.24159	0.000456911		-1.24001	0.0010673		-1.23586	0.00129701		-1.23571	0		-1.23205	0.00132694		-1.23929	0.00111038		-1.23685	0.00109078		-1.23788	0.000622682		-1.24234	0.000530933		-1.23449	0.00103968
-1.22955	0.0037796		-1.23549	0.00373142		-1.23104	0.00131395		-1.23541	0.00161532		-1.23497	0.000784441		-1.23218	0.000796923		-1.23534	0.00123674		-1.23532	0.000564389		-1.23149	0.00140155		-1.23227	0.00103808		-1.22736	0.00131902		-1.23335	0.00106396		-1.23092	0.00132805		-1.23193	0.00052865		-1.23609	0.000273058		-1.2298	0.0011885
-1.2233	0.00378209		-1.22768	0.00410778		-1.22573	0.000496154		-1.22791	0.00198288		-1.2281	0.000995459		-1.22781	0.00077604		-1.22721	0.000904118		-1.22844	0.000987796		-1.22649	0.00144993		-1.22633	0.00152384		-1.22268	0.000895116		-1.22554	0.00136922		-1.22279	0.00144754		-1.22381	0.00133917		-1.22859	0.000536279		-1.22543	0.00102459
-1.21892	0.00343731		-1.22236	0.00363968		-1.21823	0.000568366		-1.22291	0.00155818		-1.22404	0.000483557		-1.22062	0.000766609		-1.22128	2.35372e-05		-1.22063	0.000705371		-1.21867	0.00109241		-1.21883	0.000810453		-1.21518	0.0007415		-1.21898	0.00154209		-1.21654	0.000707591		-1.21725	0.00124867		-1.22234	0.000536707		-1.21762	0.0015435
-1.2133	0.00357419		-1.21799	0.00364428		-1.21166	0.000988364		-1.21853	0.00168286		-1.21966	0.00136479		-1.21375	0.000381957		-1.21721	0.000602883		-1.21501	0.000698899		-1.21117	0.00172838		-1.21258	0.000555752		-1.20768	0.00125022		-1.21461	0.00148675		-1.21216	0.00078351		-1.21287	0.00156653		-1.21797	0.000545474		-1.20981	0.00110492
-1.20548	0.00390381		-1.21143	0.00336724		-1.20729	0.000448012		-1.21197	0.00148277		-1.21216	0.000770163		-1.20874	0.000651865		-1.21097	0.000837843		-1.21095	0.000926319		-1.20649	0.00113632		-1.20821	0.00111173		-1.20268	0.000621059		-1.20929	0.00101434		-1.20685	0.00160234		-1.20756	0.00153607		-1.21234	0.000792017		-1.20543	0.00132177
-1.19861	0.00294604		-1.2033	0.00279592		-1.20198	0.000510679		-1.20384	0.00117511		-1.20497	0.000794099		-1.20406	0.000756954		-1.20253	0.000783542		-1.20438	0.00117616		-1.2018	0.00102323		-1.20258	0.000910727		-1.1983	0.000364342		-1.20148	0.000470126		-1.19904	0.00103263		-1.19974	0.00107584		-1.20453	0.000767854		-1.20168	0.00169511
-1.19455	0.00337568		-1.19768	0.00284627		-1.19448	0.000635599		-1.1979	0.00116169		-1.20029	0.000269599		-1.19718	0.00084363		-1.19659	0.00102759		-1.19657	0.00102015		-1.19461	0.000754891		-1.19508	0.0011496		-1.19111	0.000617289		-1.19429	0.00124803		-1.19217	0.00056252		-1.19256	0.00086085		-1.19766	0.000318817		-1.19481	0.00124329
-1.18923	0.00374888		-1.19362	0.00295708		-1.18698	0.00127597		-1.19384	0.00083877		-1.1956	0.000607228		-1.18937	0.000803885		-1.19315	0.00166144		-1.19063	0.00169178		-1.1868	0.000384732		-1.18789	0.000735879		-1.1833	0.000946384		-1.18992	0.00154895		-1.18779	0.000564212		-1.18819	0.00124448		-1.19328	0.000732573		-1.1873	0.00145295
-1.18111	0.00340525		-1.18674	0.00351162		-1.18229	0.00114711		-1.18791	0.000498497		-1.18841	0.000768273		-1.18374	0.00025374		-1.18753	0.00105154		-1.18657	0.000944346		-1.1818	0.00108502		-1.18352	0.00075653		-1.17799	0.000839701		-1.18492	0.00120184		-1.18248	0.000512189		-1.18319	0.00150538		-1.18828	0.000264504		-1.18199	0.00148963
-1.17392	0.00256766		-1.17862	0.00318263		-1.1776	0.000863029		-1.18009	0.00143049		-1.18091	0.000455631		-1.17937	0.000713391		-1.18003	0.00125511		-1.18032	0.000912452		-1.17742	0.00153174		-1.17852	0.00135198		-1.17362	0.000985212		-1.17711	0.000430111		-1.17435	0.000585359		-1.17538	0.00138001		-1.18047	0.000211689		-1.17762	0.00201969
-1.17017	0.00294624		-1.1733	0.00265177		-1.17041	0.00029902		-1.17353	0.00183576		-1.1756	0.000411118		-1.17312	0.00121818		-1.17378	0.00171223		-1.17188	0.000983174		-1.17024	0.00163123		-1.17102	0.0014043		-1.16674	0.000916603		-1.16961	0.000619213		-1.16748	0.000751577		-1.16788	0.00167027		-1.17297	0.000870705		-1.17137	0.00184114
-1.1658	0.00301976		-1.16955	0.00250646		-1.1626	9.83592e-05		-1.16916	0.00176706		-1.17122	0.000868638		-1.16531	0.000730682		-1.1694	0.000687328		-1.16594	0.000342978		-1.16242	0.000780734		-1.16352	0.00125721		-1.15861	0.000693437		-1.16554	0.000812431		-1.16341	0.000729584		-1.16381	0.00181397		-1.16828	0.000712687		-1.16324	0.00103782
-1.1583	0.00339661		-1.16393	0.00216781		-1.1576	0.000505906		-1.16353	0.0015103		-1.16466	0.000801028		-1.15906	0.000867881		-1.16409	0.000741835		-1.16251	4.96903e-05		-1.15742	0.00110134		-1.15883	0.000936197		-1.15361	0.000588639		-1.16148	0.000935679		-1.15904	0.00102374		-1.15975	0.0011361		-1.16359	0.00113863		-1.15699	0.00102366
-1.15142	0.00297369		-1.15611	0.00331344		-1.15354	0.000634147		-1.1554	0.00116146		-1.15654	0.00112921		-1.155	0.000658601		-1.15659	0.001092		-1.15688	0.000741425		-1.15367	0.00104888		-1.15414	0.0011333		-1.14986	0.000878152		-1.1543	0.00129216		-1.15154	0.00113244		-1.15256	0.00127693		-1.15609	0.000341055		-1.15293	0.00146061
-1.14673	0.00299481		-1.14987	0.004131		-1.14635	0.000753672		-1.14884	0.000685867		-1.15091	0.00122516		-1.14874	0.000722598		-1.14909	0.00118698		-1.14939	0.000818387		-1.14742	0.00123639		-1.14664	0.00145179		-1.14361	0.00107795		-1.14679	0.00121419		-1.14467	0.000836378		-1.14506	0.00136434		-1.14828	0.000283535		-1.14731	0.00127232
-1.14205	0.00325301		-1.14549	0.00278626		-1.13823	0.000603021		-1.14541	0.00139625		-1.14685	0.000817616		-1.14062	0.000893479		-1.1444	0.000712723		-1.14282	0.00160604		-1.13961	0.00190093		-1.13883	0.00107502		-1.13611	0.00110094		-1.14179	0.000744976		-1.13966	0.000512824		-1.14006	0.00130673		-1.14391	0.000325018		-1.13918	0.000913142
-1.13517	0.00269187		-1.14018	0.00322953		-1.13323	0.000703455		-1.14041	0.00151885		-1.1406	0.0011101		-1.13468	0.000686895		-1.13971	0.000493249		-1.13844	0.00140635		-1.1343	0.00150162		-1.13446	0.0013545		-1.13049	0.00112733		-1.13742	0.00124369		-1.13498	0.000508594		-1.13569	0.00102441		-1.13984	0.000163578		-1.13261	0.000638015
-1.12736	0.00244672		-1.13205	0.00218988		-1.12979	0.000496154		-1.13259	0.00101457		-1.13216	0.00141519		-1.13093	0.000956129		-1.13221	0.000381344		-1.13313	0.00081284		-1.12992	0.00166814		-1.13039	0.00229758		-1.12611	0.000787114		-1.13054	0.000952371		-1.12779	0.000963474		-1.12913	0.00158816		-1.13297	0		-1.12855	0.000853473
-1.12173	0.00267344		-1.12518	0.00368153		-1.12323	0.000321224		-1.12603	0.00050081		-1.12654	0.00079242		-1.12562	0.00115463		-1.12472	0.00110109		-1.12563	0.00096376		-1.12367	0.00142195		-1.12352	0.00135381		-1.12018	0.000971452		-1.12273	0.000829581		-1.11998	0.00101782		-1.121	0.00219053		-1.12578	0.000611546		-1.12293	0.000616191
-1.11736	0.00399327		-1.1208	0.0038489		-1.11573	0		-1.12134	0.00108536		-1.1231	0.000663709		-1.11812	0.00146271		-1.11971	0.00108251		-1.11814	0.00060599		-1.11555	0.00114953		-1.11633	0.00151604		-1.11236	0.000773354		-1.1171	0.000751836		-1.11435	0.000839762		-1.11506	0.00140164		-1.12047	0.000330363		-1.11449	0.00105523
-1.1108	0.00387175		-1.11612	0.00310768		-1.1101	0.000411698		-1.11634	0.000814482		-1.11716	0.000627385		-1.11156	0.00105471		-1.11534	0.000419128		-1.11345	0.000522557		-1.1093	0.00128302		-1.11102	0.000564472		-1.1058	0.00104496		-1.11304	0.00104727		-1.11029	0.000817346		-1.11131	0.00111138		-1.11609	0.000612401		-1.10793	0.000744119
-1.10298	0.00293875		-1.1083	0.00284949		-1.10541	0.00058144		-1.10916	0.000832525		-1.10935	0.0009879		-1.10718	0.00131092		-1.10815	0.00127184		-1.10907	0.000681103		-1.10524	0.000940068		-1.10665	0.000531889		-1.10111	0.001028		-1.10679	0.000954429		-1.10373	0.000616446		-1.10506	0.00103677		-1.10953	0.00151882		-1.10418	0.000697452
-1.09705	0.00298751		-1.10049	0.00256417		-1.09948	0.000815924		-1.10134	0.00106963		-1.10341	0.00167177		-1.10218	0.000960844		-1.10003	0.00148863		-1.10157	0.000629795		-1.09961	0.000833586		-1.10008	0.000832481		-1.0958	0.000716432		-1.09836	0.00108797		-1.0956	0.000404549		-1.09694	0.000991964		-1.1014	0.00155709		-1.09949	0.00076873
-1.09298	0.00265885		-1.09612	0.00343392		-1.09166	0.000633109		-1.09634	0.00135485		-1.09904	0.00132238		-1.09468	0.000435849		-1.09534	0.000841972		-1.09407	0.000868771		-1.0918	0.00140505		-1.09227	0.00147726		-1.0883	0.000436343		-1.09241	0.000739031		-1.08967	0.000807195		-1.09068	0.00108909		-1.09547	0.00104668		-1.09199	0.000840471
-1.08642	0.00231925		-1.09143	0.00360014		-1.0851	0.000923829		-1.09228	0.00100324		-1.09341	0.00125183		-1.08718	0.000699245		-1.09159	0.00111678		-1.08907	0.000818618		-1.08492	0.00167786		-1.08633	0.00161265		-1.08111	0.000142683		-1.08835	0.00107127		-1.08592	0.000662124		-1.08662	0.001497		-1.09141	0.000126158		-1.08512	0.00095029
-1.0783	0.00257765		-1.08393	0.00303617		-1.08104	0.00121932		-1.08509	0.000985891		-1.08591	0.00123251		-1.08249	0.000462795		-1.08503	0.000911964		-1.0847	0.000553295		-1.08055	0.0014066		-1.08227	0.00198368		-1.07642	0.000619739		-1.08242	0.000997189		-1.07966	0.00120603		-1.08069	0.00214109		-1.08547	0.000297434		-1.08043	0.00067052
-1.07267	0.00254405		-1.07612	0.00301272		-1.07573	0.00131291		-1.07728	0.0015022		-1.07872	0.00141833		-1.07781	0.000469307		-1.07721	0.000931991		-1.0772	0.000770084		-1.07524	0.00154398		-1.07633	0.00134578		-1.07174	0.000801627		-1.07398	0.000672033		-1.07123	0.000970453		-1.07225	0.00174819		-1.07734	0.000913043		-1.07574	0.000744351
-1.06923	0.00321135		-1.07174	0.00242807		-1.0676	0.00101472		-1.07197	0.00174809		-1.07435	0.00123671		-1.07062	0.00104954		-1.0719	0.00139675		-1.06938	0.000967227		-1.06711	0.00104966		-1.0682	0.00117415		-1.06393	0.000788433		-1.06773	0.000781562		-1.06529	0.000861755		-1.06631	0.000922875		-1.07078	0.000883107		-1.06856	0.00152144
-1.06361	0.00359876		-1.06799	0.00203193		-1.06073	0.00119401		-1.06759	0.00111312		-1.06935	0.00120438		-1.06281	0.00109984		-1.06784	0.00118099		-1.0647	0.000612924		-1.06024	0.000969797		-1.06195	0.000925413		-1.05643	0.000629917		-1.06429	0.000685067		-1.06185	0.00114534		-1.06256	0.000866147		-1.06672	0.000583962		-1.06074	0.00129344
-1.0558	0.00415587		-1.06112	0.00276028		-1.05635	0.00131457		-1.06072	0.00166343		-1.06185	0.000967953		-1.0575	0.000491313		-1.06159	0.00123302		-1.06095	0.00121314		-1.05649	0.000961247		-1.05758	0.000362088		-1.05236	0.000759218		-1.05898	0.00127112		-1.05623	0.00101317		-1.05725	0.00103037		-1.06109	0.000216607		-1.05543	0.00115228
-1.04955	0.00363965		-1.05362	0.00220689		-1.05104	0.00102364		-1.05259	0.00117303		-1.05435	0.00111934		-1.05343	0.000789513		-1.05346	0.000724698		-1.05438	0.000341361		-1.0518	0.00150473		-1.05196	0.000588565		-1.04799	0.000718694		-1.05148	0.00146411		-1.04841	0.00108803		-1.04975	0.000910073		-1.05297	5.51675e-05		-1.05105	0.000614566
-1.04517	0.00352696		-1.0483	0.00199032		-1.04323	0.000747032		-1.04728	0.00128106		-1.04966	0.000542768		-1.04625	0.0011425		-1.04721	0.000613207		-1.04688	0.000694277		-1.0443	0.00135356		-1.04384	0.000995169		-1.0408	0.000359064		-1.04492	0.00147966		-1.04216	0.000588954		-1.04349	0.000890869		-1.04641	0.000634212		-1.04449	0.000525411
-1.03986	0.0037389		-1.04361	0.00262188		-1.03635	0.00113943		-1.04353	0.00144414		-1.04497	0.000103724		-1.03812	0.000757178		-1.04315	0.00105195		-1.04126	0.000671396		-1.03742	0.00157449		-1.03727	0.00145386		-1.03361	0.000493831		-1.04054	0.00120801		-1.03779	0.000768918		-1.03881	0.00116546		-1.04266	0.000727227		-1.03637	0.00105013
-1.03205	0.00361988		-1.03737	0.00322263		-1.03229	0.00153826		-1.03759	0.00203933		-1.03747	0.000321461		-1.03343	0.000359727		-1.03753	0.000587398		-1.03688	0.00100883		-1.03242	0.00107842		-1.03352	0.000887781		-1.02861	0.000566775		-1.03523	0.000636362		-1.03217	0.000639073		-1.0335	0.000888883		-1.03766	0.00112131		-1.03074	0.00142764
-1.02486	0.00377806		-1.02955	0.00230851		-1.02791	0.00125771		-1.03009	0.00127111		-1.02966	0.0010343		-1.02968	0.000630084		-1.0294	0.000588843		-1.03095	0.000996579		-1.02774	0.00101993		-1.02852	0.00135152		-1.02424	0.00117332		-1.02773	0.000455492		-1.02466	0.00042337		-1.02631	0.00137846		-1.03016	0.000969279		-1.02668	0.00138399
-1.02017	0.00312324		-1.0233	0.00243496		-1.02041	0.00125149		-1.02416	0.00133657		-1.02529	0.000958924		-1.02312	0.00114767		-1.02253	0.00069538		-1.02282	0.00082324		-1.02086	0.000796085		-1.02102	0.00156813		-1.01737	0.00131223		-1.02054	0.00102852		-1.01748	0.000729584		-1.01881	0.00195943		-1.02328	0.00107128		-1.0198	0.000797055
-1.01548	0.00346937		-1.01924	0.00214068		-1.01354	0.00106431		-1.01978	0.00106223		-1.02154	0.000832104		-1.01562	0.00135785		-1.01846	0.00124293		-1.01657	0.0007858		-1.01305	0.00115672		-1.01414	0.000946294		-1.00955	0.000914341		-1.01585	0.00106442		-1.01279	0.000666565		-1.01381	0.00167711		-1.01891	0.000965003		-1.01168	0.000395857
-1.00798	0.00333595		-1.0133	0.00270832		-1.00854	0.00111764		-1.01415	0.0012873		-1.01466	0.00104879		-1.01	0.000924018		-1.01315	0.00105339		-1.0122	0.00123925		-1.00742	0.00144566		-1.00946	0.00134555		-1.00361	0.000984081		-1.01117	0.00072554		-1.0081	0.000479622		-1.00912	0.00097563		-1.01391	0.00100627		-1.00637	0.00111281
-1.00048	0.00342579		-1.00549	0.00286903		-1.00385	0.00150651		-1.00634	0.00126324		-1.00716	0.000977821		-1.00562	0.00132012		-1.00503	0.000488294		-1.00688	0.001175		-1.00336	0.00151289		-1.00477	0.00142036		-0.999551	0.000726987		-1.00367	0.00086731		-1.0006	0.000462704		-1.00225	0.00100719		-1.00641	0.000602993		-1.00293	0.00162592
-0.995797	0.00357284		-0.99893	0.00260027		-0.996977	0.001448		-0.999468	0.00148809		-1.00185	0.000952835		-0.999684	0.00105965		-0.998153	0.000879962		-0.998758	0.000924932		-0.997111	0.00159936		-0.997273	0.00108787		-0.993302	0.000240507		-0.996168	0.00116754		-0.992791	0.000996252		-0.994437	0.00109549		-0.998907	0.000435352		-0.996679	0.00172343
-0.991109	0.00333134		-0.994554	0.00215815		-0.988852	0.00149012		-0.995092	0.00165441		-0.997473	0.000764494		-0.991872	0.00029618		-0.99409	0.000559112		-0.991884	0.000923546		-0.988986	0.00141166		-0.989766	0.000861623		-0.985177	0.000271607		-0.991163	0.00113393		-0.988103	0.00142829		-0.98912	0.000997703		-0.993906	0.000452245		-0.98918	0.00141975
-0.983609	0.00329102		-0.988927	0.00278925		-0.98354	0.00137309		-0.989782	0.00151724		-0.99091	0.000137739		-0.985307	0.00111444		-0.989715	0.000657184		-0.987821	0.00103749		-0.983048	0.000768687		-0.984768	0.00120857		-0.978924	0.000601079		-0.986792	0.00122654		-0.983727	0.00104785		-0.984748	0.00128311		-0.98953	0.000728082		-0.983244	0.00144482
-0.976109	0.00275503		-0.980802	0.00271476		-0.979478	0.00127058		-0.98197	0.00131136		-0.983098	0.000941287		-0.980931	0.00141062		-0.982215	0.000859934		-0.982507	0.00121106		-0.978986	0.00110698		-0.980397	0.000838447		-0.974862	0.000616158		-0.979605	0.000972036		-0.976228	0.00119609		-0.977561	0.000755782		-0.982656	0.00143157		-0.978865	0.000951915
-0.971422	0.00246227		-0.974241	0.00295341		-0.972915	0.00064722		-0.974779	0.000802915		-0.976849	0.0013713		-0.975621	0.00126443		-0.975026	0.000948715		-0.974382	0.00103541		-0.972735	0.00106404		-0.973523	0.0010032		-0.968926	0.00124721		-0.97148	0.00071525		-0.968415	0.000807829		-0.969749	0.000913384		-0.974531	0.000935495		-0.973242	0.000673074
-0.967671	0.00349509		-0.970491	0.00258762		-0.96479	0.001039		-0.970404	0.000960908		-0.972787	0.000798299		-0.967496	0.0010574		-0.97034	0.000728209		-0.967508	0.0006224		-0.964299	0.000903149		-0.965397	0.00129278		-0.960488	0.00130168		-0.966795	0.00127844		-0.96404	0.00100387		-0.964751	0.00137272		-0.969217	0.00113906		-0.965429	0.00110887
-0.961109	0.00403281		-0.965803	0.002177		-0.958852	0.000850579		-0.965406	0.00128661		-0.967162	0.000654471		-0.960622	0.000844752		-0.965652	0.000456911		-0.963445	0.00108255		-0.958674	0.000891102		-0.96008	0.00137561		-0.954552	0.000714924		-0.963041	0.0014712		-0.959977	0.00128428		-0.960998	0.00109505		-0.965154	0.00175103		-0.958243	0.0010961
-0.953609	0.00370799		-0.95799	0.00275523		-0.955103	0.000371441		-0.957594	0.00135716		-0.959036	0.000771423		-0.956246	0.000729783		-0.958778	0		-0.95907	0.000812609		-0.955235	0.00167378		-0.956021	0.00160347		-0.950803	0.00069796		-0.95648	0.00120664		-0.953416	0.00124791		-0.954749	0.00126037		-0.95828	0.00168197		-0.953863	0.000463885
-0.948296	0.00365942		-0.951116	0.00245496		-0.94854	0.000859709		-0.950407	0.00154916		-0.952473	0.00119535		-0.951245	0.000842058		-0.950965	0.000150308		-0.95157	0.000654987		-0.949611	0.00159955		-0.949147	0.00167781		-0.945801	0.00105947		-0.948668	0.000848788		-0.945916	0.000608621		-0.947249	0.00150185		-0.950155	0.000986813		-0.948866	0.000671216
-0.943922	0.00303992		-0.946741	0.00237128		-0.940415	0.000957446		-0.946344	0.00101527		-0.948411	0.00160689		-0.94312	0.00125253		-0.945651	0.000676179		-0.944696	0.00110266		-0.941798	0.00186615		-0.941021	0.00133936		-0.937989	0.000419379		-0.943358	0.00101914		-0.940602	0.000494002		-0.941627	0.000769688		-0.945154	0.000436208		-0.941054	0.0010752
-0.937359	0.00300441		-0.94174	0.00302238		-0.93479	0.0010502		-0.941969	0.000853806		-0.942786	0.00129571		-0.936246	0.00145148		-0.941278	0.000352645		-0.940008	0.0011646		-0.935548	0.00134404		-0.935704	0.00117002		-0.931428	0.00071794		-0.938978	0.00145588		-0.936227	0.000877193		-0.937247	0.000521807		-0.941404	0.000762295		-0.933554	0.00138539
-0.929546	0.00335802		-0.934553	0.00290467		-0.931039	0.00138989		-0.934782	0.00102961		-0.934661	0.000407758		-0.932496	0.000685996		-0.934715	0.000339432		-0.935319	0.000925163		-0.931174	0.00131334		-0.93227	0.00157754		-0.927052	0.000674023		-0.933043	0.000811288		-0.929665	0.00067735		-0.931312	0.00117142		-0.935155	0.000976122		-0.929182	0.000870422
-0.923297	0.00308254		-0.92674	0.0023768		-0.925415	0.0013874		-0.927904	0.00139232		-0.928099	0.000425815		-0.927808	0.00132394		-0.926589	0.000354504		-0.928133	0.000585652		-0.92586	0.00179192		-0.926022	0.00205527		-0.921738	0.0011		-0.924917	0.00150527		-0.921853	0.000724509		-0.923186	0.00144579		-0.927656	0.00143884		-0.92449	0.000948201
-0.919234	0.00264714		-0.921739	0.00287064		-0.917915	0.000136748		-0.922907	0.00127897		-0.924349	0.00100533		-0.920621	0.000890785		-0.920965	0.000780445		-0.92032	0.000560229		-0.918361	0.00194329		-0.918522	0.00144973		-0.914239	0.00085723		-0.918669	0.0009167		-0.915601	0.00104891		-0.916938	0.00102242		-0.921716	0.00124597		-0.916678	0.00185925
-0.913296	0.00276213		-0.917676	0.00323137		-0.911353	0.000900588		-0.918219	0.000490169		-0.919348	0.00119682		-0.913747	0.000448424		-0.916902	0.000666269		-0.91501	0.000946195		-0.911174	0.00108541		-0.912579	0.00110256		-0.906739	0.00107267		-0.91429	0.000541468		-0.911225	0.000834475		-0.912871	0.000908969		-0.917345	0.000981254		-0.909178	0.0014894
-0.905484	0.00289018		-0.91049	0.00279155		-0.906977	0.00136209		-0.911657	0.000826279		-0.911849	0.00103241		-0.908746	0.000535773		-0.910341	0.000819467		-0.910947	0.00123602		-0.906485	0.000864287		-0.908207	0.000954554		-0.902051	0.000855346		-0.90898	0.000660372		-0.905602	0.000980603		-0.907249	0.000994833		-0.911405	0.00127249		-0.904806	0.000803788
-0.898609	0.00269149		-0.902677	0.0024591		-0.901665	0.000696607		-0.903532	0.000937544		-0.904973	0.00121949		-0.904057	0.000856429		-0.902215	0.000980717		-0.904382	0.00103934		-0.901799	0.0013693		-0.902584	0.000846708		-0.897362	0.000371504		-0.901167	0.000847645		-0.89779	0.000487447		-0.899436	0.000956868		-0.903593	0.00101482		-0.90074	0.00124933
-0.894546	0.00314858		-0.897367	0.00250095		-0.894165	0.00137184		-0.897905	0.00101781		-0.900286	0.00131566		-0.897183	0.000937715		-0.896591	0.00108085		-0.896257	0.000443977		-0.894299	0.00143769		-0.894772	0.00140521		-0.890176	0.000592597		-0.894293	0.00085359		-0.890916	0.000816288		-0.892249	0.00135904		-0.896719	0.000762936		-0.893866	0.0015024
-0.889234	0.00360241		-0.892992	0.00235174		-0.886978	0.000713623		-0.893843	0.00148786		-0.895598	0.000549067		-0.889371	0.000943778		-0.892841	0.00130012		-0.890321	0.00120112		-0.886487	0.00123017		-0.887898	0.00135175		-0.882363	0.000924897		-0.889914	0.00123843		-0.886853	0.00150041		-0.88787	0.00118003		-0.892343	0.00112986		-0.886366	0.00067911
-0.881109	0.00323286		-0.886114	0.00321458		-0.88229	0.000681251		-0.887594	0.00137613		-0.888411	0.000653001		-0.883744	0.000725292		-0.887214	0.00159991		-0.886571	0.00152468		-0.881486	0.00166018		-0.883519	0.001321		-0.877362	0.00115315		-0.884604	0.00131068		-0.881226	0.00112694		-0.882873	0.00110078		-0.887342	0.0014521		-0.881369	0.000676556
-0.874234	0.00313764		-0.877992	0.00281638		-0.877602	0.000684987		-0.879469	0.000977794		-0.880599	0.000951995		-0.879681	0.000750217		-0.879402	0.00131148		-0.880006	0.00115351		-0.87711	0.00113885		-0.878521	0.000750335		-0.87299	0.00106777		-0.876478	0.000952143		-0.873101	0.000837647		-0.874747	0.00106216		-0.87953	0.000920099		-0.876989	0.0014764
-0.870484	0.00320329		-0.872678	0.00282834		-0.870103	0.000371026		-0.873217	0.00132061		-0.8756	0.00113089		-0.87312	0.000712493		-0.873464	0.000280795		-0.871885	0.000710455		-0.869923	0.00130634		-0.870709	0.000977959		-0.8658	0.00108549		-0.869604	0.000842614		-0.86654	0.00087106		-0.867873	0.000963931		-0.87203	0.00060898		-0.870428	0.00191405
-0.865797	0.00301228		-0.869241	0.00253359		-0.862603	0.000814472		-0.869154	0.00207819		-0.871224	0.000652581		-0.864995	0.000741235		-0.86909	0.000207086		-0.866258	9.66071e-05		-0.862111	0.00134559		-0.863522	0.00209566		-0.857674	0.00132675		-0.865538	0.000734687		-0.86279	0.000358025		-0.863807	0.0013959		-0.867654	0.000536065		-0.862303	0.00103503
-0.858296	0.0035356		-0.862989	0.00232185		-0.857603	0.000758652		-0.863218	0.00164169		-0.864348	0.000579932		-0.859372	0.000869228		-0.863466	0.000980098		-0.862508	0.000851437		-0.857423	0.00171828		-0.859143	0.00168034		-0.85299	0.00118199		-0.861166	0.000874627		-0.858102	0.000839762		-0.859122	0.000879612		-0.862657	0.000910049		-0.856367	0.00072926
-0.851421	0.00314205		-0.855489	0.00249198		-0.853227	0.00058476		-0.855093	0.0014527		-0.856536	0.000740558		-0.855309	0.00102574		-0.855964	0.00167403		-0.856882	0.000595128		-0.853362	0.0018267		-0.854145	0.00185932		-0.84924	0.000861377		-0.853979	0.000920588		-0.850602	0.00119271		-0.851935	0.00133476		-0.854845	0.000569422		-0.852301	0.000821897
-0.846734	0.00294163		-0.849554	0.00272005		-0.846039	0.00141376		-0.848844	0.00122623		-0.851224	0.000891735		-0.848744	0.000273276		-0.848777	0.000651403		-0.849382	0.0010398		-0.846799	0.00162656		-0.846333	0.00147772		-0.842988	0.00067195		-0.846792	0.00110283		-0.843415	0.00124769		-0.845061	0.00132659		-0.847345	0.000871133		-0.846365	0.000912446
-0.842046	0.00253426		-0.845178	0.00270488		-0.838227	0.00103568		-0.845095	0.000692807		-0.847161	0.00133687		-0.840619	0.00045269		-0.844402	0.000117686		-0.843134	0.00102524		-0.839299	0.00124863		-0.838833	0.00155735		-0.835488	0.000690044		-0.8421	0.00126129		-0.838727	0.00144754		-0.840064	0.000735695		-0.843282	0.000971845		-0.837927	0.0011611
-0.834859	0.0023803		-0.839239	0.00250692		-0.83354	0.000424978		-0.839781	0.00117465		-0.840287	0.000903913		-0.834996	0.000846773		-0.839402	0.000348309		-0.838758	0.000681334		-0.833985	0.000898291		-0.834767	0.00124046		-0.829552	0.000323252		-0.837416	0.00119429		-0.834038	0.00121576		-0.835372	0.00105443		-0.83922	0.000548681		-0.831679	0.00147663
-0.827046	0.00206642		-0.831426	0.00354726		-0.82979	0.000989817		-0.832281	0.00228707		-0.832162	0.00098517		-0.831246	0.00122873		-0.831903	0.00064046		-0.833131	0.000679948		-0.829612	0.000805606		-0.830708	0.00135083		-0.82549	0.000927347		-0.830229	0.00115039		-0.826852	0.000778223		-0.828498	0.00132174		-0.832029	0.000676336		-0.82762	0.00109493
-0.822047	0.00216663		-0.824865	0.00284144		-0.823228	0.000398625		-0.826029	0.00144622		-0.826848	0.000972992		-0.82562	0.00103899		-0.824403	0.00124252		-0.825632	0.00094296		-0.823361	0.000823676		-0.823521	0.00116658		-0.81955	0.00101122		-0.822729	0.00100451		-0.819039	0.00102544		-0.820685	0.000527326		-0.824842	0.000978902		-0.821676	0.000654964
-0.817672	0.00249279		-0.820489	0.00251497		-0.815728	0.000755332		-0.821344	0.00119686		-0.823411	0.00152269		-0.81812	0.000760322		-0.819402	0.0011463		-0.818445	0.00136452		-0.815236	0.00109163		-0.816334	0.000719358		-0.811425	0.000952981		-0.817106	0.00111266		-0.813725	0.000772302		-0.815063	0.000728411		-0.819532	0.00105011		-0.813551	0.000820969
-0.810796	0.00217258		-0.815179	0.00235495		-0.810415	0.000499059		-0.81603	0.00133981		-0.81716	0.00161864		-0.811871	0.000606057		-0.815027	0.00170005		-0.814069	0.00119557		-0.808986	0.00142157		-0.811329	0.00125492		-0.804864	0.000889273		-0.81304	0.00081952		-0.809354	0.000705053		-0.810996	0.00139943		-0.815157	0.00120128		-0.807303	0.000906641
-0.802671	0.00298041		-0.807367	0.00227656		-0.806039	0.000768198		-0.808531	0.00115337		-0.809661	0.00113341		-0.807496	0.000560474		-0.807527	0.00108953		-0.809072	0.00124364		-0.804923	0.00112971		-0.806645	0.00234554		-0.800488	0.000699845		-0.806479	0.0013802		-0.802788	0.00112779		-0.804435	0.00168462		-0.808282	0.000982537		-0.803557	0.001055
-0.797359	0.00309502		-0.800176	0.00228667		-0.79979	0.000882535		-0.801344	0.00119524		-0.803723	0.00131461		-0.801869	0.000667808		-0.800027	0.00110336		-0.801572	0.00143085		-0.799298	0.00158459		-0.800084	0.00167322		-0.795174	0.0010525		-0.798353	0.00159628		-0.794976	0.000857737		-0.79631	0.000995937		-0.800157	0.000899786		-0.798552	0.00148127
-0.792984	0.00298386		-0.795492	0.00397903		-0.791665	0.000533713		-0.796343	0.00166597		-0.799349	0.00123566		-0.79437	0.000887192		-0.795339	0.00113474		-0.794069	0.00181705		-0.791173	0.000968631		-0.792271	0.000940557		-0.787362	0.00132222		-0.792418	0.00166191		-0.78904	0.000901512		-0.790374	0.000901685		-0.79453	0.000596364		-0.791052	0.00116714
-0.786422	0.00216682		-0.790803	0.00358106		-0.785415	0.00158288		-0.791967	0.00162642		-0.793412	0.00102108		-0.787183	0.00116608		-0.791589	0.000947063		-0.789384	0.0014535		-0.784612	0.0011505		-0.786335	0.00127626		-0.780175	0.00126832		-0.788664	0.00143324		-0.784978	0.00133059		-0.78662	0.000708104		-0.790468	0.000369494		-0.784491	0.000883656
-0.778296	0.00261066		-0.782991	0.00232461		-0.78104	0.00113756		-0.78478	0.00111844		-0.785599	0.00133876		-0.782494	0.00179661		-0.784715	0.00059545		-0.784696	0.00095752		-0.780549	0.00140311		-0.782269	0.000572962		-0.775799	0.00124947		-0.782416	0.00066746		-0.778413	0.00135089		-0.780372	0.00129503		-0.784219	0.000915823		-0.779806	0.000963524
-0.772984	0.00239642		-0.775491	0.0024345		-0.775727	0.000619414		-0.776968	0.000795745		-0.779036	0.00100323		-0.777806	0.00141668		-0.777215	0.00106372		-0.777196	0.0013807		-0.774924	0.00139708		-0.77602	0.000617248		-0.770802	0.00119895		-0.773977	0.000424394		-0.770291	0.000579861		-0.771934	0.00154114		-0.776094	0.000872629		-0.774801	0.00099835
-0.769234	0.00263927		-0.771429	0.00254532		-0.767603	0.000960351		-0.771654	0.00100208		-0.774661	0.00105971		-0.770306	0.00175215		-0.771901	0.00107838		-0.769697	0.000550291		-0.766486	0.00109163		-0.768208	0.00102546		-0.76299	0.00136953		-0.768042	0.00112227		-0.764664	0.000989062		-0.765998	0.00120011		-0.769842	0.000788168		-0.767302	0.000761765
-0.763297	0.00233633		-0.767366	0.00225356		-0.760728	0.00115977		-0.767279	0.00164562		-0.769662	0.00164153		-0.762807	0.0015541		-0.767841	0.00102366		-0.765009	0.000456457		-0.759923	0.00167611		-0.761959	0.00111288		-0.755803	0.00164152		-0.764601	0.000880572		-0.761227	0.00122993		-0.762557	0.0019464		-0.765779	0.0010871		-0.759802	0.00124004
-0.755484	0.00217373		-0.760179	0.00319435		-0.756665	0.00129589		-0.760092	0.00106338		-0.761849	0.00242219		-0.757809	0.0013794		-0.761277	0.000264278		-0.761259	0.00136521		-0.756173	0.00166134		-0.757893	0.00136988		-0.75174	0.000792768		-0.758978	0.000798254		-0.755288	0.00109522		-0.756934	0.00106017		-0.759843	0.00123036		-0.754805	0.00150054
-0.749547	0.00209157		-0.752679	0.00366566		-0.751352	0.000862614		-0.752279	0.000898682		-0.75466	0.00158736		-0.753434	0.00114677		-0.753465	0.000580585		-0.754385	0.0014082		-0.751487	0.00138737		-0.751957	0.00134234		-0.747365	0.00118953		-0.751166	0.00122516		-0.747788	0.00101317		-0.749435	0.00162966		-0.751405	0.00108432		-0.750425	0.00107288
-0.745484	0.00220425		-0.747678	0.00331206		-0.743228	0.00109025		-0.747282	0.00134351		-0.749974	0.00127766		-0.745934	0.000962865		-0.747215	0.00144362		-0.746885	0.00109272		-0.743987	0.00129993		-0.743832	0.00111793		-0.740178	0.00112903		-0.744917	0.00158782		-0.741853	0.000996252		-0.743186	0.00134028		-0.74547	0.000854026		-0.743239	0.000792179
-0.739859	0.00240487		-0.74299	0.00284719		-0.736353	0.00128572		-0.743532	0.00138214		-0.745286	0.00103262		-0.738122	0.00055239		-0.743152	0.00124231		-0.741884	0.00107146		-0.737111	0.00137823		-0.737584	0.00118356		-0.732987	0.00139536		-0.740538	0.00177441		-0.737477	0.0007262		-0.738502	0.00097585		-0.74172	0.00107448		-0.735426	0.000742262
-0.732047	0.00268937		-0.736429	0.00314423		-0.732603	0.00114815		-0.736967	0.00145339		-0.737473	0.00136941		-0.733434	0.000958598		-0.737214	0.001341		-0.737196	0.00159841		-0.732423	0.00174062		-0.73383	0.00147313		-0.72799	0.000984269		-0.735228	0.00138774		-0.73185	0.0012828		-0.733184	0.000837894		-0.736719	0.000874768		-0.730116	0.000776624
-0.724859	0.0034782		-0.728303	0.00421239		-0.727914	0.00108237		-0.729467	0.00105853		-0.729973	0.00101772		-0.729684	0.00104999		-0.729402	0.00129248		-0.730634	0.00173038		-0.727736	0.00155214		-0.72852	0.00156423		-0.723614	0.00100255		-0.727728	0.00150321		-0.724038	0.000472644		-0.725684	0.000955764		-0.729219	0.000316678		-0.726057	0.00147152
-0.720484	0.00279707		-0.722677	0.00367486		-0.720415	0.00117118		-0.723844	0.00110803		-0.725598	0.00132427		-0.723119	0.000798495		-0.722841	0.000458976		-0.722822	0.00148008		-0.720549	0.000927049		-0.72102	0.00152935		-0.71674	0.00122327		-0.720541	0.0017616		-0.716851	0.000813328		-0.718497	0.00139612		-0.722654	0.000972273		-0.718863	0.00145945
-0.715484	0.00278075		-0.718301	0.00347024		-0.71354	0.00130336		-0.719469	0.00150752		-0.721535	0.00150673		-0.715619	0.0012952		-0.718465	0.00113928		-0.716882	0.0017031		-0.712737	0.000736626		-0.714459	0.00137538		-0.708615	0.00105966		-0.715857	0.00178675		-0.712476	0.00145748		-0.713813	0.00175944		-0.717969	0.00187163		-0.710737	0.00168837
-0.707984	0.0027126		-0.712366	0.00344035		-0.708852	0.00142891		-0.71353	0.00203192		-0.714661	0.00137151		-0.710309	0.0013574		-0.71284	0.00163935		-0.712507	0.00216881		-0.707423	0.0014		-0.709767	0.0018701		-0.702988	0.00142306		-0.710852	0.0015414		-0.707478	0.00149871		-0.709121	0.00174598		-0.712656	0.00173692		-0.70574	0.00188015
-0.700484	0.00293395		-0.70424	0.00289662		-0.704165	0.00133864		-0.705717	0.00234097		-0.707162	0.00215889		-0.705933	0.00102035		-0.704715	0.00147273		-0.706571	0.00160696		-0.70336	0.00180902		-0.704769	0.00178038		-0.698926	0.00167639		-0.703665	0.00189171		-0.699666	0.00209317		-0.701621	0.00185083		-0.705156	0.00163257		-0.702307	0.00168582
-0.695797	0.00326933		-0.697992	0.00342219		-0.696977	0.00140068		-0.699156	0.00200555		-0.70216	0.00177906		-0.699681	0.00117933		-0.698152	0.00191436		-0.698759	0.0015575		-0.696799	0.00195436		-0.69727	0.00188318		-0.692677	0.00167582		-0.696165	0.00162852		-0.692166	0.00226319		-0.694121	0.00138685		-0.697656	0.00164968		-0.696051	0.00190731
-0.691109	0.00327471		-0.693929	0.00375533		-0.689165	0.0018958		-0.69478	0.00196947		-0.697474	0.0014872		-0.691556	0.00167334		-0.694402	0.00175084		-0.692197	0.00121475		-0.688674	0.00224233		-0.68977	0.00221475		-0.684239	0.00202904		-0.691168	0.00199141		-0.687478	0.00175946		-0.689124	0.00228346		-0.692968	0.00178909		-0.688238	0.00160224
-0.683297	0.00335054		-0.68799	0.00404915		-0.683853	0.00167626		-0.689466	0.00186075		-0.690911	0.00213496		-0.685307	0.00225245		-0.689403	0.00208119		-0.687822	0.00282102		-0.682736	0.00288335		-0.684773	0.00281777		-0.6783	0.00188447		-0.686476	0.00251024		-0.68279	0.00204495		-0.684432	0.00264237		-0.68828	0.00162338		-0.682615	0.00177915
-0.675796	0.00371471		-0.679552	0.00376498		-0.679477	0.00275966		-0.681654	0.0020044		-0.683098	0.00199113		-0.680932	0.0029243		-0.681903	0.00212723		-0.682508	0.00222266		-0.678674	0.00316938		-0.680394	0.00291323		-0.67455	0.0024062		-0.679289	0.00237373		-0.67529	0.00235772		-0.677245	0.00262559		-0.681406	0.00212074		-0.678557	0.00248357
-0.671734	0.00367785		-0.673303	0.00329712		-0.672915	0.00252082		-0.674467	0.0028323		-0.677161	0.00176772		-0.675622	0.00281764		-0.675027	0.00287237		-0.674383	0.00168947		-0.67211	0.00278018		-0.673519	0.00292653		-0.668301	0.00268949		-0.671476	0.00262983		-0.66779	0.002326		-0.669433	0.00268298		-0.673593	0.00217633		-0.672613	0.00275452
-0.667672	0.0032175		-0.669553	0.00465864		-0.66479	0.00194892		-0.670092	0.00269397		-0.673098	0.00289945		-0.667497	0.00265709		-0.670339	0.00219784		-0.667821	0.00237912		-0.663985	0.00305454		-0.665707	0.00284118		-0.659863	0.00259619		-0.666792	0.00245353		-0.663415	0.00298622		-0.664748	0.00359107		-0.668279	0.00170313		-0.664488	0.00227299
-0.660797	0.00308407		-0.664552	0.00453127		-0.659165	0.00254945		-0.665094	0.0023715		-0.666848	0.00242786		-0.660619	0.00317714		-0.665653	0.00220197		-0.664072	0.0030177		-0.65836	0.00367205		-0.660397	0.00429412		-0.653928	0.00187712		-0.662726	0.00258272		-0.659352	0.00391501		-0.660995	0.00290173		-0.663904	0.00311033		-0.657927	0.00336769
-0.653296	0.00336993		-0.65674	0.00445839		-0.655102	0.00301012		-0.657282	0.00280639		-0.658724	0.00248392		-0.656556	0.00331187		-0.658466	0.00328447		-0.659071	0.0028506		-0.654923	0.00327586		-0.656018	0.00331317		-0.650487	0.00266348		-0.656164	0.0036588		-0.652478	0.00384628		-0.654433	0.00334032		-0.656717	0.00368745		-0.653555	0.00341204
-0.648296	0.00411652		-0.650178	0.00426113		-0.64854	0.00324502		-0.650091	0.00397317		-0.652474	0.00281084		-0.651246	0.00386269		-0.650653	0.00369431		-0.651571	0.00313881		-0.648986	0.00339808		-0.649144	0.00358899		-0.644864	0.00376461		-0.648665	0.00409966		-0.644978	0.00378644		-0.646621	0.0039076		-0.648904	0.00388225		-0.648237	0.00352464
-0.643609	0.00490438		-0.64549	0.00538262		-0.640415	0.00380177		-0.646032	0.00459982		-0.648411	0.00282239		-0.643121	0.00400572		-0.645652	0.00394599		-0.644697	0.00347231		-0.641173	0.00356285		-0.641018	0.00440701		-0.637364	0.00384491		-0.643355	0.0046505		-0.639664	0.00516355		-0.641311	0.00452939		-0.64422	0.00407726		-0.640425	0.00398876
-0.637047	0.00513475		-0.640489	0.00575714		-0.63479	0.00330333		-0.641657	0.00427458		-0.642474	0.00311635		-0.636247	0.00382968		-0.641277	0.00437916		-0.640321	0.00430456		-0.635236	0.00381332		-0.636021	0.00533472		-0.631112	0.00418682		-0.638975	0.00494913		-0.635602	0.0046871		-0.636939	0.00541695		-0.640466	0.00351169		-0.633238	0.00449908
-0.629234	0.00547243		-0.633302	0.00578979		-0.631352	0.00423505		-0.634157	0.00478141		-0.634349	0.00392493		-0.632497	0.00409442		-0.634403	0.00492671		-0.63532	0.00529444		-0.63086	0.00479808		-0.632267	0.0054249		-0.626427	0.00410634		-0.632727	0.00485492		-0.62904	0.00484253		-0.630683	0.00632018		-0.633905	0.00391026		-0.628866	0.00560028
-0.623296	0.00567285		-0.62549	0.00696255		-0.625727	0.00529438		-0.627279	0.00533773		-0.628098	0.00446119		-0.627808	0.00468835		-0.62659	0.00582071		-0.628133	0.00584612		-0.625548	0.00622411		-0.626019	0.00574729		-0.621426	0.00617628		-0.624914	0.00535637		-0.620915	0.00616086		-0.622558	0.00692256		-0.626405	0.00463471		-0.623869	0.00601982
-0.619234	0.00620846		-0.620489	0.00740743		-0.617915	0.00558634		-0.622282	0.00566367		-0.624348	0.00517004		-0.620309	0.00549134		-0.620965	0.00537495		-0.620634	0.00614934		-0.617736	0.00584735		-0.618206	0.00608069		-0.613614	0.00581175		-0.618666	0.0063339		-0.614976	0.0066629		-0.616309	0.00594317		-0.62047	0.00577141		-0.616057	0.00673074
-0.613296	0.00692127		-0.616117	0.00742766		-0.611664	0.00572952		-0.617594	0.00724544		-0.619349	0.00531639		-0.613431	0.00665293		-0.616903	0.00552299		-0.61532	0.00574604		-0.610549	0.00570822		-0.612584	0.00716879		-0.606427	0.00566718		-0.614294	0.00626942		-0.610913	0.00689954		-0.612563	0.00549752		-0.616094	0.00633592		-0.608557	0.00716142
-0.605172	0.00695006		-0.609239	0.00664482		-0.60729	0.00665107		-0.61072	0.00781865		-0.611537	0.00676286		-0.608746	0.00765172		-0.610027	0.00523249		-0.610944	0.00649117		-0.606173	0.00655774		-0.608204	0.00752698		-0.601739	0.00648464		-0.608664	0.00683101		-0.604977	0.00726243		-0.606933	0.00629237		-0.610155	0.00716771		-0.60449	0.0080467
-0.598609	0.00795025		-0.601427	0.00878021		-0.601977	0.00796917		-0.602907	0.00833057		-0.604973	0.00731004		-0.604058	0.00801594		-0.601901	0.00649235		-0.604383	0.00726795		-0.601174	0.00733478		-0.602269	0.00843036		-0.59705	0.00720541		-0.600851	0.00827614		-0.596852	0.00825001		-0.598495	0.00748145		-0.602342	0.00757312		-0.600432	0.00906548
-0.594546	0.00895889		-0.596117	0.00960719		-0.594164	0.00753257		-0.597593	0.00915615		-0.600285	0.00780305		-0.596871	0.00944093		-0.596589	0.00836335		-0.596258	0.00812563		-0.593673	0.00856826		-0.594456	0.0083808		-0.589551	0.00894287		-0.593977	0.00935999		-0.590291	0.00952477		-0.591933	0.0095711		-0.595468	0.00813485		-0.593245	0.00908429
-0.588609	0.0102875		-0.591741	0.0102532		-0.58729	0.00869898		-0.593218	0.00968287		-0.595286	0.00753051		-0.589059	0.0101893		-0.593152	0.00957469		-0.590635	0.00909933		-0.586173	0.0099187		-0.587895	0.00979886		-0.582051	0.00970416		-0.589918	0.0102255		-0.586228	0.0117738		-0.587874	0.01134		-0.591405	0.00905666		-0.585737	0.00970373
-0.580484	0.0106456		-0.584867	0.0114184		-0.582602	0.0112509		-0.586657	0.00952418		-0.588099	0.00875546		-0.583745	0.0104851		-0.586902	0.0104724		-0.586572	0.00900873		-0.581487	0.0119671		-0.583516	0.0103934		-0.57705	0.0109855		-0.584601	0.00988614		-0.580601	0.0111438		-0.582252	0.00930888		-0.586092	0.00995003		-0.581053	0.0128121
-0.573922	0.0118525		-0.576742	0.0134977		-0.577603	0.0118807		-0.578844	0.0113898		-0.580599	0.0102422		-0.579369	0.0120095		-0.579402	0.011444		-0.579694	0.0110158		-0.576798	0.0121513		-0.578205	0.0122819		-0.572362	0.0107135		-0.576475	0.0114417		-0.572163	0.0126998		-0.574126	0.0107202		-0.578279	0.0104756		-0.576368	0.014255
-0.570484	0.0142818		-0.571741	0.0144973		-0.570103	0.0120397		-0.572905	0.0142755		-0.575598	0.0117278		-0.572808	0.0124422		-0.573465	0.012343		-0.571569	0.0117093		-0.568986	0.0129696		-0.570393	0.0144406		-0.565175	0.0124461		-0.569601	0.01382		-0.565602	0.0154272		-0.567245	0.0138617		-0.571092	0.0128805		-0.569494	0.014093
-0.565484	0.0158389		-0.567991	0.0147813		-0.562602	0.0143723		-0.568529	0.0154708		-0.570912	0.0128822		-0.564683	0.0143496		-0.569089	0.0132694		-0.566259	0.0140612		-0.561486	0.0141677		-0.563519	0.0151632		-0.557362	0.0155282		-0.565855	0.0158197		-0.562165	0.017812		-0.563499	0.0172216		-0.566717	0.014988		-0.561682	0.0147972
-0.557984	0.0161754		-0.561742	0.0175988		-0.557915	0.0159622		-0.562281	0.0155598		-0.564036	0.0151883		-0.559056	0.01793		-0.563464	0.0152439		-0.562822	0.0160273		-0.557111	0.0178712		-0.559147	0.0168348		-0.552678	0.0189609		-0.561163	0.0174002		-0.557164	0.018294		-0.558814	0.0176269		-0.561407	0.0158309		-0.555739	0.0185071
-0.551109	0.0192528		-0.554239	0.0183435		-0.553227	0.0180987		-0.554155	0.0171286		-0.556224	0.017075		-0.554993	0.0199981		-0.555652	0.0168783		-0.556882	0.0159497		-0.553048	0.0202519		-0.55383	0.0183114		-0.548615	0.0196899		-0.553663	0.0185652		-0.549664	0.01943		-0.55162	0.0185952		-0.553594	0.017589		-0.551993	0.021928
-0.546734	0.0221827		-0.548303	0.0208325		-0.545727	0.0195486		-0.54822	0.0198744		-0.550912	0.0190926		-0.548432	0.0204928		-0.548778	0.0188126		-0.54907	0.0186311		-0.546174	0.0209796		-0.546017	0.0199486		-0.54205	0.0213133		-0.546476	0.0201621		-0.54279	0.0237172		-0.544433	0.0221762		-0.546407	0.0202911		-0.545744	0.0237703
-0.541734	0.0241752		-0.543928	0.0236815		-0.537915	0.0235711		-0.544779	0.0229209		-0.546849	0.0210762		-0.539994	0.0232316		-0.544402	0.022559		-0.543134	0.0227926		-0.538985	0.0256265		-0.53883	0.0235403		-0.534863	0.0236074		-0.541792	0.0227371		-0.538102	0.0273708		-0.539748	0.0260445		-0.542345	0.0247911		-0.537619	0.0265092
-0.534234	0.0252485		-0.537992	0.0254877		-0.533852	0.0273202		-0.539156	0.026619		-0.539973	0.0229684		-0.534684	0.0265118		-0.539401	0.0253178		-0.538759	0.0246824		-0.533673	0.028653		-0.534771	0.0264765		-0.52924	0.027598		-0.537108	0.0247095		-0.533414	0.028933		-0.535064	0.0277165		-0.537969	0.0253661		-0.531363	0.0315474
-0.526734	0.0287148		-0.53018	0.0291929		-0.52979	0.0284845		-0.531656	0.0299873		-0.53185	0.028604		-0.530934	0.0292883		-0.531589	0.0279428		-0.533132	0.0254597		-0.529298	0.0301743		-0.530392	0.0299696		-0.524865	0.031487		-0.529913	0.0294179		-0.526227	0.0309874		-0.527869	0.0304388		-0.530782	0.0279673		-0.527304	0.0354902
-0.521734	0.0354126		-0.523614	0.0376101		-0.522915	0.032832		-0.525091	0.0342258		-0.526848	0.0321085		-0.525307	0.0356896		-0.524402	0.0317614		-0.52532	0.0307167		-0.522736	0.0342318		-0.523205	0.0334053		-0.518925	0.0359543		-0.522413	0.0352682		-0.518414	0.0361499		-0.52037	0.0350174		-0.523592	0.0332198		-0.521368	0.0363697
-0.517359	0.0411396		-0.519239	0.0400115		-0.515727	0.0383866		-0.520719	0.0400253		-0.523099	0.035034		-0.517495	0.0407334		-0.519716	0.0369943		-0.518446	0.0367925		-0.514924	0.0393488		-0.516018	0.0380931		-0.5108	0.0398312		-0.517103	0.0421895		-0.5131	0.0431307		-0.514747	0.0411051		-0.518594	0.0379484		-0.51293	0.0410986
-0.510484	0.0465437		-0.513929	0.0434681		-0.510415	0.0433955		-0.515406	0.0431044		-0.516848	0.0370501		-0.511559	0.0467854		-0.515027	0.0416925		-0.51407	0.0402732		-0.508986	0.0461453		-0.511021	0.0446782		-0.504552	0.0458464		-0.512732	0.0442056		-0.508729	0.0483158		-0.510688	0.0468082		-0.513906	0.04154		-0.506994	0.0472651
-0.502359	0.0546788		-0.506116	0.0467071		-0.505726	0.0475421		-0.507906	0.0458888		-0.509349	0.0434592		-0.507184	0.049092		-0.507528	0.0437776		-0.509069	0.0451278		-0.504924	0.0517107		-0.506642	0.0503961		-0.500176	0.0514864		-0.506163	0.0470291		-0.501851	0.0529035		-0.504127	0.0498379		-0.507032	0.0467931		-0.503241	0.0543848
-0.497046	0.0602037		-0.49893	0.0539481		-0.499478	0.0519998		-0.500406	0.0528981		-0.503411	0.0518712		-0.501557	0.0551932		-0.500028	0.052576		-0.501257	0.0501204		-0.498986	0.0551941		-0.499768	0.0539546		-0.494549	0.0563201		-0.498045	0.0542358		-0.493726	0.0571884		-0.496001	0.0576599		-0.499219	0.0538067		-0.497931	0.0587703
-0.492984	0.0661789		-0.494554	0.0637201		-0.491665	0.0606507		-0.495718	0.060369		-0.499035	0.0571327		-0.494057	0.0605999		-0.495652	0.0620551		-0.493757	0.0569776		-0.490861	0.0617332		-0.491642	0.0585878		-0.486737	0.0640226		-0.492415	0.0612534		-0.488415	0.0663606		-0.490058	0.069179		-0.49328	0.0592678		-0.490431	0.067009
-0.485797	0.067593		-0.489553	0.0684721		-0.485415	0.0690971		-0.49103	0.0631955		-0.493098	0.0601817		-0.486871	0.0690606		-0.491277	0.0645479		-0.489381	0.0656478		-0.484298	0.0735509		-0.486019	0.0667474		-0.479863	0.072455		-0.488356	0.0686533		-0.48404	0.0728892		-0.485999	0.0718596		-0.489217	0.0660273		-0.48387	0.0763794
-0.477984	0.076812		-0.48174	0.0753247		-0.481352	0.0741736		-0.483843	0.0724521		-0.485285	0.0690707		-0.482182	0.0777808		-0.484403	0.0695033		-0.484697	0.0725825		-0.480237	0.0830266		-0.481953	0.0724243		-0.4758	0.0816301		-0.481795	0.078833		-0.477479	0.0814296		-0.479751	0.0771995		-0.482969	0.0726147		-0.47949	0.0837704
-0.472671	0.0902903		-0.474554	0.083887		-0.475415	0.0765523		-0.47603	0.0822682		-0.478411	0.0780884		-0.477494	0.0835386		-0.477214	0.0778231		-0.476884	0.0774154		-0.474299	0.085046		-0.475705	0.0792427		-0.470177	0.0866364		-0.473356	0.0867015		-0.469353	0.0897801		-0.471313	0.0870555		-0.474844	0.0822835		-0.474493	0.0911454
-0.468921	0.0985451		-0.470491	0.0910151		-0.467602	0.0853525		-0.471029	0.0888479		-0.474349	0.0849512		-0.469994	0.0904498		-0.471902	0.0885458		-0.469385	0.0901925		-0.466174	0.0942613		-0.467579	0.089981		-0.462052	0.0959323		-0.467726	0.0965853		-0.46404	0.103799		-0.465682	0.101406		-0.468904	0.0928291		-0.466681	0.100156
-0.462984	0.105421		-0.466115	0.098263		-0.461039	0.0997127		-0.466654	0.0958627		-0.469037	0.0903163		-0.462495	0.101143		-0.467527	0.0981025		-0.465009	0.102203		-0.459924	0.106701		-0.461644	0.102227		-0.455174	0.110466		-0.464605	0.104624		-0.460602	0.109445		-0.462249	0.109398		-0.465154	0.102308		-0.459181	0.110723
-0.455484	0.112595		-0.458929	0.102252		-0.456666	0.112184		-0.459467	0.104603		-0.461224	0.100254		-0.457806	0.115088		-0.460965	0.1032		-0.461259	0.106348		-0.455861	0.118313		-0.457585	0.109095		-0.451424	0.122532		-0.45867	0.111751		-0.45435	0.115665		-0.456313	0.116282		-0.458906	0.108943		-0.454489	0.120703
-0.449547	0.1255		-0.451742	0.115527		-0.451039	0.116962		-0.451654	0.118668		-0.454035	0.117381		-0.453122	0.124728		-0.453153	0.110559		-0.454382	0.114617		-0.450862	0.12401		-0.451329	0.118223		-0.44674	0.12783		-0.450857	0.119312		-0.446851	0.12774		-0.448813	0.124169		-0.450468	0.118662		-0.450117	0.131247
-0.445171	0.137473		-0.446741	0.131871		-0.442916	0.125536		-0.446966	0.133317		-0.449662	0.126699		-0.445309	0.134529		-0.447215	0.132054		-0.446882	0.123191		-0.443673	0.130357		-0.443203	0.130495		-0.439549	0.136588		-0.444914	0.131389		-0.440915	0.140448		-0.442557	0.139387		-0.444532	0.135204		-0.442618	0.141574
-0.439234	0.148401		-0.442365	0.142062		-0.436352	0.14191		-0.443216	0.142429		-0.444661	0.132038		-0.437806	0.145887		-0.44284	0.14033		-0.441885	0.138465		-0.436799	0.146276		-0.437268	0.146586		-0.432362	0.152059		-0.440542	0.141505		-0.436539	0.14971		-0.438186	0.151025		-0.441095	0.142952		-0.434805	0.152458
-0.431422	0.155967		-0.435491	0.152429		-0.432602	0.152513		-0.436655	0.150662		-0.436848	0.141992		-0.433434	0.159194		-0.436902	0.144272		-0.437196	0.150133		-0.432111	0.164191		-0.433522	0.158894		-0.427678	0.166025		-0.43492	0.14784		-0.430604	0.160427		-0.432876	0.158147		-0.435468	0.148768		-0.4298	0.166676
-0.424859	0.1691		-0.427366	0.16346		-0.427914	0.158792		-0.428842	0.16086		-0.429661	0.155345		-0.429684	0.171188		-0.428777	0.159302		-0.430635	0.1558		-0.427111	0.170585		-0.428204	0.16333		-0.42299	0.17505		-0.42742	0.161256		-0.422791	0.169822		-0.425063	0.169706		-0.427969	0.155757		-0.425429	0.177228
-0.420484	0.183101		-0.421739	0.179408		-0.420415	0.17263		-0.423529	0.170207		-0.425599	0.16871		-0.422807	0.17485		-0.422527	0.175064		-0.422823	0.16397		-0.419923	0.176681		-0.420704	0.173831		-0.416112	0.180619		-0.420225	0.1756		-0.415913	0.186304		-0.417876	0.183704		-0.421407	0.168248		-0.418242	0.183941
-0.415171	0.192364		-0.417676	0.191374		-0.41354	0.188964		-0.419157	0.184557		-0.421223	0.179356		-0.415307	0.187089		-0.418464	0.185568		-0.416883	0.180617		-0.412423	0.196683		-0.414143	0.18977		-0.408299	0.197403		-0.415854	0.188357		-0.411538	0.201819		-0.413497	0.200879		-0.417032	0.185036		-0.410429	0.198206
-0.407359	0.207039		-0.411428	0.198253		-0.408852	0.200427		-0.412905	0.195074		-0.414036	0.18617		-0.409997	0.206795		-0.412526	0.191968		-0.41282	0.195815		-0.407424	0.208007		-0.409771	0.201772		-0.402989	0.211547		-0.410856	0.196944		-0.406541	0.209535		-0.408813	0.210672		-0.411718	0.197502		-0.405432	0.215402
-0.400172	0.220351		-0.403303	0.206687		-0.404164	0.207987		-0.404779	0.207247		-0.406849	0.202		-0.405621	0.219944		-0.404403	0.204765		-0.406885	0.199852		-0.403048	0.219274		-0.404454	0.210047		-0.398614	0.226176		-0.403357	0.211331		-0.398728	0.219659		-0.401	0.215857		-0.404218	0.210611		-0.401678	0.227011
-0.395797	0.23754		-0.397367	0.223512		-0.396977	0.218275		-0.398531	0.222438		-0.401848	0.220252		-0.399056	0.225504		-0.398153	0.220649		-0.398759	0.209368		-0.396174	0.22625		-0.396954	0.221516		-0.392052	0.233178		-0.395857	0.227588		-0.391541	0.23588		-0.3935	0.233881		-0.396719	0.224412		-0.39543	0.232063
-0.390796	0.251886		-0.393304	0.239436		-0.389165	0.232355		-0.394468	0.238605		-0.397473	0.228301		-0.391244	0.242674		-0.394403	0.231938		-0.392194	0.233151		-0.388049	0.242732		-0.389454	0.239791		-0.383927	0.244386		-0.391165	0.242573		-0.386853	0.257829		-0.388808	0.255196		-0.39203	0.235911		-0.38793	0.242142
-0.382984	0.257466		-0.387052	0.250537		-0.383853	0.251385		-0.388842	0.244113		-0.390599	0.23726		-0.385308	0.258899		-0.389089	0.242651		-0.388132	0.252168		-0.382735	0.261882		-0.38477	0.256519		-0.377988	0.266845		-0.38648	0.248373		-0.382165	0.262854		-0.384437	0.261753		-0.387655	0.250448		-0.382307	0.261134
-0.375796	0.272159		-0.378614	0.260044		-0.37979	0.258374		-0.381029	0.254321		-0.382786	0.248976		-0.380933	0.265852		-0.381902	0.256162		-0.382509	0.261286		-0.378362	0.274968		-0.380391	0.264557		-0.373925	0.278075		-0.378981	0.259371		-0.374352	0.272435		-0.376937	0.270348		-0.380155	0.253871		-0.377928	0.27863
-0.371422	0.287411		-0.372678	0.277715		-0.372914	0.270978		-0.374155	0.277467		-0.376849	0.269414		-0.374997	0.272243		-0.375028	0.274221		-0.374384	0.270574		-0.371798	0.284286		-0.372891	0.27272		-0.367676	0.280969		-0.371481	0.272264		-0.366852	0.295741		-0.369124	0.287512		-0.372343	0.273907		-0.371992	0.287983
-0.367359	0.29791		-0.368928	0.29144		-0.364791	0.291218		-0.370092	0.285433		-0.372786	0.289657		-0.367184	0.285491		-0.37034	0.287735		-0.367822	0.283211		-0.363673	0.299294		-0.365391	0.289488		-0.359238	0.300615		-0.367102	0.289741		-0.36279	0.313812		-0.364745	0.300794		-0.367342	0.293884		-0.363867	0.303264
-0.360484	0.311014		-0.363615	0.297317		-0.359477	0.309608		-0.364469	0.296389		-0.366536	0.294375		-0.360619	0.303733		-0.365341	0.297561		-0.364072	0.303551		-0.358361	0.318152		-0.360394	0.305694		-0.353612	0.328417		-0.363043	0.30319		-0.358414	0.318903		-0.360686	0.312507		-0.36297	0.305459		-0.357618	0.317603
-0.352984	0.326884		-0.355802	0.309116		-0.355414	0.325205		-0.356344	0.311653		-0.358723	0.3036		-0.356244	0.319736		-0.358152	0.313607		-0.359384	0.309223		-0.354924	0.322377		-0.356022	0.315464		-0.350175	0.334317		-0.356169	0.315591		-0.35154	0.329329		-0.353812	0.325712		-0.355779	0.316005		-0.353239	0.326364
-0.347984	0.347844		-0.349241	0.331376		-0.34854	0.334892		-0.349466	0.330487		-0.352473	0.322429		-0.350621	0.327761		-0.350652	0.328085		-0.351572	0.320438		-0.348674	0.333366		-0.348835	0.33166		-0.344552	0.339		-0.348669	0.328911		-0.344353	0.341409		-0.346625	0.338472		-0.347967	0.331553		-0.347929	0.344829
-0.343609	0.35446		-0.344865	0.346027		-0.340415	0.345388		-0.345716	0.336166		-0.34841	0.336495		-0.342496	0.349229		-0.345653	0.341098		-0.345007	0.333857		-0.341174	0.351526		-0.34071	0.349474		-0.336739	0.35046		-0.343352	0.345739		-0.339352	0.352394		-0.341308	0.356247		-0.343282	0.34768		-0.340117	0.347304
-0.336734	0.367984		-0.339551	0.355552		-0.335103	0.361426		-0.341032	0.345831		-0.342473	0.348176		-0.335934	0.368566		-0.341277	0.355571		-0.340322	0.350203		-0.335236	0.362877		-0.336018	0.364997		-0.3308	0.369466		-0.339293	0.358981		-0.334664	0.363133		-0.336936	0.367007		-0.33922	0.359517		-0.33293	0.368817
-0.328609	0.385892		-0.332052	0.362609		-0.331666	0.371541		-0.333532	0.360577		-0.334036	0.362337		-0.332181	0.383214		-0.334401	0.36187		-0.335321	0.363049		-0.330861	0.381797		-0.332585	0.367491		-0.326424	0.389868		-0.332731	0.367566		-0.328103	0.37936		-0.330375	0.37996		-0.332655	0.366303		-0.32855	0.388103
-0.322984	0.40804		-0.324552	0.385929		-0.325415	0.377675		-0.326654	0.380687		-0.328099	0.382517		-0.327496	0.38792		-0.326589	0.387437		-0.328134	0.375461		-0.325236	0.398679		-0.326016	0.38044		-0.320801	0.403107		-0.324606	0.381669		-0.32029	0.4006		-0.322562	0.396189		-0.325155	0.382075		-0.323553	0.396689
-0.318609	0.418376		-0.319555	0.411231		-0.317916	0.391374		-0.321657	0.395232		-0.324662	0.399236		-0.319997	0.405478		-0.321277	0.409296		-0.320322	0.396304		-0.317424	0.406626		-0.318516	0.4043		-0.313302	0.413636		-0.318663	0.401884		-0.314351	0.420842		-0.316314	0.410647		-0.319845	0.402476		-0.315428	0.411175
-0.312671	0.426233		-0.315179	0.414972		-0.311978	0.410968		-0.316969	0.410494		-0.319348	0.402593		-0.313119	0.422621		-0.316902	0.409482		-0.315321	0.411598		-0.310548	0.418852		-0.312893	0.418396		-0.306115	0.429336		-0.314604	0.420596		-0.310288	0.425966		-0.312247	0.429597		-0.315469	0.414674		-0.308554	0.432593
-0.304546	0.441617		-0.30768	0.417065		-0.307602	0.424543		-0.310095	0.418874		-0.311535	0.415294		-0.308434	0.431113		-0.310027	0.422847		-0.311258	0.422935		-0.306174	0.445522		-0.308522	0.429866		-0.301427	0.4462		-0.308668	0.428498		-0.30404	0.437964		-0.306624	0.432957		-0.309217	0.427417		-0.304487	0.447776
-0.298297	0.459843		-0.300176	0.439773		-0.301978	0.441828		-0.302282	0.442457		-0.304974	0.437503		-0.303433	0.444022		-0.301902	0.442209		-0.304071	0.42878		-0.301173	0.452596		-0.302578	0.444377		-0.296738	0.462451		-0.300543	0.440668		-0.295914	0.4625		-0.298499	0.446785		-0.301092	0.441411		-0.299803	0.455841
-0.294234	0.475665		-0.295179	0.46673		-0.294165	0.453376		-0.296968	0.456394		-0.300912	0.451139		-0.296246	0.460624		-0.296903	0.46634		-0.296259	0.443914		-0.293361	0.462257		-0.294453	0.460785		-0.289239	0.47016		-0.294295	0.469013		-0.289666	0.481771		-0.291938	0.473653		-0.294843	0.455795		-0.292616	0.463723
-0.287984	0.483788		-0.290803	0.47942		-0.287289	0.473283		-0.292906	0.468149		-0.295598	0.465255		-0.288747	0.473168		-0.293153	0.484021		-0.290945	0.466119		-0.286174	0.487871		-0.288205	0.484108		-0.281426	0.488576		-0.290228	0.486184		-0.285603	0.493656		-0.287871	0.491121		-0.290781	0.475065		-0.285429	0.485283
-0.279859	0.500069		-0.283304	0.491028		-0.282916	0.492976		-0.286032	0.478153		-0.288098	0.481636		-0.283746	0.49409		-0.286903	0.491503		-0.286569	0.481752		-0.281485	0.501167		-0.283833	0.504513		-0.276738	0.505092		-0.284605	0.490401		-0.279664	0.501037		-0.282249	0.493918		-0.285154	0.494104		-0.280745	0.505712
-0.273922	0.518681		-0.275491	0.507287		-0.277602	0.505807		-0.277906	0.498743		-0.280598	0.501983		-0.27937	0.513622		-0.279403	0.500863		-0.279695	0.49662		-0.276799	0.518626		-0.278523	0.507536		-0.272362	0.529655		-0.276167	0.506612		-0.271226	0.520174		-0.274123	0.51793		-0.277032	0.509389		-0.276053	0.507498
-0.270172	0.532445		-0.270803	0.523211		-0.270102	0.522622		-0.27228	0.514631		-0.275912	0.519072		-0.272496	0.519863		-0.273776	0.519481		-0.27157	0.518207		-0.269299	0.527822		-0.270398	0.513935		-0.26455	0.538561		-0.269606	0.523397		-0.264977	0.545362		-0.267562	0.540824		-0.270155	0.519245		-0.269179	0.524425
-0.264859	0.545906		-0.267053	0.541728		-0.262602	0.544166		-0.268217	0.53215		-0.271536	0.534572		-0.264371	0.54025		-0.269403	0.530363		-0.266573	0.532468		-0.261487	0.546104		-0.263516	0.539847		-0.256737	0.554845		-0.266165	0.540715		-0.26154	0.556406		-0.263808	0.548441		-0.266092	0.532215		-0.261366	0.548411
-0.257359	0.562002		-0.260492	0.55418		-0.257914	0.557171		-0.261656	0.539703		-0.264348	0.544499		-0.259057	0.566046		-0.263465	0.539684		-0.262819	0.543946		-0.257111	0.571904		-0.259457	0.558848		-0.252362	0.577745		-0.261168	0.561067		-0.256226	0.56013		-0.258811	0.556857		-0.260469	0.548268		-0.255743	0.568336
-0.250796	0.580441		-0.252992	0.57455		-0.253228	0.57081		-0.25353	0.555214		-0.256535	0.564516		-0.254681	0.576536		-0.255653	0.567179		-0.25657	0.555262		-0.253049	0.581931		-0.254147	0.575184		-0.248612	0.585365		-0.253355	0.569828		-0.248727	0.572865		-0.251311	0.57008		-0.252657	0.56546		-0.251677	0.583926
-0.246422	0.602426		-0.247365	0.59159		-0.245728	0.584335		-0.247904	0.578089		-0.251223	0.579349		-0.247807	0.584571		-0.24909	0.588467		-0.249071	0.569304		-0.246173	0.593158		-0.246022	0.594887		-0.241738	0.594059		-0.246794	0.584824		-0.242478	0.597256		-0.244124	0.596221		-0.245782	0.589744		-0.245115	0.592993
-0.241109	0.614884		-0.24299	0.594361		-0.238227	0.60482		-0.244154	0.593748		-0.247161	0.593427		-0.239682	0.604351		-0.244714	0.609885		-0.243135	0.593802		-0.238673	0.604484		-0.239148	0.607748		-0.234551	0.611906		-0.242102	0.603804		-0.23779	0.612948		-0.239745	0.609412		-0.242029	0.604283		-0.23699	0.604932
-0.233609	0.624102		-0.237054	0.605196		-0.233853	0.615178		-0.238218	0.60372		-0.239974	0.602116		-0.234372	0.637454		-0.239402	0.617413		-0.23876	0.617858		-0.233674	0.625152		-0.235081	0.618576		-0.229237	0.632529		-0.237105	0.6164		-0.232476	0.628415		-0.235061	0.617973		-0.237344	0.618378		-0.231054	0.626781
-0.226421	0.642056		-0.228929	0.627383		-0.22979	0.631494		-0.230719	0.623686		-0.231848	0.628507		-0.230931	0.642617		-0.23159	0.631792		-0.23282	0.619848		-0.229298	0.639158		-0.230709	0.637184		-0.224553	0.645978		-0.229918	0.631819		-0.225289	0.63134		-0.227561	0.63636		-0.229845	0.63529		-0.227301	0.648077
-0.221422	0.664976		-0.222677	0.651126		-0.222914	0.649335		-0.224466	0.632376		-0.227162	0.645587		-0.224683	0.652619		-0.224403	0.655384		-0.225008	0.637574		-0.222424	0.650473		-0.22321	0.653787		-0.218301	0.659268		-0.222105	0.652688		-0.217789	0.660469		-0.220061	0.655061		-0.222967	0.646981		-0.221052	0.662835
-0.217046	0.685685		-0.218301	0.669311		-0.215415	0.664284		-0.220095	0.652476		-0.22341	0.661151		-0.217183	0.672101		-0.220027	0.671966		-0.218446	0.658984		-0.214612	0.672814		-0.216328	0.665255		-0.210488	0.684978		-0.2171	0.677076		-0.212788	0.686155		-0.215064	0.668353		-0.217969	0.659721		-0.212614	0.676703
-0.209859	0.696017		-0.212991	0.678906		-0.210415	0.683158		-0.214468	0.663998		-0.216849	0.666723		-0.211243	0.691531		-0.215028	0.685416		-0.214071	0.685752		-0.208674	0.69367		-0.211331	0.68421		-0.20424	0.703924		-0.212729	0.688984		-0.2081	0.697994		-0.210685	0.685878		-0.213281	0.678991		-0.206679	0.689334
-0.202046	0.712989		-0.205179	0.68629		-0.20604	0.700228		-0.206968	0.682129		-0.209349	0.685302		-0.206872	0.701637		-0.207216	0.693151		-0.208757	0.690486		-0.204612	0.705842		-0.206646	0.696192		-0.199864	0.727117		-0.205855	0.694614		-0.200913	0.715665		-0.203811	0.699737		-0.206407	0.688998		-0.203238	0.708312
-0.196734	0.734171		-0.198305	0.708432		-0.199164	0.699382		-0.199781	0.70514		-0.203724	0.705049		-0.201245	0.707646		-0.200027	0.711851		-0.200944	0.706869		-0.198674	0.722226		-0.199772	0.71255		-0.194237	0.736662		-0.197729	0.716411		-0.193101	0.740059		-0.195685	0.718889		-0.198595	0.710778		-0.197615	0.731022
-0.192672	0.743368		-0.193929	0.733395		-0.191352	0.727297		-0.195093	0.726297		-0.199349	0.718137		-0.193433	0.735554		-0.195651	0.738527		-0.193758	0.719731		-0.190549	0.734853		-0.19196	0.728175		-0.186112	0.750172		-0.192419	0.739367		-0.188103	0.761897		-0.190375	0.740917		-0.192968	0.732817		-0.189802	0.744701
-0.185484	0.755899		-0.188615	0.741685		-0.185414	0.749856		-0.190405	0.742113		-0.193411	0.734236		-0.186559	0.747787		-0.191591	0.744457		-0.189382	0.727892		-0.184298	0.748402		-0.186329	0.75222		-0.179551	0.772538		-0.188353	0.762795		-0.183728	0.766862		-0.186309	0.760874		-0.188905	0.739731		-0.183554	0.753276
-0.177359	0.77698		-0.18049	0.762385		-0.181353	0.768261		-0.182592	0.752003		-0.185286	0.747165		-0.182183	0.760242		-0.184402	0.752334		-0.184385	0.74356		-0.180236	0.766328		-0.18227	0.769981		-0.175488	0.782772		-0.181791	0.761241		-0.176541	0.77662		-0.179435	0.767782		-0.182344	0.751305		-0.179182	0.76738
-0.172359	0.800655		-0.173616	0.785608		-0.175416	0.773516		-0.175093	0.766948		-0.178723	0.763617		-0.176869	0.768894		-0.177215	0.767597		-0.176572	0.763038		-0.174298	0.779884		-0.175709	0.77524		-0.169865	0.788092		-0.173666	0.778389		-0.168729	0.794458		-0.17131	0.776826		-0.174219	0.771062		-0.173864	0.785184
-0.168921	0.812542		-0.169553	0.798087		-0.16729	0.78847		-0.170404	0.775507		-0.17466	0.783395		-0.169057	0.788301		-0.172214	0.773607		-0.169069	0.778483		-0.166173	0.797348		-0.167584	0.793139		-0.161427	0.807733		-0.168043	0.794512		-0.163727	0.819174		-0.165687	0.797625		-0.168279	0.791702		-0.166365	0.786853
-0.162359	0.81671		-0.165178	0.810176		-0.16104	0.804612		-0.165716	0.786248		-0.169348	0.792889		-0.16187	0.805131		-0.167528	0.792026		-0.165319	0.79817		-0.159612	0.819806		-0.161953	0.823742		-0.154862	0.830446		-0.164602	0.808474		-0.159978	0.830324		-0.162246	0.807865		-0.164217	0.800925		-0.159178	0.802977
-0.154546	0.826379		-0.157678	0.810581		-0.156664	0.82512		-0.158216	0.803086		-0.161223	0.797192		-0.157494	0.815185		-0.160964	0.821779		-0.160947	0.8056		-0.156173	0.829162		-0.157582	0.817488		-0.151425	0.848086		-0.158354	0.827421		-0.153725	0.836816		-0.15631	0.813623		-0.157968	0.810662		-0.154493	0.830835
-0.148922	0.838683		-0.150804	0.831702		-0.15104	0.834697		-0.150404	0.818925		-0.154349	0.820376		-0.152493	0.833639		-0.152839	0.832982		-0.153757	0.822016		-0.150861	0.832767		-0.151333	0.832542		-0.146428	0.855234		-0.150854	0.836757		-0.146226	0.8441		-0.14881	0.830383		-0.14953	0.818507		-0.149801	0.840453
-0.144546	0.866507		-0.145803	0.842657		-0.142602	0.837369		-0.146032	0.845016		-0.149973	0.839984		-0.144681	0.841897		-0.147214	0.849146		-0.14657	0.839777		-0.143361	0.847491		-0.143208	0.85129		-0.138924	0.862212		-0.144919	0.848763		-0.14029	0.859664		-0.142875	0.847335		-0.143907	0.842864		-0.142302	0.851494
-0.138609	0.870507		-0.141115	0.850319		-0.136353	0.84872		-0.14197	0.855607		-0.144662	0.852348		-0.137494	0.853617		-0.142841	0.864013		-0.141573	0.849429		-0.136798	0.862167		-0.137585	0.872692		-0.13205	0.882682		-0.140539	0.86151		-0.136227	0.873712		-0.138495	0.856508		-0.140466	0.858382		-0.134802	0.870029
-0.130796	0.880082		-0.133928	0.868162		-0.132914	0.865879		-0.135092	0.842335		-0.136849	0.861695		-0.133118	0.87224		-0.136903	0.864743		-0.137197	0.859135		-0.132111	0.871029		-0.133831	0.87892		-0.127362	0.88488		-0.134916	0.866373		-0.130288	0.882039		-0.13256	0.871002		-0.134531	0.863156		-0.129805	0.889604
-0.124234	0.884766		-0.126115	0.886739		-0.127602	0.878579		-0.127905	0.868031		-0.12966	0.877029		-0.129056	0.87776		-0.128778	0.870172		-0.130319	0.86697		-0.12711	0.887338		-0.128209	0.877026		-0.122678	0.895066		-0.127104	0.886981		-0.122163	0.895602		-0.124747	0.876654		-0.127031	0.875485		-0.125113	0.887658
-0.120171	0.894702		-0.120801	0.896805		-0.120103	0.888681		-0.122595	0.893207		-0.12591	0.89406		-0.122182	0.880295		-0.12284	0.882388		-0.122507	0.876156		-0.119923	0.895621		-0.120709	0.898239		-0.115487	0.906684		-0.12023	0.900379		-0.115601	0.90299		-0.118186	0.899611		-0.121091	0.900594		-0.117926	0.904099
-0.114547	0.91464		-0.11643	0.896871		-0.113539	0.904558		-0.117906	0.900095		-0.121537	0.900072		-0.114682	0.902641		-0.118778	0.900433		-0.116884	0.900955		-0.112424	0.909413		-0.11446	0.912091		-0.107674	0.919076		-0.115851	0.907178		-0.111226	0.913384		-0.113807	0.92425		-0.11672	0.905419		-0.110113	0.918678
-0.106734	0.919208		-0.109865	0.907061		-0.108853	0.913732		-0.111341	0.899472		-0.114035	0.911098		-0.109681	0.91933		-0.112527	0.904865		-0.112508	0.916746		-0.107423	0.920386		-0.110081	0.929616		-0.102677	0.935371		-0.110853	0.913521		-0.106229	0.922457		-0.10881	0.92382		-0.111093	0.905403		-0.105429	0.928521
-0.0995462	0.926716		-0.102052	0.915413		-0.103852	0.922223		-0.103529	0.91615		-0.107161	0.916445		-0.105309	0.917084		-0.104089	0.928246		-0.10626	0.913002		-0.102736	0.925622		-0.104771	0.921976		-0.0983016	0.945212		-0.103041	0.921089		-0.0981033	0.932183		-0.100997	0.924837		-0.103281	0.916574		-0.101362	0.926611
-0.0951717	0.943206		-0.0961166	0.936642		-0.0963522	0.930027		-0.0975932	0.925018		-0.102162	0.931873		-0.0984314	0.936429		-0.0981515	0.938056		-0.0981346	0.91285		-0.0958603	0.939775		-0.0969585	0.929664		-0.0914275	0.945375		-0.095854	0.934304		-0.0909126	0.947381		-0.0938101	0.933035		-0.0960937	0.935981		-0.0948011	0.942093
-0.0901716	0.947126		-0.0920539	0.950981		-0.0888525	0.942052		-0.0935306	0.930189		-0.0977865	0.934113		-0.0903061	0.941032		-0.0944017	0.94018		-0.0921951	0.929705		-0.0880478	0.937247		-0.0897716	0.940374		-0.0833022	0.949268		-0.0911695	0.946053		-0.0865409	0.945282		-0.0891257	0.941612		-0.0917183	0.949925		-0.0873014	0.951508
-0.0823591	0.954271		-0.0854888	0.949447		-0.0838514	0.952776		-0.0875911	0.944513		-0.0909105	0.930685		-0.0846832	0.946528		-0.0890897	0.94403		-0.0881324	0.938549		-0.0827359	0.939479		-0.0850796	0.948823		-0.0776755	0.956946		-0.0864774	0.954955		-0.0815398	0.95189		-0.0844336	0.944071		-0.0867172	0.949953		-0.0819913	0.954557
-0.0751712	0.962137		-0.0773673	0.940416		-0.0794779	0.951329		-0.0794696	0.948318		-0.0827852	0.951965		-0.0806206	0.944517		-0.08159	0.961718		-0.081884	0.953782		-0.0786732	0.946076		-0.0803951	0.956307		-0.0736129	0.963377		-0.0786649	0.956195		-0.0737273	0.955916		-0.0766211	0.94623		-0.0792175	0.951076		-0.0776197	0.962597
-0.0711086	0.973075		-0.0714278	0.952541		-0.0726019	0.958251		-0.0729045	0.95584		-0.0771604	0.962331		-0.0743683	0.958683		-0.0753396	0.962325		-0.0737587	0.950194		-0.0714863	0.956027		-0.0728954	0.958578		-0.0670516	0.958006		-0.0711652	0.960406		-0.0665405	0.972031		-0.0691214	0.964801		-0.0717178	0.967222		-0.0713636	0.963105
-0.0667341	0.972185		-0.0679908	0.963233		-0.0647894	0.96973		-0.0688419	0.969693		-0.0730978	0.958616		-0.0662468	0.959334		-0.0706514	0.976233		-0.0675064	0.958264		-0.0636738	0.967289		-0.0653957	0.974269		-0.0589263	0.968731		-0.0671064	0.976772		-0.0624778	0.98247		-0.0647498	0.964327		-0.0667167	0.967545		-0.0635511	0.968701
-0.0595462	0.980359		-0.0623641	0.963299		-0.0594774	0.972699		-0.063219	0.964169		-0.0665365	0.964731		-0.0599945	0.957505		-0.0653394	0.987642		-0.0637565	0.974394		-0.0586727	0.976127		-0.0603908	0.979641		-0.0532996	0.985025		-0.0630399	0.983293		-0.0581023	0.991454		-0.0606833	0.974912		-0.0623413	0.967861		-0.0573026	0.987847
-0.0523593	0.990135		-0.0545516	0.975557		-0.055102	0.980307		-0.0550937	0.964804		-0.058724	0.970322		-0.0559319	0.971322		-0.0578397	0.986234		-0.0587593	0.978033		-0.0549229	0.969603		-0.0560192	0.983179		-0.0498626	0.987797		-0.055853	0.984094		-0.0509155	0.983775		-0.0538092	0.984557		-0.0548416	0.976018		-0.052931	0.988197
-0.0473592	0.992503		-0.0483031	0.977917		-0.0479151	0.986129		-0.0485286	0.972977		-0.0527864	0.973701		-0.0499962	0.97953		-0.05034	0.989759		-0.0509468	0.97524		-0.0483616	0.978323		-0.0485195	0.991729		-0.0439269	0.977107		-0.0486661	0.989054		-0.0437286	0.986886		-0.0463095	0.976638		-0.0470291	0.983684		-0.0473005	0.987898
-0.0426719	0.994698		-0.0439277	0.980442		-0.0401026	0.985611		-0.0447787	0.975723		-0.0487238	0.981881		-0.0418709	0.986267		-0.0456517	0.988116		-0.0443817	0.986438		-0.0408619	0.994818		-0.0410198	0.996274		-0.0364272	0.985017		-0.0433561	0.996466		-0.0387275	0.996815		-0.0413123	0.97954		-0.0426574	0.995375		-0.039488	0.986063
-0.0357969	0.987688		-0.0383048	0.98755		-0.0347906	0.979636		-0.0397815	0.985796		-0.0421606	0.989977		-0.0356186	0.989862		-0.0409654	0.998035		-0.04001	0.988795		-0.0352352	0.998563		-0.0363354	1.00932		-0.0304877	0.998601		-0.0389768	0.995377		-0.034352	0.996948		-0.036933	0.991392		-0.0385948	0.996646		-0.0326139	0.992268
-0.0279844	0.998614		-0.0308013	0.978799		-0.0310408	0.973685		-0.0322818	0.991399		-0.0340353	0.991181		-0.0318687	0.992459		-0.0340894	0.998151		-0.035009	0.988141		-0.0308617	0.997814		-0.0325817	0.996106		-0.0261123	0.999167		-0.0324155	1.00073		-0.027478	0.996552		-0.0300589	0.994993		-0.0317169	1.00156		-0.028555	0.996968
-0.0226715	1.00253		-0.0236144	0.989228		-0.0251032	0.985078		-0.0254039	0.998578		-0.0284105	1.0029		-0.0268715	0.998679		-0.0262769	0.997246		-0.0275093	0.984993		-0.0249241	0.993892		-0.0257076	0.997025		-0.0204894	0.990727		-0.0242902	0.99977		-0.0193526	1.00396		-0.0222464	0.991595		-0.0242172	0.993759		-0.0229322	1.00614
-0.0186088	1.00367		-0.0189261	0.992692		-0.0176016	1.00229		-0.0207195	0.994435		-0.0246607	1.00253		-0.0193718	1.00073		-0.0209649	1.00128		-0.0200096	0.988087		-0.0171116	0.993306		-0.0182079	0.998097		-0.0126769	1.01622		-0.0183546	0.996798		-0.013726	0.994062		-0.0163107	0.996365		-0.0189071	1.00285		-0.0148069	1.00964
-0.0120466	1.00434		-0.0142417	0.990919		-0.011664	1.00096		-0.0157184	0.985585		-0.0190359	0.995591		-0.0124939	1.00002		-0.0169023	1.0023		-0.0153213	0.989818		-0.0105484	0.991745		-0.0128979	0.99405		-0.00580281	1.01182		-0.0146009	0.999062		-0.00966332	0.998718		-0.0122443	1.00376		-0.0148445	1.00313		-0.00792516	1.0014
-0.00392127	1.00653		-0.00674201	1.00056		-0.00729046	1.00057		-0.00853149	0.988501		-0.0115362	1.00278		-0.00811845	0.994991		-0.00971539	1.00135		-0.0109459	0.991405		-0.00617298	1.00192		-0.00851859	0.998345		-0.00142735	1		-0.00835243	0.99811		-0.00341484	1		-0.0059958	0.997389		-0.0082794	1.00168		-0.00417913	1.00646
0.0020163	1		0.000757688	1		-0.00135288	1		-0.0010318	1		-0.00497302	1.00937		-0.00312119	1		-0.00159008	1		-0.00375897	1		-0.00086101	1		-0.00227011	1		0.00357372	1.00207		8.56823e-05	1		0.00471046	1.00763		0.00212951	1		-0.000154092	1		0.00050532	1
0.006078	1.00494		0.00575876	0.993336		0.00645962	0.995045		0.00396927	0.997129		-0.000599474	1		0.0043785	1.00032		0.00309818	0.997755		0.00405353	1.00117		0.00695149	0.988488		0.00554239	1.01333		0.0113862	1.00948		0.00602135	0.998558		0.0106499	1.01452		0.00837798	0.99628		0.00609438	0.989357		0.00801264	0.996018
0.0123284	1.00646		0.010447	0.988618		0.0130228	1.00621		0.00834473	0.989964		0.00440159	1.0049		0.0118782	0.990167		0.00684803	1.00035		0.0093674	0.989586		0.0141384	0.984536		0.0117909	1.00654		0.0188859	1.01493		0.0100802	0.997256		0.0147088	1.00617		0.012124	0.99402		0.010157	0.997727		0.0148867	1.00455
0.0207655	1.00668		0.0176339	0.996105		0.0173983	1.00995		0.0152188	0.986152		0.0119013	1.0071		0.0168793	0.995402		0.0134093	1.00278		0.0137429	1.00425		0.0185138	0.985209		0.0161701	0.997969		0.0235742	1.00198		0.0160235	1.00641		0.0209611	1.00387		0.0180673	0.996813		0.0157837	1.00175		0.0195712	1.00169
0.0267031	1.00583		0.0251336	0.984084		0.0227102	1.00188		0.0230313	1.00204		0.019401	0.996545		0.0212547	0.995617		0.0209109	1.01676		0.0209298	0.998003		0.0235149	0.99708		0.021793	1.00486		0.0282624	0.998015		0.0241488	1.00136		0.0293992	1.00802		0.0261926	1		0.0239052	0.989156		0.0242556	0.996384
0.0301411	1.00997		0.0298219	0.983727		0.0305227	1.00009		0.028658	0.997736		0.0240892	0.991868		0.0284416	0.99003		0.0265357	1.01153		0.0287423	0.990511		0.0313274	0.996257		0.0299183	1.0147		0.0357621	1.00017		0.0303973	0.994387		0.0353349	0.997411		0.0327539	0.989707		0.0304703	0.989834		0.0314501	0.993771
0.0357659	1.00302		0.0338845	0.988596		0.0377096	0.9954		0.0327206	0.991695		0.0287756	0.996656		0.0362541	0.983652		0.0309111	1.00862		0.0337433	0.985485		0.0385143	0.991173		0.0364796	0.99669		0.0432618	0.997999		0.0341433	0.996314		0.0387719	0.996681		0.0364999	0.981971		0.0345329	0.992889		0.0389498	0.986778
0.0432656	0.991128		0.0404458	0.982065		0.0420851	0.988816		0.0395947	0.984844		0.0362772	0.998601		0.041568	0.993592		0.0368468	1.00273		0.0374932	0.992026		0.0425769	0.973715		0.0405461	0.99074		0.0476373	0.989722		0.0391482	0.988546		0.0440858	0.98394		0.0415048	0.978605		0.0401558	0.978842		0.0445727	0.979521
0.0498288	0.989508		0.0479455	0.972863		0.0470842	0.981162		0.04772	0.977144		0.0437769	0.991558		0.0456306	0.992496		0.0449721	0.996777		0.0437416	1.0003		0.0472633	0.973436		0.0461689	0.98896		0.0520127	0.993506		0.0469607	0.992382		0.0518983	0.989388		0.0490045	0.979342		0.0482811	0.975129		0.0486315	0.980868
0.0542033	0.989396		0.0532594	0.977457		0.0548967	0.979779		0.0530339	0.969505		0.0487761	0.985911		0.0528175	0.980123		0.0512225	0.992494		0.0515541	0.981908		0.0541393	0.972041		0.0542942	0.979207		0.0588868	0.996887		0.053522	0.988461		0.0581467	0.981383		0.0555658	0.97865		0.0548462	0.968592		0.0551928	0.98647
0.0595162	0.98205		0.0576348	0.979704		0.0623983	0.979245		0.0564709	0.977536		0.0531515	0.977912		0.0609428	0.97057		0.055598	0.998141		0.0571808	0.981977		0.0613262	0.976382		0.0608555	0.987311		0.0660737	0.990207		0.0582064	0.985682		0.0625222	0.96563		0.0602502	0.964866		0.0585961	0.964034		0.0633181	0.980482
0.0670159	0.98538		0.0641961	0.977199		0.0661482	0.970697		0.0627194	0.97048		0.0603384	0.986214		0.0659439	0.96671		0.0609099	0.991412		0.0615525	0.96824		0.0663273	0.965271		0.0646092	0.972028		0.0710748	0.964729		0.0632113	0.98503		0.0678361	0.978723		0.0652551	0.96017		0.0635933	0.966467		0.0692614	0.97312
0.0742037	0.968376		0.0720086	0.973185		0.0705217	0.967602		0.0702191	0.960152		0.0681509	0.976791		0.0696938	0.963385		0.0687224	0.988509		0.0674919	0.9687		0.0707008	0.969485		0.0696064	0.957559		0.075763	0.965355		0.0703982	0.980064		0.0753358	0.976239		0.0727548	0.973439		0.071093	0.97381		0.0733203	0.972261
0.078891	0.96867		0.0782609	0.954879		0.0777105	0.956565		0.0761586	0.962046		0.0728392	0.962731		0.0759422	0.968182		0.0759093	0.980606		0.0753044	0.97006		0.0775768	0.963717		0.0767933	0.950994		0.0823243	0.963176		0.0778979	0.96602		0.0828355	0.95973		0.0802545	0.966165		0.0779709	0.965995		0.0795687	0.965225
0.0838911	0.9634		0.0826363	0.940177		0.0848974	0.950436		0.0805302	0.957228		0.076589	0.955528		0.0837547	0.951936		0.0802848	0.9632		0.0818657	0.952818		0.0857021	0.95348		0.0836674	0.95575		0.0901368	0.946837		0.0828951	0.96506		0.0875237	0.945693		0.084939	0.947822		0.0826554	0.961542		0.0880068	0.941424
0.091078	0.952846		0.0882592	0.932595		0.0898985	0.946886		0.0861569	0.952638		0.0831522	0.961495		0.0893814	0.938698		0.0855986	0.961604		0.0862412	0.94727		0.0913269	0.9411		0.0883595	0.950182		0.0960725	0.940425		0.0875872	0.951505		0.0918992	0.943112		0.0896234	0.940273		0.0873436	0.937715		0.0936373	0.931569
0.0985787	0.942918		0.0960717	0.93978		0.094272	0.938631		0.0942822	0.94197		0.0906519	0.954695		0.093753	0.93187		0.0934111	0.956486		0.0915551	0.94245		0.0953895	0.932315		0.0930439	0.942999		0.100135	0.938775		0.0944613	0.954926		0.0993989	0.932089		0.0965051	0.945582		0.0948433	0.927865		0.0970706	0.927521
0.103579	0.925212		0.102946	0.93167		0.101148	0.931136		0.101156	0.927635		0.0962767	0.953882		0.0996925	0.928522		0.100285	0.944078		0.0990548	0.931195		0.10164	0.924001		0.100231	0.934504		0.106075	0.934674		0.102274	0.938702		0.107211	0.918653		0.104318	0.927783		0.102343	0.924526		0.103006	0.937885
0.107953	0.922826		0.107008	0.909046		0.108961	0.923915		0.105532	0.913306		0.100652	0.937034		0.107505	0.920251		0.104348	0.934418		0.106242	0.908884		0.109763	0.920346		0.108043	0.927907		0.1142	0.919861		0.107584	0.939691		0.112212	0.907433		0.109628	0.919155		0.107657	0.918434		0.110506	0.919112
0.115453	0.920927		0.112635	0.909898		0.114585	0.905021		0.110533	0.915865		0.106901	0.929902		0.114066	0.904907		0.108723	0.936295		0.110617	0.906266		0.115701	0.91489		0.113353	0.911787		0.120761	0.906591		0.111643	0.925421		0.116584	0.905077		0.113687	0.903749		0.112032	0.911992		0.116449	0.900099
0.123265	0.903019		0.12076	0.901818		0.118961	0.907513		0.118345	0.909957		0.114713	0.913802		0.118442	0.89258		0.11591	0.923616		0.115931	0.906852		0.119764	0.90299		0.117733	0.904439		0.124824	0.891691		0.118524	0.920623		0.123775	0.894637		0.120873	0.901248		0.118906	0.894555		0.120821	0.901513
0.127954	0.888562		0.127322	0.884924		0.124898	0.898393		0.125532	0.895174		0.120963	0.90561		0.123756	0.877887		0.123097	0.89281		0.123743	0.894154		0.125701	0.88866		0.124294	0.888601		0.130451	0.893155		0.12665	0.902831		0.131896	0.872688		0.128686	0.885422		0.127032	0.885693		0.126444	0.882439
0.131704	0.882527		0.131072	0.866057		0.133022	0.881951		0.13022	0.876059		0.125339	0.899922		0.131568	0.878621		0.128098	0.87939		0.13093	0.87709		0.134139	0.870077		0.132419	0.864315		0.138576	0.870469		0.131647	0.887645		0.136585	0.860108		0.133691	0.866928		0.132346	0.874766		0.134256	0.880963
0.138266	0.874457		0.13576	0.870055		0.139272	0.863259		0.134909	0.859682		0.130964	0.88875		0.138442	0.869759		0.132785	0.88146		0.134993	0.862278		0.140077	0.853267		0.137729	0.87301		0.145137	0.844785		0.13508	0.874252		0.140334	0.869123		0.137437	0.859553		0.136408	0.867427		0.141443	0.878915
0.146078	0.858788		0.14326	0.86581		0.143335	0.850013		0.14303	0.848835		0.138776	0.876878		0.142818	0.857145		0.139661	0.875533		0.139368	0.871606		0.143514	0.846692		0.142109	0.866945		0.148887	0.843624		0.141649	0.86866		0.146899	0.846851		0.143693	0.860866		0.143282	0.863958		0.145822	0.851131
0.151391	0.841247		0.150446	0.843294		0.149585	0.846065		0.150534	0.833304		0.145652	0.855076		0.147819	0.85448		0.147473	0.860246		0.146555	0.849576		0.149139	0.842011		0.14867	0.847872		0.153888	0.833168		0.149149	0.861286		0.154399	0.821786		0.151193	0.836878		0.151408	0.845076		0.150507	0.831622
0.155766	0.829616		0.155135	0.818254		0.15771	0.827745		0.154596	0.819369		0.149715	0.842032		0.155944	0.842121		0.152785	0.84062		0.153429	0.830835		0.156638	0.828789		0.156795	0.837262		0.161075	0.826447		0.154772	0.83996		0.159709	0.813765		0.157128	0.819497		0.156718	0.819582		0.158319	0.823157
0.162016	0.816597		0.159823	0.803811		0.163648	0.8016		0.158655	0.811888		0.155027	0.83964		0.163131	0.81231		0.156848	0.827338		0.158431	0.815308		0.162889	0.811745		0.162105	0.817124		0.167949	0.801858		0.159143	0.818877		0.164085	0.808413		0.1615	0.810911		0.160159	0.813413		0.165819	0.818895
0.169829	0.804121		0.16701	0.795228		0.167398	0.788317		0.165846	0.799206		0.163152	0.817343		0.167194	0.78446		0.163411	0.810586		0.163115	0.808442		0.167577	0.794996		0.165859	0.798643		0.172637	0.776745		0.165087	0.804091		0.170337	0.80299		0.167443	0.794444		0.166094	0.808431		0.170511	0.805511
0.176078	0.789458		0.174822	0.780294		0.17271	0.780591		0.173033	0.783194		0.170339	0.791824		0.171569	0.791221		0.171536	0.798923		0.169993	0.793759		0.172576	0.784354		0.171795	0.79679		0.177638	0.766435		0.172899	0.795421		0.178149	0.780402		0.175256	0.775712		0.173907	0.784758		0.174883	0.781475
0.180454	0.768662		0.180136	0.759829		0.18021	0.774087		0.178343	0.763043		0.174089	0.780283		0.178756	0.782743		0.177472	0.777295		0.177805	0.765939		0.180389	0.776812		0.179294	0.779766		0.184825	0.760782		0.17946	0.767005		0.184398	0.759125		0.181817	0.76186		0.179846	0.758225		0.182382	0.767901
0.186078	0.761205		0.184508	0.741935		0.186773	0.747817		0.183031	0.744051		0.178464	0.7628		0.185943	0.763816		0.181534	0.758369		0.183428	0.758543		0.187577	0.759193		0.185543	0.754125		0.192325	0.744063		0.183832	0.752732		0.188773	0.745664		0.186189	0.748525		0.183905	0.747219		0.190195	0.747468
0.193891	0.748641		0.191073	0.733666		0.191148	0.737333		0.189596	0.730777		0.185964	0.753913		0.190944	0.745233		0.187785	0.744668		0.187491	0.743081		0.192264	0.73697		0.189922	0.740791		0.197322	0.722546		0.18915	0.739685		0.194396	0.738729		0.191499	0.736121		0.189845	0.739732		0.194574	0.724398
0.200766	0.729491		0.198885	0.713558		0.19646	0.716937		0.197718	0.716404		0.192838	0.73926		0.195316	0.722413		0.19591	0.736687		0.194056	0.733403		0.196952	0.727278		0.195232	0.733593		0.201698	0.706554		0.196962	0.719262		0.202209	0.715365		0.198998	0.725449		0.197657	0.718438		0.198633	0.712739
0.205141	0.713304		0.204821	0.702445		0.20396	0.703536		0.203657	0.699738		0.197526	0.723633		0.202193	0.716472		0.201535	0.717424		0.202177	0.7077		0.204139	0.715522		0.203045	0.708915		0.208576	0.69057		0.204149	0.709261		0.209087	0.693449		0.206193	0.700781		0.204531	0.6996		0.205507	0.709167
0.210453	0.69551		0.208884	0.68855		0.21146	0.689467		0.20772	0.688565		0.202215	0.702931		0.210006	0.695717		0.205285	0.694756		0.208117	0.686524		0.211951	0.693393		0.210231	0.687611		0.216701	0.6732		0.208521	0.691503		0.213462	0.674525		0.210565	0.680888		0.208907	0.686819		0.212694	0.689388
0.218579	0.678682		0.215136	0.68082		0.216148	0.665531		0.213656	0.665633		0.209402	0.680557		0.215629	0.67808		0.21091	0.685072		0.21218	0.676761		0.216951	0.665852		0.214603	0.672329		0.222011	0.648209		0.213518	0.679649		0.218772	0.666273		0.215562	0.669801		0.213908	0.668202		0.218012	0.664752
0.225454	0.649058		0.22357	0.665389		0.220523	0.646081		0.221781	0.643575		0.217214	0.667774		0.220004	0.658968		0.218411	0.673798		0.218428	0.654518		0.221326	0.659877		0.219608	0.660164		0.226074	0.639087		0.22133	0.659374		0.226898	0.644671		0.223374	0.656036		0.22172	0.652114		0.222383	0.655207
0.229516	0.635479		0.229197	0.641981		0.228023	0.634136		0.228033	0.629287		0.222526	0.649406		0.226257	0.648454		0.22466	0.648153		0.226866	0.637437		0.228515	0.63748		0.227108	0.640688		0.232948	0.626431		0.228517	0.635211		0.233772	0.622807		0.230874	0.63526		0.228907	0.636129		0.228945	0.643271
0.234204	0.630504		0.232634	0.616485		0.235835	0.612947		0.232096	0.617279		0.226901	0.640167		0.234378	0.637493		0.229035	0.636586		0.232806	0.613273		0.236327	0.628674		0.234607	0.620038		0.241073	0.603601		0.232584	0.620699		0.237521	0.609176		0.23494	0.615011		0.233595	0.621162		0.236757	0.632361
0.241391	0.609366		0.238574	0.60291		0.240835	0.589629		0.238031	0.602869		0.233465	0.624856		0.240318	0.607133		0.234347	0.624779		0.236243	0.602802		0.241326	0.603496		0.239292	0.596618		0.246387	0.583029		0.236955	0.6079		0.24221	0.598119		0.239312	0.599522		0.238593	0.607065		0.242693	0.600955
0.248266	0.592945		0.246386	0.584072		0.24521	0.584865		0.246157	0.576265		0.241588	0.601624		0.24438	0.584006		0.241849	0.606374		0.241866	0.597271		0.245076	0.592194		0.243984	0.589166		0.249824	0.573656		0.244142	0.596012		0.249709	0.584704		0.246499	0.58979		0.246096	0.588271		0.246759	0.591123
0.253266	0.57063		0.252322	0.570016		0.252397	0.566641		0.252405	0.560648		0.247215	0.580992		0.250629	0.578821		0.249348	0.587255		0.249365	0.581985		0.25164	0.577885		0.251796	0.584069		0.256072	0.558027		0.251337	0.576432		0.256587	0.572598		0.253686	0.571368		0.253596	0.565716		0.252695	0.582282
0.257954	0.550058		0.256697	0.552001		0.260522	0.546737		0.256159	0.549737		0.251277	0.570739		0.258754	0.56242		0.254035	0.568329		0.25593	0.55538		0.259139	0.563122		0.259296	0.561049		0.263885	0.542288		0.256334	0.55461		0.261585	0.551924		0.258691	0.555132		0.257971	0.550237		0.26082	0.560915
0.265141	0.543278		0.262011	0.542312		0.265211	0.529366		0.261156	0.531872		0.257839	0.561487		0.265006	0.540264		0.258723	0.550835		0.260306	0.539022		0.264451	0.543896		0.263668	0.538832		0.269512	0.522708		0.260706	0.549384		0.266273	0.532257		0.263062	0.537282		0.26203	0.538013		0.267382	0.534055
0.272953	0.529036		0.269824	0.527204		0.26896	0.502275		0.268969	0.519814		0.265964	0.540526		0.268756	0.524442		0.26591	0.538468		0.265616	0.534082		0.268827	0.524579		0.267734	0.530669		0.273887	0.509106		0.26758	0.529239		0.273147	0.518007		0.269937	0.526114		0.268908	0.524604		0.271448	0.513621
0.278266	0.514082		0.27701	0.515961		0.275524	0.497732		0.275534	0.503805		0.271589	0.51891		0.274066	0.514551		0.273722	0.51518		0.273116	0.518901		0.275077	0.514152		0.274608	0.523656		0.279823	0.495802		0.275705	0.51838		0.280647	0.512748		0.277749	0.509567		0.276408	0.512179		0.277071	0.497528
0.282641	0.495621		0.281386	0.494549		0.283023	0.489986		0.280218	0.485095		0.275339	0.506533		0.281566	0.496111		0.278723	0.493341		0.280302	0.489224		0.283202	0.502684		0.281795	0.501592		0.287635	0.486329		0.281336	0.498925		0.286273	0.488896		0.283692	0.495152		0.281409	0.488635		0.285196	0.487523
0.289204	0.478885		0.286383	0.477613		0.288648	0.467177		0.285219	0.474695		0.280963	0.496388		0.288131	0.476151		0.283097	0.488468		0.284991	0.470109		0.289764	0.478801		0.286792	0.480014		0.2942	0.465336		0.285395	0.479821		0.290336	0.47261		0.287751	0.477382		0.28578	0.477523		0.291757	0.467532
0.297328	0.456388		0.294196	0.466415		0.293023	0.459253		0.292406	0.465647		0.288776	0.478379		0.292819	0.455942		0.290286	0.478471		0.289679	0.465725		0.293826	0.458372		0.291484	0.46571		0.298576	0.442608		0.291643	0.463605		0.296897	0.462703		0.294	0.458975		0.292658	0.470714		0.295824	0.459765
0.302953	0.446067		0.301695	0.442641		0.298961	0.449391		0.300219	0.453159		0.294713	0.459332		0.298129	0.454462		0.298098	0.458037		0.296866	0.453226		0.299138	0.448237		0.298046	0.454153		0.303886	0.434776		0.299768	0.455639		0.305023	0.436674		0.302125	0.443537		0.300471	0.456303		0.300508	0.449383
0.307016	0.432699		0.306384	0.426635		0.307084	0.43142		0.30522	0.427484		0.299089	0.441487		0.305629	0.447384		0.302785	0.440494		0.304678	0.430483		0.306951	0.435247		0.305858	0.4367		0.311698	0.419521		0.305712	0.433919		0.310962	0.427373		0.308068	0.426919		0.306406	0.43349		0.308008	0.432174
0.313579	0.416756		0.311072	0.418888		0.313335	0.408474		0.309595	0.413166		0.304401	0.430641		0.312816	0.424641		0.306534	0.423966		0.309679	0.408557		0.313827	0.415925		0.311794	0.412187		0.318885	0.402629		0.30977	0.413478		0.315025	0.411936		0.312127	0.411578		0.310469	0.420335		0.314882	0.408916
0.322016	0.410695		0.318572	0.408974		0.31771	0.393514		0.316469	0.402608		0.312213	0.419711		0.317504	0.408926		0.31341	0.418759		0.314055	0.402196		0.318202	0.396955		0.315853	0.402416		0.323261	0.380713		0.316019	0.403809		0.321273	0.400134		0.318376	0.405302		0.316409	0.40444		0.319574	0.399129
0.327641	0.3911		0.326071	0.386613		0.323022	0.381689		0.324282	0.384303		0.319402	0.402876		0.322192	0.393285		0.320597	0.40367		0.321242	0.393641		0.323514	0.386283		0.321796	0.392819		0.328262	0.374804		0.324144	0.394404		0.329711	0.391872		0.326501	0.387975		0.32453	0.39239		0.324571	0.392185
0.331079	0.376569		0.330447	0.370474		0.330835	0.371933		0.329596	0.372517		0.324088	0.379412		0.329692	0.378534		0.326222	0.382892		0.329367	0.374684		0.331639	0.373816		0.329921	0.38127		0.336074	0.365535		0.33008	0.374633		0.335334	0.370539		0.332437	0.373666		0.331095	0.367757		0.331758	0.380773
0.337016	0.36621		0.334509	0.369161		0.338024	0.356026		0.333658	0.363927		0.328777	0.371319		0.337505	0.366495		0.330598	0.371571		0.334055	0.358436		0.338826	0.356052		0.336483	0.361776		0.343574	0.343326		0.333834	0.362876		0.339084	0.352123		0.33619	0.359999		0.335158	0.354491		0.339258	0.363522
0.344516	0.347616		0.341383	0.351786		0.342397	0.33331		0.340845	0.354741		0.336276	0.362768		0.342506	0.3448		0.336848	0.354773		0.337805	0.348751		0.342576	0.3431		0.340541	0.353257		0.347637	0.325987		0.339144	0.355392		0.344711	0.341803		0.3415	0.352773		0.341093	0.345332		0.344255	0.346042
0.350766	0.329985		0.348883	0.331226		0.347398	0.32302		0.348971	0.337824		0.343776	0.344941		0.346881	0.339781		0.34466	0.340792		0.344366	0.33876		0.346952	0.336123		0.346477	0.338534		0.351699	0.31913		0.346643	0.345566		0.35221	0.334397		0.349	0.342333		0.349219	0.333308		0.348635	0.331794
0.355141	0.319222		0.354197	0.317951		0.355523	0.315138		0.353968	0.318611		0.348464	0.329482		0.354068	0.323112		0.350911	0.329441		0.351866	0.324019		0.354451	0.333014		0.354602	0.320327		0.358886	0.310726		0.353212	0.321793		0.358459	0.316417		0.355561	0.322186		0.355471	0.316982		0.355509	0.315916
0.360766	0.307502		0.35826	0.301962		0.36271	0.294523		0.357721	0.304584		0.353151	0.316936		0.36188	0.308191		0.355284	0.310481		0.357493	0.310182		0.361327	0.306802		0.361171	0.298626		0.366386	0.292516		0.357897	0.308304		0.362834	0.2989		0.360253	0.307647		0.359221	0.306642		0.363634	0.303804
0.368266	0.289936		0.364821	0.293944		0.36646	0.278858		0.36397	0.295084		0.360652	0.310725		0.366882	0.287481		0.360911	0.300323		0.361868	0.29478		0.366326	0.288737		0.364605	0.279456		0.371074	0.2778		0.362894	0.299562		0.368461	0.285835		0.365251	0.295582		0.364218	0.293758		0.368944	0.289569
0.375453	0.274905		0.372633	0.284571		0.370836	0.27045		0.37147	0.281971		0.368465	0.287928		0.370631	0.27733		0.369034	0.289193		0.367804	0.283588		0.371015	0.276107		0.369609	0.281205		0.375449	0.261337		0.370394	0.28691		0.375961	0.276555		0.37275	0.282223		0.371718	0.286197		0.373011	0.272644
0.380141	0.261391		0.378886	0.264206		0.378335	0.264646		0.377405	0.268337		0.372838	0.273368		0.377193	0.262015		0.37591	0.269405		0.375929	0.266298		0.377889	0.266849		0.377109	0.270615		0.382324	0.256256		0.377893	0.26728		0.383148	0.25959		0.38025	0.267389		0.378283	0.263905		0.379885	0.262201
0.385141	0.250981		0.382948	0.248279		0.385209	0.244636		0.381781	0.25374		0.376588	0.26804		0.385005	0.24996		0.379973	0.255954		0.382178	0.251215		0.385701	0.259255		0.383983	0.259396		0.390449	0.239566		0.382585	0.250728		0.387523	0.238903		0.384942	0.252962		0.382971	0.251827		0.38801	0.249542
0.392641	0.241312		0.388884	0.239679		0.390211	0.222382		0.38772	0.243054		0.383464	0.255421		0.390319	0.236912		0.385285	0.247503		0.386553	0.238589		0.391326	0.239762		0.388355	0.244349		0.396076	0.229868		0.38727	0.236516		0.392524	0.230938		0.389626	0.24126		0.387968	0.24179		0.393633	0.229029
0.400141	0.224863		0.397009	0.23004		0.394897	0.218923		0.395533	0.226581		0.390964	0.246343		0.394691	0.226238		0.39341	0.238035		0.39218	0.229265		0.395389	0.226704		0.393352	0.235541		0.400138	0.213221		0.394457	0.229337		0.400024	0.224896		0.396813	0.231164		0.395468	0.228825		0.397074	0.217703
0.404828	0.208171		0.403571	0.214989		0.401773	0.211105		0.402407	0.207894		0.396276	0.227096		0.400943	0.218451		0.400284	0.221939		0.399992	0.21527		0.401639	0.219762		0.400547	0.224876		0.406387	0.203171		0.402269	0.211246		0.407523	0.208431		0.404626	0.218301		0.402968	0.214803		0.403009	0.21039
0.409516	0.197735		0.407633	0.199794		0.409585	0.195516		0.406782	0.196423		0.400651	0.2198		0.408755	0.20841		0.404034	0.203222		0.406866	0.198976		0.409764	0.203075		0.408359	0.206402		0.414512	0.185947		0.407274	0.198256		0.412524	0.190058		0.409631	0.197371		0.407969	0.201215		0.410822	0.202211
0.417016	0.188366		0.41326	0.191975		0.41521	0.179742		0.412096	0.186737		0.407215	0.204071		0.415004	0.190646		0.408723	0.197661		0.410929	0.182894		0.415702	0.184626		0.413356	0.189797		0.420448	0.171756		0.411646	0.188608		0.4169	0.184847		0.414002	0.187396		0.412344	0.187504		0.416757	0.18669
0.424516	0.173057		0.421698	0.178723		0.419273	0.167317		0.419596	0.178104		0.415027	0.188661		0.419379	0.179254		0.415909	0.183013		0.416243	0.174477		0.419765	0.175784		0.417728	0.172257		0.42451	0.158469		0.418833	0.180498		0.4244	0.176272		0.421189	0.182448		0.419531	0.179203		0.420824	0.173443
0.429203	0.160739		0.428259	0.162527		0.425836	0.157754		0.426783	0.163514		0.421276	0.173602		0.425006	0.16984		0.422785	0.168467		0.424368	0.168474		0.426013	0.166015		0.424602	0.164244		0.43045	0.14945		0.426645	0.162164		0.432212	0.158356		0.429002	0.169284		0.427344	0.168591		0.42676	0.164565
0.432953	0.153171		0.431696	0.149905		0.433648	0.141874		0.431158	0.147712		0.425338	0.159801		0.432819	0.157434		0.427785	0.160456		0.431555	0.15179		0.434451	0.151102		0.432727	0.153905		0.438888	0.142214		0.431337	0.149618		0.436584	0.142377		0.433686	0.154027		0.432658	0.150419		0.434572	0.150117
0.439828	0.145884		0.436697	0.144066		0.439586	0.130489		0.436468	0.144509		0.431276	0.150408		0.439693	0.142603		0.432473	0.151172		0.435305	0.137996		0.440076	0.132956		0.438045	0.139081		0.444824	0.127839		0.435083	0.139661		0.440646	0.133115		0.43744	0.142881		0.43672	0.140173		0.441133	0.138099
0.447016	0.128126		0.444197	0.138965		0.44396	0.121672		0.444281	0.136712		0.439088	0.141268		0.444068	0.133094		0.439347	0.13732		0.439993	0.12961		0.443513	0.125072		0.442104	0.125072		0.448573	0.113667		0.441645	0.128645		0.447524	0.126808		0.444001	0.135137		0.443907	0.134334		0.445513	0.124672
0.452329	0.11652		0.451071	0.124232		0.45021	0.115852		0.451471	0.119769		0.445651	0.125892		0.449378	0.126748		0.447159	0.123152		0.44718	0.119906		0.44914	0.119628		0.449291	0.119843		0.453887	0.107411		0.449144	0.116308		0.454711	0.116508		0.451501	0.121839		0.45172	0.119839		0.450823	0.119114
0.456703	0.107802		0.45576	0.109536		0.458335	0.1022		0.45553	0.106078		0.450027	0.114231		0.457191	0.118957		0.452786	0.111284		0.454367	0.10825		0.456952	0.112559		0.457416	0.110153		0.461387	0.0981041		0.454775	0.10933		0.460021	0.107559		0.457124	0.111403		0.457034	0.109694		0.458635	0.110543
0.463266	0.101341		0.460448	0.100518		0.464273	0.0910297		0.459906	0.099596		0.455652	0.108038		0.464381	0.103614		0.456847	0.103155		0.459055	0.0996121		0.463201	0.103444		0.462734	0.0977927		0.467948	0.0871525		0.459146	0.0996123		0.464397	0.095507		0.461503	0.099537		0.460471	0.10064		0.465822	0.0964699
0.471391	0.0936161		0.467635	0.0946421		0.46771	0.0827423		0.467096	0.0955444		0.463777	0.0988047		0.468131	0.0902127		0.46341	0.0971371		0.463744	0.0925988		0.467576	0.0940145		0.466167	0.0910837		0.472637	0.0786667		0.465082	0.0926508		0.470649	0.0901218		0.467439	0.0935267		0.466719	0.0914871		0.470194	0.088592
0.477329	0.0800272		0.475447	0.087042		0.473335	0.0804671		0.474283	0.0861058		0.470338	0.086645		0.472816	0.0869291		0.471535	0.0907488		0.470618	0.0848077		0.473201	0.0840954		0.472103	0.083361		0.477638	0.0739783		0.473207	0.0832219		0.478774	0.0813602		0.475564	0.0899067		0.474532	0.0840897		0.474886	0.0813238
0.481391	0.0714755		0.480761	0.0770173		0.481147	0.0714175		0.479593	0.0747912		0.474088	0.0810571		0.480319	0.0783129		0.47716	0.0798587		0.47843	0.0741383		0.480701	0.0755931		0.479915	0.0762267		0.485137	0.0680171		0.479456	0.0727763		0.485023	0.0707216		0.482125	0.076539		0.480158	0.0735823		0.482698	0.071591
0.487329	0.0666147		0.485133	0.0688411		0.487398	0.0598316		0.483969	0.0681373		0.478776	0.0772699		0.487193	0.0701073		0.481223	0.0687091		0.48374	0.0660097		0.487889	0.0681032		0.485859	0.0662568		0.492637	0.0597528		0.483835	0.0640899		0.489085	0.0623602		0.486192	0.0649472		0.484534	0.0660305		0.490198	0.0612901
0.495453	0.0601699		0.492011	0.0628458		0.491773	0.0562471		0.490843	0.0662902		0.486589	0.0706952		0.491882	0.0623509		0.487786	0.0644115		0.488116	0.0616663		0.492576	0.0581052		0.489917	0.0579295		0.497638	0.050363		0.489458	0.0588444		0.494712	0.0579324		0.491502	0.0615342		0.490469	0.0607764		0.49457	0.0554825
0.501704	0.0505667		0.500136	0.0576165		0.497085	0.0509235		0.498655	0.0561972		0.493152	0.0620057		0.496566	0.0572884		0.495909	0.0577797		0.494681	0.0563682		0.497264	0.0500727		0.495853	0.0545677		0.50201	0.0455077		0.49727	0.0526246		0.502837	0.0547273		0.499627	0.0562799		0.498282	0.0524311		0.498636	0.0498397
0.506078	0.046408		0.505446	0.0474435		0.504897	0.0445254		0.504595	0.0471081		0.497838	0.0508335		0.503757	0.0522282		0.501536	0.049761		0.502806	0.050116		0.504764	0.0468878		0.503666	0.0495593		0.5092	0.0434928		0.504145	0.0476997		0.509399	0.0442174		0.506501	0.0501666		0.504843	0.0440373		0.50551	0.0475825
0.511704	0.0430695		0.509821	0.0416436		0.512084	0.0385624		0.508658	0.0443103		0.502839	0.0458753		0.511569	0.0467733		0.505286	0.045003		0.508742	0.0426227		0.512263	0.0419377		0.51054	0.0455497		0.517013	0.0377739		0.508524	0.0424705		0.513461	0.0388837		0.51088	0.0435513		0.509219	0.0401431		0.51301	0.0415662
0.519828	0.0379761		0.516695	0.0390898		0.516773	0.0328405		0.514906	0.0403549		0.510026	0.0439331		0.516879	0.041833		0.510911	0.0418139		0.512804	0.0377512		0.517265	0.0351721		0.514606	0.039108		0.52201	0.0311943		0.513521	0.039827		0.519084	0.0355024		0.51619	0.0408579		0.514533	0.0386061		0.518007	0.0351408
0.526391	0.0300437		0.524508	0.0348213		0.521461	0.0300516		0.523031	0.0370093		0.517526	0.0379992		0.520942	0.0346348		0.518723	0.03694		0.519053	0.0343646		0.521638	0.034724		0.519916	0.0340473		0.526386	0.0277993		0.521646	0.0338877		0.527522	0.0312082		0.524003	0.0357235		0.522345	0.035772		0.522386	0.0323856
0.530141	0.028027		0.529822	0.0301121		0.528648	0.0262169		0.528971	0.0299417		0.522527	0.0343793		0.527503	0.0320141		0.524661	0.0315254		0.527178	0.0320079		0.52914	0.0306464		0.527729	0.0313837		0.533572	0.0257182		0.528833	0.0285906		0.534087	0.0260939		0.53119	0.0298059		0.529532	0.0303271		0.529261	0.0284565
0.535141	0.0263318		0.533259	0.0262597		0.53646	0.0237008		0.533033	0.0254742		0.526901	0.0304288		0.535628	0.0282541		0.529034	0.0264767		0.533118	0.027347		0.536639	0.0263495		0.534916	0.02718		0.541385	0.0231816		0.532587	0.0260074		0.537837	0.0243076		0.534936	0.0243194		0.533907	0.0244071		0.537073	0.0255747
0.542328	0.0214574		0.539511	0.023887		0.541459	0.0197938		0.539282	0.0251816		0.533777	0.0260251		0.541255	0.0230784		0.534661	0.0236894		0.536555	0.0226627		0.541326	0.0217436		0.539608	0.0231427		0.546386	0.0190479		0.536959	0.0236588		0.542522	0.0231062		0.539628	0.0243122		0.538908	0.0240276		0.543009	0.0210125
0.549203	0.0199047		0.547011	0.0209334		0.545835	0.0173832		0.547407	0.0213535		0.541902	0.022269		0.545318	0.0198537		0.542161	0.0214854		0.542178	0.0215531		0.545076	0.0205628		0.544292	0.0214256		0.550136	0.0168148		0.544458	0.0214948		0.550021	0.0206864		0.546815	0.0236171		0.546721	0.0214407		0.547075	0.0191744
0.553891	0.0170028		0.552947	0.0193845		0.553022	0.0157622		0.553343	0.0179919		0.547214	0.0204456		0.551879	0.0184617		0.549348	0.0194661		0.54999	0.018149		0.551952	0.0191299		0.552105	0.0190424		0.556388	0.0153035		0.551332	0.0186983		0.557212	0.0166728		0.554002	0.0196572		0.554221	0.018557		0.553324	0.0180987
0.558891	0.0144966		0.557322	0.0178062		0.560834	0.0147767		0.556784	0.0169651		0.551589	0.0179636		0.560004	0.0170412		0.554036	0.0168584		0.556242	0.0157504		0.559451	0.0166072		0.559604	0.0169713		0.563888	0.0134124		0.556024	0.0151193		0.561584	0.0152401		0.558686	0.0161343		0.558283	0.0165026		0.561449	0.0164874
0.566078	0.012821		0.562949	0.0152436		0.565523	0.0125364		0.562407	0.0152318		0.558463	0.0164374		0.565631	0.0138971		0.558722	0.0164975		0.560618	0.0145817		0.564763	0.0137064		0.563671	0.0139597		0.569824	0.0108194		0.560709	0.014651		0.566585	0.0143039		0.563378	0.0137334		0.562346	0.0140664		0.567385	0.0130333
0.573891	0.012572		0.570761	0.0129977		0.569272	0.0111559		0.569906	0.0145781		0.566589	0.0140538		0.569381	0.012566		0.566535	0.014986		0.566241	0.0123641		0.569139	0.0124564		0.56773	0.0136637		0.573886	0.0104743		0.567583	0.012931		0.573772	0.0126108		0.570252	0.0124803		0.569533	0.0133852		0.571443	0.0120803
0.578891	0.010938		0.577635	0.0118766		0.576148	0.0101266		0.576471	0.0128568		0.571901	0.0118185		0.575004	0.0122318		0.574034	0.0128065		0.57374	0.0120274		0.575702	0.0125077		0.574916	0.0129907		0.580135	0.00966853		0.575708	0.0124176		0.581271	0.0111878		0.578065	0.0119482		0.57672	0.0117464		0.577387	0.0121915
0.583266	0.00969127		0.582011	0.0119996		0.583648	0.00958234		0.580843	0.011301		0.57534	0.010473		0.582816	0.0108673		0.57841	0.0110815		0.580931	0.0103335		0.583514	0.0103771		0.582103	0.0106791		0.587947	0.00851915		0.581018	0.0108159		0.586585	0.00973117		0.583688	0.0114665		0.581721	0.00926621		0.585512	0.0108196
0.590141	0.00886251		0.587321	0.00984055		0.58896	0.00791874		0.586157	0.0093537		0.581277	0.00900343		0.589069	0.0100438		0.583098	0.0107749		0.585303	0.00993621		0.589765	0.00881483		0.587108	0.0101619		0.594512	0.00724273		0.585085	0.00938103		0.590961	0.00856574		0.587754	0.0103962		0.586096	0.00841646		0.592073	0.00811752
0.598266	0.00754979		0.595133	0.00839281		0.593336	0.00672287		0.593657	0.00960538		0.58909	0.00859609		0.593444	0.00869632		0.590911	0.00969052		0.590304	0.00832532		0.593827	0.00840601		0.59148	0.00929772		0.598575	0.00716621		0.591646	0.00848742		0.597522	0.00789346		0.594315	0.00849482		0.59297	0.00780919		0.595819	0.00746348
0.603579	0.0066477		0.60232	0.00851903		0.599586	0.0074228		0.601156	0.00815546		0.595027	0.00765292		0.598754	0.00781475		0.59841	0.00889294		0.597804	0.00802278		0.599452	0.00728484		0.598354	0.00758021		0.603885	0.00697433		0.599771	0.00676492		0.605335	0.00677519		0.602128	0.00871114		0.601096	0.00749272		0.600824	0.00787745
0.607953	0.00653751		0.607008	0.00751617		0.607709	0.00638961		0.605845	0.00751956		0.599088	0.00723718		0.606567	0.0072015		0.602786	0.00693316		0.605303	0.00656212		0.607265	0.00660029		0.606166	0.00718784		0.611697	0.00645166		0.605707	0.00674915		0.611274	0.00590181		0.608064	0.00732385		0.606718	0.00743221		0.608324	0.00706112
0.614828	0.00636262		0.611697	0.00668436		0.61396	0.00485446		0.610533	0.0074726		0.604715	0.00612666		0.613753	0.00635271		0.606536	0.00773383		0.609991	0.00578279		0.614139	0.00642114		0.611797	0.00756461		0.618575	0.00554938		0.609774	0.00638146		0.615337	0.00484105		0.61213	0.00682875		0.610781	0.00674176		0.614885	0.00587773
0.622954	0.00550699		0.619509	0.00587669		0.618022	0.00448593		0.61772	0.00684942		0.612527	0.00595302		0.618442	0.00527151		0.61341	0.00739502		0.61468	0.00676296		0.618201	0.00560465		0.616169	0.00544647		0.622951	0.0045129		0.616335	0.006081		0.621585	0.00499733		0.618379	0.00579771		0.617033	0.00669301		0.61957	0.00582085
0.628266	0.00530561		0.627009	0.00511501		0.623647	0.00448779		0.625532	0.0060627		0.619714	0.00595176		0.62313	0.00450826		0.620909	0.00595512		0.622179	0.00541578		0.623826	0.0047767		0.622104	0.00582232		0.628261	0.00415515		0.62446	0.00541171		0.630023	0.00508911		0.626504	0.00465609		0.625159	0.0059104		0.624575	0.00571428
0.631704	0.00425282		0.631072	0.00469795		0.63146	0.00488911		0.630533	0.00496554		0.62409	0.00553098		0.63063	0.00463109		0.626223	0.00589876		0.629679	0.00542618		0.631952	0.00403347		0.63023	0.00489324		0.636073	0.00403999		0.630083	0.00486201		0.63565	0.00431956		0.63244	0.00464351		0.631407	0.00471297		0.632074	0.00435815
0.637953	0.00380916		0.635447	0.00563322		0.638336	0.00450917		0.634909	0.00441338		0.629089	0.00446602		0.638129	0.00385662		0.630597	0.00518149		0.634367	0.00559212		0.638515	0.0036569		0.636478	0.00558345		0.64326	0.00369827		0.633837	0.00416048		0.639087	0.00439632		0.63588	0.00326019		0.63547	0.00403556		0.639574	0.00458568
0.645454	0.00360202		0.642321	0.00483199		0.642711	0.00434025		0.642096	0.00410595		0.636901	0.00468565		0.64313	0.00387661		0.63716	0.00493332		0.638117	0.00427799		0.642265	0.00331375		0.640857	0.00499007		0.647323	0.00331753		0.639459	0.0042412		0.645023	0.00444687		0.641503	0.00279467		0.641406	0.00343792		0.644258	0.00383761
0.651703	0.00371894		0.649508	0.00423653		0.648023	0.00290844		0.650221	0.00389568		0.644088	0.00398184		0.647506	0.00396463		0.644973	0.00374448		0.644991	0.00437621		0.646951	0.00379253		0.646793	0.00410458		0.651698	0.00320896		0.646959	0.00388266		0.652522	0.00351575		0.649003	0.00332685		0.649531	0.00331069		0.648943	0.00346404
0.656079	0.00310385		0.654822	0.00363601		0.656148	0.00284495		0.654905	0.00388087		0.648776	0.00416262		0.655006	0.00376142		0.651223	0.00418467		0.652491	0.00405611		0.654451	0.00325662		0.654918	0.00446162		0.658885	0.00299786		0.653208	0.00327602		0.658462	0.0030448		0.655564	0.00362352		0.655783	0.00366372		0.655825	0.00277866
0.661703	0.00283739		0.659197	0.00422848		0.663022	0.00235087		0.658346	0.0038094		0.653465	0.00394278		0.662818	0.00284997		0.655286	0.00373024		0.657805	0.00360081		0.661327	0.002718		0.661167	0.0036911		0.666072	0.00270966		0.657587	0.00332312		0.662837	0.00281112		0.659936	0.00378112		0.65922	0.00310071		0.663637	0.0029247
0.669516	0.00244345		0.665759	0.00368061		0.666772	0.00179765		0.664908	0.00289267		0.661277	0.00318123		0.667506	0.00279294		0.66091	0.00261222		0.66218	0.00318411		0.666015	0.00266437		0.664608	0.00271107		0.671073	0.0022703		0.662897	0.00314203		0.66846	0.00266161		0.665254	0.00313548		0.664843	0.00305709		0.668947	0.00311044
0.676704	0.00251525		0.673571	0.00310423		0.671461	0.00239029		0.67272	0.0019815		0.668777	0.00228403		0.671256	0.00238785		0.669036	0.00299501		0.668742	0.00210756		0.670701	0.00267136		0.669918	0.00325122		0.675449	0.00186638		0.670709	0.00256672		0.676273	0.00219256		0.672753	0.00289201		0.672343	0.0023707		0.673006	0.00223282
0.681078	0.00201094		0.679511	0.00256026		0.67896	0.00202985		0.678343	0.00259473		0.67284	0.0029301		0.67813	0.00295416		0.675597	0.00289157		0.676554	0.00244707		0.677888	0.00210145		0.677417	0.00341873		0.682323	0.00228708		0.677896	0.00169163		0.683147	0.00197749		0.67994	0.00298097		0.678595	0.00202772		0.680193	0.00205474
0.686078	0.00268093		0.683573	0.0032893		0.685834	0.00156482		0.682718	0.00321976		0.676902	0.00239385		0.68563	0.00221562		0.67966	0.00292956		0.682803	0.00237843		0.685701	0.00171692		0.683979	0.00284462		0.690448	0.00225956		0.682581	0.00200169		0.687522	0.00171695		0.684625	0.00210401		0.683283	0.00202409		0.688005	0.00258898
0.693891	0.00213169		0.689822	0.00368567		0.690523	0.00146169		0.688658	0.0032385		0.684089	0.00164132		0.690944	0.00255424		0.685284	0.00285895		0.686865	0.00219469		0.690702	0.00154243		0.688671	0.00289854		0.695762	0.00206806		0.687273	0.00259301		0.692523	0.00159874		0.689317	0.00203315		0.688281	0.00214533		0.69301	0.00255949
0.701079	0.00205624		0.697947	0.00335253		0.695211	0.0021666		0.696783	0.00271363		0.691276	0.00154012		0.695316	0.00199938		0.69341	0.00248297		0.692805	0.00154317		0.695077	0.00196252		0.693668	0.00305366		0.699825	0.00184885		0.694773	0.00246405		0.700336	0.00173155		0.696816	0.00184443		0.69578	0.0021171		0.696756	0.0028107
0.705766	0.00214532		0.704195	0.00287317		0.702398	0.00140981		0.703032	0.00211081		0.696277	0.00184919		0.701881	0.00188935		0.699973	0.00234278		0.700617	0.00147314		0.701638	0.00157429		0.701168	0.00194766		0.706386	0.00184357		0.702272	0.00147966		0.707523	0.00173747		0.704316	0.00258586		0.703284	0.00253599		0.703012	0.00190801
0.710453	0.00232635		0.708258	0.00227747		0.71021	0.00099293		0.707407	0.00241661		0.700963	0.0026519		0.710006	0.00180178		0.703723	0.00237499		0.707179	0.00186258		0.709764	0.00190015		0.708667	0.00162435		0.714511	0.00195855		0.706957	0.00135321		0.712211	0.00130902		0.709313	0.00214374		0.707968	0.00185816		0.710825	0.00116134
0.718266	0.00159723		0.714198	0.00231886		0.715522	0.00150651		0.712721	0.00143026		0.707527	0.00207071		0.716254	0.00130126		0.708722	0.00210348		0.711554	0.00145304		0.715388	0.00143944		0.713665	0.00142885		0.720451	0.000950154		0.711649	0.00208218		0.716899	0.00116057		0.713693	0.001497		0.712656	0.0014134		0.716448	0.00182071
0.725454	0.00131618		0.722636	0.00222207		0.719898	0.00127991		0.720846	0.00164122		0.715652	0.00118065		0.720317	0.00090538		0.715911	0.0026531		0.717181	0.000820698		0.719451	0.00133005		0.718044	0.00123679		0.724201	0.000995956		0.719149	0.00172159		0.724712	0.00170638		0.721192	0.00160802		0.719843	0.00166636		0.720819	0.00153305
0.729828	0.00268822		0.728571	0.00272764		0.726461	0.00135898		0.72772	0.001449		0.721277	0.001525		0.726257	0.00137514		0.722785	0.00217554		0.725306	0.00101021		0.726014	0.00109979		0.725231	0.00128957		0.730762	0.00199606		0.726648	0.00131663		0.732211	0.00183601		0.729005	0.00134447		0.727656	0.00135053		0.726763	0.00129066
0.733891	0.00209252		0.732321	0.00315412		0.734584	0.0014648		0.732096	0.00143234		0.725652	0.00201905		0.734069	0.000842058		0.727473	0.00185469		0.731867	0.00161759		0.73414	0.000633059		0.733043	0.00144078		0.738887	0.00160665		0.731333	0.00190863		0.736587	0.00100471		0.733689	0.00107452		0.732657	0.00126928		0.734575	0.00116691
0.741079	0.00220579		0.737322	0.00259728		0.740211	0.00140566		0.737093	0.000932687		0.73159	0.0012575		0.74063	0.000508154		0.732472	0.00180039		0.735617	0.00244777		0.739764	0.00107045		0.738353	0.00104863		0.744823	0.00152145		0.735086	0.00168912		0.740649	0.00126567		0.737443	0.00159522		0.737032	0.000782822		0.741136	0.000950522
0.748266	0.00220445		0.744822	0.00216505		0.744274	0.000889383		0.745218	0.00176961		0.739713	0.00140511		0.745006	0.000990484		0.739661	0.00214209		0.740618	0.00185634		0.743514	0.00122726		0.74242	0.000890535		0.74826	0.0011245		0.74196	0.00097478		0.747524	0.00128893		0.744004	0.00173671		0.744219	0.00132423		0.745508	0.0014887
0.753266	0.00124169		0.751383	0.00201032		0.750835	0.000983799		0.752096	0.00146473		0.745963	0.00136647		0.750316	0.00103652		0.747473	0.002037		0.748118	0.00176828		0.749139	0.000340624		0.749607	0.000799898		0.753887	0.00170843		0.74946	0.000276222		0.75471	0.000691307		0.751504	0.00180712		0.752345	0.00187398		0.750818	0.00114067
0.757954	0.00151698		0.756072	0.00225586		0.75896	0.00147705		0.756159	0.0011691		0.750339	0.00123608		0.758441	0.00106997		0.752473	0.00169674		0.754992	0.00154086		0.756952	0.000487133		0.757732	0.000310919		0.761386	0.00122968		0.754457	0.000597033		0.760024	0.000832149		0.756814	0.00227154		0.757033	0.00109929		0.758631	0.000739708
0.764516	0.0020954		0.761385	0.00286857		0.764585	0.00121372		0.760843	0.00219986		0.755964	0.00137508		0.765319	0.00161698		0.756535	0.00198724		0.75968	0.00171928		0.762889	0.000962802		0.762729	0.000770298		0.767947	0.00120649		0.759149	0.000957859		0.764709	0.000785413		0.761193	0.00213336		0.760783	0.000957091		0.765512	0.000980241
0.772329	0.00122883		0.768572	0.00261383		0.768335	0.000991477		0.76803	0.00154731		0.764089	0.00114832		0.769069	0.000992281		0.763722	0.00196949		0.764677	0.00142137		0.767265	0.00031653		0.76617	0.00107502		0.772323	0.00149638		0.765398	0.000679351		0.770961	0.000935559		0.767754	0.00183538		0.767344	0.000959657		0.769884	0.00103736
0.778266	0.000780953		0.776072	0.00165902		0.77396	0.000872367		0.775221	0.00148138		0.770652	0.00104732		0.773753	0.000964437		0.771535	0.00191044		0.771868	0.000624248		0.772889	0.000431366		0.772731	0.00106814		0.777637	0.00135822		0.77321	0.000834154		0.778774	0.00126271		0.775567	0.000555138		0.774844	0.000692801		0.775194	0.00121799
0.782329	0.000991742		0.781073	0.00195009		0.781772	0.00045818		0.779905	0.000867685		0.774089	0.000686176		0.781253	0.000563168		0.776848	0.00198931		0.779368	0.000998659		0.780702	0.000594586		0.780231	0.0015188		0.785449	0.000835743		0.779459	0.00142638		0.785022	0.00149195		0.781815	0.000960179		0.78047	0.000246543		0.783007	0.00104966
0.788578	0.00197484		0.785761	0.00225701		0.788022	0.000902663		0.784594	0.001127		0.779401	0.00120438		0.788131	0.000449771		0.781222	0.00162902		0.784678	0.00113271		0.787889	0.000390561		0.785854	0.00178864		0.792636	0.00118821		0.783831	0.00197288		0.789085	0.00120773		0.785874	0.00107937		0.784846	0.00081233		0.790193	0.00088412
0.796704	0.00235822		0.792948	0.00174983		0.792398	0.000907021		0.791468	0.00117395		0.786901	0.00120921		0.792819	0.000875515		0.788098	0.00198084		0.789053	0.00138809		0.792264	0.00127953		0.790233	0.00120696		0.797324	0.000899263		0.789461	0.00132463		0.795024	0.000815654		0.791818	0.000498851		0.790781	0.00123721		0.79426	0.00132084
0.802953	0.00150239		0.800761	0.00182915		0.798023	0.001625		0.799593	0.00156026		0.793464	0.00151576		0.797504	0.00046796		0.796223	0.00204092		0.795618	0.00110336		0.796952	0.00100127		0.796482	0.00100802		0.802013	0.00123345		0.797274	0.00138614		0.803149	0.00060989		0.79963	0.000707001		0.798594	0.0014598		0.798632	0.00124167
0.807016	0.000861967		0.805758	0.0024752		0.805835	0.00148099		0.804907	0.0014069		0.798152	0.000993149		0.804691	0.00062694		0.801535	0.0012547		0.80374	0.00127739		0.804765	0.000652101		0.804294	0.00126341		0.809512	0.000893043		0.804148	0.000821578		0.809398	0.000897494		0.806504	0.00164709		0.805155	0.00124875		0.805506	0.000647767
0.812953	0.000984447		0.810133	0.00237818		0.813022	0.00168995		0.80897	0.000815638		0.803151	0.000647962		0.812503	0.000595503		0.804972	0.00110295		0.809367	0.00131783		0.812265	0.000479943		0.810856	0.00130035		0.817012	0.000887011		0.808206	0.000580341		0.813461	0.000970241		0.810563	0.00108886		0.809218	0.000517462		0.8127	0.000692576
0.821079	0.00100595		0.81732	0.00214068		0.817397	0.00178043		0.815531	0.000968541		0.810338	0.000607648		0.817817	0.00104348		0.811223	0.00148078		0.813429	0.000840806		0.816951	0.000459735		0.814922	0.0017104		0.822013	0.00118821		0.813837	0.000624472		0.819396	0.000681156		0.815881	0.00122285		0.814845	0.000947255		0.81801	0.00121776
0.827329	0.00158552		0.825133	0.00191146		0.822086	0.00167833		0.823656	0.0012496		0.818151	0.00111283		0.822192	0.000746849		0.818722	0.00192489		0.820303	0.00143894		0.821639	0.000569132		0.820232	0.00122532		0.826385	0.000918676		0.821962	0.0014209		0.827522	0.000712243		0.823998	0.00137272		0.822657	0.000808053		0.822382	0.000802627
0.831079	0.00165194		0.830134	0.00220046		0.829898	0.000942505		0.829596	0.00179413		0.823152	0.00157245		0.828754	0.000944003		0.82466	0.00185304		0.828429	0.00159448		0.829139	0.000739929		0.828357	0.000851297		0.833576	0.000996521		0.828524	0.00162669		0.834087	0.000817557		0.83088	0.00160979		0.829531	0.000665003		0.829256	0.00100949
0.836079	0.000957762		0.833884	0.00207722		0.837398	0.000782931		0.833658	0.0013368		0.827525	0.00149686		0.836879	0.00123165		0.829035	0.00193088		0.834055	0.00119511		0.836951	0.0012257		0.835231	0.00119503		0.841701	0.00103648		0.83227	0.00145382		0.837524	0.000688347		0.834626	0.00122461		0.833907	0.00157548		0.837068	0.00107427
0.843579	0.00103666		0.840136	0.00253106		0.842084	0.00123094		0.839907	0.000762666		0.834401	0.00129613		0.842193	0.000745277		0.83466	0.00152269		0.837492	0.000539428		0.841014	0.00110931		0.839603	0.00152683		0.846385	0.000845921		0.837274	0.00121807		0.842525	0.000628288		0.839318	0.000603699		0.83922	0.000950249		0.843012	0.00107218
0.850454	0.00136014		0.847636	0.00283385		0.846773	0.00102572		0.848345	0.00137243		0.842214	0.000822655		0.846255	0.00047537		0.842473	0.00129806		0.843741	0.00156189		0.845077	0.00106054		0.844608	0.00082032		0.849822	0.00107983		0.844774	0.00068278		0.850337	0.000546659		0.846818	0.000455147		0.847346	0.000897647		0.847071	0.00142648
0.855141	0.00108888		0.853571	0.00203216		0.854272	0.00108237		0.853968	0.00129979		0.847526	0.00127976		0.85313	0.000456283		0.849347	0.00141967		0.851241	0.00100213		0.851951	0.00131761		0.852733	0.000843037		0.856387	0.000205072		0.851335	0.00126175		0.856899	0.000660009		0.853692	0.00128951		0.85422	0.00122972		0.853319	0.00132363
0.860141	0.000867342		0.857634	0.00162361		0.862085	0.00161732		0.857409	0.001452		0.851901	0.00150694		0.861255	0.00155949		0.853722	0.00162324		0.85718	0.000636498		0.859452	0.00020383		0.85992	0.00107273		0.8642	0.000353598		0.85602	0.00125397		0.861587	0.00109015		0.858376	0.000984901		0.858283	0.00115274		0.861444	0.00130436
0.867329	0.00133768		0.863574	0.00207194		0.86646	0.000909719		0.863031	0.00217141		0.859088	0.00139734		0.866882	0.00115194		0.858723	0.00135298		0.861556	0.00030392		0.864452	0.000368216		0.863979	0.00186895		0.86951	0.000161532		0.861025	0.000777217		0.866584	0.000751366		0.863061	0.000668152		0.862971	0.00163578		0.867388	0.00132943
0.875141	0.00145306		0.871699	0.00176731		0.87021	0.00126705		0.870844	0.00120657		0.866901	0.00112711		0.870319	0.00110096		0.866536	0.00157885		0.867178	0.000358926		0.868827	0.00100613		0.868358	0.0016333		0.873885	0.0006793		0.868212	0.0013818		0.873775	0.000793449		0.870255	0.000744745		0.870158	0.00140955		0.871446	0.00109819
0.880141	0.00156863		0.87826	0.0015305		0.877086	0.000777328		0.877096	0.000814713		0.871902	0.00114601		0.876254	0.000579111		0.873723	0.00160672		0.874991	0.00164024		0.875388	0.00106792		0.875545	0.000956619		0.880138	0.000603341		0.876024	0.00132463		0.881587	0		0.877755	0.00100719		0.877032	0.000998146		0.877382	0.0014093
0.884516	0.00148301		0.882323	0.00176938		0.884899	0.0007655		0.881468	0.000906316		0.875652	0.00108973		0.884067	0.000168187		0.878411	0.00206715		0.881865	0.00146413		0.883514	0.000520554		0.882732	0.00117025		0.888263	0.000529266		0.881021	0.000859764		0.886585	0.000465242		0.883378	0.00134889		0.882033	0.000984889		0.88582	0.00120638
0.891391	0.00100883		0.887633	0.00212114		0.890211	0.000931922		0.886782	0.00100139		0.881902	0.00118422		0.890006	0.00018166		0.883097	0.00117232		0.886553	0.00139895		0.889451	0.000545232		0.887729	0.00131687		0.894512	0.000498355		0.885393	0.0011289		0.890647	0.000868945		0.887437	0.00152216		0.886721	0.000630791		0.891756	0.00170462
0.899516	0.000663657		0.895758	0.00254877		0.894273	0.00135566		0.894594	0.00103609		0.889402	0.000672108		0.894382	0.000753586		0.89091	0.000995583		0.891554	0.000923777		0.893514	0.000742455		0.892109	0.000720964		0.898574	0.000657059		0.891962	0.00153111		0.897834	0.00128428		0.894006	0.00099991		0.893595	0.000758018		0.89551	0.000999511
0.904828	0.000760796		0.902949	0.0017365		0.900834	0.00120812		0.901781	0.00125908		0.895339	0.000356106		0.900005	0.000966907		0.89841	0.000985466		0.899054	0.000722705		0.899451	0.00135919		0.898983	0.000602792		0.904201	0.000763365		0.900087	0.00148995		0.905647	0.00112441		0.902123	0.00125309		0.901408	0.000750962		0.90082	0.0012946
0.908891	0.000564022		0.90732	0.00226598		0.90896	0.000611943		0.906469	0.0012489		0.899715	0.0010005		0.907817	0.00104954		0.902785	0.00108808		0.906554	0.00112138		0.907577	0.000718944		0.906795	0.000863		0.912013	0.000759218		0.90571	0.000673177		0.91096	0.00085393		0.908067	0.000858201		0.907031	0.00118204		0.908319	0.00149938
0.916079	0.0011793		0.912322	0.00296651		0.914897	0.00100102		0.911158	0.00110595		0.90565	0.00178809		0.915004	0.000644679		0.906848	0.00153075		0.911242	0.00148424		0.913827	0.000501706		0.912418	0.00137424		0.918887	0.000905106		0.909769	0.00111655		0.915023	0.000440922		0.912126	0.00106414		0.911093	0.000542694		0.914881	0.00158018
0.924203	0.00110885		0.920134	0.00225402		0.91896	0.000706152		0.918657	0.00121259		0.913463	0.00156951		0.919379	0.000444382		0.913724	0.00126131		0.91593	0.000851437		0.918201	0.000566605		0.916484	0.00159314		0.92295	0.00112639		0.916643	0.00108134		0.92221	0.000445575		0.918374	0.00107099		0.917658	0.000561938		0.919573	0.00129553
0.929203	0.00178364		0.927321	0.00218505		0.924898	0.00124277		0.926157	0.000988898		0.920339	0.00052345		0.92438	0.000228815		0.921223	0.000690012		0.92343	0.00146783		0.923827	0.000782094		0.923046	0.00108994		0.92826	0.00093696		0.924768	0.00102394		0.930022	0.000723028		0.926499	0.000871886		0.925784	0.00102765		0.92457	0.000501032
0.932953	0.00179804		0.931384	0.0024545		0.933023	0.00107822		0.931158	0.00142054		0.924402	0.00129088		0.932193	0.000312123		0.926223	0.00168229		0.931242	0.00145512		0.931951	0.000541734		0.931171	0.000922889		0.936385	0.000773166		0.930086	0.00085359		0.935336	0.000865562		0.93213	0.000772999		0.931719	0.00151711		0.93207	0.00053818
0.939204	0.00164714		0.935759	0.00310078		0.939586	0.00104647		0.935534	0.00120079		0.929714	0.00147608		0.93938	0.000944677		0.930598	0.00147624		0.935305	0.000478876		0.938514	0.000763246		0.937107	0.000661993		0.943572	0.000904352		0.933832	0.000508541		0.938773	0.000599528		0.935876	0.000976071		0.935782	0.00125474		0.939569	0.000948665
0.946703	0.000663081		0.942946	0.00321228		0.943647	0.000414187		0.943033	0.000996994		0.937526	0.0010933		0.944068	0.000774469		0.937161	0.00109778		0.939368	0.000596745		0.941951	0.00117887		0.941166	0.0011886		0.947322	0.000825		0.939768	0.000187044		0.945022	0.00110601		0.941499	0.000846944		0.94203	0.00101504		0.944261	0.000645909
0.952641	0.000755229		0.950133	0.00375901		0.949273	0.000868424		0.950846	0.00140921		0.944713	0.000652161		0.949069	0.000809723		0.945285	0.000827932		0.946555	0.00093695		0.946952	0.00082834		0.947422	0.00140475		0.951698	0.000903975		0.947267	0.000318067		0.952834	0.00123924		0.949311	0.00119018		0.950156	0.00141618		0.948946	0.000827005
0.957016	0.000966593		0.955134	0.00298168		0.957397	0.00124526		0.955221	0.000988204		0.949088	0.00108868		0.956569	0.000513543		0.950909	0.00119069		0.953741	0.000881713		0.954452	0.000551061		0.955547	0.00088847		0.959197	0.00115523		0.953211	0.000909841		0.958461	0.000559771		0.955254	0.00116193		0.956095	0.00110677		0.956133	0.000989528
0.962954	0.00135361		0.959509	0.00285041		0.96396	0.00121227		0.959284	0.00123178		0.95409	0.00109246		0.964069	0.000779409		0.955285	0.00119482		0.959055	0.000807756		0.961326	0.000763829		0.961483	0.00155092		0.966388	0.000673646		0.957582	0.00103835		0.962837	0.000293525		0.959626	0.000995716		0.959532	0.000898289		0.963945	0.000416057
0.970766	0.000940101		0.966383	0.00298306		0.96771	0.00127763		0.965845	0.000971549		0.961902	0.000889635		0.968444	0.0010592		0.961222	0.00112008		0.963431	0.000753674		0.966014	0.000797639		0.965229	0.00176593		0.971072	0.000641227		0.963205	0.000823178		0.968772	0.000663393		0.965249	0.000733047		0.965155	0.00100435		0.96895	0.000797055
0.977641	0.000686886		0.974509	0.00306514		0.972711	0.000697852		0.973345	0.0016558		0.969402	0.00066077		0.972507	0.000513543		0.969348	0.00132304		0.969992	0.00127045		0.971013	0.000825425		0.970859	0.00171521		0.975761	0.000894739		0.971018	0.000751607		0.976585	0.00147926		0.973062	0.00130893		0.972968	0.00137299		0.973322	0.000845579
0.982016	0.0011004		0.980135	0.00297663		0.980211	0.000488268		0.978659	0.0016942		0.973152	0.00137298		0.979381	0.000466837		0.975598	0.00149441		0.978117	0.00140543		0.978202	0.00107414		0.978359	0.00113032		0.982948	0.000863827		0.978212	0.000680494		0.98315	0.00110241		0.980248	0.00141025		0.978907	0.000910049		0.980509	0.000911749
0.987016	0.00167172		0.984198	0.00206504		0.987085	0.000561311		0.98303	0.00121767		0.977527	0.00165308		0.98688	0.000420804		0.979973	0.000946444		0.98374	0.000836877		0.985702	0.000301179		0.98492	0.00124344		0.99076	0.000427296		0.982584	0.00143507		0.987834	0.000801485		0.984628	0.00206207		0.983283	0.000756949		0.988321	0.000593206
0.994828	0.00127836		0.990447	0.00217907		0.99146	0.00128469		0.989595	0.0010539		0.984714	0.00117015		0.992191	0.000693182		0.985598	0.000861793		0.987803	0.000784413		0.991014	0.000471783		0.989292	0.00111128		0.996074	0.00109811		0.987268	0.000926761		0.992835	0.000908491		0.989625	0.0021316		0.988905	0.000262152		0.993006	0.000774534
1.00202	0.00101747		0.998572	0.00249014		0.996459	0.000845183		0.997408	0.00111983		0.991901	0.00106034		0.996566	0.00139355		0.994034	0.00175311		0.994055	0.00128016		0.995076	0.000308174		0.994609	0.00125239		1.00014	0.00112168		0.995081	0.00070839		1.00065	0.00129274		0.997125	0.00154291		0.996405	0.000407983		0.996759	0.000893175
1.00639	0.00104569		1.00451	0.00264763		1.00396	0.000628337		1.00366	0.00124751		0.996902	0.0010679		1.00313	0.00165133		1.00028	0.00217265		1.00218	0.000818618		1.00195	0.000216266		1.00211	0.00138755		1.0067	0.000505894		1.00258	0.00110695		1.00783	0.000813116		1.00462	0.00150406		1.0036	0.000518104		1.00332	0.000696059
1.01139	0.000716642		1.00857	0.00145164		1.01146	0.000243823		1.00803	0.00145038		1.00159	0.00113803		1.01126	0.00158576		1.00403	0.00176178		1.00843	0.000738651		1.01008	0.000608188		1.0093	0.00169387		1.01482	0.000710401		1.00727	0.00102348		1.01221	0.000679888		1.00932	0.0013906		1.00828	0.00095645		1.01082	0.000915696
1.0192	0.000471298		1.01482	0.00166753		1.01646	0.00060053		1.01366	0.00122299		1.00846	0.00155523		1.01719	0.000330985		1.00904	0.00105298		1.01249	0.000830868		1.01539	0.0004541		1.01398	0.00179254		1.02076	0.00093319		1.01196	0.000602749		1.01721	0.000864927		1.014	0.00139767		1.01297	0.00108432		1.01644	0.000867868
1.02639	0.00121328		1.02295	0.00245588		1.02084	0.00151191		1.02147	0.00171293		1.01628	0.00103325		1.02125	0.000490639		1.01654	0.00102924		1.01812	0.000856984		1.01976	0.000316724		1.01866	0.000514909		1.02483	0.00103629		1.01977	0.000813117		1.02502	0.00100154		1.0215	0.00126126		1.02047	0.00104583		1.02082	0.000643356
1.03045	0.00136686		1.0292	0.00275339		1.02771	0.00135773		1.02835	0.00135947		1.0219	0.00108554		1.02719	0.000372975		1.0231	0.00145621		1.02624	0.000809374		1.02664	0.000774322		1.02616	0.000983007		1.03107	0.000522669		1.02727	0.00114536		1.03252	0.00121915		1.029	0.00156211		1.02797	0.000579045		1.02676	0.000643123
1.03483	0.00150758		1.03263	0.00200687		1.03583	0.000625224		1.03272	0.00138538		1.02596	0.0014366		1.03532	0.000436747		1.02778	0.00119957		1.0328	0.000411158		1.03445	0.000804245		1.03398	0.00216702		1.0392	0.000488365		1.03134	0.00133195		1.03659	0.000731276		1.03338	0.00125839		1.03297	0.000843121		1.03488	0.00153769
1.04202	0.00086619		1.03795	0.00234415		1.04115	0.000783553		1.03803	0.00175226		1.03253	0.00118212		1.04157	0.000435175		1.03279	0.00154231		1.03655	0.000600443		1.03976	0.000791033		1.03867	0.00153669		1.04483	0.00127755		1.03539	0.000938423		1.04065	0.000724931		1.03713	0.0012511		1.03734	0.000789023		1.04144	0.00122286
1.0492	0.00143463		1.04576	0.00250531		1.04521	0.000323921		1.04616	0.00216609		1.04034	0.00119493		1.04594	0.000528139		1.03997	0.00165875		1.04156	0.000723629		1.0432	0.000971934		1.04304	0.000855198		1.04858	0.000947892		1.04227	0.000997646		1.04784	0.000561674		1.044	0.00135374		1.04453	0.00104412		1.04551	0.000752477
1.0542	0.00113035		1.05201	0.00224322		1.05209	0.000431203		1.05303	0.00182142		1.04659	0.00167932		1.05157	0.000775591		1.04779	0.00116798		1.04906	0.000826707		1.04945	0.00124105		1.05023	0.00123886		1.0542	0.000827827		1.04977	0.000606179		1.05502	0.000623424		1.0515	0.00130606		1.05266	0.00166636		1.05082	0.00117736
1.05889	0.000920135		1.05638	0.00288443		1.06021	0.00134984		1.05678	0.00128314		1.05065	0.000984751		1.05969	0.000753136		1.05278	0.00145208		1.05593	0.00110405		1.05695	0.000695627		1.05835	0.00108351		1.06201	0.000836497		1.05477	0.00120436		1.06034	0.000270686		1.05682	0.00110365		1.05734	0.000770206		1.05895	0.00133082
1.06577	0.000998077		1.0617	0.00291041		1.06552	0.000946655		1.06147	0.00107981		1.0569	0.00122684		1.06594	0.000501193		1.05716	0.00204402		1.0603	0.000878709		1.06289	0.000372491		1.06305	0.00152935		1.06826	0.000923766		1.05914	0.00137562		1.06471	0.000492311		1.06119	0.0010988		1.06109	0.00128211		1.06582	0.00103805
1.07358	0.000623342		1.0692	0.00322861		1.06896	0.000367706		1.06897	0.00155147		1.06503	0.000575313		1.06969	0.000591461		1.06404	0.00161209		1.06531	0.000893732		1.06726	1.02984e-05		1.06679	0.00126708		1.07264	0.000711908		1.06571	0.00159628		1.07127	0.000797679		1.06775	0.00138177		1.06766	0.00171703		1.0702	0.000942628
1.0792	0.00101209		1.07638	0.00298467		1.07521	0.000379534		1.07585	0.00132987		1.07096	0.000916091		1.07469	0.000827462		1.07185	0.00144031		1.07281	0.00105066		1.07289	0.000780151		1.07335	0.00153968		1.07795	0.000371316		1.07383	0.000715936		1.0794	0.000255883		1.07556	0.00140672		1.07547	0.0013717		1.0752	0.000720205
1.08327	0.00155538		1.08107	0.00348151		1.08271	0.000868632		1.08053	0.00096484		1.07471	0.00121677		1.08219	0.000585399		1.07716	0.00182372		1.08031	0.000907136		1.0807	0.0015261		1.08116	0.00151994		1.08576	0.000431442		1.07977	0.000743376		1.08502	0.000657683		1.08181	0.00132703		1.08078	0.000827726		1.08332	0.0013631
1.08952	0.00141178		1.08576	0.00284374		1.08865	0.000613189		1.08522	0.00155887		1.08003	0.0014851		1.08907	0.000728212		1.08154	0.00181608		1.0853	0.000965378		1.08758	0.0010312		1.08648	0.000826745		1.09295	0.000727364		1.08383	0.00116686		1.08908	0.00121344		1.08588	0.00143961		1.08516	0.0012124		1.09051	0.00150542
1.09795	0.00100115		1.09326	0.00236507		1.09334	0.000318319		1.09241	0.00142262		1.08753	0.000863389		1.09375	0.000982625		1.08841	0.0012514		1.08968	0.000786031		1.09195	0.000297487		1.09085	0.000830416		1.09732	0.00139441		1.08977	0.000693756		1.09534	0.000658317		1.09181	0.00167446		1.09109	0.00089893		1.09426	0.0011156
1.10389	0.00122538		1.10107	0.00286328		1.09896	0.00045984		1.10022	0.00118182		1.09409	0.000558095		1.09875	0.00102641		1.09654	0.00148037		1.09687	0.00147083		1.09726	0.00115342		1.0971	0.000615412		1.10201	0.00102574		1.09758	0.0007699		1.10346	0.000212531		1.09963	0.000819353		1.09922	0.00085702		1.09895	0.000976294
1.10795	0.00092455		1.10607	0.00219586		1.10677	0.00148908		1.10553	0.00113023		1.09878	0.000609957		1.10594	0.000677014		1.10153	0.000972252		1.10468	0.00194231		1.10508	0.000835724		1.10492	0.000802422		1.10982	0.000999725		1.10414	0.00145863		1.1094	0.000771879		1.10619	0.00122682		1.10547	0.000578831		1.10613	0.0011495
1.11389	0.000902857		1.11045	0.00182547		1.11365	0.000830865		1.10991	0.00152441		1.10409	0.00092323		1.11344	0.000113622		1.10528	0.00154499		1.10999	0.00194855		1.11226	0.000564662		1.11117	0.00107663		1.11732	0.00117125		1.10852	0.00133698		1.11346	0.00128026		1.11057	0.00133586		1.10953	0.000771061		1.11332	0.00131202
1.12233	0.000971008		1.11764	0.00206665		1.11802	0.000848296		1.11647	0.00138446		1.11159	0.00111997		1.11844	0.000301794		1.11153	0.00145394		1.11437	0.00155011		1.11664	0.000357917		1.11554	0.00103877		1.12201	0.0012587		1.11415	0.000631561		1.1194	0.00161079		1.11619	0.00154467		1.11516	0.00168774		1.11801	0.000940306
1.12827	0.000731808		1.12576	0.0027097		1.12302	0.00119235		1.12459	0.000678696		1.11878	0.00131818		1.12313	0.00032088		1.11903	0.00127844		1.12124	0.00143894		1.12164	0.000724579		1.12085	0.00166244		1.12639	0.000608996		1.12227	0.000522718		1.12784	0.00112144		1.124	0.00131335		1.12328	0.00189387		1.1227	0.000650089
1.13202	0.00085256		1.13045	0.00293065		1.13084	0.00107884		1.13022	0.0012762		1.12346	0.00124406		1.13	0.000427541		1.12497	0.0017721		1.12937	0.00144333		1.12945	0.000887604		1.12898	0.00156859		1.13389	0.0006482		1.12883	0.000851303		1.13377	0.000780761		1.13056	0.00132659		1.13016	0.00124683		1.12957	0.000577418
1.13733	0.000810902		1.1342	0.00246968		1.13802	0.00114213		1.13428	0.0015325		1.12784	0.00151324		1.13782	0.000597973		1.12935	0.000686915		1.13468	0.001227		1.13664	0.00153815		1.13585	0.00133156		1.1417	0.000622189		1.13259	0.00137859		1.13752	0.000832783		1.13432	0.00136014		1.13422	0.00111062		1.13738	0.000657982
1.14483	0.000403723		1.14076	0.00255865		1.14271	0.00100663		1.14084	0.00134745		1.13534	0.000876827		1.14313	0.000638168		1.13497	0.000774457		1.13843	0.00051909		1.14101	0.00112738		1.13992	0.00155207		1.14608	0.00106815		1.13758	0.00158873		1.14252	0.000991388		1.13931	0.00144424		1.13953	0.00117712		1.14301	0.000855099
1.15139	0.00018276		1.14826	0.00254394		1.1474	0.000849748		1.14897	0.00085797		1.14315	0.00115839		1.14751	0.0010309		1.14278	0.000875626		1.14468	0.00069497		1.14508	0.000528327		1.14523	0.000877914		1.14983	0.00136275		1.14508	0.00138637		1.15034	0.000474758		1.14681	0.00124161		1.14766	0.00129366		1.14707	0.000594599
1.15608	0.00121443		1.15357	0.00252762		1.15552	0.000544296		1.1546	0.000665973		1.14815	0.0014723		1.15438	0.00122222		1.14966	0.000989389		1.15218	0.0010985		1.15195	0.000190423		1.15335	0.00139787		1.1567	0.000857796		1.15164	0.00126929		1.1569	0.000235793		1.15369	0.00221327		1.15453	0.000831361		1.15363	0.00114648
1.16108	0.00085544		1.15795	0.00336862		1.16302	0.000757615		1.15835	0.00105991		1.15221	0.00172216		1.16251	0.00125029		1.15372	0.0009642		1.15812	0.00131645		1.15945	0.000598278		1.16023	0.0015165		1.16389	0.000675154		1.15634	0.000615783		1.16127	0.00107852		1.15807	0.00165923		1.15828	0.000380826		1.16176	0.00116343
1.16858	0.000495679		1.1642	0.00256831		1.16709	0.00125398		1.16397	0.00107426		1.1594	0.00132952		1.16751	0.000777837		1.15904	0.00139303		1.16249	0.000995192		1.16445	0.000658902		1.16429	0.000995169		1.1692	0.00133466		1.16133	0.00117943		1.16659	0.00104087		1.16306	0.00104781		1.16297	0.000888239		1.16738	0.00106057
1.17608	0.000797655		1.17201	0.0019963		1.17115	0.000900173		1.17178	0.00121675		1.16753	0.000555576		1.17126	0.000908075		1.16685	0.00160507		1.16843	0.000532495		1.16883	0.000789089		1.16867	0.00131802		1.17358	0.00130488		1.16852	0.0013276		1.17377	0.000262439		1.17025	0.00156653		1.17047	0.00121133		1.17145	0.00173759
1.18077	0.00138932		1.17857	0.0027635		1.17833	0.000689137		1.17772	0.00132131		1.17221	0.000499724		1.1775	0.00072911		1.17403	0.00158443		1.17624	0.00067833		1.17539	0.000508701		1.17617	0.000804258		1.18014	0.00117125		1.17633	0.00165505		1.18127	0.000517264		1.17806	0.00168991		1.17734	0.00110463		1.1777	0.00111397
1.18545	0.0011196		1.18263	0.00322585		1.18583	0.000140899		1.18209	0.00106755		1.17628	0.00130432		1.185	0.000661745		1.17872	0.00137589		1.18312	0.000866229		1.18351	0.00112136		1.18335	0.000813895		1.18795	0.00087721		1.18134	0.0015757		1.18627	0.000686866		1.18307	0.00168197		1.18203	0.000901924		1.18614	0.000913607
1.19264	0.00112305		1.18826	0.00287685		1.19084	0.000659048		1.18741	0.00131252		1.18284	0.00217044		1.19094	0.000747523		1.18372	0.00117645		1.18749	0.00119927		1.18914	0.000397168		1.18805	0.000881127		1.1942	0.00097428		1.18571	0.00141495		1.19065	0.00116522		1.18744	0.00122881		1.18672	0.000502067		1.19176	0.000556058
1.20045	0.00158014		1.19607	0.0030433		1.19521	0.00065386		1.19522	0.001065		1.19034	0.00143198		1.19532	0.000257782		1.19153	0.00135649		1.1928	0.000948044		1.19351	0.000800554		1.19273	0.00118378		1.19826	0.00104967		1.19258	0.00156793		1.19784	0.000814808		1.19431	0.000872328		1.19391	0.000204419		1.1952	0.000984652
1.20545	0.000586099		1.20295	0.00236507		1.20208	0.000518979		1.20241	0.000874162		1.19596	0.00107609		1.20094	0.000527465		1.19872	0.00124334		1.20062	0.00074859		1.19976	0.00113088		1.19992	0.00136093		1.2042	0.00101895		1.20071	0.0017193		1.20565	0.000946133		1.20244	0.00057677		1.20141	0.000781325		1.20082	0.00113092
1.20983	0.000160299		1.20732	0.00259843		1.21021	0.000454652		1.20709	0.0012917		1.20034	0.00161717		1.20875	0.000943554		1.20279	0.00101458		1.20749	0.000911759		1.20758	0.000908395		1.20742	0.00159681		1.21201	0.000752244		1.20602	0.0011385		1.21065	0.00118129		1.20775	0.000668373		1.20672	0.00112302		1.20832	0.00100949
1.21702	0.00159454		1.21263	0.00285248		1.21615	0.00125916		1.21178	0.00109531		1.20628	0.00107987		1.21563	0.00102664		1.20685	0.000850231		1.21187	0.000790191		1.21383	0.000889742		1.21305	0.00142885		1.21857	0.00102838		1.21008	0.00104155		1.21502	0.001633		1.21182	0.000989536		1.2111	0.000514469		1.21488	0.000904087
1.22514	0.00133614		1.22076	0.00305641		1.22021	0.000817377		1.2196	0.000919733		1.2144	0.00139398		1.22	0.0011919		1.21404	0.00118553		1.21687	0.000961911		1.21789	0.000916751		1.21711	0.000891223		1.22295	0.000962405		1.21696	0.0013523		1.22221	0.00111679		1.21869	0.00115398		1.21766	0.000716322		1.21926	0.000571149
1.22983	0.00108562		1.22763	0.00247083		1.22646	0.000455689		1.22709	0.00153667		1.22065	0.00114013		1.22532	0.00112611		1.22122	0.00160796		1.22468	0.00144171		1.22383	0.000157779		1.22367	0.000905909		1.22857	0.000758841		1.2254	0.000975923		1.23002	0.00117643		1.22682	0.00146565		1.22578	0.00108068		1.22457	0.000346637
1.23358	0.0014878		1.2317	0.00368681		1.23458	0.000932337		1.23178	0.00171895		1.22503	0.000704023		1.23313	0.00120403		1.22622	0.00125924		1.23218	0.00130905		1.23195	0.000219181		1.23179	0.000661763		1.2367	0.00122138		1.23039	0.00169803		1.23502	0.000901935		1.23213	0.00158705		1.23141	0.00146386		1.23207	0.000236354
1.24014	0.000983487		1.23607	0.00436045		1.24052	0.000958276		1.23647	0.00160375		1.23034	0.00118149		1.24032	0.00149302		1.23091	0.000724698		1.23624	0.0010086		1.2382	0.00095911		1.23773	0.00107043		1.24326	0.000893797		1.23415	0.00114147		1.23877	0.000942749		1.23588	0.000880274		1.23547	0.00162723		1.23926	0.00110051
1.24764	0.000776346		1.24357	0.00344449		1.24458	0.000670046		1.24397	0.000851493		1.23846	0.000861079		1.24469	0.000895276		1.23779	0.00175745		1.24062	0.00112785		1.24195	0.00103683		1.24179	0.00158672		1.2467	0.000238622		1.2404	0.000518602		1.24502	0.000874444		1.24181	0.00106436		1.24203	0.000607483		1.24394	0.00108333
1.25327	0.000821268		1.25045	0.00280741		1.25083	0.000765915		1.25147	0.000334722		1.24534	0.00158001		1.24969	0.00101945		1.2456	0.00162283		1.24749	0.000813996		1.24726	0.000700679		1.24804	0.00107571		1.2517	0.000823491		1.2479	0.000987585		1.25284	0.000821363		1.24931	0.00111403		1.25016	0.000221311		1.24864	0.000800305
1.25764	0.000621038		1.25513	0.00169006		1.25896	0.000729601		1.25585	0.000866529		1.2494	0.00113299		1.25751	0.000690263		1.25122	0.00103956		1.25468	0.000351992		1.25476	0.000281554		1.25648	0.000840971		1.2592	0.000473475		1.25352	0.00121739		1.25846	0.000829822		1.25525	0.00159743		1.25578	5.19601e-05		1.25614	0.000672842
1.26358	0.00119984		1.26013	0.00257291		1.2649	0.00159637		1.25991	0.00134976		1.25471	0.000520091		1.26501	0.000226794		1.2556	0.00152827		1.25999	0.000381113		1.26133	0.000286412		1.2621	0.000694117		1.26607	0.000528889		1.25821	0.00157661		1.26284	0.000591069		1.25963	0.00168991		1.25953	0.00130884		1.26364	0.000574632
1.2717	0.00153081		1.26701	0.00273315		1.26865	0.00171672		1.26678	0.00150312		1.26284	0.00112375		1.26907	0.00076616		1.26185	0.00156997		1.26437	0.000925163		1.2657	0.000780734		1.26586	0.000610593		1.27076	0.00104232		1.26383	0.000982555		1.26877	0.000341953		1.26525	0.00184575		1.26516	0.00143606		1.26863	0.000171113
1.27795	0.00151967		1.27451	0.00305801		1.27396	0.000621696		1.27397	0.00151145		1.26971	0.000977821		1.27313	0.0010574		1.26997	0.00182475		1.27124	0.00120528		1.27101	0.00058215		1.27148	0.00131481		1.27576	0.00128038		1.27165	0.000569136		1.2769	0.000676081		1.27306	0.00147492		1.27297	0.000928225		1.27301	0.00053702
1.28233	0.00183816		1.28013	0.00273798		1.28115	0.000725243		1.27928	0.00134143		1.27378	0.000943387		1.28032	0.00130934		1.27591	0.00144486		1.27905	0.00104927		1.27851	0.000536682		1.27929	0.000957308		1.28295	0.000471967		1.27852	0.000882173		1.28346	0.000986524		1.27994	0.000788671		1.27891	0.00160178		1.28051	0.000710454
1.28764	0.00184545		1.2842	0.00330057		1.28802	0.00104294		1.28366	0.000818414		1.27815	0.000865069		1.28751	0.000922671		1.27997	0.0014271		1.28499	0.000896043		1.2857	0.00102595		1.28554	0.000844872		1.29045	0.000160024		1.2829	0.000982326		1.28752	0.0010967		1.28432	0.000876301		1.28328	0.00177498		1.28801	0.000970025
1.29577	0.00123785		1.29076	0.00302767		1.29271	0.000827545		1.29022	0.00126695		1.28565	0.00144038		1.29251	0.00114677		1.28622	0.00160383		1.28905	0.000806369		1.2907	0.00078462		1.28992	0.000840512		1.29576	0.000185846		1.2879	0.0010603		1.29283	0.00120032		1.28963	0.000811848		1.28891	0.0012727		1.2927	0.0012823
1.30264	0.00116087		1.29888	0.00272005		1.29771	0.000736656		1.29835	0.000848254		1.29284	0.00168415		1.29719	0.00164145		1.29435	0.00116344		1.29531	0.00116853		1.29539	0.000587397		1.29523	0.000916005		1.30014	0.000592597		1.29571	0.000908469		1.30065	0.000762362		1.29713	0.000833921		1.29672	0.000969493		1.29676	0.00123795
1.30702	0.00120426		1.30482	0.00218206		1.3049	0.000465442		1.30428	0.00105806		1.29753	0.000653211		1.30376	0.00106256		1.3006	0.000736674		1.30312	0.00110336		1.30226	0.000861373		1.30304	0.000928625		1.3067	0.00121573		1.3029	0.00114239		1.30783	0.00116712		1.30463	0.000746953		1.30359	0.000879258		1.30332	0.000834435
1.31202	0.00127298		1.30889	0.00201883		1.31271	0.000807624		1.30834	0.00163567		1.30221	0.000538778		1.31157	0.000555983		1.30404	0.00107817		1.30937	0.000700517		1.31008	0.001202		1.31023	0.000798062		1.31482	0.00108209		1.30758	0.000638649		1.31221	0.00146107		1.30931	0.00104891		1.30828	0.00114676		1.31082	0.00038541
1.32014	0.00164887		1.31513	0.00204711		1.31771	0.000989402		1.31428	0.00124381		1.3094	0.00169129		1.3175	0.000576866		1.30935	0.00107528		1.31343	0.00143432		1.31539	0.000609159		1.31492	0.000748728		1.32014	0.00119047		1.31227	0.000693985		1.31721	0.000570767		1.314	0.000852241		1.31297	0.00132936		1.31613	0.00037798
1.32733	0.00157669		1.32357	0.00203515		1.32209	0.000321016		1.32241	0.00133935		1.31721	0.00202619		1.32188	0.00123996		1.31716	0.00136206		1.31968	0.00135851		1.31945	0.000141651		1.31961	0.000678973		1.32451	0.00146133		1.32009	0.00100176		1.32502	0.000687078		1.3215	0.00103655		1.32078	0.000917961		1.32051	0.000605047
1.33108	0.00171146		1.3292	0.00173627		1.32896	0.000929847		1.32897	0.00181286		1.32253	0.00072712		1.32782	0.00147349		1.32372	0.00180597		1.3278	0.000951742		1.32664	0.000272227		1.32711	0.00140407		1.33139	0.000874759		1.32759	0.000702445		1.33252	0.00114175		1.329	0.00134072		1.32828	0.00138988		1.32676	0.000860206
1.33577	0.000860047		1.33264	0.002014		1.33677	0.000810944		1.33303	0.000866066		1.3269	0.000743707		1.33594	0.0013675		1.3281	0.00123777		1.33374	0.00102339		1.33476	0.000740512		1.33461	0.00114546		1.33951	0.000690421		1.33164	0.00086731		1.33659	0.000889246		1.33337	0.00157668		1.33297	0.00122245		1.33489	0.00142857
1.34295	0.000717026		1.33857	0.00247543		1.34208	0.00111453		1.33866	0.00148323		1.33346	0.00138075		1.34219	0.000522525		1.33341	0.00097184		1.33749	0.00156282		1.33976	0.000478778		1.3396	0.00125997		1.34483	0.000468574		1.33571	0.000929734		1.34096	0.000946979		1.33744	0.00168881		1.33766	0.00114825		1.34113	0.00119593
1.35014	0.000915144		1.34607	0.00215861		1.34646	0.000667971		1.34678	0.00183484		1.34159	0.00164846		1.34626	0.000571701		1.34091	0.00175848		1.3428	0.00205995		1.34351	0.000325662		1.34398	0.00115235		1.34826	0.000492323		1.3429	0.000427367		1.34815	0.000948248		1.34432	0.00158109		1.34516	0.00084419		1.34519	0.000909427
1.35514	0.00122787		1.35232	0.00176271		1.35365	0.000197963		1.35335	0.00107217		1.34721	0.00130957		1.3525	0.000457855		1.3481	0.00157679		1.35031	0.00143501		1.34976	0.00057671		1.35148	0.00123151		1.3542	0.000557351		1.3504	0.000266618		1.35533	0.000483429		1.35182	0.00136743		1.35266	0.000376978		1.35114	0.000949826
1.35952	0.00125743		1.3567	0.00159718		1.36146	0.000333882		1.3571	0.00107634		1.35159	0.00152437		1.36063	0.00073652		1.3531	0.00164761		1.35687	0.000614542		1.35726	0.000457598		1.35929	0.00153004		1.3617	0.000833104		1.35539	0.000429196		1.36002	0.000885229		1.35681	0.00126435		1.35703	0.000661582		1.35895	0.00181607
1.36639	0.00115665		1.36232	0.00216919		1.36646	0.000380986		1.36209	0.00114643		1.35784	0.00144164		1.36657	0.000770202		1.35747	0.00171987		1.36156	0.000394055		1.3632	0.000808715		1.36398	0.00110692		1.36764	0.000476679		1.35977	0.00109551		1.36471	0.00078922		1.36119	0.000938547		1.36109	0.000503136		1.36582	0.00113185
1.3742	0.00158245		1.36982	0.00221195		1.37021	0.000330146		1.36959	0.00120796		1.36628	0.00105299		1.37032	0.000607404		1.36466	0.00170376		1.36655	0.000315013		1.36726	0.000782483		1.36773	0.000942163		1.37201	0.000360195		1.36633	0.000600005		1.37159	0.00107598		1.36807	0.00137471		1.36797	0.000662009		1.36988	0.00146525
1.37983	0.00153062		1.37701	0.00291731		1.37646	0.000924867		1.37647	0.00122739		1.3719	0.001049		1.37563	0.000770651		1.37247	0.00120948		1.37405	0.000174263		1.3732	0.000205968		1.37461	0.000955931		1.37764	0.000819722		1.37446	0.000514029		1.3794	0.00142279		1.37588	0.00139127		1.37547	0.000491589		1.37551	0.00129043
1.38389	0.00113841		1.38138	0.00225081		1.38396	0.000853069		1.38116	0.000990517		1.37565	0.00126779		1.38313	0.00120515		1.37747	0.00119173		1.38156	0.000630951		1.38133	0.000500929		1.38211	0.00123266		1.38545	0.000590524		1.38008	0.00135344		1.38502	0.001187		1.38181	0.00151929		1.38078	0.000253599		1.38332	0.00133407
1.39045	0.000713762		1.38639	0.00164339		1.3899	0.00060219		1.38584	0.00167338		1.38128	0.0010763		1.38969	0.000937267		1.38185	0.00104617		1.38655	0.00117616		1.38789	0.000538236		1.38742	0.00102569		1.39263	0.000785606		1.38446	0.00192601		1.38909	0.000957976		1.38588	0.00128377		1.38516	0.000950677		1.3902	0.00056372
1.39858	0.000807254		1.39389	0.00174708		1.39427	0.00122368		1.39334	0.00169026		1.38909	0.000708013		1.39438	0.000779409		1.38903	0.00133563		1.39124	0.00114657		1.39195	0.000965911		1.3918	0.000984154		1.39701	0.000672515		1.39071	0.00135321		1.39565	0.00114344		1.39213	0.00163076		1.39141	0.00163214		1.39395	0
1.40452	0.00183758		1.40138	0.00194158		1.40021	0.000693909		1.40084	0.00109808		1.39534	0.000106454		1.39938	0.000673422		1.39716	0.00104596		1.39812	0.00099057		1.39726	0.0011814		1.39836	0.00152981		1.40201	0.000450102		1.39884	0.000876456		1.40346	0.00119313		1.40025	0.00165394		1.39922	0.00126436		1.39864	0.00107218
1.40858	0.00162487		1.40639	0.00244508		1.40802	0.000509227		1.40584	0.000926441		1.39971	0.00085478		1.40688	0.000564066		1.40185	0.000677005		1.40593	0.000819081		1.40539	0.00086759		1.40617	0.00148094		1.40982	0.00067063		1.40477	0.000565478		1.4094	0.000573728		1.4065	0.00196958		1.40547	0.000961795		1.40614	0.000449258
1.41483	0.000843729		1.41076	0.00184226		1.4149	0.000892703		1.41022	0.000997919		1.40503	0.00123335		1.41438	0.000970949		1.4056	0.00116695		1.41124	0.000772164		1.41226	0.000453906		1.41242	0.00185083		1.41701	0.00083367		1.40883	0.000436284		1.41346	0.000981449		1.41056	0.00156984		1.40953	0.00127826		1.41301	0.000696523
1.42327	0.000355729		1.41826	0.00155924		1.41927	0.000985252		1.41709	0.0011381		1.41253	0.000653211		1.41907	0.00107716		1.41216	0.0011558		1.41562	0.000710917		1.41664	0		1.41648	0.00205252		1.4217	0.000624263		1.41477	0.000754123		1.41971	0.00118975		1.4165	0.000748277		1.41516	0.000786885		1.4177	0.000797751
1.42889	0.000827987		1.42607	0.00154476		1.42458	0.00150485		1.42522	0.00105876		1.41971	0.00103661		1.42375	0.000709125		1.41997	0.000918158		1.4228	0.00109157		1.42195	0.00087478		1.42242	0.00147084		1.42639	0.000511549		1.4229	0.000992615		1.42784	0.000992446		1.42463	0.000641885		1.42328	0.000447113		1.42238	0.000997422
1.43233	0.000344595		1.43045	0.00253405		1.4324	0.000827545		1.43053	0.000347907		1.4244	0.00162872		1.43094	0.000973643		1.42529	0.000892969		1.43062	0.00108856		1.42976	0.000842524		1.43023	0.00152407		1.4342	0.000413159		1.42915	0.000691927		1.43377	0.0010138		1.43088	0.000606347		1.42985	0.0006		1.42957	0.00105779
1.43795	0.00059589		1.43451	0.00304951		1.43927	0.000341352		1.43491	0.000684711		1.4294	0.00144584		1.43875	0.000718107		1.42966	0.00109923		1.43562	0.0010324		1.43695	0.000340624		1.43679	0.00106217		1.44139	0.000805774		1.43289	0.000229347		1.43752	0.00123395		1.43462	0.00112131		1.43391	0.000920954		1.43739	0.00032992
1.44577	0.000888075		1.44107	0.00240392		1.44365	0.00108548		1.44147	0.000962758		1.43659	0.000476208		1.44376	0.000518034		1.4356	0.00169055		1.43937	0.0010398		1.44101	0.000948229		1.44117	0.000907744		1.44576	0.00086477		1.43821	0.000474013		1.44315	0.000880153		1.43963	0.00109129		1.43953	0.000682751		1.4427	0.000692576
1.45202	0.000861583		1.44857	0.00281891		1.44896	0.00170012		1.44959	0.00122577		1.4444	0.000588331		1.44813	0.000643108		1.44372	0.00116612		1.44593	0.000899509		1.44539	0.000804829		1.4468	0.00158649		1.44982	0.00104289		1.44571	0.000490934		1.45065	0.000371136		1.44713	0.000749381		1.44797	0.000623734		1.44707	0.000473172
1.45639	0.000261086		1.45388	0.00177191		1.45677	0.000448012		1.45491	0.000748555		1.44909	0.000512322		1.45532	0.000731355		1.44997	0.00114713		1.45343	0.000937413		1.45258	0.000488299		1.45492	0.00175445		1.4567	0.000433139		1.45227	0.000688954		1.45721	0.000439231		1.454	0.000679188		1.45453	0.00117156		1.45363	0.000644981
1.4617	0.000397388		1.45826	0.00213263		1.46396	0.000307113		1.45835	0.00120356		1.45378	0.000864859		1.46344	0.000670727		1.45435	0.00199633		1.45906	0.000705602		1.45945	0.00106598		1.46148	0.00148461		1.4642	0.000159647		1.45696	0.00112455		1.46159	0.000634209		1.45837	0.00106436		1.45828	0.000953884		1.46144	0.000876459
1.46952	0.000674791		1.46451	0.00232645		1.46802	0.000491588		1.46459	0.00125353		1.46128	0.00144857		1.46813	0.000507256		1.45966	0.00208511		1.46343	0.000766848		1.46445	0.00142778		1.46523	0.00147084		1.4692	0.000620682		1.46196	0.00105138		1.4669	0.00055533		1.46338	0.00135065		1.46328	0.000571988		1.46739	0.000286271
1.4767	0.000572661		1.47264	0.00157051		1.4724	0.000542843		1.47209	0.00116355		1.46878	0.000674628		1.47188	0.000778735		1.46779	0.00159248		1.46937	0.000964222		1.46914	0.000865453		1.47023	0.00162137		1.47389	0.000782402		1.46946	0.000286512		1.4744	0.00097299		1.47088	0.0009242		1.47078	0.00097099		1.47144	0.000769194
1.48139	0.000996925		1.47888	0.00179375		1.47959	0.000805964		1.47803	0.000711775		1.47346	0.00118947		1.47844	0.000454711		1.47466	0.00109097		1.47749	0.000917074		1.47601	0.00110484		1.47773	0.0014596		1.48045	0.00104383		1.47696	0.000884002		1.48159	0.000976797		1.47838	0.00071583		1.47734	0.000784105		1.47801	0.000376819
1.48608	0.000765403		1.48295	0.00147119		1.48708	0.000805134		1.48241	0.00055679		1.47721	0.00145991		1.48594	0.0011333		1.47904	0.00154127		1.48405	0.00116622		1.48383	0.000841942		1.48461	0.00129461		1.48826	0.000721898		1.48196	0.00206892		1.48627	0.000913566		1.48338	0.000521366		1.48203	0.001132		1.48613	0.000920572
1.49358	0.000389709		1.48857	0.000687657		1.49209	0.000729808		1.48834	0.0010458		1.48409	0.000323141		1.49157	0.000715637		1.48404	0.00137197		1.48812	0.00212697		1.48945	0.00122279		1.48898	0.000796456		1.4942	0.000888142		1.48633	0.00125169		1.49096	0.00104891		1.48776	0.000943845		1.48703	0.00110891		1.49145	0.00165331
1.50139	0.000403147		1.4967	0.000619374		1.49646	0.00116495		1.49616	0.00127782		1.49159	0.000717041		1.49594	0.000844079		1.49216	0.00132531		1.49374	0.00158223		1.49351	0.000945703		1.49398	0.00138594		1.49826	0.00115994		1.49352	0.000964719		1.49846	0.000667622		1.49463	0.000439033		1.49422	0.000806343		1.4952	0.000910124
1.50608	0.000478017		1.50326	0.00146429		1.50334	0.000937317		1.50303	0.00152741		1.4969	0.00149791		1.50188	0.000210402		1.49935	0.00137837		1.50155	0.00110266		1.50008	0.000712337		1.50117	0.000762267		1.5042	0.000661771		1.50134	0.00106945		1.50596	0.000894111		1.50244	0.000978058		1.50203	0.0015248		1.50082	0.000462492
1.51077	0.0012582		1.50732	0.00121691		1.51146	0.000397587		1.50741	0.000908167		1.50128	0.00114139		1.51001	0.000332108		1.5031	0.00185779		1.50843	0.00149787		1.50789	0.00108697		1.50898	0.000781312		1.51232	0.000777313		1.50633	0.000685524		1.51096	0.00078203		1.50775	0.00150825		1.50703	0.00115125		1.50863	0.000875994
1.51795	0.000207525		1.51295	0.00126036		1.51709	0.00102904		1.51209	0.00149989		1.50753	0.000851211		1.51657	0		1.50747	0.00183239		1.5128	0.000685032		1.51383	0.000522692		1.51398	0.00116956		1.51889	0.00166772		1.51071	0.00091853		1.51533	0.000597413		1.51212	0.00136014		1.51141	0.00105973		1.51489	0.000336421
1.52577	9.54116e-05		1.52107	0.000765596		1.52115	0.00141106		1.51991	0.00165973		1.51534	0.000597149		1.52063	0.000715637		1.51497	0.0016474		1.51812	0.000565314		1.5182	0.000854572		1.51835	0.000947441		1.52295	0.0017842		1.51789	0.000833239		1.52283	0.000849701		1.51931	0.00115221		1.51828	0.00100328		1.51926	0.000554897
1.53045	0.000542137		1.52764	0.00131439		1.5274	0.000755955		1.52741	0.00146704		1.52159	0.00129886		1.52594	0.00152379		1.52185	0.00136578		1.52593	0.000607146		1.52445	0.000916168		1.52492	0.00153211		1.52858	0.00132354		1.52571	0.00115359		1.53065	0.00107492		1.52712	0.000800811		1.52609	0.00133343		1.52457	0.000708596
1.53452	0.000631405		1.5317	0.00146038		1.53552	0.00112532		1.5321	0.00133495		1.52596	0.00156636		1.53407	0.000817582		1.52685	0.00149358		1.5328	0.000536655		1.53258	0.000804051		1.53305	0.00169686		1.5367	0.000719259		1.53071	0.000996045		1.53533	0.00136083		1.53213	0.00131688		1.53141	0.00120706		1.53238	0.00070256
1.54108	0.000798807		1.53638	0.00203653		1.54146	0.000990025		1.53678	0.0010303		1.53159	0.00102464		1.54094	0.000173352		1.53153	0.00146839		1.53687	0.00104026		1.53851	0.000477418		1.53867	0.0014456		1.54326	0.000553769		1.53446	0.00123317		1.53908	0.000586205		1.53587	0.00125817		1.53578	0.00108539		1.53957	0.000994868
1.54858	0.000694181		1.54388	0.00111552		1.54552	0.00058808		1.5446	0.00132061		1.5394	0.00099042		1.54532	0.000891683		1.53841	0.00163522		1.54156	0.00115998		1.54226	0.000402414		1.54242	0.00106011		1.5467	0.00101688		1.54102	0.000779504		1.54565	0.000339838		1.54244	0.00112882		1.54235	0.000968852		1.54395	0.000878316
1.55389	0.000654634		1.55076	0.00150912		1.55177	0.00058559		1.55178	0.00142795		1.54628	0.00168331		1.55063	0.000582479		1.54622	0.00155098		1.54874	0.00189886		1.54758	9.83204e-05		1.5493	0.00110233		1.5517	0.000960709		1.54852	0.000236892		1.55315	0.000532702		1.54994	0.000624006		1.55047	0.000945117		1.54894	0.00134197
1.55827	0.00119735		1.55545	0.00175696		1.5599	0.000826092		1.55616	0.00141638		1.55034	0.00176394		1.55844	0.000441687		1.55185	0.0020275		1.55593	0.00161574		1.55508	0.0008775		1.55773	0.00124138		1.55951	0.000596555		1.55415	0.00128553		1.55846	0.001187		1.55557	0.00126633		1.55578	0.000885887		1.55644	0.00189362
1.56452	0.000709731		1.56013	0.00161235		1.56615	0.00123613		1.56053	0.00126718		1.55596	0.00151828		1.56563	0.00114048		1.55591	0.00190713		1.56062	0.00117962		1.56164	0.00100652		1.56305	0.0019293		1.56607	0.0006793		1.55852	0.00104635		1.56283	0.00114598		1.55994	0.00115508		1.55953	0.00120043		1.56394	0.00119941
1.57264	0.000571509		1.56732	0.00119392		1.56959	0.00105892		1.56741	0.00153944		1.56409	0.00100743		1.56969	0.000658826		1.56247	0.00166309		1.56531	0.00093903		1.56601	0.00068766		1.56648	0.00116428		1.57076	0.000498166		1.56445	0.00131228		1.56909	0.000873175		1.56588	0.00148397		1.56547	0.00131269		1.56864	0.0010759
1.57889	0.00119658		1.57513	0.00112586		1.5749	0.000564631		1.57459	0.00137197		1.57065	0.000965223		1.57407	0.000915036		1.5706	0.00117314		1.57218	0.00139456		1.57133	0.000598861		1.57242	0.000789802		1.57576	0.00111451		1.57258	0.00140032		1.57721	0.000646898		1.57369	0.00149192		1.57297	0.00120855		1.57332	0.000965614
1.58295	0.00113764		1.58045	0.00189606		1.5824	0.000926734		1.57991	0.000835069		1.5744	0.00107336		1.58126	0.000947147		1.57653	0.00170542		1.58031	0.00152514		1.57883	0.000547175		1.58023	0.000996775		1.58295	0.000964855		1.57915	0.000998789		1.58346	0.000850124		1.58025	0.000695302		1.57891	0.00120385		1.58082	0.00107868
1.58858	0.000801495		1.58482	0.00144222		1.58896	0.000421243		1.58428	0.000247282		1.5794	0.00123398		1.58844	0.000842507		1.5806	0.00129641		1.58562	0.000935564		1.58601	0.000596335		1.58617	0.000942852		1.59076	0.000868728		1.58321	0.00102074		1.58752	0.000865985		1.58463	0.000465521		1.58328	0.000717391		1.58832	0.00164171
1.5967	0.00086523		1.59138	0.000569254		1.59334	0.000160612		1.59085	0.000994912		1.58659	0.00107861		1.59344	0.00121503		1.58685	0.00139324		1.58968	0.000477489		1.5907	0.000364135		1.59054	0.00111311		1.59576	0.00105194		1.58852	0.00124689		1.59315	0.000493791		1.58962	0.00133873		1.58922	0.000972059		1.5927	0.0012816
1.60358	0.000898826		1.5992	0.000420043		1.59865	0.000532675		1.59866	0.00113047		1.59346	0.00114181		1.59782	0.00132394		1.59497	0.00165834		1.59624	0.000702828		1.59539	0.00040222		1.59617	0.00126524		1.59982	0.00072284		1.59633	0.000742232		1.60096	0.000767861		1.59775	0.00136787		1.59703	0.00160991		1.59676	0.000905016
1.60764	0.0011052		1.60482	0.000792725		1.60615	0.000918226		1.60459	0.00107402		1.59846	0.000999658		1.60469	0.000814214		1.60091	0.0015101		1.60437	0.000997503		1.60258	0.000473726		1.60398	0.00145065		1.60701	0.000671196		1.60352	0.00106807		1.60784	0.00138938		1.60494	0.000612969		1.60359	0.00129366		1.60363	0.00137935
1.61295	0.00115799		1.60889	0.00108747		1.61365	0.000573139		1.60866	0.000865141		1.60315	0.000604288		1.61282	0.000233755		1.60435	0.00139344		1.6103	0.00127022		1.61039	0.000651907		1.61086	0.00138663		1.61483	0.000834235		1.6079	0.00117234		1.6119	0.000841454		1.60931	0.000709429		1.60797	0.00102445		1.61082	0.00132409
1.62139	0.00107467		1.61545	0.00140175		1.61834	0.000222865		1.6146	0.000991442		1.61034	0.000965014		1.61844	0.000405086		1.60997	0.00143185		1.61437	0.00107493		1.6157	0.000905092		1.61523	0.00071385		1.62014	0.00117747		1.61289	0.00121396		1.61752	0.00022966		1.61431	0.000929056		1.61328	0.00127591		1.61614	0.00127998
1.62795	0.000878093		1.62357	0.00181582		1.62302	0.00108755		1.62272	0.000896601		1.61815	0.00134233		1.6225	0.001072		1.61779	0.00134782		1.62062	0.000777017		1.61976	0.000899651		1.62054	0.000949965		1.6242	0.00105853		1.62071	0.00187616		1.62565	0.00055681		1.62212	0.00114758		1.6211	0.00103621		1.62051	0.00102853
1.6317	0.000740639		1.6292	0.00180018		1.63052	0.000953088		1.62928	0.000943327		1.62346	0.00176184		1.62876	0.000724394		1.62435	0.00171801		1.62905	0.00137422		1.62695	0.000411935		1.62835	0.00120122		1.63139	0.000944499		1.62789	0.00151831		1.63221	0.000794083		1.62931	0.000931484		1.62828	0.00116215		1.62707	0.00111699
1.63639	0.000932805		1.63295	0.00155671		1.63802	0.000283457		1.63334	0.000886422		1.62753	0.00125246		1.63719	0.000454262		1.62872	0.0014655		1.63468	0.00131829		1.63508	0.000626258		1.63554	0.000949506		1.6392	0.00120706		1.63196	0.000939338		1.63596	0.000904473		1.63338	0.000463535		1.63266	0.00130306		1.63488	0.0010694
1.64389	0.000172201		1.63857	0.00127967		1.64302	0.000802644		1.63928	0.00129517		1.6344	0.000742237		1.64313	0.000979706		1.63404	0.00164327		1.63812	0.000752981		1.63976	0.000715446		1.64023	0.00121109		1.64451	0.00094318		1.63633	0.000916472		1.64065	0.00122993		1.63775	0.000611645		1.63766	0.000682109		1.64113	0.00113928
1.65077	0.0005813		1.64607	0.00120334		1.6474	0.00151191		1.64741	0.00144691		1.64253	0.000801448		1.64688	0.00127252		1.64154	0.00140976		1.64374	0.000923546		1.64351	0.000334212		1.64492	0.00151031		1.64795	0.000555654		1.64383	0.00138248		1.64815	0.00110305		1.64494	0.000674332		1.64516	0.00120577		1.6452	0.00166608
1.65545	0.000853904		1.65232	0.00167396		1.65458	0.00123654		1.65397	0.00141175		1.64784	0.00102401		1.65313	0.000974093		1.64872	0.00171367		1.65155	0.000985023		1.65008	0.000802108		1.65273	0.00121178		1.6542	0.000906048		1.65071	0.00056685		1.65502	0.000871694		1.65212	0.00108997		1.65266	0.0010206		1.65113	0.00142973
1.66014	0.000811669		1.6567	0.0020317		1.66271	0.000892703		1.65741	0.000880639		1.65221	0.000941287		1.66157	0.000818031		1.65341	0.00168147		1.6578	0.00115189		1.65758	0.000511227		1.66023	0.00171636		1.6617	0.000906991		1.65571	0.000656942		1.65971	0.00146044		1.65713	0.000902568		1.65703	0.00131162		1.65894	0.00133709
1.66733	0.000634093		1.66232	0.00147969		1.6674	0.000790193		1.66241	0.00162919		1.65909	0.000371644		1.66751	0.000524097		1.6581	0.00158711		1.66218	0.00109943		1.6632	0.000241915		1.66461	0.00133844		1.66764	0.000875702		1.66039	0.00072394		1.6644	0.00179668		1.6615	0.00102552		1.66109	0.0012062		1.66551	0.00115321
1.67514	0.000970241		1.66982	0.00111253		1.67115	0.00107967		1.67022	0.000896832		1.66721	0.000888165		1.67094	0.00122267		1.66529	0.00159661		1.66749	0.000395673		1.66758	0.000705537		1.66867	0.000843954		1.67201	0.00151881		1.66727	0.00069307		1.67127	0.000933233		1.66837	0.00177467		1.66797	0.00183421		1.66957	0.000772677
1.68045	0.000894794		1.67701	0.00155096		1.67771	0.0014563		1.67678	0.000932687		1.67284	0.00138117		1.67657	0.000860022		1.6731	0.00151051		1.6753	0.000268327		1.67383	0.00101177		1.67554	0.000983237		1.67795	0.00151448		1.67508	0.000868224		1.6794	0.000459955		1.67619	0.00208392		1.67516	0.00162209		1.6752	0.00127394
1.68483	0.0010071		1.68138	0.00128404		1.68521	0.0008346		1.68116	0.00119015		1.67628	0.00135576		1.68407	0.00100283		1.6781	0.00136929		1.68249	0.00116275		1.68164	0.000664149		1.68304	0.00169548		1.68576	0.000789941		1.68071	0.00138568		1.68471	0.00114111		1.68182	0.00130628		1.68047	0.00152438		1.68363	0.00153746
1.69139	0.000641196		1.68638	0.00168776		1.69084	0.000578534		1.68616	0.00118783		1.68221	0.000952835		1.69032	0.00113307		1.68247	0.00114279		1.68718	0.00101114		1.68789	0.000693684		1.68836	0.00176983		1.69264	0.000938468		1.68477	0.00217959		1.68877	0.000907433		1.68619	0.000983135		1.68484	0.00122395		1.69019	0.00137076
1.69952	0.000411594		1.69388	0.00153004		1.69521	0.000726073		1.69366	0.00106986		1.68971	0.00141141		1.69469	0.00117282		1.68966	0.00145621		1.69187	0.0010948		1.69226	0.000444968		1.69273	0.0012322		1.6967	0.0005811		1.69133	0.00171816		1.69533	0.000540315		1.69244	0.00123013		1.69141	0.00108325		1.69364	0.00112906
1.70514	0.000763484		1.70138	0.000988607		1.70146	0.000925282		1.70116	0.00142332		1.69596	0.0011479		1.7	0.00109827		1.69747	0.00164286		1.69937	0.00102894		1.69789	0.000515308		1.69929	0.00166565		1.70201	0.00113543		1.69914	0.00131091		1.70346	0.000479199		1.70056	0.000625772		1.69953	0.000916892		1.69863	0.00190871
1.7092	0.000896906		1.70607	0.000898943		1.70927	0.00101285		1.70584	0.000397641		1.70034	0.000743287		1.70782	0.000809947		1.70216	0.0011781		1.70687	0.00133355		1.7057	0.000456043		1.70742	0.00134211		1.70982	0.00129169		1.70508	0.00151716		1.7094	0.000945499		1.70651	0.000652039		1.70516	0.000888025		1.70613	0.00176406
1.71577	0.000395852		1.71076	0.00162293		1.71552	0.00160114		1.71053	0.00080546		1.70596	0.0011458		1.715	0.000906952		1.70622	0.000705497		1.71187	0.00125867		1.71258	0.000615183		1.71336	0.00121476		1.71701	0.00112921		1.70915	0.00107036		1.71346	0.00124156		1.71056	0.00106922		1.70922	0.000409479		1.71301	0.00118595
1.7242	0.000481473		1.71826	0.00142612		1.7199	0.000386382		1.71772	0.000501735		1.71378	0.00098643		1.71969	0.00070935		1.71278	0.0010792		1.71624	0.00137214		1.71695	0.000559222		1.71742	0.00149539		1.72139	0.000710024		1.71571	0.000767385		1.71971	0.00105483		1.71681	0.00147581		1.71547	0.000926514		1.71739	0.00107474
1.72983	0.000677863		1.72607	0.00165948		1.72552	0.000257103		1.72553	0.00123549		1.72096	0.000600929		1.72438	0.00103809		1.72029	0.00130198		1.72374	0.00148354		1.72226	0.000517445		1.72367	0.0014752		1.72639	0.000550188		1.72383	0.00121785		1.72784	0.00106054		1.72494	0.000840101		1.72359	0.00144333		1.72238	0.00116621
1.73295	0.000950659		1.73045	0.00138382		1.73333	0.0010419		1.73084	0.00101064		1.72534	0.00104606		1.73188	0.000366463		1.7256	0.000927036		1.73155	0.00125705		1.73039	0.000573406		1.73179	0.00220947		1.7342	0.000858361		1.72977	0.00105847		1.73346	0.00142026		1.73119	0.000861291		1.72985	0.001432		1.72957	0.00105686
1.73889	0.00117585		1.73451	0.00139463		1.74021	0.00118052		1.73491	0.000734213		1.73034	0.000806278		1.73969	0.00021916		1.72997	0.00152847		1.73593	0.00147199		1.73726	0.000553781		1.73804	0.00119709		1.74139	0.00078636		1.73352	0.000637963		1.73721	0.000956707		1.73494	0.00147139		1.73391	0.00125175		1.73738	0.00155162
1.7467	0.000825108		1.74138	0.00155349		1.74458	0.00114337		1.74209	0.00143535		1.73815	0.000937298		1.74469	0.000713167		1.73653	0.0011046		1.73999	0.000831792		1.74101	0.00114468		1.74211	0.00118241		1.74545	0.000822361		1.73915	0.000626301		1.74284	0.000547294		1.74025	0.00173119		1.73953	0.0015263		1.74239	0.00124562
1.75264	0.000447685		1.74888	0.0012153		1.74959	0.00126788		1.75022	0.00177146		1.74534	0.000729009		1.74907	0.000777388		1.74435	0.00137713		1.74655	0.00101368		1.7457	0.000927438		1.74773	0.00102408		1.74982	0.000899263		1.74664	0.00109368		1.75065	0.000535451		1.74775	0.00118245		1.74766	0.0013933		1.74676	0.000765015
1.7567	1.15185e-05		1.75389	0.0012015		1.75771	0.00156628		1.75491	0.000972937		1.75003	0.00013333		1.75626	0.000970949		1.7506	0.00124871		1.75405	0.000777017		1.7532	0.00181349		1.75586	0.00108787		1.75701	0.000787868		1.75321	0.000608694		1.7569	0.0010819		1.75431	0.000474571		1.75422	0.00160884		1.75363	0.000532376
1.76233	8.67727e-05		1.75826	0.00137118		1.7649	0.000678139		1.75866	0.000544299		1.75503	0.00138264		1.76407	0.000891459		1.75466	0.00155882		1.75968	0.000552371		1.76008	0.00102187		1.76242	0.000770986		1.7642	0.000312697		1.75759	0.000915786		1.76127	0.00126038		1.75869	0.00140341		1.75797	0.00141297		1.76176	0.00107334
1.77014	0.00053369		1.76482	0.00125875		1.76865	0.000140484		1.76522	0.000438816		1.76253	0.00145676		1.76876	0.00104752		1.7606	0.00136371		1.76406	0.000327956		1.76476	0.000629173		1.76617	0.000768233		1.7692	1.9414e-05		1.7629	0.00076647		1.76659	0.00101613		1.764	0.00126258		1.76297	0.00127976		1.76707	0.000845347
1.77733	0.000464003		1.77295	0.00115575		1.77334	1.16206e-05		1.77272	0.000785566		1.77003	0.00189244		1.77282	0.000871474		1.76841	0.00111575		1.76999	0.000616159		1.76945	0.000990005		1.77117	0.00143367		1.77357	0.00101725		1.7704	0.000942996		1.7744	0.00119609		1.7715	0.00131048		1.77047	0.00134775		1.77114	0.000844651
1.7817	0.000723169		1.77857	0.00135439		1.78084	0.00064058		1.77835	0.000690031		1.7744	0.00164426		1.77938	0.00155545		1.77528	0.000736467		1.77812	0.000982481		1.77664	0.00055689		1.77867	0.00193091		1.78045	0.000993694		1.77789	0.000820434		1.78158	0.000779492		1.779	0.00105553		1.77735	0.000777476		1.77801	0.00127255
1.7867	0.000729888		1.78295	0.00110839		1.78771	0.000563801		1.78272	0.000466343		1.77846	0.0011733		1.78657	0.000884947		1.77935	0.00108849		1.78437	0.0010465		1.78414	0.000601581		1.78554	0.0013015		1.78826	0.000407316		1.78259	0.00151099		1.78596	0.000689615		1.78369	0.000751367		1.78203	0.00123443		1.78613	0.00130343
1.79452	0.0010716		1.78889	0.000284857		1.7924	0.000562972		1.78866	0.00081587		1.78534	0.00148028		1.79188	0.000961742		1.78466	0.00140088		1.78874	0.00113895		1.78976	0.00139475		1.78992	0.00121155		1.79389	0.000818591		1.78727	0.00175406		1.79096	0.00103686		1.78806	0.00111557		1.78703	0.00175296		1.79144	0.00123819
1.80202	0.000822612		1.79701	0.00128634		1.7974	0.000443654		1.79647	0.000987741		1.79253	0.00130054		1.79626	0.000933		1.79278	0.0013441		1.79437	0.00077355		1.79383	0.000703593		1.79492	0.00171751		1.79826	0.000963913		1.79446	0.00110878		1.79846	0.00104278		1.79525	0.00106856		1.79422	0.00164604		1.7952	0.000877852
1.8067	0.00111019		1.80326	0.0015013		1.80427	0.000862822		1.80303	0.00148277		1.79784	0.000566704		1.8025	0.00139377		1.79997	0.0010375		1.80218	0.000890727		1.80039	0.000985536		1.80242	0.00146625		1.80451	0.00054868		1.80227	0.00144605		1.80596	0.000999002		1.80306	0.000967021		1.80172	0.000935922		1.80113	0.00134568
1.81108	0.00149606		1.80732	0.00127208		1.81177	0.00112242		1.80741	0.0014335		1.80221	0.000739928		1.81063	0.00165672		1.80372	0.00123818		1.80905	0.00067001		1.80851	0.000972712		1.80992	0.00118952		1.81264	0.000672703		1.80727	0.00179453		1.81065	0.00132636		1.80837	0.000926407		1.80672	0.00108688		1.80863	0.00120591
1.81889	0.00065329		1.81295	0.000443724		1.8174	0.000820905		1.81272	0.000979414		1.80878	0.0012871		1.81688	0.000499396		1.80841	0.00108849		1.81343	0.000509383		1.81445	0.000647632		1.81492	0.00184853		1.81857	0.00119349		1.81165	0.0015071		1.81534	0.000755807		1.81244	0.00123322		1.81141	0.00112986		1.81457	0.000293004
1.82639	0.00052889		1.82138	0.000372222		1.82177	0.000580195		1.82053	0.000778627		1.8169	0.00111598		1.82125	0.000577539		1.81591	0.00155738		1.81874	0.00111329		1.81851	0.000478778		1.81961	0.00209749		1.82264	0.000801816		1.81915	0.00136579		1.82284	0.000482371		1.81963	0.000908528		1.81828	0.00152737		1.81895	0.00104966
1.83077	0.00125897		1.82795	0.000331988		1.82833	0.000787081		1.82772	0.000864447		1.82284	0.00120606		1.82688	0.00046504		1.82279	0.00124954		1.82687	0.00122908		1.82508	0.000577681		1.82648	0.00133385		1.82889	0.000737354		1.82696	0.00151236		1.83034	0.000611793		1.82775	0.00102618		1.82609	0.0016176		1.82457	0.00145759
1.83483	0.000699364		1.83139	0.00102585		1.83615	0.00109772		1.83209	0.00078626		1.8269	0.00123818		1.83469	0.000806579		1.82747	0.00126853		1.83374	0.00135065		1.8332	0.000758971		1.83429	0.00135657		1.83701	0.000979746		1.83164	0.00129948		1.83502	0.0013731		1.83244	0.000424465		1.83141	0.00108026		1.83238	0.00145411
1.8417	0.00072816		1.83639	0.00106678		1.84208	0.000888345		1.8371	0.00023456		1.83284	0.000981601		1.84157	0.00104123		1.83247	0.000838875		1.83749	0.00140543		1.83883	0.000900623		1.8396	0.000861393		1.84326	0.00145303		1.8354	0.00151808		1.83877	0.00173726		1.83619	0.000592		1.83547	0.000831574		1.83926	0.00112047
1.84889	0.000558455		1.8442	0.000896414		1.84615	0.00106431		1.84491	0.0016012		1.84096	0.000676727		1.84594	0.000968703		1.83966	0.00126254		1.84218	0.000730562		1.84258	0.000741484		1.84367	0.00117071		1.8467	0.0016385		1.84227	0.00104681		1.84534	0.00081079		1.84275	0.000657557		1.84266	0.000241839		1.84364	0.00130528
1.8542	0.000702436		1.85076	0.0016243		1.85271	0.000561519		1.85241	0.00163984		1.84721	0.000619616		1.85126	0.000860471		1.84716	0.00185242		1.84968	0.00118933		1.8482	0.000631893		1.85086	0.00151994		1.85201	0.000836874		1.84977	0.0012414		1.85284	0.000926043		1.85056	0.000411884		1.85047	0.000962437		1.84895	0.00126651
1.85889	0.00111921		1.85545	0.00139256		1.86084	0.000857219		1.85647	0.00091927		1.85159	0.000573213		1.85938	0.000945126		1.85247	0.000692903		1.85655	0.000993112		1.8557	0.000727688		1.85867	0.0011076		1.85951	0.00051136		1.85508	0.00135664		1.85815	0.00121555		1.85587	0.000696405		1.85578	0.00110185		1.85676	0.000859742
1.86545	0.00107314		1.86045	0.00139647		1.86646	0.000927149		1.86085	0.00143535		1.85721	0.00108617		1.86626	0.00111915		1.85685	0.000696826		1.86124	0.000938106		1.86226	0.000857486		1.86398	0.00153715		1.86607	0.000945818		1.85946	0.0010994		1.86252	0.00117727		1.86025	0.000374139		1.85953	0.00124276		1.86395	0.000581597
1.87327	0.00125033		1.86764	0.00184617		1.87021	0.00109233		1.86803	0.000714088		1.86534	0.00105299		1.87001	0.00101788		1.86341	0.000964613		1.86593	0.000934177		1.86664	0.000591477		1.86742	0.0012953		1.87045	0.000519088		1.86571	0.000533923		1.86909	0.00023241		1.8665	0.000171508		1.86578	0.00117092		1.86832	0.00136426
1.8792	0.000702628		1.87514	0.000585347		1.87583	0.000525827		1.87522	0.000920427		1.8719	0.00109414		1.87469	0.000384652		1.87153	0.00162964		1.87312	0.001074		1.87195	0.000614017		1.87367	0.00148117		1.87576	0.000323252		1.87383	0.00101091		1.8769	0.00020957		1.87431	0.000691329		1.87328	0.00118952		1.87332	0.00107056
1.88327	0.00124764		1.88045	0.0010493		1.88333	0.00036314		1.88022	0.000986353		1.87565	0.00121886		1.88219	0.00103225		1.87716	0.00192283		1.88093	0.00145812		1.87945	0.000296904		1.88148	0.0017735		1.88326	0.00102234		1.88008	0.0015135		1.88315	0.000817346		1.88088	0.000729074		1.87891	0.00139501		1.88114	0.00106313
1.8892	0.000953155		1.88482	0.00251589		1.88958	0.000574384		1.8846	0.00180523		1.88065	0.00118863		1.88907	0.00110411		1.88122	0.00169034		1.88624	0.00103818		1.88664	0.000800554		1.8871	0.00163766		1.89076	0.000934698		1.88446	0.00143896		1.88721	0.000720491		1.88494	0.000536817		1.88359	0.000796721		1.88832	0.000895729
1.89733	0.000600113		1.8917	0.00195514		1.89396	0.00102053		1.89147	0.00220657		1.88815	0.000960184		1.89376	0.000498049		1.8881	0.00142441		1.89062	0.000386891		1.89133	0.000880415		1.8918	0.00133638		1.89545	0.00115523		1.88977	0.000715936		1.89315	0.00062131		1.89025	0.000537479		1.88922	0.00121048		1.89269	0.000645445
1.90358	0.000490879		1.89951	0.00153441		1.89959	0.00165301		1.89928	0.00111936		1.89503	0.000914411		1.89844	0.000820052		1.89622	0.00139035		1.89718	0.000245909		1.89601	0.000559999		1.89742	0.00163582		1.90014	0.000908687		1.8979	0.000721653		1.90096	0.000491888		1.89838	0.000823988		1.89703	0.00095816		1.89676	0.000922661
1.90795	0.000315415		1.90482	0.00140566		1.90708	0.00065054		1.90491	0.000399492		1.8994	0.000734468		1.90563	0.00164998		1.90185	0.00171904		1.90499	0.001074		1.90351	0.000276113		1.90523	0.0015679		1.90701	0.000618608		1.90477	0.00126038		1.90784	0.000322709		1.90525	0.00097563		1.90359	0.00111361		1.90395	0.000444382
1.91358	0.000527547		1.9092	0.000868825		1.91427	0.000471045		1.90897	0.000950498		1.9044	0.00105887		1.91313	0.00165964		1.90529	0.00169778		1.91093	0.0011304		1.91101	6.2179e-05		1.91211	0.00169846		1.91482	0.000361515		1.90883	0.00103698		1.9119	0.000293314		1.90963	0.00017504		1.90828	0.00139586		1.91113	0.000784982
1.9217	0.000903241		1.91576	0.000791805		1.91896	0.000788533		1.91553	0.00135138		1.91159	0.00180258		1.91875	0.000304937		1.91122	0.00164141		1.91499	0.00128917		1.91601	0.000978346		1.91648	0.00187308		1.92013	0.000360761		1.91415	0.000760068		1.91752	0.000590223		1.91463	0.000695302		1.9136	0.00196636		1.91613	0.00124399
1.92827	0.000843729		1.92388	0.000668115		1.92365	0.00114524		1.92366	0.00173074		1.9194	0.00124721		1.92282	0.0003485		1.91904	0.00113825		1.92155	0.000657067		1.92039	0.00066376		1.92179	0.00136827		1.92451	0.000812937		1.92227	0.0013898		1.92565	0.000977854		1.92275	0.000489802		1.9211	0.00105545		1.92051	0.00132038
1.93202	0.000699556		1.9292	0.000826521		1.93115	0.00189912		1.92959	0.000944253		1.9244	0.00117771		1.92938	0.000452466		1.92529	0.00135587		1.92968	0.000581723		1.92789	0.000649575		1.92961	0.0018935		1.9317	0.00113355		1.92946	0.00164453		1.93221	0.00146001		1.92994	6.59985e-05		1.92828	0.0010608		1.92739	0.00153189
1.93702	0.000572661		1.93263	0.000272672		1.93896	0.00157229		1.93366	0		1.92878	0.00079179		1.9375	0.00079872		1.92966	0.001526		1.9353	0.000961218		1.9357	0.000736626		1.93679	0.00172462		1.93951	0.000589581		1.93321	0.00104864		1.93596	0.00131219		1.93369	0.000695302		1.93266	0.00118524		1.9352	0.00152121
1.94452	0.000333076		1.93888	0.000571093		1.94365	0.000971349		1.9396	0.000854037		1.93565	0.000439253		1.94344	0.000567659		1.93497	0.000985466		1.93905	0.00114265		1.94007	0.000731768		1.94117	0.00130907		1.94451	0.000834801		1.93759	0.000693299		1.94096	0.00120286		1.93838	0.00127759		1.93766	0.00122224		1.94113	0.00125792
1.95139	0.000721825		1.9467	0.00103091		1.94834	0.00131519		1.94803	0.0013722		1.94378	0.000815936		1.94751	0.0010821		1.94279	0.00133522		1.94468	0.000848432		1.94414	0.000808909		1.94617	0.00200571		1.94826	0.00129734		1.94509	0.00126884		1.94815	0.000633364		1.94588	0.000644534		1.94547	0.00167491		1.9452	0.000860439
1.95577	0.0007272		1.95232	0.00101436		1.95583	0.000856804		1.95397	0.00086329		1.94909	0.00132196		1.95375	0.000954557		1.94997	0.00194389		1.95249	0.000760146		1.9507	0.000400471		1.95398	0.00182536		1.95483	0.00140949		1.95196	0.00157158		1.95502	0.00109797		1.95275	0.00103633		1.95297	0.00161867		1.95114	0.000435327
1.96077	0.000646955		1.9567	0.00106034		1.96333	0.00103941		1.95772	0.000629425		1.95346	0.00135807		1.96219	0.000867656		1.95435	0.00165669		1.95843	0.000816769		1.9582	0.000363941		1.96148	0.00116841		1.96233	0.000690421		1.95696	0.00118469		1.95971	0.000992446		1.95744	0.000811627		1.95703	0.00166828		1.95926	0.000706043
1.96795	0		1.96263	0.000857789		1.96771	0.00109399		1.96303	0.000699978		1.96034	0.000601769		1.96782	0.000959272		1.95935	0.00105814		1.96281	0.00123787		1.96351	0.000671727		1.96554	0.00111678		1.96795	0.00074037		1.96165	0.00131137		1.96471	0.000934502		1.96213	0.000569706		1.96141	0.00171874		1.96582	0.0011748
1.97577	0.000325781		1.97045	0.00118403		1.97177	0.000771725		1.97053	0.00108166		1.96846	0.000580562		1.97126	0.0010693		1.96716	0.00113908		1.96843	0.00126167		1.96789	0.000550089		1.96992	0.00135244		1.97232	0.00134974		1.96852	0.00179704		1.9719	0.000777377		1.96932	0.000345885		1.9686	0.00127142		1.96988	0.000333867
1.98077	0.00056479		1.97732	0.000310837		1.97865	0.000175967		1.97678	0.00152695		1.97378	0.000436524		1.97688	0.000725741		1.97435	0.00119586		1.97593	0.0015471		1.97445	0.000871671		1.97711	0.000929313		1.97826	0.000691929		1.97634	0.00170238		1.9794	0.000426331		1.97713	0.000305933		1.97547	0.0011119		1.97582	0.00122774
1.98514	0.000159339		1.9817	0.000948833		1.98615	0.0004781		1.98147	0.00114851		1.97721	0.00134191		1.98469	0.000887192		1.97904	0.00137424		1.98312	0.000738189		1.98226	0.000775293		1.98429	0.000790261		1.98608	0.000661206		1.98165	0.00115428		1.98471	0.000704419		1.98244	0.00062533		1.98047	0.0013206		1.98395	0.00137447
1.99202	0.000485312		1.9867	0.000675472		1.99146	0.000648672		1.98647	0.00101897		1.98346	0.00126779		1.99094	0.00116586		1.98372	0.00154933		1.9878	0.000882638		1.98851	0.000461096		1.98929	0.00149608		1.99264	0.0007415		1.98602	0.00127638		1.98909	0.000492311		1.9865	0.000868134		1.98484	0.00169822		1.9902	0.00124446
2.00014	0.000637932		1.99451	0.000543504		1.99552	0.000632072		1.99428	0.00114735		1.99096	0.00102108		1.99532	0.00111533		1.99122	0.00123219		1.9928	0.000868771		1.99289	0.000857486		1.99367	0.00171154		1.99701	0.000870048		1.99259	0.00134132		1.99565	0.000901935		1.99307	0.000163341		1.99172	0.00162103		1.99394	0.00100462
2.00545	0.000995197		2.0017	0.000791345		2.00209	0.00180304		2.00147	0.00114365		1.9969	0.000744757		2.00063	0.000860471		1.99904	0.00138642		2.0003	0.000631182		1.99851	0.000636363		2.00055	0.00141577		2.00232	0.000827261		2.0004	0.0016898		2.00377	0.00113138		2.00119	0.000316086		1.99985	0.000803136		1.99895	0.000715097
2.00983	0.000757725		2.00607	0.00133117		2.01021	0.000993552		2.00616	0.00109091		2.00128	0.00085982		2.00813	0.000270132		2.00341	0.00205806		2.0078	0.000466626		2.00632	0.000549118		2.00867	0.00060348		2.01013	0.000740747		2.00633	0.00168386		2.00909	0.000964108		2.00713	0.000770571		2.00547	0.00136871		2.00645	0.000786375
2.01639	0.000522939		2.01107	0.000314975		2.01646	0.00104439		2.01084	0.000378441		2.00721	0.000711792		2.01532	0.000887866		2.00716	0.00154086		2.0128	0.000358926		2.0132	0.000819013		2.01461	0.000860934		2.01733	0.000592032		2.01039	0.00189011		2.01315	0.00112419		2.01119	0.00100521		2.00953	0.00143777		2.01301	0.00129902
2.02452	0.000135534		2.01889	0.00117046		2.02052	0.00108901		2.01834	0.000711312		2.01503	0.000471169		2.02	0.000715637		2.01403	0.00133584		2.01718	0.000250994		2.01726	0.000817459		2.01835	0.00116084		2.0217	0.000791449		2.01696	0.0024453		2.02002	0.000988005		2.01744	0.000478324		2.01609	0.000630791		2.01769	0.00151401
2.03014	0.000807638		2.02638	0.00126473		2.02615	0.00104252		2.02616	0.000512608		2.0219	0.00105929		2.025	0.000239369		2.02153	0.0016218		2.02468	0.000627022		2.02289	0.000209077		2.02461	0.000985761		2.0267	0.000266895		2.02509	0.00159445		2.02815	0.00124283		2.02557	0.000882923		2.02391	0.00121689		2.0227	0.00113464
2.03358	0.000984255		2.03045	0.000899173		2.03427	0.000330562		2.03116	0.000838539		2.02628	0.000912731		2.0325	0.00120672		2.02685	0.00143185		2.03249	0.00114057		2.03101	0.000449437		2.03273	0.00140774		2.03482	0.000207522		2.03071	0.00134315		2.03346	0.00158013		2.0315	0.00108754		2.02984	0.00174911		2.0302	0.00109377
2.03952	0.000406027		2.03451	0.00108379		2.04115	0.000859709		2.03553	0.00099098		2.03128	0		2.04	0.00132237		2.03122	0.00139014		2.03687	0.00118332		2.03789	0.000763635		2.03898	0.00222324		2.0417	0.000368677		2.03446	0.00147966		2.03721	0.00136126		2.03525	0.000993068		2.03391	0.00176514		2.0377	0.00137354
2.04702	0.000962369		2.0417	0.000609028		2.04521	0.00120604		2.04272	0.000628962		2.03909	0.0005266		2.04469	0.000825216		2.03779	0.00114176		2.04093	0.00111144		2.04164	0.000621984		2.04304	0.00210071		2.04576	0.000745082		2.04009	0.00172639		2.04315	0.00155623		2.04088	0.000713181		2.04016	0.0016578		2.0427	0.00101158
2.05295	0.000682854		2.0492	0.000290145		2.05084	0.00114192		2.05053	0.000521166		2.04628	0.00134359		2.04938	0.000667583		2.0456	0.00148202		2.0478	0.000740269		2.04632	0.000560776		2.04898	0.0014752		2.05014	0.000557162		2.04759	0.00185467		2.05065	0.00105102		2.04838	0.001365		2.04859	0.00184854		2.04708	0.00109401
2.05733	0.000544824		2.0542	0.000405559		2.05896	0.000695984		2.05522	0.000850105		2.05096	0.00121425		2.05688	0.000407107		2.05154	0.00181299		2.05499	0.000518397		2.05382	0.000504232		2.05711	0.0012423		2.05732	0.000863451		2.05383	0.00192669		2.05659	0.00145261		2.05494	0.00103677		2.05453	0.00145574		2.05395	0.00141766
2.06295	0.000957954		2.05857	0.000586267		2.06552	0.000830243		2.05897	0.00114851		2.05565	0.00101415		2.06469	0.000408005		2.05591	0.00212785		2.06031	0.000908985		2.0607	0.000361609		2.06336	0.0013467		2.06451	0.000419379		2.05821	0.00188188		2.06096	0.00123226		2.05931	0.000601491		2.05797	0.00136529		2.06176	0.00158273
2.07077	0.000345171		2.06513	0.000309227		2.06927	0.000494909		2.06553	0.00117789		2.06346	0.000448912		2.06907	0.000701939		2.06185	0.0021679		2.06468	0.000397984		2.06539	0.000440305		2.06679	0.00116979		2.0692	0.000471401		2.06384	0.00122059		2.06658	0.000750943		2.06463	0.000728411		2.06359	0.00172922		2.06707	0.00133965
2.07764	0.000713186		2.07295	0.000977572		2.07396	0.00114669		2.07334	0.00133125		2.07096	0.000599039		2.07282	0.00116653		2.06997	0.00203638		2.07124	0.000535499		2.07008	0.000722247		2.07211	0.000872407		2.07389	0.000530963		2.07165	0.00122631		2.0744	0.000497175		2.07213	0.000594207		2.07109	0.00171618		2.07144	0.000684218
2.08202	0.00091284		2.07888	0.000975273		2.08146	0.00188522		2.07866	0.00116887		2.07503	0.000646072		2.07969	0.000927835		2.07622	0.00132159		2.07937	0.000690348		2.07726	0.000707285		2.07961	0.00115533		2.08076	0.00059976		2.07884	0.00195505		2.08158	0.0012976		2.07932	0.000358246		2.07766	0.00210342		2.07863	0.00100508
2.08702	0.000434823		2.08295	0.000501891		2.08833	0.000746824		2.08303	0.00112468		2.07909	0.000773313		2.08719	0.000613243		2.08028	0.00130549		2.0853	0.000663076		2.08507	0.000423983		2.08617	0.000719816		2.08857	0.0010542		2.08321	0.00166534		2.08596	0.000804446		2.084	0.000352728		2.08203	0.00213207		2.08644	0.000928001
2.09483	0.000392204		2.0892	0.000614316		2.09302	0.000862614		2.08928	0.0014409		2.08628	0.000212698		2.09251	0.000993628		2.08591	0.00108065		2.08937	0.00111537		2.09008	0.000424177		2.09085	0.000906367		2.0942	0.00121592		2.08821	0.00158805		2.09065	0.000724086		2.08869	0.000341912		2.08703	0.00194797		2.09176	0.000368229
2.10202	0.00110923		2.09701	0.000354289		2.09771	0.00108071		2.09709	0.000807773		2.09378	0.000198		2.09688	0.000625368		2.09403	0.00106268		2.0953	0.000927937		2.09445	0.00069621		2.09586	0.00120512		2.09826	0.000997086		2.0957	0.00191252		2.09846	0.00134434		2.09619	0.000248984		2.09484	0.00159622		2.09551	0.00104293
2.1067	0.00153906		2.10326	0.000306009		2.1049	0.000608416		2.10335	0.000826048		2.09878	0.000910002		2.10313	0.000875515		2.1006	0.00169241		2.10343	0.000529028		2.10133	0.000619457		2.10367	0.00127695		2.10482	0.000383756		2.10321	0.00119681		2.10596	0.00106921		2.10369	0.000211239		2.10234	0.00158296		2.10176	0.001182
2.1117	0.000900746		2.10732	0.000350841		2.11271	0.000761765		2.10772	0.000825122		2.10315	0.000887955		2.11094	0.000491088		2.10435	0.00138808		2.10999	0.00134788		2.10914	0.000964939		2.11117	0.00170351		2.11295	0.00040317		2.1079	0.00153157		2.11034	0.00120667		2.10869	0.000896167		2.10703	0.000901924		2.10926	0.0012614
2.1192	0.000832595		2.11326	0.00113575		2.11802	0.00099376		2.11303	0.00107264		2.10971	0.00132469		2.11719	0.000432705		2.10935	0.00131168		2.11405	0.00127947		2.11476	0.000698153		2.11586	0.00119411		2.11889	0.00125437		2.11258	0.0018055		2.11502	0.000752		2.11306	0.0011297		2.11141	0.00176301		2.11489	0.0015493
2.1267	0.00158706		2.1217	0.000778011		2.1224	0.00030732		2.12084	0.00122577		2.11784	0.00115335		2.12157	0.000997895		2.11685	0.00163398		2.11968	0.0010814		2.11882	0.00111942		2.12054	0.000894895		2.12295	0.00123495		2.12008	0.00204994		2.12284	0.00145832		2.12057	0.00153584		2.11859	0.00194775		2.11926	0.00160456
2.13108	0.00104166		2.12763	0.00082974		2.12896	0.0001824		2.12772	0.000958132		2.12378	0.00153361		2.12719	0.00084116		2.12372	0.00146261		2.12781	0		2.12539	0.00045993		2.12742	0.00110462		2.1292	0.00101066		2.12789	0.00134612		2.13034	0.00131706		2.12807	0.000835907		2.12641	0.0019176		2.12489	0.00163753
2.13514	0.00120119		2.13138	0.000648802		2.13708	0.000396134		2.13209	0.000844322		2.12784	0.00138957		2.13501	0.000553737		2.12841	0.0012324		2.13437	0.000363779		2.13351	0.000442053		2.13523	0.000893518		2.13764	0.0012031		2.13259	0.00130497		2.13471	0.00082517		2.13275	0.000795514		2.13141	0.00189152		2.1327	0.00139096
2.14233	0.000676135		2.13639	0.00102401		2.14271	0.00088544		2.13741	0.000608837		2.13409	0.00111388		2.14188	0.000773346		2.1331	0.00135112		2.13812	0.000985254		2.13914	0.000828923		2.14054	0.000896501		2.14326	0.000718317		2.13633	0.00162075		2.13877	0.00103834		2.13681	0.00114316		2.13578	0.00200698		2.13957	0.000794037
2.14952	0.000987902		2.1442	0.0010224		2.14677	0.00138989		2.14553	0.00130488		2.14221	0.0007225		2.14594	0.00059438		2.1406	0.00137713		2.14312	0.000926319		2.14289	0.0003107		2.1446	0.00128268		2.1467	0.00112582		2.14321	0.00124003		2.14565	0.00101127		2.14338	0.00117363		2.14297	0.00148674		2.14395	0.00131295
2.15452	0.00143981		2.15076	0.000356588		2.15365	0.00111515		2.15241	0.00160514		2.14815	0.000976772		2.15157	0.000626042		2.14841	0.00108829		2.15062	0.000798973		2.14883	0.000985342		2.15179	0.0011668		2.15232	0.00113807		2.15039	0.00194887		2.15315	0.00081079		2.15088	0.00118422		2.15078	0.00216201		2.14926	0.00147129
2.15889	0.00114398		2.15545	0.000667195		2.16177	0.00125813		2.15647	0.00120171		2.15221	0.00122915		2.15969	0.000704185		2.15341	0.00126131		2.15718	0.000332809		2.15664	0.000431949		2.15992	0.00141095		2.16014	0.000697395		2.15571	0.00168043		2.15815	0.000771033		2.1565	0.00109107		2.15547	0.00247869		2.15707	0.000748298
2.16577	0.00108331		2.16045	0.00109368		2.1674	0.00110768		2.16084	0.0014527		2.15846	0.000777722		2.16657	0.000670727		2.15747	0.00102346		2.16187	0.000181658		2.16257	0.000552032		2.16492	0.00112367		2.16638	0.000340027		2.16039	0.00162989		2.16252	0.0012183		2.16087	0.000175481		2.15922	0.00176001		2.16426	0.00114857
2.17358	0.000517948		2.16795	0.000532009		2.17084	0.00111287		2.16803	0.00148115		2.16659	0.00128333		2.17032	0.000793555		2.16466	0.00114568		2.16687	0.000653138		2.16695	0.000466342		2.16835	0.00141531		2.17076	0.000911514		2.16696	0.00186724		2.16909	0.00091124		2.16713	0.00112264		2.16578	0.00186329		2.16863	0.00121845
2.17952	0.000825491		2.17545	0.000415445		2.17677	0.000720263		2.17522	0.00100787		2.17284	0.000816986		2.17501	0.000725068		2.17279	0.00152228		2.17406	0.0012723		2.17258	0.000467119		2.17491	0.00147887		2.17607	0.0010378		2.17508	0.00136419		2.17721	0.000671006		2.17494	0.0016323		2.17328	0.00215431		2.17363	0.0011156
2.18358	0.0011148		2.18014	0.000449701		2.18427	0.00076716		2.18022	0.00117395		2.17628	0.00098916		2.18251	0.000820501		2.1781	0.00132593		2.18187	0.000792502		2.18039	0.000498986		2.18273	0.00155482		2.18357	0.000507967		2.18134	0.000886288		2.18315	0.000413642		2.18119	0.00137515		2.17891	0.00231212		2.18144	0.000606904
2.18952	0.00046861		2.18451	0.000879171		2.19021	0.000317073		2.18491	0.00129123		2.18159	0.00132343		2.18938	0.000642434		2.18216	0.00163563		2.18687	0.00080036		2.18726	0.00037968		2.18805	0.00123197		2.19107	0.000578273		2.1854	0.00163447		2.18721	0.000715415		2.18556	0.000919785		2.18328	0.00250926		2.18894	0.000699077
2.19764	0.000125552		2.1917	0.000309227		2.19459	0.000689137		2.19178	0.00128823		2.18909	0.0014786		2.19407	0.000821175		2.18904	0.00133027		2.19124	0.00147777		2.19164	0.000258431		2.19242	0.000930231		2.19576	0.000540198		2.19102	0.00194544		2.19315	0.000938309		2.19119	0.000279887		2.18922	0.00260549		2.1927	0.00102041
2.2042	0.000265117		2.19951	0.000410617		2.20021	0.000741637		2.19928	0.00130141		2.19565	0.000577832		2.19876	0.0012083		2.19716	0.00128154		2.19812	0.000547286		2.19664	0.00040494		2.19835	0.000982089		2.20045	0.000953923		2.19914	0.00130794		2.20127	0.00116501		2.199	0		2.19703	0.0022377		2.19707	0.00179889
2.20827	0.0011816		2.20482	0.000129209		2.20802	0.000987119		2.20491	0.000571594		2.20034	0.000564814		2.20594	0.000700143		2.20279	0.00124768		2.20624	0.000439354		2.20445	0.000460707		2.20648	0.00152155		2.20795	0.00129791		2.20571	0.00123911		2.20752	0.00083955		2.20588	0.000758872		2.20359	0.00244768		2.20426	0.00188735
2.2142	0.00100979		2.20888	0.000200251		2.2149	0.00113736		2.20897	0.000565349		2.20534	0.000523031		2.21376	0.000906503		2.20622	0.0011814		2.21155	0.000871313		2.21195	0.0003995		2.21305	0.0016684		2.21545	0.000603718		2.20977	0.00107562		2.2119	0.00133757		2.20994	0.000631069		2.20797	0.00214362		2.21144	0.00136008
2.22233	0.000485888		2.21607	0.00075364		2.21958	0.00108465		2.21553	0.000800602		2.21284	0.000495105		2.21875	0.00077402		2.21247	0.000771773		2.21593	0.00122816		2.21632	0.000453129		2.21742	0.00141508		2.22045	0.000509852		2.21539	0.0011481		2.21752	0.0011815		2.21556	0.000712077		2.21328	0.00228924		2.21645	0.00101042
2.22858	0.000312343		2.22388	0.00100516		2.22459	0.00137101		2.22366	0.00130951		2.22034	0.000389491		2.22313	0.00111511		2.21997	0.000933643		2.22249	0.00199847		2.22101	0.00054562		2.22273	0.00152247		2.22482	0.000546418		2.22352	0.00241557		2.22565	0.00102797		2.22369	0.000360012		2.22109	0.00300235		2.22082	0.00111676
2.23233	0.000857551		2.22888	0.000589026		2.23209	0.00162791		2.22959	0.00122346		2.22534	0.000650901		2.23001	0.00107244		2.22591	0.0012611		2.23062	0.00132453		2.22851	0.000750033		2.23054	0.00164752		2.23233	0.000753375		2.23008	0.00203005		2.23221	0.000905742		2.23056	8.3657e-05		2.22797	0.00371867		2.22769	0.00125328
2.23733	0.000709923		2.23263	0.000852041		2.23959	0.00110166		2.23334	0.000747861		2.22971	0.00101037		2.23782	0.00126398		2.23028	0.00143639		2.23593	0.000896967		2.23632	0.000432727		2.23773	0.00160668		2.24014	0.000411275		2.23383	0.00118743		2.23565	0.000714358		2.23431	0.000544984		2.23234	0.00260869		2.23582	0.00100648
2.24483	0.000113841		2.23889	0.000398662		2.24427	0.000168705		2.2396	0.000150127		2.2369	0.00137109		2.24344	0.000802313		2.23622	0.000967916		2.23937	0.000832023		2.2407	0.00117751		2.24211	0.00147313		2.24482	0.000867032		2.23883	0.00154506		2.24065	0.000752846		2.239	0.000857097		2.23766	0.00165096		2.24145	0.000875994
			2.2467	0		2.24896	0.00093462		2.24803	0.000404812		2.24471	0.000182462		2.2475	0.000564516		2.24403	0.000820706		2.24562	0.000980863		2.24476	0.00107531		2.2471	0.00184968		2.24857	0.000976165		2.24633	0.00140466		2.24846	0.000804869		2.2465	0.000641885		2.24547	0.00166101		2.24551	0.00115646
