# Supplementary material for: Binding and sequestration of poison frog alkaloids by a plasma globulin
Source: eLife journal article supplement (doi:10.7554/elife.85096), 2023-12-14
Supplement: fig5-data1 [file OsABG+PTX_R2 analysis_DoseResponseRawDataGrouped.xlsx]

## Sheet: RawData
NanoTemper Technologies	NanoTemper Technologies
MO.Affinity Analysis v3.0.5	MO.Affinity Analysis v3.0.5
Origin of exported data	Origin of exported data
Project Title:	20230407_BSA+PTX
Comment:
Project File Path:	C:\Users\nanotemper\Desktop\Aurora_MST\20230407_BSA\BSA+PTX analysis.nta3
Analysis-Set Name:	OsABG+PTX
Exported from:	Dose-Response (Grouped)
Exported on:	2023-04-11 08:20:44
Analysis Settings	Analysis Settings
Type of Analysis:	MST
Evaluation strategy:	On Time
Cold Region Start:	-1
Cold Region End:	0
Hot Region Start:	4
Hot Region End:	5
Sample Information	Sample Information
Merge-Set Name:	OsABG+PTX_R2 (#21)
Date of Measurement:	2023-04-11 07:54:00.614 → 2023-04-11 08:00:40.485
Capillary Type:	Monolith Premium Capillary
Target:	OsABG
TargetConcentration:	5e-09
Ligand:	PTX
Measurement Settings	Measurement Settings
MST-Power:	Medium
Excitation-Power:	15
Excitation type:	Pico - RED
Thermostat Setpoint:	25
Fit Results (Kd)	Fit Results (Kd)
Fit Model:	Kd
Bound	909.818
Unbound	900.086
Kd	4.95688e-05
TargetConc	5e-09
Standard Deviation:	1.31301
Lower Kd Confidence:	1.98842e-05
Upper Kd Confidence:	0.000123569
Dose Response Curve	Dose Response Curve	Dose Response Curve
Ligand Concentration [M]	Fnorm [‰]	Error Value
0.001	908.84	0
0.0005	909.117	0
0.00025	908.372	0
0.000125	907.322	0
6.25e-05	905.575	0
3.125e-05	904.22	0
1.5625e-05	902.838	0
7.8125e-06	900.436	0
3.90625e-06	900.103	0
1.95313e-06	897.034	0
9.76563e-07	901.851	0
4.88281e-07	900.181	0
2.44141e-07	900.774	0
1.2207e-07	902.214	0
6.10352e-08	900.794	0
3.05176e-08	899.224	0

## Sheet: Fit-Values
Dose	FNorm
0.000933033
0.000870551
0.000812252
0.000757858
0.000707107
0.000659754
0.000615572
0.000574349
0.000535887
0.0005
0.000466516
0.000435275
0.000406126
0.000378929
0.000353553
0.000329877
0.000307786
0.000287175
0.000267943
0.00025
0.000233258
0.000217638
0.000203063
0.000189465
0.000176777
0.000164938
0.000153893
0.000143587
0.000133972
0.000125
0.000116629
0.000108819
0.000101532
9.47323e-05
8.83883e-05
8.24692e-05
7.69465e-05
7.17936e-05
6.69858e-05
6.25e-05
5.83146e-05
5.44094e-05
5.07658e-05
4.73661e-05
4.41942e-05
4.12346e-05
3.84733e-05
3.58968e-05
3.34929e-05
3.125e-05
2.91573e-05
2.72047e-05
2.53829e-05
2.36831e-05
2.20971e-05
2.06173e-05
1.92366e-05
1.79484e-05
1.67465e-05
1.5625e-05
1.45786e-05
1.36024e-05
1.26914e-05
1.18415e-05
1.10485e-05
1.03087e-05
9.61832e-06
8.97421e-06
8.37323e-06
7.8125e-06
7.28932e-06
6.80118e-06
6.34572e-06
5.92077e-06
5.52427e-06
5.15433e-06
4.80916e-06
4.4871e-06
4.18662e-06
3.90625e-06
3.64466e-06
3.40059e-06
3.17286e-06
2.96038e-06
2.76214e-06
2.57716e-06
2.40458e-06
2.24355e-06
2.09331e-06
1.95312e-06
1.82233e-06
1.70029e-06
1.58643e-06
1.48019e-06
1.38107e-06
1.28858e-06
1.20229e-06
1.12178e-06
1.04665e-06
9.76562e-07
9.11165e-07
8.50147e-07
7.93215e-07
7.40096e-07
6.90534e-07
6.44291e-07
6.01145e-07
5.60888e-07
5.23327e-07
4.88281e-07
4.55583e-07
4.25074e-07
3.96608e-07
3.70048e-07
3.45267e-07
3.22145e-07
3.00572e-07
2.80444e-07
2.61663e-07
2.44141e-07
2.27791e-07
2.12537e-07
1.98304e-07
1.85024e-07
1.72633e-07
1.61073e-07
1.50286e-07
1.40222e-07
1.30832e-07
1.2207e-07
1.13896e-07
1.06268e-07
9.91519e-08
9.2512e-08
8.63167e-08
8.05364e-08
7.51431e-08
7.0111e-08
6.54159e-08
6.10352e-08
5.69478e-08
5.31342e-08
4.9576e-08
4.6256e-08
4.31584e-08
4.02682e-08
3.75715e-08
3.50555e-08
3.27079e-08
3.05176e-08
