# Supplementary material for: Binding and sequestration of poison frog alkaloids by a plasma globulin
Source: eLife journal article supplement (doi:10.7554/elife.85096), 2023-12-14
Supplement: fig5-data1 [file OsABG+PTX_R2 analysis_MSTTraceRawData.xlsx]

## Sheet: RawData
NanoTemper Technologies	NanoTemper Technologies
MO.Affinity Analysis v3.0.5	MO.Affinity Analysis v3.0.5
Origin of exported data	Origin of exported data
Project Title:	20230407_BSA+PTX
Comment:
Project File Path:	C:\Users\nanotemper\Desktop\Aurora_MST\20230407_BSA\BSA+PTX analysis.nta3
Analysis-Set Name:	OsABG+PTX
Exported from:	MST Traces
Exported on:	2023-04-11 08:21:05
Analysis Settings	Analysis Settings
Type of Analysis:	MST
Evaluation strategy:	On Time
Cold Region Start:	-1
Cold Region End:	0
Hot Region Start:	4
Hot Region End:	5
Sample Information	Sample Information		Sample Information	Sample Information		Sample Information	Sample Information		Sample Information	Sample Information		Sample Information	Sample Information		Sample Information	Sample Information		Sample Information	Sample Information		Sample Information	Sample Information		Sample Information	Sample Information		Sample Information	Sample Information		Sample Information	Sample Information		Sample Information	Sample Information		Sample Information	Sample Information		Sample Information	Sample Information		Sample Information	Sample Information		Sample Information	Sample Information
Merge-Set Name:	OsABG+PTX_R2 (#21)		Merge-Set Name:	OsABG+PTX_R2 (#21)		Merge-Set Name:	OsABG+PTX_R2 (#21)		Merge-Set Name:	OsABG+PTX_R2 (#21)		Merge-Set Name:	OsABG+PTX_R2 (#21)		Merge-Set Name:	OsABG+PTX_R2 (#21)		Merge-Set Name:	OsABG+PTX_R2 (#21)		Merge-Set Name:	OsABG+PTX_R2 (#21)		Merge-Set Name:	OsABG+PTX_R2 (#21)		Merge-Set Name:	OsABG+PTX_R2 (#21)		Merge-Set Name:	OsABG+PTX_R2 (#21)		Merge-Set Name:	OsABG+PTX_R2 (#21)		Merge-Set Name:	OsABG+PTX_R2 (#21)		Merge-Set Name:	OsABG+PTX_R2 (#21)		Merge-Set Name:	OsABG+PTX_R2 (#21)		Merge-Set Name:	OsABG+PTX_R2 (#21)
Run Name:	OsABG+PTX_R2 (#21)		Run Name:	OsABG+PTX_R2 (#21)		Run Name:	OsABG+PTX_R2 (#21)		Run Name:	OsABG+PTX_R2 (#21)		Run Name:	OsABG+PTX_R2 (#21)		Run Name:	OsABG+PTX_R2 (#21)		Run Name:	OsABG+PTX_R2 (#21)		Run Name:	OsABG+PTX_R2 (#21)		Run Name:	OsABG+PTX_R2 (#21)		Run Name:	OsABG+PTX_R2 (#21)		Run Name:	OsABG+PTX_R2 (#21)		Run Name:	OsABG+PTX_R2 (#21)		Run Name:	OsABG+PTX_R2 (#21)		Run Name:	OsABG+PTX_R2 (#21)		Run Name:	OsABG+PTX_R2 (#21)		Run Name:	OsABG+PTX_R2 (#21)
Date of Measurement:	2023-04-11 07:54:00		Date of Measurement:	2023-04-11 07:54:26		Date of Measurement:	2023-04-11 07:54:53		Date of Measurement:	2023-04-11 07:55:20		Date of Measurement:	2023-04-11 07:55:47		Date of Measurement:	2023-04-11 07:56:13		Date of Measurement:	2023-04-11 07:56:40		Date of Measurement:	2023-04-11 07:57:07		Date of Measurement:	2023-04-11 07:57:33		Date of Measurement:	2023-04-11 07:58:00		Date of Measurement:	2023-04-11 07:58:27		Date of Measurement:	2023-04-11 07:58:53		Date of Measurement:	2023-04-11 07:59:20		Date of Measurement:	2023-04-11 07:59:47		Date of Measurement:	2023-04-11 08:00:14		Date of Measurement:	2023-04-11 08:00:40
Capillary Type:	Monolith Premium Capillary		Capillary Type:	Monolith Premium Capillary		Capillary Type:	Monolith Premium Capillary		Capillary Type:	Monolith Premium Capillary		Capillary Type:	Monolith Premium Capillary		Capillary Type:	Monolith Premium Capillary		Capillary Type:	Monolith Premium Capillary		Capillary Type:	Monolith Premium Capillary		Capillary Type:	Monolith Premium Capillary		Capillary Type:	Monolith Premium Capillary		Capillary Type:	Monolith Premium Capillary		Capillary Type:	Monolith Premium Capillary		Capillary Type:	Monolith Premium Capillary		Capillary Type:	Monolith Premium Capillary		Capillary Type:	Monolith Premium Capillary		Capillary Type:	Monolith Premium Capillary
Capillary Position:	1		Capillary Position:	9		Capillary Position:	2		Capillary Position:	10		Capillary Position:	3		Capillary Position:	11		Capillary Position:	4		Capillary Position:	12		Capillary Position:	5		Capillary Position:	13		Capillary Position:	6		Capillary Position:	14		Capillary Position:	7		Capillary Position:	15		Capillary Position:	8		Capillary Position:	16
Ligand:	PTX		Ligand:	PTX		Ligand:	PTX		Ligand:	PTX		Ligand:	PTX		Ligand:	PTX		Ligand:	PTX		Ligand:	PTX		Ligand:	PTX		Ligand:	PTX		Ligand:	PTX		Ligand:	PTX		Ligand:	PTX		Ligand:	PTX		Ligand:	PTX		Ligand:	PTX
Ligand Concentration:	0.001		Ligand Concentration:	3.90625e-06		Ligand Concentration:	0.0005		Ligand Concentration:	1.95313e-06		Ligand Concentration:	0.00025		Ligand Concentration:	9.76563e-07		Ligand Concentration:	0.000125		Ligand Concentration:	4.88281e-07		Ligand Concentration:	6.25e-05		Ligand Concentration:	2.44141e-07		Ligand Concentration:	3.125e-05		Ligand Concentration:	1.2207e-07		Ligand Concentration:	1.5625e-05		Ligand Concentration:	6.10352e-08		Ligand Concentration:	7.8125e-06		Ligand Concentration:	3.05176e-08
Target:	OsABG		Target:	OsABG		Target:	OsABG		Target:	OsABG		Target:	OsABG		Target:	OsABG		Target:	OsABG		Target:	OsABG		Target:	OsABG		Target:	OsABG		Target:	OsABG		Target:	OsABG		Target:	OsABG		Target:	OsABG		Target:	OsABG		Target:	OsABG
TargetConcentration:	5e-09		TargetConcentration:	5e-09		TargetConcentration:	5e-09		TargetConcentration:	5e-09		TargetConcentration:	5e-09		TargetConcentration:	5e-09		TargetConcentration:	5e-09		TargetConcentration:	5e-09		TargetConcentration:	5e-09		TargetConcentration:	5e-09		TargetConcentration:	5e-09		TargetConcentration:	5e-09		TargetConcentration:	5e-09		TargetConcentration:	5e-09		TargetConcentration:	5e-09		TargetConcentration:	5e-09
Measurement Settings	Measurement Settings		Measurement Settings	Measurement Settings		Measurement Settings	Measurement Settings		Measurement Settings	Measurement Settings		Measurement Settings	Measurement Settings		Measurement Settings	Measurement Settings		Measurement Settings	Measurement Settings		Measurement Settings	Measurement Settings		Measurement Settings	Measurement Settings		Measurement Settings	Measurement Settings		Measurement Settings	Measurement Settings		Measurement Settings	Measurement Settings		Measurement Settings	Measurement Settings		Measurement Settings	Measurement Settings		Measurement Settings	Measurement Settings		Measurement Settings	Measurement Settings
MST-Power:	Medium		MST-Power:	Medium		MST-Power:	Medium		MST-Power:	Medium		MST-Power:	Medium		MST-Power:	Medium		MST-Power:	Medium		MST-Power:	Medium		MST-Power:	Medium		MST-Power:	Medium		MST-Power:	Medium		MST-Power:	Medium		MST-Power:	Medium		MST-Power:	Medium		MST-Power:	Medium		MST-Power:	Medium
Excitation-Power:	15		Excitation-Power:	15		Excitation-Power:	15		Excitation-Power:	15		Excitation-Power:	15		Excitation-Power:	15		Excitation-Power:	15		Excitation-Power:	15		Excitation-Power:	15		Excitation-Power:	15		Excitation-Power:	15		Excitation-Power:	15		Excitation-Power:	15		Excitation-Power:	15		Excitation-Power:	15		Excitation-Power:	15
Excitation type:	Pico - RED		Excitation type:	Pico - RED		Excitation type:	Pico - RED		Excitation type:	Pico - RED		Excitation type:	Pico - RED		Excitation type:	Pico - RED		Excitation type:	Pico - RED		Excitation type:	Pico - RED		Excitation type:	Pico - RED		Excitation type:	Pico - RED		Excitation type:	Pico - RED		Excitation type:	Pico - RED		Excitation type:	Pico - RED		Excitation type:	Pico - RED		Excitation type:	Pico - RED		Excitation type:	Pico - RED
Thermostat Setpoint:	25		Thermostat Setpoint:	25		Thermostat Setpoint:	25		Thermostat Setpoint:	25		Thermostat Setpoint:	25		Thermostat Setpoint:	25		Thermostat Setpoint:	25		Thermostat Setpoint:	25		Thermostat Setpoint:	25		Thermostat Setpoint:	25		Thermostat Setpoint:	25		Thermostat Setpoint:	25		Thermostat Setpoint:	25		Thermostat Setpoint:	25		Thermostat Setpoint:	25		Thermostat Setpoint:	25
Included	Included		Included	Included		Included	Included		Included	Included		Included	Included		Included	Included		Included	Included		Included	Included		Included	Included		Included	Included		Included	Included		Included	Included		Included	Included		Included	Included		Included	Included		Included	Included
Time [s]	Normalized Fluorescence [-]		Time [s]	Normalized Fluorescence [-]		Time [s]	Normalized Fluorescence [-]		Time [s]	Normalized Fluorescence [-]		Time [s]	Normalized Fluorescence [-]		Time [s]	Normalized Fluorescence [-]		Time [s]	Normalized Fluorescence [-]		Time [s]	Normalized Fluorescence [-]		Time [s]	Normalized Fluorescence [-]		Time [s]	Normalized Fluorescence [-]		Time [s]	Normalized Fluorescence [-]		Time [s]	Normalized Fluorescence [-]		Time [s]	Normalized Fluorescence [-]		Time [s]	Normalized Fluorescence [-]		Time [s]	Normalized Fluorescence [-]		Time [s]	Normalized Fluorescence [-]
-2.9502	1.00057		-2.9501	1.0021		-2.9501	0.998807		-2.9502	0.998224		-2.9502	1.00013		-2.9501	1.00243		-2.9501	0.998277		-2.9502	1.00014		-2.9502	0.999075		-2.9501	0.999714		-2.9501	0.999986		-2.9502	1.00144		-2.9502	1.00019		-2.9502	1.00126		-2.9502	1.00061		-2.9502	1.00016
-2.9002	1.00036		-2.9001	1.00272		-2.9001	1.00091		-2.9002	1.00055		-2.9002	1.00116		-2.9001	1.0033		-2.9001	1.0018		-2.9002	0.999785		-2.9002	1.00065		-2.9001	0.999424		-2.9001	1.00003		-2.9002	1.00281		-2.9002	0.999622		-2.9002	0.999564		-2.9002	1.00125		-2.9002	1.00419
-2.8502	0.998672		-2.8501	1.00323		-2.8501	0.998184		-2.8502	0.998169		-2.8502	1.00024		-2.8501	0.998555		-2.8501	0.999435		-2.8502	1.00136		-2.8502	1.00147		-2.8501	0.999418		-2.8501	0.999888		-2.8502	0.997334		-2.8502	1.00112		-2.8502	0.997499		-2.8502	1.00119		-2.8501	0.998411
-2.8002	1.00165		-2.8001	0.998733		-2.8001	0.998887		-2.8002	1.0016		-2.8002	1.0017		-2.8001	0.997707		-2.8001	1.00125		-2.8002	0.999828		-2.8002	1.00023		-2.8001	0.998977		-2.8001	0.999291		-2.8002	1.0021		-2.8002	1.00014		-2.8002	1.00097		-2.8002	1.0023		-2.8001	1.00191
-2.7502	1.00097		-2.7501	0.997712		-2.7501	1.00007		-2.7502	1.00059		-2.7502	0.999578		-2.7501	0.997992		-2.7501	0.999607		-2.7502	1.00002		-2.7502	0.999669		-2.7501	0.996885		-2.7501	1.00232		-2.7502	0.999828		-2.7502	0.999901		-2.7502	1.00429		-2.7502	0.999493		-2.7501	0.997703
-2.7002	1.00009		-2.7001	1.00273		-2.7001	1.00072		-2.7002	1.00066		-2.7002	1.00131		-2.7001	0.999606		-2.7001	1.00133		-2.7002	0.999745		-2.7002	0.999714		-2.7001	1.00065		-2.7001	0.998564		-2.7002	0.997092		-2.7002	0.997381		-2.7002	1.00094		-2.7002	0.997826		-2.7001	1.00067
-2.6502	0.997497		-2.6501	1.00005		-2.6501	0.999664		-2.6502	0.99872		-2.6502	0.999069		-2.6501	1.00275		-2.6501	1.00006		-2.6502	0.99958		-2.6502	1.00086		-2.6501	1.00138		-2.6501	0.999002		-2.6502	1.00023		-2.6502	1.00205		-2.6502	0.999152		-2.6502	1.00164		-2.6501	0.998199
-2.6002	0.999715		-2.6001	0.99909		-2.6001	1.00046		-2.6002	0.999939		-2.6002	1.00151		-2.6001	1.00167		-2.6001	1.00159		-2.6002	1.00189		-2.6002	1.00056		-2.6001	1.00252		-2.6001	0.999276		-2.6001	1.00009		-2.6002	0.998495		-2.6002	0.998835		-2.6002	0.999603		-2.6001	0.99969
-2.5502	0.998504		-2.5501	0.996134		-2.5501	0.999862		-2.5502	0.998324		-2.5502	0.999124		-2.5501	0.999289		-2.5501	0.999928		-2.5502	0.998703		-2.5502	0.999083		-2.5501	0.998412		-2.5501	1.00076		-2.5501	0.996602		-2.5502	1.00076		-2.5502	0.997868		-2.5502	1.00046		-2.5501	0.997977
-2.5002	1.00163		-2.5001	1.00129		-2.5001	1.00086		-2.5002	1.00064		-2.5002	0.997633		-2.5001	1.00102		-2.5001	1.00043		-2.5002	0.99956		-2.5002	1.0014		-2.5001	0.998356		-2.5001	1.00091		-2.5001	0.998517		-2.5001	0.998931		-2.5002	1.0008		-2.5002	0.998121		-2.5001	0.999881
-2.4502	1.00045		-2.4501	1.00082		-2.4501	0.996531		-2.4502	0.998476		-2.4502	0.998362		-2.4501	0.999357		-2.4501	1.00067		-2.4501	1.00061		-2.4502	1.00389		-2.4501	0.999667		-2.4501	0.999587		-2.4501	0.997295		-2.4501	0.998088		-2.4502	1.00097		-2.4502	0.997366		-2.4501	0.996326
-2.4002	0.99712		-2.4001	1.00087		-2.4001	0.999714		-2.4002	1.00527		-2.4002	0.998959		-2.4001	0.999175		-2.4001	0.999273		-2.4001	1.00356		-2.4002	0.999101		-2.4001	0.998972		-2.4001	0.997748		-2.4001	0.997333		-2.4001	0.999019		-2.4002	0.999727		-2.4002	0.996678		-2.4001	1.00175
-2.3502	1.00129		-2.3501	0.999291		-2.3501	1.00037		-2.3502	0.999325		-2.3502	1.00201		-2.3501	0.99702		-2.3501	0.998644		-2.3501	1.00257		-2.3501	0.998938		-2.3501	1.00051		-2.3501	0.999892		-2.3501	0.999459		-2.3501	0.999453		-2.3502	0.99942		-2.3502	0.999284		-2.3501	1.0002
-2.3002	1.00242		-2.3001	0.997529		-2.3001	1.00091		-2.3001	0.997218		-2.3002	0.996879		-2.3001	0.99941		-2.3001	0.998345		-2.3001	0.99842		-2.3001	0.999163		-2.3001	1.00298		-2.3001	0.999163		-2.3001	0.996709		-2.3001	0.998473		-2.3002	0.999251		-2.3002	0.999254		-2.3001	0.999698
-2.2502	1.00004		-2.2501	0.999783		-2.2501	0.998883		-2.2501	1.00014		-2.2502	0.999729		-2.2501	0.998742		-2.2501	1.00055		-2.2501	0.998551		-2.2501	0.997556		-2.2501	1.00016		-2.2501	1.0008		-2.2501	1.00189		-2.2501	0.998463		-2.2502	0.997772		-2.2502	0.996689		-2.2501	1.00028
-2.2002	1.00027		-2.2001	1.00124		-2.2001	1.00215		-2.2001	0.998645		-2.2001	0.997466		-2.2001	0.99845		-2.2001	0.999456		-2.2001	0.999901		-2.2001	1.00261		-2.2001	0.999815		-2.2001	1.00055		-2.2001	0.998204		-2.2001	0.997731		-2.2002	0.998216		-2.2002	0.999386		-2.2001	0.998142
-2.1502	0.998279		-2.1501	0.999379		-2.1501	1.00289		-2.1501	0.999384		-2.1501	0.999786		-2.1501	0.998625		-2.1501	1.00135		-2.1501	0.998053		-2.1501	0.998364		-2.1501	1.00041		-2.1501	0.999945		-2.1501	1.00024		-2.1501	0.999638		-2.1502	0.999189		-2.1502	1.00029		-2.1501	1.00018
-2.1002	1.00246		-2.1001	0.999908		-2.1001	0.998951		-2.1001	0.999172		-2.1001	1.00077		-2.1001	0.998996		-2.1001	0.999103		-2.1001	0.999479		-2.1001	0.999459		-2.1001	1.00007		-2.1001	1.00055		-2.1001	1.00159		-2.1001	0.999422		-2.1002	1.00083		-2.1002	0.997876		-2.1001	0.998195
-2.0501	0.996483		-2.0501	1.0012		-2.0501	1.00192		-2.0501	1.00102		-2.0501	1.00126		-2.0501	0.9984		-2.0501	1.00021		-2.0501	0.997849		-2.0501	0.998871		-2.0501	1.00267		-2.0501	0.99828		-2.0501	1.00119		-2.0501	1.00026		-2.0502	0.99988		-2.0502	1.0015		-2.0501	1.00048
-2.0001	0.997944		-2.0001	1.00038		-2.0001	1.00254		-2.0001	0.999571		-2.0001	1.0007		-2.0001	1.0016		-2.0001	1.00187		-2.0001	0.99522		-2.0001	1.00126		-2.0001	0.996946		-2.0001	0.997583		-2.0001	0.995011		-2.0001	0.998218		-2.0002	0.997805		-2.0002	0.998959		-2.0001	1.00036
-1.9501	1.00164		-1.9501	0.997351		-1.9501	0.997298		-1.9501	1.00358		-1.9501	1.00108		-1.9501	1.002		-1.9501	0.999731		-1.9501	0.997847		-1.9501	0.998175		-1.9501	1.00105		-1.9501	0.998107		-1.9501	0.997482		-1.9501	0.998946		-1.9502	0.998681		-1.9502	1.00172		-1.9501	0.998654
-1.9001	0.998631		-1.9001	1.00142		-1.9001	0.999735		-1.9001	1.00061		-1.9001	1.00147		-1.9001	1.00174		-1.9001	0.997723		-1.9001	0.999554		-1.9001	0.998866		-1.9001	0.999595		-1.9001	1.00038		-1.9001	1.00245		-1.9001	0.997358		-1.9002	1.00317		-1.9002	0.99921		-1.9001	0.999384
-1.8501	0.998773		-1.8501	0.998355		-1.8501	1.00134		-1.8501	1.00182		-1.8501	0.998513		-1.8501	0.9989		-1.8501	1.00045		-1.8501	1.00009		-1.8501	1.00099		-1.8501	0.999705		-1.8501	1.00005		-1.8501	1.00082		-1.8501	0.996775		-1.8502	1.00011		-1.8502	0.999817		-1.8501	1.00021
-1.8001	1.00195		-1.8001	1.00023		-1.8001	0.999562		-1.8001	0.999775		-1.8001	1.00073		-1.8001	0.996623		-1.8001	0.999837		-1.8001	1.00212		-1.8001	0.999515		-1.8001	1.00102		-1.8001	0.999011		-1.8001	1.0002		-1.8001	1.00223		-1.8001	0.999503		-1.8002	0.999065		-1.8001	1.00047
-1.7501	0.998689		-1.7501	1.00042		-1.7501	1.00103		-1.7501	0.997088		-1.7501	0.998683		-1.7501	0.998028		-1.7501	0.998176		-1.7501	1.00066		-1.7501	0.997031		-1.7501	0.998542		-1.7501	0.999979		-1.7501	1.00029		-1.7501	0.998333		-1.7501	0.999709		-1.7502	0.998775		-1.7501	0.998608
-1.7001	0.998275		-1.7001	0.998265		-1.7001	0.997026		-1.7001	1.00213		-1.7001	1.00075		-1.7001	0.999634		-1.7001	1.00112		-1.7001	0.998483		-1.7001	1.00062		-1.7001	1.00172		-1.7001	1.00107		-1.7001	0.999719		-1.7001	1.00096		-1.7001	1.00009		-1.7001	0.99993		-1.7001	1.00026
-1.6501	0.999247		-1.6501	1.00154		-1.6501	1.00038		-1.6501	0.998413		-1.6501	0.996777		-1.6501	1.0004		-1.6501	1.00036		-1.6501	1.00085		-1.6501	0.998886		-1.6501	1.00036		-1.6501	1.00013		-1.6501	0.996442		-1.6501	1.00034		-1.6501	1.00013		-1.6501	0.997843		-1.6501	1.00159
-1.6001	0.99906		-1.6001	0.998325		-1.6001	1.00089		-1.6001	0.999604		-1.6001	0.999928		-1.6001	0.998351		-1.6001	0.999541		-1.6001	0.997797		-1.6001	1.00112		-1.6	0.999434		-1.6001	1.00133		-1.6001	0.999433		-1.6001	1.00184		-1.6001	0.998303		-1.6001	1.00149		-1.6001	0.998693
-1.5501	0.999312		-1.5501	0.998834		-1.5501	0.997787		-1.5501	1.00096		-1.5501	0.997083		-1.5501	0.998043		-1.5501	0.998533		-1.5501	0.998524		-1.5501	1		-1.55	1.00144		-1.5501	0.999154		-1.5501	1.00025		-1.5501	0.99706		-1.5501	1.00008		-1.5501	0.99914		-1.5501	1.00042
-1.5001	0.999331		-1.5001	1.0004		-1.5001	0.999833		-1.5001	0.999808		-1.5001	1.00034		-1.5	1.00036		-1.5001	0.99921		-1.5001	1.00008		-1.5001	0.999618		-1.5	0.999424		-1.5	0.998866		-1.5001	0.998656		-1.5001	1.00019		-1.5001	1.0011		-1.5001	0.999601		-1.5001	0.9988
-1.4501	0.999247		-1.4501	0.997809		-1.4501	0.999292		-1.4501	0.99995		-1.4501	0.999814		-1.45	0.997949		-1.4501	0.996725		-1.4501	1.00178		-1.4501	0.998844		-1.45	0.999354		-1.45	1.00079		-1.4501	1.00244		-1.4501	0.998919		-1.4501	1.00122		-1.4501	1.00178		-1.4501	0.998029
-1.4001	1.00024		-1.4001	0.996957		-1.4001	1.00095		-1.4001	0.999382		-1.4001	0.999284		-1.4	0.998399		-1.4001	1.00112		-1.4001	1.00155		-1.4001	1.0005		-1.4	0.997302		-1.4	0.997259		-1.4001	0.997926		-1.4001	0.998275		-1.4001	1.00293		-1.4001	0.997826		-1.4001	0.999145
-1.3501	0.997449		-1.3501	0.999509		-1.3501	1.00037		-1.3501	0.998671		-1.3501	0.99912		-1.35	0.99943		-1.35	0.997936		-1.3501	0.994403		-1.3501	1.00044		-1.35	0.999683		-1.35	1.00152		-1.3501	1.00162		-1.3501	0.999207		-1.3501	1.00056		-1.3501	0.998168		-1.3501	1.00243
-1.3001	0.999438		-1.3	1.00275		-1.3001	1.00026		-1.3001	0.999068		-1.3001	0.997985		-1.3	0.998951		-1.3	0.99807		-1.3001	0.999119		-1.3001	1.00119		-1.3	0.998726		-1.3	1.00132		-1.3001	0.999731		-1.3001	1.00087		-1.3001	1.00106		-1.3001	0.998613		-1.3001	1.00058
-1.2501	0.998014		-1.25	0.99806		-1.2501	1.00018		-1.2501	1.00093		-1.2501	0.998355		-1.25	0.998096		-1.25	0.998524		-1.2501	1.00091		-1.2501	1.00192		-1.25	0.996541		-1.25	0.998872		-1.2501	0.999859		-1.2501	0.999705		-1.2501	1.00037		-1.2501	0.999752		-1.2501	0.998561
-1.2001	0.998603		-1.2	0.995973		-1.2	0.996674		-1.2001	0.998457		-1.2001	0.996347		-1.2	0.997328		-1.2	1.0026		-1.2001	1.00052		-1.2001	0.999857		-1.2	1.0002		-1.2	1.0002		-1.2001	0.998379		-1.2001	1.00007		-1.2001	0.999154		-1.2001	0.999052		-1.2001	1.00304
-1.1501	0.995586		-1.15	1.00001		-1.15	0.997401		-1.1501	0.998318		-1.1501	1.00152		-1.15	1.0006		-1.15	0.999086		-1.1501	1.0007		-1.1501	0.997368		-1.15	0.997244		-1.15	0.999688		-1.1501	1.00072		-1.1501	1.00119		-1.1501	1.00042		-1.1501	0.997943		-1.1501	1.00366
-1.1001	1.00033		-1.1	0.999652		-1.1	1.00039		-1.1001	0.996637		-1.1001	0.998191		-1.1	1.00101		-1.1	1.00021		-1.1001	0.997257		-1.1001	0.999171		-1.1	0.997868		-1.1	1.00078		-1.1001	0.99904		-1.1001	0.999151		-1.1001	0.999697		-1.1001	0.997894		-1.1001	1.00056
-1.0501	0.998746		-1.05	1.00044		-1.05	0.997717		-1.0501	0.999264		-1.0501	0.999582		-1.05	0.999552		-1.05	0.99853		-1.0501	0.999808		-1.0501	0.998778		-1.05	0.995998		-1.05	1.00043		-1.0501	0.997293		-1.0501	0.998954		-1.0501	1.00145		-1.0501	0.997935		-1.0501	0.99991
-1.0001	0.998958		-1	0.99757		-1	0.998786		-1.0001	0.999148		-1.0001	0.997796		-1	1.00046		-1	0.998723		-1.0001	1.00485		-1.0001	0.999521		-1	1.00024		-1	1.00106		-1.0001	0.998871		-1.0001	0.999154		-1.0001	1.00296		-1.0001	0.99845		-1	0.996819
-0.9501	1.00108		-0.95	0.998403		-0.95	0.998869		-0.9501	0.999974		-0.9501	0.999709		-0.95	0.994909		-0.95	0.999236		-0.9501	1.00005		-0.9501	0.997306		-0.95	0.999949		-0.95	0.998387		-0.9501	0.999429		-0.9501	0.997729		-0.9501	0.998751		-0.9501	0.996848		-0.95	1.00173
-0.9001	1.00044		-0.9	0.999686		-0.9	0.998907		-0.9001	1.00105		-0.9001	1.00131		-0.9	0.999195		-0.9	0.99997		-0.9001	0.999731		-0.9001	0.999928		-0.9	1.00006		-0.9	0.999032		-0.9001	0.998661		-0.9001	0.998209		-0.9001	0.997512		-0.9001	0.997745		-0.9	1.00156
-0.8501	0.998183		-0.85	0.99893		-0.85	0.996045		-0.8501	1.00014		-0.8501	1.00093		-0.85	0.997753		-0.85	0.999994		-0.8501	0.998586		-0.8501	1.00105		-0.85	1.00132		-0.85	1.00212		-0.8501	0.998429		-0.8501	0.996964		-0.8501	0.999669		-0.8501	0.998394		-0.85	0.997852
-0.8001	1.0008		-0.8	0.997677		-0.8	1.00053		-0.8001	0.998078		-0.8001	0.999514		-0.8	1.00068		-0.8	0.996833		-0.8001	1.0011		-0.8001	0.996604		-0.8	0.998452		-0.8	1.00112		-0.8	0.996327		-0.8001	0.997529		-0.8001	0.998263		-0.8001	0.99954		-0.8	1.00102
-0.7501	0.997899		-0.75	1.00119		-0.75	1.00091		-0.7501	1.00209		-0.7501	1.00032		-0.75	0.996248		-0.75	0.999205		-0.7501	0.999247		-0.7501	0.998239		-0.75	0.998063		-0.75	0.99972		-0.75	1.00049		-0.7501	0.999404		-0.7501	1.00239		-0.7501	0.995825		-0.75	0.998669
-0.7001	0.995992		-0.7	0.998717		-0.7	1.00049		-0.7001	1.00334		-0.7001	0.998898		-0.7	0.999931		-0.7	0.999072		-0.7001	0.998742		-0.7001	0.999578		-0.7	1.00085		-0.7	0.998608		-0.7	0.99898		-0.7001	1.00032		-0.7001	1.00089		-0.7001	0.999245		-0.7	0.998467
-0.6501	0.997217		-0.65	1.00182		-0.65	0.999944		-0.6501	0.995154		-0.6501	1.00028		-0.65	0.996637		-0.65	1.00104		-0.65	1.00042		-0.6501	0.998225		-0.65	1.00101		-0.65	0.999193		-0.65	0.999099		-0.65	0.999697		-0.6501	1.00257		-0.6501	0.999137		-0.65	0.998143
-0.6001	0.998429		-0.6	0.999218		-0.6	0.998749		-0.6001	0.998338		-0.6001	0.998405		-0.6	0.998218		-0.6	0.99953		-0.6	0.999817		-0.6001	0.997522		-0.6	1.00308		-0.6	1.00004		-0.6	0.997196		-0.6	0.995922		-0.6001	1.00189		-0.6001	1.00185		-0.6	0.999642
-0.5501	0.99767		-0.55	1.00172		-0.55	0.998801		-0.5501	1.00107		-0.5501	1.00147		-0.55	0.998954		-0.55	0.998627		-0.55	0.998985		-0.5501	1.00107		-0.55	0.99912		-0.55	0.99988		-0.55	0.998782		-0.55	0.995045		-0.5501	1.00162		-0.5501	1.00335		-0.55	0.998083
-0.5001	1.00002		-0.5	1.00138		-0.5	0.99763		-0.5	1.00046		-0.5001	0.997107		-0.5	0.997967		-0.5	0.999543		-0.5	0.998772		-0.5	0.999245		-0.5	1.00261		-0.5	1.00039		-0.5	0.99883		-0.5	0.999784		-0.5001	1.00105		-0.5001	0.998171		-0.5	1.00172
-0.4501	1.00205		-0.45	1.00282		-0.45	0.999773		-0.45	1.00214		-0.4501	0.997642		-0.45	0.997855		-0.45	0.999756		-0.45	0.997334		-0.45	0.998745		-0.45	0.997722		-0.45	0.997386		-0.45	0.997353		-0.45	0.997574		-0.4501	0.99947		-0.4501	0.99867		-0.45	1.00093
-0.4001	1.00083		-0.4	0.998055		-0.4	0.998863		-0.4	0.99889		-0.4001	0.997011		-0.4	0.999932		-0.4	1.00262		-0.4	1.00145		-0.4	0.998698		-0.4	1.00041		-0.4	0.9978		-0.4	0.997344		-0.4	0.996952		-0.4001	0.997075		-0.4001	0.998412		-0.4	0.99851
-0.3501	0.997476		-0.35	1.00072		-0.35	1.0007		-0.35	0.999218		-0.35	0.998042		-0.35	0.993625		-0.35	0.996975		-0.35	0.996458		-0.35	0.999259		-0.35	0.997315		-0.35	0.997589		-0.35	0.998529		-0.35	0.998724		-0.3501	0.998217		-0.3501	0.99512		-0.35	0.998888
-0.3001	1.00025		-0.3	0.999583		-0.3	0.999534		-0.3	0.996512		-0.3	1.0013		-0.3	0.996571		-0.3	1.0008		-0.3	0.997554		-0.3	0.997884		-0.3	0.996056		-0.3	0.997574		-0.3	0.994939		-0.3	0.99961		-0.3001	1.00008		-0.3001	0.998075		-0.3	0.999467
-0.2501	0.999498		-0.25	0.999791		-0.25	0.999753		-0.25	1.00176		-0.25	1.00199		-0.25	0.997759		-0.25	0.996659		-0.25	1.00193		-0.25	1.00032		-0.25	0.99942		-0.25	0.99885		-0.25	0.997251		-0.25	0.998693		-0.2501	1.00127		-0.2501	1.00081		-0.25	1.00082
-0.2	0.997939		-0.2	1.00193		-0.2	0.999353		-0.2	0.997838		-0.2	1.00166		-0.2	1.00012		-0.2	1.00035		-0.2	0.998574		-0.2	1.00251		-0.2	1.0028		-0.2	0.998076		-0.2	0.997872		-0.2	0.995403		-0.2001	1.00043		-0.2001	0.993324		-0.2	1.00124
-0.15	0.997333		-0.15	0.999333		-0.15	0.999478		-0.15	1.00021		-0.15	0.998769		-0.15	1.00277		-0.15	0.999393		-0.15	0.999772		-0.15	1.00044		-0.15	0.996132		-0.15	0.997711		-0.15	0.99854		-0.15	0.997979		-0.1501	0.9978		-0.1501	0.997637		-0.15	0.998349
-0.0999999	1.00011		-0.0999999	0.999546		-0.0999999	1.00119		-0.0999999	0.996779		-0.0999999	0.997146		-0.0999999	1.00013		-0.0999999	1.00056		-0.0999999	0.999105		-0.0999999	1.00058		-0.0999999	0.999061		-0.0999999	0.997999		-0.0999999	0.996514		-0.0999999	0.994962		-0.1001	1.00086		-0.1001	0.99855		-0.0999999	0.99861
-0.05	0.9991		-0.05	0.997787		-0.05	0.998425		-0.05	0.999386		-0.05	0.998816		-0.05	0.999141		-0.05	1.00049		-0.05	0.99566		-0.05	1.00363		-0.05	0.999202		-0.05	1.00188		-0.05	0.999885		-0.05	0.997037		-0.0501001	0.997787		-0.0501001	0.998349		-0.05	0.998029
0	0.998581		0	1.00158		0	1.00017		0	1.00162		0	0.998491		0	0.998947		0	1.00137		0	1.00369		0	0.998824		0	0.99919		0	1.00119		0	0.995958		0	0.998606		0	0.999599		0	0.999252		0	0.996989
0.05	0.989437		0.05	0.99079		0.05	0.98819		0.05	0.989497		0.05	0.990883		0.05	0.989522		0.05	0.991427		0.05	0.991084		0.05	0.989742		0.0500002	0.989959		0.05	0.9916		0.05	0.99112		0.05	0.98803		0.05	0.992387		0.0499001	0.989862		0.05	0.98949
0.0999999	0.97979		0.0999999	0.975837		0.0999999	0.979932		0.0999999	0.975715		0.0999999	0.97752		0.0999999	0.978194		0.0999999	0.979489		0.0999999	0.977357		0.0999999	0.981165		0.1	0.981472		0.0999999	0.98035		0.0999999	0.972741		0.0999999	0.974722		0.0999999	0.975662		0.0999	0.977106		0.0999999	0.975957
0.15	0.971987		0.15	0.971019		0.15	0.970175		0.15	0.970865		0.15	0.969522		0.15	0.968937		0.15	0.971114		0.15	0.967098		0.15	0.970688		0.15	0.96986		0.15	0.970182		0.15	0.967564		0.15	0.972061		0.15	0.970899		0.15	0.96625		0.15	0.968398
0.2	0.965313		0.2	0.966441		0.2	0.966671		0.2	0.964595		0.2	0.967645		0.2	0.961204		0.2	0.964591		0.2	0.964889		0.2	0.966129		0.2001	0.966394		0.2	0.967175		0.2	0.961844		0.2	0.96273		0.2	0.965836		0.2	0.967166		0.2	0.964736
0.25	0.963635		0.25	0.961755		0.25	0.96179		0.25	0.958916		0.25	0.963137		0.25	0.961583		0.25	0.96215		0.25	0.961161		0.25	0.963357		0.2501	0.960296		0.25	0.962268		0.25	0.958723		0.25	0.964384		0.25	0.962452		0.25	0.961272		0.25	0.962432
0.3	0.960665		0.3	0.958665		0.3	0.960152		0.3	0.958015		0.3	0.959592		0.3	0.956769		0.3	0.959411		0.3	0.95941		0.3	0.960511		0.3001	0.959369		0.3001	0.960156		0.3	0.957586		0.3	0.955505		0.3	0.9613		0.3	0.957603		0.3	0.960419
0.35	0.957319		0.35	0.956773		0.35	0.958287		0.35	0.95325		0.35	0.958953		0.3501	0.957517		0.35	0.958449		0.35	0.957956		0.35	0.959171		0.3501	0.957255		0.3501	0.961065		0.35	0.95617		0.35	0.953773		0.35	0.954519		0.35	0.953594		0.35	0.954562
0.4	0.956491		0.4	0.953471		0.4	0.955016		0.4	0.952872		0.4	0.952984		0.4001	0.955059		0.4	0.956449		0.4	0.952268		0.4	0.953509		0.4001	0.951586		0.4001	0.955948		0.4	0.951827		0.4	0.953558		0.4	0.954097		0.4	0.954018		0.4	0.953435
0.45	0.951832		0.45	0.952569		0.45	0.954478		0.45	0.95318		0.45	0.952871		0.4501	0.953544		0.4501	0.954485		0.45	0.951825		0.45	0.953292		0.4501	0.95243		0.4501	0.955229		0.45	0.951181		0.45	0.951829		0.45	0.954177		0.45	0.950122		0.45	0.952639
0.5	0.954935		0.5001	0.951115		0.5	0.951902		0.5	0.946573		0.5	0.951652		0.5001	0.947949		0.5001	0.950051		0.5	0.947904		0.5	0.952108		0.5001	0.954527		0.5001	0.952702		0.5	0.948327		0.5	0.950344		0.5	0.949805		0.5	0.948624		0.5	0.949195
0.55	0.950088		0.5501	0.949797		0.55	0.951687		0.55	0.949021		0.55	0.947644		0.5501	0.948138		0.5501	0.947922		0.55	0.94899		0.55	0.948569		0.5501	0.948455		0.5501	0.947854		0.55	0.947321		0.55	0.946137		0.55	0.951076		0.55	0.94704		0.55	0.946926
0.6	0.947469		0.6001	0.946884		0.6	0.952094		0.6	0.949254		0.6	0.950482		0.6001	0.952102		0.6001	0.949417		0.6	0.947685		0.6	0.94763		0.6001	0.946955		0.6001	0.948816		0.6	0.947004		0.6	0.945596		0.6	0.944984		0.6	0.943742		0.6	0.946852
0.65	0.949178		0.6501	0.945957		0.6501	0.949296		0.65	0.946737		0.65	0.945911		0.6501	0.944697		0.6501	0.945826		0.65	0.945707		0.65	0.947019		0.6501	0.944624		0.6501	0.947138		0.65	0.948268		0.65	0.94435		0.65	0.94571		0.65	0.944682		0.65	0.944331
0.7	0.944747		0.7001	0.942764		0.7001	0.946314		0.7	0.941914		0.7	0.945545		0.7001	0.946304		0.7001	0.94601		0.7	0.942819		0.7	0.944183		0.7001	0.942795		0.7001	0.942777		0.7	0.945126		0.7	0.941887		0.7	0.944094		0.7	0.944464		0.7	0.943798
0.75	0.943021		0.7501	0.944832		0.7501	0.946386		0.75	0.942962		0.75	0.943358		0.7501	0.945988		0.7501	0.944784		0.75	0.944343		0.75	0.945879		0.7501	0.943641		0.7501	0.942391		0.75	0.945871		0.75	0.942372		0.75	0.943637		0.75	0.944182		0.75	0.942505
0.8	0.945117		0.8001	0.943406		0.8001	0.945451		0.8	0.941452		0.8	0.943975		0.8001	0.943659		0.8001	0.944275		0.8	0.940368		0.8	0.942475		0.8001	0.942549		0.8001	0.944302		0.8	0.942037		0.8	0.942545		0.8	0.942639		0.8	0.943499		0.8001	0.942704
0.85	0.944257		0.8501	0.942452		0.8501	0.943084		0.85	0.940684		0.85	0.939853		0.8501	0.940917		0.8501	0.941615		0.85	0.943247		0.85	0.941653		0.8501	0.94471		0.8501	0.942557		0.85	0.940463		0.85	0.937506		0.85	0.940094		0.85	0.936755		0.8501	0.941294
0.9	0.941214		0.9001	0.940444		0.9001	0.941121		0.9	0.941086		0.9	0.944149		0.9001	0.940752		0.9001	0.941985		0.9	0.941596		0.9	0.940985		0.9001	0.940543		0.9001	0.941917		0.9	0.939007		0.9	0.939428		0.9	0.939786		0.9	0.937869		0.9001	0.939564
0.95	0.94202		0.9501	0.940591		0.9501	0.942045		0.95	0.939043		0.95	0.938741		0.9501	0.93974		0.9501	0.938614		0.95	0.937336		0.95	0.939676		0.9501	0.937862		0.9501	0.942599		0.95	0.938302		0.95	0.93995		0.95	0.939366		0.95	0.936194		0.9501	0.939088
1	0.939462		1.0001	0.937094		1.0001	0.942014		1	0.935216		1	0.940204		1.0001	0.936817		1.0001	0.941757		1	0.935953		1	0.937569		1.0001	0.938183		1.0001	0.938373		1	0.936503		1	0.938048		1	0.937959		1	0.935082		1.0001	0.936449
1.05	0.939042		1.0501	0.936285		1.0501	0.939175		1.05	0.934907		1.05	0.936702		1.0501	0.934877		1.0501	0.938362		1.05	0.938536		1.05	0.93872		1.0501	0.936814		1.0501	0.937666		1.0501	0.938831		1.05	0.935427		1.05	0.93881		1.05	0.93441		1.0501	0.937416
1.1	0.938524		1.1001	0.933992		1.1001	0.935235		1.1	0.932765		1.1	0.934722		1.1001	0.937025		1.1001	0.937191		1.1	0.935608		1.1	0.938526		1.1001	0.935889		1.1001	0.934796		1.1001	0.933998		1.1	0.935335		1.1	0.93951		1.1	0.936211		1.1001	0.93641
1.15	0.939942		1.1501	0.938755		1.1501	0.939581		1.15	0.93453		1.15	0.937059		1.1501	0.933468		1.1501	0.937373		1.15	0.933766		1.15	0.935315		1.1501	0.93293		1.1501	0.938359		1.1501	0.93728		1.1501	0.935079		1.15	0.936529		1.15	0.932587		1.1501	0.936581
1.2	0.935143		1.2001	0.933082		1.2001	0.93865		1.2	0.932251		1.2	0.93674		1.2001	0.932321		1.2001	0.937886		1.2001	0.935286		1.2	0.934623		1.2001	0.936639		1.2001	0.934703		1.2001	0.932996		1.2001	0.935154		1.2	0.932685		1.2	0.935264		1.2001	0.932685
1.25	0.935481		1.2501	0.931706		1.2501	0.937006		1.25	0.935238		1.25	0.938691		1.2501	0.933284		1.2501	0.935886		1.2501	0.93323		1.25	0.934697		1.2501	0.9311		1.2501	0.932487		1.2501	0.932096		1.2501	0.933863		1.25	0.933673		1.25	0.928649		1.2501	0.930846
1.3	0.936709		1.3001	0.934073		1.3001	0.934868		1.3	0.933994		1.3	0.934508		1.3001	0.932608		1.3001	0.934872		1.3001	0.930741		1.3001	0.934472		1.3001	0.932182		1.3001	0.932135		1.3001	0.933416		1.3001	0.931372		1.3	0.932325		1.3	0.930894		1.3001	0.934238
1.35	0.931851		1.3501	0.930296		1.3501	0.933759		1.3501	0.931536		1.35	0.931994		1.3501	0.931357		1.3501	0.935479		1.3501	0.929404		1.3501	0.934001		1.3501	0.93019		1.3501	0.931193		1.3501	0.930021		1.3501	0.929731		1.35	0.933544		1.35	0.931188		1.3501	0.928858
1.4	0.934066		1.4001	0.932118		1.4001	0.935902		1.4001	0.933251		1.4	0.933733		1.4001	0.928343		1.4001	0.933836		1.4001	0.929561		1.4001	0.934483		1.4001	0.932082		1.4001	0.934554		1.4001	0.933594		1.4001	0.93266		1.4	0.931227		1.4	0.930736		1.4001	0.928244
1.45	0.934385		1.4501	0.933124		1.4501	0.934365		1.4501	0.929494		1.4501	0.932683		1.4501	0.929496		1.4501	0.93237		1.4501	0.930694		1.4501	0.933803		1.4501	0.930676		1.4501	0.928347		1.4501	0.929351		1.4501	0.930085		1.45	0.931443		1.45	0.927834		1.4501	0.929318
1.5	0.929794		1.5001	0.928576		1.5001	0.9371		1.5001	0.92741		1.5001	0.930127		1.5001	0.929193		1.5001	0.932588		1.5001	0.931774		1.5001	0.932023		1.5001	0.93014		1.5001	0.929671		1.5001	0.928479		1.5001	0.928914		1.5	0.932784		1.5	0.927607		1.5001	0.928951
1.55	0.927758		1.5501	0.926176		1.5501	0.934403		1.5501	0.927388		1.5501	0.931866		1.5501	0.930138		1.5501	0.931412		1.5501	0.927304		1.5501	0.931759		1.5501	0.929164		1.5501	0.930336		1.5501	0.929544		1.5501	0.929938		1.55	0.927519		1.55	0.927238		1.5501	0.92924
1.6001	0.930579		1.6001	0.929061		1.6001	0.93422		1.6001	0.925618		1.6001	0.931258		1.6001	0.928236		1.6001	0.931114		1.6001	0.930879		1.6001	0.930676		1.6001	0.927864		1.6001	0.929149		1.6001	0.928703		1.6001	0.927232		1.6	0.928304		1.6	0.927527		1.6001	0.928678
1.6501	0.931223		1.6501	0.928088		1.6501	0.93186		1.6501	0.928775		1.6501	0.928347		1.6501	0.927186		1.6501	0.93252		1.6501	0.927324		1.6501	0.929675		1.6501	0.926439		1.6501	0.929508		1.6501	0.92665		1.6501	0.924519		1.65	0.931135		1.65	0.927091		1.6501	0.931023
1.7001	0.930083		1.7001	0.92631		1.7001	0.930923		1.7001	0.926871		1.7001	0.930006		1.7001	0.928054		1.7001	0.932234		1.7001	0.925287		1.7001	0.926467		1.7001	0.925404		1.7001	0.927421		1.7001	0.926787		1.7001	0.92559		1.7	0.925375		1.7	0.925024		1.7001	0.925367
1.7501	0.929399		1.7501	0.926311		1.7501	0.930637		1.7501	0.926282		1.7501	0.93006		1.7501	0.928388		1.7501	0.927613		1.7501	0.92755		1.7501	0.927834		1.7501	0.926793		1.7501	0.928495		1.7501	0.925047		1.7501	0.928319		1.75	0.927313		1.75	0.921207		1.7501	0.925437
1.8001	0.929561		1.8001	0.925178		1.8001	0.932228		1.8001	0.924435		1.8001	0.927663		1.8001	0.923801		1.8001	0.928406		1.8001	0.922141		1.8001	0.928487		1.8001	0.924593		1.8001	0.923409		1.8001	0.92682		1.8001	0.926156		1.8	0.926635		1.8	0.924869		1.8001	0.92034
1.8501	0.927747		1.8501	0.923083		1.8501	0.928706		1.8501	0.923961		1.8501	0.927933		1.8501	0.926071		1.8501	0.926912		1.8501	0.926043		1.8501	0.926266		1.8501	0.924864		1.8501	0.926384		1.8501	0.92655		1.8501	0.925923		1.8501	0.925433		1.85	0.923309		1.8501	0.92281
1.9001	0.923407		1.9001	0.922816		1.9001	0.929281		1.9001	0.923593		1.9001	0.925211		1.9001	0.924981		1.9001	0.927788		1.9001	0.923036		1.9001	0.930178		1.9001	0.923937		1.9001	0.92371		1.9001	0.924966		1.9001	0.923561		1.9001	0.924282		1.9	0.923714		1.9001	0.924614
1.9501	0.927338		1.9501	0.925803		1.9501	0.929559		1.9501	0.920555		1.9501	0.926148		1.9501	0.924269		1.9501	0.923734		1.9501	0.924885		1.9501	0.925265		1.9501	0.921502		1.9501	0.926181		1.9501	0.9216		1.9501	0.925273		1.9501	0.923433		1.9501	0.92406		1.9501	0.926284
2.0001	0.927733		2.0001	0.920986		2.0001	0.926567		2.0001	0.919408		2.0001	0.924659		2.0001	0.924848		2.0001	0.92425		2.0001	0.92349		2.0001	0.927074		2.0001	0.922226		2.0001	0.922417		2.0001	0.920847		2.0001	0.922678		2.0001	0.923638		2.0001	0.920535		2.0001	0.920598
2.0501	0.926671		2.0501	0.922361		2.0501	0.925476		2.0501	0.920197		2.0501	0.924907		2.0501	0.918171		2.0501	0.927148		2.0501	0.922947		2.0501	0.927484		2.0502	0.921849		2.0501	0.922043		2.0501	0.923873		2.0501	0.923029		2.0501	0.921301		2.0501	0.922446		2.0501	0.923875
2.1001	0.926297		2.1001	0.920792		2.1001	0.927927		2.1001	0.920021		2.1001	0.925586		2.1001	0.920178		2.1001	0.924685		2.1001	0.922583		2.1001	0.925602		2.1002	0.922515		2.1001	0.923288		2.1001	0.922334		2.1001	0.924702		2.1001	0.921268		2.1001	0.921796		2.1001	0.919447
2.1501	0.926634		2.1501	0.922963		2.1501	0.929925		2.1501	0.920495		2.1501	0.925817		2.1502	0.921374		2.1501	0.9197		2.1501	0.917204		2.1501	0.922094		2.1502	0.923323		2.1502	0.921077		2.1501	0.920889		2.1501	0.922731		2.1501	0.921734		2.1501	0.917428		2.1501	0.921048
2.2001	0.923735		2.2001	0.918934		2.2001	0.926624		2.2001	0.918495		2.2001	0.924439		2.2002	0.919994		2.2001	0.9218		2.2001	0.92067		2.2001	0.925039		2.2002	0.921454		2.2002	0.922172		2.2001	0.918928		2.2001	0.919332		2.2001	0.921494		2.2001	0.921638		2.2001	0.922668
2.2501	0.924578		2.2501	0.92341		2.2501	0.92571		2.2501	0.918931		2.2501	0.927331		2.2502	0.918968		2.2501	0.924061		2.2501	0.919158		2.2501	0.922847		2.2502	0.918967		2.2502	0.921932		2.2501	0.918553		2.2501	0.917695		2.2501	0.921305		2.2501	0.918513		2.2501	0.919912
2.3001	0.922222		2.3001	0.920929		2.3001	0.925535		2.3001	0.918102		2.3001	0.921849		2.3002	0.918599		2.3002	0.924551		2.3001	0.917491		2.3001	0.923937		2.3002	0.921048		2.3002	0.923123		2.3001	0.920087		2.3001	0.918513		2.3001	0.919555		2.3001	0.918853		2.3001	0.918104
2.3501	0.923574		2.3502	0.91871		2.3501	0.923163		2.3501	0.917096		2.3501	0.921953		2.3502	0.919217		2.3502	0.922759		2.3501	0.916568		2.3501	0.920092		2.3502	0.917316		2.3502	0.922477		2.3501	0.920722		2.3501	0.917889		2.3501	0.912221		2.3501	0.917438		2.3501	0.919193
2.4001	0.923182		2.4002	0.92014		2.4001	0.921381		2.4001	0.918464		2.4001	0.925252		2.4002	0.919291		2.4002	0.923699		2.4001	0.919798		2.4001	0.920101		2.4002	0.921598		2.4002	0.919245		2.4001	0.916124		2.4001	0.915811		2.4001	0.917149		2.4001	0.918672		2.4001	0.917569
2.4501	0.924546		2.4502	0.91908		2.4502	0.92462		2.4501	0.913388		2.4501	0.921236		2.4502	0.917358		2.4502	0.924147		2.4501	0.918536		2.4501	0.917546		2.4502	0.920713		2.4502	0.916231		2.4501	0.919231		2.4501	0.915551		2.4501	0.915907		2.4501	0.9176		2.4501	0.915774
2.5001	0.920032		2.5002	0.913118		2.5002	0.921821		2.5001	0.915111		2.5001	0.91963		2.5002	0.916476		2.5002	0.918792		2.5001	0.916025		2.5001	0.91954		2.5002	0.918113		2.5002	0.915893		2.5001	0.915235		2.5001	0.914005		2.5001	0.919018		2.5001	0.915273		2.5001	0.916144
2.5501	0.921883		2.5502	0.919006		2.5502	0.919859		2.5501	0.914236		2.5501	0.922695		2.5502	0.919032		2.5502	0.922842		2.5501	0.916458		2.5501	0.92034		2.5502	0.915396		2.5502	0.916831		2.5501	0.914193		2.5501	0.916349		2.5501	0.916957		2.5501	0.913563		2.5501	0.914919
2.6001	0.92107		2.6002	0.917188		2.6002	0.925774		2.6001	0.914903		2.6001	0.920349		2.6002	0.916478		2.6002	0.92042		2.6001	0.916129		2.6001	0.917661		2.6002	0.915737		2.6002	0.917157		2.6001	0.915595		2.6001	0.916015		2.6001	0.917679		2.6001	0.916189		2.6001	0.913725
2.6501	0.921987		2.6502	0.915368		2.6502	0.920938		2.6501	0.912879		2.6501	0.919356		2.6502	0.915451		2.6502	0.922561		2.6501	0.916062		2.6501	0.920422		2.6502	0.918108		2.6502	0.917625		2.6501	0.91466		2.6501	0.916235		2.6501	0.91269		2.6501	0.914941		2.6502	0.913127
2.7001	0.920166		2.7002	0.913365		2.7002	0.920945		2.7001	0.91358		2.7001	0.916402		2.7002	0.918994		2.7002	0.916659		2.7001	0.918418		2.7001	0.917163		2.7002	0.916984		2.7002	0.915134		2.7001	0.913995		2.7001	0.915563		2.7001	0.917049		2.7001	0.913802		2.7002	0.913061
2.7501	0.919149		2.7502	0.913313		2.7502	0.922429		2.7501	0.912508		2.7501	0.920286		2.7502	0.915316		2.7502	0.917927		2.7501	0.913848		2.7501	0.91827		2.7502	0.912501		2.7502	0.916557		2.7501	0.911019		2.7501	0.916185		2.7501	0.916651		2.7501	0.91		2.7502	0.915154
2.8001	0.921229		2.8002	0.914573		2.8002	0.923582		2.8001	0.911361		2.8001	0.91987		2.8002	0.913623		2.8002	0.917743		2.8001	0.910118		2.8001	0.915439		2.8002	0.91244		2.8002	0.914604		2.8001	0.914873		2.8001	0.914973		2.8001	0.914286		2.8001	0.911041		2.8002	0.913348
2.8501	0.916777		2.8502	0.913876		2.8502	0.92123		2.8501	0.911836		2.8501	0.91558		2.8502	0.914421		2.8502	0.919108		2.8501	0.914939		2.8501	0.916208		2.8502	0.915173		2.8502	0.914993		2.8502	0.915236		2.8501	0.915833		2.8501	0.914695		2.8501	0.912564		2.8502	0.909582
2.9001	0.918085		2.9002	0.912687		2.9002	0.919297		2.9001	0.909866		2.9001	0.916796		2.9002	0.910643		2.9002	0.916682		2.9001	0.915229		2.9001	0.91555		2.9002	0.915941		2.9002	0.913466		2.9002	0.911909		2.9001	0.910628		2.9001	0.912556		2.9001	0.911942		2.9002	0.90943
2.9501	0.914969		2.9502	0.914719		2.9502	0.919386		2.9501	0.907865		2.9501	0.919633		2.9502	0.912562		2.9502	0.917563		2.9501	0.912325		2.9501	0.91349		2.9502	0.913155		2.9502	0.917121		2.9502	0.910394		2.9501	0.913666		2.9501	0.910535		2.9501	0.912293		2.9502	0.910194
3.0001	0.918793		3.0002	0.91161		3.0002	0.919385		3.0001	0.908626		3.0001	0.918657		3.0002	0.909806		3.0002	0.917374		3.0002	0.912053		3.0001	0.917217		3.0002	0.913547		3.0002	0.914595		3.0002	0.914232		3.0002	0.909183		3.0001	0.912902		3.0001	0.910737		3.0002	0.912099
3.0501	0.91519		3.0502	0.909217		3.0502	0.917638		3.0501	0.90816		3.0501	0.915993		3.0502	0.91271		3.0502	0.914804		3.0502	0.909514		3.0501	0.913507		3.0502	0.910548		3.0502	0.915187		3.0502	0.912854		3.0502	0.911776		3.0501	0.912616		3.0501	0.908672		3.0502	0.911145
3.1001	0.91634		3.1002	0.913614		3.1002	0.91728		3.1001	0.9087		3.1001	0.917707		3.1002	0.912807		3.1002	0.913557		3.1002	0.910734		3.1001	0.91408		3.1002	0.909954		3.1002	0.914794		3.1002	0.913702		3.1002	0.913016		3.1001	0.912508		3.1001	0.911893		3.1002	0.910593
3.1501	0.91601		3.1502	0.910244		3.1502	0.917222		3.1502	0.905673		3.1501	0.915801		3.1502	0.910217		3.1502	0.913442		3.1502	0.910616		3.1502	0.914778		3.1502	0.909948		3.1502	0.913689		3.1502	0.908841		3.1502	0.907719		3.1501	0.910491		3.1501	0.9103		3.1502	0.908759
3.2001	0.918294		3.2002	0.911781		3.2002	0.916865		3.2002	0.90681		3.2001	0.916057		3.2002	0.911755		3.2002	0.914521		3.2002	0.908029		3.2002	0.913862		3.2002	0.910855		3.2002	0.914409		3.2002	0.909411		3.2002	0.912089		3.2001	0.914541		3.2001	0.908889		3.2002	0.910611
3.2501	0.914964		3.2502	0.911111		3.2502	0.915253		3.2502	0.907981		3.2501	0.914112		3.2502	0.909666		3.2502	0.917629		3.2502	0.909044		3.2502	0.913003		3.2502	0.911168		3.2502	0.91279		3.2502	0.912149		3.2502	0.910364		3.2501	0.910098		3.2501	0.906751		3.2502	0.908612
3.3001	0.913441		3.3002	0.909013		3.3002	0.917046		3.3002	0.907751		3.3002	0.91447		3.3002	0.908363		3.3002	0.915532		3.3002	0.908035		3.3002	0.917074		3.3002	0.909747		3.3002	0.910956		3.3002	0.910919		3.3002	0.908762		3.3001	0.909395		3.3001	0.906664		3.3002	0.907601
3.3501	0.914325		3.3502	0.907519		3.3502	0.916144		3.3502	0.907419		3.3502	0.913341		3.3502	0.909543		3.3502	0.913801		3.3502	0.906666		3.3502	0.911625		3.3502	0.907806		3.3502	0.90948		3.3502	0.90803		3.3502	0.908861		3.3501	0.910465		3.3501	0.907183		3.3502	0.905671
3.4001	0.912727		3.4002	0.907657		3.4002	0.916414		3.4002	0.904675		3.4002	0.913707		3.4002	0.909671		3.4002	0.913628		3.4002	0.909716		3.4002	0.914602		3.4002	0.90856		3.4002	0.914332		3.4002	0.911328		3.4002	0.910337		3.4001	0.90877		3.4001	0.905112		3.4002	0.909894
3.4502	0.916481		3.4502	0.90681		3.4502	0.912873		3.4502	0.907782		3.4502	0.913272		3.4502	0.909344		3.4502	0.911372		3.4502	0.905484		3.4502	0.911718		3.4502	0.907367		3.4502	0.908634		3.4502	0.907836		3.4502	0.90787		3.4501	0.908994		3.4501	0.904764		3.4502	0.905128
3.5002	0.914737		3.5002	0.904334		3.5002	0.914838		3.5002	0.905536		3.5002	0.912562		3.5002	0.909566		3.5002	0.910899		3.5002	0.905977		3.5002	0.910772		3.5002	0.909108		3.5002	0.909877		3.5002	0.90821		3.5002	0.906931		3.5001	0.906483		3.5001	0.906207		3.5002	0.906905
3.5502	0.913108		3.5502	0.909978		3.5502	0.914085		3.5502	0.906366		3.5502	0.911168		3.5502	0.907781		3.5502	0.912496		3.5502	0.908201		3.5502	0.911822		3.5502	0.908708		3.5502	0.911325		3.5502	0.908131		3.5502	0.908771		3.5501	0.908819		3.5501	0.903091		3.5502	0.907513
3.6002	0.918298		3.6002	0.908391		3.6002	0.917591		3.6002	0.904294		3.6002	0.911599		3.6002	0.907973		3.6002	0.913377		3.6002	0.904865		3.6002	0.911431		3.6002	0.910879		3.6002	0.909785		3.6002	0.90696		3.6002	0.908691		3.6001	0.907164		3.6001	0.907606		3.6002	0.908318
3.6502	0.912446		3.6502	0.903529		3.6502	0.913781		3.6502	0.90311		3.6502	0.911118		3.6502	0.904256		3.6502	0.910653		3.6502	0.908366		3.6502	0.910807		3.6502	0.908335		3.6502	0.909048		3.6502	0.907244		3.6502	0.908681		3.6501	0.906676		3.6501	0.906226		3.6502	0.904404
3.7002	0.911285		3.7002	0.906584		3.7002	0.917059		3.7002	0.901348		3.7002	0.914016		3.7002	0.906427		3.7002	0.911721		3.7002	0.904334		3.7002	0.908125		3.7002	0.906064		3.7002	0.91045		3.7002	0.906273		3.7002	0.907026		3.7002	0.905205		3.7001	0.903585		3.7002	0.902596
3.7502	0.91215		3.7502	0.904167		3.7502	0.909985		3.7502	0.902962		3.7502	0.910699		3.7502	0.903674		3.7502	0.913033		3.7502	0.904517		3.7502	0.91085		3.7502	0.905436		3.7502	0.908115		3.7502	0.905168		3.7502	0.907073		3.7502	0.90541		3.7501	0.904931		3.7502	0.902351
3.8002	0.908328		3.8002	0.904294		3.8002	0.909406		3.8002	0.905773		3.8002	0.911753		3.8002	0.905406		3.8002	0.911855		3.8002	0.904225		3.8002	0.909342		3.8002	0.907411		3.8002	0.908684		3.8002	0.902768		3.8002	0.90275		3.8002	0.906443		3.8002	0.903056		3.8002	0.904406
3.8502	0.910124		3.8502	0.903869		3.8502	0.912328		3.8502	0.903172		3.8502	0.912126		3.8502	0.905559		3.8502	0.911731		3.8502	0.90393		3.8502	0.909286		3.8503	0.905717		3.8502	0.9071		3.8502	0.904016		3.8502	0.906196		3.8502	0.903868		3.8502	0.905031		3.8502	0.904691
3.9002	0.910506		3.9002	0.905116		3.9002	0.91161		3.9002	0.900444		3.9002	0.910659		3.9002	0.905994		3.9002	0.911698		3.9002	0.903794		3.9002	0.908895		3.9003	0.906217		3.9002	0.908474		3.9002	0.903949		3.9002	0.907639		3.9002	0.905083		3.9002	0.907773		3.9002	0.901788
3.9502	0.909618		3.9502	0.90702		3.9502	0.910605		3.9502	0.903747		3.9502	0.910908		3.9502	0.903887		3.9502	0.910328		3.9502	0.904815		3.9502	0.910637		3.9503	0.904717		3.9503	0.907882		3.9502	0.901867		3.9502	0.904847		3.9502	0.905511		3.9502	0.898688		3.9502	0.902586
4.0002	0.908539		4.0002	0.904111		4.0002	0.911093		4.0002	0.901848		4.0002	0.908558		4.0003	0.905192		4.0002	0.910002		4.0002	0.902306		4.0002	0.907131		4.0003	0.903313		4.0003	0.906804		4.0002	0.906117		4.0002	0.905257		4.0002	0.902199		4.0002	0.900298		4.0002	0.901416
4.0502	0.912336		4.0502	0.902157		4.0502	0.912471		4.0502	0.898948		4.0502	0.91102		4.0503	0.905916		4.0502	0.908893		4.0502	0.903954		4.0502	0.90563		4.0503	0.904942		4.0503	0.902614		4.0502	0.902477		4.0502	0.900148		4.0502	0.905058		4.0502	0.903917		4.0502	0.900924
4.1002	0.911264		4.1002	0.904244		4.1002	0.911866		4.1002	0.900069		4.1002	0.909785		4.1003	0.903949		4.1003	0.908492		4.1002	0.902256		4.1002	0.909539		4.1003	0.905762		4.1003	0.905338		4.1002	0.901773		4.1002	0.902366		4.1002	0.902244		4.1002	0.899306		4.1002	0.904149
4.1502	0.912501		4.1503	0.901802		4.1502	0.90894		4.1502	0.898204		4.1502	0.909623		4.1503	0.901728		4.1503	0.909993		4.1502	0.90334		4.1502	0.906082		4.1503	0.901534		4.1503	0.904662		4.1502	0.901361		4.1502	0.905546		4.1502	0.902239		4.1502	0.903562		4.1502	0.902034
4.2002	0.910321		4.2003	0.900583		4.2002	0.90906		4.2002	0.899141		4.2002	0.908686		4.2003	0.902838		4.2003	0.908613		4.2002	0.901916		4.2002	0.907744		4.2003	0.902593		4.2003	0.905891		4.2002	0.902873		4.2002	0.90447		4.2002	0.902361		4.2002	0.901472		4.2002	0.899258
4.2502	0.908482		4.2503	0.902096		4.2502	0.912654		4.2502	0.899608		4.2502	0.909477		4.2503	0.899902		4.2503	0.909549		4.2502	0.901992		4.2502	0.906119		4.2503	0.89997		4.2503	0.90614		4.2502	0.900319		4.2502	0.90112		4.2502	0.901747		4.2502	0.901781		4.2502	0.900984
4.3002	0.907341		4.3003	0.901926		4.3003	0.910331		4.3002	0.897769		4.3002	0.908477		4.3003	0.900295		4.3003	0.906098		4.3002	0.902425		4.3002	0.905417		4.3003	0.89988		4.3003	0.906093		4.3002	0.902542		4.3002	0.902625		4.3002	0.90407		4.3002	0.901406		4.3002	0.900964
4.3502	0.909709		4.3503	0.901251		4.3503	0.909621		4.3502	0.899134		4.3502	0.907421		4.3503	0.902018		4.3503	0.9063		4.3502	0.900133		4.3502	0.906168		4.3503	0.901002		4.3503	0.906805		4.3502	0.902156		4.3502	0.902038		4.3502	0.900502		4.3502	0.8974		4.3502	0.903162
4.4002	0.905755		4.4003	0.89742		4.4003	0.907431		4.4002	0.897183		4.4002	0.90868		4.4003	0.90142		4.4003	0.908012		4.4002	0.898256		4.4002	0.907126		4.4003	0.900098		4.4003	0.903831		4.4002	0.900479		4.4002	0.901171		4.4002	0.903416		4.4002	0.899218		4.4002	0.899945
4.4502	0.907899		4.4503	0.900394		4.4503	0.909088		4.4502	0.89582		4.4502	0.910989		4.4503	0.902347		4.4503	0.90676		4.4502	0.897596		4.4502	0.905398		4.4503	0.900389		4.4503	0.902806		4.4502	0.900045		4.4502	0.899959		4.4502	0.898473		4.4502	0.899474		4.4503	0.899275
4.5002	0.90954		4.5003	0.89791		4.5003	0.907497		4.5002	0.898353		4.5002	0.908645		4.5003	0.901511		4.5003	0.906077		4.5002	0.897368		4.5002	0.905089		4.5003	0.899247		4.5003	0.904199		4.5002	0.901837		4.5002	0.900954		4.5002	0.901493		4.5002	0.899162		4.5003	0.896384
4.5502	0.908222		4.5503	0.90078		4.5503	0.907301		4.5502	0.893644		4.5502	0.908773		4.5503	0.899716		4.5503	0.907791		4.5502	0.899679		4.5502	0.902801		4.5503	0.899296		4.5503	0.903525		4.5502	0.89952		4.5502	0.90258		4.5502	0.900582		4.5502	0.900919		4.5503	0.896295
4.6002	0.907424		4.6003	0.901404		4.6003	0.906263		4.6002	0.894891		4.6002	0.909523		4.6003	0.899484		4.6003	0.905663		4.6002	0.896406		4.6002	0.906884		4.6003	0.900351		4.6003	0.905464		4.6002	0.899193		4.6002	0.901072		4.6002	0.900056		4.6002	0.897605		4.6003	0.899968
4.6502	0.908193		4.6503	0.898485		4.6503	0.906744		4.6502	0.892192		4.6502	0.904817		4.6503	0.896819		4.6503	0.906216		4.6502	0.897465		4.6502	0.903825		4.6503	0.900128		4.6503	0.902628		4.6502	0.900519		4.6502	0.897755		4.6502	0.897984		4.6502	0.895449		4.6503	0.896043
4.7002	0.906634		4.7003	0.899376		4.7003	0.908827		4.7002	0.894185		4.7002	0.908269		4.7003	0.899269		4.7003	0.903787		4.7002	0.899096		4.7002	0.905032		4.7003	0.899525		4.7003	0.89992		4.7003	0.902367		4.7002	0.900836		4.7002	0.89918		4.7002	0.897322		4.7003	0.893673
4.7502	0.903393		4.7503	0.900809		4.7503	0.907368		4.7502	0.895138		4.7502	0.904289		4.7503	0.896469		4.7503	0.907379		4.7502	0.895509		4.7502	0.903129		4.7503	0.897286		4.7503	0.901834		4.7503	0.899774		4.7502	0.898926		4.7502	0.900608		4.7502	0.896779		4.7503	0.896825
4.8002	0.907064		4.8003	0.898167		4.8003	0.906058		4.8002	0.89436		4.8002	0.906863		4.8003	0.896082		4.8003	0.905074		4.8002	0.89534		4.8002	0.902816		4.8003	0.900938		4.8003	0.901243		4.8003	0.897308		4.8003	0.89756		4.8002	0.899562		4.8002	0.896865		4.8003	0.899034
4.8502	0.908147		4.8503	0.897039		4.8503	0.906911		4.8502	0.894633		4.8502	0.905844		4.8503	0.898943		4.8503	0.904023		4.8503	0.897012		4.8502	0.904368		4.8503	0.89665		4.8503	0.900153		4.8503	0.897076		4.8503	0.89826		4.8502	0.897257		4.8502	0.896969		4.8503	0.896012
4.9002	0.905003		4.9003	0.895941		4.9003	0.905088		4.9002	0.895618		4.9002	0.905689		4.9003	0.897086		4.9003	0.903713		4.9003	0.898561		4.9002	0.902179		4.9003	0.898518		4.9003	0.899551		4.9003	0.896344		4.9003	0.89879		4.9002	0.898879		4.9002	0.893649		4.9003	0.896835
4.9502	0.902123		4.9503	0.894565		4.9503	0.906194		4.9502	0.892784		4.9502	0.902746		4.9503	0.89603		4.9503	0.905073		4.9503	0.89718		4.9503	0.900284		4.9503	0.897076		4.9503	0.899052		4.9503	0.896422		4.9503	0.894972		4.9502	0.895686		4.9502	0.896824		4.9503	0.893483
5.0002	0.904621		5.0003	0.896024		5.0003	0.907798		5.0003	0.894139		5.0002	0.902415		5.0003	0.895899		5.0003	0.904339		5.0003	0.896889		5.0003	0.901075		5.0003	0.89592		5.0003	0.900985		5.0003	0.892139		5.0003	0.897457		5.0002	0.898204		5.0002	0.896261		5.0003	0.892743
5.0502	0.905303		5.0503	0.89875		5.0503	0.904608		5.0503	0.892185		5.0502	0.902727		5.0503	0.896722		5.0503	0.901632		5.0503	0.894859		5.0503	0.901693		5.0503	0.895206		5.0503	0.902659		5.0503	0.898962		5.0503	0.897577		5.0502	0.897121		5.0502	0.894693		5.0503	0.895203
5.1002	0.904124		5.1003	0.897696		5.1003	0.906479		5.1003	0.892743		5.1003	0.903819		5.1003	0.895739		5.1003	0.903067		5.1003	0.895051		5.1003	0.902844		5.1003	0.894494		5.1003	0.900988		5.1003	0.897961		5.1003	0.899177		5.1002	0.893725		5.1002	0.895902		5.1003	0.892372
5.1502	0.902581		5.1503	0.896819		5.1503	0.902451		5.1503	0.891502		5.1503	0.904429		5.1503	0.896129		5.1503	0.903329		5.1503	0.894096		5.1503	0.900207		5.1503	0.894435		5.1503	0.898624		5.1503	0.894969		5.1503	0.896962		5.1502	0.894111		5.1502	0.896114		5.1503	0.893592
5.2002	0.903303		5.2003	0.896828		5.2003	0.901989		5.2003	0.892722		5.2003	0.903968		5.2003	0.895449		5.2003	0.902148		5.2003	0.893654		5.2003	0.898739		5.2003	0.897073		5.2003	0.897144		5.2003	0.895917		5.2003	0.895977		5.2002	0.896218		5.2002	0.894354		5.2003	0.894208
5.2503	0.90556		5.2503	0.896145		5.2503	0.905264		5.2503	0.889971		5.2503	0.905567		5.2503	0.895683		5.2503	0.901904		5.2503	0.894144		5.2503	0.89946		5.2503	0.895854		5.2503	0.898409		5.2503	0.895674		5.2503	0.896395		5.2502	0.894859		5.2502	0.893534		5.2503	0.892555
5.3003	0.903745		5.3003	0.891858		5.3003	0.902652		5.3003	0.892291		5.3003	0.903662		5.3003	0.894245		5.3003	0.901167		5.3003	0.894998		5.3003	0.900597		5.3003	0.894572		5.3003	0.900976		5.3003	0.895475		5.3003	0.893927		5.3002	0.894763		5.3002	0.892474		5.3003	0.894014
5.3503	0.902237		5.3503	0.892072		5.3503	0.90538		5.3503	0.888926		5.3503	0.903444		5.3503	0.897253		5.3503	0.900846		5.3503	0.892006		5.3503	0.89964		5.3503	0.894507		5.3503	0.898864		5.3503	0.894465		5.3503	0.896664		5.3502	0.892033		5.3502	0.894766		5.3503	0.893481
5.4003	0.902175		5.4003	0.894318		5.4003	0.905869		5.4003	0.889853		5.4003	0.903086		5.4003	0.896943		5.4003	0.904658		5.4003	0.8954		5.4003	0.898774		5.4003	0.891234		5.4003	0.900876		5.4003	0.892779		5.4003	0.894579		5.4002	0.893697		5.4002	0.888575		5.4003	0.893912
5.4503	0.901734		5.4503	0.892417		5.4503	0.903749		5.4503	0.8907		5.4503	0.90026		5.4503	0.892608		5.4503	0.901312		5.4503	0.893978		5.4503	0.898415		5.4503	0.891903		5.4503	0.896539		5.4503	0.89255		5.4503	0.894254		5.4502	0.892643		5.4502	0.892211		5.4503	0.887223
5.5003	0.901447		5.5003	0.890449		5.5003	0.904317		5.5003	0.886864		5.5003	0.898739		5.5003	0.893339		5.5003	0.903264		5.5003	0.891978		5.5003	0.89888		5.5003	0.894437		5.5003	0.898149		5.5003	0.894211		5.5003	0.892763		5.5003	0.895149		5.5002	0.892195		5.5003	0.892574
5.5503	0.901227		5.5503	0.894249		5.5503	0.902714		5.5503	0.888849		5.5503	0.902785		5.5503	0.893992		5.5503	0.901101		5.5503	0.894712		5.5503	0.901578		5.5503	0.894088		5.5503	0.896828		5.5503	0.896415		5.5503	0.892221		5.5503	0.892763		5.5502	0.89216		5.5503	0.890312
5.6003	0.899857		5.6003	0.892685		5.6003	0.904202		5.6003	0.89064		5.6003	0.900339		5.6003	0.893415		5.6003	0.900289		5.6003	0.892602		5.6003	0.900655		5.6003	0.895186		5.6003	0.900225		5.6003	0.892342		5.6003	0.897388		5.6003	0.89168		5.6003	0.891876		5.6003	0.891318
5.6503	0.902214		5.6503	0.890947		5.6503	0.90501		5.6503	0.886924		5.6503	0.901121		5.6503	0.892297		5.6503	0.899719		5.6503	0.89037		5.6503	0.900042		5.6503	0.889647		5.6503	0.899877		5.6503	0.890641		5.6503	0.893348		5.6503	0.8927		5.6503	0.891736		5.6503	0.893189
5.7003	0.90241		5.7003	0.890465		5.7003	0.901157		5.7003	0.88769		5.7003	0.899655		5.7003	0.89264		5.7003	0.898911		5.7003	0.890719		5.7003	0.897791		5.7004	0.891147		5.7003	0.895204		5.7003	0.893654		5.7003	0.894695		5.7003	0.891766		5.7003	0.887856		5.7003	0.889233
5.7503	0.903579		5.7503	0.889675		5.7503	0.902243		5.7503	0.887547		5.7503	0.900126		5.7503	0.891083		5.7503	0.900462		5.7503	0.890427		5.7503	0.899125		5.7504	0.890042		5.7503	0.897609		5.7503	0.890866		5.7503	0.89141		5.7503	0.891756		5.7503	0.891893		5.7503	0.890163
5.8003	0.897252		5.8003	0.890971		5.8003	0.904109		5.8003	0.890018		5.8003	0.90121		5.8003	0.895752		5.8003	0.897946		5.8003	0.892612		5.8003	0.896289		5.8004	0.893991		5.8004	0.895739		5.8003	0.891939		5.8003	0.891077		5.8003	0.89337		5.8003	0.891277		5.8003	0.888542
5.8503	0.902141		5.8503	0.892539		5.8503	0.900811		5.8503	0.883815		5.8503	0.898702		5.8504	0.891243		5.8503	0.898483		5.8503	0.889848		5.8503	0.894789		5.8504	0.890339		5.8504	0.895955		5.8503	0.894327		5.8503	0.890935		5.8503	0.894744		5.8503	0.890474		5.8503	0.888099
5.9003	0.899216		5.9003	0.893111		5.9003	0.901892		5.9003	0.888169		5.9003	0.899793		5.9004	0.889784		5.9003	0.898264		5.9003	0.893398		5.9003	0.896979		5.9004	0.8921		5.9004	0.895516		5.9003	0.893207		5.9003	0.895066		5.9003	0.891859		5.9003	0.891859		5.9003	0.889899
5.9503	0.899074		5.9503	0.891247		5.9503	0.901598		5.9503	0.888666		5.9503	0.900106		5.9504	0.891676		5.9504	0.89738		5.9503	0.890983		5.9503	0.897456		5.9504	0.893276		5.9504	0.894405		5.9503	0.891245		5.9503	0.892035		5.9503	0.889327		5.9503	0.888428		5.9503	0.887217
6.0003	0.903404		6.0004	0.891324		6.0003	0.90164		6.0003	0.887557		6.0003	0.900503		6.0004	0.89308		6.0004	0.900509		6.0003	0.892104		6.0003	0.895814		6.0004	0.893781		6.0004	0.896965		6.0003	0.891861		6.0003	0.890738		6.0003	0.891379		6.0003	0.889639		6.0003	0.891656
6.0503	0.902419		6.0504	0.892999		6.0503	0.899979		6.0503	0.884485		6.0503	0.897381		6.0504	0.892109		6.0504	0.897565		6.0503	0.892341		6.0503	0.896343		6.0504	0.888692		6.0504	0.894615		6.0503	0.890962		6.0503	0.892055		6.0503	0.892534		6.0503	0.888073		6.0503	0.887491
6.1003	0.899726		6.1004	0.8887		6.1004	0.899612		6.1003	0.887874		6.1003	0.898516		6.1004	0.894093		6.1004	0.89857		6.1003	0.887804		6.1003	0.895748		6.1004	0.891855		6.1004	0.898619		6.1003	0.888505		6.1003	0.892285		6.1003	0.888935		6.1003	0.887073		6.1003	0.888452
6.1503	0.89651		6.1504	0.889818		6.1504	0.901207		6.1503	0.883339		6.1503	0.900994		6.1504	0.889569		6.1504	0.897927		6.1503	0.890342		6.1503	0.899478		6.1504	0.891018		6.1504	0.89617		6.1503	0.891503		6.1503	0.892187		6.1503	0.892799		6.1503	0.890697		6.1503	0.886863
6.2003	0.89779		6.2004	0.888075		6.2004	0.901996		6.2003	0.886226		6.2003	0.897685		6.2004	0.892131		6.2004	0.898674		6.2003	0.888449		6.2003	0.89874		6.2004	0.888869		6.2004	0.894714		6.2003	0.887267		6.2003	0.890837		6.2003	0.891281		6.2003	0.890551		6.2003	0.889039
6.2503	0.898877		6.2504	0.890969		6.2504	0.896454		6.2503	0.886397		6.2503	0.897193		6.2504	0.892048		6.2504	0.898332		6.2503	0.890203		6.2503	0.894795		6.2504	0.889017		6.2504	0.894624		6.2503	0.888994		6.2503	0.889964		6.2503	0.893005		6.2503	0.89091		6.2503	0.886491
6.3003	0.89946		6.3004	0.88892		6.3004	0.900373		6.3003	0.882605		6.3003	0.898953		6.3004	0.889954		6.3004	0.89398		6.3003	0.889808		6.3003	0.897143		6.3004	0.889658		6.3004	0.896219		6.3003	0.887599		6.3003	0.890776		6.3003	0.890697		6.3003	0.889834		6.3004	0.887909
6.3503	0.899912		6.3504	0.888097		6.3504	0.903866		6.3503	0.884482		6.3503	0.898378		6.3504	0.888929		6.3504	0.896178		6.3503	0.888622		6.3503	0.892572		6.3504	0.887975		6.3504	0.893319		6.3503	0.892331		6.3503	0.889865		6.3503	0.889545		6.3503	0.888226		6.3504	0.889426
6.4003	0.897337		6.4004	0.890899		6.4004	0.899696		6.4003	0.885304		6.4003	0.894849		6.4004	0.892007		6.4004	0.898549		6.4003	0.887451		6.4003	0.897556		6.4004	0.885855		6.4004	0.890684		6.4003	0.888401		6.4003	0.88824		6.4003	0.888915		6.4003	0.889499		6.4004	0.889455
6.4503	0.899296		6.4504	0.88935		6.4504	0.89946		6.4503	0.881961		6.4503	0.899498		6.4504	0.889122		6.4504	0.896441		6.4503	0.887464		6.4503	0.894032		6.4504	0.887825		6.4504	0.89042		6.4503	0.890391		6.4503	0.888103		6.4503	0.888817		6.4503	0.885378		6.4504	0.885226
6.5003	0.896639		6.5004	0.886756		6.5004	0.898445		6.5003	0.885483		6.5003	0.8959		6.5004	0.89025		6.5004	0.89768		6.5003	0.886288		6.5003	0.893987		6.5004	0.890324		6.5004	0.892304		6.5004	0.883909		6.5003	0.887889		6.5003	0.889048		6.5003	0.884523		6.5004	0.886847
6.5503	0.899226		6.5504	0.885814		6.5504	0.896996		6.5503	0.884265		6.5503	0.89907		6.5504	0.890129		6.5504	0.897089		6.5503	0.889325		6.5503	0.892271		6.5504	0.887819		6.5504	0.893693		6.5504	0.890526		6.5503	0.888243		6.5503	0.892026		6.5503	0.884284		6.5504	0.888432
6.6003	0.897959		6.6004	0.88553		6.6004	0.900316		6.6003	0.882834		6.6003	0.894622		6.6004	0.890354		6.6004	0.894701		6.6003	0.884739		6.6003	0.893856		6.6004	0.888556		6.6004	0.892916		6.6004	0.887629		6.6003	0.886993		6.6003	0.886839		6.6003	0.886267		6.6004	0.885804
6.6503	0.896932		6.6504	0.885101		6.6504	0.899846		6.6503	0.88263		6.6503	0.894278		6.6504	0.887488		6.6504	0.895146		6.6504	0.888069		6.6503	0.893584		6.6504	0.889426		6.6504	0.892077		6.6504	0.886309		6.6504	0.886506		6.6503	0.888488		6.6503	0.888552		6.6504	0.886143
6.7003	0.89693		6.7004	0.88625		6.7004	0.899778		6.7003	0.882261		6.7003	0.895001		6.7004	0.888045		6.7004	0.894209		6.7004	0.88548		6.7003	0.895335		6.7004	0.887084		6.7004	0.893054		6.7004	0.888103		6.7004	0.888965		6.7003	0.886575		6.7003	0.883866		6.7004	0.885438
6.7503	0.893346		6.7504	0.883488		6.7504	0.899946		6.7503	0.882865		6.7503	0.896658		6.7504	0.889414		6.7504	0.893923		6.7504	0.888769		6.7503	0.894325		6.7504	0.888873		6.7504	0.892536		6.7504	0.887475		6.7504	0.888167		6.7503	0.886371		6.7503	0.886778		6.7504	0.886299
6.8003	0.898135		6.8004	0.883256		6.8004	0.899495		6.8004	0.88346		6.8003	0.896786		6.8004	0.887391		6.8004	0.894737		6.8004	0.886742		6.8004	0.894072		6.8004	0.884398		6.8004	0.890989		6.8004	0.885324		6.8004	0.886652		6.8003	0.889389		6.8003	0.887862		6.8004	0.884988
6.8503	0.898082		6.8504	0.884205		6.8504	0.897432		6.8504	0.883523		6.8503	0.896428		6.8504	0.889143		6.8504	0.89748		6.8504	0.888384		6.8504	0.893616		6.8504	0.88493		6.8504	0.892884		6.8504	0.885323		6.8504	0.88673		6.8503	0.884541		6.8503	0.886319		6.8504	0.885604
6.9003	0.895553		6.9004	0.886033		6.9004	0.897883		6.9004	0.882283		6.9003	0.895024		6.9004	0.889025		6.9004	0.895212		6.9004	0.887479		6.9004	0.893867		6.9004	0.888296		6.9004	0.891979		6.9004	0.888469		6.9004	0.886294		6.9003	0.884957		6.9003	0.884459		6.9004	0.885505
6.9503	0.895666		6.9504	0.886144		6.9504	0.89525		6.9504	0.877826		6.9504	0.898003		6.9504	0.885029		6.9504	0.894409		6.9504	0.887625		6.9504	0.889937		6.9504	0.885284		6.9504	0.89092		6.9504	0.886675		6.9504	0.884078		6.9503	0.888121		6.9503	0.884489		6.9504	0.883525
7.0003	0.897265		7.0004	0.885406		7.0004	0.898182		7.0004	0.882952		7.0004	0.895446		7.0004	0.886752		7.0004	0.892351		7.0004	0.886287		7.0004	0.895341		7.0004	0.882971		7.0004	0.889031		7.0004	0.88468		7.0004	0.887316		7.0003	0.886443		7.0003	0.883063		7.0004	0.885987
7.0503	0.895582		7.0504	0.886798		7.0504	0.899763		7.0504	0.881274		7.0504	0.897542		7.0504	0.885324		7.0504	0.895861		7.0504	0.887248		7.0504	0.891474		7.0504	0.885563		7.0504	0.890158		7.0504	0.885653		7.0504	0.888073		7.0503	0.88733		7.0503	0.883906		7.0504	0.883613
7.1004	0.897277		7.1004	0.883096		7.1004	0.896395		7.1004	0.881297		7.1004	0.895421		7.1004	0.886438		7.1004	0.893711		7.1004	0.881736		7.1004	0.892278		7.1004	0.883554		7.1004	0.890108		7.1004	0.886712		7.1004	0.886911		7.1003	0.887092		7.1003	0.883731		7.1004	0.887682
7.1504	0.894139		7.1504	0.884964		7.1504	0.897106		7.1504	0.882403		7.1504	0.894655		7.1504	0.885776		7.1504	0.894963		7.1504	0.88379		7.1504	0.89315		7.1504	0.884701		7.1504	0.891531		7.1504	0.885451		7.1504	0.885388		7.1503	0.884848		7.1503	0.883345		7.1504	0.883
7.2004	0.896257		7.2004	0.885057		7.2004	0.898265		7.2004	0.880537		7.2004	0.89464		7.2004	0.888029		7.2004	0.894343		7.2004	0.884989		7.2004	0.891773		7.2004	0.884788		7.2004	0.891355		7.2004	0.886879		7.2004	0.888351		7.2003	0.889965		7.2003	0.884143		7.2004	0.884326
7.2504	0.896774		7.2504	0.884076		7.2504	0.894528		7.2504	0.882271		7.2504	0.892927		7.2504	0.883917		7.2504	0.89425		7.2504	0.884036		7.2504	0.893456		7.2504	0.882542		7.2504	0.890567		7.2504	0.885041		7.2504	0.887017		7.2503	0.883883		7.2503	0.8847		7.2504	0.884336
7.3004	0.896824		7.3004	0.881579		7.3004	0.893781		7.3004	0.881386		7.3004	0.893564		7.3004	0.887981		7.3004	0.89122		7.3004	0.885615		7.3004	0.892331		7.3004	0.88393		7.3004	0.888304		7.3004	0.884185		7.3004	0.885078		7.3003	0.887507		7.3003	0.882844		7.3004	0.88233
7.3504	0.896502		7.3504	0.8829		7.3504	0.896614		7.3504	0.881325		7.3504	0.892092		7.3504	0.88646		7.3504	0.893616		7.3504	0.882355		7.3504	0.89041		7.3504	0.886484		7.3504	0.890055		7.3504	0.884756		7.3504	0.887427		7.3504	0.886401		7.3503	0.882193		7.3504	0.882878
7.4004	0.892466		7.4004	0.882878		7.4004	0.894643		7.4004	0.877934		7.4004	0.893194		7.4004	0.885657		7.4004	0.89169		7.4004	0.882847		7.4004	0.890335		7.4004	0.882958		7.4004	0.889116		7.4004	0.885371		7.4004	0.885918		7.4004	0.885115		7.4003	0.882236		7.4004	0.881341
7.4504	0.893679		7.4504	0.883326		7.4504	0.895748		7.4504	0.876069		7.4504	0.892751		7.4504	0.884465		7.4504	0.892055		7.4504	0.885072		7.4504	0.89419		7.4504	0.887117		7.4504	0.888824		7.4504	0.883968		7.4504	0.886345		7.4504	0.88577		7.4504	0.88276		7.4504	0.882479
7.5004	0.894899		7.5004	0.880778		7.5004	0.894772		7.5004	0.87709		7.5004	0.895324		7.5004	0.884807		7.5004	0.891666		7.5004	0.88553		7.5004	0.890348		7.5005	0.884354		7.5004	0.890119		7.5004	0.883298		7.5004	0.885165		7.5004	0.887028		7.5004	0.884528		7.5004	0.881302
7.5504	0.895348		7.5504	0.882649		7.5504	0.897388		7.5504	0.878313		7.5504	0.893014		7.5504	0.883992		7.5504	0.891884		7.5504	0.883109		7.5504	0.89248		7.5505	0.885707		7.5504	0.88944		7.5504	0.884253		7.5504	0.884708		7.5504	0.884075		7.5504	0.879172		7.5504	0.883688
7.6004	0.892261		7.6004	0.882564		7.6004	0.895582		7.6004	0.878439		7.6004	0.892637		7.6004	0.884484		7.6004	0.893845		7.6004	0.882443		7.6004	0.890233		7.6005	0.884573		7.6004	0.889459		7.6004	0.882312		7.6004	0.882624		7.6004	0.886028		7.6004	0.881204		7.6004	0.881998
7.6504	0.893024		7.6504	0.882192		7.6504	0.895874		7.6504	0.880071		7.6504	0.892527		7.6505	0.883		7.6504	0.894005		7.6504	0.881472		7.6504	0.88869		7.6505	0.882959		7.6505	0.888328		7.6504	0.886118		7.6504	0.883254		7.6504	0.886071		7.6504	0.884022		7.6504	0.880321
7.7004	0.892863		7.7004	0.882061		7.7004	0.894529		7.7004	0.877268		7.7004	0.892188		7.7005	0.882993		7.7004	0.892757		7.7004	0.882556		7.7004	0.89183		7.7005	0.882647		7.7005	0.889687		7.7004	0.885915		7.7004	0.882071		7.7004	0.884918		7.7004	0.881458		7.7004	0.879544
7.7504	0.890539		7.7504	0.883284		7.7504	0.894531		7.7504	0.87831		7.7504	0.892546		7.7505	0.885681		7.7505	0.891979		7.7504	0.882597		7.7504	0.890498		7.7505	0.883865		7.7505	0.890983		7.7504	0.882171		7.7504	0.88349		7.7504	0.881864		7.7504	0.879196		7.7504	0.884037
7.8004	0.890658		7.8005	0.8839		7.8004	0.894783		7.8004	0.878118		7.8004	0.893756		7.8005	0.882336		7.8005	0.890893		7.8004	0.880492		7.8004	0.891362		7.8005	0.884757		7.8005	0.887417		7.8004	0.884982		7.8004	0.886681		7.8004	0.882401		7.8004	0.881376		7.8004	0.88067
7.8504	0.89267		7.8505	0.880243		7.8504	0.893155		7.8504	0.876548		7.8504	0.892336		7.8505	0.885809		7.8505	0.89423		7.8504	0.882665		7.8504	0.890011		7.8505	0.880087		7.8505	0.890846		7.8504	0.884553		7.8504	0.88511		7.8504	0.880784		7.8504	0.883582		7.8504	0.881194
7.9004	0.888879		7.9005	0.883359		7.9004	0.894313		7.9004	0.878249		7.9004	0.89392		7.9005	0.88276		7.9005	0.893668		7.9004	0.880721		7.9004	0.890266		7.9005	0.88105		7.9005	0.887717		7.9004	0.884187		7.9004	0.881152		7.9004	0.884044		7.9004	0.883767		7.9004	0.877782
7.9504	0.892142		7.9505	0.882		7.9505	0.893502		7.9504	0.878138		7.9504	0.892278		7.9505	0.886087		7.9505	0.893309		7.9504	0.881542		7.9504	0.888485		7.9505	0.88026		7.9505	0.888074		7.9504	0.883922		7.9504	0.884295		7.9504	0.882594		7.9504	0.877583		7.9504	0.881799
8.0004	0.89119		8.0005	0.88144		8.0005	0.893636		8.0004	0.874171		8.0004	0.892788		8.0005	0.880682		8.0005	0.892278		8.0004	0.883037		8.0004	0.887421		8.0005	0.884755		8.0005	0.887949		8.0004	0.883326		8.0004	0.880515		8.0004	0.881894		8.0004	0.882452		8.0004	0.878412
8.0504	0.890415		8.0505	0.880078		8.0505	0.896276		8.0504	0.874181		8.0504	0.890411		8.0505	0.883371		8.0505	0.890624		8.0504	0.879314		8.0504	0.891492		8.0505	0.879447		8.0505	0.890083		8.0504	0.883076		8.0504	0.884517		8.0504	0.882967		8.0504	0.882283		8.0504	0.88033
8.1004	0.891643		8.1005	0.88001		8.1005	0.89163		8.1004	0.874898		8.1004	0.891888		8.1005	0.882492		8.1005	0.890763		8.1004	0.88153		8.1004	0.888473		8.1005	0.883854		8.1005	0.88623		8.1004	0.881627		8.1004	0.883337		8.1004	0.882102		8.1004	0.878826		8.1005	0.880924
8.1504	0.892442		8.1505	0.880099		8.1505	0.892076		8.1504	0.87808		8.1504	0.889121		8.1505	0.881485		8.1505	0.890118		8.1504	0.881986		8.1504	0.887141		8.1505	0.87877		8.1505	0.887858		8.1504	0.882514		8.1504	0.882442		8.1504	0.884907		8.1504	0.880609		8.1505	0.879309
8.2004	0.8894		8.2005	0.880256		8.2005	0.89421		8.2004	0.875761		8.2004	0.891706		8.2005	0.882159		8.2005	0.889587		8.2004	0.882031		8.2004	0.886543		8.2005	0.879056		8.2005	0.887864		8.2004	0.881066		8.2004	0.883626		8.2004	0.882776		8.2004	0.88144		8.2005	0.880006
8.2504	0.891545		8.2505	0.880812		8.2505	0.895005		8.2504	0.875459		8.2504	0.885985		8.2505	0.881817		8.2505	0.892691		8.2504	0.882088		8.2504	0.888321		8.2505	0.882873		8.2505	0.886154		8.2504	0.881202		8.2504	0.880979		8.2504	0.881713		8.2504	0.8823		8.2505	0.881234
8.3004	0.891724		8.3005	0.87866		8.3005	0.892772		8.3004	0.87469		8.3004	0.888505		8.3005	0.884322		8.3005	0.891481		8.3004	0.88078		8.3004	0.886526		8.3005	0.880403		8.3005	0.889006		8.3004	0.881384		8.3004	0.879876		8.3004	0.880173		8.3004	0.881379		8.3005	0.879992
8.3504	0.892497		8.3505	0.879262		8.3505	0.89213		8.3504	0.875085		8.3504	0.891625		8.3505	0.882508		8.3505	0.891079		8.3504	0.881904		8.3504	0.889166		8.3505	0.883551		8.3505	0.888872		8.3505	0.881344		8.3504	0.883425		8.3504	0.882812		8.3504	0.880603		8.3505	0.882018
8.4004	0.888294		8.4005	0.878859		8.4005	0.891453		8.4004	0.876106		8.4004	0.892144		8.4005	0.883119		8.4005	0.893084		8.4004	0.881565		8.4004	0.885697		8.4005	0.881288		8.4005	0.886057		8.4005	0.878767		8.4004	0.881301		8.4004	0.88269		8.4004	0.882792		8.4005	0.878558
8.4504	0.889672		8.4505	0.876561		8.4505	0.893294		8.4504	0.875718		8.4504	0.890484		8.4505	0.880202		8.4505	0.891409		8.4504	0.881118		8.4504	0.888217		8.4505	0.88254		8.4505	0.886573		8.4505	0.88034		8.4505	0.880708		8.4504	0.881237		8.4504	0.880516		8.4505	0.876172
8.5004	0.893769		8.5005	0.88075		8.5005	0.892297		8.5004	0.876327		8.5004	0.892846		8.5005	0.883932		8.5005	0.889169		8.5005	0.881562		8.5004	0.889577		8.5005	0.878957		8.5005	0.885947		8.5005	0.87918		8.5005	0.882864		8.5004	0.880807		8.5004	0.881975		8.5005	0.880958
8.5504	0.890658		8.5505	0.877137		8.5505	0.89197		8.5504	0.876695		8.5504	0.888532		8.5505	0.882663		8.5505	0.890134		8.5505	0.87771		8.5504	0.8877		8.5505	0.881408		8.5505	0.886666		8.5505	0.879389		8.5505	0.879889		8.5504	0.877949		8.5504	0.878398		8.5505	0.877823
8.6004	0.889283		8.6005	0.878061		8.6005	0.889453		8.6004	0.875415		8.6004	0.89158		8.6005	0.881727		8.6005	0.888674		8.6005	0.884319		8.6005	0.888793		8.6005	0.881		8.6005	0.884473		8.6005	0.880271		8.6005	0.879169		8.6004	0.882084		8.6004	0.88086		8.6005	0.881956
8.6504	0.891321		8.6505	0.87898		8.6505	0.891631		8.6505	0.871059		8.6504	0.890925		8.6505	0.879633		8.6505	0.886386		8.6505	0.879863		8.6505	0.888593		8.6505	0.881324		8.6505	0.885184		8.6505	0.881133		8.6505	0.881657		8.6504	0.878676		8.6504	0.878854		8.6505	0.87848
8.7004	0.891027		8.7005	0.879167		8.7005	0.89178		8.7005	0.875622		8.7004	0.889502		8.7005	0.880224		8.7005	0.886888		8.7005	0.880292		8.7005	0.888244		8.7005	0.875857		8.7005	0.883368		8.7005	0.879109		8.7005	0.885298		8.7004	0.882228		8.7004	0.879434		8.7005	0.878647
8.7504	0.889509		8.7505	0.878045		8.7505	0.892507		8.7505	0.872647		8.7505	0.889193		8.7505	0.879781		8.7505	0.887553		8.7505	0.879045		8.7505	0.888773		8.7505	0.880871		8.7505	0.885789		8.7505	0.881326		8.7505	0.879461		8.7504	0.878682		8.7504	0.876322		8.7505	0.876912
8.8004	0.89157		8.8005	0.875475		8.8005	0.89147		8.8005	0.87663		8.8005	0.889755		8.8005	0.879351		8.8005	0.889497		8.8005	0.877366		8.8005	0.888891		8.8005	0.881771		8.8005	0.883579		8.8005	0.881337		8.8005	0.882625		8.8004	0.87999		8.8004	0.875571		8.8005	0.874582
8.8504	0.890266		8.8505	0.878103		8.8505	0.891257		8.8505	0.873684		8.8505	0.88993		8.8505	0.878989		8.8505	0.889145		8.8505	0.880363		8.8505	0.885182		8.8505	0.88237		8.8505	0.884262		8.8505	0.879384		8.8505	0.881161		8.8504	0.879428		8.8504	0.877642		8.8505	0.875272
8.9005	0.890237		8.9005	0.879128		8.9005	0.891166		8.9005	0.877188		8.9005	0.886103		8.9005	0.879525		8.9005	0.885247		8.9005	0.877399		8.9005	0.888451		8.9005	0.876933		8.9005	0.886759		8.9005	0.880001		8.9005	0.880324		8.9004	0.878369		8.9004	0.876036		8.9005	0.877344
8.9505	0.889182		8.9505	0.877368		8.9505	0.890308		8.9505	0.873339		8.9505	0.889712		8.9505	0.880404		8.9505	0.888476		8.9505	0.877584		8.9505	0.888672		8.9505	0.88056		8.9505	0.882934		8.9505	0.881782		8.9505	0.880692		8.9504	0.879855		8.9504	0.8772		8.9505	0.875557
9.0005	0.889165		9.0005	0.879742		9.0005	0.890441		9.0005	0.873167		9.0005	0.888913		9.0005	0.880477		9.0005	0.887284		9.0005	0.877076		9.0005	0.88646		9.0005	0.878949		9.0005	0.888521		9.0005	0.880627		9.0005	0.879332		9.0004	0.876275		9.0004	0.87739		9.0005	0.878677
9.0505	0.890208		9.0505	0.877871		9.0505	0.891448		9.0505	0.874781		9.0505	0.888737		9.0505	0.876711		9.0505	0.887962		9.0505	0.878796		9.0505	0.884466		9.0505	0.878171		9.0505	0.885061		9.0505	0.879595		9.0505	0.880018		9.0504	0.877818		9.0504	0.875633		9.0505	0.875625
9.1005	0.889254		9.1005	0.877793		9.1005	0.892427		9.1005	0.873171		9.1005	0.887116		9.1005	0.877726		9.1005	0.88976		9.1005	0.879248		9.1005	0.88561		9.1005	0.880307		9.1005	0.884235		9.1005	0.875976		9.1005	0.881151		9.1004	0.876831		9.1004	0.875994		9.1005	0.876135
9.1505	0.890198		9.1505	0.87666		9.1505	0.887876		9.1505	0.871881		9.1505	0.88859		9.1505	0.878867		9.1505	0.887343		9.1505	0.877748		9.1505	0.89035		9.1505	0.878408		9.1505	0.885945		9.1505	0.883202		9.1505	0.878751		9.1505	0.879596		9.1504	0.87882		9.1505	0.878013
9.2005	0.889136		9.2005	0.875558		9.2005	0.889006		9.2005	0.872196		9.2005	0.887533		9.2005	0.88155		9.2005	0.887074		9.2005	0.879576		9.2005	0.887177		9.2005	0.878251		9.2005	0.884504		9.2005	0.882983		9.2005	0.877553		9.2005	0.878948		9.2004	0.877472		9.2005	0.877687
9.2505	0.890645		9.2505	0.874938		9.2505	0.886933		9.2505	0.872215		9.2505	0.887969		9.2505	0.879086		9.2505	0.888564		9.2505	0.878785		9.2505	0.885082		9.2505	0.877313		9.2505	0.882022		9.2505	0.877174		9.2505	0.879109		9.2505	0.87768		9.2504	0.876993		9.2505	0.875665
9.3005	0.886167		9.3005	0.877775		9.3005	0.890595		9.3005	0.87614		9.3005	0.888991		9.3005	0.879629		9.3005	0.884887		9.3005	0.879639		9.3005	0.88749		9.3005	0.879461		9.3005	0.88555		9.3005	0.880038		9.3005	0.877746		9.3005	0.879691		9.3005	0.877498		9.3005	0.87828
9.3505	0.8872		9.3505	0.875035		9.3505	0.891891		9.3505	0.872676		9.3505	0.887985		9.3505	0.875689		9.3505	0.889389		9.3505	0.877659		9.3505	0.885802		9.3506	0.879646		9.3505	0.884544		9.3505	0.879924		9.3505	0.880105		9.3505	0.878035		9.3505	0.878121		9.3505	0.875878
9.4005	0.887909		9.4005	0.875472		9.4005	0.893788		9.4005	0.871483		9.4005	0.887991		9.4005	0.879204		9.4005	0.889166		9.4005	0.882476		9.4005	0.887117		9.4006	0.879045		9.4005	0.881714		9.4005	0.879204		9.4005	0.878698		9.4005	0.87998		9.4005	0.878036		9.4005	0.874249
9.4505	0.886607		9.4505	0.875191		9.4505	0.889745		9.4505	0.872411		9.4505	0.88982		9.4505	0.876936		9.4505	0.888021		9.4505	0.878114		9.4505	0.883997		9.4506	0.877264		9.4506	0.884093		9.4505	0.877993		9.4505	0.878149		9.4505	0.879775		9.4505	0.875161		9.4505	0.875797
9.5005	0.886724		9.5005	0.876743		9.5005	0.888996		9.5005	0.871991		9.5005	0.887389		9.5006	0.875428		9.5005	0.88862		9.5005	0.876584		9.5005	0.885004		9.5006	0.875546		9.5006	0.884791		9.5005	0.878726		9.5005	0.877781		9.5005	0.877613		9.5005	0.877023		9.5005	0.874611
9.5505	0.886883		9.5505	0.875982		9.5505	0.888803		9.5505	0.872407		9.5505	0.884817		9.5506	0.876538		9.5505	0.886393		9.5505	0.87723		9.5505	0.885075		9.5506	0.87813		9.5506	0.883942		9.5505	0.876236		9.5505	0.877513		9.5505	0.876438		9.5505	0.877894		9.5505	0.87446
9.6005	0.889226		9.6005	0.872397		9.6005	0.891423		9.6005	0.872602		9.6005	0.890072		9.6006	0.877397		9.6006	0.888273		9.6005	0.876154		9.6005	0.885109		9.6006	0.87532		9.6006	0.883175		9.6005	0.878251		9.6005	0.878028		9.6005	0.877652		9.6005	0.877176		9.6005	0.873917
9.6505	0.887386		9.6506	0.875021		9.6505	0.888909		9.6505	0.873276		9.6505	0.886015		9.6506	0.877762		9.6506	0.885987		9.6505	0.877013		9.6505	0.884187		9.6506	0.874816		9.6506	0.881473		9.6505	0.879607		9.6505	0.876543		9.6505	0.878856		9.6505	0.875843		9.6505	0.874904
9.7005	0.886067		9.7006	0.87467		9.7005	0.8892		9.7005	0.872876		9.7005	0.886695		9.7006	0.879714		9.7006	0.885301		9.7005	0.876081		9.7005	0.887593		9.7006	0.873084		9.7006	0.883377		9.7005	0.876452		9.7005	0.877875		9.7005	0.876549		9.7005	0.874649		9.7005	0.875114
9.7505	0.886683		9.7506	0.874154		9.7506	0.888641		9.7505	0.872297		9.7505	0.888357		9.7506	0.87692		9.7506	0.883828		9.7505	0.875107		9.7505	0.885325		9.7506	0.874477		9.7506	0.883521		9.7505	0.87624		9.7505	0.880679		9.7505	0.879475		9.7505	0.874243		9.7505	0.874542
9.8005	0.88547		9.8006	0.872961		9.8006	0.890164		9.8005	0.869236		9.8005	0.887546		9.8006	0.877899		9.8006	0.884992		9.8005	0.877672		9.8005	0.882579		9.8006	0.873747		9.8006	0.881314		9.8005	0.875398		9.8005	0.878698		9.8005	0.878561		9.8005	0.874039		9.8005	0.873515
9.8505	0.888278		9.8506	0.874883		9.8506	0.887025		9.8505	0.874027		9.8505	0.888588		9.8506	0.877291		9.8506	0.88715		9.8505	0.875429		9.8505	0.885427		9.8506	0.877082		9.8506	0.881524		9.8505	0.877451		9.8505	0.87444		9.8505	0.876385		9.8505	0.876015		9.8505	0.873804
9.9005	0.887185		9.9006	0.873664		9.9006	0.887769		9.9005	0.870111		9.9005	0.886181		9.9006	0.875404		9.9006	0.887046		9.9005	0.876567		9.9005	0.885493		9.9006	0.874902		9.9006	0.881958		9.9005	0.876172		9.9005	0.876317		9.9005	0.87766		9.9005	0.875903		9.9005	0.871628
9.9505	0.887266		9.9506	0.876491		9.9506	0.890195		9.9505	0.868577		9.9505	0.885969		9.9506	0.875532		9.9506	0.887401		9.9505	0.875555		9.9505	0.885148		9.9506	0.877162		9.9506	0.883994		9.9505	0.87775		9.9505	0.880875		9.9505	0.877359		9.9505	0.874558		9.9506	0.876739
10.0005	0.889616		10.0006	0.876415		10.0006	0.886808		10.0005	0.870218		10.0005	0.888533		10.0006	0.876068		10.0006	0.886788		10.0005	0.87486		10.0005	0.884667		10.0006	0.876506		10.0006	0.880864		10.0005	0.873378		10.0005	0.876216		10.0005	0.876889		10.0005	0.875168		10.0006	0.875016
10.0505	0.886371		10.0506	0.87404		10.0506	0.891093		10.0505	0.869816		10.0505	0.887176		10.0506	0.875758		10.0506	0.884206		10.0505	0.876269		10.0505	0.884662		10.0506	0.876823		10.0506	0.884035		10.0505	0.879721		10.0505	0.878005		10.0505	0.877375		10.0505	0.872378		10.0506	0.878485
10.1005	0.88922		10.1006	0.872963		10.1006	0.8876		10.1005	0.872336		10.1005	0.884531		10.1006	0.875946		10.1006	0.884603		10.1005	0.87316		10.1005	0.884675		10.1006	0.875704		10.1006	0.881481		10.1005	0.873825		10.1005	0.87684		10.1005	0.876788		10.1005	0.87544		10.1006	0.873077
10.1505	0.886674		10.1506	0.874524		10.1506	0.887808		10.1505	0.872016		10.1505	0.884292		10.1506	0.87729		10.1506	0.885063		10.1505	0.876888		10.1505	0.883938		10.1506	0.877133		10.1506	0.88149		10.1506	0.874746		10.1505	0.875854		10.1505	0.877041		10.1505	0.873389		10.1506	0.874355
10.2005	0.886251		10.2006	0.875356		10.2006	0.887164		10.2005	0.869422		10.2005	0.886191		10.2006	0.878484		10.2006	0.88389		10.2005	0.877676		10.2005	0.886484		10.2006	0.875026		10.2006	0.883881		10.2006	0.875286		10.2005	0.87838		10.2005	0.878405		10.2005	0.873314		10.2006	0.874099
10.2505	0.887374		10.2506	0.875392		10.2506	0.888592		10.2505	0.872558		10.2505	0.886075		10.2506	0.877258		10.2506	0.883626		10.2505	0.872365		10.2505	0.885298		10.2506	0.875833		10.2506	0.884399		10.2506	0.877301		10.2505	0.875338		10.2505	0.877755		10.2505	0.874429		10.2506	0.874529
10.3005	0.88665		10.3006	0.874108		10.3006	0.888061		10.3005	0.868035		10.3005	0.883841		10.3006	0.878931		10.3006	0.883875		10.3006	0.876309		10.3005	0.88253		10.3006	0.876411		10.3006	0.88031		10.3006	0.87636		10.3006	0.877186		10.3005	0.876762		10.3005	0.873877		10.3006	0.871041
10.3505	0.884921		10.3506	0.869938		10.3506	0.886772		10.3505	0.870986		10.3505	0.884342		10.3506	0.87349		10.3506	0.88678		10.3506	0.871719		10.3505	0.88457		10.3506	0.876264		10.3506	0.880312		10.3506	0.87329		10.3506	0.876473		10.3505	0.874953		10.3505	0.874371		10.3506	0.872111
10.4005	0.888512		10.4006	0.872106		10.4006	0.88812		10.4005	0.869024		10.4005	0.885816		10.4006	0.879288		10.4006	0.884526		10.4006	0.875567		10.4005	0.883665		10.4006	0.876368		10.4006	0.884261		10.4006	0.877474		10.4006	0.878854		10.4005	0.876356		10.4005	0.874423		10.4006	0.87529
10.4505	0.888777		10.4506	0.872431		10.4506	0.889309		10.4505	0.867005		10.4505	0.887816		10.4506	0.876519		10.4506	0.884387		10.4506	0.876137		10.4506	0.884553		10.4506	0.871712		10.4506	0.882382		10.4506	0.877086		10.4506	0.876302		10.4505	0.876989		10.4505	0.873443		10.4506	0.874374
10.5005	0.886199		10.5006	0.873876		10.5006	0.889709		10.5006	0.868935		10.5005	0.887701		10.5006	0.872092		10.5006	0.885051		10.5006	0.872828		10.5006	0.882773		10.5006	0.875632		10.5006	0.881422		10.5006	0.875601		10.5006	0.875741		10.5005	0.872792		10.5005	0.875055		10.5006	0.871156
10.5505	0.88847		10.5506	0.87167		10.5506	0.886871		10.5506	0.870983		10.5505	0.886915		10.5506	0.875816		10.5506	0.882415		10.5506	0.874936		10.5506	0.882452		10.5506	0.874077		10.5506	0.880382		10.5506	0.878403		10.5506	0.874876		10.5505	0.877468		10.5505	0.87377		10.5506	0.873713
10.6005	0.88528		10.6006	0.875719		10.6006	0.884891		10.6006	0.870353		10.6006	0.884091		10.6006	0.872806		10.6006	0.884664		10.6006	0.872835		10.6006	0.884429		10.6006	0.875914		10.6006	0.880135		10.6006	0.875898		10.6006	0.87411		10.6005	0.876808		10.6005	0.873947		10.6006	0.874367
10.6505	0.887105		10.6506	0.871943		10.6506	0.887492		10.6506	0.866747		10.6506	0.886493		10.6506	0.876868		10.6506	0.885728		10.6506	0.875438		10.6506	0.88483		10.6506	0.871612		10.6506	0.879689		10.6506	0.873118		10.6506	0.879222		10.6505	0.876349		10.6505	0.875366		10.6506	0.872385
10.7005	0.884954		10.7006	0.871228		10.7006	0.888422		10.7006	0.868669		10.7006	0.88305		10.7006	0.8766		10.7006	0.884265		10.7006	0.874641		10.7006	0.883546		10.7006	0.875015		10.7006	0.881278		10.7006	0.874009		10.7006	0.877059		10.7005	0.876301		10.7005	0.87203		10.7006	0.873269
10.7506	0.88413		10.7506	0.87025		10.7506	0.885377		10.7506	0.868029		10.7506	0.884109		10.7506	0.872012		10.7506	0.882488		10.7506	0.871762		10.7506	0.885829		10.7506	0.875195		10.7506	0.87869		10.7506	0.874973		10.7506	0.877249		10.7505	0.8759		10.7505	0.87232		10.7506	0.873472
10.8006	0.886107		10.8006	0.871305		10.8006	0.887623		10.8006	0.868782		10.8006	0.887883		10.8006	0.874582		10.8006	0.88262		10.8006	0.872598		10.8006	0.882738		10.8006	0.872496		10.8006	0.882935		10.8006	0.873539		10.8006	0.87464		10.8005	0.874801		10.8005	0.870542		10.8006	0.873293
10.8506	0.884778		10.8506	0.873145		10.8506	0.888184		10.8506	0.868516		10.8506	0.885282		10.8506	0.873839		10.8506	0.886148		10.8506	0.872347		10.8506	0.883397		10.8506	0.874245		10.8506	0.881233		10.8506	0.87391		10.8506	0.874278		10.8505	0.876112		10.8505	0.871724		10.8506	0.870311
10.9006	0.885043		10.9006	0.874313		10.9006	0.884291		10.9006	0.86995		10.9006	0.883122		10.9006	0.873469		10.9006	0.882947		10.9006	0.874845		10.9006	0.88152		10.9006	0.872928		10.9006	0.881967		10.9006	0.871743		10.9006	0.875184		10.9005	0.874497		10.9005	0.869935		10.9006	0.873952
10.9506	0.8856		10.9506	0.87006		10.9506	0.887658		10.9506	0.865168		10.9506	0.882429		10.9506	0.874553		10.9506	0.882285		10.9506	0.874237		10.9506	0.883319		10.9506	0.872391		10.9506	0.879129		10.9506	0.875023		10.9506	0.874761		10.9505	0.876587		10.9505	0.873573		10.9506	0.872756
11.0006	0.88451		11.0006	0.873879		11.0006	0.885445		11.0006	0.865941		11.0006	0.885766		11.0006	0.87411		11.0006	0.88113		11.0006	0.874663		11.0006	0.881592		11.0006	0.874432		11.0006	0.881378		11.0006	0.874879		11.0006	0.876445		11.0006	0.874448		11.0005	0.872916		11.0006	0.87071
11.0506	0.8868		11.0506	0.870833		11.0506	0.886242		11.0506	0.866811		11.0506	0.884125		11.0506	0.87697		11.0506	0.884596		11.0506	0.870498		11.0506	0.883985		11.0506	0.875931		11.0506	0.879679		11.0506	0.87336		11.0506	0.875168		11.0506	0.872588		11.0505	0.875879		11.0506	0.872522
11.1006	0.88413		11.1006	0.870737		11.1006	0.887255		11.1006	0.870029		11.1006	0.883725		11.1006	0.87137		11.1006	0.882875		11.1006	0.870912		11.1006	0.882153		11.1006	0.872414		11.1006	0.878395		11.1006	0.875738		11.1006	0.874048		11.1006	0.872788		11.1006	0.871219		11.1006	0.874724
11.1506	0.882346		11.1506	0.868706		11.1506	0.885082		11.1506	0.868073		11.1506	0.884126		11.1506	0.873863		11.1506	0.882458		11.1506	0.876415		11.1506	0.882303		11.1506	0.875043		11.1506	0.880596		11.1506	0.872869		11.1506	0.874624		11.1506	0.87487		11.1506	0.86988		11.1506	0.875866
11.2006	0.884055		11.2006	0.871986		11.2006	0.885856		11.2006	0.867593		11.2006	0.883006		11.2006	0.87465		11.2006	0.884121		11.2006	0.875798		11.2006	0.881031		11.2007	0.87553		11.2006	0.880989		11.2006	0.874127		11.2006	0.873962		11.2006	0.874908		11.2006	0.872449		11.2006	0.873453
11.2506	0.882082		11.2506	0.869884		11.2506	0.887244		11.2506	0.866174		11.2506	0.881779		11.2506	0.874531		11.2506	0.883819		11.2506	0.872981		11.2506	0.881409		11.2507	0.872698		11.2506	0.881614		11.2506	0.870977		11.2506	0.872145		11.2506	0.874548		11.2506	0.871556		11.2506	0.873807
11.3006	0.88686		11.3006	0.870107		11.3006	0.888413		11.3006	0.866486		11.3006	0.883912		11.3007	0.874079		11.3006	0.884786		11.3006	0.868982		11.3006	0.883202		11.3007	0.869506		11.3007	0.878235		11.3006	0.872975		11.3006	0.874612		11.3006	0.872981		11.3006	0.870807		11.3006	0.873525
11.3506	0.886786		11.3506	0.871459		11.3506	0.886404		11.3506	0.867956		11.3506	0.879518		11.3507	0.875119		11.3506	0.883988		11.3506	0.870674		11.3506	0.880649		11.3507	0.876181		11.3507	0.877476		11.3506	0.871611		11.3506	0.873522		11.3506	0.872855		11.3506	0.870897		11.3506	0.871259
11.4006	0.885762		11.4006	0.870936		11.4006	0.889394		11.4006	0.870223		11.4006	0.882429		11.4007	0.872403		11.4007	0.88486		11.4006	0.870142		11.4006	0.883096		11.4007	0.872638		11.4007	0.880147		11.4006	0.87535		11.4006	0.875206		11.4006	0.875611		11.4006	0.870948		11.4006	0.871181
11.4506	0.88156		11.4507	0.870826		11.4506	0.883579		11.4506	0.866054		11.4506	0.883433		11.4507	0.874893		11.4507	0.88384		11.4506	0.870743		11.4506	0.880338		11.4507	0.873871		11.4507	0.880029		11.4506	0.871032		11.4506	0.874216		11.4506	0.875035		11.4506	0.869379		11.4506	0.871471
11.5006	0.884951		11.5007	0.870101		11.5006	0.888258		11.5006	0.869111		11.5006	0.882452		11.5007	0.872754		11.5007	0.884803		11.5006	0.87302		11.5006	0.882983		11.5007	0.873285		11.5007	0.874757		11.5006	0.874862		11.5006	0.872334		11.5006	0.871304		11.5006	0.868361		11.5006	0.872814
11.5506	0.885173		11.5507	0.87047		11.5506	0.886781		11.5506	0.865677		11.5506	0.882703		11.5507	0.872055		11.5507	0.883827		11.5506	0.87432		11.5506	0.883618		11.5507	0.869665		11.5507	0.879977		11.5506	0.874907		11.5506	0.877208		11.5506	0.871995		11.5506	0.871053		11.5506	0.871051
11.6006	0.881445		11.6007	0.870574		11.6007	0.887193		11.6006	0.867492		11.6006	0.883294		11.6007	0.870328		11.6007	0.880758		11.6006	0.870117		11.6006	0.884055		11.6007	0.870815		11.6007	0.880752		11.6006	0.875476		11.6006	0.875122		11.6006	0.874749		11.6006	0.870843		11.6006	0.869505
11.6506	0.884281		11.6507	0.869341		11.6507	0.883886		11.6506	0.868988		11.6506	0.881139		11.6507	0.874076		11.6507	0.878756		11.6506	0.872088		11.6506	0.8831		11.6507	0.876014		11.6507	0.880447		11.6506	0.874837		11.6506	0.873205		11.6506	0.871533		11.6506	0.869689		11.6506	0.868981
11.7006	0.884734		11.7007	0.866892		11.7007	0.884488		11.7006	0.866014		11.7006	0.88287		11.7007	0.872496		11.7007	0.88457		11.7006	0.870137		11.7006	0.88172		11.7007	0.874619		11.7007	0.879275		11.7006	0.874619		11.7006	0.871942		11.7006	0.874495		11.7006	0.872583		11.7006	0.87083
11.7506	0.885181		11.7507	0.872559		11.7507	0.884118		11.7506	0.865556		11.7506	0.88231		11.7507	0.873091		11.7507	0.88524		11.7506	0.870046		11.7506	0.88192		11.7507	0.873763		11.7507	0.879727		11.7506	0.873986		11.7506	0.87361		11.7506	0.876068		11.7506	0.867025		11.7506	0.868104
11.8006	0.883482		11.8007	0.86914		11.8007	0.884484		11.8006	0.865742		11.8006	0.883944		11.8007	0.872639		11.8007	0.882364		11.8006	0.871108		11.8006	0.88287		11.8007	0.872336		11.8007	0.880279		11.8006	0.872938		11.8006	0.870951		11.8006	0.877923		11.8006	0.871237		11.8007	0.872817
11.8506	0.886472		11.8507	0.870988		11.8507	0.882129		11.8506	0.86601		11.8506	0.88434		11.8507	0.871685		11.8507	0.885435		11.8506	0.870997		11.8506	0.881722		11.8507	0.870999		11.8507	0.879011		11.8506	0.873777		11.8506	0.874009		11.8506	0.869563		11.8506	0.870972		11.8507	0.870966
11.9006	0.884884		11.9007	0.870247		11.9007	0.88368		11.9006	0.866906		11.9006	0.883178		11.9007	0.872604		11.9007	0.883257		11.9006	0.869716		11.9006	0.882052		11.9007	0.870751		11.9007	0.879427		11.9006	0.872358		11.9006	0.871396		11.9006	0.874353		11.9006	0.870683		11.9007	0.870947
11.9506	0.884549		11.9507	0.868018		11.9507	0.884547		11.9506	0.867725		11.9506	0.88197		11.9507	0.869651		11.9507	0.879595		11.9506	0.87142		11.9506	0.8824		11.9507	0.871813		11.9507	0.877826		11.9506	0.870449		11.9506	0.872005		11.9506	0.873245		11.9506	0.870483		11.9507	0.868227
12.0006	0.883429		12.0007	0.868218		12.0007	0.88549		12.0006	0.86665		12.0006	0.883237		12.0007	0.873982		12.0007	0.881407		12.0006	0.868923		12.0006	0.879419		12.0007	0.869103		12.0007	0.878856		12.0007	0.871258		12.0006	0.872232		12.0006	0.873806		12.0006	0.869583		12.0007	0.869247
12.0506	0.881913		12.0507	0.869299		12.0507	0.885154		12.0506	0.868185		12.0506	0.882039		12.0507	0.872653		12.0507	0.880274		12.0506	0.872877		12.0506	0.879046		12.0507	0.868993		12.0507	0.87786		12.0507	0.872123		12.0506	0.875797		12.0506	0.870008		12.0506	0.870103		12.0507	0.870927
12.1006	0.882101		12.1007	0.870424		12.1007	0.88364		12.1006	0.866817		12.1006	0.88428		12.1007	0.870476		12.1007	0.881843		12.1006	0.870178		12.1006	0.879643		12.1007	0.871654		12.1007	0.879742		12.1007	0.872938		12.1007	0.873454		12.1006	0.872081		12.1006	0.870835		12.1007	0.872725
12.1506	0.88384		12.1507	0.865814		12.1507	0.886749		12.1506	0.862982		12.1506	0.880296		12.1507	0.872515		12.1507	0.881907		12.1507	0.872237		12.1506	0.882274		12.1507	0.872349		12.1507	0.87508		12.1507	0.870444		12.1507	0.870773		12.1506	0.873795		12.1506	0.870461		12.1507	0.870114
12.2006	0.884559		12.2007	0.866958		12.2007	0.885801		12.2006	0.868173		12.2006	0.884947		12.2007	0.871822		12.2007	0.881969		12.2007	0.870448		12.2006	0.880878		12.2007	0.870365		12.2007	0.878434		12.2007	0.872202		12.2007	0.875325		12.2006	0.872122		12.2006	0.8704		12.2007	0.871744
12.2506	0.882573		12.2507	0.867809		12.2507	0.882857		12.2506	0.867534		12.2506	0.881121		12.2507	0.87261		12.2507	0.880195		12.2507	0.870371		12.2507	0.879899		12.2507	0.871198		12.2507	0.876513		12.2507	0.870504		12.2507	0.874611		12.2506	0.873341		12.2506	0.869252		12.2507	0.870163
12.3006	0.882635		12.3007	0.86778		12.3007	0.885574		12.3007	0.865941		12.3006	0.881304		12.3007	0.872085		12.3007	0.88217		12.3007	0.870832		12.3007	0.880182		12.3007	0.869771		12.3007	0.88045		12.3007	0.870215		12.3007	0.874102		12.3006	0.8721		12.3006	0.872224		12.3007	0.87148
12.3506	0.885838		12.3507	0.868418		12.3507	0.886619		12.3507	0.867765		12.3506	0.884119		12.3507	0.87228		12.3507	0.882183		12.3507	0.867468		12.3507	0.880346		12.3507	0.870701		12.3507	0.875773		12.3507	0.870367		12.3507	0.872731		12.3506	0.876434		12.3506	0.870915		12.3507	0.868919
12.4006	0.882382		12.4007	0.86797		12.4007	0.885442		12.4007	0.865669		12.4007	0.884179		12.4007	0.872214		12.4007	0.879714		12.4007	0.872473		12.4007	0.880736		12.4007	0.871097		12.4007	0.880578		12.4007	0.869633		12.4007	0.872421		12.4006	0.871591		12.4006	0.866828		12.4007	0.869262
12.4506	0.881841		12.4507	0.867136		12.4507	0.885958		12.4507	0.8638		12.4507	0.883787		12.4507	0.868698		12.4507	0.880713		12.4507	0.873225		12.4507	0.879451		12.4507	0.870872		12.4507	0.880205		12.4507	0.870191		12.4507	0.871932		12.4506	0.874059		12.4506	0.870611		12.4507	0.866615
12.5006	0.88053		12.5007	0.869972		12.5007	0.886738		12.5007	0.865813		12.5007	0.883624		12.5007	0.871985		12.5007	0.880306		12.5007	0.870224		12.5007	0.881229		12.5007	0.870191		12.5007	0.874929		12.5007	0.867593		12.5007	0.871861		12.5006	0.870995		12.5006	0.866547		12.5007	0.869816
12.5507	0.883423		12.5507	0.866879		12.5507	0.885567		12.5507	0.866038		12.5507	0.882218		12.5507	0.870384		12.5507	0.882054		12.5507	0.870813		12.5507	0.880783		12.5507	0.869634		12.5507	0.876922		12.5507	0.871007		12.5507	0.876113		12.5506	0.873454		12.5506	0.870447		12.5507	0.869014
12.6007	0.879811		12.6007	0.868458		12.6007	0.883708		12.6007	0.867101		12.6007	0.881515		12.6007	0.872729		12.6007	0.87635		12.6007	0.870649		12.6007	0.882783		12.6007	0.872249		12.6007	0.878116		12.6007	0.870529		12.6007	0.872644		12.6006	0.871035		12.6006	0.868629		12.6007	0.86978
12.6507	0.881897		12.6507	0.868508		12.6507	0.884221		12.6507	0.86492		12.6507	0.879173		12.6507	0.870334		12.6507	0.880246		12.6507	0.868644		12.6507	0.88165		12.6507	0.873286		12.6507	0.877045		12.6507	0.873225		12.6507	0.872514		12.6506	0.871049		12.6506	0.869056		12.6507	0.870504
12.7007	0.882642		12.7007	0.867571		12.7007	0.882811		12.7007	0.865975		12.7007	0.880991		12.7007	0.870916		12.7007	0.881884		12.7007	0.869434		12.7007	0.88055		12.7007	0.871675		12.7007	0.877822		12.7007	0.871118		12.7007	0.873533		12.7006	0.872239		12.7006	0.870825		12.7007	0.866483
12.7507	0.883164		12.7507	0.86859		12.7507	0.884688		12.7507	0.865023		12.7507	0.881409		12.7507	0.868231		12.7507	0.878712		12.7507	0.872689		12.7507	0.881402		12.7507	0.871509		12.7507	0.87713		12.7507	0.872643		12.7507	0.87224		12.7506	0.87077		12.7506	0.868917		12.7507	0.867415
12.8007	0.88092		12.8007	0.865971		12.8007	0.883779		12.8007	0.864839		12.8007	0.880148		12.8007	0.873084		12.8007	0.877967		12.8007	0.867553		12.8007	0.881134		12.8007	0.872417		12.8007	0.87614		12.8007	0.874097		12.8007	0.872035		12.8007	0.868815		12.8006	0.867681		12.8007	0.86787
12.8507	0.885548		12.8507	0.870682		12.8507	0.883895		12.8507	0.861387		12.8507	0.882107		12.8507	0.869304		12.8507	0.880105		12.8507	0.870571		12.8507	0.880168		12.8507	0.867431		12.8507	0.879795		12.8507	0.872561		12.8507	0.873112		12.8507	0.872229		12.8506	0.869593		12.8507	0.868497
12.9007	0.882922		12.9007	0.868827		12.9007	0.882501		12.9007	0.864989		12.9007	0.881349		12.9007	0.869845		12.9007	0.879736		12.9007	0.870322		12.9007	0.883697		12.9007	0.86842		12.9007	0.877023		12.9007	0.871161		12.9007	0.870295		12.9007	0.870603		12.9006	0.870274		12.9007	0.867962
12.9507	0.883566		12.9507	0.867653		12.9507	0.886253		12.9507	0.863021		12.9507	0.880982		12.9507	0.87176		12.9507	0.882661		12.9507	0.868408		12.9507	0.880465		12.9507	0.868803		12.9507	0.877455		12.9507	0.870217		12.9507	0.870946		12.9507	0.871576		12.9507	0.871152		12.9507	0.869804
13.0007	0.881305		13.0007	0.867155		13.0007	0.883196		13.0007	0.861035		13.0007	0.879086		13.0007	0.869369		13.0007	0.88125		13.0007	0.870595		13.0007	0.87931		13.0008	0.872838		13.0007	0.87876		13.0007	0.869322		13.0007	0.872701		13.0007	0.86794		13.0007	0.869611		13.0007	0.868152
13.0507	0.884431		13.0507	0.866002		13.0507	0.885886		13.0507	0.862761		13.0507	0.881049		13.0507	0.869784		13.0507	0.879132		13.0507	0.869159		13.0507	0.880448		13.0508	0.871638		13.0507	0.877477		13.0507	0.869986		13.0507	0.872187		13.0507	0.872262		13.0507	0.868961		13.0507	0.86774
13.1007	0.882388		13.1007	0.86856		13.1007	0.884106		13.1007	0.863606		13.1007	0.880252		13.1007	0.87229		13.1007	0.88103		13.1007	0.868506		13.1007	0.880124		13.1008	0.869689		13.1008	0.872443		13.1007	0.871186		13.1007	0.87221		13.1007	0.870905		13.1007	0.867079		13.1007	0.870634
13.1507	0.883913		13.1507	0.866493		13.1507	0.881865		13.1507	0.864318		13.1507	0.879645		13.1508	0.868211		13.1507	0.880287		13.1507	0.869727		13.1507	0.879233		13.1508	0.872173		13.1508	0.87685		13.1507	0.872067		13.1507	0.872505		13.1507	0.86795		13.1507	0.868879		13.1507	0.870009
13.2007	0.879253		13.2007	0.867684		13.2007	0.883982		13.2007	0.862224		13.2007	0.88028		13.2008	0.872452		13.2007	0.881283		13.2007	0.870961		13.2007	0.881443		13.2008	0.871108		13.2008	0.878449		13.2007	0.869538		13.2007	0.872848		13.2007	0.870331		13.2007	0.869487		13.2007	0.867311
13.2507	0.883975		13.2507	0.863854		13.2507	0.880485		13.2507	0.864878		13.2507	0.880931		13.2508	0.869344		13.2508	0.881466		13.2507	0.870508		13.2507	0.880061		13.2508	0.869332		13.2508	0.878136		13.2507	0.871798		13.2507	0.870579		13.2507	0.870397		13.2507	0.870774		13.2507	0.866164
13.3007	0.882418		13.3008	0.864081		13.3007	0.882168		13.3007	0.863928		13.3007	0.881083		13.3008	0.869558		13.3008	0.87782		13.3007	0.870094		13.3007	0.882985		13.3008	0.866889		13.3008	0.877703		13.3007	0.872558		13.3007	0.871685		13.3007	0.870649		13.3007	0.874532		13.3007	0.868677
13.3507	0.881227		13.3508	0.864456		13.3507	0.882194		13.3507	0.861615		13.3507	0.881658		13.3508	0.868465		13.3508	0.880198		13.3507	0.869048		13.3507	0.879084		13.3508	0.869255		13.3508	0.877864		13.3507	0.868994		13.3507	0.871424		13.3507	0.872722		13.3507	0.869767		13.3507	0.868603
13.4007	0.880971		13.4008	0.864237		13.4008	0.882774		13.4007	0.863749		13.4007	0.881946		13.4008	0.867477		13.4008	0.878074		13.4007	0.871427		13.4007	0.877886		13.4008	0.86924		13.4008	0.875473		13.4007	0.870067		13.4007	0.874312		13.4007	0.87153		13.4007	0.868165		13.4007	0.867977
13.4507	0.882062		13.4508	0.869502		13.4508	0.88375		13.4507	0.860761		13.4507	0.878111		13.4508	0.868594		13.4508	0.881598		13.4507	0.870747		13.4507	0.881621		13.4508	0.871955		13.4508	0.87713		13.4507	0.869909		13.4507	0.869987		13.4507	0.873212		13.4507	0.867657		13.4507	0.869328
13.5007	0.883515		13.5008	0.866022		13.5008	0.883086		13.5007	0.865117		13.5007	0.882936		13.5008	0.870756		13.5008	0.879621		13.5007	0.8659		13.5007	0.879042		13.5008	0.871227		13.5008	0.878866		13.5007	0.870565		13.5007	0.870211		13.5007	0.873726		13.5007	0.869059		13.5007	0.866307
13.5507	0.881907		13.5508	0.862829		13.5508	0.884248		13.5507	0.865069		13.5507	0.881544		13.5508	0.869384		13.5508	0.878172		13.5507	0.867768		13.5507	0.879764		13.5508	0.871316		13.5508	0.873694		13.5507	0.871489		13.5507	0.870619		13.5507	0.869895		13.5507	0.868244		13.5507	0.8698
13.6007	0.879863		13.6008	0.866786		13.6008	0.886278		13.6007	0.863659		13.6007	0.882246		13.6008	0.867446		13.6008	0.87987		13.6007	0.868079		13.6007	0.880664		13.6008	0.870462		13.6008	0.876253		13.6007	0.870475		13.6007	0.871098		13.6007	0.869573		13.6007	0.869263		13.6008	0.870237
13.6507	0.881641		13.6508	0.865954		13.6508	0.881687		13.6507	0.868124		13.6507	0.880046		13.6508	0.871288		13.6508	0.880781		13.6507	0.867791		13.6507	0.880991		13.6508	0.868804		13.6508	0.876934		13.6507	0.870166		13.6507	0.868869		13.6507	0.869565		13.6507	0.867881		13.6508	0.867832
13.7007	0.88325		13.7008	0.866244		13.7008	0.883688		13.7007	0.862645		13.7007	0.879964		13.7008	0.867618		13.7008	0.879571		13.7007	0.868961		13.7007	0.881867		13.7008	0.870406		13.7008	0.875343		13.7007	0.87134		13.7007	0.871061		13.7007	0.871841		13.7007	0.870445		13.7008	0.866536
13.7507	0.880275		13.7508	0.865965		13.7508	0.882452		13.7507	0.865335		13.7507	0.88049		13.7508	0.869965		13.7508	0.878336		13.7507	0.868901		13.7507	0.878567		13.7508	0.867627		13.7508	0.876329		13.7507	0.869497		13.7507	0.869823		13.7507	0.869627		13.7507	0.868779		13.7508	0.867543
13.8007	0.880659		13.8008	0.865217		13.8008	0.880954		13.8007	0.865765		13.8007	0.879355		13.8008	0.870361		13.8008	0.877253		13.8007	0.870265		13.8007	0.87962		13.8008	0.868711		13.8008	0.877615		13.8008	0.872013		13.8007	0.870592		13.8007	0.872535		13.8007	0.867714		13.8008	0.866859
13.8507	0.87978		13.8508	0.86449		13.8508	0.881419		13.8507	0.867307		13.8507	0.88265		13.8508	0.868779		13.8508	0.878575		13.8507	0.867602		13.8507	0.878616		13.8508	0.866465		13.8508	0.873713		13.8508	0.869135		13.8507	0.869584		13.8507	0.870091		13.8507	0.868243		13.8508	0.869758
13.9007	0.880439		13.9008	0.86661		13.9008	0.881091		13.9007	0.86231		13.9007	0.880684		13.9008	0.870061		13.9008	0.877973		13.9007	0.868139		13.9007	0.88009		13.9008	0.870664		13.9008	0.874989		13.9008	0.870521		13.9007	0.871704		13.9007	0.870627		13.9007	0.87089		13.9008	0.867092
13.9507	0.881891		13.9508	0.867591		13.9508	0.881879		13.9507	0.863518		13.9507	0.878466		13.9508	0.866586		13.9508	0.881071		13.9508	0.866133		13.9507	0.877784		13.9508	0.871029		13.9508	0.875527		13.9508	0.871892		13.9508	0.871549		13.9507	0.869		13.9507	0.867376		13.9508	0.86609
14.0007	0.88209		14.0008	0.865901		14.0008	0.88378		14.0007	0.865327		14.0007	0.879873		14.0008	0.867808		14.0008	0.881462		14.0008	0.868634		14.0007	0.879352		14.0008	0.867392		14.0008	0.875499		14.0008	0.869227		14.0008	0.872054		14.0007	0.87282		14.0007	0.865302		14.0008	0.867915
14.0507	0.884334		14.0508	0.864561		14.0508	0.881821		14.0507	0.862084		14.0507	0.880837		14.0508	0.869155		14.0508	0.879326		14.0508	0.86575		14.0507	0.87859		14.0508	0.867444		14.0508	0.873855		14.0508	0.8692		14.0508	0.86995		14.0507	0.869578		14.0507	0.865666		14.0508	0.867024
14.1007	0.880895		14.1008	0.864202		14.1008	0.879061		14.1007	0.86384		14.1007	0.881228		14.1008	0.868792		14.1008	0.877229		14.1008	0.867659		14.1008	0.879774		14.1008	0.869528		14.1008	0.878035		14.1008	0.868293		14.1008	0.871352		14.1007	0.870112		14.1007	0.866831		14.1008	0.865984
14.1507	0.881181		14.1508	0.865608		14.1508	0.884014		14.1508	0.862357		14.1507	0.87908		14.1508	0.869		14.1508	0.878926		14.1508	0.870059		14.1508	0.877449		14.1508	0.869557		14.1508	0.875457		14.1508	0.870625		14.1508	0.867525		14.1507	0.873		14.1507	0.870391		14.1508	0.867798
14.2007	0.880665		14.2008	0.866255		14.2008	0.880211		14.2008	0.863626		14.2007	0.881055		14.2008	0.868907		14.2008	0.878919		14.2008	0.866191		14.2008	0.879636		14.2008	0.868718		14.2008	0.875174		14.2008	0.871314		14.2008	0.869452		14.2007	0.870074		14.2007	0.871151		14.2008	0.867391
14.2507	0.882978		14.2508	0.865026		14.2508	0.880119		14.2508	0.859675		14.2508	0.877814		14.2508	0.868805		14.2508	0.878595		14.2508	0.868523		14.2508	0.877458		14.2508	0.86873		14.2508	0.875228		14.2508	0.868313		14.2508	0.871907		14.2507	0.870748		14.2507	0.870321		14.2508	0.865098
14.3007	0.882481		14.3008	0.866361		14.3008	0.881559		14.3008	0.861985		14.3008	0.880288		14.3008	0.867248		14.3008	0.879469		14.3008	0.866136		14.3008	0.880503		14.3008	0.867554		14.3008	0.877129		14.3008	0.868202		14.3008	0.870822		14.3007	0.87056		14.3007	0.866311		14.3008	0.870087
14.3507	0.878597		14.3508	0.86804		14.3508	0.882441		14.3508	0.862184		14.3508	0.876935		14.3508	0.868142		14.3508	0.878124		14.3508	0.865757		14.3508	0.877643		14.3508	0.868566		14.3508	0.875017		14.3508	0.87098		14.3508	0.871669		14.3507	0.872916		14.3507	0.868925		14.3508	0.868166
14.4008	0.880896		14.4008	0.865874		14.4008	0.882729		14.4008	0.863072		14.4008	0.87987		14.4008	0.868195		14.4008	0.876192		14.4008	0.865522		14.4008	0.877246		14.4008	0.866603		14.4008	0.878136		14.4008	0.87246		14.4008	0.871868		14.4007	0.869338		14.4007	0.870591		14.4008	0.866268
14.4508	0.882375		14.4508	0.865646		14.4508	0.879585		14.4508	0.863709		14.4508	0.880911		14.4508	0.86531		14.4508	0.878055		14.4508	0.868394		14.4508	0.878577		14.4508	0.868206		14.4508	0.8761		14.4508	0.868631		14.4508	0.869376		14.4507	0.87288		14.4507	0.86498		14.4508	0.868623
14.5008	0.879917		14.5008	0.867581		14.5008	0.880939		14.5008	0.860434		14.5008	0.87753		14.5008	0.867795		14.5008	0.879407		14.5008	0.867778		14.5008	0.877528		14.5008	0.868713		14.5008	0.874906		14.5008	0.868463		14.5008	0.869914		14.5007	0.868628		14.5007	0.868019		14.5008	0.867856
14.5508	0.880848		14.5508	0.863512		14.5508	0.882755		14.5508	0.8636		14.5508	0.879251		14.5508	0.8648		14.5508	0.880264		14.5508	0.866429		14.5508	0.881576		14.5508	0.869933		14.5508	0.877072		14.5508	0.866862		14.5508	0.869658		14.5507	0.869375		14.5507	0.867416		14.5508	0.864831
14.6008	0.882467		14.6008	0.863641		14.6008	0.879678		14.6008	0.863268		14.6008	0.879339		14.6008	0.865154		14.6008	0.879008		14.6008	0.867417		14.6008	0.880665		14.6008	0.866841		14.6008	0.875673		14.6008	0.870552		14.6008	0.868728		14.6007	0.86991		14.6007	0.868684		14.6008	0.866281
14.6508	0.880769		14.6508	0.866162		14.6508	0.880927		14.6508	0.863599		14.6508	0.878572		14.6508	0.869625		14.6508	0.875154		14.6508	0.868911		14.6508	0.878193		14.6508	0.868959		14.6508	0.873987		14.6508	0.86648		14.6508	0.869271		14.6508	0.867049		14.6507	0.867877		14.6508	0.868245
14.7008	0.879683		14.7008	0.863731		14.7008	0.88222		14.7008	0.861877		14.7008	0.87782		14.7008	0.86657		14.7008	0.876824		14.7008	0.86662		14.7008	0.8797		14.7008	0.86954		14.7008	0.873147		14.7008	0.871136		14.7008	0.867934		14.7008	0.87069		14.7007	0.866177		14.7008	0.86766
14.7508	0.881533		14.7508	0.868611		14.7508	0.883383		14.7508	0.86042		14.7508	0.880134		14.7508	0.86951		14.7508	0.877229		14.7508	0.868202		14.7508	0.876494		14.7508	0.86843		14.7508	0.875919		14.7508	0.867283		14.7508	0.869532		14.7508	0.871076		14.7508	0.868984		14.7508	0.867859
14.8008	0.880954		14.8008	0.862404		14.8008	0.879979		14.8008	0.863386		14.8008	0.87863		14.8008	0.867716		14.8008	0.87942		14.8008	0.869486		14.8008	0.87839		14.8008	0.866519		14.8008	0.874116		14.8008	0.868687		14.8008	0.866869		14.8008	0.868268		14.8008	0.866319		14.8008	0.86755
14.8508	0.878772		14.8508	0.861079		14.8508	0.880717		14.8508	0.860593		14.8508	0.879181		14.8508	0.865437		14.8508	0.878415		14.8508	0.866049		14.8508	0.877205		14.8509	0.867134		14.8508	0.874387		14.8508	0.868877		14.8508	0.868559		14.8508	0.86874		14.8508	0.867189		14.8508	0.866536
14.9008	0.880989		14.9008	0.86412		14.9008	0.881664		14.9008	0.862408		14.9008	0.877557		14.9008	0.866834		14.9008	0.877328		14.9008	0.866991		14.9008	0.879433		14.9009	0.866513		14.9008	0.875532		14.9008	0.870151		14.9008	0.867049		14.9008	0.873863		14.9008	0.867384		14.9008	0.865806
14.9508	0.880654		14.9508	0.86601		14.9508	0.881878		14.9508	0.861551		14.9508	0.877763		14.9509	0.866491		14.9508	0.879132		14.9508	0.86841		14.9508	0.877417		14.9509	0.86565		14.9509	0.875027		14.9508	0.866018		14.9508	0.869994		14.9508	0.869873		14.9508	0.868855		14.9508	0.86546
15.0008	0.88206		15.0008	0.865185		15.0008	0.881937		15.0008	0.861193		15.0008	0.879895		15.0009	0.866509		15.0008	0.880179		15.0008	0.865426		15.0008	0.879795		15.0009	0.865716		15.0009	0.876161		15.0008	0.868805		15.0008	0.869994		15.0008	0.872966		15.0008	0.868867		15.0008	0.869059
15.0508	0.879842		15.0508	0.865367		15.0508	0.882421		15.0508	0.862394		15.0508	0.8757		15.0509	0.866939		15.0509	0.877057		15.0508	0.865987		15.0508	0.878888		15.0509	0.865538		15.0509	0.873772		15.0508	0.869923		15.0508	0.868723		15.0508	0.866561		15.0508	0.866915		15.0508	0.866412
15.1008	0.876885		15.1009	0.865522		15.1008	0.883033		15.1008	0.861237		15.1008	0.881525		15.1009	0.86823		15.1009	0.8759		15.1008	0.868761		15.1008	0.878074		15.1009	0.866948		15.1009	0.875126		15.1008	0.867747		15.1008	0.869574		15.1008	0.871545		15.1008	0.868745		15.1008	0.866894
15.1508	0.880139		15.1509	0.86351		15.1508	0.880742		15.1508	0.860053		15.1508	0.877119		15.1509	0.864095		15.1509	0.877376		15.1508	0.865992		15.1508	0.877352		15.1509	0.869338		15.1509	0.876284		15.1508	0.869971		15.1508	0.868606		15.1508	0.871449		15.1508	0.86731		15.1508	0.866431
15.2008	0.880464		15.2009	0.862261		15.2008	0.880826		15.2008	0.862162		15.2008	0.878909		15.2009	0.867055		15.2009	0.877817		15.2008	0.867588		15.2008	0.87956		15.2009	0.86916		15.2009	0.87142		15.2008	0.870117		15.2008	0.868308		15.2008	0.865755		15.2008	0.870978		15.2008	0.864589
15.2508	0.880201		15.2509	0.864226		15.2509	0.880637		15.2508	0.86113		15.2508	0.882218		15.2509	0.866808		15.2509	0.875707		15.2508	0.86487		15.2508	0.877885		15.2509	0.867361		15.2509	0.875231		15.2508	0.867578		15.2508	0.871909		15.2508	0.865727		15.2508	0.867763		15.2508	0.86925
15.3008	0.879056		15.3009	0.86417		15.3009	0.880111		15.3008	0.864466		15.3008	0.880313		15.3009	0.866738		15.3009	0.875422		15.3008	0.866174		15.3008	0.877083		15.3009	0.863373		15.3009	0.876451		15.3008	0.867828		15.3008	0.868522		15.3008	0.868873		15.3008	0.8692		15.3008	0.863919
15.3508	0.877609		15.3509	0.863661		15.3509	0.881651		15.3508	0.861928		15.3508	0.876876		15.3509	0.863898		15.3509	0.878963		15.3508	0.866753		15.3508	0.880439		15.3509	0.867943		15.3509	0.875397		15.3508	0.868474		15.3508	0.868892		15.3508	0.867804		15.3508	0.867519		15.3508	0.867804
15.4008	0.87823		15.4009	0.862519		15.4009	0.882591		15.4008	0.861238		15.4008	0.878919		15.4009	0.869728		15.4009	0.878961		15.4008	0.867243		15.4008	0.879745		15.4009	0.86882		15.4009	0.871765		15.4008	0.867239		15.4008	0.868623		15.4008	0.867403		15.4008	0.869001		15.4008	0.865522
15.4508	0.880979		15.4509	0.863651		15.4509	0.881541		15.4508	0.86191		15.4508	0.878709		15.4509	0.866289		15.4509	0.87635		15.4508	0.867501		15.4508	0.877591		15.4509	0.865838		15.4509	0.874308		15.4508	0.86797		15.4508	0.868948		15.4508	0.872344		15.4508	0.86509		15.4509	0.865697
15.5008	0.8789		15.5009	0.865664		15.5009	0.882049		15.5008	0.860786		15.5008	0.879522		15.5009	0.86757		15.5009	0.877527		15.5008	0.867894		15.5008	0.878184		15.5009	0.864668		15.5009	0.873008		15.5008	0.867386		15.5008	0.87165		15.5008	0.866965		15.5008	0.86327		15.5009	0.866933
15.5508	0.879532		15.5509	0.861358		15.5509	0.879585		15.5508	0.862306		15.5508	0.876024		15.5509	0.866387		15.5509	0.877879		15.5508	0.869738		15.5508	0.875806		15.5509	0.867759		15.5509	0.875387		15.5508	0.866719		15.5508	0.8698		15.5508	0.867228		15.5508	0.866758		15.5509	0.865283
15.6008	0.878055		15.6009	0.86481		15.6009	0.880319		15.6008	0.85809		15.6008	0.876915		15.6009	0.866128		15.6009	0.876524		15.6008	0.865367		15.6008	0.87858		15.6009	0.865169		15.6009	0.876561		15.6008	0.86914		15.6008	0.8685		15.6008	0.867284		15.6008	0.865201		15.6009	0.864728
15.6508	0.878538		15.6509	0.864062		15.6509	0.881587		15.6508	0.863205		15.6508	0.87625		15.6509	0.865946		15.6509	0.875573		15.6508	0.865727		15.6508	0.8785		15.6509	0.866777		15.6509	0.876076		15.6509	0.867648		15.6508	0.86868		15.6508	0.868789		15.6508	0.868528		15.6509	0.864363
15.7008	0.879283		15.7009	0.863433		15.7009	0.881014		15.7008	0.858568		15.7008	0.880171		15.7009	0.867898		15.7009	0.878416		15.7008	0.86527		15.7008	0.877662		15.7009	0.86685		15.7009	0.872602		15.7009	0.868468		15.7008	0.868386		15.7008	0.866862		15.7008	0.867777		15.7009	0.866001
15.7508	0.880663		15.7509	0.861924		15.7509	0.882796		15.7508	0.859821		15.7508	0.876563		15.7509	0.867988		15.7509	0.876086		15.7508	0.867101		15.7508	0.877993		15.7509	0.865785		15.7509	0.875305		15.7509	0.867082		15.7509	0.86892		15.7508	0.870044		15.7508	0.867684		15.7509	0.866834
15.8008	0.878707		15.8009	0.863971		15.8009	0.879555		15.8008	0.861469		15.8008	0.877607		15.8009	0.868935		15.8009	0.876955		15.8009	0.865367		15.8008	0.878792		15.8009	0.867405		15.8009	0.874692		15.8009	0.867841		15.8009	0.867238		15.8008	0.868404		15.8008	0.866777		15.8009	0.863166
15.8508	0.881096		15.8509	0.861392		15.8509	0.880169		15.8508	0.859932		15.8508	0.879734		15.8509	0.867361		15.8509	0.878351		15.8509	0.866612		15.8508	0.877728		15.8509	0.864681		15.8509	0.876142		15.8509	0.866136		15.8509	0.867284		15.8508	0.868596		15.8508	0.866753		15.8509	0.864285
15.9008	0.879271		15.9009	0.861192		15.9009	0.88024		15.9008	0.863257		15.9008	0.878311		15.9009	0.866634		15.9009	0.87854		15.9009	0.865032		15.9009	0.879708		15.9009	0.867001		15.9009	0.872566		15.9009	0.867032		15.9009	0.869765		15.9008	0.872797		15.9008	0.865342		15.9009	0.861622
15.9508	0.880582		15.9509	0.865463		15.9509	0.881965		15.9509	0.86486		15.9508	0.877687		15.9509	0.866952		15.9509	0.878524		15.9509	0.865401		15.9509	0.878804		15.9509	0.868513		15.9509	0.873143		15.9509	0.870941		15.9509	0.86652		15.9508	0.870769		15.9508	0.865288		15.9509	0.867439
16.0008	0.880666		16.0009	0.862109		16.0009	0.878156		16.0009	0.862019		16.0008	0.877829		16.0009	0.865813		16.0009	0.8788		16.0009	0.864692		16.0009	0.876477		16.0009	0.865844		16.0009	0.877092		16.0009	0.868642		16.0009	0.869007		16.0008	0.868723		16.0008	0.869327		16.0009	0.864233
16.0508	0.880144		16.0509	0.863295		16.0509	0.879662		16.0509	0.863886		16.0509	0.876257		16.0509	0.865808		16.0509	0.874665		16.0509	0.866903		16.0509	0.879272		16.0509	0.869415		16.0509	0.875429		16.0509	0.867412		16.0509	0.870037		16.0508	0.869838		16.0508	0.864396		16.0509	0.862817
16.1008	0.879638		16.1009	0.864731		16.1009	0.882991		16.1009	0.86391		16.1009	0.877313		16.1009	0.866091		16.1009	0.876305		16.1009	0.866554		16.1009	0.877321		16.1009	0.866766		16.1009	0.876199		16.1009	0.869089		16.1009	0.869157		16.1008	0.867823		16.1008	0.867308		16.1009	0.866925
16.1508	0.879374		16.1509	0.864877		16.1509	0.883394		16.1509	0.860541		16.1509	0.875565		16.1509	0.865561		16.1509	0.87794		16.1509	0.864854		16.1509	0.877404		16.1509	0.867518		16.1509	0.874397		16.1509	0.869054		16.1509	0.864664		16.1508	0.867643		16.1508	0.86417		16.1509	0.864016
16.2009	0.880172		16.2009	0.862731		16.2009	0.8784		16.2009	0.860511		16.2009	0.879526		16.2009	0.867072		16.2009	0.87759		16.2009	0.865974		16.2009	0.876571		16.2009	0.86435		16.2009	0.875542		16.2009	0.867678		16.2009	0.868829		16.2008	0.867262		16.2008	0.864463		16.2009	0.863632
16.2509	0.879871		16.2509	0.859129		16.2509	0.879915		16.2509	0.861282		16.2509	0.877573		16.2509	0.864594		16.2509	0.878196		16.2509	0.865551		16.2509	0.876479		16.2509	0.866884		16.2509	0.876137		16.2509	0.866428		16.2509	0.865685		16.2508	0.867773		16.2508	0.865959		16.2509	0.865751
16.3009	0.880858		16.3009	0.863379		16.3009	0.883605		16.3009	0.85971		16.3009	0.877582		16.3009	0.866293		16.3009	0.877962		16.3009	0.867449		16.3009	0.880323		16.3009	0.865233		16.3009	0.876924		16.3009	0.867656		16.3009	0.866462		16.3008	0.869263		16.3008	0.865868		16.3009	0.863296
16.3509	0.880399		16.3509	0.864221		16.3509	0.88157		16.3509	0.860109		16.3509	0.877824		16.3509	0.864635		16.3509	0.877217		16.3509	0.866809		16.3509	0.877195		16.3509	0.865193		16.3509	0.874856		16.3509	0.867196		16.3509	0.867882		16.3508	0.86845		16.3508	0.865729		16.3509	0.863828
16.4009	0.878889		16.4009	0.865322		16.4009	0.878079		16.4009	0.861057		16.4009	0.879427		16.4009	0.867415		16.4009	0.876571		16.4009	0.861256		16.4009	0.877119		16.4009	0.867537		16.4009	0.873683		16.4009	0.868809		16.4009	0.870001		16.4008	0.869131		16.4008	0.865564		16.4009	0.863835
16.4509	0.878304		16.4509	0.861632		16.4509	0.880865		16.4509	0.864295		16.4509	0.878035		16.4509	0.866568		16.4509	0.877577		16.4509	0.864005		16.4509	0.876466		16.4509	0.866615		16.4509	0.875927		16.4509	0.866095		16.4509	0.867249		16.4508	0.869581		16.4508	0.86466		16.4509	0.864185
16.5009	0.880316		16.5009	0.862117		16.5009	0.879135		16.5009	0.862008		16.5009	0.879376		16.5009	0.866262		16.5009	0.877117		16.5009	0.865898		16.5009	0.879128		16.5009	0.867537		16.5009	0.874724		16.5009	0.865596		16.5009	0.869465		16.5009	0.868296		16.5008	0.866735		16.5009	0.86728
16.5509	0.879346		16.5509	0.862969		16.5509	0.881779		16.5509	0.863449		16.5509	0.875799		16.5509	0.865087		16.5509	0.875478		16.5509	0.86418		16.5509	0.876582		16.5509	0.86652		16.5509	0.873402		16.5509	0.866634		16.5509	0.867813		16.5509	0.868435		16.5508	0.863411		16.5509	0.864111
16.6009	0.879016		16.6009	0.863254		16.6009	0.881107		16.6009	0.860029		16.6009	0.881543		16.6009	0.863234		16.6009	0.879269		16.6009	0.867398		16.6009	0.876367		16.6009	0.865512		16.6009	0.87631		16.6009	0.866174		16.6009	0.869851		16.6009	0.867173		16.6009	0.864178		16.6009	0.861305
16.6509	0.879182		16.6509	0.861706		16.6509	0.878289		16.6509	0.861554		16.6509	0.87642		16.6509	0.863921		16.6509	0.877025		16.6509	0.865746		16.6509	0.875274		16.651	0.867394		16.6509	0.875645		16.6509	0.868075		16.6509	0.869014		16.6509	0.869928		16.6509	0.865565		16.6509	0.865654
16.7009	0.878104		16.7009	0.861782		16.7009	0.881465		16.7009	0.85936		16.7009	0.879409		16.7009	0.864806		16.7009	0.879166		16.7009	0.864025		16.7009	0.878833		16.701	0.865713		16.7009	0.876009		16.7009	0.868882		16.7009	0.867257		16.7009	0.869882		16.7009	0.865497		16.7009	0.865825
16.7509	0.87772		16.7509	0.863731		16.7509	0.8806		16.7509	0.86096		16.7509	0.877614		16.7509	0.866609		16.7509	0.877238		16.7509	0.865523		16.7509	0.876482		16.751	0.866617		16.751	0.875373		16.7509	0.86806		16.7509	0.86711		16.7509	0.870855		16.7509	0.866319		16.7509	0.86269
16.8009	0.879338		16.8009	0.863194		16.8009	0.880871		16.8009	0.864808		16.8009	0.877266		16.801	0.867282		16.8009	0.875253		16.8009	0.865229		16.8009	0.87873		16.801	0.867852		16.801	0.873355		16.8009	0.865981		16.8009	0.866801		16.8009	0.868327		16.8009	0.864535		16.8009	0.863857
16.8509	0.878455		16.8509	0.860935		16.8509	0.880166		16.8509	0.861095		16.8509	0.878029		16.851	0.866601		16.8509	0.876069		16.8509	0.862798		16.8509	0.879613		16.851	0.869327		16.851	0.875241		16.8509	0.866957		16.8509	0.865082		16.8509	0.868541		16.8509	0.866408		16.8509	0.864587
16.9009	0.880735		16.9009	0.863413		16.9009	0.877487		16.9009	0.858834		16.9009	0.876402		16.901	0.867319		16.901	0.875758		16.9009	0.866571		16.9009	0.874681		16.901	0.865849		16.901	0.875612		16.9009	0.865825		16.9009	0.868468		16.9009	0.869979		16.9009	0.865595		16.9009	0.86435
16.9509	0.879081		16.951	0.862899		16.9509	0.883364		16.9509	0.85759		16.9509	0.874442		16.951	0.866358		16.951	0.876493		16.9509	0.865753		16.9509	0.877748		16.951	0.868461		16.951	0.87494		16.9509	0.865072		16.9509	0.868147		16.9509	0.870657		16.9509	0.870308		16.9509	0.866793
17.0009	0.87857		17.001	0.863451		17.0009	0.87898		17.0009	0.861581		17.0009	0.876198		17.001	0.863955		17.001	0.877329		17.0009	0.865666		17.0009	0.878198		17.001	0.869253		17.001	0.872873		17.0009	0.869363		17.0009	0.865725		17.0009	0.872009		17.0009	0.867533		17.0009	0.865975
17.0509	0.879789		17.051	0.863768		17.051	0.881822		17.0509	0.862907		17.0509	0.876142		17.051	0.867237		17.051	0.875653		17.0509	0.864848		17.0509	0.876838		17.051	0.866285		17.051	0.87212		17.0509	0.868174		17.0509	0.865836		17.0509	0.869636		17.0509	0.86533		17.0509	0.860841
17.1009	0.878192		17.101	0.863478		17.101	0.88049		17.1009	0.856403		17.1009	0.880007		17.101	0.860449		17.101	0.877707		17.1009	0.866906		17.1009	0.875644		17.101	0.86722		17.101	0.874356		17.1009	0.866638		17.1009	0.866972		17.1009	0.870752		17.1009	0.86587		17.1009	0.866689
17.1509	0.87924		17.151	0.863216		17.151	0.881124		17.1509	0.862853		17.1509	0.876998		17.151	0.862728		17.151	0.874524		17.1509	0.862833		17.1509	0.873931		17.151	0.867338		17.151	0.872473		17.1509	0.868013		17.1509	0.868423		17.1509	0.870158		17.1509	0.867947		17.1509	0.864716
17.2009	0.877523		17.201	0.861728		17.201	0.881586		17.2009	0.857105		17.2009	0.878364		17.201	0.864919		17.201	0.8764		17.2009	0.864448		17.2009	0.878246		17.201	0.863804		17.201	0.876369		17.2009	0.864405		17.2009	0.869602		17.2009	0.868186		17.2009	0.863841		17.2009	0.865388
17.2509	0.881492		17.251	0.86229		17.251	0.882104		17.2509	0.859483		17.2509	0.878898		17.251	0.865257		17.251	0.875571		17.2509	0.866438		17.2509	0.87759		17.251	0.866459		17.251	0.875233		17.2509	0.86632		17.2509	0.865155		17.2509	0.868557		17.2509	0.862484		17.251	0.86654
17.3009	0.881899		17.301	0.862204		17.301	0.880054		17.3009	0.86135		17.3009	0.877162		17.301	0.864475		17.301	0.87605		17.3009	0.866073		17.3009	0.878064		17.301	0.864431		17.301	0.875063		17.3009	0.86919		17.3009	0.867179		17.3009	0.868452		17.3009	0.865359		17.301	0.86432
17.3509	0.8811		17.351	0.862596		17.351	0.881239		17.3509	0.859027		17.3509	0.876124		17.351	0.863783		17.351	0.876955		17.3509	0.86495		17.3509	0.878208		17.351	0.863151		17.351	0.875439		17.3509	0.867343		17.3509	0.867518		17.3509	0.868469		17.3509	0.864327		17.351	0.861485
17.4009	0.877344		17.401	0.862681		17.401	0.879139		17.4009	0.858312		17.4009	0.876528		17.401	0.865457		17.401	0.879282		17.4009	0.866448		17.4009	0.874626		17.401	0.86492		17.401	0.875738		17.4009	0.866423		17.4009	0.868187		17.4009	0.868782		17.4009	0.867779		17.401	0.866264
17.4509	0.878683		17.451	0.861328		17.451	0.879841		17.4509	0.8613		17.4509	0.881075		17.451	0.867844		17.451	0.878597		17.4509	0.864943		17.4509	0.87774		17.451	0.865984		17.451	0.875395		17.451	0.868378		17.4509	0.868935		17.4509	0.871301		17.4509	0.863886		17.451	0.864013
17.5009	0.877118		17.501	0.86201		17.501	0.880801		17.5009	0.858471		17.5009	0.876588		17.501	0.864883		17.501	0.87627		17.5009	0.865838		17.5009	0.875597		17.501	0.866217		17.501	0.875293		17.501	0.866823		17.5009	0.867585		17.5009	0.867276		17.5009	0.864231		17.501	0.862016
17.5509	0.877011		17.551	0.860204		17.551	0.882318		17.5509	0.860327		17.5509	0.877627		17.551	0.864351		17.551	0.877721		17.5509	0.866346		17.5509	0.87737		17.551	0.868587		17.551	0.874917		17.551	0.868145		17.5509	0.866754		17.5509	0.868967		17.5509	0.867549		17.551	0.862368
17.6009	0.880324		17.601	0.861136		17.601	0.882028		17.6009	0.859176		17.6009	0.875151		17.601	0.864763		17.601	0.875643		17.601	0.862732		17.6009	0.875815		17.601	0.864658		17.601	0.875326		17.601	0.866322		17.601	0.868716		17.6009	0.869278		17.6009	0.86514		17.601	0.862156
17.6509	0.8788		17.651	0.860572		17.651	0.880292		17.6509	0.858728		17.6509	0.876973		17.651	0.867066		17.651	0.875165		17.651	0.867314		17.6509	0.875339		17.651	0.863892		17.651	0.875277		17.651	0.863301		17.651	0.867093		17.6509	0.871031		17.6509	0.868214		17.651	0.863118
17.7009	0.878792		17.701	0.861251		17.701	0.881876		17.7009	0.856638		17.7009	0.878766		17.701	0.862232		17.701	0.87536		17.701	0.86685		17.7009	0.875972		17.701	0.865144		17.701	0.875942		17.701	0.86617		17.701	0.867194		17.7009	0.868325		17.7009	0.864641		17.701	0.862597
17.7509	0.879549		17.751	0.863972		17.751	0.882981		17.7509	0.86213		17.7509	0.876994		17.751	0.865022		17.751	0.875351		17.751	0.864783		17.751	0.879253		17.751	0.865831		17.751	0.876228		17.751	0.867144		17.751	0.865267		17.7509	0.870754		17.7509	0.867862		17.751	0.861125
17.8009	0.878602		17.801	0.860523		17.801	0.881313		17.801	0.861008		17.8009	0.877268		17.801	0.863745		17.801	0.873678		17.801	0.865578		17.801	0.87775		17.801	0.864412		17.801	0.875953		17.801	0.86411		17.801	0.868847		17.8009	0.870601		17.8009	0.865505		17.801	0.862679
17.8509	0.879979		17.851	0.860695		17.851	0.881739		17.851	0.86079		17.8509	0.881598		17.851	0.861895		17.851	0.876076		17.851	0.865285		17.851	0.875568		17.851	0.865058		17.851	0.875846		17.851	0.864719		17.851	0.867536		17.8509	0.87112		17.8509	0.862702		17.851	0.863294
17.9009	0.8784		17.901	0.859872		17.901	0.878982		17.901	0.860534		17.901	0.876654		17.901	0.865265		17.901	0.874885		17.901	0.865049		17.901	0.876503		17.901	0.864745		17.901	0.876517		17.901	0.865896		17.901	0.863768		17.9009	0.869665		17.9009	0.863763		17.901	0.865722
17.9509	0.879715		17.951	0.86195		17.951	0.880194		17.951	0.861548		17.951	0.876636		17.951	0.866821		17.951	0.877117		17.951	0.865289		17.951	0.876875		17.951	0.86348		17.951	0.876445		17.951	0.867617		17.951	0.867481		17.9509	0.870229		17.9509	0.866055		17.951	0.863305
18.0009	0.879612		18.001	0.86257		18.001	0.882198		18.001	0.86116		18.001	0.877401		18.001	0.865944		18.001	0.87617		18.001	0.864322		18.001	0.877941		18.001	0.866589		18.001	0.876028		18.001	0.86509		18.001	0.867508		18.0009	0.86957		18.0009	0.866375		18.001	0.864425
18.051	0.880195		18.051	0.86293		18.051	0.880943		18.051	0.862842		18.051	0.877725		18.051	0.863703		18.051	0.875856		18.051	0.865712		18.051	0.876785		18.051	0.86561		18.051	0.878051		18.051	0.866503		18.051	0.868149		18.0509	0.867148		18.0509	0.864145		18.051	0.863166
18.101	0.878496		18.101	0.860939		18.101	0.88192		18.101	0.856801		18.101	0.87318		18.101	0.863282		18.101	0.877807		18.101	0.864072		18.101	0.877745		18.101	0.865638		18.101	0.875838		18.101	0.864894		18.101	0.868051		18.1009	0.869401		18.1009	0.863409		18.101	0.861749
18.151	0.878689		18.151	0.863053		18.151	0.881221		18.151	0.859438		18.151	0.877268		18.151	0.863258		18.151	0.875913		18.151	0.867363		18.151	0.875472		18.151	0.864212		18.151	0.877367		18.151	0.864677		18.151	0.864752		18.1509	0.866126		18.1509	0.863006		18.151	0.864755
18.201	0.879674		18.201	0.861167		18.201	0.882125		18.201	0.860108		18.201	0.873164		18.201	0.860015		18.201	0.87591		18.201	0.862988		18.201	0.876301		18.201	0.86676		18.201	0.879409		18.201	0.867935		18.201	0.868065		18.2009	0.86857		18.2009	0.863511		18.201	0.862115
18.251	0.88032		18.251	0.861968		18.251	0.880625		18.251	0.862159		18.251	0.877444		18.251	0.865868		18.251	0.877274		18.251	0.866614		18.251	0.87558		18.251	0.865427		18.251	0.877894		18.251	0.868047		18.251	0.864901		18.2509	0.868393		18.2509	0.866628		18.251	0.866664
18.301	0.876696		18.301	0.864688		18.301	0.880448		18.301	0.858855		18.301	0.878649		18.301	0.86407		18.301	0.875489		18.301	0.865276		18.301	0.877355		18.301	0.862627		18.301	0.880288		18.301	0.869354		18.301	0.865374		18.301	0.870226		18.3009	0.864063		18.301	0.865707
18.351	0.879482		18.351	0.860953		18.351	0.880545		18.351	0.860248		18.351	0.876305		18.351	0.865343		18.351	0.8756		18.351	0.863348		18.351	0.874233		18.351	0.864206		18.351	0.874909		18.351	0.867151		18.351	0.866742		18.351	0.868644		18.3509	0.865177		18.351	0.862402
18.401	0.880223		18.401	0.859335		18.401	0.880952		18.401	0.860637		18.401	0.875982		18.401	0.867144		18.401	0.876418		18.401	0.863459		18.401	0.875106		18.401	0.865012		18.401	0.876725		18.401	0.868592		18.401	0.865803		18.401	0.868176		18.401	0.863665		18.401	0.862599
18.451	0.876362		18.451	0.863021		18.451	0.880774		18.451	0.859743		18.451	0.878854		18.451	0.864346		18.451	0.877455		18.451	0.862923		18.451	0.874935		18.451	0.86544		18.451	0.875557		18.451	0.865956		18.451	0.866859		18.451	0.869635		18.451	0.864076		18.451	0.866057
18.501	0.880445		18.501	0.864654		18.501	0.884268		18.501	0.860994		18.501	0.878878		18.501	0.864086		18.501	0.876144		18.501	0.865372		18.501	0.873247		18.5011	0.866921		18.501	0.876354		18.501	0.862996		18.501	0.865534		18.501	0.869086		18.501	0.862006		18.501	0.862126
18.551	0.87772		18.551	0.859031		18.551	0.879619		18.551	0.858198		18.551	0.877836		18.551	0.86661		18.551	0.876409		18.551	0.863234		18.551	0.876617		18.5511	0.863715		18.551	0.875725		18.551	0.86527		18.551	0.866397		18.551	0.868674		18.551	0.86509		18.551	0.863512
18.601	0.879534		18.601	0.861561		18.601	0.878488		18.601	0.858168		18.601	0.877544		18.6011	0.864812		18.601	0.874919		18.601	0.861984		18.601	0.874468		18.6011	0.864442		18.6011	0.877261		18.601	0.865781		18.601	0.868894		18.601	0.869566		18.601	0.863366		18.601	0.861538
18.651	0.87694		18.651	0.859165		18.651	0.881429		18.651	0.860028		18.651	0.877118		18.6511	0.866009		18.651	0.875693		18.651	0.862206		18.651	0.876231		18.6511	0.866377		18.6511	0.877404		18.651	0.868894		18.651	0.866092		18.651	0.866457		18.651	0.863564		18.651	0.864549
18.701	0.878196		18.701	0.863179		18.701	0.880426		18.701	0.861165		18.701	0.877864		18.7011	0.863557		18.7011	0.874992		18.701	0.863599		18.701	0.873668		18.7011	0.863669		18.7011	0.877836		18.701	0.864476		18.701	0.865778		18.701	0.87083		18.701	0.864239		18.701	0.860316
18.751	0.88034		18.751	0.859914		18.751	0.878756		18.751	0.860769		18.751	0.877903		18.7511	0.865375		18.7511	0.877262		18.751	0.866533		18.751	0.875455		18.7511	0.863778		18.7511	0.877559		18.751	0.86725		18.751	0.865247		18.751	0.869245		18.751	0.866165		18.751	0.864153
18.801	0.876082		18.8011	0.863308		18.801	0.880904		18.801	0.858081		18.801	0.875961		18.8011	0.865069		18.8011	0.87548		18.801	0.863762		18.801	0.877046		18.8011	0.861657		18.8011	0.877565		18.801	0.868671		18.801	0.865351		18.801	0.867458		18.801	0.863056		18.801	0.864829
18.851	0.88015		18.8511	0.862869		18.851	0.880733		18.851	0.860805		18.851	0.877931		18.8511	0.862915		18.8511	0.874675		18.851	0.864975		18.851	0.874077		18.8511	0.864547		18.8511	0.877344		18.851	0.86499		18.851	0.870149		18.851	0.871316		18.851	0.865368		18.851	0.863992
18.901	0.879295		18.9011	0.859107		18.9011	0.880336		18.901	0.858703		18.901	0.878396		18.9011	0.864787		18.9011	0.876535		18.901	0.863216		18.901	0.877177		18.9011	0.86288		18.9011	0.877648		18.901	0.865769		18.901	0.864664		18.901	0.870678		18.901	0.865515		18.901	0.86316
18.951	0.877919		18.9511	0.861263		18.9511	0.879774		18.951	0.859024		18.951	0.876726		18.9511	0.863684		18.9511	0.873449		18.951	0.865672		18.951	0.876669		18.9511	0.865393		18.9511	0.877575		18.951	0.865069		18.951	0.86563		18.951	0.87204		18.951	0.865035		18.951	0.860839
19.001	0.879301		19.0011	0.86171		19.0011	0.880968		19.001	0.85975		19.001	0.876522		19.0011	0.862945		19.0011	0.875498		19.001	0.866288		19.001	0.87289		19.0011	0.864316		19.0011	0.880133		19.001	0.864008		19.001	0.867503		19.001	0.871837		19.001	0.862123		19.001	0.86261
19.051	0.876699		19.0511	0.860224		19.0511	0.880969		19.051	0.858094		19.051	0.875013		19.0511	0.86366		19.0511	0.876993		19.051	0.867252		19.051	0.878497		19.0511	0.862659		19.0511	0.877007		19.051	0.863156		19.051	0.868317		19.051	0.866945		19.051	0.865088		19.051	0.864621
19.101	0.877808		19.1011	0.862908		19.1011	0.87716		19.101	0.859468		19.101	0.877867		19.1011	0.863415		19.1011	0.875439		19.101	0.863677		19.101	0.874799		19.1011	0.864038		19.1011	0.87601		19.101	0.865884		19.101	0.866589		19.101	0.87082		19.101	0.861896		19.1011	0.864371
19.151	0.878277		19.1511	0.860307		19.1511	0.878502		19.151	0.858741		19.151	0.87891		19.1511	0.863442		19.1511	0.874665		19.151	0.861966		19.151	0.873077		19.1511	0.863383		19.1511	0.877321		19.151	0.867763		19.151	0.86235		19.151	0.870801		19.151	0.863432		19.1511	0.861445
19.201	0.878975		19.2011	0.860302		19.2011	0.88035		19.201	0.859242		19.201	0.876613		19.2011	0.862963		19.2011	0.874749		19.201	0.863393		19.201	0.875876		19.2011	0.864504		19.2011	0.875661		19.201	0.866198		19.201	0.865493		19.201	0.86912		19.201	0.867203		19.2011	0.864709
19.251	0.878093		19.2511	0.863296		19.2511	0.880671		19.251	0.862586		19.251	0.876193		19.2511	0.861516		19.2511	0.876008		19.251	0.864628		19.251	0.875981		19.2511	0.864261		19.2511	0.876153		19.251	0.866429		19.251	0.863777		19.251	0.869708		19.251	0.867737		19.2511	0.861138
19.301	0.877759		19.3011	0.860911		19.3011	0.879585		19.301	0.859862		19.301	0.874616		19.3011	0.862854		19.3011	0.874657		19.301	0.860717		19.301	0.876664		19.3011	0.86692		19.3011	0.877876		19.3011	0.864093		19.301	0.864368		19.301	0.868307		19.301	0.863506		19.3011	0.861042
19.351	0.878555		19.3511	0.862956		19.3511	0.876472		19.351	0.861953		19.351	0.87393		19.3511	0.865503		19.3511	0.875353		19.351	0.86351		19.351	0.874708		19.3511	0.863644		19.3511	0.876446		19.3511	0.869169		19.351	0.865735		19.351	0.869118		19.351	0.862993		19.3511	0.862751
19.401	0.878		19.4011	0.860239		19.4011	0.875466		19.401	0.860321		19.401	0.875964		19.4011	0.864912		19.4011	0.877185		19.401	0.864994		19.401	0.875526		19.4011	0.864237		19.4011	0.875349		19.4011	0.866929		19.401	0.868091		19.401	0.869172		19.401	0.864303		19.4011	0.862116
19.451	0.877236		19.4511	0.858236		19.4511	0.877783		19.451	0.857835		19.451	0.87737		19.4511	0.864887		19.4511	0.878145		19.4511	0.863015		19.451	0.877163		19.4511	0.865209		19.4511	0.876771		19.4511	0.868321		19.4511	0.864902		19.451	0.869576		19.451	0.863696		19.4511	0.866924
19.501	0.876376		19.5011	0.860702		19.5011	0.880063		19.501	0.858383		19.501	0.87472		19.5011	0.862597		19.5011	0.876641		19.5011	0.863016		19.501	0.873255		19.5011	0.865292		19.5011	0.876649		19.5011	0.865228		19.5011	0.866927		19.501	0.87043		19.501	0.861948		19.5011	0.862225
19.551	0.880349		19.5511	0.860492		19.5511	0.883048		19.551	0.858105		19.551	0.875602		19.5511	0.863032		19.5511	0.875672		19.5511	0.863535		19.5511	0.876334		19.5511	0.863646		19.5511	0.877495		19.5511	0.865784		19.5511	0.86468		19.551	0.870134		19.551	0.861526		19.5511	0.863263
19.601	0.87736		19.6011	0.859975		19.6011	0.87856		19.6011	0.858688		19.601	0.875696		19.6011	0.864669		19.6011	0.87386		19.6011	0.863898		19.6011	0.875457		19.6011	0.864946		19.6011	0.875931		19.6011	0.864962		19.6011	0.865913		19.601	0.871049		19.601	0.864675		19.6011	0.8605
19.651	0.877433		19.6511	0.863425		19.6511	0.878626		19.6511	0.857926		19.651	0.876249		19.6511	0.863267		19.6511	0.875878		19.6511	0.864952		19.6511	0.876633		19.6511	0.862097		19.6511	0.877517		19.6511	0.867639		19.6511	0.865325		19.651	0.870526		19.651	0.863873		19.6511	0.860253
19.701	0.877801		19.7011	0.86103		19.7011	0.878682		19.7011	0.85662		19.7011	0.877382		19.7011	0.863322		19.7011	0.872739		19.7011	0.867178		19.7011	0.875658		19.7011	0.86186		19.7011	0.877644		19.7011	0.866269		19.7011	0.86577		19.701	0.868899		19.701	0.861542		19.7011	0.862006
19.751	0.877809		19.7511	0.861613		19.7511	0.87934		19.7511	0.858326		19.7511	0.876117		19.7511	0.862893		19.7511	0.874086		19.7511	0.861703		19.7511	0.875094		19.7511	0.866601		19.7511	0.877807		19.7511	0.865262		19.7511	0.865284		19.751	0.87085		19.751	0.865055		19.7511	0.85987
19.801	0.878785		19.8011	0.85948		19.8011	0.880243		19.8011	0.861776		19.8011	0.876865		19.8011	0.86308		19.8011	0.873033		19.8011	0.865974		19.8011	0.87403		19.8011	0.860997		19.8011	0.877979		19.8011	0.865558		19.8011	0.867839		19.801	0.868389		19.801	0.862302		19.8011	0.863532
19.8511	0.880925		19.8511	0.860351		19.8511	0.879407		19.8511	0.856959		19.8511	0.875332		19.8511	0.861301		19.8511	0.876007		19.8511	0.865854		19.8511	0.875798		19.8511	0.863767		19.8511	0.87891		19.8511	0.865509		19.8511	0.865862		19.851	0.869217		19.851	0.863323		19.8511	0.862821
19.9011	0.875745		19.9011	0.865351		19.9011	0.879335		19.9011	0.858994		19.9011	0.872675		19.9011	0.865332		19.9011	0.873452		19.9011	0.863532		19.9011	0.874191		19.9011	0.863737		19.9011	0.875579		19.9011	0.866365		19.9011	0.868246		19.901	0.870116		19.901	0.861231		19.9011	0.863352
19.9511	0.877427		19.9511	0.861053		19.9511	0.879405		19.9511	0.85664		19.9511	0.875201		19.9511	0.863286		19.9511	0.873726		19.9511	0.864227		19.9511	0.875363		19.9511	0.866058		19.9511	0.877955		19.9511	0.865376		19.9511	0.864535		19.951	0.869161		19.951	0.864683		19.9511	0.864407
20.0011	0.876761		20.0011	0.864928		20.0011	0.880678		20.0011	0.859505		20.0011	0.876643		20.0011	0.862963		20.0011	0.876456		20.0011	0.860971		20.0011	0.874533		20.0011	0.862764		20.0011	0.877049		20.0011	0.865751		20.0011	0.863602		20.001	0.868676		20.001	0.862729		20.0011	0.864748
20.0511	0.878331		20.0511	0.862226		20.0511	0.878659		20.0511	0.856851		20.0511	0.877255		20.0511	0.862672		20.0511	0.876272		20.0511	0.863137		20.0511	0.874877		20.0511	0.864924		20.0511	0.877543		20.0511	0.864364		20.0511	0.867791		20.051	0.867917		20.051	0.861836		20.0511	0.861501
20.1011	0.876747		20.1011	0.860092		20.1011	0.880403		20.1011	0.859698		20.1011	0.876738		20.1011	0.865244		20.1011	0.877435		20.1011	0.86494		20.1011	0.875154		20.1011	0.862811		20.1011	0.878714		20.1011	0.868637		20.1011	0.868244		20.101	0.869172		20.101	0.862411		20.1011	0.86328
20.1511	0.87864		20.1511	0.862871		20.1511	0.878212		20.1511	0.857878		20.1511	0.875433		20.1511	0.862381		20.1511	0.874107		20.1511	0.863901		20.1511	0.87546		20.1511	0.869056		20.1511	0.876446		20.1511	0.861994		20.1511	0.866936		20.1511	0.868298		20.151	0.864142		20.1511	0.863817
20.2011	0.878717		20.2011	0.858958		20.2011	0.878817		20.2011	0.859843		20.2011	0.876786		20.2011	0.863593		20.2011	0.874388		20.2011	0.863973		20.2011	0.873326		20.2011	0.866912		20.2011	0.875329		20.2011	0.865682		20.2011	0.866439		20.2011	0.870397		20.201	0.863205		20.2011	0.862401
20.2511	0.877611		20.2511	0.860238		20.2511	0.882327		20.2511	0.859841		20.2511	0.877163		20.2511	0.864121		20.2511	0.874694		20.2511	0.863596		20.2511	0.87518		20.2511	0.862752		20.2511	0.87645		20.2511	0.868205		20.2511	0.864796		20.2511	0.870404		20.2511	0.863623		20.2511	0.860638
20.3011	0.878504		20.3011	0.859616		20.3011	0.881581		20.3011	0.859129		20.3011	0.874598		20.3011	0.863401		20.3011	0.874912		20.3011	0.863619		20.3011	0.877526		20.3012	0.866226		20.3011	0.876474		20.3011	0.863941		20.3011	0.86621		20.3011	0.868761		20.3011	0.86093		20.3011	0.860996
20.3511	0.876927		20.3511	0.860704		20.3511	0.877532		20.3511	0.857098		20.3511	0.87577		20.3511	0.864253		20.3511	0.875745		20.3511	0.863364		20.3511	0.87354		20.3512	0.867829		20.3511	0.876423		20.3511	0.866099		20.3511	0.863795		20.3511	0.868875		20.3511	0.864943		20.3511	0.863631
20.4011	0.879753		20.4011	0.860117		20.4011	0.882651		20.4011	0.858547		20.4011	0.874676		20.4011	0.863773		20.4011	0.878448		20.4011	0.864691		20.4011	0.876819		20.4012	0.865562		20.4012	0.878891		20.4011	0.864394		20.4011	0.862435		20.4011	0.867782		20.4011	0.865634		20.4011	0.863684
20.4511	0.877851		20.4511	0.863473		20.4511	0.878341		20.4511	0.859306		20.4511	0.878797		20.4512	0.861848		20.4511	0.875704		20.4511	0.864684		20.4511	0.875862		20.4512	0.864412		20.4512	0.87449		20.4511	0.865825		20.4511	0.862512		20.4511	0.866015		20.4511	0.864889		20.4511	0.864907
20.5011	0.879787		20.5011	0.861571		20.5011	0.87826		20.5011	0.858842		20.5011	0.873934		20.5012	0.864316		20.5012	0.875566		20.5011	0.864452		20.5011	0.873931		20.5012	0.867049		20.5012	0.876982		20.5011	0.864538		20.5011	0.867734		20.5011	0.868964		20.5011	0.861361		20.5011	0.862637
20.5511	0.877857		20.5511	0.860683		20.5511	0.879597		20.5511	0.859478		20.5511	0.87687		20.5512	0.863438		20.5512	0.872392		20.5511	0.862319		20.5511	0.876291		20.5512	0.863953		20.5512	0.879402		20.5511	0.862881		20.5511	0.867014		20.5511	0.86826		20.5511	0.86201		20.5511	0.86547
20.6011	0.879501		20.6012	0.859796		20.6011	0.879451		20.6011	0.860301		20.6011	0.874692		20.6012	0.863354		20.6012	0.872908		20.6011	0.862531		20.6011	0.87326		20.6012	0.865338		20.6012	0.874268		20.6011	0.865492		20.6011	0.867508		20.6011	0.868859		20.6011	0.862151		20.6011	0.862172
20.6511	0.878929		20.6512	0.860161		20.6511	0.879259		20.6511	0.85821		20.6511	0.875239		20.6512	0.862316		20.6512	0.874188		20.6511	0.863541		20.6511	0.874255		20.6512	0.86355		20.6512	0.875995		20.6511	0.86574		20.6511	0.866482		20.6511	0.867707		20.6511	0.861021		20.6511	0.862951
20.7011	0.877992		20.7012	0.85964		20.7012	0.878738		20.7011	0.860309		20.7011	0.876682		20.7012	0.863461		20.7012	0.875139		20.7011	0.865054		20.7011	0.877095		20.7012	0.863551		20.7012	0.876615		20.7011	0.861642		20.7011	0.865572		20.7011	0.869713		20.7011	0.864312		20.7011	0.860361
20.7511	0.877306		20.7512	0.860035		20.7512	0.876727		20.7511	0.857604		20.7511	0.876106		20.7512	0.862739		20.7512	0.872092		20.7511	0.861504		20.7511	0.871762		20.7512	0.867152		20.7512	0.877615		20.7511	0.865804		20.7511	0.864149		20.7511	0.86919		20.7511	0.859737		20.7511	0.861557
20.8011	0.879888		20.8012	0.86133		20.8012	0.877458		20.8011	0.857221		20.8011	0.875213		20.8012	0.86384		20.8012	0.875246		20.8011	0.861719		20.8011	0.873364		20.8012	0.864894		20.8012	0.877639		20.8011	0.865878		20.8011	0.86476		20.8011	0.867468		20.8011	0.863561		20.8011	0.862103
20.8511	0.877705		20.8512	0.85819		20.8512	0.878164		20.8511	0.857762		20.8511	0.874342		20.8512	0.860896		20.8512	0.876371		20.8511	0.865157		20.8511	0.875897		20.8512	0.863896		20.8512	0.876747		20.8511	0.863859		20.8511	0.864034		20.8511	0.868153		20.8511	0.863316		20.8511	0.859196
20.9011	0.87966		20.9012	0.858717		20.9012	0.874912		20.9011	0.85959		20.9011	0.874937		20.9012	0.86042		20.9012	0.875334		20.9011	0.862146		20.9011	0.875506		20.9012	0.863813		20.9012	0.875		20.9011	0.866341		20.9011	0.866191		20.9011	0.870716		20.9011	0.863462		20.9012	0.863293
20.9511	0.875594		20.9512	0.860993		20.9512	0.878829		20.9511	0.859958		20.9511	0.875128		20.9512	0.863622		20.9512	0.872629		20.9511	0.859905		20.9511	0.873418		20.9512	0.86656		20.9512	0.876825		20.9511	0.864786		20.9511	0.864855		20.9511	0.867612		20.9511	0.862931		20.9512	0.862217
21.0011	0.878573		21.0012	0.861145		21.0012	0.879389		21.0011	0.858015		21.0011	0.877367		21.0012	0.861284		21.0012	0.874953		21.0011	0.864166		21.0011	0.874278		21.0012	0.861699		21.0012	0.875652		21.0012	0.86356		21.0011	0.865047		21.0011	0.868802		21.0011	0.862637		21.0012	0.862346
21.0511	0.887201		21.0512	0.870393		21.0512	0.888452		21.0511	0.86581		21.0511	0.88287		21.0512	0.871259		21.0512	0.883637		21.0511	0.872613		21.0511	0.883822		21.0512	0.870542		21.0512	0.882492		21.0511	0.8733		21.0511	0.875246		21.0511	0.875229		21.0511	0.870154		21.0512	0.870629
21.1011	0.898158		21.1012	0.876167		21.1012	0.900356		21.1011	0.878439		21.1011	0.895199		21.1012	0.883004		21.1012	0.892353		21.1011	0.884516		21.1011	0.896116		21.1012	0.884019		21.1012	0.896998		21.1011	0.886243		21.1011	0.886815		21.1011	0.887457		21.1011	0.882008		21.1012	0.88281
21.1511	0.90488		21.1512	0.886814		21.1512	0.903093		21.1511	0.885222		21.1511	0.897943		21.1512	0.8893		21.1512	0.903013		21.1511	0.888824		21.1511	0.899553		21.1512	0.889385		21.1512	0.902025		21.1512	0.892521		21.1511	0.893869		21.1511	0.895894		21.1511	0.887946		21.1512	0.887626
21.2011	0.90546		21.2012	0.889053		21.2012	0.90684		21.2011	0.887453		21.2011	0.908464		21.2012	0.890256		21.2012	0.90616		21.2011	0.890606		21.2011	0.903909		21.2012	0.895169		21.2012	0.908745		21.2012	0.896083		21.2011	0.895266		21.2011	0.901903		21.2011	0.892463		21.2012	0.890654
21.2511	0.911454		21.2512	0.894538		21.2512	0.90898		21.2511	0.89156		21.2511	0.909785		21.2512	0.896781		21.2512	0.911673		21.2511	0.896256		21.2511	0.909809		21.2512	0.897226		21.2512	0.909858		21.2512	0.900207		21.2512	0.899665		21.2511	0.906152		21.2511	0.895752		21.2512	0.895044
21.3011	0.911737		21.3012	0.89778		21.3012	0.915897		21.3011	0.896039		21.3011	0.913265		21.3012	0.902006		21.3012	0.910334		21.3012	0.901934		21.3011	0.912541		21.3012	0.90029		21.3012	0.916922		21.3012	0.89973		21.3012	0.902501		21.3011	0.90129		21.3011	0.902247		21.3012	0.897646
21.3511	0.913006		21.3512	0.899747		21.3512	0.915258		21.3511	0.892704		21.3511	0.913077		21.3512	0.902065		21.3512	0.912508		21.3512	0.901965		21.3511	0.912487		21.3512	0.901639		21.3512	0.915957		21.3512	0.901266		21.3512	0.904541		21.3511	0.905953		21.3511	0.903216		21.3512	0.900402
21.4011	0.915481		21.4012	0.899343		21.4012	0.917532		21.4011	0.899269		21.4011	0.916113		21.4012	0.900794		21.4012	0.913942		21.4012	0.903816		21.4012	0.917144		21.4012	0.904583		21.4012	0.918962		21.4012	0.902434		21.4012	0.907167		21.4011	0.907992		21.4011	0.900682		21.4012	0.900474
21.4511	0.917887		21.4512	0.903524		21.4512	0.920864		21.4512	0.900549		21.4511	0.917554		21.4512	0.904747		21.4512	0.915418		21.4512	0.904082		21.4512	0.915483		21.4512	0.903817		21.4512	0.915492		21.4512	0.903621		21.4512	0.908		21.4511	0.912568		21.4511	0.905909		21.4512	0.903071
21.5011	0.921225		21.5012	0.904038		21.5012	0.920952		21.5012	0.900636		21.5011	0.916431		21.5012	0.903683		21.5012	0.91776		21.5012	0.909386		21.5012	0.921042		21.5012	0.904645		21.5012	0.921146		21.5012	0.908231		21.5012	0.912075		21.5011	0.912476		21.5011	0.905203		21.5012	0.905939
21.5511	0.921833		21.5512	0.904786		21.5512	0.924895		21.5512	0.902146		21.5512	0.921496		21.5512	0.907992		21.5512	0.921802		21.5512	0.906307		21.5512	0.919775		21.5512	0.905967		21.5512	0.919757		21.5512	0.909096		21.5512	0.910525		21.5511	0.912032		21.5511	0.911873		21.5512	0.906876
21.6011	0.92235		21.6012	0.903335		21.6012	0.921966		21.6012	0.903462		21.6012	0.922514		21.6012	0.909986		21.6012	0.920199		21.6012	0.908906		21.6012	0.921134		21.6012	0.911643		21.6012	0.924531		21.6012	0.906234		21.6012	0.910845		21.6011	0.916067		21.6011	0.908629		21.6012	0.907612
21.6511	0.924836		21.6512	0.907021		21.6512	0.92201		21.6512	0.905528		21.6512	0.921469		21.6512	0.908269		21.6512	0.923714		21.6512	0.909184		21.6512	0.922802		21.6512	0.90868		21.6512	0.922839		21.6512	0.912278		21.6512	0.911742		21.6511	0.913869		21.6511	0.909719		21.6512	0.907916
21.7012	0.925777		21.7012	0.907931		21.7012	0.924198		21.7012	0.906471		21.7012	0.922629		21.7012	0.91125		21.7012	0.922099		21.7012	0.907006		21.7012	0.924209		21.7012	0.911752		21.7012	0.925405		21.7012	0.913143		21.7012	0.915463		21.7011	0.916133		21.7011	0.909694		21.7012	0.909227
21.7512	0.929431		21.7512	0.905867		21.7512	0.926907		21.7512	0.90865		21.7512	0.923818		21.7512	0.910945		21.7512	0.923397		21.7512	0.914145		21.7512	0.92464		21.7512	0.911482		21.7512	0.929499		21.7512	0.915112		21.7512	0.916026		21.7511	0.918498		21.7511	0.914786		21.7512	0.909216
21.8012	0.926624		21.8012	0.909217		21.8012	0.926663		21.8012	0.910198		21.8012	0.923346		21.8012	0.908684		21.8012	0.923043		21.8012	0.912813		21.8012	0.926333		21.8012	0.913354		21.8012	0.927979		21.8012	0.911508		21.8012	0.916893		21.8011	0.920514		21.8011	0.91597		21.8012	0.913318
21.8512	0.928903		21.8512	0.909808		21.8512	0.928136		21.8512	0.90775		21.8512	0.924848		21.8512	0.913313		21.8512	0.924217		21.8512	0.91235		21.8512	0.929466		21.8512	0.913482		21.8512	0.931576		21.8512	0.916476		21.8512	0.916792		21.8511	0.917685		21.8511	0.916154		21.8512	0.912434
21.9012	0.930382		21.9012	0.912588		21.9012	0.931603		21.9012	0.909104		21.9012	0.927868		21.9012	0.914855		21.9012	0.926035		21.9012	0.914415		21.9012	0.929843		21.9012	0.913897		21.9012	0.928042		21.9012	0.919877		21.9012	0.917137		21.9011	0.922005		21.9011	0.916966		21.9012	0.909666
21.9512	0.92901		21.9512	0.911286		21.9512	0.930257		21.9512	0.909482		21.9512	0.927572		21.9512	0.917174		21.9512	0.930482		21.9512	0.915202		21.9512	0.928637		21.9512	0.916189		21.9512	0.93169		21.9512	0.915505		21.9512	0.919608		21.9512	0.922357		21.9511	0.918344		21.9512	0.912182
21.9912	0.92901		21.9912	0.911286		21.9912	0.930257		21.9912	0.909482		21.9912	0.927572		21.9912	0.917174		21.9912	0.930482		21.9912	0.915202		21.9912	0.928637		21.9912	0.916189		21.9912	0.93169		21.9912	0.915505		21.9912	0.919608		21.9912	0.922357		21.9911	0.918344		21.9912	0.912182
