# Supplementary material for: Binding and sequestration of poison frog alkaloids by a plasma globulin
Source: eLife journal article supplement (doi:10.7554/elife.85096), 2023-12-14
Supplement: fig5-data1 [file OsABG+PTX_R3 analysis_CapillaryScanRawData.xlsx]

## Sheet: RawData
NanoTemper Technologies	NanoTemper Technologies
MO.Affinity Analysis v3.0.5	MO.Affinity Analysis v3.0.5
Origin of exported data	Origin of exported data
Project Title:	20230407_BSA+PTX
Comment:
Project File Path:	C:\Users\nanotemper\Desktop\Aurora_MST\20230407_BSA\BSA+PTX analysis.nta3
Analysis-Set Name:	OsABG+PTX
Exported from:	Capillary Scan (Raw Data Inspection)
Exported on:	2023-04-11 08:23:01
Sample Information	Sample Information		Sample Information	Sample Information		Sample Information	Sample Information		Sample Information	Sample Information		Sample Information	Sample Information		Sample Information	Sample Information		Sample Information	Sample Information		Sample Information	Sample Information		Sample Information	Sample Information		Sample Information	Sample Information		Sample Information	Sample Information		Sample Information	Sample Information		Sample Information	Sample Information		Sample Information	Sample Information		Sample Information	Sample Information		Sample Information	Sample Information
Merge-Set Name:	OsABG+PTX_R3 (#22)		Merge-Set Name:	OsABG+PTX_R3 (#22)		Merge-Set Name:	OsABG+PTX_R3 (#22)		Merge-Set Name:	OsABG+PTX_R3 (#22)		Merge-Set Name:	OsABG+PTX_R3 (#22)		Merge-Set Name:	OsABG+PTX_R3 (#22)		Merge-Set Name:	OsABG+PTX_R3 (#22)		Merge-Set Name:	OsABG+PTX_R3 (#22)		Merge-Set Name:	OsABG+PTX_R3 (#22)		Merge-Set Name:	OsABG+PTX_R3 (#22)		Merge-Set Name:	OsABG+PTX_R3 (#22)		Merge-Set Name:	OsABG+PTX_R3 (#22)		Merge-Set Name:	OsABG+PTX_R3 (#22)		Merge-Set Name:	OsABG+PTX_R3 (#22)		Merge-Set Name:	OsABG+PTX_R3 (#22)		Merge-Set Name:	OsABG+PTX_R3 (#22)
Run Name:	OsABG+PTX_R3 (#22)		Run Name:	OsABG+PTX_R3 (#22)		Run Name:	OsABG+PTX_R3 (#22)		Run Name:	OsABG+PTX_R3 (#22)		Run Name:	OsABG+PTX_R3 (#22)		Run Name:	OsABG+PTX_R3 (#22)		Run Name:	OsABG+PTX_R3 (#22)		Run Name:	OsABG+PTX_R3 (#22)		Run Name:	OsABG+PTX_R3 (#22)		Run Name:	OsABG+PTX_R3 (#22)		Run Name:	OsABG+PTX_R3 (#22)		Run Name:	OsABG+PTX_R3 (#22)		Run Name:	OsABG+PTX_R3 (#22)		Run Name:	OsABG+PTX_R3 (#22)		Run Name:	OsABG+PTX_R3 (#22)		Run Name:	OsABG+PTX_R3 (#22)
Date of Measurement:	2023-04-11 08:11:00		Date of Measurement:	2023-04-11 08:11:27		Date of Measurement:	2023-04-11 08:11:54		Date of Measurement:	2023-04-11 08:12:20		Date of Measurement:	2023-04-11 08:12:47		Date of Measurement:	2023-04-11 08:13:13		Date of Measurement:	2023-04-11 08:13:40		Date of Measurement:	2023-04-11 08:14:07		Date of Measurement:	2023-04-11 08:14:34		Date of Measurement:	2023-04-11 08:15:00		Date of Measurement:	2023-04-11 08:15:27		Date of Measurement:	2023-04-11 08:15:54		Date of Measurement:	2023-04-11 08:16:21		Date of Measurement:	2023-04-11 08:16:47		Date of Measurement:	2023-04-11 08:17:14		Date of Measurement:	2023-04-11 08:17:40
Capillary Type:	Monolith Premium Capillary		Capillary Type:	Monolith Premium Capillary		Capillary Type:	Monolith Premium Capillary		Capillary Type:	Monolith Premium Capillary		Capillary Type:	Monolith Premium Capillary		Capillary Type:	Monolith Premium Capillary		Capillary Type:	Monolith Premium Capillary		Capillary Type:	Monolith Premium Capillary		Capillary Type:	Monolith Premium Capillary		Capillary Type:	Monolith Premium Capillary		Capillary Type:	Monolith Premium Capillary		Capillary Type:	Monolith Premium Capillary		Capillary Type:	Monolith Premium Capillary		Capillary Type:	Monolith Premium Capillary		Capillary Type:	Monolith Premium Capillary		Capillary Type:	Monolith Premium Capillary
Capillary Position:	1		Capillary Position:	9		Capillary Position:	2		Capillary Position:	10		Capillary Position:	3		Capillary Position:	11		Capillary Position:	4		Capillary Position:	12		Capillary Position:	5		Capillary Position:	13		Capillary Position:	6		Capillary Position:	14		Capillary Position:	7		Capillary Position:	15		Capillary Position:	8		Capillary Position:	16
Ligand:	PTX		Ligand:	PTX		Ligand:	PTX		Ligand:	PTX		Ligand:	PTX		Ligand:	PTX		Ligand:	PTX		Ligand:	PTX		Ligand:	PTX		Ligand:	PTX		Ligand:	PTX		Ligand:	PTX		Ligand:	PTX		Ligand:	PTX		Ligand:	PTX		Ligand:	PTX
Ligand Concentration:	0.001		Ligand Concentration:	3.90625e-06		Ligand Concentration:	0.0005		Ligand Concentration:	1.95313e-06		Ligand Concentration:	0.00025		Ligand Concentration:	9.76563e-07		Ligand Concentration:	0.000125		Ligand Concentration:	4.88281e-07		Ligand Concentration:	6.25e-05		Ligand Concentration:	2.44141e-07		Ligand Concentration:	3.125e-05		Ligand Concentration:	1.2207e-07		Ligand Concentration:	1.5625e-05		Ligand Concentration:	6.10352e-08		Ligand Concentration:	7.8125e-06		Ligand Concentration:	3.05176e-08
Target:	OsABG		Target:	OsABG		Target:	OsABG		Target:	OsABG		Target:	OsABG		Target:	OsABG		Target:	OsABG		Target:	OsABG		Target:	OsABG		Target:	OsABG		Target:	OsABG		Target:	OsABG		Target:	OsABG		Target:	OsABG		Target:	OsABG		Target:	OsABG
TargetConcentration:	5e-09		TargetConcentration:	5e-09		TargetConcentration:	5e-09		TargetConcentration:	5e-09		TargetConcentration:	5e-09		TargetConcentration:	5e-09		TargetConcentration:	5e-09		TargetConcentration:	5e-09		TargetConcentration:	5e-09		TargetConcentration:	5e-09		TargetConcentration:	5e-09		TargetConcentration:	5e-09		TargetConcentration:	5e-09		TargetConcentration:	5e-09		TargetConcentration:	5e-09		TargetConcentration:	5e-09
Measurement Settings	Measurement Settings		Measurement Settings	Measurement Settings		Measurement Settings	Measurement Settings		Measurement Settings	Measurement Settings		Measurement Settings	Measurement Settings		Measurement Settings	Measurement Settings		Measurement Settings	Measurement Settings		Measurement Settings	Measurement Settings		Measurement Settings	Measurement Settings		Measurement Settings	Measurement Settings		Measurement Settings	Measurement Settings		Measurement Settings	Measurement Settings		Measurement Settings	Measurement Settings		Measurement Settings	Measurement Settings		Measurement Settings	Measurement Settings		Measurement Settings	Measurement Settings
MST-Power:	Medium		MST-Power:	Medium		MST-Power:	Medium		MST-Power:	Medium		MST-Power:	Medium		MST-Power:	Medium		MST-Power:	Medium		MST-Power:	Medium		MST-Power:	Medium		MST-Power:	Medium		MST-Power:	Medium		MST-Power:	Medium		MST-Power:	Medium		MST-Power:	Medium		MST-Power:	Medium		MST-Power:	Medium
Excitation-Power:	15		Excitation-Power:	15		Excitation-Power:	15		Excitation-Power:	15		Excitation-Power:	15		Excitation-Power:	15		Excitation-Power:	15		Excitation-Power:	15		Excitation-Power:	15		Excitation-Power:	15		Excitation-Power:	15		Excitation-Power:	15		Excitation-Power:	15		Excitation-Power:	15		Excitation-Power:	15		Excitation-Power:	15
Excitation type:	Pico - RED		Excitation type:	Pico - RED		Excitation type:	Pico - RED		Excitation type:	Pico - RED		Excitation type:	Pico - RED		Excitation type:	Pico - RED		Excitation type:	Pico - RED		Excitation type:	Pico - RED		Excitation type:	Pico - RED		Excitation type:	Pico - RED		Excitation type:	Pico - RED		Excitation type:	Pico - RED		Excitation type:	Pico - RED		Excitation type:	Pico - RED		Excitation type:	Pico - RED		Excitation type:	Pico - RED
Thermostat Setpoint:	25		Thermostat Setpoint:	25		Thermostat Setpoint:	25		Thermostat Setpoint:	25		Thermostat Setpoint:	25		Thermostat Setpoint:	25		Thermostat Setpoint:	25		Thermostat Setpoint:	25		Thermostat Setpoint:	25		Thermostat Setpoint:	25		Thermostat Setpoint:	25		Thermostat Setpoint:	25		Thermostat Setpoint:	25		Thermostat Setpoint:	25		Thermostat Setpoint:	25		Thermostat Setpoint:	25
Included	Included		Included	Included		Included	Included		Included	Included		Included	Included		Included	Included		Included	Included		Included	Included		Included	Included		Included	Included		Included	Included		Included	Included		Included	Included		Included	Included		Included	Included		Included	Included
Position [capillary-index]	Raw Fluorescence [counts]		Position [capillary-index]	Raw Fluorescence [counts]		Position [capillary-index]	Raw Fluorescence [counts]		Position [capillary-index]	Raw Fluorescence [counts]		Position [capillary-index]	Raw Fluorescence [counts]		Position [capillary-index]	Raw Fluorescence [counts]		Position [capillary-index]	Raw Fluorescence [counts]		Position [capillary-index]	Raw Fluorescence [counts]		Position [capillary-index]	Raw Fluorescence [counts]		Position [capillary-index]	Raw Fluorescence [counts]		Position [capillary-index]	Raw Fluorescence [counts]		Position [capillary-index]	Raw Fluorescence [counts]		Position [capillary-index]	Raw Fluorescence [counts]		Position [capillary-index]	Raw Fluorescence [counts]		Position [capillary-index]	Raw Fluorescence [counts]		Position [capillary-index]	Raw Fluorescence [counts]
0.501177	100.272		8.50034	54.7704		1.50138	59.5749		9.50072	43.5688		2.50053	46.4974		10.501	39.5247		3.50018	40.3031		11.5008	32.4596		4.50116	48.5522		12.5008	29.0627		5.50167	38.2483		13.5003	39.6619		6.5016	36.3008		14.5005	37.9739		7.50033	36.775		15.5009	40.1331
0.502844	105.139		8.50159	61.5015		1.50312	58.4207		9.50211	45.2806		2.50178	41.496		10.5021	35.5702		3.50157	36.1756		11.5026	34.1893		4.5022	47.8872		12.5025	30.9863		5.50265	39.9601		13.5015	32.3582		6.50271	36.8705		14.5024	38.964		7.5013	40.655		15.5023	37.0226
0.504163	97.8649		8.50339	61.2688		1.5043	48.9071		9.50301	39.644		2.50254	38.4779		10.5031	29.0091		3.50247	33.7718		11.5036	33.2111		4.50394	33.6466		12.5037	35.7282		5.50376	35.1377		13.5022	35.3614		6.50355	31.7438		14.5039	36.9271		7.5029	47.2609		15.5032	36.9748
0.505135	81.5337		8.50485	64.2452		1.50527	57.4127		9.50433	39.0237		2.50379	41.7018		10.5047	34.4578		3.50372	29.8978		11.5044	34.1088		4.5056	40.6998		12.5047	31.2219		5.50542	36.9569		13.5036	35.2511		6.50493	21.6069		14.5047	37.8904		7.5047	40.1063		15.5045	39.8438
0.506455	99.1563		8.50568	64.9818		1.50687	55.4086		9.50613	35.9698		2.50553	48.1645		10.5065	42.516		3.50553	31.5142		11.5059	33.8046		4.50651	52.0415		12.5062	32.8055		5.50709	43.1154		13.5053	34.3921		6.5066	35.2123		14.5058	34.7232		7.50574	39.2891		15.5063	35.1825
0.508191	104.226		8.50679	49.9748		1.50861	47.4517		9.50759	40.8548		2.50692	48.1108		10.5076	47.4666		3.50699	40.3956		11.5076	36.104		4.50748	54.8002		12.508	39.0595		5.50813	39.2593		13.5066	31.5768		6.50792	39.4531		14.5074	46.6256		7.50658	42.4355		15.5078	32.3493
0.509649	92.792		8.50846	54.7972		1.50972	53.7892		9.50836	49.4081		2.50789	46.3662		10.5084	36.8675		3.50796	37.5057		11.5088	25.4452		4.50901	42.3788		12.5091	37.5773		5.50917	38.3676		13.5076	33.3722		6.50889	40.7803		14.509	44.1801		7.50803	37.3566		15.5085	30.882
0.510621	92.4341		8.50999	63.434		1.51055	52.635		9.50947	53.3299		2.50907	45.8771		10.5098	28.2426		3.50921	30.7388		11.5098	25.3378		4.5106	48.4896		12.5099	32.2986		5.51077	41.9702		13.5088	29.5697		6.51014	34.422		14.5101	54.5884		7.5097	37.2731		15.5097	41.9613
0.511802	103.836		8.51096	54.9761		1.51194	43.8133		9.5112	42.2685		2.51081	43.0558		10.5114	34.8544		3.51102	33.0471		11.5111	35.9489		4.51178	50.0046		12.5113	36.3456		5.51251	44.8422		13.5105	26.65		6.51188	32.5342		14.5111	50.4758		7.51088	36.6498		15.5114	39.6231
0.513469	100.794		8.51207	46.3483		1.51368	51.958		9.51266	44.195		2.51241	47.8156		10.5128	34.249		3.51247	35.4032		11.5129	33.2201		4.51283	49.3723		12.513	45.4476		5.51362	41.1531		13.5121	34.6099		6.51341	39.7633		14.5126	33.6585		7.51185	37.0971		15.5129	42.0329
0.515066	94.5396		8.51367	57.5469		1.51493	50.8635		9.5137	38.6748		2.51338	43.1214		10.5137	25.7553		3.51331	39.9065		11.5143	34.5472		4.51428	43.4584		12.5143	38.9581		5.51459	35.3823		13.513	34.9051		6.51431	37.279		14.5144	33.4825		7.51324	37.3089		15.5139	41.0636
0.516107	78.7691		8.51541	56.8103		1.5159	51.4391		9.51481	41.7316		2.51449	40.485		10.5151	27.6431		3.51435	45.6057		11.5153	35.43		4.51602	45.0003		12.5152	43.3302		5.51619	35.3167		13.5142	31.7409		6.51549	37.0613		14.5156	39.808		7.51505	43.7447		15.515	34.1029
0.517149	79.7085		8.51652	47.9557		1.51722	56.4912		9.51641	41.5885		2.51616	45.9725		10.5168	36.7482		3.51602	42.2685		11.5165	40.9443		4.51734	47.7142		12.5166	34.0104		5.51792	32.063		13.516	31.5351		6.51723	31.4903		14.5165	51.2453		7.51644	28.6959		15.5166	39.9363
0.518885	88.059		8.51749	54.6242		1.51895	52.4471		9.51815	38.7762		2.51782	45.0539		10.5183	25.7822		3.51761	45.9546		11.5183	41.8718		4.51824	46.2737		12.5183	26.7634		5.5191	25.0455		13.5176	24.8427		6.51889	37.2045		14.518	51.0723		7.51741	28.6392		15.5183	39.5695
0.520552	89.3206		8.51902	60.4517		1.52041	48.2599		9.51926	41.8957		2.51893	44.6305		10.5192	26.0267		3.51865	43.1512		11.5198	27.7654		4.51963	47.7201		12.5198	35.7252		5.51994	30.6255		13.5186	33.8315		6.5198	32.224		14.5198	35.3674		7.51859	33.4289		15.5194	38.7523
0.521524	92.1389		8.52082	40.491		1.52131	46.2528		9.52023	37.5594		2.51991	37.786		10.5204	28.6959		3.5197	41.9851		11.5208	28.171		4.52144	47.5233		12.5207	40.3628		5.52133	34.7142		13.5196	35.4986		6.52091	35.8863		14.521	44.6096		7.52039	37.6369		15.5205	41.0069
0.522427	99.7199		8.522	48.3077		1.52249	51.967		9.52176	46.2976		2.52157	42.352		10.5221	33.4438		3.52129	34.7083		11.5219	35.9996		4.52283	46.894		12.5219	36.2352		5.52306	39.0684		13.5213	33.5153		6.52264	42.7039		14.5219	38.63		7.52192	30.7686		15.522	40.0198
0.524024	96.7316		8.52291	58.5072		1.5243	59.1842		9.52356	40.7087		2.52331	47.3444		10.5237	32.9755		3.52303	35.4419		11.5237	32.6833		4.52373	51.4958		12.5236	42.0836		5.52431	43.1751		13.523	29.4266		6.52431	37.8308		14.5234	41.0785		7.52283	37.6846		15.5237	39.1161
0.525621	87.7548		8.52443	59.6047		1.5259	45.9069		9.52474	44.2219		2.52435	46.1365		10.5246	29.6115		3.52414	43.1691		11.5253	35.2809		4.52505	57.3381		12.5252	37.9053		5.52529	31.3889		13.524	33.7539		6.52521	31.1474		14.5252	47.92		7.52401	34.8753		15.5249	34.9498
0.526733	100.009		8.52624	52.0982		1.52687	44.4664		9.52565	39.9691		2.52518	47.3175		10.5258	33.0113		3.52511	44.0638		11.5261	38.9014		4.52685	50.8277		12.5262	37.0911		5.52661	24.7652		13.5249	26.2027		6.52612	26.7813		14.5265	48.9339		7.52581	39.9601		15.5259	38.3974
0.527705	100.146		8.52735	62.1039		1.52798	47.7619		9.52717	43.3033		2.52671	46.2379		10.5276	34.4399		3.52657	42.4444		11.5272	35.5642		4.52817	49.8108		12.5273	33.1008		5.52834	32.0301		13.5265	38.7702		6.52771	34.3713		14.5273	46.4616		7.52741	34.0641		15.5274	30.3779
0.529232	112.472		8.52818	65.8169		1.52972	53.0824		9.52898	45.1166		2.52831	51.9252		10.5292	34.249		3.52838	41.1054		11.5288	33.9209		4.52901	43.4077		12.5291	31.7796		5.52987	36.4231		13.528	43.0468		6.52938	28.0607		14.5285	38.3169		7.52824	32.4775		15.5293	31.9914
0.530968	107.742		8.52957	60.1863		1.53131	47.6963		9.53016	42.0209		2.52949	39.5456		10.5301	37.8009		3.52963	36.0026		11.5303	30.5956		4.53019	46.7002		12.5307	35.2868		5.53077	34.4071		13.5292	34.0313		6.53049	26.4413		14.5303	37.4699		7.52921	34.9737		15.5304	42.6383
0.532219	91.6527		8.53124	50.6816		1.53222	48.0303		9.53093	42.1521		2.53046	37.8904		10.531	36.4201		3.53053	32.5968		11.5315	27.6879		4.53185	45.0599		12.5316	36.1607		5.53195	36.7005		13.5302	32.8741		6.53146	30.7239		14.5317	38.0604		7.53088	31.4903		15.5312	44.6513
0.533121	80.8925		8.53256	55.334		1.53319	54.7107		9.53231	30.9476		2.53192	37.0106		10.5326	31.4903		3.53206	35.7789		11.5324	28.9106		4.53338	43.8849		12.5325	28.6691		5.53376	38.5167		13.5317	33.3573		6.53299	33.3632		14.5326	41.1441		7.53241	39.981		15.5326	35.8237
0.53451	87.0957		8.53353	48.087		1.53479	53.5387		9.53398	35.7431		2.53366	42.4563		10.5342	33.7122		3.53386	36.1219		11.534	39.6649		4.53442	49.256		12.5341	36.6289		5.53529	34.2997		13.5334	36.3396		6.53473	44.5619		14.5339	39.3219		7.53345	36.7482		15.5343	39.7186
0.536316	89.4369		8.53478	50.944		1.53638	49.4976		9.5353	34.7858		2.53504	50.7949		10.5353	34.5323		3.53511	39.6023		11.5357	37.1687		4.53553	55.5517		12.5357	35.9937		5.53626	30.87		13.5347	40.9711		6.53598	38.6807		14.5356	42.3042		7.53449	31.3889		15.5356	37.1269
0.537635	80.3617		8.53652	57.6125		1.53749	44.7527		9.53627	39.0982		2.53602	51.457		10.5363	36.781		3.53588	44.5171		11.5369	32.7012		4.5372	37.8516		12.5368	40.831		5.53744	37.792		13.5357	35.3823		6.53695	33.1247		14.5371	40.2822		7.53602	32.8503		15.5366	26.6828
0.538538	84.5995		8.53804	65.9451		1.53854	45.8741		9.53759	41.3201		2.53727	43.4196		10.5378	38.8537		3.5372	40.0466		11.5378	32.9964		4.53887	38.7732		12.5379	31.4635		5.53917	42.7755		13.537	36.8377		6.53834	29.9783		14.5382	42.0716		7.53776	36.0115		15.5379	26.9304
0.539927	91.3128		8.53902	58.2149		1.54006	63.7949		9.53933	37.7622		2.539	43.1989		10.5396	35.4449		3.53886	34.1058		11.5393	34.2878		4.53998	42.0627		12.5394	34.2967		5.54077	38.2811		13.5388	32.1733		6.54014	33.8494		14.5392	41.6004		7.53901	26.9214		15.5396	22.7492
0.541732	90.6745		8.5402	48.5552		1.5418	58.9188		9.54079	36.5006		2.54053	41.845		10.5408	35.1795		3.54018	41.0845		11.5411	31.1653		4.54095	44.0161		12.5411	33.408		5.54167	40.0884		13.5402	28.3649		6.54146	42.3371		14.5409	41.8032		7.53991	27.4821		15.5411	28.1859
0.543121	96.8718		8.54193	48.2182		1.54305	49.259		9.54176	46.39		2.54143	34.923		10.5418	32.5968		3.54115	47.6008		11.5424	33.8106		4.54255	49.268		12.5424	35.764		5.54265	39.4382		13.5411	32.8294		6.54237	43.0707		14.5426	42.0239		7.54137	32.1852		15.5421	40.8399
0.543955	91.8704		8.54353	51.4719		1.54395	53.9949		9.54294	42.0776		2.54268	37.8516		10.5432	29.3132		3.5424	47.5621		11.5433	27.5835		4.54428	48.6715		12.5434	45.0957		5.54431	40.4731		13.5424	39.8468		6.54375	34.6993		14.5437	38.3825		7.54317	31.3293		15.5432	38.3139
0.545066	92.3088		8.5445	51.7493		1.54534	54.3648		9.54467	39.3995		2.54449	41.8271		10.5449	29.7159		3.54414	41.3499		11.5447	32.7131		4.54546	42.5548		12.5447	47.237		5.54591	34.7023		13.5442	48.2271		6.54556	26.8588		14.5446	44.7855		7.54449	24.6728		15.545	31.0818
0.546802	100.955		8.54562	49.9599		1.54715	52.1519		9.54627	32.555		2.54595	43.8401		10.5462	30.5449		3.54574	40.0108		11.5466	40.8697		4.54637	36.8705		12.5465	41.4811		5.54695	29.2089		13.5456	35.6686		6.54688	29.4057		14.5463	49.256		7.5454	28.3977		15.5466	31.6096
0.54826	96.4752		8.54735	56.3182		1.54854	47.5591		9.54725	41.4453		2.54678	47.407		10.5471	25.6092		3.54671	41.6959		11.5478	37.7264		4.54796	43.0349		12.5479	32.8234		5.54799	35.3525		13.5465	39.1042		6.54771	31.5321		14.548	47.9945		7.54685	29.2387		15.5476	34.7291
0.549302	81.8498		8.54895	53.3925		1.54937	48.9697		9.54829	43.2288		2.54789	43.5926		10.5485	28.6899		3.54782	40.2524		11.5486	32.7668		4.54977	42.8291		12.5488	34.0223		5.54952	34.5055		13.5476	38.3228		6.54889	29.6652		14.5491	41.4602		7.54866	30.7925		15.5487	34.5532
0.550413	86.2518		8.54985	56.4971		1.55076	47.2221		9.55002	36.0533		2.54956	44.0072		10.5504	23.4202		3.54949	33.7271		11.5499	23.8288		4.55081	45.6504		12.5501	33.1485		5.55126	43.181		13.5493	37.8278		6.55056	19.3762		14.5499	41.1411		7.54991	38.964		15.5504	34.079
0.55208	95.819		8.55082	63.4429		1.55263	50.4221		9.55169	39.4323		2.55109	37.0494		10.5517	24.3894		3.55115	42.2506		11.5516	24.5893		4.55164	49.0562		12.552	35.0662		5.55251	39.6023		13.5508	36.8675		6.55202	30.1781		14.5515	38.4302		7.55074	29.2536		15.5521	45.2001
0.553746	90.4747		8.55242	60.7917		1.55395	44.5678		9.55259	34.4428		2.55213	36.2412		10.5525	31.3949		3.5522	48.8206		11.553	28.0637		4.5531	52.0714		12.5534	27.154		5.55341	38.1797		13.5518	37.4878		6.55306	30.9983		14.5531	33.5004		7.55199	29.1969		15.5529	40.8638
0.554788	101.053		8.55395	65.116		1.55472	46.566		9.55349	33.9448		2.55317	48.081		10.5537	32.6475		3.55324	45.0182		11.554	32.7877		4.55477	47.3444		12.5541	31.5291		5.55487	42.3221		13.5529	38.8179		6.55417	34.3236		14.5543	37.6816		7.55373	33.3334		15.5539	31.6335
0.55583	92.7264		8.55506	54.4005		1.55597	35.4121		9.55509	31.9407		2.55477	44.3799		10.5554	42.7874		3.5549	38.6748		11.5551	41.7525		4.55609	38.976		12.5553	42.6234		5.55667	33.4974		13.5546	40.9861		6.55584	38.4272		14.5553	40.0108		7.55505	36.9271		15.5555	27.2256
0.557357	91.9062		8.5561	54.5735		1.55763	40.6789		9.55676	43.0349		2.5565	47.8036		10.5569	37.7085		3.55664	33.909		11.5568	40.1957		4.55699	44.204		12.557	41.6302		5.55799	36.9927		13.5562	38.3825		6.5575	37.0852		14.5567	43.6403		7.55602	32.7012		15.5571	31.0579
0.559094	102.816		8.55763	62.0323		1.55902	47.8305		9.55787	52.8408		2.55761	54.0099		10.5578	37.2104		3.55761	35.0333		11.5584	33.3096		4.55831	42.9574		12.5584	31.3561		5.5589	38.6718		13.5573	36.8585		6.55861	31.6275		14.5585	45.8264		7.55727	31.5082		15.5582	35.9608
0.560274	99.7169		8.55937	68.0119		1.56006	55.0746		9.55884	42.5697		2.55859	40.8876		10.559	30.7895		3.55852	30.6732		11.5594	33.5988		4.56012	43.8521		12.5594	31.5917		5.56029	35.9787		13.5583	36.781		6.55959	37.3118		14.5599	47.067		7.55894	45.555		15.5591	36.945
0.561177	81.5874		8.56061	62.59		1.56117	52.3398		9.5603	30.712		2.56004	38.302		10.5607	33.1247		3.56004	39.7544		11.5605	31.1653		4.56164	44.8273		12.5605	27.3121		5.56209	34.1983		13.5599	34.7083		6.56118	32.6982		14.5608	43.7537		7.56053	45.9844		15.5607	30.4942
0.562774	101.682		8.56159	57.7378		1.56284	55.674		9.56211	31.0579		2.56185	40.9801		10.5624	25.6062		3.56164	36.2919		11.5622	34.079		4.56255	46.4169		12.5623	30.5479		5.56341	36.4708		13.5617	30.7418		6.56292	30.9088		14.562	47.917		7.56158	32.5282		15.5625	36.0384
0.56458	95.4254		8.56298	59.7419		1.56451	55.9692		9.56343	28.9166		2.5631	37.4103		10.5634	29.4087		3.56282	40.7773		11.5638	37.4699		4.56373	49.0741		12.5639	34.2907		5.56417	35.0244		13.5628	29.2775		6.56403	33.6824		14.5639	43.5121		7.56262	30.5479		15.5637	36.5991
0.565691	82.7058		8.56471	55.7068		1.56555	50.7293		9.56433	38.2095		2.564	42.1611		10.5644	29.2089		3.56379	37.4639		11.5649	31.5231		4.56546	44.0161		12.565	33.566		5.56542	33.2529		13.5638	34.4071		6.565	30.6702		14.5653	40.7206		7.56421	35.8594		15.5646	33.2261
0.566455	92.3238		8.5661	54.2246		1.56659	45.0659		9.56572	39.9214		2.56546	46.4616		10.566	35.2779		3.56525	32.6087		11.566	29.7994		4.56706	46.8612		12.5659	29.0329		5.56709	36.5305		13.5653	32.558		6.5666	28.3738		14.5662	35.6388		7.56595	35.5731		15.566	30.6702
0.567913	95.8429		8.567	57.3352		1.56819	49.7153		9.56745	38.8149		2.56727	46.1276		10.5677	27.2704		3.56699	30.6046		11.5676	32.2091		4.56803	47.7619		12.5676	33.0412		5.56855	31.037		13.5671	27.1421		6.56834	33.2589		14.5675	32.4029		7.56706	32.4059		15.5678	36.7392
0.56958	87.3999		8.56832	57.6244		1.56993	45.7936		9.56884	37.7711		2.56852	45.4148		10.5688	31.1354		3.56838	40.8131		11.5693	32.9338		4.56914	47.5442		12.5693	33.1843		5.56959	31.4754		13.5683	31.8691		6.56945	39.1281		14.5693	40.3419		7.56803	30.8641		15.5691	39.3517
0.57083	76.7829		8.5702	60.1952		1.57104	38.0902		9.56974	32.4656		2.56935	51.2661		10.5699	37.0464		3.56928	45.895		11.5703	31.8363		4.57088	51.3109		12.5705	28.6303		5.5707	39.2682		13.569	32.4089		6.57028	27.2554		14.5708	37.2015		7.5697	43.4107		15.5701	28.171
0.571802	94.5516		8.57152	65.4143		1.57201	45.3313		9.57106	37.0315		2.57067	36.9062		10.5715	27.9354		3.5706	40.7743		11.5712	39.2682		4.57248	51.3407		12.5714	28.3679		5.57237	44.2338		13.5704	36.3545		6.57174	33.1097		14.5716	43.0081		7.57144	43.4793		15.5714	29.4176
0.573121	93.7076		8.57228	55.2744		1.57361	46.3185		9.57294	40.998		2.57234	40.1838		10.5732	35.6805		3.5724	42.2864		11.5727	33.6078		4.57338	43.8103		12.573	33.3543		5.57404	29.9873		13.5721	35.3763		6.57348	29.3222		14.5726	42.176		7.57241	33.3662		15.5732	35.9221
0.574927	89.1625		8.57346	60.5889		1.57541	42.51		9.57426	37.1627		2.57366	42.352		10.5742	38.4809		3.57386	37.8009		11.5744	42.1014		4.57435	42.9872		12.5748	31.2846		5.57508	28.7466		13.5734	38.8388		6.57466	23.4411		14.5743	43.9594		7.57331	34.2639		15.5746	38.0037
0.576316	87.9994		8.57513	65.8914		1.57645	45.6862		9.57509	33.2439		2.57463	35.7044		10.5751	33.8583		3.57477	32.1405		11.5756	36.8526		4.57595	46.5093		12.5759	25.9253		5.57612	34.7262		13.5744	32.6087		6.57563	29.2625		14.5759	44.7706		7.57477	37.5564		15.5754	46.0471
0.577288	90.7133		8.57659	69.4464		1.57729	45.0301		9.5762	43.4763		2.57588	38.0455		10.5765	42.1164		3.57602	32.9278		11.5765	29.7099		4.57755	36.0772		12.5767	25.9671		5.57772	37.5594		13.5757	31.4844		6.57695	33.0531		14.5769	44.7975		7.57644	34.9946		15.5766	41.1232
0.578469	90.4538		8.57763	68.3548		1.57874	33.6973		9.57794	50.8456		2.57761	43.8193		10.5782	42.5548		3.57789	34.1834		11.5779	40.8399		4.57866	32.9964		12.5781	30.3004		5.57945	42.7576		13.5774	31.4307		6.57875	33.6525		14.578	46.6942		7.57762	32.8145		15.5782	38.7881
0.580205	87.1852		8.57874	67.4721		1.58041	43.6045		9.5794	51.3526		2.57914	43.6284		10.5794	35.1884		3.57928	41.0815		11.5797	33.9299		4.57963	39.5247		12.5798	24.9292		5.58056	43.9445		13.5789	32.7489		6.58021	28.7764		14.5796	47.2698		7.57859	42.1999		15.5797	34.8335
0.581733	92.3685		8.58041	59.7479		1.58166	46.8284		9.58044	43.2884		2.58011	41.0159		10.5804	33.0322		3.58011	39.7186		11.581	24.2194		4.58116	35.6298		12.581	26.5934		5.58154	45.5162		13.5799	30.5151		6.58111	36.7631		14.5813	58.03		7.57998	39.5575		15.5807	41.0904
0.582705	85.53		8.58207	58.4446		1.58263	48.075		9.58155	40.6819		2.58122	38.6867		10.5817	36.6527		3.58122	46.4765		11.582	26.3309		4.58296	36.5424		12.582	26.7514		5.58313	41.2008		13.581	30.6792		6.5823	36.7691		14.5824	55.0537		7.58171	33.3185		15.5819	34.8156
0.583885	84.5011		8.58311	68.6441		1.58395	49.0294		9.58315	39.2444		2.58296	42.0418		10.5835	33.915		3.58289	47.2102		11.5833	31.5649		4.58421	40.1838		12.5833	34.9677		5.58487	38.4242		13.5828	36.3098		6.5841	37.9172		14.5834	39.8647		7.5831	34.6099		15.5835	31.2011
0.585621	80.7225		8.58409	74.564		1.58576	54.9344		9.58481	40.3329		2.58463	42.6919		10.5849	28.678		3.58435	40.9622		11.585	33.8702		4.58512	46.8702		12.5851	32.6296		5.58591	36.1935		13.5844	35.3375		6.58563	37.0822		14.5849	36.0175		7.58408	36.0861		15.5852	31.6782
0.587219	92.9143		8.58575	60.3771		1.58715	52.1906		9.58593	40.7236		2.58567	43.1005		10.5859	35.4956		3.58539	38.9283		11.5865	32.2836		4.58651	42.5727		12.5865	27.676		5.58674	38.9491		13.5854	29.3461		6.5866	31.6335		14.5867	39.5575		7.58533	36.3963		15.5863	30.9326
0.588121	90.8803		8.58749	61.7311		1.58805	43.9803		9.5869	36.3694		2.58664	42.0567		10.5871	34.7053		3.5865	30.3541		11.5874	34.3981		4.58838	43.6582		12.5874	28.7198		5.5882	32.9666		13.5865	36.951		6.58771	37.8725		14.5879	45.5759		7.58713	37.2999		15.5873	38.6956
0.589094	98.6642		8.5886	63.5533		1.5893	43.026		9.58849	39.811		2.58838	43.363		10.5888	34.6576		3.58817	39.7931		11.5886	33.3036		4.5897	49.5811		12.5886	38.3646		5.58987	28.4722		13.5883	37.5594		6.58952	34.6993		14.5888	47.2996		7.58859	38.5256		15.5889	39.7752
0.590691	84.5936		8.58957	65.6081		1.59104	51.1677		9.59023	40.5566		2.59004	39.3816		10.5903	27.5268		3.58984	31.8631		11.5904	23.7244		4.59053	47.4756		12.5905	38.5525		5.59112	26.1102		13.5899	31.9317		6.59105	30.032		14.5903	41.666		7.58949	49.4648		15.5907	43.9833
0.592288	79.0972		8.59117	62.3425		1.59256	58.5639		9.59134	42.5727		2.59102	33.8941		10.5913	38.2364		3.59095	46.2021		11.5919	23.8795		4.59192	49.1725		12.592	33.3931		5.59209	27.6133		13.5908	30.0588		6.59195	25.973		14.5921	31.1504		7.59074	48.2003		15.5918	38.4779
0.59333	80.3945		8.59291	71.537		1.59354	52.2354		9.59231	30.8223		2.59192	38.8597		10.5924	42.6293		3.59192	37.1747		11.5928	28.2575		4.5938	46.4765		12.593	45.883		5.59348	40.8996		13.5917	29.7934		6.59292	35.8893		14.5933	41.9046		7.59255	35.257		15.5928	34.6337
0.594371	75.0382		8.59395	68.0626		1.59472	39.6828		9.59391	35.1765		2.59345	37.4699		10.5942	26.5635		3.59352	40.7206		11.5938	28.8599		4.59512	40.0436		12.5941	40.8668		5.59522	46.8791		13.5933	33.1247		6.59459	36.4261		14.5941	40.0407		7.59408	34.1178		15.5944	36.444
0.595899	79.1568		8.59478	66.5654		1.59645	40.2763		9.59565	41.1083		2.59504	40.0287		10.5958	25.6062		3.59532	41.4692		11.5955	29.6562		4.59588	41.5378		12.5959	37.1657		5.5966	38.466		13.5949	42.859		6.59612	28.3321		14.5955	40.2673		7.59491	35.6775		15.5962	37.4699
0.597635	77.3406		8.59624	66.0883		1.59798	49.4916		9.59676	31.3502		2.59622	34.9588		10.5967	33.9657		3.5965	43.3958		11.597	27.1421		4.59713	41.7287		12.5974	36.781		5.59758	37.2283		13.596	36.7094		6.59723	31.6484		14.5971	45.5222		7.59595	34.1953		15.5972	28.7466
0.598885	84.7457		8.59798	60.6038		1.59888	45.9218		9.59752	37.0524		2.5972	42.6353		10.5977	40.1749		3.5974	36.2859		11.5981	35.2779		4.5988	45.6266		12.5983	31.1533		5.59883	36.8466		13.597	36.6885		6.59827	32.6206		14.5985	37.9172		7.59762	33.2201		15.598	30.4435
0.599788	81.6232		8.59916	63.4489		1.59993	49.8316		9.59898	41.7316		2.59866	46.1127		10.5993	39.0595		3.59893	53.2792		11.5991	38.5883		4.60026	39.978		12.5993	32.4268		5.60063	32.0152		13.5985	36.3843		6.5998	39.1937		14.5994	43.0319		7.59915	32.4089		15.5995	34.4727
0.601177	81.9542		8.60013	79.2075		1.60152	54.2306		9.60065	39.0893		2.60039	47.8901		10.6008	34.5979		3.60074	53.5029		11.6007	29.9097		4.60123	39.1907		12.6009	30.0081		5.60216	38.7314		13.6003	33.8822		6.60153	36.3664		14.6007	47.5084		7.60012	31.9258		15.6012	38.8597
0.602983	74.2897		8.60152	80.302		1.60312	46.3035		9.6019	41.6511		2.60178	37.4908		10.6019	37.0762		3.60192	37.5981		11.6024	25.815		4.60241	43.8222		12.6025	34.7888		5.60306	38.2543		13.6016	36.3933		6.60278	37.9053		14.6024	39.6709		7.60123	35.7402		15.6024	37.1478
0.604302	89.2013		8.60325	75.4379		1.60416	38.9104		9.60287	42.0358		2.60268	43.6344		10.603	36.9957		3.60268	36.2203		11.6036	29.0598		4.60407	50.109		12.6036	40.4373		5.60431	43.3003		13.6025	37.798		6.60368	36.0354		14.604	43.8968		7.60283	31.9019		15.6034	35.8087
0.605205	94.0803		8.60471	78.2919		1.6052	37.291		9.60419	39.7842		2.604	38.5197		10.6045	32.4357		3.60407	35.2272		11.6046	31.0609		4.60574	38.0365		12.6046	36.2949		5.60612	41.496		13.6039	38.6777		6.60514	38.0216		14.605	40.6699		7.60456	29.5906		15.6048	33.3901
0.606594	103.892		8.60568	72.1454		1.60673	46.727		9.60592	40.6908		2.60581	44.538		10.6062	31.0311		3.60574	37.4431		11.606	35.6298		4.60678	46.909		12.6061	30.7925		5.60765	29.3431		13.6057	36.6557		6.60695	25.9253		14.6061	31.0847		7.60567	29.5846		15.6066	36.0533
0.608469	94.7782		8.60686	66.6758		1.60847	47.8573		9.60745	42.6383		2.6072	48.7461		10.6075	28.4722		3.60699	32.7459		11.6078	31.884		4.60776	57.5379		12.6079	28.9882		5.60848	29.522		13.607	39.3756		6.60827	31.7707		14.6078	34.1386		7.60665	30.8849		15.608	33.3931
0.609719	81.82		8.6086	63.2103		1.60972	44.3531		9.60836	38.0097		2.60817	45.2508		10.6084	38.9909		3.60796	40.0586		11.609	33.6167		4.60942	56.4792		12.6091	38.7314		5.60952	37.3238		13.6079	26.6262		6.60917	35.8714		14.6094	39.6351		7.60817	30.5927		15.6089	35.5702
0.610552	82.9116		8.61013	62.9061		1.61062	43.7507		9.60954	37.5474		2.60942	41.0875		10.6099	33.4169		3.60928	40.4701		11.6099	37.5892		4.61116	47.7082		12.61	37.3118		5.61119	32.555		13.6093	30.5628		6.61056	33.6973		14.6105	45.1404		7.60998	36.6796		15.6101	34.5025
0.611802	78.8705		8.6111	55.5159		1.61208	48.9966		9.61127	44.9943		2.61122	44.5082		10.6116	31.9347		3.61102	40.494		11.6114	34.6874		4.61227	47.6784		12.6115	36.5901		5.61272	37.5683		13.6111	42.2804		6.61236	47.8066		14.6115	41.6541		7.61123	36.3903		15.6119	32.7131
0.613469	94.0535		8.61228	72.4734		1.61388	41.6601		9.61287	45.0778		2.61268	43.9236		10.6129	39.9989		3.61254	40.5984		11.6132	34.6367		4.61324	46.3155		12.6133	32.1315		5.61383	41.6094		13.6125	33.9895		6.61368	37.789		14.6132	48.9638		7.61213	40.3956		15.6135	29.3759
0.614857	82.5268		8.61402	74.3165		1.6152	36.3873		9.61384	45.9129		2.61352	45.6743		10.6138	37.3894		3.61352	34.4309		11.6144	32.2866		4.61484	41.3529		12.6146	37.8874		5.61487	39.4293		13.6133	36.1279		6.61452	30.5748		14.6149	48.3941		7.61359	29.5697		15.6144	35.8207
0.615899	76.6069		8.61561	63.1805		1.61604	48.8475		9.61495	38.123		2.61463	51.2124		10.6152	31.2309		3.61463	37.4431		11.6153	25.132		4.61658	33.915		12.6155	37.3715		5.61647	32.9069		13.6144	35.4837		6.61577	37.6936		14.6158	42.7874		7.61546	39.7991		15.6155	25.6003
0.61708	80.3497		8.61645	59.9805		1.61743	46.059		9.61669	40.0615		2.61629	43.7775		10.6171	30.7299		3.61636	37.8874		11.6166	28.1651		4.61762	34.5085		12.6168	28.8808		5.6182	30.4972		13.6161	43.9952		6.61743	32.4954		14.6168	38.3288		7.61665	45.1852		15.6173	25.0098
0.618746	88.7151		8.61749	66.6549		1.6193	47.2967		9.61829	46.2976		2.61775	41.2217		10.6183	28.1293		3.61803	34.1386		11.6183	28.4484		4.61845	44.1175		12.6187	36.2352		5.61938	29.6562		13.6176	45.5937		6.61889	37.8039		14.6183	41.9911		7.61748	44.4664		15.6189	24.7503
0.620413	98.357		8.61909	70.4782		1.62062	43.4823		9.61919	45.1076		2.61879	39.2861		10.6192	33.9597		3.619	41.2425		11.6197	35.43		4.61991	48.2957		12.62	39.9124		5.62036	29.1641		13.6185	34.759		6.61987	33.6764		14.6199	44.374		7.61873	37.3446		15.6198	28.1979
0.621455	99.1891		8.62062	69.8848		1.62138	40.9771		9.62016	36.4738		2.61991	40.2196		10.6204	31.0012		3.62004	38.5465		11.6206	51.7105		4.62164	59.8254		12.6208	40.6252		5.62181	33.4766		13.6196	33.8613		6.62105	34.1893		14.6211	45.9039		7.62046	34.5114		15.6207	33.6674
0.622427	93.6718		8.62173	65.793		1.62263	44.9138		9.62176	33.5392		2.6215	37.0613		10.6221	31.7259		3.62178	37.5594		11.6219	37.7234		4.62283	50.8247		12.6221	42.7963		5.62355	38.302		13.6214	31.5977		6.62278	26.1908		14.6221	51.0812		7.62178	37.5773		15.6224	35.8952
0.624094	88.4109		8.62277	71.6503		1.62437	45.9397		9.62336	43.3988		2.62317	42.1253		10.6235	33.1336		3.62345	41.1352		11.6235	31.7319		4.6238	45.8741		12.6238	38.6628		5.62487	42.7844		13.623	31.4546		6.62438	30.6046		14.6235	46.8732		7.62276	42.6919		15.6239	41.1292
0.62583	94.7842		8.6243	78.0026		1.62576	44.0578		9.62447	41.2455		2.62428	36.0056		10.6244	32.3075		3.62435	33.6555		11.6251	38.0962		4.62519	45.7011		12.6252	28.2784		5.62577	37.291		13.6241	35.4509		6.62542	32.8652		14.6253	42.1223		7.62401	35.263		15.6251	41.7823
0.626871	88.0829		8.62603	64.0424		1.62673	44.4068		9.62544	40.4045		2.62532	43.4644		10.6257	34.073		3.62532	34.7858		11.6261	34.2371		4.62699	45.9546		12.6261	32.1226		5.62723	34.4309		13.6251	34.5353		6.62646	31.1235		14.6267	45.1971		7.62574	27.5567		15.6261	33.5601
0.627844	83.9434		8.62728	64.8148		1.62791	43.3779		9.62697	36.1845		2.62685	48.4389		10.6274	30.9535		3.62692	32.728		11.6272	28.4424		4.62838	37.9888		12.6273	28.5408		5.62904	39.1281		13.6267	32.8175		6.62813	32.1345		14.6276	41.6929		7.62727	29.7785		15.6276	32.2359
0.62951	90.6626		8.62819	70.5379		1.62958	42.2893		9.62877	40.9383		2.62859	37.0375		10.629	34.762		3.62852	45.886		11.6289	30.6344		4.62928	41.0517		12.629	30.9416		5.63029	36.2293		13.6285	28.9554		6.6298	35.1765		14.6289	45.0539		7.62824	25.475		15.6294	34.7053
0.631246	84.5936		8.62964	77.3286		1.63118	44.4306		9.63002	43.6731		2.62984	40.819		10.63	43.4793		3.62963	44.6275		11.6306	32.4984		4.63053	47.9856		12.6306	34.0701		5.63105	29.2685		13.6296	28.3231		6.63091	38.5346		14.6307	44.9406		7.62935	31.723		15.6306	39.4442
0.632288	76.2848		8.63145	77.8088		1.63222	48.6685		9.63092	40.3508		2.63081	43.2556		10.6311	32.722		3.6306	38.7016		11.6316	29.4982		4.63234	52.2026		12.6316	28.5975		5.6323	36.1875		13.6305	27.0049		6.63188	26.7455		14.6321	36.6408		7.63109	28.7227		15.6315	37.4669
0.633121	87.4775		8.6327	64.0334		1.63326	43.4703		9.63238	38.3079		2.63227	45.6862		10.6327	48.0393		3.63213	42.1104		11.6326	45.4476		4.63387	47.5233		12.6327	31.6424		5.63404	43.2258		13.6321	32.0242		6.63355	30.5748		14.633	32.9815		7.63276	28.4036		15.633	34.8872
0.63458	93.293		8.63367	64.6448		1.63493	41.9165		9.63412	41.7704		2.63407	44.3442		10.6344	38.5435		3.63386	37.5266		11.6343	31.1056		4.63477	43.7477		12.6343	28.2933		5.63542	37.1866		13.634	31.7796		6.63528	26.2206		14.6343	39.6798		7.63373	39.8737		15.6347	29.9157
0.636246	97.9067		8.63506	65.0295		1.63659	38.3228		9.63544	34.8484		2.63525	49.2203		10.6355	36.7959		3.63518	38.7195		11.636	39.7066		4.63595	46.8851		12.636	36.6587		5.6364	32.0868		13.635	37.0762		6.63632	24.297		14.6361	41.3946		7.63477	46.909		15.636	31.6842
0.637496	83.9941		8.63687	72.2408		1.6377	49.3455		9.63634	34.6665		2.63602	48.5492		10.6364	36.4738		3.63609	41.2306		11.637	41.836		4.63776	51.2363		12.6371	46.5302		5.63765	37.6011		13.6358	45.0629		6.63716	36.3366		14.6376	35.4628		7.63651	45.1643		15.6369	32.722
0.638469	76.0612		8.63818	69.9206		1.63868	46.2618		9.63773	34.5174		2.63741	50.8188		10.6381	51.4719		3.63747	46.7449		11.6378	35.8923		4.63935	40.2763		12.6382	35.7193		5.63931	38.7374		13.6373	37.9471		6.63868	43.1542		14.6384	33.2887		7.63817	33.1306		15.6383	34.2371
0.639858	87.2538		8.63895	76.1506		1.64034	46.1902		9.63954	40.8041		2.63907	48.1854		10.6399	40.321		3.63928	46.0023		11.6394	36.3307		4.64019	42.1223		12.6398	26.9781		5.64091	37.9799		13.639	32.6475		6.64035	38.8179		14.6395	39.6768		7.63915	32.9159		15.6402	38.8269
0.641594	96.0755		8.6402	62.0442		1.64208	38.4034		9.64086	39.2623		2.64039	38.0604		10.6409	31.2756		3.6406	40.6371		11.641	29.5071		4.64116	43.2377		12.6415	33.5839		5.64195	36.268		13.6401	40.0794		6.64153	40.2435		14.6412	32.3314		7.64005	46.4348		15.6415	33.8911
0.642982	99.8929		8.64187	62.0383		1.64312	33.1426		9.64169	35.9131		2.64136	43.2437		10.6417	31.1265		3.6415	39.6023		11.6422	30.867		4.64283	42.0985		12.6425	29.3968		5.64306	31.55		13.6411	33.3871		6.6425	38.9968		14.6426	38.0157		7.64158	38.5167		15.6423	28.3082
0.643955	93.0455		8.64332	53.2076		1.64395	44.4157		9.64294	33.6615		2.64268	48.6238		10.6432	37.0375		3.64289	36.1487		11.6432	38.0753		4.64435	46.9298		12.6434	34.5234		5.64466	33.4766		13.6425	38.2423		6.64389	35.8237		14.6437	38.6897		7.64324	35.1497		15.6435	35.8624
0.645135	88.2946		8.6443	60.6276		1.64541	54.5437		9.64461	32.564		2.64442	46.3721		10.6449	41.7197		3.6447	33.3841		11.6447	35.0065		4.64546	49.3008		12.6449	32.0749		5.64633	38.7046		13.6443	39.3995		6.6457	29.1969		14.6448	36.9599		7.64435	34.0134		15.6452	39.1967
0.646941	86.6156		8.64548	69.9176		1.64715	45.2925		9.64599	39.5903		2.64588	49.6587		10.6461	34.6069		3.64609	41.7197		11.6464	39.7484		4.64651	49.3485		12.6466	36.1964		5.64744	37.7681		13.6457	27.6431		6.64709	39.644		14.6464	36.9331		7.64539	30.3451		15.6466	42.2118
0.648469	89.6456		8.64714	70.5289		1.64833	49.4111		9.64704	38.2155		2.64685	39.5128		10.6471	34.6516		3.64685	48.0154		11.6477	42.5786		4.64803	47.9319		12.6477	34.7351		5.64841	30.7746		13.6466	29.9992		6.64806	33.8344		14.6481	45.3134		7.64685	30.8521		15.6476	45.4357
0.649371	97.1164		8.64874	68.3757		1.64923	47.7589		9.64815	38.8		2.64803	40.664		10.6485	29.531		3.64803	41.9523		11.6486	29.7427		4.64977	43.9863		12.6487	28.7943		5.65008	36.5692		13.6478	31.0728		6.64931	25.4601		14.6492	43.688		7.64859	36.4291		15.6488	33.0889
0.650552	108.014		8.64978	71.1582		1.65069	43.1303		9.64981	37.5415		2.64977	46.1604		10.6502	32.7906		3.6497	38.1886		11.6499	28.4842		4.65102	38.5286		12.6501	26.7186		5.65181	35.7938		13.6496	27.8996		6.65105	34.577		14.6502	46.9149		7.64991	33.0352		15.6505	31.547
0.652357	96.7316		8.65089	67.821		1.65243	41.4483		9.65148	42.519		2.65136	45.3581		10.6516	40.2136		3.65115	28.5378		11.6517	34.1625		4.65192	44.0459		12.6518	30.6434		5.65279	31.8572		13.6511	23.8944		6.65257	31.881		14.6517	37.3208		7.65081	35.4896		15.6521	41.0189
0.653885	89.8872		8.65249	68.2057		1.65381	44.4008		9.65252	45.9904		2.65241	50.2849		10.6526	42.003		3.6522	38.8955		11.6531	39.1579		4.65338	54.7018		12.6532	31.5261		5.65362	33.408		13.6521	33.6257		6.65348	30.7865		14.6535	34.1983		7.65213	38.5674		15.6532	42.4474
0.654719	85.2706		8.65423	67.8687		1.65472	49.3336		9.65356	38.5614		2.65345	38.7702		10.6538	35.6716		3.65331	40.9592		11.654	35.1914		4.65519	46.4497		12.6542	33.1366		5.65515	37.9739		13.6533	43.2705		6.65466	30.9535		14.6547	40.3359		7.65394	41.8032		15.6542	40.7683
0.65576	74.2598		8.65527	74.3463		1.65604	37.1627		9.65516	41.3201		2.65518	37.4788		10.6555	36.5663		3.65497	37.1031		11.6553	32.6773		4.65651	41.8271		12.6555	35.0632		5.65681	36.0563		13.6551	33.2976		6.65646	28.9941		14.6557	40.0496		7.6554	45.3909		15.6559	37.4252
0.657427	84.7248		8.65624	64.8267		1.65777	40.2822		9.6569	39.2593		2.65685	41.162		10.6571	31.0012		3.65664	44.5738		11.6572	26.2415		4.65741	37.5892		12.6572	29.0061		5.65799	33.1664		13.6566	35.9191		6.65799	29.862		14.6572	43.9296		7.6563	40.0496		15.6576	39.0804
0.658955	92.3625		8.65791	71.7428		1.65923	49.0085		9.65801	40.4433		2.65775	39.3875		10.658	33.6555		3.65768	47.2519		11.6586	35.6149		4.6588	39.4979		12.6587	33.4229		5.65904	28.5378		13.6575	33.9001		6.65889	37.449		14.659	47.1803		7.65755	38.6927		15.6587	35.5165
0.659996	83.9345		8.65971	57.6393		1.66013	39.7454		9.65898	41.5945		2.65866	46.7509		10.6592	33.9269		3.65872	39.5277		11.6594	28.3082		4.66067	42.1402		12.6597	39.9691		5.66049	37.0255		13.6585	30.9983		6.65986	27.3002		14.6601	39.2682		7.65935	40.3031		15.6596	28.5856
0.661038	87.9159		8.66068	67.2603		1.66138	46.7837		9.66058	38.9014		2.66025	52.7722		10.661	35.7073		3.66032	34.5741		11.6606	26.0148		4.66192	42.2595		12.6609	36.8526		5.66223	40.1212		13.6601	36.8913		6.66153	32.7668		14.6609	36.5096		7.66081	32.728		15.6613	25.7703
0.662635	94.9422		8.66152	65.6171		1.66319	54.9761		9.66238	40.2882		2.66185	42.2118		10.6625	45.7787		3.66206	38.7374		11.6622	38.0783		4.66269	35.7372		12.6627	38.3378		5.66362	27.837		13.6617	41.8032		6.66306	28.4812		14.6623	39.5516		7.66165	35.2868		15.663	29.853
0.664371	107.701		8.66304	73.55		1.66472	53.4194		9.66343	40.2554		2.66303	36.098		10.6633	32.7548		3.66317	35.7759		11.6637	34.8156		4.66394	44.708		12.6642	42.5727		5.66452	34.6427		13.6628	45.0003		6.66417	34.416		14.664	43.7865		7.66276	33.2082		15.6641	36.9778
0.665552	88.5213		8.66471	69.509		1.66555	47.738		9.66419	40.2285		2.664	40.5208		10.6644	25.2603		3.66414	35.8863		11.6647	40.6938		4.66567	39.4412		12.665	37.7741		5.66577	31.4754		13.6638	42.6502		6.66521	28.8003		14.6653	42.2327		7.66442	32.6236		15.6649	41.4125
0.666524	82.7237		8.66589	68.7783		1.66659	45.8115		9.66565	37.4788		2.66546	43.5419		10.666	30.6314		3.66574	33.0948		11.6658	38.8805		4.66699	35.3674		12.6661	34.2132		5.66758	35.3703		13.6653	33.6317		6.66674	31.723		14.6662	35.8207		7.66595	32.0033		15.6664	36.617
0.667982	107.775		8.66687	62.1904		1.66826	45.1106		9.66738	34.3295		2.6672	42.0955		10.6676	37.8397		3.66754	36.2233		11.6674	32.6027		4.66796	32.2717		12.6677	42.9276		5.66904	37.3148		13.6671	39.1102		6.66848	37.1955		14.6676	43.1512		7.66692	29.6831		15.6681	26.9035
0.669788	100.391		8.66825	69.3301		1.66979	42.7576		9.66856	39.9751		2.66852	34.9319		10.6686	35.4926		3.66859	39.14		11.6692	30.709		4.66921	41.9344		12.6693	35.591		5.67001	46.0113		13.6683	40.482		6.66966	34.3236		14.6693	37.4997		7.66803	32.1077		15.6693	31.3174
0.671038	94.8736		8.66999	60.6425		1.67083	43.9147		9.66954	39.5158		2.66942	39.1489		10.6697	32.895		3.66942	29.5369		11.6703	28.9554		4.67088	43.2646		12.6703	33.9388		5.67126	42.2237		13.6692	31.1354		6.67063	33.0083		14.6708	35.6179		7.6697	34.4428		15.6703	38.979
0.671941	97.7754		8.67138	58.6325		1.67187	48.4419		9.67093	36.7512		2.67081	45.1076		10.6713	34.6427		3.67088	35.263		11.6713	30.0767		4.67248	45.9009		12.6714	30.9177		5.67306	35.9907		13.6707	33.2469		6.67209	30.8342		14.6718	43.8759		7.67137	32.2926		15.6717	34.5293
0.673399	98.6701		8.67235	61.9846		1.67347	44.5827		9.67266	38.5435		2.67261	50.789		10.673	37.4162		3.67254	36.5513		11.6728	26.6799		4.67352	37.1896		12.673	35.7193		5.67452	32.9875		13.6724	36.8734		6.67389	34.1237		14.673	39.7991		7.67248	37.0524		15.6735	35.1675
0.675205	93.4839		8.6736	65.1339		1.6752	52.4889		9.67412	41.8539		2.674	47.9945		10.6742	31.9556		3.67379	31.9616		11.6745	30.5628		4.67463	42.3251		12.6747	32.7727		5.67535	29.3073		13.6737	25.2454		6.67514	30.87		14.6746	35.3703		7.67345	32.9905		15.6748	39.8438
0.676455	100.063		8.67534	71.3073		1.67638	48.8952		9.67509	44.368		2.67491	44.031		10.6751	35.7491		3.67477	36.107		11.6757	29.7188		4.6763	48.415		12.6758	24.7682		5.67647	32.6117		13.6746	29.1731		6.67605	32.1196		14.6762	39.5724		7.67498	34.085		15.6758	35.096
0.677288	101.909		8.67686	65.8795		1.67736	37.4908		9.67627	45.6057		2.67622	42.1521		10.6766	33.6406		3.67608	37.7502		11.6767	25.2364		4.67796	44.2398		12.6768	30.7865		5.67813	35.5821		13.676	35.8445		6.6775	39.2086		14.6773	43.7835		7.67678	38.0843		15.6771	43.3093
0.678538	92.8308		8.67784	61.7907		1.67881	50.6965		9.67801	34.6963		2.67803	38.5584		10.6784	37.8457		3.67782	44.884		11.6782	22.6448		4.67908	37.6548		12.6783	29.9097		5.67966	39.31		13.6779	32.4268		6.67931	37.9411		14.6783	49.2471		7.67796	43.6582		15.6788	41.5318
0.680205	96.2455		8.67902	67.0963		1.68055	51.8715		9.67954	32.5103		2.67942	45.8443		10.6796	38.1051		3.67928	43.7179		11.68	31.0847		4.68005	38.9432		12.68	31.1056		5.6807	35.0542		13.6792	37.9292		6.68056	39.82		14.6801	43.4912		7.67894	33.4408		15.6803	24.5952
0.681594	103.066		8.68082	73.6097		1.6818	44.2428		9.68051	33.5959		2.68018	40.1033		10.6805	34.4309		3.68025	37.956		11.6812	29.8023		4.68171	47.0521		12.6814	35.0154		5.68181	36.104		13.68	50.7293		6.68132	35.5165		14.6817	39.5873		7.68046	39.316		15.6812	31.9287
0.682566	97.6114		8.68235	67.5943		1.6827	40.1689		9.68169	36.3217		2.68136	43.1363		10.682	37.1597		3.68136	34.4011		11.6819	35.2958		4.68345	51.6151		12.6823	38.3944		5.68341	45.5908		13.6812	35.8087		6.68264	31.4903		14.6826	40.8548		7.68227	42.6591		15.6825	46.566
0.683816	95.6341		8.68318	66.5207		1.68416	47.2251		9.68342	37.8337		2.6831	47.7887		10.6838	37.9441		3.68317	28.7854		11.6833	42.7874		4.68449	45.3015		12.6836	38.8865		5.68515	35.77		13.6829	33.2111		6.68438	28.6899		14.6836	41.8837		7.68338	48.1615		15.6843	54.2574
0.685482	99.2726		8.68423	60.5173		1.68604	50.2521		9.68502	37.5445		2.68456	50.5146		10.6851	34.4965		3.68477	41.1054		11.685	47.6158		4.68533	49.596		12.6855	34.8484		5.68626	40.4164		13.6843	31.4218		6.6857	32.3403		14.6852	38.3974		7.68422	51.797		15.6857	45.546
0.68708	91.7631		8.68582	60.2847		1.68729	45.206		9.68586	43.3153		2.68553	48.3822		10.6858	37.2343		3.68574	43.017		11.6863	43.3958		4.68678	55.4473		12.6868	29.9008		5.68723	42.513		13.6853	29.9574		6.68667	30.873		14.6868	41.6869		7.6856	43.4495		15.6866	42.7516
0.688052	74.3761		8.68735	66.816		1.68805	47.4995		9.68683	41.171		2.68664	37.4848		10.6871	35.9966		3.68685	42.1044		11.6873	31.4754		4.68845	58.9665		12.6875	31.8273		5.68869	41.7108		13.6865	39.7573		6.68792	33.748		14.6879	41.5527		7.68727	31.1563		15.6876	32.8294
0.689163	94.0923		8.68839	61.5432		1.68937	48.1049		9.68849	38.3199		2.68831	34.1685		10.6888	32.4447		3.68859	38.5316		11.6885	33.2887		4.68963	45.5013		12.6889	36.3217		5.69049	44.9913		13.6882	36.1905		6.68959	36.447		14.6889	49.7929		7.68859	25.8836		15.6893	33.4646
0.69083	94.5724		8.68944	65.9928		1.69104	47.8872		9.69002	41.7943		2.68997	43.1751		10.6902	36.9808		3.69018	44.3382		11.6903	34.2848		4.6906	46.3095		12.6905	38.0544		5.69167	46.3423		13.6898	32.6177		6.69118	37.6578		14.6904	49.256		7.68956	33.7808		15.6908	37.6787
0.692496	85.8581		8.69103	68.2475		1.69236	42.7933		9.69113	34.0581		2.69102	47.2847		10.6912	38.4541		3.69108	39.9035		11.6918	26.5457		4.69206	52.8438		12.6918	41.2515		5.69265	36.2561		13.6908	34.2371		6.69223	35.4896		14.6921	53.3448		7.69081	29.2208		15.6919	34.8783
0.693538	98.8789		8.69277	68.2624		1.69333	47.0103		9.69217	29.689		2.69206	40.3777		10.6924	39.5486		3.69213	40.825		11.6928	29.2208		4.69387	41.9613		12.6928	43.184		5.69411	35.4568		13.6919	40.4164		6.69327	32.2598		14.6935	40.0556		7.69255	29.7159		15.693	40.0228
0.69451	91.7601		8.69395	69.6014		1.69458	42.8828		9.6937	39.5217		2.69366	34.929		10.6941	31.6365		3.69372	35.5702		11.6939	35.0691		4.69526	49.4857		12.6941	38.6956		5.69591	35.421		13.6935	36.3396		6.695	32.7906		14.6944	36.7243		7.69408	33.0829		15.6945	35.5552
0.696177	93.123		8.69492	84.3431		1.69631	39.7365		9.69544	39.304		2.69539	44.6275		10.6957	32.1524		3.69525	30.4674		11.6956	44.6692		4.69616	55.0984		12.6958	28.3052		5.69716	40.5715		13.6952	36.8138		6.69667	38.3139		14.6958	36.9241		7.69505	33.1097		15.6962	34.5681
0.697913	87.734		8.69638	81.8319		1.69791	42.8977		9.69662	44.6812		2.6965	49.7362		10.6967	35.3674		3.69636	41.8301		11.6972	40.485		4.69741	46.6077		12.6973	24.7175		5.69792	36.9271		13.6963	25.3617		6.69771	32.9308		14.6976	39.3667		7.69623	33.3871		15.6974	33.241
0.698885	90.2153		8.69818	67.4452		1.69888	44.9018		9.69759	40.7296		2.69741	38.979		10.6978	31.9496		3.69734	41.1054		11.6982	36.608		4.69921	43.9266		12.6984	35.4717		5.69924	36.5484		13.6973	35.4717		6.69875	27.3419		14.699	44.9496		7.6979	30.3958		15.6984	39.6052
0.699719	90.0214		8.69943	77.8804		1.69999	49.7511		9.69905	35.427		2.699	37.3118		10.6994	37.953		3.69886	38.7165		11.6993	34.2788		4.70067	53.3776		12.6995	46.1813		5.70091	37.5922		13.6989	36.1756		6.70042	32.892		14.6999	42.5995		7.69949	29.361		15.6998	35.5403
0.701246	93.3527		8.70034	80.7881		1.70166	46.1306		9.70079	33.1604		2.70081	38.4779		10.7011	28.8003		3.70067	34.3623		11.701	38.4332		4.70157	46.4944		12.7011	38.4183		5.70223	35.5046		13.7006	33.7122		6.70216	33.2171		14.7012	41.0278		7.70053	31.2339		15.7016	36.9033
0.702913	95.3747		8.7018	78.3456		1.70333	42.7188		9.70211	29.4325		2.70192	31.6126		10.7021	22.606		3.70192	32.8234		11.7026	27.2047		4.70283	45.8562		12.7028	42.3579		5.7032	30.2467		13.7017	27.3479		6.70313	36.4589		14.7031	43.7924		7.70158	36.5335		15.7029	32.6743
0.704094	113.412		8.7036	74.5163		1.7043	53.7832		9.70301	35.6924		2.70275	29.3341		10.7032	26.8618		3.70282	37.2104		11.7036	27.324		4.7047	55.841		12.7039	37.9143		5.70452	23.7751		13.7026	34.3981		6.70403	28.4603		14.7044	59.1305		7.70331	32.218		15.7038	39.7723
0.705066	105.598		8.70485	76.8485		1.70534	51.5524		9.70447	36.1607		2.70414	39.4979		10.7049	39.3875		3.70421	44.872		11.7045	32.6654		4.70616	39.48		12.7048	37.0703		5.70626	26.2593		13.704	37.8725		6.70556	27.1004		14.7052	53.4194		7.70498	33.742		15.7053	40.8906
0.706455	96.9285		8.70568	75.9806		1.70701	46.566		9.70627	34.5204		2.70581	41.6153		10.7065	36.1159		3.70602	42.6144		11.7061	39.4412		4.70692	39.1489		12.7065	36.784		5.70779	32.555		13.7057	34.7142		6.70716	27.9593		14.7064	47.9766		7.70588	33.1843		15.7071	37.1627
0.70826	95.3508		8.70693	74.4537		1.70874	36.4738		9.70752	38.4392		2.70706	38.0455		10.7075	34.8097		3.7074	37.9143		11.7077	37.458		4.70803	46.9298		12.7082	37.9411		5.70876	35.4956		13.7069	29.865		6.70834	30.873		14.7081	44.0757		7.70678	39.304		15.7084	33.7837
0.709649	84.9574		8.70867	68.3459		1.70972	40.2435		9.70829	38.9849		2.70803	33.068		10.7083	34.5532		3.70824	41.9762		11.7088	31.9407		4.7097	49.0145		12.7092	45.6206		5.70987	34.5651		13.7078	34.3742		6.70938	38.5823		14.7094	39.6202		7.70838	32.6892		15.7091	32.8055
0.710552	89.076		8.70999	60.8424		1.71062	39.5903		9.70954	35.9519		2.70935	36.1457		10.7099	35.1526		3.70963	35.7849		11.7098	37.5922		4.71123	46.3721		12.7101	40.5387		5.71161	37.7264		13.7092	40.1987		6.71084	36.3605		14.7105	45.9993		7.71005	32.7012		15.7105	33.2559
0.711802	95.6789		8.71096	62.5989		1.71215	44.7468		9.71127	30.6881		2.71109	39.8558		10.7115	40.3329		3.7115	31.8721		11.7113	34.5144		4.71227	46.2767		12.7116	38.0485		5.7132	42.173		13.711	35.9817		6.71257	36.7571		14.7116	43.4137		7.71116	32.9606		15.7121	34.1595
0.713538	99.3173		8.71221	75.3603		1.71374	50.1746		9.71266	40.2912		2.71254	47.4637		10.7127	42.0269		3.71282	36.5305		11.7131	28.2903		4.71331	42.2804		12.7132	36.1815		5.71424	39.3726		13.7124	32.8115		6.71396	51.7582		14.7133	38.4392		7.71213	34.6158		15.7135	33.1754
0.715066	109.69		8.71395	66.0346		1.71493	49.3395		9.71363	37.9351		2.71352	40.3419		10.7137	45.212		3.71358	29.531		11.7143	32.8145		4.71491	34.085		12.7144	28.9196		5.71535	34.3176		13.7133	32.3493		6.71493	36.781		14.7149	41.1769		7.71366	40.9413		15.7144	37.4729
0.715969	104.507		8.71548	80.8597		1.7159	37.1568		9.71481	37.1061		2.7147	34.8991		10.7151	37.2462		3.71477	34.753		11.7153	30.035		4.71664	30.8909		12.7154	31.9944		5.71702	36.8019		13.7146	40.3657		6.71618	31.9168		14.716	45.713		7.7154	36.101		15.7157	28.6273
0.717219	87.9159		8.71652	76.5264		1.71736	38.2185		9.71655	31.3502		2.71643	38.7165		10.7169	32.394		3.7165	34.753		11.7166	32.5878		4.71782	46.7807		12.7168	38.8597		5.71869	35.6596		13.7164	33.6287		6.71799	29.4952		14.717	40.9145		7.71664	32.4417		15.7174	33.6048
0.719024	81.0953		8.71756	71.868		1.71909	42.853		9.71815	33.8344		2.71803	43.6075		10.7182	24.8308		3.71789	37.6011		11.7184	38.5435		4.7188	48.9697		12.7186	29.1045		5.71966	34.7709		13.7179	31.8154		6.71938	30.2825		14.7187	33.8315		7.71762	28.4484		15.719	38.9104
0.720482	85.6344		8.7193	79.0942		1.72041	49.4946		9.71912	38.9402		2.719	41.3231		10.7191	36.5036		3.71886	31.0847		11.7198	33.9537		4.72026	44.4426		12.7199	26.7365		5.72056	35.1526		13.7188	34.0701		6.72035	31.4695		14.7204	36.3664		7.71901	35.8714		15.72	44.6454
0.721316	76.2043		8.72096	78.5186		1.72131	40.5924		9.72023	39.5247		2.72011	47.0133		10.7204	42.34		3.72004	37.458		11.7207	33.4766		4.72206	47.8812		12.7208	30.5599		5.72209	37.5683		13.72	30.0976		6.7216	39.1549		14.7215	45.0927		7.72081	35.5791		15.7211	40.151
0.722427	88.5869		8.722	79.9412		1.72263	40.664		9.7219	35.3375		2.72185	43.864		10.7222	38.1469		3.72171	39.3846		11.722	40.7087		4.72324	54.6421		12.7221	36.1845		5.72376	34.8216		13.7219	36.6796		6.72341	36.1815		14.7225	39.5068		7.72213	36.9301		15.7228	42.4355
0.724094	82.3539		8.72305	72.5689		1.72444	46.2618		9.72356	33.4467		2.72345	45.9516		10.7237	32.6177		3.72331	40.4164		11.7238	35.1735		4.72414	56.8729		12.7239	36.3217		5.72494	36.7005		13.7233	41.1799		6.72487	25.0455		14.7241	40.8489		7.72303	47.9856		15.7244	38.5525
0.725621	76.6338		8.72471	79.7473		1.7259	52.2294		9.72461	37.5594		2.72435	44.9675		10.7246	32.0212		3.72435	32.9398		11.7252	35.0721		4.72567	52.0892		12.7254	37.7115		5.72591	45.9725		13.7242	39.6261		6.7257	24.5296		14.7258	49.8704		7.72442	32.2389		15.7255	31.0042
0.726594	90.7759		8.72645	75.5601		1.7268	36.7571		9.72565	39.4203		2.72539	47.6694		10.7258	37.0941		3.72539	39.0386		11.726	26.999		4.72748	44.6394		12.7263	32.1942		5.72737	39.8677		13.7252	34.5174		6.72681	37.5295		14.7269	49.8972		7.72623	30.7716		15.7265	30.9326
0.727705	92.0643		8.72742	75.9269		1.72805	44.6155		9.72731	36.0563		2.72699	48.7699		10.7276	32.4268		3.72706	37.2731		11.7272	25.5824		4.72873	47.7708		12.7275	35.6775		5.7291	37.3655		13.7269	32.0898		6.72848	32.1852		14.7277	51.8686		7.72762	32.06		15.7282	27.667
0.729302	83.8391		8.72825	87.1017		1.72986	48.8504		9.72898	34.3265		2.72859	38.7076		10.7291	32.901		3.72879	37.1359		11.7289	34.8097		4.72949	41.7973		12.7293	39.0386		5.73042	36.0622		13.7284	36.3545		6.72993	38.6479		14.7292	36.7571		7.72845	33.8195		15.7299	30.5479
0.731038	75.4438		8.72978	79.3268		1.73131	55.9692		9.73002	34.2192		2.72963	43.7477		10.7299	33.6585		3.7299	41.5885		11.7303	37.6488		4.73081	34.5055		12.7308	34.8365		5.73133	28.6422		13.7294	36.7333		6.73098	28.2933		14.7308	38.8388		7.72956	35.3465		15.7309	40.6103
0.732149	78.2204		8.73145	70.6482		1.73215	41.0875		9.73085	37.7502		2.73067	36.4678		10.731	35.8356		3.73088	40.4343		11.7314	40.1122		4.73248	44.5738		12.7316	25.5138		5.73272	32.4149		13.7305	33.8166		6.73209	27.2525		14.7321	39.0088		7.7313	26.3637		15.7318	39.1847
0.733121	85.7865		8.73263	70.4872		1.73326	41.4513		9.73238	38.9819		2.7322	35.9728		10.7327	32.8264		3.73254	38.63		11.7325	39.6947		4.7338	43.9266		12.7327	23.289		5.73452	42.2804		13.7321	34.1446		6.73368	40.3747		14.733	47.4398		7.73276	32.4864		15.7333	42.7516
0.734649	96.8211		8.7336	78.3814		1.73493	40.6908		9.73405	42.9186		2.73393	44.207		10.7342	39.5844		3.73428	50.0076		11.7341	40.4075		4.73477	46.1664		12.7344	23.0235		5.73591	38.2125		13.7338	31.5082		6.73542	36.617		14.7344	47.3831		7.7338	36.9957		15.7349	35.6656
0.736455	103.403		8.73506	73.4069		1.73645	49.6825		9.73523	37.2313		2.73518	50.1328		10.7352	36.7273		3.73532	40.6043		11.7358	38.6062		4.73602	55.6263		12.7359	35.4658		5.73681	35.5284		13.735	33.9865		6.73653	25.475		14.7362	41.6392		7.73491	37.0733		15.7361	30.2139
0.737635	84.1224		8.7368	80.2543		1.73749	43.5866		9.7362	34.9976		2.73609	40.7355		10.7363	30.9744		3.73615	33.2797		11.7369	27.8042		4.73776	52.7185		12.737	29.2327		5.73813	40.9831		13.736	39.7484		6.7375	39.817		14.7376	44.708		7.73658	47.5919		15.7371	31.887
0.738538	96.3857		8.73812	75.3454		1.73861	49.3425		9.73766	33.1157		2.73747	36.5991		10.7379	31.5798		3.73761	35.934		11.7379	32.6326		4.73935	47.6337		12.7381	22.3018		5.73994	34.4011		13.7374	35.4002		6.73903	38.5883		14.7385	42.9156		7.73824	38.8418		15.7385	27.2763
0.740066	93.123		8.73909	77.9997		1.7402	42.9484		9.7394	36.4142		2.73928	40.9682		10.7396	35.4061		3.73928	38.4392		11.7394	27.6461		4.74032	43.4703		12.7397	27.9205		5.74133	32.8234		13.7392	33.5303		6.74084	32.397		14.7397	44.872		7.73935	35.9012		15.7403	34.9558
0.741871	96.2962		8.74041	75.1247		1.74187	45.4864		9.74079	36.602		2.7406	36.945		10.7408	33.7837		3.74046	35.9489		11.7412	33.4706		4.74144	47.5293		12.7414	34.5592		5.74216	35.1079		13.7405	44.4575		6.74202	27.837		14.7415	37.9262		7.74033	39.811		15.7416	33.5332
0.743052	84.1969		8.74214	69.7714		1.74298	51.1677		9.74169	33.3394		2.7415	37.7443		10.7417	35.3107		3.74143	36.0324		11.7424	33.9388		4.74317	50.1328		12.7425	29.9276		5.74327	42.0329		13.7414	38.8358		6.74292	35.2421		14.7431	41.3887		7.74192	35.3226		15.7426	35.8952
0.743816	76.4578		8.7436	76.5622		1.74395	45.9993		9.74294	37.0076		2.74289	42.5249		10.7433	31.4635		3.74282	36.4887		11.7433	38.0216		4.74477	46.1544		12.7434	32.6535		5.74494	45.045		13.7428	34.2072		6.74445	45.5192		14.744	43.7656		7.74366	35.2033		15.7439	36.7154
0.745135	86.4128		8.74457	69.1392		1.74548	48.3136		9.74467	32.0003		2.74477	39.7037		10.7451	33.1336		3.74456	30.6583		11.7449	30.9416		4.74581	42.1551		12.745	30.9833		5.74647	41.505		13.7447	26.656		6.74625	43.1453		14.7452	43.6463		7.74484	39.0028		15.7457	38.1558
0.746871	88.2648		8.74582	61.6685		1.74729	45.6564		9.7462	37.9918		2.74609	33.9269		10.7462	31.7588		3.74595	36.4499		11.7467	27.9205		4.74685	45.7071		12.7468	39.1579		5.74751	36.9271		13.746	27.6789		6.74743	36.5185		14.7469	49.7094		7.74574	46.4825		15.7471	34.2729
0.748191	85.6702		8.74763	80.5376		1.74847	44.7319		9.74711	38.5913		2.74685	31.7021		10.7471	39.9959		3.74692	44.1354		11.7478	30.9744		4.74852	47.4816		12.748	44.4933		5.74862	37.9172		13.7467	34.1625		6.7482	35.4926		14.7485	44.031		7.74734	42.7456		15.748	48.8952
0.749163	90.4658		8.74909	77.5314		1.74937	39.301		9.74836	35.3286		2.7481	39.8379		10.7487	37.0911		3.74817	42.4981		11.7486	41.9911		4.75026	46.6942		12.7489	44.2517		5.75022	42.0657		13.748	27.2793		6.74959	29.6264		14.7494	38.0932		7.74915	37.2403		15.7493	39.3607
0.750413	81.3041		8.74985	80.7911		1.7509	43.3749		9.75016	41.666		2.74977	43.7268		10.7505	37.0733		3.7499	41.5676		11.75	33.1187		4.75123	49.1696		12.7504	35.4121		5.75188	36.7482		13.7497	24.7771		6.75125	32.4984		14.7504	38.2572		7.75026	25.478		15.7511	29.3729
0.752149	82.4195		8.75096	73.0967		1.75277	36.3784		9.75169	38.8		2.75122	47.5352		10.7517	39.8021		3.75143	41.4632		11.7517	29.2387		4.75213	41.9136		12.7522	28.7556		5.75299	42.179		13.751	27.5984		6.75257	38.8358		14.752	41.2008		7.75109	34.5949		15.7526	30.369
0.753677	89.0343		8.75263	65.5515		1.75388	44.6961		9.75252	41.8479		2.7522	50.2939		10.7524	34.4876		3.7524	39.814		11.7529	28.1024		4.75366	43.9833		12.7534	34.3385		5.75404	40.4075		13.752	31.4874		6.75355	31.7886		14.7536	44.541		7.75248	40.5984		15.7534	35.1377
0.754649	101.96		8.75416	78.7154		1.75472	52.7782		9.75356	39.14		2.75331	40.1749		10.7538	40.5119		3.75358	43.1393		11.754	30.8193		4.75526	44.3919		12.7541	24.8189		5.75556	33.6317		13.7533	38.8776		6.75486	29.1373		14.7547	46.0143		7.75421	42.0537		15.7545	38.3795
0.75576	92.7532		8.7552	76.2162		1.75604	42.8083		9.75523	39.5516		2.75504	49.3873		10.7555	41.496		3.75539	45.3701		11.7553	31.1533		4.75644	46.9567		12.7555	25.0724		5.7573	31.3561		13.755	39.3309		6.7566	29.7487		14.7557	35.266		7.75547	41.5109		15.7562	39.471
0.757496	82.4374		8.75631	69.503		1.7577	53.2702		9.75676	45.4417		2.75664	42.0209		10.7568	43.0289		3.75699	31.8661		11.757	32.9905		4.75741	36.6527		12.7572	32.8503		5.75848	43.1751		13.7565	28.4305		6.75813	40.9264		14.7572	28.5408		7.75644	33.6048		15.7577	39.9452
0.759163	74.8086		8.75791	64.5822		1.75902	59.0768		9.75773	51.967		2.75768	37.8666		10.7578	38.1499		3.75782	30.2676		11.7585	29.7457		4.75887	49.0622		12.7585	41.4215		5.75945	40.0258		13.7575	33.8702		6.7591	37.8606		14.759	38.7135		7.75776	38.1409		15.7587	38.7404
0.760135	81.2772		8.75964	70.0607		1.75999	44.7647		9.75884	47.7052		2.75872	41.4453		10.759	37.628		3.75879	39.7842		11.7594	30.2974		4.7606	49.8615		12.7595	32.7519		5.76098	37.7771		13.7586	35.3972		6.76021	46.0679		14.7603	43.2317		7.75956	36.602		15.7598	35.1377
0.761177	92.8427		8.76075	63.7591		1.76131	34.0104		9.76044	41.845		2.76032	32.2598		10.7608	34.8544		3.76046	34.3802		11.7606	32.1137		4.76199	48.6268		12.7608	28.8122		5.76279	41.9016		13.7603	42.51		6.76195	37.953		14.7612	41.6481		7.76102	35.1675		15.7614	35.6358
0.762913	90.4986		8.76166	68.504		1.76305	29.7069		9.76217	35.6388		2.76206	40.1421		10.7623	31.6693		3.76199	39.7782		11.7623	29.4683		4.76289	53.8578		12.7625	28.5021		5.7639	35.3226		13.762	40.9562		6.76362	29.7487		14.7626	48.2659		7.76199	44.1384		15.7631	30.4913
0.76458	90.2332		8.76318	64.7224		1.76458	37.5594		9.76329	42.2118		2.76317	49.7153		10.7633	35.7998		3.7631	35.3942		11.7639	32.9457		4.76421	54.1441		12.764	32.0868		5.76473	39.7216		13.763	33.8702		6.76466	31.7886		14.7644	49.5483		7.76317	40.0824		15.7642	32.391
0.765552	100.155		8.76499	67.2424		1.76555	45.7458		9.76426	32.8861		2.76414	43.196		10.7644	35.0751		3.76414	41.9523		11.7649	37.4788		4.76602	45.5043		12.765	43.5896		5.76612	35.764		13.764	29.6831		6.7657	33.5422		14.7657	38.2185		7.76491	34.9469		15.7652	36.8466
0.766455	95.3061		8.76617	70.0279		1.76666	44.9048		9.76579	39.2026		2.76574	33.2231		10.7662	32.7727		3.76567	36.9629		11.766	33.8762		4.76741	34.5114		12.7661	36.7124		5.76779	32.6982		13.7658	31.5679		6.76736	37.2969		14.7666	37.5266		7.76644	34.0581		15.7667	36.2382
0.767982	96.3588		8.76714	64.7582		1.7684	49.596		9.76759	34.0044		2.76747	35.5344		10.7678	29.4027		3.7674	32.3612		11.7677	29.4773		4.76831	41.2246		12.7678	36.9569		5.7691	27.33		13.7674	30.4614		6.76903	33.7778		14.768	36.4649		7.76741	31.4605		15.7685	42.3699
0.76958	99.3113		8.76867	67.7464		1.76999	36.8705		9.76877	33.578		2.76852	41.3171		10.7687	31.5888		3.76859	32.9726		11.7693	26.996		4.76963	40.5059		12.7694	42.4623		5.77001	31.9645		13.7684	36.1994		6.77	30.6106		14.7699	44.8661		7.76859	28.6422		15.7698	49.9241
0.77076	90.7431		8.77048	71.4893		1.77097	38.4183		9.76968	34.8276		2.76942	37.1299		10.7698	38.0723		3.76956	31.89		11.7702	24.1986		4.77144	41.0308		12.7705	42.0686		5.77133	32.1315		13.7693	31.5202		6.77091	27.2584		14.7711	47.7082		7.77033	32.9487		15.7707	44.2249
0.771732	82.327		8.77166	69.7714		1.77208	38.5316		9.7712	34.3593		2.77088	37.9441		10.7715	27.4553		3.77102	41.7764		11.7713	30.4555		4.77289	41.6094		12.7715	30.8342		5.77306	35.0542		13.7708	35.6596		6.7725	31.2309		14.7719	42.5697		7.77192	37.115		15.7722	34.9319
0.773191	87.4178		8.77242	75.1366		1.77381	34.8186		9.77301	36.0384		2.77254	35.6686		10.7732	27.1421		3.77282	41.6601		11.7728	30.6732		4.77366	37.3267		12.7732	27.4374		5.77459	36.0235		13.7725	30.542		6.7741	34.7858		14.7731	39.6321		7.77283	32.057		15.774	29.5011
0.774927	97.519		8.77374	75.0323		1.77541	34.3862		9.77426	37.5206		2.77372	44.6185		10.7741	32.4924		3.77414	31.8423		11.7744	37.9172		4.77477	37.2283		12.7749	37.4043		5.77556	32.6922		13.7736	29.9157		6.77528	32.8205		14.7749	35.3196		7.7738	39.0833		15.7752	27.4314
0.776316	93.2125		8.77548	66.9084		1.77638	37.4341		9.77502	40.4075		2.7747	44.1801		10.775	31.6186		3.77504	40.2435		11.7756	42.0269		4.77651	46.4855		12.7759	41.3946		5.77674	38.2244		13.7746	32.6833		6.77625	31.7677		14.7762	38.8895		7.7754	33.4318		15.776	31.4456
0.777219	109.896		8.7768	72.6225		1.77729	43.0349		9.77634	32.898		2.77609	46.739		10.7766	41.2575		3.77643	42.3549		11.7765	43.2109		4.77796	42.2804		12.7768	42.8769		5.77848	44.0847		13.776	30.9237		6.77778	31.8452		14.7772	42.2118		7.77699	32.4715		15.7773	31.6067
0.778538	103.179		8.77777	76.8067		1.77888	52.0177		9.77808	33.8046		2.77789	45.8383		10.7783	37.9023		3.77824	44.1533		11.7781	36.9927		4.77901	40.0675		12.7784	31.9586		5.78008	39.9929		13.7778	30.8581		6.77952	35.4986		14.7784	40.7892		7.7781	35.6596		15.779	32.1017
0.780344	93.3378		8.77902	78.1577		1.78048	43.36		9.7794	37.962		2.77928	43.3451		10.7794	34.2937		3.77949	34.8812		11.7798	34.2758		4.78012	48.4717		12.78	35.7968		5.78105	36.9331		13.7792	27.4732		6.78084	39.6798		14.7801	42.2148		7.77908	35.8594		15.7803	30.1185
0.781732	79.2731		8.78075	81.5158		1.78166	39.9244		9.78037	39.1609		2.78025	39.3368		10.7803	35.8386		3.78032	33.0948		11.7811	33.0889		4.78171	47.0521		12.7811	36.5692		5.78216	34.9051		13.7801	31.0162		6.78174	37.3506		14.7817	39.3577		7.7806	38.2662		15.7812	33.8434
0.782705	94.5009		8.78228	70.9345		1.78263	44.2577		9.78155	38.4749		2.78143	37.2492		10.7818	37.2104		3.78157	37.5594		11.782	37.1747		4.78338	41.2903		12.7821	39.2474		5.7839	36.6289		13.7814	32.397		6.78313	39.6023		14.7828	43.9535		7.78241	38.8597		15.7826	32.8324
0.783955	97.9723		8.78325	65.122		1.78409	46.2469		9.78329	36.9062		2.78317	43.1542		10.7836	32.737		3.78331	36.1428		11.7834	33.3424		4.78449	39.486		12.7836	30.6702		5.78549	32.0958		13.7832	33.1634		6.78493	36.8675		14.7838	37.3387		7.78359	42.6293		15.7843	30.9744
0.78576	89.073		8.78444	66.4879		1.78583	51.5494		9.78488	42.4504		2.7847	43.0767		10.7849	38.3795		3.78463	37.5176		11.7851	31.049		4.78553	42.3728		12.7853	36.4291		5.7864	32.6833		13.7846	33.736		6.78632	33.1217		14.7854	41.1918		7.78449	31.2816		15.7858	30.3362
0.787149	72.5569		8.78617	68.9811		1.78715	45.2776		9.78586	36.9838		2.78567	38.6181		10.7858	33.2708		3.7856	42.0209		11.7865	32.9755		4.78706	44.3352		12.7866	34.2609		5.78737	32.048		13.7855	36.5394		6.78723	29.5817		14.7871	42.4534		7.78595	36.0324		15.7868	34.8663
0.787982	81.99		8.78777	68.4503		1.78805	46.8672		9.78697	39.6798		2.78685	44.4277		10.7872	32.1912		3.78685	41.5288		11.7874	29.1373		4.7888	44.0847		12.7875	26.7872		5.78897	31.4158		13.7868	31.1414		6.78848	29.0031		14.7883	50.5444		7.78776	47.5531		15.7879	37.2045
0.789094	79.4849		8.78874	69.1422		1.78944	34.6218		9.78863	42.17		2.78859	37.798		10.789	31.893		3.78852	30.6255		11.7888	25.8716		4.78998	48.594		12.7889	29.7069		5.79056	31.1683		13.7886	33.8046		6.79028	35.096		14.7892	48.8892		7.78908	40.1033		15.7896	37.7025
0.79076	76.0075		8.78978	64.0066		1.79124	41.3797		9.7903	36.611		2.79018	40.9831		10.7903	33.8792		3.79011	33.8643		11.7906	20.3752		4.79095	52.6589		12.7907	33.581		5.79167	32.9666		13.7901	31.5738		6.79174	46.4556		14.7908	40.3061		7.78991	30.1722		15.7913	40.7236
0.792288	74.74		8.79152	72.2676		1.79263	48.9369		9.79134	28.8033		2.79102	46.9418		10.7912	32.3522		3.79109	40.1093		11.7919	37.4222		4.79248	50.0493		12.7921	30.3958		5.79265	31.9019		13.7908	37.5057		6.79257	35.9728		14.7926	35.1049		7.79137	32.7131		15.7923	32.8861
0.79326	83.7048		8.79318	76.6904		1.79354	41.8002		9.79238	33.8285		2.79206	50.273		10.7926	40.5357		3.7922	43.2944		11.7927	35.8744		4.79428	48.7968		12.793	32.4864		5.79417	31.7319		13.7919	30.9177		6.79368	35.1914		14.7936	37.4043		7.79317	38.9193		15.7933	30.4764
0.794371	87.9099		8.79416	69.2555		1.79486	41.0755		9.79412	38.4809		2.79372	47.3921		10.7944	40.0496		3.79386	47.3414		11.794	31.8572		4.79546	43.0051		12.7943	28.6333		5.79598	35.2391		13.7937	32.8085		6.79535	38.6569		14.7945	40.3449		7.79449	37.7502		15.7951	27.8907
0.795969	82.7654		8.79506	66.2255		1.79666	35.1586		9.79579	33.1366		2.79525	40.2971		10.7958	43.2824		3.79553	38.6062		11.7956	35.3882		4.79623	47.2728		12.7961	31.0818		5.79723	42.2207		13.7951	32.9069		6.79681	32.7936		14.796	48.2152		7.79526	32.4149		15.7967	35.758
0.797705	84.0926		8.79659	62.9091		1.79805	29.2745		9.79669	37.5087		2.79629	44.1264		10.7966	32.6505		3.79664	40.7087		11.7971	30.4674		4.79762	42.3341		12.7975	33.0322		5.7982	38.135		13.7962	28.3679		6.79785	35.8714		14.7976	46.6883		7.79651	39.5217		15.7977	38.5793
0.798816	88.9001		8.79825	61.2897		1.79888	46.0978		9.79759	37.8576		2.79734	45.5222		10.7977	30.1513		3.79761	39.7066		11.7981	24.4521		4.79928	52.7424		12.7984	32.0928		5.79959	34.4876		13.7973	34.2341		6.79896	35.263		14.7988	41.2604		7.79817	36.7124		15.7986	39.3696
0.799788	80.9969		8.79943	66.0555		1.79999	39.7066		9.79912	39.978		2.79893	43.6433		10.7994	34.3295		3.79928	33.2559		11.7992	33.4438		4.80053	52.5634		12.7995	35.94		5.8014	36.7929		13.7989	31.6842		6.80063	30.0887		14.7998	51.4003		7.79963	32.9994		15.8002	38.9402
0.801316	76.0224		8.80041	62.4647		1.80166	42.0358		9.80079	41.839		2.8006	45.0331		10.8009	43.0737		3.80102	37.622		11.8009	41.0517		4.80151	55.7456		12.8011	33.581		5.80272	37.5594		13.8005	26.4711		6.8023	33.3275		14.8012	42.7277		7.8006	35.3853		15.8018	37.5892
0.803121	84.2625		8.80186	54.9105		1.80312	48.7968		9.8019	41.8599		2.80185	32.5342		10.8019	46.39		3.80199	35.1437		11.8025	43.8103		4.80282	53.5953		12.8026	35.5552		5.80362	30.7895		13.8017	30.7507		6.80341	34.2729		14.803	47.234		7.80178	33.1724		15.8029	38.2334
0.804302	77.1497		8.80367	67.7494		1.80416	43.5777		9.80287	38.2244		2.80275	35.263		10.803	34.586		3.80289	40.5864		11.8035	46.4467		4.80456	42.0358		12.8036	31.4784		5.80501	36.6796		13.8026	31.374		6.80438	36.3605		14.8044	53.0973		7.80345	36.2352		15.8039	37.0404
0.805205	80.4452		8.80492	63.2073		1.80527	46.387		9.80433	41.496		2.80421	43.5568		10.8046	32.6535		3.80442	40.2971		11.8046	37.2134		4.80602	36.9152		12.8048	29.1224		5.80681	39.984		13.8042	38.3139		6.80591	30.3481		14.8053	40.7952		7.80512	32.892		15.8054	34.5025
0.806733	81.9065		8.80589	77.4837		1.80694	43.5926		9.80613	41.2903		2.80595	36.8227		10.8063	34.085		3.80608	35.9459		11.8062	28.8241		4.80699	41.9911		12.8064	35.1049		5.8082	30.2318		13.806	42.8858		6.80771	34.3862		14.8065	34.6099		7.80616	38.7583		15.8071	30.363
0.808538	76.7441		8.80721	74.9816		1.80861	35.2421		9.80745	31.2249		2.80727	42.1492		10.8074	31.717		3.80727	35.6388		11.8079	33.4139		4.80817	45.6653		12.8081	35.2272		5.80897	26.6292		13.8071	38.0008		6.80889	29.7099		14.8083	42.4295		7.8072	47.8335		15.8085	32.7668
0.809719	89.2371		8.80902	59.891		1.80965	39.1251		9.80836	30.8044		2.80817	44.3531		10.8084	37.1866		3.80817	40.4015		11.809	29.2834		4.80991	49.4588		12.8091	37.2939		5.81015	28.9941		13.808	32.1077		6.8098	33.4438		14.8099	45.0092		7.8088	35.9012		15.8094	37.1597
0.810482	82.2912		8.81041	64.4838		1.81069	44.4813		9.80967	32.3761		2.80956	45.0629		10.81	42.1551		3.80963	34.4548		11.81	30.9595		4.81151	41.9822		12.8102	38.2155		5.81181	33.3036		13.8096	34.3951		6.81139	38.5734		14.8108	45.8562		7.81053	38.8448		15.8107	42.0269
0.811871	90.1437		8.81131	71.2745		1.81222	43.4793		9.81148	35.8744		2.81143	43.87		10.8117	40.3777		3.81136	37.446		11.8116	32.5103		4.81255	44.2636		12.8117	43.0379		5.81327	32.2986		13.8114	28.1651		6.8132	33.8046		14.8119	45.549		7.81165	39.9244		15.8126	37.2224
0.813538	96.6988		8.81256	66.7563		1.81395	33.6197		9.81287	29.3729		2.81268	34.9021		10.8129	40.4522		3.81275	36.951		11.8133	31.7468		4.81359	53.3448		12.8134	35.0065		5.81431	32.1315		13.8126	29.2566		6.81431	36.9927		14.8137	44.3442		7.81262	35.6954		15.814	29.6264
0.814857	82.9652		8.81444	71.698		1.81513	41.2455		9.81384	35.5284		2.81345	38.1409		10.8138	33.9746		3.81365	37.8516		11.8144	30.5181		4.81532	49.1576		12.8146	36.2561		5.81542	34.6158		13.8133	28.7198		6.81507	31.4456		14.8153	38.7105		7.81428	32.5878		15.8148	34.0104
0.81583	78.2353		8.81582	64.8118		1.81604	45.7339		9.81509	41.2873		2.8147	38.9372		10.8153	30.8969		3.8149	34.0253		11.8152	33.1754		4.81699	41.7137		12.8155	30.3123		5.81709	36.7482		13.8147	31.8661		6.81646	30.9148		14.8161	41.5139		7.81602	36.0175		15.8162	34.0194
0.81708	80.7017		8.81666	65.4232		1.81763	47.4398		9.8169	37.3238		2.81643	42.6144		10.8171	32.397		3.81671	39.0505		11.8167	36.1726		4.81789	36.4857		12.8171	26.1222		5.81876	32.3731		13.8164	32.5431		6.8182	35.4747		14.8171	38.9372		7.81713	33.1247		15.818	35.6537
0.818816	83.4692		8.81777	69.9355		1.81937	42.5995		9.81836	33.5631		2.81782	35.5046		10.8183	30.4853		3.81817	38.3706		11.8183	38.7672		4.81887	36.9152		12.8189	29.1313		5.8198	26.996		13.8177	37.0315		6.81952	38.4451		14.8188	36.5036		7.8179	34.3504		15.8194	36.2322
0.820344	90.433		8.8195	69.2495		1.82048	47.6933		9.81919	35.8356		2.81879	44.5171		10.8191	26.4532		3.81907	38.2483		11.8196	29.9992		4.82039	45.6116		12.82	35.0512		5.82084	32.0212		13.8187	38.7672		6.82042	35.3733		14.8203	36.6557		7.81935	32.8354		15.8202	39.1072
0.821316	95.6878		8.82096	63.8515		1.82131	50.8784		9.8203	34.4339		2.82004	43.2705		10.8205	37.0792		3.82032	34.4935		11.8206	33.8702		4.82206	49.8167		12.8208	31.4725		5.82244	37.2075		13.8199	36.6229		6.82174	34.753		14.8214	41.0725		7.82109	32.1166		15.8213	40.4761
0.822496	78.9987		8.82193	67.15		1.8227	50.3655		9.82197	38.976		2.82171	39.471		10.8222	44.0936		3.82213	37.4788		11.8219	36.4708		4.82317	43.9296		12.8222	26.5785		5.82417	37.5355		13.8217	34.1625		6.82348	33.9836		14.8224	42.8351		7.82227	31.884		15.823	39.4531
0.824232	76.0194		8.82305	66.0256		1.82444	54.3707		9.82343	39.7544		2.82331	54.657		10.8235	41.0815		3.82359	34.9737		11.8236	28.1054		4.82414	44.2726		12.8239	23.2472		5.82536	31.7528		13.8232	30.5748		6.825	39.9393		14.824	38.2185		7.82324	33.9687		15.8244	36.5752
0.82583	73.8811		8.82471	72.1931		1.82569	55.6024		9.82447	27.837		2.82428	52.5694		10.8244	38.8269		3.82442	42.5846		11.8251	32.2091		4.82567	46.9328		12.8252	37.3178		5.82626	36.6527		13.8242	32.385		6.82591	39.2354		14.8257	44.5082		7.8247	38.2692		15.8255	34.0074
0.826802	77.3227		8.82638	65.9153		1.82666	55.2267		9.82558	34.917		2.82539	47.2609		10.8258	30.038		3.82553	44.8899		11.826	36.6885		4.82741	44.5768		12.8261	34.076		5.82786	28.9375		13.8253	35.8893		6.82709	36.0742		14.8269	42.85		7.82651	42.9812		15.8266	36.945
0.827913	78.2114		8.82749	65.8169		1.82798	49.2531		9.82718	35.3942		2.82706	49.766		10.8275	32.9398		3.8272	38.4034		11.8272	38.1469		4.82866	49.8048		12.8275	42.1402		5.82966	30.8909		13.827	40.7236		6.82882	44.4784		14.8278	47.3563		7.8279	36.4559		15.8282	39.0088
0.829649	69.6342		8.82846	70.8749		1.82972	54.0546		9.82891	37.282		2.82872	52.3457		10.829	35.8475		3.82872	32.2986		11.829	37.3476		4.82956	50.112		12.8292	34.577		5.8307	32.8055		13.8286	34.1088		6.83042	40.5506		14.8293	37.4103		7.8288	32.7966		15.8299	39.7394
0.831246	70.8152		8.83006	64.4301		1.83118	56.9981		9.83002	37.0524		2.82977	55.7336		10.8299	37.6816		3.82977	40.1778		11.8305	33.3513		4.83095	51.788		12.8307	38.12		5.83154	42.859		13.8296	31.887		6.83146	33.578		14.8311	39.486		7.83005	41.5646		15.831	31.4605
0.832149	78.3367		8.8318	60.0849		1.83215	46.2976		9.83099	46.6405		2.83074	49.3157		10.8311	39.4263		3.83081	40.0675		11.8315	40.992		4.83276	40.4015		12.8316	35.4837		5.83299	39.0356		13.8307	33.4348		6.8325	38.0932		14.8324	37.4848		7.83185	40.6312		15.8321	36.6348
0.833052	76.1805		8.83298	68.8857		1.83333	46.6465		9.83252	39.7723		2.83241	37.1896		10.8328	39.5814		3.8324	45.0032		11.8326	45.9725		4.83414	55.1998		12.8328	39.9929		5.83466	39.0267		13.8324	41.8211		6.83424	42.8023		14.8333	36.7482		7.83338	32.8622		15.8336	31.0102
0.834649	81.6679		8.83388	74.6833		1.83506	48.3912		9.83433	43.3093		2.83414	50.0046		10.8344	40.5566		3.83414	44.8243		11.8344	32.6863		4.83505	58.4535		12.8345	40.0586		5.83591	33.4736		13.8341	41.9523		6.83591	40.9145		14.8347	43.6224		7.83428	30.5449		15.8353	36.1368
0.836316	70.6632		8.83548	67.5496		1.83659	49.2799		9.83551	45.4774		2.83518	51.3645		10.8354	46.0709		3.83525	42.6979		11.836	41.8539		4.83637	54.6809		12.8361	31.7856		5.83688	41.0368		13.8351	32.0659		6.83681	38.6927		14.8366	45.6623		7.83546	32.6475		15.8365	39.143
0.837427	83.0696		8.83728	68.7574		1.83756	50.6697		9.83641	42.5488		2.83602	51.2631		10.8365	43.19		3.83622	49.3932		11.8369	48.5105		4.83824	52.8885		12.8371	31.046		5.8382	46.1992		13.836	30.6285		6.83778	29.4504		14.8378	43.0618		7.83727	37.6697		15.8375	35.934
0.838399	98.4316		8.83839	74.3642		1.83874	49.1397		9.83794	51.1856		2.83754	48.4955		10.8383	39.3577		3.83768	46.6853		11.8378	36.6885		4.83963	51.5763		12.8382	38.6777		5.84001	34.917		13.8376	40.6848		6.83938	36.5901		14.8386	45.4923		7.8388	38.7195		15.839	44.3949
0.839857	88.9597		8.83923	73.3323		1.84048	51.2572		9.83981	51.5316		2.83914	52.7871		10.8399	44.3203		3.83949	42.2357		11.8395	33.1306		4.84039	48.3345		12.8399	33.0262		5.84147	36.3903		13.8392	42.0836		6.84098	38.4392		14.8399	51.0633		7.83963	44.9018		15.8408	45.7816
0.841663	76.8157		8.84062	64.6776		1.84208	45.2597		9.84092	43.017		2.84039	48.0929		10.8408	49.5006		3.84074	42.6293		11.841	40.3478		4.84158	51.2184		12.8416	43.0558		5.84237	47.3205		13.8403	44.9197		6.84209	45.4983		14.8416	58.6981		7.84067	39.3756		15.8419	42.3728
0.842913	68.3459		8.84235	64.0156		1.84298	45.1882		9.84176	47.8812		2.84136	45.725		10.8417	50.5444		3.84157	42.2864		11.8421	45.2746		4.84324	56.9832		12.8425	37.7204		5.84355	49.2232		13.8412	46.1604		6.84306	45.9188		14.8429	58.1225		7.84234	53.5923		15.8428	43.8252
0.843885	81.6381		8.84367	73.4606		1.84395	59.4079		9.84315	48.1913		2.84275	51.117		10.8433	41.8271		3.8431	48.9996		11.8431	46.5481		4.8447	55.5666		12.8434	43.697		5.84535	45.1136		13.8428	37.5146		6.84459	38.9312		14.8439	40.491		7.84387	57.2904		15.8441	43.9147
0.845205	86.6275		8.84457	77.0274		1.84555	52.6141		9.84481	51.8745		2.84449	59.2349		10.8449	42.0239		3.8449	57.9972		11.8447	38.8656		4.84567	54.657		12.845	40.6312		5.84688	46.6495		13.8445	41.8122		6.84632	41.2157		14.8451	41.8808		7.84491	54.83		15.8458	49.9062
0.84701	84.5995		8.84589	77.2988		1.84708	51.1975		9.84613	52.0415		2.84588	59.2588		10.846	51.0484		3.84615	49.8346		11.8464	47.6575		4.84685	61.2718		12.8466	43.5866		5.84786	48.0214		13.8458	46.736		6.84764	48.3584		14.8469	52.2473		7.84595	53.2613		15.8471	57.2964
0.848399	87.2747		8.8477	79.7831		1.84819	52.966		9.84704	54.317		2.84685	50.2939		10.847	49.9479		3.84699	51.9461		11.8476	58.4297		4.84852	60.225		12.8477	42.1313		5.84897	50.6816		13.8467	41.4722		6.84855	53.0168		14.8485	62.0502		7.84755	45.8472		15.848	62.1218
0.849302	81.0744		8.84916	77.0304		1.84923	56.3599		9.84836	52.7424		2.8481	63.8187		10.8485	56.2198		3.84831	52.3219		11.8486	60.6843		4.85012	54.9821		12.8487	52.3905		5.85077	42.2804		13.8481	36.4977		6.84993	57.9167		14.8494	67.3468		7.84928	44.7647		15.8494	56.7834
0.850621	89.9498		8.85013	64.7731		1.85076	57.0369		9.85009	55.1402		2.84991	70.7228		10.8503	53.3955		3.84997	54.2306		11.8501	66.3447		4.85123	59.4049		12.8502	65.1995		5.8523	56.3361		13.8499	60.4785		6.85174	58.2537		14.8505	67.0784		7.85046	49.8018		15.8512	59.22
0.852496	78.0891		8.85131	75.0979		1.85249	59.1067		9.85162	67.3021		2.85136	64.5315		10.8515	57.6662		3.85129	65.9958		11.8518	64.6687		4.85227	55.4623		12.8521	67.0038		5.8532	59.6017		13.8512	57.6602		6.85306	56.7864		14.8522	62.3753		7.85144	57.8481		15.8526	55.173
0.853816	87.8175		8.85305	87.0719		1.85374	61.2241		9.85252	62.8584		2.85227	68.1908		10.8524	64.0424		3.85227	66.637		11.8531	73.1981		4.8538	53.5297		12.8533	73.219		5.85424	59.7001		13.8521	57.3322		6.85396	70.0577		14.8539	73.2369		7.85289	64.8715		15.8535	59.3154
0.854649	102.07		8.85464	93.472		1.85472	60.392		9.8537	65.0653		2.85352	65.1548		10.8539	66.1449		3.85352	76.3176		11.854	68.2385		4.85553	71.03		12.8542	66.2433		5.85584	62.4618		13.8535	68.9364		6.85535	72.4675		14.8549	78.3218		7.85463	62.259		15.8547	62.8077
0.85583	99.0012		8.85562	101.426		1.85611	79.5594		9.85544	82.5238		2.85532	61.6148		10.8556	60.896		3.85525	78.5961		11.8554	70.7675		4.85671	85.9267		12.8556	62.9091		5.85737	73.1474		13.8553	77.3764		6.85723	78.4828		14.856	77.7134		7.85595	66.2225		15.8565	66.8398
0.857496	112.001		8.85673	101.116		1.85791	83.3857		9.85711	71.8949		2.85678	79.631		10.857	78.4858		3.85678	80.9402		11.8573	78.2233		4.85762	83.0249		12.8574	69.2257		5.85848	73.0788		13.8567	67.4363		6.85855	86.7617		14.8576	78.8466		7.85685	75.5422		15.8581	82.0407
0.858955	110.525		8.85846	108.282		1.85923	93.8954		9.85801	79.8964		2.85768	85.8909		10.8579	81.5248		3.85775	91.1189		11.8585	95.1033		4.85921	81.7276		12.8587	80.1499		5.85952	81.6858		13.8575	75.408		6.85938	93.7553		14.8594	83.4752		7.85824	73.8006		15.8591	80.2513
0.859927	119.898		8.86013	120.865		1.86013	95.7833		9.85912	89.9468		2.85873	77.3853		10.8593	83.4692		3.85886	89.4518		11.8593	94.9691		4.86102	87.1822		12.8596	80.3855		5.86105	94.7096		13.8587	85.1065		6.86049	94.3845		14.8603	101.828		7.86012	86.72		15.8602	79.124
0.861038	138.156		8.86103	120.22		1.86152	100.841		9.86086	106.573		2.86039	84.525		10.8611	83.4335		3.8606	90.7521		11.8606	91.095		4.86213	97.3997		12.861	86.8154		5.86279	98.9684		13.8603	88.6943		6.86216	106.648		14.8612	109.15		7.86137	95.157		15.8619	102.559
0.862705	123.051		8.862	134.202		1.86333	111.306		9.86252	109.478		2.86192	87.901		10.8624	101.163		3.8622	102.067		11.8623	101.175		4.86296	104.262		12.8628	107.021		5.86404	97.1342		13.8618	93.2274		6.86362	106.973		14.8628	112.371		7.86213	113.418		15.8635	114.503
0.864371	146.632		8.8636	124.041		1.86465	111.858		9.86343	107.832		2.86296	103.642		10.8633	112.031		3.86324	116.463		11.8637	109.448		4.86435	98.3719		12.8641	123.388		5.86494	115.052		13.8628	104.793		6.86466	115.616		14.8644	133.205		7.86338	114.825		15.8644	115.279
0.865482	156.718		8.8652	127.286		1.86541	111.724		9.86433	132.236		2.864	117.542		10.8644	113.483		3.86428	129.06		11.8647	108.369		4.86609	103.821		12.865	125.114		5.8664	130.477		13.864	112.183		6.86577	116.707		14.8656	158.642		7.86512	114.107		15.8654	111.691
0.866455	159.823		8.86631	144.222		1.86666	128.282		9.86592	142.519		2.8656	126.954		10.8661	115.977		3.86602	122.063		11.8658	122.699		4.86734	117.939		12.8661	126.782		5.8682	149.018		13.8656	120.793		6.8675	139.922		14.8665	147.75		7.86651	140.435		15.867	117.891
0.868121	159.682		8.86728	155.862		1.86833	134.837		9.86759	160.568		2.86734	134.216		10.8676	143.864		3.86768	144.329		11.8675	138.237		4.86831	146.763		12.8678	128.419		5.86952	156.336		13.8673	139.573		6.8691	142.388		14.868	151.24		7.86748	149.984		15.8686	125.964
0.869857	171.582		8.86881	174.129		1.86979	152.409		9.8687	146.405		2.86852	134.035		10.8685	161.329		3.86865	159.775		11.8691	155.057		4.86963	152.62		12.8693	138.932		5.87042	164.684		13.8683	158.069		6.87014	156.655		14.8697	157.335		7.86873	152.701		15.8697	144.174
0.870969	196.869		8.87062	199.112		1.87076	166.455		9.86967	170.753		2.86942	151.89		10.8697	166.861		3.86956	148.615		11.8701	169.19		4.87137	149.122		12.8703	161.463		5.87181	184.728		13.8694	170.198		6.87118	165.778		14.8711	183.607		7.87046	160.225		15.8707	156.139
0.871871	212.845		8.87187	209.046		1.87194	170.702		9.8712	203.442		2.87095	169.649		10.8714	187.105		3.87109	167.234		11.8713	188.247		4.87283	186.037		12.8714	172.751		5.87369	185.495		13.8709	176.112		6.87285	192.312		14.872	201.921		7.87206	195.312		15.8722	165.113
0.873469	227.181		8.87277	222.01		1.87361	181.158		9.87294	216.636		2.87268	189.061		10.873	196.672		3.87275	193.809		11.8728	202.106		4.87373	201.733		12.8732	192.261		5.87494	221.348		13.8726	181.421		6.87459	205.154		14.8733	202.834		7.87303	215.861		15.874	199.443
0.875274	253.763		8.87416	240.918		1.87527	191.388		9.87419	240.661		2.87393	209.941		10.8741	211.515		3.87386	212.684		11.8746	214.181		4.87491	207.793		12.8748	229.072		5.8757	229.263		13.8738	221.548		6.8757	242.284		14.8751	218.157		7.87415	224.199		15.8753	233.486
0.876385	281.111		8.87596	265.066		1.87631	220.993		9.87516	266.512		2.87484	218.431		10.8751	237.98		3.87484	220.781		11.8756	255.496		4.87671	231.369		12.8759	253.957		5.87695	259.683		13.8747	241.819		6.87667	265.865		14.8765	255.209		7.87581	249.963		15.8762	266.93
0.877219	305.858		8.87728	318.077		1.87729	261.568		9.87655	283.804		2.87636	221.071		10.8767	270.052		3.87629	231.342		11.8766	278.161		4.87824	249.996		12.8768	263.962		5.87869	282.029		13.8763	245.988		6.87827	277.413		14.8774	284.698		7.87748	276.989		15.8776	259.936
0.878677	320.486		8.87819	343.382		1.87888	282.155		9.87829	325.148		2.87817	244.374		10.8785	313.123		3.8781	270.866		11.8783	298.143		4.87921	293.455		12.8784	289.038		5.88008	329.472		13.8781	280.398		6.88	291.761		14.8787	316.597		7.87852	317.951		15.8794	296.168
0.880344	361.979		8.87957	366.891		1.88062	304.904		9.87967	375.042		2.87935	307.096		10.8796	351.837		3.87935	316.562		11.88	349.081		4.88039	335.413		12.8802	340.528		5.88105	366.235		13.8792	343.438		6.88105	349.987		14.8805	333.82		7.87956	335.481		15.8807	340.903
0.881594	403.857		8.88145	419.995		1.8818	376.736		9.88058	460.688		2.88011	318.897		10.8805	360.673		3.88025	333.626		11.881	405.253		4.88213	366.745		12.8813	377.816		5.88223	399.19		13.88	375.546		6.88188	398.14		14.882	396.419		7.88123	393.019		15.8816	393.789
0.882566	458.201		8.88277	497.079		1.88277	422.288		9.88197	454.849		2.8815	320.108		10.8821	383.676		3.88164	347.798		11.8819	434.697		4.88373	413.395		12.8823	423.153		5.8839	435.073		13.8815	390.499		6.88334	412.774		14.8828	449.102		7.88296	471.368		15.883	430
0.883885	507.35		8.88353	551.965		1.88437	449.353		9.88377	476.984		2.88317	372.877		10.884	492.93		3.88345	419.529		11.8833	479.483		4.88463	450.095		12.8839	478.74		5.88549	502.742		13.8831	449.588		6.88507	478.406		14.884	503.95		7.88394	544.855		15.8848	480.064
0.885621	561.887		8.88478	581.956		1.88611	502.718		9.88509	554.867		2.88449	426.478		10.885	561.697		3.88484	489.414		11.885	557.843		4.8856	497.234		12.8856	541.226		5.88654	574.088		13.8844	506.926		6.88625	574.983		14.8856	533.895		7.88484	572.224		15.8862	557.873
0.88708	631.924		8.88645	651.67		1.88715	613.971		9.88593	646.946		2.88546	484.711		10.8858	606.953		3.88574	537.51		11.8862	651.593		4.8872	556.889		12.8867	623.613		5.88758	627.487		13.8853	551.244		6.88723	632.586		14.8871	605.874		7.8863	616.348		15.8869	632.703
0.887982	736.252		8.88791	755.422		1.88798	626.607		9.8871	675.436		2.88671	523.442		10.8873	654.059		3.88706	602.137		11.8872	730.821		4.8888	639.38		12.8875	687.75		5.88924	703.661		13.8867	596.107		6.88862	731.412		14.8881	718.659		7.88803	716.891		15.8881	685.239
0.889163	815.119		8.88888	867.394		1.88944	656.892		9.88884	765.956		2.88845	580.757		10.889	733.365		3.88886	696.817		11.8886	784.628		4.88991	730.687		12.8889	755.616		5.89098	764.42		13.8885	689.48		6.89035	796.546		14.8892	795.982		7.88921	822.08		15.8898	730.117
0.890969	857.146		8.88999	899.084		1.89111	760.895		9.8903	863.192		2.89004	688.696		10.8901	847.836		3.89025	746.645		11.8903	871.939		4.89088	773.254		12.8907	838.674		5.89202	845.39		13.8899	819.679		6.89181	896.051		14.8908	871.45		7.89019	876.406		15.8912	848.187
0.892496	958.003		8.89166	983.442		1.89236	853.714		9.89127	1022.69		2.89102	759.69		10.8911	936.088		3.89108	827.908		11.8917	1013.28		4.89241	847.343		12.8918	965.097		5.89306	962.237		13.8908	920.914		6.89278	964.498		14.8925	970.743		7.89165	960.657		15.8922	961.704
0.893469	1104.26		8.89332	1132.04		1.89333	932.098		9.89238	1090.28		2.89213	806.316		10.8925	1035.04		3.8922	899.689		11.8927	1108.59		4.89421	977.835		12.8928	1027.19		5.89466	1032.61		13.892	984.044		6.89396	1008.86		14.8936	1105.26		7.89338	1084.84		15.8934	1073.01
0.894649	1196.23		8.89437	1273.66		1.89465	1031.41		9.89405	1167.78		2.89379	883.752		10.8942	1093.82		3.89386	981.241		11.894	1202.47		4.89539	1092.06		12.8942	1150.07		5.8964	1160.03		13.8937	1037		6.8957	1140.77		14.8946	1204.08		7.89477	1204.97		15.8951	1094.73
0.896385	1284.38		8.89541	1345.43		1.89645	1122.86		9.89572	1292.05		2.89546	990.734		10.8957	1273.44		3.89539	1105.03		11.8957	1315.05		4.8963	1160.25		12.896	1284.51		5.89744	1316.99		13.8953	1172.25		6.8973	1309.04		14.8961	1303.47		7.89567	1322.14		15.8967	1257.44
0.897982	1436.47		8.897	1464.45		1.89784	1252.07		9.89676	1412.43		2.8965	1136.11		10.8967	1391.46		3.89643	1148.22		11.8972	1449.97		4.89776	1197.51		12.8974	1382.72		5.89834	1394.32		13.8963	1349.01		6.89827	1460.74		14.8979	1448.07		7.89692	1419.63		15.8978	1443.05
0.898885	1588.16		8.89874	1628.21		1.89881	1369.01		9.8978	1586.68		2.89754	1217.12		10.8978	1500.47		3.89754	1270.63		11.8981	1625.18		4.89956	1312.53		12.8984	1490.68		5.8998	1492.08		13.8974	1463.69		6.89938	1493.85		14.8991	1652.26		7.89873	1511.41		15.8988	1510.17
0.899858	1646.97		8.89985	1835.41		1.89999	1435.89		9.8994	1630.44		2.89921	1275.14		10.8996	1616.25		3.89914	1414.5		11.8994	1726.16		4.90088	1523.7		12.8996	1636.35		5.90147	1630.13		13.8992	1539.49		6.90118	1586.79		14.9001	1757.81		7.90019	1697.16		15.9004	1590.4
0.901455	1780.23		8.90082	1966		1.9018	1552.56		9.90113	1787.57		2.90095	1388.59		10.9011	1840.17		3.90081	1545.36		11.9012	1816.03		4.90178	1647.26		12.9013	1766.41		5.90265	1742.67		13.9008	1718.25		6.90271	1732.09		14.9015	1825.8		7.90109	1815.18		15.9021	1730.44
0.902982	1949.48		8.90242	2081.95		1.90333	1705.13		9.90224	1950.29		2.90185	1536.48		10.9021	1974.47		3.90192	1687.59		11.9026	2042.13		4.9031	1697.25		12.9028	1970.69		5.90362	1902.05		13.9017	1899.29		6.90361	1952.42		14.9033	2047.62		7.90234	1963.41		15.9032	1924.09
0.904094	2107.94		8.90423	2266.71		1.9043	1825.38		9.90322	2136.08		2.90275	1679.41		10.9033	2046.18		3.90296	1814.94		11.9035	2247.62		4.90498	1839.28		12.9038	2108.68		5.90501	2027.65		13.9027	1954.52		6.90466	2093		14.9046	2256.52		7.90414	2133.51		15.9042	2030.89
0.905135	2234.46		8.90527	2471.6		1.90541	1922.76		9.90481	2266.48		2.90428	1768.03		10.9051	2199.65		3.90449	1889.4		11.9045	2325.69		4.9063	2036.71		12.905	2247.74		5.90681	2217.7		13.9043	2076.55		6.90625	2171.53		14.9053	2363.55		7.9056	2336.2		15.9058	2129.39
0.906663	2301.88		8.90603	2689.72		1.90722	2088.82		9.90655	2526.4		2.90595	1910.05		10.9066	2459.26		3.90622	2044.86		11.9062	2506.76		4.90706	2144.06		12.9067	2411.07		5.9082	2397.74		13.9059	2279.28		6.90778	2344.16		14.9067	2530		7.90644	2497.17		15.9076	2316.1
0.908399	2557.34		8.90749	2744.32		1.90874	2258.4		9.90766	2691.08		2.90706	2065.81		10.9075	2665.66		3.9074	2217.91		11.9077	2700.04		4.90831	2254.56		12.9083	2667.15		5.9091	2522.72		13.907	2463.38		6.90889	2554.42		14.9084	2658.57		7.90755	2537.76		15.9087	2497.43
0.909649	2851.96		8.90923	2903.4		1.90958	2416.15		9.90849	2722.4		2.9081	2171.37		10.9085	2764.57		3.90831	2371.5		11.9088	2871.34		4.91005	2378.74		12.9091	2791.33		5.91036	2635.65		13.908	2605.99		6.90993	2668.3		14.9097	2808.54		7.90921	2691.42		15.9095	2630.32
0.910552	2935.4		8.91048	3079.68		1.91062	2396.65		9.90995	2827.97		2.90956	2274.67		10.9101	2892.5		3.9099	2494.71		11.9098	2952.7		4.91144	2595.37		12.9102	2882.49		5.91209	2756.66		13.9095	2784.65		6.91146	2775.89		14.9106	2990.8		7.91074	2960.25		15.911	2729.68
0.911941	3022.35		8.91145	3276.01		1.91222	2543.52		9.91169	3070.66		2.91129	2390.11		10.9116	3099.59		3.91171	2582.36		11.9114	3097.61		4.91241	2789.23		12.9118	3019.29		5.91362	2955		13.9112	2946.51		6.9132	2963.81		14.9119	3221.55		7.91178	3167.41		15.9126	2910.87
0.913746	3157.82		8.91277	3465.95		1.91374	2736.96		9.91287	3324.6		2.91261	2568.67		10.9127	3317.24		3.91282	2847.01		11.9131	3391.12		4.91359	2901.68		12.9134	3230.3		5.91452	3085.45		13.9125	3142.95		6.91445	3271.23		14.9137	3388.72		7.91283	3271.1		15.9138	3123.67
0.915066	3407.48		8.91457	3689.21		1.91486	2961		9.91384	3454.68		2.91352	2796.97		10.9137	3415.78		3.91365	3048.31		11.9142	3614.31		4.91526	2930.53		12.9144	3469.4		5.91577	3189.63		13.9134	3361.25		6.91535	3357.93		14.9152	3578.65		7.91449	3438.94		15.9148	3268.43
0.916038	3520.08		8.91596	3863.48		1.9159	3002.63		9.91523	3635.49		2.91484	2911.15		10.9153	3490.53		3.91504	3096.35		11.9152	3730.95		4.91692	3133.18		12.9155	3664.54		5.91758	3397.04		13.9148	3462.18		6.91681	3482.59		14.9162	3775.58		7.91623	3589.71		15.9162	3409.99
0.917427	3697.44		8.91693	3979.98		1.91742	3114.51		9.91697	3853.46		2.91664	2994.19		10.917	3729.91		3.91671	3210.14		11.9167	3912		4.91796	3352.11		12.917	3833.46		5.91911	3631.27		13.9166	3632.43		6.91861	3655.72		14.9173	3903.06		7.91734	3880.84		15.9179	3597.26
0.919232	3968.61		8.91812	4084.57		1.91916	3301.89		9.91842	4058.41		2.91803	3211.1		10.9183	4040.02		3.91796	3386.87		11.9185	4132.96		4.91894	3425.23		12.9187	3949.52		5.91994	3781.9		13.9179	3972.39		6.91993	3855.94		14.919	4134.26		7.91831	4034.66		15.9193	3794.81
0.920552	4232.63		8.91992	4283.29		1.92041	3520.09		9.91933	4153.75		2.919	3413.92		10.9192	4149.45		3.91893	3554.47		11.9197	4323.05		4.9206	3605.15		12.92	4074.39		5.92098	3882.24		13.9188	4155.64		6.92084	3998.29		14.9206	4350.73		7.91977	4217.55		15.9203	3933.17
0.921316	4306.74		8.92145	4537.81		1.92131	3655.91		9.92051	4373.31		2.92025	3526.62		10.9206	4258.23		3.92025	3704.57		11.9206	4471.33		4.92227	3824.47		12.9209	4401.99		5.92265	4039.73		13.9202	4229.24		6.92223	4131.33		14.9216	4550.31		7.92158	4451.73		15.9215	4132.78
0.922566	4388.44		8.92242	4872.9		1.92277	3711.9		9.92231	4517.65		2.92199	3698.37		10.9224	4496.42		3.92199	3903.01		11.9222	4692.71		4.92338	3943.46		12.9223	4543.01		5.92417	4190.15		13.922	4409.97		6.9241	4345.99		14.9227	4653.9		7.92276	4715.9		15.9232	4300.43
0.924232	4517.59		8.9236	5059.58		1.92458	3920.69		9.92384	4668.24		2.92345	3942.64		10.9237	4647.58		3.92345	4072.5		11.924	4959.01		4.92435	4080.49		12.9241	4703.78		5.92522	4430.14		13.9233	4716.41		6.92535	4646.82		14.9244	4782.6		7.92366	4853.6		15.9248	4492.21
0.925691	4755.65		8.92541	5252.46		1.9259	4152.78		9.92481	4974.24		2.92428	4021.2		10.9246	4916.33		3.92442	4138.26		11.9251	5233.28		4.92602	4242.91		12.9255	4974.26		5.92626	4593.26		13.9241	4929.36		6.92612	4808.71		14.926	5048.9		7.92519	4980.85		15.9257	4789.62
0.926663	4991.65		8.92693	5454.02		1.9268	4339.79		9.92593	5074.45		2.92539	4175.42		10.926	5011.8		3.9256	4220.42		11.926	5386.63		4.92776	4378.5		12.9263	5280.71		5.92785	4697.92		13.9253	4957.54		6.92736	4829.68		14.927	5310.08		7.92699	5257.08		15.9269	4933.41
0.927844	5072.48		8.92784	5677.79		1.92819	4398.28		9.92773	5274.17		2.92706	4307.63		10.9278	5203.14		3.92734	4384.89		11.9272	5452.66		4.9288	4617.16		12.9277	5422.9		5.92952	4901.37		13.927	5148.85		6.9291	5022.02		14.9279	5493.27		7.92824	5474.47		15.9287	5034.58
0.92951	5244.14		8.92881	5774.61		1.92999	4568.57		9.92926	5467.62		2.92852	4460.83		10.9292	5533.49		3.92893	4674.27		11.929	5689.13		4.92963	4832.76		12.9295	5583.07		5.9307	5148		13.9285	5382.85		6.93049	5320.24		14.9295	5612.16		7.92901	5698.1		15.9303	5276.93
0.931177	5600.37		8.93048	5992.79		1.93124	4765.35		9.93016	5587.77		2.92956	4604.29		10.9299	5782.4		3.9299	4842.39		11.9303	5880.88		4.93109	4935.06		12.9308	5783.19		5.93167	5332.9		13.9294	5577.84		6.93146	5470.2		14.9311	5903.9		7.93033	5696.71		15.9312	5436.72
0.932219	5821.12		8.93207	6276.96		1.93208	4900.68		9.93113	5802.2		2.93067	4729.99		10.9312	5901.62		3.93095	4892.25		11.9313	6123.35		4.93276	5038.63		12.9316	5978.89		5.93313	5456.33		13.9306	5718.8		6.93264	5587.21		14.9322	6150.36		7.93206	5853.36		15.9321	5608.88
0.933191	5979.35		8.93312	6506.46		1.93333	5020.35		9.9328	5945.7		2.93227	4848.09		10.9329	6066.37		3.93268	5052.76		11.9325	6288.33		4.93394	5313.68		12.9328	6157.68		5.93494	5748.56		13.9323	5908.91		6.93431	5777.76		14.9332	6373.82		7.93338	6220.73		15.9337	5741.04
0.934857	6120.99		8.93416	6667.17		1.93506	5159.24		9.93433	6127.32		2.93393	5067.79		10.9343	6318.44		3.93435	5321.33		11.9342	6535.83		4.93491	5497.47		12.9346	6338.89		5.93626	6011.01		13.934	6187.61		6.93598	6154.69		14.9346	6513.86		7.93435	6363.59		15.9353	5915.22
0.936594	6326.85		8.93575	6791.51		1.93638	5308.95		9.93544	6383.68		2.93511	5336.88		10.9353	6587.33		3.93525	5516.32		11.9358	6805.61		4.9363	5567.26		12.9359	6529.67		5.93716	6144.92		13.935	6494.37		6.93702	6334.09		14.9365	6760.18		7.9356	6546.24		15.9364	6127.39
0.937705	6665.23		8.93756	7159.81		1.93736	5533.01		9.93648	6660.52		2.93602	5498.26		10.9365	6719.71		3.93615	5635.44		11.9368	7165.45		4.9381	5880.84		12.9369	6741.73		5.93855	6260.62		13.936	6664.43		6.93806	6436.25		14.9377	7011.5		7.93734	6787.33		15.9375	6351.78
0.938677	6825.58		8.93874	7511.73		1.93861	5664.84		9.93801	6848.54		2.93754	5641.62		10.9382	6763.95		3.93775	5807.21		11.9379	7169.62		4.93949	6071.12		12.9381	7016.07		5.94042	6458.34		13.9376	6838.91		6.93973	6596.95		14.9386	7180.72		7.93887	7101.27		15.939	6553.08
0.940274	6920.98		8.93964	7604.85		1.94027	5893.14		9.93974	7024.72		2.93935	5879.76		10.9397	7095.39		3.93935	5992.21		11.9396	7443.01		4.94039	6158.74		12.9398	7186.14		5.94167	6710.27		13.9393	7189.02		6.94139	6772.26		14.94	7472.07		7.93984	7241.33		15.9407	6768.83
0.94208	7238.08		8.9411	7706.88		1.94187	6107.75		9.94099	7312.84		2.94053	6165.7		10.9408	7486.55		3.94046	6181.26		11.9413	7704.99		4.94164	6390.23		12.9414	7340.72		5.94244	6783.5		13.9404	7392.78		6.94243	7052.74		14.9418	7712.41		7.94095	7377.03		15.9419	6963.17
0.943121	7391.45		8.94291	7985.87		1.94291	6382.41		9.9419	7445.6		2.9415	6245.84		10.9419	7632.73		3.94143	6368.55		11.9423	7915.8		4.94338	6630.51		12.9424	7710.65		5.94376	6925.74		13.9414	7470.2		6.94348	7172.63		14.9432	7877.57		7.94269	7611.67		15.9428	7043.14
0.943955	7593.96		8.94423	8314.12		1.94395	6423.36		9.94336	7572.87		2.94303	6222.78		10.9435	7750.28		3.94296	6539.95		11.9433	8262.73		4.94491	6682.14		12.9435	7943.68		5.94542	7234.28		13.943	7702.82		6.94514	7256.76		14.9441	8073.5		7.94435	7977.5		15.9443	7212.31
0.945413	7684.53		8.94513	8509.56		1.94562	6543.41		9.94516	7838.45		2.94477	6483.38		10.9452	8039.84		3.94477	6739.15		11.945	8319.32		4.94581	6984.87		12.9451	8095.47		5.94674	7503.32		13.9448	7828.08		6.94688	7634.23		14.9454	8301.31		7.9454	8220.6		15.9461	7499.68
0.94708	7944.3		8.94652	8521.88		1.94729	6740.57		9.94641	8121.15		2.94595	6706.15		10.9463	8284.01		3.94602	6895.54		11.9467	8598.7		4.94706	7160.56		12.9468	8275.1		5.94772	7689.69		13.9458	8152.36		6.94785	7998.96		14.9472	8476.8		7.94644	8363.6		15.9474	7796.86
0.94826	8178.9		8.94832	8836.21		1.9484	7038.23		9.94738	8431.59		2.94678	6891.44		10.9473	8464.76		3.94692	7079.45		11.9476	8805.2		4.94887	7367.39		12.9479	8610.4		5.94897	7852.86		13.9467	8422.49		6.94875	8058.1		14.9487	8794.44		7.9481	8594.54		15.9483	8000.82
0.949232	8310.25		8.94957	9120.66		1.94937	7116.88		9.94877	8525.86		2.94817	7032.7		10.9489	8620.73		3.94831	7224.57		11.9485	8939.59		4.95039	7631.55		12.9489	8805.2		5.9507	8017.52		13.9481	8649.28		6.95021	8151.08		14.9494	9112.58		7.94977	8793.83		15.9497	8126.22
0.950621	8570.94		8.95041	9514.05		1.95104	7273.49		9.95058	8826.83		2.94984	7287.22		10.9507	8892.84		3.95011	7535.96		11.9501	9145.56		4.95123	7822.75		12.9505	8896.08		5.95223	8231.5		13.9498	8828.32		6.95188	8346.3		14.9506	9169.85		7.95074	9092.65		15.9516	8312.5
0.952427	8727.64		8.95166	9603.55		1.95277	7478.6		9.9519	9119.49		2.95109	7530.01		10.9517	9245.71		3.95143	7794.65		11.9517	9440.05		4.95227	7995.94		12.9523	9080.48		5.95327	8513.59		13.951	8937.53		6.95306	8664.33		14.9523	9416.47		7.95165	9166.34		15.9528	8607.69
0.953816	9268.26		8.95332	9716.85		1.95381	7713.09		9.95273	9302.75		2.95213	7608.11		10.9526	9385.51		3.95233	7896.85		11.9528	9704.8		4.95394	8035.39		12.9533	9516.54		5.95431	8526.37		13.952	9173.52		6.95403	8942.69		14.9537	9765.36		7.95317	9224.25		15.9536	8880.47
0.954719	9324.2		8.95478	9967.15		1.95465	7964.09		9.95398	9428.88		2.95338	7830.43		10.954	9465.97		3.95372	8052.6		11.9539	9791.77		4.95546	8199		12.9541	9594.07		5.95605	8639.34		13.9534	9448.25		6.95542	8951.72		14.9548	10029.7		7.95484	9540.6		15.9548	8922.9
0.955969	9352.22		8.95575	10270.7		1.95611	7940.81		9.95565	9515.8		2.95511	7874.14		10.9557	9677.68		3.95553	8185.69		11.9553	10012.9		4.95658	8429.61		12.9556	9754.88		5.95772	8885.77		13.9551	9641.46		6.95723	9287.43		14.9559	10085		7.95602	9839.32		15.9566	9139.46
0.957774	9642.83		8.95693	10538		1.95777	8072.68		9.95711	9696.6		2.95664	8143.8		10.9569	10033.4		3.95685	8376.49		11.9571	10188.7		4.95762	8514.77		12.9573	10155.3		5.95876	9168.78		13.9565	10032.5		6.95861	9619.73		14.9575	10241.9		7.95699	10072.9		15.958	9358.41
0.959302	9942.09		8.9586	10672.3		1.95895	8352.64		9.95808	10013.6		2.95761	8338.34		10.9578	10261.4		3.95768	8670.95		11.9584	10656.7		4.95914	8684.69		12.9584	10316		5.9598	9352.21		13.9575	10205.7		6.95952	9839.88		14.9592	10516.1		7.95845	10333.2		15.9589	9576.43
0.960205	10117.9		8.9602	10820.6		1.95992	8504.04		9.95926	10302.1		2.95872	8486.05		10.9592	10460		3.95886	8781.05		11.9593	10847		4.96081	8913.19		12.9594	10483.3		5.96147	9489.48		13.9587	10302.1		6.96077	9907.31		14.9603	10727.5		7.96019	10422.7		15.9602	9660.1
0.961385	10186.8		8.96124	11098.5		1.96138	8647.43		9.96093	10398.9		2.96046	8666.5		10.961	10661.1		3.96053	8851.12		11.9606	10825.7		4.96206	9068.88		12.9609	10693.2		5.9632	9669.29		13.9605	10392.8		6.96257	10061.4		14.9613	11019.3		7.96151	10778.1		15.9619	9774.23
0.963191	10356.1		8.96235	11296.3		1.96312	8940.32		9.96259	10634.2		2.96206	8824.1		10.9624	10811		3.96199	9032.98		11.9624	11059		4.96303	9259.18		12.9626	10909.6		5.96417	9932.62		13.962	10865.9		6.96403	10236.6		14.9628	11155.9		7.96241	10875.1		15.9634	10199.9
0.964788	10763.3		8.96402	11402.2		1.96451	9048.73		9.96363	10754.9		2.9631	9001.32		10.9633	11009.2		3.96303	9237.46		11.9638	11450.7		4.96449	9468.56		12.964	11048.4		5.96501	10115.3		13.963	11126.3		6.965	10411.9		14.9646	11401.9		7.9638	11067.3		15.9644	10453.8
0.965621	10936.5		8.96568	11496.6		1.96541	9170.21		9.96467	10868.9		2.96414	9108.14		10.9646	11298.1		3.96414	9404.76		11.9648	11598.4		4.96623	9563.8		12.965	11308.5		5.96654	10128.5		13.9642	11288.5		6.96625	10596.3		14.9658	11640.7		7.9656	11337.4		15.9655	10430
0.966594	10939.8		8.96673	11941.6		1.96673	9326.82		9.96627	11108.9		2.96588	9309.82		10.9664	11427.7		3.96581	9463.84		11.966	11817.5		4.96755	9699.34		12.9662	11385.2		5.9682	10438.4		13.9659	11352.9		6.96799	10743.5		14.9667	11696.3		7.96706	11405		15.9672	10519
0.96826	11143.2		8.96777	12264.7		1.96847	9453.61		9.96801	11331.6		2.96754	9380.51		10.9678	11595.8		3.96747	9820.1		11.9678	11925.2		4.96845	9845.29		12.968	11496.3		5.96938	10587.4		13.9674	11565.3		6.96952	10953.3		14.9683	11951.9		7.9679	11604.9		15.9689	10737.9
0.969788	11388.1		8.96943	12147.7		1.96999	9660.4		9.96912	11483.8		2.96845	9493.7		10.9688	11844.7		3.96859	9934.89		11.9693	12178.5		4.96984	9945.71		12.9695	11807.5		5.97035	10642.5		13.9683	11755.3		6.97035	11141.1		14.9701	12220.6		7.96921	11784		15.97	10972.1
0.97083	11439.5		8.9711	12363.5		1.9709	9636.22		9.97009	11563.5		2.96935	9630.78		10.97	11936.8		3.96956	9936.82		11.9701	12430.9		4.97171	10132.8		12.9704	12042.8		5.97181	10808.3		13.9694	11907.6		6.97139	11180.5		14.9712	12519.1		7.97102	12080.6		15.971	11092.5
0.971871	11587.7		8.97214	12641.3		1.97215	9764.86		9.97176	11660.3		2.97095	9724.34		10.9718	12111		3.97115	10107.2		11.9712	12497.1		4.97296	10404.1		12.9716	12189.3		5.97355	10923.3		13.971	11919.4		6.97306	11373.7		14.972	12549.7		7.97248	12225.6		15.9726	11175.1
0.973468	11588.2		8.97298	12848.1		1.97395	9851.44		9.97349	11867.8		2.97254	10120.4		10.9733	12367.7		3.97289	10243.1		11.9729	12570.7		4.97373	10508.5		12.9734	12296.3		5.97487	11022.2		13.9726	12125.7		6.97459	11477.8		14.9734	12576.2		7.97324	12315		15.9744	11278.6
0.975205	11692.5		8.9745	12867.7		1.97541	9954.41		9.97454	12213.6		2.97366	10327.3		10.9742	12466.5		3.97407	10481.5		11.9744	12733.5		4.97505	10549.6		12.9749	12484.2		5.97577	11247.1		13.9736	12287.1		6.97563	11501.2		14.9751	12933.8		7.97435	12445.4		15.9754	11495.6
0.976385	11947.6		8.9761	13021		1.97624	10138.6		9.97544	12292.4		2.97463	10257.5		10.9752	12447.3		3.97497	10516.6		11.9754	12911.5		4.97671	10691		12.9757	12660.5		5.97709	11327.5		13.9746	12530.9		6.97667	11519.1		14.9764	12952.2		7.97609	12528.3		15.9762	11708.7
0.977358	12157.5		8.97735	13036.3		1.97736	10201.2		9.9769	12370.6		2.97616	10278.7		10.9769	12562.1		3.97657	10560.3		11.9765	12943.9		4.9781	10965.6		12.9768	12825.7		5.9789	11346.2		13.9762	12639.5		6.97827	11748.6		14.9773	13201.5		7.97755	12775.7		15.9777	11800.1
0.978816	12248.9		8.97832	13159.9		1.97895	10393.5		9.97856	12443		2.97789	10368.6		10.9784	12627		3.97838	10781.1		11.9781	13039.9		4.97907	11029		12.9784	12859.6		5.98036	11518.1		13.978	12853.9		6.98	11912.1		14.9786	13238.2		7.97859	12853.8		15.9794	11785.2
0.980621	12379.6		8.97971	13318.3		1.98048	10455.3		9.97974	12563.9		2.97921	10495.5		10.9794	12794.9		3.97949	10742.9		11.9799	13213.1		4.98026	11048		12.98	12882.7		5.98126	11627.3		13.9792	13029.6		6.98118	11975		14.9804	13250.4		7.9797	13009.2		15.9806	11957.1
0.981871	12483.6		8.98152	13376.1		1.98152	10599.8		9.98072	12585.9		2.98011	10650.7		10.9805	12966.9		3.98025	10736.7		11.981	13465.1		4.98199	11006.6		12.981	12956.7		5.98251	11751.9		13.9801	12946.4		6.98216	12097		14.9819	13403.2		7.9813	13006.2		15.9815	12082.8
0.982774	12493.1		8.98291	13620.5		1.98256	10733		9.98217	12695.4		2.9815	10619.5		10.9821	13051.2		3.98171	10930.5		11.9819	13579		4.98359	11067.6		12.982	13065.5		5.98438	11833.7		13.9815	13063.8		6.98361	12172.8		14.9828	13479.4		7.98296	13109		15.983	12069
0.984233	12705		8.98388	13630.7		1.98416	10776		9.98391	12951.3		2.98331	10735.6		10.9838	13186.2		3.98338	11017.7		11.9835	13489.3		4.98456	11214.8		12.9836	13255.5		5.98584	11894		13.9833	13147.4		6.98535	12232.2		14.984	13445.8		7.98408	13219.6		15.9847	12143.7
0.986038	12756.8		8.98513	13819.5		1.9859	10684.1		9.9853	12953.9		2.9847	10908.7		10.9849	13235.2		3.98463	11146.8		11.9852	13593.1		4.98567	11359.4		12.9854	13462.9		5.98661	11994.4		13.9846	13220.2		6.98667	12451.7		14.9857	13584.8		7.98512	13419		15.9861	12311.9
0.987288	12826.7		8.98687	13930.6		1.98708	10682.5		9.9862	13006.9		2.9856	11021.4		10.9859	13210.1		3.9856	11257.3		11.9864	13852.4		4.98734	11437.9		12.9866	13491.4		5.98772	11884.3		13.9855	13370.7		6.98757	12436.6		14.9873	13735.8		7.98664	13445		15.987	12362.3
0.988121	12820.4		8.98839	13966.5		1.98805	10847.8		9.98752	13043.1		2.98692	11175		10.9874	13275.3		3.98692	11293.2		11.9874	13908.6		4.98901	11529.6		12.9875	13576.2		5.98945	11942.6		13.9869	13446.4		6.98903	12484.1		14.9883	13811.2		7.98838	13454.9		15.9882	12335.1
0.989371	12841.4		8.9893	13976.2		1.98951	10965.9		9.98926	13091		2.98872	11123.9		10.9892	13384.1		3.98872	11275.1		11.9889	13903.4		4.99005	11528.7		12.989	13465.2		5.99091	12088.9		13.9887	13504.6		6.99084	12474.1		14.9894	13839.6		7.98956	13616		15.9901	12435.3
0.991107	12904.3		8.99055	14054.1		1.99131	10966.4		9.99079	13159.5		2.99011	11129.1		10.9905	13447.2		3.99018	11350.8		11.9907	13995.6		4.99102	11607.2		12.9908	13407.7		5.99195	12035.7		13.99	13587.4		6.99209	12578.1		14.9911	13883.8		7.99053	13680		15.9916	12533.4
0.992496	12953.4		8.99235	14075.4		1.99256	11052.5		9.99169	13223.3		2.99095	11280.2		10.9914	13658.6		3.99109	11386.3		11.9919	14141.8		4.99269	11544.8		12.9921	13700.5		5.99299	12149.5		13.9908	13684.2		6.99292	12725.3		14.9927	14096.7		7.99213	13645.9		15.9925	12541.6
0.993469	13056.7		8.99388	14195.3		1.99347	10946		9.99294	13201.7		2.99206	11196.7		10.9928	13645		3.99227	11358.9		11.9927	14000.5		4.99442	11669		12.993	13697		5.99466	12226		13.9921	13563.2		6.99417	12683.2		14.9936	13969		7.99387	13641.9		15.9937	12446.3
0.994649	13150.9		8.99471	14300.6		1.99499	10865.9		9.99467	13142		2.99373	11266.8		10.9946	13587.8		3.994	11422.7		11.994	14016.5		4.99546	11748.5		12.9944	13786.3		5.99633	12294.2		13.9937	13626.5		6.99591	12537.4		14.9946	13890.8		7.99505	13713.1		15.9955	12470.5
0.996385	13051.5		8.99575	14090.7		1.9968	10974.6		9.9962	13222.3		2.99518	11185.6		10.9959	13707.7		3.99553	11539.3		11.9957	14117.3		4.9963	11666.9		12.9962	13883.7		5.99744	12121.2		13.9952	13587		6.99723	12718		14.9962	13895		7.99581	13826.2		15.997	12552.9
0.997982	13144		8.99742	14088.3		1.99798	11006.9		9.99704	13325.2		2.99622	11223		10.9967	13693.5		3.9965	11683.7		11.997	14275.1		4.99783	11544.1		12.9975	13871.1		5.99841	12129.5		13.9962	13829.3		6.9982	12869.1		14.9978	13929.2		7.9972	13852.2		15.9978	12657.3
0.998955	13010.8		8.99902	14152.6		1.99881	11000.9		9.99815	13349.8		2.99734	11350.3		10.998	13578		3.99768	11604.3		11.998	14144.1		4.99942	11552.6		12.9982	13893.6		5.99994	12197.2		13.9974	13792.8		6.99945	12747.1		14.9989	14097.4		7.99887	13852.1		15.9989	12744.2
1.00007	13093.8		9.00006	14165.3		2.00006	11066.8		9.99974	13373.7		2.999	11410.2		10.9997	13623.2		3.99942	11448.6		11.9992	14169.3		5.0006	11666.6		12.9995	13830.4		6.00174	12209		13.999	13663.4		7.00111	12633.2		14.9999	14001		8.00019	13690.4		16.0005	12666.9
1.00166	13172		9.0011	14119		2.0018	11157.5		10.0013	13393		3.00067	11344.2		11.001	13753.4		4.00102	11596.2		12.001	14274.8		5.00157	11668.7		13.0013	13845.3		6.00292	12153.6		14.0006	13734.8		7.00271	12611.2		15.0015	14002.2		8.00116	13513.7		16.0021	12679.1
1.00333	13107.2		9.0027	14319.2		2.00312	11124.8		10.0024	13275.1		3.00178	11197.4		11.002	13775.6		4.00192	11604.3		12.0025	14218.5		5.00303	11710.4		13.0026	13769		6.0039	12213.1		14.0017	13746.5		7.00368	12718.6		15.0032	13923.6		8.00248	13662.3		16.0031	12565.4
1.00444	13157.6		9.00443	14378.8		2.00409	11087.7		10.0034	13359		3.00275	11223.5		11.0033	13700.7		4.00289	11631.5		12.0035	14232		5.00484	11759		13.0036	13816.4		6.00535	12348.7		14.0028	13748.2		7.0048	12762.8		15.0044	13855.9		8.00421	13764		16.0041	12581.2
1.00548	12894.1		9.00555	14228.6		2.00534	11143.4		10.005	13393		3.00435	11333.4		11.005	13756		4.00449	11537.1		12.0047	14045.3		5.00623	11770.8		13.0048	13815.6		6.00716	12246.2		14.0044	13750		7.00646	12788.6		15.0053	13925.8		8.00567	13760		16.0057	12667.2
1.00715	13071.4		9.00652	14202.7		2.00708	11150.1		10.0067	13201.4		3.00609	11271.1		11.0066	13806.6		4.00609	11406.9		12.0063	14077		5.00713	11458.3		13.0065	13874.9		6.00841	12069.2		14.0061	13723.5		7.00813	12656.6		15.0067	13957.1		8.00665	13782.2		16.0075	12764.9
1.00882	12986.7		9.00805	14042.8		2.00868	11025.3		10.0079	13182.5		3.00727	11215.2		11.0076	13647.6		4.0072	11361.5		12.008	14071.6		5.00838	11386		13.0081	13854.1		6.00917	12021.3		14.0071	13660.6		7.00924	12487.8		15.0085	13898.4		8.00783	13718.4		16.0087	12631.1
1.00986	12868.8		9.00985	14038.1		2.00958	11011.6		10.0088	13172.1		3.00817	11157.9		11.0087	13637.8		4.00824	11476.3		12.009	13961.9		5.01019	11476.1		13.0091	13700.4		6.01056	12044.7		14.0081	13557.8		7.01021	12501.8		15.0099	13726		8.00956	13625.7		16.0096	12508.1
1.01069	12768.8		9.01103	14068		2.01069	10979.6		10.0103	13114.8		3.00977	11331		11.0103	13499.1		4.00977	11434.8		12.0101	13968.6		5.01158	11391.2		13.0102	13564.8		6.01223	12066.3		14.0098	13628.2		7.01188	12658.6		15.0108	13793.8		8.01116	13580.1		16.0111	12482.6
1.01222	12770.3		9.01193	14037.7		2.01242	10798.5		10.0121	13198.1		3.0115	11126.1		11.012	13473.1		4.0115	11235		12.0118	14019		5.01255	11364.4		13.0118	13622.7		6.01348	11956.2		14.0115	13634		7.01362	12443.7		15.0121	13895.7		8.0122	13516.5		16.0129	12419.9
1.01389	12777.1		9.01339	13835		2.01409	10803.6		10.0134	13066.6		3.01261	10837.9		11.013	13336		4.01275	11280.3		12.0134	13964.5		5.0138	11348.5		13.0135	13512.8		6.01445	11975.6		14.0126	13547.3		7.01459	12290.8		15.014	13864.1		8.01324	13494.6		16.0141	12389.7
1.01507	12657		9.0152	13820.6		2.01506	10844.3		10.0143	13061.3		3.01345	10952.8		11.0141	13348.2		4.01365	11359.4		12.0144	13856.2		5.0156	11311.7		13.0146	13434.2		6.01577	11911.6		14.0134	13234.9		7.01549	12343.9		15.0153	13718.5		8.01498	13346.4		16.0151	12320.3
1.01604	12586.9		9.01645	13757.8		2.01611	10539.4		10.0157	12891.9		3.01484	10899.6		11.0158	13325.1		4.01511	11435.3		12.0153	13738.2		5.01706	11207.5		13.0156	13408.9		6.01751	11649.3		14.0149	13330.5		7.01702	12317		15.0161	13535.4		8.01665	13257.1		16.0165	12340.9
1.0175	12588		9.01721	13603.8		2.01784	10594.5		10.0175	12781.8		3.01657	10903		11.0174	13252.4		4.01685	11409.3		12.0168	13586.9		5.01789	11143.5		13.0173	13344.9		6.01897	11679.4		14.0165	13248		7.01861	12239.4		15.0174	13525.2		8.01755	13135.1		16.0183	12336.8
1.01923	12526.7		9.01853	13655.4		2.01951	10476.4		10.0188	12677		3.01782	10907.4		11.0185	13055.1		4.01817	11119.1		12.0185	13405.8		5.01901	11191.2		13.019	13152.6		6.01994	11504.9		14.0177	13053.4		7.0198	12069.2		15.019	13446.3		8.01852	13053.5		16.0196	12040.1
1.02062	12260.3		9.02027	13454		2.02048	10422.5		10.0196	12650.3		3.01872	10767.9		11.0193	13026.2		4.01907	10992.1		12.0196	13366		5.02067	10971.8		13.0199	13067.1		6.02112	11527.8		14.0187	12992.8		7.02077	11754.4		15.0205	13262.9		8.02012	12913.9		16.0203	11830.3
1.02152	12121.7		9.02159	13349.5		2.02138	10336.6		10.0209	12583.7		3.02004	10758.9		11.0208	12882.8		4.02046	10826.8		12.0206	13367		5.0222	10869.9		13.0208	12957.6		6.02286	11395.8		14.0201	12978.2		7.02223	11731.1		15.0215	13153.3		8.02171	12847.2		16.0216	11855.3
1.02277	12092		9.02256	13174.2		2.02291	10282.5		10.0226	12496.8		3.02178	10584.1		11.0225	12784.7		4.02234	10771.7		12.0221	13391.6		5.02317	10833.9		13.0223	12724.1		6.02445	11139		14.0219	12891.8		7.02396	11661.8		15.0226	13147.2		8.02283	12679.1		16.0234	11823
1.02458	11973.2		9.02381	13097.5		2.02458	10084.4		10.0239	12360.5		3.02331	10373.8		11.0237	12648.1		4.02358	10532.4		12.0238	13233.7		5.02428	10573.9		13.024	12594.4		6.02549	11095.4		14.0233	12926.1		7.02535	11736.3		15.0242	12920		8.0238	12624.1		16.0247	11555.1
1.02604	11759.4		9.02555	12866.1		2.02569	9991.25		10.0249	12091.3		3.02421	10221.3		11.0246	12617		4.02435	10497.2		12.0251	13018.9		5.02588	10595.6		13.0251	12569		6.02654	11075.2		14.0242	12601.4		7.02625	11576.7		15.0259	12832.6		8.02533	12652.9		16.0257	11370.2
1.02701	11758.1		9.02714	12671.4		2.02666	9976.39		10.0261	11943.4		3.02539	10203.2		11.0261	12477.2		4.0256	10550.1		12.026	12890.3		5.02762	10493.1		13.0261	12400.6		6.02827	10862.3		14.0255	12488.4		7.0275	11329.4		15.0269	12731.2		8.02706	12385.2		16.0269	11297.5
1.02819	11554.2		9.02812	12563.5		2.02812	9907.97		10.0279	11846		3.0272	10101.5		11.0278	12205.5		4.02734	10400.7		12.0274	12857.2		5.02873	10261.4		13.0275	12333.1		6.02994	10656.6		14.0272	12334.4		7.02931	11185.2		15.028	12479.5		8.02838	12018.1		16.0287	11225.9
1.03	11423.5		9.02923	12540.1		2.02986	9662.02		10.0295	11736.4		3.02872	9958.81		11.0292	11944.3		4.02872	10141.8		12.0292	12663.1		5.02963	10041.8		13.0293	12055.2		6.03084	10495.6		14.0287	12078		7.03077	10978.1		15.0296	12422.4		8.02928	12008.5		16.0302	11075.6
1.03152	11293.4		9.03089	12410.3		2.03124	9537.48		10.0304	11577.1		3.0297	9932.73		11.0301	11861.8		4.0297	10237		12.0306	12252.7		5.03116	10001.3		13.0307	12111.1		6.03181	10398.5		14.0296	11953		7.03167	10871.4		15.0313	12208.7		8.03067	11995.3		16.0312	10792.3
1.03236	10999.9		9.03256	12133.9		2.03215	9422.52		10.0316	11411.8		3.03081	9895.5		11.0314	11742.6		4.03088	10225.6		12.0315	12040.9		5.03296	9833.7		13.0316	11835.8		6.03334	10241.3		14.0308	11901.4		7.03299	10554.2		15.0324	11840.8		8.03248	11740.6		16.0323	10669.4
1.0334	10859.3		9.0336	11841.5		2.03347	9415.75		10.0332	11348.4		3.03261	9738.41		11.0332	11609.8		4.03254	9979.12		12.0328	11952		5.03414	9561.54		13.0329	11621.4		6.03501	10042.5		14.0326	11803.5		7.0348	10446.1		15.0334	11678.2		8.03387	11536.7		16.0339	10603.7
1.03507	10736		9.03464	11743.5		2.0352	9267.2		10.0349	11099.4		3.03421	9410.2		11.0346	11464.1		4.03421	9768.65		12.0346	11786.1		5.03505	9422.05		13.0347	11492.7		6.03612	9938.31		14.0341	11455.6		7.03625	10349.9		15.035	11601.5		8.03477	11247.7		16.0356	10304.4
1.03659	10618.8		9.03631	11561.8		2.03666	8908.72		10.0359	10796.7		3.03504	9282.89		11.0355	11148.1		4.03525	9502.82		12.036	11546.9		5.03657	9402.91		13.0361	11079.9		6.03709	9793.53		14.0349	11215.6		7.03709	10147.5		15.0367	11214		8.03609	11163.9		16.0366	10075
1.03764	10427.1		9.03804	11441.5		2.03763	8826.12		10.037	10713.9		3.03602	9198.14		11.0368	10914.9		4.03629	9330.53		12.0368	11212.2		5.03838	9308.5		13.0371	10940		6.03862	9668.27		14.036	11174.1		7.0382	9918.92		15.0378	11042.8		8.0379	10949.9		16.0377	10053.3
1.03875	10204.4		9.03902	11038.6		2.03888	8658.81		10.0387	10622		3.03761	8966.22		11.0386	10830.3		4.03789	9186.43		12.038	11056.5		5.03956	9003.8		13.0383	10855.3		6.04036	9451.87		14.0376	11034		7.03987	9744.4		15.0386	11016.6		8.03928	10769.7		16.0394	9887.52
1.04034	10062.9		9.03992	10893.3		2.04069	8469.21		10.0404	10355.7		3.03921	8749.48		11.0401	10528.6		4.03963	8992.75		12.0397	10963.6		5.04039	8833.53		13.0401	10600.8		6.0416	9181.55		14.0392	10794.3		7.04132	9524.84		15.0401	10865		8.04005	10426.8		16.041	9643.25
1.04201	9762.16		9.04145	10760.7		2.04215	8319.06		10.0414	10150.2		3.04032	8594.57		11.0409	10234.4		4.04067	8734.35		12.0411	10701.2		5.04171	8705.18		13.0416	10229.3		6.04251	8979.53		14.0402	10479.2		7.04237	9329.39		15.0417	10486.3		8.04123	10239.9		16.042	9409.03
1.04312	9492.15		9.04305	10476.1		2.04291	8061.87		10.0422	10034.3		3.04129	8415.74		11.042	10189.2		4.04164	8687.8		12.0422	10417.9		5.04338	8566.5		13.0423	10007.4		6.0439	8801.99		14.0412	10296.3		7.04348	9121.77		15.043	10393		8.0429	10068.8		16.0429	9236.04
1.04409	9342.87		9.04423	10305.7		2.04402	7983.2		10.0438	9859.61		3.04282	8303.19		11.0437	10063.2		4.04331	8598.38		12.0433	10322.7		5.0447	8138.55		13.0434	10021.8		6.0457	8575.14		14.0428	10156.1		7.04507	8985.03		15.044	10150.2		8.04435	9806.49		16.0444	9010.25
1.04562	9191.61		9.0452	10065.3		2.04569	7929.41		10.0454	9600.17		3.04463	8014.21		11.0452	9731.46		4.04504	8313.98		12.0449	10114.6		5.04567	7983.33		13.0451	9812.48		6.04709	8367.66		14.0446	9792.39		7.04674	8793.2		15.0453	9832.56		8.0454	9494.81		16.0461	8724.3
1.04743	8931.79		9.04666	9784.52		2.04722	7557.93		10.0466	9305.22		3.04588	7769.45		11.0462	9546.15		4.04608	7934.06		12.0465	9868.34		5.04692	7932.92		13.0466	9501.95		6.04799	8108.93		14.0458	9469.75		7.04785	8472.76		15.0471	9677.72		8.04651	9412.12		16.0473	8579.38
1.04861	8727.86		9.04839	9562.32		2.04819	7347.95		10.0476	9118.33		3.04678	7660.27		11.0473	9222.23		4.04692	7888.65		12.0476	9599.03		5.04866	7788.77		13.0476	9150.8		6.04931	7925.22		14.0467	9295.54		7.04882	8286.07		15.0485	9299.48		8.04817	9230.76		16.0482	8486.75
1.04951	8536.5		9.04978	9252.52		2.0493	7182.85		10.0491	8849.79		3.04817	7487.17		11.049	8906.3		4.04838	7781.46		12.0487	9423.42		5.05019	7525.7		13.0487	8995.3		6.05112	7799.93		14.0482	9246.24		7.05035	8115.11		15.0494	9005.99		8.04984	8938.81		16.0496	8283.24
1.05104	8337.33		9.05068	8987.24		2.05097	7018.84		10.0509	8630.71		3.04997	7324.91		11.0506	8635.84		4.05004	7408.73		12.0502	9140.99		5.05116	7298.35		13.0504	8884.37		6.05251	7480.98		14.05	8948.43		7.05216	7978.42		15.0506	8860.64		8.05095	8613.24		16.0514	7983.58
1.05291	8064.01		9.052	8823.38		2.05263	6843.65		10.0522	8441		3.05129	7051.29		11.0517	8457.89		4.05122	7244.87		12.052	8956.59		5.05227	7174.77		13.0521	8521.84		6.05334	7145.05		14.0512	8650.93		7.05334	7670.11		15.0524	8644.56		8.05192	8454.34		16.0528	7759.31
1.05409	7727.74		9.05381	8575.05		2.05374	6654.02		10.0531	8236.31		3.0522	6839.95		11.0527	8367.03		4.0522	7221.85		12.0532	8636.74		5.05401	7034.35		13.0532	8276.71		6.05445	7115.54		14.0521	8305.35		7.05431	7400.58		15.0539	8411.55		8.05352	8235.04		16.0537	7489.86
1.05486	7578.17		9.0552	8329.79		2.05472	6525.42		10.0544	7970.49		3.05359	6817.19		11.0542	8162.29		4.05359	7035.78		12.0541	8377.89		5.0556	6798.09		13.0541	8012.4		6.05612	7041.16		14.0536	8134.55		7.05584	7378.09		15.0549	8096.57		8.05526	8026.64		16.055	7323.02
1.05625	7445.2		9.05617	8045.48		2.05624	6339.28		10.0562	7702.56		3.05546	6673.98		11.056	7866.32		4.05532	6745.84		12.0557	8166.55		5.05664	6556.05		13.0557	7971.2		6.05758	6806.9		14.0554	8023.89		7.05764	7078.26		15.056	7875.23		8.05644	7873.65		16.0568	7204.39
1.05791	7309.1		9.05742	7920.36		2.05805	6242.71		10.0577	7434.29		3.05678	6405.16		11.0572	7588.44		4.05671	6451.33		12.0574	7850.72		5.05769	6350.08		13.0575	7755.11		6.05862	6557.68		14.0566	7654.6		7.05882	6686.48		15.0578	7735.16		8.05734	7514.55		16.0582	6926.89
1.0593	7111.8		9.05923	7659.02		2.05923	5961.52		10.0586	7242.65		3.05754	6156.6		11.0581	7407.52		4.05768	6259.26		12.0585	7575.25		5.05942	6178.03		13.0586	7467.34		6.05973	6471.94		14.0574	7524.27		7.05959	6562.79		15.0594	7473.8		8.05894	7275.86		16.0591	6716.36
1.06027	6815.63		9.06068	7429.48		2.0602	5729.35		10.0598	7104.84		3.05879	6099.62		11.0596	7209.6		4.05893	6288.2		12.0594	7500.6		5.06109	5924.88		13.0596	7183.65		6.06133	6273.81		14.0587	7430.01		7.06098	6570.5		15.0603	7245.21		8.06074	7177.14		16.0603	6499.03
1.06152	6577.12		9.06152	7150.43		2.06173	5659.51		10.0616	6913.75		3.06046	5946.42		11.0615	7024.52		4.06067	6114.71		12.0608	7411.72		5.06199	5806.13		13.0611	7070.87		6.06299	6019.25		14.0604	7279.21		7.06264	6282.99		15.0612	7158.95		8.06178	6898.93		16.0622	6272.76
1.06326	6416.31		9.06263	6997.44		2.06354	5506.95		10.0631	6519.02		3.06192	5706.07		11.0627	6716.67		4.0622	5823.9		12.0625	7198.25		5.06296	5627.75		13.063	6754		6.0641	5829.58		14.0618	6969.25		7.06396	6058.15		15.0629	7003.68		8.06262	6672.69		16.0637	6027.91
1.06479	6216.43		9.0643	6813.01		2.06472	5182.59		10.0639	6422.7		3.06282	5420.91		11.0635	6430.79		4.06317	5555.18		12.0638	6829.4		5.06449	5468.31		13.0641	6383.71		6.06515	5669.45		14.0628	6656.19		7.06487	5929.5		15.0644	6700.32		8.06401	6473.12		16.0645	5906.22
1.06576	5985.78		9.06575	6666.88		2.06548	5044.37		10.065	6318.27		3.064	5268.94		11.0649	6358.1		4.06428	5435.22		12.0647	6670.28		5.06609	5330.14		13.0649	6242.19		6.06667	5507.12		14.064	6505.61		7.06618	5723.17		15.0655	6349.04		8.06574	6336.71		16.0656	5749.72
1.06687	5788.94		9.0668	6383.8		2.06687	4915.2		10.0667	6154.15		3.06574	5222.44		11.0665	6262.09		4.06608	5291.4		12.066	6581.21		5.06727	5121.15		13.0663	6182.28		6.06841	5261.54		14.0657	6345.69		7.06792	5494.66		15.0666	6151.94		8.06699	6238.14		16.0673	5626.15
1.06861	5572.62		9.06791	6098.29		2.06854	4807.45		10.0682	5869.15		3.06734	4987.06		11.0678	6061.88		4.06768	5041		12.0678	6319.62		5.06831	4873.11		13.068	6037.43		6.06959	5040.8		14.0673	6117.87		7.06945	5346.76		15.0681	6141.67		8.06796	6078.56		16.0688	5404.81
1.07027	5413.39		9.0695	6022.42		2.06986	4539.21		10.0693	5592.79		3.06838	4764.88		11.0689	5826.22		4.06852	4868.22		12.0693	5987.45		5.06977	4763.85		13.0693	5817.44		6.07056	4979.68		14.0683	5841.04		7.07042	5129.94		15.0699	5835.77		8.06928	5798.18		16.0698	5252.95
1.07125	5222.6		9.07124	5878.74		2.07083	4373.81		10.0703	5421.46		3.06942	4580.01		11.0701	5649.85		4.06949	4781.42		12.0702	5621.73		5.07151	4567.93		13.0702	5556.23		6.07209	4884.69		14.0694	5685.11		7.07153	4948.87		15.0711	5561.64		8.07109	5577.94		16.0709	5007.57
1.07229	5017.28		9.07235	5529.44		2.07215	4310.82		10.0719	5420.83		3.07109	4562.69		11.0719	5502.78		4.07115	4675.75		12.0714	5403.12		5.07282	4363.65		13.0715	5345.08		6.0739	4528.2		14.0711	5510.36		7.07327	4824.54		15.072	5382.44		8.07248	5303.66		16.0725	4848.57
1.07402	4798.14		9.07332	5322.64		2.07388	4195.36		10.0736	5179.01		3.07275	4436.23		11.0734	5238.83		4.07268	4453.81		12.0731	5368.99		5.07373	4186.34		13.0732	5213.37		6.07501	4332.4		14.0727	5316.14		7.07486	4561.21		15.0735	5267.88		8.07345	5116.33		16.0741	4685.23
1.07576	4622.48		9.07485	5221.26		2.07534	3994.36		10.0747	4854.63		3.07386	4133.43		11.0744	4986.38		4.07379	4326.78		12.0747	5225.41		5.07505	4125.04		13.0748	4943.86		6.07584	4168.83		14.0737	5067.8		7.07591	4345.09		15.0752	5034.47		8.07463	4986.27		16.0753	4501.57
1.07673	4444.93		9.07666	5022.17		2.07631	3827.08		10.0757	4669.06		3.07484	3975.65		11.0755	4845.27		4.07483	4157.69		12.0757	4962.2		5.07685	3976.36		13.0757	4711.85		6.07723	4137.49		14.0748	4814.79		7.07695	4286.95		15.0765	4759.65		8.07644	4853.92		16.0763	4344.72
1.07764	4305.32		9.07784	4676.57		2.07749	3694.36		10.0772	4585		3.07643	3890.45		11.0773	4787.15		4.07636	4002.42		12.0768	4816.88		5.07831	3730.15		13.0768	4658.72		6.0789	4008.23		14.0765	4690.81		7.07868	4153.12		15.0774	4619.71		8.07796	4534.78		16.0778	4196.27
1.07916	4226.06		9.07881	4510.18		2.07923	3529.7		10.0791	4395.64		3.07824	3676.43		11.0789	4480.91		4.0781	3802.1		12.0785	4585.77		5.07921	3588.58		13.0786	4557.42		6.08022	3764.52		14.0782	4551.58		7.08035	3874.88		15.0788	4492.3		8.07894	4262.46		16.0796	3961.87
1.08076	4052.15		9.08027	4363.32		2.08083	3302.66		10.0802	4140.56		3.07928	3495.88		11.0799	4213.62		4.07928	3580.71		12.0802	4310.11		5.08046	3471.2		13.0802	4259.16		6.08112	3634.23		14.0792	4287.64		7.08132	3657.13		15.0807	4304.46		8.08005	4199.39		16.0808	3703.12
1.08194	3838.4		9.08207	4165.44		2.0818	3183.47		10.0811	3924.16		3.08011	3383.57		11.081	4046.04		4.08025	3432.87		12.081	4059.3		5.08227	3313.29		13.0812	4005.92		6.08244	3464.5		14.08	4182.28		7.08223	3484.79		15.082	3981.13		8.08185	4062.01		16.0817	3568.3
1.08291	3606.02		9.08325	3949.64		2.08291	3073.34		10.0827	3883.24		3.08157	3240.67		11.0827	3879.27		4.08171	3387.25		12.082	3960.27		5.08373	3071.53		13.0823	3854.1		6.08424	3304.18		14.0815	4014.67		7.08382	3374.15		15.0828	3839.29		8.08345	3761.02		16.0832	3514.73
1.08444	3489.57		9.08402	3843.08		2.08465	2947.96		10.0845	3676.22		3.08324	3044.04		11.0844	3654.95		4.08352	3269.04		12.0836	3917.74		5.08456	2899.35		13.084	3720.28		6.0857	3034.81		14.0832	3820.17		7.08542	3255.18		15.084	3787.13		8.08435	3491.64		16.0851	3291.96
1.08618	3364.13		9.08541	3745.67		2.08624	2794.96		10.0856	3374.49		3.08442	2972.59		11.0853	3404		4.08484	3007.41		12.0853	3686.16		5.08567	2852.32		13.0857	3492.67		6.08661	2911.41		14.0843	3636.21		7.08653	3038.04		15.0857	3548.96		8.08533	3350.7		16.0862	3021.49
1.0875	3094.7		9.08707	3502.77		2.08722	2590.57		10.0864	3225.58		3.08539	2835.23		11.0862	3315.57		4.08574	2888.96		12.0863	3403.98		5.08734	2743.36		13.0866	3271.22		6.08779	2823.96		14.0853	3425.04		7.08757	2879.57		15.0871	3268.37		8.08692	3257.08		16.087	2896.46
1.0884	2923.59		9.08839	3268.74		2.08812	2537.29		10.0878	3163.44		3.08678	2620.85		11.0878	3170.53		4.08713	2766.73		12.0874	3253.93		5.08887	2554.7		13.0875	3176.49		6.08952	2624.44		14.0868	3317.8		7.08903	2772.47		15.0881	3080.25		8.08845	3104.45		16.0884	2827.07
1.08972	2812.43		9.08937	3114.86		2.08965	2401.5		10.0895	2918.1		3.08859	2510.64		11.0894	2984.74		4.08893	2598.93		12.0889	3105.3		5.08991	2401.92		13.0891	3041.5		6.09112	2374.11		14.0885	3106.74		7.09077	2567.08		15.0893	2957.52		8.08956	2937.06		16.0901	2677.76
1.09152	2679.8		9.09068	2906.13		2.09131	2146.94		10.0908	2714.45		3.08997	2331.02		11.0905	2823.07		4.09018	2445.5		12.0906	2923.89		5.09102	2307.24		13.0907	2838.02		6.09209	2203.88		14.0899	2843.47		7.09202	2332.7		15.091	2777.41		8.0906	2793.82		16.0914	2521.09
1.09291	2448.51		9.09242	2758.52		2.09243	2052.2		10.0918	2575.18		3.09095	2174.21		11.0915	2662.58		4.09102	2274.77		12.0919	2714.27		5.09262	2183.23		13.0918	2645.2		6.0932	2077.21		14.0908	2631.46		7.09299	2179.14		15.0926	2588.42		8.09213	2664.52		16.0923	2321.94
1.09389	2305.67		9.09388	2501.77		2.0934	1969.36		10.0931	2493.06		3.09213	2076.69		11.093	2479.94		4.09227	2197.68		12.0928	2485		5.09428	1985.7		13.0928	2458.91		6.09494	2008.8		14.0921	2552.66		7.09431	2056.48		15.0936	2346.82		8.09387	2392.41		16.0936	2159.27
1.09514	2160.16		9.09485	2334.62		2.09492	1845.72		10.0948	2334.1		3.09393	1974		11.0949	2315.61		4.09393	2019.86		12.0942	2376.23		5.09539	1825.75		13.0943	2319.65		6.0966	1851.59		14.0939	2446.63		7.09612	1959.34		15.0946	2226.84		8.09512	2170.35		16.0953	2000
1.09694	2063.53		9.09603	2233.09		2.09673	1684.55		10.0963	2120.71		3.09546	1799.83		11.0961	2099.13		4.09539	1795.91		12.096	2212.24		5.09637	1711.91		13.0961	2145.64		6.09751	1674.46		14.0953	2183.02		7.09757	1770.74		15.0963	2152.09		8.09602	2052.09		16.0969	1855.76
1.0984	1828.72		9.09777	2051.42		2.09798	1503.65		10.0973	1944.47		3.09636	1613.02		11.097	1966.29		4.09636	1680.87		12.0973	2003.97		5.09789	1649.31		13.0973	1963.79		6.09848	1569.06		14.0962	1982.1		7.09848	1606.03		15.098	1941.07		8.09748	1932.59		16.0978	1739.64
1.09923	1637.13		9.09937	1861.83		2.09888	1397.56		10.0984	1783.44		3.09754	1542.07		11.0984	1840.48		4.09754	1613.37		12.0983	1842.85		5.09963	1456.13		13.0982	1776.37		6.10008	1493.64		14.0975	1898.69		7.0998	1538.66		15.0991	1738.98		8.09928	1806.64		16.0989	1619.59
1.10034	1594.18		9.10041	1683.25		2.10027	1364.87		10.1002	1717.71		3.09935	1458.69		11.1002	1679.28		4.09921	1543.39		12.0997	1776.59		5.10081	1293.98		13.0996	1670.68		6.10167	1317.68		14.0993	1784.88		7.1016	1422.43		15.1001	1626.56		8.1006	1649.05		16.1007	1517.41
1.10201	1452.15		9.10145	1581.94		2.10208	1244.2		10.1018	1508.7		3.10095	1322.48		11.1015	1513.83		4.10081	1391.93		12.1015	1683.18		5.10178	1207.28		13.1014	1501.81		6.10279	1229.26		14.1008	1634.29		7.10299	1230.78		15.1017	1489.41		8.10151	1521.24		16.1023	1336.24
1.10354	1332.55		9.10318	1480.51		2.10347	1110.44		10.1028	1376.1		3.10178	1156.31		11.1024	1367.54		4.10185	1244		12.1028	1429.74		5.10331	1131.7		13.1028	1339.13		6.10376	1138.99		14.1016	1464.77		7.10382	1085.33		15.1035	1347.16		8.10289	1387.76		16.1032	1203.8
1.10451	1203.04		9.10485	1292.11		2.10437	991.455		10.1039	1311.55		3.10275	1102.51		11.1038	1314.57		4.10289	1134.68		12.1036	1278.63		5.10512	1002.16		13.1037	1252.87		6.10529	1055.13		14.1027	1382.26		7.10493	1059.15		15.1045	1190.81		8.1047	1252.97		16.1043	1131.82
1.10562	1140.48		9.10575	1166.78		2.10569	951.734		10.1056	1236.16		3.10442	1014.51		11.1056	1180.17		4.10456	1120.2		12.1048	1225.08		5.10623	861.071		13.105	1170.42		6.10702	925.713		14.1044	1278.42		7.1066	969.222		15.1053	1138.56		8.10602	1116.72		16.106	1044.32
1.10729	1067.69		9.10673	1116.86		2.10749	864.817		10.1073	1060.06		3.10595	923.258		11.107	1030.06		4.10622	990.859		12.1065	1133.53		5.10706	829.643		13.1068	1030.74		6.10827	800.056		14.1059	1124.24		7.10806	852.565		15.1068	1098.16		8.10678	1031.85		16.1077	922.164
1.10895	950.424		9.10825	1015.84		2.10888	743.708		10.1082	900.646		3.10699	829.286		11.1078	925.227		4.10734	860.513		12.1079	953.162		5.10845	758.479		13.1083	875.04		6.10917	729.965		14.1069	1002.57		7.1091	754.235		15.1085	941.486		8.10803	955.131		16.1087	815.522
1.11007	803.086		9.10992	885.523		2.10972	701.001		10.1092	820.204		3.10803	747.191		11.109	885.091		4.10831	784.81		12.109	863.022		5.11012	655.222		13.1091	811.242		6.11056	692.507		14.108	909.352		7.11021	665.968		15.1096	817.288		8.10977	886.8		16.1096	741.382
1.11104	735.011		9.11103	791.031		2.11083	646.007		10.1107	787.095		3.10963	723.243		11.1106	798.806		4.10997	684.073		12.1101	836.425		5.11144	612.495		13.1102	768.804		6.11237	618.194		14.1096	837.833		7.11188	624.305		15.1106	753.618		8.11116	798.585		16.1112	678.103
1.11257	714.481		9.112	739.691		2.11256	564.819		10.1124	719.133		3.11136	616.026		11.1121	681.774		4.11171	609.33		12.1117	740.048		5.11241	565.866		13.1119	689.489		6.11369	517.424		14.1113	736.085		7.11355	547.951		15.1121	670.972		8.11213	717.123		16.1128	616.574
1.11437	612.307		9.11346	678.938		2.11402	504.227		10.1136	604.979		3.11254	515.238		11.1132	580.754		4.11268	558.893		12.1134	664.819		5.11366	499.166		13.1134	579.018		6.11459	484.162		14.1124	637.949		7.11459	477.288		15.1138	599.414		8.11331	650.349		16.1139	527.114
1.11555	519.052		9.11527	579.516		2.11499	431.84		10.1145	580.253		3.11352	488.546		11.1143	581.827		4.11352	490.926		12.1144	572.931		5.11539	441.742		13.1143	525.288		6.11598	413.723		14.1134	566.283		7.11563	446.084		15.1152	528.205		8.11498	605.125		16.1149	490.783
1.11645	459.692		9.11659	492.903		2.11617	403.663		10.116	529.258		3.11497	433.806		11.1159	535.109		4.11504	478.43		12.1155	531.584		5.11692	378.782		13.1155	468.228		6.11786	361.797		14.1149	530.63		7.11716	402.509		15.1161	464.846		8.11658	525.479		16.1164	444.739
1.11798	435.321		9.11749	441.163		2.11784	376.831		10.1177	462.83		3.11671	412.076		11.1176	451.109		4.11671	410.514		12.1171	477.825		5.11789	330.781		13.1171	430.901		6.11917	324.653		14.1167	478.036		7.11889	363.247		15.1174	457.381		8.11762	483.98		16.1182	393.89
1.11979	408.951		9.11888	409.92		2.11944	338.246		10.1191	386.023		3.11803	324.56		11.1187	412.285		4.11789	357.226		12.1188	425.515		5.11907	314.903		13.1188	369.447		6.11994	288.528		14.1179	411.098		7.12007	328.536		15.1192	391.865		8.11866	443.096		16.1195	338.333
1.1209	357.324		9.12068	368.994		2.12055	290.195		10.12	344.539		3.11893	304.119		11.1196	353.969		4.11886	318.491		12.1199	372.498		5.12081	297.275		13.1199	342.937		6.12112	280.276		14.1188	381.323		7.12105	294.838		15.1206	335.64		8.12033	415.876		16.1203	288.898
1.12173	328.243		9.12207	315.574		2.12152	245.371		10.1213	312.664		3.12039	295.65		11.1212	336.036		4.12032	294.367		12.1209	338.225		5.12241	233.981		13.1209	293.699		6.12279	251.836		14.1203	341.756		7.12257	277.44		15.1216	283.491		8.12199	400.797		16.1217	268.639
1.12312	287.854		9.12298	279.852		2.12312	237.566		10.1231	267.929		3.1222	260.646		11.123	306.067		4.12206	271.272		12.1225	312.792		5.12338	218.076		13.1225	262.179		6.12424	205.524		14.1221	303.046		7.12438	245.833		15.1228	252.23		8.1231	343.173		16.1235	240.432
1.12479	260.849		9.1243	250.691		2.12486	209.12		10.1245	226.746		3.12345	226.111		11.1242	254.619		4.12345	235.272		12.1242	250.509		5.12442	214.644		13.1242	241.341		6.12529	185.503		14.1233	280.219		7.12549	199.589		15.1246	239.597		8.12415	309.103		16.1249	209.287
1.12611	220.382		9.1261	231.345		2.12604	178.453		10.1254	210.054		3.12428	204.477		11.1251	221.706		4.12435	216.889		12.1253	224.077		5.12616	191.811		13.1254	211.697		6.1264	177.836		14.1241	248.785		7.12632	172.498		15.1261	205.079		8.12574	296.112		16.1258	194.352
1.12708	219.38		9.12749	205.473		2.12694	164.12		10.1268	206.404		3.12553	199.592		11.1267	192.968		4.12567	200.639		12.1262	215.377		5.12782	161.209		13.1263	189.601		6.12813	160.905		14.1255	221.792		7.12771	163.24		15.1269	187.171		8.12748	249.307		16.1271	194.251
1.1284	203.666		9.12832	193.174		2.12854	157.371		10.1286	184.603		3.12727	172.635		11.1284	159.477		4.1274	198.336		12.1276	191.277		5.12873	154.243		13.1279	186.661		6.1298	139.474		14.1271	194.594		7.12945	170.917		15.128	186.073		8.12852	234.023		16.1289	173.124
1.13014	172.411		9.12943	183.061		2.13034	135.347		10.13	163.279		3.12859	156.727		11.1295	157.583		4.12886	181.635		12.1293	168.319		5.1297	137.742		13.1297	157.318		6.13084	148.391		14.1285	169.587		7.1307	145.057		15.1296	173.756		8.12942	203.69		16.1303	140.927
1.13159	170.35		9.1311	177.612		2.13145	133.346		10.1308	147.479		3.12956	149.981		11.1303	151.076		4.12983	169.497		12.1306	151.38		5.13123	133.581		13.1308	141.818		6.13181	134.488		14.1294	155.758		7.13167	128.037		15.1312	144.452		8.13088	188.823		16.1312	128.15
1.13257	151.499		9.13256	162.581		2.13229	126.474		10.1319	143.509		3.13074	134.896		11.1318	130.468		4.13102	143.998		12.1315	141.27		5.13283	116.668		13.1316	138.633		6.13348	126.215		14.1307	147.312		7.13299	120.289		15.1322	129.141		8.13255	171.024		16.1323	127.441
1.13375	135.609		9.1336	145.812		2.13368	123.677		10.1336	114.593		3.13247	126.113		11.1335	125.899		4.13282	132.815		12.1328	134.091		5.13401	109.192		13.133	141.192		6.13515	97.2178		14.1324	137.795		7.13473	122.737		15.1333	119.227		8.13373	161.675		16.1339	133.092
1.13548	132.024		9.13471	126.626		2.13541	119.499		10.1351	107.554		3.13407	119.221		11.1347	113.567		4.13428	124.3		12.1347	123.996		5.13498	108.431		13.1347	113.215		6.13626	92.4788		14.134	119.29		7.13618	103.4		15.1349	119.684		8.13463	141.902		16.1355	115.362
1.13715	118.553		9.13645	127.694		2.13666	109.732		10.1361	97.9067		3.13511	113.865		11.1357	102.607		4.13511	111.703		12.136	107.384		5.13644	93.6867		13.1359	95.8518		6.1373	87.6564		14.1349	116.979		7.13709	95.0347		15.1366	117.53		8.13609	142.731		16.1365	106.162
1.13812	110.441		9.13811	124.915		2.13763	106.734		10.1372	102.21		3.13616	98.6344		11.137	107.358		4.13622	109.606		12.137	108.604		5.13824	88.6138		13.1369	96.2634		6.1389	101.614		14.136	98.9624		7.13827	89.3056		15.1378	110.361		8.13783	128.177		16.1376	95.2136
1.13923	114.557		9.13916	119.567		2.13895	96.2485		10.1388	86.887		3.13782	87.3314		11.1387	93.7135		4.13789	117.011		12.1382	98.9117		5.13949	86.711		13.1382	100.131		6.14063	90.7729		14.1378	94.9124		7.14	85.9267		15.1387	98.026		8.13921	112.615		16.1392	90.8207
1.14097	115.1		9.1402	111.357		2.14069	85.19		10.1405	79.8785		3.13949	82.2525		11.1403	82.7416		4.13942	103.314		12.1399	84.9515		5.14039	92.1001		13.14	90.3793		6.14167	86.6573		14.1394	91.7422		7.1416	75.4528		15.1401	98.014		8.14019	101.587		16.1409	78.9033
1.14264	90.4926		9.1418	106.335		2.14215	75.7659		10.1416	78.7214		3.14053	83.4215		11.1412	83.854		4.14039	88.2141		12.1415	94.0684		5.14178	81.826		13.1415	87.4298		6.14251	81.1072		14.1404	89.3563		7.14257	67.4959		15.1419	78.3277		8.14144	100.278		16.142	76.2431
1.14354	81.99		9.14353	92.3864		2.14312	77.0871		10.1427	72.4973		3.14157	79.6101		11.1424	68.3369		4.1415	80.9015		12.1424	83.3857		5.14359	63.4877		13.1424	75.6735		6.14397	76.3117		14.1414	84.7755		7.14368	68.2236		15.1432	70.5886		8.14317	94.0386		16.143	79.807
1.14444	76.1059		9.14464	78.6856		2.1443	76.4996		10.1442	81.313		3.14324	75.7092		11.1442	73.8781		4.1431	75.7659		12.1436	67.8985		5.14491	68.6083		13.1436	63.2551		6.14563	71.0986		14.1432	73.6395		7.14542	60.7231		15.1441	73.7767		8.1447	82.6461		16.1445	75.5929
1.14604	77.2988		9.14561	77.8148		2.14604	64.6717		10.1459	74.6624		3.14497	71.9903		11.1457	75.6645		4.14477	83.5975		12.1454	65.4769		5.14581	67.2693		13.1453	62.2441		6.14688	55.2267		14.1449	67.49		7.14709	54.8777		15.1456	74.2419		8.14567	78.6468		16.1462	61.1823
1.1477	83.8778		9.14714	82.0407		2.14756	63.938		10.1471	75.9389		3.14595	70.6363		11.1467	64.7164		4.14595	81.5367		12.1469	59.4437		5.1472	58.5698		13.1469	67.6868		6.14786	55.1998		14.1458	58.0062		7.14799	52.4113		15.1474	76.0284		8.14678	75.3394		16.1474	57.6006
1.14882	92.0106		9.14895	78.8944		2.14854	59.5868		10.1481	61.0481		3.14678	60.4099		11.1478	61.3613		4.14692	77.1437		12.1478	57.863		5.14901	52.0445		13.1479	55.8142		6.14917	53.7116		14.1467	58.0778		7.14896	48.0393		15.1486	67.3379		8.14859	65.8467		16.1484	56.9176
1.14979	82.3717		9.15006	70.4126		2.14972	58.3879		10.1496	56.8371		3.14831	67.4422		11.1496	61.7937		4.14845	76.094		12.1488	62.8405		5.15032	47.6486		13.149	50.2611		6.15098	44.7945		14.1482	62.0174		7.15056	52.3517		15.1494	75.1635		8.15019	61.403		16.1499	62.9509
1.15132	74.9726		9.15089	72.214		2.15145	64.0633		10.1514	59.5838		3.14998	68.319		11.1512	53.5685		4.15018	68.4115		12.1505	50.8337		5.15116	56.184		13.1507	57.4187		6.15237	41.0785		14.1499	60.7141		7.15216	39.1251		15.1506	64.3734		8.15102	64.3347		16.1517	58.9217
1.15312	74.1376		9.15228	73.5709		2.15305	52.0892		10.1525	55.4772		3.15116	71.027		11.1521	55.4175		4.15136	59.4079		12.152	50.0344		5.15234	47.3026		13.1524	50.0314		6.15334	49.1099		14.151	54.4483		7.1532	37.8069		15.1524	50.8277		8.15199	62.5691		16.1528	57.7199
1.15437	64.776		9.15395	70.7795		2.15395	52.1221		10.1534	61.6834		3.15213	59.7657		11.1531	51.1021		4.15234	52.2712		12.1531	52.295		5.15401	48.3852		13.1532	37.1896		6.15452	48.5522		14.1519	44.6752		7.15424	51.2005		15.1537	47.6814		8.15366	60.2757		16.1537	55.0149
1.15534	64.6239		9.1552	76.3326		2.15493	49.1338		10.1547	56.5269		3.15359	62.0532		11.1547	53.6162		4.15386	57.5737		12.1542	55.1461		5.15546	56.2764		13.1542	41.8271		6.15626	39.3637		14.1535	47.0461		7.15577	50.3476		15.1547	43.3868		8.15526	52.2473		16.1551	50.7323
1.15673	64.3108		9.15617	75.8047		2.15652	50.6816		10.1564	55.2386		3.15532	63.4966		11.1563	45.3432		4.15567	61.8593		12.1557	57.9257		5.15644	53.0734		13.1558	48.9757		6.15779	38.2334		14.1552	47.4398		7.1575	42.1014		15.1559	47.738		8.1563	53.6102		16.1567	41.9613
1.15854	62.4319		9.15749	86.4337		2.15812	51.1081		10.1577	45.1792		3.15671	60.061		11.1574	49.4797		4.15685	54.5407		12.1574	50.3088		5.15755	46.8732		13.1574	50.5951		6.15876	34.3772		14.1565	34.0194		7.15875	40.5656		15.1576	42.7665		8.15734	51.5793		16.158	42.677
1.15986	70.359		9.1593	60.7708		2.15923	39.5247		10.1586	48.8475		3.15761	52.7066		11.1585	42.2357		4.15761	52.9839		12.1586	41.0069		5.15921	47.4905		13.1585	51.0932		6.15987	37.2671		14.1574	49.435		7.15966	44.6185		15.1592	36.0414		8.15887	58.3223		16.1589	39.6798
1.16076	71.0986		9.16075	59.2707		2.1602	43.0111		10.16	50.6339		3.15893	48.3524		11.16	33.3125		4.15893	48.7461		12.1596	43.2407		5.16088	53.7236		13.1595	33.8613		6.16167	43.3481		14.1588	48.2868		7.16105	47.0968		15.1602	50.944		8.1606	44.025		16.1603	45.9874
1.16215	73.5083		9.16166	62.1337		2.16173	50.8993		10.1618	53.8637		3.16067	45.7608		11.1618	29.0031		4.16067	50.7263		12.161	38.9014		5.16199	45.7816		13.161	38.5197		6.1632	47.0223		14.1606	44.5559		7.16285	50.1239		15.1613	45.9576		8.16185	45.5252		16.162	46.6942
1.16395	63.2759		9.16284	67.6003		2.16347	42.4593		10.1632	47.4995		3.1622	50.8009		11.163	33.7808		4.16199	68.0178		12.1628	35.1914		5.16296	45.9576		13.1628	37.7294		6.1641	40.5119		14.162	45.5639		7.16417	51.8149		15.163	39.9214		8.16276	44.8422		16.1635	42.3072
1.16527	55.9454		9.16464	63.4251		2.16472	48.0214		10.1642	41.8837		3.1631	53.3359		11.1639	35.093		4.16296	67.1679		12.1641	42.2923		5.16456	48.6536		13.1641	40.7415		6.16508	46.3274		14.1629	52.9392		7.16507	36.948		15.1646	45.7399		8.16422	47.0879		16.1644	42.9604
1.16611	54.8151		9.16624	63.2491		2.16562	48.1884		10.1654	33.8255		3.16435	57.6811		11.1653	37.1955		4.16414	51.3258		12.165	43.4823		5.1663	40.8131		13.165	43.8014		6.16674	45.9248		14.1642	44.0459		7.16639	29.0836		15.1657	44.8899		8.16602	32.7399		16.1656	39.6112
1.16722	59.7359		9.16721	63.094		2.16708	43.6672		10.1671	41.4811		3.16616	53.5476		11.1671	31.4993		4.16595	48.6089		12.1665	31.6096		5.16741	36.4619		13.1664	43.184		6.16827	37.9322		14.166	39.4054		7.16827	34.1893		15.1667	43.7119		8.16734	37.625		16.1673	36.0384
1.16895	58.9158		9.16832	64.615		2.16888	42.7098		10.1687	49.1189		3.16761	50.9142		11.1685	31.5917		4.16747	45.5639		12.1683	37.0315		5.16838	40.8041		13.1682	40.1122		6.16938	32.1822		14.1674	29.9097		7.16966	36.1308		15.1683	46.4288		8.16824	35.7849		16.1689	36.4142
1.17041	60.5322		9.17006	62.6139		2.1702	42.9902		10.1697	46.8076		3.16845	53.1301		11.1694	32.7906		4.16845	53.0227		12.1696	47.3354		5.16998	46.3006		13.1695	40.7236		6.17042	29.2357		14.1683	35.5791		7.17042	43.0826		15.1701	44.374		8.16963	29.8501		16.1699	46.1634
1.17139	56.1631		9.17166	58.8949		2.17111	44.7796		10.1708	36.0533		3.16956	43.533		11.1708	31.9317		4.16956	44.2905		12.1703	36.942		5.17171	42.1223		13.1705	37.8964		6.17195	33.071		14.1694	33.903		7.17167	46.5451		15.171	46.8791		8.17151	37.3983		16.171	41.7346
1.17257	67.323		9.17256	65.4262		2.17249	49.593		10.1725	35.2212		3.17123	39.9124		11.1726	35.8386		4.17129	39.7752		12.1716	38.29		5.17282	46.229		13.1718	35.8356		6.17369	32.6535		14.1711	35.9966		7.17334	35.6298		15.1719	40.0973		8.17276	40.9741		16.1728	29.525
1.17423	59.0649		9.17353	59.6852		2.17437	42.6591		10.1741	38.5227		3.17275	47.2728		11.1739	35.1347		4.17289	38.0902		12.1733	38.3079		5.17366	37.2939		13.1736	36.945		6.17487	36.3456		14.1726	44.5559		7.1748	34.3474		15.1734	35.4181		8.17352	46.5242		16.1744	29.0836
1.1759	53.142		9.17513	53.7832		2.17569	53.0168		10.175	42.6025		3.17372	43.4167		11.1746	24.4819		4.17393	45.7548		12.1748	30.1602		5.17512	43.2914		13.175	37.7234		6.17577	41.4722		14.1735	38.9819		7.17577	34.8186		15.1751	39.2981		8.17477	37.3506		16.1753	27.7803
1.17694	54.3797		9.17673	58.534		2.17645	45.6057		10.176	38.967		3.17484	44.9287		11.1759	33.6227		4.17497	45.6802		12.1758	27.8161		5.17678	41.6004		13.1758	30.4406		6.17723	47.3056		14.1746	30.2825		7.17688	34.4249		15.1762	41.8688		8.17651	33.3782		16.1762	29.0687
1.17798	57.0638		9.17784	66.0346		2.1777	45.1852		10.1776	38.2364		3.17643	46.2856		11.1776	39.3607		4.17671	45.7011		12.1769	36.3992		5.17803	38.3378		13.177	30.5241		6.17904	38.7225		14.1763	35.6179		7.17862	34.9051		15.1772	47.8693		8.17783	33.5571		16.1778	34.0879
1.17958	51.3675		9.17881	62.7153		2.17944	44.6036		10.1792	37.4967		3.17817	44.9645		11.179	42.0865		4.17838	57.8093		12.1786	35.2928		5.17901	31.0877		13.1786	25.6897		6.18036	30.1543		14.178	34.2967		7.18021	34.75		15.1787	42.9902		8.1788	33.7062		16.1794	33.2738
1.18132	60.4696		9.18034	63.0045		2.1809	40.8578		10.1803	36.608		3.17928	49.9927		11.18	42.3013		4.17935	50.1269		12.1802	27.3897		5.18033	36.6348		13.1801	21.5622		6.18126	34.7888		14.1791	36.8734		7.18125	28.1024		15.1804	38.3318		8.18005	38.979		16.1805	29.2655
1.18243	60.3234		9.18214	61.7132		2.18187	42.4742		10.1813	37.2164		3.18025	43.2735		11.1812	36.5156		4.18025	45.8144		12.1813	31.21		5.18206	32.6863		13.1811	31.9168		6.18265	39.5456		14.1801	40.1063		7.1823	27.5328		15.1818	39.978		8.18172	35.4807		16.1816	33.1783
1.18333	64.4331		9.18339	55.513		2.18305	49.1159		10.1828	34.5234		3.18171	45.895		11.1828	35.8773		4.18178	51.7552		12.1824	35.2719		5.18352	24.5863		13.1823	36.2919		6.18452	38.7076		14.1816	38.3109		7.18396	29.1045		15.1827	45.883		8.18331	31.2011		16.1831	36.6229
1.18493	61.2748		9.1843	58.0927		2.18472	38.5763		10.1845	35.2033		3.18352	45.3134		11.1845	29.8053		4.18345	51.8984		12.184	43.4763		5.18449	32.7012		13.1839	29.2566		6.18577	34.9349		14.1833	42.8828		7.18563	31.887		15.184	46.7837		8.18435	37.5981		16.1848	37.3208
1.18673	54.6809		9.18568	64.5792		2.18631	41.4662		10.1859	35.9787		3.18477	35.6805		11.1855	31.4456		4.18456	46.062		12.1857	37.3059		5.18567	39.9959		13.1855	30.36		6.18654	34.8097		14.1845	41.508		7.18674	41.3171		15.1858	41.9971		8.1854	43.8252		16.1861	40.5864
1.18777	49.435		9.18749	61.2301		2.18736	48.0422		10.1868	36.3754		3.18567	32.5222		11.1866	25.1201		4.18553	45.9278		12.1868	40.2942		5.18748	35.8744		13.1866	27.7595		6.18779	35.9221		14.1855	43.4644		7.18771	33.6943		15.1873	36.6826		8.18706	47.6635		16.187	35.4956
1.18861	57.0369		9.18881	65.4829		2.1884	45.3283		10.1881	40.825		3.1872	45.3164		11.1882	32.4298		4.18699	43.2347		12.1878	30.5539		5.18901	32.1793		13.1876	34.9379		6.18952	28.9613		14.187	44.1891		7.18931	34.255		15.1882	43.5658		8.1888	40.6013		16.1885	37.4341
1.19007	60.3741		9.18971	68.5606		2.19006	42.4563		10.19	45.5102		3.189	47.5263		11.1899	29.1492		4.18879	43.9207		12.1894	34.9826		5.18998	35.3316		13.1893	38.4392		6.19091	26.4204		14.1888	36.9212		7.19111	31.0132		15.1894	47.3056		8.18984	44.547		16.1902	40.5894
1.19173	67.645		9.1911	62.9031		2.1918	43.4047		10.1913	42.2506		3.19018	39.7901		11.191	30.1155		4.19004	47.0074		12.1912	34.3653		5.19116	39.2325		13.191	35.0095		6.19188	29.024		14.1899	31.3233		7.19216	32.0689		15.1912	50.1776		8.19081	35.3882		16.1915	36.0145
1.19298	57.4723		9.19298	57.7527		2.19291	51.3347		10.1922	37.9709		3.19102	37.3774		11.192	32.1822		4.19102	38.8805		12.1922	29.179		5.19289	38.1409		13.1921	40.6908		6.19313	33.6704		14.1908	45.2866		7.19299	34.0969		15.1927	38.7404		8.19248	31.0758		16.1924	36.8138
1.19402	53.7146		9.19429	75.3931		2.19388	42.8411		10.1936	39.0893		3.19234	37.7323		11.1936	39.3219		4.19233	48.3047		12.1931	33.4139		5.19442	36.8078		13.1931	32.5908		6.1948	38.5406		14.1921	41.8658		7.19445	35.093		15.1935	39.2563		8.19421	35.5016		16.1938	37.6995
1.19534	59.2349		9.19506	68.6829		2.19548	42.853		10.1954	41.6601		3.194	41.5766		11.1953	31.6782		4.19414	51.7075		12.1946	29.6055		5.19533	33.4408		13.1947	32.4864		6.1964	38.0783		14.1939	37.792		7.19612	28.2873		15.1946	41.5766		8.19526	42.1969		16.1957	35.9817
1.19715	50.1895		9.19631	67.982		2.19729	45.6713		10.1968	40.8638		3.19532	41.4215		11.1964	30.0678		4.19553	54.6153		12.1963	29.5011		5.1963	34.4041		13.1964	38.7821		6.19744	31.0162		14.1951	42.5756		7.19736	33.7629		15.1962	44.5977		8.19609	33.9508		16.197	39.31
1.19861	48.5552		9.19798	63.8217		2.19833	46.8374		10.1975	42.182		3.19629	40.3956		11.1973	35.1944		4.19643	52.0535		12.1974	31.0579		5.19789	37.7115		13.1975	38.0902		6.19848	28.5826		14.1961	42.0806		7.19834	32.9755		15.1978	50.4669		8.19762	37.6727		16.1978	34.6844
1.19951	50.3118		9.19937	67.6003		2.19916	40.2435		10.1988	41.2604		3.19754	47.0909		11.1987	33.1396		4.19775	54.3916		12.1984	42.182		5.19949	34.2311		13.1984	27.9652		6.20015	35.937		14.1974	33.6048		7.19966	28.9494		15.1988	43.6433		8.19928	41.1292		16.199	40.5029
1.20069	60.9766		9.20034	67.2931		2.20062	32.2986		10.2004	40.998		3.19928	42.9425		11.2003	41.9165		4.19956	51.0186		12.1999	34.4906		5.2006	33.3275		13.1998	33.2439		6.20181	31.5112		14.1992	31.8363		7.20139	34.4399		15.1999	32.0003		8.20046	42.5518		16.2007	33.9627
1.2025	63.6815		9.20152	62.593		2.20236	44.8959		10.2018	34.9141		3.20088	36.2024		11.2016	43.9266		4.20102	42.349		12.2016	33.238		5.20157	40.0794		13.2015	28.0487		6.20292	38.46		14.2006	27.1809		7.20285	29.4146		15.2015	39.1311		8.20144	37.7532		16.2021	31.6842
1.20402	68.5069		9.20325	49.1994		2.20354	49.435		10.2029	39.304		3.20185	44.8303		11.2026	39.3368		4.20178	36.9689		12.203	32.4596		5.2031	35.8982		13.2027	22.2571		6.2039	40.2792		14.2016	32.2329		7.20375	32.7578		15.2032	33.1664		8.20283	34.0969		16.2031	48.6476
1.205	57.7437		9.20485	58.5609		2.20451	55.2237		10.204	39.2325		3.20296	49.775		11.204	34.7202		4.20289	32.1166		12.2039	35.3674		5.20484	37.5773		13.2036	30.1065		6.20556	32.9278		14.2028	37.8576		7.205	37.2999		15.2043	34.5442		8.20463	41.2962		16.2043	42.3848
1.20618	72.8223		9.20589	55.6084		2.2059	53.5595		10.2057	39.8438		3.20463	44.3471		11.2058	32.6445		4.20456	48.0452		12.2052	31.1683		5.20609	33.5959		13.205	31.2816		6.20723	26.2892		14.2045	31.6931		7.20674	35.8684		15.2053	42.4951		8.20602	32.385		16.206	31.4695
1.20791	72.6225		9.20693	62.763		2.20763	41.8867		10.2074	35.1586		3.20629	37.8844		11.2071	31.207		4.20609	49.6527		12.2069	32.567		5.20706	30.4197		13.2068	36.0533		6.20827	38.6211		14.2061	31.3591		7.20827	45.5669		15.2068	32.5878		8.20692	35.3584		16.2076	25.8925
1.20951	51.3824		9.2086	64.117		2.20902	37.3357		10.2084	41.842		3.20734	38.1827		11.2081	41.6034		4.20706	49.9062		12.2084	30.0469		5.20845	29.9336		13.2082	28.7943		6.20917	39.3488		14.2071	32.4745		7.20924	35.9698		15.2086	30.533		8.20817	28.4096		16.2087	27.9951
1.21041	47.7201		9.21027	65.9004		2.20999	40.5119		10.2094	41.1024		3.20838	43.6851		11.2094	35.1019		4.20817	47.5889		12.2094	33.1396		5.21026	37.8815		13.2091	29.3759		6.21063	39.7633		14.2082	35.7044		7.21035	28.7854		15.2098	37.2999		8.20998	30.1155		16.2096	24.9143
1.21139	48.6417		9.21138	66.4968		2.21124	48.3971		10.2111	32.8861		3.21011	45.6057		11.2111	27.2674		4.20984	42.4862		12.2106	45.3909		5.21158	43.3928		13.2104	34.1625		6.2123	31.9109		14.2099	36.435		7.21216	26.3608		15.2107	41.8987		8.21144	35.4568		16.2113	25.4004
1.21305	50.0374		9.21242	56.4196		2.21298	50.1239		10.2128	30.3302		3.21178	47.2549		11.2126	23.3546		4.2115	58.379		12.2124	37.2671		5.21248	39.7454		13.2122	42.2953		6.21355	29.2327		14.2116	35.6507		7.21368	33.8911		15.2122	39.6231		8.21234	35.0542		16.213	33.4139
1.21465	50.613		9.21402	63.7859		2.21451	45.9486		10.2139	39.3935		3.21268	38.3974		11.2136	30.7149		4.21261	44.1533		12.2139	49.7511		5.21387	27.9444		13.2137	37.5415		6.21452	27.0407		14.2124	36.3545		7.21459	28.5617		15.214	41.3648		8.21359	31.5917		16.2141	31.3711
1.21569	61.7102		9.21575	72.6106		2.21548	49.086		10.2149	34.4757		3.21359	41.0636		11.2148	33.3185		4.21358	47.1356		12.2147	46.5958		5.21567	33.3036		13.2146	39.4382		6.21591	27.6133		14.2134	37.1687		7.21563	30.2348		15.2152	35.3703		8.21539	28.7794		16.2151	34.9647
1.21673	59.6435		9.21679	70.6482		2.21666	49.0234		10.2165	40.1689		3.21511	37.5892		11.2166	27.494		4.21518	47.4338		12.2158	36.0622		5.21699	39.2205		13.2158	32.4029		6.21765	36.2084		14.215	37.8516		7.21723	33.1485		15.216	42.7665		8.21685	42.9604		16.2167	33.6078
1.21826	61.0839		9.21763	72.1424		2.2184	44.869		10.2182	32.8503		3.21678	37.6816		11.2181	32.8891		4.21692	41.6601		12.2174	41.0666		5.21776	36.6378		13.2176	25.2275		6.21904	33.5571		14.2166	34.1088		7.21882	42.7248		15.2174	48.3554		8.21769	44.2338		16.2185	35.3793
1.22007	52.7871		9.21909	64.4629		2.21999	50.8098		10.2193	42.7486		3.21796	42.683		11.219	33.1694		4.2181	37.3953		12.219	37.455		5.21901	42.8619		13.2191	35.5284		6.22001	33.7897		14.2177	28.6482		7.21993	46.4198		15.219	42.9007		8.2188	35.2361		16.2195	36.6677
1.22125	47.9915		9.22075	75.1993		2.22083	49.9748		10.2202	45.6653		3.21893	44.0608		11.22	30.9804		4.219	48.8355		12.22	38.3199		5.22067	40.2375		13.22	35.3077		6.22126	37.5176		14.2187	30.5897		7.22091	40.3717		15.2203	37.115		8.22046	37.7681		16.2203	32.3105
1.22215	59.7419		9.22194	68.6471		2.22187	47.5054		10.2216	43.36		3.22039	47.6724		11.2217	28.2366		4.2206	50.5205		12.221	34.1178		5.22213	39.1698		13.221	31.8035		6.22299	44.0936		14.2202	35.9728		7.22243	35.4091		15.2213	35.0483		8.22199	36.1577		16.2218	30.882
1.22361	60.5322		9.22291	65.8885		2.22354	38.0902		10.2233	40.2733		3.2222	45.2717		11.2232	29.2178		4.2224	54.0248		12.2226	34.9737		5.2231	40.0526		13.2227	35.6059		6.22445	42.34		14.2219	41.7883		7.22424	31.6544		15.2226	30.0618		8.22303	35.0274		16.2235	31.2011
1.22541	58.3462		9.2243	71.9306		2.22506	48.3584		10.2245	36.5424		3.22345	49.1964		11.2243	37.1866		4.22352	52.3219		12.2244	38.1797		5.22428	40.148		13.2242	40.9175		6.22542	35.3077		14.2232	42.2714		7.22542	30.4435		15.2243	35.9728		8.22408	39.8737		16.2247	31.5351
1.22673	76.419		9.2261	73.2608		2.22611	55.8201		10.2254	39.9154		3.22442	46.0143		11.2253	34.6546		4.22435	45.2597		12.2256	39.6619		5.22595	30.6135		13.2253	39.2861		6.2266	37.1389		14.2241	27.8996		7.22632	34.917		15.2259	43.2616		8.22567	44.1682		16.2257	33.4467
1.22764	66.9293		9.22749	64.3496		2.22715	52.7185		10.2268	38.7076		3.22574	39.978		11.2269	33.2439		4.22574	42.185		12.2265	32.558		5.22762	34.4906		13.2264	35.1884		6.22841	39.0505		14.2255	29.4206		7.22778	40.8041		15.2269	42.3967		8.22741	34.422		16.227	36.3545
1.22902	60.8215		9.22839	61.3374		2.22868	43.533		10.2286	31.887		3.22754	39.7484		11.2287	27.8221		4.2274	44.1503		12.228	33.0829		5.22866	33.8344		13.2279	33.8404		6.22994	36.4589		14.2274	35.9221		7.22959	34.8783		15.228	38.5316		8.22852	27.1153		16.2288	34.6486
1.23083	49.8167		9.22964	67.0307		2.23048	38.5465		10.23	44.4217		3.22893	34.3086		11.2299	36.1279		4.22865	40.8041		12.2298	29.0687		5.2297	33.7927		13.2296	30.5658		6.23077	32.1256		14.2287	40.3628		7.23091	39.6619		15.2297	42.0567		8.22949	31.6126		16.2302	31.7975
1.23215	48.2063		9.23145	65.2025		2.23166	51.0991		10.231	46.8284		3.22991	41.9911		11.2308	37.0852		4.2297	38.8		12.231	24.1837		5.2313	38.0157		13.2308	32.0659		6.23181	32.7877		14.2296	40.3419		7.23174	35.9877		15.2313	41.0129		8.23102	32.8294		16.2312	33.6257
1.23291	58.3312		9.23291	62.0681		2.23256	43.1542		10.2322	46.7807		3.23116	49.8883		11.2322	35.266		4.23095	42.6562		12.2319	39.1639		5.23303	40.7385		13.2317	41.2366		6.23348	31.6902		14.231	29.2417		7.2332	35.5612		15.2324	34.9111		8.23276	36.608		16.2323	35.773
1.23416	57.0638		9.23388	55.5428		2.23402	44.4873		10.234	43.3331		3.23296	49.8197		11.234	38.1916		4.23268	45.3701		12.2334	42.4086		5.23414	34.4458		13.2332	40.1152		6.23501	39.0207		14.2328	27.2256		7.23507	32.1703		15.2334	34.4578		8.23401	33.8911		16.2341	34.0164
1.2359	69.1123		9.23506	68.5875		2.23583	35.9817		10.2355	27.4732		3.23442	38.1588		11.2353	37.5773		4.23421	42.3669		12.2352	40.8876		5.23512	41.001		13.235	35.4419		6.23605	39.6709		14.2342	29.8381		7.23632	32.1465		15.2351	38.3676		8.23491	34.249		16.2357	34.4518
1.23729	59.9268		9.23687	67.0844		2.23715	32.063		10.2365	34.8663		3.23518	43.8193		11.2362	31.3204		4.23518	51.63		12.2364	30.1841		5.23671	37.1568		13.2363	34.5085		6.23709	35.5642		14.2349	37.2999		7.23709	28.3321		15.2367	43.4435		8.23644	37.4997		16.2366	29.2924
1.23826	57.3053		9.23839	71.5668		2.23805	46.6644		10.2376	36.7899		3.23629	48.6417		11.2376	31.7856		4.23629	60.562		12.2372	31.2398		5.23845	34.4518		13.2372	27.7237		6.23869	42.5786		14.2361	33.3036		7.23834	31.2547		15.2377	43.3242		8.23824	39.2116		16.2378	28.4215
1.23944	57.0339		9.2393	64.1826		2.23944	51.0544		10.2394	32.5342		3.23803	45.8502		11.2394	37.4282		4.23803	50.5683		12.2385	30.2855		5.23949	43.2735		13.2386	26.9363		6.24042	39.3875		14.2378	33.3125		7.24007	43.697		15.2386	43.2079		8.23942	39.7394		16.2396	31.8303
1.24111	53.1062		9.24027	60.908		2.24124	40.7326		10.241	45.8502		3.23949	43.8759		11.2407	37.4908		4.23963	44.0638		12.2402	39.0804		5.24032	39.1639		13.2405	30.8342		6.24161	33.9597		14.2393	43.6373		7.24146	34.75		15.2401	37.7025		8.24019	38.8805		16.2411	30.3093
1.24277	56.682		9.24193	59.6375		2.24249	45.5788		10.2418	41.1829		3.24053	46.4467		11.2415	34.2788		4.24067	44.8541		12.2416	43.8729		5.24178	41.0099		13.2417	29.516		6.24258	31.1384		14.2402	42.0179		7.24243	34.8991		15.2418	34.413		8.24158	34.9319		16.242	32.0868
1.24382	61.2301		9.24353	57.4425		2.24333	37.4192		10.2429	40.0496		3.24164	48.2063		11.2428	26.9811		4.24178	51.1856		12.2426	37.2045		5.24345	40.318		13.2425	29.9127		6.24404	39.2623		14.2414	39.2653		7.24361	35.6537		15.2429	42.3102		8.24324	28.4126		16.243	43.4674
1.24486	51.1677		9.24457	71.4863		2.24458	38.6986		10.2445	41.1769		3.24331	42.7814		11.2445	35.3018		4.24352	43.9266		12.2438	31.1772		5.2447	37.4908		13.2438	36.6677		6.24577	43.4823		14.243	41.8122		7.24528	27.5954		15.2439	42.0209		8.24456	31.1414		16.2446	34.0551
1.24652	58.2358		9.24562	73.052		2.24631	39.653		10.246	40.6789		3.24497	38.0365		11.2459	37.2015		4.24511	34.7113		12.2455	28.347		5.24567	39.9273		13.2455	40.9473		6.24709	37.9441		14.2447	36.8347		7.24688	34.3653		15.2453	32.1465		8.24553	33.4467		16.2462	33.3632
1.24819	62.6437		9.24714	69.2137		2.2477	42.1104		10.2471	42.9454		3.24609	46.8433		11.2469	31.6693		4.24602	42.5876		12.2471	34.4369		5.24699	39.6917		13.2469	42.003		6.24799	33.3245		14.2458	33.1306		7.24792	34.1715		15.2471	47.8335		8.24685	34.4727		16.2472	30.9088
1.2493	58.3014		9.24888	71.8054		2.24868	41.9046		10.2481	43.023		3.24699	46.4706		11.248	29.7069		4.24692	55.3758		12.2481	43.1393		5.2488	31.3054		13.2479	36.1577		6.24945	30.1871		14.2467	29.2834		7.24896	30.0022		15.2484	44.2547		8.24859	35.6209		16.2482	28.9464
1.25027	62.6198		9.25006	64.1199		2.24986	39.0297		10.2497	46.7837		3.24859	48.7043		11.2498	33.2678		4.24852	56.6164		12.2492	38.1111		5.25019	31.6991		13.2491	38.1648		6.25126	29.182		14.2484	32.2001		7.25063	39.2235		15.2494	40.989		8.25005	35.6745		16.2498	31.4516
1.25194	57.4902		9.25103	56.8401		2.25159	36.5484		10.2515	46.387		3.25032	45.1941		11.2514	34.0253		4.25011	49.3992		12.2509	37.0941		5.25116	34.7172		13.2508	30.1483		6.25251	33.2708		14.2501	34.756		7.2523	31.544		15.2507	46.8195		8.25102	48.9697		16.2516	31.7677
1.25368	53.5536		9.25249	62.8107		2.25319	45.1553		10.2527	42.0567		3.2515	44.4784		11.2524	38.5823		4.25122	49.4946		12.2526	34.0104		5.25234	36.6826		13.2523	38.2155		6.25327	30.4555		14.2512	34.5025		7.25341	41.3469		15.2525	52.1728		8.25213	43.6821		16.2528	27.6461
1.25465	57.8541		9.25423	68.495		2.25423	47.5412		10.2536	45.1225		3.25247	40.5298		11.2535	30.9863		4.2522	59.5182		12.2536	23.2502		5.25414	35.0811		13.2534	39.0147		6.25459	28.3738		14.2522	34.5592		7.25438	39.9065		15.2539	48.931		8.25387	37.121		16.2537	29.6353
1.25555	54.1858		9.25555	70.3112		2.25527	43.3361		10.2551	41.3708		3.254	31.8214		11.2551	25.8866		4.25372	48.0661		12.2547	22.8237		5.25567	30.8313		13.2545	42.7874		6.25626	25.8001		14.2538	37.9948		7.25605	34.4727		15.2549	53.3209		8.25546	43.521		16.2551	28.347
1.25701	54.0188		9.25645	69.2734		2.25694	43.5926		10.2568	41.7644		3.25581	39.5217		11.2568	31.8721		4.25553	44.1801		12.2564	29.3103		5.25658	42.7367		13.2561	31.9854		6.25765	27.1839		14.2555	31.1712		7.25778	35.0751		15.2561	48.3285		8.25651	40.1421		16.2569	37.3774
1.25868	44.9555		9.25784	77.1736		2.25861	39.5456		10.2581	47.8663		3.25692	48.928		11.2578	27.9056		4.25678	50.0732		12.2581	34.8186		5.25776	43.8044		13.2577	35.9937		6.25862	28.8748		14.2567	33.8344		7.25882	32.9457		15.2579	46.7956		8.25755	33.2678		16.2582	35.3077
1.25986	49.8078		9.25971	72.372		2.25972	41.5288		10.2591	34.3564		3.25775	49.2948		11.2589	30.5956		4.25768	47.9229		12.259	35.3912		5.25956	44.8512		13.2589	40.1093		6.25987	31.2816		14.2574	33.739		7.25966	30.1065		15.2594	37.6876		8.25928	32.7071		16.2591	42.9484
1.26083	52.6857		9.26096	66.9233		2.26069	50.5862		10.2604	34.0939		3.25914	48.8624		11.2605	33.5452		4.25907	56.1482		12.2599	32.9905		5.26109	40.2733		13.2598	29.4683		6.26154	38.7672		14.2589	42.9872		7.26112	36.1815		15.2601	41.1292		8.26095	34.2878		16.2605	39.7752
1.26229	58.0956		9.2618	65.6469		2.26236	48.5373		10.2623	37.1478		3.26081	53.4283		11.2623	37.3536		4.26088	56.5448		12.2615	39.6709		5.26192	37.2999		13.2615	36.0712		6.26313	37.4222		14.2606	40.154		7.26278	44.377		15.2612	36.778		8.26192	43.7179		16.2623	34.7649
1.26402	61.2152		9.26305	58.5281		2.26409	43.694		10.2636	38.6807		3.26213	54.3141		11.2633	30.4107		4.26227	51.0932		12.2631	40.2792		5.26296	39.5754		13.2632	34.0283		6.2641	34.8514		14.2618	29.3222		7.26396	37.7085		15.263	38.4571		8.26283	40.3389		16.2636	30.369
1.26541	60.4934		9.26471	65.2592		2.26513	42.4295		10.2643	38.3885		3.2631	46.9925		11.2641	32.4477		4.26317	46.4616		12.2642	36.8198		5.26463	35.0721		13.2643	27.4732		6.26522	29.1373		14.2628	27.0198		7.26493	22.8953		15.2644	52.3547		8.26435	40.8817		16.2644	32.6803
1.26639	54.8718		9.2661	64.8357		2.26597	50.9619		10.2656	35.9131		3.26442	48.8862		11.2656	38.46		4.26449	49.936		12.2653	38.7553		5.26616	29.9694		13.2651	29.9366		6.26688	33.238		14.2642	39.8915		7.26632	26.6471		15.2654	55.1342		8.26595	39.2653		16.2657	30.0081
1.26764	56.5001		9.26707	70.1949		2.26749	41.5855		10.2673	37.8576		3.26616	38.0962		11.2673	37.0255		4.26629	56.1273		12.2667	42.1014		5.2672	38.3795		13.2666	31.8661		6.26855	35.1228		14.266	40.2256		7.26806	31.2846		15.2665	46.7926		8.26713	41.8092		16.2673	34.7798
1.26937	59.9208		9.26832	62.8196		2.26916	37.452		10.2686	34.8693		3.26768	45.6862		11.2685	36.0205		4.26768	52.6499		12.2685	38.5584		5.26824	31.9019		13.2683	35.6835		6.26959	33.8404		14.2674	43.2795		7.26945	31.3919		15.2682	34.1625		8.2681	38.4958		16.2687	38.7165
1.2709	58.3611		9.26999	51.7731		2.27034	53.6102		10.2696	32.2747		3.26859	47.07		11.2694	29.0627		4.26852	48.1526		12.2699	35.6238		5.26977	34.8097		13.2695	33.4438		6.27056	30.9983		14.2683	38.4779		7.27042	35.8147		15.2699	27.6998		8.26956	36.9868		16.2697	31.1712
1.2718	64.4838		9.27159	63.0433		2.27131	47.3295		10.2709	39.1549		3.26977	41.3171		11.2709	38.5913		4.2697	39.307		12.2708	36.1726		5.27151	49.426		13.2705	41.9315		6.27223	32.3254		14.2695	31.1146		7.27167	37.2611		15.271	38.3348		8.2713	38.5167		16.2709	30.7656
1.27305	54.4304		9.27256	61.9876		2.27277	39.7394		10.2725	40.0645		3.2715	34.4995		11.2726	33.1694		4.27136	54.9463		12.2721	26.0953		5.27276	46.5511		13.2718	36.0175		6.27397	32.898		14.2713	32.9308		7.27341	32.6326		15.2719	43.9117		8.27262	37.279		16.2726	42.1521
1.27486	58.4505		9.27367	66.8338		2.27458	43.0349		10.2742	30.8253		3.2731	38.293		11.274	30.4913		4.27275	57.2278		12.2739	34.0402		5.27366	33.3841		13.2736	38.0187		6.27494	38.3586		14.2728	28.3082		7.27493	27.8728		15.2735	44.3591		8.27352	34.7411		16.2742	43.1602
1.27632	53.9144		9.27534	65.6111		2.27597	52.7543		10.2752	29.6174		3.27407	40.5298		11.2749	29.1731		4.27379	55.2565		12.2753	32.8831		5.27512	32.4089		13.275	38.979		6.27577	29.9067		14.2737	30.8193		7.27584	38.7076		15.2753	42.2655		8.27491	44.2338		16.2752	33.074
1.27715	45.6832		9.277	75.1605		2.27687	46.387		10.2763	32.1017		3.27518	38.4928		11.2762	34.2341		4.27497	55.8052		12.2763	39.8051		5.27692	30.8193		13.2759	43.5002		6.2773	31.4218		14.2749	39.2235		7.27709	40.9443		15.2765	39.9273		8.27671	42.3549		16.2763	39.5724
1.27819	46.5391		9.27812	62.8614		2.27819	52.3308		10.2779	34.6099		3.27692	39.0595		11.278	37.5534		4.27664	53.2911		12.2775	41.4781		5.27824	33.9955		13.2772	44.0966		6.27897	33.3543		14.2767	35.5702		7.27889	23.6319		15.2774	37.2761		8.2781	38.9163		16.278	40.6252
1.27986	52.6469		9.27909	65.4172		2.27993	40.2017		10.2796	41.2038		3.27859	40.819		11.2795	32.8384		4.27824	47.7738		12.2793	26.9513		5.27914	32.0331		13.279	33.1604		6.28008	31.9794		14.2783	31.9347		7.28035	25.8836		15.279	38.6062		8.27901	30.3958		16.2796	34.0701
1.28139	54.332		9.28075	72.2617		2.28138	39.8021		10.2807	49.438		3.27949	41.2157		11.2804	29.5369		4.27935	55.3519		12.2808	35.7044		5.2806	33.3096		13.2805	29.358		6.28112	38.63		14.2792	32.2091		7.28118	36.8019		15.2808	41.2396		8.28033	36.8555		16.2807	36.8377
1.2825	61.2599		9.28249	71.9724		2.28236	42.7098		10.2817	37.4282		3.28039	39.5009		11.2817	45.7727		4.28032	44.3829		12.2816	40.1212		5.28241	44.3292		13.2814	38.5823		6.28258	40.1689		14.2801	34.6367		7.2823	41.5348		15.2819	46.0351		8.28213	33.1634		16.2816	34.0015
1.28354	58.3134		9.28346	64.8953		2.28361	40.2315		10.2834	31.7916		3.28199	37.5027		11.2835	45.1225		4.28192	38.2543		12.2827	42.3013		5.28366	43.2556		13.2826	36.5036		6.28431	34.4578		14.2818	34.8216		7.28396	29.021		15.2827	41.9225		8.28352	38.4183		16.2833	32.8801
1.28514	46.232		9.28437	61.6536		2.28534	38.1379		10.285	33.2648		3.28366	46.5004		11.2849	33.4318		4.28365	43.5717		12.2844	32.2091		5.28449	38.5614		13.2844	35.3584		6.28563	33.8404		14.2833	42.6234		7.28549	35.5284		15.2841	35.6149		8.28435	50.8933		16.2851	29.1999
1.2868	47.3772		9.28589	62.1516		2.28687	41.1262		10.2861	32.7578		3.28477	40.4642		11.2858	39.4233		4.28483	49.602		12.2858	32.6535		5.28574	39.2682		13.2859	43.2347		6.28654	33.8553		14.2844	32.9905		7.28653	40.5506		15.2858	41.2575		8.28546	44.9883		16.2861	28.9196
1.28805	48.9011		9.28749	66.5028		2.2877	48.09		10.287	36.1189		3.28574	41.2157		11.2869	37.9888		4.28574	40.2166		12.2869	38.3885		5.28741	41.7436		13.2868	47.2042		6.28786	30.363		14.2854	33.9358		7.28757	40.4164		15.2871	42.9097		8.2872	33.0859		16.2869	31.7588
1.28902	46.9179		9.28867	69.2764		2.28874	39.8289		10.2884	37.965		3.28727	48.4001		11.2885	29.6592		4.28734	48.0422		12.288	25.6897		5.2888	43.6344		13.2879	42.1253		6.28966	42.2088		14.287	36.3068		7.28917	37.5445		15.288	44.4933		8.28866	29.522		16.2885	37.7294
1.29048	49.9151		9.28964	66.2284		2.29041	43.2228		10.2901	29.2983		3.28907	48.4806		11.2901	34.6993		4.28914	56.8103		12.2897	28.01		5.28977	38.1588		13.2895	33.4139		6.29105	36.5543		14.2887	34.6516		7.29091	39.0118		15.2893	44.5917		8.2897	35.9489		16.2901	40.2673
1.29222	55.7903		9.29103	62.6437		2.29194	39.2981		10.2913	31.9765		3.29032	47.1386		11.2911	32.3343		4.29025	49.3783		12.2913	30.9148		5.29095	37.6697		13.291	40.3031		6.29202	34.3951		14.2899	43.0021		7.29209	34.1774		15.291	44.3442		8.29081	32.2598		16.2912	47.3145
1.29354	62.9002		9.29284	70.4902		2.29298	37.3089		10.2922	39.3517		3.29122	55.7963		11.2921	30.8283		4.29102	48.2212		12.2924	42.6234		5.29269	45.5311		13.2921	38.6121		6.29327	31.4486		14.2909	42.9991		7.29306	27.84		15.2926	45.7309		8.29241	32.5878		16.2923	42.7933
1.29444	50.3446		9.29423	65.4441		2.29402	47.4666		10.2936	40.6848		3.29268	48.5254		11.2937	40.1719		4.29247	41.0129		12.2934	42.6472		5.29428	46.4497		13.2932	34.6099		6.29508	28.5378		14.2924	41.6541		7.29452	27.8251		15.2935	44.4903		8.29408	34.0015		16.2937	33.1247
1.2959	48.9817		9.29513	64.9311		2.29562	54.2186		10.2954	33.4646		3.29442	44.5231		11.2955	37.8785		4.29421	49.5244		12.2949	37.0762		5.29526	36.8227		13.2948	38.1529		6.29654	30.5927		14.2942	38.0097		7.29625	37.5504		15.2946	41.4155		8.29519	34.5472		16.2954	29.2834
1.2977	44.3382		9.29638	65.7841		2.29736	42.9126		10.2968	35.8087		3.29581	40.9533		11.2966	31.3382		4.29546	47.7768		12.2967	33.6257		5.29637	34.8812		13.2965	34.8693		6.29737	46.4527		14.2954	36.9301		7.2975	34.756		15.2964	46.9507		8.29623	40.8429		16.2968	31.2518
1.29895	52.7543		9.29818	78.62		2.29854	40.5506		10.2977	35.0572		3.29671	45.8293		11.2976	45.3074		4.29643	44.3054		12.2979	38.9551		5.29803	39.1937		13.2977	38.2781		6.29848	43.4524		14.2963	35.3584		7.29841	32.4805		15.298	48.1347		8.29776	36.3963		16.2978	35.937
1.29972	55.2624		9.29964	70.1442		2.29951	44.7229		10.299	28.3679		3.2981	46.0411		11.2991	37.5236		4.29775	45.6266		12.2988	37.2253		5.2997	33.9895		13.2986	35.1079		6.30015	34.2788		14.2978	32.0808		7.29993	40.5477		15.299	39.0237		8.29949	40.8906		16.299	45.2567
1.30104	51.7343		9.30062	59.7687		2.30097	52.1906		10.3008	27.9265		3.29991	41.9762		11.3009	28.2098		4.29949	39.486		12.3003	32.5133		5.30074	36.8257		13.3001	31.4814		6.30167	37.4878		14.2996	43.1244		7.30174	40.0973		15.3001	38.2006		8.30067	42.3639		16.3007	40.834
1.3027	45.9457		9.30186	55.7515		2.30277	53.6192		10.3023	37.7562		3.30129	39.5128		11.3021	28.0637		4.30095	43.4614		12.3022	33.0143		5.30171	35.7491		13.3019	34.6367		6.30265	34.0343		14.3008	28.1203		7.30299	31.723		15.3018	39.3667		8.30164	44.368		16.3023	35.4747
1.30402	48.3285		9.30367	70.857		2.30395	53.0406		10.3032	34.3236		3.30213	41.675		11.303	44.198		4.30192	53.4492		12.3033	33.1157		5.30338	39.9512		13.3031	39.1937		6.30376	29.5518		14.3017	27.9205		7.30375	37.2939		15.3035	32.6922		8.30317	35.5493		16.3032	28.3917
1.305	61.2837		9.30513	63.5712		2.30486	45.2538		10.3045	34.6218		3.30324	40.2256		11.3045	38.4988		4.3031	49.0025		12.3041	33.235		5.30512	38.3228		13.3041	30.7477		6.30536	30.7865		14.3029	32.1166		7.30507	31.1951		15.3044	41.0725		8.30498	32.2657		16.3044	32.6982
1.30625	58.6175		9.30596	59.6017		2.30638	42.3311		10.3063	33.1932		3.30497	47.8812		11.3063	35.421		4.30483	45.552		12.3055	34.4548		5.30616	41.1978		13.3056	33.1157		6.30709	26.4621		14.3046	36.3247		7.30674	31.8184		15.3053	43.6344		8.30609	32.9636		16.3062	34.1655
1.30798	52.7096		9.30707	70.2456		2.30819	45.9278		10.3077	31.7766		3.30643	46.4765		11.3076	28.6213		4.30636	50.4132		12.3072	34.3921		5.30699	40.4194		13.3074	34.583		6.3082	36.271		14.306	23.4023		7.30813	34.1893		15.3069	44.2398		8.30685	39.0476		16.3077	31.3532
1.30958	54.1739		9.30874	65.5216		2.30944	49.4678		10.3086	45.7757		3.30741	47.41		11.3083	27.2047		4.30733	52.7215		12.3085	32.0689		5.30852	33.8225		13.3086	37.4639		6.30917	41.7436		14.307	30.5628		7.3091	36.1428		15.3085	47.6844		8.30824	36.2352		16.3085	35.3853
1.31055	55.5815		9.31027	52.6469		2.3102	45.4953		10.3096	48.8564		3.30859	48.3434		11.3096	22.606		4.30852	52.1638		12.3094	42.7486		5.31019	34.3802		13.3094	35.8177		6.3107	41.5706		14.3082	35.7879		7.31035	35.1019		15.3096	41.0576		8.30998	38.8925		16.3096	39.0833
1.31166	54.3528		9.31124	48.2778		2.31152	41.171		10.3113	41.4364		3.31025	49.0532		11.3113	21.5264		4.31025	46.2141		12.3108	39.6023		5.31137	42.2655		13.3107	37.8069		6.31251	38.5077		14.3099	32.3343		7.31202	40.8906		15.3106	36.7512		8.3113	39.7335		16.3112	39.9094
1.31333	59.9745		9.31235	61.6506		2.31326	41.7376		10.3129	39.5605		3.31192	42.9007		11.3126	24.8756		4.31185	43.5091		12.3125	36.772		5.31234	39.6858		13.3125	38.2602		6.31369	34.6993		14.3115	33.6734		7.31361	38.2602		15.3121	34.4369		8.3122	56.7089		16.3128	40.7445
1.31507	52.0117		9.31395	56.3868		2.31458	40.8847		10.3138	37.0703		3.31296	42.6979		11.3136	29.2715		4.31275	53.5864		12.314	29.9932		5.3138	39.5605		13.3138	36.6736		6.31459	42.9484		14.3125	34.4935		7.31459	38.9968		15.3139	38.3795		8.31352	41.0457		16.3138	36.9868
1.31611	55.1133		9.31569	53.7534		2.31555	44.1354		10.3149	39.0953		3.31393	44.9048		11.3149	29.7785		4.31372	47.1684		12.315	38.5913		5.31553	40.5954		13.3148	33.3752		6.31612	40.6491		14.3135	28.1829		7.3157	38.7165		15.3151	38.5256		8.31526	40.0943		16.3148	40.0884
1.31708	52.1668		9.3168	47.8872		2.3168	49.1367		10.3165	39.143		3.31553	48.3196		11.3166	37.3834		4.31532	40.9741		12.3162	36.5424		5.31685	34.9737		13.316	36.0772		6.31792	29.7218		14.3153	31.6245		7.31736	27.1183		15.316	44.5559		8.31671	38.5018		16.3164	29.516
1.31875	49.4827		9.31777	56.4166		2.31854	54.0457		10.3182	42.9574		3.31727	41.6601		11.3182	32.5282		4.31692	34.1237		12.3179	30.2736		5.31782	39.0744		13.3177	37.2999		6.31911	30.6076		14.3169	32.2836		7.31903	45.3671		15.3175	42.9872		8.31769	43.0647		16.3182	26.0804
1.32048	63.1447		9.31923	54.8539		2.32013	43.9803		10.3194	40.3717		3.31845	37.2015		11.3192	25.3647		4.31803	47.1416		12.3195	28.2098		5.31908	29.2059		13.3193	37.3685		6.31987	39.3637		14.318	24.5028		7.32007	43.1453		15.3192	37.5236		8.31887	39.4412		16.3194	38.5823
1.32145	65.0594		9.32103	56.3957		2.32111	37.6906		10.3204	40.2107		3.31935	45.212		11.3203	25.2841		4.319	46.6018		12.3205	30.8342		5.32081	24.3924		13.3203	32.0928		6.32126	34.3236		14.319	33.1455		7.32112	33.2201		15.3206	46.2618		8.32053	27.4225		16.3203	26.7455
1.32236	54.6868		9.32228	53.318		2.32222	36.447		10.3218	36.2263		3.32095	53.2374		11.322	30.5509		4.32053	38.6241		12.3216	36.5036		5.32234	41.6332		13.3214	40.4105		6.32292	32.3433		14.3206	37.6578		7.32278	27.3897		15.3215	48.3047		8.32213	26.4085		16.3218	34.2937
1.32389	55.7963		9.32318	66.5147		2.32395	46.1186		10.3236	42.3013		3.32275	51.4838		11.3236	25.4094		4.32234	49.7123		12.3233	39.2086		5.32331	44.1384		13.3231	37.0852		6.32424	29.3132		14.3224	33.8732		7.32445	34.0641		15.3229	46.7688		8.3231	36.8764		16.3236	44.3322
1.32548	49.4887		9.32471	62.8942		2.32555	47.7112		10.3249	38.3706		3.32386	40.4463		11.3246	33.6018		4.32352	53.318		12.3249	35.5851		5.32449	44.2428		13.3248	35.7551		6.32522	34.6397		14.3234	37.8129		7.32542	37.4401		15.3247	39.9184		8.32421	35.9877		16.3248	37.7711
1.32666	58.4923		9.32652	57.1473		2.32659	44.5529		10.3258	33.2499		3.3247	46.5779		11.3257	30.0141		4.32442	45.5102		12.3259	29.5846		5.3263	27.7624		13.3257	28.4633		6.32647	30.7328		14.3242	36.3724		7.32632	34.9737		15.326	36.8317		8.32595	41.0904		16.3257	34.2818
1.32764	63.3445		9.32777	50.3595		2.3277	36.5752		10.3272	37.0554		3.32609	51.0872		11.3274	29.4027		4.32588	38.9163		12.3268	40.5864		5.32776	29.6115		13.3268	21.9976		6.3282	29.4087		14.3258	33.2887		7.32785	23.0802		15.3269	37.6548		8.32762	38.299		16.3273	30.6046
1.32909	55.8589		9.32853	45.6653		2.32937	40.4224		10.3291	46.0232		3.32782	39.5128		11.3291	36.1905		4.32768	40.7952		12.3284	31.2905		5.32859	31.4635		13.3285	32.6147		6.32973	30.3332		14.3274	50.6339		7.32945	27.5089		15.3281	39.4084		8.32859	31.4307		16.3291	36.8287
1.3309	57.1473		9.32985	54.9225		2.33104	41.4006		10.3303	38.2483		3.32907	40.5298		11.3301	28.9852		4.329	47.234		12.3301	33.238		5.3297	37.2939		13.3302	35.5642		6.3307	31.7826		14.3286	46.903		7.33063	42.2655		15.3297	42.6442		8.32949	31.6395		16.3303	35.8177
1.33222	60.5143		9.33152	53.6013		2.33201	41.0636		10.3311	33.4736		3.33004	38.8269		11.331	33.7987		4.3299	53.3687		12.3312	37.8487		5.33137	35.8475		13.3311	34.8842		6.33181	35.6179		14.3296	33.2947		7.33167	37.9679		15.3312	37.4729		8.33109	33.8762		16.331	31.9407
1.33312	47.1296		9.33284	55.7008		2.33291	34.8067		10.3324	34.917		3.33136	34.413		11.3325	40.4105		4.33129	46.5749		12.3322	33.581		5.33289	35.9787		13.3321	31.2309		6.33355	33.6674		14.331	31.7886		7.33306	32.8861		15.3321	42.689		8.33269	33.2887		16.3323	34.079
1.33444	63.8008		9.33381	57.2278		2.33444	44.3292		10.3341	30.032		3.3331	42.012		11.3341	32.0063		4.3331	41.4245		12.3337	23.4977		5.33387	35.9847		13.3336	32.5192		6.33515	31.9944		14.3328	34.3981		7.33487	30.8939		15.3333	38.1499		8.3338	37.8069		16.3341	38.3527
1.33625	62.8107		9.33506	49.6318		2.33611	36.2561		10.3354	31.8631		3.33456	45.8204		11.3353	34.2132		4.33442	46.7539		12.3354	19.5432		5.33498	29.4355		13.3352	32.8652		6.33619	35.3405		14.3341	34.6397		7.33625	31.5649		15.335	36.0205		8.33477	36.8705		16.3354	40.0377
1.3377	46.056		9.3368	58.3163		2.33729	43.3898		10.3364	33.7957		3.33553	45.3164		11.3363	35.424		4.33525	52.2205		12.3367	28.9494		5.33658	36.2561		13.3364	21.6278		6.33723	33.8046		14.3351	37.3297		7.33716	32.9845		15.3366	42.8411		8.3363	39.0505		16.3364	41.7853
1.33861	49.7302		9.33832	65.635		2.33826	35.0154		10.3377	33.745		3.33671	41.1203		11.3377	39.1788		4.3365	46.0739		12.3376	30.4078		5.33831	29.2536		13.3373	22.4032		6.33897	29.2178		14.3363	39.471		7.33841	36.2889		15.3377	38.7821		8.33803	40.2643		16.3376	47.3056
1.33986	51.7731		9.3393	68.6292		2.33972	40.321		10.3393	33.7002		3.33845	35.1437		11.3395	38.2423		4.33817	53.5894		12.339	37.0524		5.33942	27.5537		13.3388	26.8588		6.34063	33.9597		14.3381	33.2231		7.34021	38.2244		15.3387	40.7534		8.33935	41.2575		16.3393	47.3951
1.34166	57.9137		9.34041	63.434		2.34152	41.8867		10.3409	29.1641		3.33997	39.7991		11.3408	39.6738		4.33963	50.5116		12.3408	35.1258		5.34039	34.4399		13.3406	22.2302		6.34154	32.9159		14.3396	33.5511		7.34167	39.6023		15.3403	47.0879		8.34026	43.1542		16.3409	32.0391
1.34312	55.7545		9.34214	55.4116		2.34277	41.8778		10.342	42.7516		3.34095	47.404		11.3417	41.8957		4.3406	47.3921		12.3422	39.9303		5.34192	43.861		13.3419	25.5585		6.34244	35.0274		14.3405	32.224		7.34257	38.2393		15.342	36.0086		8.34165	36.0235		16.3419	33.7599
1.34395	52.635		9.34374	57.872		2.34374	44.1443		10.343	37.5892		3.34213	49.3455		11.3431	44.0012		4.34178	42.4563		12.3431	37.8576		5.34366	34.5413		13.3428	29.8859		6.34404	33.9925		14.3417	28.3321		7.34382	38.4481		15.3431	33.229		8.34345	34.2937		16.343	30.1781
1.34507	54.5139		9.34478	58.5162		2.34506	49.8227		10.3447	35.4121		3.34386	45.4566		11.3449	35.5403		4.34345	42.4951		12.3444	28.9375		5.34491	33.5571		13.3441	30.1632		6.34563	34.8544		14.3435	27.9802		7.34563	38.5197		15.3442	34.7739		8.34477	35.7938		16.3447	35.6984
1.34673	55.2267		9.34582	53.6341		2.34687	51.5316		10.3464	30.1781		3.34546	38.8746		11.3463	32.7071		4.34504	43.0797		12.3463	35.0632		5.34581	43.5688		13.3459	28.5378		6.34681	34.9051		14.3451	27.1779		7.34709	37.3178		15.3458	36.8347		8.34567	41.5557		16.3464	35.1168
1.34826	55.8112		9.34756	49.0741		2.34826	49.3723		10.3475	38.8149		3.34636	43.1542		11.3472	33.2111		4.34609	48.2689		12.3476	41.6571		5.34734	39.0654		13.3473	32.555		6.34779	31.5828		14.3459	33.7718		7.34792	43.521		15.3475	42.8083		8.34706	38.2334		16.3473	27.8549
1.3493	52.6738		9.34923	53.4701		2.34923	43.4763		10.3484	38.7612		3.34734	45.9337		11.3485	37.0703		4.34713	54.9732		12.3484	41.5616		5.34914	34.5323		13.3483	37.9023		6.34924	27.9205		14.3469	38.0008		7.34903	42.9156		15.3485	50.1895		8.34894	43.5031		16.3484	31.2398
1.35034	53.6818		9.3502	49.7809		2.35048	37.1717		10.3502	37.0434		3.34893	51.6807		11.3503	30.038		4.34879	46.4527		12.3496	31.7677		5.35033	37.5087		13.3496	31.1384		6.35105	33.8195		14.3486	33.3036		7.3507	35.1974		15.3494	42.3162		8.35026	37.7473		16.3501	38.8597
1.35194	52.9362		9.3511	51.9043		2.35229	37.7681		10.3518	35.2332		3.35046	52.1459		11.3518	29.5757		4.35046	42.5279		12.3513	40.0645		5.35116	35.7133		13.3514	31.0997		6.3523	34.8604		14.3501	36.2352		7.35223	35.0125		15.3508	35.7491		8.35102	40.0496		16.3518	33.1634
1.35368	47.3175		9.35263	46.4944		2.35368	39.0356		10.3528	32.9905		3.35157	44.8154		11.3526	32.0242		4.35157	46.8135		12.3527	44.7438		5.35248	34.0701		13.3528	40.2494		6.35327	34.1178		14.3512	43.3809		7.3532	41.2157		15.3525	33.1157		8.3522	40.1093		16.3528	38.1588
1.35486	54.6809		9.3543	46.9268		2.35451	43.521		10.3537	32.0301		3.35261	50.3267		11.3537	30.4435		4.35254	47.1356		12.3538	52.1757		5.35414	37.628		13.3536	34.7321		6.35459	36.614		14.3522	37.0971		7.35431	37.0494		15.3537	37.2761		8.35387	39.9363		16.3536	34.246
1.35583	55.5308		9.35541	54.7047		2.35562	44.8064		10.3552	32.728		3.35414	45.889		11.3553	32.9666		4.35414	44.4098		12.3549	44.3322		5.35546	28.4036		13.3548	34.9767		6.3564	41.7137		14.3538	28.5259		7.35591	28.4722		15.3547	40.4105		8.35533	45.3462		16.3551	32.6833
1.35729	53.8458		9.35645	51.4838		2.35736	42.7218		10.3569	25.3617		3.35595	55.7635		11.3569	31.5619		4.35595	49.0592		12.3565	40.8548		5.35644	37.4997		13.3564	33.3513		6.35779	33.6018		14.3555	33.7748		7.35764	29.7874		15.356	43.6672		8.35637	42.856		16.3568	36.948
1.35909	44.2577		9.35791	55.8052		2.35881	49.0413		10.358	27.327		3.3572	54.8718		11.3579	34.3713		4.35699	47.41		12.3582	44.6066		5.35769	37.7294		13.3579	36.6826		6.35869	35.436		14.3567	39.5844		7.35875	35.6567		15.3578	41.9315		8.35748	35.6954		16.358	31.1474
1.36034	58.7786		9.35964	54.9374		2.35986	56.0677		10.359	39.9393		3.3581	46.1425		11.359	40.3598		4.35782	48.1615		12.3592	36.4738		5.35942	42.9574		13.3589	38.9402		6.36001	29.6652		14.3577	39.7544		7.35966	32.8592		15.3592	45.1583		8.35915	35.4002		16.3589	37.2373
1.36125	58.7786		9.36089	50.3028		2.36097	41.5974		10.3604	38.3974		3.35949	39.3756		11.3606	33.1008		4.35928	38.0574		12.3603	38.6241		5.36095	41.5706		13.36	35.6805		6.36181	30.5658		14.3592	39.8915		7.36125	34.6635		15.3602	39.3786		8.36081	37.9202		16.3604	37.7443
1.36277	50.4997		9.36187	44.6991		2.36256	40.7594		10.3622	31.3204		3.36136	34.2341		11.3623	31.6842		4.36095	39.9035		12.3619	36.5871		5.36192	33.1127		13.3616	40.3806		6.3632	31.5947		14.361	34.5979		7.36299	37.2373		15.3614	32.9905		8.36185	37.8278		16.3621	27.4135
1.36458	56.8371		9.36318	47.1416		2.36423	38.8119		10.3636	35.5463		3.36268	45.6623		11.3634	26.2504		4.3622	47.6694		12.3636	37.4401		5.36303	28.0577		13.3634	36.4678		6.36404	30.9386		14.3621	33.7569		7.36417	39.0505		15.3631	34.3176		8.3629	37.7294		16.3635	31.1921
1.36576	46.1216		9.36499	42.2446		2.36534	49.9688		10.3645	37.5146		3.36352	52.8975		11.3644	35.4956		4.36317	51.3795		12.3647	37.8278		5.36477	35.3525		13.3645	38.0962		6.36515	32.0868		14.363	39.7663		7.36507	43.4823		15.3647	33.5392		8.36442	48.9787		16.3644	37.3506
1.36652	53.5685		9.36638	38.469		2.36638	48.3226		10.3658	36.0414		3.36497	49.7541		11.366	34.6039		4.36456	51.5614		12.3657	46.1157		5.36644	37.5027		13.3655	44.0698		6.36681	34.085		14.3646	37.4878		7.3666	34.4906		15.3657	41.4692		8.36616	43.1095		16.3657	39.3607
1.36791	55.847		9.36728	46.0143		2.36791	45.9844		10.3676	45.4476		3.36685	46.6077		11.3678	28.6899		4.36629	47.1207		12.3673	38.9998		5.36748	32.5491		13.367	43.2496		6.36834	28.3917		14.3664	30.9267		7.36841	36.8555		15.3668	39.2802		8.36734	39.9244		16.3675	37.0852
1.36958	46.4765		9.36853	52.9869		2.36965	40.8608		10.3691	37.4639		3.3681	38.4988		11.3689	35.0721		4.36768	39.3667		12.369	33.3394		5.36852	35.0453		13.3688	34.2341		6.36931	33.7718		14.3676	36.7422		7.36959	44.5619		15.3686	36.9987		8.36824	31.383		16.3689	30.542
1.3709	43.1661		9.37034	53.315		2.37083	54.0844		10.37	35.1497		3.36886	42.5935		11.3699	28.7705		4.36865	46.4198		12.3701	34.8902		5.37019	40.0287		13.37	39.5903		6.37042	40.2971		14.3684	40.2017		7.37035	31.213		15.3701	40.318		8.36984	29.9037		16.3698	32.7668
1.3718	49.0383		9.3718	50.267		2.3718	50.5921		10.3712	41.6034		3.37011	45.212		11.3715	24.0107		4.3699	46.6465		12.371	36.1428		5.37185	39.1281		13.3709	38.3974		6.37209	42.3162		14.3697	31.9168		7.37174	37.9799		15.371	43.7059		8.37158	30.1811		16.3711	33.8553
1.37312	57.6781		9.37263	43.4942		2.37333	42.2953		10.373	41.678		3.37185	45.2478		11.3732	30.9833		4.37164	48.9101		12.3724	29.2536		5.37283	46.724		13.3725	45.3313		6.37376	40.1689		14.3715	36.8078		7.37341	40.9264		15.372	43.7656		8.37269	36.8466		16.3729	28.854
1.37486	53.1867		9.37374	48.8743		2.37513	37.5922		10.3745	38.0336		3.37331	37.5474		11.3744	31.9765		4.37317	43.9654		12.3741	32.4685		5.37373	46.7091		13.3743	38.1439		6.37487	28.1859		14.3728	34.7798		7.37473	40.0228		15.3737	37.2313		8.37352	45.8681		16.3744	31.6216
1.37639	54.8121		9.37541	41.3976		2.37624	38.299		10.3753	37.7294		3.37428	44.2636		11.3751	36.5454		4.37407	53.5685		12.3753	36.9271		5.37526	44.8452		13.3755	31.6275		6.37584	29.7039		14.3737	38.7791		7.3757	36.4798		15.3752	33.739		8.37498	43.3958		16.3752	36.3933
1.37736	60.5083		9.37694	51.2989		2.37708	44.2905		10.3764	38.6509		3.37546	38.8686		11.3765	30.6106		4.37525	46.9388		12.3763	35.0721		5.37692	38.5495		13.3762	30.7865		6.37737	34.6904		14.375	40.0049		7.37695	33.8195		15.3763	35.937		8.37665	46.0143		16.3763	34.4786
1.37847	50.3446		9.37798	52.2175		2.37847	45.8085		10.3781	35.0572		3.3772	43.4226		11.3782	38.3914		4.37706	35.4926		12.3776	31.1086		5.37803	38.8955		13.3776	32.9219		6.37917	27.8549		14.3767	29.8769		7.37868	33.9239		15.3774	34.4399		8.3779	42.8083		16.378	37.6727
1.3802	49.599		9.37902	44.7796		2.38013	40.8071		10.3795	40.7445		3.37879	43.4345		11.3795	35.5791		4.37865	43.2646		12.3794	34.9349		5.37908	44.2845		13.3793	29.0508		6.38035	29.7636		14.3783	37.9381		7.38021	38.2751		15.3789	31.3919		8.37887	38.7881		16.3795	31.4784
1.3818	48.3733		9.38068	48.3166		2.38145	41.8718		10.3806	35.1854		3.37984	43.8521		11.3804	35.761		4.37949	45.7965		12.3809	37.5713		5.38053	39.134		13.3806	27.1719		6.38126	36.7989		14.3792	43.7715		7.38118	40.1122		15.3806	32.722		8.38019	41.8569		16.3805	37.789
1.38284	49.7243		9.38235	48.1019		2.38243	39.143		10.3817	35.6298		3.38088	43.8222		11.3817	31.8959		4.38053	48.4627		12.3818	30.882		5.38227	29.0269		13.3816	40.3419		6.38279	39.483		14.3803	38.472		7.3823	31.8959		15.3819	30.9923		8.38192	36.6319		16.3816	43.0349
1.38395	54.4274		9.38346	51.9491		2.38374	31.7886		10.3833	37.5027		3.38254	41.9881		11.3835	33.3931		4.38213	51.9789		12.383	29.6473		5.38359	30.2378		13.383	42.0478		6.38459	33.5511		14.3821	30.2109		7.38403	25.4929		15.3828	38.2244		8.38338	35.4717		16.3832	50.9172
1.38562	57.6781		9.38443	47.3891		2.38548	39.6649		10.385	41.0457		3.38421	37.6995		11.385	27.0169		4.38365	49.1338		12.3847	33.7211		5.38449	34.8097		13.3847	36.3933		6.3857	37.8755		14.3837	30.4913		7.38563	31.5917		15.3842	40.2971		8.38435	36.7213		16.3849	44.5052
1.38729	53.6937		9.38596	49.0443		2.38694	44.6662		10.3861	40.3031		3.38532	44.7289		11.386	20.6943		4.38477	49.0443		12.3863	33.1724		5.38581	36.2949		13.3861	35.3137		6.38654	34.5353		14.3847	43.5986		7.38667	30.867		15.386	39.2384		8.38553	37.0255		16.386	28.3529
1.38826	50.6816		9.38777	54.2276		2.38791	43.6135		10.3871	36.11		3.38629	50.5593		11.3871	27.673		4.38581	41.4513		12.3873	37.2253		5.38762	29.5548		13.3871	33.2618		6.38792	25.6957		14.3858	39.9244		7.38771	34.5979		15.3874	43.53		8.38727	35.2719		16.3869	31.4993
1.38916	47.9736		9.38895	57.8571		2.38909	44.2756		10.3886	27.2107		3.38789	43.6463		11.3889	40.9861		4.3874	47.0581		12.3884	38.2751		5.38907	41.4871		13.3883	27.5089		6.38959	24.8547		14.3875	36.9957		7.38945	35.7133		15.3883	42.1611		8.3888	38.6867		16.3885	34.7172
1.39069	51.1975		9.38985	50.8904		2.39083	33.2678		10.3904	43.1661		3.3897	39.0804		11.3905	39.9035		4.38914	44.8959		12.3902	35.9042		5.38998	33.8971		13.39	24.5624		6.39084	30.6106		14.3892	25.8567		7.39111	35.591		15.3896	39.5188		8.38977	36.9152		16.3903	35.7402
1.39236	60.905		9.39138	43.9087		2.39243	25.138		10.3916	42.8112		3.39074	40.3598		11.3915	37.1687		4.39025	51.6956		12.3917	38.5077		5.39123	33.4766		13.3916	27.4702		6.39181	29.9992		14.3902	34.5741		7.39202	38.463		15.3915	37.0464		8.39095	34.2072		16.3914	41.4513
1.39347	53.8995		9.39318	60.392		2.3934	34.5144		10.3925	35.4002		3.39157	38.472		11.3926	37.2522		4.39122	42.2744		12.3926	32.7131		5.3931	33.9895		13.3926	32.3314		6.3932	36.9271		14.391	34.6844		7.39292	39.8349		15.3928	40.1182		8.39269	45.8353		16.3924	35.8207
1.39444	54.0427		9.39437	57.0518		2.39451	42.4951		10.394	23.7095		3.39303	38.0485		11.3943	35.3674		4.39268	46.8523		12.3937	34.8663		5.39456	44.4366		13.3937	33.5213		6.39494	36.5543		14.3926	30.9923		7.39452	36.1428		15.3935	40.6998		8.39428	43.2884		16.3939	30.8462
1.3959	61.576		9.39513	47.9587		2.39624	41.7943		10.3959	30.8432		3.3947	39.6351		11.396	32.7668		4.39449	51.5494		12.3953	41.3857		5.39533	33.6615		13.3955	29.1224		6.3964	39.5486		14.3942	38.1022		7.39611	29.7278		15.3948	46.9626		8.39519	41.9822		16.3957	39.65
1.3977	60.4368		9.39652	44.5619		2.39791	42.3013		10.397	33.575		3.39588	46.4646		11.3969	31.6365		4.39581	44.9227		12.3969	37.5862		5.39644	31.4695		13.3971	27.9056		6.39737	35.0572		14.3954	38.0216		7.39723	34.2818		15.3965	37.6131		8.39616	40.3449		16.3969	33.1038
1.39902	45.7578		9.39818	46.733		2.39881	38.8656		10.3978	30.0141		3.39685	51.8268		11.3978	34.2997		4.39671	34.243		12.398	29.6532		5.3981	29.021		13.398	35.0333		6.39855	34.9469		14.3964	25.5675		7.39827	33.4825		15.3979	29.6353		8.39776	48.8683		16.3977	35.4747
1.39993	43.2139		9.3995	45.0361		2.39972	36.1219		10.3992	42.5995		3.39824	31.6961		11.3994	27.5447		4.39817	39.0654		12.399	27.7595		5.39963	35.8833		13.3989	35.2719		6.40029	35.8386		14.3979	36.4649		7.39973	29.9366		15.3989	32.9726		8.39935	48.5403		16.3991	39.823
1.40132	50.6726		9.40048	46.1723		2.40131	36.3247		10.4009	38.4511		3.40004	30.5986		11.401	26.7306		4.39997	37.5534		12.4005	30.5986		5.4006	34.8305		13.4005	33.402		6.40188	30.709		14.3996	38.2483		7.40153	28.5408		15.4001	38.6539		8.4004	45.8681		16.4007	40.9026
1.40312	55.1342		9.4018	49.2918		2.40291	41.6392		10.4022	34.9946		3.40143	42.3311		11.4021	30.1065		4.40122	38.3497		12.4023	33.4587		5.40171	31.2697		13.4021	29.4355		6.40285	34.1923		14.401	39.5516		7.40278	23.5872		15.4018	32.8622		8.40144	39.9631		16.4021	34.3086
1.40451	56.4554		9.40353	44.6155		2.40409	43.9415		10.4031	39.7156		3.40241	39.8051		11.403	33.6973		4.40206	39.6202		12.4035	32.7071		5.40338	27.0019		13.4033	39.4621		6.40397	33.6555		14.4019	41.4841		7.40375	30.7179		15.4034	36.5335		8.40296	37.1478		16.403	38.4153
1.40541	53.4999		9.40499	42.4206		2.40506	42.6949		10.4044	36.9719		3.40366	43.2437		11.4046	35.764		4.40331	48.5254		12.4044	37.1806		5.40505	30.6314		13.4043	41.1531		6.4057	35.4658		14.4032	41.2545		7.40514	30.4197		15.4044	34.7709		8.40477	40.4194		16.4043	35.7103
1.40673	45.8801		9.40596	45.6713		2.40659	46.8672		10.4061	40.8608		3.40539	38.0306		11.4063	34.9677		4.40504	56.0885		12.4058	40.4224		5.40616	35.7014		13.4057	44.6871		6.4073	37.461		14.405	42.3549		7.40688	34.0044		15.4055	31.6424		8.40602	35.5314		16.406	35.8803
1.40854	48.8057		9.40714	45.1225		2.40833	39.7394		10.4077	38.1022		3.40692	34.2967		11.4076	32.7012		4.40643	47.5323		12.4076	36.4201		5.40713	43.9207		13.4075	31.4068		6.4082	33.2231		14.4065	33.8255		7.40827	40.2315		15.4071	35.2988		8.40692	30.2557		16.4076	37.5743
1.40993	55.8201		9.40881	43.8044		2.40958	31.553		10.4086	41.5408		3.40782	36.4559		11.4085	32.0779		4.4074	45.2031		12.409	32.5908		5.40866	41.499		13.4088	23.6707		6.40917	30.4376		14.4074	35.5374		7.40917	41.7167		15.4088	45.2627		8.40831	29.4504		16.4085	34.6665
1.41076	44.0787		9.41041	38.12		2.41055	39.9601		10.4097	40.0228		3.409	43.351		11.4099	34.2013		4.40859	48.8892		12.4099	29.6115		5.41046	36.0354		13.4098	37.6429		6.41077	28.8301		14.4086	35.7849		7.41049	39.2444		15.4099	32.8503		8.41012	35.2272		16.4097	35.4777
1.41187	49.599		9.41145	46.3602		2.41187	52.3964		10.4115	37.3238		3.41081	51.958		11.4117	31.0072		4.41032	51.0932		12.4113	35.0184		5.41164	43.1244		13.4111	37.0613		6.41237	32.1405		14.4105	41.0696		7.4123	41.2425		15.4108	32.9606		8.41144	42.1074		16.4114	39.5754
1.41354	60.061		9.41249	42.5846		2.41368	46.4288		10.4131	38.8448		3.41234	40.497		11.4131	34.6248		4.41192	52.0654		12.4131	36.1815		5.41255	39.5158		13.4129	38.7762		6.41341	36.6647		14.4119	39.4144		7.41368	32.2896		15.4125	33.8374		8.41234	46.4616		16.413	39.0446
1.415	67.0635		9.41423	37.5534		2.41506	42.2416		10.4141	38.135		3.41317	37.0494		11.414	38.3825		4.41289	50.9768		12.4144	37.6429		5.41414	37.1299		13.4143	38.3974		6.41445	38.2274		14.4128	40.0586		7.41452	33.5064		15.4142	34.6635		8.41373	48.6566		16.414	30.3421
1.41604	57.6334		9.41589	42.0418		2.41597	35.5881		10.4152	36.2859		3.41421	38.7463		11.4153	32.4775		4.414	51.6866		12.4152	34.923		5.41588	37.6578		13.4152	37.2462		6.41598	29.5817		14.4139	41.1859		7.41563	33.8315		15.4153	42.8977		8.4156	40.7296		16.4151	30.8432
1.41715	53.1838		9.41687	46.5869		2.41736	37.2939		10.4169	37.8815		3.41588	44.7259		11.4171	28.9106		4.41567	57.1592		12.4165	26.3488		5.41706	41.3708		13.4165	38.5376		6.41772	31.553		14.4156	39.1728		7.4173	31.3353		15.4161	44.9913		8.41685	31.043		16.4168	32.7399
1.41882	51.0424		9.41777	46.3095		2.41916	36.4977		10.4186	41.4692		3.41741	45.4417		11.4185	33.0859		4.41734	41.2008		12.4181	30.1722		5.41789	33.6406		13.4183	36.7452		6.41897	38.627		14.4171	31.9019		7.41882	36.3008		15.4176	38.4988		8.41769	37.1418		16.4185	37.9799
1.42048	56.9474		9.41936	45.385		2.42048	32.9547		10.4195	35.2809		3.41852	38.4034		11.4193	39.5009		4.41845	37.8278		12.4195	37.1568		5.41928	32.3701		13.4197	35.7819		6.41987	39.0476		14.418	29.1761		7.4198	35.7849		15.4193	28.2724		8.41894	39.5575		16.4194	35.5314
1.42159	46.0888		9.42096	48.3643		2.42131	47.8603		10.4204	35.4151		3.41956	44.7498		11.4205	28.6363		4.41949	42.3192		12.4205	34.6606		5.42095	31.6663		13.4205	35.4867		6.42133	39.5337		14.4192	36.778		7.42091	25.7195		15.4205	33.1545		8.4206	34.2878		16.4203	32.5282
1.42257	46.6704		9.42207	41.2545		2.42249	51.9282		10.422	34.3414		3.42116	44.5201		11.4222	32.3284		4.42115	44.2398		12.4217	30.4018		5.42227	34.1893		13.4216	34.92		6.42306	35.761		14.4208	33.9508		7.42257	35.4509		15.4215	42.5041		8.42199	41.8211		16.4219	41.1859
1.42416	44.8512		9.42312	45.0182		2.42416	49.7869		10.4236	30.7597		3.42289	51.3914		11.4236	30.5002		4.42282	46.5213		12.4233	35.09		5.42324	31.2219		13.4234	31.0818		6.42445	35.6895		14.4226	31.4725		7.42424	38.97		15.4228	50.1865		8.42297	44.4485		16.4235	44.8213
1.4259	45.9397		9.42457	49.4916		2.42562	45.8681		10.4248	28.4752		3.42407	45.2329		11.4246	39.3846		4.42386	49.1308		12.425	26.9483		5.42449	39.6172		13.4248	36.104		6.42535	37.4818		14.4237	32.8145		7.42535	37.9709		15.4246	47.2907		8.42414	38.2244		16.4246	40.6998
1.42701	47.4547		9.42631	45.7488		2.42666	39.6172		10.4258	29.859		3.42497	46.7062		11.4258	41.6273		4.4247	47.5502		12.426	35.1258		5.42623	31.3323		13.4259	41.6481		6.42674	40.4373		14.4246	32.3284		7.42632	34.7739		15.426	37.7025		8.42588	42.9663		16.4256	47.5949
1.42798	49.9002		9.42763	54.4602		2.42777	40.8489		10.4272	39.8051		3.4265	47.4159		11.4274	31.9407		4.42622	35.43		12.4271	32.5491		5.42776	35.1467		13.427	32.9696		6.42855	41.3797		14.4262	31.207		7.42792	31.9049		15.4269	41.2455		8.42748	37.9083		16.4271	45.5788
1.42958	53.136		9.42853	51.0246		2.42944	45.0689		10.429	41.7495		3.42831	37.4848		11.4291	36.2472		4.42789	37.5683		12.4288	35.7402		5.42873	30.9565		13.4286	31.6723		6.42987	36.2561		14.4279	33.6943		7.42966	29.9276		15.4282	38.8209		8.42852	38.5644		16.4289	43.7268
1.43132	48.5671		9.42985	40.3717		2.43111	39.6828		10.4303	40.2584		3.42956	36.2561		11.4301	36.9778		4.42907	47.4577		12.4304	41.4274		5.42984	31.878		13.4303	33.4885		6.4307	31.878		14.4291	41.4364		7.43084	34.5621		15.43	37.795		8.42956	40.0138		16.4301	43.7596
1.4325	46.0172		9.43166	46.0172		2.43215	50.5474		10.4312	36.5901		3.43046	44.1443		11.4312	34.6606		4.43004	54.1739		12.4315	33.7599		5.43164	25.7941		13.4314	37.9978		6.43188	29.4862		14.4301	36.3068		7.43174	41.3171		15.4315	34.9498		8.43123	38.5734		16.4311	49.4916
1.43333	42.3251		9.43305	46.2558		2.43319	47.4338		10.4326	29.9366		3.43192	56.0289		11.4328	41.2992		4.4315	43.8133		12.4326	33.9537		5.43324	26.5427		13.4324	37.2164		6.43355	32.8712		14.4316	35.5314		7.43334	34.9588		15.4324	33.0113		8.43289	39.1639		16.4324	39.4979
1.43472	50.5772		9.43395	46.2439		2.43479	42.9186		10.4344	34.6039		3.43372	52.8557		11.4345	42.4981		4.43324	41.3111		12.4342	27.2256		5.43421	28.7496		13.434	38.1171		6.43501	35.6716		14.4334	37.1747		7.43514	31.8303		15.4336	31.9854		8.43401	51.0186		16.4342	38.3437
1.43639	54.0606		9.43527	43.6045		2.43652	39.5486		10.4358	34.3623		3.43497	40.7654		11.4356	39.6202		4.43463	38.5077		12.4359	22.6627		5.43532	32.7429		13.4357	38.0157		6.43598	29.1224		14.4345	42.006		7.43618	35.8475		15.4354	35.4747		8.43498	49.4409		16.4356	36.7154
1.43764	55.2773		9.43707	44.3233		2.4377	34.7083		10.4367	29.9843		3.43581	33.3692		11.4366	45.6713		4.43553	41.2336		12.4369	25.4899		5.43706	44.3233		13.4368	38.5107		6.43716	37.4788		14.4353	38.6628		7.43702	36.9569		15.4369	27.2435		8.43665	44.7736		16.4365	37.0762
1.43861	51.1826		9.43846	36.9838		2.43861	37.9411		10.438	27.5626		3.43713	39.9601		11.4382	36.2412		4.43685	44.8869		12.4378	43.527		5.43866	36.9092		13.4379	42.5876		6.43883	32.9905		14.4367	41.2753		7.43848	32.7638		15.4378	29.1194		8.43831	47.7798		16.4379	41.0189
1.43993	49.086		9.4393	43.9147		2.4402	42.0269		10.4398	31.1414		3.43879	48.1675		11.44	28.3828		4.43858	49.5155		12.4392	52.0177		5.43956	37.0673		13.4395	37.2582		6.44042	36.6975		14.4384	39.5575		7.44014	36.9182		15.4389	35.1884		8.43935	39.471		16.4397	38.0753
1.44166	62.0234		9.44041	47.1475		2.44201	40.6431		10.4412	30.8641		3.44018	39.2593		11.441	28.01		4.44004	46.053		12.441	41.0576		5.44053	41.7197		13.4412	37.6518		6.44154	40.3359		14.4397	31.4039		7.44139	31.6275		15.4405	34.5502		8.44019	36.9241		16.4411	26.3697
1.44312	65.1011		9.44214	40.2703		2.44305	41.3469		10.442	40.8429		3.44116	35.6984		11.4419	36.0593		4.44102	44.3412		12.4422	38.9342		5.44213	30.1781		13.4423	38.8865		6.44251	44.365		14.4407	37.3655		7.44236	38.2095		15.442	34.41		8.44164	39.1519		16.4419	35.1049
1.44409	57.3411		9.4436	49.432		2.44388	43.3988		10.4431	41.5199		3.44241	45.9129		11.4433	35.0542		4.44227	55.2326		12.4431	33.0322		5.44373	27.2077		13.4431	38.2632		6.44411	38.979		14.4419	38.4034		7.44368	37.4341		15.4431	32.7161		8.44338	47.1923		16.443	34.1327
1.44527	48.5641		9.44464	50.7502		2.44534	36.6527		10.4448	42.68		3.44407	45.4208		11.445	28.2396		4.44407	45.0838		12.4444	24.2403		5.44484	24.8398		13.4446	33.1932		6.44584	37.291		14.4437	39.5754		7.44542	37.449		15.4442	30.6881		8.44456	47.5472		16.4447	41.0069
1.44701	51.3973		9.44575	48.3285		2.44701	38.4034		10.4463	42.8083		3.44567	39.2832		11.4462	27.7028		4.44553	48.5641		12.4463	30.536		5.44581	30.2795		13.4462	33.3245		6.44702	32.1345		14.4452	37.5117		7.44688	36.6647		15.4457	43.4644		8.44553	44.6334		16.4462	36.2472
1.44861	53.3746		9.44742	42.4027		2.44826	39.7275		10.4473	42.3251		3.44671	37.2701		11.4472	32.901		4.44636	42.0567		12.4477	37.0613		5.44734	37.1806		13.4475	38.633		6.44799	30.1841		14.4462	30.7328		7.44785	38.1707		15.4474	39.0625		8.44692	44.4963		16.4471	43.4077
1.44958	57.1204		9.44909	38.6241		2.44923	37.291		10.4484	37.2403		3.44775	46.4735		11.4485	35.3763		4.44747	46.4169		12.4486	44.7975		5.44907	38.9968		13.4485	30.5211		6.44959	33.4169		14.4473	41.6064		7.44903	38.0037		15.4486	32.8055		8.44873	38.7284		16.4482	44.1384
1.45069	56.7059		9.45013	40.7624		2.45055	36.0324		10.4501	32.1494		3.44942	39.4472		11.4503	34.5263		4.44914	48.5969		12.4499	35.4896		5.45033	30.0022		13.4498	42.85		6.45133	38.0813		14.449	46.6912		7.45077	30.5032		15.4496	30.3302		8.45012	43.4644		16.4499	45.6862
1.45243	53.7146		9.45117	30.8491		2.45236	46.9239		10.4518	36.2889		3.45116	40.4552		11.4517	28.4394		4.45067	40.3806		12.4517	41.0218		5.4513	34.2818		13.4516	39.0147		6.45244	33.2052		14.4507	38.9104		7.45236	39.5933		15.451	29.2238		8.45102	54.9254		16.4516	36.5752
1.45409	45.9099		9.45277	37.5355		2.45381	40.9443		10.4528	37.0017		3.4522	41.5497		11.4527	34.8186		4.45171	44.0549		12.4532	38.3646		5.45269	38.299		13.4531	34.6039		6.4532	34.8842		14.4517	39.6112		7.45334	38.5406		15.4528	34.0641		8.45227	51.9521		16.4527	36.5633
1.455	44.7945		9.4545	41.9762		2.45472	40.2375		10.4538	44.5499		3.45317	39.6649		11.4539	34.6546		4.45275	40.9175		12.4541	44.3889		5.45449	35.3703		13.454	40.825		6.45466	31.6544		14.4527	42.1999		7.45445	26.9393		15.4541	35.2332		8.45401	55.6024		16.4537	41.8897
1.4559	48.0929		9.45562	40.0675		2.4559	40.4582		10.4554	39.9482		3.45484	37.7711		11.4556	38.0813		4.45435	48.6059		12.4553	43.5509		5.45581	39.0177		13.4552	41.9404		6.4564	33.402		14.4544	41.0129		7.45618	25.7434		15.455	28.9255		8.45553	50.9082		16.4553	43.7626
1.4575	52.1638		9.45659	37.8844		2.4577	37.6846		10.4571	35.928		3.45657	35.8535		11.4572	36.5126		4.45609	46.8523		12.4571	24.3507		5.45671	38.0515		13.4569	40.5745		6.45758	36.268		14.4561	37.5236		7.45778	31.3651		15.4565	31.89		8.45644	45.5997		16.457	27.831
1.45909	52.7155		9.45818	44.2249		2.45923	47.6008		10.4583	37.291		3.45754	37.6429		11.4582	33.7897		4.4572	50.8188		12.4586	30.193		5.4581	29.6592		13.4585	34.583		6.45855	34.0432		14.457	37.1597		7.45868	31.0788		15.4583	39.9244		8.45769	51.4003		16.4582	30.4346
1.4602	48.1019		9.45992	40.0973		2.4602	51.6747		10.4593	35.77		3.45838	43.3898		11.4593	36.5782		4.45817	45.3432		12.4594	35.3972		5.45991	34.4279		13.4595	34.5353		6.45994	29.6652		14.4579	40.6848		7.45966	38.4063		15.4595	36.6438		8.45949	54.317		16.4591	29.5906
1.46118	47.2847		9.46103	36.8138		2.46138	49.0294		10.4609	34.2937		3.45991	47.3205		11.4611	46.1872		4.45963	45.2717		12.4605	38.9283		5.46123	29.5727		13.4606	37.1001		6.46167	35.0483		14.4595	41.6183		7.46125	36.8943		15.4603	34.929		8.46102	51.63		16.4607	40.5745
1.4627	57.6244		9.46187	44.4306		2.46312	47.5442		10.4626	37.0166		3.46157	48.418		11.4626	32.9606		4.46143	44.1443		12.4622	37.6936		5.46206	32.4149		13.4623	39.2175		6.46306	36.9987		14.4612	38.0843		7.46278	34.8812		15.4617	41.4513		8.46185	45.2329		16.4625	37.1747
1.46451	57.3262		9.46325	40.9443		2.46472	48.9071		10.4638	32.895		3.46275	43.3719		11.4635	31.6514		4.46268	45.2836		12.4637	37.7443		5.46331	32.3343		13.4639	36.0861		6.46404	29.1701		14.4622	38.2095		7.46389	32.8712		15.4633	39.3398		8.4629	43.0886		16.4636	42.7576
1.46576	57.7079		9.46492	38.8448		2.46562	42.1223		10.4645	33.1724		3.46372	46.8702		11.4646	36.4977		4.46358	41.2575		12.4648	37.8308		5.46498	36.939		13.4648	32.5968		6.46522	40.148		14.4633	47.1953		7.46493	36.4947		15.4647	39.7096		8.46456	48.6029		16.4644	40.4463
1.46666	58.546		9.46617	42.516		2.46659	52.2563		10.4659	32.725		3.46518	43.3481		11.4662	37.7174		4.46511	40.0198		12.4658	31.1384		5.46644	42.6174		13.4658	35.2809		6.46702	40.0377		14.4648	36.5603		7.46646	42.1969		15.4657	42.2118		8.46609	52.4859		16.4658	35.6537
1.46805	57.5588		9.46714	39.6321		2.46819	48.7282		10.4676	38.4183		3.46692	42.3699		11.4677	36.3724		4.46692	45.6623		12.4674	33.2171		5.46741	33.4169		13.4675	33.059		6.46855	31.4247		14.4665	38.8358		7.4682	36.8913		15.4669	45.6534		8.46713	45.1076		16.4676	41.8241
1.46986	54.4184		9.46846	41.3171		2.46979	42.5667		10.4689	34.9826		3.46831	40.828		11.4688	32.4089		4.4681	51.281		12.4691	37.1269		5.46859	32.5849		13.469	35.9042		6.46952	29.1731		14.4678	39.1639		7.46945	39.8349		15.4686	46.9507		8.46817	42.1044		16.4688	38.9223
1.47125	49.8436		9.47027	43.4345		2.4709	47.9587		10.4699	35.4598		3.46921	35.2361		11.4699	32.737		4.46886	48.7252		12.4703	39.8856		5.47026	45.895		13.4701	33.5541		6.4707	35.9131		14.4687	34.6039		7.47035	39.3249		15.4702	40.1242		8.46977	39.8796		16.4697	37.0106
1.47215	52.7752		9.47173	41.8808		2.47187	49.6109		10.4712	35.9042		3.47053	41.7525		11.4714	27.1749		4.47025	49.9569		12.4713	31.8661		5.47185	32.7519		13.4711	39.0982		6.47244	31.3502		14.4701	30.9028		7.47181	37.1359		15.4712	29.3461		8.47144	50.6279		16.471	38.7374
1.47347	58.3134		9.47263	34.4935		2.4734	47.1237		10.4729	43.7268		3.47234	34.7709		11.4731	31.3353		4.47192	50.8605		12.4727	38.7523		5.47296	36.6438		13.4727	35.5731		6.47404	34.8991		14.4719	41.5795		7.47355	36.7005		15.4722	28.6542		8.47262	45.5699		16.4728	44.2099
1.47527	60.6962		9.47381	30.9655		2.4752	37.8904		10.4744	39.7424		3.47373	34.8246		11.4744	38.4421		4.47324	52.3994		12.4745	43.6045		5.47394	31.5619		13.4744	32.1435		6.47487	31.3889		14.4733	43.6821		7.47487	30.0588		15.474	39.3816		8.47359	48.4299		16.4743	35.7938
1.47666	57.2039		9.47554	35.5851		2.47645	35.6716		10.4754	36.8347		3.4747	39.1251		11.4753	42.8411		4.47421	50.5742		12.4758	34.0701		5.47553	29.2387		13.4757	33.411		6.47584	34.3593		14.4742	34.8455		7.47577	33.4825		15.4756	37.0375		8.47505	50.8158		16.4752	32.2479
1.4775	47.8543		9.47707	36.3038		2.47736	33.7659		10.4766	37.8367		3.47595	40.497		11.4767	34.2818		4.47546	38.8537		12.4767	37.0345		5.47727	39.316		13.4766	36.4231		6.47751	39.8438		14.4755	35.9012		7.47716	32.3582		15.4767	28.4693		8.47685	43.6791		16.4764	29.4415
1.47868	58.5102		9.47805	40.8548		2.47881	46.3006		10.4782	33.572		3.47775	42.0299		11.4785	33.9776		4.4772	32.561		12.4781	36.5275		5.47838	33.7718		13.478	36.3456		6.47904	31.0579		14.4774	39.1937		7.47903	33.5183		15.4777	29.8202		8.4781	43.9773		16.4782	35.6656
1.48034	61.3136		9.47923	39.8051		2.48062	40.834		10.4798	35.5851		3.47921	37.3596		11.4798	40.318		4.47879	47.2698		12.48	36.4052		5.47935	33.3453		13.4798	40.151		6.48008	29.2954		14.4787	31.0877		7.48035	36.6468		15.4794	36.4768		8.47901	48.3792		16.4797	42.3013
1.48173	57.0667		9.48096	36.1398		2.48194	49.0622		10.4808	39.4531		3.48004	35.1437		11.4807	43.8849		4.47977	43.8461		12.4813	33.8911		5.48095	43.5717		13.4811	30.4107		6.48112	32.7399		14.4796	37.5027		7.48111	35.8803		15.481	31.3889		8.48046	52.5247		16.4807	34.8007
1.48277	53.5446		9.48256	38.7225		2.48277	45.2717		10.4819	30.0618		3.48116	38.2781		11.4821	39.814		4.48088	44.3531		12.482	28.0279		5.48269	40.6312		13.482	34.3623		6.48272	41.8957		14.4808	40.8847		7.4823	34.2162		15.482	29.5757		8.48227	54.4721		16.4818	38.0455
1.48389	57.8392		9.48346	40.6699		2.48416	49.4618		10.4836	28.4573		3.48282	36.8377		11.484	42.5279		4.48261	48.3494		12.4833	30.879		5.4838	34.5055		13.4834	30.9535		6.48445	39.5724		14.4824	37.7383		7.48403	32.7012		15.4829	30.026		8.48352	55.0239		16.4836	34.3802
1.48555	59.9894		9.48443	35.9937		2.48604	42.7993		10.4853	35.3077		3.48435	40.488		11.4853	36.6199		4.48421	44.2338		12.485	36.4231		5.48463	27.0318		13.4852	26.5785		6.48563	34.5562		14.4839	39.4979		7.48549	30.1095		15.4844	31.7796		8.48428	54.1441		16.4852	33.6466
1.48722	55.9842		9.48603	42.3788		2.48736	35.433		10.4862	41.4364		3.48539	47.7291		11.486	35.087		4.48525	42.8679		12.4863	37.8069		5.48609	31.5798		13.4866	30.1662		6.48661	32.9994		14.4849	40.1868		7.48639	32.224		15.4861	35.8296		8.48553	40.6133		16.4861	39.0625
1.48826	45.212		9.48763	41.4066		2.48812	45.8085		10.4871	31.5888		3.48643	43.196		11.4873	34.0134		4.48629	39.4502		12.4873	35.2421		5.48782	38.0843		13.4873	45.1166		6.48806	30.4257		14.486	51.0902		7.48757	44.3143		15.4873	33.915		8.48727	46.0918		16.4871	39.4949
1.4893	52.2563		9.48867	39.8349		2.48937	47.4398		10.4887	27.0705		3.48803	37.115		11.489	42.0985		4.48803	39.5486		12.4885	36.0712		5.48901	38.0067		13.4886	36.6498		6.4898	31.6812		14.4878	39.2056		7.48924	37.1538		15.4883	39.0267		8.48859	52.0326		16.4887	44.4068
1.4909	40.9473		9.48971	40.9264		2.49104	46.2469		10.4904	33.8553		3.48977	38.1051		11.4903	36.0861		4.4897	36.9033		12.4902	38.6956		5.48998	33.4676		13.4903	30.6434		6.49112	30.539		14.4894	38.4749		7.49091	36.1666		15.4897	36.1517		8.48956	53.4402		16.4902	47.1505
1.49264	43.8193		9.49124	35.8416		2.49243	41.842		10.4914	38.1648		3.49088	41.1739		11.4913	36.107		4.49067	43.7537		12.4918	34.0372		5.49137	31.2398		13.4917	28.4186		6.49209	36.1308		14.4905	45.8115		7.49195	40.6998		15.4915	29.188		8.49081	51.4123		16.4913	46.3751
1.49382	54.0486		9.49298	38.5435		2.4934	44.714		10.4925	29.5429		3.49185	38.8955		11.4926	32.0898		4.49157	49.1517		12.4928	32.9219		5.4931	35.2809		13.4927	26.7872		6.49348	34.7798		14.4915	36.0235		7.49299	36.7064		15.4928	34.6248		8.49248	44.8034		16.4923	38.0365
1.49472	62.092		9.49423	38.3974		2.49458	40.8757		10.494	31.2279		3.49338	51.0395		11.4942	31.5172		4.49317	44.4813		12.494	39.6977		5.49456	33.8404		13.4939	32.3701		6.49529	41.4811		14.4931	42.2655		7.49459	33.2708		15.4937	36.3307		8.49408	50.6637		16.4939	41.4095
1.49632	59.9089		9.49513	38.0664		2.49631	41.4215		10.4957	37.792		3.49518	51.0514		11.4958	40.9085		4.49477	46.0262		12.4956	38.5286		5.49546	33.6466		13.4956	41.9971		6.4966	39.1639		14.4949	46.4765		7.49632	27.1809		15.495	36.8526		8.49512	61.9846		16.4956	40.9622
1.49812	62.3783		9.49659	54.9344		2.49791	45.7041		10.497	40.0675		3.49636	41.1203		11.4969	34.4816		4.49595	51.2423		12.4973	34.1834		5.49664	29.6771		13.4972	43.0647		6.49737	41.8271		14.496	43.3988		7.49743	38.8209		15.4968	36.2412		8.49616	60.0908		16.4969	45.2329
1.49916	51.7582		9.49832	45.5073		2.49895	50.944		10.4979	38.9968		3.49734	40.2703		11.4979	35.8684		4.49692	42.7486		12.4984	35.3554		5.49845	36.6587		13.4982	39.1639		6.49862	35.096		14.4969	33.4318		7.49841	40.5536		15.4983	43.1691		8.4979	58.9874		16.4978	43.8879
1.5	45.5908		9.49964	37.0554		2.49999	51.0872		10.4993	40.9026		3.49879	40.5327		11.4996	31.8273		4.49845	39.7901		12.4994	39.2235		5.49998	28.5528		13.4993	31.8572					14.4985	42.4623					15.4992	34.1804		8.49956	54.6302		16.4992	33.2231
