# Supplementary material for: Binding and sequestration of poison frog alkaloids by a plasma globulin
Source: eLife journal article supplement (doi:10.7554/elife.85096), 2023-12-14
Supplement: fig5-data1 [file OsABG+PTX_R3 analysis_CapillaryShapeRawData.xlsx]

## Sheet: RawData
NanoTemper Technologies	NanoTemper Technologies
MO.Affinity Analysis v3.0.5	MO.Affinity Analysis v3.0.5
Origin of exported data	Origin of exported data
Project Title:	20230407_BSA+PTX
Comment:
Project File Path:	C:\Users\nanotemper\Desktop\Aurora_MST\20230407_BSA\BSA+PTX analysis.nta3
Analysis-Set Name:	OsABG+PTX
Exported from:	Capillary Shape (Raw Data Inspection)
Exported on:	2023-04-11 08:23:27
Sample Information	Sample Information		Sample Information	Sample Information		Sample Information	Sample Information		Sample Information	Sample Information		Sample Information	Sample Information		Sample Information	Sample Information		Sample Information	Sample Information		Sample Information	Sample Information		Sample Information	Sample Information		Sample Information	Sample Information		Sample Information	Sample Information		Sample Information	Sample Information		Sample Information	Sample Information		Sample Information	Sample Information		Sample Information	Sample Information		Sample Information	Sample Information
Merge-Set Name:	OsABG+PTX_R3 (#22)		Merge-Set Name:	OsABG+PTX_R3 (#22)		Merge-Set Name:	OsABG+PTX_R3 (#22)		Merge-Set Name:	OsABG+PTX_R3 (#22)		Merge-Set Name:	OsABG+PTX_R3 (#22)		Merge-Set Name:	OsABG+PTX_R3 (#22)		Merge-Set Name:	OsABG+PTX_R3 (#22)		Merge-Set Name:	OsABG+PTX_R3 (#22)		Merge-Set Name:	OsABG+PTX_R3 (#22)		Merge-Set Name:	OsABG+PTX_R3 (#22)		Merge-Set Name:	OsABG+PTX_R3 (#22)		Merge-Set Name:	OsABG+PTX_R3 (#22)		Merge-Set Name:	OsABG+PTX_R3 (#22)		Merge-Set Name:	OsABG+PTX_R3 (#22)		Merge-Set Name:	OsABG+PTX_R3 (#22)		Merge-Set Name:	OsABG+PTX_R3 (#22)
Run Name:	OsABG+PTX_R3 (#22)		Run Name:	OsABG+PTX_R3 (#22)		Run Name:	OsABG+PTX_R3 (#22)		Run Name:	OsABG+PTX_R3 (#22)		Run Name:	OsABG+PTX_R3 (#22)		Run Name:	OsABG+PTX_R3 (#22)		Run Name:	OsABG+PTX_R3 (#22)		Run Name:	OsABG+PTX_R3 (#22)		Run Name:	OsABG+PTX_R3 (#22)		Run Name:	OsABG+PTX_R3 (#22)		Run Name:	OsABG+PTX_R3 (#22)		Run Name:	OsABG+PTX_R3 (#22)		Run Name:	OsABG+PTX_R3 (#22)		Run Name:	OsABG+PTX_R3 (#22)		Run Name:	OsABG+PTX_R3 (#22)		Run Name:	OsABG+PTX_R3 (#22)
Date of Measurement:	2023-04-11 08:11:00		Date of Measurement:	2023-04-11 08:11:27		Date of Measurement:	2023-04-11 08:11:54		Date of Measurement:	2023-04-11 08:12:20		Date of Measurement:	2023-04-11 08:12:47		Date of Measurement:	2023-04-11 08:13:13		Date of Measurement:	2023-04-11 08:13:40		Date of Measurement:	2023-04-11 08:14:07		Date of Measurement:	2023-04-11 08:14:34		Date of Measurement:	2023-04-11 08:15:00		Date of Measurement:	2023-04-11 08:15:27		Date of Measurement:	2023-04-11 08:15:54		Date of Measurement:	2023-04-11 08:16:21		Date of Measurement:	2023-04-11 08:16:47		Date of Measurement:	2023-04-11 08:17:14		Date of Measurement:	2023-04-11 08:17:40
Capillary Type:	Monolith Premium Capillary		Capillary Type:	Monolith Premium Capillary		Capillary Type:	Monolith Premium Capillary		Capillary Type:	Monolith Premium Capillary		Capillary Type:	Monolith Premium Capillary		Capillary Type:	Monolith Premium Capillary		Capillary Type:	Monolith Premium Capillary		Capillary Type:	Monolith Premium Capillary		Capillary Type:	Monolith Premium Capillary		Capillary Type:	Monolith Premium Capillary		Capillary Type:	Monolith Premium Capillary		Capillary Type:	Monolith Premium Capillary		Capillary Type:	Monolith Premium Capillary		Capillary Type:	Monolith Premium Capillary		Capillary Type:	Monolith Premium Capillary		Capillary Type:	Monolith Premium Capillary
Capillary Position:	1		Capillary Position:	9		Capillary Position:	2		Capillary Position:	10		Capillary Position:	3		Capillary Position:	11		Capillary Position:	4		Capillary Position:	12		Capillary Position:	5		Capillary Position:	13		Capillary Position:	6		Capillary Position:	14		Capillary Position:	7		Capillary Position:	15		Capillary Position:	8		Capillary Position:	16
Ligand:	PTX		Ligand:	PTX		Ligand:	PTX		Ligand:	PTX		Ligand:	PTX		Ligand:	PTX		Ligand:	PTX		Ligand:	PTX		Ligand:	PTX		Ligand:	PTX		Ligand:	PTX		Ligand:	PTX		Ligand:	PTX		Ligand:	PTX		Ligand:	PTX		Ligand:	PTX
Ligand Concentration:	0.001		Ligand Concentration:	3.90625e-06		Ligand Concentration:	0.0005		Ligand Concentration:	1.95313e-06		Ligand Concentration:	0.00025		Ligand Concentration:	9.76563e-07		Ligand Concentration:	0.000125		Ligand Concentration:	4.88281e-07		Ligand Concentration:	6.25e-05		Ligand Concentration:	2.44141e-07		Ligand Concentration:	3.125e-05		Ligand Concentration:	1.2207e-07		Ligand Concentration:	1.5625e-05		Ligand Concentration:	6.10352e-08		Ligand Concentration:	7.8125e-06		Ligand Concentration:	3.05176e-08
Target:	OsABG		Target:	OsABG		Target:	OsABG		Target:	OsABG		Target:	OsABG		Target:	OsABG		Target:	OsABG		Target:	OsABG		Target:	OsABG		Target:	OsABG		Target:	OsABG		Target:	OsABG		Target:	OsABG		Target:	OsABG		Target:	OsABG		Target:	OsABG
TargetConcentration:	5e-09		TargetConcentration:	5e-09		TargetConcentration:	5e-09		TargetConcentration:	5e-09		TargetConcentration:	5e-09		TargetConcentration:	5e-09		TargetConcentration:	5e-09		TargetConcentration:	5e-09		TargetConcentration:	5e-09		TargetConcentration:	5e-09		TargetConcentration:	5e-09		TargetConcentration:	5e-09		TargetConcentration:	5e-09		TargetConcentration:	5e-09		TargetConcentration:	5e-09		TargetConcentration:	5e-09
Measurement Settings	Measurement Settings		Measurement Settings	Measurement Settings		Measurement Settings	Measurement Settings		Measurement Settings	Measurement Settings		Measurement Settings	Measurement Settings		Measurement Settings	Measurement Settings		Measurement Settings	Measurement Settings		Measurement Settings	Measurement Settings		Measurement Settings	Measurement Settings		Measurement Settings	Measurement Settings		Measurement Settings	Measurement Settings		Measurement Settings	Measurement Settings		Measurement Settings	Measurement Settings		Measurement Settings	Measurement Settings		Measurement Settings	Measurement Settings		Measurement Settings	Measurement Settings
MST-Power:	Medium		MST-Power:	Medium		MST-Power:	Medium		MST-Power:	Medium		MST-Power:	Medium		MST-Power:	Medium		MST-Power:	Medium		MST-Power:	Medium		MST-Power:	Medium		MST-Power:	Medium		MST-Power:	Medium		MST-Power:	Medium		MST-Power:	Medium		MST-Power:	Medium		MST-Power:	Medium		MST-Power:	Medium
Excitation-Power:	15		Excitation-Power:	15		Excitation-Power:	15		Excitation-Power:	15		Excitation-Power:	15		Excitation-Power:	15		Excitation-Power:	15		Excitation-Power:	15		Excitation-Power:	15		Excitation-Power:	15		Excitation-Power:	15		Excitation-Power:	15		Excitation-Power:	15		Excitation-Power:	15		Excitation-Power:	15		Excitation-Power:	15
Excitation type:	Pico - RED		Excitation type:	Pico - RED		Excitation type:	Pico - RED		Excitation type:	Pico - RED		Excitation type:	Pico - RED		Excitation type:	Pico - RED		Excitation type:	Pico - RED		Excitation type:	Pico - RED		Excitation type:	Pico - RED		Excitation type:	Pico - RED		Excitation type:	Pico - RED		Excitation type:	Pico - RED		Excitation type:	Pico - RED		Excitation type:	Pico - RED		Excitation type:	Pico - RED		Excitation type:	Pico - RED
Thermostat Setpoint:	25		Thermostat Setpoint:	25		Thermostat Setpoint:	25		Thermostat Setpoint:	25		Thermostat Setpoint:	25		Thermostat Setpoint:	25		Thermostat Setpoint:	25		Thermostat Setpoint:	25		Thermostat Setpoint:	25		Thermostat Setpoint:	25		Thermostat Setpoint:	25		Thermostat Setpoint:	25		Thermostat Setpoint:	25		Thermostat Setpoint:	25		Thermostat Setpoint:	25		Thermostat Setpoint:	25
Included	Included		Included	Included		Included	Included		Included	Included		Included	Included		Included	Included		Included	Included		Included	Included		Included	Included		Included	Included		Included	Included		Included	Included		Included	Included		Included	Included		Included	Included		Included	Included
Position [mm]	Relative Fluorescence [-]		Position [mm]	Relative Fluorescence [-]		Position [mm]	Relative Fluorescence [-]		Position [mm]	Relative Fluorescence [-]		Position [mm]	Relative Fluorescence [-]		Position [mm]	Relative Fluorescence [-]		Position [mm]	Relative Fluorescence [-]		Position [mm]	Relative Fluorescence [-]		Position [mm]	Relative Fluorescence [-]		Position [mm]	Relative Fluorescence [-]		Position [mm]	Relative Fluorescence [-]		Position [mm]	Relative Fluorescence [-]		Position [mm]	Relative Fluorescence [-]		Position [mm]	Relative Fluorescence [-]		Position [mm]	Relative Fluorescence [-]		Position [mm]	Relative Fluorescence [-]
-2.2447	0.00454492		-2.24848	0.0016924		-2.24377	0.00311881		-2.24678	0.00148759		-2.24761	0.00151688		-2.24566	0.00138433		-2.24918	0.00103023		-2.24625	0.000912838		-2.24479	0.00209572		-2.2464	0.00054317		-2.24247	0.00118892		-2.24878	0.00118585		-2.24279	0.00132974		-2.24753	0.000767894		-2.24853	0.000885592		-2.24602	0.00137486
-2.2372	0.0049178		-2.24286	0.00216862		-2.23596	0.00301428		-2.24052	0.00161582		-2.24199	0.00107486		-2.24035	0.00109361		-2.24293	0.000668801		-2.23843	0.00103508		-2.2401	0.00203803		-2.23858	0.000682472		-2.23809	0.00132954		-2.24347	0.000653174		-2.2378	0.0013745		-2.2394	0.00083875		-2.24416	0.00116951		-2.23976	0.00112886
-2.23127	0.00436054		-2.23473	0.00215216		-2.23065	0.00215267		-2.23646	0.0011936		-2.23855	0.000808122		-2.23597	0.000611263		-2.23887	0.000458316		-2.23375	0.000965951		-2.23229	0.000802742		-2.23327	0.00102587		-2.23309	0.000933396		-2.24003	0.000872204		-2.23404	0.000971709		-2.23253	0.000692983		-2.23697	0.0016529		-2.23571	0.00112508
-2.22689	0.00310938		-2.22817	0.00236274		-2.22627	0.00292299		-2.23053	0.00114713		-2.23293	0.00109305		-2.22879	0.00101183		-2.23324	0.000119084		-2.23	0.00102939		-2.22479	0.00141456		-2.2289	0.000699534		-2.22559	0.00108284		-2.23378	0.000864156		-2.2278	0.000175269		-2.22877	0.000761918		-2.22884	0.00112936		-2.22977	0.00135198
-2.22095	0.00445947		-2.22442	0.00241485		-2.21909	0.00274148		-2.2224	0.000918378		-2.22511	0.00166421		-2.22097	0.00160424		-2.22512	0.000260626		-2.22343	0.00100789		-2.22072	0.00239839		-2.22202	0.000814215		-2.21809	0.00158873		-2.22628	0.000801514		-2.2203	0.00124422		-2.22409	0.000535263		-2.22416	0.00106956		-2.22164	0.000983326
-2.21314	0.00484789		-2.21942	0.00135312		-2.21128	0.00202087		-2.21584	0.0012843		-2.21886	0.00165947		-2.21597	0.00196819		-2.21856	0.00103833		-2.21593	0.0011704		-2.21635	0.00263769		-2.21421	0.00126711		-2.2134	0.00127197		-2.22035	0.000596187		-2.21436	0.00157742		-2.21659	0.00138703		-2.22041	0.0012998		-2.21508	0.000759253
-2.20658	0.00397189		-2.21192	0.0016943		-2.20627	0.00259482		-2.2124	0.001925		-2.21449	0.00150528		-2.21222	0.00118898		-2.21418	0.000785274		-2.21031	0.000417111		-2.20947	0.00156021		-2.20889	0.00115977		-2.20871	0.00119872		-2.21598	0.000727127		-2.20998	0.00168169		-2.20972	0.00121203		-2.21385	0.000928147		-2.21164	0.000643207
-2.2022	0.00394448		-2.20504	0.00230535		-2.20252	0.00249029		-2.2074	0.00221876		-2.20918	0.00146205		-2.20597	0.000554916		-2.20856	0.000192728		-2.20593	0.000409523		-2.20229	0.00209028		-2.20546	0.0007775		-2.20153	0.00149466		-2.21035	0.000449805		-2.20436	0.00118213		-2.20471	0.00195687		-2.20635	0.000922037		-2.20633	0.00151945
-2.19689	0.00481796		-2.20067	0.00170696		-2.19627	0.00169135		-2.19959	0.00139019		-2.20136	0.00121271		-2.19847	0.00104099		-2.20043	0.000394857		-2.2	0.00115944		-2.19697	0.0022217		-2.19921	0.00107057		-2.19371	0.00173058		-2.20253	0.000236865		-2.19655	0.0010338		-2.20003	0.00166256		-2.20104	0.000876426		-2.19883	0.00133453
-2.18939	0.00458491		-2.19567	0.00109655		-2.18846	0.00242898		-2.19302	0.0015345		-2.19417	0.00163338		-2.19253	0.000996481		-2.19387	0.000601164		-2.19187	0.000966584		-2.19229	0.00216686		-2.1914	0.00172972		-2.18871	0.00142753		-2.19566	0.000817392		-2.18967	0.00160179		-2.19315	0.000459071		-2.19666	0.000909161		-2.19196	0.00152511
-2.1822	0.00410578		-2.18848	0.00188884		-2.18284	0.00232986		-2.18834	0.001121		-2.1898	0.00121851		-2.18816	0.000372063		-2.19012	0.000995499		-2.18562	0.00106038		-2.18572	0.00165386		-2.18577	0.00125977		-2.18434	0.000953485		-2.19129	0.000838925		-2.18561	0.0014066		-2.18503	0.00044648		-2.19041	0.000924656		-2.18758	0.00144845
-2.17752	0.00289758		-2.18067	0.00183672		-2.17846	0.00238198		-2.18334	0.00134998		-2.1848	0.000985508		-2.18222	0.000510847		-2.18543	0.00149455		-2.18125	0.00112276		-2.17791	0.00178761		-2.18139	0.00157638		-2.17715	0.000948096		-2.18597	0.00060815		-2.18029	0.0013895		-2.17971	0.000899148		-2.18228	0.0013956		-2.18258	0.000897942
-2.17283	0.00296955		-2.17567	0.00121028		-2.17252	0.00283953		-2.17615	0.00133925		-2.1773	0.00147049		-2.17441	0.00118021		-2.17793	0.00120233		-2.17593	0.00151247		-2.17197	0.00202302		-2.17546	0.000901468		-2.16934	0.000680816		-2.17816	0.000593142		-2.17248	0.000951793		-2.17565	0.00171762		-2.17603	0.000294397		-2.17508	0.0013593
-2.16502	0.0036093		-2.17129	0.00168206		-2.16471	0.00247328		-2.16834	0.00112859		-2.1698	0.00138931		-2.16785	0.000374037		-2.17074	0.00152511		-2.16781	0.00157802		-2.16791	0.00189807		-2.16765	0.000376655		-2.16403	0.000104364		-2.17097	0.000105056		-2.16498	0.00140074		-2.16909	0.00170524		-2.17166	0.000290251		-2.16758	0.00133028
-2.15752	0.00370594		-2.16442	0.00209435		-2.15815	0.00209406		-2.16334	0.00136226		-2.1648	0.00135188		-2.16347	0.000392015		-2.16605	0.00127963		-2.16093	0.000581088		-2.16166	0.00202354		-2.16108	0.00102565		-2.16028	0.000562733		-2.16629	0.000760623		-2.16092	0.00100943		-2.16096	0.000581362		-2.16634	0.000640734		-2.16258	0.00126566
-2.15314	0.00392186		-2.1563	0.000682151		-2.15409	0.00191229		-2.15896	0.00103745		-2.16043	0.000746973		-2.15816	0.000588242		-2.16137	0.00117752		-2.15656	0.000609753		-2.15354	0.00200647		-2.15671	0.00136149		-2.15403	0.000898608		-2.1616	0.000882209		-2.15592	0.00129717		-2.15534	0.00124276		-2.15822	0.000948661		-2.15789	0.00144397
-2.14908	0.00450265		-2.15098	0.00123517		-2.14878	0.00242979		-2.15209	0.001692		-2.15293	0.00115051		-2.15066	0.000937284		-2.15418	0.000540317		-2.15156	0.00116302		-2.14729	0.00195188		-2.1514	0.00106258		-2.14621	0.00125629		-2.15409	0.000737567		-2.14811	0.00183282		-2.15127	0.000814846		-2.15135	0.000446069		-2.15102	0.0013659
-2.14189	0.00427372		-2.14692	0.00195678		-2.14065	0.00308343		-2.14396	0.00127335		-2.14511	0.00159173		-2.14347	0.000902862		-2.14637	0.000604559		-2.14343	0.000928645		-2.14322	0.00235105		-2.14358	0.0014861		-2.14059	0.00159363		-2.14659	0.000439365		-2.14061	0.00144995		-2.14471	0.000990066		-2.14728	0.000952153		-2.14321	0.00129443
-2.1347	0.00358599		-2.14004	0.00203443		-2.13346	0.00188095		-2.13865	0.00153651		-2.14043	0.00148498		-2.1391	0.000655551		-2.14137	0.0012812		-2.13625	0.00111222		-2.13729	0.00285784		-2.1364	0.00118353		-2.13622	0.000625449		-2.14222	0.000754967		-2.13654	0.000924846		-2.13659	0.00147966		-2.14197	0.000746577		-2.1379	0.000964928
-2.1297	0.00452482		-2.13192	0.00150335		-2.12909	0.0017505		-2.13459	0.00121795		-2.13668	0.00158936		-2.13378	0.000905493		-2.13699	0.00135954		-2.1325	0.0013681		-2.12916	0.0022931		-2.13202	0.00112457		-2.13028	8.13353e-05		-2.13816	0.000204239		-2.13248	0.000581807		-2.13097	0.00155222		-2.13385	0.00111867		-2.13352	0.00123759
-2.12533	0.00453533		-2.12692	0.00221124		-2.12409	0.00204896		-2.12771	0.00146771		-2.1298	0.00149395		-2.12597	0.00101051		-2.13043	0.00121774		-2.12781	0.00113225		-2.12322	0.00220489		-2.12702	0.000835596		-2.12246	0.000678121		-2.13097	0.00112081		-2.12529	0.00117814		-2.12721	0.00137529		-2.12666	0.000687218		-2.12664	0.000603345
-2.11845	0.00547963		-2.12317	0.00247393		-2.11627	0.00253081		-2.11959	0.00160353		-2.12261	0.00199658		-2.11878	0.000996481		-2.12231	0.00110048		-2.12062	0.00101611		-2.11947	0.00164946		-2.11921	0.000739921		-2.11559	0.00103899		-2.12378	0.00143272		-2.11779	0.000682329		-2.12159	0.000792437		-2.12291	0.000571117		-2.11821	0.000730949
-2.11064	0.00511726		-2.11692	0.00207557		-2.10909	0.00204301		-2.11428	0.00137165		-2.1173	0.000902482		-2.11472	0.0012576		-2.11668	0.000653655		-2.11343	0.000781107		-2.11416	0.00193507		-2.11171	0.000993904		-2.11153	0.000873375		-2.11847	0.000775196		-2.1128	0.000555095		-2.11378	0.000731825		-2.11854	0.000753779		-2.11321	0.00157299
-2.10502	0.00388462		-2.10942	0.00140313		-2.10502	0.00207326		-2.11084	0.00138148		-2.11293	0.000756198		-2.11035	0.00115609		-2.11262	0.000355423		-2.10843	0.000575608		-2.10666	0.00179278		-2.10765	0.00105718		-2.10621	0.00106177		-2.1141	0.000690803		-2.10842	0.000891573		-2.10753	0.000774083		-2.11104	0.000498882		-2.10945	0.0017322
-2.10095	0.00306026		-2.10348	0.00173228		-2.10065	0.00267828		-2.10459	0.00054218		-2.10636	0.000678443		-2.10316	0.000793677		-2.10574	0.000634069		-2.10406	0.000662023		-2.09979	0.00169085		-2.10358	0.000514662		-2.09809	0.00121097		-2.10753	0.000726039		-2.10154	0.00109894		-2.10315	0.000994762		-2.10416	0.00112019		-2.10321	0.00103404
-2.0947	0.0035355		-2.09911	0.00121956		-2.09346	0.00257213		-2.09709	0.0009014		-2.09855	0.00115973		-2.09597	0.000957016		-2.09762	0.000664101		-2.09718	0.00142205		-2.0951	0.00215677		-2.0964	0.00109109		-2.09121	0.000864555		-2.09972	0.000943546		-2.09373	0.0019788		-2.09753	0.00086436		-2.09947	0.000883628		-2.09571	0.00134208
-2.08658	0.00371485		-2.09348	0.00142169		-2.08628	0.00220615		-2.09115	0.00082969		-2.0923	0.00189669		-2.09097	0.00101731		-2.09199	0.000968861		-2.08937	0.00124564		-2.0901	0.00270288		-2.08921	0.00104509		-2.08684	0.000582822		-2.09378	0.00128134		-2.08811	0.00151673		-2.09003	0.00107778		-2.09478	0.000491462		-2.08977	0.00113711
-2.08064	0.00301959		-2.08567	0.00189348		-2.08127	0.00177643		-2.08678	0.00115272		-2.08793	0.0019552		-2.0866	0.00118262		-2.08855	0.00139923		-2.08375	0.00092991		-2.0826	0.00116751		-2.08421	0.0013954		-2.08153	0.00115143		-2.08941	0.000873726		-2.08373	0.0010802		-2.08284	0.000933082		-2.08791	0.000598397		-2.08539	0.000311107
-2.07658	0.00334426		-2.0788	0.00248301		-2.07659	0.00187798		-2.08084	0.00131915		-2.0823	0.00124487		-2.07972	0.001335		-2.08262	0.00100777		-2.07969	0.000950776		-2.0751	0.00124744		-2.07952	0.000717028		-2.07372	0.00156081		-2.08348	0.00097987		-2.07748	0.000832994		-2.07815	0.00106114		-2.0801	0.000829724		-2.07946	0.000330684
-2.07033	0.00385857		-2.07442	0.0019361		-2.06971	0.003501		-2.07302	0.00105264		-2.07449	0.00122536		-2.07191	0.0010844		-2.07512	0.000487565		-2.07312	0.00104204		-2.0701	0.00153279		-2.07265	0.000922201		-2.06653	0.00119161		-2.07535	0.000639689		-2.06936	0.00113714		-2.07346	0.00102742		-2.07447	0.000164548		-2.07164	0
-2.0622	0.00380967		-2.06911	0.00125269		-2.0619	0.00305939		-2.06646	0.000958142		-2.06761	0.0011057		-2.06628	0.00106489		-2.06918	0.00109865		-2.06499	0.000821364		-2.06573	0.00170224		-2.06484	0.000857842		-2.06247	0.00134007		-2.06909	0.000361932		-2.06342	0.001804		-2.06596	0.00104193		-2.07041	0.000205576		-2.06508	0.000429984
-2.05595	0.00428445		-2.06129	0.00122884		-2.05627	0.00218454		-2.06209	0.00169892		-2.06355	0.00049394		-2.06191	0.000875018		-2.0648	0.00166926		-2.05906	0.00100832		-2.05854	0.0021578		-2.05921	0.00102846		-2.05809	0.00128667		-2.06504	0.00068754		-2.05936	0.00186164		-2.05815	0.00105772		-2.06385	0.000549731		-2.0607	0.00143076
-2.0522	0.00390129		-2.05411	0.00145904		-2.05221	0.00261346		-2.05677	0.00137589		-2.05793	0.000752771		-2.05566	0.000633626		-2.05918	0.00166587		-2.055	0.000568231		-2.05072	0.00210606		-2.05483	0.00170424		-2.05059	0.00137168		-2.0591	0.00119933		-2.05311	0.00120392		-2.05347	0.000797132		-2.05572	0.000487097		-2.05539	0.00123099
-2.0472	0.00393488		-2.04973	0.00147866		-2.04596	0.00264695		-2.04896	0.00117528		-2.0498	0.00110412		-2.04785	0.000663224		-2.05137	0.00112189		-2.04875	0.000930753		-2.04541	0.00157547		-2.0489	0.0018593		-2.0434	0.000897628		-2.05097	0.00181053		-2.04498	0.000587899		-2.04909	0.00125535		-2.04978	0		-2.04758	0.00065901
-2.03939	0.00459724		-2.04473	0.00135206		-2.03784	0.00244654		-2.04177	0.00066259		-2.04324	0.00128203		-2.04191	0.000724175		-2.04418	0.00100464		-2.04031	0.0015072		-2.04135	0.00108239		-2.04077	0.00144248		-2.03872	0.000446364		-2.04472	0.000894607		-2.03904	0.000788005		-2.04159	0.00157527		-2.04572	0.000272574		-2.04039	0.000700758
-2.03283	0.00425407		-2.03692	0.00180191		-2.03159	0.00203059		-2.0374	0.00132853		-2.03949	0.00159727		-2.03785	0.00036132		-2.0398	0.00115219		-2.03468	0.00128505		-2.03416	0.00161712		-2.03452	0.000815511		-2.03403	0.000951035		-2.04097	0.00114518		-2.03529	0.000955073		-2.03377	0.00148499		-2.03916	0.000334116		-2.03602	0.000947474
-2.02814	0.0031336		-2.02973	0.00159492		-2.02784	0.00215834		-2.03271	0.00146212		-2.03449	0.00126015		-2.0316	0.000587803		-2.03481	0.00102579		-2.03125	0.000934547		-2.02604	0.00159927		-2.03046	0.000902332		-2.02715	0.00088146		-2.03598	0.00108819		-2.02998	0.000808391		-2.02909	0.00101738		-2.03103	0.000447815		-2.03102	0.000933558
-2.02314	0.00347084		-2.02567	0.00181457		-2.02159	0.00200007		-2.0249	0.000924633		-2.02699	0.00129679		-2.02316	0.000200392		-2.0273	0.000454398		-2.02562	0.000302874		-2.02135	0.001844		-2.02452	0.000839052		-2.01934	0.00159412		-2.02816	0.00105208		-2.02248	0		-2.02534	0.000994548		-2.02541	0.00104578		-2.0232	0.000896055
-2.01564	0.0042038		-2.02129	0.00230598		-2.01315	0.00228988		-2.0174	0.00117774		-2.02011	0.000681869		-2.01722	0.000271648		-2.0198	0.00120076		-2.01781	0.00035662		-2.0176	0.00213944		-2.01608	0.000977922		-2.01371	0.00130014		-2.02159	0.000982045		-2.01592	0.000848693		-2.01846	0.000800547		-2.02166	0.000335207		-2.0157	0.0017756
-2.00814	0.00379437		-2.01411	0.0021184		-2.00721	0.00175968		-2.01334	0.000804		-2.01543	0.000610441		-2.01379	0.000786661		-2.01512	0.00177607		-2.01156	0.000602165		-2.01104	0.00240098		-2.00984	0.000404948		-2.00965	0.00118328		-2.01691	0.00102729		-2.01123	0.00091313		-2.01096	0.00044776		-2.01603	0.00033106		-2.01196	0.00143265
-2.00345	0.00460478		-2.00723	0.00242435		-2.00377	0.00194065		-2.00927	0.000766693		-2.01074	0.00165683		-2.00816	0.000878745		-2.01043	0.00144311		-2.00718	0.000936022		-2.00354	0.00199094		-2.0064	0.000721779		-2.00309	0.00152357		-2.01191	0.00112429		-2.00623	0.00117439		-2.00565	0.000746978		-2.00822	0.00063375		-2.00758	0.000702645
-1.99877	0.00396687		-2.00223	0.00166624		-1.99815	0.000930484		-2.00209	0.000616571		-2.00355	0.00132974		-2.00066	0.00162419		-2.00293	0.000887644		-2.00187	0.00156959		-1.9976	0.00126504		-2.00109	0.0015252		-1.99496	0.000798654		-2.00441	0.00128242		-1.99873	0.00149681		-2.00127	0.000913661		-2.00228	0.000896722		-2.00039	0.000354035
-1.99189	0.00390404		-1.99754	0.00167848		-1.99065	0.00140747		-1.99459	0.0014476		-1.99574	0.00163232		-1.9941	0.00125081		-1.99512	0.000470329		-1.99437	0.00145957		-1.99354	0.00171853		-1.99359	0.00145328		-1.98903	0.00108578		-1.99691	0.00109254		-1.99123	0.00139137		-1.99471	0.0011734		-1.99791	0.000587485		-1.99321	0.000657123
-1.98408	0.00473982		-1.99067	0.00220618		-1.9844	0.00205517		-1.98959	0.00218212		-1.99074	0.00218082		-1.98972	0.00121419		-1.99074	0.000568782		-1.98718	0.000972907		-1.9876	0.0016104		-1.98702	0.000709253		-1.98497	0.0012237		-1.99222	0.000981392		-1.98623	0.000962571		-1.98659	0.00132983		-1.99228	0.000500191		-1.98821	0.00104489
-1.97877	0.00450242		-1.98286	0.00262923		-1.97971	0.00271123		-1.98521	0.00141275		-1.98636	0.00102109		-1.98441	0.000742154		-1.98668	0.000186982		-1.9825	0.000993351		-1.97947	0.00168801		-1.98264	0.000726314		-1.97871	0.00100248		-1.98754	0.000975737		-1.98186	0.00140918		-1.98034	0.00141862		-1.98478	0.00152807		-1.98383	0.00112272
-1.9747	0.0031135		-1.97723	0.00224563		-1.97471	0.00246355		-1.97865	0.000524532		-1.9798	0.000792571		-1.97691	0.000913824		-1.97981	0.00098218		-1.97781	0.000821364		-1.9726	0.0017726		-1.97765	0.000416394		-1.97059	0.000856226		-1.98035	0.00082457		-1.97467	0.00104669		-1.97658	0.00118151		-1.9776	0.0015595		-1.97695	0.000612544
-1.96752	0.00465299		-1.97286	0.00190234		-1.96721	0.00276552		-1.97052	0.000550446		-1.97168	0.00102926		-1.96941	0.000361101		-1.97262	0.000678987		-1.97031	0.00102728		-1.96854	0.00191049		-1.96984	0.000650724		-1.96465	0.0010429		-1.97254	0.000535285		-1.96686	0.000906101		-1.97096	0.00147944		-1.97291	0.000574827		-1.96883	0.00105102
-1.95939	0.00417364		-1.96661	0.00204413		-1.95971	0.00279226		-1.96459	0.000390048		-1.96605	0.000713762		-1.96472	0.000640642		-1.9673	0.00107175		-1.96281	0.00126693		-1.96322	0.00214099		-1.96234	0.000921769		-1.96122	0.000924087		-1.96722	0.000428489		-1.96186	0.00112401		-1.96252	0.00116422		-1.96822	0.00042992		-1.96321	0.00109536
-1.95439	0.00319918		-1.95879	0.00175865		-1.95502	0.0023177		-1.96053	0.00108615		-1.96199	0.00113364		-1.96004	0.000625952		-1.96293	0.000781618		-1.95781	0.000846656		-1.95541	0.00170224		-1.95764	0.000869288		-1.95559	0.000778565		-1.96285	0.000802602		-1.95748	0.000887356		-1.95596	0.000964456		-1.96103	0.000818594		-1.95914	0.000828597
-1.95095	0.00393602		-1.95254	0.00165379		-1.95034	0.00180479		-1.95427	0.00121438		-1.95543	0.00151371		-1.95285	0.00107212		-1.95637	0.000356468		-1.95312	0.000724832		-1.94822	0.00194903		-1.95327	0.00054101		-1.94809	0.0010478		-1.95597	0.000667747		-1.9503	0.000706932		-1.9519	0.000600784		-1.95322	0.000797644		-1.95289	0.00062646
-1.94439	0.00420563		-1.94848	0.00187386		-1.94315	0.00222587		-1.94646	0.0011315		-1.9473	0.00148419		-1.94535	0.000483441		-1.94856	0.000180976		-1.94593	0.000895133		-1.94385	0.00202716		-1.94577	0.000831277		-1.94153	0.000596541		-1.94816	0.000272754		-1.94248	0.00109074		-1.94627	0.000369221		-1.94822	0.00056588		-1.94477	0.00110645
-1.93689	0.0035588		-1.94254	0.00189433		-1.93534	0.00187069		-1.94021	0.00105331		-1.94168	0.0014212		-1.94035	0.000767586		-1.9423	0.00107489		-1.93812	0.00094635		-1.93885	0.00200828		-1.93796	0.000841644		-1.93684	0.000632554		-1.94285	0.000617503		-1.93748	0.00155188		-1.93815	0.000937351		-1.94385	0.000453053		-1.93883	0.00131307
-1.93127	0.00274541		-1.93411	0.0020762		-1.93034	0.00117303		-1.93615	0.000655889		-1.93793	0.00193833		-1.93566	0.00120214		-1.93824	0.00151989		-1.93343	0.000868787		-1.93104	0.00233501		-1.93295	0.000511854		-1.93184	0.0012727		-1.93941	0.000656872		-1.93373	0.000619063		-1.93159	0.000712617		-1.93635	0.00137116		-1.93477	0.000428804
-1.92689	0.0041067		-1.92817	0.00244545		-1.92596	0.00182883		-1.93021	0.000997906		-1.93199	0.000669218		-1.92847	0.000532333		-1.9323	0.00107149		-1.92968	0.00139402		-1.92385	0.0023376		-1.92858	0.000492849		-1.92434	0.0016806		-1.93316	0.000944634		-1.92717	0.00107903		-1.92784	0.00112815		-1.92853	0.00137618		-1.92852	0.000527396
-1.92095	0.00404204		-1.92473	0.00172806		-1.91877	0.00191823		-1.92178	0.00129502		-1.92449	0.000958887		-1.92066	0.00110172		-1.92418	0.00120389		-1.92281	0.000993983		-1.91979	0.00168439		-1.9214	0.000853954		-1.91684	0.000510306		-1.92535	0.000873292		-1.91936	0.000781445		-1.92315	0.00106861		-1.92416	0.000636151		-1.92039	0.00104182
-1.91283	0.00369383		-1.91942	0.00210406		-1.91065	0.00157331		-1.91584	0.00100774		-1.91855	0.00115051		-1.91597	0.00130759		-1.91762	0.000811127		-1.91531	0.00159425		-1.91541	0.00161299		-1.91358	0.000704069		-1.91215	0.000408391		-1.91972	0.00112582		-1.91404	0.000319373		-1.91565	0.00119623		-1.9201	0.000701839		-1.91445	0.00120646
-1.90658	0.00360473		-1.91192	0.00247921		-1.90596	0.00186097		-1.91209	0.000714195		-1.91418	0.000562997		-1.91222	0.000967759		-1.91356	0.000315468		-1.91	0.0012233		-1.90822	0.00191851		-1.90859	0.000315967		-1.90746	0.000899588		-1.91535	0.000671445		-1.90967	0.000776758		-1.90846	0.00125428		-1.91353	0.000942769		-1.91071	0.00184259
-1.9022	0.00381264		-1.90536	0.00273072		-1.90221	0.00180155		-1.90709	0.00148066		-1.90855	0.000769904		-1.90566	0.00157486		-1.90793	0.000384411		-1.90562	0.000718509		-1.90104	0.00101358		-1.90483	0.000318991		-1.90028	0.00113233		-1.90941	0.000589445		-1.90373	0.00107457		-1.90409	0.0012562		-1.90603	0.000755306		-1.90539	0.00145317
-1.89689	0.00379277		-1.90067	0.00265349		-1.89565	0.000775178		-1.89928	0.00203267		-1.90074	0.00128019		-1.89816	0.00160709		-1.89949	0.000494354		-1.89937	0.0015051		-1.89604	0.000746345		-1.89858	0.000632798		-1.89246	0.00155934		-1.9016	0.000585529		-1.89561	0.00112167		-1.89909	0.00139194		-1.90072	0.000595778		-1.89789	0.00126849
-1.88908	0.00354235		-1.89567	0.00259104		-1.88815	0.00167244		-1.89271	0.00207065		-1.89386	0.00126332		-1.89254	0.00106554		-1.89324	0.00109839		-1.89156	0.00101675		-1.89166	0.00131264		-1.89108	0.000243833		-1.88746	0.00165684		-1.89472	0.000681668		-1.88905	0.000738565		-1.8919	0.00143313		-1.89635	0.00128256		-1.89133	0.000955729
-1.8822	0.00393945		-1.88817	0.00204456		-1.88252	0.00196441		-1.88802	0.00146659		-1.88949	0.00103242		-1.88816	0.000907028		-1.88949	0.000979046		-1.88531	0.000330485		-1.88479	0.000974776		-1.88546	0.000364345		-1.88309	0.00178595		-1.89066	0.000518755		-1.88498	0.00136606		-1.88409	0.00220316		-1.8901	0.0010892		-1.88665	0.00145058
-1.87783	0.00341555		-1.88067	0.00195235		-1.87815	0.00207732		-1.88303	0.00127134		-1.88449	0.000826572		-1.88222	0.00117319		-1.88449	0.00157081		-1.88094	0.000479709		-1.87666	0.00105394		-1.88108	0.000375792		-1.8759	0.00143145		-1.88535	0.000530718		-1.87967	0.00136653		-1.87909	0.00199016		-1.88228	0.000632659		-1.88164	0.000954314
-1.87252	0.00333672		-1.87598	0.00267396		-1.87221	0.00216375		-1.87584	0.00116367		-1.87668	0.00112309		-1.8741	0.000971925		-1.87699	0.00163505		-1.87531	0.000849607		-1.87104	0.00136981		-1.87515	0.000970795		-1.86809	0.00120337		-1.87722	0.000941371		-1.87154	0.00145674		-1.87471	0.000903204		-1.87604	0.000727154		-1.87414	0.000668444
-1.8647	0.00304724		-1.87161	0.00309278		-1.86409	0.00269854		-1.86834	0.00124521		-1.86918	0.00118055		-1.86785	0.000586926		-1.87043	0.00108795		-1.8675	0.00101253		-1.86697	0.00194981		-1.86702	0.000801473		-1.8634	0.00102012		-1.87004	0.000870464		-1.86467	0.00139114		-1.86784	0.000627889		-1.87166	0.00083518		-1.86664	0.000706183
-1.85752	0.00398126		-1.86411	0.00208908		-1.85784	0.00245005		-1.86334	0.00127447		-1.86449	0.00121666		-1.86347	0.00108813		-1.86574	0.000909842		-1.86062	0.000900402		-1.86073	0.00157703		-1.86077	0.000442743		-1.85965	0.00124649		-1.86566	0.000433492		-1.8603	0.00096304		-1.85971	0.000881221		-1.86603	0.000857876		-1.86164	0.000647216
-1.85345	0.00382544		-1.8563	0.00218487		-1.85377	0.00170647		-1.85896	0.000948313		-1.86011	0.00112441		-1.85816	0.00103003		-1.86074	0.00015904		-1.85656	0.00104984		-1.85229	0.00167119		-1.85671	0.000518333		-1.85309	0.000755047		-1.86066	0.000988135		-1.85529	0.00145323		-1.8544	0.00131191		-1.85791	0.000924001		-1.85726	0.00126118
-1.84908	0.00442177		-1.8513	0.00231379		-1.84815	0.00162004		-1.85178	0.00120611		-1.8523	0.00123986		-1.85035	0.00102652		-1.85324	0.000985575		-1.85125	0.000972485		-1.84635	0.00218497		-1.85108	0.00121679		-1.84559	0.000385853		-1.85285	0.00103251		-1.84717	0.00120392		-1.85034	0.00143527		-1.85135	0.0010137		-1.84977	0.00134656
-1.84189	0.0033438		-1.84692	0.00245916		-1.84034	0.00235741		-1.84396	0.00126196		-1.8448	0.000887985		-1.84347	0.000502297		-1.84574	0.000291181		-1.84312	0.000295497		-1.8426	0.00200233		-1.84296	0.00123039		-1.83997	0.000191824		-1.84566	0.000622071		-1.84029	0.000837212		-1.84346	0.00103211		-1.84728	0.00181418		-1.84195	0.00167937
-1.8347	0.00292271		-1.83973	0.00222812		-1.83346	0.00302725		-1.83896	0.00141297		-1.84043	0.000403007		-1.8391	0.00128962		-1.84074	0.00154678		-1.83625	0.000306457		-1.83635	0.00214953		-1.83608	0.000856762		-1.83559	0.000315297		-1.84159	0.000485476		-1.83623	0.000518307		-1.83534	0.000279583		-1.84166	0.00172164		-1.83696	0.00124396
-1.83002	0.0030221		-1.83192	0.00287862		-1.82909	0.0024541		-1.83459	0.000532798		-1.83636	0.00084186		-1.8341	0.00161257		-1.83637	0.000756286		-1.8325	0.000615865		-1.82791	0.00191566		-1.8317	0.00176125		-1.82934	0.00140671		-1.83722	0.000466118		-1.83186	0.00129741		-1.83002	0.00104918		-1.83354	0.000774511		-1.83258	0.000939926
-1.82533	0.00261175		-1.82723	0.00263281		-1.82377	0.00131726		-1.8274	0.000858955		-1.82949	0.000719034		-1.82597	0.00043148		-1.82918	0.00106679		-1.82781	0.00065844		-1.82197	0.00135765		-1.82671	0.00139799		-1.82153	0.00189791		-1.83004	0.000709074		-1.82436	0.00133959		-1.82659	0.000915795		-1.82666	0.000691146		-1.8254	0.0010831
-1.81845	0.00292728		-1.82348	0.00252689		-1.81596	0.00137101		-1.81959	0.00130329		-1.8223	0.000945181		-1.81879	0.000361101		-1.82105	0.00113234		-1.82031	0.000714715		-1.81854	0.00148726		-1.81858	0.00112997		-1.81528	0.0012068		-1.82285	0.00141902		-1.81748	0.000703652		-1.82033	0.000932015		-1.82291	0.000805282		-1.81727	0.00116423
-1.81064	0.00278814		-1.81692	0.00249313		-1.80909	0.00220561		-1.81459	0.000572339		-1.81699	0.000497103		-1.81504	0.000975652		-1.81574	0.00130104		-1.81343	0.000537038		-1.81291	0.00150381		-1.81171	0.00110211		-1.8109	0.00110513		-1.81785	0.000970517		-1.81248	0.000964211		-1.81283	0.00130807		-1.81822	0.00069682		-1.81258	0.000474327
-1.80502	0.00335546		-1.80911	0.00210511		-1.80502	0.00188231		-1.81115	0.00099947		-1.81261	0.00117555		-1.81035	0.00143213		-1.81168	0.000678464		-1.80875	0.00111201		-1.80541	0.00184193		-1.80764	0.000694566		-1.80528	0.00107377		-1.81347	0.000968995		-1.8078	0.0010406		-1.8069	0.000763838		-1.81072	0.000625458		-1.80883	0.000608534
-1.80095	0.00311624		-1.80379	0.0023064		-1.80034	0.0022364		-1.80459	0.00134998		-1.80605	0.00148288		-1.80316	0.00135013		-1.8048	0.00216649		-1.80406	0.00134597		-1.79885	0.00135196		-1.80296	0.000786786		-1.79715	0.000676896		-1.8066	0.000946809		-1.80092	0.00155703		-1.80253	0.00112986		-1.80385	0.000566098		-1.80226	0.00092719
-1.7947	0.0031416		-1.79942	0.00342131		-1.79315	0.0026348		-1.79709	0.00115205		-1.79824	0.00163997		-1.79629	0.00102213		-1.79668	0.00218608		-1.79687	0.000732631		-1.79448	0.00128366		-1.79577	0.000611633		-1.79028	0.0012286		-1.79879	0.00076432		-1.79311	0.0013349		-1.7969	0.0014502		-1.79947	0.000530744		-1.79476	0.00127415
-1.78658	0.00255441		-1.79317	0.00349874		-1.78596	0.00191688		-1.79146	0.00134395		-1.79199	0.000720879		-1.79129	0.00120433		-1.79137	0.000793369		-1.78906	0.000443246		-1.78916	0.00168542		-1.7889	0.000957836		-1.78621	0.00118941		-1.79285	0.000947462		-1.78748	0.00145581		-1.78908	0.000889331		-1.79447	0.000809865		-1.78914	0.00113876
-1.78064	0.0036968		-1.78536	0.00315461		-1.78127	0.00124731		-1.78709	0.00137276		-1.78792	0.00126384		-1.7866	0.00119841		-1.78793	0.000672719		-1.78374	0.000672562		-1.78166	0.00223076		-1.7839	0.00136689		-1.78059	0.00160392		-1.78878	0.00104991		-1.78342	0.00130889		-1.7819	0.00119175		-1.78729	0.000528998		-1.78477	0.00103286
-1.77658	0.0040706		-1.77879	0.00335653		-1.77659	0.00110064		-1.78115	0.0012041		-1.78199	0.000811812		-1.77972	0.000863178		-1.78168	0.000585756		-1.77937	0.000813987		-1.77416	0.00118355		-1.77921	0.0010669		-1.77247	0.00145571		-1.78253	0.00111407		-1.77686	0.00146494		-1.77753	0.000960827		-1.77947	0.000359867		-1.77852	0.00084157
-1.77033	0.0048223		-1.77442	0.00292167		-1.76971	0.00195523		-1.77334	0.00127201		-1.77386	0.00134371		-1.77191	0.000759913		-1.77418	0.00077979		-1.77281	0.00113688		-1.76947	0.00195317		-1.77233	0.000668434		-1.76559	0.000457389		-1.77441	0.000966602		-1.76873	0.000514558		-1.77253	0.000274888		-1.77447	0.000359431		-1.7704	0.0010522
-1.76189	0.00412406		-1.76911	0.0025347		-1.7619	0.0020576		-1.76646	0.00141789		-1.76761	0.00171561		-1.76628	0.000571798		-1.76855	0.000368481		-1.765	0.000872159		-1.7651	0.00287518		-1.76452	0.000537771		-1.76184	0.000472088		-1.76847	0.00116497		-1.7628	0.000973818		-1.76472	0.000493432		-1.7701	0.000454581		-1.76414	0.000841806
-1.75627	0.00313132		-1.7613	0.00228952		-1.75627	0.00174023		-1.7624	0.00107118		-1.76324	0.0014067		-1.76222	0.00134508		-1.76418	0.00100882		-1.75937	0.000994616		-1.7576	0.00278334		-1.7589	0.00124335		-1.75715	0.00111297		-1.76441	0.000235125		-1.75873	0.001296		-1.75752	0.00088677		-1.76322	0.000433194		-1.75977	0.00101399
-1.75252	0.00321494		-1.75442	0.002268		-1.75221	0.00168567		-1.75709	0.00103655		-1.75761	0.00103875		-1.75566	0.000935311		-1.75824	0.00104486		-1.75531	0.00127536		-1.74979	0.00202251		-1.75483	0.00114055		-1.74965	0.000721239		-1.75816	0.000522235		-1.75248	0.00112519		-1.75284	0.00128075		-1.7551	0.000878608		-1.75446	0.000929548
-1.74689	0.00290535		-1.75005	0.00174515		-1.74565	0.00216078		-1.74928	0.00159437		-1.74949	0.00134107		-1.74785	0.000826345		-1.75043	0.00104694		-1.74874	0.00107028		-1.74479	0.00201992		-1.74827	0.00108828		-1.74278	0.00113306		-1.75003	0.00137682		-1.74436	0.00223374		-1.74815	0.00103126		-1.74947	0.00085744		-1.74633	0.000788029
-1.73939	0.00406854		-1.74473	0.00294488		-1.73752	0.00149634		-1.74209	0.00160063		-1.74293	0.00128941		-1.74191	0.00141919		-1.74356	0.00105609		-1.74062	0.0010667		-1.74041	0.00190169		-1.74014	0.000765405		-1.73778	0.00146502		-1.74378	0.000772151		-1.73842	0.00144667		-1.74065	0.00155435		-1.74541	0.00115053		-1.73946	0.000524094
-1.73314	0.00318547		-1.73692	0.00307527		-1.73159	0.00101881		-1.73771	0.00166318		-1.73917	0.00144413		-1.73785	0.00122735		-1.73918	0.00051603		-1.735	0.000900613		-1.73322	0.00147122		-1.73421	0.00118223		-1.73309	0.00128593		-1.74034	0.000928103		-1.73467	0.000879857		-1.73315	0.00151359		-1.73885	0.00035834		-1.73539	0.0010338
-1.72845	0.00273193		-1.72973	0.00228741		-1.72784	0.00214727		-1.73271	0.00107967		-1.73418	0.00193359		-1.7316	0.000774602		-1.73418	0.00077979		-1.73125	0.00039498		-1.72541	0.000826025		-1.73046	0.00114487		-1.7259	0.000750147		-1.73503	0.000881122		-1.72905	0.00143917		-1.72877	0.00111236		-1.73041	0.00110688		-1.73008	0.000225488
-1.72314	0.00301868		-1.72598	0.00206101		-1.72159	0.00189473		-1.7249	0.00122488		-1.72668	0.0012765		-1.72316	0.000737769		-1.72637	0.000818701		-1.72531	0.000609331		-1.72072	0.000877505		-1.72421	0.000529996		-1.71809	0.000552198		-1.72753	0.00150189		-1.72155	0.00103076		-1.7244	0.000793291		-1.7251	0.00150101		-1.72196	0.000178787
-1.71564	0.00365956		-1.72129	0.00253322		-1.71315	0.00200682		-1.71771	0.001692		-1.72011	0.00105061		-1.71754	0.000546585		-1.71887	0.000490437		-1.71781	0.000629354		-1.71697	0.00171103		-1.71577	0.00106258		-1.71278	0.000483112		-1.72097	0.00161847		-1.71498	0.00144784		-1.71753	0.00105537		-1.72135	0.00144842		-1.71508	0.000158266
-1.70814	0.00439824		-1.71411	0.00280372		-1.70721	0.00166137		-1.71365	0.00160286		-1.71543	0.000879551		-1.71379	0.000975214		-1.71449	0.00111249		-1.71156	0.00112276		-1.71041	0.00207347		-1.70983	0.00132888		-1.7084	0.00044269		-1.71659	0.000828267		-1.71061	0.00112355		-1.71034	0.0012259		-1.71572	0.000927275		-1.71102	0.000430927
-1.70345	0.00446198		-1.70723	0.00276173		-1.70377	0.00143448		-1.70927	0.000956132		-1.71043	0.00096205		-1.70816	0.00075772		-1.7098	0.000876415		-1.70718	0.00227335		-1.7026	0.0030736		-1.70639	0.00138049		-1.70184	0.000796939		-1.7116	0.000762798		-1.7053	0.00116385		-1.70502	0.00133538		-1.70791	0.000719953		-1.70665	0.000863506
-1.69908	0.0040393		-1.70223	0.00247224		-1.69815	0.00179101		-1.70209	0.000736311		-1.70324	0.000682924		-1.70066	0.000810997		-1.70199	0.000789975		-1.70156	0.00128484		-1.69729	0.00229285		-1.70077	0.00153772		-1.69403	0.00119333		-1.70378	0.00059771		-1.69748	0.000535413		-1.70065	0.00170588		-1.70197	0.000944297		-1.69915	0.0010397
-1.69158	0.00363626		-1.69754	0.00288664		-1.69034	0.00188393		-1.6949	0.00147486		-1.69574	0.00113047		-1.69441	0.000914482		-1.69449	0.00110309		-1.69406	0.00086141		-1.69291	0.00186341		-1.69296	0.00123838		-1.68809	0.00156154		-1.69628	0.000587269		-1.6903	0.000882201		-1.69409	0.00140475		-1.6976	0.00131857		-1.69227	0.00145364
-1.68377	0.00412452		-1.69067	0.00333606		-1.68409	0.00171349		-1.6899	0.00131356		-1.69074	0.000589618		-1.69004	0.000853751		-1.69043	0.000448131		-1.68718	0.00131119		-1.68666	0.0018484		-1.68671	0.000486369		-1.68403	0.00111028		-1.6916	0.000878729		-1.68561	0.00105981		-1.68628	0.00106476		-1.69197	0.000774947		-1.68727	0.0015053
-1.67908	0.00361112		-1.68286	0.00234839		-1.67971	0.0017451		-1.68552	0.00125057		-1.68605	0.00124882		-1.68441	0.000983545		-1.68605	0.000547106		-1.6825	0.00103846		-1.67854	0.00187039		-1.68234	0.000764757		-1.67746	0.000875335		-1.68691	0.000811955		-1.68092	0.000922972		-1.68002	0.0012848		-1.68416	0.000211032		-1.68258	0.000855015
-1.6747	0.00329399		-1.67723	0.00240304		-1.6744	0.00165191		-1.67865	0.000934462		-1.67918	0.00168846		-1.67691	0.000754212		-1.67887	0.000366914		-1.6775	0.000628933		-1.67229	0.00117941		-1.67702	0.000505375		-1.66934	0.00126119		-1.67972	0.00068667		-1.67342	0.0010024		-1.67596	0.00103403		-1.67729	0.000373616		-1.67571	0.00075029
-1.6672	0.00380876		-1.67317	0.00280794		-1.6669	0.00155333		-1.67052	0.00129055		-1.67136	0.000680815		-1.66972	0.00103419		-1.67168	0.0015191		-1.67	0.000783847		-1.66822	0.00144509		-1.66952	0.000679232		-1.66372	0.00102306		-1.67191	0.000404998		-1.66592	0.00124141		-1.67003	0.00127456		-1.67291	5.87049e-05		-1.6679	0.000945587
-1.65939	0.0033438		-1.66661	0.00328838		-1.65971	0.00174726		-1.6649	0.00149541		-1.66574	0.00101503		-1.66503	0.00167505		-1.66668	0.0014089		-1.66249	0.000915578		-1.6626	0.00204656		-1.66233	0.000905787		-1.66028	0.000451264		-1.66691	0.000358887		-1.66092	0.00150525		-1.6619	0.00126645		-1.66791	0.000515904		-1.66227	0.00132038
-1.6547	0.00270726		-1.65848	0.00332235		-1.65502	0.00213106		-1.66084	0.00124655		-1.66136	0.00123037		-1.66003	0.000884226		-1.6623	0.000889994		-1.65781	0.000703545		-1.65447	0.00241236		-1.65765	0.000509478		-1.65465	0.00101963		-1.66253	0.000262749		-1.65654	0.000578995		-1.65534	0.000672494		-1.6601	0.000296361		-1.65821	0.001164
-1.65095	0.00356474		-1.65286	0.00234776		-1.65034	0.00166029		-1.65427	0.00109352		-1.6548	0.00144518		-1.65285	0.00201028		-1.65543	0.00118849		-1.65312	0.00183073		-1.6476	0.00200647		-1.65296	0.000729986		-1.64684	0.0015978		-1.65534	0.000628813		-1.64904	0.000879857		-1.65127	0.000410625		-1.6526	0.00027301		-1.65164	0.000959975
-1.64439	0.00401028		-1.64848	0.00239101		-1.64284	0.00151957		-1.64646	0.00135288		-1.64668	0.00132657		-1.64535	0.0013122		-1.64762	0.000787102		-1.64562	0.000817149		-1.64354	0.00167895		-1.64546	0.000487449		-1.64059	0.0011017		-1.64722	0.000610978		-1.64123	0.000537756		-1.64565	0.000889971		-1.64822	0.00111234		-1.64383	0.000566786
-1.63689	0.00436374		-1.64223	0.00241823		-1.63534	0.0011941		-1.64053	0.000834381		-1.64136	0.00175752		-1.64035	0.00118372		-1.64168	0.000891561		-1.63781	0.001425		-1.63823	0.0019511		-1.63796	0.00109325		-1.63622	0.000682776		-1.64254	0.00099727		-1.63654	0.000386622		-1.63753	0.00101269		-1.64353	0.00162715		-1.6379	0.000706655
-1.63127	0.00329788		-1.63411	0.00292842		-1.63034	0.00219238		-1.63646	0.000820754		-1.63793	0.00169822		-1.63597	0.00116004		-1.63762	0.00111145		-1.63343	0.00157549		-1.6301	0.00232855		-1.63296	0.00180812		-1.63059	0.00113575		-1.63878	0.00157975		-1.63279	0.00133256		-1.63097	0.000588192		-1.63572	0.00149948		-1.63383	0.000788736
-1.62689	0.00269012		-1.62817	0.00276426		-1.62596	0.0019131		-1.63021	0.000809584		-1.63167	0.0018988		-1.62847	0.00226264		-1.63137	0.00159431		-1.62968	0.00115543		-1.62291	0.00137783		-1.62827	0.00102522		-1.62309	0.00122909		-1.63222	0.00106078		-1.62592	0.0018682		-1.62721	0.000432607		-1.62822	0.000618911		-1.62758	0.000908556
-1.62064	0.00354761		-1.62473	0.00320504		-1.61846	0.00190661		-1.62209	0.0012805		-1.62418	0.00166606		-1.62066	0.00144287		-1.62324	0.00152929		-1.62281	0.00118641		-1.61916	0.00153796		-1.62108	0.000392205		-1.6159	0.00116687		-1.62472	0.000674272		-1.61842	0.00152751		-1.62221	0.000889758		-1.62385	0.000603198		-1.61914	0.00127155
-1.61283	0.00422345		-1.61911	0.00220702		-1.61065	0.00120139		-1.61615	0.00116501		-1.61824	0.000771222		-1.61597	0.000777891		-1.6173	0.00105948		-1.61531	0.000704177		-1.61479	0.00163472		-1.61327	0.000870584		-1.61121	0.00102625		-1.61941	0.0012163		-1.61311	0.00163951		-1.61471	0.000364099		-1.61978	0.00159245		-1.61321	0.000881196
-1.60658	0.0045159		-1.61161	0.0022066		-1.60596	0.00072494		-1.6124	0.000914133		-1.61386	0.00122932		-1.61222	0.000766929		-1.61324	0.000968861		-1.61	0.000800287		-1.60729	0.00153589		-1.60858	0.000567359		-1.60621	0.000638678		-1.61503	0.000728214		-1.60873	0.00154157		-1.60815	0.000770882		-1.61291	0.00101304		-1.60977	0.000439654
-1.6022	0.00399131		-1.60505	0.00158184		-1.60221	0.00174591		-1.60677	0.00074547		-1.60793	0.00170481		-1.60566	0.00120148		-1.60699	0.000666451		-1.60562	0.00130971		-1.60041	0.00195499		-1.60452	0.000938615		-1.59903	0.000796939		-1.60878	0.00108232		-1.60248	0.00129225		-1.60346	0.000819115		-1.60541	0.000766655		-1.60414	0.0010371
-1.59689	0.00362735		-1.60067	0.0021068		-1.59565	0.00266316		-1.59927	0.00066326		-1.60011	0.00150581		-1.59816	0.0015457		-1.59887	0.000424367		-1.59906	0.00109283		-1.59541	0.00216065		-1.59796	0.000761302		-1.59153	0.0012264		-1.60066	0.00116671		-1.59436	0.000771603		-1.59846	0.00069533		-1.60041	0.000683508		-1.59664	0.0013008
-1.58877	0.00349871		-1.59536	0.00276405		-1.58784	0.00182531		-1.59303	0.00118958		-1.59355	0.00179627		-1.59254	0.00102279		-1.59262	0.00115428		-1.59125	0.00142796		-1.59072	0.00216479		-1.59046	0.00105978		-1.58653	0.00114947		-1.59441	0.000309295		-1.58811	0.00159241		-1.59128	0.000693409		-1.59572	0.00041508		-1.59008	0.00153926
-1.58189	0.00373085		-1.58786	0.00280731		-1.58252	0.00219832		-1.58834	0.00108659		-1.58918	0.000899583		-1.58816	0.00102608		-1.58918	0.00170556		-1.58531	0.00162797		-1.58385	0.00204191		-1.58515	0.000953949		-1.58215	0.000574982		-1.59035	0.000481126		-1.58373	0.00113596		-1.58346	0.00129313		-1.58916	0.00045218		-1.5857	0.00179423
-1.57783	0.00430319		-1.58067	0.00265497		-1.57846	0.00204869		-1.58334	0.00113038		-1.58386	0.00100132		-1.58191	0.000649631		-1.58387	0.00117465		-1.58125	0.000720828		-1.57604	0.00169965		-1.58077	0.000523733		-1.57465	0.00105099		-1.58472	0.000559429		-1.57811	0.000478005		-1.57846	0.00117681		-1.58135	0.000860277		-1.58039	0.000817748
-1.57252	0.00513806		-1.57598	0.00285183		-1.5719	0.00162949		-1.57584	0.00103611		-1.57605	0.00148709		-1.5741	0.000889269		-1.57637	0.000845077		-1.57531	0.000631884		-1.57041	0.00122623		-1.57452	0.000373416		-1.56684	0.000987293		-1.57691	0.000328001		-1.57029	0.00119431		-1.57409	0.00140773		-1.57541	0.000611927		-1.57258	0.000695805
-1.56439	0.00427372		-1.57098	0.00261572		-1.56409	0.00147716		-1.56834	0.00140895		-1.56886	0.00141619		-1.56785	0.00143498		-1.56981	0		-1.56718	0.00103319		-1.56635	0.00170482		-1.56671	0.000657635		-1.56247	0.000663912		-1.57003	3.58888e-05		-1.56342	0.000982488		-1.56721	0.000721154		-1.57135	0.000791533		-1.56539	0.00144492
-1.55752	0.00374935		-1.56379	0.00264294		-1.55784	0.00174456		-1.56365	0.00166899		-1.56418	0.00185162		-1.56347	0.00156653		-1.56512	0.000906969		-1.56093	0.00138622		-1.55979	0.00262915		-1.56046	0.000721563		-1.55872	0.000791305		-1.56566	0.000745615		-1.55936	0.000896494		-1.55909	0.000497701		-1.56541	0.00101675		-1.5607	0.0015579
-1.55377	0.00339567		-1.55598	0.0026191		-1.55377	0.0021913		-1.55896	0.00111251		-1.55949	0.000833953		-1.55785	0.00110106		-1.56012	0.00108768		-1.55687	0.0011059		-1.55166	0.00191333		-1.55609	0.000838188		-1.55184	0.00116638		-1.56034	0.00144903		-1.55405	0.000909615		-1.55378	0.000936924		-1.55728	0.00125353		-1.55602	0.0014251
-1.54908	0.00255212		-1.5513	0.00307738		-1.54784	0.00108903		-1.55178	0.00131915		-1.55167	0.000719824		-1.55004	0.00116684		-1.55262	0.000750019		-1.55125	0.000928224		-1.54572	0.00151235		-1.55045	0.000977706		-1.54434	0.00100885		-1.55223	0.000721689		-1.54592	0.00075567		-1.5494	0.000916436		-1.55072	0.00151607		-1.54852	0.0011607
-1.54158	0.00335386		-1.54692	0.00240388		-1.54002	0.00137155		-1.54396	0.00116478		-1.54418	0.00104534		-1.54316	0.00075772		-1.54512	0.0014042		-1.54281	0.000473386		-1.54166	0.00114474		-1.54264	0.000539067		-1.53903	0.000771461		-1.54534	0.000912878		-1.53904	0.000823856		-1.54253	0.0011941		-1.54666	0.00112521		-1.54102	0.0012916
-1.5347	0.00393899		-1.53942	0.00289318		-1.53346	0.00216186		-1.53896	0.00125347		-1.54011	0.000888513		-1.5391	0.000952851		-1.54043	0.00163871		-1.53625	0.00113583		-1.53541	0.00131031		-1.53577	0.000858921		-1.53434	0.000391243		-1.54129	0.000765626		-1.53498	0.00141996		-1.53471	0.00142673		-1.54104	0.00102592		-1.53602	0.00100974
-1.53002	0.00329331		-1.5313	0.00189538		-1.5294	0.00132293		-1.53459	0.0013397		-1.53605	0.00153928		-1.53347	0.000972802		-1.53574	0.000962333		-1.5325	0.000619448		-1.52698	0.00153951		-1.5314	0.00133298		-1.52778	0.00108847		-1.53691	0.000553991		-1.53061	0.000622578		-1.5294	0.000860519		-1.53291	0.00114376		-1.53164	0.00046159
-1.52533	0.00359833		-1.52692	0.00257606		-1.52377	0.00196036		-1.5274	0.00113798		-1.52886	0.00207144		-1.52566	0.00110369		-1.52856	0.000528565		-1.5275	0.000457367		-1.52135	0.00154986		-1.52609	0.00110729		-1.51997	0.00134277		-1.52941	0.000983785		-1.52311	0.00105208		-1.52596	0.000663103		-1.52635	0.000589449		-1.52414	0.000238932
-1.51814	0.00413663		-1.52317	0.0024598		-1.51565	0.00270232		-1.51928	0.00124185		-1.52168	0.00113812		-1.51879	0.00184409		-1.52074	0.000893128		-1.52	0.00130993		-1.51791	0.000984089		-1.51796	0.00121484		-1.51371	0.000333671		-1.52253	0.00134202		-1.51623	0.000715367		-1.51971	0.000880794		-1.5226	0.000776694		-1.51633	0.000561833
-1.51033	0.00511407		-1.5163	0.00302105		-1.50877	0.00256133		-1.51459	0.0012394		-1.51636	0.000597789		-1.51504	0.000886638		-1.51574	0.000633808		-1.51344	0.00107934		-1.51229	0.00176225		-1.51108	0.00152152		-1.50965	0.000892729		-1.51754	0.00157519		-1.51124	0.00118166		-1.5119	0.00118385		-1.5176	0.000624584		-1.51165	0.00112532
-1.50502	0.00364471		-1.5088	0.00273515		-1.50502	0.00204679		-1.51115	0.00123739		-1.51199	0.000988671		-1.51035	0.000335668		-1.51137	0.00064347		-1.50875	0.00149477		-1.50447	0.00130539		-1.50733	0.00117402		-1.50403	0.000632554		-1.51285	0.00140379		-1.50655	0.000740439		-1.50628	0.00107266		-1.5101	0.000581811		-1.50789	0.00147605
-1.50064	0.00320055		-1.50348	0.00268345		-1.50034	0.00187231		-1.50459	0.00103142		-1.50543	0.00125567		-1.50285	0.000730533		-1.50418	0.000399035		-1.50375	0.00136662		-1.49854	0.000952011		-1.50265	0.000916154		-1.4959	0.000952505		-1.50597	0.00074605		-1.49967	0.000970069		-1.5019	0.000613803		-1.50322	0.000536418		-1.50102	0.00109678
-1.49408	0.00511978		-1.49911	0.00221736		-1.49284	0.00180884		-1.49678	0.00079551		-1.49761	0.00112784		-1.49597	0.00126046		-1.49605	0.00067298		-1.49656	0.000922954		-1.49416	0.000683482		-1.49514	0.00154722		-1.48934	0.00111224		-1.49816	0.00114561		-1.49186	0.00140004		-1.49596	0.00113839		-1.49885	0.000366632		-1.49352	0.000328561
-1.48595	0.00455406		-1.49286	0.00272249		-1.48596	0.00159573		-1.49146	0.0012184		-1.49168	0.000494731		-1.49129	0.00108791		-1.49137	0.000928383		-1.48875	0.000789117		-1.48854	0.00152166		-1.48827	0.00101593		-1.48497	0.00182661		-1.49253	0.00124566		-1.48655	0.00117439		-1.48815	0.00073396		-1.49385	0.000544056		-1.48821	0.000677643
-1.48033	0.00413137		-1.48505	0.00210785		-1.48127	0.00170053		-1.48709	0.00118399		-1.48761	0.000867427		-1.48629	0.000896943		-1.48762	8.74847e-05		-1.48375	0.000665185		-1.48104	0.00163704		-1.48358	0.000896285		-1.47934	0.00151548		-1.48847	0.000563996		-1.48217	0.00107106		-1.48128	0.00059929		-1.48635	0.000714933		-1.48383	0.00128358
-1.47627	0.00435368		-1.47879	0.00196564		-1.47659	0.00211054		-1.48084	0.000976907		-1.48136	0.00139405		-1.4791	0.00102542		-1.48105	0.00058889		-1.47937	0.000744434		-1.47385	0.00186573		-1.4789	0.000677505		-1.47121	0.00100346		-1.48191	0.000717991		-1.47561	0.000900243		-1.4769	0.00119026		-1.47885	0.000557587		-1.47727	0.000931671
-1.4697	0.00442223		-1.47442	0.0022028		-1.4694	0.00176103		-1.47303	0.00111117		-1.47324	0.00189616		-1.4716	0.00122932		-1.47355	0.000701706		-1.4725	0.000504369		-1.46916	0.00111008		-1.4717	0.00102522		-1.46465	0.000756761		-1.4741	0.00098248		-1.46748	0.00115869		-1.47159	0.000898508		-1.47385	0.000905888		-1.46946	0.000982146
-1.46158	0.0040249		-1.4688	0.00242561		-1.46159	0.00247706		-1.46646	0.00135914		-1.46699	0.00164919		-1.46628	0.000827879		-1.46793	0.000299799		-1.46468	0.000778789		-1.46416	0.00155555		-1.46389	0.000811839		-1.4609	0.000454449		-1.46816	0.00013442		-1.46186	0.000903055		-1.46409	0.000581576		-1.46947	0.000608653		-1.46321	0.00135198
-1.45595	0.00452893		-1.46098	0.00286238		-1.45627	0.00215159		-1.46209	0.00154746		-1.46293	0.0012989		-1.46191	0.00110676		-1.46355	0.000662795		-1.45937	0.000719142		-1.45666	0.00208382		-1.45889	0.00023217		-1.4559	0.000725893		-1.4641	0.000420877		-1.4578	0.00100123		-1.4569	0.000882288		-1.4626	0.000688745		-1.45883	0.000976486
-1.4522	0.00467036		-1.45411	0.00247836		-1.4519	0.00111874		-1.45678	0.00164017		-1.45699	0.00113285		-1.45535	0.000951754		-1.45762	0.000806688		-1.455	0.000402357		-1.44916	0.00172164		-1.45452	0.000668002		-1.4484	0.000969899		-1.45785	0.00090744		-1.45123	0.0015582		-1.45222	0.00118364		-1.45447	0.000981397		-1.4532	0.00162606
-1.44658	0.00397486		-1.44973	0.00218909		-1.44534	0.00231473		-1.44896	0.000822988		-1.44886	0.000815239		-1.44722	0.00126089		-1.4498	0.00143136		-1.44812	0.000219199		-1.44416	0.00115043		-1.44765	0.000604506		-1.44153	0.00127613		-1.44941	0.000658177		-1.44311	0.00145862		-1.44752	0.00157463		-1.44916	0.00138928		-1.44539	0.00148548
-1.43908	0.00423647		-1.44442	0.00256445		-1.43752	0.00242115		-1.44209	0.000659239		-1.44261	0.00145915		-1.4416	0.00127997		-1.44324	0.00132925		-1.43999	0.000815673		-1.43979	0.00126219		-1.43984	0.000691111		-1.43684	0.000926537		-1.44347	0.00105948		-1.43748	0.00160624		-1.43971	0.00116273		-1.44478	0.000641607		-1.43852	0.000146001
-1.43283	0.00475901		-1.43629	0.00302527		-1.4319	0.00173024		-1.43771	0.000740555		-1.43918	0.000951771		-1.43753	0.00100986		-1.43887	0.000824707		-1.43468	0.000725043		-1.43229	0.00196559		-1.43389	0.00097425		-1.43184	0.00101277		-1.44004	0.00199302		-1.43404	0.00126812		-1.43221	0.000883355		-1.43791	0.00107153		-1.43446	0.000725996
-1.42845	0.00434112		-1.42942	0.00259969		-1.42784	0.00136129		-1.4324	0.000944739		-1.43386	0.00121983		-1.43097	0.00121047		-1.43387	0.000513418		-1.43125	0.00111328		-1.42447	0.0023614		-1.42983	0.00121895		-1.42465	0.00179207		-1.43473	0.00090483		-1.42811	0.000951793		-1.42815	0.00097406		-1.42978	0.00131617		-1.42883	0.00188363
-1.42283	0.00418964		-1.42567	0.00252373		-1.42127	0.00200034		-1.42459	0.001058		-1.42605	0.001631		-1.42285	0.00126813		-1.42574	2.16753e-05		-1.425	0.00164273		-1.41979	0.00181374		-1.42359	0.00125458		-1.41684	0.000985333		-1.42691	0.000715381		-1.4203	0.00073177		-1.42377	0.00104769		-1.42478	0.00171881		-1.4207	0.00249193
-1.41533	0.00446838		-1.42098	0.00209899		-1.41284	0.00227449		-1.4174	0.00103633		-1.41949	0.00187191		-1.41722	0.00101468		-1.41855	0.00110048		-1.4175	0.00198396		-1.41604	0.00218626		-1.41515	0.000962156		-1.41184	0.00136702		-1.42066	0.000584877		-1.41436	0.00101857		-1.41659	0.0007982		-1.42103	0.00198483		-1.41414	0.00180296
-1.40814	0.00389307		-1.4138	0.00208253		-1.40721	0.00181748		-1.41365	0.0014686		-1.41511	0.00168346		-1.41378	0.00121595		-1.41418	0.00126788		-1.41156	0.00168573		-1.40948	0.00269383		-1.40952	0.000603858		-1.40746	0.00153925		-1.41629	0.000478081		-1.40998	0.000903289		-1.4094	0.0010336		-1.41478	0.001374		-1.4104	0.00158195
-1.40377	0.00256103		-1.40692	0.00254462		-1.40377	0.00202519		-1.40928	0.00130798		-1.41011	0.000720352		-1.40785	0.00112496		-1.40918	0.00118797		-1.40718	0.000843284		-1.40198	0.00299909		-1.40608	0.000743376		-1.4009	0.00147335		-1.41098	0.00119281		-1.40436	0.00112917		-1.4044	0.001024		-1.40729	0.00047444		-1.4057	0.000797227
-1.39877	0.00407151		-1.40223	0.00217157		-1.39784	0.00208002		-1.40178	0.00109441		-1.40261	0.000427256		-1.40035	0.000863836		-1.40137	0.000875109		-1.40156	0.000971431		-1.39666	0.00183107		-1.40015	0.00106885		-1.39278	0.00174283		-1.40316	0.000932671		-1.39686	0.00134123		-1.40002	0.00161369		-1.40135	8.86028e-05		-1.3982	0.000847467
-1.39127	0.0041083		-1.39754	0.00248638		-1.39034	0.0020603		-1.3949	0.00135467		-1.39511	0.00122325		-1.3941	0.00119731		-1.39418	0.00138357		-1.39375	0.00104183		-1.39229	0.00190118		-1.39265	0.00119433		-1.38746	0.00185381		-1.39598	0.000672097		-1.38967	0.00143636		-1.39315	0.00157527		-1.39697	0.000666486		-1.39133	0.00118075
-1.38377	0.00344068		-1.39036	0.00264589		-1.3844	0.00159897		-1.3899	0.000775182		-1.39043	0.00158646		-1.38972	0.00130562		-1.39012	0.000995237		-1.38687	0.000494884		-1.38572	0.00246798		-1.38671	0.00142585		-1.38309	0.00102527		-1.3916	0.000790204		-1.38498	0.00126601		-1.38534	0.00186787		-1.39135	0.000332806		-1.38633	0.000959267
-1.37908	0.00443822		-1.38255	0.00264695		-1.38002	0.00198089		-1.38521	0.000447908		-1.38574	0.00097602		-1.3841	0.00138608		-1.38543	0.00107593		-1.3825	0.000683943		-1.3776	0.00152399		-1.38233	0.0015658		-1.37653	0.00095961		-1.3866	0.00124088		-1.3803	0.00101225		-1.3794	0.000916863		-1.38353	0.000369033		-1.38164	0.00136614
-1.3747	0.00389284		-1.37723	0.00274169		-1.3744	0.00160708		-1.37834	0.00118444		-1.37855	0.000494467		-1.3766	0.00080442		-1.37824	0.000615788		-1.37749	0.00109726		-1.37135	0.00217669		-1.37671	0.00124076		-1.3684	0.00095667		-1.3791	0.000943546		-1.37248	0.00105395		-1.37533	0.00067847		-1.37666	0.000615419		-1.37477	0.00101281
-1.3672	0.00399726		-1.37286	0.00378464		-1.36659	0.00132212		-1.37053	0.00116813		-1.37074	0.00135161		-1.36941	0.00084235		-1.37137	0.000168963		-1.36968	0.00177572		-1.36729	0.00266356		-1.3689	0.000488313		-1.36278	0.00137976		-1.3716	0.00097813		-1.36498	0.00148791		-1.36909	0.000692769		-1.37229	0.000617383		-1.36695	0.000934737
-1.35939	0.00358439		-1.36629	0.00360698		-1.3594	0.00160843		-1.36521	0.00157092		-1.36574	0.00180312		-1.36503	0.0010787		-1.36637	0.00116394		-1.3625	0.00148002		-1.36166	0.00192705		-1.36202	0.000228498		-1.35934	0.00108039		-1.3666	0.000142902		-1.3603	0.00106497		-1.36096	0.000867562		-1.36697	0.000637679		-1.36164	0.000829777
-1.35502	0.00377449		-1.35817	0.00258914		-1.35502	0.00178993		-1.36084	0.00127492		-1.36168	0.000852403		-1.36003	0.000827441		-1.36199	0.00110048		-1.35812	0.00120602		-1.35354	0.00169448		-1.35733	0.00100729		-1.3534	0.00104927		-1.36222	0.000880252		-1.35561	0.000625859		-1.35471	0.00126709		-1.35947	0.00041879		-1.35726	0.00133312
-1.35127	0.00375964		-1.35255	0.00332741		-1.35002	0.00222911		-1.35427	0.00087772		-1.35449	0.000705064		-1.35253	0.00126879		-1.35512	0.0008913		-1.35312	0.00104141		-1.34698	0.00251429		-1.35233	0.00178285		-1.3459	0.00113502		-1.35504	0.000931583		-1.34811	0.00106192		-1.35065	0.00109891		-1.35228	0.000343063		-1.3507	0.00101163
-1.34439	0.00401485		-1.34848	0.00353313		-1.34252	0.00190121		-1.34646	0.00070794		-1.34636	0.000808122		-1.34503	0.000595915		-1.34699	0.000510023		-1.34562	0.00133501		-1.34291	0.00191721		-1.34484	0.00122067		-1.33997	0.00096353		-1.34722	0.000751922		-1.34029	0.00108746		-1.34471	0.000986438		-1.3476	0.000480114		-1.34258	0.00111942
-1.33689	0.00416976		-1.34192	0.00336033		-1.33502	0.00159222		-1.34053	0.000428695		-1.34136	0.000201372		-1.34035	0.000140538		-1.34137	0.00037527		-1.33812	0.000541464		-1.33729	0.00186185		-1.33734	0.00150597		-1.33559	0.000531619		-1.34253	0.000287762		-1.33592	0.00134216		-1.33627	0.00118428		-1.34291	0.000867915		-1.33696	0.000784962
-1.33158	0.0055516		-1.33379	0.00308941		-1.33065	0.00259428		-1.33646	0.000897602		-1.33761	0		-1.33566	0.000453404		-1.33731	0.00075942		-1.33375	0.000549895		-1.32885	0.00272798		-1.33264	0.00118418		-1.32965	0		-1.33847	0.000801949		-1.33186	0.000713727		-1.33034	0.00228191		-1.3351	0.000552131		-1.3329	0.00134632
-1.3272	0.00495299		-1.32817	0.00325441		-1.32596	0.00239225		-1.3299	0.000932675		-1.33136	0.000898265		-1.32816	0.00137424		-1.33105	0.00143031		-1.32969	0.000927381		-1.32229	0.00130876		-1.32827	0.00112306		-1.32184	0.000204073		-1.33191	0.00105534		-1.32498	0.000606879		-1.32659	0.00187321		-1.3276	0.000663648		-1.32633	0.00143477
-1.32095	0.0042888		-1.32442	0.00319301		-1.31846	0.00194065		-1.32177	0.000809808		-1.32386	0.0010854		-1.32066	0.00113373		-1.32293	0.00123262		-1.3225	0.00140625		-1.31885	0.00128004		-1.32077	0.00110232		-1.31496	0.000721239		-1.32441	0.000825005		-1.3178	0.000674362		-1.32127	0.00148371		-1.32353	0.000622839		-1.31789	0.00113994
-1.31283	0.00416793		-1.31879	0.00308498		-1.31065	0.00102664		-1.31615	0.00110335		-1.31824	0.000769904		-1.31628	0.0010377		-1.31668	0.000821051		-1.31531	0.00126609		-1.31385	0.00195499		-1.31296	0.00118612		-1.31059	0.000962795		-1.31909	0.000471338		-1.31248	0.000903289		-1.31377	0.00120456		-1.31947	0.00107065		-1.31227	0.000872704
-1.30658	0.00337168		-1.31098	0.00265286		-1.30627	0.00136804		-1.31271	0.00114423		-1.31386	0.000329996		-1.31253	0.00101884		-1.31293	0.00117674		-1.31031	0.000876164		-1.30635	0.00213582		-1.30858	0.00174225		-1.30559	0.000886359		-1.31472	0.000800209		-1.3078	0.001509		-1.30752	0.000885703		-1.31228	0.000586612		-1.30883	0.00079534
-1.30252	0.00368721		-1.30505	0.00212199		-1.30221	0.00130889		-1.30709	0.000917038		-1.30793	0.000602006		-1.30566	0.00106291		-1.30668	0.000634591		-1.30593	0.00127557		-1.29947	0.00190661		-1.30452	0.00137423		-1.29778	0.00114604		-1.30847	0.001225		-1.30123	0.00133443		-1.30284	0.00134221		-1.30478	0.000587485		-1.30289	0.000830956
-1.29689	0.00419306		-1.30067	0.00224627		-1.29534	0.00177589		-1.29927	0.000522745		-1.30011	0.000929894		-1.29816	0.00144375		-1.29824	0.000291964		-1.29906	0.00105806		-1.29479	0.00189833		-1.29765	0.00119389		-1.29059	0.00151132		-1.30035	0.000917446		-1.29342	0.00136559		-1.29784	0.00115718		-1.29978	0.000606471		-1.29539	0.000902424
-1.28908	0.00447181		-1.29504	0.00314912		-1.28815	0.00226746		-1.29303	0.00124208		-1.29355	0.00160227		-1.29285	0.00156828		-1.29231	0.000699878		-1.29125	0.000618184		-1.2901	0.00155167		-1.29046	0.0010587		-1.2859	0.00128128		-1.2941	0.000686235		-1.28717	0.00254421		-1.29034	0.000801187		-1.29541	0.000727591		-1.28945	0.000824588
-1.2822	0.00526646		-1.28723	0.00248934		-1.28284	0.00219184		-1.28865	0.0010656		-1.28918	0.000972857		-1.28847	0.00180244		-1.28887	8.69624e-05		-1.28562	0.000937919		-1.28291	0.00084077		-1.28514	0.000532803		-1.2809	0.000866025		-1.29003	0.000652522		-1.2828	0.00136747		-1.28284	0.000997109		-1.28853	0.00119046		-1.28508	0.00116447
-1.27814	0.00486936		-1.28036	0.0035382		-1.27846	0.00108849		-1.28334	0.00100349		-1.28386	0.000491832		-1.28191	0.00121682		-1.28355	0.000544234		-1.28125	0.000741483		-1.2751	0.000563704		-1.28077	0.000755471		-1.2734	0.0010701		-1.28441	0.00123718		-1.27717	0.0009853		-1.27784	0.00132172		-1.28072	0.000836271		-1.27945	0.000464892
-1.27252	0.00359833		-1.27567	0.00323162		-1.2719	0.00118464		-1.27552	0.000572339		-1.27605	0.000829208		-1.2741	0.000860109		-1.27574	0.000544234		-1.27531	0.000921901		-1.26979	0.00194205		-1.27421	0.00125264		-1.2659	0.000976269		-1.27629	0.000745832		-1.26905	0.000795035		-1.27346	0.000978328		-1.2751	0.000568498		-1.27164	0.000858553
-1.26439	0.0030758		-1.27098	0.00290204		-1.26409	0.00160438		-1.26834	0.000758427		-1.26886	0.00126147		-1.26816	0.000304097		-1.26949	0.000793631		-1.26719	0.0013428		-1.26541	0.00213193		-1.2664	0.000546194		-1.26153	0.000903263		-1.26941	0.000613588		-1.2628	0.000856894		-1.26596	0.00047145		-1.27072	0.000276284		-1.26445	0.00127816
-1.25783	0.00342354		-1.26317	0.00341329		-1.25815	0.00220588		-1.26396	0.00114088		-1.26449	0.00105957		-1.2641	0.00116223		-1.26512	0.000223021		-1.26093	0.00101843		-1.25885	0.00173923		-1.26046	0.000374712		-1.25747	0.000934621		-1.26535	0.000778023		-1.25842	0.000950152		-1.25815	0.000652859		-1.26447	0.000819467		-1.26008	0.00173173
-1.25408	0.00270109		-1.25567	0.00337257		-1.25409	0.00139964		-1.25896	0.00118467		-1.25949	0.00156247		-1.25816	0.0015913		-1.2598	0.000781096		-1.25687	0.00098471		-1.25072	0.00203751		-1.2564	0.000651588		-1.25059	0.00113306		-1.26004	0.000488304		-1.2528	0.00155399		-1.25315	0.00127733		-1.25635	0.00079808		-1.25508	0.00137628
-1.24908	0.00364974		-1.25098	0.00347321		-1.24815	0.00140612		-1.25146	0.000871018		-1.25168	0.00128414		-1.25003	0.00128304		-1.2523	0.000949798		-1.25093	0.00149582		-1.24541	0.00262398		-1.25046	0.00105891		-1.24309	0.000907428		-1.2516	0.000968342		-1.24467	0.00132037		-1.24878	0.000877593		-1.25041	0.00089694		-1.24758	0.00155695
-1.24158	0.00317221		-1.2463	0.00295163		-1.24002	0.0019131		-1.24396	0.000729385		-1.24449	0.00146864		-1.24347	0.000876552		-1.24512	0.00104015		-1.24281	0.00110464		-1.24135	0.00281749		-1.24233	0.00106885		-1.23778	0.00106177		-1.24504	0.00129656		-1.23811	0.000445435		-1.24159	0.000973633		-1.24635	0.00170593		-1.24008	0.00124985
-1.2347	0.00273399		-1.2388	0.0034595		-1.23346	0.00245356		-1.23928	0.00103745		-1.24043	0.00138166		-1.23941	0.000832703		-1.24043	0.000385455		-1.23656	0.00109747		-1.23447	0.00240253		-1.23577	0.00116949		-1.2334	0.00182343		-1.24128	0.00118324		-1.23436	0.000404898		-1.23378	0.00161924		-1.2401	0.000553659		-1.23539	0.000652877
-1.23033	0.00381744		-1.23098	0.00316326		-1.2294	0.0010523		-1.23459	0.00117685		-1.23574	0.00162046		-1.23379	0.00120564		-1.23574	0.000919504		-1.23281	0.000526921		-1.22635	0.0017563		-1.23171	0.000769941		-1.22684	0.00132194		-1.2366	0.000810649		-1.22936	0.00142628		-1.22909	0.00162116		-1.23197	0.000446288		-1.23071	0.000647216
-1.22533	0.00391615		-1.22661	0.00318921		-1.22377	0.001764		-1.22709	0.000924856		-1.22855	0.00171772		-1.22566	0.00086252		-1.22824	0.000764904		-1.22781	0.000426806		-1.22072	0.00202794		-1.22608	0.0010222		-1.21903	0.0011164		-1.2291	0.000633598		-1.22186	0.00100639		-1.22534	0.00176223		-1.22572	0.000540565		-1.22321	0.000388943
-1.21814	0.003286		-1.22286	0.00397981		-1.21565	0.00214754		-1.21959	0.000795287		-1.22136	0.000828417		-1.2191	0.000897381		-1.22043	0.000752891		-1.22	0.00107892		-1.21729	0.00150976		-1.21796	0.0012656		-1.21309	0.00100934		-1.22222	0.000944634		-1.21529	0.00151415		-1.21877	0.000680817		-1.22197	0.000669323		-1.2154	0.00061679
-1.21033	0.00264283		-1.21598	0.00342975		-1.20909	0.00279226		-1.2149	0.000787245		-1.21668	0.00127386		-1.21535	0.00095307		-1.21543	0.00114279		-1.21343	0.00127957		-1.21135	0.000877247		-1.2114	0.000961292		-1.20903	0.000399817		-1.21753	0.000972257		-1.21061	0.000700606		-1.21127	0.000829786		-1.21697	0.000781058		-1.21102	0.0014126
-1.20533	0.00285554		-1.20848	0.00281575		-1.20534	0.00144448		-1.21115	0.00105174		-1.21199	0.000630472		-1.21035	0.00111312		-1.21105	0.00104172		-1.20875	0.00145367		-1.20385	0.00175061		-1.20764	0.000286163		-1.20278	0.000709724		-1.21285	0.000759535		-1.20561	0.000618829		-1.20565	0.000841951		-1.20916	0.000123738		-1.20696	0.00129986
-1.20095	0.00343519		-1.20317	0.00280435		-1.20034	0.00147743		-1.20427	0.00114401		-1.20511	0.000586719		-1.20285	0.0008919		-1.20355	0.000883727		-1.20375	0.00142416		-1.19791	0.00169448		-1.20265	0.000125048		-1.19465	0.00152014		-1.20566	0.000783461		-1.19842	0.00164982		-1.20128	0.0014453		-1.2026	0.000571772		-1.20008	0.00158195
-1.19408	0.00428057		-1.1988	0.00336286		-1.19284	0.00140856		-1.19677	0.00143889		-1.1973	0.00131445		-1.19597	0.00138872		-1.19574	0.00188001		-1.19656	0.00147454		-1.19354	0.00188876		-1.19515	0.000105826		-1.1884	0.00118598		-1.19785	0.000591185		-1.19061	0.00135458		-1.19533	0.00144124		-1.19791	0.000901741		-1.19289	0.00102154
-1.18595	0.00478483		-1.19223	0.00301092		-1.18596	0.0022229		-1.19146	0.00101287		-1.19168	0.00183817		-1.1916	0.00117868		-1.19106	0.00105661		-1.18906	0.00134723		-1.18791	0.00270935		-1.18827	0.00100686		-1.18434	0.000965489		-1.19254	0.000771933		-1.18561	0.000479177		-1.18721	0.00103019		-1.19291	0.000907415		-1.18758	0.000590373
-1.18064	0.0033077		-1.18442	0.00349537		-1.18127	0.00167082		-1.18709	0.000845551		-1.18761	0.00100765		-1.1866	0.000755747		-1.18731	0.000415226		-1.18406	0.000583828		-1.1801	0.00245712		-1.18358	0.00055548		-1.1784	0.00141357		-1.18816	0.00119216		-1.18123	0.001606		-1.18065	0.0012498		-1.18541	0.00167713		-1.18321	0.000722694
-1.17658	0.00424721		-1.17848	0.00314807		-1.17627	0.00219211		-1.18053	0.000704589		-1.18136	0.00064207		-1.17941	0.000800254		-1.18074	0.000647649		-1.17937	0.000925062		-1.17291	0.00201604		-1.17858	5.3561e-05		-1.17028	0.000872885		-1.1816	0.000875032		-1.17436	0.00150947		-1.17659	0.00112153		-1.17791	0.00103683		-1.17665	0.000358045
-1.1697	0.00399726		-1.17411	0.00333585		-1.16909	0.00161302		-1.17271	0.000951664		-1.17324	0.00102821		-1.1716	0.00108155		-1.17324	0.000867013		-1.1725	0.000572658		-1.16854	0.00165489		-1.1714	0.000460453		-1.16403	0.000743287		-1.17379	0.000738655		-1.16623	0.00102302		-1.17128	0.00126154		-1.17291	0.00082165		-1.16852	0.0009654
-1.16158	0.00424036		-1.16817	0.00313245		-1.16159	0.00184287		-1.16646	0.000965738		-1.1673	0.000672644		-1.1666	0.000962278		-1.16793	0.000648954		-1.16468	0.000984288		-1.16354	0.00200698		-1.1639	0.000941207		-1.16028	0.000930947		-1.16785	0.0015356		-1.16092	0.000664755		-1.16315	0.000764479		-1.16853	0.00110775		-1.16258	0.000852892
-1.15627	0.00331341		-1.16036	0.00275371		-1.15659	0.00235741		-1.1624	0.000721343		-1.16324	0.000743282		-1.16222	0.00107453		-1.16356	0.000656266		-1.15937	0.00101738		-1.15573	0.00223283		-1.1589	0.000605802		-1.15528	0.0014998		-1.16378	0.0011256		-1.15686	0.00124656		-1.15627	0.00101226		-1.16135	0.000779312		-1.15852	0.0010397
-1.15283	0.00272051		-1.15379	0.00323415		-1.15221	0.00188933		-1.15678	0.000996119		-1.15699	0.00116579		-1.15535	0.000791704		-1.15731	0.000696222		-1.15531	0.00130592		-1.14854	0.00188772		-1.15452	0.0008032		-1.14778	0.00174724		-1.15722	0.000788029		-1.14998	0.00205402		-1.1519	0.00118236		-1.15354	0.000770583		-1.15258	0.00110456
-1.14689	0.00348318		-1.14942	0.00270898		-1.14534	0.00209892		-1.14896	0.000621039		-1.14855	0.000916451		-1.14722	0.000914482		-1.14949	0.000185677		-1.14812	0.000805557		-1.14385	0.00154081		-1.14765	0.000682256		-1.1409	0.00145644		-1.14878	0.0002373		-1.14186	0.0018675		-1.14659	0.00117382		-1.14822	0.00104861		-1.14446	0.00121848
-1.13908	0.00362506		-1.14379	0.00218044		-1.13721	0.00185827		-1.14209	0.00106984		-1.14261	0.000405906		-1.14191	0.000813409		-1.14324	0.000692827		-1.14	0.000592048		-1.13916	0.00184892		-1.13952	0.00127424		-1.13622	0.00108039		-1.14316	0.000311905		-1.13654	0.00134685		-1.13878	0.00160771		-1.14416	0.00159594		-1.1379	0.000911386
-1.13314	0.00342628		-1.13567	0.00351541		-1.1319	0.00177454		-1.13802	0.00111474		-1.13918	0.000209279		-1.13785	0.00141897		-1.13887	0.00136581		-1.135	0.000807875		-1.13166	0.00200284		-1.13421	0.00166061		-1.13121	0.00116172		-1.13972	0.000784766		-1.13311	0.00126624		-1.13159	0.00120135		-1.13697	0.0013225		-1.13383	0.00206784
-1.12877	0.00379368		-1.12911	0.00330273		-1.12784	0.00128269		-1.1324	0.000870348		-1.13355	0.000928312		-1.13097	0.00120542		-1.13324	0.00122244		-1.13124	0.00158645		-1.12385	0.00193455		-1.13014	0.00164312		-1.12403	0.0015025		-1.13378	0.000282759		-1.12686	0.000805345		-1.12752	0.000776431		-1.12885	0.000919636		-1.12821	0.00131377
-1.12314	0.00309179		-1.12567	0.00353335		-1.12096	0.00165164		-1.12428	0.00134506		-1.12605	0.00127201		-1.12285	0.00120411		-1.12543	0.00114096		-1.125	0.000959417		-1.11947	0.00214927		-1.12327	0.00100297		-1.11653	0.00106569		-1.12628	0.000100271		-1.11936	0.00103099		-1.12315	0.000788169		-1.12385	5.89231e-05		-1.12008	0.000523858
-1.11533	0.00317724		-1.12067	0.00298897		-1.11252	0.001018		-1.1174	0.00113038		-1.11949	0.0016086		-1.11753	0.00140472		-1.11856	0.00113182		-1.1175	0.000685208		-1.11541	0.00151985		-1.11514	0.000520925		-1.11153	0.00151181		-1.12035	0.000306033		-1.11342	0.00152891		-1.11597	0.000998817		-1.1201	0.000726063		-1.11352	0.000602638
-1.10845	0.00368401		-1.11317	0.00245515		-1.10752	0.0017713		-1.11365	0.00135869		-1.11511	0.00185241		-1.1141	0.00101402		-1.11418	0.000987403		-1.11187	0.000604905		-1.10854	0.00169939		-1.10983	0.000925225		-1.10684	0.00136629		-1.11597	0.000589662		-1.10904	0.000975224		-1.10878	0.00123785		-1.11385	0.00116537		-1.10977	0.000979788
-1.10408	0.00467424		-1.1063	0.00338649		-1.10377	0.00250326		-1.10896	0.00115585		-1.11011	0.000958097		-1.10785	0.0014569		-1.10887	0.00127858		-1.10719	0.000796915		-1.10135	0.00173483		-1.10639	0.000235842		-1.09996	0.000809679		-1.11035	0.00112864		-1.10311	0.000766917		-1.10377	0.00134328		-1.10603	0.00127187		-1.10477	0.00123617
-1.09908	0.00396892		-1.10161	0.00320968		-1.09784	0.00160032		-1.10146	0.00118668		-1.1023	0.00177228		-1.10035	0.00152925		-1.10074	0.00147392		-1.10125	0.000820521		-1.09604	0.00195731		-1.10015	0.000254199		-1.09215	0.000622754		-1.10253	0.00116171		-1.0953	0.000814952		-1.0994	0.000574106		-1.10041	0.00123215		-1.09727	0.0013225
-1.09127	0.00317861		-1.09661	0.00273472		-1.09034	0.00254782		-1.09459	0.00162788		-1.09511	0.00112125		-1.09441	0.00164195		-1.09356	0.000291442		-1.09343	0.000950354		-1.09166	0.00106351		-1.09265	0.000817455		-1.08684	0.00159363		-1.09566	0.000366717		-1.08842	0.00169317		-1.09253	9.28387e-05		-1.09603	0.00065361		-1.0904	0.00136
-1.08377	0.00259416		-1.08942	0.00238658		-1.0844	0.0030737		-1.09021	0.00211667		-1.09043	0.000754089		-1.09003	0.00128326		-1.0898	0.000151466		-1.08687	0.000721038		-1.0851	0.00213995		-1.08671	0.00143816		-1.08247	0.00133493		-1.09129	0.00076345		-1.08405	0.00145229		-1.0844	0.000820822		-1.0901	0.000985543		-1.0857	0.00126471
-1.07939	0.00308973		-1.08161	0.00277418		-1.08002	0.00177751		-1.08521	0.00179744		-1.08574	0.00107038		-1.08441	0.00124489		-1.08543	0.000984791		-1.0825	0.000760031		-1.07729	0.00220929		-1.08233	0.000810327		-1.07559	0.00115021		-1.08628	0.000874814		-1.07905	0.00209713		-1.07877	0.00114416		-1.08197	0.000872935		-1.08102	0.000979788
-1.0747	0.00397578		-1.07661	0.00232835		-1.07409	0.000803538		-1.07803	0.00135847		-1.07855	0.000258568		-1.0766	0.00104099		-1.07793	0.00051159		-1.07718	0.000888389		-1.07104	0.00210218		-1.07639	0.000525028		-1.06746	0.00148902		-1.07847	0.00139357		-1.07123	0.00145956		-1.07471	0.00103083		-1.07541	0.000767964		-1.07383	0.00101918
-1.06689	0.00379619		-1.07254	0.00266404		-1.06627	0.000413788		-1.07021	0.000893581		-1.07074	0.000955197		-1.06972	0.000806832		-1.07105	0.000984269		-1.06968	0.000701437		-1.06697	0.00255594		-1.06858	0.000502567		-1.06247	0.000948585		-1.07097	0.00128025		-1.06373	0.000814952		-1.06847	0.00150441		-1.07103	0.00142441		-1.06602	0.000612308
-1.05939	0.00377586		-1.06567	0.0023965		-1.0594	0.00112495		-1.06521	0.00138594		-1.06574	0.00180127		-1.06535	0.00111049		-1.06606	0.000600381		-1.0625	0.000947193		-1.06104	0.00258078		-1.06202	0.000762166		-1.05872	0.00130994		-1.06629	0.00076345		-1.05904	0.000975224		-1.06034	0.00159619		-1.06572	0.00112761		-1.06102	0.000762555
-1.05502	0.00453601		-1.05754	0.00257479		-1.05502	0.00186637		-1.06084	0.000687387		-1.06136	0.0012251		-1.06003	0.00105721		-1.06137	0.00117465		-1.05812	0.00126756		-1.05291	0.00183133		-1.05764	0.00159517		-1.05246	0.000984843		-1.06191	0.00045807		-1.05436	0.001113		-1.0544	0.000785394		-1.05791	0.000751815		-1.05664	0.00111494
-1.05095	0.0041645		-1.05223	0.00277186		-1.05002	0.0017902		-1.05396	0.00116054		-1.05418	0.000343702		-1.05222	0.000887953		-1.05449	0.000737745		-1.05312	0.00101295		-1.04666	0.000877764		-1.05233	0.00109714		-1.04496	0.000732998		-1.0541	0.000595535		-1.04686	0.00140801		-1.05034	0.00073588		-1.05103	0.000686781		-1.04977	0.00106682
-1.04408	0.00424516		-1.04786	0.00239903		-1.04221	0.00221506		-1.04584	0.00077116		-1.04636	0.000547973		-1.04504	0.000640203		-1.04668	0.000334793		-1.04531	0.000702069		-1.0426	0.00146009		-1.04483	0.00111485		-1.03903	0.000292023		-1.0466	0.00051484		-1.03936	0.00113151		-1.04409	0.000659902		-1.04666	0.0004967		-1.04164	0.00155176
-1.03689	0.00447135		-1.04098	0.00261045		-1.03502	0.00106256		-1.04052	0.000739215		-1.04168	0.00105905		-1.04066	0.000800912		-1.04137	0.000388328		-1.03812	0.00052671		-1.03666	0.00139775		-1.03765	0.00151353		-1.03497	0.000672731		-1.04222	0.000933324		-1.03498	0.000882669		-1.03565	0.00126111		-1.04135	0.000290469		-1.03602	0.00214921
-1.03158	0.00381493		-1.03286	0.00287525		-1.03065	0.00120274		-1.03646	0.000832818		-1.03761	0.000688986		-1.03597	0.00127756		-1.03699	0.000293531		-1.03406	0.000329009		-1.02854	0.00144328		-1.03296	0.00148502		-1.02903	0.00068645		-1.03816	0.000592055		-1.03092	0.000619298		-1.03003	0.0014645		-1.03353	0.000605598		-1.03196	0.00169847
-1.0272	0.00317016		-1.02755	0.00275371		-1.02565	0.00121301		-1.02959	0.000797744		-1.03105	0.000760942		-1.02816	0.000497035		-1.03043	0.00115924		-1.02937	0.000771201		-1.02197	0.00149347		-1.02827	0.000671457		-1.02121	0.000926537		-1.03128	0.000893955		-1.02373	0.000931407		-1.02659	0.00109678		-1.02635	0.000910471		-1.02508	0.000963513
-1.02064	0.00356017		-1.02411	0.0031333		-1.01784	0.000876734		-1.02146	0.000923516		-1.02355	0.000559834		-1.02066	0.000474014		-1.0223	0.00114905		-1.0225	0.000786587		-1.01854	0.00112198		-1.02046	0.000425465		-1.01434	0.00100616		-1.02378	0.000520712		-1.01655	0.00121071		-1.02096	0.000886556		-1.02228	0.000540346		-1.01696	0.000534001
-1.01283	0.00433403		-1.01817	0.00312591		-1.01065	0.000837571		-1.01584	0.00103454		-1.01824	0.00135082		-1.0166	0.000867344		-1.01637	0.000289353		-1.01531	0.00129854		-1.01354	0.00111344		-1.01296	0.00114724		-1.00996	0.000732508		-1.01879	0.000475036		-1.01124	0.0010563		-1.01315	0.000577948		-1.01791	0.0010545		-1.01165	0.00037031
-1.00658	0.00400411		-1.01036	0.00255116		-1.00627	0.00111361		-1.0124	0.00125079		-1.01386	0.00131208		-1.01253	0.000803104		-1.0123	0.00102501		-1.01	0.00158898		-1.00572	0.00191644		-1.00858	0.00143622		-1.00465	0.00118696		-1.01441	0.000676882		-1.00686	0.000973584		-1.0069	0.000833414		-1.01072	0.000640952		-1.0082	0.000687786
-1.00252	0.00528223		-1.00442	0.00295543		-1.00221	0.00162085		-1.00646	0.000688281		-1.00761	0.00153823		-1.00535	0.00151171		-1.00605	0.0012099		-1.00562	0.00167266		-0.999163	0.00155167		-1.00452	0.00154355		-0.996838	0.00166835		-1.00785	0.000548553		-0.999982	0.000979676		-1.00252	0.00107117		-1.00353	0.000570681		-1.00196	0.000700522
-0.996579	0.00476769		-1.00005	0.00325145		-0.995025	0.00243438		-0.99865	0.000756193		-0.999488	0.00145863		-0.997847	0.00126506		-0.997931	0.00136737		-0.998745	0.00123321		-0.994474	0.00135972		-0.997332	0.000752879		-0.989651	0.00133223		-1.00003	0.000543768		-0.992169	0.00126671		-0.997214	0.000969364		-0.998533	0.000803972		-0.994457	0.000739676
-0.988454	0.00401371		-0.994419	0.00334704		-0.987837	0.00165029		-0.992714	0.00106761		-0.993238	0.00123828		-0.992846	0.00099977		-0.992304	0.000555463		-0.990933	0.0010412		-0.989475	0.00208873		-0.990145	0.00103084		-0.985276	0.00108088		-0.993785	0.000296897		-0.986234	0.00159522		-0.989715	0.00107138		-0.994161	0.000818594		-0.988521	0.000582825
-0.982204	0.00293619		-0.986606	0.00358462		-0.982525	0.00133914		-0.988339	0.00115741		-0.988864	0.000884032		-0.988471	0.00111334		-0.988554	0.000399035		-0.984997	0.00095731		-0.982286	0.00196559		-0.984835	0.00108677		-0.980278	0.000914287		-0.989726	0.000555296		-0.982171	0.00141222		-0.982215	0.000866922		-0.987283	0.000994709		-0.984454	0.000877422
-0.977829	0.00410281		-0.979732	0.002836		-0.978149	0.00173159		-0.983025	0.00110603		-0.98355	0.000699529		-0.98191	0.00121419		-0.982929	0.000789975		-0.980934	0.00124606		-0.974787	0.00146579		-0.980455	0.00128071		-0.972466	0.00105589		-0.983783	0.000656002		-0.975922	0.00158913		-0.977523	0.00119581		-0.979158	0.00103814		-0.978519	0.000797463
-0.972204	0.00436876		-0.975357	0.00242477		-0.971587	0.00191175		-0.975212	0.000988524		-0.975738	0.00122141		-0.973784	0.000885322		-0.975117	0.000665929		-0.974686	0.000975225		-0.969788	0.00130927		-0.973894	0.000659579		-0.965279	0.000683511		-0.975657	0.000711901		-0.967797	0.00137426		-0.972839	0.000722435		-0.973848	0.00131398		-0.970706	0.000650519
-0.964079	0.00368698		-0.970043	0.00252141		-0.963775	0.00239198		-0.968025	0.00140382		-0.968864	0.00121456		-0.968161	0.00130014		-0.969179	0.000786319		-0.966873	0.000813144		-0.965099	0.00155969		-0.966082	0.00107662		-0.961216	0.000731773		-0.969409	0.000753663		-0.961545	0.00107996		-0.965652	0.000998176		-0.969785	0.000483606		-0.963832	0.000600043
-0.957829	0.00242166		-0.96223	0.0026978		-0.957837	0.00182396		-0.96365	0.000994332		-0.964488	0.00082051		-0.963786	0.000924568		-0.964804	0.00118065		-0.960934	0.000949301		-0.958225	0.00172992		-0.960146	0.000919609		-0.956841	0.000679591		-0.96535	0.000958119		-0.957482	0.00080183		-0.957839	0.00108845		-0.96322	0.000831252		-0.959453	0.000958324
-0.954079	0.00314434		-0.955043	0.00266024		-0.953774	0.00196793		-0.958649	0.00119628		-0.959176	0.00133395		-0.957534	0.0008452		-0.959179	0.00113756		-0.956558	0.000678042		-0.950413	0.00170819		-0.956079	0.000378383		-0.949654	0.000627654		-0.959407	0.000564431		-0.951859	0.000756373		-0.952834	0.00166747		-0.955099	0.00167429		-0.954456	0.00114324
-0.949079	0.00295242		-0.950668	0.00270919		-0.947525	0.000858908		-0.951149	0.00138282		-0.951364	0.000748027		-0.949721	0.000823275		-0.951679	0.000182804		-0.95031	0.00044725		-0.945099	0.00209934		-0.949831	0.00058982		-0.942463	0.00060732		-0.951282	0.000758665		-0.943734	0.00123508		-0.948463	0.00154902		-0.949159	0.00112914		-0.946643	0.00118263
-0.941579	0.00268601		-0.945984	0.00234586		-0.9394	0.00147095		-0.943649	0.000966408		-0.944175	0.00102953		-0.943473	0.000969294		-0.944493	0.000466411		-0.942185	5.88045e-05		-0.940725	0.00245194		-0.941706	0.000870368		-0.937466	0.000755047		-0.94472	0.00059597		-0.937169	0.00212759		-0.941276	0.00093479		-0.945409	0.000402423		-0.939143	0.00142156
-0.934704	0.00258891		-0.938171	0.00293032		-0.933149	0.00215537		-0.938961	0.000381559		-0.940425	0.00155615		-0.93941	0.000857039		-0.940117	0.00101326		-0.936245	0.00126356		-0.933849	0.00222558		-0.93577	0.00063971		-0.933091	0.000667587		-0.941287	0.00102859		-0.933419	0.00130397		-0.933463	0.000562581		-0.938848	0.000588358		-0.934772	0.000801709
-0.930329	0.00327572		-0.930671	0.00324323		-0.929087	0.00150903		-0.934277	0.00075798		-0.935739	0.00185056		-0.933471	0.00145866		-0.935118	0.00129216		-0.932808	0.00115417		-0.925724	0.00211693		-0.931711	0.000791106		-0.926216	0.000653622		-0.936282	0.000548118		-0.928422	0.00124258		-0.928779	0.00072713		-0.930723	0.0010425		-0.93008	0.000611129
-0.925329	0.00359787		-0.926296	0.00271721		-0.92315	0.0014434		-0.926464	0.00110648		-0.928239	0.00159595		-0.925345	0.00142292		-0.927618	0.00164654		-0.927185	0.000870262		-0.920412	0.00161454		-0.925455	0.00051207		-0.918091	0.000941726		-0.92847	0.000686018		-0.920922	0.00151485		-0.924712	0.000937564		-0.924783	0.000956954		-0.922267	0.000406633
-0.918142	0.00320375		-0.922233	0.00250284		-0.915025	0.000907526		-0.918965	0.000706152		-0.921363	0.000968903		-0.919097	0.00166058		-0.920117	0.000881638		-0.919685	0.00111981		-0.916975	0.00198474		-0.91733	0.000689383		-0.912464	0.00151524		-0.921908	0.000693196		-0.914357	0.00105419		-0.918151	0.00150079		-0.921346	0.000566534		-0.914768	0.00102885
-0.910329	0.00330542		-0.915355	0.00226821		-0.908774	0.000374624		-0.914902	0.00103365		-0.916677	0.00130733		-0.915347	0.000878964		-0.915118	0.00106575		-0.91312	0.000772044		-0.910725	0.00155633		-0.911081	0.000830629		-0.908089	0.00117961		-0.917224	0.00036215		-0.909673	0.001296		-0.910651	0.00139151		-0.915723	0.00108659		-0.910396	0.00125198
-0.905329	0.00367373		-0.907856	0.00215364		-0.905024	0.00189824		-0.910839	0.00105979		-0.911988	0.00143069		-0.910346	0.000695235		-0.910742	0.000978002		-0.908745	0.000346925		-0.903225	0.00245919		-0.907335	0.000762598		-0.901841	0.000879989		-0.912219	0.000789986		-0.904672	0.0012482		-0.905341	0.00100309		-0.908224	0.000881009		-0.906329	0.00131448
-0.900954	0.00306826		-0.902546	0.00249081		-0.900024	0.00131942		-0.903961	0.00121862		-0.904801	0.00126463		-0.902533	0.0010024		-0.903242	0.000413137		-0.903435	0.000982391		-0.8976	0.00244367		-0.90233	0.0010412		-0.893715	0.00106936		-0.905032	0.000604018		-0.897172	0.000841664		-0.900962	0.00172872		-0.901658	0.000609308		-0.899143	0.00128052
-0.894079	0.00268715		-0.89817	0.00223677		-0.892525	0.00153037		-0.896462	0.00135802		-0.8973	0.00138746		-0.895972	0.00164523		-0.89543	0.000795459		-0.895935	0.00152006		-0.893225	0.0027197		-0.894831	0.000870368		-0.887776	0.00113233		-0.897532	0.000223815		-0.889672	0.00109613		-0.894714	0.00110809		-0.897283	0.000783895		-0.891956	0.00117367
-0.885954	0.00331844		-0.891609	0.00170232		-0.885962	0.00214268		-0.891464	0.00135958		-0.891675	0.000282816		-0.891597	0.00188904		-0.891054	0.000578444		-0.888748	0.00171502		-0.887287	0.00253318		-0.888269	0.00101334		-0.883713	0.000576207		-0.892535	0.000535938		-0.884671	0.00117041		-0.886588	0.00143057		-0.891973	0.000621966		-0.886958	0.00122462
-0.880641	0.00277352		-0.883484	0.00261066		-0.881274	0.00167001		-0.887089	0.00108726		-0.887612	0.000523988		-0.886596	0.00102126		-0.886992	0.00105504		-0.88406	0.00190134		-0.879475	0.00153046		-0.883585	0.000718107		-0.877465	0.00106005		-0.888164	0.000581397		-0.880296	0.00133443		-0.88034	0.00185016		-0.884473	0.000846092		-0.882266	0.00113027
-0.876579	0.00302599		-0.877857	0.00228931		-0.876275	0.00192444		-0.880524	0.00133233		-0.881051	0.00125699		-0.879096	0.000879183		-0.880118	0.00102971		-0.879372	0.0012488		-0.872911	0.00108628		-0.87858	0.000547489		-0.869339	0.0013315		-0.881282	0.00108754		-0.873422	0.000862049		-0.876273	0.000969791		-0.876974	0.000601452		-0.875705	0.000929548
-0.869704	0.00313794		-0.873481	0.00329935		-0.868774	0.00167136		-0.872399	0.00131692		-0.873239	0.000661838		-0.871596	0.000984422		-0.872618	0.000648693		-0.872185	0.000655911		-0.868538	0.00152658		-0.87108	0.00098073		-0.863091	0.000530394		-0.873157	0.00142097		-0.865296	0.00117931		-0.87065	0.000527153		-0.872285	0.00103072		-0.867893	0.000602166
-0.861579	0.00274244		-0.867546	0.00312232		-0.861275	0.000915088		-0.866463	0.000562956		-0.867301	0.00113258		-0.866599	0.00081034		-0.867304	0.000621795		-0.864372	0.000980283		-0.863224	0.0018453		-0.863581	0.000989585		-0.859654	0.000234451		-0.867846	0.0010647		-0.859982	0.000811906		-0.862525	0.00108675		-0.867597	0.0016948		-0.861957	0.000792274
-0.856266	0.00369955		-0.85942	0.00205468		-0.856587	0.00126675		-0.8624	0.000531457		-0.863238	0.00132737		-0.862224	0.00121244		-0.863241	0.00103885		-0.859371	0.000688369		-0.855411	0.00217436		-0.858896	0.00113925		-0.85434	0.000428725		-0.863788	0.000634904		-0.85592	0.00110527		-0.855651	0.00127136		-0.86041	0.00082165		-0.85789	0.0011397
-0.852829	0.00316742		-0.853168	0.00237962		-0.8519	0.00175185		-0.856465	0.000649187		-0.856988	0.0013901		-0.855033	0.00157771		-0.85668	0.000518119		-0.854996	0.000806821		-0.848225	0.0015258		-0.854212	0.00120599		-0.84684	0.00078273		-0.856914	0.000801732		-0.848733	0.00150829		-0.851585	0.00133197		-0.852598	0.00103705		-0.851642	0.00152464
-0.846579	0.003769		-0.849106	0.00286006		-0.845025	0.0016611		-0.848339	0.000911229		-0.84855	0.00128467		-0.84722	0.00144703		-0.848868	0.000780051		-0.847809	0.000916421		-0.843536	0.00172371		-0.84733	0.00155522		-0.840279	0.00070017		-0.848788	0.000347359		-0.840608	0.00113362		-0.846275	0.00130999		-0.847597	0.00111605		-0.843517	0.00114466
-0.839079	0.0042712		-0.843483	0.0025404		-0.837213	0.000768156		-0.842087	0.000424227		-0.842925	0.000492095		-0.84191	0.00145252		-0.842617	0.0007367		-0.839996	0.000862464		-0.83885	0.00251145		-0.839518	0.000973603		-0.835591	0.00068645		-0.843471	0.000426967		-0.835606	0.00138411		-0.838149	0.00122376		-0.843221	0.000806591		-0.836955	0.000543907
-0.833142	0.00321905		-0.835045	0.00289002		-0.8319	0.00145879		-0.837712	0.000885315		-0.839488	0.000778338		-0.837848	0.00097631		-0.838555	0.000815567		-0.835308	0.000775627		-0.831037	0.00214823		-0.834207	0.00106409		-0.83059	0.000890524		-0.840037	0.000387815		-0.832169	0.000948278		-0.831275	0.000820609		-0.835721	0.000579192		-0.833209	0.00089063
-0.828766	0.00285668		-0.828796	0.00240283		-0.827837	0.00186529		-0.832089	0.00131669		-0.833863	0.000848713		-0.830974	0.000750046		-0.83293	0.000480513		-0.831558	0.000963422		-0.823538	0.00150252		-0.830149	0.000633662		-0.82309	0.00106569		-0.833781	0.000617286		-0.825921	0.000906569		-0.827529	0.00102123		-0.827909	0.000830161		-0.827266	0.000891338
-0.823141	0.00304564		-0.825046	0.00244608		-0.82065	0.00201978		-0.823963	0.0010198		-0.826051	0.0011737		-0.822848	0.000860328		-0.824805	0.000920549		-0.824997	0.00117524		-0.819475	0.00104902		-0.822962	0.000330221		-0.81559	0.000706294		-0.826282	0.000666659		-0.818108	0.00126484		-0.822837	0.000836829		-0.822908	0.000618474		-0.819141	0.00102059
-0.815329	0.00325767		-0.820045	0.00276532		-0.812838	0.00158142		-0.817402	0.000738098		-0.8198	0.000545338		-0.817847	0.00071979		-0.818243	0.000861007		-0.817497	0.00135861		-0.8151	0.00108628		-0.815149	0.000548137		-0.810902	0.000264585		-0.820346	0.000994008		-0.812169	0.00149822		-0.815337	0.000662676		-0.819471	0.000708168		-0.812892	0.00106635
-0.808454	0.00379117		-0.812233	0.00271679		-0.807837	0.00204274		-0.813648	0.000908325		-0.815425	0.00134186		-0.814097	0.000423367		-0.814181	0.0008503		-0.811871	0.000738954		-0.808226	0.00184064		-0.809832	0.000976842		-0.806214	0.000677386		-0.815974	0.0011206		-0.80811	0.00125687		-0.808463	0.000673561		-0.812909	0.000597305		-0.809146	0.00129373
-0.804078	0.00419375		-0.805671	0.00233489		-0.804087	0.00233121		-0.808651	0.000803329		-0.8098	0.00123169		-0.807849	0.00120455		-0.808554	0.000521514		-0.807495	0.00101253		-0.800724	0.0022054		-0.806398	0.000717675		-0.799027	0.00110342		-0.810344	0.000964209		-0.802171	0.00120813		-0.803779	0.00098964		-0.805097	0.000544711		-0.804141	0.00140199
-0.798766	0.00291517		-0.801296	0.00256825		-0.797837	0.00228475		-0.801151	0.00114356		-0.802301	0.000895893		-0.800036	0.00172022		-0.800431	0.000782923		-0.80156	0.00119632		-0.795725	0.00169473		-0.800142	0.000363265		-0.791214	0.00113036		-0.802531	0.000784766		-0.794358	0.00114768		-0.799087	0.00111577		-0.799783	0.000527689		-0.796642	0.00132109
-0.790954	0.00268692		-0.796295	0.0024887		-0.790025	0.00264749		-0.794586	0.00120187		-0.795114	0.00223802		-0.79441	0.00149878		-0.793867	0.000563559		-0.793747	0.000605116		-0.791349	0.00172448		-0.79233	0.000122024		-0.7859	0.000655337		-0.795657	0.000523105		-0.787484	0.00161561		-0.7919	0.000785394		-0.795408	0.000680234		-0.79008	0.00109348
-0.783766	0.0025231		-0.788795	0.00292504		-0.7844	0.00275904		-0.789902	0.000309179		-0.790738	0.00205352		-0.790034	0.00133303		-0.790118	0.00123001		-0.787186	0.000895133		-0.784475	0.00195524		-0.786707	0.00114098		-0.781842	0.00105785		-0.791286	0.000655132		-0.783421	0.00156031		-0.7844	0.0012355		-0.788846	0.000994927		-0.785396	0.000890394
-0.779392	0.00278677		-0.781295	0.0024809		-0.780024	0.00272501		-0.784901	0.000839519		-0.785739	0.00158435		-0.784099	0.000686903		-0.785116	0.00143188		-0.78281	0.00121171		-0.776663	0.00175087		-0.782335	0.000906219		-0.774651	0.000424071		-0.786288	0.000910703		-0.778108	0.00131194		-0.778777	0.00111684		-0.780721	0.00133974		-0.780391	0.00112272
-0.774391	0.00285486		-0.776294	0.00247393		-0.774087	0.002184		-0.777714	0.000875262		-0.778237	0.00180576		-0.776286	0.000900231		-0.777617	0.00086388		-0.777496	0.00131477		-0.771038	0.00220437		-0.776392	0.00149021		-0.766526	0.000584536		-0.778476	0.00126328		-0.770295	0.00197224		-0.774711	0.00143932		-0.774473	0.000862241		-0.772891	0.00128594
-0.766579	0.00219775		-0.771919	0.00283178		-0.766274	0.00261886		-0.769901	0.00101667		-0.770738	0.00203375		-0.769721	0.001114		-0.770743	0.000329308		-0.769684	0.00125829		-0.766975	0.00223102		-0.768579	0.000942503		-0.761841	0.000741817		-0.771281	0.000780851		-0.763108	0.00166365		-0.76815	0.000727557		-0.77041	0.000594468		-0.765392	0.00134373
-0.759391	0.00228823		-0.764732	0.00237582		-0.759712	0.00288545		-0.7649	0.00099947		-0.766051	0.00233317		-0.765345	0.00124883		-0.766054	0.00101926		-0.76281	0.000975857		-0.760725	0.0023764		-0.762018	0.00119908		-0.758091	0.00156767		-0.766597	0.000618808		-0.75842	0.00111581		-0.760024	0.000876099		-0.764783	0.00123608		-0.760394	0.000688965
-0.755328	0.00286445		-0.75692	0.0020684		-0.755337	0.00191634		-0.760525	0.00171769		-0.761676	0.00176596		-0.760035	0.00137709		-0.761368	0.0010096		-0.758434	0.00151585		-0.7526	0.00138869		-0.757647	0.00100816		-0.751526	0.00125359		-0.761912	0.000731694		-0.753732	0.00147057		-0.754089	0.000732892		-0.756658	0.00116777		-0.755702	0.00109819
-0.751267	0.00269926		-0.751606	0.00269105		-0.750025	0.00194794		-0.753651	0.00120321		-0.754176	0.000694258		-0.752223	0.0013885		-0.754179	0.0014418		-0.75312	0.00186783		-0.746349	0.00267236		-0.752336	0.00133471		-0.744026	0.00125286		-0.7541	0.00134332		-0.745919	0.00184055		-0.750022	0.000680177		-0.749784	0.00059927		-0.748828	0.000653349
-0.744079	0.00311966		-0.747543	0.00310122		-0.742212	0.00210595		-0.745526	0.00146815		-0.746364	0.00182684		-0.745036	0.00146019		-0.746367	0.00142613		-0.745308	0.000928856		-0.742287	0.0029546		-0.744524	0.00133946		-0.738404	0.000796694		-0.7466	0.00135289		-0.738419	0.00169223		-0.743774	0.00117212		-0.745721	0.000429702		-0.741016	0.0010588
-0.736579	0.00227657		-0.740356	0.00259652		-0.735337	0.00218643		-0.740212	0.00163056		-0.741675	0.00194703		-0.740661	0.00186558		-0.741368	0.00123993		-0.738121	0.00157676		-0.736349	0.00262734		-0.737642	0.000740353		-0.734028	0.00141798		-0.742221	0.000631859		-0.734357	0.00151767		-0.735336	0.0013181		-0.740411	0.000583557		-0.735706	0.00129656
-0.731579	0.00322705		-0.732231	0.00268198		-0.730962	0.0023123		-0.736149	0.00141119		-0.737926	0.00193807		-0.735659	0.00165379		-0.736992	0.00182621		-0.734058	0.00204719		-0.727913	0.00247186		-0.733271	0.000686792		-0.728089	0.00184205		-0.738162	0.00052702		-0.729985	0.00079152		-0.729713	0.00113199		-0.732286	0.000951062		-0.731334	0.00104276
-0.727204	0.00440395		-0.727234	0.00307865		-0.72565	0.00217374		-0.729275	0.00205814		-0.731052	0.00169347		-0.727847	0.00137205		-0.730429	0.00158909		-0.729683	0.00121171		-0.721662	0.00235804		-0.728273	0.00123946		-0.719963	0.000915268		-0.730975	0.00126045		-0.722794	0.00135247		-0.726272	0.00130593		-0.725408	0.00102788		-0.724452	0.00171192
-0.720641	0.0036783		-0.723484	0.00300564		-0.717837	0.00236551		-0.720837	0.00208405		-0.723863	0.00207276		-0.72066	0.00173688		-0.722306	0.00119946		-0.722183	0.000960261		-0.718225	0.00207683		-0.720461	0.000830197		-0.713402	0.00103629		-0.723788	0.00136247		-0.715608	0.00149775		-0.720336	0.0017046		-0.721658	0.00148028		-0.716327	0.00182159
-0.712516	0.00274793		-0.717231	0.00239333		-0.710649	0.00182234		-0.71584	0.00144626		-0.718238	0.00165789		-0.716597	0.00211771		-0.716681	0.00123393		-0.715309	0.00147032		-0.712912	0.00232699		-0.712961	0.00155651		-0.709339	0.00193416		-0.718783	0.00156931		-0.710606	0.00205238		-0.712836	0.00225097		-0.716974	0.00107589		-0.71133	0.001552
-0.706891	0.00209904		-0.709419	0.00234649		-0.706587	0.00181586		-0.712086	0.00181062		-0.713863	0.00144861		-0.712222	0.00219445		-0.712929	0.00120389		-0.710621	0.00181851		-0.705412	0.00282706		-0.708895	0.00117014		-0.704026	0.00209047		-0.714412	0.0016598		-0.706235	0.00208541		-0.706901	0.00220978		-0.70947	0.00211621		-0.707584	0.00166687
-0.702516	0.00311738		-0.703483	0.00301472		-0.702212	0.00310368		-0.705837	0.00183385		-0.707614	0.00192515		-0.705035	0.00155359		-0.706055	0.00179174		-0.705933	0.00190851		-0.698851	0.00270418		-0.704523	0.00160295		-0.695904	0.00175287		-0.707538	0.00102924		-0.699357	0.00153641		-0.702529	0.000948022		-0.702596	0.00238682		-0.701328	0.00167394
-0.696579	0.00349963		-0.699421	0.00326707		-0.695024	0.0024884		-0.698338	0.00210974		-0.699802	0.00264261		-0.697848	0.00156806		-0.69793	0.00257963		-0.699059	0.00136557		-0.694475	0.00262527		-0.697336	0.00138093		-0.689026	0.00187904		-0.699725	0.00134267		-0.691544	0.0017159		-0.696899	0.00104748		-0.697908	0.00220678		-0.693828	0.0021478
-0.688454	0.00334426		-0.693481	0.00328627		-0.688149	0.00236011		-0.692402	0.00212226		-0.693551	0.00264472		-0.692847	0.0022315		-0.692305	0.00186486		-0.691246	0.00198691		-0.689161	0.00319907		-0.690149	0.00159495		-0.684651	0.00199174		-0.694095	0.00170178		-0.685609	0.00227709		-0.689086	0.00178933		-0.693223	0.00209199		-0.688205	0.00273227
-0.682204	0.00354921		-0.685356	0.00346203		-0.683149	0.00252027		-0.688339	0.00229271		-0.689176	0.00185241		-0.688472	0.0021506		-0.688555	0.00204976		-0.685623	0.00274821		-0.681662	0.00310826		-0.685144	0.00148956		-0.679653	0.00221026		-0.689723	0.00131788		-0.681546	0.00264309		-0.681899	0.00249085		-0.686033	0.00154946		-0.683833	0.0031139
-0.678141	0.0030742		-0.678795	0.00326728		-0.678462	0.00282764		-0.6824	0.00217475		-0.683551	0.00304772		-0.681598	0.00261168		-0.682617	0.00208266		-0.681248	0.00290755		-0.674475	0.00265347		-0.680773	0.0022325		-0.671528	0.00152014		-0.683475	0.000955074		-0.675298	0.00302807		-0.677528	0.00286989		-0.67822	0.00147024		-0.67789	0.0026917
-0.672203	0.00375415		-0.674419	0.00240008		-0.671587	0.00288896		-0.674587	0.00235436		-0.675426	0.0036579		-0.673785	0.00240405		-0.675118	0.0022498		-0.674683	0.00330759		-0.669475	0.00303712		-0.673899	0.00316011		-0.664654	0.00267476		-0.675349	0.00270405		-0.667172	0.00305455		-0.672836	0.00285068		-0.67291	0.00183884		-0.669765	0.00288441
-0.663766	0.00284549		-0.669105	0.00313055		-0.663774	0.0030764		-0.667713	0.00326537		-0.668862	0.00311072		-0.668158	0.00271801		-0.66918	0.00328003		-0.66687	0.00318914		-0.664787	0.00269512		-0.665773	0.00329077		-0.660591	0.00294302		-0.669414	0.00249851		-0.661233	0.00293926		-0.665023	0.00251412		-0.668535	0.00242763		-0.663203	0.00256434
-0.657829	0.00359079		-0.661293	0.0039777		-0.65815	0.00326817		-0.663651	0.00293251		-0.664802	0.00343412		-0.664096	0.00318677		-0.664805	0.00333617		-0.660935	0.00379193		-0.657911	0.00252748		-0.660143	0.00374085		-0.655903	0.0029511		-0.665347	0.00247458		-0.65717	0.00398197		-0.657523	0.0032914		-0.661973	0.00294157		-0.659145	0.00289195
-0.654079	0.0046827		-0.654106	0.0044305		-0.653774	0.00319282		-0.658337	0.00309782		-0.659175	0.0031658		-0.657534	0.00334134		-0.65918	0.00418386		-0.656872	0.00344143		-0.650099	0.00404553		-0.656084	0.00323569		-0.648716	0.00317796		-0.659099	0.0033209		-0.650922	0.0041713		-0.652839	0.00365528		-0.654161	0.0027504		-0.653827	0.00316815
-0.648766	0.00444759		-0.64973	0.00499323		-0.647525	0.00492873		-0.650524	0.00440558		-0.651052	0.00285294		-0.649722	0.00295546		-0.651367	0.00438338		-0.650623	0.00362016		-0.644787	0.00533773		-0.649836	0.00299424		-0.641838	0.00405574		-0.650973	0.00393645		-0.642484	0.00464391		-0.648147	0.00361175		-0.648221	0.00304043		-0.645709	0.00348704
-0.641266	0.00544353		-0.644733	0.00497129		-0.639399	0.00527526		-0.643025	0.0036094		-0.644488	0.0044452		-0.643474	0.00424858		-0.644491	0.00458864		-0.642185	0.00414708		-0.640724	0.00508601		-0.64171	0.00345167		-0.636841	0.00405011		-0.644725	0.00321149		-0.636544	0.00529437		-0.640647	0.00369285		-0.644159	0.00372241		-0.638515	0.00468925
-0.634704	0.00533044		-0.636921	0.00547831		-0.633462	0.00622708		-0.638962	0.00420877		-0.640426	0.00499844		-0.639411	0.004472		-0.640118	0.00547994		-0.636559	0.00534003		-0.633537	0.00497348		-0.635767	0.00424277		-0.632153	0.00475714		-0.641284	0.00379289		-0.632794	0.00584385		-0.632835	0.00402408		-0.63791	0.00359496		-0.634143	0.00454773
-0.630328	0.00604855		-0.629421	0.0063685		-0.629399	0.00639806		-0.633961	0.00496161		-0.635738	0.00424673		-0.633159	0.00461495		-0.635117	0.00533396		-0.633122	0.00533054		-0.625412	0.00544664		-0.631708	0.00425983		-0.625279	0.00582699		-0.635974	0.00450022		-0.627797	0.00589329		-0.628463	0.00533748		-0.629472	0.00454035		-0.629146	0.00445858
-0.625328	0.0074473		-0.625358	0.00632293		-0.62315	0.00685614		-0.626148	0.00620704		-0.628238	0.00487773		-0.625033	0.00461231		-0.627304	0.00544782		-0.627495	0.00505675		-0.620413	0.00633294		-0.62546	0.00472547		-0.617466	0.00617683		-0.628474	0.00476189		-0.620297	0.0068568		-0.624404	0.00586143		-0.623845	0.00515773		-0.621333	0.00631201
-0.617829	0.00629005		-0.620983	0.00731208		-0.615025	0.00780391		-0.618649	0.00642462		-0.621364	0.00517609		-0.619098	0.00591574		-0.620117	0.00643862		-0.619682	0.00576915		-0.616663	0.00692821		-0.617334	0.00618868		-0.61184	0.00602616		-0.621913	0.0050925		-0.613732	0.00688234		-0.617522	0.00609193		-0.620408	0.00649398		-0.614146	0.00725666
-0.610329	0.00809664		-0.613796	0.00659321		-0.609087	0.00785388		-0.614586	0.00630131		-0.616675	0.00656724		-0.615348	0.00671468		-0.615429	0.00769918		-0.613434	0.00635382		-0.610413	0.00641728		-0.611399	0.00737394		-0.607777	0.00749804		-0.617221	0.00593599		-0.609044	0.00756138		-0.610336	0.0075829		-0.614786	0.00659698		-0.61008	0.00731798
-0.605329	0.00886936		-0.606605	0.00682278		-0.60565	0.00784172		-0.610523	0.00812935		-0.611989	0.00779577		-0.610034	0.00682145		-0.610743	0.00880228		-0.609058	0.00627752		-0.6026	0.00688992		-0.607645	0.00749899		-0.601216	0.00876511		-0.612224	0.00647497		-0.604047	0.00764714		-0.605025	0.00940317		-0.606973	0.00654439		-0.605708	0.00703423
-0.600953	0.00910721		-0.601608	0.00802103		-0.600024	0.0093413		-0.603337	0.00889962		-0.6048	0.00862761		-0.602534	0.00700475		-0.60293	0.00818962		-0.603748	0.00729027		-0.596975	0.0081146		-0.602335	0.00761971		-0.59309	0.0102882		-0.604724	0.00710292		-0.596234	0.00947106		-0.600654	0.00862376		-0.600721	0.00847096		-0.598521	0.0075246
-0.593454	0.00909647		-0.597233	0.00884455		-0.592524	0.00993497		-0.595837	0.0102516		-0.596988	0.00926942		-0.595973	0.00905493		-0.595431	0.0101394		-0.596245	0.00838837		-0.5926	0.0106149		-0.594835	0.00773828		-0.587151	0.0108894		-0.597224	0.00847256		-0.589047	0.00966484		-0.594085	0.00887346		-0.596345	0.00916974		-0.591327	0.00816309
-0.585641	0.0100081		-0.590358	0.0101369		-0.585962	0.0115264		-0.59084	0.0091907		-0.591676	0.00925334		-0.591597	0.0103388		-0.591055	0.0114918		-0.589058	0.0095771		-0.586662	0.011123		-0.588274	0.00849959		-0.583088	0.0115751		-0.592532	0.00982154		-0.584359	0.0107858		-0.586272	0.0093097		-0.590722	0.00936855		-0.58633	0.00960329
-0.580641	0.0119454		-0.582233	0.0119044		-0.581587	0.0127985		-0.586464	0.0110145		-0.587613	0.0108314		-0.586284	0.0107455		-0.586993	0.0105146		-0.58437	0.0105759		-0.57885	0.0108195		-0.583582	0.0101313		-0.57684	0.0132216		-0.587848	0.0107061		-0.579671	0.0115026		-0.580024	0.0111897		-0.58291	0.00991915		-0.581958	0.0105496
-0.576578	0.0131694		-0.576606	0.0126072		-0.576275	0.0131832		-0.579586	0.0134631		-0.580739	0.012401		-0.578784	0.0122338		-0.580117	0.012145		-0.579372	0.0119227		-0.572287	0.0140217		-0.578585	0.0109487		-0.568402	0.0132846		-0.580974	0.0111375		-0.572171	0.0135873		-0.575965	0.0125004		-0.575723	0.0124867		-0.575084	0.0112593
-0.569392	0.0142677		-0.572544	0.0135244		-0.568775	0.0141301		-0.571774	0.0144514		-0.572927	0.0141166		-0.571284	0.0129371		-0.572617	0.0144721		-0.572186	0.0129022		-0.568224	0.0153833		-0.570772	0.0123616		-0.562779	0.0162298		-0.573161	0.0115246		-0.564359	0.0145963		-0.570335	0.0125657		-0.571348	0.0139903		-0.566959	0.0139744
-0.561266	0.0163041		-0.566295	0.0148622		-0.561275	0.0150566		-0.566151	0.0162511		-0.5673	0.0159619		-0.566596	0.0140283		-0.567618	0.0161249		-0.564373	0.0137556		-0.562912	0.0159089		-0.563272	0.0150273		-0.559338	0.01688		-0.567851	0.0144512		-0.559358	0.0175135		-0.562209	0.0136622		-0.566347	0.0146005		-0.561328	0.0166668
-0.556266	0.0183993		-0.55817	0.0165706		-0.556587	0.0177378		-0.561775	0.0181875		-0.563239	0.0167123		-0.56222	0.0159739		-0.563242	0.0168339		-0.559685	0.0166754		-0.554787	0.0179539		-0.55858	0.0168294		-0.553715	0.0193789		-0.563785	0.0159296		-0.554982	0.0193662		-0.555648	0.0163138		-0.558847	0.0164858		-0.557269	0.0193118
-0.552516	0.0202952		-0.552231	0.0203211		-0.552212	0.0214125		-0.555527	0.0194827		-0.556363	0.0169455		-0.554721	0.0183317		-0.556679	0.0177586		-0.555309	0.0182772		-0.547913	0.0195698		-0.554209	0.017554		-0.545903	0.0212146		-0.556598	0.0162336		-0.547795	0.0202735		-0.551589	0.0184241		-0.551347	0.0184634		-0.551021	0.0187587
-0.545954	0.0214159		-0.548168	0.0221114		-0.545025	0.023277		-0.547714	0.0225797		-0.548238	0.0190051		-0.546908	0.0214981		-0.548556	0.0212196		-0.54781	0.0196893		-0.543537	0.0233395		-0.547022	0.0193699		-0.539654	0.0251118		-0.548472	0.0187432		-0.539983	0.0214008		-0.545966	0.0207069		-0.546659	0.0214609		-0.542896	0.0216242
-0.538453	0.0245947		-0.541919	0.0237746		-0.537212	0.0253373		-0.541462	0.0263171		-0.542926	0.0245484		-0.541911	0.0243442		-0.542929	0.025221		-0.539997	0.0232893		-0.538225	0.0269792		-0.539209	0.0230987		-0.535279	0.0281317		-0.543475	0.0233409		-0.535294	0.0259756		-0.537528	0.0219394		-0.541971	0.0227437		-0.536952	0.0251622
-0.532829	0.027803		-0.533481	0.0275317		-0.5319	0.0318428		-0.537399	0.0327325		-0.539489	0.0255913		-0.537536	0.0249938		-0.538868	0.0267152		-0.535309	0.0272591		-0.530413	0.029697		-0.534204	0.025799		-0.529965	0.0308388		-0.540034	0.0256826		-0.531545	0.0297589		-0.530959	0.0264191		-0.534471	0.026954		-0.532893	0.0293448
-0.528454	0.0319664		-0.527546	0.0329853		-0.527525	0.0359683		-0.531151	0.0322951		-0.533239	0.0256983		-0.530349	0.0266849		-0.532618	0.0279562		-0.531559	0.02934		-0.523224	0.0337436		-0.529833	0.0290822		-0.522465	0.0337865		-0.533473	0.0267732		-0.524983	0.0309087		-0.527213	0.0301892		-0.526658	0.0326872		-0.526645	0.0322087
-0.522517	0.0357317		-0.524109	0.0368684		-0.520338	0.0384194		-0.523026	0.0339532		-0.525739	0.030362		-0.522223	0.0347168		-0.524493	0.0342374		-0.524998	0.0325051		-0.519163	0.0369271		-0.522646	0.0331077		-0.515278	0.0393452		-0.525973	0.0310826		-0.517171	0.0360653		-0.522216	0.0341143		-0.522283	0.0380647		-0.51852	0.0361682
-0.514704	0.0399099		-0.518482	0.0389902		-0.512525	0.0432525		-0.517086	0.0397871		-0.519801	0.0350993		-0.517535	0.0397722		-0.518242	0.0403569		-0.517498	0.0380431		-0.514788	0.0410161		-0.514833	0.0376327		-0.51059	0.045206		-0.52035	0.0352644		-0.511857	0.0436531		-0.514716	0.0362573		-0.51822	0.0400675		-0.512271	0.0423219
-0.508141	0.0452756		-0.510982	0.0439225		-0.507837	0.0533282		-0.513336	0.0466845		-0.515426	0.0402459		-0.513785	0.0430993		-0.514179	0.0445684		-0.512184	0.0446686		-0.507599	0.0461909		-0.509836	0.043599		-0.505902	0.0495925		-0.515971	0.0384966		-0.507481	0.0481789		-0.508147	0.0414082		-0.511659	0.0432962		-0.50883	0.04824
-0.504079	0.0532683		-0.504421	0.0512628		-0.504087	0.0544726		-0.508026	0.0488186		-0.509801	0.0436689		-0.507224	0.0465623		-0.508242	0.0502275		-0.507809	0.0502678		-0.500412	0.0533465		-0.506395	0.0482436		-0.498402	0.0558499		-0.510036	0.0417686		-0.501233	0.0559435		-0.503463	0.0494794		-0.503847	0.0506535		-0.50352	0.0523951
-0.498766	0.0593104		-0.500045	0.0591847		-0.497524	0.0572154		-0.500214	0.0555991		-0.501989	0.0487343		-0.49972	0.0523925		-0.500117	0.0585182		-0.501247	0.0540705		-0.495413	0.0612668		-0.499834	0.0531583		-0.490589	0.060841		-0.50191	0.0485785		-0.49342	0.0610609		-0.498779	0.0550128		-0.498533	0.0583509		-0.495708	0.0559444
-0.490641	0.0625301		-0.495044	0.0614267		-0.490025	0.0666345		-0.493649	0.0628826		-0.494802	0.0582739		-0.49441	0.0608079		-0.493868	0.0628815		-0.493435	0.060241		-0.491037	0.0649592		-0.492022	0.0591731		-0.485901	0.0674924		-0.495349	0.0580742		-0.486859	0.0688789		-0.491279	0.0604135		-0.494161	0.0623262		-0.489459	0.0652823
-0.483766	0.0702569		-0.487545	0.067395		-0.4844	0.0750408		-0.489277	0.07483		-0.490426	0.0645483		-0.490035	0.0672959		-0.490118	0.0699972		-0.487183	0.0702299		-0.484161	0.0713861		-0.486711	0.0683284		-0.481213	0.0770909		-0.491282	0.0654575		-0.482484	0.0742567		-0.483779	0.0675192		-0.487596	0.0684913		-0.48508	0.0742601
-0.479391	0.0814622		-0.480045	0.0779085		-0.480024	0.0821397		-0.484276	0.0798931		-0.485425	0.068669		-0.483786	0.0745708		-0.485117	0.0762828		-0.482807	0.0769658		-0.476038	0.0827054		-0.482332	0.0728247		-0.474026	0.0828721		-0.485972	0.0700617		-0.47717	0.0777419		-0.478774	0.0771456		-0.479783	0.0775786		-0.47977	0.0830631
-0.474078	0.0885081		-0.475357	0.0879277		-0.474087	0.0911337		-0.476776	0.0856982		-0.477925	0.0755128		-0.475974	0.0788917		-0.477618	0.0834239		-0.477184	0.0836006		-0.470724	0.0926136		-0.476084	0.0817234		-0.466214	0.0933389		-0.47816	0.073924		-0.469357	0.0881064		-0.474403	0.0842171		-0.473535	0.0863694		-0.47227	0.0847806
-0.466266	0.095261		-0.470669	0.0930053		-0.465961	0.0994159		-0.469277	0.0950071		-0.470426	0.0849677		-0.469409	0.0920965		-0.470742	0.0942637		-0.469372	0.0915569		-0.466661	0.0985284		-0.467958	0.0914595		-0.461529	0.106233		-0.470973	0.0837881		-0.46217	0.101327		-0.467529	0.0913296		-0.469472	0.0949434		-0.464771	0.0976495
-0.459079	0.106913		-0.463482	0.101426		-0.459713	0.111119		-0.464588	0.104024		-0.465737	0.0978157		-0.465033	0.100773		-0.466055	0.0980454		-0.462498	0.101092		-0.4601	0.101761		-0.46171	0.0985712		-0.457466	0.112585		-0.466594	0.0966798		-0.457795	0.113246		-0.459403	0.101678		-0.463846	0.102077		-0.460078	0.112329
-0.455016	0.118534		-0.455669	0.113012		-0.455337	0.121709		-0.4599	0.117077		-0.461051	0.104976		-0.459723	0.108787		-0.461054	0.108764		-0.458435	0.113475		-0.451975	0.111738		-0.457331	0.10639		-0.450901	0.120616		-0.461596	0.105043		-0.452794	0.115847		-0.454086	0.11629		-0.45572	0.108793		-0.455394	0.117637
-0.450641	0.12304		-0.450668	0.127671		-0.450025	0.127766		-0.452713	0.120354		-0.453551	0.110103		-0.451911	0.117299		-0.453867	0.121362		-0.452808	0.120611		-0.446037	0.130056		-0.452021	0.116939		-0.443402	0.131956		-0.453471	0.110571		-0.444672	0.123149		-0.449714	0.123844		-0.449159	0.122385		-0.448207	0.123982
-0.443454	0.133249		-0.446296	0.13691		-0.4419	0.138333		-0.444901	0.132124		-0.445739	0.12013		-0.445033	0.13376		-0.446368	0.132821		-0.444683	0.126962		-0.441975	0.140774		-0.444208	0.126358		-0.438092	0.141201		-0.446284	0.123609		-0.437795	0.134565		-0.443153	0.128709		-0.445096	0.131022		-0.440395	0.135058
-0.436579	0.146215		-0.439106	0.145114		-0.435024	0.15215		-0.4399	0.144313		-0.441676	0.1332		-0.440661	0.143634		-0.441366	0.145275		-0.438122	0.142942		-0.436037	0.145111		-0.437334	0.141151		-0.433716	0.154293		-0.442225	0.136812		-0.433732	0.151876		-0.435027	0.144583		-0.439474	0.141868		-0.43539	0.150374
-0.431579	0.158355		-0.43098	0.158185		-0.430649	0.16304		-0.435524	0.15823		-0.437614	0.145833		-0.435347	0.148905		-0.43668	0.156427		-0.434372	0.157464		-0.427599	0.157431		-0.432955	0.151144		-0.427464	0.16461		-0.437846	0.140841		-0.429047	0.162921		-0.429397	0.159532		-0.431348	0.154316		-0.431018	0.15882
-0.426892	0.168048		-0.426296	0.172681		-0.42565	0.17186		-0.428337	0.167998		-0.430738	0.153665		-0.427222	0.160188		-0.429804	0.162947		-0.429684	0.162981		-0.421661	0.174557		-0.427645	0.161214		-0.419339	0.180222		-0.430659	0.149741		-0.421857	0.169091		-0.425964	0.167192		-0.424783	0.169148		-0.423831	0.16661
-0.420017	0.173214		-0.422859	0.188113		-0.417524	0.186899		-0.420525	0.187468		-0.423238	0.166216		-0.420348	0.179273		-0.421992	0.17656		-0.422184	0.175778		-0.418224	0.183868		-0.419832	0.173042		-0.41309	0.195012		-0.423472	0.164526		-0.414983	0.182655		-0.420028	0.179104		-0.421033	0.180927		-0.415706	0.181377
-0.412204	0.192784		-0.416294	0.191976		-0.41065	0.202257		-0.415524	0.199803		-0.418239	0.179982		-0.416285	0.194446		-0.41668	0.191714		-0.41531	0.189438		-0.412599	0.193454		-0.412645	0.191587		-0.409027	0.205278		-0.418475	0.177953		-0.409982	0.199174		-0.412215	0.188304		-0.416036	0.183897		-0.411021	0.195718
-0.406578	0.215356		-0.408481	0.20323		-0.4069	0.216544		-0.411774	0.202149		-0.41355	0.189311		-0.41191	0.201718		-0.412617	0.205163		-0.410622	0.201544		-0.404787	0.204225		-0.408899	0.200579		-0.403401	0.214555		-0.414096	0.188354		-0.405297	0.208122		-0.406272	0.199037		-0.408533	0.195141		-0.407268	0.206228
-0.402517	0.221748		-0.402858	0.215702		-0.402212	0.214778		-0.405213	0.210057		-0.406989	0.198441		-0.404723	0.211123		-0.40543	0.215952		-0.405933	0.207294		-0.398537	0.223017		-0.404207	0.207181		-0.395588	0.224496		-0.407222	0.201384		-0.398419	0.216575		-0.402213	0.212079		-0.401658	0.214813		-0.400707	0.214086
-0.396266	0.228409		-0.398483	0.229592		-0.395025	0.22808		-0.3974	0.228236		-0.399177	0.208644		-0.397849	0.226347		-0.397305	0.223627		-0.398747	0.217535		-0.394163	0.239833		-0.39702	0.217088		-0.388714	0.240788		-0.399409	0.213189		-0.390607	0.23134		-0.396278	0.228593		-0.39697	0.229972		-0.393207	0.228416
-0.388141	0.238788		-0.392544	0.24303		-0.388149	0.245599		-0.392086	0.247258		-0.393239	0.224424		-0.392848	0.242348		-0.392306	0.246801		-0.390934	0.238278		-0.388849	0.249587		-0.389833	0.232368		-0.384652	0.251504		-0.393786	0.227515		-0.384984	0.255493		-0.388465	0.240556		-0.392286	0.23756		-0.387897	0.245246
-0.382203	0.257915		-0.384418	0.258825		-0.38315	0.265889		-0.387715	0.257002		-0.389176	0.244601		-0.38816	0.249592		-0.388556	0.264428		-0.385933	0.254051		-0.381349	0.25209		-0.385149	0.249684		-0.379029	0.260062		-0.38972	0.243436		-0.380921	0.262305		-0.381591	0.254147		-0.384786	0.249841		-0.383518	0.256694
-0.377829	0.266541		-0.37817	0.271155		-0.378462	0.269659		-0.381462	0.270546		-0.383239	0.254692		-0.381286	0.255088		-0.382305	0.268635		-0.381558	0.262295		-0.37385	0.269669		-0.380457	0.263815		-0.370903	0.2771		-0.383471	0.250797		-0.37436	0.272099		-0.377212	0.268241		-0.376974	0.260874		-0.377269	0.267891
-0.371579	0.280129		-0.373794	0.279397		-0.371588	0.279792		-0.37365	0.286873		-0.375114	0.262032		-0.373473	0.272686		-0.374806	0.278599		-0.374683	0.27509		-0.369162	0.28866		-0.373583	0.276048		-0.364025	0.296341		-0.375346	0.263214		-0.366235	0.285702		-0.372215	0.277363		-0.371972	0.282178		-0.369457	0.282701
-0.363454	0.300903		-0.36848	0.286796		-0.363775	0.296762		-0.367089	0.302225		-0.368863	0.281202		-0.367846	0.295484		-0.369179	0.294074		-0.366558	0.290706		-0.364788	0.295002		-0.36577	0.284453		-0.360276	0.308715		-0.369411	0.288008		-0.360295	0.301432		-0.364402	0.293908		-0.367597	0.293434		-0.363208	0.298325
-0.357517	0.321131		-0.360359	0.300856		-0.35815	0.316524		-0.363026	0.309367		-0.364488	0.299127		-0.363784	0.303529		-0.364805	0.30875		-0.361248	0.30414		-0.357286	0.31061		-0.360147	0.293495		-0.355591	0.316957		-0.365344	0.301373		-0.356232	0.312616		-0.357215	0.3094		-0.361036	0.306817		-0.358829	0.309268
-0.354079	0.326808		-0.353481	0.318863		-0.354088	0.328824		-0.357712	0.325813		-0.358863	0.309088		-0.357222	0.311526		-0.358868	0.321894		-0.357185	0.314619		-0.349787	0.329634		-0.356081	0.317219		-0.348091	0.329895		-0.359096	0.306741		-0.349984	0.323069		-0.352836	0.323682		-0.35291	0.323953		-0.353206	0.325054
-0.348454	0.333067		-0.349106	0.34257		-0.347525	0.333895		-0.349587	0.336625		-0.35105	0.324267		-0.34941	0.329036		-0.351055	0.33927		-0.350308	0.330265		-0.344788	0.339955		-0.34952	0.327432		-0.341214	0.342251		-0.35097	0.319922		-0.341546	0.339935		-0.347839	0.331095		-0.347597	0.343284		-0.345393	0.338313
-0.340954	0.342962		-0.343796	0.355778		-0.339399	0.352804		-0.342713	0.347906		-0.344489	0.345855		-0.34347	0.340149		-0.344492	0.354112		-0.342182	0.349084		-0.340412	0.351842		-0.341394	0.339075		-0.336529	0.361965		-0.345035	0.342271		-0.335919	0.36357		-0.340339	0.340305		-0.343534	0.35336		-0.338519	0.353481
-0.334391	0.3612		-0.33567	0.369424		-0.333462	0.373824		-0.338337	0.370827		-0.340737	0.352798		-0.339099	0.359906		-0.340117	0.35987		-0.336872	0.368468		-0.332912	0.365931		-0.335459	0.358662		-0.331841	0.375365		-0.341594	0.357802		-0.332482	0.37629		-0.332839	0.359362		-0.33666	0.362672		-0.33414	0.377003
-0.330016	0.37928		-0.328796	0.383684		-0.329399	0.390761		-0.333336	0.378333		-0.335738	0.366428		-0.332847	0.366925		-0.334805	0.367064		-0.333122	0.379305		-0.3251	0.377693		-0.331705	0.380854		-0.324654	0.383962		-0.335971	0.359858		-0.326859	0.377938		-0.32846	0.378053		-0.328534	0.382885		-0.32883	0.388374
-0.324704	0.385473		-0.324733	0.399516		-0.323149	0.396057		-0.325215	0.393293		-0.328239	0.378112		-0.324721	0.380991		-0.326992	0.381466		-0.327496	0.383972		-0.320412	0.398395		-0.325457	0.391151		-0.31715	0.400675		-0.328471	0.37381		-0.319047	0.39305		-0.324401	0.391163		-0.322908	0.398793		-0.321018	0.396376
-0.317204	0.398624		-0.320358	0.406365		-0.315025	0.41148		-0.318337	0.407784		-0.321675	0.391652		-0.318786	0.405277		-0.319805	0.406806		-0.319683	0.400684		-0.316662	0.417097		-0.317331	0.40275		-0.31184	0.420935		-0.32191	0.390876		-0.312795	0.41648		-0.317214	0.399671		-0.319471	0.415157		-0.313831	0.415543
-0.309704	0.425915		-0.312858	0.421801		-0.3094	0.429302		-0.314274	0.416784		-0.316989	0.404331		-0.315349	0.423576		-0.31543	0.421527		-0.313747	0.414236		-0.3101	0.425971		-0.311396	0.417242		-0.307465	0.436123		-0.317538	0.405097		-0.308419	0.428262		-0.310027	0.420548		-0.313535	0.415056		-0.309772	0.428181
-0.305016	0.442827		-0.305671	0.441906		-0.305649	0.441558		-0.309899	0.432846		-0.311988	0.415441		-0.309722	0.432341		-0.310742	0.425894		-0.309372	0.431372		-0.302599	0.434955		-0.307955	0.431414		-0.300904	0.446263		-0.312221	0.415378		-0.303109	0.437456		-0.305022	0.438185		-0.305723	0.426518		-0.305393	0.441796
-0.300641	0.454949		-0.300983	0.458143		-0.300024	0.452396		-0.302399	0.443596		-0.304801	0.425878		-0.301909	0.444453		-0.302929	0.439948		-0.303745	0.443031		-0.297287	0.458814		-0.302332	0.444362		-0.292778	0.470268		-0.304721	0.429242		-0.295609	0.452427		-0.300651	0.454177		-0.299783	0.453401		-0.298206	0.452248
-0.293142	0.465801		-0.296295	0.469513		-0.292211	0.464975		-0.295525	0.4572		-0.297301	0.445295		-0.295661	0.462984		-0.295429	0.463466		-0.295933	0.460523		-0.292911	0.474757		-0.294519	0.457485		-0.286839	0.491828		-0.297221	0.449569		-0.28811	0.482042		-0.29409	0.464199		-0.295408	0.463855		-0.291019	0.466024
-0.285329	0.481571		-0.289108	0.47831		-0.286274	0.478533		-0.290524	0.476403		-0.291988	0.469077		-0.291285	0.482751		-0.291367	0.480541		-0.288746	0.479589		-0.286663	0.48081		-0.288271	0.471301		-0.282776	0.502828		-0.292537	0.471942		-0.283421	0.496137		-0.285964	0.481826		-0.289785	0.477221		-0.286021	0.482804
-0.280329	0.507495		-0.280983	0.504367		-0.2819	0.498826		-0.285839	0.49714		-0.287925	0.483339		-0.285972	0.492483		-0.287304	0.490971		-0.28437	0.505019		-0.278538	0.508012		-0.283899	0.486657		-0.276528	0.512332		-0.288157	0.484344		-0.278733	0.504163		-0.280341	0.499811		-0.281972	0.494863		-0.281329	0.500551
-0.275954	0.51978		-0.275669	0.529265		-0.276274	0.510765		-0.278961	0.511224		-0.281051	0.49601		-0.278159	0.495735		-0.280117	0.506013		-0.279373	0.505314		-0.272287	0.524517		-0.278582	0.506524		-0.26809	0.528574		-0.280658	0.497069		-0.271233	0.516789		-0.276275	0.51192		-0.275098	0.517835		-0.274455	0.516471
-0.268767	0.527089		-0.271606	0.535853		-0.268774	0.531441		-0.271149	0.524421		-0.272925	0.517056		-0.271285	0.520102		-0.27293	0.522212		-0.27187	0.524635		-0.268225	0.532118		-0.271082	0.51884		-0.262463	0.549269		-0.273158	0.522604		-0.263734	0.530563		-0.270026	0.53277		-0.270723	0.528084		-0.266956	0.533534
-0.260641	0.551382		-0.265045	0.543072		-0.261587	0.550878		-0.265526	0.546003		-0.267614	0.542328		-0.266597	0.548858		-0.267929	0.538766		-0.26437	0.54315		-0.2626	0.552198		-0.263895	0.530035		-0.259026	0.555285		-0.268161	0.537465		-0.259045	0.5526		-0.261901	0.549969		-0.265722	0.538014		-0.261333	0.548904
-0.255954	0.563133		-0.25692	0.56281		-0.256899	0.575752		-0.261463	0.555948		-0.263238	0.54941		-0.261596	0.559605		-0.263556	0.555167		-0.259686	0.558048		-0.254787	0.573041		-0.259211	0.556824		-0.25309	0.566969		-0.263782	0.543111		-0.254357	0.562019		-0.255653	0.561788		-0.257909	0.555184		-0.257266	0.555229
-0.252204	0.578647		-0.250984	0.586033		-0.252212	0.579461		-0.254902	0.565481		-0.256364	0.547372		-0.254096	0.568247		-0.25668	0.570175		-0.254997	0.582567		-0.247911	0.577519		-0.254206	0.5737		-0.245591	0.592314		-0.256595	0.560076		-0.246858	0.56863		-0.251586	0.57581		-0.250409	0.581954		-0.250705	0.568608
-0.245641	0.585585		-0.246921	0.599861		-0.244713	0.590334		-0.246777	0.585374		-0.248551	0.570403		-0.246596	0.589533		-0.248554	0.587619		-0.247498	0.586566		-0.243849	0.603779		-0.247019	0.584692		-0.239651	0.614415		-0.248469	0.569212		-0.239045	0.598286		-0.245651	0.592112		-0.245721	0.599743		-0.24258	0.591336
-0.238141	0.605487		-0.240669	0.600732		-0.237211	0.60819		-0.24115	0.606551		-0.243238	0.590092		-0.241599	0.607484		-0.24293	0.601313		-0.239998	0.606311		-0.238224	0.61902		-0.239519	0.5977		-0.235276	0.629725		-0.243785	0.592862		-0.23467	0.626943		-0.237525	0.604671		-0.241033	0.610207		-0.236644	0.61484
-0.232828	0.62346		-0.232544	0.62297		-0.232212	0.635147		-0.236775	0.629805		-0.239488	0.606467		-0.237223	0.620772		-0.238867	0.617417		-0.235622	0.620905		-0.230101	0.636961		-0.234522	0.621982		-0.229653	0.643128		-0.240031	0.612564		-0.230607	0.631589		-0.230964	0.627402		-0.233533	0.627106		-0.232578	0.63097
-0.228454	0.633523		-0.226921	0.643095		-0.227837	0.64227		-0.230526	0.636866		-0.233237	0.618953		-0.230033	0.632238		-0.232617	0.630124		-0.23156	0.630403		-0.223225	0.659875		-0.230143	0.636089		-0.22184	0.656654		-0.23347	0.629104		-0.224046	0.638895		-0.227523	0.650169		-0.226034	0.641689		-0.226329	0.640888
-0.222204	0.653494		-0.223171	0.670927		-0.220337	0.656453		-0.222401	0.659411		-0.225738	0.641446		-0.221911	0.652242		-0.224493	0.657392		-0.224686	0.644959		-0.219475	0.676461		-0.222643	0.64267		-0.214966	0.674232		-0.22597	0.642162		-0.216546	0.654233		-0.222526	0.654267		-0.221658	0.663556		-0.217891	0.65562
-0.214079	0.6655		-0.217544	0.677259		-0.212524	0.67503		-0.216461	0.681333		-0.220113	0.662904		-0.217223	0.678184		-0.218556	0.680044		-0.217182	0.665771		-0.214786	0.691484		-0.21483	0.656024		-0.210278	0.697404		-0.220347	0.650126		-0.211232	0.67922		-0.214713	0.671916		-0.217595	0.668948		-0.212268	0.678966
-0.207829	0.706917		-0.210045	0.685275		-0.207838	0.696267		-0.212712	0.69506		-0.215427	0.669807		-0.213473	0.688462		-0.214493	0.688993		-0.212185	0.684482		-0.207287	0.694906		-0.210146	0.687602		-0.20559	0.698454		-0.215976	0.667338		-0.206857	0.70109		-0.208152	0.696884		-0.210721	0.673185		-0.208827	0.70054
-0.203766	0.711203		-0.203483	0.702984		-0.204086	0.718999		-0.207089	0.704508		-0.2098	0.689455		-0.206908	0.694376		-0.208243	0.702631		-0.207497	0.690628		-0.200413	0.709098		-0.206392	0.693217		-0.197777	0.707734		-0.20972	0.687375		-0.200608	0.7018		-0.20346	0.715797		-0.203222	0.696335		-0.203204	0.703895
-0.198141	0.71335		-0.199108	0.724458		-0.197525	0.716891		-0.199589	0.711019		-0.201987	0.693318		-0.199408	0.709941		-0.200117	0.714285		-0.200935	0.706259		-0.195412	0.729102		-0.199831	0.704862		-0.190277	0.727978		-0.201907	0.701465		-0.192483	0.728176		-0.198463	0.719761		-0.197908	0.718194		-0.195392	0.721023
-0.190016	0.735614		-0.193794	0.743368		-0.190025	0.728833		-0.193024	0.724562		-0.195113	0.717151		-0.194098	0.736094		-0.19418	0.730992		-0.193123	0.718678		-0.190725	0.736489		-0.192331	0.733859		-0.185589	0.751226		-0.195659	0.729989		-0.186234	0.754284		-0.191276	0.730987		-0.193536	0.735284		-0.189143	0.738339
-0.183141	0.75854		-0.186294	0.75287		-0.184711	0.754188		-0.188648	0.74831		-0.190738	0.734344		-0.189723	0.752853		-0.19043	0.756778		-0.187183	0.751758		-0.183849	0.751229		-0.187021	0.745499		-0.180901	0.766294		-0.191287	0.742618		-0.182172	0.771581		-0.183776	0.750606		-0.186971	0.754331		-0.184772	0.755582
-0.179078	0.772006		-0.179107	0.763362		-0.180338	0.7679		-0.183338	0.769915		-0.185739	0.747398		-0.183471	0.767456		-0.185118	0.766418		-0.183121	0.765202		-0.17635	0.77105		-0.182642	0.757611		-0.173401	0.77757		-0.185657	0.749651		-0.176545	0.776879		-0.178779	0.765737		-0.179159	0.760883		-0.179141	0.7622
-0.173766	0.777291		-0.174419	0.783027		-0.173775	0.780886		-0.175839	0.777165		-0.177926	0.763346		-0.175345	0.782239		-0.177618	0.772554		-0.177185	0.763701		-0.170725	0.784555		-0.176081	0.772815		-0.165589	0.79234		-0.177844	0.756261		-0.16842	0.788988		-0.174087	0.78662		-0.173223	0.786891		-0.171642	0.771226
-0.165641	0.790258		-0.169418	0.797017		-0.165962	0.807412		-0.168339	0.794792		-0.170737	0.777274		-0.169097	0.793259		-0.171055	0.788478		-0.16906	0.780186		-0.166349	0.801063		-0.168268	0.788486		-0.161213	0.813972		-0.17097	0.790766		-0.161858	0.80275		-0.167213	0.796395		-0.16916	0.793985		-0.164767	0.804894
-0.158454	0.821451		-0.161918	0.804509		-0.159712	0.817231		-0.163651	0.803837		-0.166051	0.792937		-0.165034	0.807829		-0.166367	0.806384		-0.162808	0.807869		-0.159788	0.819225		-0.16202	0.798539		-0.157463	0.828978		-0.166598	0.809756		-0.157483	0.816522		-0.1594	0.813995		-0.162908	0.808049		-0.160083	0.824971
-0.154703	0.83472		-0.154419	0.811189		-0.155649	0.828232		-0.158962	0.812372		-0.161363	0.802378		-0.159411	0.829068		-0.161368	0.821034		-0.158436	0.818309		-0.151976	0.827486		-0.157648	0.817373		-0.150589	0.830067		-0.161288	0.821585		-0.15186	0.83101		-0.15409	0.831088		-0.154783	0.827818		-0.155078	0.82309
-0.150329	0.834977		-0.14973	0.842675		-0.149712	0.842416		-0.151776	0.830353		-0.15355	0.820202		-0.151286	0.838591		-0.153868	0.826207		-0.152809	0.833793		-0.146038	0.839244		-0.152018	0.822925		-0.14309	0.85552		-0.153476	0.826285		-0.144048	0.842575		-0.149711	0.835069		-0.148221	0.832761		-0.147578	0.830127
-0.142829	0.850555		-0.145046	0.865536		-0.141899	0.853899		-0.143963	0.847034		-0.146051	0.82645		-0.144721	0.850954		-0.146368	0.857403		-0.144684	0.841404		-0.141975	0.851903		-0.144205	0.830973		-0.137776	0.867762		-0.146594	0.841778		-0.13717	0.859059		-0.142837	0.853356		-0.144472	0.84739		-0.140079	0.847441
-0.135954	0.869325		-0.137546	0.857252		-0.135025	0.872626		-0.138962	0.858434		-0.141988	0.836454		-0.140345	0.869249		-0.141367	0.867455		-0.138123	0.859302		-0.135725	0.860615		-0.137331	0.853504		-0.133404	0.872289		-0.142535	0.855633		-0.13342	0.873819		-0.134711	0.872586		-0.138536	0.860496		-0.135082	0.865963
-0.131266	0.873258		-0.130043	0.872524		-0.130962	0.870437		-0.134587	0.864402		-0.137925	0.848568		-0.135035	0.876022		-0.136992	0.867624		-0.134373	0.877144		-0.127287	0.876846		-0.133272	0.870547		-0.126839	0.885908		-0.137851	0.86674		-0.128732	0.87691		-0.129714	0.893948		-0.130411	0.8822		-0.130702	0.875487
-0.126579	0.884615		-0.125358	0.892176		-0.125338	0.882088		-0.127087	0.871654		-0.130738	0.856837		-0.12691	0.888828		-0.129805	0.88254		-0.129685	0.88182		-0.121662	0.900375		-0.127954	0.881158		-0.119027	0.895349		-0.130656	0.867598		-0.121232	0.892087		-0.125961	0.896136		-0.123845	0.89281		-0.123203	0.882019
-0.119392	0.884652		-0.121608	0.906807		-0.117212	0.889928		-0.119274	0.887197		-0.123551	0.891836		-0.120036	0.907698		-0.121992	0.894442		-0.121872	0.88702		-0.118225	0.90943		-0.119837	0.888904		-0.113091	0.903474		-0.123469	0.882643		-0.114358	0.90027		-0.119712	0.898035		-0.120408	0.899352		-0.11539	0.890204
-0.111579	0.892642		-0.114731	0.908195		-0.110649	0.899254		-0.114586	0.913098		-0.11855	0.910123		-0.116286	0.914965		-0.11668	0.915315		-0.114998	0.898528		-0.112287	0.912999		-0.112955	0.902516		-0.109028	0.921954		-0.118785	0.894419		-0.10967	0.902106		-0.112212	0.923628		-0.115411	0.908894		-0.110706	0.907362
-0.106266	0.912182		-0.107544	0.91904		-0.106899	0.915935		-0.110523	0.919004		-0.114175	0.903955		-0.111598	0.913551		-0.112618	0.918393		-0.110622	0.911106		-0.104788	0.925268		-0.109209	0.915281		-0.103089	0.928552		-0.1141	0.912196		-0.104985	0.903518		-0.106277	0.924943		-0.107599	0.914961		-0.106952	0.92422
-0.101891	0.928262		-0.101921	0.920119		-0.1019	0.921606		-0.103962	0.924865		-0.107301	0.905834		-0.104098	0.921993		-0.105429	0.922217		-0.105621	0.913398		-0.0985374	0.949082		-0.104517	0.927245		-0.0949634	0.930091		-0.106914	0.920117		-0.0977944	0.921542		-0.10221	0.942783		-0.101034	0.933064		-0.100391	0.931444
-0.0953286	0.935267		-0.0975454	0.928867		-0.0947112	0.939023		-0.0964625	0.930285		-0.0994884	0.913775		-0.0972203	0.926759		-0.0973056	0.941551		-0.0984345	0.920185		-0.0941619	0.954588		-0.0970172	0.929698		-0.0884021	0.944213		-0.0991011	0.935752		-0.0899819	0.93439		-0.0962746	0.94541		-0.0963453	0.938784		-0.0925782	0.930272
-0.0872043	0.945283		-0.0912931	0.940073		-0.0878371	0.944614		-0.0911486	0.939341		-0.0935508	0.924992		-0.0925358	0.939107		-0.0923045	0.938207		-0.090622	0.932423		-0.0888499	0.956234		-0.0901431	0.931368		-0.0843395	0.953186		-0.0937834	0.94857		-0.0846718	0.939336		-0.0881493	0.946284		-0.0913481	0.950153		-0.0872681	0.943864
-0.0815785	0.95325		-0.0831678	0.944163		-0.0831489	0.9577		-0.0867769	0.940991		-0.0894881	0.938709		-0.0878476	0.951751		-0.0888674	0.937664		-0.0856209	0.950234		-0.0810374	0.952642		-0.0854587	0.936728		-0.0787166	0.963418		-0.0897246	0.9425		-0.0802964	0.948918		-0.081588	0.957219		-0.0841612	0.949931		-0.0832093	0.953809
-0.0775159	0.953976		-0.0769193	0.961451		-0.0784625	0.969764		-0.0802118	0.949194		-0.0832378	0.935954		-0.0806607	0.957944		-0.0823043	0.954633		-0.0812455	0.958284		-0.0738505	0.95793		-0.0807742	0.944609		-0.0702785	0.970139		-0.0831633	0.951062		-0.0737351	0.954874		-0.0775292	0.962668		-0.0766577	0.957458		-0.0766404	0.952715
-0.0709537	0.970209		-0.0725438	0.962173		-0.0712737	0.973659		-0.0723993	0.968358		-0.0751124	0.946213		-0.0728482	0.967869		-0.0748046	0.96227		-0.0743714	0.951939		-0.0694751	0.970702		-0.0735797	0.958368		-0.0637134	0.975088		-0.075038	0.957162		-0.0659226	0.95954		-0.0722115	0.960267		-0.0716604	0.965548		-0.0688279	0.958623
-0.0628284	0.974181		-0.066921	0.975531		-0.0634612	0.96534		-0.0661509	0.968557		-0.068864	0.961514		-0.0678471	0.971473		-0.0691798	0.97358		-0.0665589	0.95928		-0.064474	0.983244		-0.0657672	0.97339		-0.0602764	0.983336		-0.0694075	0.962472		-0.0599831	0.976787		-0.064399	0.970212		-0.0669721	0.980138		-0.0625794	0.971926
-0.0572036	0.979537		-0.0591085	0.983394		-0.0581493	0.96519		-0.0620882	0.972525		-0.0648013	0.971471		-0.0634717	0.96963		-0.0648043	0.98325		-0.061245	0.977604		-0.0569743	0.990056		-0.0604572	0.975449		-0.0552791	0.974297		-0.0653486	0.973446		-0.0559205	0.9756		-0.0572121	0.98102		-0.060098	0.982044		-0.0585205	0.975911
-0.0534537	0.979054		-0.0522306	0.985932		-0.0537738	0.980161		-0.0561487	0.975235		-0.0588637	0.985047		-0.0565976	0.974426		-0.0588668	0.986398		-0.0568734	0.981576		-0.0494746	0.998009		-0.0560855	0.981595		-0.0474666	0.97908		-0.0587874	0.978969		-0.0493592	0.979332		-0.0528404	0.986416		-0.0522855	0.982765		-0.0528901	0.973757
-0.047829	0.980659		-0.0481679	0.986621		-0.0472125	0.990858		-0.0483362	0.978823		-0.0507384	0.98053		-0.0484723	0.982423		-0.0507414	0.984813		-0.0499955	0.981205		-0.0447864	0.997927		-0.0495242	0.973552		-0.0409015	0.991104		-0.0506621	0.983215		-0.0412339	0.978548		-0.0478356	0.988445		-0.0469717	0.994556		-0.0447647	0.981687
-0.0400165	0.985476		-0.042545	0.992134		-0.0390872	0.99091		-0.0414621	0.983952		-0.0444881	0.980986		-0.0428456	0.987058		-0.0441802	0.991435		-0.0418702	0.987726		-0.0404128	1.00474		-0.0413989	0.969391		-0.0362132	0.986733		-0.0450316	0.989252		-0.0356072	0.986722		-0.0400231	0.991613		-0.0425962	0.999239		-0.0378907	0.98944
-0.0337661	0.989244		-0.0344197	0.993638		-0.0334624	0.998704		-0.0373995	0.988732		-0.0407382	0.994342		-0.0387829	1.0026		-0.0401175	0.994551		-0.0365601	0.998055		-0.0329112	0.999328		-0.0357684	0.990595		-0.0315288	0.99608		-0.0412855	0.996312		-0.0318574	0.998285		-0.0328362	1.00685		-0.0354093	0.996746		-0.0338318	0.990095
-0.0293916	0.997154		-0.0275457	1.00212		-0.0293998	0.989054		-0.0317766	0.98712		-0.0357391	0.986962		-0.0322217	1.0016		-0.0348056	0.992147		-0.0328103	0.988067		-0.0250987	1.0101		-0.0317096	0.990339		-0.0240291	1.00236		-0.0356627	0.987483		-0.0262345	0.994978		-0.0287773	0.997704		-0.0275968	0.996447		-0.028209	0.982557
-0.0240787	1.00438		-0.0237958	1.00957		-0.0225238	0.981807		-0.0239641	0.982646		-0.0282375	0.993156		-0.0240964	0.997394		-0.0269931	0.997732		-0.0268708	0.989202		-0.0204124	1.01699		-0.0251483	0.996809		-0.0165256	1.00797		-0.028163	0.992105		-0.018422	0.983517		-0.0243981	0.992107		-0.022283	1.00166		-0.0200837	0.984468
-0.0162662	0.996755		-0.0191075	0.99472		-0.0144004	0.991644		-0.0170862	0.988662		-0.0216762	0.985986		-0.0184735	1.00621		-0.0201171	1.00795		-0.0193711	0.996323		-0.0166625	1.00992		-0.017023	1.00386		-0.0115283	0.993753		-0.0215941	0.989219		-0.0124825	0.997713		-0.0172112	0.992413		-0.0188459	1.00994		-0.0135147	0.990982
-0.00907927	1.00384		-0.0116079	0.994553		-0.00908654	0.994574		-0.0133364	0.996371		-0.0169879	0.98929		-0.0147236	1.00517		-0.0157416	1.02059		-0.0134354	1.00748		-0.00978652	0.999269		-0.0113925	1.00295		-0.00715288	0.994438		-0.0172224	1.00689		-0.00810705	1.00959		-0.0100243	0.99486		-0.0125974	1.01184		-0.00976871	0.999245
-0.00470381	0.993635		-0.00442096	0.999101		-0.00533669	0.994028		-0.00833913	0.99821		-0.0119887	1.00054		-0.00909697	0.996675		-0.0104296	1.01364		-0.00905996	0.998221		-0.00259964	1		-0.00795931	1.00458		-0.000278798	1		-0.0119124	1.00423		-0.00248419	1		-0.00502702	1.0069		-0.00509774	1.01183		-0.00508426	1.00611
0.0002963	1		0.0002673	1		0.000288084	1		-0.00114842	1		-0.00448905	1.00584		-0.00128447	1		-0.00261714	1		-0.00343328	1		0.00271233	1.00989		-0.00202364	1		0.00784651	1.00097		-0.00441266	0.994794		0.00501551	0.991044		-0.000334942	1		0.00084174	1		0.00242306	1
0.00748414	1.00599		0.00495556	0.996726		0.00810058	1.00822		0.00572566	1.00145		0.00301255	1		0.0046512	1.00957		0.00456975	1.01293		0.00437922	1.00745		0.00708779	1.01008		0.00578886	1.00108		0.0131604	0.996419		0.00277423	1		0.0122024	0.989318		0.00653914	1.00008		0.0052172	0.987068		0.00960995	1.00096
0.0149838	1.00102		0.0121425	1.01089		0.0140382	1.00525		0.0107229	0.992617		0.00801171	0.987025		0.00902666	1.0112		0.00863241	1.01364		0.0112533	1.00348		0.013651	1.01369		0.0117322	0.995558		0.0175358	1.00131		0.0074663	1.00086		0.0165779	0.997757		0.0143516	0.994454		0.0111529	0.997945		0.0139816	0.991974
0.019984	1.00489		0.019955	1.0151		0.0184136	1.00189		0.0154112	0.998902		0.0123872	0.989336		0.0146533	1.0057		0.0130079	1.01602		0.0156288	1.00443		0.0217763	1.01791		0.0161038	0.998986		0.0240971	1.01244		0.0124636	1.00098		0.0215789	1.00123		0.0199745	0.98961		0.0189654	1.00539		0.018666	0.993227
0.0246713	0.984699		0.024956	1.00448		0.0240384	1.00693		0.0222891	1.00144		0.0195741	0.999045		0.0224658	1.00976		0.0201948	1.00776		0.0209426	0.991237		0.0280248	1.01893		0.0214139	0.998932		0.0322224	1.00402		0.0199633	1.00111		0.0290786	1.00326		0.0240333	0.994613		0.0255266	1.00509		0.0258606	1.00002
0.032171	0.998279		0.0293315	1.00264		0.0318509	1.00755		0.0301016	0.987092		0.0273866	0.99354		0.0296527	1.01348		0.0273836	0.996354		0.0284423	0.993479		0.0320874	0.991821		0.0292264	1.00323		0.0378491	0.989483		0.0274629	0.999176		0.0365783	0.99289		0.0302894	0.996858		0.0299021	1.00671		0.0336731	1.00775
0.0396716	0.991793		0.0362056	0.991335		0.0390378	0.996244		0.0354116	0.985682		0.0326985	0.988598		0.0340282	1.00179		0.0323827	0.99238		0.035942	0.993093		0.0377122	0.985554		0.0364133	1.00172		0.0412861	0.985546		0.032155	0.994587		0.0415794	0.979626		0.0384148	0.992656		0.035216	1.00205		0.0389831	0.997167
0.0443589	0.982758		0.0443309	0.990998		0.0431004	0.994998		0.0397871	0.984899		0.0367612	0.983533		0.0390293	1.00107		0.037071	1.00243		0.0406303	0.985341		0.0458375	0.993368		0.0411053	0.990583		0.0475346	0.987471		0.0365267	0.987096		0.0459548	0.980724		0.0443504	0.980319		0.0430285	0.995266		0.0433548	0.987439
0.0481088	0.975095		0.0496447	0.993112		0.0480996	0.992104		0.0463484	0.980609		0.04395	0.99883		0.0465289	0.990873		0.0439451	0.998797		0.0453147	0.985813		0.0520879	0.985998		0.0457898	0.980765		0.0550343	0.989246		0.0440264	0.992229		0.0534545	0.99304		0.0484093	0.985166		0.0502154	0.99193		0.049916	0.985428
0.0549838	0.975216		0.0537036	0.990973		0.0559121	0.975703		0.0544737	0.986846		0.0517625	0.980726		0.0540286	0.988962		0.0517576	0.981299		0.0531272	0.989378		0.0564633	0.983678		0.0532895	0.984961		0.060661	0.980201		0.0518389	0.992653		0.061267	0.976163		0.0546654	0.992463		0.0549036	0.987275		0.0580413	0.980469
0.0624835	0.975735		0.0602687	0.976632		0.0634137	0.976162		0.0601004	0.976998		0.0567616	0.955251		0.0587169	0.978886		0.0573823	0.98527		0.0603141	0.985525		0.0620881	0.982298		0.0607892	0.977001		0.0650364	0.981795		0.0565309	0.986331		0.0656425	0.964145		0.0630958	0.990196		0.0595919	0.985672		0.0636718	0.978074
0.0677964	0.966531		0.068394	0.975613		0.0677872	0.979852		0.064163	0.976603		0.0605115	0.965408		0.0634013	0.979784		0.061445	0.992194		0.0646896	0.977871		0.0702134	0.979108		0.0654812	0.971306		0.0709721	0.976536		0.060277	0.963544		0.0697051	0.96832		0.0690391	0.979779		0.0674044	0.97483		0.0677307	0.972593
0.0721709	0.96116		0.0740168	0.971168		0.0724755	0.952233		0.0707243	0.963908		0.0667619	0.960705		0.070901	0.978086		0.0680082	0.998835		0.0687522	0.969536		0.0767747	0.970064		0.0701657	0.969478		0.0787846	0.95499		0.0668382	0.970515		0.0765792	0.966202		0.0724724	0.966679		0.0749041	0.968292		0.074292	0.974219
0.0787341	0.96125		0.0774539	0.960271		0.080288	0.957221		0.0788496	0.955666		0.0745744	0.96101		0.0784046	0.972741		0.0758207	0.996558		0.0756301	0.958842		0.0805245	0.96452		0.0776654	0.964842		0.0853459	0.957461		0.0743379	0.964496		0.0837661	0.960107		0.0781029	0.96595		0.0789667	0.959364		0.0824173	0.973892
0.0865466	0.956551		0.0833934	0.963923		0.0877877	0.946526		0.0844763	0.947812		0.0801991	0.961393		0.083089	0.958232		0.0817582	0.971149		0.0831298	0.946042		0.0855256	0.96865		0.0854779	0.950916		0.0897214	0.94313		0.0796556	0.950307		0.08908	0.946736		0.0856026	0.960299		0.0833422	0.953393		0.0880478	0.950432
0.092796	0.936141		0.0912059	0.949672		0.0921632	0.941648		0.0882261	0.94581		0.0842618	0.949067		0.0868388	0.956108		0.0858209	0.96003		0.0881271	0.943225		0.0930253	0.949618		0.0895444	0.944725		0.0950352	0.945008		0.0840273	0.945883		0.0934554	0.922004		0.0921638	0.947178		0.0905291	0.943179		0.091481	0.933836
0.0968587	0.925521		0.0971415	0.94228		0.0962258	0.933867		0.093849	0.940824		0.0901994	0.948275		0.0937167	0.945567		0.0920694	0.945554		0.0925025	0.943297		0.0999013	0.94078		0.0936032	0.936795		0.102848	0.934168		0.0905886	0.944821		0.100017	0.920174		0.0965355	0.939334		0.097716	0.938301		0.0974167	0.935813
0.102483	0.923248		0.101517	0.929876		0.1031	0.928972		0.101661	0.934314		0.0980119	0.932819		0.101216	0.938359		0.100507	0.940727		0.0993766	0.945035		0.104275	0.937657		0.100477	0.919885		0.110035	0.913075		0.0984011	0.938517		0.107829	0.914724		0.10154	0.938896		0.102717	0.925999		0.105229	0.933256
0.110609	0.914148		0.107144	0.924451		0.1106	0.91103		0.107601	0.924107		0.104886	0.914237		0.106527	0.928316		0.106132	0.919774		0.107189	0.933882		0.109276	0.915104		0.107977	0.910496		0.114723	0.909494		0.10465	0.941018		0.114078	0.920582		0.10904	0.922636		0.107092	0.92197		0.111172	0.912074
0.117171	0.897768		0.114956	0.908085		0.115601	0.90259		0.111976	0.903938		0.108949	0.900761		0.110902	0.926025		0.109569	0.916691		0.112816	0.918695		0.116463	0.916988		0.112982	0.90865		0.119411	0.907828		0.108716	0.91734		0.11814	0.908041		0.11654	0.91638		0.113967	0.924076		0.115544	0.897446
0.121546	0.897665		0.122143	0.894309		0.119976	0.901245		0.117599	0.89286		0.114262	0.899161		0.117467	0.915749		0.115196	0.921323		0.117191	0.909609		0.124275	0.9081		0.117353	0.89646		0.127224	0.890346		0.114652	0.909102		0.123767	0.88861		0.121224	0.90913		0.121779	0.90449		0.121167	0.8917
0.126858	0.882042		0.126519	0.886671		0.126537	0.895048		0.125412	0.885563		0.122386	0.890171		0.12528	0.895774		0.123008	0.908246		0.123127	0.907273		0.129274	0.888		0.123915	0.891572		0.134723	0.873443		0.122464	0.89787		0.131892	0.877279		0.125909	0.891117		0.127715	0.877627		0.128979	0.886036
0.134984	0.872031		0.13152	0.885015		0.13435	0.872773		0.132599	0.877355		0.129262	0.87756		0.131215	0.876575		0.129257	0.885569		0.131252	0.89355		0.133337	0.868954		0.131727	0.871445		0.138786	0.860215		0.129025	0.879169		0.138454	0.861007		0.133103	0.88703		0.131777	0.876927		0.135854	0.874152
0.141859	0.862069		0.139019	0.875835		0.1406	0.861495		0.136974	0.865427		0.133637	0.875254		0.135278	0.87051		0.133632	0.893906		0.137505	0.86455		0.140213	0.86544		0.137976	0.875496		0.143161	0.852246		0.133092	0.87005		0.142516	0.852624		0.140916	0.871732		0.13803	0.875961		0.140233	0.851744
0.145609	0.839584		0.146519	0.856279		0.144663	0.851083		0.141975	0.85304		0.138636	0.871965		0.141214	0.861743		0.138944	0.892915		0.14188	0.849581		0.148338	0.850898		0.142042	0.855555		0.150036	0.839327		0.138715	0.866286		0.148456	0.827702		0.145913	0.845409		0.146155	0.857325		0.14523	0.842025
0.150296	0.82881		0.151207	0.835589		0.150601	0.85047		0.149475	0.848295		0.146762	0.85808		0.149339	0.851982		0.146446	0.871328		0.147503	0.843297		0.15365	0.82729		0.147978	0.840033		0.157535	0.822995		0.14684	0.859149		0.156581	0.819212		0.150285	0.83377		0.152403	0.842402		0.15273	0.836829
0.157797	0.819367		0.155892	0.828661		0.158413	0.837016		0.156975	0.829642		0.153949	0.829074		0.155591	0.841269		0.153946	0.852898		0.155628	0.831571		0.157713	0.81519		0.156103	0.830712		0.162536	0.81444		0.153401	0.833773		0.163142	0.811649		0.157471	0.828281		0.156466	0.821255		0.160229	0.813152
0.164672	0.810387		0.163391	0.815801		0.164976	0.80455		0.161663	0.806969		0.157699	0.817823		0.159967	0.818036		0.158632	0.829621		0.162189	0.814667		0.164587	0.81353		0.162664	0.800815		0.166912	0.802546		0.157155	0.81627		0.166892	0.795748		0.165284	0.800551		0.162402	0.815122		0.164922	0.795014
0.169359	0.795699		0.171204	0.807293		0.16935	0.797069		0.166351	0.800763		0.162074	0.810332		0.165589	0.800898		0.16332	0.814534		0.16563	0.791013		0.172712	0.80534		0.166731	0.790689		0.173786	0.792257		0.162152	0.813244		0.171893	0.777791		0.169976	0.788303		0.170527	0.79946		0.169606	0.793293
0.174359	0.778634		0.175579	0.778785		0.174975	0.781917		0.174164	0.793879		0.169261	0.789835		0.173715	0.794677		0.170507	0.801916		0.17094	0.780009		0.178026	0.77891		0.172354	0.784548		0.181598	0.774481		0.169339	0.80303		0.179393	0.764079		0.173722	0.786426		0.176779	0.786276		0.177106	0.780186
0.181546	0.767793		0.179642	0.768509		0.1831	0.764745		0.181976	0.773932		0.17645	0.77068		0.180276	0.772496		0.17832	0.784956		0.17844	0.773447		0.181776	0.76414		0.180479	0.766121		0.187221	0.752275		0.176213	0.785548		0.185954	0.746829		0.180283	0.775574		0.180216	0.761181		0.184605	0.760867
0.189047	0.744755		0.186516	0.759129		0.189663	0.751147		0.186352	0.758539		0.181449	0.756989		0.18403	0.750867		0.183008	0.762329		0.185005	0.754898		0.187714	0.753006		0.18704	0.739221		0.191284	0.73568		0.180905	0.762564		0.190642	0.731473		0.187791	0.748477		0.185526	0.747505		0.188985	0.742343
0.194046	0.72407		0.193707	0.738992		0.1931	0.727854		0.190101	0.74986		0.185824	0.741184		0.189027	0.747549		0.187383	0.758253		0.18969	0.734878		0.195213	0.740976		0.190481	0.723146		0.197536	0.721096		0.18559	0.749226		0.195644	0.71516		0.193414	0.741798		0.19303	0.734989		0.193043	0.728661
0.198421	0.712633		0.199017	0.726936		0.198101	0.720729		0.196976	0.736772		0.192698	0.731237		0.196527	0.738279		0.194883	0.750423		0.194691	0.728153		0.201151	0.703854		0.195478	0.724194		0.205661	0.702461		0.192777	0.739002		0.20283	0.704417		0.197785	0.724422		0.199591	0.715791		0.199918	0.710804
0.205296	0.701045		0.203392	0.709925		0.205601	0.715858		0.204475	0.717339		0.200824	0.705698		0.203405	0.713894		0.202696	0.725519		0.20219	0.713442		0.205525	0.69039		0.202978	0.709033		0.21191	0.685417		0.200589	0.712473		0.21033	0.689345		0.203721	0.701692		0.20428	0.692984		0.207417	0.688189
0.213422	0.68114		0.209954	0.690063		0.212475	0.682215		0.209789	0.695245		0.206448	0.684066		0.207776	0.700271		0.207382	0.692252		0.209377	0.69604		0.211151	0.686017		0.209852	0.686545		0.215973	0.664163		0.205899	0.688943		0.215327	0.664169		0.211846	0.690612		0.209277	0.686933		0.212735	0.676727
0.218733	0.665517		0.217766	0.674342		0.21685	0.663198		0.214161	0.681246		0.210511	0.674416		0.212777	0.676458		0.211132	0.688275		0.214378	0.677006		0.218964	0.673513		0.214232	0.661116		0.221912	0.649072		0.209966	0.676237		0.219703	0.6495		0.218102	0.663544		0.216776	0.673662		0.216794	0.669402
0.222796	0.650856		0.224018	0.652424		0.22185	0.648245		0.220726	0.66113		0.216761	0.659118		0.220277	0.653232		0.217695	0.678889		0.219067	0.664596		0.225838	0.650693		0.219229	0.649855		0.230034	0.63878		0.21684	0.672641		0.226581	0.636069		0.222474	0.642541		0.22428	0.652298		0.223355	0.653306
0.229671	0.635597		0.228081	0.633655		0.229351	0.633391		0.228851	0.64472		0.224887	0.644777		0.227777	0.633349		0.225195	0.64625		0.225941	0.644636		0.230213	0.630972		0.226728	0.641822		0.236286	0.612579		0.224965	0.650922		0.234706	0.625329		0.227784	0.63214		0.229277	0.628475		0.231168	0.629607
0.238108	0.614658		0.234017	0.622063		0.236851	0.617525		0.234787	0.630509		0.230824	0.620595		0.232778	0.620267		0.230509	0.631902		0.234066	0.631604		0.235212	0.620253		0.234228	0.615568		0.240036	0.584984		0.230275	0.629224		0.240016	0.601105		0.235596	0.616676		0.233653	0.616847		0.237416	0.611869
0.243421	0.588896		0.242142	0.604494		0.24185	0.600351		0.239162	0.615177		0.234887	0.601917		0.237153	0.613587		0.234882	0.629887		0.23938	0.608999		0.243025	0.608072		0.239233	0.597817		0.245037	0.58256		0.234342	0.604021		0.244392	0.579929		0.242478	0.600002		0.24084	0.6008		0.241483	0.59056
0.246858	0.577437		0.248394	0.587142		0.246225	0.588704		0.244789	0.595265		0.241137	0.599906		0.244027	0.598536		0.241132	0.613593		0.243442	0.590705		0.250214	0.587578		0.243605	0.578676		0.252536	0.57645		0.241216	0.591564		0.251266	0.578162		0.24685	0.577461		0.248652	0.58555		0.247418	0.577365
0.253109	0.56725		0.25277	0.567027		0.2531	0.571846		0.25291	0.575196		0.249574	0.587248		0.252153	0.576777		0.248945	0.588204		0.250629	0.57577		0.2549	0.566582		0.250479	0.575692		0.259098	0.557206		0.249341	0.583493		0.259391	0.554605		0.25216	0.561621		0.253966	0.574354		0.255543	0.567982
0.260608	0.556823		0.258393	0.558175		0.261225	0.563101		0.259475	0.5551		0.255511	0.56349		0.257466	0.556349		0.255195	0.562415		0.258442	0.553449		0.259588	0.548715		0.258604	0.560044		0.263786	0.536734		0.254651	0.55656		0.264705	0.523824		0.259972	0.551598		0.258029	0.548077		0.261792	0.546035
0.266859	0.541708		0.266518	0.539685		0.266539	0.537634		0.263538	0.540745		0.25895	0.541523		0.261529	0.543048		0.259571	0.545597		0.263439	0.533981		0.267401	0.533791		0.263914	0.539204		0.268787	0.529691		0.258405	0.547055		0.268142	0.514106		0.267159	0.532894		0.265216	0.530611		0.265858	0.529385
0.271233	0.519018		0.273079	0.523446		0.270912	0.516608		0.269161	0.530423		0.264575	0.536487		0.268403	0.528498		0.265196	0.54813		0.267193	0.528705		0.274901	0.511832		0.267981	0.51866		0.275974	0.513415		0.264028	0.54018		0.27439	0.514711		0.271226	0.516535		0.273341	0.523387		0.271481	0.512197
0.276859	0.500745		0.276829	0.503703		0.277788	0.510282		0.277286	0.516109		0.272075	0.522947		0.276841	0.514892		0.273008	0.532939		0.273754	0.522424		0.278963	0.501531		0.274855	0.510493		0.283474	0.492504		0.27184	0.529182		0.28189	0.492122		0.275597	0.510362		0.278029	0.503029		0.279919	0.494301
0.284671	0.488425		0.28183	0.49288		0.285914	0.496465		0.283851	0.486541		0.278636	0.501706		0.282151	0.49226		0.279882	0.507474		0.281254	0.507338		0.283339	0.486058		0.283293	0.487546		0.288471	0.476924		0.278089	0.506575		0.28783	0.474457		0.283097	0.499251		0.281779	0.486473		0.286481	0.474936
0.291547	0.473113		0.28933	0.479831		0.291225	0.46709		0.287601	0.479326		0.282699	0.476504		0.285592	0.471243		0.284258	0.483943		0.287189	0.48127		0.290213	0.472227		0.28829	0.46073		0.293159	0.463769		0.282468	0.483743		0.291892	0.464349		0.289971	0.477541		0.288027	0.471869		0.290234	0.465312
0.295921	0.455442		0.295891	0.469492		0.294663	0.454572		0.292599	0.471503		0.288012	0.463072		0.291841	0.465899		0.289257	0.473439		0.291252	0.470024		0.2974	0.460241		0.292044	0.450482		0.300037	0.450435		0.287778	0.472761		0.297828	0.448138		0.294976	0.452404		0.29584	0.461888		0.295232	0.452935
0.300921	0.440362		0.300579	0.449465		0.300913	0.442873		0.300098	0.45921		0.295825	0.458963		0.29934	0.458841		0.297382	0.460845		0.297192	0.46373		0.302713	0.442113		0.298292	0.446143		0.30785	0.430261		0.29559	0.461098		0.30564	0.430184		0.29966	0.438298		0.301467	0.454675		0.302731	0.443162
0.308734	0.42379		0.30558	0.429266		0.308413	0.433115		0.306976	0.437861		0.303012	0.43816		0.305276	0.444123		0.304571	0.438919		0.305004	0.445243		0.3074	0.420597		0.305792	0.435654		0.31316	0.412129		0.302777	0.444483		0.312518	0.418564		0.306535	0.437564		0.305842	0.442998		0.309605	0.425657
0.316233	0.41159		0.312767	0.423898		0.31435	0.408821		0.311661	0.41716		0.3077	0.418524		0.309964	0.426798		0.308321	0.423789		0.311878	0.421767		0.313963	0.411119		0.311728	0.419722		0.317535	0.407108		0.307149	0.424293		0.31689	0.401529		0.314347	0.415673		0.311778	0.42248		0.314297	0.413646
0.320609	0.396973		0.32058	0.413732		0.318726	0.393842		0.316349	0.404326		0.312386	0.402185		0.315591	0.413832		0.312694	0.416188		0.315941	0.395921		0.321776	0.394124		0.315794	0.400806		0.324409	0.399305		0.312154	0.41292		0.321891	0.387302		0.319978	0.396055		0.319903	0.406364		0.318982	0.39424
0.325296	0.381244		0.325581	0.38902		0.324663	0.388137		0.323536	0.40428		0.319886	0.400654		0.323403	0.40302		0.320196	0.406935		0.321255	0.380471		0.327713	0.376404		0.32173	0.385515		0.332534	0.370021		0.319966	0.400176		0.329703	0.377534		0.324036	0.383231		0.326151	0.386294		0.326169	0.381665
0.333109	0.364455		0.329956	0.374389		0.332476	0.37768		0.331348	0.386165		0.327386	0.389479		0.330278	0.383615		0.32707	0.387501		0.329067	0.378059		0.331776	0.361024		0.329542	0.375978		0.337536	0.353937		0.327153	0.38601		0.33689	0.356844		0.330598	0.375033		0.330527	0.372586		0.333668	0.368747
0.340921	0.350998		0.33683	0.367216		0.339037	0.359476		0.336349	0.361867		0.332387	0.362717		0.334653	0.365056		0.332071	0.376378		0.336254	0.367912		0.337713	0.355706		0.336416	0.35646		0.341285	0.3405		0.331838	0.367899		0.341579	0.339865		0.33841	0.35833		0.335841	0.363068		0.338979	0.354221
0.345297	0.337395		0.344956	0.353131		0.343412	0.344326		0.340725	0.347967		0.336762	0.348772		0.339967	0.354682		0.336757	0.361572		0.34063	0.34931		0.345839	0.342809		0.340796	0.339658		0.347534	0.337926		0.33653	0.349446		0.346267	0.335296		0.344346	0.338663		0.343966	0.353383		0.343358	0.341816
0.349358	0.326699		0.35027	0.32868		0.348726	0.332307		0.347599	0.34167		0.343949	0.341243		0.347779	0.35041		0.343633	0.347975		0.345627	0.33904		0.3524	0.321452		0.345793	0.335811		0.355034	0.327307		0.344342	0.340404		0.354079	0.324781		0.348412	0.328648		0.35084	0.330031		0.350232	0.330076
0.356233	0.320627		0.354641	0.316908		0.356539	0.317394		0.355724	0.327486		0.352075	0.322328		0.354966	0.327896		0.351446	0.330434		0.353439	0.322707		0.356463	0.309171		0.353605	0.328475		0.360973	0.307287		0.351842	0.330249		0.361579	0.302921		0.354661	0.319531		0.355216	0.310103		0.358044	0.311538
0.363421	0.307304		0.361206	0.306518		0.363726	0.296832		0.361038	0.308379		0.356761	0.306371		0.359342	0.308246		0.356758	0.311048		0.360943	0.303225		0.362087	0.29899		0.360792	0.306876		0.365036	0.296585		0.356214	0.311		0.365955	0.285812		0.363099	0.306088		0.360217	0.305488		0.363667	0.291073
0.368734	0.290928		0.369332	0.292518		0.368101	0.286037		0.365101	0.292169		0.360513	0.296445		0.364339	0.295926		0.361133	0.298102		0.364693	0.2855		0.370213	0.285292		0.365477	0.288537		0.370971	0.282642		0.359967	0.303316		0.370017	0.272272		0.369035	0.28295		0.368342	0.295435		0.367734	0.280411
0.373109	0.273125		0.374642	0.27725		0.3731	0.276064		0.371975	0.289104		0.367074	0.283816		0.372151	0.283666		0.367695	0.294108		0.369064	0.278501		0.376776	0.264321		0.370169	0.277542		0.379097	0.269472		0.366841	0.291091		0.377204	0.263579		0.372475	0.2728		0.375529	0.27341		0.374608	0.276174
0.379984	0.264204		0.378079	0.269711		0.380913	0.264708		0.3801	0.273597		0.374574	0.266438		0.379651	0.267175		0.37582	0.283757		0.376255	0.275495		0.380526	0.249385		0.377981	0.267852		0.385662	0.247344		0.374341	0.276907		0.384391	0.254232		0.378098	0.269067		0.379592	0.253698		0.382733	0.258555
0.387796	0.254594		0.384331	0.26282		0.3881	0.250852		0.385414	0.250995		0.379887	0.260122		0.383714	0.248726		0.381757	0.260846		0.383755	0.259129		0.385525	0.245306		0.385481	0.251369		0.389724	0.237208		0.379338	0.26349		0.389392	0.237171		0.385598	0.252023		0.383967	0.243384		0.388043	0.237165
0.393734	0.233952		0.391831	0.245635		0.392475	0.232341		0.388851	0.23984		0.384261	0.247983		0.387776	0.242226		0.38582	0.250474		0.388439	0.239186		0.393025	0.235854		0.38954	0.235332		0.395034	0.230024		0.38403	0.248089		0.39408	0.224721		0.392159	0.231943		0.391154	0.236534		0.391484	0.227277
0.397796	0.220843		0.397766	0.229078		0.396538	0.227516		0.395099	0.235186		0.390511	0.229036		0.394967	0.231563		0.392071	0.239771		0.393127	0.228583		0.399901	0.219489		0.393606	0.228472		0.402847	0.213635		0.390592	0.240268		0.400642	0.216306		0.396539	0.21848		0.398028	0.225365		0.397732	0.221788
0.403734	0.212327		0.402142	0.218191		0.403414	0.215218		0.402599	0.216809		0.398637	0.219296		0.402467	0.217904		0.400196	0.225077		0.400005	0.218078		0.404589	0.206237		0.400793	0.218696		0.410034	0.19307		0.398404	0.224875		0.408454	0.200169		0.401849	0.209697		0.403029	0.213116		0.405232	0.209979
0.411858	0.202166		0.408081	0.203424		0.410914	0.192163		0.408539	0.201554		0.404887	0.203421		0.407464	0.206019		0.405821	0.211643		0.407818	0.205258		0.409588	0.198023		0.40798	0.203961		0.414409	0.179087		0.40434	0.205674		0.414081	0.181754		0.409348	0.196809		0.407717	0.202634		0.411168	0.197589
0.418109	0.184447		0.415894	0.19298		0.415913	0.183582		0.413223	0.191121		0.409263	0.189562		0.41184	0.19422		0.40957	0.196693		0.413441	0.190443		0.416775	0.187266		0.412977	0.189997		0.41941	0.168682		0.408406	0.190212		0.418452	0.169689		0.416535	0.183284		0.414591	0.193173		0.415234	0.181838
0.422484	0.173504		0.422455	0.174815		0.420288	0.17608		0.41885	0.18497		0.414575	0.180943		0.418714	0.180793		0.415195	0.189942		0.417503	0.17424		0.424275	0.170132		0.417669	0.176507		0.427223	0.163062		0.414342	0.184464		0.424392	0.160052		0.421227	0.165995		0.422404	0.173261		0.42117	0.168974
0.428109	0.162356		0.426831	0.16299		0.427162	0.164883		0.426662	0.173063		0.4227	0.171868		0.426839	0.168712		0.422695	0.174371		0.424065	0.166553		0.429276	0.156257		0.424231	0.166421		0.434723	0.150148		0.422467	0.176732		0.432517	0.15242		0.425912	0.157408		0.428027	0.157012		0.428982	0.156377
0.436233	0.154953		0.432144	0.155806		0.435288	0.150286		0.433536	0.157079		0.429574	0.156475		0.432466	0.152798		0.429258	0.154761		0.431877	0.154963		0.433651	0.146382		0.432356	0.15382		0.438785	0.135597		0.429029	0.157506		0.439078	0.137602		0.433411	0.15206		0.432089	0.148358		0.435857	0.144969
0.442796	0.136963		0.439957	0.142953		0.440912	0.133903		0.437912	0.143878		0.433637	0.139965		0.436528	0.143032		0.433634	0.144687		0.437817	0.140245		0.440525	0.140952		0.437979	0.140651		0.443161	0.126939		0.433087	0.142852		0.443141	0.124661		0.440911	0.136958		0.438655	0.139613		0.440228	0.135786
0.446546	0.122286		0.447144	0.12954		0.444975	0.124295		0.442913	0.131815		0.438949	0.133694		0.442777	0.133783		0.438946	0.138776		0.442192	0.128858		0.448338	0.124195		0.442045	0.127079		0.450348	0.120744		0.438718	0.136769		0.449081	0.119368		0.445908	0.122496		0.44678	0.130397		0.445233	0.126291
0.451546	0.118996		0.451832	0.116905		0.451225	0.121334		0.450725	0.126891		0.447074	0.126325		0.450902	0.121932		0.446445	0.132649		0.44844	0.124175		0.45365	0.110129		0.448294	0.119425		0.457534	0.106289		0.446843	0.128468		0.457206	0.110235		0.450288	0.114451		0.452716	0.118865		0.453046	0.11821
0.459046	0.108114		0.456517	0.109738		0.459351	0.110405		0.458225	0.111235		0.454263	0.114287		0.456842	0.109769		0.453632	0.119386		0.456566	0.117573		0.458025	0.102608		0.456419	0.107196		0.462536	0.0990258		0.453404	0.117485		0.463454	0.0951781		0.457474	0.104636		0.456778	0.109513		0.460232	0.103882
0.465921	0.0989514		0.464329	0.102562		0.465601	0.0982915		0.4626	0.101303		0.458012	0.0996015		0.460904	0.099014		0.45832	0.106432		0.462505	0.099662		0.464901	0.0960519		0.462668	0.095415		0.466911	0.0916103		0.45715	0.105122		0.467204	0.0837505		0.4656	0.0944562		0.463027	0.0997445		0.464604	0.0934067
0.470297	0.0890295		0.471829	0.0892329		0.469664	0.0875155		0.467602	0.0964677		0.462386	0.094846		0.467153	0.0951202		0.463007	0.0968603		0.466255	0.088983		0.473024	0.0848156		0.466726	0.0891682		0.473785	0.0847215		0.462155	0.0991046		0.472205	0.0816936		0.470284	0.083268		0.471152	0.0898815		0.469296	0.0877144
0.475296	0.0842364		0.475891	0.0803658		0.475601	0.083918		0.475414	0.0908204		0.469888	0.0870692		0.475278	0.0852396		0.470508	0.0955919		0.471565	0.0851983		0.478026	0.0725768		0.47267	0.0831977		0.481598	0.0740906		0.469655	0.0915312		0.479705	0.0746278		0.474038	0.0795284		0.477091	0.079911		0.477109	0.080794
0.482796	0.0786604		0.480267	0.0768343		0.483725	0.0760463		0.482914	0.0776292		0.476762	0.0790044		0.481526	0.0742046		0.478008	0.0842661		0.479065	0.0787283		0.481775	0.0698507		0.480795	0.0730822		0.487224	0.0637684		0.476529	0.0802865		0.486266	0.0654623		0.480599	0.0766372		0.480528	0.0737008		0.484608	0.071133
0.490296	0.0696763		0.487145	0.0696875		0.489975	0.065078		0.486976	0.0656883		0.48145	0.0706991		0.485276	0.0664974		0.483007	0.0728524		0.48563	0.0659812		0.488026	0.0636776		0.487356	0.0618067		0.491287	0.0580107		0.480901	0.0714128		0.490955	0.0577367		0.488099	0.0654255		0.486151	0.0680869		0.48898	0.0626989
0.495296	0.0583885		0.494644	0.0604673		0.493725	0.0612102		0.491348	0.0596626		0.486136	0.0634437		0.490277	0.0635468		0.487383	0.0662234		0.490314	0.0596108		0.495525	0.0547207		0.490789	0.0571866		0.497535	0.0549337		0.485906	0.0646142		0.495956	0.0508016		0.493409	0.0565375		0.493964	0.0630867		0.493047	0.0568352
0.499672	0.0531732		0.499642	0.0537821		0.498726	0.0562296		0.498226	0.0571825		0.493325	0.0613271		0.497777	0.0572035		0.494882	0.0574023		0.495315	0.0577311		0.501463	0.0510143		0.496107	0.0541133		0.505661	0.0488291		0.493093	0.0593982		0.503455	0.0475282		0.497788	0.0519811		0.500216	0.0566316		0.500233	0.0518306
0.506546	0.0516004		0.504017	0.0501498		0.506538	0.0488767		0.505726	0.0520918		0.501138	0.0518513		0.504651	0.0485998		0.502695	0.0508574		0.502815	0.0509199		0.505838	0.0469696		0.503607	0.0483696		0.511596	0.0405513		0.500905	0.0519775		0.510955	0.0415293		0.50435	0.0460668		0.504592	0.0506706		0.50742	0.0469645
0.514671	0.0437726		0.510582	0.0458516		0.5131	0.0433892		0.511036	0.0435409		0.50645	0.0429438		0.509339	0.0411732		0.50707	0.0464408		0.510315	0.0456033		0.511463	0.0411838		0.510168	0.0403695		0.515659	0.037819		0.505902	0.0448202		0.515643	0.0359774		0.512162	0.0409459		0.509902	0.0457843		0.51273	0.0398892
0.519984	0.0366283		0.518704	0.0388176		0.517475	0.0368334		0.515411	0.0416887		0.510825	0.0405848		0.514341	0.0412521		0.51082	0.0404893		0.515003	0.0391093		0.519276	0.0362025		0.51454	0.0364786		0.521911	0.0320326		0.510274	0.0395935		0.520328	0.0335257		0.518411	0.03585		0.517401	0.042475		0.51711	0.0370159
0.524047	0.0320806		0.524643	0.0326899		0.522787	0.0342815		0.521976	0.0378688		0.517386	0.0357469		0.521527	0.0378176		0.517694	0.0393951		0.519691	0.0361872		0.52615	0.0307411		0.519545	0.0323464		0.530349	0.0277672		0.517156	0.0369932		0.527206	0.0301021		0.522477	0.0313159		0.524592	0.0366469		0.523671	0.0333743
0.530922	0.0302135		0.528706	0.0290293		0.530289	0.0318514		0.529789	0.0328929		0.525199	0.0338265		0.529027	0.0316423		0.525196	0.0334479		0.526878	0.0323879		0.530525	0.0265774		0.527044	0.0296433		0.536285	0.0247159		0.525281	0.0331574		0.535018	0.0270174		0.528413	0.0307817		0.529276	0.0336102		0.531796	0.0293528
0.539046	0.0281933		0.534954	0.0268189		0.537476	0.0283569		0.535724	0.0271396		0.531136	0.0260919		0.534028	0.0287881		0.530508	0.0287817		0.534691	0.028691		0.535837	0.0252001		0.534544	0.0251929		0.539722	0.0217484		0.530591	0.0282755		0.540328	0.0242902		0.536225	0.0260932		0.533965	0.0306184		0.537732	0.0249589
0.544046	0.0242381		0.54308	0.0239234		0.542475	0.0240051		0.539787	0.0240322		0.535199	0.0242853		0.538404	0.0245009		0.534883	0.0253899		0.539692	0.0249442		0.54365	0.0236709		0.539541	0.0232732		0.545036	0.0210705		0.53465	0.0261039		0.544704	0.0216426		0.542786	0.0220696		0.541464	0.0286266		0.541486	0.0210492
0.547796	0.0220102		0.549332	0.020144		0.54685	0.0199456		0.546036	0.0216445		0.541762	0.0235368		0.545591	0.0231826		0.541445	0.0232775		0.544067	0.0225221		0.550839	0.0181806		0.543921	0.0197075		0.552536	0.0187343		0.541524	0.0232182		0.551578	0.0202756		0.547166	0.0183377		0.548964	0.0275232		0.547734	0.0194469
0.554046	0.0189159		0.553395	0.0176167		0.554037	0.0192387		0.554161	0.0182936		0.549888	0.0204432		0.553403	0.0209794		0.549257	0.0212551		0.551254	0.0207246		0.555212	0.0168009		0.551107	0.0174249		0.559097	0.0149299		0.549649	0.020395		0.559703	0.0177923		0.552476	0.0161006		0.553965	0.0233065		0.555859	0.0172161
0.561546	0.016847		0.55933	0.0155536		0.56185	0.0166625		0.560413	0.0152087		0.555512	0.017391		0.558717	0.0171971		0.555507	0.0181028		0.559067	0.016323		0.5599	0.0165032		0.55892	0.0159159		0.563785	0.0132853		0.554654	0.0187302		0.564704	0.014159		0.560601	0.0151965		0.558653	0.0208134		0.562108	0.014753
0.567484	0.0137467		0.567456	0.0141849		0.567164	0.0138851		0.564476	0.0139584		0.559262	0.015479		0.56278	0.0147775		0.55957	0.0164931		0.563755	0.0144549		0.567713	0.0145226		0.56423	0.0137691		0.568786	0.0126555		0.5584	0.0164377		0.568454	0.0120305		0.567475	0.0127264		0.56584	0.0198627		0.566167	0.0135717
0.571859	0.01367		0.573704	0.0123545		0.571226	0.0125871		0.570412	0.013685		0.564887	0.0150473		0.569966	0.0126648		0.565508	0.0150701		0.567818	0.0138401		0.575213	0.0118681		0.568289	0.012169		0.576599	0.0112647		0.564656	0.014469		0.574702	0.0113032		0.571221	0.0114448		0.573653	0.0164378		0.57211	0.0135637
0.577797	0.0124661		0.577454	0.0114843		0.578413	0.0119758		0.578537	0.012052		0.572699	0.0126648		0.577779	0.0102027		0.57332	0.0148685		0.574379	0.0121369		0.579275	0.0112637		0.575476	0.011956		0.584099	0.00950423		0.572156	0.0124853		0.582515	0.0119063		0.575913	0.0113662		0.578341	0.0153193		0.580235	0.0118928
0.585609	0.0100716		0.582455	0.0107688		0.586538	0.00998116		0.584789	0.0104547		0.578637	0.0112589		0.582776	0.0100635		0.579883	0.0134061		0.581879	0.0105144		0.583651	0.00983236		0.583601	0.00983105		0.588787	0.0102367		0.578092	0.0106616		0.588142	0.00987455		0.583413	0.0104848		0.582404	0.0130997		0.586484	0.00934643
0.592171	0.00991374		0.589955	0.0103833		0.591538	0.00979993		0.588539	0.00927113		0.583012	0.0106627		0.586526	0.00958507		0.584257	0.0123432		0.587505	0.00931722		0.590525	0.00947147		0.588606	0.00870865		0.593158	0.00909461		0.58215	0.00965297		0.592517	0.00853731		0.590287	0.00838771		0.588965	0.0120118		0.59023	0.00833598
0.596546	0.00846952		0.59652	0.00931992		0.595287	0.00917762		0.593536	0.00897379		0.588324	0.00932951		0.593091	0.00807007		0.589571	0.0101104		0.591877	0.00860272		0.597714	0.00800439		0.592352	0.00847799		0.600662	0.00841502		0.588094	0.00903699		0.598453	0.00792856		0.594971	0.007292		0.596465	0.0107094		0.595235	0.00827984
0.601859	0.00725218		0.601204	0.00813349		0.601538	0.00892427		0.601036	0.00680775		0.596137	0.00855329		0.600591	0.00773418		0.597696	0.00913106		0.597816	0.0080954		0.603025	0.00735583		0.598608	0.00866329		0.608162	0.00603302		0.595906	0.00834292		0.606265	0.00812093		0.599664	0.00658259		0.601779	0.0100252		0.602734	0.00872681
0.609671	0.00697755		0.606205	0.00677615		0.60935	0.00854587		0.607914	0.00628053		0.603324	0.00794416		0.606214	0.00682759		0.604257	0.00838548		0.605942	0.00738195		0.607401	0.00728987		0.606108	0.00663726		0.613159	0.00564374		0.60278	0.00699329		0.61283	0.00660163		0.60685	0.00661524		0.605841	0.00857833		0.609608	0.00732459
0.617171	0.0059455		0.614018	0.00685169		0.614975	0.0076613		0.612285	0.00555785		0.608012	0.00747078		0.610589	0.00602186		0.608007	0.00728239		0.61219	0.00620797		0.613962	0.00601086		0.611731	0.00537987		0.617847	0.0052476		0.607152	0.00682472		0.616893	0.00594437		0.614663	0.00646115		0.612403	0.00863899		0.614293	0.00659694
0.621546	0.00532404		0.621517	0.00665504		0.61935	0.00738985		0.617287	0.00588021		0.612698	0.0061247		0.616529	0.00637112		0.613008	0.0070988		0.616566	0.00629418		0.622088	0.00557081		0.616102	0.00540967		0.625034	0.00639413		0.612149	0.00551076		0.622203	0.00549425		0.619973	0.00594808		0.620215	0.00757402		0.619298	0.00573107
0.626547	0.00563934		0.626206	0.00627672		0.625288	0.00644019		0.624786	0.0047324		0.6202	0.00512575		0.624341	0.00536806		0.620508	0.00774724		0.62188	0.00560918		0.627712	0.00540577		0.622046	0.00568979		0.632847	0.00550361		0.619962	0.00521539		0.630015	0.00522877		0.624039	0.00506537		0.626467	0.00643527		0.626485	0.00538364
0.634359	0.00568092		0.630894	0.00569585		0.633101	0.00543867		0.632286	0.00420743		0.6277	0.00467688		0.631215	0.00456145		0.627382	0.00654778		0.629692	0.00462257		0.631775	0.00587323		0.629858	0.00498356		0.637535	0.00516553		0.627156	0.00498418		0.637202	0.00440585		0.630601	0.00506451		0.630839	0.00562824		0.633984	0.00444112
0.641859	0.00379574		0.638081	0.00534053		0.639664	0.00458517		0.637287	0.00412075		0.632386	0.0047802		0.635278	0.00464323		0.631757	0.00522558		0.636566	0.00526689		0.638025	0.00498202		0.636732	0.00476996		0.641285	0.00470961		0.631841	0.00481017		0.641578	0.00378069		0.638726	0.00365571		0.636466	0.00553244		0.638982	0.00423073
0.645921	0.00314434		0.645893	0.0043537		0.644037	0.00470482		0.641975	0.00365452		0.637074	0.00444335		0.640592	0.00350248		0.636759	0.00458525		0.640942	0.00451192		0.646151	0.00339128		0.640791	0.0039186		0.647846	0.00431567		0.636525	0.00447608		0.646579	0.00383787		0.644349	0.00310188		0.644278	0.0050759		0.643353	0.00451259
0.649984	0.00269355		0.650894	0.00338438		0.649351	0.00465161		0.648849	0.00431488		0.644574	0.0040986		0.648717	0.00390984		0.643945	0.00413555		0.646252	0.0034174		0.652088	0.00383546		0.646101	0.00301929		0.655349	0.00388744		0.644338	0.00366391		0.654391	0.00324856		0.648415	0.00333003		0.651152	0.00424224		0.650235	0.00417931
0.657171	0.00278494		0.655266	0.00332277		0.657164	0.0035804		0.656662	0.00381671		0.652387	0.00376992		0.655591	0.00404117		0.651445	0.00482133		0.654377	0.00324625		0.656151	0.00371931		0.653914	0.00294608		0.660972	0.00258362		0.651837	0.00321541		0.661891	0.0027893		0.654977	0.00336332		0.655528	0.00394959		0.658047	0.00303961
0.664672	0.00328897		0.662144	0.00362175		0.664038	0.00351396		0.661976	0.00391232		0.656762	0.00365026		0.659967	0.00323632		0.656757	0.00464087		0.661255	0.00281987		0.662401	0.00296469		0.661108	0.00334023		0.665348	0.00258142		0.655904	0.00252374		0.665954	0.00259552		0.663102	0.00349116		0.660529	0.00370757		0.663357	0.00275633
0.669671	0.00391203		0.670269	0.00339915		0.668413	0.00311989		0.666351	0.00279691		0.660512	0.00274646		0.665277	0.00298966		0.661133	0.0042562		0.665317	0.00270816		0.670525	0.00239865		0.66548	0.00248044		0.671283	0.00245917		0.659963	0.00252896		0.670329	0.00225201		0.668725	0.00286925		0.668654	0.00301293		0.667729	0.00270232
0.674046	0.00317359		0.675267	0.00279908		0.673725	0.00301131		0.673225	0.00248147		0.667386	0.00336797		0.673089	0.00302145		0.668009	0.00416428		0.669689	0.00305993		0.676462	0.00201733		0.670477	0.0020783		0.679409	0.00172666		0.666837	0.00281628		0.677516	0.00259083		0.672166	0.00342927		0.675841	0.00268776		0.674603	0.00317947
0.680921	0.00260673		0.679016	0.00292652		0.681538	0.0035253		0.681351	0.00268722		0.674888	0.00344546		0.680589	0.00241677		0.675821	0.00349156		0.677193	0.00221138		0.680212	0.00275773		0.678289	0.00259663		0.685661	0.00142141		0.674336	0.00272123		0.684703	0.00155164		0.677789	0.00265711		0.679591	0.00290229		0.682729	0.00286082
0.689047	0.00254275		0.685269	0.00302252		0.688725	0.00244087		0.686352	0.00237961		0.6802	0.00368478		0.684651	0.0025527		0.681133	0.00270315		0.684067	0.0021549		0.685526	0.00198732		0.685789	0.00206167		0.690036	0.00208116		0.679341	0.00226425		0.689391	0.00144807		0.685601	0.00168774		0.683966	0.00277309		0.687733	0.00276577
0.694671	0.00182555		0.692768	0.00282503		0.692787	0.00244384		0.690101	0.00284449		0.684575	0.00268952		0.689027	0.00223545		0.685508	0.00207822		0.689068	0.00231466		0.693026	0.00208123		0.689543	0.00113169		0.695347	0.00203534		0.683713	0.00155148		0.69408	0.00250039		0.69185	0.00146258		0.691466	0.00260527		0.691479	0.00255184
0.699046	0.0018139		0.698391	0.00321791		0.697163	0.0021732		0.69635	0.00245824		0.691136	0.00289169		0.696214	0.00242028		0.692383	0.00254254		0.693752	0.00251615		0.699587	0.00276575		0.693914	0.00146753		0.703159	0.00128054		0.690587	0.0017244		0.700954	0.00243337		0.696221	0.00115526		0.698653	0.00201779		0.697736	0.00221313
0.705296	0.00178991		0.702767	0.00318056		0.70435	0.00231338		0.70385	0.00236173		0.698949	0.00301926		0.703405	0.00181208		0.700508	0.00291781		0.70063	0.00271259		0.703962	0.0024879		0.701101	0.00198522		0.710037	0.00118769		0.6984	0.00175311		0.708766	0.00178549		0.701539	0.00146664		0.703341	0.00211752		0.705235	0.00151945
0.713422	0.00164597		0.708706	0.00393255		0.711538	0.002352		0.709789	0.00160822		0.705199	0.00271562		0.708402	0.00211618		0.70582	0.00227695		0.708443	0.00217429		0.708963	0.00195007		0.708288	0.00210249		0.714409	0.000870925		0.70403	0.000774326		0.714393	0.00166482		0.709351	0.00111086		0.708029	0.0019689		0.710858	0.00157606
0.719359	0.00225327		0.716832	0.00211693		0.716538	0.00130295		0.713848	0.001883		0.709262	0.00206564		0.71309	0.00158363		0.709257	0.00214064		0.713753	0.0015169		0.716463	0.00200362		0.713293	0.00213856		0.71941	0.00110832		0.708402	0.00189862		0.718455	0.00198325		0.716538	0.000629596		0.714903	0.00246233		0.71523	0.00133901
0.723421	0.00230993		0.723393	0.0020108		0.720913	0.00161869		0.719787	0.00201681		0.715199	0.00168082		0.719964	0.000927637		0.715194	0.00176954		0.718128	0.00167477		0.723963	0.0025443		0.717665	0.000890669		0.727535	0.00160784		0.71465	0.00181488		0.724704	0.00217797		0.72091	0.00169607		0.722716	0.00141612		0.721173	0.00183787
0.729671	0.00249454		0.727455	0.00221335		0.727787	0.0023331		0.727913	0.00225875		0.723012	0.00145177		0.728089	0.000610824		0.723007	0.00194295		0.724689	0.0013681		0.728962	0.00185539		0.724539	0.00122802		0.734409	0.00190967		0.722775	0.00154278		0.732829	0.0024158		0.725915	0.00133923		0.728339	0.00152589		0.728986	0.00189377
0.737796	0.00171063		0.732769	0.00260011		0.7356	0.00156872		0.734474	0.00178202		0.729886	0.00189722		0.733403	0.000962059		0.728945	0.00345709		0.732815	0.0011059		0.733337	0.00187065		0.732664	0.00117079		0.738472	0.00137486		0.729024	0.0016163		0.738765	0.00254866		0.733414	0.000907258		0.732401	0.00147591		0.735547	0.00154681
0.743734	0.00114903		0.740895	0.00230471		0.741226	0.00207245		0.738849	0.00136137		0.733949	0.00212125		0.737466	0.00105853		0.73332	0.00338266		0.738441	0.00160774		0.740526	0.00210451		0.738295	0.00138892		0.742847	0.00185258		0.73309	0.00215419		0.742828	0.00138059		0.740914	0.00132365		0.738967	0.00164024		0.739918	0.00159846
0.747484	0.00106243		0.748082	0.00229226		0.745287	0.00208758		0.744163	0.000757757		0.739573	0.00250528		0.744027	0.0012131		0.738632	0.00199544		0.742504	0.00169184		0.748339	0.00142439		0.742353	0.0016105		0.750347	0.00181951		0.739026	0.00150558		0.748767	0.000762699		0.745599	0.00126282		0.747092	0.000590322		0.745229	0.00133359
0.752484	0.00143942		0.752457	0.00228129		0.75185	0.00167811		0.751976	0.00133121		0.747699	0.00213997		0.752153	0.000794334		0.746757	0.00175753		0.749065	0.000852769		0.753338	0.00104695		0.748602	0.0015658		0.757221	0.00116295		0.747151	0.00116714		0.757205	0.00116385		0.749978	0.00117852		0.753028	0.000947788		0.753041	0.00105102
0.760297	0.00137659		0.757454	0.0023889		0.759975	0.00159141		0.759163	0.00190333		0.754262	0.00190723		0.758092	0.000801131		0.753633	0.0014909		0.757191	0.00123595		0.757713	0.00142362		0.756727	0.00134335		0.762222	0.000690615		0.7534	0.000474601		0.763454	0.00131639		0.757478	0.00137295		0.75709	0.000813138		0.760236	0.00108074
0.766859	0.00150043		0.765267	0.00224732		0.765913	0.0016168		0.763538	0.0017302		0.758012	0.00210307		0.762155	0.000889269		0.758007	0.00214403		0.76313	0.00196415		0.7649	0.0019004		0.762671	0.00138762		0.76691	0.000448569		0.757154	0.000888082		0.766891	0.00186258		0.76529	0.0012259		0.763342	0.000378854		0.764607	0.00185178
0.771233	0.0011657		0.772454	0.00198421		0.769976	0.00177886		0.768535	0.000924633		0.763011	0.00125488		0.768403	0.000826125		0.763008	0.00137939		0.766567	0.00122962		0.772713	0.00153796		0.767042	0.00118288		0.773784	0.000763621		0.762151	0.000765843		0.772517	0.00213462		0.769662	0.00140517		0.771777	0.000931203		0.769604	0.00150152
0.776546	0.00202068		0.776516	0.00244629		0.776226	0.00221479		0.776348	0.000862306		0.770512	0.000934902		0.776528	0.00111334		0.77082	0.000984008		0.77219	0.00132489		0.777712	0.00189419		0.773291	0.00103364		0.781597	0.000729323		0.769963	0.000918533		0.780017	0.00127702		0.773415	0.00091985		0.777403	0.00119286		0.777417	0.000535888
0.784046	0.00138802		0.780892	0.00204012		0.784662	0.00158682		0.783539	0.0011096		0.777387	0.00158541		0.782464	0.0010616		0.778007	0.000836459		0.780003	0.00132615		0.781464	0.00111913		0.781416	0.00111398		0.786911	0.00103262		0.776525	0.00154278		0.786578	0.00117627		0.780289	0.000584991		0.780841	0.001599		0.784604	0.00050098
0.791547	0.000934254		0.788079	0.00162256		0.7906	0.00252487		0.787601	0.00141521		0.781762	0.0012446		0.785901	0.000278445		0.782696	0.00150761		0.786568	0.000750335		0.788025	0.00163937		0.787352	0.00117035		0.790973	0.00145375		0.780904	0.00113626		0.790954	0.00121329		0.787789	0.000862653		0.786467	0.000927711		0.78867	0.000397906
0.796234	0.00102907		0.795269	0.00195868		0.794039	0.00185368		0.791973	0.00114289		0.786761	0.00137824		0.791528	0.000950439		0.787382	0.00150108		0.790939	0.000584671		0.795525	0.00149269		0.791105	0.000642949		0.797535	0.00193294		0.785901	0.000501789		0.795955	0.00118236		0.793099	0.00104662		0.79428	0.000637024		0.793042	0.0004998
0.800921	0.00123471		0.800267	0.00248934		0.799664	0.00181559		0.799164	0.00108816		0.79395	0.00149816		0.799028	0.00137227		0.795194	0.00150291		0.796253	0.00119126		0.801149	0.00120967		0.796415	0.000648996		0.80566	0.00122787		0.793401	0.00089091		0.803767	0.00122008		0.797471	0.00147603		0.800215	0.000650118		0.800229	0.000896763
0.808109	0.000798309		0.804642	0.0022545		0.807476	0.00176292		0.806351	0.00103276		0.801762	0.0013814		0.805589	0.00157266		0.802696	0.00256317		0.803753	0.00111307		0.805525	0.000580778		0.803915	0.000298905		0.811599	0.000524025		0.8009	0.000794554		0.810954	0.0012079		0.80404	0.00112687		0.804591	0.00066103		0.807416	0.000832371
0.815921	0.00149563		0.811516	0.00227496		0.814037	0.00142368		0.811352	0.000966184		0.806762	0.00182579		0.809964	0.00158845		0.80707	0.00189045		0.81094	0.000554531		0.811462	0.00106196		0.810476	0		0.815662	0.000904733		0.805905	0.00098248		0.815642	0.000685609		0.811852	0.000793504		0.810217	0.00104687		0.812421	0.000515367
0.820922	0.00148443		0.819641	0.0021836		0.818413	0.00157007		0.816036	0.00101176		0.811137	0.00123195		0.815278	0.00116311		0.811132	0.00151283		0.815628	0.000824526		0.819275	0.000719441		0.814856	0.000749855		0.821911	0.00129549		0.810277	0.00121826		0.820331	0.000640855		0.818101	0.000911313		0.817717	0.000790878		0.817105	0.000824824
0.824983	0.00179928		0.825268	0.00174494		0.823725	0.00217158		0.822601	0.000810031		0.817698	0.00146363		0.822778	0.00111619		0.818008	0.00203304		0.820629	0.00111159		0.825838	1.68154e-05		0.820166	0.00106669		0.830349	0.00122664		0.817151	0.00108732		0.82783	0.00076434		0.82216	0.00133389		0.824904	0.000477713		0.823979	0.00109725
0.832171	0.00155732		0.829331	0.00192745		0.831225	0.00121706		0.830414	0.000860965		0.825824	0.00141224		0.830278	0.000669802		0.825508	0.00204558		0.827816	0.00169142		0.830214	0.000720734		0.827665	0.000557208		0.835972	0.000916737		0.824964	0.00142076		0.83533	0.000982956		0.828103	0.00139834		0.829592	0.000945824		0.831792	0.00115244
0.840296	0.00105215		0.835579	0.00238637		0.838413	0.00147878		0.836349	0.000919048		0.831448	0.000560888		0.834966	0.000790388		0.830507	0.00153451		0.835628	0.00125534		0.835526	0.00135351		0.834852	0.000637118		0.839409	0.000906448		0.830281	0.00132049		0.840327	0.00172386		0.836228	0.0010558		0.834277	0.0014015		0.837422	0.00141072
0.844984	0.000650254		0.843705	0.00214942		0.8431	0.00207434		0.840412	0.00094876		0.835511	0.000281762		0.839654	0.000325364		0.834882	0.00152276		0.84063	0.00146653		0.843651	0.00099599		0.839857	0.00044879		0.845035	0.000997828		0.834653	0.00146317		0.844703	0.00112495		0.842789	0.000675482		0.841776	0.00168236		0.841481	0.00100809
0.848734	0.00123265		0.849644	0.0024503		0.847788	0.00182856		0.84666	0.00128207		0.842387	0.0014125		0.846841	0.00086274		0.841446	0.00128694		0.845005	0.000778157		0.850525	0.000675462		0.844229	0.000968635		0.852848	0.00042603		0.841527	0.00151603		0.851894	0.001169		0.846848	0.00116806		0.849589	0.00116559		0.848042	0.0011614
0.855296	0.00148832		0.853707	0.00266805		0.855288	0.00156845		0.854786	0.00163302		0.850512	0.00160781		0.854653	0.000621567		0.849571	0.001347		0.852505	0.00109115		0.8549	0.000948906		0.851728	0.00122219		0.859096	0.000217302		0.849652	0.00098596		0.860015	0.000914302		0.852471	0.00143569		0.854277	0.00145431		0.855855	0.00141095
0.862796	0.00204535		0.859955	0.00226779		0.8631	0.00165434		0.861038	0.00138885		0.855824	0.000924095		0.859655	0.000692604		0.855196	0.00161729		0.860317	0.00104752		0.860212	0.00128728		0.859541	0.000973818		0.863472	0.000431175		0.85465	0.000577699		0.864703	0.00099725		0.860596	0.00164122		0.858653	0.000784113		0.861798	0.00104913
0.868421	0.00126601		0.868393	0.0019034		0.868101	0.00237253		0.865101	0.00106828		0.859574	0.000710863		0.864026	0.000844542		0.859569	0.000905663		0.865002	0.000680993		0.868025	0.0011926		0.864538	0.00138525		0.869098	0.000812863		0.858403	0.00159607		0.868453	0.00115658		0.867165	0.000822743		0.866152	0.000468548		0.865857	0.00111234
0.873109	0.000978122		0.874329	0.00315144		0.872475	0.0016033		0.871036	0.00115205		0.865512	0.000742228		0.871217	0.00136942		0.865507	0.00173089		0.868755	0.000980283		0.874901	0.00107696		0.868918	0.000798665		0.876598	0.00121293		0.864652	0.00134659		0.875018	0.00123485		0.870599	0.000859665		0.873965	0.000792406		0.872105	0.0011824
0.879046	0.00140104		0.87777	0.0026767		0.879664	0.00160438		0.879474	0.00134462		0.873011	0.00108198		0.879029	0.000807489		0.873632	0.00202886		0.875629	0.000711132		0.878964	0.000784892		0.876104	0.000791106		0.883785	0.00117495		0.872464	0.00104947		0.882518	0.000700137		0.875596	0.00102571		0.878653	0.00128234		0.880543	0.00104654
0.887171	0.000708059		0.883393	0.00262712		0.887789	0.00185962		0.885414	0.00128497		0.878949	0.00106827		0.883714	0.000689096		0.879883	0.00228348		0.883129	0.000703755		0.883337	0.000868451		0.883917	0.00124702		0.888473	0.000594826		0.878087	0.00139835		0.888141	0.00113034		0.883103	0.0012419		0.882403	0.000678925		0.886479	0.00130976
0.893734	0.000582852		0.890892	0.00233278		0.892475	0.00196522		0.888851	0.00138371		0.883325	0.000977601		0.887776	0.00106598		0.883945	0.00205916		0.888439	0.000813777		0.890526	0.00115535		0.888601	0.00119692		0.893161	0.000394917		0.882466	0.00136225		0.892516	0.00106848		0.889977	0.00166192		0.889277	0.00095128		0.88992	0.000943936
0.897796	0.000717427		0.897145	0.00260011		0.896225	0.00136804		0.894474	0.00131468		0.888949	0.00156933		0.894342	0.000914921		0.889883	0.0022639		0.892815	0.00159994		0.897713	0.000853446		0.892668	0.000463692		0.900661	0.000999053		0.888402	0.000744092		0.898456	0.000752155		0.894662	0.00117361		0.896777	0.00120421		0.895543	0.00140411
0.903108	0.00153447		0.901516	0.00257838		0.902788	0.000648503		0.901974	0.00129502		0.896762	0.00120269		0.901528	0.00156017		0.898008	0.00196854		0.89938	0.00105637		0.902712	0.000775061		0.899229	0.000845963		0.908161	0.000635493		0.896214	0.00061511		0.906268	0.00118353		0.899659	0.000340409		0.902091	0.00130831		0.903043	0.000886856
0.911234	0.0017417		0.90683	0.00224585		0.910601	0.00178939		0.908226	0.000839296		0.903949	0.000607014		0.907151	0.00170794		0.904569	0.00120938		0.907192	0.000967848		0.907087	0.00136075		0.906729	0.000469739		0.913162	0.00120631		0.902776	0.000275582		0.91283	0.000788708		0.906846	0.000850701		0.906466	0.000957173		0.909604	0.000706655
0.918109	0.00211138		0.914643	0.00129826		0.915913	0.00220048		0.912914	0.00116813		0.908324	0.00136954		0.911527	0.00137052		0.908008	0.000738267		0.913441	0.000912838		0.913963	0.000998059		0.912039	5.03215e-05		0.917534	0.00135575		0.907155	0.000644039		0.916892	0.00105138		0.914353	0.000423857		0.912715	0.000689618		0.913983	0.00204826
0.922484	0.0012868		0.92183	0.00196058		0.920288	0.00272474		0.917911	0.00116277		0.913323	0.00180655		0.917779	0.00103112		0.913007	0.000313378		0.917503	0.00111834		0.921776	0.00114371		0.916418	0.00061876		0.925037	0.000751862		0.912465	0.00105426		0.922515	0.00140824		0.91935	0.000522458		0.92084	0.00121643		0.919293	0.00155294
0.927796	0.00244199		0.926518	0.00175169		0.926539	0.00257402		0.925724	0.00120857		0.920825	0.00132684		0.925904	0.000878526		0.920507	0.00170817		0.923443	0.000821575		0.927401	0.000798344		0.922667	0.000703853		0.932537	0.000206523		0.920278	0.00060467		0.930328	0.00129577		0.923722	0.00109144		0.927092	0.000564352		0.926793	0.000689672
0.935609	0.00242668		0.931206	0.00225787		0.934351	0.00151686		0.933224	0.000857614		0.928325	0.000755671		0.932153	0.000772848		0.927383	0.00184893		0.931255	0.000920425		0.931776	0.00052283		0.930479	0.00104941		0.937221	0.00121954		0.927464	0.000580309		0.937205	0.00205776		0.930596	0.000382453		0.931155	0.000781931		0.934293	0.000248603
0.942796	0.000799451		0.938706	0.00235366		0.9406	0.0011047		0.937912	0.00135824		0.933011	0.000782028		0.936528	0.00153715		0.931757	0.00187113		0.937817	0.000742326		0.938025	0.000480662		0.93704	0.000523733		0.941284	0.00127932		0.931844	0.000661657		0.941581	0.00130374		0.938721	0.000235405		0.936778	0.000273447		0.938985	0.000414888
0.946859	0.000518878		0.946205	0.00247984		0.944975	0.00139235		0.942287	0.00130284		0.937699	0.00126832		0.942151	0.00105919		0.936758	0.00166822		0.942192	0.000960893		0.94615	0.00117009		0.941107	0.000565847		0.947849	0.00131337		0.936841	0.000897217		0.946578	0.000739268		0.944039	0.00071966		0.944903	0.000398276		0.943356	0.000171239
0.951234	0.000589478		0.951207	0.00252204		0.9506	0.00210649		0.949787	0.000687387		0.945512	0.00143807		0.949964	0.000483222		0.944257	0.00122139		0.947815	0.00182673		0.952087	0.00164817		0.94673	0.000912483		0.955349	0.000668322		0.944654	0.000950507		0.954703	0.000548769		0.948098	0.00104876		0.951464	0.000789133		0.950856	0.000209685
0.958733	0.000696407		0.955895	0.00180908		0.958412	0.00226287		0.957599	0.000495937		0.953011	0.00158382		0.956842	0.000195569		0.951757	0.00261305		0.955627	0.0012526		0.95615	0.00133178		0.954855	0.00150144		0.960972	0.000448324		0.952153	0.000893302		0.961578	0.00114042		0.954972	0.000885916		0.955527	0.000759671		0.958356	0.000843457
0.965921	0.000740503		0.963082	0.00233024		0.965288	0.00188474		0.962601	0.00117484		0.957074	0.000801006		0.961217	0.000736672		0.956758	0.00136737		0.962505	0.00213487		0.9624	0.00030811		0.961729	0.00115718		0.965347	0.000268259		0.955899	0.000944634		0.96564	0.000721694		0.963097	0.00101055		0.961154	0.000506302		0.963361	0.000681889
0.970608	0.00159068		0.970894	0.00295458		0.969664	0.00216888		0.966976	0.000806457		0.961137	0.00103664		0.966527	0.000928076		0.961132	0.00162852		0.966255	0.00191188		0.970526	0.000772991		0.965796	0.00129454		0.971599	0.000315297		0.960279	0.00100401		0.970328	0.000853145		0.968415	0.000581576		0.969279	0.000300508		0.967732	0.000966107
0.975296	0.00143234		0.975579	0.00281575		0.974976	0.00216321		0.974163	0.00123292		0.968011	0.000729577		0.974652	0.000499885		0.968321	0.00165464		0.971252	0.00116745		0.976463	0.00128625		0.971106	0.000785059		0.979412	0.00102135		0.967465	0.00105382		0.977515	0.00108207		0.971848	0.00111086		0.97584	0.00133821		0.975232	0.000858788
0.982171	0.0015427		0.979332	0.00292146		0.982788	0.00178696		0.981975	0.000684706		0.975512	0.000737747		0.981526	0.000896504		0.976133	0.00114905		0.978439	0.00152112		0.9799	0.00106222		0.979231	0.00026543		0.98566	0.000803554		0.974652	0.000780851		0.984706	0.00183446		0.978097	0.00151082		0.97959	0.00143139		0.983044	0.000998893
0.990296	0.000907065		0.985894	0.00237814		0.989975	0.00232499		0.986664	0.00142616		0.980824	0.00117976		0.985276	0.000917113		0.981445	0.000775611		0.985317	0.00126587		0.985525	0.00160212		0.986105	0.0010114		0.990036	0.000822663		0.97965	0.000382595		0.989703	0.00212478		0.985596	0.00112047		0.984591	0.000772983		0.987729	0.00110079
0.995609	0.00053967		0.993393	0.00313773		0.993725	0.00224937		0.990726	0.00164464		0.9852	0.00130154		0.989965	0.000756185		0.985508	0.00177738		0.990002	0.001327		0.993025	0.00137447		0.989851	0.000995416		0.995659	0.0011289		0.984029	0.000524192		0.994079	0.00164959		0.99154	0.000706428		0.992091	0.000958264		0.991482	0.000756187
0.999672	0.00143988		0.998707	0.00267417		0.998413	0.00202573		0.997288	0.00147195		0.991761	0.00162073		0.997464	0.000554477		0.992695	0.00192493		0.99469	0.00103002		0.999588	0.00128185		0.994543	0.000741648		1.00347	0.00166909		0.990903	0.000916793		1.00095	0.00125968		0.995911	0.000558526		0.998965	0.000840418		0.998044	0.000643207
1.00623	0.00150043		1.00308	0.002479		1.00591	0.00117303		1.00479	0.00124074		0.999886	0.00140855		1.00434	0.00062661		1.00082	0.00223178		1.00188	0.00109052		1.00396	0.00135843		1.00204	0.00101701		1.01004	0.00152504		0.998715	0.00134093		1.00908	0.00096468		1.00153	0.000201684		1.00365	0.000757707		1.00554	0.000668444
1.01436	0.00133295		1.00933	0.00290648		1.01279	0.00210297		1.0101	0.00096127		1.00551	0.00175541		1.00934	0.00121244		1.00582	0.00208266		1.00969	0.00131709		1.00928	0.0013667		1.00892	0.00140166		1.01441	0.00094736		1.00434	0.00137617		1.01439	0.000869547		1.00935	0.000624687		1.00834	0.00111234		1.01117	0.000694862
1.0203	0.00271754		1.01746	0.00300058		1.01748	0.00277876		1.01448	0.00121393		1.00989	0.00147418		1.01403	0.0010263		1.00957	0.00146426		1.015	0.00142184		1.01678	0.000539645		1.01391	0.00128352		1.01972	0.00109778		1.0084	0.000328001		1.01845	0.00122102		1.01653	0.00114629		1.01553	0.00142659		1.01555	0.000846051
1.02436	0.00199052		1.0237	0.00237012		1.02216	0.00249786		1.02073	0.00112345		1.01582	0.000940701		1.0209	0.000922594		1.01582	0.00119502		1.01938	0.000919793		1.02427	0.000875953		1.01861	0.000986777		1.02785	0.00125482		1.01497	0.00043893		1.02502	0.00168356		1.02091	0.0010844		1.02334	0.000713406		1.02148	0.00107602
1.03061	0.00152259		1.02777	0.00215702		1.02904	0.00166596		1.02854	0.00061255		1.02395	0.000920405		1.02903	0.000524002		1.02332	0.00136711		1.02594	0.000956888		1.02896	0.00081904		1.02548	0.000889158		1.03472	0.00104193		1.02309	0.000913095		1.03314	0.00121798		1.02591	0.000807804		1.02834	0.000178733		1.02961	0.000941106
1.03873	0.000679499		1.03339	0.00255981		1.03716	0.00121436		1.0351	0.00155148		1.0302	0.000439644		1.03434	0.00113461		1.02895	0.0010741		1.03407	0.000673194		1.03365	0.000815418		1.03329	0.00065202		1.03847	0.000685961		1.02903	0.00123696		1.03908	0.00159382		1.03372	0.00106007		1.03272	0.00050783		1.03586	0.000715618
1.04467	0.00055612		1.04152	0.00243047		1.04247	0.00235119		1.03947	0.00173176		1.03457	0.00111861		1.0384	0.00120499		1.03363	0.000898612		1.03938	0.000327956		1.04084	0.00118174		1.0386	0.000760654		1.04316	0.000740347		1.03309	0.00123544		1.04283	0.00130514		1.04091	0.000985371		1.03959	0.000596869		1.04023	0.000860204
1.04811	0.00133181		1.04808	0.00220871		1.04654	0.00163166		1.04479	0.00172819		1.0402	0.00181656		1.04496	0.00107124		1.03926	0.00123628		1.04344	0.00138664		1.04865	0.00141793		1.04267	0.00142477		1.05066	0.000650193		1.03934	0.000425879		1.04939	0.00127163		1.0456	0.000548709		1.0474	0.000873371		1.04554	0.00103003
1.05373	0.00123471		1.05246	0.00174705		1.0531	0.00175239		1.05291	0.00146994		1.04832	0.0018105		1.05309	0.00128633		1.04707	0.00147392		1.05032	0.00161596		1.05365	0.000872073		1.04954	0.00134356		1.05754	0.00125237		1.04778	0.000278844		1.05783	0.00100522		1.05029	0.000516269		1.05303	0.00067456		1.05367	0.000891102
1.06155	0.00215776		1.05777	0.00266995		1.06123	0.000982073		1.05979	0.000281925		1.05489	0.00077992		1.05903	0.00124116		1.05395	0.00121095		1.05844	0.00150847		1.05803	0.00144069		1.05767	0.00100513		1.06222	0.00130578		1.05372	0.000469381		1.06345	0.00100334		1.0581	0.000796065		1.05709	0.000700748		1.06054	0.000925538
1.0678	0.00145405		1.06589	0.00256361		1.06716	0.000627165		1.06416	0.000835722		1.05832	0.00128019		1.06309	0.00078118		1.05832	0.00202207		1.06376	0.000752022		1.06521	0.00110723		1.06329	0.000937535		1.06691	0.000968429		1.05715	0.00101358		1.06689	0.000703652		1.06529	0.00115931		1.06397	0.000938623		1.06461	0.00051749
1.07217	0.00125321		1.07277	0.00288073		1.07123	0.00194956		1.06916	0.000979812		1.06332	0.00170639		1.06934	0.000815382		1.06332	0.00280421		1.0675	0.000826633		1.07302	0.00087259		1.06736	0.000446199		1.0741	0.00154464		1.06247	0.000722124		1.07252	0.000933282		1.06966	0.00115077		1.07209	0.00106389		1.06992	0.000448617
1.07748	0.00123242		1.07683	0.00235831		1.07747	0.00234714		1.07729	0.000661027		1.07114	0.00145968		1.07747	0.0012302		1.07113	0.0019291		1.07344	0.000759188		1.07771	0.00163782		1.07392	0.000389182		1.08191	0.0012825		1.07028	0.000722776		1.08033	0.00191085		1.07372	0.00114245		1.0774	0.00110252		1.07805	0.000718212
1.08498	0.000931513		1.0812	0.00212663		1.0856	0.00141234		1.08448	0.00165849		1.0777	0.00128519		1.08309	0.0012348		1.07832	0.00135954		1.08094	0.00138074		1.08146	0.00128133		1.08204	0.000671457		1.08722	0.000836627		1.07684	0.00147579		1.08658	0.0012079		1.0806	0.000748472		1.08084	0.00103966		1.08492	0.000597921
1.09248	0.00120546		1.08871	0.00203675		1.09122	0.00185124		1.08823	0.00130887		1.08239	0.0015124		1.08684	0.000998673		1.08301	0.00142874		1.08719	0.00171945		1.08803	0.00144147		1.08767	0.000575998		1.0916	0.00060487		1.0809	0.00135768		1.09095	0.00121962		1.0881	0.000513067		1.08709	0.000750724		1.08898	0.000738497
1.09717	0.00155389		1.09589	0.00188145		1.09497	0.00111226		1.09291	0.00122398		1.08739	0.0016679		1.09247	0.000462174		1.08801	0.00198316		1.09156	0.00124817		1.09553	0.00138145		1.09141	0.000604722		1.09816	0.00127221		1.08622	0.00115692		1.09627	0.0012789		1.0931	0.00107821		1.09459	0.000273665		1.09336	0.00163856
1.10186	0.000783001		1.10058	0.00287504		1.1006	0.00122813		1.1001	0.00130843		1.09489	0.00118846		1.10028	0.00107388		1.09582	0.00134753		1.09719	0.000822207		1.10115	0.0011362		1.09704	0.0010939		1.10597	0.00161887		1.09372	0.00134267		1.10377	0.000645775		1.09747	0.00105751		1.10053	0.000473349		1.10086	0.000894168
1.10936	0.0013245		1.10527	0.00298581		1.10841	0.00131456		1.10698	0.00127112		1.10239	0.000769113		1.10653	0.00121354		1.10301	0.000540578		1.10469	0.000622188		1.10553	0.00134756		1.10486	0.00140382		1.11191	0.00116393		1.10122	0.000979653		1.11095	0.00117767		1.10404	0.000350866		1.1049	0.000642043		1.10773	0.000839447
1.11686	0.00166219		1.11214	0.00271426		1.11466	0.00153712		1.11198	0.0014409		1.10739	0.00154745		1.1109	0.000806832		1.10707	0.00123027		1.11188	0.00105258		1.11146	0.00132712		1.11111	0.00148027		1.11597	0.000784445		1.1059	0.000709509		1.11564	0.00116244		1.11216	0.00147347		1.11084	0.000717116		1.11242	0.000645329
1.12186	0.00132952		1.11996	0.00289761		1.11904	0.00151848		1.11666	0.00144671		1.11145	0.0015145		1.11622	0.000662567		1.11113	0.00235008		1.11625	0.0016676		1.11959	0.000599663		1.11548	0.00105697		1.12254	0.00052672		1.11028	0.000428924		1.12033	0.000834869		1.11778	0.00121736		1.11865	0.000801136		1.11711	0.00049013
1.12623	0.00166036		1.12527	0.00235388		1.12435	0.00125811		1.12354	0.00172841		1.11864	0.00171192		1.12403	0.000924348		1.11832	0.00245871		1.12125	0.00131224		1.12584	0.000633811		1.12079	0.00120232		1.13066	0.000444159		1.11778	0.000641646		1.12783	0.00155937		1.12216	0.000983663		1.12522	0.000805064		1.12429	0.000688257
1.13373	0.00126738		1.12964	0.00183883		1.13216	0.00103339		1.13166	0.0016987		1.12645	0.00140169		1.13122	0.000980037		1.12551	0.00182673		1.12907	0.00124037		1.13021	0.000895614		1.12861	0.000621784		1.13628	0.000780035		1.12559	0.00082805		1.13533	0.00095601		1.1281	0.0014009		1.12959	0.00177795		1.13211	0.000713259
1.14155	0.000965784		1.1362	0.00226125		1.13935	0.00181289		1.13697	0.00137433		1.13176	0.00133844		1.13559	0.00131505		1.13051	0.00183509		1.13657	0.00102244		1.13552	0.0010661		1.13548	0.00120599		1.13972	0.000548768		1.13059	0.000809562		1.14033	0.00172621		1.13622	0.001784		1.13459	0.00139102		1.13742	0.000387292
1.14592	0.00129525		1.14402	0.00266341		1.14404	0.00202897		1.14135	0.00160398		1.13614	0.000989462		1.14059	0.000756624		1.13488	0.00271281		1.14125	0.000261985		1.14365	0.000927176		1.14017	0.00126387		1.14566	0.000377768		1.13497	0.000813694		1.14471	0.00161303		1.14247	0.00155201		1.1424	0.000910907		1.14148	0.000544615
1.14998	0.00101422		1.14996	0.0027919		1.14873	0.00164813		1.14791	0.00132295		1.14301	0.000219822		1.14809	0.00038171		1.14176	0.00171		1.14594	0.000231845		1.15053	0.00055853		1.14517	0.00153707		1.15316	0.000166346		1.14216	0.00106426		1.15221	0.00118611		1.14685	0.00186617		1.14959	0.00137924		1.14805	0.000442721
1.15655	0.00100143		1.15402	0.00271848		1.15623	0.00167136		1.15572	0.00135243		1.15114	0.000900374		1.15559	0.00082174		1.14988	0.00136972		1.15376	0.000690266		1.15459	0.00159125		1.15236	0.000754823		1.15941	0.000280019		1.14997	0.000566606		1.16002	0.00123344		1.15247	0.0015089		1.15428	0.00113198		1.15617	0.00115692
1.16405	0.000307077		1.16027	0.00327741		1.16373	0.00130484		1.16166	0.0018095		1.15614	0.00173169		1.16028	0.000530141		1.15551	0.00188575		1.16125	0.00107956		1.1599	0.00168387		1.15986	0.00104509		1.16378	0.000418926		1.15497	0.00076084		1.1647	0.00106614		1.1606	0.0013992		1.15896	0.000628949		1.16211	0.000993232
1.16936	0.000678814		1.16871	0.0029377		1.16873	0.00148445		1.16573	0.000797521		1.15989	0.00176411		1.16496	0.000727902		1.15957	0.00169747		1.16563	0.00112002		1.16803	0.00177467		1.16485	0.00134313		1.16941	0.00061663		1.15841	0.00075388		1.16845	0.00084307		1.16716	0.000747405		1.16678	0.000587921		1.16617	0.00159752
1.17373	0.000899297		1.17433	0.00255221		1.1731	0.00230474		1.17197	0.000777862		1.16614	0.00172589		1.17246	0.000944739		1.16582	0.00241771		1.16969	0.000950354		1.1749	0.00137757		1.16923	0.000572542		1.17691	0.00123154		1.16497	0.00142837		1.17502	0.00132037		1.1706	0.000993695		1.17428	0.000703585		1.17242	0.00134656
1.1803	0.00131376		1.17808	0.00246191		1.1806	0.00211918		1.18041	0.00100662		1.17364	0.00212943		1.18028	0.00122472		1.17394	0.00245245		1.17657	0.00142248		1.17865	0.00111965		1.17673	0.0010507		1.1841	0.00112106		1.17278	0.00122174		1.18252	0.00196427		1.1756	0.000682311		1.17865	0.00139364		1.18055	0.000950304
1.18811	0.00155275		1.1837	0.00195826		1.18841	0.00168054		1.18604	0.00112144		1.17957	0.00220771		1.18465	0.000714309		1.18019	0.00197507		1.18375	0.00146547		1.18334	0.00131703		1.18455	0.000902764		1.18847	0.000909878		1.17809	0.000431752		1.18783	0.00144034		1.18341	0.000802468		1.18272	0.00114638		1.18617	0.000602638
1.19436	0.00149746		1.1912	0.00243448		1.1931	0.00156602		1.18948	0.00109955		1.18395	0.00156063		1.1884	0.000864055		1.18426	0.0015695		1.18907	0.00122098		1.19084	0.000926399		1.18923	0.000428057		1.19347	0.000440485		1.18246	0.000263836		1.1922	0.000276493		1.18997	0.00179702		1.18959	0.0011861		1.18992	0.000785434
1.19873	0.00106677		1.19746	0.00240451		1.19685	0.00233877		1.1951	0.000914133		1.18989	0.001728		1.19528	0.00130606		1.19019	0.00187374		1.19375	0.00135777		1.19771	0.000483766		1.19298	0.00060645		1.20097	0.00077734		1.18872	0.0012026		1.19845	0.000571263		1.19435	0.00199593		1.19678	0.00106782		1.19555	0.000574098
1.20436	0.00119152		1.20183	0.00278367		1.20373	0.00148958		1.20291	0.00105979		1.1977	0.000774384		1.20278	0.0012006		1.19832	0.00241589		1.20032	0.00159425		1.2024	0.0012133		1.19986	0.000746184		1.20847	0.000932172		1.19684	0.00122696		1.20627	0.000935625		1.19935	0.00139898		1.20209	0.00125397		1.20305	0.000951484
1.21217	0.00145359		1.20745	0.00226188		1.21123	0.00111523		1.20885	0.000835945		1.20457	0.00144518		1.20809	0.00112671		1.20457	0.00211139		1.20813	0.00134386		1.20709	0.000651403		1.20736	0.00102263		1.21316	0.000826828		1.20309	0.00144969		1.21252	0.00094406		1.20685	0.00049514		1.20647	0.00101151		1.20929	0.00126283
1.21905	0.00133409		1.21495	0.00148035		1.21654	0.00257861		1.21323	0.000641591		1.20864	0.00156748		1.21246	0.000615209		1.20832	0.00171757		1.21438	0.00113646		1.21396	0.000903634		1.21267	0.000860433		1.21754	0.000593356		1.20746	0.0010995		1.21689	0.00129155		1.21435	3.26536e-05		1.21303	0.000901086		1.21367	0.000666086
1.22311	0.00180316		1.22214	0.00227771		1.22091	0.00200979		1.21885	0.00115696		1.21395	0.00105905		1.21903	0.00131571		1.21363	0.000943008		1.21844	0.00117524		1.22178	0.00217152		1.21704	0.00147509		1.22504	0.000702375		1.21278	0.000562474		1.22252	0.00140519		1.21935	0.000793718		1.22084	0.00101304		1.21898	0.000634008
1.22873	0.00103296		1.22652	0.00220301		1.22748	0.00132239		1.22635	0.0012251		1.22176	0.000456513		1.22684	0.000917113		1.22113	0.00231247		1.22438	0.000463058		1.2274	0.00192213		1.2233	0.00104682		1.23285	0.000749412		1.22091	0.000694936		1.23033	0.00104154		1.22373	0.00119282		1.22678	0.000922474		1.2268	0.00153454
1.23686	0.00134095		1.23152	0.00254588		1.2356	0.00162085		1.23385	0.000533021		1.22895	0.00079178		1.23309	0.000720229		1.22738	0.00251225		1.2325	0.00102454		1.23146	0.000779976		1.23142	0.00119173		1.23722	0.00119798		1.22778	0.000357799		1.2372	0.000667567		1.23091	0.00122483		1.23084	0.000736757		1.23398	0.00161427
1.24342	0.000993431		1.23902	0.00245937		1.24185	0.0025011		1.23854	0.000442546		1.23332	0.000989462		1.23715	0.000623321		1.23207	0.00233963		1.23875	0.000942767		1.23803	0.000695382		1.23767	0.00126128		1.24097	0.000503691		1.23184	0.000540941		1.24127	0.00151884		1.23872	0.00107501		1.23709	0.00143139		1.23835	0.000816568
1.24717	0.000362826		1.24652	0.00313498		1.24591	0.00192444		1.24322	0.000628634		1.23832	0.00080944		1.24309	0.000995385		1.23738	0.00238768		1.24313	0.00143196		1.24615	0.000557496		1.24173	0.00158869		1.24785	0.000628144		1.23715	0.00115388		1.24689	0.00169457		1.24403	0.000907685		1.24522	0.00129391		1.24336	0.00133052
1.25186	0.0004284		1.25152	0.00226484		1.25185	0.00246274		1.25072	0.000816509		1.24614	0.000859519		1.2509	0.00123941		1.24488	0.00216753		1.24875	0.0015502		1.25209	0.000833009		1.24735	0.00163189		1.25535	0.000786895		1.24527	0.000887429		1.25502	0.000334369		1.24841	0.000717953		1.25147	0.00104228		1.25086	0.00141378
1.25936	0.000896327		1.25589	0.00244566		1.25966	0.00136426		1.25822	0.00131044		1.25364	0.00101503		1.25778	0.000892777		1.25207	0.00168441		1.25688	0.000523549		1.25615	0.000662786		1.25548	0.000839916		1.26035	0.000673956		1.25246	0.000622288		1.26158	0.000511278		1.25529	0.000813139		1.25553	0.00041879		1.25836	0.000895348
1.26623	0.00102542		1.26339	0.0029299		1.26623	0.00132807		1.26323	0.00192723		1.2577	0.00105008		1.26184	0.00065007		1.25707	0.00234799		1.26344	0.00114215		1.26271	0.000773509		1.26205	0.000564551		1.26503	0.00122027		1.25622	0.000642299		1.26533	0.00136911		1.26341	0.00100159		1.26147	0.000891484		1.26304	0.00111423
1.27123	0.00155618		1.27121	0.00290943		1.2706	0.00159141		1.2676	0.00102762		1.26176	0.000898528		1.26746	0.00184365		1.26145	0.00138748		1.26719	0.0014543		1.27084	0.0017294		1.2661	0.00123255		1.2716	0.00134669		1.26059	0.00081935		1.27033	0.00174097		1.26841	0.00134477		1.26959	0.000621311		1.26742	0.000889923
1.27592	0.00133044		1.27558	0.00240873		1.27623	0.00136696		1.2751	0.000605401		1.26895	0.000721933		1.27559	0.00179586		1.26863	0.000850822		1.27219	0.00160837		1.27646	0.00163627		1.27173	0.00108202		1.27941	0.00087754		1.26809	0.000832835		1.27783	0.000757779		1.27216	0.00105046		1.27584	0.00100584		1.27492	0.000801237
1.28311	0.000404866		1.27964	0.00217938		1.28404	0.00117735		1.2826	0.000715758		1.27645	0.00151714		1.28215	0.000936407		1.27645	0.00131645		1.27969	0.000895133		1.28021	0.00122908		1.27985	0.000999087		1.28535	0.000826828		1.27497	0.00140183		1.28471	0.00126906		1.27841	0.000599076		1.27959	0.00191871		1.28273	0.000510178
1.29061	0.000492603		1.28652	0.00221462		1.29091	0.00144799		1.28729	0.000677781		1.28145	0.000983663		1.2859	0.00137688		1.28176	0.00184449		1.28625	0.000926538		1.28584	0.00129039		1.28673	0.00156947		1.28941	0.000828053		1.27965	0.000699286		1.28939	0.00166365		1.28591	0.00100287		1.28459	0.00148661		1.28742	0.000488007
1.29623	0.000609356		1.29371	0.00252246		1.29466	0.00207867		1.29135	0.000929548		1.28582	0.00105008		1.2909	0.00127142		1.28582	0.00102266		1.29094	0.00133185		1.29334	0.00150511		1.29048	0.00185693		1.29535	0.000541174		1.28434	0.000768235		1.29408	0.0016531		1.29185	0.00112111		1.2924	0.000615637		1.29117	0.000712551
1.30061	0.000457417		1.29902	0.00271869		1.29935	0.0013305		1.29791	0.00106783		1.2927	0.00168504		1.2984	0.000659059		1.29301	0.00170791		1.29594	0.000434393		1.29959	0.00166912		1.29548	0.00148913		1.30347	0.00151426		1.29152	0.000941154		1.30126	0.00142745		1.29591	0.00123443		1.29896	0.000354848		1.29805	0.00118476
1.30717	0.000687039		1.30339	0.00250305		1.30685	0.00163787		1.30541	0.000418643		1.30082	0.00169215		1.30528	0.00102959		1.30113	0.00247569		1.30344	0.000598371		1.30396	0.00119415		1.30266	0.000858273		1.30972	0.00104976		1.29934	0.000820437		1.30908	0.00154274		1.30185	0.00124148		1.30365	0.000825141		1.30523	0.00138548
1.31498	0.00113714		1.30964	0.00224943		1.31372	0.00128242		1.31073	0.000619252		1.30645	0.00157355		1.30996	0.000855724		1.30613	0.00182491		1.31094	0.00080366		1.30927	0.00115173		1.30955	0.00135717		1.3141	0.000872395		1.30465	0.00142946		1.31439	0.00116291		1.30966	0.00122376		1.30865	0.000555186		1.31054	0.00194283
1.32092	0.00168184		1.31777	0.00280456		1.31841	0.00110227		1.3151	0.00117171		1.31051	0.0023387		1.31465	0.000745004		1.30957	0.00172358		1.31594	0.00163114		1.31709	0.00183366		1.31454	0.00123471		1.31972	0.000630349		1.30903	0.00142924		1.31877	0.000664989		1.31654	0.00132301		1.31584	0.000579192		1.31523	0.00158526
1.32498	0.00071994		1.32402	0.00244756		1.3231	0.00202222		1.32135	0.00127157		1.31707	0.00169611		1.32184	0.00143191		1.31613	0.00109238		1.32032	0.00163282		1.32428	0.00191333		1.31923	0.000944878		1.32785	0.000391243		1.31559	0.00133114		1.32533	0.000663818		1.3206	0.00123422		1.32334	0.000682635		1.32148	0.000820578
1.33155	0.000615525		1.32808	0.00241127		1.33029	0.00263371		1.32948	0.000730726		1.32489	0.00134239		1.32965	0.00126331		1.32395	0.0018377		1.32719	0.00123911		1.32865	0.00107826		1.32641	0.00120145		1.33441	0.000560038		1.32371	0.00106535		1.33314	0.00142792		1.32591	0.00101418		1.32834	0.000722572		1.3293	0.000516783
1.33967	0.000259782		1.33371	0.00247161		1.3381	0.00160978		1.33572	0.000906314		1.33114	0.00102689		1.33465	0.000782495		1.32957	0.00168467		1.33532	0.000995248		1.33365	0.000909843		1.33423	0.000963668		1.33816	0.00186287		1.32934	0.000986613		1.33877	0.00120837		1.33373	0.00141029		1.33303	0.00118326		1.33555	0.000672454
1.3453	0.000904552		1.34183	0.00337974		1.34341	0.00139586		1.33979	0.000850019		1.3352	0.00145784		1.33903	0.00180945		1.33395	0.00138069		1.34063	0.00137189		1.34115	0.00128392		1.33954	0.00121052		1.34316	0.00161642		1.3334	0.000871986		1.34283	0.00102959		1.34091	0.00149502		1.3399	0.000857876		1.33992	0.001043
1.34873	0.0010967		1.34839	0.00278009		1.34779	0.00177373		1.34541	0.000348943		1.34145	0.00147655		1.3459	0.00123721		1.33988	0.00149638		1.34469	0.00124965		1.34865	0.000832492		1.34392	0.000980946		1.35066	0.00086284		1.33996	0.000632946		1.3497	0.00166341		1.34528	0.000843018		1.34772	0.00118675		1.34555	0.00178008
1.35467	0.000826412		1.35277	0.00204603		1.35435	0.00245005		1.35354	0.000315881		1.34957	0.0011173		1.35403	0.000552504		1.3477	0.000958677		1.35157	0.000916632		1.35334	0.00107851		1.35048	0.000718323		1.35754	0.00112645		1.34809	0.00143838		1.35783	0.00162803		1.35029	0.000784114		1.35303	0.00129456		1.35336	0.00143029
1.36217	0.000382932		1.35839	0.00176182		1.36247	0.00257943		1.36041	0.00105219		1.35582	0.000899583		1.35934	0.000541761		1.35426	0.00130679		1.35969	0.000952041		1.35771	0.000985124		1.3586	0.000946822		1.36191	0.000842751		1.35372	0.000344096		1.36346	0.000970069		1.3581	0.000867562		1.3574	0.00144121		1.36023	0.00100644
1.36811	0.000565488		1.36652	0.00283052		1.36779	0.00252703		1.36448	0.000795064		1.35957	0.00109068		1.3634	0.00172789		1.35863	0.00218137		1.36469	0.000959207		1.36521	0.00134963		1.36392	0.00127683		1.36691	0.000474538		1.35746	0.000329523		1.36689	0.00140777		1.3656	0.000389923		1.36428	0.000795898		1.36429	0.000446259
1.37248	0.001558		1.37308	0.00231505		1.37185	0.0018218		1.3701	0.000817403		1.36457	0.000962577		1.37028	0.00130891		1.36394	0.001792		1.36844	0.000967638		1.37303	0.00120838		1.36829	0.000665194		1.3741	0.000575962		1.36309	0.000635556		1.37283	0.000928595		1.36966	0.00098964		1.3724	0.000555623		1.36992	0.000786849
1.37811	0.00135374		1.37683	0.00203422		1.37873	0.00155711		1.37822	0.000710397		1.37239	0.00163918		1.3784	0.00108265		1.37176	0.00148985		1.37469	0.00105384		1.37771	0.00145777		1.37517	0.000836676		1.38191	0.000220732		1.3709	0.000942459		1.38033	0.000977567		1.37373	0.00117297		1.3774	0.000606689		1.37804	0.000902895
1.38592	0.000901125		1.38183	0.00278726		1.38685	0.00188285		1.38479	0.000604284		1.37895	0.00151503		1.38403	0.00058276		1.37863	0.00191553		1.38219	0.00104942		1.38146	0.00139025		1.38329	0.000942934		1.38691	0.00102649		1.37716	0		1.38658	0.00116385		1.38091	0.00121629		1.38084	0.00105189		1.38461	0.000680474
1.39311	0.00101331		1.38933	0.00245304		1.39248	0.00220345		1.38854	0.0016529		1.38332	0.00159753		1.38746	0.000478618		1.38301	0.00211765		1.38813	0.000885227		1.38834	0.000818005		1.38891	0.00115156		1.39128	0.00147604		1.38153	0.000522235		1.39096	0.00131733		1.3881	0.0014628		1.38709	0.000846092		1.38836	0.000999365
1.39748	0.00112115		1.39621	0.00154217		1.39591	0.00184368		1.39323	0.00188367		1.38864	0.00168003		1.3934	0.000140538		1.38832	0.00206882		1.3925	0.00163999		1.39584	0.000866381		1.39236	0.00103235		1.39816	0.00146183		1.38684	0.000903308		1.39658	0.00123555		1.3931	0.000988572		1.3949	0.00104054		1.39335	0.00129184
1.40248	0.00102702		1.40058	0.00123306		1.40185	0.00145204		1.40073	0.00132786		1.39614	0.00174276		1.4009	6.11702e-05		1.39613	0.00154783		1.39844	0.00141763		1.40115	0.00155038		1.39829	0.0011764		1.40628	0.00121023		1.39465	0.000651434		1.40408	0.00169036		1.39748	0.00068039		1.40084	0.00110208		1.40055	0.00135717
1.40998	0.0014577		1.40558	0.00217917		1.40966	0.00150336		1.40791	0.00118735		1.40364	0.001199		1.40684	0.000307385		1.40332	0.00131097		1.40625	0.00121761		1.40553	0.00132661		1.4061	0.00120923		1.4116	0.000897383		1.40184	0.000749095		1.41127	0.00148369		1.40435	0.000514775		1.4049	0.00234427		1.40742	0.00142322
1.4178	0.00084766		1.41277	0.00180676		1.4156	0.00142611		1.41229	0.00100081		1.40832	0.00118108		1.41121	0.000630556		1.40738	0.00219339		1.41313	0.000738532		1.41209	0.00131574		1.41204	0.00109433		1.41566	0.00157501		1.40622	0.000808909		1.41564	0.00154157		1.41248	0.000796919		1.41084	0.0011981		1.41211	0.00112602
1.42248	0.00108528		1.42058	0.00162045		1.41998	0.00172052		1.41697	0.0011525		1.4127	0.00137613		1.41684	0.000667829		1.41176	0.0016314		1.4175	0.00134618		1.4199	0.00140551		1.41642	0.000855466		1.42253	0.00138613		1.4109	0.000348664		1.42064	0.00151954		1.4181	0.000807377		1.41865	0.00112849		1.41679	0.00137133
1.42686	0.000859541		1.42558	0.00120542		1.4256	0.00217347		1.42416	0.00115607		1.41989	0.00167792		1.42465	0.00122691		1.41895	0.00108899		1.42282	0.00120138		1.42584	0.000917863		1.42204	0.00105114		1.43066	0.000488502		1.41871	0.000599667		1.42814	0.000608285		1.42217	0.00123892		1.42522	0.00101195		1.42399	0.00053518
1.43436	0.000653909		1.42995	0.00180887		1.43341	0.00261805		1.43198	0.00144179		1.4277	0.00108936		1.43184	0.000869975		1.42613	0.000489131		1.43063	0.000758344		1.43021	0.00127357		1.42985	0.00113969		1.43597	0.000561263		1.42621	0.000647736		1.43564	0.00204207		1.42873	0.00112666		1.42959	0.00134585		1.4318	0.000263462
1.44217	0.00170058		1.43652	0.00169831		1.4406	0.00170647		1.43729	0.00124811		1.43301	0.000695312		1.43622	0.000343342		1.43113	0.00162905		1.43782	0.000612493		1.43584	0.000417539		1.43704	0.00114465		1.43941	0.00128054		1.43091	8.02602e-05		1.44033	0.0018675		1.43654	0.000735667		1.4349	0.00108069		1.43711	0.00125221
1.44655	0.00184726		1.44464	0.0018074		1.44498	0.00113684		1.44166	0.00123605		1.43707	0.00140328		1.44122	0.000337422		1.43551	0.00158178		1.44219	0.000797969		1.44365	0		1.44142	0.000762598		1.44566	0.000866515		1.43528	0.000710596		1.44502	0.0010877		1.44279	0.00136099		1.4424	0.000201211		1.44148	0.00031606
1.45061	0.00105261		1.45027	0.00158965		1.44998	0.00102421		1.44822	0.00093759		1.44426	0.00211256		1.44903	0.000724614		1.44238	0.000883205		1.44719	0.00119864		1.45053	0.00149554		1.4461	0.00136494		1.45316	0.000703845		1.44278	0.00103968		1.45252	0.000629608		1.44685	0.00150719		1.44959	0.000127012		1.44804	0.000913038
1.45748	0.0011376		1.45433	0.00252331		1.45779	0.00190013		1.45635	0.00139265		1.45239	0.00195757		1.45622	0.000346631		1.45051	0.00185416		1.45469	0.00138981		1.4549	0.00171284		1.45392	0.00112414		1.4591	0.000454939		1.45059	0.000763668		1.46002	0.00115401		1.4531	0.00139728		1.45397	0.000893012		1.45617	0.00170696
1.46467	0.000654367		1.4612	0.00226716		1.46498	0.00204436		1.46197	0.00109821		1.45739	0.000982082		1.4609	0.000948904		1.45582	0.00216988		1.46219	0.00113372		1.46021	0.0017219		1.46142	0.00102781		1.46347	0.000892484		1.45528	0.00105099		1.46439	0.00141925		1.46123	0.000907045		1.45896	0.000827978		1.4618	0.00118806
1.46998	0.00134415		1.46933	0.00186057		1.46966	0.00175833		1.46604	0.000714641		1.46114	0.00152399		1.46559	0.000685149		1.45988	0.0014862		1.46656	0.000709657		1.46834	0.000292329		1.4658	0.00049976		1.4691	0.000571552		1.45903	0.000945939		1.46846	0.00122547		1.46716	0.000686153		1.46678	0.00120138		1.46586	0.000912094
1.47436	0.00171588		1.47496	0.00138034		1.47466	0.00103582		1.4726	0.000999694		1.46739	0.00192252		1.4734	0.000640203		1.46645	0.000908797		1.47063	0.00148718		1.4749	0.000452722		1.47048	3.15319e-05		1.47691	0.000462778		1.4659	0.000721036		1.47533	0.000291021		1.47091	0.000745057		1.47428	0.000997109		1.47273	0.000621271
1.48092	0.0011424		1.47839	0.00104823		1.48216	0.00138425		1.48072	0.00167144		1.4752	0.000899583		1.4809	0.00113921		1.47457	0.00107332		1.47782	0.000830217		1.47865	0.000613374		1.47829	0.000800393		1.48378	0.000538724		1.4734	0.00198606		1.48252	0.00063898		1.47623	0.00087055		1.47865	0.000494517		1.48085	0.00111352
1.48905	0.0012411		1.48433	0.00170316		1.48966	0.00147284		1.48635	0.00108905		1.48082	0.000989462		1.48528	0.000609509		1.48051	0.00163714		1.48532	0.000967848		1.48365	0.00111913		1.48579	0.00101399		1.48816	0.000657787		1.47872	0.00171396		1.48783	0.00179838		1.48373	0.00110211		1.48271	0.000509794		1.48617	0.00103357
1.49498	0.00149906		1.49183	0.00160969		1.49404	0.00144232		1.4901	0.000731396		1.4852	0.000838961		1.48934	0.000963374		1.48457	0.00217432		1.49031	0.0012937		1.49115	0.000993661		1.49016	0.000964748		1.49316	0.000972839		1.48309	0.000721472		1.49252	0.00146073		1.49029	0.000732039		1.4899	0.000673469		1.48961	0.000726939
1.49905	0.000473639		1.49777	0.00175823		1.4981	0.000875654		1.49572	0.000839519		1.49114	0.000448869		1.49622	0.00144945		1.49082	0.00157943		1.49469	0.000992086		1.49803	0.00100504		1.49423	0.000700182		1.50097	0.000812618		1.48965	0.00061163		1.49877	0.00106145		1.49466	0.00110531		1.49709	0.000630477		1.49554	0.000896055
1.50498	0.00175084		1.50214	0.00186626		1.50498	0.00173807		1.50354	0.000473598		1.49895	0.00112046		1.5034	0.000831607		1.49894	0.00112842		1.50157	0.000279479		1.5024	0.00100556		1.5011	0.000793482		1.50816	0.000675181		1.49746	0.000801949		1.50689	0.000904929		1.49998	0.000780486		1.50209	0.000961101		1.50335	0.00123405
1.51311	0.00167499		1.50777	0.00132886		1.51248	0.00100692		1.50948	0.000610763		1.50551	0.00145704		1.50871	0.00099385		1.50488	0.0015951		1.50938	0		1.5074	0.000437459		1.5086	0.000818535		1.51285	0.000950055		1.5034	0.000819567		1.51314	0.00095765		1.50748	0.000628102		1.50646	0.000892575		1.5093	0.00136732
1.51967	0.000391386		1.51558	0.00194328		1.51779	0.00165299		1.51385	0.000755523		1.50989	0.0014125		1.5134	0.00108286		1.50863	0.00207378		1.51532	0.000664763		1.51459	0.0010291		1.5136	4.75137e-06		1.51754	0.000823888		1.50778	0.00101576		1.5172	0.00106918		1.51466	0.0011162		1.51334	0.0010521		1.51367	0.00150553
1.52373	0.000672873		1.52245	0.00246106		1.52216	0.000894561		1.51947	0.000751725		1.5152	0.00104165		1.51965	0.0013589		1.51426	0.00153555		1.51938	0.000767829		1.5224	0.000421679		1.51798	6.09041e-05		1.52535	0.000447099		1.5134	0.00117193		1.52283	0.00132881		1.51966	0.000825731		1.52115	0.00114093		1.51929	0.00194212
1.52936	0.000829382		1.52683	0.0026729		1.52872	0.00137506		1.52697	0.000748374		1.52301	0.000513445		1.52778	0.00129005		1.52176	0.00219365		1.52563	0.00123742		1.5274	0.000274221		1.52454	0.000383567		1.53285	0.000836627		1.52153	0.000716251		1.53096	0.00148088		1.52403	0.000966803		1.52709	0.0012136		1.52679	0.0019492
1.53748	0.00129982		1.53183	0.00230535		1.53685	0.00151686		1.53416	0.00040859		1.52989	0.000924886		1.53372	0.00139529		1.52832	0.00192414		1.53375	0.00110126		1.53177	0.000871555		1.53267	4.83777e-05		1.53691	0.000750882		1.52809	0.000740177		1.53752	0.00158913		1.53123	0.00142011		1.53115	0.00135239		1.53398	0.000734723
1.54405	0.0011344		1.53964	0.00173777		1.54247	0.00151605		1.53885	0.00142638		1.53426	0.001597		1.53778	0.00155863		1.5327	0.00165098		1.53969	0.00144081		1.53865	0.00168878		1.5386	0.000289403		1.54097	0.000924332		1.53247	0.000643386		1.54158	0.00148205		1.53904	0.000627248		1.5374	0.000830597		1.53836	0.000870818
1.5478	0.000895413		1.54683	0.00191184		1.54685	0.00172133		1.54354	0.00103968		1.53957	0.00176859		1.54403	0.00171342		1.53801	0.00121878		1.54375	0.00129433		1.54646	0.000880351		1.54267	0.000602778		1.54816	0.000839322		1.53778	0.000359539		1.54721	0.00149845		1.54404	0.000428339		1.54553	0.000704022		1.54335	0.000587542
1.5528	0.00103935		1.55152	0.00195741		1.55279	0.00223559		1.55135	0.000876603		1.54739	0.00142489		1.55215	0.00109142		1.54551	0.00122218		1.55	0.00066392		1.55209	0.000794981		1.54861	0.000622864		1.55535	0.000910123		1.5459	0.000333874		1.55533	0.00150408		1.54872	0.000538891		1.55147	0.000813793		1.55117	0.00102413
1.5603	0.00109396		1.55621	0.00161201		1.56091	0.00239036		1.55885	0.000484544		1.55457	0.000843178		1.5584	0.00088313		1.5527	0.00127336		1.55813	0.00109684		1.55615	0.00166343		1.55673	0.000505159		1.56066	0.000914287		1.55278	0.000275364		1.56189	0.00140965		1.55591	0.000686366		1.55553	0.00123542		1.55867	0.000978137
1.56717	0.00113874		1.56402	0.0012894		1.56716	0.00219481		1.56354	0.0011315		1.55864	0.00122141		1.56247	0.000920183		1.55738	0.00172776		1.56407	0.00156285		1.56302	0.0012728		1.56298	0.000796074		1.56504	0.000641373		1.55653	0.000756273		1.56564	0.00189702		1.56372	0.00111385		1.56178	0.000992308		1.56305	0.000403803
1.57186	0.000898383		1.57152	0.00160041		1.57154	0.00166083		1.56791	0.00112748		1.56301	0.00146706		1.5684	0.00120389		1.56207	0.00231482		1.56782	0.0015561		1.57115	0.000879575		1.56736	0.00118331		1.5716	0.00034053		1.56122	0.0010647		1.57064	0.00184946		1.56841	0.00164207		1.57022	0.00137793		1.56773	0.000671511
1.57655	0.000975609		1.57589	0.00133941		1.57716	0.00108984		1.57573	0.0009988		1.5702	0.00197497		1.57653	0.000686903		1.56957	0.00156872		1.57313	0.000863939		1.57646	0.00113776		1.57298	0.000693487		1.57972	0.000825113		1.56872	0.000722124		1.57814	0.00124305		1.57216	0.00107864		1.57615	0.000956736		1.57554	0.00127415
1.58373	0.000918489		1.57996	0.00148963		1.58529	0.00114386		1.58323	0.000863199		1.57707	0.00201609		1.58309	0.00065292		1.57707	0.00122505		1.58063	0.0014503		1.58021	0.00098202		1.58111	0.000690679		1.58535	0.000910613		1.57559	0.000935933		1.58502	0.00122852		1.57872	0.00060868		1.57959	0.00112521		1.58304	0.000823644
1.59155	0.000488033		1.58683	0.00110689		1.59154	0.00125865		1.5876	0.000695206		1.58207	0.00136822		1.58653	0.000832922		1.58207	0.00160032		1.58719	0.00178099		1.58615	0.000839477		1.58767	0.00135328		1.58972	0.000849611		1.58028	0.00145708		1.58939	0.0017159		1.58623	0.000420229		1.5849	0.00112958		1.58742	0.00121872
1.59686	0.00105215		1.59433	0.00113748		1.59529	0.00166488		1.59166	0.000623273		1.58676	0.00185531		1.59153	0.000716721		1.58644	0.00162852		1.59188	0.00230623		1.59365	0.0011481		1.59141	0.000953733		1.59566	0.00105466		1.58497	0.000998793		1.59439	0.00138856		1.59185	0.000717953		1.5924	0.00111692		1.59117	0.000909264
1.60123	0.00111727		1.59933	0.00168776		1.60029	0.00178129		1.59854	0.000675547		1.59364	0.00146311		1.59903	0.000902204		1.59363	0.00138983		1.59688	0.00175191		1.59959	0.00034795		1.59642	0.000971443		1.60379	0.00147359		1.59215	0.000373677		1.60158	0.000714665		1.59622	0.00094226		1.59897	0.0015128		1.59804	0.00078567
1.6078	0.000988175		1.60402	0.00145988		1.6081	0.00159249		1.60604	0.000123761		1.60176	0.00233581		1.6059	0.000798939		1.60176	0.00179696		1.60438	0.00150615		1.60396	0.00113698		1.60392	0.000853738		1.61003	0.000807229		1.59997	0.00075649		1.60939	0.000817998		1.60216	0.00117532		1.60365	0.00133057		1.60554	0.00112296
1.61592	0.000253613		1.61058	0.00176562		1.61466	0.00216483		1.61104	0.000270978		1.60739	0.002257		1.61059	0.00100547		1.60645	0.00165255		1.61188	0.0017713		1.60959	0.0011569		1.61048	0.00109498		1.6141	0.000957895		1.60528	0.00118019		1.61439	0.00127913		1.61028	0.00105111		1.60865	0.000806591		1.61086	0.000664199
1.62155	0.00136608		1.61839	0.00170422		1.61935	0.00280117		1.61541	0.00121572		1.61145	0.00148551		1.61559	0.00144572		1.61019	0.00171836		1.61657	0.00119653		1.6174	0.0016104		1.61516	0.00125847		1.62004	0.000483847		1.60965	0.00119259		1.61845	0.00105934		1.61654	0.00128203		1.61615	0.000784986		1.61523	0.00114584
1.62561	0.00136608		1.62402	0.00137633		1.62435	0.00149066		1.62197	0.00110022		1.6177	0.000887458		1.62278	0.000912071		1.61676	0.000833586		1.62125	0.0013485		1.62428	0.0014901		1.62017	0.00102241		1.62816	0.000557833		1.61622	0.0012026		1.62564	0.0012011		1.62091	0.000868415		1.62365	0.000969394		1.62179	0.00118593
1.63248	0.000731821		1.62839	0.000979867		1.63154	0.00141477		1.62979	0.000570105		1.62614	0.000433054		1.63028	0.000807928		1.62426	0.000995237		1.62844	0.00120454		1.62865	0.000756435		1.62736	0.00136278		1.63441	0.000642353		1.62434	0.000816522		1.63345	0.00140332		1.62622	0.000411265		1.62834	0.000962628		1.62961	0.000368895
1.64061	0.00121734		1.63433	0.00115267		1.63904	0.00123839		1.63604	0.000886656		1.63207	0.00144308		1.63528	0.000408459		1.62988	0.00167527		1.63625	0.00126482		1.63365	0.000317941		1.63517	0.00107943		1.63816	0.000588456		1.62965	0.000755185		1.63877	0.00154578		1.63403	0.000506238		1.63303	0.000955427		1.63554	0.000667737
1.64592	0.000396413		1.64246	0.000806217		1.64404	0.00224883		1.6401	0.0010341		1.63583	0.00208251		1.63997	0.00108813		1.63426	0.00200014		1.64125	0.00129222		1.64146	0.000950717		1.64017	0.00119735		1.64316	0.000682776		1.63372	0.00119346		1.64283	0.00189398		1.64122	0.000450535		1.6399	0.0017786		1.63961	0.0011548
1.64936	0.000966927		1.6487	0.000539096		1.64873	0.00209973		1.64604	0.000923739		1.64239	0.0018047		1.64715	0.00102257		1.64051	0.00201607		1.64563	0.00187795		1.64896	0.00113724		1.64454	0.00162994		1.65066	0.000846916		1.64059	0.00102729		1.6497	0.00118751		1.6456	0.00101802		1.64772	0.00134912		1.64554	0.00131377
1.65561	0.00114149		1.65277	0.00107292		1.6556	0.00188798		1.65416	0.00162833		1.65082	0.00152663		1.65497	0.000587803		1.64832	0.00162722		1.65282	0.00137505		1.65365	0.000707541		1.65142	0.00157055		1.65754	0.000379238		1.64872	0.000548771		1.65783	0.00137333		1.6506	0.000861373		1.65303	0.00111605		1.65367	0.00113381
1.66311	0.000423602		1.65839	0.00156623		1.66341	0.00142395		1.66072	0.0010303		1.65645	0.000809967		1.65997	0.00105699		1.65457	0.000948231		1.66063	0.000975014		1.65834	0.000924071		1.65954	0.000917666		1.66191	0.000821193		1.65403	0.00097291		1.66314	0.0019788		1.65872	0.000698105		1.65709	0.000491026		1.66023	0.000616318
1.66905	0.000169989		1.66652	0.00158944		1.66873	0.00262156		1.66479	0.000856944		1.65989	0.00117186		1.66434	0.000593723		1.65894	0.00156585		1.66563	0.00108461		1.66584	0.00135636		1.66485	0.00130555		1.66691	0.00135722		1.65778	0.00122522		1.66658	0.000930001		1.6656	0.000935644		1.66428	0.000382782		1.6643	0.000792274
1.67311	0.000619866		1.67308	0.0013738		1.6731	0.00230528		1.67041	0.00134037		1.66551	0.00140328		1.67153	0.000243804		1.66457	0.00158569		1.66938	0.00117314		1.67334	0.00127823		1.66892	0.00121916		1.67441	0.00152308		1.66372	0.000620983		1.67283	0.00146166		1.66966	0.00117809		1.67209	0.000403077		1.66992	0.000878365
1.67905	0.00128177		1.67683	0.000894625		1.67998	0.00155387		1.67854	0.00134596		1.67332	0.00140644		1.67934	0.000756405		1.67238	0.00178391		1.67594	0.000686262		1.67771	0.00193713		1.67611	0.0017213		1.68191	0.00134669		1.67153	0.000977695		1.68033	0.00169317		1.67403	0.00118236		1.67709	0.00089083		1.67804	0.000482818
1.68686	0.000937681		1.68183	0.00127526		1.6881	0.00112792		1.6851	0.00107297		1.67989	0.000725886		1.68465	0.000829414		1.67926	0.00135092		1.68344	0.00091347		1.68178	0.00193584		1.68423	0.00120081		1.68691	0.000362334		1.67746	0.00082979		1.68627	0.00162217		1.68153	0.000714751		1.68084	0.00155099		1.68461	0.000701702
1.69373	0.0010622		1.68933	0.000746294		1.6931	0.00119194		1.68885	0.00105018		1.68426	0.00131946		1.68809	0.0011653		1.68332	0.00219182		1.68907	0.00122857		1.68865	0.00177415		1.68954	0.000728906		1.69128	0.000487032		1.68184	0.00112147		1.69064	0.0013438		1.68841	0.000464834		1.6874	0.00137007		1.68836	0.00107909
1.69811	0.0014986		1.69621	0.0014468		1.69685	0.00173456		1.69385	0.00111921		1.68957	0.00084265		1.69434	0.000728999		1.68863	0.00161129		1.69344	0.00109747		1.69615	0.00122804		1.69298	0.000668002		1.69816	0.000896648		1.68747	0.00121086		1.69627	0.00113479		1.69341	0.000622126		1.6949	0.00156168		1.69336	0.000927661
1.70311	0.00071994		1.70089	0.00151179		1.7031	0.00187204		1.70135	0.000850019		1.69739	0.00124513		1.70184	0.00130102		1.69676	0.000608999		1.69938	0.00081736		1.70115	0.00125805		1.69923	0.000822638		1.70629	0.000335141		1.69528	0.000472208		1.70408	0.00114299		1.6981	0.000514988		1.70053	0.00132708		1.70086	0.00118027
1.71092	0.00066282		1.70558	0.000985564		1.7106	0.00141909		1.70791	0.00127603		1.70457	0.00124618		1.70778	0.00109427		1.70394	0.00128955		1.7075	0.00108778		1.70584	0.00172552		1.70673	0.000542306		1.7116	0.000491932		1.70215	0.00106013		1.71096	0.00148486		1.70497	0.000296871		1.7049	0.0010329		1.70773	0.00069038
1.71811	0.000568915		1.71308	0.00123581		1.71654	0.00151551		1.7126	0.000859625		1.70926	0.00128308		1.71184	0.00110764		1.70769	0.00151127		1.71407	0.00127409		1.7124	0.00127875		1.71267	0.000406244		1.71566	0.00106985		1.70652	0.00148557		1.71533	0.0016292		1.71278	0.000392057		1.71084	0.00125746		1.71211	0.00118947
1.7228	0.000672416		1.72058	0.00122061		1.72091	0.00126837		1.7176	0.000892911		1.71395	0.00128045		1.71778	0.000823495		1.71238	0.00174473		1.71813	0.000801341		1.72021	0.000402018		1.71735	0.00135998		1.72253	0.00129034		1.71153	0.00109906		1.72033	0.00098366		1.71842	0.000268272		1.71865	0.000875117		1.71711	0.00160436
1.7278	0.00103273		1.72558	0.0014928		1.72685	0.000602316		1.72479	0.0010332		1.72145	0.00111835		1.72559	0.000933557		1.71957	0.00205263		1.72344	0.000714083		1.72615	0.000507049		1.7233	0.00148351		1.73066	0.000803064		1.71934	0.000496569		1.72814	0.000480583		1.72247	0.000785821		1.72521	0.000790224		1.72429	0.00222776
1.7353	0.00128177		1.72995	0.00117019		1.73466	0.00131564		1.73229	0.0012986		1.72895	0.000739329		1.73246	0.000464805		1.72645	0.00180349		1.73125	0.00100199		1.73021	0.000903634		1.73111	0.00107403		1.73566	0.00115829		1.72684	0.000517015		1.73533	0.000959759		1.72904	0.00093415		1.72959	0.000881664		1.73211	0.00172064
1.7428	0.000976523		1.73683	0.00128729		1.74123	0.00176859		1.7376	0.00124297		1.73395	0.00136058		1.73684	0		1.73145	0.00179566		1.73844	0.000963211		1.73615	0.00103247		1.73767	0.000995848		1.73941	0.000883909		1.73121	0.00147296		1.74002	0.00090282		1.73716	0.000858385		1.7349	0.000903924		1.7371	0.000443192
1.74717	0.000745758		1.74496	0.001654		1.7456	0.00167325		1.74197	0.000928877		1.73832	0.00187587		1.74215	0.00051304		1.73613	0.00113077		1.74282	0.00124965		1.74428	0.000447807		1.74204	0.000847259		1.74566	0.000157771		1.73591	0.00120499		1.7447	0.00119595		1.7431	0.0011655		1.74272	0.000775602		1.74117	0.000692031
1.75123	0.000538299		1.75027	0.00191078		1.75091	0.00173321		1.74854	0.000262266		1.74551	0.0012649		1.74997	0.00149176		1.74332	0.00162173		1.74781	0.00132384		1.75084	0.00148286		1.74735	0.000430648		1.75316	8.86849e-05		1.74372	0.000991398		1.75252	0.00128358		1.74716	0.00106754		1.74959	0.00102548		1.74836	0.00094653
1.75811	0.000785285		1.75433	0.0014179		1.75873	0.000736284		1.75666	0.00145743		1.75364	0.000861364		1.75715	0.00141217		1.75113	0.0014324		1.75594	0.00115628		1.7549	0.000824472		1.75516	0.000217268		1.75878	0.000561508		1.75153	0.000179008		1.76002	0.00127398		1.75341	0.000878446		1.75397	0.000895849		1.75617	0.00102743
1.76561	0.00152899		1.7612	0.000923953		1.76591	0		1.76229	0.00143085		1.75832	0.000974438		1.76153	0.00121112		1.75613	0.00202782		1.76282	0.00134028		1.76052	0.000787996		1.76236	0.000427841		1.76316	0.000511286		1.7559	0.000814782		1.76408	0.00149962		1.76185	0.000701519		1.75928	0.000697693		1.76148	0.00147912
1.77061	0.000992288		1.76933	0.00209013		1.77029	0.000849185		1.76635	0.000875709		1.76207	0.000807595		1.76653	0.00121726		1.76051	0.00120285		1.76688	0.000930753		1.76896	0.000832492		1.76673	0.000779876		1.76941	0.00108039		1.75966	0.00082283		1.76814	0.00160741		1.76747	0.000921344		1.76709	0.00154859		1.76586	0.0010338
1.77498	0.00100326		1.77464	0.00185381		1.77529	0.00157196		1.77322	0		1.76864	0.000770167		1.77434	0.0010787		1.76707	0.00160371		1.77156	0.00108293		1.77553	0.00173871		1.77173	0.000866048		1.77722	0.00104976		1.76653	0.000553556		1.77533	0.00131733		1.77091	0.000962962		1.77428	0.00136221		1.77273	0.000640376
1.78155	0.0015804		1.77808	0.00121049		1.7831	0.00150849		1.78135	0.000534361		1.77614	0.000910389		1.78184	0.000887515		1.7752	0.00201502		1.77876	0.00154367		1.77896	0.000804035		1.77954	0.000547489		1.78379	0.00129573		1.77403	0.00107209		1.78252	0.000813312		1.77654	0.00141115		1.77834	0.00126663		1.78086	0.00133665
1.78967	0.00149312		1.78433	0.000970161		1.7906	0.00155441		1.78666	0.000738992		1.78145	0.00151398		1.7859	0.00080442		1.78113	0.00143475		1.78594	0.00127515		1.78396	0.000613892		1.78704	0.000459373		1.78816	0.000926782		1.77934	0.00106622		1.78752	0.00117111		1.78435	0.00074207		1.78272	0.00114682		1.78586	0.000818927
1.79561	0.000368538		1.79183	0.00112377		1.79466	0.00124326		1.7901	0.000472258		1.78582	0.00198789		1.78996	0.00100021		1.7852	0.000499577		1.79094	0.000714505		1.79146	0.0004015		1.79111	0.000975546		1.79347	0.000917717		1.78371	0.00015791		1.7922	0.00110832		1.7906	0.000171165		1.7899	0.00177053		1.78961	0.00100644
1.79967	0.000173645		1.79777	0.00100371		1.79873	0.000994767		1.79635	0.00141499		1.79208	0.000208752		1.79715	0.000503612		1.79176	0.000921855		1.79531	0.000580667		1.79834	0.000996765		1.79516	0.000992824		1.80128	0.000990968		1.79059	0.000952682		1.79877	0.000829714		1.79498	0.000409984		1.79709	0.00174652		1.79586	0.00135033
1.80592	0.000745073		1.80214	0.0010841		1.80591	0.00101313		1.80385	0.00110424		1.8002	0.000111756		1.80434	0.000443757		1.79988	0.000789452		1.80219	0.000781318		1.80271	0.000905445		1.80235	0.000857409		1.80847	0.000569592		1.79841	0.00108275		1.80689	0.000720054		1.80029	0.000816554		1.80178	0.00155099		1.80336	0.00143572
1.81405	0.00108688		1.80808	0.0013048		1.8131	0.00149445		1.80979	0.000845328		1.80645	0.00114866		1.80934	0.000691946		1.80551	0.000859179		1.81031	0.000983445		1.80771	0.000596559		1.80955	0.000570167		1.81285	0.000855736		1.80434	0.0011778		1.81252	0.000330854		1.8081	0.000402088		1.80646	0.00111888		1.80929	0.000914217
1.8203	0.0011881		1.81589	0.000973959		1.81841	0.00170296		1.81385	0.00119896		1.81082	0.000925413		1.81371	0.00095592		1.80926	0.000970428		1.81594	0.000930331		1.81521	0.000226361		1.81486	0.00129627		1.81785	0.000811638		1.8084	0.00131875		1.81689	0.000891105		1.81529	0.000664811		1.81334	0.000912871		1.81367	0.001239
1.82436	0.000961672		1.82246	0.000818666		1.82279	0.00159006		1.81979	0.000993439		1.81645	0.00122932		1.82059	0.00110786		1.81488	0.00175022		1.82	0.00124648		1.82271	0.000541197		1.81923	0.00141872		1.82566	0.000960345		1.81434	0.001302		1.82314	0.000867673		1.81998	0.000538678		1.82147	0.00115227		1.81929	0.00102507
1.8303	0.000377906		1.82683	0.00104865		1.82966	0.00196793		1.8276	0.00128475		1.82426	0.000768586		1.8284	0.00104932		1.82269	0.00241249		1.82625	0.00147559		1.82771	0.000980985		1.82579	0.00167465		1.83285	0.00112424		1.82247	0.00138226		1.83095	0.00114932		1.82466	0.000314798		1.82709	0.000794589		1.82711	0.00103852
1.83842	0.000602045		1.83214	0.00100983		1.83747	0.00132239		1.83448	0.00107811		1.83114	0.00043859		1.83434	0.000882691		1.82894	0.00166326		1.83438	0.00119274		1.83209	0.00169396		1.83391	0.000712924		1.83691	0.000776115		1.82903	0.000760188		1.8372	0.00163857		1.83185	0.000576454		1.83115	0.000408533		1.83398	0.00117249
1.84467	0.00113943		1.83964	0.000916568		1.8431	0.000580978		1.83885	0.00133568		1.8352	0.000629418		1.8384	0.000836869		1.83332	0.0014593		1.84032	0.000922111		1.83896	0.0014839		1.83954	0.000152692		1.84129	0.000547299		1.83309	0.000885037		1.84127	0.00175526		1.83966	0.0012895		1.8374	0.00034961		1.83836	0.000942521
1.84842	0.000239904		1.84683	0.000514409		1.84748	0.00134238		1.84385	0.00122197		1.84051	0.0012388		1.84465	0.000992973		1.83863	0.00178208		1.84438	0.000711554		1.84709	0.00100996		1.84392	0.00116452		1.84847	0.000415251		1.83871	0.00090309		1.84721	0.00156101		1.84435	0.000401234		1.84553	0.000772329		1.84367	0.00100668
1.85342	0.00066282		1.85152	0.00109739		1.85341	0.00246869		1.85166	0.0010198		1.84864	0.00199948		1.85278	0.000758159		1.84644	0.00197507		1.85063	0.00109368		1.8524	0.00162489		1.84985	0.00112241		1.85566	0.000687186		1.84715	0.00128851		1.85533	0.00171801		1.84873	0.000409131		1.85147	0.00127579		1.85117	0.00133076
1.86092	0.00146433		1.85621	0.000830271		1.86154	0.00192822		1.85885	0.00113373		1.85551	0.000986563		1.85903	0.00102411		1.85363	0.0020602		1.85907	0.00117588		1.85646	0.00131186		1.85798	0.00124659		1.86035	0.00105883		1.85372	0.0011678		1.86158	0.00101459		1.85622	0.000471877		1.85553	0.00159441		1.85836	0.00128877
1.86748	0.0020008		1.86402	0.00047432		1.86779	0.00154901		1.86354	0.00108056		1.85926	0.000681869		1.86309	0.00130036		1.85801	0.00196488		1.865	0.00127915		1.86365	0.0011049		1.86423	0.00121916		1.86504	0.0011872		1.85746	0.00121478		1.86533	0.00111019		1.86404	0.000530995		1.86178	0.00175503		1.86304	0.000600515
1.87217	0.00127835		1.87152	0.000791869		1.87185	0.000946419		1.86822	0.000942058		1.86395	0.000831844		1.86903	0.000866248		1.86301	0.00202704		1.86844	0.00108693		1.87146	0.00115069		1.86829	0.0011358		1.87191	0.000476988		1.86246	0.001297		1.87033	0.00113573		1.86872	0.00112025		1.87022	0.00117497		1.86773	0.00064014
1.87717	0.000937453		1.87589	0.00111343		1.8781	0.00110092		1.87604	0.00106157		1.87145	0.00136031		1.87715	0.000604027		1.87051	0.00250624		1.87407	0.000480973		1.87678	0.00147277		1.87423	0.00122931		1.87972	0.000638923		1.87027	0.00115018		1.87783	0.000939608		1.87248	0.00127008		1.87584	0.000466147		1.87555	0.000790151
1.88467	0.000773404		1.87996	0.00109381		1.88622	0.0010288		1.88354	0.00133032		1.87832	0.00142357		1.8834	0.000910974		1.87801	0.00110884		1.88157	0.000751178		1.88053	0.000802224		1.88235	0.00109951		1.88535	0.00122003		1.87684	0.000619896		1.8847	0.00132974		1.87935	0.000805456		1.87959	0.000912435		1.88305	0.00120457
1.89217	0.00122579		1.88714	0.0010284		1.89216	0.000707924		1.88791	0.000866774		1.88332	0.000801533		1.88684	0.00138258		1.88301	0.000813478		1.88782	0.0012448		1.88678	0.000692019		1.8886	0.00102976		1.88941	0.00125457		1.88122	0.000421094		1.88908	0.00128921		1.88685	7.36308e-05		1.88521	0.0010892		1.8871	0.00101092
1.89717	0.000393899		1.89433	0.00123918		1.89591	0.00205787		1.89198	0.000876826		1.88801	0.00136242		1.89246	0.000583857		1.8877	0.00120677		1.89219	0.00106838		1.89428	0.000630966		1.89236	0.00100837		1.89597	0.00129451		1.88621	0.00097552		1.89408	0.000498391		1.89216	0.000423003		1.89271	0.000703585		1.89117	0.000773405
1.90155	0.000438453		1.89933	0.000736166		1.90123	0.00242628		1.89916	0.000796404		1.8952	0.00134213		1.89996	0.000855285		1.89519	0.00137495		1.8975	0.000767407		1.90021	0.000849825		1.89735	0.000967339		1.90379	0.000984599		1.89371	0.000769323		1.90158	0.00126296		1.89654	0.00109208		1.89897	0.00125484		1.89836	0.00145812
1.90873	0.00029908		1.90402	0.00100244		1.90873	0.00223235		1.90635	0.000528106		1.90301	0.0019494		1.90622	0.000720887		1.90269	0.00157473		1.905	0.00109874		1.90459	0.00059242		1.90516	0.000689383		1.91003	0.000978719		1.90152	0.000588575		1.90908	0.00153946		1.90279	0.00164186		1.90334	0.00144711		1.90586	0.00174564
1.91655	0.000382475		1.91058	0.00131894		1.91529	0.00187744		1.91166	0.000356986		1.90832	0.00140512		1.9109	0.00137403		1.90738	0.00180323		1.9125	0.000523338		1.91021	0.00132066		1.91173	0.00105308		1.9141	0.00112596		1.90653	0.000686453		1.91408	0.00146096		1.91091	0.00143462		1.90865	0.000991654		1.91086	0.00141968
1.92155	0.000498543		1.91839	0.00105414		1.91998	0.00131132		1.91604	0.000460641		1.91239	0.00153533		1.9159	0.0015389		1.91113	0.00166482		1.91719	0.00110126		1.91802	0.000601992		1.91642	0.00145457		1.92035	0.00136874		1.91059	0.000650999		1.91845	0.00120977		1.91716	0.000748472		1.91646	0.00133864		1.91523	0.001965
1.92592	0.000685897		1.92433	0.00167046		1.92497	0.00142287		1.9226	0.00120566		1.91926	0.00159806		1.9234	0.000826783		1.91801	0.000603514		1.92188	0.000919161		1.9249	0.000932867		1.92142	0.000826094		1.92847	0.00144615		1.91778	0.000569216		1.92564	0.000984362		1.92123	0.00100202		1.92365	0.000968521		1.9218	0.00180555
1.93311	0.000933797		1.92839	0.00142739		1.93248	0.00180506		1.93041	0.00135132		1.92739	0.000720352		1.9309	0.00114338		1.92551	0.000790758		1.92938	0.00114468		1.92927	0.000569396		1.92892	0.000732146		1.93441	0.00102527		1.92559	0.000750618		1.93346	0.000829011		1.92685	0.000828505		1.92834	0.00101653		1.92992	0.00165908
1.94092	0.000583766		1.93433	0.000673711		1.93998	0.00131726		1.93635	0.00123962		1.93301	0.000611758		1.93559	0.00119709		1.93082	0.00165673		1.93688	0.00154662		1.93427	0.000649333		1.93641	0.000863673		1.93816	0.000665627		1.93091	0.00131527		1.93877	0.00119314		1.93498	0.000755088		1.93303	0.00112259		1.93554	0.00166168
1.94623	0.000388416		1.94246	0.00107313		1.94466	0.00230123		1.94041	0.000964844		1.93707	0.00130892		1.94028	0.00102674		1.9352	0.00224483		1.94188	0.00100473		1.9424	0.000121588		1.94142	0.00119022		1.94347	0.000469148		1.93528	0.000941154		1.94283	0.00172386		1.94185	0.000551483		1.94053	0.00101719		1.93992	0.00211501
1.94998	0.000105558		1.9487	0.00109001		1.94935	0.00201924		1.94666	0.000466449		1.94364	0.00235926		1.94747	0.00151478		1.94176	0.0013376		1.94657	0.00101843		1.94959	0.000186522		1.94579	0.00113364		1.95097	0.000747207		1.94215	0.000884602		1.95002	0.0012243		1.94591	0.000412759		1.94803	0.0010604		1.94586	0.00132462
1.95623	0.000737762		1.95277	0.00108916		1.95654	0.00161032		1.95479	0.000816063		1.95176	0.00207882		1.95528	0.00160292		1.94957	0.0011185		1.95375	0.000542939		1.95396	0.000377959		1.95298	0.00119886		1.95753	0.000977249		1.95028	0.00100445		1.95814	0.000978505		1.95123	0.000339342		1.95303	0.00192788		1.95398	0.00123334
1.96373	0.00100463		1.95871	0.000902431		1.96435	0.00130511		1.96104	0.000797968		1.95739	0.00101028		1.96028	0.00139135		1.95582	0.00087302		1.96157	0.000220464		1.95896	0.000724356		1.96079	0.00119152		1.96191	0.00043926		1.95528	0.00135681		1.96283	0.00129413		1.95935	0.000589046		1.9574	0.00181243		1.96023	0.00110456
1.96936	0.00109785		1.96683	0.000953282		1.96966	0.000866741		1.9651	0.000470024		1.96114	0.000356618		1.96465	0.0018362		1.95988	0.00111171		1.96626	0.000420272		1.96677	0.00172888		1.9658	0.00122737		1.96722	0.00112571		1.95903	0.00111298		1.96658	0.00138129		1.96623	0		1.9649	0.00147089		1.96429	0.0011331
1.97373	0.000784143		1.97308	0.00043402		1.97373	0.00115953		1.97104	0.000288627		1.96707	0.000939119		1.97184	0.00114294		1.96582	0.00143162		1.97001	0.001695		1.97396	0.00108576		1.97048	0.0015226		1.97472	0.000757006		1.96528	0.00130352		1.97314	0.00105185		1.96997	0.000134243		1.9724	0.00169087		1.97055	0.00144492
1.97967	0.000623522		1.97683	0.000924375		1.98091	0.00152956		1.97916	0.000556701		1.97457	0.00166448		1.97997	0.000565221		1.97363	0.00183692		1.97657	0.00229506		1.97802	0.00109947		1.97767	0.00113666		1.98191	0.00106152		1.97278	0.00117824		1.98064	0.00137825		1.97498	0.000568557		1.97709	0.00108288		1.97867	0.00121212
1.98748	0.00161467		1.98183	0.0011531		1.98904	0.00140423		1.98541	0.000535925		1.98082	0.000877179		1.98465	0.000537815		1.9802	0.00153373		1.98438	0.00152048		1.9824	0.00150304		1.98548	0.00116517		1.98691	0.00136041		1.97872	0.000583572		1.98627	0.000962571		1.98216	0.000522885		1.98084	0.000896504		1.98492	0.000286341
1.99405	0.00185046		1.98964	0.000666538		1.99372	0.00146798		1.98916	0.00128341		1.9852	0.00056247		1.9884	0.00112956		1.98457	0.00138383		1.98969	0.00137042		1.98959	0.000501875		1.99048	0.00125458		1.99129	0.00169138		1.98309	0.00101837		1.99064	0.00147971		1.98904	0.000512854		1.9874	0.00105952		1.98867	0.000977193
1.99842	0.00125595		1.9962	0.00131472		1.99747	0.0016538		1.99416	0.00133412		1.99082	0.00146522		1.99497	0.00105568		1.9902	0.00233754		1.99406	0.000953305		1.99677	0.000244211		1.99392	0.00120944		1.99847	0.00124894		1.98871	0.00109406		1.99658	0.00141878		1.99403	0.00039163		1.99522	0.00164788		1.99367	0.000900301
2.00373	0.000583538		2.00089	0.00140798		2.00404	0.00104284		2.00166	0.00142102		1.99832	0.00142173		2.00247	0.000554697		1.99832	0.00144885		2	0.00033196		2.00177	3.88049e-05		2.00048	0.000842291		2.00629	0.00111028		1.99653	0.00117954		2.00439	0.00141996		1.99873	0.000246503		2.00053	0.00167385		2.00117	0.00144397
2.01155	0.000800593		2.00589	0.00123665		2.01154	0.00120139		2.00822	0.00143062		2.00551	0.000879287		2.00809	0.000515232		2.00488	0.00175361		2.00813	0.000776892		2.00615	0.000510671		2.00798	0.000851794		2.0116	0.000686695		2.0034	0.00102903		2.01096	0.00135833		2.0056	0.0011608		2.0049	0.00146064		2.00773	0.00106753
2.01873	0.000952076		2.01339	0.0008174		2.01716	0.00132131		2.01291	0.00139443		2.0102	0.000701374		2.01246	0.000897381		2.00863	0.00118379		2.01469	0.00123805		2.01302	0.0011093		2.01391	0.00123622		2.01597	0.000526475		2.00778	0.000534633		2.01533	0.00147666		2.01341	0.000845793		2.01115	0.0014506		2.0121	0.00163384
2.02311	0.00123905		2.02089	0.000550068		2.02154	0.00110064		2.01791	0.00101354		2.01489	0.00151477		2.0184	0.00107936		2.01363	0.00156559		2.01875	0.00178479		2.02084	0.00126685		2.01829	0.00064878		2.02316	0.000792039		2.01278	0.00132766		2.02064	0.00146354		2.01872	0.000398033		2.01928	0.00102853		2.01711	0.00169163
2.02811	0.00120729		2.02558	0.000701352		2.02748	0.000986664		2.02541	0.000632208		2.02239	0.000893784		2.02653	0.00101687		2.02113	0.00175649		2.02438	0.00112698		2.02646	0.000486612		2.02423	0.00154161		2.03097	0.0011752		2.02059	0.00169851		2.02845	0.000874234		2.0231	0.000220892		2.02553	0.00137509		2.02461	0.00181405
2.03592	0.000978122		2.03027	0		2.0356	0.00197306		2.03291	0.000942281		2.0302	0.000982873		2.03278	0.000569386		2.02801	0.00103702		2.03251	0.00151795		2.03083	0.000857845		2.03235	0.00126387		2.03597	0.000774646		2.02809	0.00113104		2.03564	0.00158843		2.02966	0.000141712		2.02959	0.00221376		2.03242	0.00109348
2.04342	0.000380191		2.03746	0.000473054		2.04216	0.00143151		2.0376	0.000995672		2.03489	0.0010796		2.03715	0.00103836		2.0327	0.00135876		2.03938	0.00133016		2.03709	0.00120631		2.03892	0.000944446		2.03941	0.000912573		2.03247	0.00118215		2.04002	0.00150572		2.03779	0.000488097		2.03522	0.00199618		2.03711	0.00109253
2.04748	0.000294739		2.04527	0.000787227		2.04622	0.0013675		2.04229	0.00156109		2.03926	0.000913025		2.04247	0.0010263		2.03738	0.00108403		2.04344	0.00175591		2.04521	0.000952269		2.04298	0.00139496		2.04597	0.000647253		2.03715	0.00137095		2.04502	0.000594226		2.04341	0.000571758		2.04303	0.0022633		2.04149	0.00151379
2.05155	0.000547438		2.05027	0.00065219		2.05154	0.00138749		2.04916	0.00121639		2.04676	0.000745655		2.05028	0.00127821		2.04457	0.00175727		2.04875	0.00169669		2.05115	0.00126866		2.04829	0.00147574		2.05379	0.000790814		2.04496	0.00128438		2.05283	0.000500265		2.04747	0.00012037		2.0499	0.0019198		2.04867	0.00166191
2.05873	0.000859313		2.05464	0.000497741		2.05966	0.0011363		2.05698	0.00091525		2.05457	0.000576176		2.05747	0.00116289		2.05238	0.00160371		2.05688	0.000339759		2.05521	0.00118484		2.0561	0.00137682		2.0591	0.00102625		2.05246	0.0010299		2.06002	0.000941951		2.05435	0.000332512		2.05397	0.00153135		2.05648	0.000401916
2.06592	0.000901582		2.06183	0.000946319		2.06654	0.00203437		2.06229	0.00101734		2.05895	0.000734321		2.06184	0.000962717		2.05738	0.00195104		2.06376	0.000752654		2.06146	0.000456862		2.06329	0.000942934		2.06347	0.000843487		2.05653	0.00100336		2.06408	0.000919457		2.06248	0.000907472		2.05959	0.00195581		2.06179	0.000607827
2.07092	0.000548123		2.06964	0.0006543		2.07091	0.00240332		2.06666	0.00090341		2.0627	0.00124223		2.06684	0.00116771		2.06176	0.00147157		2.0675	0.00112044		2.06959	0.000870521		2.06766	0.000939479		2.06972	0.000483847		2.06059	0.00126045		2.06845	0.00149517		2.06779	0.000672707		2.06772	0.00216924		2.06585	0.000541077
2.0753	0.00048552		2.07464	0.000421993		2.07623	0.00216375		2.07385	0.00079283		2.06957	0.00158962		2.07496	0.00187413		2.06832	0.0014653		2.07219	0.00136999		2.07552	0.000449359		2.07267	0.00112522		2.07753	0.000926047		2.06778	0.00132853		2.07564	0.00137637		2.07153	0.000549989		2.07459	0.00197261		2.07304	0.00140977
2.08217	0.00127766		2.07839	0.000960878		2.08404	0.00202924		2.08166	0.000996789		2.07708	0.00168662		2.08184	0.000901766		2.07644	0.00136659		2.07969	0.00128274		2.07927	0.000695899		2.08048	0.00127856		2.08379	0.00108627		2.07528	0.00107079		2.08252	0.00121821		2.07748	0.00101674		2.07834	0.0015045		2.08117	0.00114088
2.0903	0.00125481		2.08464	0.000714223		2.09122	0.00215267		2.08697	0.000688057		2.08239	0.00124065		2.0859	0.000805516		2.08207	0.00146635		2.08657	0.00128632		2.0849	0.000688914		2.08767	0.00105178		2.08816	0.00044318		2.07997	0.00107992		2.08752	0.00106028		2.08498	0.000865641		2.08303	0.00134759		2.08617	0.00158243
2.09592	0.00128406		2.09214	0.000565681		2.09529	0.0015382		2.09041	0.000708833		2.08676	0.00154982		2.09059	0.00116179		2.08613	0.0011138		2.09156	0.00129243		2.0924	0.00108834		2.09173	0.000799097		2.09347	0.00134497		2.08465	0.00173527		2.0922	0.00134498		2.09123	0.000892105		2.09053	0.00175111		2.08992	0.00139963
2.09998	0.00134826		2.09777	0.000825418		2.09966	0.00245599		2.09666	0.000675324		2.09332	0.00123854		2.09778	0.00125147		2.09301	0.00100542		2.09625	0.000819467		2.09896	0.00158091		2.09611	0.000993472		2.1016	0.00133591		2.09153	0.000959642		2.09908	0.00179299		2.0956	0.00107117		2.0974	0.00203525		2.09617	0.00102059
2.10623	0.00127263		2.10214	0.000621384		2.10685	0.00213647		2.10416	0.00110179		2.10114	0.00115209		2.10465	0.00115259		2.10113	0.00149952		2.10313	0.000966373		2.10334	0.000782822		2.10361	0.000832573		2.10847	0.000628389		2.09934	0.0011256		2.10689	0.00137614		2.10123	0.00131746		2.10209	0.00149534		2.10399	0.0015086
2.11436	0.00103204		2.10808	0.000740597		2.11404	0.00157845		2.1101	0.000844434		2.10739	0.00101582		2.10965	0.000861205		2.10645	0.00199152		2.11094	0.00124269		2.10865	0.000710645		2.11048	0.00103861		2.11285	0.000443425		2.10528	0.00114953		2.11252	0.00160741		2.10873	0.00141029		2.10678	0.00127558		2.10961	0.0012791
2.12061	0.000681556		2.1162	0.000890405		2.11904	0.00206678		2.11448	0.000880177		2.11145	0.000521616		2.11434	0.000885322		2.10988	0.00176771		2.11657	0.00143765		2.11615	0.00186522		2.11548	0.000868424		2.11816	0.000997093		2.10934	0.000816957		2.11658	0.00156734		2.11591	0.000921771		2.11397	0.00111277		2.11367	0.00112791
2.12467	0.000906151		2.12277	0.000780476		2.12341	0.00221642		2.12041	0.000913463		2.11739	0.00109753		2.12122	0.000476425		2.11613	0.00187557		2.12063	0.000870895		2.12334	0.000725132		2.12017	0.00126992		2.12597	0.000622264		2.11559	0.000547031		2.12314	0.00139535		2.12029	0.000150463		2.12147	0.00189929		2.11961	0.00126448
2.13061	0.00133044		2.12683	0.000257838		2.13029	0.00199115		2.12822	0.00149943		2.12551	0.000480498		2.12903	0.000782276		2.12363	0.0019547		2.12719	0.00135756		2.12833	0.00106273		2.12704	0.00101464		2.13316	0.000913798		2.12372	0.00132571		2.13095	0.00136114		2.12498	0.000100949		2.12678	0.00152916		2.12773	0.00169729
2.13873	0.00151299		2.13214	8.22896e-06		2.13841	0.00115493		2.13479	0.00120097		2.13176	0.000485242		2.13465	0.00130474		2.12957	0.00208945		2.13531	0.00170048		2.13271	0.000621911		2.13486	0.000766269		2.13691	0.000625449		2.12965	0.00147905		2.13689	0.000839321		2.13279	0.000868629		2.13115	0.00173845		2.1343	0.00103168
2.14498	0.00124544		2.13995	0.000335062		2.14404	0.000953982		2.13916	0.000983163		2.13614	0.000865318		2.13872	0.00162813		2.13395	0.00192963		2.14125	0.00102665		2.1399	0.000420385		2.14048	0.000858058		2.14128	0.000869455		2.13372	0.000834575		2.14096	0.00110832		2.14029	0.000700879		2.13772	0.00191304		2.13836	0.000751233
2.14873	0.000529159		2.14683	0.000385913		2.1481	0.00078139		2.14447	0.00105822		2.14176	0.000986563		2.14497	0.000998893		2.13957	0.000903313		2.14532	0.00123616		2.14771	0.00129453		2.14454	0.00107619		2.14878	0.00131998		2.13997	0.000911573		2.1472	0.00101998		2.14497	8.77166e-05		2.14584	0.0013908		2.14367	0.000529283
2.15405	0.00134552		2.15121	0.000707893		2.15466	0.00191661		2.15197	0.000738768		2.14989	0.00112204		2.15309	0.000976529		2.14738	0.000352289		2.15157	0.00120033		2.15271	0.000813607		2.15111	0.00107057		2.15566	0.000598256		2.1484	0.0011517		2.15564	0.00111113		2.14966	0.000184397		2.15147	0.00141263		2.15179	0.00102154
2.16155	0.00156029		2.15652	0.000633622		2.16279	0.00142152		2.15916	0.00088956		2.15645	0.000709281		2.15903	0.00144265		2.15457	0.00164027		2.16	0.00119168		2.15709	0.000776613		2.15923	0.00134615		2.16035	0.000453469		2.15434	0.000560516		2.16158	0.00135693		2.15716	0.000660756		2.15553	0.00173474		2.15867	0.00154634
2.1678	0.00123493		2.16433	0.000374308		2.16873	0.00216672		2.16354	0.0011793		2.1602	0.000513445		2.16309	0.00170487		2.15894	0.00134048		2.16563	0.00101401		2.16427	0.00166369		2.16517	0.000640789		2.16504	0.000736428		2.15809	0.00102837		2.16502	0.00129671		2.16466	0.000296657		2.16209	0.00203808		2.16304	0.000953135
2.17248	0.000965099		2.17152	0.000557031		2.17248	0.00182342		2.16854	0.000475832		2.1652	0.000790463		2.16934	0.0014056		2.16395	0.00138487		2.16907	0.000599636		2.17208	0.00140861		2.16892	0.000926953		2.17222	0.00148853		2.1634	0.00127503		2.17033	0.00116596		2.16904	0.000166896		2.17021	0.00218059		2.16804	0.00120976
2.17748	0.00129411		2.17558	0.000694811		2.17873	0.00220291		2.17635	0.000355645		2.1727	0.000663156		2.17778	0.00160511		2.17176	0.00173481		2.17469	0.00080113		2.17709	0.000877247		2.17517	0.000680096		2.18003	0.00129769		2.1709	0.00104556		2.17814	0.00104692		2.1731	0.000199123		2.17584	0.00222096		2.17617	0.000919878
2.18498	0.00145884		2.17995	0.000363969		2.18716	0.00159951		2.18385	0.000868784		2.17957	0.000985772		2.18372	0.00117078		2.17895	0.00137443		2.1825	0.00119295		2.18084	0.000228948		2.18361	0.000363265		2.18535	0.000885624		2.17746	0.00117389		2.1847	0.000843304		2.17998	0.000324615		2.17928	0.00215658		2.18335	0.000861855
2.19248	0.001152		2.18714	0.000815712		2.1931	0.000932375		2.18791	0.00132786		2.18426	0.00162573		2.18715	0.00105809		2.18363	0.00125482		2.18844	0.00129075		2.1874	0.000623463		2.18954	0.00062308		2.18972	0.000757742		2.18215	0.00122413		2.18877	0.00100943		2.18748	0.000614443		2.1849	0.00116646		2.18742	0.00129019
2.19717	0.000326726		2.19433	0.000746927		2.19654	0.00187204		2.19197	0.00059021		2.18895	0.0012251		2.19278	0.00097916		2.18832	0.000955543		2.19282	0.00110948		2.19521	0.00118769		2.19298	0.00170575		2.19629	0.000546319		2.18715	0.00201934		2.19408	0.00195935		2.19279	0.000477426		2.19272	0.00156735		2.19179	0.00132439
2.20186	0.000866396		2.19902	0.000635732		2.20216	0.00201978		2.19916	0.000251766		2.19614	0.000687668		2.20028	0.00157354		2.19613	0.000964161		2.19844	0.00116808		2.20052	0.00118096		2.19861	0.0010926		2.2041	0.000649458		2.19497	0.00115257		2.20158	0.00139676		2.19716	0.000843232		2.19865	0.00200208		2.19898	0.00171286
2.20905	0		2.20371	0.000712957		2.20966	0.00191175		2.20666	0.000759991		2.20395	0.000775175		2.20653	0.00113154		2.20363	0.000732522		2.20594	0.00135355		2.2049	0.00078722		2.20642	0.000657635		2.21004	0.000555628		2.20247	0.00109928		2.20908	0.0013192		2.20372	0.000637493		2.20303	0.00210508		2.20585	0.00192986
2.21686	0.000220026		2.21058	0.000353208		2.21591	0.00151281		2.21135	0.0010828		2.20895	0.00104639		2.2109	0.00113307		2.20801	0.00133238		2.21313	0.00102433		2.21115	0.000593972		2.21267	0.00049652		2.21441	0.00101498		2.20715	0.00163435		2.21377	0.00167536		2.21153	0.000139151		2.20866	0.00195668		2.21086	0.00186853
2.22217	0.00100371		2.21839	0.000544371		2.22029	0.00177292		2.21604	0.000436961		2.21332	0.000845023		2.21653	0.000837745		2.21207	0.00180506		2.21782	0.000945507		2.21896	0.000944508		2.21704	0.000378383		2.22066	0.000903998		2.21184	0.000920491		2.21846	0.00136161		2.21748	0.00052822		2.21615	0.00147308		2.21554	0.00120905
2.22623	0.00161992		2.22402	0.000534032		2.2256	0.0014253		2.22291	0.000563179		2.2202	0.0019183		2.22403	0.00079565		2.21926	0.0013961		2.22282	0.00142437		2.22552	0.000819557		2.22236	0.000782683		2.22879	0.00145448		2.21903	0.00137573		2.22564	0.00109168		2.22154	0.000650298		2.22334	0.00190191		2.22242	0.00147581
2.23342	0.00145268		2.22808	0.000510611		2.23341	0.00147473		2.23072	0.00105487		2.22832	0.00191936		2.23121	0.00148606		2.22645	0.00153138		2.23032	0.00134175		2.22959	0.000802742		2.23017	0.00147984		2.23472	0.00126413		2.22684	0.00168285		2.23345	0.000613205		2.22747	0.000687647		2.22803	0.00273032		2.23023	0.00144043
2.24155	0.00164186		2.23464	0.00170401		2.2406	0.00186259		2.23635	0.00122532		2.23364	0.00104165		2.2359	0.00101358		2.23176	0.00198812		2.23782	0.00103466		2.2349	0.000458414		2.23736	0.00155716		2.23816	0.0014829		2.23184	0.00145839		2.23846	0.00152774		2.2356	0.000643895		2.23271	0.00259174		2.23586	0.00177819
2.24623	0.00082824		2.24245	0.00103705		2.24529	0.00233715		2.24041	0.00114512		2.23801	0.000966531		2.24059	0.00111553		2.23613	0.00124437		2.24282	0.00111749		2.24302	0.00106403		2.24204	0.00127467		2.24379	0.000929967		2.23622	0.000731477		2.24283	0.00166388		2.24217	0.00113968		2.24053	0.002511		2.23992	0.00167182
2.24998	0.000355743		2.24839	0.000439084		2.24998	0.00235011		2.24666	0.00128787		2.24457	0.000989725		2.24809	0.000818452		2.24301	0.000985314		2.24719	0.00139086		2.2499	0.000360885		2.24673	0.000745536					2.24341	0.00139009					2.24622	0.00049642		2.24803	0.00219216		2.24648	0.000828361
