# Supplementary material for: Binding and sequestration of poison frog alkaloids by a plasma globulin
Source: eLife journal article supplement (doi:10.7554/elife.85096), 2023-12-14
Supplement: fig5-data1 [file OsABG+PTX_R3 analysis_InitialFluorescenceRawData.xlsx]

## Sheet: RawData
NanoTemper Technologies	NanoTemper Technologies
MO.Affinity Analysis v3.0.5	MO.Affinity Analysis v3.0.5
Origin of exported data	Origin of exported data
Project Title:	20230407_BSA+PTX
Comment:
Project File Path:	C:\Users\nanotemper\Desktop\Aurora_MST\20230407_BSA\BSA+PTX analysis.nta3
Analysis-Set Name:	OsABG+PTX
Exported from:	Initial Fluorescence (Raw Data Inspection)
Exported on:	2023-04-11 08:23:44
Sample Information	Sample Information
Merge-Set Name:	OsABG+PTX_R3 (#22)
Run Name:	OsABG+PTX_R3 (#22)
Date of Measurement:	2023-04-11 08:11:00
Capillary Type:	Monolith Premium Capillary
Capillary Position:	1
Ligand:	PTX
Ligand Concentration:	0.001
Target:	OsABG
TargetConcentration:	5e-09
Measurement Settings	Measurement Settings
MST-Power:	Medium
Excitation-Power:	15
Excitation type:	Pico - RED
Thermostat Setpoint:	25
Initial Fluorescence of Cap. Index	Initial Fluorescence of Cap. Index	Initial Fluorescence of Cap. Index
Ligand Concentration	Capillary Index	Initial Fluorescence
3.05176e-08	16	12541.5
6.10352e-08	15	13921.6
1.2207e-07	14	13628.4
2.44141e-07	13	13667.8
4.88281e-07	12	14009.9
9.76563e-07	11	13590.3
1.95313e-06	10	13248.7
3.90625e-06	9	14114.4
7.8125e-06	8	13614.5
1.5625e-05	7	12590.2
3.125e-05	6	12135.7
6.25e-05	5	11554.9
0.000125	4	11483.6
0.00025	3	11204.7
0.0005	2	11012.6
0.001	1	13018.1
