# Supplementary material for: Binding and sequestration of poison frog alkaloids by a plasma globulin
Source: eLife journal article supplement (doi:10.7554/elife.85096), 2023-12-14
Supplement: fig5-data1 [file OsABG+PTX_R3 analysis_MSTTraceRawData.xlsx]

## Sheet: RawData
NanoTemper Technologies	NanoTemper Technologies
MO.Affinity Analysis v3.0.5	MO.Affinity Analysis v3.0.5
Origin of exported data	Origin of exported data
Project Title:	20230407_BSA+PTX
Comment:
Project File Path:	C:\Users\nanotemper\Desktop\Aurora_MST\20230407_BSA\BSA+PTX analysis.nta3
Analysis-Set Name:	OsABG+PTX
Exported from:	MST Traces
Exported on:	2023-04-11 08:22:35
Analysis Settings	Analysis Settings
Type of Analysis:	MST
Evaluation strategy:	On Time
Cold Region Start:	-1
Cold Region End:	0
Hot Region Start:	4
Hot Region End:	5
Sample Information	Sample Information		Sample Information	Sample Information		Sample Information	Sample Information		Sample Information	Sample Information		Sample Information	Sample Information		Sample Information	Sample Information		Sample Information	Sample Information		Sample Information	Sample Information		Sample Information	Sample Information		Sample Information	Sample Information		Sample Information	Sample Information		Sample Information	Sample Information		Sample Information	Sample Information		Sample Information	Sample Information		Sample Information	Sample Information		Sample Information	Sample Information
Merge-Set Name:	OsABG+PTX_R3 (#22)		Merge-Set Name:	OsABG+PTX_R3 (#22)		Merge-Set Name:	OsABG+PTX_R3 (#22)		Merge-Set Name:	OsABG+PTX_R3 (#22)		Merge-Set Name:	OsABG+PTX_R3 (#22)		Merge-Set Name:	OsABG+PTX_R3 (#22)		Merge-Set Name:	OsABG+PTX_R3 (#22)		Merge-Set Name:	OsABG+PTX_R3 (#22)		Merge-Set Name:	OsABG+PTX_R3 (#22)		Merge-Set Name:	OsABG+PTX_R3 (#22)		Merge-Set Name:	OsABG+PTX_R3 (#22)		Merge-Set Name:	OsABG+PTX_R3 (#22)		Merge-Set Name:	OsABG+PTX_R3 (#22)		Merge-Set Name:	OsABG+PTX_R3 (#22)		Merge-Set Name:	OsABG+PTX_R3 (#22)		Merge-Set Name:	OsABG+PTX_R3 (#22)
Run Name:	OsABG+PTX_R3 (#22)		Run Name:	OsABG+PTX_R3 (#22)		Run Name:	OsABG+PTX_R3 (#22)		Run Name:	OsABG+PTX_R3 (#22)		Run Name:	OsABG+PTX_R3 (#22)		Run Name:	OsABG+PTX_R3 (#22)		Run Name:	OsABG+PTX_R3 (#22)		Run Name:	OsABG+PTX_R3 (#22)		Run Name:	OsABG+PTX_R3 (#22)		Run Name:	OsABG+PTX_R3 (#22)		Run Name:	OsABG+PTX_R3 (#22)		Run Name:	OsABG+PTX_R3 (#22)		Run Name:	OsABG+PTX_R3 (#22)		Run Name:	OsABG+PTX_R3 (#22)		Run Name:	OsABG+PTX_R3 (#22)		Run Name:	OsABG+PTX_R3 (#22)
Date of Measurement:	2023-04-11 08:11:00		Date of Measurement:	2023-04-11 08:11:27		Date of Measurement:	2023-04-11 08:11:54		Date of Measurement:	2023-04-11 08:12:20		Date of Measurement:	2023-04-11 08:12:47		Date of Measurement:	2023-04-11 08:13:13		Date of Measurement:	2023-04-11 08:13:40		Date of Measurement:	2023-04-11 08:14:07		Date of Measurement:	2023-04-11 08:14:34		Date of Measurement:	2023-04-11 08:15:00		Date of Measurement:	2023-04-11 08:15:27		Date of Measurement:	2023-04-11 08:15:54		Date of Measurement:	2023-04-11 08:16:21		Date of Measurement:	2023-04-11 08:16:47		Date of Measurement:	2023-04-11 08:17:14		Date of Measurement:	2023-04-11 08:17:40
Capillary Type:	Monolith Premium Capillary		Capillary Type:	Monolith Premium Capillary		Capillary Type:	Monolith Premium Capillary		Capillary Type:	Monolith Premium Capillary		Capillary Type:	Monolith Premium Capillary		Capillary Type:	Monolith Premium Capillary		Capillary Type:	Monolith Premium Capillary		Capillary Type:	Monolith Premium Capillary		Capillary Type:	Monolith Premium Capillary		Capillary Type:	Monolith Premium Capillary		Capillary Type:	Monolith Premium Capillary		Capillary Type:	Monolith Premium Capillary		Capillary Type:	Monolith Premium Capillary		Capillary Type:	Monolith Premium Capillary		Capillary Type:	Monolith Premium Capillary		Capillary Type:	Monolith Premium Capillary
Capillary Position:	1		Capillary Position:	9		Capillary Position:	2		Capillary Position:	10		Capillary Position:	3		Capillary Position:	11		Capillary Position:	4		Capillary Position:	12		Capillary Position:	5		Capillary Position:	13		Capillary Position:	6		Capillary Position:	14		Capillary Position:	7		Capillary Position:	15		Capillary Position:	8		Capillary Position:	16
Ligand:	PTX		Ligand:	PTX		Ligand:	PTX		Ligand:	PTX		Ligand:	PTX		Ligand:	PTX		Ligand:	PTX		Ligand:	PTX		Ligand:	PTX		Ligand:	PTX		Ligand:	PTX		Ligand:	PTX		Ligand:	PTX		Ligand:	PTX		Ligand:	PTX		Ligand:	PTX
Ligand Concentration:	0.001		Ligand Concentration:	3.90625e-06		Ligand Concentration:	0.0005		Ligand Concentration:	1.95313e-06		Ligand Concentration:	0.00025		Ligand Concentration:	9.76563e-07		Ligand Concentration:	0.000125		Ligand Concentration:	4.88281e-07		Ligand Concentration:	6.25e-05		Ligand Concentration:	2.44141e-07		Ligand Concentration:	3.125e-05		Ligand Concentration:	1.2207e-07		Ligand Concentration:	1.5625e-05		Ligand Concentration:	6.10352e-08		Ligand Concentration:	7.8125e-06		Ligand Concentration:	3.05176e-08
Target:	OsABG		Target:	OsABG		Target:	OsABG		Target:	OsABG		Target:	OsABG		Target:	OsABG		Target:	OsABG		Target:	OsABG		Target:	OsABG		Target:	OsABG		Target:	OsABG		Target:	OsABG		Target:	OsABG		Target:	OsABG		Target:	OsABG		Target:	OsABG
TargetConcentration:	5e-09		TargetConcentration:	5e-09		TargetConcentration:	5e-09		TargetConcentration:	5e-09		TargetConcentration:	5e-09		TargetConcentration:	5e-09		TargetConcentration:	5e-09		TargetConcentration:	5e-09		TargetConcentration:	5e-09		TargetConcentration:	5e-09		TargetConcentration:	5e-09		TargetConcentration:	5e-09		TargetConcentration:	5e-09		TargetConcentration:	5e-09		TargetConcentration:	5e-09		TargetConcentration:	5e-09
Measurement Settings	Measurement Settings		Measurement Settings	Measurement Settings		Measurement Settings	Measurement Settings		Measurement Settings	Measurement Settings		Measurement Settings	Measurement Settings		Measurement Settings	Measurement Settings		Measurement Settings	Measurement Settings		Measurement Settings	Measurement Settings		Measurement Settings	Measurement Settings		Measurement Settings	Measurement Settings		Measurement Settings	Measurement Settings		Measurement Settings	Measurement Settings		Measurement Settings	Measurement Settings		Measurement Settings	Measurement Settings		Measurement Settings	Measurement Settings		Measurement Settings	Measurement Settings
MST-Power:	Medium		MST-Power:	Medium		MST-Power:	Medium		MST-Power:	Medium		MST-Power:	Medium		MST-Power:	Medium		MST-Power:	Medium		MST-Power:	Medium		MST-Power:	Medium		MST-Power:	Medium		MST-Power:	Medium		MST-Power:	Medium		MST-Power:	Medium		MST-Power:	Medium		MST-Power:	Medium		MST-Power:	Medium
Excitation-Power:	15		Excitation-Power:	15		Excitation-Power:	15		Excitation-Power:	15		Excitation-Power:	15		Excitation-Power:	15		Excitation-Power:	15		Excitation-Power:	15		Excitation-Power:	15		Excitation-Power:	15		Excitation-Power:	15		Excitation-Power:	15		Excitation-Power:	15		Excitation-Power:	15		Excitation-Power:	15		Excitation-Power:	15
Excitation type:	Pico - RED		Excitation type:	Pico - RED		Excitation type:	Pico - RED		Excitation type:	Pico - RED		Excitation type:	Pico - RED		Excitation type:	Pico - RED		Excitation type:	Pico - RED		Excitation type:	Pico - RED		Excitation type:	Pico - RED		Excitation type:	Pico - RED		Excitation type:	Pico - RED		Excitation type:	Pico - RED		Excitation type:	Pico - RED		Excitation type:	Pico - RED		Excitation type:	Pico - RED		Excitation type:	Pico - RED
Thermostat Setpoint:	25		Thermostat Setpoint:	25		Thermostat Setpoint:	25		Thermostat Setpoint:	25		Thermostat Setpoint:	25		Thermostat Setpoint:	25		Thermostat Setpoint:	25		Thermostat Setpoint:	25		Thermostat Setpoint:	25		Thermostat Setpoint:	25		Thermostat Setpoint:	25		Thermostat Setpoint:	25		Thermostat Setpoint:	25		Thermostat Setpoint:	25		Thermostat Setpoint:	25		Thermostat Setpoint:	25
Included	Included		Included	Included		Included	Included		Included	Included		Included	Included		Included	Included		Included	Included		Included	Included		Included	Included		Included	Included		Included	Included		Included	Included		Included	Included		Included	Included		Included	Included		Included	Included
Time [s]	Normalized Fluorescence [-]		Time [s]	Normalized Fluorescence [-]		Time [s]	Normalized Fluorescence [-]		Time [s]	Normalized Fluorescence [-]		Time [s]	Normalized Fluorescence [-]		Time [s]	Normalized Fluorescence [-]		Time [s]	Normalized Fluorescence [-]		Time [s]	Normalized Fluorescence [-]		Time [s]	Normalized Fluorescence [-]		Time [s]	Normalized Fluorescence [-]		Time [s]	Normalized Fluorescence [-]		Time [s]	Normalized Fluorescence [-]		Time [s]	Normalized Fluorescence [-]		Time [s]	Normalized Fluorescence [-]		Time [s]	Normalized Fluorescence [-]		Time [s]	Normalized Fluorescence [-]
-2.9501	0.999434		-2.9502	1.00042		-2.9502	0.997509		-2.9502	1.00052		-2.9501	1.00112		-2.9502	1.00187		-2.9502	1.00042		-2.9502	1.00338		-2.9502	0.999632		-2.9502	0.999216		-2.9502	1.00031		-2.9502	0.999147		-2.9502	0.998359		-2.9501	1.00076		-2.9502	0.999014		-2.9502	1.00208
-2.9001	1.00078		-2.9002	1.00016		-2.9002	1.0002		-2.9002	0.997896		-2.9001	0.997529		-2.9002	1.00013		-2.9002	1.00067		-2.9002	0.99834		-2.9002	0.995973		-2.9002	1.00084		-2.9002	0.999807		-2.9002	1.00099		-2.9002	0.999513		-2.9001	0.998982		-2.9002	0.998679		-2.9002	0.999948
-2.8501	1.00112		-2.8502	1.00061		-2.8502	1.00049		-2.8502	0.997801		-2.8501	1.0002		-2.8502	0.998584		-2.8502	1.00169		-2.8502	1.0025		-2.8502	1.00165		-2.8502	1.00268		-2.8502	1.00172		-2.8502	1.00111		-2.8502	1.00073		-2.8501	1.00033		-2.8501	0.999409		-2.8502	0.998644
-2.8001	1.0022		-2.8002	1.00054		-2.8002	1.00148		-2.8002	0.998307		-2.8001	0.997706		-2.8002	1.00298		-2.8002	1.00062		-2.8002	1.00163		-2.8002	1.00165		-2.8001	0.999203		-2.8002	1.0017		-2.8002	0.998755		-2.8002	1.00045		-2.8001	1.00008		-2.8001	0.99895		-2.8002	0.997264
-2.7501	0.99954		-2.7502	1.00012		-2.7502	0.999641		-2.7502	1.00141		-2.7501	1.00052		-2.7502	1.00011		-2.7502	1.00226		-2.7502	1.00118		-2.7502	0.999605		-2.7501	0.997517		-2.7502	0.999717		-2.7502	1.00214		-2.7502	1.00167		-2.7501	1.00055		-2.7501	0.997666		-2.7502	0.997953
-2.7001	1.00049		-2.7002	0.997973		-2.7002	0.999912		-2.7002	0.999086		-2.7001	0.999311		-2.7002	1.00176		-2.7002	0.998431		-2.7002	0.997989		-2.7002	1.00034		-2.7001	1.00219		-2.7001	0.998236		-2.7002	0.9996		-2.7002	0.999031		-2.7001	1.00157		-2.7001	0.999932		-2.7002	1.00171
-2.6501	1.00099		-2.6502	1.00032		-2.6502	0.999647		-2.6502	1.00041		-2.6501	0.999632		-2.6501	0.998636		-2.6502	1.00029		-2.6502	0.997297		-2.6502	0.998192		-2.6501	0.997747		-2.6501	1.00258		-2.6502	0.998304		-2.6502	0.997993		-2.6501	0.999842		-2.6501	0.999841		-2.6502	1.00189
-2.6001	0.99634		-2.6002	1.00117		-2.6002	1.00268		-2.6002	1.00157		-2.6001	0.999806		-2.6001	0.999408		-2.6002	0.999393		-2.6002	1.00283		-2.6002	0.997611		-2.6001	1.00069		-2.6001	1.00091		-2.6002	1.00018		-2.6002	1.00002		-2.6001	1.00141		-2.6001	1.00244		-2.6002	1.0009
-2.5501	1.00011		-2.5501	0.99918		-2.5502	0.999539		-2.5502	1.00042		-2.5501	1.00013		-2.5501	0.999222		-2.5501	0.999142		-2.5502	1.00121		-2.5502	1.00135		-2.5501	0.999657		-2.5501	0.997066		-2.5502	0.998007		-2.5502	0.999221		-2.5501	1.00024		-2.5501	0.999208		-2.5502	0.997307
-2.5001	1.00232		-2.5001	1.00074		-2.5002	1.00003		-2.5002	1.00046		-2.5001	0.997859		-2.5001	0.999727		-2.5001	1.00208		-2.5002	1.00449		-2.5002	0.996753		-2.5001	1.00187		-2.5001	0.998087		-2.5002	1.00491		-2.5002	1.00106		-2.5001	0.999248		-2.5001	0.998734		-2.5002	0.998359
-2.4501	0.999407		-2.4501	0.997463		-2.4501	1.00053		-2.4502	0.997664		-2.4501	1.00039		-2.4501	0.999647		-2.4501	0.997964		-2.4502	0.99829		-2.4502	0.998911		-2.4501	0.99887		-2.4501	1.0004		-2.4502	1.00028		-2.4502	0.999262		-2.4501	1.00017		-2.4501	1.00438		-2.4502	1.00121
-2.4001	1.00071		-2.4001	0.998611		-2.4001	0.998787		-2.4002	1.00032		-2.4001	1.00104		-2.4001	1.00098		-2.4001	0.998309		-2.4002	0.998311		-2.4002	1.00176		-2.4001	1.00209		-2.4001	0.99924		-2.4002	0.998847		-2.4002	0.999238		-2.4001	0.999438		-2.4001	1.00007		-2.4002	1.00197
-2.3501	0.998116		-2.3501	0.999834		-2.3501	1.00047		-2.3502	0.999849		-2.3501	1.00103		-2.3501	1.0002		-2.3501	1.00243		-2.3502	0.997508		-2.3502	0.999406		-2.3501	1.001		-2.3501	0.997648		-2.3502	0.998993		-2.3502	1.0013		-2.3501	0.997484		-2.3501	1.00028		-2.3502	1.00124
-2.3001	0.999877		-2.3001	1.0031		-2.3001	0.999002		-2.3002	0.998163		-2.3001	1.00081		-2.3001	0.999566		-2.3001	0.999295		-2.3002	0.998319		-2.3002	1.0028		-2.3001	0.998198		-2.3001	1.00103		-2.3002	1.00228		-2.3002	1.00026		-2.3001	0.997948		-2.3001	1.00345		-2.3002	0.999538
-2.2501	0.999533		-2.2501	1.00084		-2.2501	0.998696		-2.2502	1.00092		-2.2501	0.997432		-2.2501	1.00016		-2.2501	1.00111		-2.2502	0.996885		-2.2502	0.99499		-2.2501	1.00014		-2.2501	1.00109		-2.2502	0.998993		-2.2502	0.99902		-2.2501	1.0023		-2.2501	1.00039		-2.2502	0.999075
-2.2001	0.99741		-2.2001	0.999581		-2.2001	0.999706		-2.2002	0.998358		-2.2001	0.999578		-2.2001	0.998643		-2.2001	0.99991		-2.2002	0.999473		-2.2002	1.00058		-2.2001	0.997956		-2.2001	0.999656		-2.2002	0.999564		-2.2002	0.998804		-2.2001	0.995739		-2.2001	0.996225		-2.2002	0.998835
-2.1501	1.00077		-2.1501	0.998592		-2.1501	0.998217		-2.1502	0.998038		-2.1501	0.997332		-2.1501	1.00229		-2.1501	0.999351		-2.1502	1.00128		-2.1502	1.00181		-2.1501	1.00119		-2.1501	1.00169		-2.1502	0.998588		-2.1502	1.00234		-2.1501	1.0021		-2.1501	1.00232		-2.1502	1.00075
-2.1001	1.00272		-2.1001	1.00022		-2.1001	0.999668		-2.1002	1.00011		-2.1001	0.99758		-2.1001	0.999289		-2.1001	0.999135		-2.1002	0.997123		-2.1002	0.998721		-2.1001	0.998428		-2.1001	0.999152		-2.1002	1.00075		-2.1002	0.996695		-2.1001	0.997716		-2.1001	1.00104		-2.1001	1.00159
-2.0501	0.997542		-2.0501	1.00126		-2.0501	0.999391		-2.0502	1.00073		-2.0501	0.999699		-2.0501	0.997577		-2.0501	0.997452		-2.0502	0.998638		-2.0502	0.998559		-2.0501	1.00101		-2.0501	0.999308		-2.0502	0.997463		-2.0502	0.9989		-2.0501	0.998024		-2.0501	0.998159		-2.0501	0.997438
-2.0001	1.00108		-2.0001	0.99873		-2.0001	1.00141		-2.0002	1.0003		-2.0001	1.00211		-2.0001	0.997764		-2.0001	0.997937		-2.0002	0.999503		-2.0002	0.999083		-2.0001	1.00303		-2.0001	0.999122		-2.0002	0.998622		-2.0002	0.998713		-2.0001	0.99862		-2.0001	0.99859		-2.0001	0.996723
-1.9501	1.00015		-1.9501	0.99832		-1.9501	1.0003		-1.9502	0.999534		-1.9501	0.998944		-1.9501	0.997164		-1.9501	0.998761		-1.9502	1.00124		-1.9502	0.999733		-1.9501	0.996232		-1.9501	1.00088		-1.9501	0.998844		-1.9502	0.998071		-1.9501	1.00051		-1.9501	1.00111		-1.9501	1.00073
-1.9001	0.998953		-1.9001	1.00004		-1.9001	1.00023		-1.9002	0.996581		-1.9001	0.998475		-1.9001	1.0011		-1.9001	0.997806		-1.9002	0.99949		-1.9002	0.999566		-1.9001	1.00016		-1.9001	1.00006		-1.9001	1.00228		-1.9002	0.997679		-1.9001	0.999868		-1.9001	0.997528		-1.9001	1.00129
-1.8501	0.999501		-1.8501	0.999002		-1.8501	0.998773		-1.8502	1.00113		-1.8501	1.00018		-1.8501	1.00163		-1.8501	0.99769		-1.8501	1.00181		-1.8502	0.999692		-1.8501	1.00091		-1.8501	0.998598		-1.8501	0.999423		-1.8501	0.999809		-1.8501	0.999648		-1.8501	0.996548		-1.8501	1.0022
-1.8001	1.00108		-1.8001	0.99986		-1.8001	0.996951		-1.8002	0.999402		-1.8001	0.997053		-1.8001	1.00024		-1.8001	0.994866		-1.8001	0.997604		-1.8002	0.999517		-1.8001	0.997556		-1.8001	1.00032		-1.8001	1.00087		-1.8001	0.999905		-1.8001	1.00004		-1.8001	1.00147		-1.8001	1.00131
-1.7501	0.998162		-1.7501	1.00277		-1.7501	1.00273		-1.7502	1.00103		-1.7501	1.00056		-1.7501	0.999068		-1.7501	0.998988		-1.7501	1.00134		-1.7501	1.00135		-1.7501	0.996738		-1.7501	0.997391		-1.7501	1.00247		-1.7501	0.999958		-1.7501	0.999377		-1.7501	0.997222		-1.7501	0.999135
-1.7001	1.00133		-1.7001	1.0011		-1.7001	0.997602		-1.7001	1.00087		-1.7001	0.999057		-1.7001	0.997714		-1.7001	0.999419		-1.7001	0.998027		-1.7001	1.00258		-1.7001	0.999881		-1.7001	0.998879		-1.7001	0.995594		-1.7001	1.00175		-1.7001	1.00066		-1.7001	0.998071		-1.7001	0.996505
-1.6501	0.997763		-1.6501	0.995737		-1.6501	1.00152		-1.6501	1.00111		-1.6501	0.997629		-1.6501	0.996554		-1.6501	1.00014		-1.6501	1.0008		-1.6501	0.999376		-1.6501	0.997985		-1.6501	0.997947		-1.6501	0.996775		-1.6501	0.9999		-1.6501	0.998838		-1.6501	0.99888		-1.6501	1.00016
-1.6001	0.998659		-1.6001	0.998622		-1.6001	1.00176		-1.6001	0.997833		-1.6001	1.00212		-1.6001	0.998731		-1.6001	0.997149		-1.6001	0.998843		-1.6001	1.0017		-1.6001	0.999609		-1.6001	1.00049		-1.6001	1.0015		-1.6001	1.00062		-1.6001	1.00163		-1.6001	1.00117		-1.6001	1.00042
-1.5501	0.998976		-1.5501	0.999966		-1.5501	1.00102		-1.5501	1.00089		-1.55	1.00093		-1.5501	1.00045		-1.5501	0.998764		-1.5501	1.00023		-1.5501	0.998262		-1.5501	0.998825		-1.5501	1.00183		-1.5501	0.998946		-1.5501	0.997811		-1.5501	1.00015		-1.5501	1.0016		-1.5501	0.999236
-1.5	0.999502		-1.5001	0.999878		-1.5001	0.999445		-1.5001	0.999578		-1.5	0.999712		-1.5001	0.998419		-1.5001	0.996923		-1.5001	0.998685		-1.5001	1.00002		-1.5001	1.00058		-1.5001	0.997792		-1.5001	0.999675		-1.5001	0.999172		-1.5001	1.00068		-1.5001	0.999444		-1.5001	0.999663
-1.45	0.998954		-1.4501	1.00109		-1.4501	0.998832		-1.4501	0.997546		-1.45	0.99771		-1.4501	0.999583		-1.4501	1.00008		-1.4501	1.00017		-1.4501	1.00528		-1.4501	0.998514		-1.4501	0.999271		-1.4501	1.00106		-1.4501	0.998862		-1.4501	0.997342		-1.4501	1.00066		-1.4501	0.998312
-1.4	1.00127		-1.4001	1.00003		-1.4001	0.998877		-1.4001	0.996912		-1.4	0.999213		-1.4001	1.0001		-1.4001	0.99907		-1.4001	1.00038		-1.4001	0.999802		-1.4001	0.997643		-1.4001	0.998352		-1.4001	0.997732		-1.4001	1.00048		-1.4001	0.99733		-1.4001	1.00065		-1.4001	0.999874
-1.35	0.999756		-1.3501	0.999504		-1.3501	1.0014		-1.3501	1.00179		-1.35	0.998317		-1.3501	0.999139		-1.3501	0.998678		-1.3501	0.999657		-1.3501	0.998819		-1.3501	0.998953		-1.3501	0.99895		-1.3501	0.999783		-1.3501	0.995734		-1.3501	0.996509		-1.3501	1.00302		-1.3501	0.996584
-1.3	1.00011		-1.3001	1.0001		-1.3001	0.999807		-1.3001	0.995019		-1.3	1.00123		-1.3001	1.0013		-1.3001	0.999379		-1.3001	0.999455		-1.3001	0.996155		-1.3001	1.00006		-1.3001	1.00207		-1.3001	0.999816		-1.3001	0.999527		-1.3001	1.00064		-1.3001	0.997631		-1.3001	0.996051
-1.25	1.00029		-1.2501	0.999059		-1.2501	0.99816		-1.2501	0.996123		-1.25	0.999106		-1.2501	1.00039		-1.2501	0.999191		-1.2501	0.998646		-1.2501	0.996763		-1.2501	0.999268		-1.2501	0.999752		-1.2501	0.999641		-1.2501	0.997925		-1.2501	0.997493		-1.2501	0.999837		-1.2501	0.998382
-1.2	0.999865		-1.2001	0.998085		-1.2001	0.999741		-1.2001	1.00082		-1.2	0.999382		-1.2001	0.999291		-1.2001	0.997451		-1.2001	1.00288		-1.2001	0.998767		-1.2001	1.00009		-1.2001	1.00095		-1.2001	0.999484		-1.2001	0.999888		-1.2001	0.996638		-1.2001	1.00232		-1.2001	0.99902
-1.15	0.998027		-1.1501	0.999309		-1.1501	0.998876		-1.1501	0.996804		-1.15	0.999054		-1.1501	1.00127		-1.1501	1.00136		-1.1501	1.0004		-1.1501	0.998405		-1.1501	1.0035		-1.1501	0.99992		-1.1501	1.00102		-1.1501	0.999412		-1.1501	0.999988		-1.1501	0.999758		-1.1501	1.00134
-1.1	0.999894		-1.1001	0.999259		-1.1001	1.00303		-1.1001	0.997715		-1.1	0.998876		-1.1001	0.999318		-1.1001	0.997807		-1.1001	1.00102		-1.1001	0.997526		-1.1001	0.999655		-1.1001	0.999534		-1.1001	1.00124		-1.1001	0.995165		-1.1	0.999981		-1.1001	1.0007		-1.1001	0.998186
-1.05	0.998305		-1.0501	0.997337		-1.0501	0.999222		-1.0501	0.996843		-1.05	0.995895		-1.0501	0.996076		-1.0501	1.00001		-1.0501	0.99854		-1.0501	1.00095		-1.0501	1.00115		-1.0501	0.997762		-1.0501	0.999872		-1.0501	1.00183		-1.05	0.999295		-1.0501	0.9987		-1.0501	0.999096
-1	1.00041		-1.0001	0.998862		-1.0001	0.99794		-1.0001	0.998072		-1	0.998382		-1.0001	1.00024		-1.0001	0.998411		-1.0001	0.999499		-1.0001	0.999046		-1.0001	1.00005		-1.0001	1.00054		-1.0001	1.00002		-1.0001	0.998275		-1	0.996109		-1	1.00127		-1.0001	0.998035
-0.95	0.995657		-0.9501	0.999494		-0.9501	0.997671		-0.9501	0.997654		-0.95	0.99696		-0.9501	0.998758		-0.9501	0.999721		-0.9501	0.997131		-0.9501	0.997018		-0.95	0.998562		-0.9501	0.999984		-0.9501	0.997951		-0.9501	1.00204		-0.95	0.998042		-0.95	0.99726		-0.9501	0.9964
-0.9	1.00042		-0.9001	0.997464		-0.9001	0.998666		-0.9001	0.999181		-0.9	0.998973		-0.9001	0.998135		-0.9001	0.998176		-0.9001	1.00096		-0.9001	1.00005		-0.9	0.999872		-0.9001	1.00143		-0.9001	0.998429		-0.9001	0.999588		-0.9	0.99634		-0.9	0.998565		-0.9001	1.00128
-0.85	1.00015		-0.8501	1.00091		-0.8501	1.00036		-0.8501	0.997776		-0.85	0.999188		-0.85	0.997936		-0.8501	0.999367		-0.8501	0.998856		-0.8501	0.999363		-0.85	0.999336		-0.85	0.99801		-0.8501	1.00117		-0.8501	0.999115		-0.85	0.996481		-0.85	0.996994		-0.8501	0.999309
-0.8	1.0019		-0.8001	0.999173		-0.8001	0.99855		-0.8001	0.998474		-0.8	0.995447		-0.8	0.999808		-0.8001	0.997253		-0.8001	0.998192		-0.8001	0.999469		-0.8	1.00087		-0.8	0.997456		-0.8001	1.00089		-0.8001	0.99568		-0.8	0.997471		-0.8	0.999186		-0.8001	0.997293
-0.75	0.998144		-0.75	0.999239		-0.7501	0.999959		-0.7501	0.99701		-0.75	0.998573		-0.75	0.999678		-0.75	1.00108		-0.7501	1.00031		-0.7501	1.00059		-0.75	1.00079		-0.75	0.998893		-0.7501	1.00055		-0.7501	0.998159		-0.75	1.00073		-0.75	1.00069		-0.7501	0.998503
-0.7	1.00029		-0.7	0.998325		-0.7001	0.997227		-0.7001	1.00006		-0.7	1.00002		-0.7	1.00063		-0.7	0.997056		-0.7001	1.00162		-0.7001	1.00181		-0.7	0.99911		-0.7	1.00038		-0.7001	0.996769		-0.7001	0.999743		-0.7	0.998045		-0.7	0.999721		-0.7001	0.998656
-0.65	1.00302		-0.65	0.999035		-0.6501	0.998641		-0.6501	0.998869		-0.65	0.993806		-0.65	1.00007		-0.65	0.998286		-0.6501	1.00117		-0.6501	0.998381		-0.65	0.998936		-0.65	1.00063		-0.6501	1.00156		-0.6501	0.996484		-0.65	0.99805		-0.65	0.998929		-0.6501	0.999103
-0.6	0.997828		-0.6	1.00156		-0.6	0.999031		-0.6001	0.998892		-0.6	0.998704		-0.6	0.996929		-0.6	0.999408		-0.6001	1.00116		-0.6001	1.00143		-0.6	1.00038		-0.6	1.00011		-0.6001	0.997426		-0.6001	0.998058		-0.6	1.00184		-0.6	0.999618		-0.6001	1.00146
-0.55	0.997848		-0.55	0.997612		-0.55	0.999532		-0.5501	0.998135		-0.55	0.997928		-0.55	1.00141		-0.55	1.00087		-0.5501	1.00089		-0.5501	0.996775		-0.55	0.999484		-0.55	0.999537		-0.5501	1.00015		-0.5501	0.999293		-0.55	0.997886		-0.55	0.998307		-0.5501	1.00108
-0.5	0.999919		-0.5	1.00096		-0.5	0.999162		-0.5001	0.998254		-0.5	1.00075		-0.5	0.997464		-0.5	0.999098		-0.5001	0.998626		-0.5001	0.997416		-0.5	0.998979		-0.5	1.00173		-0.5001	0.999602		-0.5001	0.996809		-0.5	0.996398		-0.5	0.998418		-0.5001	1.00095
-0.45	1.00096		-0.45	1.00189		-0.45	0.998984		-0.4501	1.0013		-0.45	1.0008		-0.45	0.99794		-0.45	0.998572		-0.4501	1.00269		-0.4501	0.997556		-0.45	1.00157		-0.45	1.00007		-0.4501	0.998426		-0.4501	1.00251		-0.45	0.999241		-0.45	0.999268		-0.4501	0.99599
-0.4	0.998776		-0.4	0.998552		-0.4	1.00173		-0.4001	0.996982		-0.4	0.996401		-0.4	1.00171		-0.4	1.00229		-0.4001	0.998318		-0.4001	0.997453		-0.4	1.00009		-0.4	1.00052		-0.4001	0.997822		-0.4001	0.997435		-0.4	0.998975		-0.4	0.997593		-0.4001	0.998583
-0.35	1.00204		-0.35	0.999984		-0.35	1.00208		-0.3501	0.997159		-0.35	0.999509		-0.35	0.998148		-0.35	0.997761		-0.3501	0.99849		-0.3501	1.00183		-0.35	0.999331		-0.35	0.99737		-0.3501	1.00024		-0.3501	0.999716		-0.35	0.999208		-0.35	1.00128		-0.3501	0.995622
-0.3	0.997174		-0.3	0.998823		-0.3	1.00115		-0.3001	0.995303		-0.3	0.998618		-0.3	1.00112		-0.3	0.996629		-0.3001	0.999902		-0.3001	0.997635		-0.3	1.00199		-0.3	0.999172		-0.3001	0.999171		-0.3001	0.999605		-0.3	0.994256		-0.3	1.00089		-0.3001	0.999697
-0.25	1.00083		-0.25	0.997622		-0.25	1.00104		-0.2501	1.00033		-0.25	0.997782		-0.25	0.999842		-0.25	0.996902		-0.2501	1.0025		-0.2501	0.996175		-0.25	1.00038		-0.25	0.997798		-0.2501	0.998897		-0.2501	1.00013		-0.25	0.999015		-0.25	1.00041		-0.25	0.998606
-0.2	0.999433		-0.2	0.997842		-0.2	0.998566		-0.2001	0.999859		-0.2	0.994834		-0.2	0.998846		-0.2	0.997775		-0.2001	0.998021		-0.2001	1.0005		-0.2	0.999281		-0.2	0.99934		-0.2001	0.999874		-0.2001	0.996244		-0.2	1.00008		-0.2	1.00067		-0.2	0.999838
-0.15	1.00088		-0.15	1.00095		-0.15	0.997656		-0.1501	0.99673		-0.15	0.994842		-0.15	0.99971		-0.15	0.996661		-0.1501	1.00088		-0.1501	0.996773		-0.15	0.999194		-0.15	1.00084		-0.15	1.00138		-0.1501	0.998043		-0.15	0.99674		-0.15	0.998454		-0.15	1.00003
-0.0999999	0.999589		-0.0999999	0.997657		-0.0999999	1.00026		-0.1001	0.996228		-0.0999999	0.997897		-0.0999999	1.00068		-0.0999999	0.99911		-0.1001	0.99882		-0.1001	0.996807		-0.0999999	0.99832		-0.0999999	0.998982		-0.0999999	1.00019		-0.1001	0.996731		-0.0999999	0.999195		-0.0999999	0.998239		-0.0999999	1.0004
-0.05	0.999906		-0.05	0.999547		-0.05	1.00048		-0.0501001	0.997783		-0.05	0.998745		-0.05	0.999122		-0.05	0.994774		-0.0501001	0.998449		-0.0501001	0.997399		-0.05	0.998375		-0.05	0.998893		-0.05	0.999917		-0.0501001	0.997694		-0.05	0.999076		-0.05	0.998847		-0.05	0.99835
0	0.998635		0	1.00213		0	0.996057		0	0.997302		0	0.998118		0	0.998521		0	1.00123		0	1.00058		0	0.999633		0	0.996341		0	0.999228		0	0.999204		0	0.996938		0	1.00223		0	0.99785		0	0.998458
0.05	0.987507		0.05	0.989072		0.05	0.990925		0.0499001	0.991537		0.0500002	0.986681		0.05	0.990336		0.05	0.987415		0.05	0.990975		0.0499001	0.990495		0.05	0.990125		0.05	0.987797		0.05	0.993229		0.05	0.992401		0.05	0.988859		0.05	0.987115		0.05	0.989208
0.0999999	0.977189		0.0999999	0.979844		0.0999999	0.975789		0.0999	0.975574		0.1	0.97823		0.0999999	0.978834		0.0999999	0.976336		0.0999999	0.979498		0.0999999	0.973198		0.0999999	0.978776		0.0999999	0.976227		0.0999999	0.979764		0.0999999	0.97906		0.0999999	0.974846		0.0999999	0.976526		0.0999999	0.977411
0.15	0.969006		0.15	0.972072		0.15	0.972162		0.15	0.971451		0.15	0.969324		0.15	0.971895		0.15	0.968721		0.15	0.97054		0.15	0.971586		0.15	0.967492		0.15	0.970948		0.15	0.968365		0.15	0.969494		0.15	0.970093		0.15	0.97151		0.15	0.969413
0.2	0.963861		0.2	0.964555		0.2	0.966726		0.2	0.967585		0.2	0.962722		0.2	0.966835		0.2	0.961263		0.2	0.966779		0.2	0.964311		0.2	0.964631		0.2	0.963436		0.2	0.965028		0.2	0.966327		0.2	0.963884		0.2	0.965313		0.2	0.963098
0.25	0.960505		0.25	0.960238		0.25	0.961845		0.25	0.96122		0.2501	0.96421		0.25	0.959985		0.25	0.963125		0.25	0.962566		0.25	0.963172		0.25	0.962231		0.25	0.962199		0.25	0.959919		0.25	0.961719		0.25	0.961787		0.25	0.957598		0.25	0.960777
0.3001	0.958494		0.3	0.957499		0.3	0.955787		0.3	0.957886		0.3001	0.955312		0.3	0.957971		0.3	0.95729		0.3	0.958086		0.3	0.957334		0.3	0.95687		0.3	0.957674		0.3	0.958864		0.3	0.961948		0.3	0.959368		0.3	0.958051		0.3	0.956992
0.3501	0.955148		0.35	0.956668		0.35	0.956668		0.35	0.954804		0.3501	0.953982		0.35	0.954618		0.35	0.955083		0.35	0.95949		0.35	0.955166		0.35	0.955784		0.35	0.952984		0.35	0.953964		0.35	0.955998		0.35	0.954224		0.35	0.957665		0.35	0.955578
0.4001	0.955354		0.4	0.95176		0.4	0.948797		0.4	0.95169		0.4001	0.952154		0.4	0.954452		0.4	0.947912		0.4	0.953896		0.4	0.955417		0.4	0.953962		0.4	0.952097		0.4	0.95137		0.4	0.953436		0.4	0.95282		0.4	0.952025		0.4	0.952927
0.4501	0.95241		0.45	0.949824		0.45	0.952011		0.45	0.949953		0.4501	0.952405		0.45	0.95391		0.45	0.953489		0.45	0.952129		0.45	0.950026		0.45	0.951951		0.45	0.953277		0.45	0.953844		0.45	0.954342		0.45	0.951121		0.45	0.949934		0.45	0.948923
0.5001	0.951274		0.5	0.950639		0.5	0.948764		0.5	0.950511		0.5001	0.947024		0.5	0.949487		0.5	0.950078		0.5	0.950175		0.5	0.946783		0.5	0.949697		0.5	0.952074		0.5	0.949481		0.5	0.950348		0.5	0.950961		0.5	0.948051		0.5	0.94833
0.5501	0.94931		0.55	0.947857		0.55	0.944646		0.55	0.947584		0.5501	0.944615		0.55	0.94487		0.55	0.948421		0.55	0.950395		0.55	0.945576		0.55	0.948646		0.55	0.94707		0.55	0.94825		0.55	0.948497		0.55	0.948141		0.55	0.946933		0.55	0.948454
0.6001	0.947658		0.6	0.949049		0.6	0.939551		0.6	0.944642		0.6001	0.94251		0.6	0.947606		0.6	0.943472		0.6	0.946707		0.6	0.945746		0.6	0.946356		0.6	0.944941		0.6	0.94647		0.6	0.945329		0.6	0.94495		0.6	0.94787		0.6	0.947833
0.6501	0.945861		0.65	0.94419		0.65	0.941053		0.65	0.945397		0.6501	0.942337		0.65	0.942959		0.65	0.94235		0.65	0.947127		0.65	0.942205		0.65	0.946162		0.65	0.946018		0.65	0.94514		0.65	0.945072		0.65	0.945023		0.65	0.944338		0.65	0.944546
0.7001	0.947032		0.7	0.943476		0.7	0.939619		0.7	0.943314		0.7001	0.93839		0.7	0.941906		0.7	0.941894		0.7	0.943012		0.7	0.943001		0.7	0.94133		0.7	0.943723		0.7	0.943952		0.7	0.944915		0.7001	0.941322		0.7	0.9437		0.7	0.944228
0.7501	0.940259		0.75	0.941574		0.75	0.939661		0.75	0.941903		0.7501	0.939808		0.75	0.942868		0.75	0.942807		0.75	0.941462		0.75	0.944185		0.75	0.945465		0.75	0.940405		0.75	0.944556		0.75	0.942086		0.7501	0.942645		0.75	0.943802		0.75	0.942886
0.8001	0.942103		0.8	0.940292		0.8	0.940314		0.8	0.940998		0.8001	0.940825		0.8	0.941487		0.8	0.939608		0.8	0.942093		0.8	0.937217		0.8	0.943293		0.8	0.941359		0.8	0.941688		0.8	0.940514		0.8001	0.940618		0.8001	0.939395		0.8	0.940971
0.8501	0.942163		0.85	0.942026		0.85	0.93683		0.85	0.940714		0.8501	0.933295		0.85	0.940526		0.85	0.939782		0.85	0.940808		0.85	0.9382		0.8501	0.938887		0.85	0.941679		0.85	0.939231		0.85	0.942785		0.8501	0.940328		0.8501	0.941783		0.85	0.93918
0.9001	0.942242		0.9	0.938739		0.9	0.934723		0.9	0.93904		0.9001	0.933971		0.9	0.938769		0.9	0.935023		0.9	0.940838		0.9	0.934281		0.9001	0.93795		0.9	0.934522		0.9	0.94074		0.9	0.939358		0.9001	0.939173		0.9001	0.943173		0.9	0.937217
0.9501	0.939493		0.95	0.935126		0.95	0.93067		0.95	0.937205		0.9501	0.934008		0.95	0.940329		0.95	0.935075		0.95	0.938772		0.95	0.93427		0.9501	0.939048		0.9501	0.935647		0.95	0.939526		0.95	0.93824		0.9501	0.939363		0.9501	0.938148		0.95	0.939113
1.0001	0.938938		1	0.937037		1	0.928965		1	0.937199		1.0001	0.933325		1.0001	0.937816		1	0.930093		1	0.93667		1	0.936562		1.0001	0.934972		1.0001	0.933155		1	0.936302		1	0.938401		1.0001	0.936293		1.0001	0.936461		1	0.93806
1.0501	0.937952		1.05	0.937061		1.05	0.929137		1.05	0.939253		1.0501	0.931782		1.0501	0.938367		1.05	0.932278		1.05	0.937302		1.05	0.930604		1.0501	0.934086		1.0501	0.932908		1.05	0.937204		1.05	0.934789		1.0501	0.937149		1.0501	0.937086		1.05	0.936112
1.1001	0.938337		1.1001	0.934643		1.1	0.929259		1.1	0.934862		1.1001	0.927908		1.1001	0.937376		1.1001	0.932524		1.1	0.936301		1.1	0.933344		1.1001	0.936784		1.1001	0.931839		1.1	0.935581		1.1	0.933482		1.1001	0.934464		1.1001	0.935619		1.1	0.936982
1.1501	0.934303		1.1501	0.937386		1.15	0.923662		1.15	0.934114		1.1501	0.929248		1.1501	0.935694		1.1501	0.927134		1.15	0.932229		1.15	0.930296		1.1501	0.932953		1.1501	0.933831		1.15	0.940446		1.15	0.933671		1.1501	0.933165		1.1501	0.935735		1.15	0.936943
1.2001	0.934018		1.2001	0.932557		1.2001	0.924777		1.2	0.93291		1.2001	0.926906		1.2001	0.933374		1.2001	0.92924		1.2	0.934696		1.2	0.9283		1.2001	0.932626		1.2001	0.930283		1.2	0.933131		1.2	0.934635		1.2001	0.934504		1.2001	0.934028		1.2	0.93629
1.2501	0.934634		1.2501	0.933884		1.2501	0.923108		1.25	0.932065		1.2501	0.92615		1.2501	0.93464		1.2501	0.926921		1.25	0.932171		1.25	0.930847		1.2501	0.933316		1.2501	0.932324		1.25	0.931836		1.25	0.932569		1.2501	0.932164		1.2501	0.934545		1.25	0.932486
1.3001	0.933151		1.3001	0.932244		1.3001	0.9194		1.3	0.930384		1.3001	0.923407		1.3001	0.930623		1.3001	0.92328		1.3	0.933548		1.3	0.925098		1.3001	0.932003		1.3001	0.93002		1.3	0.93353		1.3	0.933577		1.3001	0.932537		1.3001	0.930751		1.3	0.930509
1.3501	0.928904		1.3501	0.933579		1.3501	0.92277		1.35	0.931267		1.3501	0.924278		1.3501	0.933787		1.3501	0.924534		1.35	0.933415		1.35	0.929783		1.3501	0.927798		1.3501	0.929763		1.35	0.932172		1.35	0.931126		1.3501	0.932115		1.3501	0.929873		1.35	0.932473
1.4001	0.932149		1.4001	0.932426		1.4001	0.920042		1.4	0.932554		1.4001	0.922049		1.4001	0.930656		1.4001	0.92515		1.4	0.931863		1.4	0.925054		1.4001	0.931932		1.4001	0.924787		1.4	0.929646		1.4	0.930931		1.4001	0.93318		1.4001	0.929449		1.4	0.932386
1.4501	0.929582		1.4501	0.93021		1.4501	0.919003		1.45	0.930019		1.4501	0.923291		1.4501	0.930353		1.4501	0.924024		1.45	0.933687		1.45	0.923559		1.4501	0.930083		1.4501	0.922796		1.45	0.932559		1.45	0.926684		1.4501	0.92907		1.4501	0.929274		1.45	0.929798
1.5001	0.931343		1.5001	0.928542		1.5001	0.917018		1.5	0.930704		1.5001	0.917847		1.5001	0.928163		1.5001	0.922609		1.5	0.9292		1.5	0.922851		1.5001	0.928527		1.5001	0.922879		1.5	0.930674		1.5	0.927726		1.5001	0.928923		1.5001	0.929082		1.5	0.932855
1.5501	0.930121		1.5501	0.926757		1.5501	0.918524		1.55	0.92925		1.5501	0.919609		1.5501	0.930331		1.5501	0.920045		1.55	0.93139		1.55	0.923014		1.5501	0.928554		1.5501	0.92466		1.55	0.92731		1.55	0.927993		1.5501	0.931642		1.5501	0.929544		1.5501	0.928923
1.6001	0.926503		1.6001	0.930981		1.6001	0.915342		1.6	0.92659		1.6001	0.919312		1.6001	0.928695		1.6001	0.920248		1.6	0.927918		1.6	0.921707		1.6001	0.92838		1.6001	0.926778		1.6	0.932491		1.6	0.92494		1.6001	0.92657		1.6001	0.930687		1.6001	0.927983
1.6501	0.927745		1.6501	0.925837		1.6501	0.918266		1.65	0.92607		1.6501	0.917494		1.6501	0.926858		1.6501	0.91947		1.65	0.92596		1.65	0.916235		1.6501	0.925797		1.6501	0.918744		1.65	0.930193		1.65	0.929571		1.6501	0.931773		1.6501	0.927967		1.6501	0.926791
1.7001	0.926541		1.7001	0.928343		1.7001	0.917126		1.7	0.925193		1.7001	0.916141		1.7001	0.927822		1.7001	0.916718		1.7	0.92522		1.7	0.92104		1.7001	0.928178		1.7001	0.924034		1.7001	0.926705		1.7	0.923566		1.7001	0.927646		1.7001	0.922141		1.7001	0.926498
1.7501	0.926949		1.7501	0.927913		1.7501	0.913627		1.75	0.924565		1.7501	0.915812		1.7501	0.927328		1.7501	0.915089		1.75	0.928702		1.75	0.919038		1.7501	0.928135		1.7501	0.92008		1.7501	0.926648		1.75	0.923923		1.7501	0.926083		1.7501	0.924347		1.7501	0.925721
1.8001	0.923371		1.8001	0.924884		1.8001	0.913634		1.8	0.923705		1.8001	0.915825		1.8001	0.927981		1.8001	0.914475		1.8001	0.928938		1.8	0.919966		1.8001	0.928838		1.8001	0.919982		1.8001	0.927987		1.8001	0.925463		1.8001	0.925383		1.8001	0.924643		1.8001	0.924225
1.8501	0.928678		1.8501	0.92669		1.8501	0.911611		1.85	0.924709		1.8501	0.912504		1.8501	0.923928		1.8501	0.914481		1.8501	0.92429		1.85	0.917151		1.8501	0.924624		1.8501	0.923539		1.8501	0.927299		1.8501	0.921618		1.8501	0.926824		1.8501	0.921147		1.8501	0.919893
1.9001	0.922318		1.9001	0.922368		1.9001	0.90921		1.9	0.92185		1.9001	0.90831		1.9001	0.920263		1.9001	0.914506		1.9001	0.923282		1.9001	0.915193		1.9001	0.922986		1.9001	0.92048		1.9001	0.928388		1.9001	0.921752		1.9001	0.921806		1.9001	0.923135		1.9001	0.924263
1.9501	0.921003		1.9501	0.924078		1.9501	0.909013		1.9501	0.920378		1.9501	0.909718		1.9501	0.922665		1.9501	0.91042		1.9501	0.923362		1.9501	0.916565		1.9501	0.923606		1.9501	0.917697		1.9501	0.922883		1.9501	0.920647		1.9501	0.921446		1.9501	0.921694		1.9501	0.919261
2.0001	0.92446		2.0001	0.923053		2.0001	0.910296		2.0001	0.917895		2.0001	0.911911		2.0001	0.92237		2.0001	0.911724		2.0001	0.922274		2.0001	0.914367		2.0001	0.919997		2.0001	0.917322		2.0001	0.925064		2.0001	0.920603		2.0001	0.922575		2.0001	0.923241		2.0001	0.919712
2.0501	0.921271		2.0501	0.920407		2.0501	0.907858		2.0501	0.922479		2.0501	0.90468		2.0501	0.919659		2.0501	0.909597		2.0501	0.923234		2.0501	0.915835		2.0501	0.921394		2.0501	0.918458		2.0501	0.924116		2.0501	0.918327		2.0501	0.923093		2.0501	0.922148		2.0501	0.923109
2.1001	0.920384		2.1001	0.921347		2.1001	0.903245		2.1001	0.919239		2.1002	0.906781		2.1001	0.921753		2.1001	0.909755		2.1001	0.923065		2.1001	0.909021		2.1001	0.922122		2.1001	0.915231		2.1001	0.922511		2.1001	0.918752		2.1001	0.922731		2.1001	0.921665		2.1001	0.918165
2.1502	0.91895		2.1501	0.922638		2.1501	0.907296		2.1501	0.923844		2.1502	0.907874		2.1501	0.920955		2.1501	0.907409		2.1501	0.921225		2.1501	0.91284		2.1501	0.919895		2.1501	0.912664		2.1501	0.923122		2.1501	0.921584		2.1501	0.925289		2.1501	0.919384		2.1501	0.919023
2.2002	0.919216		2.2001	0.922249		2.2001	0.905277		2.2001	0.919503		2.2002	0.90642		2.2001	0.919974		2.2001	0.911742		2.2001	0.919883		2.2001	0.911936		2.2001	0.920969		2.2001	0.91391		2.2001	0.921499		2.2001	0.92061		2.2001	0.922425		2.2001	0.918827		2.2001	0.917757
2.2502	0.918684		2.2501	0.918317		2.2501	0.903323		2.2501	0.919668		2.2502	0.910036		2.2501	0.921876		2.2501	0.90887		2.2501	0.920068		2.2501	0.909007		2.2501	0.920259		2.2501	0.916079		2.2501	0.920458		2.2501	0.917357		2.2501	0.918782		2.2501	0.918759		2.2501	0.919245
2.3002	0.916765		2.3001	0.917722		2.3001	0.900924		2.3001	0.918715		2.3002	0.903636		2.3001	0.915607		2.3001	0.904284		2.3001	0.918851		2.3001	0.911298		2.3001	0.918047		2.3001	0.912294		2.3001	0.923243		2.3001	0.916035		2.3001	0.919582		2.3001	0.918777		2.3001	0.915166
2.3502	0.918264		2.3501	0.918976		2.3501	0.900128		2.3501	0.91998		2.3502	0.906521		2.3501	0.919343		2.3501	0.908278		2.3501	0.919629		2.3501	0.909014		2.3501	0.915909		2.3501	0.910593		2.3501	0.920637		2.3501	0.91682		2.3501	0.919463		2.3501	0.919671		2.3501	0.917611
2.4002	0.918564		2.4001	0.918752		2.4001	0.901408		2.4001	0.917433		2.4002	0.906733		2.4001	0.916301		2.4001	0.907562		2.4001	0.919846		2.4001	0.907887		2.4001	0.917665		2.4001	0.911288		2.4001	0.919324		2.4001	0.918234		2.4001	0.919301		2.4001	0.917201		2.4001	0.922139
2.4502	0.913694		2.4501	0.916847		2.4501	0.901563		2.4501	0.919137		2.4502	0.899876		2.4501	0.917379		2.4501	0.902641		2.4501	0.919204		2.4501	0.907397		2.4501	0.916717		2.4501	0.913015		2.4501	0.918935		2.4501	0.915503		2.4501	0.917654		2.4501	0.913879		2.4501	0.915154
2.5002	0.913715		2.5001	0.917305		2.5001	0.898674		2.5001	0.91456		2.5002	0.902049		2.5001	0.916162		2.5001	0.90082		2.5001	0.916836		2.5001	0.907377		2.5001	0.916931		2.5001	0.911787		2.5001	0.919297		2.5001	0.916792		2.5001	0.919057		2.5001	0.916527		2.5001	0.916024
2.5502	0.916437		2.5501	0.917618		2.5501	0.900515		2.5501	0.914491		2.5502	0.898865		2.5501	0.913382		2.5501	0.906257		2.5501	0.914639		2.5501	0.904853		2.5501	0.919581		2.5501	0.908839		2.5501	0.916599		2.5501	0.915452		2.5502	0.915372		2.5501	0.914649		2.5501	0.912985
2.6002	0.915364		2.6001	0.916181		2.6001	0.898069		2.6001	0.916725		2.6002	0.898581		2.6001	0.917947		2.6001	0.901371		2.6001	0.916993		2.6001	0.905364		2.6001	0.91713		2.6001	0.90929		2.6001	0.916248		2.6001	0.912293		2.6002	0.917153		2.6001	0.916262		2.6001	0.916857
2.6502	0.914347		2.6501	0.914197		2.6501	0.900482		2.6501	0.914165		2.6502	0.899939		2.6501	0.917526		2.6501	0.903855		2.6501	0.915512		2.6501	0.905127		2.6501	0.91627		2.6501	0.906028		2.6501	0.916277		2.6501	0.913027		2.6502	0.916515		2.6502	0.91573		2.6501	0.914478
2.7002	0.912219		2.7001	0.916561		2.7001	0.901345		2.7001	0.914149		2.7002	0.8952		2.7001	0.916335		2.7001	0.901696		2.7001	0.915403		2.7001	0.901866		2.7002	0.914813		2.7001	0.906444		2.7001	0.917865		2.7001	0.91286		2.7002	0.916903		2.7002	0.912404		2.7001	0.914414
2.7502	0.911813		2.7501	0.916003		2.7501	0.896511		2.7501	0.913684		2.7502	0.894927		2.7501	0.913764		2.7501	0.898211		2.7501	0.91437		2.7501	0.90217		2.7502	0.913045		2.7501	0.907044		2.7501	0.914658		2.7501	0.908258		2.7502	0.917161		2.7502	0.90982		2.7501	0.913844
2.8002	0.91113		2.8001	0.913742		2.8001	0.896049		2.8001	0.914286		2.8002	0.896493		2.8002	0.917029		2.8001	0.898933		2.8001	0.915443		2.8001	0.901547		2.8002	0.914587		2.8002	0.903174		2.8001	0.914984		2.8001	0.911312		2.8002	0.915015		2.8002	0.911994		2.8001	0.913125
2.8502	0.910159		2.8501	0.914441		2.8501	0.894944		2.8501	0.912196		2.8502	0.89607		2.8502	0.913966		2.8501	0.898315		2.8501	0.914882		2.8501	0.901238		2.8502	0.915113		2.8502	0.902347		2.8501	0.914353		2.8501	0.911086		2.8502	0.914735		2.8502	0.912824		2.8501	0.911254
2.9002	0.914991		2.9002	0.915082		2.9001	0.896043		2.9001	0.910364		2.9002	0.897599		2.9002	0.914323		2.9002	0.901381		2.9001	0.915278		2.9001	0.89926		2.9002	0.91112		2.9002	0.905272		2.9001	0.912857		2.9001	0.908104		2.9002	0.911878		2.9002	0.910313		2.9001	0.908658
2.9502	0.911687		2.9502	0.911963		2.9501	0.891739		2.9501	0.913819		2.9502	0.895385		2.9502	0.914234		2.9502	0.898116		2.9501	0.910852		2.9501	0.897209		2.9502	0.910951		2.9502	0.902401		2.9501	0.913844		2.9501	0.908442		2.9502	0.912675		2.9502	0.909283		2.9501	0.909029
3.0002	0.908675		3.0002	0.912845		3.0001	0.8957		3.0001	0.909831		3.0002	0.894684		3.0002	0.912521		3.0002	0.895895		3.0001	0.914248		3.0001	0.8981		3.0002	0.914509		3.0002	0.904346		3.0001	0.912645		3.0001	0.909976		3.0002	0.914727		3.0002	0.906747		3.0001	0.913814
3.0502	0.909906		3.0502	0.912157		3.0502	0.891112		3.0501	0.911185		3.0502	0.892858		3.0502	0.914353		3.0502	0.898839		3.0501	0.913867		3.0501	0.895545		3.0502	0.911739		3.0502	0.903916		3.0501	0.911254		3.0501	0.908235		3.0502	0.911378		3.0502	0.912439		3.0501	0.909659
3.1002	0.908322		3.1002	0.910609		3.1002	0.891631		3.1001	0.911023		3.1002	0.897035		3.1002	0.91374		3.1002	0.894381		3.1001	0.912132		3.1001	0.896988		3.1002	0.909428		3.1002	0.901666		3.1001	0.91077		3.1001	0.908326		3.1002	0.912526		3.1002	0.908357		3.1001	0.910337
3.1502	0.908742		3.1502	0.909516		3.1502	0.885807		3.1501	0.909899		3.1502	0.888633		3.1502	0.911603		3.1502	0.894566		3.1501	0.910403		3.1501	0.897407		3.1502	0.91043		3.1502	0.900455		3.1501	0.913082		3.1501	0.907237		3.1502	0.91084		3.1502	0.910072		3.1501	0.906907
3.2002	0.907409		3.2002	0.910611		3.2002	0.890586		3.2001	0.909565		3.2002	0.890713		3.2002	0.911435		3.2002	0.894333		3.2001	0.913672		3.2001	0.897017		3.2002	0.910737		3.2002	0.903979		3.2001	0.912082		3.2001	0.908696		3.2002	0.909411		3.2002	0.909003		3.2001	0.907153
3.2502	0.90721		3.2502	0.910132		3.2502	0.890031		3.2501	0.907796		3.2502	0.892752		3.2502	0.91201		3.2502	0.893401		3.2501	0.911538		3.2501	0.89833		3.2502	0.906457		3.2502	0.900071		3.2501	0.91405		3.2501	0.905778		3.2502	0.909046		3.2502	0.90806		3.2501	0.910384
3.3002	0.90502		3.3002	0.911087		3.3002	0.890015		3.3001	0.908341		3.3002	0.89138		3.3002	0.910619		3.3002	0.895044		3.3001	0.910815		3.3001	0.896839		3.3002	0.908723		3.3002	0.89717		3.3001	0.909773		3.3001	0.908115		3.3002	0.909502		3.3002	0.907785		3.3001	0.909779
3.3502	0.910358		3.3502	0.908574		3.3502	0.887501		3.3501	0.908832		3.3502	0.890868		3.3502	0.9094		3.3502	0.894241		3.3501	0.912048		3.3501	0.897782		3.3502	0.909338		3.3502	0.897617		3.3501	0.910327		3.3501	0.905703		3.3502	0.90858		3.3502	0.905843		3.3501	0.903078
3.4002	0.905367		3.4002	0.908069		3.4002	0.885697		3.4001	0.907115		3.4002	0.888921		3.4002	0.91095		3.4002	0.893627		3.4001	0.912079		3.4001	0.894488		3.4002	0.910677		3.4002	0.900441		3.4001	0.913902		3.4001	0.905183		3.4002	0.910413		3.4002	0.908213		3.4002	0.905794
3.4502	0.904505		3.4502	0.908792		3.4502	0.886725		3.4501	0.907854		3.4502	0.887551		3.4502	0.909593		3.4502	0.89242		3.4501	0.910487		3.4501	0.892129		3.4502	0.907836		3.4502	0.896297		3.4501	0.90966		3.4501	0.901494		3.4502	0.908601		3.4502	0.909022		3.4502	0.90645
3.5002	0.904442		3.5002	0.908931		3.5002	0.885977		3.5001	0.904872		3.5002	0.885881		3.5002	0.910506		3.5002	0.889171		3.5001	0.907483		3.5001	0.890795		3.5002	0.909067		3.5002	0.897673		3.5002	0.910027		3.5001	0.904239		3.5002	0.908405		3.5002	0.907366		3.5002	0.904674
3.5502	0.902729		3.5502	0.907296		3.5502	0.884404		3.5501	0.905072		3.5502	0.886936		3.5502	0.908966		3.5502	0.890745		3.5501	0.909891		3.5501	0.89202		3.5502	0.907907		3.5502	0.89598		3.5502	0.911011		3.5501	0.902009		3.5502	0.909409		3.5502	0.905167		3.5502	0.906358
3.6002	0.904849		3.6002	0.906918		3.6002	0.887602		3.6001	0.906014		3.6002	0.886758		3.6002	0.908326		3.6002	0.888819		3.6001	0.910148		3.6001	0.89161		3.6002	0.90652		3.6002	0.896482		3.6002	0.910262		3.6001	0.904143		3.6002	0.905444		3.6002	0.905578		3.6002	0.907087
3.6502	0.901255		3.6502	0.906046		3.6502	0.882913		3.6501	0.90485		3.6502	0.887737		3.6502	0.908119		3.6502	0.890854		3.6502	0.908352		3.6501	0.89212		3.6502	0.9086		3.6502	0.896417		3.6502	0.908931		3.6502	0.903839		3.6502	0.907894		3.6502	0.906604		3.6502	0.903091
3.7002	0.905689		3.7002	0.906098		3.7002	0.882881		3.7001	0.90575		3.7002	0.886905		3.7002	0.905013		3.7002	0.887207		3.7002	0.908765		3.7001	0.890527		3.7002	0.905769		3.7002	0.89537		3.7002	0.907646		3.7002	0.900679		3.7002	0.907758		3.7002	0.904343		3.7002	0.902512
3.7502	0.903465		3.7502	0.905827		3.7502	0.882721		3.7501	0.906583		3.7502	0.882377		3.7502	0.90556		3.7502	0.889521		3.7502	0.905721		3.7502	0.889406		3.7502	0.908626		3.7502	0.895137		3.7502	0.906109		3.7502	0.902323		3.7502	0.907395		3.7502	0.903738		3.7502	0.90099
3.8002	0.902576		3.8002	0.905051		3.8002	0.883781		3.8002	0.904174		3.8002	0.8841		3.8002	0.907596		3.8002	0.887533		3.8002	0.90789		3.8002	0.889917		3.8002	0.905472		3.8002	0.894335		3.8002	0.905679		3.8002	0.901111		3.8002	0.90889		3.8002	0.904571		3.8002	0.903609
3.8502	0.9031		3.8502	0.906816		3.8502	0.885918		3.8502	0.906883		3.8502	0.886796		3.8502	0.904892		3.8502	0.887177		3.8502	0.907937		3.8502	0.887937		3.8502	0.903064		3.8502	0.892961		3.8502	0.903843		3.8502	0.900288		3.8502	0.904965		3.8502	0.904435		3.8502	0.900863
3.9002	0.903064		3.9002	0.904574		3.9002	0.883718		3.9002	0.903474		3.9003	0.883553		3.9002	0.90302		3.9002	0.885382		3.9002	0.906306		3.9002	0.889265		3.9002	0.906902		3.9002	0.896412		3.9002	0.907525		3.9002	0.897771		3.9002	0.904165		3.9002	0.906143		3.9002	0.908645
3.9503	0.903405		3.9502	0.907416		3.9502	0.878855		3.9502	0.903258		3.9503	0.88116		3.9502	0.905894		3.9502	0.886798		3.9502	0.906467		3.9502	0.889717		3.9502	0.903935		3.9502	0.893613		3.9502	0.905705		3.9502	0.899408		3.9502	0.90292		3.9502	0.900839		3.9502	0.904001
4.0003	0.899828		4.0002	0.902313		4.0002	0.87774		4.0002	0.90351		4.0003	0.883576		4.0002	0.905151		4.0002	0.883814		4.0002	0.907583		4.0002	0.889804		4.0002	0.903638		4.0002	0.889769		4.0002	0.904955		4.0002	0.896611		4.0002	0.907109		4.0002	0.900905		4.0002	0.901079
4.0503	0.899281		4.0502	0.901753		4.0502	0.877656		4.0502	0.902017		4.0503	0.881775		4.0502	0.903304		4.0502	0.882109		4.0502	0.901821		4.0502	0.888088		4.0502	0.902683		4.0502	0.892423		4.0502	0.905931		4.0502	0.897331		4.0502	0.904199		4.0502	0.899094		4.0502	0.898372
4.1003	0.899522		4.1002	0.903648		4.1002	0.878891		4.1002	0.903947		4.1003	0.880948		4.1002	0.903558		4.1002	0.884314		4.1002	0.906063		4.1002	0.882693		4.1002	0.902574		4.1002	0.892984		4.1002	0.90471		4.1002	0.89889		4.1002	0.905114		4.1002	0.900995		4.1002	0.898714
4.1503	0.901848		4.1502	0.905337		4.1502	0.879658		4.1502	0.900475		4.1503	0.879356		4.1502	0.904484		4.1502	0.885925		4.1502	0.903978		4.1502	0.88171		4.1502	0.904771		4.1502	0.89168		4.1502	0.904891		4.1502	0.897172		4.1502	0.901686		4.1502	0.898517		4.1502	0.900001
4.2003	0.899058		4.2002	0.90184		4.2002	0.877597		4.2002	0.901597		4.2003	0.878628		4.2002	0.902015		4.2002	0.882324		4.2002	0.902595		4.2002	0.885776		4.2002	0.900381		4.2002	0.891837		4.2002	0.905861		4.2002	0.895481		4.2002	0.902998		4.2002	0.89956		4.2002	0.902216
4.2503	0.899414		4.2502	0.902008		4.2502	0.878128		4.2502	0.902326		4.2503	0.880118		4.2502	0.903073		4.2502	0.879825		4.2502	0.902365		4.2502	0.885475		4.2502	0.900544		4.2502	0.887512		4.2502	0.902369		4.2502	0.899642		4.2502	0.902348		4.2502	0.898554		4.2502	0.899464
4.3003	0.899374		4.3002	0.903192		4.3002	0.874787		4.3002	0.900899		4.3003	0.877855		4.3002	0.903302		4.3002	0.882458		4.3002	0.906549		4.3002	0.88324		4.3002	0.902349		4.3002	0.89149		4.3002	0.90424		4.3002	0.896015		4.3002	0.902536		4.3002	0.897756		4.3002	0.89823
4.3503	0.89748		4.3502	0.901426		4.3502	0.878118		4.3502	0.901017		4.3503	0.878905		4.3502	0.90207		4.3502	0.882668		4.3502	0.902887		4.3502	0.883436		4.3502	0.90097		4.3502	0.889084		4.3502	0.904794		4.3502	0.895658		4.3503	0.902662		4.3502	0.899844		4.3502	0.900538
4.4003	0.898344		4.4002	0.899531		4.4002	0.871893		4.4002	0.898335		4.4003	0.878987		4.4002	0.902745		4.4002	0.878929		4.4002	0.904347		4.4002	0.883724		4.4002	0.899877		4.4002	0.891669		4.4002	0.904216		4.4002	0.894568		4.4003	0.901445		4.4002	0.902428		4.4002	0.899897
4.4503	0.896562		4.4502	0.899191		4.4502	0.873569		4.4502	0.901296		4.4503	0.875337		4.4502	0.901864		4.4502	0.881173		4.4502	0.900367		4.4502	0.884429		4.4502	0.90027		4.4502	0.887389		4.4502	0.901358		4.4502	0.892659		4.4503	0.902495		4.4503	0.898535		4.4502	0.900907
4.5003	0.896436		4.5002	0.900143		4.5002	0.875879		4.5002	0.897384		4.5003	0.875924		4.5002	0.898731		4.5002	0.882707		4.5002	0.901438		4.5002	0.881221		4.5003	0.900101		4.5002	0.888643		4.5002	0.903622		4.5002	0.894238		4.5003	0.903914		4.5003	0.898158		4.5002	0.897765
4.5503	0.896445		4.5502	0.90027		4.5502	0.875063		4.5502	0.900741		4.5503	0.87566		4.5502	0.901446		4.5502	0.882095		4.5502	0.900582		4.5502	0.881399		4.5503	0.899568		4.5502	0.887842		4.5502	0.902331		4.5502	0.893727		4.5503	0.899741		4.5503	0.896381		4.5502	0.899028
4.6003	0.895933		4.6002	0.902592		4.6002	0.87451		4.6002	0.897118		4.6003	0.875595		4.6002	0.903154		4.6002	0.879053		4.6002	0.904023		4.6002	0.883717		4.6003	0.902021		4.6003	0.886767		4.6002	0.901954		4.6002	0.893161		4.6003	0.901153		4.6003	0.89586		4.6002	0.900163
4.6503	0.895926		4.6502	0.89737		4.6502	0.870122		4.6502	0.898418		4.6503	0.877549		4.6503	0.898437		4.6502	0.879835		4.6502	0.902306		4.6502	0.881054		4.6503	0.899088		4.6503	0.886679		4.6502	0.900884		4.6502	0.892796		4.6503	0.901631		4.6503	0.899113		4.6502	0.895256
4.7003	0.896431		4.7002	0.898406		4.7002	0.874971		4.7002	0.897378		4.7003	0.878492		4.7003	0.901543		4.7002	0.878392		4.7002	0.900783		4.7002	0.881587		4.7003	0.897672		4.7003	0.887544		4.7002	0.900786		4.7002	0.894413		4.7003	0.902646		4.7003	0.897611		4.7002	0.901135
4.7503	0.894769		4.7503	0.898024		4.7502	0.871906		4.7502	0.897043		4.7503	0.877673		4.7503	0.898284		4.7503	0.87338		4.7502	0.899794		4.7502	0.879685		4.7503	0.89933		4.7503	0.88848		4.7502	0.899692		4.7502	0.890924		4.7503	0.900126		4.7503	0.895899		4.7502	0.893006
4.8003	0.893593		4.8003	0.899709		4.8002	0.873473		4.8002	0.896739		4.8003	0.874769		4.8003	0.900488		4.8003	0.877334		4.8002	0.900346		4.8002	0.878468		4.8003	0.898267		4.8003	0.885162		4.8002	0.901433		4.8002	0.893462		4.8003	0.89843		4.8003	0.893884		4.8002	0.896145
4.8503	0.895657		4.8503	0.898954		4.8503	0.871731		4.8502	0.89415		4.8503	0.872485		4.8503	0.897405		4.8503	0.8778		4.8502	0.900264		4.8502	0.88165		4.8503	0.898325		4.8503	0.882324		4.8502	0.9034		4.8502	0.892266		4.8503	0.896794		4.8503	0.898176		4.8502	0.892446
4.9003	0.893026		4.9003	0.898071		4.9003	0.869387		4.9002	0.895488		4.9003	0.871128		4.9003	0.899671		4.9003	0.876034		4.9002	0.901759		4.9002	0.882754		4.9003	0.898578		4.9003	0.885277		4.9002	0.901091		4.9002	0.890174		4.9003	0.899689		4.9003	0.894741		4.9002	0.896368
4.9503	0.893255		4.9503	0.900114		4.9503	0.870762		4.9502	0.894109		4.9503	0.873951		4.9503	0.897929		4.9503	0.87618		4.9502	0.90136		4.9502	0.880385		4.9503	0.89638		4.9503	0.884693		4.9502	0.900423		4.9502	0.892079		4.9503	0.900256		4.9503	0.89304		4.9502	0.896541
5.0003	0.893175		5.0003	0.896695		5.0003	0.870817		5.0002	0.895692		5.0003	0.871912		5.0003	0.895295		5.0003	0.877664		5.0002	0.901277		5.0002	0.882267		5.0003	0.89607		5.0003	0.882578		5.0002	0.898652		5.0002	0.891535		5.0003	0.898567		5.0003	0.894239		5.0002	0.894884
5.0503	0.892026		5.0503	0.899656		5.0503	0.870641		5.0502	0.895644		5.0503	0.871655		5.0503	0.900427		5.0503	0.877842		5.0502	0.901431		5.0502	0.877764		5.0503	0.898697		5.0503	0.88499		5.0502	0.899376		5.0502	0.89052		5.0503	0.896438		5.0503	0.893606		5.0502	0.895122
5.1003	0.889788		5.1003	0.896648		5.1003	0.868624		5.1002	0.896497		5.1003	0.871518		5.1003	0.895899		5.1003	0.874268		5.1002	0.899971		5.1002	0.873623		5.1003	0.897291		5.1003	0.884713		5.1002	0.896498		5.1002	0.890679		5.1003	0.897951		5.1003	0.895091		5.1002	0.894244
5.1503	0.89298		5.1503	0.89584		5.1503	0.868595		5.1502	0.895885		5.1503	0.872427		5.1503	0.895374		5.1503	0.87787		5.1502	0.898913		5.1502	0.877767		5.1503	0.89722		5.1503	0.884336		5.1502	0.898862		5.1502	0.889802		5.1503	0.896938		5.1503	0.895422		5.1502	0.891607
5.2003	0.890503		5.2003	0.896881		5.2003	0.868007		5.2002	0.89097		5.2003	0.870811		5.2003	0.895908		5.2003	0.876687		5.2002	0.899109		5.2002	0.878907		5.2003	0.896326		5.2003	0.882545		5.2002	0.898158		5.2002	0.890245		5.2003	0.89853		5.2003	0.894693		5.2003	0.893571
5.2503	0.889421		5.2503	0.895294		5.2503	0.866633		5.2502	0.892116		5.2503	0.870646		5.2503	0.896665		5.2503	0.875426		5.2502	0.898321		5.2502	0.874101		5.2503	0.89527		5.2503	0.884922		5.2502	0.896986		5.2502	0.886671		5.2503	0.896587		5.2503	0.892036		5.2503	0.89331
5.3003	0.891069		5.3003	0.896467		5.3003	0.870392		5.3002	0.893389		5.3003	0.86816		5.3003	0.895839		5.3003	0.872807		5.3002	0.900495		5.3002	0.876099		5.3003	0.894504		5.3003	0.884121		5.3002	0.897889		5.3002	0.889412		5.3003	0.893742		5.3003	0.892611		5.3003	0.894741
5.3503	0.892171		5.3503	0.894884		5.3503	0.866773		5.3502	0.891221		5.3503	0.868429		5.3503	0.894803		5.3503	0.872275		5.3502	0.895846		5.3502	0.876719		5.3503	0.895622		5.3503	0.882089		5.3503	0.896599		5.3502	0.888445		5.3503	0.897913		5.3503	0.893418		5.3503	0.891071
5.4003	0.891252		5.4003	0.893979		5.4003	0.867761		5.4002	0.892595		5.4003	0.868887		5.4003	0.897266		5.4003	0.873267		5.4002	0.900023		5.4002	0.874893		5.4003	0.89549		5.4003	0.880476		5.4003	0.894591		5.4002	0.888909		5.4003	0.898089		5.4003	0.890729		5.4003	0.891137
5.4503	0.886911		5.4503	0.896115		5.4503	0.868873		5.4502	0.893486		5.4503	0.865929		5.4503	0.896147		5.4503	0.87067		5.4503	0.899758		5.4502	0.876673		5.4503	0.894936		5.4503	0.881441		5.4503	0.898579		5.4503	0.886288		5.4503	0.895311		5.4503	0.888135		5.4503	0.89242
5.5003	0.890649		5.5003	0.89371		5.5003	0.862843		5.5002	0.893678		5.5003	0.866945		5.5003	0.896547		5.5003	0.873175		5.5003	0.898812		5.5002	0.878652		5.5003	0.895102		5.5003	0.878486		5.5003	0.896357		5.5003	0.887382		5.5003	0.894325		5.5003	0.892466		5.5003	0.891981
5.5503	0.887857		5.5503	0.894646		5.5503	0.867091		5.5502	0.895139		5.5503	0.869702		5.5503	0.896428		5.5503	0.871319		5.5503	0.897161		5.5502	0.871943		5.5503	0.893079		5.5503	0.879702		5.5503	0.893186		5.5503	0.888979		5.5503	0.892213		5.5503	0.889618		5.5503	0.891269
5.6003	0.889967		5.6003	0.892567		5.6003	0.86523		5.6003	0.890869		5.6003	0.86658		5.6003	0.89404		5.6003	0.870215		5.6003	0.897267		5.6003	0.873531		5.6003	0.894929		5.6003	0.878789		5.6003	0.895409		5.6003	0.886874		5.6003	0.895448		5.6003	0.890513		5.6003	0.892253
5.6503	0.888205		5.6503	0.895428		5.6503	0.863939		5.6503	0.894607		5.6503	0.870173		5.6503	0.894069		5.6503	0.869456		5.6503	0.893653		5.6503	0.873295		5.6503	0.893271		5.6503	0.8781		5.6503	0.895043		5.6503	0.887974		5.6503	0.894652		5.6503	0.889488		5.6503	0.892915
5.7003	0.888419		5.7003	0.894366		5.7003	0.864111		5.7003	0.891852		5.7003	0.866613		5.7003	0.892823		5.7003	0.870898		5.7003	0.897133		5.7003	0.874006		5.7003	0.894742		5.7003	0.879526		5.7003	0.893709		5.7003	0.884522		5.7003	0.894892		5.7003	0.887692		5.7003	0.890852
5.7503	0.886395		5.7503	0.893921		5.7503	0.864051		5.7503	0.891571		5.7504	0.864752		5.7503	0.893778		5.7503	0.869434		5.7503	0.895941		5.7503	0.870715		5.7503	0.891569		5.7503	0.879702		5.7503	0.895339		5.7503	0.88385		5.7503	0.893356		5.7503	0.892552		5.7503	0.890998
5.8004	0.887655		5.8003	0.894765		5.8003	0.86292		5.8003	0.891745		5.8004	0.865207		5.8003	0.89256		5.8003	0.870726		5.8003	0.895367		5.8003	0.871391		5.8003	0.893773		5.8003	0.878684		5.8003	0.892701		5.8003	0.886922		5.8003	0.892891		5.8003	0.889655		5.8003	0.892066
5.8504	0.88827		5.8503	0.893824		5.8503	0.862925		5.8503	0.891472		5.8504	0.864597		5.8503	0.891547		5.8503	0.869084		5.8503	0.895197		5.8503	0.869918		5.8503	0.890855		5.8503	0.875669		5.8503	0.895267		5.8503	0.884478		5.8503	0.89332		5.8503	0.890659		5.8503	0.888621
5.9004	0.887191		5.9003	0.892058		5.9003	0.86265		5.9003	0.890788		5.9004	0.864065		5.9003	0.89433		5.9003	0.86711		5.9003	0.892962		5.9003	0.874119		5.9003	0.890971		5.9003	0.877856		5.9003	0.89676		5.9003	0.884018		5.9003	0.89172		5.9003	0.886871		5.9003	0.888244
5.9504	0.88594		5.9503	0.891361		5.9503	0.862669		5.9503	0.889043		5.9504	0.865462		5.9503	0.892989		5.9503	0.870603		5.9503	0.893558		5.9503	0.871616		5.9503	0.893231		5.9503	0.878557		5.9503	0.892094		5.9503	0.886195		5.9503	0.891957		5.9503	0.889006		5.9503	0.88996
6.0004	0.884488		6.0003	0.891178		6.0003	0.860038		6.0003	0.890039		6.0004	0.8656		6.0003	0.893167		6.0003	0.869872		6.0003	0.89409		6.0003	0.868256		6.0003	0.893251		6.0003	0.877302		6.0003	0.895726		6.0003	0.888095		6.0003	0.89321		6.0003	0.889303		6.0003	0.88758
6.0504	0.885215		6.0503	0.892382		6.0503	0.860365		6.0503	0.890877		6.0504	0.8625		6.0503	0.889716		6.0503	0.869167		6.0503	0.894424		6.0503	0.87351		6.0503	0.892448		6.0503	0.87936		6.0503	0.891233		6.0503	0.885009		6.0503	0.89172		6.0503	0.888631		6.0503	0.887666
6.1004	0.885543		6.1003	0.889774		6.1003	0.86193		6.1003	0.890491		6.1004	0.863552		6.1003	0.893251		6.1003	0.865932		6.1003	0.895938		6.1003	0.868957		6.1003	0.890931		6.1003	0.877514		6.1003	0.894588		6.1003	0.883499		6.1003	0.892776		6.1003	0.885955		6.1003	0.886733
6.1504	0.886986		6.1503	0.893424		6.1503	0.861634		6.1503	0.889354		6.1504	0.86489		6.1503	0.889707		6.1503	0.869164		6.1503	0.895247		6.1503	0.870238		6.1503	0.890345		6.1503	0.877455		6.1503	0.89319		6.1503	0.884017		6.1503	0.893957		6.1503	0.886417		6.1503	0.886706
6.2004	0.884906		6.2003	0.891428		6.2003	0.861386		6.2003	0.889243		6.2004	0.864235		6.2003	0.892736		6.2003	0.868231		6.2003	0.896553		6.2003	0.869214		6.2003	0.891613		6.2003	0.875091		6.2003	0.891887		6.2003	0.883258		6.2004	0.893072		6.2003	0.888112		6.2003	0.884711
6.2504	0.882958		6.2503	0.889749		6.2503	0.860343		6.2503	0.887621		6.2504	0.8666		6.2503	0.889425		6.2503	0.866064		6.2503	0.891801		6.2503	0.869302		6.2503	0.893026		6.2503	0.872436		6.2503	0.891807		6.2503	0.883561		6.2504	0.891184		6.2503	0.887079		6.2503	0.885485
6.3004	0.884081		6.3003	0.891573		6.3003	0.860719		6.3003	0.890345		6.3004	0.864682		6.3003	0.893496		6.3003	0.866044		6.3003	0.892998		6.3003	0.868532		6.3003	0.893757		6.3003	0.874287		6.3003	0.892401		6.3003	0.885502		6.3004	0.891211		6.3004	0.887696		6.3003	0.889827
6.3504	0.883403		6.3503	0.890477		6.3503	0.857787		6.3503	0.891624		6.3504	0.862222		6.3503	0.891249		6.3503	0.864054		6.3503	0.893296		6.3503	0.865588		6.3504	0.889204		6.3503	0.876234		6.3503	0.893298		6.3503	0.88213		6.3504	0.891925		6.3504	0.885378		6.3503	0.886604
6.4004	0.885373		6.4003	0.892108		6.4003	0.859074		6.4003	0.886629		6.4004	0.861267		6.4003	0.8903		6.4003	0.866939		6.4003	0.893192		6.4003	0.867573		6.4004	0.890802		6.4003	0.871536		6.4003	0.89025		6.4003	0.883628		6.4004	0.888846		6.4004	0.889473		6.4003	0.884359
6.4504	0.883496		6.4503	0.888816		6.4503	0.858001		6.4503	0.887671		6.4504	0.860207		6.4504	0.888652		6.4503	0.863187		6.4503	0.891872		6.4503	0.869065		6.4504	0.887738		6.4504	0.874781		6.4503	0.88799		6.4503	0.882363		6.4504	0.889116		6.4504	0.890316		6.4503	0.883927
6.5004	0.881254		6.5003	0.890271		6.5003	0.858595		6.5003	0.887559		6.5004	0.858843		6.5004	0.889095		6.5003	0.864571		6.5003	0.890571		6.5003	0.866525		6.5004	0.888159		6.5004	0.87226		6.5003	0.892456		6.5003	0.87818		6.5004	0.888902		6.5004	0.885059		6.5003	0.886873
6.5504	0.881442		6.5504	0.88954		6.5503	0.85886		6.5503	0.890099		6.5504	0.860005		6.5504	0.888092		6.5504	0.865409		6.5503	0.893945		6.5503	0.869942		6.5504	0.887504		6.5504	0.872391		6.5503	0.887825		6.5503	0.880666		6.5504	0.892092		6.5504	0.884577		6.5503	0.885427
6.6004	0.884057		6.6004	0.892499		6.6003	0.856003		6.6003	0.885864		6.6004	0.862305		6.6004	0.890363		6.6004	0.860775		6.6003	0.893557		6.6003	0.866614		6.6004	0.887147		6.6004	0.874855		6.6003	0.890561		6.6003	0.877769		6.6004	0.8876		6.6004	0.88644		6.6003	0.884166
6.6504	0.884611		6.6504	0.889119		6.6503	0.858665		6.6503	0.886047		6.6504	0.859972		6.6504	0.890607		6.6504	0.863508		6.6503	0.891521		6.6503	0.86869		6.6504	0.889055		6.6504	0.872776		6.6503	0.888064		6.6503	0.882581		6.6504	0.889513		6.6504	0.887212		6.6503	0.885223
6.7004	0.884947		6.7004	0.888341		6.7004	0.854368		6.7003	0.888021		6.7004	0.860698		6.7004	0.891114		6.7004	0.864187		6.7003	0.893547		6.7003	0.868441		6.7004	0.886777		6.7004	0.872141		6.7003	0.891787		6.7003	0.881859		6.7004	0.888354		6.7004	0.883191		6.7003	0.884703
6.7504	0.88208		6.7504	0.888642		6.7504	0.86045		6.7503	0.888413		6.7504	0.860136		6.7504	0.888848		6.7504	0.86489		6.7503	0.891993		6.7503	0.867807		6.7504	0.888376		6.7504	0.871501		6.7503	0.892185		6.7503	0.879788		6.7504	0.889864		6.7504	0.885321		6.7503	0.883551
6.8004	0.885984		6.8004	0.88989		6.8004	0.854985		6.8003	0.885741		6.8004	0.857917		6.8004	0.889567		6.8004	0.861237		6.8003	0.890298		6.8003	0.867373		6.8004	0.887302		6.8004	0.87302		6.8003	0.893074		6.8003	0.881172		6.8004	0.891953		6.8004	0.883666		6.8003	0.886545
6.8504	0.883523		6.8504	0.888583		6.8504	0.854282		6.8503	0.884384		6.8504	0.858468		6.8504	0.890781		6.8504	0.860543		6.8503	0.890263		6.8503	0.864865		6.8504	0.888569		6.8504	0.870227		6.8503	0.888771		6.8503	0.881286		6.8504	0.889688		6.8504	0.884592		6.8503	0.883112
6.9004	0.880498		6.9004	0.887623		6.9004	0.856204		6.9003	0.886359		6.9004	0.858098		6.9004	0.888499		6.9004	0.865175		6.9003	0.890937		6.9003	0.865136		6.9004	0.887537		6.9004	0.86977		6.9003	0.888147		6.9003	0.88047		6.9004	0.888003		6.9004	0.88218		6.9003	0.885127
6.9504	0.882501		6.9504	0.883176		6.9504	0.855637		6.9503	0.88607		6.9504	0.856716		6.9504	0.890339		6.9504	0.862527		6.9503	0.890275		6.9503	0.863646		6.9504	0.888759		6.9504	0.870328		6.9503	0.889593		6.9503	0.877501		6.9504	0.888637		6.9504	0.884697		6.9503	0.886032
7.0004	0.883002		7.0004	0.886191		7.0004	0.856497		7.0003	0.88508		7.0004	0.860605		7.0004	0.886974		7.0004	0.862546		7.0003	0.891726		7.0003	0.863349		7.0004	0.88519		7.0004	0.869448		7.0003	0.888975		7.0003	0.883515		7.0004	0.88903		7.0004	0.885591		7.0003	0.884113
7.0504	0.884543		7.0504	0.885815		7.0504	0.855488		7.0503	0.884694		7.0504	0.856655		7.0504	0.887396		7.0504	0.859752		7.0503	0.891549		7.0503	0.861751		7.0504	0.887617		7.0504	0.874378		7.0503	0.886671		7.0503	0.879668		7.0504	0.887508		7.0504	0.880142		7.0504	0.885496
7.1004	0.883137		7.1004	0.888301		7.1004	0.854548		7.1003	0.886841		7.1004	0.857568		7.1004	0.884631		7.1004	0.862312		7.1003	0.888664		7.1003	0.866407		7.1004	0.891048		7.1004	0.867269		7.1003	0.888914		7.1003	0.878047		7.1004	0.887777		7.1004	0.882782		7.1004	0.88349
7.1504	0.883109		7.1504	0.886061		7.1504	0.855346		7.1503	0.885215		7.1504	0.856562		7.1504	0.886803		7.1504	0.859469		7.1503	0.889047		7.1503	0.865329		7.1504	0.887671		7.1504	0.868848		7.1504	0.887924		7.1503	0.877695		7.1504	0.887068		7.1504	0.883858		7.1504	0.887192
7.2004	0.88373		7.2004	0.887854		7.2004	0.855198		7.2003	0.884835		7.2004	0.856858		7.2004	0.886592		7.2004	0.860969		7.2003	0.890876		7.2003	0.864794		7.2004	0.886584		7.2004	0.867746		7.2004	0.887288		7.2003	0.878902		7.2004	0.887878		7.2004	0.884357		7.2004	0.883301
7.2504	0.878299		7.2504	0.885715		7.2504	0.852525		7.2503	0.881773		7.2504	0.858466		7.2504	0.886829		7.2504	0.860647		7.2503	0.889812		7.2503	0.865537		7.2504	0.884784		7.2504	0.869789		7.2504	0.886156		7.2503	0.878835		7.2504	0.88547		7.2504	0.882097		7.2504	0.884638
7.3004	0.87983		7.3004	0.885874		7.3004	0.851186		7.3003	0.884259		7.3004	0.859007		7.3004	0.885199		7.3004	0.857952		7.3004	0.890862		7.3003	0.862678		7.3004	0.886035		7.3004	0.872356		7.3004	0.889416		7.3004	0.87777		7.3004	0.887164		7.3004	0.882485		7.3004	0.88349
7.3504	0.88148		7.3504	0.888585		7.3504	0.855324		7.3503	0.885868		7.3504	0.857126		7.3504	0.886149		7.3504	0.858911		7.3504	0.890828		7.3503	0.861288		7.3504	0.885853		7.3504	0.868132		7.3504	0.887539		7.3504	0.881184		7.3504	0.886462		7.3504	0.882926		7.3504	0.88412
7.4004	0.878534		7.4004	0.883739		7.4004	0.850356		7.4003	0.883582		7.4004	0.856259		7.4004	0.888504		7.4004	0.863111		7.4004	0.888792		7.4004	0.863188		7.4004	0.886475		7.4004	0.87047		7.4004	0.888113		7.4004	0.877518		7.4004	0.886654		7.4004	0.88211		7.4004	0.880872
7.4504	0.880209		7.4504	0.881502		7.4504	0.851602		7.4504	0.883055		7.4504	0.857171		7.4504	0.887573		7.4504	0.861262		7.4504	0.886249		7.4504	0.860971		7.4504	0.885157		7.4504	0.869016		7.4504	0.886947		7.4504	0.879475		7.4504	0.888313		7.4504	0.878829		7.4504	0.882236
7.5004	0.877115		7.5004	0.882824		7.5004	0.853326		7.5004	0.882647		7.5004	0.85608		7.5004	0.885723		7.5004	0.858861		7.5004	0.888445		7.5004	0.861447		7.5004	0.884075		7.5004	0.866729		7.5004	0.886051		7.5004	0.87879		7.5004	0.88771		7.5004	0.879508		7.5004	0.883005
7.5504	0.881021		7.5504	0.886832		7.5504	0.851224		7.5504	0.884406		7.5505	0.854616		7.5504	0.885833		7.5504	0.857858		7.5504	0.889962		7.5504	0.860372		7.5504	0.884517		7.5504	0.868767		7.5504	0.885163		7.5504	0.876805		7.5504	0.886171		7.5504	0.879408		7.5504	0.882062
7.6004	0.876398		7.6004	0.885731		7.6004	0.851174		7.6004	0.882695		7.6005	0.850136		7.6004	0.885671		7.6004	0.859853		7.6004	0.887982		7.6004	0.860426		7.6004	0.884496		7.6004	0.869184		7.6004	0.888843		7.6004	0.877856		7.6004	0.887391		7.6004	0.884099		7.6004	0.880509
7.6505	0.880025		7.6504	0.885868		7.6504	0.850924		7.6504	0.883348		7.6505	0.852903		7.6504	0.88712		7.6504	0.857408		7.6504	0.887219		7.6504	0.863343		7.6504	0.88245		7.6504	0.866378		7.6504	0.886486		7.6504	0.875991		7.6504	0.884767		7.6504	0.883664		7.6504	0.885751
7.7005	0.874296		7.7004	0.883063		7.7004	0.850527		7.7004	0.884404		7.7005	0.854795		7.7004	0.886407		7.7004	0.854919		7.7004	0.889386		7.7004	0.860347		7.7004	0.885652		7.7004	0.86713		7.7004	0.886877		7.7004	0.874965		7.7004	0.886867		7.7004	0.880357		7.7004	0.881214
7.7505	0.87565		7.7504	0.887545		7.7504	0.851232		7.7504	0.880422		7.7505	0.854236		7.7504	0.885992		7.7504	0.860385		7.7504	0.886877		7.7504	0.863787		7.7504	0.883689		7.7504	0.866139		7.7504	0.883873		7.7504	0.87597		7.7504	0.883281		7.7504	0.879523		7.7504	0.881229
7.8005	0.875852		7.8004	0.883335		7.8004	0.85155		7.8004	0.880477		7.8005	0.850637		7.8004	0.885284		7.8004	0.855421		7.8004	0.885237		7.8004	0.861422		7.8004	0.883761		7.8004	0.867515		7.8004	0.884452		7.8004	0.874394		7.8004	0.882349		7.8004	0.88289		7.8004	0.882043
7.8505	0.877181		7.8504	0.882982		7.8504	0.849917		7.8504	0.880785		7.8505	0.853049		7.8504	0.883695		7.8504	0.857579		7.8504	0.886693		7.8504	0.860125		7.8504	0.883606		7.8504	0.867286		7.8504	0.88594		7.8504	0.87839		7.8504	0.885738		7.8504	0.882163		7.8504	0.878597
7.9005	0.87545		7.9004	0.884498		7.9004	0.849277		7.9004	0.885005		7.9005	0.853049		7.9004	0.885169		7.9004	0.85458		7.9004	0.887966		7.9004	0.862903		7.9004	0.883094		7.9004	0.865593		7.9004	0.884645		7.9004	0.874709		7.9004	0.886164		7.9004	0.8807		7.9004	0.876785
7.9505	0.87708		7.9504	0.884073		7.9504	0.848779		7.9504	0.88084		7.9505	0.85232		7.9504	0.884128		7.9504	0.852942		7.9504	0.886766		7.9504	0.860144		7.9504	0.884805		7.9504	0.869135		7.9504	0.887022		7.9504	0.874024		7.9504	0.886443		7.9504	0.882086		7.9504	0.878915
8.0005	0.875779		8.0004	0.88374		8.0004	0.848116		8.0004	0.87968		8.0005	0.849138		8.0004	0.885429		8.0004	0.857343		8.0004	0.888079		8.0004	0.86059		8.0004	0.883262		8.0004	0.866675		8.0004	0.883036		8.0004	0.873628		8.0005	0.884806		8.0004	0.875794		8.0004	0.879761
8.0505	0.876723		8.0504	0.885584		8.0504	0.846711		8.0504	0.879368		8.0505	0.853096		8.0504	0.883349		8.0504	0.85921		8.0504	0.884198		8.0504	0.861373		8.0504	0.883351		8.0504	0.866891		8.0504	0.882429		8.0504	0.876466		8.0505	0.885259		8.0504	0.878418		8.0504	0.879417
8.1005	0.876722		8.1004	0.883579		8.1004	0.8475		8.1004	0.881644		8.1005	0.853938		8.1004	0.886721		8.1004	0.855713		8.1004	0.887334		8.1004	0.857152		8.1004	0.881167		8.1004	0.862731		8.1004	0.886311		8.1004	0.877781		8.1005	0.882854		8.1005	0.878677		8.1004	0.880701
8.1505	0.877883		8.1504	0.881577		8.1504	0.846245		8.1504	0.881732		8.1505	0.849887		8.1504	0.882983		8.1504	0.858556		8.1504	0.887839		8.1504	0.859794		8.1505	0.885058		8.1504	0.86541		8.1504	0.88675		8.1504	0.877654		8.1505	0.884343		8.1505	0.878582		8.1504	0.881239
8.2005	0.878592		8.2004	0.88334		8.2004	0.844587		8.2004	0.883844		8.2005	0.852821		8.2004	0.883539		8.2004	0.855912		8.2004	0.884558		8.2004	0.861338		8.2005	0.884831		8.2004	0.864664		8.2004	0.884298		8.2004	0.875836		8.2005	0.884167		8.2005	0.877891		8.2004	0.880565
8.2505	0.874858		8.2504	0.8825		8.2504	0.845746		8.2504	0.879712		8.2505	0.849207		8.2504	0.88227		8.2504	0.855607		8.2504	0.884013		8.2504	0.855608		8.2505	0.884282		8.2505	0.865792		8.2504	0.88186		8.2504	0.876325		8.2505	0.884231		8.2505	0.880494		8.2504	0.878315
8.3005	0.874368		8.3004	0.88016		8.3004	0.847837		8.3004	0.880681		8.3005	0.847014		8.3005	0.884526		8.3004	0.854175		8.3004	0.889247		8.3004	0.858884		8.3005	0.883224		8.3005	0.86477		8.3004	0.883196		8.3004	0.873383		8.3005	0.88546		8.3005	0.878012		8.3004	0.879736
8.3505	0.875874		8.3504	0.881334		8.3504	0.845463		8.3504	0.879131		8.3505	0.852573		8.3505	0.884556		8.3504	0.854919		8.3504	0.884373		8.3504	0.85842		8.3505	0.882129		8.3505	0.865604		8.3504	0.88131		8.3504	0.87433		8.3505	0.882526		8.3505	0.877675		8.3504	0.878015
8.4005	0.877187		8.4005	0.883658		8.4004	0.848863		8.4004	0.88034		8.4005	0.848355		8.4005	0.883398		8.4005	0.854858		8.4004	0.888112		8.4004	0.857718		8.4005	0.88118		8.4005	0.869372		8.4004	0.882698		8.4004	0.873337		8.4005	0.8822		8.4005	0.877288		8.4004	0.879645
8.4505	0.875112		8.4505	0.880796		8.4504	0.846538		8.4504	0.880404		8.4505	0.852813		8.4505	0.881993		8.4505	0.85307		8.4504	0.886842		8.4504	0.858241		8.4505	0.883893		8.4505	0.865761		8.4504	0.883028		8.4504	0.873629		8.4505	0.882593		8.4505	0.876149		8.4504	0.878384
8.5005	0.874451		8.5005	0.883072		8.5005	0.844531		8.5004	0.8776		8.5005	0.849112		8.5005	0.879977		8.5005	0.850463		8.5004	0.8835		8.5004	0.85864		8.5005	0.881272		8.5005	0.863742		8.5004	0.882759		8.5004	0.871631		8.5005	0.881423		8.5005	0.87718		8.5004	0.879842
8.5505	0.87312		8.5505	0.879977		8.5505	0.848622		8.5504	0.881089		8.5505	0.849804		8.5505	0.885467		8.5505	0.855258		8.5504	0.884766		8.5504	0.857253		8.5505	0.880594		8.5505	0.866145		8.5504	0.881345		8.5504	0.872064		8.5505	0.882326		8.5505	0.876384		8.5504	0.878174
8.6005	0.87571		8.6005	0.88057		8.6005	0.847033		8.6004	0.879415		8.6005	0.850527		8.6005	0.881745		8.6005	0.85222		8.6004	0.884482		8.6004	0.856224		8.6005	0.882533		8.6005	0.861495		8.6004	0.886425		8.6004	0.872157		8.6005	0.879982		8.6005	0.876931		8.6004	0.879461
8.6505	0.876562		8.6505	0.88328		8.6505	0.846409		8.6504	0.880524		8.6505	0.848504		8.6505	0.880692		8.6505	0.854634		8.6504	0.885536		8.6504	0.856446		8.6505	0.880471		8.6505	0.864028		8.6504	0.881408		8.6504	0.872501		8.6505	0.882299		8.6505	0.877825		8.6504	0.876883
8.7005	0.874222		8.7005	0.881862		8.7005	0.848219		8.7004	0.877864		8.7005	0.846805		8.7005	0.8824		8.7005	0.854333		8.7004	0.885944		8.7004	0.854572		8.7005	0.879963		8.7005	0.86368		8.7004	0.881817		8.7004	0.871839		8.7005	0.882366		8.7005	0.879769		8.7004	0.878222
8.7505	0.872961		8.7505	0.882016		8.7505	0.847536		8.7504	0.877388		8.7505	0.851447		8.7505	0.880556		8.7505	0.852464		8.7504	0.886319		8.7504	0.856289		8.7505	0.88069		8.7505	0.86131		8.7504	0.883978		8.7504	0.873462		8.7505	0.880776		8.7505	0.877851		8.7504	0.880019
8.8005	0.873552		8.8005	0.879765		8.8005	0.844503		8.8004	0.879791		8.8005	0.846411		8.8005	0.880768		8.8005	0.854827		8.8004	0.88288		8.8004	0.854219		8.8005	0.879187		8.8005	0.864222		8.8004	0.880476		8.8004	0.872742		8.8005	0.881841		8.8005	0.876022		8.8004	0.878206
8.8505	0.872361		8.8505	0.87972		8.8505	0.847249		8.8504	0.879534		8.8505	0.847739		8.8505	0.880548		8.8505	0.852918		8.8504	0.88597		8.8504	0.85541		8.8505	0.881796		8.8505	0.864718		8.8504	0.883327		8.8504	0.869365		8.8505	0.881157		8.8505	0.875606		8.8505	0.877156
8.9005	0.874266		8.9005	0.882513		8.9005	0.843294		8.9004	0.878296		8.9005	0.845323		8.9005	0.8793		8.9005	0.851172		8.9004	0.883834		8.9004	0.859531		8.9005	0.876557		8.9005	0.864721		8.9004	0.883131		8.9004	0.869191		8.9005	0.881296		8.9005	0.874584		8.9005	0.877002
8.9505	0.875658		8.9505	0.87991		8.9505	0.846071		8.9504	0.877913		8.9505	0.851357		8.9505	0.880332		8.9505	0.854279		8.9504	0.883757		8.9504	0.856757		8.9505	0.881072		8.9505	0.863153		8.9504	0.879575		8.9504	0.871815		8.9505	0.882536		8.9505	0.875277		8.9505	0.877742
9.0005	0.871504		9.0005	0.87999		9.0005	0.845312		9.0004	0.877774		9.0005	0.847606		9.0005	0.879137		9.0005	0.854625		9.0004	0.885416		9.0004	0.854199		9.0005	0.880572		9.0005	0.862959		9.0005	0.880961		9.0004	0.870464		9.0005	0.879233		9.0005	0.877585		9.0005	0.87489
9.0505	0.872026		9.0505	0.880342		9.0505	0.843496		9.0504	0.879073		9.0505	0.845359		9.0505	0.882467		9.0505	0.850199		9.0504	0.885195		9.0504	0.85431		9.0505	0.878898		9.0505	0.861352		9.0505	0.883741		9.0504	0.872037		9.0505	0.882077		9.0505	0.877155		9.0505	0.877754
9.1005	0.872378		9.1005	0.881804		9.1005	0.841932		9.1004	0.879709		9.1005	0.845959		9.1005	0.881286		9.1005	0.851117		9.1005	0.880833		9.1004	0.856527		9.1005	0.883551		9.1005	0.861602		9.1005	0.881124		9.1005	0.873324		9.1005	0.881286		9.1005	0.877403		9.1005	0.876969
9.1505	0.87102		9.1505	0.88285		9.1505	0.842368		9.1504	0.879677		9.1505	0.846622		9.1505	0.881723		9.1505	0.852604		9.1505	0.882618		9.1504	0.855318		9.1505	0.881698		9.1505	0.863141		9.1505	0.881062		9.1505	0.87186		9.1505	0.879802		9.1505	0.876325		9.1505	0.873816
9.2005	0.872429		9.2005	0.88291		9.2005	0.842566		9.2004	0.878314		9.2005	0.849001		9.2005	0.881585		9.2005	0.851875		9.2005	0.8814		9.2004	0.855549		9.2005	0.879053		9.2005	0.859126		9.2005	0.882147		9.2005	0.867204		9.2005	0.878922		9.2005	0.873911		9.2005	0.879277
9.2505	0.869963		9.2505	0.878641		9.2505	0.843464		9.2505	0.8771		9.2505	0.843688		9.2505	0.879301		9.2505	0.849749		9.2505	0.883889		9.2505	0.854994		9.2505	0.878455		9.2505	0.860653		9.2505	0.882107		9.2505	0.869762		9.2505	0.879814		9.2505	0.875439		9.2505	0.876312
9.3005	0.875669		9.3005	0.879017		9.3005	0.842868		9.3005	0.875292		9.3005	0.8471		9.3005	0.879996		9.3005	0.853028		9.3005	0.882465		9.3005	0.855325		9.3005	0.878757		9.3005	0.859214		9.3005	0.880915		9.3005	0.86997		9.3005	0.881351		9.3005	0.872559		9.3005	0.875719
9.3505	0.8723		9.3505	0.880306		9.3505	0.843785		9.3505	0.880145		9.3505	0.847711		9.3505	0.879731		9.3505	0.849261		9.3505	0.88049		9.3505	0.855064		9.3505	0.877917		9.3505	0.861386		9.3505	0.882874		9.3505	0.870065		9.3505	0.882804		9.3505	0.872607		9.3505	0.874689
9.4005	0.874332		9.4005	0.878002		9.4005	0.841605		9.4005	0.878318		9.4006	0.846357		9.4005	0.879991		9.4005	0.850123		9.4005	0.882712		9.4005	0.853363		9.4005	0.879557		9.4005	0.861931		9.4005	0.879659		9.4005	0.871388		9.4005	0.88195		9.4005	0.873618		9.4005	0.876967
9.4506	0.872102		9.4505	0.87681		9.4505	0.842548		9.4505	0.878974		9.4506	0.845425		9.4505	0.879726		9.4505	0.849816		9.4505	0.883072		9.4505	0.851924		9.4505	0.876606		9.4505	0.860592		9.4505	0.882987		9.4505	0.871436		9.4505	0.879347		9.4505	0.871945		9.4505	0.872585
9.5006	0.871681		9.5005	0.877443		9.5005	0.841958		9.5005	0.876914		9.5006	0.848384		9.5005	0.879969		9.5005	0.850877		9.5005	0.884473		9.5005	0.856024		9.5005	0.879968		9.5005	0.860483		9.5005	0.88157		9.5005	0.870349		9.5005	0.880433		9.5005	0.875378		9.5005	0.874549
9.5506	0.866038		9.5505	0.879982		9.5505	0.842624		9.5505	0.877746		9.5506	0.846606		9.5505	0.879668		9.5505	0.848011		9.5505	0.883846		9.5505	0.853383		9.5505	0.87945		9.5505	0.860076		9.5505	0.883944		9.5505	0.868949		9.5505	0.878565		9.5505	0.873842		9.5505	0.873437
9.6006	0.870671		9.6005	0.879951		9.6005	0.842773		9.6005	0.876145		9.6006	0.842922		9.6005	0.87958		9.6005	0.84963		9.6005	0.883732		9.6005	0.85509		9.6005	0.880175		9.6005	0.862454		9.6005	0.876112		9.6005	0.868513		9.6005	0.879054		9.6005	0.875223		9.6005	0.874485
9.6506	0.872396		9.6505	0.880963		9.6505	0.839168		9.6505	0.87559		9.6506	0.846614		9.6505	0.877813		9.6505	0.849318		9.6505	0.882516		9.6505	0.852943		9.6505	0.879728		9.6505	0.859811		9.6505	0.880112		9.6505	0.86806		9.6505	0.877674		9.6505	0.872824		9.6505	0.875634
9.7006	0.873671		9.7005	0.878628		9.7005	0.837518		9.7005	0.87642		9.7006	0.843521		9.7005	0.878518		9.7005	0.84828		9.7005	0.881362		9.7005	0.852576		9.7005	0.878639		9.7005	0.859232		9.7005	0.879485		9.7005	0.86942		9.7005	0.877456		9.7005	0.87679		9.7005	0.873263
9.7506	0.871143		9.7505	0.878779		9.7505	0.837611		9.7505	0.876819		9.7506	0.843918		9.7505	0.881403		9.7505	0.848596		9.7505	0.882847		9.7505	0.85274		9.7505	0.877552		9.7505	0.859831		9.7505	0.881186		9.7505	0.868917		9.7505	0.880051		9.7505	0.873882		9.7505	0.874575
9.8006	0.871797		9.8005	0.878345		9.8005	0.839681		9.8005	0.875279		9.8006	0.844663		9.8005	0.878946		9.8005	0.848215		9.8005	0.884336		9.8005	0.853628		9.8005	0.876794		9.8005	0.858535		9.8005	0.88149		9.8005	0.867755		9.8005	0.87957		9.8005	0.875393		9.8005	0.874424
9.8506	0.871623		9.8505	0.877678		9.8505	0.838953		9.8505	0.876336		9.8506	0.843974		9.8505	0.878837		9.8505	0.847276		9.8505	0.881353		9.8505	0.85065		9.8505	0.876261		9.8505	0.861352		9.8505	0.878796		9.8505	0.873742		9.8506	0.878327		9.8505	0.87432		9.8505	0.877895
9.9006	0.873846		9.9005	0.880123		9.9005	0.840631		9.9005	0.87465		9.9006	0.841192		9.9005	0.879422		9.9005	0.850603		9.9005	0.882433		9.9005	0.852832		9.9005	0.881276		9.9005	0.86032		9.9005	0.880392		9.9005	0.868696		9.9006	0.876818		9.9005	0.873403		9.9005	0.875354
9.9506	0.869523		9.9505	0.878594		9.9505	0.838691		9.9505	0.875642		9.9506	0.845059		9.9505	0.877905		9.9505	0.846514		9.9505	0.878951		9.9505	0.853591		9.9505	0.88072		9.9505	0.859289		9.9505	0.878768		9.9505	0.868585		9.9506	0.879247		9.9506	0.874089		9.9505	0.877584
10.0006	0.868311		10.0005	0.878713		10.0005	0.841788		10.0005	0.873764		10.0006	0.842418		10.0005	0.878105		10.0005	0.84756		10.0005	0.882918		10.0005	0.852565		10.0006	0.877584		10.0005	0.857656		10.0005	0.88039		10.0005	0.870706		10.0006	0.880219		10.0006	0.875637		10.0005	0.87396
10.0506	0.870251		10.0505	0.877426		10.0505	0.841435		10.0505	0.87302		10.0506	0.845307		10.0505	0.87715		10.0505	0.849075		10.0505	0.88073		10.0505	0.850269		10.0506	0.877291		10.0505	0.856474		10.0505	0.881432		10.0505	0.868037		10.0506	0.878521		10.0506	0.873787		10.0505	0.869973
10.1006	0.871391		10.1005	0.877717		10.1005	0.837585		10.1005	0.877948		10.1006	0.840395		10.1006	0.878499		10.1005	0.84588		10.1005	0.881836		10.1005	0.850009		10.1006	0.877672		10.1006	0.856611		10.1005	0.878762		10.1005	0.868381		10.1006	0.876122		10.1006	0.875289		10.1005	0.875337
10.1506	0.869203		10.1505	0.877528		10.1505	0.837952		10.1505	0.875168		10.1506	0.841926		10.1506	0.878622		10.1505	0.848617		10.1505	0.88067		10.1505	0.851193		10.1506	0.877581		10.1506	0.860528		10.1505	0.880193		10.1505	0.867994		10.1506	0.877114		10.1506	0.871595		10.1505	0.873492
10.2006	0.869215		10.2005	0.874748		10.2005	0.838964		10.2005	0.876741		10.2006	0.843029		10.2006	0.877436		10.2006	0.848377		10.2005	0.88195		10.2005	0.8537		10.2006	0.876986		10.2006	0.859691		10.2005	0.879359		10.2005	0.868654		10.2006	0.877484		10.2006	0.87069		10.2005	0.87231
10.2506	0.869004		10.2506	0.874228		10.2505	0.841557		10.2505	0.873901		10.2506	0.843188		10.2506	0.879271		10.2506	0.846393		10.2505	0.881681		10.2505	0.850317		10.2506	0.876574		10.2506	0.856739		10.2505	0.879242		10.2505	0.869121		10.2506	0.877925		10.2506	0.872566		10.2505	0.871462
10.3006	0.869183		10.3006	0.877242		10.3005	0.838385		10.3005	0.875542		10.3006	0.844209		10.3006	0.877487		10.3006	0.847222		10.3005	0.880277		10.3005	0.850372		10.3006	0.876914		10.3006	0.85876		10.3005	0.88083		10.3005	0.867511		10.3006	0.87489		10.3006	0.871269		10.3005	0.873066
10.3506	0.869578		10.3506	0.876127		10.3506	0.840583		10.3505	0.873373		10.3506	0.846274		10.3506	0.87849		10.3506	0.84821		10.3505	0.880489		10.3505	0.850915		10.3506	0.878967		10.3506	0.857149		10.3505	0.879078		10.3505	0.869534		10.3506	0.876819		10.3506	0.871688		10.3505	0.872328
10.4006	0.869854		10.4006	0.875525		10.4006	0.840053		10.4005	0.874549		10.4006	0.840972		10.4006	0.874928		10.4006	0.844844		10.4005	0.877626		10.4005	0.85043		10.4006	0.874972		10.4006	0.855242		10.4005	0.876044		10.4005	0.867869		10.4006	0.877032		10.4006	0.870539		10.4005	0.872418
10.4506	0.867662		10.4506	0.876598		10.4506	0.838961		10.4505	0.87328		10.4506	0.843819		10.4506	0.877006		10.4506	0.847683		10.4505	0.881801		10.4505	0.850384		10.4506	0.877169		10.4506	0.858998		10.4505	0.877727		10.4505	0.868424		10.4506	0.87799		10.4506	0.869916		10.4505	0.870813
10.5006	0.867623		10.5006	0.875782		10.5006	0.837153		10.5005	0.87404		10.5006	0.841511		10.5006	0.876866		10.5006	0.848776		10.5005	0.880522		10.5005	0.850603		10.5006	0.879771		10.5006	0.859404		10.5005	0.879105		10.5005	0.865123		10.5006	0.876819		10.5006	0.87196		10.5005	0.875447
10.5506	0.868062		10.5506	0.878791		10.5506	0.840133		10.5505	0.874632		10.5506	0.839079		10.5506	0.877395		10.5506	0.846353		10.5505	0.882165		10.5505	0.848744		10.5506	0.877382		10.5506	0.857587		10.5505	0.879291		10.5505	0.869273		10.5506	0.876937		10.5506	0.870708		10.5505	0.874584
10.6006	0.86861		10.6006	0.876514		10.6006	0.839206		10.6005	0.872738		10.6006	0.841569		10.6006	0.879326		10.6006	0.845824		10.6005	0.880404		10.6005	0.848216		10.6006	0.877747		10.6006	0.857577		10.6005	0.87872		10.6005	0.868781		10.6006	0.876925		10.6006	0.873558		10.6005	0.874276
10.6506	0.868921		10.6506	0.875476		10.6506	0.841759		10.6505	0.872471		10.6506	0.841485		10.6506	0.877131		10.6506	0.846964		10.6505	0.881505		10.6505	0.850915		10.6506	0.87888		10.6506	0.85711		10.6505	0.880589		10.6505	0.866429		10.6506	0.875503		10.6506	0.872175		10.6505	0.874154
10.7006	0.868939		10.7006	0.87544		10.7006	0.837797		10.7005	0.874406		10.7006	0.84204		10.7006	0.874003		10.7006	0.844925		10.7005	0.881082		10.7005	0.849095		10.7006	0.876529		10.7006	0.859369		10.7005	0.877163		10.7005	0.86683		10.7006	0.877909		10.7006	0.869596		10.7006	0.871896
10.7506	0.865775		10.7506	0.875168		10.7506	0.834944		10.7505	0.875621		10.7506	0.840075		10.7506	0.876288		10.7506	0.846534		10.7505	0.878489		10.7505	0.850241		10.7506	0.877204		10.7506	0.859148		10.7505	0.8774		10.7505	0.865555		10.7506	0.877824		10.7506	0.871875		10.7506	0.870679
10.8006	0.869946		10.8006	0.876975		10.8006	0.839379		10.8005	0.870672		10.8006	0.8413		10.8006	0.877787		10.8006	0.842027		10.8005	0.87901		10.8005	0.847692		10.8006	0.87565		10.8006	0.858661		10.8006	0.875919		10.8005	0.867816		10.8006	0.875866		10.8006	0.873258		10.8006	0.873591
10.8506	0.869296		10.8506	0.874879		10.8506	0.836913		10.8505	0.872253		10.8506	0.843552		10.8506	0.875447		10.8506	0.845908		10.8505	0.879391		10.8505	0.848946		10.8506	0.876169		10.8506	0.859259		10.8506	0.880222		10.8505	0.862982		10.8506	0.877309		10.8506	0.87		10.8506	0.872683
10.9006	0.868273		10.9006	0.876825		10.9006	0.838024		10.9005	0.873062		10.9006	0.838399		10.9006	0.873851		10.9006	0.846966		10.9005	0.88147		10.9005	0.850262		10.9006	0.877887		10.9006	0.855767		10.9006	0.876975		10.9005	0.867798		10.9006	0.876126		10.9006	0.869644		10.9006	0.874393
10.9506	0.868718		10.9506	0.876422		10.9506	0.836685		10.9505	0.872493		10.9506	0.840495		10.9506	0.878884		10.9506	0.847037		10.9506	0.881123		10.9505	0.84956		10.9506	0.874263		10.9506	0.855724		10.9506	0.877973		10.9506	0.866074		10.9506	0.874794		10.9506	0.87054		10.9506	0.873432
11.0006	0.869282		11.0006	0.877402		11.0006	0.837451		11.0005	0.874519		11.0006	0.84093		11.0006	0.87761		11.0006	0.84438		11.0006	0.879477		11.0005	0.847194		11.0006	0.875753		11.0006	0.85474		11.0006	0.877403		11.0006	0.865756		11.0006	0.874565		11.0006	0.870093		11.0006	0.872087
11.0506	0.870549		11.0506	0.875366		11.0506	0.835671		11.0506	0.871346		11.0506	0.839664		11.0506	0.877037		11.0506	0.844706		11.0506	0.881822		11.0506	0.847724		11.0506	0.87342		11.0506	0.853837		11.0506	0.877469		11.0506	0.864913		11.0506	0.873979		11.0506	0.872165		11.0506	0.871653
11.1006	0.868807		11.1006	0.875284		11.1006	0.836498		11.1006	0.873972		11.1006	0.84204		11.1006	0.876125		11.1006	0.84335		11.1006	0.879832		11.1006	0.845389		11.1006	0.874175		11.1006	0.859405		11.1006	0.877657		11.1006	0.866578		11.1006	0.876023		11.1006	0.871871		11.1006	0.87388
11.1506	0.870001		11.1506	0.873148		11.1506	0.837408		11.1506	0.873751		11.1506	0.840994		11.1506	0.875551		11.1506	0.84445		11.1506	0.880732		11.1506	0.847957		11.1506	0.87475		11.1506	0.854615		11.1506	0.876831		11.1506	0.865065		11.1506	0.878531		11.1506	0.870587		11.1506	0.872558
11.2006	0.864668		11.2006	0.87748		11.2006	0.839495		11.2006	0.873841		11.2007	0.840442		11.2006	0.876446		11.2006	0.847379		11.2006	0.879969		11.2006	0.848814		11.2006	0.873745		11.2006	0.852888		11.2006	0.876374		11.2006	0.865622		11.2006	0.877294		11.2006	0.870525		11.2006	0.871596
11.2506	0.865687		11.2506	0.876306		11.2506	0.835651		11.2506	0.87137		11.2507	0.84181		11.2506	0.872717		11.2506	0.842814		11.2506	0.881519		11.2506	0.849964		11.2506	0.873959		11.2506	0.855918		11.2506	0.878628		11.2506	0.866408		11.2506	0.876677		11.2506	0.86895		11.2506	0.868077
11.3007	0.86586		11.3006	0.874134		11.3006	0.834971		11.3006	0.874937		11.3007	0.840183		11.3006	0.87613		11.3006	0.84285		11.3006	0.879769		11.3006	0.848167		11.3006	0.87517		11.3006	0.85795		11.3006	0.876922		11.3006	0.865846		11.3006	0.87676		11.3006	0.87259		11.3006	0.867476
11.3507	0.867202		11.3506	0.875804		11.3506	0.835987		11.3506	0.872552		11.3507	0.83666		11.3506	0.877772		11.3506	0.843647		11.3506	0.880643		11.3506	0.849689		11.3506	0.874477		11.3506	0.854671		11.3506	0.875234		11.3506	0.864963		11.3506	0.87423		11.3506	0.871734		11.3506	0.870437
11.4007	0.867242		11.4006	0.876019		11.4006	0.838191		11.4006	0.874135		11.4007	0.839099		11.4006	0.878193		11.4006	0.844207		11.4006	0.878194		11.4006	0.849109		11.4006	0.873172		11.4006	0.856655		11.4006	0.874768		11.4006	0.863552		11.4006	0.874583		11.4006	0.869563		11.4006	0.867427
11.4507	0.868643		11.4506	0.876807		11.4506	0.833006		11.4506	0.870992		11.4507	0.841297		11.4506	0.873844		11.4506	0.843024		11.4506	0.87859		11.4506	0.849705		11.4506	0.876162		11.4506	0.856325		11.4506	0.876491		11.4506	0.861484		11.4506	0.876236		11.4506	0.866182		11.4506	0.871507
11.5007	0.86733		11.5006	0.874315		11.5006	0.833566		11.5006	0.871676		11.5007	0.83656		11.5006	0.87627		11.5006	0.843749		11.5006	0.876783		11.5006	0.847827		11.5006	0.878419		11.5006	0.853959		11.5006	0.872935		11.5006	0.864067		11.5006	0.876065		11.5006	0.869412		11.5006	0.868304
11.5507	0.867747		11.5506	0.874673		11.5506	0.836535		11.5506	0.870882		11.5507	0.839169		11.5506	0.875735		11.5506	0.840655		11.5506	0.877902		11.5506	0.844458		11.5506	0.873692		11.5506	0.852653		11.5506	0.877125		11.5506	0.865218		11.5506	0.875459		11.5506	0.869783		11.5506	0.871097
11.6007	0.86885		11.6006	0.87683		11.6006	0.836348		11.6006	0.873323		11.6007	0.842126		11.6006	0.875625		11.6006	0.842855		11.6006	0.879236		11.6006	0.846731		11.6006	0.874097		11.6006	0.856127		11.6006	0.878365		11.6006	0.864485		11.6006	0.875655		11.6006	0.869279		11.6006	0.87501
11.6507	0.866807		11.6506	0.87528		11.6506	0.835838		11.6506	0.871682		11.6507	0.841936		11.6506	0.875183		11.6506	0.84002		11.6506	0.879413		11.6506	0.84819		11.6506	0.871194		11.6506	0.856108		11.6506	0.876283		11.6506	0.863423		11.6507	0.876265		11.6506	0.871275		11.6506	0.869668
11.7007	0.864785		11.7006	0.873686		11.7006	0.834154		11.7006	0.873678		11.7007	0.839341		11.7006	0.874216		11.7006	0.842589		11.7006	0.876995		11.7006	0.844388		11.7006	0.873426		11.7006	0.852813		11.7006	0.878339		11.7006	0.863089		11.7007	0.872005		11.7006	0.867705		11.7006	0.86787
11.7507	0.866397		11.7506	0.874875		11.7506	0.833005		11.7506	0.871371		11.7507	0.838968		11.7506	0.875627		11.7506	0.842711		11.7506	0.881115		11.7506	0.847139		11.7506	0.874937		11.7506	0.857476		11.7506	0.879393		11.7506	0.86341		11.7507	0.876379		11.7506	0.871199		11.7506	0.869048
11.8007	0.865471		11.8006	0.873793		11.8006	0.836782		11.8006	0.873405		11.8007	0.837674		11.8006	0.873238		11.8006	0.843115		11.8006	0.877276		11.8006	0.847642		11.8007	0.871934		11.8006	0.856039		11.8006	0.875267		11.8006	0.862488		11.8007	0.874702		11.8007	0.868989		11.8006	0.869788
11.8507	0.866375		11.8506	0.87159		11.8506	0.836933		11.8506	0.87079		11.8507	0.840105		11.8506	0.874669		11.8506	0.84431		11.8506	0.874344		11.8506	0.846992		11.8507	0.872679		11.8506	0.85457		11.8506	0.875286		11.8506	0.866005		11.8507	0.87543		11.8507	0.868451		11.8506	0.871352
11.9007	0.868575		11.9006	0.874322		11.9006	0.837676		11.9006	0.869693		11.9007	0.840234		11.9006	0.874944		11.9006	0.839301		11.9006	0.877305		11.9006	0.846527		11.9007	0.874683		11.9006	0.851229		11.9006	0.874759		11.9006	0.860669		11.9007	0.87291		11.9007	0.871108		11.9006	0.870329
11.9507	0.865403		11.9506	0.872363		11.9506	0.833006		11.9506	0.874465		11.9507	0.838229		11.9507	0.872778		11.9506	0.842769		11.9506	0.877547		11.9506	0.848918		11.9507	0.87314		11.9507	0.854754		11.9506	0.878363		11.9506	0.862698		11.9507	0.873364		11.9507	0.867076		11.9506	0.869808
12.0007	0.867319		12.0006	0.877224		12.0006	0.831382		12.0006	0.869708		12.0007	0.838989		12.0007	0.87013		12.0006	0.842994		12.0006	0.878902		12.0006	0.846746		12.0007	0.873405		12.0007	0.854933		12.0006	0.874329		12.0006	0.865883		12.0007	0.874444		12.0007	0.871478		12.0006	0.869918
12.0507	0.862676		12.0507	0.874355		12.0506	0.831916		12.0506	0.869915		12.0507	0.837345		12.0507	0.875388		12.0507	0.843331		12.0506	0.877605		12.0506	0.84871		12.0507	0.871922		12.0507	0.854046		12.0506	0.87793		12.0506	0.859538		12.0507	0.873692		12.0507	0.867429		12.0506	0.869897
12.1007	0.864373		12.1007	0.873713		12.1006	0.832955		12.1006	0.87112		12.1007	0.837949		12.1007	0.872283		12.1007	0.843257		12.1006	0.87642		12.1006	0.845629		12.1007	0.873807		12.1007	0.852935		12.1006	0.87294		12.1006	0.859886		12.1007	0.871694		12.1007	0.870501		12.1006	0.866806
12.1507	0.864733		12.1507	0.876451		12.1507	0.832049		12.1506	0.872515		12.1507	0.83942		12.1507	0.874366		12.1507	0.844527		12.1506	0.876147		12.1506	0.844742		12.1507	0.874392		12.1507	0.85279		12.1506	0.875863		12.1506	0.862927		12.1507	0.871799		12.1507	0.869258		12.1506	0.86986
12.2007	0.863924		12.2007	0.874972		12.2007	0.83463		12.2006	0.87071		12.2007	0.839989		12.2007	0.874463		12.2007	0.84191		12.2006	0.876944		12.2006	0.846113		12.2007	0.872428		12.2007	0.854262		12.2006	0.87672		12.2006	0.863004		12.2007	0.871079		12.2007	0.868946		12.2006	0.870056
12.2507	0.863591		12.2507	0.87145		12.2507	0.835047		12.2506	0.870002		12.2507	0.83549		12.2507	0.874237		12.2507	0.84182		12.2506	0.877715		12.2506	0.846775		12.2507	0.87113		12.2507	0.851697		12.2506	0.873255		12.2506	0.863745		12.2507	0.873639		12.2507	0.869791		12.2506	0.874506
12.3007	0.86481		12.3007	0.871764		12.3007	0.835654		12.3006	0.872051		12.3007	0.834395		12.3007	0.873291		12.3007	0.843439		12.3006	0.874615		12.3006	0.845583		12.3007	0.873389		12.3007	0.854759		12.3006	0.875091		12.3006	0.864989		12.3007	0.872259		12.3007	0.866441		12.3006	0.870598
12.3507	0.862607		12.3507	0.871317		12.3507	0.830154		12.3506	0.872032		12.3507	0.836569		12.3507	0.873818		12.3507	0.841936		12.3506	0.878012		12.3506	0.844553		12.3507	0.872786		12.3507	0.852611		12.3506	0.874391		12.3506	0.86081		12.3507	0.874674		12.3507	0.867388		12.3506	0.867622
12.4007	0.865255		12.4007	0.87292		12.4007	0.83364		12.4006	0.866654		12.4007	0.837764		12.4007	0.873203		12.4007	0.841584		12.4006	0.877881		12.4006	0.838596		12.4007	0.871525		12.4007	0.853319		12.4006	0.877637		12.4006	0.862458		12.4007	0.876533		12.4007	0.868564		12.4006	0.872221
12.4507	0.862794		12.4507	0.873929		12.4507	0.834544		12.4506	0.870287		12.4507	0.837401		12.4507	0.87678		12.4507	0.838076		12.4506	0.875033		12.4506	0.845689		12.4507	0.874738		12.4507	0.850505		12.4506	0.874488		12.4506	0.865439		12.4507	0.875129		12.4507	0.86792		12.4506	0.867823
12.5007	0.865561		12.5007	0.872282		12.5007	0.832685		12.5006	0.872018		12.5007	0.837979		12.5007	0.871306		12.5007	0.841835		12.5006	0.874505		12.5006	0.846224		12.5007	0.87095		12.5007	0.851694		12.5006	0.875656		12.5006	0.864077		12.5007	0.871566		12.5007	0.866471		12.5006	0.867212
12.5507	0.865507		12.5507	0.872705		12.5507	0.835416		12.5506	0.871375		12.5507	0.835318		12.5507	0.872511		12.5507	0.842401		12.5506	0.875531		12.5506	0.844269		12.5507	0.872404		12.5507	0.853088		12.5506	0.873561		12.5506	0.861259		12.5507	0.872229		12.5507	0.867648		12.5507	0.868078
12.6007	0.863452		12.6007	0.871186		12.6007	0.833364		12.6006	0.871559		12.6007	0.837166		12.6007	0.873904		12.6007	0.841439		12.6006	0.875946		12.6006	0.847126		12.6007	0.875181		12.6007	0.852048		12.6006	0.875731		12.6006	0.860503		12.6007	0.87465		12.6007	0.866802		12.6007	0.870265
12.6507	0.864853		12.6507	0.876262		12.6507	0.834062		12.6506	0.868832		12.6507	0.837736		12.6507	0.870824		12.6507	0.841916		12.6506	0.876724		12.6506	0.846163		12.6507	0.871826		12.6507	0.852011		12.6507	0.874266		12.6506	0.863512		12.6507	0.873452		12.6507	0.867564		12.6507	0.86827
12.7007	0.864361		12.7007	0.87348		12.7007	0.830096		12.7006	0.871651		12.7007	0.836213		12.7007	0.872506		12.7007	0.839103		12.7006	0.87594		12.7006	0.845756		12.7007	0.87198		12.7007	0.85274		12.7007	0.874433		12.7006	0.863745		12.7007	0.87031		12.7007	0.867357		12.7007	0.868184
12.7507	0.864673		12.7507	0.871547		12.7507	0.831991		12.7506	0.871943		12.7507	0.836675		12.7507	0.874154		12.7507	0.840984		12.7507	0.874461		12.7506	0.84539		12.7507	0.872275		12.7507	0.848529		12.7507	0.875249		12.7507	0.86312		12.7507	0.870229		12.7507	0.864953		12.7507	0.869275
12.8007	0.863358		12.8007	0.871869		12.8007	0.830744		12.8006	0.869798		12.8007	0.837301		12.8007	0.87147		12.8007	0.839691		12.8007	0.876667		12.8006	0.845494		12.8007	0.870805		12.8007	0.856734		12.8007	0.87403		12.8007	0.86267		12.8007	0.87153		12.8007	0.867683		12.8007	0.865268
12.8507	0.863173		12.8507	0.871414		12.8507	0.830959		12.8506	0.870841		12.8507	0.835087		12.8507	0.873456		12.8507	0.837154		12.8507	0.874009		12.8506	0.844532		12.8507	0.872158		12.8507	0.849485		12.8507	0.873372		12.8507	0.861069		12.8507	0.87115		12.8507	0.86805		12.8507	0.867667
12.9007	0.86338		12.9007	0.871842		12.9007	0.832375		12.9006	0.872112		12.9007	0.834242		12.9007	0.874043		12.9007	0.838287		12.9007	0.876477		12.9007	0.845907		12.9007	0.871078		12.9007	0.848832		12.9007	0.873439		12.9007	0.863382		12.9007	0.871659		12.9007	0.868605		12.9007	0.869043
12.9507	0.86426		12.9507	0.872419		12.9507	0.832651		12.9507	0.871539		12.9507	0.835014		12.9507	0.872374		12.9507	0.840637		12.9507	0.876014		12.9507	0.844232		12.9507	0.872765		12.9507	0.849735		12.9507	0.875938		12.9507	0.862305		12.9507	0.873388		12.9507	0.865862		12.9507	0.864774
13.0007	0.86533		13.0007	0.872083		13.0007	0.832837		13.0007	0.871465		13.0007	0.836927		13.0007	0.872112		13.0007	0.839277		13.0007	0.877239		13.0007	0.843489		13.0007	0.871591		13.0007	0.851743		13.0007	0.873358		13.0007	0.864218		13.0007	0.874772		13.0007	0.867383		13.0007	0.867464
13.0507	0.862143		13.0507	0.874711		13.0507	0.833733		13.0507	0.867787		13.0508	0.832441		13.0507	0.874131		13.0507	0.841141		13.0507	0.874898		13.0507	0.844652		13.0507	0.871499		13.0507	0.851953		13.0507	0.874349		13.0507	0.860681		13.0507	0.873427		13.0507	0.86946		13.0507	0.870932
13.1008	0.861694		13.1007	0.87317		13.1007	0.831808		13.1007	0.869529		13.1008	0.836405		13.1007	0.872962		13.1007	0.840885		13.1007	0.877129		13.1007	0.844439		13.1007	0.869935		13.1007	0.851624		13.1007	0.874331		13.1007	0.862057		13.1007	0.874314		13.1007	0.868899		13.1007	0.86741
13.1508	0.862186		13.1507	0.871993		13.1507	0.828017		13.1507	0.866672		13.1508	0.834223		13.1507	0.870861		13.1507	0.842052		13.1507	0.874529		13.1507	0.846691		13.1507	0.87039		13.1507	0.849978		13.1507	0.87303		13.1507	0.859143		13.1507	0.874693		13.1507	0.866573		13.1507	0.867503
13.2008	0.864254		13.2007	0.874173		13.2007	0.831311		13.2007	0.872135		13.2008	0.83539		13.2007	0.871888		13.2007	0.83974		13.2007	0.875733		13.2007	0.845488		13.2007	0.869115		13.2007	0.853255		13.2007	0.872702		13.2007	0.861981		13.2007	0.8718		13.2007	0.867705		13.2007	0.866351
13.2508	0.867559		13.2507	0.86972		13.2507	0.831018		13.2507	0.870134		13.2508	0.83486		13.2507	0.872159		13.2507	0.840729		13.2507	0.875394		13.2507	0.842414		13.2507	0.871316		13.2507	0.849421		13.2507	0.872444		13.2507	0.8598		13.2507	0.871405		13.2507	0.866152		13.2507	0.865556
13.3008	0.86532		13.3007	0.87237		13.3007	0.830842		13.3007	0.870853		13.3008	0.836338		13.3007	0.869938		13.3007	0.838493		13.3007	0.875851		13.3007	0.844263		13.3007	0.868962		13.3007	0.852818		13.3007	0.873789		13.3007	0.86084		13.3007	0.870812		13.3007	0.868831		13.3007	0.867204
13.3508	0.86047		13.3507	0.869921		13.3507	0.831647		13.3507	0.868543		13.3508	0.833909		13.3507	0.871013		13.3507	0.834715		13.3507	0.877389		13.3507	0.843495		13.3507	0.869768		13.3507	0.846796		13.3507	0.875181		13.3507	0.86039		13.3507	0.872111		13.3507	0.865388		13.3507	0.868932
13.4008	0.863413		13.4007	0.870365		13.4007	0.830449		13.4007	0.869178		13.4008	0.834719		13.4007	0.871695		13.4007	0.840123		13.4007	0.876018		13.4007	0.84191		13.4007	0.870614		13.4007	0.850157		13.4007	0.87489		13.4007	0.857199		13.4007	0.871258		13.4007	0.866237		13.4007	0.868727
13.4508	0.863424		13.4507	0.870443		13.4507	0.832164		13.4507	0.871015		13.4508	0.836988		13.4507	0.871717		13.4507	0.837077		13.4507	0.876613		13.4507	0.845731		13.4507	0.8705		13.4507	0.848995		13.4507	0.874612		13.4507	0.862181		13.4507	0.869067		13.4507	0.865891		13.4507	0.866654
13.5008	0.860947		13.5007	0.867582		13.5007	0.830478		13.5007	0.86944		13.5008	0.837474		13.5007	0.871547		13.5007	0.83909		13.5007	0.878166		13.5007	0.84175		13.5007	0.869413		13.5007	0.850603		13.5007	0.871374		13.5007	0.861986		13.5008	0.872206		13.5007	0.866656		13.5007	0.869139
13.5508	0.861633		13.5507	0.869179		13.5507	0.829564		13.5507	0.867033		13.5508	0.833558		13.5507	0.8734		13.5507	0.838428		13.5507	0.875809		13.5507	0.841145		13.5507	0.870322		13.5507	0.849105		13.5507	0.873067		13.5507	0.859905		13.5508	0.871819		13.5507	0.867708		13.5507	0.868106
13.6008	0.861558		13.6007	0.871666		13.6007	0.829176		13.6007	0.869481		13.6008	0.836481		13.6007	0.870667		13.6007	0.838702		13.6007	0.874754		13.6007	0.842192		13.6007	0.868543		13.6007	0.850929		13.6007	0.873282		13.6007	0.859395		13.6008	0.870338		13.6008	0.866703		13.6007	0.867098
13.6508	0.862479		13.6507	0.868159		13.6507	0.831539		13.6507	0.87229		13.6508	0.835862		13.6507	0.871551		13.6507	0.838702		13.6507	0.874156		13.6507	0.843198		13.6508	0.869949		13.6507	0.85192		13.6507	0.872589		13.6507	0.86075		13.6508	0.867463		13.6508	0.862971		13.6507	0.867886
13.7008	0.864811		13.7007	0.869351		13.7007	0.831288		13.7007	0.868126		13.7008	0.835047		13.7007	0.869878		13.7007	0.838182		13.7007	0.875853		13.7007	0.844551		13.7008	0.868401		13.7007	0.853437		13.7007	0.871877		13.7007	0.859925		13.7008	0.872441		13.7008	0.866794		13.7007	0.865676
13.7508	0.864482		13.7507	0.871423		13.7507	0.830874		13.7507	0.869606		13.7508	0.835228		13.7508	0.869858		13.7507	0.837088		13.7507	0.875241		13.7507	0.841629		13.7508	0.866243		13.7508	0.849594		13.7507	0.874385		13.7507	0.85886		13.7508	0.874041		13.7508	0.867184		13.7507	0.867761
13.8008	0.862044		13.8007	0.870403		13.8007	0.830831		13.8007	0.865439		13.8008	0.832427		13.8008	0.870157		13.8007	0.840608		13.8007	0.874921		13.8007	0.842561		13.8008	0.872519		13.8008	0.85203		13.8007	0.871264		13.8007	0.861161		13.8008	0.874407		13.8008	0.866336		13.8007	0.865934
13.8508	0.863569		13.8507	0.87164		13.8507	0.830022		13.8507	0.872046		13.8508	0.835976		13.8508	0.873735		13.8508	0.838583		13.8507	0.873031		13.8507	0.840341		13.8508	0.867587		13.8508	0.852236		13.8507	0.8736		13.8507	0.862977		13.8508	0.870612		13.8508	0.865115		13.8507	0.867482
13.9008	0.863978		13.9008	0.869277		13.9007	0.830977		13.9007	0.869733		13.9008	0.834533		13.9008	0.872854		13.9008	0.837304		13.9007	0.87275		13.9007	0.842617		13.9008	0.869723		13.9008	0.851498		13.9007	0.869814		13.9007	0.860791		13.9008	0.871834		13.9008	0.865739		13.9007	0.866024
13.9508	0.862092		13.9508	0.871777		13.9507	0.831767		13.9507	0.871173		13.9508	0.832848		13.9508	0.872534		13.9508	0.841525		13.9507	0.876396		13.9507	0.842435		13.9508	0.870242		13.9508	0.85081		13.9507	0.869823		13.9507	0.860778		13.9508	0.871544		13.9508	0.864027		13.9507	0.865822
14.0008	0.862258		14.0008	0.869065		14.0008	0.832915		14.0007	0.869422		14.0008	0.832706		14.0008	0.871214		14.0008	0.838329		14.0007	0.87547		14.0007	0.843237		14.0008	0.870874		14.0008	0.851402		14.0007	0.872841		14.0007	0.85907		14.0008	0.869682		14.0008	0.866575		14.0007	0.867694
14.0508	0.861516		14.0508	0.872964		14.0508	0.829639		14.0507	0.86865		14.0508	0.835984		14.0508	0.868357		14.0508	0.839742		14.0507	0.87378		14.0507	0.843544		14.0508	0.870885		14.0508	0.850905		14.0507	0.872501		14.0507	0.857614		14.0508	0.869105		14.0508	0.867797		14.0507	0.866481
14.1008	0.863293		14.1008	0.869229		14.1008	0.829382		14.1007	0.868477		14.1008	0.834872		14.1008	0.869986		14.1008	0.836691		14.1007	0.875373		14.1007	0.843995		14.1008	0.869953		14.1008	0.852624		14.1007	0.872747		14.1007	0.85735		14.1008	0.872456		14.1008	0.864659		14.1007	0.865161
14.1508	0.864212		14.1508	0.868369		14.1508	0.829509		14.1507	0.868974		14.1508	0.833212		14.1508	0.870956		14.1508	0.83974		14.1507	0.875364		14.1507	0.839749		14.1508	0.870218		14.1508	0.852051		14.1507	0.871171		14.1507	0.862655		14.1508	0.869454		14.1508	0.865568		14.1507	0.867025
14.2008	0.861104		14.2008	0.869768		14.2008	0.829796		14.2007	0.869162		14.2008	0.834988		14.2008	0.870153		14.2008	0.837933		14.2007	0.877515		14.2007	0.841081		14.2008	0.870784		14.2008	0.848733		14.2007	0.869566		14.2007	0.859667		14.2008	0.871467		14.2008	0.864036		14.2007	0.866562
14.2508	0.862074		14.2508	0.869417		14.2508	0.827568		14.2507	0.870149		14.2508	0.833585		14.2508	0.871067		14.2508	0.841328		14.2507	0.87592		14.2507	0.843198		14.2508	0.869221		14.2508	0.848879		14.2507	0.87502		14.2507	0.860236		14.2508	0.872191		14.2508	0.867602		14.2507	0.867148
14.3008	0.863789		14.3008	0.868974		14.3008	0.828698		14.3007	0.866965		14.3008	0.833986		14.3008	0.871069		14.3008	0.839146		14.3007	0.87445		14.3007	0.84195		14.3008	0.869946		14.3008	0.850328		14.3007	0.873322		14.3007	0.863942		14.3008	0.873349		14.3008	0.866177		14.3007	0.866898
14.3508	0.865455		14.3508	0.873453		14.3508	0.830077		14.3507	0.866836		14.3508	0.832918		14.3508	0.869399		14.3508	0.838852		14.3507	0.873838		14.3507	0.838735		14.3508	0.867929		14.3508	0.85095		14.3507	0.870576		14.3507	0.859036		14.3508	0.871707		14.3508	0.864519		14.3508	0.86517
14.4008	0.860272		14.4008	0.87008		14.4008	0.831575		14.4007	0.867065		14.4008	0.832582		14.4008	0.869511		14.4008	0.836869		14.4007	0.876587		14.4007	0.843892		14.4008	0.86883		14.4008	0.850909		14.4007	0.870348		14.4007	0.859741		14.4008	0.872521		14.4008	0.868137		14.4008	0.865202
14.4508	0.864191		14.4508	0.869494		14.4508	0.830084		14.4507	0.869303		14.4508	0.831872		14.4508	0.871513		14.4508	0.83609		14.4507	0.876101		14.4507	0.840311		14.4508	0.869332		14.4508	0.848901		14.4507	0.873175		14.4507	0.86087		14.4508	0.870379		14.4508	0.863686		14.4508	0.865283
14.5008	0.859751		14.5008	0.869		14.5008	0.827371		14.5007	0.867173		14.5008	0.832288		14.5008	0.871872		14.5008	0.837284		14.5007	0.876687		14.5007	0.839812		14.5008	0.87021		14.5008	0.845258		14.5008	0.873795		14.5007	0.859344		14.5008	0.8713		14.5008	0.86653		14.5008	0.867916
14.5508	0.860094		14.5508	0.870982		14.5508	0.828547		14.5507	0.866992		14.5508	0.835648		14.5508	0.871494		14.5508	0.838586		14.5507	0.873453		14.5507	0.841671		14.5508	0.871083		14.5508	0.848162		14.5508	0.873791		14.5507	0.861979		14.5508	0.871287		14.5508	0.86538		14.5508	0.86636
14.6008	0.863547		14.6008	0.870211		14.6008	0.826325		14.6007	0.865343		14.6008	0.835306		14.6008	0.870801		14.6008	0.835236		14.6008	0.87269		14.6007	0.845563		14.6008	0.870186		14.6008	0.846195		14.6008	0.874213		14.6008	0.860443		14.6008	0.870147		14.6008	0.865914		14.6008	0.865863
14.6508	0.861272		14.6508	0.869843		14.6508	0.82787		14.6507	0.867253		14.6508	0.832502		14.6508	0.871428		14.6508	0.837509		14.6508	0.87394		14.6507	0.839654		14.6508	0.86895		14.6508	0.848291		14.6508	0.870769		14.6508	0.857143		14.6508	0.869612		14.6508	0.866605		14.6508	0.863661
14.7008	0.861653		14.7008	0.869615		14.7008	0.826843		14.7007	0.867943		14.7008	0.832402		14.7008	0.87092		14.7008	0.836316		14.7008	0.872015		14.7008	0.840261		14.7008	0.870144		14.7008	0.849069		14.7008	0.874547		14.7008	0.859159		14.7008	0.868354		14.7008	0.864154		14.7008	0.865785
14.7508	0.858745		14.7508	0.869069		14.7508	0.82821		14.7508	0.866555		14.7508	0.834184		14.7508	0.873313		14.7508	0.839556		14.7508	0.875466		14.7508	0.838839		14.7508	0.869576		14.7508	0.846916		14.7508	0.869262		14.7508	0.858744		14.7508	0.870529		14.7508	0.862547		14.7508	0.864644
14.8008	0.86367		14.8008	0.869935		14.8008	0.829105		14.8008	0.869002		14.8008	0.832675		14.8008	0.872579		14.8008	0.837967		14.8008	0.876854		14.8008	0.842362		14.8008	0.873522		14.8008	0.849444		14.8008	0.871174		14.8008	0.859184		14.8008	0.868793		14.8008	0.863359		14.8008	0.867448
14.8508	0.861309		14.8508	0.870157		14.8508	0.829254		14.8508	0.867607		14.8508	0.833607		14.8508	0.871592		14.8508	0.838296		14.8508	0.872481		14.8508	0.84325		14.8508	0.869844		14.8508	0.852718		14.8508	0.871555		14.8508	0.857668		14.8508	0.870024		14.8508	0.863602		14.8508	0.867934
14.9008	0.861302		14.9008	0.869792		14.9008	0.827644		14.9008	0.868298		14.9009	0.831871		14.9008	0.870621		14.9008	0.837122		14.9008	0.873198		14.9008	0.841056		14.9008	0.869918		14.9008	0.849002		14.9008	0.872562		14.9008	0.861503		14.9008	0.87034		14.9008	0.864842		14.9008	0.866418
14.9509	0.861064		14.9508	0.870115		14.9508	0.825946		14.9508	0.868961		14.9509	0.835326		14.9508	0.871066		14.9508	0.838056		14.9508	0.874249		14.9508	0.842512		14.9508	0.870463		14.9508	0.846099		14.9508	0.873182		14.9508	0.859341		14.9508	0.868467		14.9508	0.865141		14.9508	0.861981
15.0009	0.861822		15.0008	0.870282		15.0008	0.830257		15.0008	0.869267		15.0009	0.834108		15.0008	0.870534		15.0008	0.835407		15.0008	0.873083		15.0008	0.841809		15.0008	0.867945		15.0008	0.846917		15.0008	0.871941		15.0008	0.859023		15.0008	0.870751		15.0008	0.864103		15.0008	0.867279
15.0509	0.859349		15.0508	0.871848		15.0508	0.826479		15.0508	0.867314		15.0509	0.833248		15.0508	0.869809		15.0508	0.835969		15.0508	0.877035		15.0508	0.841065		15.0508	0.867053		15.0508	0.850509		15.0508	0.873111		15.0508	0.859216		15.0508	0.868541		15.0508	0.861157		15.0508	0.865245
15.1009	0.859601		15.1008	0.86994		15.1008	0.830273		15.1008	0.867157		15.1009	0.83391		15.1008	0.868386		15.1008	0.838787		15.1008	0.874666		15.1008	0.840843		15.1008	0.868144		15.1008	0.847657		15.1008	0.871032		15.1008	0.857513		15.1008	0.870784		15.1008	0.865387		15.1008	0.86533
15.1509	0.859523		15.1508	0.87045		15.1508	0.831096		15.1508	0.867158		15.1509	0.835886		15.1508	0.871818		15.1508	0.837789		15.1508	0.871815		15.1508	0.840149		15.1508	0.868686		15.1508	0.848999		15.1508	0.872323		15.1508	0.860025		15.1508	0.870568		15.1508	0.86712		15.1508	0.863622
15.2009	0.860772		15.2008	0.870916		15.2008	0.825631		15.2008	0.864928		15.2009	0.834701		15.2008	0.869448		15.2008	0.838448		15.2008	0.8722		15.2008	0.841442		15.2008	0.869812		15.2008	0.847336		15.2008	0.870036		15.2008	0.856856		15.2008	0.869365		15.2008	0.864308		15.2008	0.866613
15.2509	0.85946		15.2508	0.868989		15.2508	0.828801		15.2508	0.866914		15.2509	0.831254		15.2508	0.870293		15.2508	0.83518		15.2508	0.871708		15.2508	0.841756		15.2508	0.869481		15.2508	0.847389		15.2508	0.870013		15.2508	0.860332		15.2508	0.869587		15.2508	0.86488		15.2508	0.865732
15.3009	0.859543		15.3008	0.868554		15.3008	0.82828		15.3008	0.870096		15.3009	0.830972		15.3008	0.871919		15.3008	0.838144		15.3008	0.873494		15.3008	0.844235		15.3008	0.869935		15.3008	0.849233		15.3008	0.87238		15.3008	0.858472		15.3008	0.871286		15.3008	0.864385		15.3008	0.865817
15.3509	0.860449		15.3508	0.868705		15.3508	0.826911		15.3508	0.866412		15.3509	0.834265		15.3508	0.87069		15.3508	0.836322		15.3508	0.876407		15.3508	0.839228		15.3508	0.869733		15.3508	0.851076		15.3508	0.873374		15.3508	0.857988		15.3509	0.868045		15.3508	0.867839		15.3508	0.86505
15.4009	0.858877		15.4008	0.869532		15.4008	0.827617		15.4008	0.866892		15.4009	0.832674		15.4008	0.866683		15.4008	0.839109		15.4008	0.874315		15.4008	0.839824		15.4008	0.867415		15.4008	0.851742		15.4008	0.868912		15.4008	0.858752		15.4009	0.869004		15.4008	0.862647		15.4008	0.867067
15.4509	0.859662		15.4508	0.870552		15.4508	0.827361		15.4508	0.867727		15.4509	0.83358		15.4508	0.868873		15.4508	0.835703		15.4508	0.872961		15.4508	0.839014		15.4509	0.868203		15.4508	0.849479		15.4508	0.870868		15.4508	0.859447		15.4509	0.867306		15.4509	0.864637		15.4508	0.868576
15.5009	0.860022		15.5008	0.867985		15.5008	0.82759		15.5008	0.865984		15.5009	0.829682		15.5008	0.868079		15.5008	0.835771		15.5008	0.874015		15.5008	0.842041		15.5009	0.871473		15.5008	0.845793		15.5008	0.871819		15.5008	0.857436		15.5009	0.871318		15.5009	0.865541		15.5008	0.866509
15.5509	0.861353		15.5508	0.867778		15.5508	0.82608		15.5508	0.866285		15.5509	0.832768		15.5508	0.869635		15.5508	0.83577		15.5508	0.877214		15.5508	0.840367		15.5509	0.868454		15.5508	0.846661		15.5508	0.870657		15.5508	0.859916		15.5509	0.870327		15.5509	0.866438		15.5508	0.865431
15.6009	0.859473		15.6008	0.868315		15.6008	0.824058		15.6008	0.868416		15.6009	0.831808		15.6009	0.866831		15.6008	0.835593		15.6008	0.871823		15.6008	0.841897		15.6009	0.868446		15.6009	0.847861		15.6008	0.8693		15.6008	0.858513		15.6009	0.868435		15.6009	0.864977		15.6008	0.864027
15.6509	0.859283		15.6508	0.869814		15.6508	0.824359		15.6508	0.864057		15.6509	0.832056		15.6509	0.871257		15.6508	0.832326		15.6508	0.873475		15.6508	0.840248		15.6509	0.871412		15.6509	0.848601		15.6508	0.870358		15.6508	0.856322		15.6509	0.870311		15.6509	0.864606		15.6508	0.865339
15.7009	0.862263		15.7009	0.868698		15.7008	0.82668		15.7008	0.86639		15.7009	0.834443		15.7009	0.869276		15.7009	0.838537		15.7008	0.87369		15.7008	0.840647		15.7009	0.868661		15.7009	0.850844		15.7008	0.870965		15.7008	0.858321		15.7009	0.873903		15.7009	0.867228		15.7008	0.86675
15.7509	0.857744		15.7509	0.867837		15.7508	0.826512		15.7508	0.868412		15.7509	0.834768		15.7509	0.8702		15.7509	0.83751		15.7508	0.871369		15.7508	0.840702		15.7509	0.869366		15.7509	0.846656		15.7508	0.869973		15.7508	0.860111		15.7509	0.87049		15.7509	0.86477		15.7508	0.866397
15.8009	0.858639		15.8009	0.869889		15.8009	0.82731		15.8008	0.868719		15.8009	0.831351		15.8009	0.870417		15.8009	0.836134		15.8008	0.873244		15.8008	0.841372		15.8009	0.868717		15.8009	0.848281		15.8008	0.872653		15.8008	0.858433		15.8009	0.867805		15.8009	0.867044		15.8008	0.863919
15.8509	0.859908		15.8509	0.869141		15.8509	0.828501		15.8508	0.869917		15.8509	0.832082		15.8509	0.869483		15.8509	0.834521		15.8508	0.873456		15.8508	0.842442		15.8509	0.867929		15.8509	0.849861		15.8508	0.86898		15.8508	0.858521		15.8509	0.869403		15.8509	0.864592		15.8508	0.866048
15.9009	0.860051		15.9009	0.869788		15.9009	0.827685		15.9008	0.865016		15.9009	0.832114		15.9009	0.870304		15.9009	0.837911		15.9008	0.871185		15.9008	0.84336		15.9009	0.869532		15.9009	0.845539		15.9008	0.871235		15.9008	0.858553		15.9009	0.869897		15.9009	0.865208		15.9008	0.866314
15.9509	0.862839		15.9509	0.870191		15.9509	0.826864		15.9508	0.866518		15.9509	0.832576		15.9509	0.870159		15.9509	0.836017		15.9508	0.873983		15.9508	0.841856		15.9509	0.869735		15.9509	0.846459		15.9508	0.868641		15.9508	0.859268		15.9509	0.868568		15.9509	0.861271		15.9508	0.866557
16.0009	0.860303		16.0009	0.870716		16.0009	0.829814		16.0008	0.868159		16.0009	0.831214		16.0009	0.87092		16.0009	0.833091		16.0008	0.873171		16.0008	0.840699		16.0009	0.867295		16.0009	0.847892		16.0008	0.872223		16.0008	0.856833		16.0009	0.86905		16.0009	0.863846		16.0008	0.864622
16.0509	0.859229		16.0509	0.869133		16.0509	0.826879		16.0508	0.863837		16.0509	0.831874		16.0509	0.873018		16.0509	0.839281		16.0508	0.873748		16.0508	0.839142		16.0509	0.868189		16.0509	0.849424		16.0508	0.869606		16.0508	0.855518		16.0509	0.869166		16.0509	0.866285		16.0508	0.86431
16.1009	0.860858		16.1009	0.869484		16.1009	0.827878		16.1008	0.868291		16.1009	0.830549		16.1009	0.868691		16.1009	0.83686		16.1008	0.872386		16.1008	0.840594		16.1009	0.867532		16.1009	0.84677		16.1008	0.86989		16.1008	0.856654		16.1009	0.870758		16.1009	0.863023		16.1008	0.864732
16.1509	0.860757		16.1509	0.870388		16.1509	0.827691		16.1508	0.867171		16.1509	0.831034		16.1509	0.870649		16.1509	0.834866		16.1508	0.87211		16.1508	0.839254		16.1509	0.871803		16.1509	0.850424		16.1508	0.869041		16.1508	0.8564		16.1509	0.870234		16.1509	0.862985		16.1508	0.865558
16.2009	0.859616		16.2009	0.870363		16.2009	0.824732		16.2008	0.864677		16.2009	0.831149		16.2009	0.869719		16.2009	0.834552		16.2008	0.873159		16.2008	0.840293		16.2009	0.871333		16.2009	0.847961		16.2008	0.869672		16.2008	0.855627		16.2009	0.868792		16.2009	0.86381		16.2009	0.867017
16.2509	0.858858		16.2509	0.870648		16.2509	0.827781		16.2508	0.865488		16.2509	0.831746		16.2509	0.867983		16.2509	0.836524		16.2508	0.873989		16.2508	0.84014		16.2509	0.870182		16.2509	0.845902		16.2508	0.868916		16.2508	0.857478		16.2509	0.870505		16.2509	0.863563		16.2509	0.865401
16.3009	0.860247		16.3009	0.869727		16.3009	0.826239		16.3008	0.865652		16.3009	0.8321		16.3009	0.866812		16.3009	0.835664		16.3008	0.870449		16.3008	0.840174		16.3009	0.872098		16.3009	0.847564		16.3009	0.868559		16.3008	0.861156		16.3009	0.869673		16.3009	0.863562		16.3009	0.863764
16.3509	0.856386		16.3509	0.867155		16.3509	0.82703		16.3508	0.866224		16.3509	0.829114		16.3509	0.870139		16.3509	0.837648		16.3508	0.870275		16.3508	0.840858		16.3509	0.867359		16.3509	0.847752		16.3509	0.871613		16.3508	0.859273		16.3509	0.868145		16.3509	0.863596		16.3509	0.864779
16.4009	0.857678		16.4009	0.869204		16.4009	0.824154		16.4008	0.863767		16.4009	0.833752		16.4009	0.869666		16.4009	0.834335		16.4009	0.873726		16.4008	0.838409		16.4009	0.871587		16.4009	0.846233		16.4009	0.868728		16.4008	0.857841		16.4009	0.869795		16.4009	0.863078		16.4009	0.865053
16.4509	0.856939		16.4509	0.869729		16.4509	0.824667		16.4508	0.866977		16.4509	0.830154		16.4509	0.867623		16.4509	0.833748		16.4509	0.871423		16.4508	0.839375		16.4509	0.8679		16.4509	0.848023		16.4509	0.867664		16.4509	0.856693		16.4509	0.868567		16.4509	0.861057		16.4509	0.86235
16.5009	0.860205		16.5009	0.869143		16.5009	0.828707		16.5008	0.866143		16.5009	0.82744		16.5009	0.86863		16.5009	0.836366		16.5009	0.871776		16.5008	0.840333		16.5009	0.867892		16.5009	0.847652		16.5009	0.869134		16.5009	0.85738		16.5009	0.871131		16.5009	0.864616		16.5009	0.862896
16.5509	0.857911		16.5509	0.869698		16.5509	0.826704		16.5508	0.866538		16.5509	0.832965		16.5509	0.869458		16.5509	0.836509		16.5509	0.873253		16.5509	0.839727		16.5509	0.868092		16.5509	0.84689		16.5509	0.871261		16.5509	0.855464		16.5509	0.870595		16.5509	0.865528		16.5509	0.866753
16.6009	0.86036		16.6009	0.868061		16.6009	0.825367		16.6009	0.867612		16.6009	0.830485		16.6009	0.867641		16.6009	0.833809		16.6009	0.874374		16.6009	0.840155		16.6009	0.86847		16.6009	0.847801		16.6009	0.869711		16.6009	0.858818		16.6009	0.872866		16.6009	0.863875		16.6009	0.863632
16.6509	0.859006		16.6509	0.866847		16.6509	0.828838		16.6509	0.868077		16.6509	0.827955		16.6509	0.87006		16.6509	0.834786		16.6509	0.873617		16.6509	0.837869		16.6509	0.867583		16.6509	0.845888		16.6509	0.867779		16.6509	0.856765		16.6509	0.866064		16.6509	0.866196		16.6509	0.866158
16.7009	0.862264		16.7009	0.868158		16.7009	0.824964		16.7009	0.864431		16.701	0.831814		16.7009	0.869998		16.7009	0.831822		16.7009	0.871861		16.7009	0.838691		16.7009	0.866637		16.7009	0.845628		16.7009	0.868397		16.7009	0.857247		16.7009	0.867826		16.7009	0.863994		16.7009	0.864857
16.751	0.861013		16.7509	0.867889		16.7509	0.828878		16.7509	0.86569		16.751	0.829872		16.7509	0.870533		16.7509	0.835369		16.7509	0.875463		16.7509	0.840705		16.7509	0.867451		16.7509	0.847858		16.7509	0.870505		16.7509	0.858973		16.7509	0.868029		16.7509	0.865028		16.7509	0.863281
16.801	0.85904		16.8009	0.868219		16.8009	0.824295		16.8009	0.863209		16.801	0.831737		16.8009	0.869276		16.8009	0.834064		16.8009	0.872214		16.8009	0.841155		16.8009	0.868203		16.8009	0.846522		16.8009	0.86854		16.8009	0.857616		16.8009	0.867893		16.8009	0.86712		16.8009	0.864008
16.851	0.858564		16.8509	0.872294		16.8509	0.825188		16.8509	0.866117		16.851	0.831429		16.8509	0.868206		16.8509	0.834185		16.8509	0.872329		16.8509	0.8398		16.8509	0.869573		16.8509	0.846415		16.8509	0.868419		16.8509	0.855512		16.8509	0.867916		16.8509	0.865364		16.8509	0.864628
16.901	0.856637		16.9009	0.871752		16.9009	0.823895		16.9009	0.865308		16.901	0.829369		16.9009	0.867474		16.9009	0.831089		16.9009	0.873959		16.9009	0.83955		16.9009	0.86545		16.9009	0.848845		16.9009	0.870104		16.9009	0.854859		16.9009	0.87081		16.9009	0.861983		16.9009	0.863613
16.951	0.859165		16.9509	0.867823		16.9509	0.825061		16.9509	0.86308		16.951	0.830159		16.9509	0.870392		16.9509	0.834718		16.9509	0.870829		16.9509	0.83881		16.9509	0.865944		16.9509	0.845782		16.9509	0.870047		16.9509	0.855301		16.9509	0.87107		16.9509	0.862799		16.9509	0.865838
17.001	0.857513		17.0009	0.870339		17.0009	0.824407		17.0009	0.866001		17.001	0.831361		17.0009	0.869383		17.0009	0.836324		17.0009	0.869572		17.0009	0.837483		17.0009	0.866942		17.0009	0.848141		17.0009	0.873183		17.0009	0.855506		17.0009	0.868267		17.0009	0.865441		17.0009	0.864149
17.051	0.860041		17.0509	0.866217		17.0509	0.824643		17.0509	0.86674		17.051	0.832028		17.0509	0.866857		17.0509	0.834535		17.0509	0.874144		17.0509	0.838283		17.0509	0.867436		17.0509	0.84822		17.0509	0.871444		17.0509	0.855589		17.0509	0.868158		17.0509	0.86309		17.0509	0.863164
17.101	0.857328		17.1009	0.868348		17.1009	0.827247		17.1009	0.867694		17.101	0.829551		17.1009	0.868889		17.1009	0.833089		17.1009	0.872768		17.1009	0.839473		17.1009	0.866296		17.1009	0.845183		17.1009	0.869587		17.1009	0.856017		17.1009	0.86955		17.1009	0.863647		17.1009	0.866632
17.151	0.858415		17.1509	0.867562		17.1509	0.825488		17.1509	0.865164		17.151	0.827527		17.1509	0.868438		17.1509	0.835726		17.1509	0.873044		17.1509	0.839914		17.1509	0.86635		17.1509	0.847463		17.1509	0.86929		17.1509	0.858858		17.151	0.867653		17.1509	0.867049		17.1509	0.866224
17.201	0.85936		17.2009	0.870964		17.2009	0.825383		17.2009	0.863547		17.201	0.831316		17.2009	0.866575		17.2009	0.834234		17.2009	0.872704		17.2009	0.837517		17.2009	0.868071		17.2009	0.844093		17.2009	0.869146		17.2009	0.857621		17.201	0.868298		17.2009	0.862073		17.2009	0.864306
17.251	0.857046		17.2509	0.86739		17.2509	0.821992		17.2509	0.868696		17.251	0.82886		17.2509	0.869388		17.2509	0.835967		17.2509	0.873847		17.2509	0.841273		17.2509	0.866456		17.2509	0.848276		17.2509	0.870325		17.2509	0.857696		17.251	0.869183		17.251	0.862606		17.2509	0.862758
17.301	0.85631		17.3009	0.869042		17.3009	0.824214		17.3009	0.867797		17.301	0.830087		17.3009	0.867736		17.3009	0.832447		17.3009	0.870555		17.3009	0.837042		17.301	0.86616		17.3009	0.847479		17.3009	0.868821		17.3009	0.858027		17.301	0.867474		17.301	0.86526		17.3009	0.865683
17.351	0.860673		17.3509	0.868889		17.3509	0.826671		17.3509	0.866609		17.351	0.82855		17.3509	0.867472		17.3509	0.834413		17.3509	0.874032		17.3509	0.83988		17.351	0.866018		17.3509	0.844851		17.3509	0.870309		17.3509	0.856998		17.351	0.865822		17.351	0.865132		17.3509	0.863272
17.401	0.858562		17.4009	0.866449		17.4009	0.824931		17.4009	0.86548		17.401	0.829054		17.401	0.866683		17.4009	0.835142		17.4009	0.87269		17.4009	0.83868		17.401	0.867535		17.401	0.846555		17.4009	0.86912		17.4009	0.856449		17.401	0.866667		17.401	0.864668		17.4009	0.866363
17.451	0.861503		17.4509	0.867862		17.4509	0.824845		17.4509	0.868602		17.451	0.829252		17.451	0.869576		17.4509	0.832209		17.4509	0.872685		17.4509	0.836833		17.451	0.868716		17.451	0.84621		17.4509	0.869997		17.4509	0.857256		17.451	0.869454		17.451	0.865048		17.4509	0.863722
17.501	0.858377		17.5009	0.867087		17.5009	0.824579		17.5009	0.863981		17.501	0.828237		17.501	0.868917		17.5009	0.83461		17.5009	0.869943		17.5009	0.839025		17.501	0.868968		17.501	0.846894		17.5009	0.869821		17.5009	0.854853		17.501	0.87063		17.501	0.866423		17.5009	0.864764
17.551	0.859054		17.551	0.870009		17.5509	0.826704		17.5509	0.867493		17.551	0.829857		17.551	0.865701		17.551	0.834378		17.5509	0.872664		17.5509	0.841033		17.551	0.868737		17.551	0.847928		17.5509	0.867139		17.5509	0.855528		17.551	0.867249		17.551	0.863764		17.5509	0.862373
17.601	0.85761		17.601	0.866722		17.6009	0.823169		17.6009	0.867545		17.601	0.831041		17.601	0.87047		17.601	0.833797		17.6009	0.869785		17.6009	0.838588		17.601	0.866308		17.601	0.846767		17.6009	0.87047		17.6009	0.856785		17.601	0.868941		17.601	0.865332		17.6009	0.862897
17.651	0.859965		17.651	0.870321		17.651	0.822333		17.6509	0.867395		17.651	0.82824		17.651	0.867862		17.651	0.83514		17.6509	0.87356		17.6509	0.838018		17.651	0.87009		17.651	0.843478		17.6509	0.868671		17.6509	0.855922		17.651	0.8671		17.651	0.86309		17.6509	0.862493
17.701	0.859995		17.701	0.867633		17.701	0.82391		17.7009	0.86289		17.701	0.828812		17.701	0.869693		17.701	0.836071		17.7009	0.872457		17.7009	0.835837		17.701	0.86486		17.701	0.846435		17.7009	0.870403		17.7009	0.855113		17.701	0.868218		17.701	0.863398		17.7009	0.860829
17.751	0.859267		17.751	0.866961		17.751	0.825121		17.7509	0.866173		17.751	0.828192		17.751	0.869346		17.751	0.835458		17.7509	0.872399		17.7509	0.837593		17.751	0.865562		17.751	0.847458		17.7509	0.869148		17.7509	0.855531		17.751	0.870456		17.751	0.865216		17.7509	0.863416
17.801	0.857936		17.801	0.866981		17.801	0.823389		17.8009	0.866498		17.801	0.82851		17.801	0.869941		17.801	0.837533		17.8009	0.871963		17.8009	0.836565		17.801	0.866123		17.801	0.846361		17.8009	0.868019		17.8009	0.857604		17.801	0.868237		17.801	0.864078		17.8009	0.862791
17.851	0.857123		17.851	0.865732		17.851	0.824613		17.8509	0.863671		17.851	0.829605		17.851	0.869608		17.851	0.833473		17.8509	0.87324		17.8509	0.837237		17.851	0.868514		17.851	0.847988		17.8509	0.871459		17.8509	0.856362		17.851	0.866929		17.851	0.862958		17.8509	0.863431
17.901	0.861708		17.901	0.869386		17.901	0.825544		17.9009	0.862816		17.901	0.831919		17.901	0.865358		17.901	0.837619		17.9009	0.872133		17.9009	0.836255		17.901	0.867419		17.901	0.846046		17.9009	0.869543		17.9009	0.854492		17.901	0.866506		17.901	0.865894		17.9009	0.8637
17.951	0.857218		17.951	0.868806		17.951	0.822728		17.9509	0.863756		17.951	0.827694		17.951	0.868149		17.951	0.834178		17.9509	0.872092		17.9509	0.838835		17.951	0.869661		17.951	0.845946		17.9509	0.870521		17.9509	0.855544		17.951	0.865265		17.951	0.865808		17.9509	0.86397
18.001	0.860824		18.001	0.867278		18.001	0.82407		18.0009	0.865384		18.001	0.830734		18.001	0.867877		18.001	0.834497		18.0009	0.87297		18.0009	0.839363		18.001	0.86918		18.001	0.844797		18.0009	0.868859		18.0009	0.854847		18.001	0.86863		18.001	0.867171		18.001	0.862119
18.051	0.860635		18.051	0.868539		18.051	0.822986		18.0509	0.863656		18.051	0.831515		18.051	0.86547		18.051	0.834556		18.0509	0.873156		18.0509	0.839143		18.051	0.866931		18.051	0.845415		18.0509	0.868183		18.0509	0.855279		18.051	0.868696		18.051	0.863903		18.051	0.862483
18.101	0.856426		18.101	0.869869		18.101	0.822296		18.1009	0.867036		18.101	0.826755		18.101	0.866865		18.101	0.835234		18.1009	0.869714		18.1009	0.8389		18.101	0.867074		18.101	0.844857		18.1009	0.867421		18.1009	0.85715		18.101	0.867541		18.101	0.861451		18.101	0.860907
18.151	0.857753		18.151	0.867631		18.151	0.823257		18.1509	0.864359		18.151	0.831624		18.151	0.86788		18.151	0.834498		18.1509	0.872239		18.1509	0.837974		18.151	0.867403		18.151	0.846136		18.151	0.867862		18.1509	0.856678		18.151	0.868381		18.151	0.863312		18.151	0.865229
18.201	0.8572		18.201	0.868273		18.201	0.82709		18.2009	0.86559		18.201	0.830814		18.201	0.86931		18.201	0.832245		18.2009	0.870835		18.2009	0.83767		18.201	0.866125		18.201	0.848814		18.201	0.869955		18.2009	0.856532		18.201	0.867094		18.201	0.868305		18.201	0.866316
18.251	0.857718		18.251	0.869991		18.251	0.823213		18.2509	0.864886		18.251	0.829104		18.251	0.869897		18.251	0.834501		18.251	0.873449		18.2509	0.839856		18.251	0.866787		18.251	0.847649		18.251	0.867555		18.251	0.85445		18.251	0.868931		18.251	0.866187		18.251	0.865038
18.301	0.858324		18.301	0.866424		18.301	0.826291		18.3009	0.865919		18.301	0.828913		18.301	0.868658		18.301	0.837649		18.301	0.871276		18.3009	0.839344		18.301	0.867193		18.301	0.846328		18.301	0.87004		18.301	0.857013		18.301	0.867831		18.301	0.868096		18.301	0.864163
18.351	0.858573		18.351	0.866603		18.351	0.826238		18.3509	0.862929		18.351	0.828265		18.351	0.866161		18.351	0.834591		18.351	0.874109		18.351	0.836106		18.351	0.868921		18.351	0.844649		18.351	0.867716		18.351	0.857052		18.351	0.866154		18.351	0.866035		18.351	0.865089
18.401	0.858274		18.401	0.867866		18.401	0.82413		18.401	0.86485		18.401	0.826524		18.401	0.868671		18.401	0.833435		18.401	0.870678		18.401	0.839059		18.401	0.86887		18.401	0.84605		18.401	0.865724		18.401	0.856593		18.401	0.866261		18.401	0.863589		18.401	0.862704
18.451	0.85895		18.451	0.865722		18.451	0.825842		18.451	0.865494		18.451	0.831801		18.451	0.868983		18.451	0.834081		18.451	0.871772		18.451	0.836125		18.451	0.865785		18.451	0.846087		18.451	0.869628		18.451	0.853562		18.451	0.866424		18.451	0.868518		18.451	0.86367
18.501	0.857973		18.501	0.865778		18.501	0.826008		18.501	0.865793		18.501	0.828413		18.501	0.869738		18.501	0.834059		18.501	0.873109		18.501	0.837177		18.501	0.870111		18.501	0.846938		18.501	0.866818		18.501	0.855211		18.501	0.866554		18.501	0.865061		18.501	0.861852
18.551	0.86042		18.551	0.866489		18.551	0.824311		18.551	0.864539		18.5511	0.829878		18.551	0.865363		18.551	0.833846		18.551	0.869883		18.551	0.840386		18.551	0.867205		18.551	0.84945		18.551	0.866617		18.551	0.855604		18.551	0.867099		18.551	0.868162		18.551	0.86303
18.6011	0.858345		18.601	0.867059		18.601	0.826809		18.601	0.862798		18.6011	0.829772		18.601	0.867244		18.601	0.832534		18.601	0.870544		18.601	0.836246		18.601	0.869735		18.601	0.84355		18.601	0.869271		18.601	0.855632		18.601	0.864959		18.601	0.866412		18.601	0.859945
18.6511	0.857397		18.651	0.866595		18.651	0.824677		18.651	0.865387		18.6511	0.829027		18.651	0.869236		18.651	0.833736		18.651	0.872687		18.651	0.837224		18.651	0.86846		18.651	0.843765		18.651	0.867545		18.651	0.855713		18.651	0.866842		18.651	0.868307		18.651	0.861516
18.7011	0.857797		18.701	0.869247		18.701	0.827502		18.701	0.866039		18.7011	0.82798		18.701	0.867702		18.701	0.833964		18.701	0.872513		18.701	0.837438		18.701	0.866689		18.701	0.84487		18.701	0.869026		18.701	0.854383		18.701	0.866817		18.701	0.865244		18.701	0.862853
18.7511	0.858602		18.751	0.865322		18.751	0.822237		18.751	0.86592		18.7511	0.824858		18.751	0.866637		18.751	0.831924		18.751	0.873655		18.751	0.835965		18.751	0.864161		18.751	0.843285		18.751	0.865279		18.751	0.856534		18.751	0.867613		18.751	0.866056		18.751	0.865867
18.8011	0.85807		18.801	0.866681		18.801	0.824146		18.801	0.864635		18.8011	0.83076		18.801	0.867166		18.801	0.833048		18.801	0.869633		18.801	0.839227		18.801	0.867446		18.801	0.846522		18.801	0.868533		18.801	0.854506		18.801	0.864742		18.801	0.863202		18.801	0.862906
18.8511	0.856335		18.851	0.867739		18.851	0.823638		18.851	0.86395		18.8511	0.829189		18.851	0.867943		18.851	0.833128		18.851	0.869871		18.851	0.83872		18.851	0.86728		18.851	0.843824		18.851	0.869442		18.851	0.853208		18.851	0.866049		18.851	0.864272		18.851	0.865742
18.9011	0.858142		18.901	0.865932		18.901	0.822082		18.901	0.864263		18.9011	0.829136		18.901	0.867526		18.901	0.832742		18.901	0.870816		18.901	0.837939		18.901	0.868283		18.901	0.84693		18.901	0.868714		18.901	0.856581		18.901	0.8668		18.901	0.864963		18.901	0.865196
18.9511	0.858111		18.951	0.868964		18.951	0.821819		18.951	0.863265		18.9511	0.830629		18.951	0.867031		18.951	0.832624		18.951	0.870423		18.951	0.837967		18.951	0.865354		18.951	0.846885		18.951	0.870511		18.951	0.854608		18.951	0.867896		18.951	0.865467		18.951	0.861751
19.0011	0.852553		19.001	0.865912		19.001	0.82457		19.001	0.865015		19.0011	0.832133		19.001	0.865738		19.001	0.834907		19.001	0.870853		19.001	0.837277		19.001	0.866758		19.001	0.842571		19.001	0.86631		19.001	0.857008		19.0011	0.866474		19.001	0.868009		19.001	0.86697
19.0511	0.857453		19.051	0.867225		19.051	0.826621		19.051	0.860075		19.0511	0.832143		19.051	0.866544		19.051	0.833215		19.051	0.8726		19.051	0.839372		19.051	0.867545		19.051	0.843895		19.051	0.86791		19.051	0.855364		19.0511	0.867203		19.051	0.867251		19.051	0.862655
19.1011	0.859358		19.101	0.866942		19.101	0.825553		19.101	0.86478		19.1011	0.830768		19.101	0.866175		19.101	0.831901		19.101	0.872604		19.101	0.840725		19.1011	0.867298		19.101	0.846995		19.101	0.86752		19.101	0.855748		19.1011	0.868229		19.1011	0.868542		19.101	0.865925
19.1511	0.858946		19.151	0.86838		19.151	0.823877		19.151	0.863016		19.1511	0.828206		19.151	0.867243		19.151	0.83241		19.151	0.87051		19.151	0.838387		19.1511	0.864532		19.151	0.846246		19.151	0.868862		19.151	0.857432		19.1511	0.867606		19.1511	0.864448		19.151	0.86351
19.2011	0.859006		19.201	0.868132		19.201	0.824404		19.201	0.864446		19.2011	0.828532		19.201	0.86434		19.201	0.832448		19.201	0.871061		19.201	0.834871		19.2011	0.865742		19.201	0.843356		19.201	0.868925		19.201	0.854941		19.2011	0.868172		19.2011	0.866338		19.201	0.865084
19.2511	0.857766		19.251	0.867562		19.251	0.819511		19.251	0.865382		19.2511	0.82997		19.2511	0.867852		19.251	0.833194		19.251	0.87183		19.251	0.839585		19.2511	0.865675		19.2511	0.841302		19.251	0.870349		19.251	0.858379		19.2511	0.868535		19.2511	0.86582		19.251	0.864553
19.3011	0.85614		19.301	0.865519		19.301	0.821709		19.301	0.864337		19.3011	0.826863		19.3011	0.866729		19.301	0.832959		19.301	0.871639		19.301	0.83886		19.3011	0.868059		19.3011	0.845547		19.301	0.868424		19.301	0.859395		19.3011	0.868679		19.3011	0.867627		19.301	0.861782
19.3511	0.858624		19.3511	0.868991		19.351	0.822042		19.351	0.861978		19.3511	0.830087		19.3511	0.867005		19.3511	0.832901		19.351	0.869998		19.351	0.835699		19.3511	0.868894		19.3511	0.848165		19.351	0.868063		19.351	0.85649		19.3511	0.866626		19.3511	0.864624		19.351	0.862654
19.4011	0.856289		19.4011	0.867876		19.401	0.823044		19.401	0.866307		19.4011	0.83088		19.4011	0.870272		19.4011	0.832407		19.401	0.871617		19.401	0.837481		19.4011	0.867462		19.4011	0.846058		19.401	0.868167		19.401	0.854257		19.4011	0.868833		19.4011	0.864724		19.401	0.862257
19.4511	0.856608		19.4511	0.866795		19.451	0.824594		19.451	0.864923		19.4511	0.826497		19.4511	0.866687		19.4511	0.832667		19.451	0.869717		19.451	0.838		19.4511	0.866859		19.4511	0.84316		19.451	0.869402		19.451	0.85351		19.4511	0.868796		19.4511	0.864366		19.451	0.866489
19.5011	0.857707		19.5011	0.866324		19.5011	0.823336		19.501	0.864451		19.5011	0.826939		19.5011	0.868295		19.5011	0.830826		19.501	0.871573		19.501	0.835302		19.5011	0.865727		19.5011	0.843074		19.501	0.868025		19.501	0.858592		19.5011	0.870134		19.5011	0.866714		19.501	0.862337
19.5511	0.857953		19.5511	0.868965		19.5511	0.823346		19.551	0.863017		19.5511	0.828516		19.5511	0.868171		19.5511	0.833239		19.551	0.872668		19.551	0.838851		19.5511	0.868551		19.5511	0.844522		19.551	0.867069		19.551	0.854528		19.5511	0.867706		19.5511	0.866434		19.551	0.863639
19.6011	0.859581		19.6011	0.869092		19.6011	0.82267		19.601	0.862352		19.6011	0.829026		19.6011	0.868128		19.6011	0.831516		19.601	0.871422		19.601	0.835979		19.6011	0.867595		19.6011	0.844019		19.601	0.868315		19.601	0.855712		19.6011	0.865259		19.6011	0.8676		19.601	0.862988
19.6511	0.854832		19.6511	0.865556		19.6511	0.823154		19.651	0.865474		19.6511	0.829885		19.6511	0.866488		19.6511	0.833873		19.651	0.871655		19.651	0.836846		19.6511	0.867553		19.6511	0.842638		19.651	0.869623		19.651	0.855542		19.6511	0.865661		19.6511	0.865521		19.651	0.863762
19.7011	0.857073		19.7011	0.866353		19.7011	0.824146		19.701	0.865047		19.7011	0.82707		19.7011	0.866715		19.7011	0.834029		19.701	0.873054		19.701	0.836544		19.7011	0.868825		19.7011	0.843171		19.701	0.869221		19.701	0.853574		19.7011	0.865024		19.7011	0.867968		19.701	0.861031
19.7511	0.85675		19.7511	0.867008		19.7511	0.819636		19.751	0.8677		19.7511	0.828188		19.7511	0.866272		19.7511	0.829575		19.751	0.873144		19.751	0.83847		19.7511	0.865928		19.7511	0.842811		19.751	0.868513		19.751	0.854065		19.7511	0.865996		19.7511	0.864422		19.751	0.86186
19.8011	0.855403		19.8011	0.868129		19.8011	0.823639		19.801	0.863994		19.8011	0.828287		19.8011	0.867595		19.8011	0.829958		19.801	0.871168		19.801	0.839081		19.8011	0.865557		19.8011	0.845982		19.801	0.869078		19.801	0.85669		19.8011	0.869132		19.8011	0.866251		19.801	0.863079
19.8511	0.860491		19.8511	0.866784		19.8511	0.825725		19.851	0.863832		19.8511	0.828229		19.8511	0.867956		19.8511	0.836118		19.851	0.873228		19.851	0.835157		19.8511	0.869716		19.8511	0.844273		19.851	0.867809		19.851	0.855867		19.8511	0.867601		19.8511	0.865407		19.8511	0.862392
19.9011	0.855726		19.9011	0.86675		19.9011	0.822897		19.901	0.861416		19.9011	0.82525		19.9011	0.864275		19.9011	0.831395		19.901	0.872578		19.901	0.835034		19.9011	0.865869		19.9011	0.846277		19.901	0.869588		19.901	0.857826		19.9011	0.867242		19.9011	0.864885		19.9011	0.862154
19.9511	0.857985		19.9511	0.867294		19.9511	0.822375		19.951	0.862602		19.9511	0.829649		19.9511	0.867772		19.9511	0.833108		19.951	0.871915		19.951	0.838208		19.9511	0.863249		19.9511	0.845692		19.9511	0.868061		19.951	0.854323		19.9511	0.867018		19.9511	0.869405		19.9511	0.863764
20.0011	0.857052		20.0011	0.86729		20.0011	0.821891		20.001	0.862409		20.0011	0.826561		20.0011	0.866807		20.0011	0.833583		20.001	0.871722		20.001	0.836629		20.0011	0.865641		20.0011	0.845727		20.0011	0.867163		20.001	0.854224		20.0011	0.86705		20.0011	0.866683		20.0011	0.86387
20.0511	0.855687		20.0511	0.864806		20.0511	0.824767		20.051	0.861114		20.0511	0.826257		20.0511	0.867018		20.0511	0.833682		20.051	0.873608		20.051	0.837249		20.0511	0.867456		20.0511	0.843213		20.0511	0.8682		20.051	0.854235		20.0511	0.866182		20.0511	0.865554		20.0511	0.862491
20.1011	0.855467		20.1011	0.867942		20.1011	0.822951		20.101	0.86349		20.1011	0.83006		20.1011	0.867998		20.1011	0.834918		20.1011	0.871968		20.101	0.83714		20.1011	0.867604		20.1011	0.844297		20.1011	0.868527		20.1011	0.855319		20.1011	0.867573		20.1011	0.86729		20.1011	0.861666
20.1511	0.854287		20.1511	0.866169		20.1511	0.822065		20.151	0.864195		20.1511	0.826758		20.1511	0.869326		20.1511	0.836316		20.1511	0.871528		20.151	0.839102		20.1511	0.866875		20.1511	0.846546		20.1511	0.868438		20.1511	0.853114		20.1511	0.86555		20.1511	0.866939		20.1511	0.861303
20.2011	0.856204		20.2011	0.867401		20.2011	0.823055		20.2011	0.861676		20.2011	0.82666		20.2011	0.865778		20.2011	0.831851		20.2011	0.871332		20.2011	0.83782		20.2011	0.86685		20.2011	0.845673		20.2011	0.870026		20.2011	0.855586		20.2011	0.867878		20.2011	0.867774		20.2011	0.860196
20.2511	0.857574		20.2511	0.86669		20.2511	0.825947		20.2511	0.866344		20.2511	0.828233		20.2511	0.864025		20.2511	0.834152		20.2511	0.870565		20.2511	0.837018		20.2511	0.867121		20.2511	0.845235		20.2511	0.86898		20.2511	0.854644		20.2511	0.865918		20.2511	0.86801		20.2511	0.863065
20.3011	0.855694		20.3011	0.867198		20.3011	0.823154		20.3011	0.864238		20.3011	0.828716		20.3011	0.868116		20.3011	0.831824		20.3011	0.870401		20.3011	0.837856		20.3011	0.866518		20.3011	0.845596		20.3011	0.867722		20.3011	0.855812		20.3011	0.866005		20.3011	0.865531		20.3011	0.860092
20.3511	0.858618		20.3511	0.866679		20.3511	0.821864		20.3511	0.866641		20.3512	0.828012		20.3511	0.867433		20.3511	0.83308		20.3511	0.870168		20.3511	0.836694		20.3511	0.86941		20.3511	0.8441		20.3511	0.867792		20.3511	0.855823		20.3511	0.870017		20.3511	0.866125		20.3511	0.862275
20.4012	0.856388		20.4011	0.865856		20.4011	0.822927		20.4011	0.864008		20.4012	0.829877		20.4011	0.866888		20.4011	0.833219		20.4011	0.869177		20.4011	0.837296		20.4011	0.868286		20.4011	0.843844		20.4011	0.867856		20.4011	0.854133		20.4011	0.869278		20.4011	0.867884		20.4011	0.861153
20.4512	0.856963		20.4511	0.86526		20.4511	0.823891		20.4511	0.863838		20.4512	0.825451		20.4511	0.868024		20.4511	0.832413		20.4511	0.871349		20.4511	0.837481		20.4511	0.865652		20.4511	0.843973		20.4511	0.868171		20.4511	0.854643		20.4511	0.866679		20.4511	0.868375		20.4511	0.861931
20.5012	0.856322		20.5011	0.867899		20.5011	0.825117		20.5011	0.865098		20.5012	0.828016		20.5011	0.864575		20.5011	0.832752		20.5011	0.869254		20.5011	0.838991		20.5011	0.866173		20.5011	0.845859		20.5011	0.867136		20.5011	0.857182		20.5011	0.866237		20.5011	0.86598		20.5011	0.860905
20.5512	0.857367		20.5511	0.866663		20.5511	0.823492		20.5511	0.862521		20.5512	0.826359		20.5511	0.865775		20.5511	0.834288		20.5511	0.8699		20.5511	0.837448		20.5511	0.867703		20.5511	0.843893		20.5511	0.86899		20.5511	0.853454		20.5511	0.867715		20.5511	0.867752		20.5511	0.861884
20.6012	0.856662		20.6011	0.869581		20.6011	0.821252		20.6011	0.864249		20.6012	0.827987		20.6011	0.867996		20.6011	0.833421		20.6011	0.870804		20.6011	0.835394		20.6011	0.866104		20.6011	0.844593		20.6011	0.864145		20.6011	0.851604		20.6011	0.867015		20.6011	0.865671		20.6011	0.862288
20.6512	0.857872		20.6511	0.8687		20.6511	0.818678		20.6511	0.865153		20.6512	0.831893		20.6511	0.866319		20.6511	0.8334		20.6511	0.872441		20.6511	0.836472		20.6511	0.86497		20.6511	0.844003		20.6511	0.866424		20.6511	0.855559		20.6511	0.867622		20.6511	0.867793		20.6511	0.859154
20.7012	0.856065		20.7011	0.86608		20.7011	0.821383		20.7011	0.862833		20.7012	0.830867		20.7011	0.865638		20.7011	0.831314		20.7011	0.869002		20.7011	0.835262		20.7011	0.866637		20.7011	0.846143		20.7011	0.867797		20.7011	0.857317		20.7011	0.867174		20.7011	0.865153		20.7011	0.864321
20.7512	0.854503		20.7511	0.868704		20.7511	0.823867		20.7511	0.866269		20.7512	0.830965		20.7511	0.866802		20.7511	0.833135		20.7511	0.869506		20.7511	0.834396		20.7511	0.864773		20.7511	0.844677		20.7511	0.867581		20.7511	0.85348		20.7511	0.864722		20.7511	0.867561		20.7511	0.86249
20.8012	0.855281		20.8011	0.866106		20.8011	0.823463		20.8011	0.862938		20.8012	0.828826		20.8011	0.864134		20.8011	0.834715		20.8011	0.871082		20.8011	0.835601		20.8011	0.866349		20.8011	0.84673		20.8011	0.867764		20.8011	0.854825		20.8012	0.862932		20.8011	0.866708		20.8011	0.863035
20.8512	0.85577		20.8511	0.865216		20.8511	0.824363		20.8511	0.861905		20.8512	0.826643		20.8511	0.865708		20.8511	0.832119		20.8511	0.871512		20.8511	0.837127		20.8511	0.864914		20.8511	0.846124		20.8511	0.87063		20.8511	0.85477		20.8512	0.865156		20.8511	0.866335		20.8511	0.86207
20.9012	0.857471		20.9011	0.865707		20.9011	0.823055		20.9011	0.861414		20.9012	0.827781		20.9011	0.868292		20.9011	0.832786		20.9011	0.870665		20.9011	0.833697		20.9011	0.866317		20.9011	0.846		20.9011	0.866872		20.9011	0.854084		20.9012	0.865948		20.9012	0.867562		20.9011	0.863016
20.9512	0.854437		20.9511	0.869889		20.9511	0.824753		20.9511	0.862885		20.9512	0.826502		20.9511	0.865106		20.9511	0.832287		20.9511	0.872501		20.9511	0.839063		20.9512	0.866381		20.9511	0.846881		20.9511	0.865817		20.9511	0.853667		20.9512	0.865754		20.9512	0.866256		20.9511	0.863211
21.0012	0.857568		21.0011	0.866335		21.0011	0.824271		21.0011	0.867235		21.0012	0.825663		21.0012	0.866039		21.0011	0.833957		21.0011	0.871114		21.0011	0.838321		21.0012	0.866421		21.0012	0.84524		21.0011	0.870289		21.0011	0.855914		21.0012	0.865991		21.0012	0.870444		21.0011	0.862537
21.0512	0.864312		21.0511	0.875878		21.0511	0.83081		21.0511	0.873758		21.0512	0.836963		21.0511	0.873193		21.0511	0.838861		21.0511	0.88102		21.0511	0.845201		21.0512	0.874999		21.0512	0.851823		21.0511	0.874714		21.0511	0.864436		21.0512	0.874987		21.0512	0.875		21.0511	0.870082
21.1012	0.875846		21.1011	0.884072		21.1011	0.84094		21.1011	0.883995		21.1012	0.847361		21.1012	0.884821		21.1011	0.851767		21.1011	0.888783		21.1011	0.855446		21.1012	0.885624		21.1012	0.862474		21.1011	0.886974		21.1011	0.877158		21.1012	0.886326		21.1012	0.885946		21.1011	0.881299
21.1512	0.879175		21.1511	0.892682		21.1511	0.848204		21.1511	0.888243		21.1512	0.855548		21.1512	0.894443		21.1511	0.85835		21.1511	0.89571		21.1511	0.857759		21.1512	0.889609		21.1512	0.868488		21.1511	0.8935		21.1511	0.879971		21.1512	0.889949		21.1512	0.894415		21.1511	0.887446
21.2012	0.881631		21.2012	0.89861		21.2011	0.850453		21.2011	0.894519		21.2012	0.857154		21.2012	0.899663		21.2012	0.860219		21.2011	0.902084		21.2011	0.865911		21.2012	0.896125		21.2012	0.873937		21.2011	0.90043		21.2011	0.882576		21.2012	0.894568		21.2012	0.897918		21.2011	0.892375
21.2512	0.888278		21.2512	0.901464		21.2511	0.855558		21.2511	0.895618		21.2512	0.861486		21.2512	0.900662		21.2512	0.865951		21.2511	0.904569		21.2511	0.871074		21.2512	0.900943		21.2512	0.873553		21.2511	0.902467		21.2511	0.887774		21.2512	0.899327		21.2512	0.9004		21.2511	0.892449
21.3012	0.889318		21.3012	0.903194		21.3012	0.858329		21.3011	0.897316		21.3012	0.861758		21.3012	0.901438		21.3012	0.865474		21.3011	0.907337		21.3011	0.873113		21.3012	0.904203		21.3012	0.876588		21.3011	0.902868		21.3011	0.892418		21.3012	0.901163		21.3012	0.901632		21.3011	0.894814
21.3512	0.894652		21.3512	0.903463		21.3512	0.857814		21.3511	0.901074		21.3512	0.866645		21.3512	0.905071		21.3512	0.868204		21.3511	0.908646		21.3511	0.873014		21.3512	0.899876		21.3512	0.877891		21.3511	0.907324		21.3511	0.893423		21.3512	0.902576		21.3512	0.904312		21.3511	0.896451
21.4012	0.894134		21.4012	0.906877		21.4012	0.859878		21.4011	0.903916		21.4012	0.868231		21.4012	0.906097		21.4012	0.871568		21.4011	0.90982		21.4011	0.876437		21.4012	0.906606		21.4012	0.882172		21.4011	0.90901		21.4011	0.89282		21.4012	0.905433		21.4012	0.905268		21.4011	0.900236
21.4512	0.893581		21.4512	0.908354		21.4512	0.861792		21.4511	0.90314		21.4512	0.869893		21.4512	0.90592		21.4512	0.874517		21.4511	0.914769		21.4511	0.876267		21.4512	0.908312		21.4512	0.880495		21.4511	0.907442		21.4511	0.89313		21.4512	0.905554		21.4512	0.907656		21.4511	0.899508
21.5012	0.896115		21.5012	0.909435		21.5012	0.868459		21.5011	0.905317		21.5012	0.870337		21.5012	0.911363		21.5012	0.872822		21.5011	0.915283		21.5011	0.877491		21.5012	0.909132		21.5012	0.883335		21.5011	0.910745		21.5011	0.897687		21.5012	0.912428		21.5012	0.90755		21.5011	0.901263
21.5512	0.898313		21.5512	0.909341		21.5512	0.869487		21.5511	0.907356		21.5512	0.873065		21.5512	0.91218		21.5512	0.875841		21.5511	0.916424		21.5511	0.879013		21.5512	0.910861		21.5512	0.887348		21.5511	0.913009		21.5511	0.898036		21.5512	0.912526		21.5512	0.912273		21.5511	0.904271
21.6012	0.89843		21.6012	0.911526		21.6012	0.870868		21.6011	0.904538		21.6012	0.874675		21.6012	0.910152		21.6012	0.875505		21.6011	0.916537		21.6011	0.879318		21.6012	0.913136		21.6012	0.890592		21.6011	0.910762		21.6011	0.899969		21.6012	0.912166		21.6012	0.913356		21.6011	0.906792
21.6512	0.901271		21.6512	0.912341		21.6512	0.871595		21.6511	0.908391		21.6512	0.874261		21.6512	0.913014		21.6512	0.877347		21.6511	0.917107		21.6511	0.882633		21.6512	0.915345		21.6512	0.887708		21.6511	0.915067		21.6511	0.899668		21.6512	0.910742		21.6512	0.910325		21.6512	0.905354
21.7012	0.898968		21.7012	0.913959		21.7012	0.875963		21.7011	0.911179		21.7012	0.876744		21.7012	0.914329		21.7012	0.883243		21.7011	0.919425		21.7011	0.884749		21.7012	0.914271		21.7012	0.892215		21.7011	0.911935		21.7011	0.901864		21.7012	0.914358		21.7012	0.912776		21.7012	0.910854
21.7512	0.902549		21.7512	0.914888		21.7512	0.872812		21.7511	0.913582		21.7512	0.880936		21.7512	0.916498		21.7512	0.880756		21.7511	0.921212		21.7511	0.885177		21.7512	0.915522		21.7512	0.893585		21.7511	0.91689		21.7511	0.900666		21.7512	0.914484		21.7512	0.91661		21.7512	0.907612
21.8012	0.902872		21.8012	0.913514		21.8012	0.877757		21.8011	0.913017		21.8012	0.878689		21.8012	0.918139		21.8012	0.88102		21.8011	0.919762		21.8011	0.885795		21.8012	0.915753		21.8012	0.890979		21.8012	0.917694		21.8011	0.906196		21.8012	0.915941		21.8012	0.916053		21.8012	0.911838
21.8512	0.902116		21.8512	0.917295		21.8512	0.874324		21.8511	0.916177		21.8512	0.880299		21.8512	0.919055		21.8512	0.88344		21.8511	0.921974		21.8511	0.888394		21.8512	0.915646		21.8512	0.896392		21.8512	0.920821		21.8511	0.905899		21.8512	0.914539		21.8512	0.914314		21.8512	0.910845
21.9012	0.903707		21.9012	0.919768		21.9012	0.881956		21.9011	0.916657		21.9012	0.885623		21.9012	0.919798		21.9012	0.886626		21.9012	0.922705		21.9011	0.89015		21.9012	0.915956		21.9012	0.895171		21.9012	0.92064		21.9012	0.906081		21.9012	0.918642		21.9012	0.917387		21.9012	0.911462
21.9512	0.907606		21.9512	0.92118		21.9512	0.879551		21.9511	0.919087		21.9512	0.885415		21.9512	0.91944		21.9512	0.890016		21.9512	0.927126		21.9511	0.891061		21.9512	0.917061		21.9512	0.897925		21.9512	0.923426		21.9512	0.905454		21.9512	0.91888		21.9512	0.920689		21.9512	0.914221
21.9912	0.907606		21.9912	0.92118		21.9912	0.879551		21.9911	0.919087		21.9912	0.885415		21.9912	0.91944		21.9912	0.890016		21.9912	0.927126		21.9911	0.891061		21.9912	0.917061		21.9912	0.897925		21.9912	0.923426		21.9912	0.905454		21.9912	0.91888		21.9912	0.920689		21.9912	0.914221
