# Supplementary material for: Binding and sequestration of poison frog alkaloids by a plasma globulin
Source: eLife journal article supplement (doi:10.7554/elife.85096), 2023-12-14
Supplement: fig5-data1 [file OsABG_mut3_analysis_BleachingRateRawData.xlsx]

## Sheet: RawData
NanoTemper Technologies	NanoTemper Technologies
MO.Affinity Analysis v3.0.5	MO.Affinity Analysis v3.0.5
Origin of exported data	Origin of exported data
Project Title:	OsABG_mut3
Comment:
Project File Path:	C:\Users\nanotemper\Desktop\Aurora_MST\20230125_OsABGmut3_PTX\OsABG_mut3_analysis.nta3
Analysis-Set Name:	Analysis-Set #2
Exported from:	Photobleaching Rate (Raw Data Inspection)
Exported on:	2023-03-11 17:54:21
Sample Information	Sample Information			Sample Information	Sample Information			Sample Information	Sample Information
Merge-Set Name:	Experiment 7 (#07)			Merge-Set Name:	OsABGm3+PTX (#08)			Merge-Set Name:	OsABGm3+PTX (#09)
Run Name:	Experiment 7 (#07)			Run Name:	OsABGm3+PTX (#08)			Run Name:	OsABGm3+PTX (#09)
Date of Measurement:	2023-03-11 16:53:48			Date of Measurement:	2023-03-11 17:11:20			Date of Measurement:	2023-03-11 17:28:45
Capillary Type:	Monolith Premium Capillary			Capillary Type:	Monolith Premium Capillary			Capillary Type:	Monolith Premium Capillary
Capillary Position:	1			Capillary Position:	1			Capillary Position:	1
Ligand:	MyLigand			Ligand:	PTX			Ligand:	PTX
Ligand Concentration:	0.005			Ligand Concentration:	0.005			Ligand Concentration:	0.005
Target:	OsABGm3			Target:	OsABGm3			Target:	OsABGm3
TargetConcentration:	5e-09			TargetConcentration:	5e-09			TargetConcentration:	5e-09
Measurement Settings	Measurement Settings			Measurement Settings	Measurement Settings			Measurement Settings	Measurement Settings
MST-Power:	Medium			MST-Power:	Medium			MST-Power:	Medium
Excitation-Power:	20			Excitation-Power:	15			Excitation-Power:	15
Excitation type:	Pico - RED			Excitation type:	Pico - RED			Excitation type:	Pico - RED
Thermostat Setpoint:	25			Thermostat Setpoint:	25			Thermostat Setpoint:	25
Photobleaching Rates of Capillary Index	Photobleaching Rates of Capillary Index	Photobleaching Rates of Capillary Index		Photobleaching Rates of Capillary Index	Photobleaching Rates of Capillary Index	Photobleaching Rates of Capillary Index		Photobleaching Rates of Capillary Index	Photobleaching Rates of Capillary Index	Photobleaching Rates of Capillary Index
Capillary Index	Ligand Concentration[-]	Photobleaching Rate		Capillary Index	Ligand Concentration[-]	Photobleaching Rate		Capillary Index	Ligand Concentration[-]	Photobleaching Rate
1	0.005	1.28068		1	0.005	0.936201		1	0.005	0.76198
2	0.0025	0.362872		2	0.0025	0.952548		2	0.0025	0.191614
3	0.00125	0.372129		3	0.00125	0.18403		3	0.00125	0.129582
4	0.000625	0.49451		4	0.000625	0.422699		4	0.000625	0.0395626
5	0.0003125	0.513409		5	0.0003125	0.220994		5	0.0003125	0.168928
6	0.00015625	0.715344		6	0.00015625	0.864738		6	0.00015625	0.505221
7	7.8125e-05	0.607909		7	7.8125e-05	0.276493		7	7.8125e-05	0.495134
8	3.90625e-05	0.621878		8	3.90625e-05	0.15144		8	3.90625e-05	0.476591
9	1.95313e-05	0.71381		9	1.95313e-05	-0.265828		9	1.95313e-05	0.434852
10	9.76563e-06	0.631949		10	9.76563e-06	0.274156		10	9.76563e-06	0.398623
11	4.88281e-06	0.867557		11	4.88281e-06	0.621018		11	4.88281e-06	0.538576
12	2.44141e-06	0.57683		12	2.44141e-06	0.487888		12	2.44141e-06	0.580612
13	1.2207e-06	0.301195		13	1.2207e-06	0.262707		13	1.2207e-06	0.648582
14	6.10352e-07	1.02655		14	6.10352e-07	0.526019		14	6.10352e-07	0.15725
15	3.05176e-07	0.554038		15	3.05176e-07	0.64203		15	3.05176e-07	0.0808718
16	1.52588e-07	0.445373		16	1.52588e-07	0.591107		16	1.52588e-07	0.591606
