# Supplementary material for: Binding and sequestration of poison frog alkaloids by a plasma globulin
Source: eLife journal article supplement (doi:10.7554/elife.85096), 2023-12-14
Supplement: fig5-data1 [file OsABG_mut3_analysis_CapillaryScanRawData_outliersexcluded.xlsx]

## Sheet: RawData
NanoTemper Technologies	NanoTemper Technologies
MO.Affinity Analysis v3.0.5	MO.Affinity Analysis v3.0.5
Origin of exported data	Origin of exported data
Project Title:	OsABG_mut3
Comment:
Project File Path:	C:\Users\nanotemper\Desktop\Aurora_MST\20230125_OsABGmut3_PTX\OsABG_mut3_analysis.nta3
Analysis-Set Name:	Analysis-Set #2
Exported from:	Capillary Scan (Raw Data Inspection)
Exported on:	2023-03-11 17:56:29
Sample Information	Sample Information		Sample Information	Sample Information		Sample Information	Sample Information		Sample Information	Sample Information		Sample Information	Sample Information		Sample Information	Sample Information		Sample Information	Sample Information		Sample Information	Sample Information		Sample Information	Sample Information		Sample Information	Sample Information		Sample Information	Sample Information		Sample Information	Sample Information		Sample Information	Sample Information		Sample Information	Sample Information		Sample Information	Sample Information		Sample Information	Sample Information		Sample Information	Sample Information
Merge-Set Name:	Experiment 7 (#07)		Merge-Set Name:	Experiment 7 (#07)		Merge-Set Name:	Experiment 7 (#07)		Merge-Set Name:	Experiment 7 (#07)		Merge-Set Name:	Experiment 7 (#07)		Merge-Set Name:	Experiment 7 (#07)		Merge-Set Name:	Experiment 7 (#07)		Merge-Set Name:	Experiment 7 (#07)		Merge-Set Name:	Experiment 7 (#07)		Merge-Set Name:	Experiment 7 (#07)		Merge-Set Name:	Experiment 7 (#07)		Merge-Set Name:	Experiment 7 (#07)		Merge-Set Name:	Experiment 7 (#07)		Merge-Set Name:	Experiment 7 (#07)		Merge-Set Name:	Experiment 7 (#07)		Merge-Set Name:	Experiment 7 (#07)		Merge-Set Name:	OsABGm3+PTX (#08)
Run Name:	Experiment 7 (#07)		Run Name:	Experiment 7 (#07)		Run Name:	Experiment 7 (#07)		Run Name:	Experiment 7 (#07)		Run Name:	Experiment 7 (#07)		Run Name:	Experiment 7 (#07)		Run Name:	Experiment 7 (#07)		Run Name:	Experiment 7 (#07)		Run Name:	Experiment 7 (#07)		Run Name:	Experiment 7 (#07)		Run Name:	Experiment 7 (#07)		Run Name:	Experiment 7 (#07)		Run Name:	Experiment 7 (#07)		Run Name:	Experiment 7 (#07)		Run Name:	Experiment 7 (#07)		Run Name:	Experiment 7 (#07)		Run Name:	OsABGm3+PTX (#08)
Date of Measurement:	2023-03-11 16:53:48		Date of Measurement:	2023-03-11 16:54:14		Date of Measurement:	2023-03-11 16:54:41		Date of Measurement:	2023-03-11 16:55:08		Date of Measurement:	2023-03-11 16:55:35		Date of Measurement:	2023-03-11 16:56:01		Date of Measurement:	2023-03-11 16:56:28		Date of Measurement:	2023-03-11 16:56:54		Date of Measurement:	2023-03-11 16:57:21		Date of Measurement:	2023-03-11 16:57:48		Date of Measurement:	2023-03-11 16:58:15		Date of Measurement:	2023-03-11 16:58:41		Date of Measurement:	2023-03-11 16:59:08		Date of Measurement:	2023-03-11 16:59:34		Date of Measurement:	2023-03-11 17:00:01		Date of Measurement:	2023-03-11 17:00:28		Date of Measurement:	2023-03-11 17:11:20
Capillary Type:	Monolith Premium Capillary		Capillary Type:	Monolith Premium Capillary		Capillary Type:	Monolith Premium Capillary		Capillary Type:	Monolith Premium Capillary		Capillary Type:	Monolith Premium Capillary		Capillary Type:	Monolith Premium Capillary		Capillary Type:	Monolith Premium Capillary		Capillary Type:	Monolith Premium Capillary		Capillary Type:	Monolith Premium Capillary		Capillary Type:	Monolith Premium Capillary		Capillary Type:	Monolith Premium Capillary		Capillary Type:	Monolith Premium Capillary		Capillary Type:	Monolith Premium Capillary		Capillary Type:	Monolith Premium Capillary		Capillary Type:	Monolith Premium Capillary		Capillary Type:	Monolith Premium Capillary		Capillary Type:	Monolith Premium Capillary
Capillary Position:	1		Capillary Position:	9		Capillary Position:	2		Capillary Position:	10		Capillary Position:	3		Capillary Position:	11		Capillary Position:	4		Capillary Position:	12		Capillary Position:	5		Capillary Position:	13		Capillary Position:	6		Capillary Position:	14		Capillary Position:	7		Capillary Position:	15		Capillary Position:	8		Capillary Position:	16		Capillary Position:	1
Ligand:	MyLigand		Ligand:	MyLigand		Ligand:	MyLigand		Ligand:	MyLigand		Ligand:	MyLigand		Ligand:	MyLigand		Ligand:	MyLigand		Ligand:	MyLigand		Ligand:	MyLigand		Ligand:	MyLigand		Ligand:	MyLigand		Ligand:	MyLigand		Ligand:	MyLigand		Ligand:	MyLigand		Ligand:	MyLigand		Ligand:	MyLigand		Ligand:	PTX
Ligand Concentration:	0.005		Ligand Concentration:	1.95313e-05		Ligand Concentration:	0.0025		Ligand Concentration:	9.76563e-06		Ligand Concentration:	0.00125		Ligand Concentration:	4.88281e-06		Ligand Concentration:	0.000625		Ligand Concentration:	2.44141e-06		Ligand Concentration:	0.0003125		Ligand Concentration:	1.2207e-06		Ligand Concentration:	0.00015625		Ligand Concentration:	6.10352e-07		Ligand Concentration:	7.8125e-05		Ligand Concentration:	3.05176e-07		Ligand Concentration:	3.90625e-05		Ligand Concentration:	1.52588e-07		Ligand Concentration:	0.005
Target:	OsABGm3		Target:	OsABGm3		Target:	OsABGm3		Target:	OsABGm3		Target:	OsABGm3		Target:	OsABGm3		Target:	OsABGm3		Target:	OsABGm3		Target:	OsABGm3		Target:	OsABGm3		Target:	OsABGm3		Target:	OsABGm3		Target:	OsABGm3		Target:	OsABGm3		Target:	OsABGm3		Target:	OsABGm3		Target:	OsABGm3
TargetConcentration:	5e-09		TargetConcentration:	5e-09		TargetConcentration:	5e-09		TargetConcentration:	5e-09		TargetConcentration:	5e-09		TargetConcentration:	5e-09		TargetConcentration:	5e-09		TargetConcentration:	5e-09		TargetConcentration:	5e-09		TargetConcentration:	5e-09		TargetConcentration:	5e-09		TargetConcentration:	5e-09		TargetConcentration:	5e-09		TargetConcentration:	5e-09		TargetConcentration:	5e-09		TargetConcentration:	5e-09		TargetConcentration:	5e-09
Measurement Settings	Measurement Settings		Measurement Settings	Measurement Settings		Measurement Settings	Measurement Settings		Measurement Settings	Measurement Settings		Measurement Settings	Measurement Settings		Measurement Settings	Measurement Settings		Measurement Settings	Measurement Settings		Measurement Settings	Measurement Settings		Measurement Settings	Measurement Settings		Measurement Settings	Measurement Settings		Measurement Settings	Measurement Settings		Measurement Settings	Measurement Settings		Measurement Settings	Measurement Settings		Measurement Settings	Measurement Settings		Measurement Settings	Measurement Settings		Measurement Settings	Measurement Settings		Measurement Settings	Measurement Settings
MST-Power:	Medium		MST-Power:	Medium		MST-Power:	Medium		MST-Power:	Medium		MST-Power:	Medium		MST-Power:	Medium		MST-Power:	Medium		MST-Power:	Medium		MST-Power:	Medium		MST-Power:	Medium		MST-Power:	Medium		MST-Power:	Medium		MST-Power:	Medium		MST-Power:	Medium		MST-Power:	Medium		MST-Power:	Medium		MST-Power:	Medium
Excitation-Power:	20		Excitation-Power:	20		Excitation-Power:	20		Excitation-Power:	20		Excitation-Power:	20		Excitation-Power:	20		Excitation-Power:	20		Excitation-Power:	20		Excitation-Power:	20		Excitation-Power:	20		Excitation-Power:	20		Excitation-Power:	20		Excitation-Power:	20		Excitation-Power:	20		Excitation-Power:	20		Excitation-Power:	20		Excitation-Power:	15
Excitation type:	Pico - RED		Excitation type:	Pico - RED		Excitation type:	Pico - RED		Excitation type:	Pico - RED		Excitation type:	Pico - RED		Excitation type:	Pico - RED		Excitation type:	Pico - RED		Excitation type:	Pico - RED		Excitation type:	Pico - RED		Excitation type:	Pico - RED		Excitation type:	Pico - RED		Excitation type:	Pico - RED		Excitation type:	Pico - RED		Excitation type:	Pico - RED		Excitation type:	Pico - RED		Excitation type:	Pico - RED		Excitation type:	Pico - RED
Thermostat Setpoint:	25		Thermostat Setpoint:	25		Thermostat Setpoint:	25		Thermostat Setpoint:	25		Thermostat Setpoint:	25		Thermostat Setpoint:	25		Thermostat Setpoint:	25		Thermostat Setpoint:	25		Thermostat Setpoint:	25		Thermostat Setpoint:	25		Thermostat Setpoint:	25		Thermostat Setpoint:	25		Thermostat Setpoint:	25		Thermostat Setpoint:	25		Thermostat Setpoint:	25		Thermostat Setpoint:	25		Thermostat Setpoint:	25
Included	Included		Included	Included		Included	Included		Included	Included		Included	Included		Included	Included		Included	Included		Included	Included		Included	Included		Included	Included		Included	Included		Included	Included		Included	Included		Outlier	Outlier		Included	Included		Outlier	Outlier		Included	Included
Position [capillary-index]	Raw Fluorescence [counts]		Position [capillary-index]	Raw Fluorescence [counts]		Position [capillary-index]	Raw Fluorescence [counts]		Position [capillary-index]	Raw Fluorescence [counts]		Position [capillary-index]	Raw Fluorescence [counts]		Position [capillary-index]	Raw Fluorescence [counts]		Position [capillary-index]	Raw Fluorescence [counts]		Position [capillary-index]	Raw Fluorescence [counts]		Position [capillary-index]	Raw Fluorescence [counts]		Position [capillary-index]	Raw Fluorescence [counts]		Position [capillary-index]	Raw Fluorescence [counts]		Position [capillary-index]	Raw Fluorescence [counts]		Position [capillary-index]	Raw Fluorescence [counts]		Position [capillary-index]	Raw Fluorescence [counts]		Position [capillary-index]	Raw Fluorescence [counts]		Position [capillary-index]	Raw Fluorescence [counts]		Position [capillary-index]	Raw Fluorescence [counts]
0.500827	102.124		8.50109	47.7679		1.50097	58.2895		9.50108	56.518		2.50031	47.41		10.5006	58.8532		3.5018	58.5221		11.501	46.3125		4.50078	55.9066		12.5014	46.7628		5.50033	45.9874		13.5006	42.4116		6.50014	43.2109		14.5006	51.5316		7.50023	46.7479		15.5	46.9716		0.501305	80.5257
0.502633	107.647		8.50234	50.7412		1.50257	54.8598		9.50219	46.4109		2.50114	48.5582		10.502	57.8899		3.50284	50.2283		11.502	52.7752		4.50196	55.4831		12.5025	47.7529		5.50207	42.17		13.5021	42.8321		6.5009	41.4125		14.5022	50.9828		7.50148	49.101		15.5017	52.2503		0.502416	82.2346
0.503883	102.022		8.50408	54.6362		1.50431	53.3746		9.50296	47.0282		2.50212	48.6417		10.5039	46.9239		3.50388	48.7729		11.5028	45.4476		4.50363	57.5737		12.5035	47.0312		5.5036	41.8062		13.504	47.5502		6.50222	52.4441		14.5032	39.6291		7.50224	35.7849		15.503	52.3517		0.503458	71.2328
0.504786	110.441		8.50568	47.917		1.50549	57.7855		9.50434	45.719		2.50378	46.903		10.5051	45.9546		3.50548	54.0397		11.5044	51.6658		4.50529	63.9738		12.5052	48.1466		5.50457	51.9789		13.5051	38.2393		6.50396	50.6488		14.5043	35.6238		7.50356	44.4485		15.5039	56.2794		0.504985	72.7717
0.506175	104.244		8.50665	52.2801		1.50639	64.1826		9.50608	42.8977		2.50538	53.3806		10.5059	42.9186		3.50721	47.8752		11.506	51.1588		4.50634	53.6937		12.5069	51.785		5.50568	52.7275		13.5059	35.9847		6.50528	47.8484		14.5059	43.5449		7.5053	45.5281		15.5053	53.3239		0.506721	75.3215
0.50798	99.4157		8.50776	42.51		1.50799	60.2877		9.5074	38.6032		2.50642	52.6738		10.5072	51.2035		3.50832	52.6947		11.5072	47.6396		4.50738	50.5295		12.5079	42.9872		5.50735	40.8936		13.5073	45.1017		6.50625	46.7091		14.5076	44.5231		7.50662	47.8036		15.507	53.813		0.507902	68.6918
0.509299	111.539		8.50949	41.4513		1.50979	58.8084		9.50837	37.6906		2.50746	51.0812		10.5089	52.3934		3.5093	47.9736		11.5082	49.3664		4.50904	49.2113		12.5087	39.477		5.50901	42.7725		13.509	53.4641		6.5075	51.9133		14.5088	38.5942		7.50752	51.5196		15.5085	48.6089		0.508805	83.0398
0.510202	92.9262		8.51109	41.9225		1.5109	62.2232		9.50969	46.2081		2.50906	57.69		10.5102	47.3056		3.51089	47.3414		11.5096	42.4921		4.51071	58.5788		12.5102	43.7537		5.51012	51.3228		13.5103	52.4859		6.50924	49.0294		14.5097	46.062		7.50877	46.7688		15.5095	45.7816		0.510333	91.4529
0.511591	99.8392		8.51213	40.4254		1.51167	59.1335		9.51143	49.2292		2.5108	49.4588		10.5112	43.6373		3.5127	48.7013		11.5114	46.8225		4.51175	54.9344		12.5119	50.3058		5.5111	52.9511		13.5112	43.9266		6.51076	41.8092		14.5113	47.4517		7.51051	39.5903		15.5107	46.5988		0.512138	84.1761
0.513397	93.7612		8.51318	45.1732		1.51306	56.8789		9.51289	48.8266		2.51198	60.8155		10.5125	44.5559		3.51374	44.5738		11.5127	48.5134		4.51272	61.579		12.513	41.6213		5.51262	51.4212		13.5126	51.5554		6.51174	34.2222		14.513	47.2012		7.5121	49.0234		15.5124	47.0223		0.513319	74.8205
0.514786	96.171		8.51484	51.2154		1.51479	60.8304		9.51386	54.1828		2.51295	61.5223		10.5142	46.1216		3.5145	52.5366		11.5136	57.3262		4.51439	52.0117		12.514	42.9395		5.51443	42.5279		13.5143	42.3848		6.51292	39.82		14.5142	47.7679		7.51308	46.3274		15.514	56.3719		0.514083	70.9495
0.51555	90.7879		8.51658	49.268		1.51604	54.3081		9.51504	49.3485		2.51441	55.3638		10.5157	43.6075		3.51596	61.2718		11.5149	48.931		4.51613	51.1021		12.5155	46.5063		5.51561	37.6936		13.5158	41.6392		6.51458	41.341		14.5151	39.9631		7.51412	41.5378		15.515	50.8009		0.515471	72.6762
0.51673	94.9631		8.51748	51.9103		1.51702	54.5407		9.51678	43.3451		2.51614	51.958		10.5167	39.0505		3.5177	57.529		11.5167	38.1558		4.51717	62.9091		12.5173	46.2976		5.51658	42.015		13.5167	54.5825		6.51625	53.9651		14.5166	40.8071		7.51585	48.5671		15.516	56.187		0.517208	80.5645
0.518466	108.563		8.51838	50.3028		1.51834	59.4496		9.51837	47.4458		2.51746	43.1721		10.5178	42.1671		3.51895	51.6449		11.5182	44.9704		4.518	66.816		12.5186	46.3363		5.51811	37.2611		13.5179	49.4529		6.51722	51.114		14.5184	43.7358		7.51752	50.7621		15.5178	47.6516		0.518527	80.8359
0.519924	119.928		8.51991	49.6676		1.52007	73.1504		9.51935	54.3498		2.51837	42.176		10.5195	51.4928		3.51992	40.2435		11.5191	41.3022		4.51946	65.0027		12.5195	46.3632		5.51992	41.4334		13.5196	44.9138		6.51826	47.2668		14.5196	50.9351		7.51849	50.7263		15.5195	46.1365		0.51943	66.4163
0.520897	109.329		8.52158	50.8337		1.52153	70.1711		9.52039	49.1636		2.51975	40.9085		10.5211	49.1099		3.52124	47.7887		11.5203	41.4662		4.5212	58.7488		12.5209	47.9945		5.5211	50.2641		13.5212	49.5036		6.52	54.0307		14.5204	47.6486		7.51953	50.8933		15.5204	52.6976		0.520749	70.4633
0.522008	90.1109		8.52269	52.3099		1.5225	63.5682		9.52212	38.9998		2.52163	43.4584		10.5222	55.0298		3.52298	58.9367		11.5222	44.374		4.52238	68.5934		12.5227	41.2217		5.52186	45.8651		13.5223	40.0526		6.52174	54.2962		14.5218	41.1769		7.52127	50.3327		15.5213	50.3714		0.522485	74.2002
0.523675	104.214		8.52373	45.8979		1.52368	48.257		9.52379	49.3962		2.52288	43.1065		10.5232	63.1775		3.52444	57.7646		11.5237	50.4191		4.52335	64.3436		12.5241	41.8778		5.52325	38.4869		13.5233	45.4208		6.52264	47.6187		14.5235	41.3708		7.52301	36.9182		15.5229	47.5651		0.523944	77.2929
0.525341	96.4334		8.52519	48.3256		1.52542	53.6878		9.52469	45.0927		2.52364	41.6899		10.525	51.5524		3.52541	54.1799		11.5245	41.3648		4.52474	62.2858		12.525	43.0916		5.52499	41.2187		13.5251	45.728		6.52354	50.4281		14.5248	45.0629		7.52391	44.2129		15.5246	52.2503		0.524916	91.8317
0.526383	102.115		8.52693	55.7664		1.52702	59.05		9.52566	39.313		2.52496	48.3166		10.5266	54.6362		3.52659	51.9729		11.5256	38.0902		4.52654	59.5898		12.5263	49.7839		5.52631	42.4444		13.5267	48.4448		6.52507	42.9574		14.5258	51.4659		7.52481	58.7965		15.5257	54.8956		0.526096	82.9831
0.527425	103.815		8.52824	54.2484		1.52799	52.7454		9.52726	50.0971		2.5267	52.2771		10.5276	53.9264		3.52839	49.256		11.5273	35.2123		4.52793	55.2684		12.5281	47.2251		5.52721	48.2749		13.5276	54.2365		6.52674	45.7488		14.527	47.9707		7.52634	55.4265		15.5267	57.6722		0.527763	80.8776
0.529022	116.418		8.52915	51.8835		1.5291	58.6742		9.52886	51.3347		2.52802	49.6199		10.5285	45.4894		3.52992	56.3838		11.5287	43.0319		4.52891	59.7121		12.5296	48.0929		5.52853	55.006		13.5285	47.9677		6.52785	52.9213		14.5288	52.1101		7.52801	47.6337		15.5282	58.1702		0.52936	79.7682
0.530758	106.269		8.53047	48.0184		1.53084	64.5434		9.52997	50.8605		2.52892	50.1686		10.53	53.5655		3.53089	55.0954		11.5298	44.365		4.53016	59.2319		12.5303	48.6805		5.53026	49.2739		13.5301	56.6611		6.52889	44.881		14.5303	51.6359		7.52912	41.335		15.53	62.8733		0.530402	90.6596
0.531869	101.626		8.53227	36.0026		1.5325	65.0653		9.53094	45.0748		2.53017	48.7341		10.5317	60.0699		3.53201	56.3301		11.5308	43.2377		4.53189	54.5735		12.5314	46.402		5.53179	43.7715		13.5318	46.3662		6.53035	49.5423		14.5313	52.5992		7.53009	42.4355		15.5312	55.1103		0.531444	80.2632
0.532772	104.331		8.53373	44.3382		1.5334	58.1762		9.53247	45.8383		2.53191	46.8761		10.5328	50.1835		3.53381	54.6749		11.5325	47.7082		4.53342	60.8364		12.5332	47.4338		5.53276	48.2599		13.5329	42.7904		6.53215	44.2249		14.5324	45.2985		7.53162	44.8869		15.5321	57.9942		0.53318	87.1405
0.534369	114.318		8.53463	43.8551		1.53438	61.2688		9.53421	40.7862		2.5335	54.8568		10.5338	42.0418		3.53534	53.9114		11.5342	46.1813		4.53432	72.1841		12.5346	48.6089		5.53394	51.2095		13.5339	50.1865		6.5334	38.3497		14.5342	41.1829		7.53335	47.7023		15.5335	44.711		0.534846	77.0751
0.536174	110.525		8.53588	52.0385		1.53597	57.5737		9.53553	47.1505		2.53448	46.566		10.5352	44.7706		3.53624	50.6995		11.5353	37.1418		4.53557	63.7471		12.5356	45.5281		5.53568	57.0369		13.5353	41.4215		6.53431	37.6399		14.5358	42.686		7.53467	42.6681		15.5353	38.7374		0.535819	71.698
0.537286	94.5426		8.53769	47.8036		1.53757	70.6602		9.53643	44.5708		2.53559	43.0558		10.537	48.6834		3.53728	49.426		11.5362	42.6681		4.53738	63.8217		12.5367	35.9042		5.53728	42.9961		13.5371	49.1218		6.53563	49.1457		14.5368	45.725		7.53558	40.8996		15.5367	48.7013		0.536721	85.3451
0.53805	89.4428		8.53915	45.5759		1.53861	64.2064		9.53782	43.5091		2.53725	46.8225		10.5384	45.4953		3.53888	56.2138		11.5378	47.4159		4.53891	59.8135		12.5384	29.1462		5.53825	54.0844		13.5385	41.5557		6.53743	53.6222		14.5379	41.9881		7.5369	50.0285		15.5376	53.1271		0.538249	80.2961
0.539508	99.1085		8.53991	51.1617		1.53965	51.1558		9.53962	46.5988		2.53892	48.3912		10.5392	45.7011		3.54041	46.399		11.5396	48.424		4.53974	52.972		12.54	44.2398		5.53929	59.9119		13.5394	44.6722		6.53889	43.2437		14.5396	54.8658		7.5387	44.2517		15.5389	41.6541		0.539916	72.0589
0.541244	101.104		8.54102	55.6561		1.54118	56.3182		9.54094	51.6538		2.53996	51.0932		10.5406	39.3935		3.54152	54.8837		11.5408	53.5357		4.54078	63.0314		12.5411	49.2501		5.54103	49.4916		13.5408	52.7483		6.53979	49.5811		14.5413	56.7029		7.54009	54.2455		15.5408	46.2618		0.541027	79.461
0.542425	115.947		8.54276	48.4985		1.54292	62.1128		9.54185	65.3248		2.541	54.9195		10.5424	34.7113		3.54256	57.7378		11.5417	45.6325		4.54245	60.0461		12.5421	50.0613		5.54269	53.0376		13.5426	42.8619		6.54104	42.5846		14.5422	45.6027		7.54106	56.9445		15.5421	49.1338		0.541999	79.2612
0.543397	112.46		8.54422	45.3283		1.54417	63.091		9.54316	53.5715		2.54267	49.8108		10.5438	37.3089		3.54409	46.5153		11.5433	46.1664		4.54397	52.4948		12.5437	48.8504		5.5436	52.629		13.5439	43.7507		6.54292	52.0833		14.5431	52.1787		7.54231	56.4912		15.5429	50.0732		0.543527	84.9634
0.544786	95.992		8.54526	47.1237		1.54507	53.4044		9.54497	43.8044		2.54441	49.5215		10.5447	49.2769		3.54582	50.3118		11.5451	51.114		4.54509	54.4572		12.5455	40.5506		5.5445	49.9539		13.5449	54.1978		6.54438	44.4306		14.5447	54.6481		7.54419	45.4864		15.5441	49.5871		0.545333	75.08
0.546522	92.4848		8.54637	54.1709		1.54653	53.7474		9.54636	51.4809		2.54538	54.9165		10.546	47.7589		3.54707	59.5838		11.5462	49.9807		4.54613	50.8933		12.5466	41.4931		5.5461	51.8835		13.5462	53.0913		6.54514	38.0902		14.5463	57.6304		7.54565	40.5506		15.5458	48.8892		0.546583	79.0644
0.54798	89.6218		8.54797	54.8181		1.54834	57.4813		9.54719	54.3737		2.54621	44.2577		10.5478	50.3386		3.54798	54.8449		11.547	47.6068		4.54773	52.471		12.5476	41.0397		5.54776	49.0473		13.548	52.4322		6.54625	47.237		14.5475	58.1255		7.54641	46.6465		15.5473	46.39		0.547485	79.0763
0.548952	104.029		8.5497	54.5437		1.54965	58.7667		9.5483	46.9119		2.54774	40.3777		10.5492	49.5781		3.54944	55.8649		11.5484	37.3506		4.54946	54.2842		12.5491	37.3506		5.54887	45.719		13.5494	57.5111		6.54799	44.4366		14.5485	50.5742		7.54752	47.8693		15.5483	52.1906		0.548874	76.4399
0.550133	105.282		8.55081	41.8032		1.55049	51.3347		9.55004	46.6853		2.54941	50.0195		10.55	42.3371		3.55124	49.3783		11.5501	40.3747		4.55064	57.4216		12.5509	43.1214		5.54985	50.4072		13.5501	50.4579		6.54945	44.5231		14.5499	44.5082		7.54919	46.4348		15.5494	47.5054		0.55068	78.0026
0.551869	94.9273		8.55179	45.6266		1.55188	56.0528		9.5515	37.3924		2.55059	47.5054		10.5511	40.0943		3.55256	53.4343		11.5514	42.3281		4.55161	60.8215		12.5521	42.8619		5.55137	48.8833		13.5513	47.6277		6.55049	41.2873		14.5518	44.9496		7.55064	51.6479		15.551	43.0946		0.551999	80.7017
0.553397	94.1609		8.55331	43.4286		1.55375	62.7749		9.55254	31.9317		2.55156	48.6834		10.5529	48.0601		3.55346	53.6132		11.5523	52.3815		4.55307	60.8155		12.5528	46.4318		5.55311	48.0452		13.553	49.7123		6.5516	39.984		14.5531	47.5233		7.55169	49.3127		15.5527	42.519		0.552902	64.8417
0.554369	94.7633		8.55512	43.858		1.55507	61.576		9.55365	41.2217		2.55302	52.9243		10.5543	51.5644		3.55485	47.0909		11.5536	56.1213		4.55481	53.2732		12.5542	41.4155		5.55436	47.8842		13.5544	46.5839		6.5532	40.1182		14.5539	46.7598		7.5528	45.1792		15.5537	50.8098		0.554291	75.2917
0.55548	109.144		8.5563	37.1806		1.55584	68.8678		9.55532	53.9949		2.55475	47.8991		10.5554	48.8057		3.55673	55.5189		11.5553	51.1289		4.55613	67.9522		12.5559	50.9411		5.55533	43.7059		13.5555	43.8372		6.55486	50.2879		14.5553	52.3547		7.5544	51.6837		15.5548	39.7216		0.556096	85.4495
0.557216	107.531		8.5572	42.8083		1.55709	70.0369		9.55698	50.8307		2.55614	45.6295		10.5565	51.3168		3.55798	57.7646		11.5568	44.4813		4.55703	73.5113		12.5573	54.3081		5.55672	51.0454		13.5566	42.7576		6.55597	59.3094		14.5571	46.4646		7.55613	52.4054		15.5564	36.5394		0.557485	69.6134
0.558883	114.354		8.55873	47.8931		1.55882	63.9768		9.55803	52.7931		2.55705	49.4439		10.5581	47.3802		3.55874	59.3303		11.5578	48.3703		4.55842	59.217		12.5582	41.1978		5.55846	46.7926		13.5583	48.7341		6.55695	46.6197		14.5585	52.1608		7.55724	48.5194		15.5581	40.157		0.558249	68.164
0.559786	109.639		8.56054	48.4329		1.56021	76.3385		9.55907	52.0028		2.5583	47.5203		10.5597	42.8232		3.55999	59.2558		11.559	42.7456		4.56023	64.8178		12.5595	45.8979		5.55985	53.6371		13.5599	58.7607		6.55854	44.8899		14.5594	51.9043		7.55814	46.5898		15.5592	51.5494		0.55943	71.2149
0.560758	89.3772		8.56165	51.9043		1.56118	49.3097		9.56059	53.2852		2.5601	46.2856		10.5609	38.4332		3.56173	61.3494		11.5607	39.8498		4.56147	62.092		12.5612	46.8583		5.56075	45.1375		13.561	49.5722		6.56028	42.2864		14.5607	55.3966		7.55974	39.0625		15.5602	51.4123		0.561166	81.155
0.562355	94.8647		8.56248	50.1955		1.56229	49.3097		9.56233	52.966		2.56156	42.2744		10.5619	37.449		3.56312	64.8804		11.5623	46.8791		4.56231	55.0895		12.5627	42.1074		5.56207	50.106		13.5621	48.0303		6.56146	45.6385		14.5625	61.4806		7.56148	39.7424		15.5618	41.1978		0.562624	85.7984
0.563952	102.037		8.56387	49.9509		1.56403	47.8186		9.56351	51.4212		2.56246	51.4242		10.5634	43.3153		3.56409	58.5728		11.5633	49.7451		4.56356	59.7985		12.5637	43.5479		5.56388	55.1879		13.5637	43.4047		6.56236	41.7018		14.5639	50.8993		7.56266	39.0446		15.5635	47.243		0.563596	81.3488
0.564994	106.466		8.56554	47.5024		1.56563	49.6706		9.56441	49.7779		2.56371	45.1971		10.5652	46.3006		3.56527	39.5038		11.5644	50.6398		4.56529	54.2783		12.5648	39.3339		5.56526	53.5237		13.5654	49.8286		6.56389	36.1577		14.5647	58.3163		7.56363	46.0828		15.5646	55.3847		0.564708	73.887
0.566036	117.193		8.56686	35.1675		1.56667	51.2124		9.56601	45.7846		2.56559	44.2189		10.5663	45.7011		3.56694	51.1021		11.5661	50.8784		4.56668	61.3792		12.5666	42.7904		5.5661	58.707		13.5665	50.1925		6.56576	42.0776		14.5658	57.1234		7.56516	45.7697		15.5654	45.9993		0.566374	80.0754
0.567563	109.296		8.56776	41.4453		1.56771	57.9078		9.56782	42.689		2.56705	39.8707		10.5672	49.93		3.5686	56.0021		11.5678	49.5513		4.56766	63.3296		12.5682	43.8252		5.56728	56.1571		13.5675	39.6291		6.56688	45.3611		14.5676	50.44		7.56696	41.1232		15.5669	42.3997		0.568041	67.997
0.5693	95.3419		8.56908	42.4504		1.56938	45.2299		9.56893	43.3689		2.56781	44.9018		10.5688	48.6417		3.56964	58.1851		11.5687	51.1468		4.56884	59.4794		12.5692	45.4327		5.56894	60.4576		13.569	41.9971		6.56771	49.5066		14.569	51.7522		7.56815	40.151		15.5686	48.7968		0.569083	66.1151
0.57055	91.3933		8.57081	42.8112		1.57104	47.8931		9.56969	41.7197		2.56892	45.1285		10.5706	43.7477		3.57069	57.195		11.5696	51.9282		4.57057	60.7768		12.5702	48.4091		5.5704	58.0807		13.5708	41.2962		6.5691	54.9553		14.5701	43.4435		7.56891	48.9817		15.5698	48.6268		0.570124	77.3137
0.571452	97.4623		8.57234	48.3733		1.57215	53.2732		9.57115	45.1553		2.57059	47.5651		10.5718	44.0847		3.57235	52.638		11.5712	47.5084		4.57217	60.0163		12.572	39.9005		5.57137	48.2659		13.5719	44.3591		6.57076	46.4258		14.5712	42.352		7.5703	46.7926		15.5708	46.894		0.571652	68.1908
0.572911	103.159		8.57331	55.7814		1.57313	58.1135		9.57289	49.2083		2.57212	53.98		10.5725	43.9565		3.57402	46.8821		11.5728	51.9163		4.57314	58.8114		12.5736	38.5555		5.57256	51.114		13.5728	42.3997		6.57208	42.5637		14.5729	47.4189		7.57196	44.4784		15.5721	53.2046		0.573388	76.7322
0.574647	110.596		8.57443	60.3234		1.57472	54.0844		9.57407	52.2682		2.57316	52.9571		10.5739	49.4708		3.57513	46.2856		11.574	51.2363		4.57425	53.0436		12.5746	51.8149		5.57422	47.3235		13.5742	39.9601		6.57306	49.608		14.5745	53.9353		7.57328	48.5791		15.5739	45.5073		0.574569	66.1897
0.575966	87.9338		8.57616	57.6602		1.57653	54.4363		9.57504	53.2195		2.5742	57.1294		10.5756	49.8764		3.57617	52.7304		11.5749	44.541		4.57592	60.1564		12.5755	50.5623		5.57589	44.3949		13.5758	35.2302		6.57438	51.114		14.5756	50.273		7.57426	46.8791		15.5753	37.2313		0.575472	65.0713
0.576869	98.9535		8.57776	43.8252		1.57757	52.1042		9.57636	53.4432		2.5758	63.8157		10.577	49.3694		3.57777	51.5494		11.5765	46.1127		4.57759	55.677		12.5771	42.856		5.577	50.7204		13.5771	38.6598		6.57611	45.5669		14.5766	58.7368		7.57551	45.0808		15.5763	37.2373		0.577069	83.7138
0.578258	98.7119		8.57873	39.7007		1.5784	48.7312		9.57816	49.0115		2.57753	53.9949		10.5779	56.5597		3.5795	46.9895		11.5782	46.7598		4.57863	55.2207		12.5787	47.0014		5.57797	45.7697		13.578	44.1414		6.57757	46.9567		14.5781	46.0381		7.57724	55.6591		15.5775	49.7302		0.578805	80.6241
0.580133	93.4004		8.57984	50.0762		1.57986	59.8284		9.57962	43.1423		2.57864	43.4345		10.5792	49.8853		3.58055	52.2831		11.5794	39.2325		4.57967	61.069		12.5798	54.3737		5.57957	49.3783		13.5794	43.9743		6.57854	43.2824		14.5799	44.2099		7.57877	47.9617		15.5793	50.6756		0.579916	72.5927
0.581383	104.453		8.58158	40.4373		1.5816	58.7667		9.58053	48.6208		2.57962	47.3414		10.5809	52.1489		3.58138	49.9539		11.5803	44.9406		4.58134	58.039		12.5808	52.4412		5.5813	47.5233		13.5812	49.5632		6.57972	40.5327		14.5811	50.9023		7.57974	46.8076		15.5808	41.4871		0.580749	75.6705
0.582147	108.956		8.58325	46.3214		1.58278	61.7997		9.58171	57.5081		2.58114	53.9592		10.5824	55.5875		3.58284	45.3015		11.5817	48.9668		4.58307	51.2959		12.5823	55.0358		5.58249	44.8273		13.5826	50.783		6.58146	47.3175		14.582	46.0083		7.58092	43.1423		15.5818	38.0604		0.582138	74.8175
0.583397	96.4632		8.58408	52.0594		1.58375	66.3418		9.58351	55.3072		2.58295	55.4533		10.5834	54.4334		3.58457	52.0177		11.5835	44.4634		4.58404	55.7247		12.584	54.9851		5.58339	51.7314		13.5835	36.8466		6.58306	49.2441		14.5836	55.2386		7.58259	38.806		15.583	41.171		0.583874	81.9095
0.585133	83.4215		8.58498	48.9548		1.58514	59.4794		9.58504	53.3239		2.5842	52.0684		10.5845	51.791		3.58576	52.2563		11.5849	42.5041		4.58488	51.6598		12.5853	44.9197		5.58499	48.0214		13.5848	42.3937		6.58403	41.0517		14.5854	54.0099		7.58419	43.6344		15.5847	45.4178		0.585124	83.7973
0.586522	103.352		8.58658	48.6119		1.58688	54.4393		9.58601	42.5041		2.5851	48.3584		10.5863	41.7615		3.58666	54.7018		11.5858	47.8991		4.58641	57.7437		12.5862	55.4145		5.58679	43.4017		13.5865	43.691		6.58507	40.7982		14.5865	53.3806		7.58523	49.5781		15.5863	39.5963		0.586097	87.8533
0.587494	104.906		8.58824	51.0037		1.58827	58.033		9.58712	50.6577		2.58656	50.6995		10.5879	35.2719		3.58812	57.7736		11.5871	48.7968		4.58807	46.3781		12.5876	51.0544		5.5879	39.7693		13.5881	47.9289		6.58681	39.8915		14.5873	51.3317		7.58627	57.2815		15.5872	37.8069		0.587416	86.6544
0.588675	98.6612		8.58936	49.9778		1.58924	61.2688		9.58886	55.2296		2.58837	45.2776		10.5888	45.5788		3.58992	46.6942		11.589	51.5375		4.58925	43.5091		12.5894	46.2528		5.58874	39.978		13.5891	51.12		6.58847	46.2797		14.5887	48.4419		7.58801	51.1468		15.5882	47.4458		0.589152	73.049
0.590341	101.986		8.59033	52.1757		1.59042	60.2012		9.59046	46.8523		2.58962	46.3692		10.5899	40.4492		3.59131	56.7655		11.5903	42.8083		4.59023	52.1936		12.5908	48.6268		5.59012	50.4609		13.5902	52.6231		6.58938	53.5208		14.5904	50.3714		7.58967	48.4687		15.5898	49.4409		0.59061	66.0525
0.591939	113.665		8.59186	54.1411		1.59215	53.6192		9.59136	39.4233		2.59038	41.2992		10.5916	40.1629		3.59221	62.9419		11.5912	44.7289		4.59168	57.8123		12.5917	42.9007		5.59186	54.1351		13.5919	47.905		6.59035	45.8353		14.5917	55.0924		7.59058	44.7647		15.5914	48.2092		0.591582	67.6212
0.59298	97.0597		8.59359	52.9362		1.59368	45.4118		9.59233	44.9227		2.5917	49.3306		10.5933	56.4226		3.59346	54.1202		11.5923	49.599		4.59342	57.9137		12.593	46.2618		5.59311	46.9388		13.5935	42.4623		6.59195	42.4504		14.5926	45.8443		7.59148	47.9557		15.5925	45.4387		0.592763	76.1805
0.594091	87.722		8.59484	53.476		1.59465	47.8335		9.59393	45.4178		2.59337	42.9812		10.5942	58.7249		3.59527	53.6729		11.594	45.9308		4.59481	59.2737		12.5948	53.7623		5.59408	44.9854		13.5944	53.1211		6.59354	47.2012		14.5939	46.9298		7.59308	51.6329		15.5935	39.3846		0.594499	72.4585
0.595688	96.9464		8.59581	49.4767		1.59577	49.4469		9.59546	58.4058		2.59468	46.3662		10.5951	49.6229		3.5968	50.1567		11.5954	36.0473		4.59571	62.6586		12.5962	45.6474		5.5954	40.9861		13.5954	43.0797		6.59465	40.5387		14.5957	42.9783		7.59474	49.7899		15.5951	48.8654		0.596027	66.7891
0.597355	103.871		8.5972	51.967		1.59757	55.5487		9.59657	59.6673		2.59566	43.184		10.5967	46.3662		3.5977	44.9018		11.5964	38.0753		4.59703	56.017		12.5971	39.4979		5.59721	45.3074		13.597	55.1282		6.59563	45.7727		14.5972	48.1705		7.59585	43.9893		15.5969	51.4391		0.596999	78.5753
0.598466	110.76		8.59901	51.7552		1.59917	56.4613		9.59754	52.9631		2.59698	39.1937		10.5984	59.0619		3.59888	44.3322		11.5976	44.8243		4.59877	50.8546		12.5982	39.9035		5.59867	48.6268		13.5986	49.1487		6.59715	49.9241		14.5981	53.1331		7.59683	44.702		15.5981	45.3134		0.59818	79.0584
0.599438	104.468		8.60033	50.2432		1.60007	51.5703		9.59907	47.3414		2.59871	48.3315		10.5994	45.9993		3.60069	39.8886		11.5992	44.8661		4.60029	54.4184		12.5999	41.5348		5.59964	48.8355		13.5997	41.9792		6.59896	43.4733		14.5993	53.9413		7.59835	42.0239		15.599	48.8564		0.599916	82.9473
0.601105	87.3164		8.60123	42.7039		1.60104	63.1984		9.60087	55.2237		2.60017	50.2492		10.6004	41.5587		3.60221	42.8351		11.6009	50.1179		4.6012	54.663		12.6014	43.1482		5.60082	52.8706		13.6007	43.9893		6.60021	41.2724		14.6011	42.3937		7.60009	51.1289		15.6005	54.3648		0.601513	75.417
0.602841	92.3029		8.60255	49.095		1.60264	59.9119		9.60212	46.6555		2.60114	44.0907		10.6019	43.7865		3.60305	52.2592		11.6019	48.4687		4.60245	50.6756		12.6023	42.5995		5.60256	41.8241		13.6022	43.0051		6.60111	41.8211		14.6027	49.2173		7.60134	54.0635		15.6022	44.6513		0.602416	80.9253
0.603883	88.1127		8.60443	59.8135		1.60424	51.1617		9.60303	48.245		2.60232	48.5612		10.6037	44.025		3.60409	48.922		11.603	45.1553		4.60425	53.1181		12.6034	38.5197		5.60415	46.1216		13.604	53.7922		6.6025	43.357		14.6036	53.6073		7.60231	46.2976		15.6035	45.5639		0.603388	80.2513
0.604716	89.9319		8.60581	49.2948		1.60528	50.2223		9.60441	48.3047		2.60399	47.2042		10.605	45.4506		3.60576	56.3599		11.6045	38.5614		4.60571	65.3487		12.6051	44.031		5.60512	54.2693		13.6053	57.4395		6.60431	47.8424		14.6047	52.7036		7.6037	49.3097		15.6044	53.3209		0.604985	86.6931
0.606175	94.9512		8.60658	42.4027		1.60632	52.2354		9.60622	40.3478		2.60566	50.0732		10.6059	47.744		3.60728	59.0142		11.6062	43.8103		4.60654	57.9942		12.6068	47.8186		5.60624	56.3629		13.6062	56.1512		6.60563	42.3013		14.6065	53.473		7.60551	46.4735		15.6059	42.6949		0.606583	90.0482
0.607911	93.4869		8.60776	49.1994		1.60792	56.3629		9.60754	45.1971		2.6067	51.9193		10.6072	47.1028		3.60832	42.6174		11.6074	46.1276		4.60766	59.7121		12.6079	39.5844		5.60797	49.5871		13.6076	45.5878		6.60653	43.3809		14.6081	46.2678		7.60689	42.4683		15.6077	51.9819		0.607694	78.2532
0.609091	98.6254		8.6095	50.2193		1.60959	58.8382		9.60844	43.4524		2.60774	55.5905		10.609	42.9991		3.60937	42.2655		11.6084	40.7743		4.60932	62.76		12.6089	52.8527		5.60964	45.1583		13.6094	39.2414		6.60792	44.1145		14.609	44.9197		7.6078	50.3804		15.6089	44.8452		0.608666	72.9983
0.610063	100.394		8.61095	53.4641		1.61084	59.3303		9.60983	46.4109		2.60941	46.232		10.6104	44.5231		3.61096	45.0062		11.6099	45.9546		4.61085	64.7075		12.6105	55.1909		5.61047	50.5474		13.6108	45.9636		6.60972	51.9193		14.6099	58.7607		7.60912	46.4258		15.6097	42.5548		0.610194	76.6099
0.611452	94.474		8.61186	52.4859		1.61174	63.0523		9.61171	42.182		2.61114	45.8293		10.6113	46.5242		3.6127	48.8743		11.6117	42.7904		4.61182	54.5854		12.6122	43.7566		5.61144	43.0737		13.6116	43.5956		6.61111	49.5781		14.6115	50.1627		7.61092	54.4274		15.611	47.8722		0.611999	75.9717
0.613189	95.5238		8.61304	49.2203		1.6132	54.3439		9.61303	50.5355		2.61212	44.2636		10.6127	43.1303		3.61388	48.2271		11.6128	59.1693		4.61293	51.29		12.6134	47.2072		5.61304	55.7635		13.613	50.6488		6.61195	47.7023		14.6132	45.4566		7.61231	45.2478		15.6127	43.4375		0.613249	70.4305
0.614577	94.6142		8.6147	45.4655		1.615	54.162		9.61379	44.0966		2.61302	44.1712		10.6145	44.0489		3.61485	53.0317		11.6137	51.2661		4.61453	58.3641		12.6143	50.9082		5.61464	44.1235		13.6149	59.7031		6.61313	40.658		14.6143	44.2577		7.61314	42.0358		15.6142	43.1542		0.614152	82.4374
0.61555	110.444		8.61637	48.5194		1.61625	55.5279		9.61504	46.1664		2.61455	48.6029		10.6159	45.3462		3.61631	44.6633		11.6151	47.4637		4.61627	50.3446		12.6159	44.0429		5.61575	52.5247		13.6162	44.207		6.61486	47.7291		14.6153	52.3815		7.61433	41.8241		15.6151	50.6726		0.61561	68.0387
0.6168	114.056		8.61741	49.8495		1.61715	50.619		9.6167	49.9867		2.61621	50.4818		10.6166	50.3416		3.61812	49.4022		11.6167	47.1714		4.61738	54.6511		12.6177	50.0344		5.61679	70.186		13.6169	45.1792		6.61632	54.1083		14.6168	53.8607		7.61599	43.3689		15.6163	44.6961		0.617347	69.0855
0.618536	105.315		8.61845	50.1179		1.61854	62.0621		9.61816	49.1397		2.61732	51.8894		10.6178	49.2173		3.61937	61.2241		11.618	46.7002		4.61835	50.0314		12.6188	47.9229		5.61832	58.8323		13.6181	54.156		6.61729	51.0782		14.6186	58.1046		7.61745	37.1717		15.618	41.326		0.618666	80.1201
0.620063	96.9076		8.62005	49.095		1.62042	58.2209		9.61914	49.7988		2.6183	44.2547		10.6195	46.3363		3.62027	52.808		11.6189	55.3131		4.61988	48.8922		12.6196	42.3311		5.62006	50.0195		13.6199	47.237		6.6184	49.1904		14.6198	57.6781		7.61842	41.9732		15.6196	46.5153		0.619569	82.3986
0.620966	110.641		8.62179	54.0337		1.62174	51.8864		9.62025	55.0686		2.61975	42.9812		10.621	40.5596		3.62173	46.9984		11.6203	51.6389		4.62168	54.8986		12.621	43.4196		5.6213	47.5323		13.6212	45.0003		6.62007	46.8791		14.6207	48.0363		7.61953	47.5472		15.6206	36.5215		0.620958	61.1943
0.622147	116.534		8.6229	51.9073		1.6225	41.3231		9.62198	46.402		2.62149	48.4001		10.622	42.3013		3.62353	56.1333		11.6221	54.326		4.62286	61.2241		12.6227	36.1577		5.62221	56.6224		13.6222	54.2723		6.62174	41.7316		14.6222	50.1746		7.6212	47.738		15.6217	42.3311		0.622832	73.6335
0.623952	106.934		8.6238	58.6146		1.62375	51.5196		9.62358	39.1728		2.62281	53.5237		10.6231	47.6844		3.62478	52.2056		11.6235	45.6444		4.62377	59.7926		12.6239	39.1579		5.6236	56.014		13.6234	46.5451		6.62285	44.9973		14.624	49.9539		7.62287	45.8264		15.6233	48.6148		0.624152	96.0874
0.62555	96.1411		8.6254	54.7226		1.62549	61.1764		9.62462	38.0336		2.62371	54.4572		10.6247	60.6247		3.62555	45.0062		11.6245	43.2288		4.62529	66.7354		12.6249	42.2148		5.6254	54.1978		13.6251	52.474		6.62382	43.4435		14.6253	48.5403		7.62398	45.8472		15.625	50.1985		0.624916	68.0238
0.626383	113.459		8.6272	61.2092		1.62688	62.76		9.62566	45.3969		2.6251	52.0207		10.6264	59.5033		3.62687	55.5965		11.6257	42.6741		4.6271	53.8667		12.6262	38.5167		5.62672	56.8938		13.6267	46.4765		6.62542	42.0209		14.6262	58.2418		7.62495	42.6383		15.6261	57.1085		0.626166	63.2938
0.627425	99.1622		8.62831	55.1819		1.62785	54.2753		9.62733	55.3042		2.62691	42.1014		10.6275	44.0638		3.6286	57.2099		11.6274	45.7011		4.62828	56.6015		12.628	44.5917		5.62762	51.117		13.6278	42.0776		6.62715	35.1318		14.6275	52.9332		7.62655	38.7374		15.6271	51.6091		0.627832	72.5003
0.629091	89.1446		8.62915	45.9725		1.62903	51.1886		9.62907	50.4877		2.6283	41.5288		10.6286	44.1294		3.62992	42.5697		11.629	50.3416		4.62904	65.6439		12.6294	46.4318		5.62901	48.588		13.6288	41.4066		6.62833	39.1877		14.6294	56.9296		7.62828	40.8638		15.6287	46.3721		0.629291	90.2898
0.630619	89.9409		8.63054	40.2285		1.63077	41.6392		9.63011	41.2575		2.6292	43.7596		10.6301	50.956		3.63082	46.5451		11.6299	41.7197		4.63043	53.6967		12.6304	44.2398		5.63089	54.5318		13.6305	44.1652		6.62924	43.6075		14.6308	57.4843		7.62946	45.0629		15.6305	52.2294		0.630263	75.6973
0.631661	96.6451		8.63227	51.6091		1.63236	54.3528		9.63108	47.8305		2.63052	47.1416		10.6318	49.9837		3.63207	53.1331		11.631	48.9817		4.63217	61.7251		12.6316	55.9454		5.63221	47.5352		13.6322	51.281		6.63083	54.1948		14.6315	58.54		7.63037	38.3885		15.6315	50.1925		0.631374	72.6046
0.632702	102.813		8.63352	44.5559		1.63334	61.1615		9.63268	49.9539		2.63232	53.2911		10.633	46.8404		3.63381	61.6058		11.6328	47.3951		4.63349	62.1486		12.6333	54.7375		5.63297	43.5538		13.6333	51.4093		6.63271	42.6174		14.6327	56.7148		7.63196	40.6908		15.6323	49.5394		0.63311	81.7872
0.634299	83.7496		8.63449	40.5626		1.63445	66.476		9.63448	46.1425		2.63378	57.4097		10.6339	45.0241		3.63541	47.583		11.6344	49.4529		4.63439	61.6148		12.6349	44.195		5.63422	45.5252		13.6342	50.8784		6.63382	39.301		14.6344	51.8298		7.63377	38.7225		15.6338	45.045		0.634708	76.4429
0.635966	82.5328		8.63581	45.9934		1.63611	66.6937		9.63553	51.2005		2.63455	51.1916		10.6355	47.1505		3.63638	48.8564		11.6353	47.3086		4.63564	66.2195		12.6359	40.989		5.63589	54.4304		13.6359	52.1459		6.63458	42.9663		14.6358	52.2145		7.63481	39.5217		15.6355	44.1712		0.635749	81.5128
0.637147	94.5426		8.63755	52.3845		1.63778	57.6065		9.63629	55.2535		2.63566	55.2296		10.6373	48.078		3.63749	58.0569		11.6363	48.3733		4.63738	55.0507		12.637	47.4249		5.63735	51.8119		13.6376	49.9718		6.63604	45.0778		14.6368	60.8155		7.63564	42.0806		15.6367	48.6566		0.636791	80.308
0.638119	93.0843		8.63901	51.5137		1.63882	56.0796		9.63782	58.1613		2.63739	50.0702		10.6384	44.884		3.63923	50.1985		11.6379	54.4632		4.63897	52.128		12.6388	51.7403		5.63832	52.2056		13.6387	49.6139		6.63778	45.8234		14.6379	59.7628		7.6371	53.0287		15.6376	58.6444		0.638388	81.2832
0.639577	92.959		8.63998	40.4671		1.63979	48.2391		9.63948	57.198		2.63885	51.8656		10.6392	46.9418		3.64089	46.2379		11.6395	47.5144		4.63995	53.3895		12.6404	48.6089		5.6395	48.6327		13.6395	39.8051		6.63896	54.0307		14.6397	62.6795		7.63877	50.9053		15.6391	49.6258		0.640124	86.7766
0.641383	96.3559		8.64116	50.3595		1.64146	51.293		9.64066	53.6222		2.63989	52.5038		10.6406	49.2381		3.64187	51.0275		11.6406	40.2345		4.64106	55.5398		12.6413	48.3703		5.64117	56.9296		13.641	57.6095		6.63993	51.3914		14.6413	59.4377		7.64009	49.0711		15.6409	49.945		0.641235	85.0916
0.642633	103.928		8.6429	50.5056		1.6432	56.6313		9.64164	55.4235		2.641	48.0393		10.6423	37.7681		3.64291	52.4263		11.6416	43.5509		4.64279	50.1686		12.6423	46.062		5.64283	57.0936		13.6427	60.0312		6.64125	49.8644		14.6424	58.1225		7.64099	50.9172		15.6423	46.1365		0.642208	85.8611
0.643536	105.84		8.6445	47.9707		1.64424	43.1363		9.64303	51.5912		2.64267	44.2785		10.6436	38.9044		3.64464	49.6318		11.6431	40.5715		4.64439	49.089		12.6439	43.2139		5.64387	52.5843		13.6439	51.7433		6.64306	47.3414		14.6434	58.1911		7.64231	40.4105		15.6432	46.8881		0.643805	85.2407
0.644994	93.4183		8.64547	57.4157		1.64507	46.7658		9.64476	50.8933		2.64434	43.9117		10.6445	50.3625		3.64631	50.8575		11.6449	44.9764		4.64543	45.3104		12.6455	55.2147		5.64492	47.744		13.6448	51.0842		6.64451	48.8236		14.645	48.7103		7.64412	46.6316		15.6445	42.8232		0.645541	69.7535
0.6468	90.9131		8.64658	63.434		1.6466	47.8782		9.64615	50.0732		2.64538	46.1604		10.6459	48.6119		3.64728	48.087		11.6461	39.2891		4.64647	54.0814		12.6466	43.026		5.64658	40.6341		13.6462	47.911		6.64549	43.0558		14.6468	50.9977		7.64558	46.387		15.6462	43.2646		0.646652	73.3204
0.64805	88.6346		8.64838	63.6249		1.64827	57.7348		9.64712	39.4054		2.64642	47.8543		10.6477	50.4221		3.64819	52.7633		11.6471	44.875		4.64821	58.036		12.6475	43.3302		5.64825	45.6832		13.648	45.7876		6.64667	38.4988		14.6479	54.7644		7.64648	45.6266		15.6478	42.17		0.647416	62.596
0.648813	98.1303		8.64998	52.3219		1.64945	56.7655		9.64837	47.0909		2.64795	49.6199		10.6491	51.1528		3.64971	59.0768		11.6485	39.4621		4.64988	64.1855		12.6491	40.2107		5.64936	61.2867		13.6494	51.8179		6.6484	46.5362		14.6488	52.3726		7.64766	38.4332		15.6487	46.4407		0.648874	69.2972
0.650133	88.7211		8.65081	45.892		1.65035	55.9871		9.65018	45.9129		2.64968	44.7348		10.65	42.6144		3.65131	57.0608		11.6502	38.2632		4.65085	54.6332		12.6508	46.4467		5.6504	65.9183		13.6503	54.4423		6.64993	46.2409		14.6504	52.7752		7.64946	49.9957		15.6498	44.0489		0.65061	70.0876
0.651869	98.1453		8.65179	39.7484		1.65181	39.14		9.65171	41.1918		2.65087	45.2687		10.6512	44.2845		3.65249	57.9286		11.6515	44.3322		4.65175	55.1193		12.6521	51.1737		5.652	54.2813		13.6516	54.5377		6.6509	50.3953		14.6522	54.5616		7.65099	50.5027		15.6517	40.8041		0.651791	69.4046
0.653258	100.928		8.65338	47.2579		1.65354	45.4387		9.65261	41.0666		2.65184	41.6183		10.6529	37.9292		3.65346	59.2707		11.6524	40.3747		4.65328	55.3728		12.653	49.8793		5.65374	58.206		13.6533	52.7334		6.65208	52.4054		14.6533	53.8011		7.65196	45.1285		15.6532	54.0785		0.652763	76.5711
0.65423	105.61		8.65498	54.6272		1.65493	47.1118		9.65379	44.5977		2.65337	37.8964		10.6545	43.0439		3.65492	52.292		11.6538	41.8718		4.65495	53.3657		12.6544	44.8392		5.65478	60.7141		13.6549	39.5993		6.65382	57.7676		14.6541	45.8801		7.65308	47.5919		15.654	43.1363		0.654152	65.6171
0.655411	97.0716		8.65602	54.2037		1.65584	46.6405		9.65559	41.0368		2.65517	48.9817		10.6555	48.421		3.65673	48.764		11.6556	44.6215		4.65606	54.4721		12.6562	48.2868		5.65561	52.1966		13.6558	42.1999		6.65542	50.7591		14.6555	50.276		7.65488	44.9883		15.6551	45.3611		0.655958	68.4413
0.657147	95.4522		8.65706	53.7832		1.65715	63.0582		9.65712	42.4414		2.65628	51.3854		10.6566	50.4311		3.65805	49.6915		11.657	48.4836		4.65703	59.9894		12.6575	41.499		5.65707	49.8465		13.6569	35.7252		6.65632	38.2572		14.6572	53.2702		7.65648	48.9996		15.6568	49.6557		0.657346	76.8127
0.658744	90.0661		8.65859	54.6272		1.65889	56.0826		9.65796	47.0312		2.65712	49.7272		10.6584	46.1455		3.65895	55.5666		11.6578	45.215		4.65849	54.6123		12.6584	49.936		5.6588	56.7745		13.6587	48.3285		6.65729	45.7906		14.6585	54.2276		7.65731	43.0856		15.6583	47.3742		0.658319	84.9067
0.659716	87.558		8.66033	50.3386		1.66035	58.1195		9.659	45.1136		2.6585	49.8972		10.66	45.6504		3.66027	44.6096		11.659	55.7664		4.66029	47.5352		12.6598	45.2508		5.65999	43.3302		13.6603	50.9261		6.65889	48.7669		14.6594	60.9766		7.65828	43.6373		15.6594	46.0262		0.659499	92.9948
0.660827	93.7553		8.66158	63.1328		1.66125	55.4921		9.66066	50.6846		2.66017	50.5325		10.6609	47.9617		3.66207	54.32		11.6607	57.9614		4.66161	48.6298		12.6616	47.0312		5.66096	48.6655		13.6612	43.864		6.66049	54.4393		14.6608	59.1096		7.65995	50.0881		15.6604	41.7973		0.661235	96.9046
0.662494	102.887		8.66248	49.3843		1.6625	52.5933		9.66219	58.1344		2.66149	51.6986		10.6618	42.5935		3.66346	55.7515		11.6621	52.2533		4.66252	59.4675		12.663	53.0376		5.66235	51.6061		13.6621	43.8014		6.66153	45.1762		14.6626	56.6403		7.66155	46.566		15.662	42.173		0.662763	95.0764
0.664161	106.394		8.66394	41.5109		1.66431	50.0523		9.66323	52.1071		2.66239	46.3751		10.6634	42.6562		3.66437	60.574		11.6631	55.501		4.66391	59.2409		12.6637	47.4845		5.66415	51.9878		13.6638	40.1838		6.66257	54.0039		14.664	51.6031		7.66259	54.3677		15.6637	45.0182		0.663735	78.3009
0.665202	106.645		8.66574	42.4981		1.66584	54.0307		9.66428	56.7417		2.66371	41.5706		10.665	48.3733		3.66569	47.9796		11.6642	44.884		4.66571	50.3416		12.665	45.5192		5.66554	47.8812		13.6654	46.4049		6.6641	46.2379		14.6649	54.9105		7.66363	59.4019		15.6649	45.1375		0.664916	71.9754
0.666174	98.1303		8.66706	43.9773		1.66667	55.0835		9.6658	57.7437		2.66552	39.3965		10.6661	44.6394		3.66749	54.2455		11.666	43.4107		4.6671	55.7098		12.6667	46.9388		5.66651	50.1686		13.6664	42.853		6.66583	42.2983		14.6662	60.9497		7.66516	47.4159		15.6659	47.6993		0.666721	77.1288
0.667841	93.8388		8.66797	53.1211		1.66771	50.5414		9.66754	46.8493		2.66698	50.1865		10.6671	40.2077		3.66895	49.6795		11.6676	47.1565		4.668	61.0959		12.6681	42.8262		5.66769	50.452		13.6675	37.2552		6.66708	46.8791		14.6679	52.2234		7.66689	44.8392		15.6673	55.668		0.668249	66.7951
0.669577	94.0714		8.66936	48.6327		1.66938	53.6192		9.66879	42.9454		2.66788	50.9112		10.6686	47.6545		3.66978	46.2946		11.6687	54.3767		4.66932	62.9538		12.6691	44.9824		5.6695	47.5979		13.669	31.0728		6.66799	55.0835		14.6695	52.7633		7.66815	50.5355		15.6692	54.9523		0.669083	69.0825
0.67055	98.5121		8.67123	53.3329		1.6709	57.0399		9.66969	46.8523		2.66906	45.3283		10.6704	46.1634		3.67089	52.5634		11.6696	46.2707		4.67113	67.818		12.6702	45.5639		5.67103	51.0872		13.6708	45.6176		6.66945	48.3196		14.6704	61.069		7.66905	55.328		15.6704	47.4159		0.670124	68.9483
0.671383	89.2132		8.67255	51.117		1.67195	59.4228		9.67115	45.1882		2.6708	51.4987		10.6717	50.1149		3.67256	52.8736		11.6713	40.3657		4.67252	70.0518		12.6719	38.5376		5.67193	46.39		13.672	52.1221		6.67125	47.8186		14.6715	52.5396		7.67051	44.875		15.6713	46.2946		0.671791	73.893
0.672911	104.164		8.67331	44.368		1.67306	57.2457		9.67296	49.9002		2.67239	55.2833		10.6726	53.1211		3.67402	51.9073		11.673	48.6715		4.67335	62.9986		12.6735	52.7334		5.67311	47.7768		13.6729	47.9945		6.67257	56.1035		14.6733	54.0993		7.67231	45.5937		15.6727	45.7846		0.673319	66.0406
0.674577	104.402		8.67449	45.4894		1.67465	53.479		9.67428	51.7194		2.67337	54.2007		10.674	47.0521		3.67506	47.5502		11.6741	38.5406		4.67446	61.7251		12.6746	59.0172		5.67492	51.457		13.6744	39.313		6.6734	47.1803		14.6749	57.6751		7.67363	45.1852		15.6746	44.878		0.67436	76.3147
0.675758	113.125		8.67623	50.452		1.67632	53.2553		9.67511	44.9108		2.67448	52.0415		10.6758	51.0305		3.67617	50.7711		11.6751	40.7355		4.6762	64.7939		12.6756	59.8522		5.67644	49.1845		13.6762	46.897		6.67486	53.2941		14.6758	52.4054		7.67453	52.2413		15.6758	50.5235		0.675402	92.1299
0.67673	107.886		8.67762	51.5017		1.6775	57.2427		9.67657	33.5273		2.67621	45.6355		10.6771	46.0232		3.67777	50.282		11.6767	51.2512		4.67766	59.8612		12.6773	51.2333		5.67728	44.4843		13.6775	50.4013		6.67667	46.4944		14.6768	62.7063		7.67592	52.981		15.6766	43.6344		0.676999	78.2353
0.678188	107.349		8.67859	50.8874		1.67847	50.5862		9.67837	40.4403		2.67788	45.2269		10.678	52.5038		3.67951	52.462		11.6785	44.7647		4.6787	60.0192		12.679	40.831		5.67832	49.3634		13.6783	41.0964		6.67799	49.7183		14.6784	65.8735		7.67773	49.93		15.6779	53.0257		0.678666	78.2681
0.679925	111.211		8.67977	52.2771		1.67993	49.2292		9.67962	48.6178		2.67878	56.0021		10.6794	46.9984		3.68062	59.7508		11.6795	51.1588		4.67974	55.4265		12.6801	39.7514		5.67999	52.6827		13.6798	47.0551		6.67875	41.7704		14.68	58.9903		7.67905	42.4504		15.6796	55.51		0.679916	85.6791
0.681314	97.2506		8.68144	51.4749		1.68174	42.4444		9.68046	45.3015		2.67975	44.5171		10.6813	43.2347		3.68159	61.9399		11.6803	52.8169		4.68141	59.4198		12.6811	45.7906		5.68151	47.1088		13.6817	41.1531		6.68	34.2311		14.6811	49.0562		7.67988	49.5304		15.681	46.73		0.680819	79.3715
0.682216	98.0796		8.68311	55.5279		1.68299	53.2583		9.68171	44.7676		2.68135	48.5462		10.6826	45.4148		3.68305	56.0736		11.6818	47.6128		4.68307	55.3787		12.6827	47.6337		5.68262	55.0805		13.6829	44.1026		6.68167	45.4774		14.6821	53.649		7.68106	43.4465		15.6819	47.9349		0.682277	72.5867
0.683536	93.8984		8.68415	48.755		1.68382	48.7192		9.68344	45.7309		2.68295	47.6337		10.6834	44.5201		3.68485	62.2023		11.6835	43.0051		4.68418	55.8768		12.6844	44.6812		5.68367	57.9674		13.6837	41.7227		6.68313	49.1308		14.6837	50.9739		7.6828	48.9548		15.6832	45.8681		0.684083	68.1998
0.685272	96.4602		8.68512	43.7179		1.68535	52.641		9.68476	51.3168		2.68406	51.2512		10.6845	44.0936		3.6861	61.3523		11.6847	42.8858		4.68523	60.4606		12.6855	44.8422		5.68519	52.2205		13.6849	50.5593		6.6841	40.8399		14.6854	48.7162		7.68426	54.493		15.6848	44.1264		0.685332	74.6088
0.68673	103.689		8.68679	51.8596		1.68715	55.3221		9.68573	45.9785		2.68503	51.1289		10.6863	44.6871		3.68701	47.9229		11.6857	41.6273		4.68675	62.3425		12.6863	47.9826		5.68693	48.6924		13.6867	53.4939		6.68528	41.1561		14.6867	54.5467		7.68523	52.0535		15.6864	43.1989		0.686235	81.6828
0.687633	113.507		8.68852	51.9491		1.6884	50.3356		9.68698	42.1909		2.68656	48.5134		10.6877	51.1945		3.68853	49.5036		11.687	56.6999		4.68856	59.0619		12.6877	46.5004		5.68818	46.5063		13.688	49.5274		6.68701	43.7537		14.6876	60.1833		7.68641	45.9934		15.6875	44.9347		0.687694	70.1502
0.688883	109.568		8.68963	44.0817		1.68917	48.6178		9.68865	43.0409		2.6883	50.6995		10.6887	40.8429		3.69034	52.5664		11.6888	58.2507		4.68974	58.3104		12.6895	48.4687		5.68908	47.2847		13.6889	47.3354		6.68861	46.3602		14.689	58.0658		7.68808	40.0228		15.6885	47.3861		0.689499	70.1084
0.690688	107.614		8.69061	49.772		1.69049	54.3856		9.69025	42.17		2.68955	51.7105		10.6898	37.8725		3.69152	51.9252		11.6902	54.8598		4.69064	56.7715		12.6907	45.725		5.69054	45.9337		13.6902	45.0241		6.68965	53.2166		14.6908	53.3716		7.68967	36.3008		15.6903	50.1567		0.690749	67.144
0.692147	100.624		8.6922	55.498		1.69222	50.5981		9.69129	46.5153		2.69052	46.4914		10.6916	38.9074		3.69228	44.3501		11.6912	48.0721		4.69217	46.2379		12.6916	47.5919		5.69235	55.0388		13.6919	46.2588		6.6907	47.9617		14.6922	61.2897		7.69071	41.1054		15.6919	50.2641		0.691513	82.0377
0.69298	95.1033		8.69401	54.9344		1.69354	46.2528		9.69233	57.8243		2.69184	44.2845		10.6931	47.6128		3.69367	45.2239		11.6924	44.2577		4.69397	57.3501		12.693	40.3061		5.69367	50.1448		13.6935	42.5458		6.69236	40.6878		14.693	56.1542		7.69176	55.9543		15.693	46.8821		0.692763	76.6636
0.694022	100.093		8.69505	46.8881		1.69445	49.9628		9.694	59.5779		2.69364	46.903		10.6942	55.343		3.69534	42.6084		11.6941	42.176		4.69509	57.3113		12.6948	39.8886		5.6945	52.1936		13.6945	45.0539		6.69403	47.3802		14.6944	51.5047		7.69335	60.4875		15.6939	41.5408		0.694499	78.1786
0.695758	111.354		8.69581	53.485		1.6957	56.5448		9.69566	47.3354		2.69496	46.2111		10.6952	43.87		3.69666	47.1833		11.6956	43.9058		4.69592	71.2984		12.6961	39.5844		5.69589	57.3083		13.6955	52.7871		6.69514	49.8704		14.6963	46.5213		7.69509	48.4747		15.6957	39.1281		0.695888	78.7184
0.697216	115.401		8.69734	49.4141		1.69743	55.7843		9.69678	48.0512		2.69587	39.808		10.6968	45.6087		3.69756	52.0535		11.6966	42.3013		4.69731	62.4856		12.6971	47.8722		5.69776	58.6683		13.6972	43.2198		6.69611	50.616		14.6975	45.1434		7.6962	50.8367		15.6974	39.4144		0.69686	67.7196
0.698258	115.577		8.69901	48.0542		1.69903	48.4031		9.69775	47.4547		2.69725	46.5451		10.6986	49.5722		3.69888	50.0225		11.6977	47.2847		4.69898	54.9553		12.6984	45.3492		5.69901	49.1099		13.6989	38.4809		6.69778	51.8536		14.6983	51.4361		7.69717	47.8633		15.6983	41.1918		0.698041	74.9905
0.6993	116.651		8.70019	51.1498		1.7	46.1186		9.69941	50.8605		2.69906	50.9202		10.6996	50.9977		3.70062	55.0447		11.6995	40.9831		4.70029	52.7633		12.7001	41.6213		5.69985	46.8881		13.7	36.4738		6.69958	54.7375		14.6995	58.9009		7.69877	46.2618		15.6992	52.5127		0.699708	70.7437
0.700897	128.771		8.70116	50.9082		1.70111	50.6518		9.70108	52.5783		2.70045	46.8105		10.7006	48.922		3.70214	44.7855		11.7011	54.7107		4.7012	54.2753		12.7016	37.2641		5.7011	42.5846		13.701	44.0608		6.70063	44.6633		14.7013	51.8029		7.70058	44.031		15.7008	50.8635		0.701305	76.8485
0.702633	122.729		8.70255	47.4696		1.70278	44.6066		9.70212	51.0484		2.70121	48.8326		10.7022	47.3086		3.70312	46.8523		11.7019	61.8802		4.70252	55.668		12.7025	40.7177		5.70283	42.8172		13.7026	45.8293		6.70146	43.5031		14.7027	50.6518		7.70162	46.9984		15.7024	39.5486		0.702346	80.4243
0.703744	113.495		8.70436	49.0592		1.70445	41.842		9.70296	53.142		2.70239	47.24		10.704	46.1514		3.70423	51.0246		11.7029	50.5772		4.70432	53.8816		12.7037	49.5334		5.70422	40.4612		13.7044	37.4878		6.70292	49.8525		14.7036	53.7206		7.70245	49.5453		15.7036	39.4979		0.703458	78.0384
0.704716	102.801		8.70574	46.2379		1.70549	49.1696		9.70448	44.2249		2.70406	51.5763		10.705	42.8321		3.70596	52.4799		11.7046	45.7757		4.70578	53.5148		12.7055	43.7059		5.70519	47.8752		13.7054	40.9711		6.70458	53.3269		14.7048	54.1739		7.70391	47.3593		15.7046	49.1069		0.705055	78.8347
0.706244	112.717		8.70672	47.9945		1.70653	53.0466		9.70615	41.2694		2.70552	53.8786		10.7058	51.7493		3.70756	50.8367		11.7061	44.1712		4.70675	59.0947		12.7071	42.1999		5.70637	50.0344		13.7062	43.2795		6.70576	49.6527		14.7065	55.9573		7.70564	45.8025		15.706	48.1943		0.706721	84.1611
0.708049	111.22		8.7079	45.889		1.7082	51.3556		9.70733	44.6752		2.70649	49.6557		10.7073	56.3927		3.7086	61.1287		11.7072	51.8447		4.70793	62.7481		12.708	42.3013		5.70811	44.0996		13.7078	41.9136		6.70674	51.9193		14.7081	59.5242		7.70683	46.9179		15.7078	56.0945		0.707833	86.7468
0.70923	99.2368		8.7097	50.9172		1.70986	45.9934		9.7083	47.9587		2.70767	51.1081		10.709	49.7869		3.70964	48.0243		11.7083	58.8949		4.70967	57.4485		12.7089	40.7236		5.70971	49.2859		13.7094	48.594		6.7082	54.5765		14.7092	60.0401		7.7078	53.649		15.7091	62.1158		0.708805	75.0114
0.710133	97.3102		8.71123	46.9179		1.71084	42.6234		9.70976	45.4297		2.70934	44.2547		10.7102	37.4401		3.71138	46.7479		11.7098	55.2893		4.71127	50.2223		12.7106	45.7637		5.71068	53.4074		13.7106	57.535		6.71	42.7725		14.7102	59.1723		7.70912	53.5118		15.71	55.8052		0.710472	73.5769
0.711661	103.358		8.71213	53.2076		1.71174	43.6642		9.7115	45.2508		2.711	43.1095		10.7111	39.7096		3.71305	48.1198		11.7115	53.5327		4.71224	65.2234		12.7121	42.1343		5.71179	53.3418		13.7115	56.0528		6.71139	42.34		14.7119	47.7351		7.71092	40.7982		15.7113	49.3097		0.712208	69.5925
0.713466	107.793		8.71331	50.1478		1.71327	39.7961		9.71289	55.7426		2.71205	35.9012		10.7125	41.3767		3.71402	48.4806		11.7127	43.6135		4.71335	72.3243		12.7132	39.8408		5.71346	55.9454		13.713	46.6674		6.71236	48.0124		14.7136	52.8855		7.71231	43.36		15.7131	40.0049		0.71318	77.3465
0.714647	100.114		8.71512	53.2195		1.71486	49.1815		9.71379	58.6533		2.71309	46.8761		10.7143	42.7784		3.71492	49.0115		11.7137	46.7419		4.71509	66.0197		12.7142	43.8222		5.71512	49.8376		13.7148	44.9824		6.71361	50.4907		14.7147	54.2037		7.71328	43.8103		15.7146	43.1751		0.714013	89.6516
0.715411	110.045		8.71672	54.2604		1.71604	44.4127		9.71504	64.2512		2.71462	49.5692		10.7157	49.593		3.71645	61.0094		11.7151	47.7559		4.71668	64.2959		12.7158	39.811		5.71617	46.4288		13.7161	44.4933		6.71535	46.6197		14.7156	51.0902		7.71453	50.4221		15.7155	47.0253		0.715541	79.9233
0.716799	109.562		8.71755	43.7179		1.71702	48.4926		9.71684	63.9231		2.71635	49.7571		10.7166	51.5614		3.71812	54.2991		11.7169	47.9468		4.71766	64.6061		12.7175	38.9581		5.71721	51.3437		13.717	42.4981		6.71688	44.1056		14.7173	52.2622		7.71627	53.3746		15.7167	51.123		0.717208	83.842
0.718536	109.466		8.71852	48.5671		1.71847	50.6458		9.7183	50.61		2.71753	45.2001		10.7179	52.5098		3.71923	45.6504		11.7182	48.7878		4.71856	62.6556		12.7187	42.0657		5.71887	39.4263		13.7183	38.6628		6.71778	48.4389		14.719	59.5421		7.7178	42.2028		15.7186	53.148		0.718388	74.9309
0.719855	113.901		8.72019	52.2384		1.72028	48.1019		9.71921	50.3237		2.71843	47.4488		10.7196	54.2842		3.7202	43.8193		11.7191	40.5745		4.72016	63.9678		12.7196	43.196		5.72061	48.7282		13.7201	41.7376		6.71896	41.5766		14.7201	64.3854		7.7187	38.4839		15.7201	45.7757		0.71936	69.4732
0.720758	101.742		8.72172	48.1407		1.72153	50.437		9.72046	56.2138		2.72003	44.0877		10.7211	50.0464		3.72173	47.2668		11.7205	43.6045		4.72175	60.0282		12.7211	43.0349		5.72158	51.0872		13.7216	50.6279		6.72077	47.1267		14.7209	53.9771		7.71988	49.7004		15.7208	49.1785		0.720819	80.9909
0.722008	103.695		8.72276	51.9193		1.7225	50.8695		9.72226	48.1198		2.72184	51.4749		10.7221	46.1634		3.72346	42.9305		11.7224	41.5587		4.72286	62.0442		12.7229	46.0978		5.72242	43.9207		13.7225	42.7814		6.72229	49.3217		14.7224	54.9553		7.72169	53.1748		15.7219	49.2799		0.722555	85.4495
0.723744	111.646		8.7238	46.6107		1.72382	48.6238		9.72379	52.4829		2.72295	53.8786		10.7232	44.9048		3.72471	38.8925		11.7236	45.716		4.72384	59.7777		12.7242	43.4852		5.72394	39.5665		13.7237	49.8108		6.72313	47.0461		14.724	63.3296		7.72328	49.6825		15.7236	42.6025		0.723944	85.8074
0.725341	111.658		8.7254	51.9521		1.72563	55.3161		9.72455	48.4836		2.72371	45.1225		10.725	48.6417		3.72569	47.6873		11.7244	46.3692		4.72536	65.3397		12.725	43.5031		5.72561	48.9399		13.7255	51.2035		6.72417	43.527		14.7252	64.7462		7.72412	52.5962		15.7251	42.2118		0.724846	77.3585
0.726313	109.225		8.72713	56.861		1.72702	48.2421		9.72566	54.5258		2.72517	41.8539		10.7266	45.5252		3.72701	50.5504		11.7256	49.0234		4.72717	62.8554		12.7265	43.6016		5.72679	49.423		13.7271	45.4446		6.72583	43.8938		14.7262	65.1459		7.72516	37.792		15.7262	45.5967		0.726166	80.1708
0.727425	103.263		8.72831	47.6247		1.72792	50.7293		9.72733	53.3001		2.72691	46.9239		10.7275	49.1338		3.72881	44.7229		11.7274	51.1528		4.72842	55.4682		12.7284	37.8218		5.72776	50.2939		13.7278	49.8555		6.72736	42.3848		14.7277	59.381		7.72683	37.0255		15.7273	43.5121		0.727902	79.7771
0.729161	105.365		8.72929	54.4811		1.72917	52.3606		9.72886	51.9491		2.72809	44.8899		10.7285	45.0569		3.73027	41.2366		11.7287	47.6575		4.72932	65.3725		12.7296	34.076		5.72922	39.4233		13.7289	46.7598		6.7284	44.1503		14.7294	54.5556		7.72835	40.1361		15.7289	51.3079		0.72943	71.1552
0.730758	91.1457		8.73075	60.7052		1.73104	55.9663		9.72983	48.8266		2.72906	50.2283		10.7302	47.8633		3.7311	56.2436		11.7297	58.4148		4.73071	55.5905		12.7304	38.463		5.73096	46.0113		13.7306	52.7394		6.72945	54.4095		14.7308	62.0949		7.72946	46.6227		15.7305	52.0684		0.730333	71.9396
0.7318	90.1347		8.73255	51.0484		1.7325	44.2636		9.73094	49.7422		2.73045	52.1728		10.7317	49.089		3.73242	57.8809		11.731	51.0693		4.73252	58.9009		12.7316	45.0718		5.73235	52.4471		13.7321	57.2785		6.73104	51.3824		14.7317	49.1666		7.73051	42.7486		15.7317	44.0638		0.731583	76.9708
0.732841	104.927		8.7338	48.8773		1.73327	45.3581		9.73254	58.9337		2.73219	48.7759		10.7327	38.4034		3.7343	44.3919		11.7326	47.4995		4.73391	65.7721		12.7334	44.0817		5.73325	51.0872		13.7332	48.8236		6.73278	44.3233		14.733	55.1103		7.73203	45.4595		15.7327	44.541		0.733388	88.0769
0.734508	94.483		8.7347	57.6095		1.73438	44.7229		9.73427	53.5834		2.73357	42.9514		10.7338	37.6697		3.73569	39.5456		11.7342	53.5625		4.73481	60.1356		12.7348	38.8448		5.7345	38.3974		13.7342	50.0016		6.73396	43.9893		14.7347	48.4747		7.73377	42.7188		15.7342	42.3192		0.734846	70.3381
0.736244	88.241		8.73616	53.306		1.73604	50.1209		9.73539	49.262		2.73455	42.1372		10.7353	46.1753		3.73645	45.9993		11.7353	53.4701		4.73613	49.5006		12.7357	43.5598		5.73631	45.3224		13.7358	52.1012		6.73493	42.1313		14.7363	51.5047		7.73495	39.6858		15.736	47.5621		0.73568	74.2658
0.737147	97.1611		8.73797	52.301		1.73757	56.1064		9.73636	45.212		2.7358	38.7672		10.737	45.555		3.73763	46.1574		11.7364	42.6919		4.73793	52.131		12.7369	45.1524		5.73783	45.6266		13.7376	45.2925		6.73639	48.5552		14.7372	46.7419		7.73592	42.3311		15.7372	44.5589		0.736722	76.2282
0.73805	115.481		8.73922	47.0372		1.73861	54.4602		9.73789	51.7731		2.73753	44.9287		10.7383	49.4081		3.7393	47.2161		11.738	42.3221		4.73932	56.9385		12.7386	46.566		5.73874	44.1175		13.7387	45.3581		6.73819	50.4162		14.7384	52.8915		7.73738	49.0055		15.7381	47.8484		0.738388	74.9696
0.739577	119.642		8.74005	48.2331		1.73972	55.5756		9.73969	49.0741		2.73906	44.7945		10.7393	47.6873		3.74076	52.307		11.7396	49.3246		4.74009	62.5125		12.7402	48.9608		5.73999	41.8629		13.7396	43.8521		6.73945	50.1239		14.7402	59.0381		7.73919	45.5729		15.7396	47.2788		0.739916	75.1247
0.741244	106.898		8.7413	49.0473		1.74132	54.0128		9.74087	49.4797		2.74003	37.8218		10.7407	40.1093		3.7418	60.2429		11.7408	45.4476		4.74127	64.4987		12.7412	44.5261		5.74179	52.5694		13.7411	49.3455		6.74035	46.6644		14.7417	56.9385		7.74051	40.0377		15.7414	46.7181		0.740958	74.5998
0.742355	100.859		8.74304	50.4997		1.74299	48.075		9.74177	46.5153		2.74121	47.1923		10.7425	48.0005		3.74291	59.721		11.7417	46.053		4.743	65.5246		12.7423	40.2584		5.74325	52.1399		13.7429	47.5084		6.74181	41.5497		14.7425	62.6288		7.74141	46.6197		15.7426	40.154		0.741999	72.1126
0.743397	111.476		8.74443	52.6022		1.7441	58.6444		9.7433	48.6566		2.74295	43.3093		10.7438	46.4974		3.7445	54.7465		11.7434	46.3781		4.74439	60.4875		12.744	41.8658		5.74408	57.3352		13.7442	40.5238		6.74361	39.1251		14.7436	59.1395		7.74287	50.4311		15.7434	39.5993		0.743596	76.4936
0.744855	108.303		8.7454	45.0182		1.74514	50.0553		9.74511	45.4655		2.74455	46.903		10.7447	47.577		3.74617	48.6983		11.7451	52.7394		4.74536	49.8615		12.7457	41.2276		5.74512	54.5318		13.7451	44.5261		6.74486	43.3749		14.7452	53.9383		7.74467	50.2402		15.7448	40.8578		0.745333	75.918
0.746591	97.6233		8.74658	48.7013		1.74667	46.1664		9.74636	49.1338		2.74545	49.6318		10.7461	40.2017		3.74728	54.4453		11.7462	50.1478		4.74654	51.2333		12.7467	41.2068		5.74679	52.7304		13.7466	47.4368		6.74563	55.0268		14.7468	54.3916		7.74592	47.8365		15.7464	38.3467		0.746513	72.4645
0.747911	95.2226		8.74831	38.7851		1.7484	43.4912		9.74712	50.7651		2.74642	45.8204		10.7479	39.1877		3.74832	54.5586		11.747	42.0895		4.74821	57.3202		12.7477	42.7486		5.74839	43.4196		13.7484	49.5722		6.74694	56.2526		14.7478	64.6269		7.74676	46.0918		15.7478	45.5043		0.747485	63.3773
0.748814	102.213		8.74991	35.6537		1.74959	42.7188		9.74844	55.4175		2.74802	55.5726		10.7491	43.5717		3.74985	47.1356		11.7485	35.3554		4.74988	69.6283		12.7493	42.0657		5.74943	40.5805		13.7496	44.8959		6.74868	49.3455		14.7488	57.0071		7.74801	46.8076		15.7487	39.143		0.748944	74.394
0.750133	87.904		8.75088	43.7179		1.75049	44.4157		9.75018	48.0482		2.74962	57.5081		10.75	48.4448		3.75159	47.6098		11.7501	42.2864		4.75092	69.1988		12.7511	39.2295		5.75047	45.2269		13.7504	48.7103		6.75	52.2384		14.7505	58.6623		7.74974	44.702		15.75	48.2122		0.750749	77.8207
0.751938	93.1648		8.75193	50.109		1.75202	49.6885		9.7515	43.7268		2.75066	47.0432		10.7512	53.6937		3.75277	44.705		11.7514	42.9425		4.75196	59.6107		12.7521	42.1492		5.75207	42.6353		13.7517	45.7101		6.75097	51.7135		14.7522	60.0043		7.75113	50.4609		15.7517	54.4274		0.75193	84.3669
0.753397	103.54		8.75366	48.7252		1.75382	49.3425		9.7524	51.6001		2.7517	39.8707		10.7529	49.5632		3.75374	44.3173		11.7524	45.8413		4.75356	60.5173		12.753	51.8626		5.75374	44.0668		13.7535	48.0691		6.75222	50.6548		14.7533	53.822		7.7521	49.8525		15.7533	49.9748		0.752832	87.5431
0.754299	108.285		8.75533	49.8555		1.755	49.086		9.75365	47.231		2.7533	42.1671		10.7543	44.1801		3.75527	53.9621		11.7537	42.8112		4.75529	53.7713		12.7545	47.4368		5.75492	43.2288		13.7548	46.5898		6.75396	47.9677		14.7543	49.0503		7.75328	49.0294		15.7542	45.2866		0.75436	78.963
0.75555	103.859		8.75637	33.4408		1.75577	48.3554		9.75539	36.617		2.75496	45.2418		10.7552	46.6883		3.75707	58.4863		11.7555	46.0978		4.75647	55.0924		12.7561	38.8239		5.75589	50.3267		13.7557	48.9369		6.75556	44.2249		14.7558	47.5144		7.75502	48.5492		15.7554	42.015		0.756166	76.598
0.757355	106.189		8.75734	44.1026		1.75715	50.3953		9.75698	46.5183		2.75621	49.6557		10.7565	44.875		3.75819	62.9926		11.7569	49.4171		4.75738	60.1445		12.7573	42.686		5.75742	56.0438		13.7569	46.1753		6.75653	40.5298		14.7576	48.5373		7.75662	55.0447		15.7571	45.5341		0.757416	71.4266
0.758814	99.2338		8.75901	45.8502		1.75889	45.5967		9.75796	50.3983		2.75712	50.0911		10.7581	34.9558		3.75902	56.6403		11.7578	49.6557		4.75898	60.398		12.7583	48.8713		5.75915	47.9229		13.7587	41.9285		6.75764	37.8218		14.7588	50.8098		7.75759	48.7818		15.7587	47.1088		0.75818	74.066
0.759577	93.9581		8.76075	43.4345		1.76021	42.185		9.75907	39.5217		2.75857	47.3295		10.7597	42.8709		3.76041	58.3402		11.7591	58.0151		4.76078	56.1154		12.7598	53.0853		5.76047	51.5852		13.7602	48.928		6.75938	39.4919		14.7597	55.0298		7.7587	43.0528		15.7598	48.3733		0.759499	69.0229
0.760758	93.5227		8.76179	61.2271		1.76118	46.223		9.76073	48.081		2.76038	51.4898		10.7608	45.4208		3.76214	53.3269		11.7608	49.1338		4.76182	52.7841		12.7615	51.4659		5.76137	49.8346		13.7612	50.7472		6.76104	40.327		14.7612	54.7704		7.76037	44.2189		15.7608	43.7656		0.761235	74.5193
0.762425	92.0255		8.76262	54.997		1.76243	57.7348		9.7624	50.4221		2.7617	55.1521		10.7619	44.547		3.76339	50.9649		11.7624	47.917		4.76266	68.7813		12.7628	47.6903		5.76283	54.9553		13.7623	56.4524		6.76208	53.2792		14.763	48.8654		7.76203	52.5843		15.7625	50.604		0.762555	72.6703
0.763883	104.685		8.76415	47.3086		1.76417	57.4067		9.76344	52.0594		2.76253	39.8945		10.7636	42.2118		3.76437	47.0819		11.7633	45.5043		4.76411	56.1303		12.7637	44.2249		5.76464	52.1549		13.764	52.5724		6.76306	51.5465		14.7643	52.4352		7.76314	54.6063		15.7642	55.4533		0.763457	69.3301
0.764924	101.244		8.76581	48.0154		1.7657	45.0271		9.76448	45.9427		2.76392	44.3829		10.7652	42.9126		3.76569	44.6155		11.7644	43.5389		4.76578	53.0257		12.765	46.1664		5.76589	47.2012		13.7657	45.7458		6.76479	50.7949		14.7651	50.8367		7.76412	50.5921		15.7651	53.5178		0.764708	75.6078
0.766036	104.602		8.76699	53.7564		1.76667	44.1801		9.76615	44.6573		2.7658	47.2609		10.7663	47.3145		3.76742	41.9315		11.7662	44.1354		4.76703	57.9972		12.7668	43.2347		5.76665	42.9902		13.7667	46.5958		6.76646	53.0525		14.7663	50.1686		7.76578	37.3596		15.766	45.1583		0.766444	83.0637
0.767633	97.7635		8.76797	51.2065		1.76785	52.2026		9.76789	52.4024		2.76712	48.5045		10.7672	43.0349		3.76888	42.6621		11.7678	48.0124		4.768	60.562		12.7682	44.547		5.76797	54.8718		13.7678	45.3909		6.76743	53.309		14.768	57.0548		7.76752	36.0921		15.7676	39.7156		0.768041	84.4206
0.769369	102.085		8.76943	39.6023		1.76952	52.4829		9.76879	49.2292		2.76788	46.9656		10.7689	43.1274		3.76985	46.1634		11.7686	48.9697		4.76932	46.2707		12.7692	51.2423		5.76964	54.7793		13.7694	42.8411		6.76833	46.5928		14.7693	52.4889		7.76849	49.1189		15.7692	49.7153		0.769013	85.5569
0.77048	97.9335		8.77116	46.6704		1.77111	47.0551		9.76969	47.0998		2.76906	47.738		10.7706	46.1783		3.77103	47.568		11.7696	46.059		4.77113	51.0872		12.7705	42.7307		5.77096	49.9062		13.7712	44.705		6.76986	46.2856		14.7703	55.1759		7.76933	45.6653		15.7704	49.4141		0.770124	89.6516
0.771452	95.4015		8.77255	49.1308		1.77209	42.5786		9.77122	50.0851		2.7708	45.8144		10.7716	43.2974		3.77277	46.8165		11.7713	53.7623		4.77252	61.5164		12.7723	41.2157		5.77193	51.6658		13.7721	44.8243		6.77153	49.6974		14.7715	58.2		7.77085	42.5398		15.7714	44.6215		0.771791	90.7729
0.77298	92.0524		8.77345	46.1067		1.7732	37.8069		9.77289	49.0204		2.77225	49.1606		10.7725	39.5575		3.77437	51.4898		11.7729	54.4125		4.77349	56.679		12.7737	44.4127		5.77318	50.7412		13.773	45.0987		6.77271	43.9266		14.7733	50.6697		7.77252	53.2911		15.7728	52.3368		0.773457	92.2462
0.774786	91.5454		8.77477	38.5525		1.77493	49.5155		9.774	56.1273		2.77323	67.8508		10.774	50.4132		3.77534	57.6393		11.7739	46.1723		4.77467	52.2354		12.7746	41.0189		5.77492	54.0188		13.7745	53.5774		6.77368	53.98		14.7749	51.3109		7.7737	54.3707		15.7746	45.6981		0.774499	82.8758
0.775966	90.9758		8.77651	53.1599		1.7766	52.8676		9.77504	49.8972		2.77441	53.7832		10.7756	54.147		3.77645	57.4992		11.7749	43.6224		4.77641	53.0078		12.7756	47.3175		5.77651	50.8397		13.7762	48.9011		6.77514	46.1425		14.7758	47.4905		7.77467	43.6642		15.776	46.4288		0.775541	82.3568
0.776869	105.467		8.77797	52.0236		1.7775	51.6389		9.7765	54.1709		2.77607	45.895		10.7768	58.0837		3.77819	46.5719		11.7765	41.8778		4.778	52.6827		12.7773	46.232		5.77749	50.5563		13.7774	49.1994		6.77695	46.9328		14.777	51.5942		7.77613	39.5933		15.7769	49.8764		0.777208	88.5541
0.778397	101.399		8.77887	52.2384		1.7784	57.5588		9.77823	55.6949		2.77767	42.349		10.7778	52.5992		3.77978	47.7887		11.7783	54.4184		4.77898	59.5451		12.7789	48.2838		5.7786	50.604		13.7783	46.5242		6.77826	48.9966		14.7786	56.2108		7.77787	44.5917		15.7782	50.5205		0.778944	90.5284
0.780202	97.853		8.78012	50.0732		1.78	53.0674		9.77955	43.4465		2.77871	45.4417		10.7793	57.3083		3.78069	49.5781		11.7794	54.332		4.78009	55.9692		12.7798	55.1372		5.78026	48.7848		13.7798	51.4659		6.77917	39.6649		14.7803	46.0083		7.77926	42.5935		15.7801	51.0126		0.779846	85.2795
0.781313	96.5229		8.78193	36.945		1.7816	38.6897		9.78046	54.0516		2.77982	47.1565		10.781	50.8546		3.78166	52.0833		11.7804	48.5731		4.78189	64.1915		12.7809	46.1306		5.782	47.6784		13.7815	54.32		6.78049	50.8456		14.7814	49.1546		7.78016	46.4706		15.7814	39.3189		0.780749	68.6292
0.782147	96.5646		8.78345	41.6302		1.78278	40.2942		9.78177	46.6525		2.78142	45.218		10.7824	48.1913		3.78326	48.6924		11.7819	51.0842		4.78342	58.1553		12.7825	50.5205		5.78297	46.9149		13.7828	39.307		6.78229	61.0988		14.7824	59.1872		7.78148	40.7147		15.7823	45.0897		0.782277	67.6838
0.783536	97.513		8.78429	47.8812		1.78375	43.6165		9.78358	46.1186		2.78309	42.9902		10.7833	41.7495		3.78485	46.6763		11.7837	59.6972		4.78432	62.0949		12.7843	59.1096		5.78401	45.0957		13.7837	47.6963		6.78368	44.9347		14.7841	64.782		7.78321	39.4114		15.7837	41.5139		0.783944	82.3121
0.785202	111.163		8.78533	44.5708		1.78521	51.9908		9.78504	38.0902		2.7842	40.1212		10.7846	34.7798		3.78596	47.1326		11.7849	65.3874		4.78536	71.8978		12.7854	57.4127		5.78575	46.3721		13.7851	50.0195		6.78458	44.875		14.7858	56.2764		7.78467	37.2343		15.7855	40.2614		0.785055	81.5128
0.786522	110.766		8.78706	41.9523		1.78702	52.975		9.78594	40.9085		2.78517	46.5749		10.7863	35.3882		3.78694	47.3652		11.7858	49.596		4.78696	67.6987		12.7864	53.5387		5.78742	44.2696		13.7869	45.6892		6.78583	51.8089		14.7868	56.3182		7.78558	41.5616		15.7869	37.8129		0.786027	77.782
0.787425	101.995		8.78852	44.6513		1.78827	59.1067		9.78719	54.8598		2.78684	49.8465		10.7878	48.0542		3.78846	47.2579		11.7873	39.31		4.78849	58.0479		12.7879	52.3547		5.78839	39.7305		13.7883	51.0663		6.78771	49.8585		14.7877	55.51		7.78683	45.7876		15.7877	53.5894		0.787555	71.7249
0.788744	98.1631		8.78956	48.752		1.78924	54.3528		9.78907	58.2149		2.78857	51.0872		10.7888	53.8011		3.7902	49.3246		11.7891	49.3127		4.7896	61.7579		12.7896	40.6401		5.78929	39.5993		13.7892	46.4497		6.78917	53.1659		14.7892	64.4331		7.78863	51.126		15.7888	46.6346		0.789291	77.6597
0.79048	88.1634		8.79068	58.0002		1.79063	45.7995		9.79053	51.961		2.78962	49.1517		10.79	43.5956		3.79145	55.4444		11.7903	67.645		4.79064	66.9949		12.7909	35.266		5.79082	42.6144		13.7905	45.0748		6.78993	54.8956		14.7908	57.9346		7.79016	57.3113		15.7905	42.1044		0.79061	71.5966
0.791938	107.987		8.79227	56.5747		1.79236	52.0922		9.79129	43.3898		2.79045	54.9195		10.7918	47.2042		3.79242	53.8786		11.7911	59.3035		4.79217	69.8042		12.7918	41.1411		5.79242	48.2391		13.7924	48.0214		6.79104	41.4513		14.792	55.5338		7.79092	49.8555		15.7919	43.8222		0.791513	62.8047
0.792911	107.563		8.79394	50.1239		1.79375	51.293		9.7924	42.1313		2.79191	51.2512		10.7933	50.2521		3.79381	60.0998		11.7924	46.3632		4.79391	64.7015		12.7932	53.2852		5.7936	59.0858		13.7937	53.813		6.79271	49.9002		14.7929	63.5533		7.79203	53.5774		15.793	41.2813		0.792833	76.3952
0.794091	92.5981		8.79512	44.5827		1.79465	47.4249		9.79407	46.5451		2.79357	48.9369		10.7941	48.1019		3.79562	52.641		11.7942	40.7773		4.79516	59.0172		12.795	48.0214		5.79464	49.5751		13.7946	53.6401		6.79424	48.2122		14.7944	50.8307		7.7937	50.5056		15.7941	42.1909		0.794638	73.5858
0.795827	89.8365		8.79602	51.0991		1.79597	45.3969		9.79552	45.2448		2.79475	55.5547		10.7952	49.6527		3.79694	54.5228		11.7955	44.3829		4.79606	61.5104		12.7963	48.7461		5.79603	45.555		13.7957	48.8564		6.79528	44.6305		14.7961	48.9876		7.79523	57.2427		15.7958	44.702		0.796027	66.4312
0.797425	93.7791		8.79755	48.1049		1.79778	38.1529		9.79657	42.7844		2.79573	51.9133		10.7968	43.8073		3.79784	54.2604		11.7965	42.2118		4.79745	62.0979		12.7971	47.0282		5.79783	46.8523		13.7974	42.1551		6.79639	47.3265		14.7975	54.8449		7.79627	48.6536		15.7974	40.157		0.796999	69.7863
0.798397	90.5582		8.79936	49.2978		1.79917	39.5695		9.79768	50.1478		2.79718	48.4508		10.7984	42.0686		3.79916	51.457		11.7977	52.0952		4.79925	57.016		12.7984	48.5671		5.79915	49.0771		13.7989	40.6163		6.79799	54.0755		14.7984	64.1915		7.79731	39.0446		15.7985	42.7158		0.798249	83.5498
0.799508	99.195		8.80054	49.0115		1.8	49.2083		9.79928	53.488		2.79892	46.223		10.7993	41.7585		3.80103	46.2051		11.7994	49.9897		4.80064	56.9385		12.8001	43.2974		5.80005	51.1975		13.7999	49.9509		6.79972	49.9748		14.7997	66.3209		7.79891	50.8665		15.7995	44.7557		0.800055	79.0882
0.801244	104.161		8.80144	47.1893		1.80111	48.3554		9.80094	52.9034		2.80031	41.669		10.8004	43.9326		3.80242	46.7897		11.801	40.7445		4.80148	68.8469		12.8014	46.3513		5.80137	54.9821		13.801	45.4566		6.80083	43.5688		14.8015	61.078		7.80064	44.5977		15.8011	49.1994		0.801513	74.4537
0.802911	97.8768		8.80297	43.8879		1.80285	46.8284		9.80205	51.0067		2.80121	45.728		10.802	42.5995		3.80319	55.5905		11.8019	47.8066		4.80286	70.359		12.8024	46.0202		5.80318	51.8477		13.8026	46.396		6.80181	44.9794		14.8029	48.2898		7.80183	39.9661		15.8028	41.6839		0.802277	83.4603
0.803813	93.2841		8.80477	49.089		1.80431	49.4529		9.80309	46.8523		2.80253	52.3487		10.8038	45.6594		3.80437	48.3613		11.803	49.1338		4.80474	56.8252		12.8036	41.3082		5.80464	53.6818		13.8043	46.6793		6.80326	49.945		14.8038	52.3427		7.80273	42.7218		15.804	41.0338		0.803388	76.1447
0.804716	84.9395		8.80602	51.0633		1.80528	48.2689		9.80462	53.5387		2.80427	58.9933		10.8049	46.5511		3.8061	38.3497		11.8047	45.552		4.80606	65.9749		12.8054	46.8463		5.80554	48.412		13.8054	41.7615		6.80507	43.2974		14.8051	50.1537		7.80433	43.5628		15.8049	49.8525		0.805124	80.1738
0.806244	89.3951		8.80679	61.2599		1.80639	53.1927		9.80636	49.3574		2.80573	55.5249		10.8059	43.2705		3.80749	46.3155		11.8064	43.5986		4.80682	63.4877		12.8069	41.332		5.80686	46.9179		13.8064	40.6133		6.80632	47.3414		14.807	46.4198		7.80613	51.0096		15.8065	44.5768		0.806583	70.7168
0.807911	96.2067		8.80811	55.3817		1.80806	53.4134		9.80754	55.6114		2.80663	48.7431		10.8074	44.5827		3.80853	53.0257		11.8074	50.4013		4.80807	48.7043		12.8079	38.2751		5.80867	47.0402		13.8079	40.2017		6.80722	43.7179		14.8084	45.2567		7.80731	47.0968		15.8083	41.9464		0.807555	79.2731
0.809022	87.057		8.80984	44.3471		1.80972	52.4501		9.80851	52.1996		2.80781	48.588		10.8092	43.2377		3.80964	51.3019		11.8085	51.2393		4.80974	55.847		12.809	48.078		5.81012	46.5153		13.8096	37.449		6.80875	40.2047		14.8093	54.7823		7.80821	46.8523		15.8094	46.8225		0.808666	77.2422
0.809994	75.6436		8.81116	46.6674		1.81084	56.4136		9.81004	49.3992		2.80962	56.005		10.8104	48.9906		3.81131	56.0587		11.8101	47.0611		4.81113	65.5246		12.8107	50.9232		5.81089	44.365		13.8108	42.8709		6.81056	44.0757		14.8104	49.3813		7.80974	47.8722		15.8103	45.0361		0.810332	75.2172
0.811522	80.9522		8.81213	47.5442		1.81181	52.8169		9.81184	54.2484		2.81114	51.1379		10.8113	50.5474		3.81298	51.621		11.8118	46.3692		4.8121	69.8162		12.8123	44.702		5.812	46.6107		13.8118	37.8516		6.81174	45.0778		14.812	50.607		7.81162	39.3637		15.8117	50.5205		0.811999	63.1149
0.813327	92.0762		8.81338	54.5526		1.8134	51.2035		9.81302	46.0322		2.81198	38.7105		10.8128	45.8592		3.81402	47.9349		11.8128	47.4637		4.81328	56.7297		12.8134	48.7669		5.81367	54.6958		13.8133	36.441		6.8125	47.9826		14.8135	51.3824		7.8128	44.0907		15.8133	49.432		0.81311	70.0428
0.814577	102.625		8.81512	55.3787		1.81507	52.5843		9.81379	49.3604		2.81302	45.0808		10.8146	40.3061		3.81506	43.6373		11.8136	46.1872		4.81502	54.8598		12.8144	43.0916		5.81512	53.2255		13.8151	41.4394		6.81389	47.0223		14.8145	52.7722		7.81356	41.4573		15.8146	53.8667		0.814083	69.3599
0.81548	103.454		8.81665	45.0539		1.81625	49.6825		9.81518	54.3618		2.81469	51.6807		10.8158	37.8695		3.81666	46.4765		11.8151	54.7733		4.81661	51.8089		12.8161	39.5784		5.81617	50.8307		13.8162	41.7436		6.81556	43.1065		14.8156	48.1824		7.81495	51.1588		15.8155	41.0099		0.81568	81.3965
0.816869	101.265		8.81762	41.6929		1.81722	51.3317		9.81684	52.1787		2.81628	48.3733		10.8166	43.5419		3.81839	49.4529		11.8168	47.8782		4.81766	53.3359		12.8178	35.8833		5.81728	50.8098		13.8171	46.9298		6.81688	45.2687		14.8172	47.9021		7.81662	52.7126		15.8169	44.1742		0.817416	81.4413
0.818675	100.638		8.81873	42.9663		1.81875	57.696		9.81816	46.0023		2.81732	46.3632		10.8179	38.7225		3.8195	42.7218		11.818	46.2171		4.8187	54.3439		12.8187	40.1689		5.81894	39.7603		13.8185	48.6119		6.81785	52.0863		14.8189	54.5258		7.81794	49.4022		15.8186	42.7755		0.818596	70.2426
0.819994	85.8372		8.82047	47.404		1.82056	55.2923		9.81914	48.1317		2.81837	48.2331		10.8196	44.7527		3.82041	48.7461		11.819	46.4676		4.82036	49.9778		12.8196	42.7367		5.82061	36.4052		13.8201	40.8459		6.8191	51.9371		14.82	49.6467		7.81891	49.2829		15.8201	41.3827		0.819499	72.6703
0.820897	88.6406		8.82213	45.8115		1.82167	45.7101		9.82046	47.4189		2.81996	52.7275		10.8209	46.2767		3.82201	57.6692		11.8204	42.9216		4.82203	52.3726		12.8211	43.3153		5.82172	45.7906		13.8214	43.2407		6.82083	51.4958		14.821	45.0838		7.82023	54.0457		15.821	40.6341		0.821027	69.333
0.822286	95.7385		8.82311	46.4884		1.82243	40.1272		9.82219	51.4421		2.82163	50.9053		10.8219	49.6915		3.82381	52.7185		11.8221	38.7911		4.82314	56.9027		12.8228	50.8098		5.82269	52.7245		13.8224	53.3031		6.82236	49.6855		14.8226	39.5009		7.82196	48.5999		15.8222	42.176		0.822902	67.1917
0.824091	88.7599		8.82415	39.2623		1.82382	40.8071		9.82372	52.0117		2.82281	52.8229		10.8231	47.6873		3.82485	48.245		11.8235	43.1274		4.82411	60.8662		12.824	48.3554		5.82422	53.4581		13.8237	53.0168		6.82333	47.41		14.8244	43.2646		7.82349	54.0993		15.8239	45.4953		0.824013	81.1341
0.82548	101.545		8.82588	46.1604		1.82556	53.652		9.82462	52.7424		2.82378	48.3882		10.8249	47.5263		3.82569	54.0337		11.8244	48.5641		4.82578	71.7905		12.8249	44.8243		5.82603	47.4696		13.8254	53.8936		6.82451	55.6054		14.8256	52.1728		7.82453	50.2849		15.8255	45.719		0.824847	77.1855
0.826314	91.6676		8.82755	58.4148		1.82681	60.8811		9.8258	55.3579		2.82524	39.3995		10.8264	40.2166		3.82714	59.7687		11.8257	46.6704		4.82752	75.2201		12.8264	43.5479		5.82721	45.8562		13.8269	39.6351		6.82625	51.7791		14.8265	61.3136		7.82564	47.5293		15.8266	43.6373		0.826235	72.7717
0.827424	91.1547		8.82852	57.6602		1.82778	55.164		9.82754	62.7093		2.82698	43.8372		10.8274	40.9175		3.82881	47.413		11.8275	44.9645		4.82856	55.3966		12.8282	41.5587		5.82818	44.0489		13.8278	41.7108		6.82785	61.2032		14.828	61.8086		7.82731	52.632		15.8276	47.4935		0.827902	84.1701
0.829091	86.04		8.82942	60.052		1.8291	46.9895		9.82914	60.1743		2.8283	58.9546		10.8285	40.9562		3.83006	57.9823		11.8289	43.8759		4.82939	53.4104		12.8295	42.3907		5.82971	48.3584		13.829	43.4107		6.82889	51.1438		14.8298	54.9105		7.82898	49.7869		15.8294	39.5575		0.829221	76.9648
0.83055	87.2687		8.83102	58.3551		1.83084	49.1278		9.83011	55.3102		2.8292	55.5607		10.8302	43.9565		3.83103	47.0432		11.8299	45.3194		4.83085	60.0043		12.8304	39.8975		5.83151	51.2393		13.8308	40.6699		6.82993	49.942		14.831	56.2466		7.83002	44.1503		15.831	45.7399		0.830124	62.2739
0.831591	95.1629		8.83262	49.5662		1.83229	52.1966		9.83122	64.5703		2.83059	52.9034		10.8319	54.3409		3.83235	54.666		11.8311	43.4196		4.83252	65.0594		12.8317	52.1757		5.83262	46.4706		13.8324	45.3611		6.83167	46.7777		14.8318	62.1009		7.83106	46.9239		15.8319	47.1058		0.831444	69.4822
0.832702	103.49		8.8338	49.7779		1.83327	45.0301		9.83296	52.4203		2.83246	57.0757		10.8329	54.5258		3.83409	62.0353		11.8329	49.1159		4.8337	65.7751		12.8335	50.0851		5.83339	50.112		13.8333	51.4809		6.83333	47.9408		14.8331	55.337		7.83273	47.8514		15.8328	48.6596		0.83318	74.0988
0.834369	104.08		8.83477	56.8729		1.83445	44.8154		9.83462	53.7146		2.83371	51.3526		10.8339	48.8982		3.83555	60.0163		11.8344	53.0913		4.83467	58.7428		12.8349	48.5254		5.83478	46.733		13.8344	52.5038		6.83424	44.362		14.8348	54.4542		7.83439	52.5933		15.8344	48.9996		0.834708	75.2589
0.836036	102.216		8.8363	45.1882		1.83618	50.0971		9.83552	57.2904		2.83448	51.0544		10.8356	50.7054		3.83652	60.3354		11.8352	55.1581		4.83606	57.9823		12.8358	53.2792		5.83651	48.8027		13.8362	55.0507		6.83514	44.4992		14.8361	63.4191		7.83537	60.7917		15.8361	57.3083		0.83561	67.7196
0.837077	89.2669		8.83804	49.423		1.83778	52.638		9.83643	52.6022		2.8358	52.629		10.8373	50.8993		3.8377	61.1108		11.8362	48.087		4.83779	54.2693		12.8371	48.8296		5.83776	50.5862		13.8378	51.8775		6.83674	50.5772		14.8371	61.0601		7.83627	65.7513		15.8371	56.1929		0.836791	71.2596
0.838119	86.0042		8.83936	56.7983		1.83875	54.4125		9.83803	44.4694		2.83753	51.0126		10.8382	58.1821		3.83944	54.153		11.838	43.2049		4.83918	60.2578		12.8389	51.3228		5.83874	56.7506		13.8387	51.3765		6.83833	60.6664		14.8383	60.7797		7.8378	57.2069		15.8382	48.0959		0.838527	61.8862
0.839647	91.5185		8.84026	62.42		1.83986	61.1615		9.83962	57.4097		2.83885	54.5377		10.8391	55.1044		3.84096	46.3423		11.8395	51.1021		4.84016	64.1975		12.8404	56.1363		5.84005	57.5648		13.8396	57.2874		6.83952	54.8211		14.8401	53.8876		7.83946	59.2975		15.8397	57.4694		0.840124	68.0387
0.841383	108.369		8.84158	53.2046		1.8416	67.311		9.84073	64.6866		2.83982	59.1603		10.8407	54.9195		3.84194	52.0236		11.8405	48.2331		4.84141	59.1842		12.8411	63.5772		5.84179	59.8701		13.8412	60.1415		6.84049	53.9443		14.8416	55.1253		7.84058	52.8855		15.8414	53.9114		0.841097	72.885
0.842564	106.952		8.84338	55.2952		1.8432	63.4728		9.84177	57.699		2.84107	61.752		10.8424	58.6444		3.84312	50.6667		11.8416	59.5898		4.84314	61.1436		12.8423	49.1039		5.84332	66.6012		13.8429	53.813		6.84195	58.1583		14.8426	68.1908		7.84155	51.3258		15.8428	54.323		0.842208	67.9045
0.843466	107.158		8.84484	58.5102		1.8441	55.7426		9.84323	60.1385		2.84274	62.2142		10.8435	53.6908		3.84485	55.7993		11.8432	53.5446		4.84467	71.4087		12.844	56.4434		5.84422	66.0286		13.844	61.585		6.84375	53.7325		14.8437	61.9279		7.84308	52.7036		15.8437	48.8862		0.843944	73.4546
0.845063	109.299		8.84574	72.4257		1.84507	56.5061		9.84504	66.5356		2.84434	60.4576		10.8445	55.6263		3.84645	50.6756		11.8449	62.0741		4.84564	73.0073		12.8455	64.3197		5.8454	60.0938		13.845	69.9355		6.84507	59.5421		14.8454	49.7183		7.84481	51.967		15.8451	55.5428		0.84561	75.6705
0.846869	96.0725		8.847	62.3842		1.84667	67.7554		9.84629	63.6756		2.84538	66.464		10.846	53.4432		3.84735	57.0936		11.846	70.1263		4.84682	70.8003		12.8465	55.9543		5.84714	59.6196		13.8464	64.5971		6.84597	78.4917		14.847	56.9146		7.84613	57.6274		15.8469	57.0787		0.846513	78.1518
0.84798	105.84		8.84887	68.328		1.84827	59.4973		9.84726	67.0665		2.84649	59.5272		10.8477	62.6705		3.84832	66.8935		11.847	69.2406		4.84863	70.9644		12.8476	60.4606		5.84874	74.5938		13.8482	60.0192		6.84736	71.3938		14.8481	65.9063		7.84703	66.467		15.8482	54.4423		0.847416	70.866
0.848744	111.909		8.85033	76.1954		1.84931	69.4732		9.84858	77.1825		2.84816	66.2941		10.849	79.5743		3.84999	72.8731		11.8485	79.7473		4.85022	73.6753		12.8492	76.5324		5.84978	70.1114		13.8495	71.1135		6.84917	74.4477		14.8491	70.6751		7.84835	67.3558		15.8491	59.4914		0.849013	76.0075
0.850202	107.027		8.85109	80.0933		1.85035	76.1715		9.85039	71.3342		2.84982	69.8072		10.85	70.3172		3.85152	73.2101		11.8503	80.1618		4.85106	80.2096		12.8509	67.9463		5.85082	76.0134		13.8504	76.7411		6.85056	75.9568		14.8508	61.2867		7.85016	62.5483		15.8504	59.3512		0.85061	96.0785
0.851938	110.957		8.85227	80.7523		1.85188	71.2537		9.85178	83.9106		2.85087	79.7145		10.8513	64.8774		3.85263	82.6431		11.8515	74.7668		4.85203	85.9356		12.8521	66.4342		5.85256	75.4438		13.8518	79.7533		6.85146	77.3972		14.8525	62.6407		7.85155	74.0063		15.8523	67.8627		0.851722	88.3931
0.853119	121.401		8.85401	88.6734		1.85368	73.9169		9.85268	93.9819		2.85184	91.5931		10.8531	87.397		3.85367	86.8005		11.8524	85.6374		4.8537	86.8363		12.853	69.2644		5.85422	79.5326		13.8536	80.3796		6.85278	80.5167		14.8535	69.7893		7.85252	66.0614		15.8537	70.3053		0.852694	85.023
0.854091	124.759		8.85547	103.412		1.85486	97.4653		9.854	100.033		2.8535	92.956		10.8545	90.6805		3.8552	90.4091		11.8539	82.5268		4.85529	103.672		12.8546	73.3651		5.85512	86.4605		13.855	70.7914		6.85458	82.67		14.8544	76.9201		7.85377	68.4204		15.8544	69.8758		0.854221	81.65
0.85548	121.136		8.85644	111.417		1.85577	92.9858		9.8558	96.8181		2.85524	86.723		10.8554	85.6284		3.85694	93.0693		11.8558	83.168		4.85634	107.45		12.8563	72.2289		5.85603	90.6924		13.8559	95.4075		6.85597	88.8106		14.856	75.8106		7.85558	89.0134		15.8556	80.2096		0.856027	83.8689
0.857216	134.291		8.85755	110.412		1.85722	102.434		9.85719	100.895		2.85621	89.6009		10.8567	89.3116		3.85812	100.51		11.8569	87.2538		4.85738	98.6373		12.8575	89.41		5.85762	89.2221		13.8572	94.0207		6.85674	101.056		14.8577	80.8597		7.85703	98.0409		15.8573	73.7528		0.857277	103.314
0.858674	158.284		8.85922	99.4873		1.85903	112.326		9.85802	98.5866		2.85705	105.503		10.8585	98.0796		3.85909	102.613		11.8577	99.7497		4.85897	98.8312		12.8584	100.74		5.85929	99.7647		13.859	92.783		6.85785	97.4951		14.8588	87.0957		7.85787	91.3098		15.8587	82.4224		0.858249	100.683
0.859647	155.46		8.86088	111.077		1.86035	124.613		9.85921	114.238		2.85857	98.3451		10.86	111.822		3.86055	100.808		11.8591	106.973		4.86064	110.003		12.86	108.637		5.8604	102.318		13.8604	100.967		6.85958	115.004		14.8597	76.771		7.85898	100.018		15.8597	89.744		0.859569	116.415
0.860827	162.334		8.86199	117.936		1.86125	128.437		9.86087	112.586		2.86031	97.7874		10.8607	119.886		3.86228	99.6483		11.8608	104.51		4.86182	137.947		12.8618	117.39		5.86137	117.62		13.8612	110.054		6.86104	118.21		14.8612	83.4275		7.86065	113.018		15.8609	106.162		0.861374	116.904
0.862563	161.09		8.86297	138.201		1.86264	133.068		9.86233	117.378		2.86149	117.42		10.8618	126.298		3.8636	131.508		11.8621	108.002		4.86279	147.711		12.863	113.913		5.8629	140.971		13.8624	131.306		6.86208	136.14		14.8629	88.3573		7.86217	130.751		15.8626	110.728		0.862763	130.181
0.864161	182.342		8.86456	149.241		1.86452	143.843		9.8633	140.205		2.86239	143.113		10.8636	130.954		3.86451	142.794		11.863	127.485		4.86425	141.276		12.8637	129.066		5.86464	140.08		13.8641	147.7		6.86319	141.69		14.8643	101.981		7.86321	125.577		15.8642	115.845		0.863666	139.758
0.865133	196.237		8.8663	153.297		1.86577	163.932		9.86448	139.331		2.86385	130.772		10.865	142.442		3.86589	152.418		11.8643	140.954		4.86606	148.385		12.8651	134.577		5.86596	144.338		13.8655	147.342		6.86486	136.423		14.8652	115.55		7.86433	129.188		15.8653	134.834		0.864985	142.591
0.866244	214.748		8.86748	174.74		1.86653	166.27		9.86615	162.549		2.86559	141.568		10.866	149.277		3.86777	158.755		11.866	157.356		4.86738	152.501		12.8668	165.367		5.86686	153.291		13.8665	171.406		6.86653	151.645		14.8665	120.966		7.86592	145.343		15.8663	154.064		0.866791	151.562
0.86798	212.637		8.86838	185.751		1.86778	174.004		9.86782	174.481		2.86698	179.607		10.8671	176.058		3.86902	175.548		11.8676	157.89		4.86828	177.779		12.8681	179.16		5.86825	155.591		13.8676	167.729		6.86757	176.577		14.8683	115.732		7.86759	162.629		15.8679	159.882		0.86818	159.814
0.869577	230.605		8.86991	196.437		1.86945	175.54		9.86886	184.373		2.86788	203.654		10.8688	181.203		3.86978	191.892		11.8685	168.919		4.86967	171.692		12.8691	177.475		5.87006	173.523		13.8693	173.992		6.86861	180.028		14.8697	120.337		7.8687	185.566		15.8696	158.352		0.869013	189.24
0.87048	251.947		8.87179	216.758		1.8709	213.979		9.86983	204.966		2.8692	208.605		10.8704	197.653		3.87103	192.569		11.8697	192.399		4.87154	215.365		12.8703	186.461		5.87137	205.094		13.871	204.525		6.87021	190.317		14.8706	118.846		7.86974	209.186		15.8708	171.501		0.870194	189.822
0.871452	268.331		8.8729	260.252		1.87188	240.25		9.8715	237.494		2.871	213.713		10.8716	216.985		3.87277	194.561		11.8714	224.56		4.87279	261.577		12.8721	203.633		5.87228	223.146		13.872	238.493		6.87194	205.455		14.872	110.859		7.87127	229.922		15.8717	196.666		0.87186	199.35
0.873119	293.792		8.87373	261.201		1.87306	241.804		9.87323	252.788		2.87239	230.525		10.8726	224.16		3.87416	203.955		11.873	250.449		4.87356	280.711		12.8736	230.915		5.87367	267.246		13.873	238.467		6.87313	230.942		14.8738	123.182		7.87301	225.893		15.8733	199.139		0.873319	231.5
0.874647	329.457		8.87512	293.294		1.87472	247.181		9.87434	258.186		2.87337	242.048		10.8741	230.343		3.87513	253.846		11.874	249.781		4.87488	290.869		12.8746	261.263		5.87547	277.988		13.8746	256.417		6.8741	245.997		14.8752	150.02		7.87419	246.68		15.8751	204		0.874291	250.924
0.875688	367.601		8.87679	319.756		1.87639	299.7		9.87525	289.255		2.87462	272.486		10.8759	273.446		3.87638	269.751		11.8751	271.013		4.87654	318.208		12.8757	292.193		5.87686	308.954		13.8763	299.536		6.87563	278.361		14.876	165.113		7.87516	273.783		15.8762	258.308		0.875471	244.914
0.87673	405.584		8.87811	375.275		1.87743	354.556		9.87684	313.171		2.87635	306.792		10.877	307.776		3.87805	291.582		11.8768	287.633		4.87786	348.013		12.8775	326.198		5.87762	346.74		13.8775	338.389		6.87736	302.437		14.8771	174.925		7.87669	322.136		15.877	281.889		0.877138	271.833
0.878258	419.103		8.87908	415.545		1.87847	391.421		9.87865	346.931		2.87781	354.768		10.878	342.195		3.87964	334.214		11.8785	329.955		4.87884	398.259		12.8791	347.396		5.87881	377.028		13.8784	366.298		6.87854	350.56		14.8788	181.218		7.87849	371.418		15.8785	284.868		0.878735	300.29
0.879994	487.249		8.88033	454.891		1.88007	429.38		9.87976	438.953		2.87864	380.75		10.8795	369.337		3.88062	363.491		11.8794	378.776		4.88009	403.469		12.88	392.444		5.88047	411.206		13.88	404.68		6.87931	414.033		14.8802	189.336		7.87967	409.175		15.8801	321.957		0.879846	362.215
0.881244	569.692		8.88206	505.241		1.88181	491.367		9.88059	469.265		2.87975	410.618		10.8813	437.402		3.88173	397.4		11.8803	419.028		4.88175	477.139		12.8811	440.862		5.88193	477.568		13.8818	455.908		6.8807	447.829		14.8813	205.187		7.88044	430.304		15.8813	373.98		0.880819	402.265
0.882147	602.877		8.88359	584.318		1.88292	589.274		9.88198	494.723		2.88142	477.529		10.8825	509.425		3.88339	410.084		11.8819	474.276		4.88335	541.274		12.8828	479.829		5.88297	528.772		13.8829	518.372		6.88243	521.486		14.8824	230.307		7.88183	466.728		15.8823	397.654		0.882416	435.676
0.883605	662.189		8.88449	650.242		1.88389	671.243		9.88372	561.512		2.88302	550.602		10.8833	537.394		3.88506	479.256		11.8835	515.987		4.88439	606.631		12.8845	582.117		5.88408	579.963		13.8837	567.527		6.88368	577.574		14.884	265.662		7.88356	513.935		15.8837	419.887		0.884152	518.295
0.885411	774.45		8.88568	738.014		1.88549	684.031		9.88497	663.892		2.88399	615.366		10.8847	550.474		3.8861	555.001		11.8846	570.065		4.88543	655.768		12.8854	657.047		5.88575	631.176		13.8851	582.952		6.88465	618.799		14.8857	273.422		7.88488	596.253		15.8854	460.814		0.885333	582.236
0.88673	866.32		8.88741	823.479		1.88722	751.671		9.88594	723.377		2.8851	684.592		10.8864	637.358		3.88707	609.81		11.8856	631.915		4.8871	718.737		12.8863	702.924		5.88742	742.744		13.8869	693.918		6.88597	685.394		14.8868	277.347		7.88578	672.973		15.8869	538.873		0.886235	634.933
0.887633	978.393		8.88901	938.102		1.88827	889.266		9.88726	810.989		2.8867	729.786		10.8877	782.216		3.88874	658.598		11.8871	705.105		4.88884	852.345		12.8879	748.629		5.88846	855.312		13.888	813.989		6.88771	742.232		14.8878	313.737		7.8871	747.457		15.8878	611.755		0.887833	705.546
0.889022	1068.33		8.88998	1011.92		1.8891	969.103		9.88907	917.75		2.88844	855.703		10.8886	812.385		3.89048	755.876		11.8889	792.284		4.88988	974.883		12.8896	878.434		5.8895	927.792		13.889	877.226		6.88924	884.584		14.8894	325.306		7.88891	835.882		15.889	658.494		0.889638	801.29
0.890897	1179.51		8.89109	1132.06		1.89056	1024.99		9.89046	1018.25		2.88955	974.695		10.8899	889.895		3.89152	886.561		11.8901	922.602		4.89085	1061.4		12.8907	963.839		5.8911	967.108		13.8904	942.175		6.89014	1012.12		14.8911	356.295		7.89037	972.44		15.8907	700.279		0.890749	938.856
0.892216	1332.36		8.89283	1221.15		1.89222	1210.3		9.89143	1109.62		2.89045	1103.5		10.8916	1000.76		3.89235	961.885		11.8911	1006.28		4.89252	1149.33		12.8916	1030.65		5.89283	1079.15		13.8921	1047.74		6.89132	1059.05		14.8922	401.755		7.89134	1118.25		15.8923	803.289		0.891513	1010.51
0.89298	1437.6		8.8945	1355.34		1.89347	1311.18		9.89261	1195.92		2.89198	1116.44		10.8931	1144.14		3.89388	1001.3		11.8924	1095.74		4.89425	1282.23		12.8931	1120.04		5.89394	1245.51		13.8936	1201.61		6.89313	1148.15		14.8932	458.762		7.89252	1206.46		15.8933	929.9		0.892972	1033.78
0.894161	1594.52		8.89533	1512.64		1.89445	1452.54		9.89435	1307.81		2.89378	1253.87		10.8941	1281.23		3.89555	1121.58		11.8942	1206.1		4.89523	1439		12.8949	1247.31		5.89492	1353.43		13.8946	1293.77		6.89472	1308.86		14.8948	457.554		7.89426	1307.27		15.8944	971.131		0.894638	1142.43
0.895897	1757.06		8.8963	1571.99		1.89577	1539.4		9.89594	1480.41		2.89496	1482.41		10.8953	1416.7		3.89673	1218.05		11.8956	1370.04		4.89613	1511.72		12.8962	1448.23		5.89651	1445.84		13.8958	1389.03		6.8957	1462.27		14.8965	469.418		7.89585	1414.68		15.8962	1018.78		0.895888	1291.46
0.897286	1927.45		8.8979	1718.52		1.89757	1697.89		9.89691	1624.81		2.89587	1600.83		10.897	1490.18		3.89763	1304.91		11.8965	1501.25		4.89766	1555.56		12.8971	1582.66		5.89825	1579.35		13.8975	1503.31		6.89681	1587.01		14.8977	530.677		7.89683	1553.24		15.8978	1110.03		0.89686	1415.96
0.898258	2056.56		8.8995	1883.62		1.89896	1888.39		9.89802	1719.75		2.89739	1661.53		10.8986	1591.25		3.89909	1357.02		11.8978	1562.77		4.89932	1769.25		12.8985	1652.5		5.89936	1764.59		13.899	1707.19		6.89854	1718.31		14.8985	584.103		7.89787	1682.82		15.8987	1241.6		0.89818	1557.31
0.899439	2189.86		8.90061	2082.66		1.89993	2074.83		9.89976	1860.92		2.8992	1786.69		10.8996	1792.01		3.90082	1510.16		11.8996	1696.19		4.9005	1975.86		12.9003	1806.8		5.90019	1868.35		13.9	1935.35		6.90014	1875.87		14.8999	609.059		7.8996	1739.17		15.8996	1324.72		0.899916	1687.14
0.901105	2389		8.90165	2236.63		1.90118	2175.66		9.90136	2094.49		2.90038	2046.79		10.9007	1931.81		3.90221	1713.09		11.901	1917.22		4.90147	2115.91		12.9016	2018.36		5.90158	2003.19		13.9012	2002.9		6.90104	2040.25		14.9016	653.633		7.90127	1943.55		15.9012	1418.27		0.901444	1775.15
0.902702	2638.68		8.90318	2348.49		1.90292	2305.12		9.90226	2247.92		2.90114	2206.43		10.9025	2085.09		3.90319	1831.38		11.9019	2023.4		4.90286	2287.57		12.9025	2205.6		5.90325	2159.79		13.9029	2157.18		6.90202	2119.53		14.9029	683.486		7.90217	2184.56		15.9028	1573.14		0.902346	1947.05
0.903744	2860.8		8.90491	2561.1		1.90445	2505.92		9.90323	2292.84		2.90253	2282.23		10.9041	2284.99		3.90444	1863.77		11.903	2098.52		4.9046	2407.06		12.9039	2247.82		5.9045	2345.31		13.9045	2402.51		6.90361	2307.4		14.9038	707.326		7.90308	2262.1		15.9039	1715.26		0.903527	2075.37
0.904855	3054.67		8.90616	2813.02		1.90535	2754.13		9.90483	2424.91		2.90427	2436.99		10.905	2501.37		3.90624	2055.42		11.9047	2308.4		4.90599	2580.41		12.9057	2382.05		5.90547	2518.46		13.9054	2588.28		6.90521	2517.07		14.9052	750.218		7.90467	2378.24		15.905	1832.37		0.905263	2164.26
0.906452	3150.36		8.90713	2982.26		1.90653	2907.05		9.90643	2718.81		2.90559	2725.29		10.9059	2592.06		3.9077	2228.07		11.9062	2470.96		4.90689	2745.88		12.9071	2677.65		5.90679	2604.12		13.9064	2654.7		6.90632	2705.16		14.907	836.222		7.90634	2648.17		15.9065	1922.46		0.90686	2376.61
0.908188	3432.61		8.90852	3119.28		1.90834	3058.78		9.90754	2973.66		2.90649	2930.38		10.9075	2663.39		3.9086	2428.61		11.9071	2563.08		4.90821	2875.93		12.9079	2916.5		5.9086	2792.44		13.908	2759.61		6.90729	2898.57		14.9083	890.483		7.90745	2837.19		15.9082	2001.81		0.907833	2526.06
0.9093	3771.15		8.91033	3315.85		1.90993	3366.36		9.90858	3089.14		2.90781	3049.42		10.9091	2892.99		3.90985	2514.46		11.9083	2763.83		4.90995	3054.95		12.9091	2952.88		5.91006	3003.77		13.9096	3030.95		6.90882	3004.66		14.9093	906.581		7.90842	2944.72		15.9094	2098.2		0.908944	2722.77
0.910272	3903.02		8.91165	3552.97		1.9107	3627.12		9.91011	3199.87		2.90955	3239.25		10.9102	3113.18		3.91166	2612.54		11.9099	2960.28		4.91141	3282.85		12.9107	3046.34		5.91096	3230.68		13.9106	3241.78		6.91063	3178.65		14.9105	922.731		7.90995	3106.28		15.9103	2238.96		0.91068	2885.06
0.911869	4012.54		8.91255	3690.04		1.91174	3701.18		9.91184	3416.71		2.911	3431.77		10.9112	3261.23		3.91312	2803.27		11.9116	3179.38		4.91231	3524.04		12.9122	3385.93		5.91214	3354.22		13.9117	3456.33		6.91188	3469.63		14.9122	1001.58		7.91169	3316.35		15.9118	2286.7		0.912346	3085.22
0.913675	4244.09		8.91394	3838.77		1.9134	3820.49		9.91309	3618.51		2.91205	3610.2		10.9127	3379.88		3.91395	2986.86		11.9127	3401.11		4.91356	3615.75		12.9132	3516.9		5.91387	3465.91		13.9132	3525.19		6.91278	3662.64		14.9138	1106.57		7.91301	3512.06		15.9136	2503.76		0.91318	3257.33
0.914716	4573.58		8.91581	4100.95		1.91493	4108.52		9.914	3911.41		2.91316	3746.18		10.9145	3596.7		3.91506	3084.27		11.9137	3602.76		4.91536	3809.69		12.9143	3599.79		5.91547	3706.39		13.915	3696.19		6.91417	3776.3		14.9147	1115.09		7.91391	3680.43		15.9149	2746.81		0.914152	3432.78
0.91548	4832.28		8.91713	4400.76		1.91597	4365.01		9.91546	3981.06		2.91489	3939.46		10.9157	3826.61		3.91673	3206.89		11.9152	3678.93		4.91689	4089.71		12.9159	3786.78		5.91644	4018.66		13.9162	3986.18		6.91597	3889.11		14.9158	1155.29		7.9153	3829.92		15.9158	2811.66		0.915749	3515.75
0.917008	4933.83		8.91797	4557.76		1.91702	4481.97		9.91719	4228.13		2.91649	4257.09		10.9167	4129.58		3.91826	3350.71		11.917	3912.14		4.91773	4313.4		12.9176	4002.84		5.91762	4164.92		13.9171	4144.73		6.91736	4172.78		14.9176	1202.73		7.9171	4040.36		15.9172	2841.56		0.917346	3645.26
0.918675	5155.44		8.91915	4702.27		1.91861	4674.45		9.91851	4397.72		2.91746	4496.66		10.918	4198.56		3.9193	3549.21		11.9182	4096.77		4.91877	4352.77		12.9187	4319.22		5.91936	4327.46		13.9185	4264.8		6.91826	4412.02		14.9193	1277.25		7.91849	4314.42		15.9191	2996.39		0.918458	3842.04
0.919855	5388.12		8.92081	4842.75		1.92028	4877.42		9.91941	4595.39		2.9185	4620.93		10.9198	4411.91		3.92034	3715.46		11.9191	4287.69		4.92043	4481.57		12.9197	4542.94		5.92096	4514.62		13.9203	4456.35		6.91958	4482.56		14.9202	1321.48		7.91939	4574.29		15.9203	3219.53		0.919499	4076.24
0.920827	5682.79		8.92227	5095.7		1.92153	5177.53		9.9208	4733.14		2.92024	4713.29		10.9212	4662.89		3.92194	3838.15		11.9206	4407.64		4.92196	4763.78		12.9213	4582.83		5.92186	4847.53		13.9216	4706.51		6.92146	4666.78		14.9211	1366.26		7.92071	4563.89		15.9211	3343.17		0.921027	4221.67
0.922216	5832.96		8.92331	5293.09		1.92243	5376.81		9.92268	4853.47		2.92191	4974.95		10.9221	4857.02		3.9236	4056.22		11.9224	4630.01		4.923	4975.05		12.923	4841.31		5.92283	4901.34		13.9225	4900.42		6.92278	4941.78		14.9227	1352.92		7.92252	4914.17		15.9224	3399.86		0.922763	4390.67
0.924022	6122.96		8.92443	5475.48		1.92389	5450.58		9.924	5227.25		2.92281	5255.38		10.9234	4945.08		3.92478	4143.33		11.9235	4862.48		4.92404	5219.96		12.9241	5117.56		5.92443	4980.88		13.9239	5100.25		6.92361	5180.39		14.9243	1429.71		7.92391	5106.45		15.9241	3514.86		0.924013	4615.2
0.925411	6401.15		8.92616	5679.97		1.9257	5645.75		9.92476	5551.36		2.92371	5474.8		10.9252	5134.66		3.92576	4386.05		11.9244	4950.98		4.92564	5393.21		12.925	5197.79		5.92603	5221.21		13.9258	5299.82		6.92479	5299.51		14.9254	1485.98		7.92467	5337.49		15.9255	3738.55		0.924916	4729.99
0.926383	6774.92		8.92783	5954.17		1.92702	5966.46		9.92601	5548.68		2.92531	5676.14		10.9266	5443.99		3.92721	4517.13		11.9258	5133.32		4.92738	5690.41		12.9266	5362.84		5.92707	5494.71		13.9271	5558.14		6.92646	5453.04		14.9264	1496.54		7.92585	5451.03		15.9264	3901.86		0.926374	4865.84
0.927563	6970.1		8.92887	6212.76		1.92792	6229.65		9.92775	5766.58		2.92691	5893.64		10.9275	5709.28		3.92902	4694.78		11.9275	5424.02		4.92849	5748.72		12.9284	5630.7		5.92811	5706.12		13.9278	5812.07		6.92785	5757.3		14.9279	1578.79		7.92759	5764.5		15.9276	3909.99		0.92811	5123.51
0.929369	7088.07		8.92991	6424.88		1.92931	6421.44		9.92914	6105.41		2.92802	6173.25		10.9286	5891.55		3.9302	4865.64		11.9287	5650.28		4.92946	5895.68		12.9296	5888.66		5.92964	5836.42		13.929	5841.47		6.92889	5863.12		14.9297	1615.15		7.92905	5926.83		15.9294	4107.44		0.92943	5442.41
0.930897	7463.61		8.93151	6593.96		1.93118	6566.64		9.93011	6301.18		2.92899	6278.82		10.9303	5968.38		3.9311	4966.87		11.9297	5791.86		4.93099	6130.22		12.9303	6145.5		5.93137	6045.53		13.9308	6083.15		6.93	6027.6		14.9309	1669.41		7.93002	6123.43		15.931	4373.28		0.930402	5533.83
0.931799	7768.7		8.93325	6888.35		1.93243	6912.55		9.93129	6433.61		2.93052	6489.5		10.9318	6248.6		3.93263	5164.83		11.931	5961.68		4.93272	6377.39		12.9318	6196.37		5.93262	6345.4		13.9321	6382.11		6.93174	6293.06		14.9318	1772.1		7.93113	6371.36		15.9319	4537.72		0.931791	5732.33
0.93298	8004.08		8.93436	7205.2		1.9332	7210.67		9.93296	6498.12		2.93225	6713.9		10.9327	6568.07		3.93444	5328.86		11.9328	6157.5		4.93398	6631.34		12.9334	6453.67		5.93353	6591.76		13.9331	6630.88		6.93333	6611.94		14.9332	1779.99		7.93287	6465.93		15.933	4618.06		0.933596	5927.88
0.934786	8187.16		8.93533	7302.07		1.93445	7294.66		9.93455	6773.61		2.93357	7050.42		10.9339	6708.62		3.93569	5585.97		11.9342	6438.05		4.93488	6807.63		12.9347	6748.17		5.93499	6733.67		13.9343	6815.64		6.93438	6906.22		14.935	1852.77		7.93453	6716.26		15.9347	4736.21		0.934916	6159.86
0.936383	8556.92		8.93692	7430.35		1.93618	7518.98		9.93559	7124.5		2.93448	7296.43		10.9356	6863.13		3.93645	5671.79		11.9352	6697.47		4.93634	6890.38		12.9357	6916.89		5.93679	6982.47		13.936	7032.65		6.93542	6927.26		14.9363	1881.41		7.93558	6991.76		15.9364	4847.11		0.935749	6238.58
0.937216	8823.02		8.93866	7709.67		1.9375	7806.67		9.93671	7304.54		2.9358	7338.12		10.9372	7038.87		3.93777	5853.91		11.9364	6793.21		4.93814	7264.07		12.937	7120.44		5.93811	7311.98		13.9376	7161.76		6.93708	7142.36		14.9372	1938.05		7.93655	7137.37		15.9375	5086.68		0.93693	6451.4
0.938258	9068.8		8.93977	8057.43		1.93847	8063.8		9.9383	7542.5		2.9376	7694.97		10.9383	7355.92		3.93944	6058.81		11.9381	6873.67		4.93939	7595.13		12.9387	7368.35		5.93901	7465.09		13.9386	7516.27		6.93882	7437.89		14.9386	1916.92		7.93821	7308.25		15.9385	5232.7		0.938666	6649.8
0.939855	9296.48		8.94054	8265.35		1.93972	8232.16		9.94004	7830.2		2.93899	7985.95		10.9393	7513.58		3.94076	6369.92		11.9397	7154.74		4.94016	7731.83		12.9402	7563.52		5.9404	7578.65		13.9397	7656.95		6.93993	7745.67		14.9404	2017.7		7.93995	7601.45		15.9401	5357.25		0.940055	6951.9
0.941383	9648.96		8.942	8394.77		1.94146	8491.38		9.94108	8079.42		2.93996	8241.12		10.9409	7658.91		3.94173	6455.78		11.9407	7440.15		4.94154	7861.25		12.9411	7760.27		5.94228	7894.66		13.9413	7850.53		6.94083	7976.05		14.9418	2118.25		7.94106	7881.48		15.9419	5578.13		0.941027	7063.33
0.942424	9857.66		8.94373	8619.25		1.94299	8809.66		9.94205	8194.41		2.94121	8467.07		10.9427	8006.39		3.94298	6556.02		11.9418	7713.32		4.94321	8130.32		12.9423	7901.53		5.94353	8168.53		13.943	8172.23		6.94243	8086.13		14.9426	2166.32		7.94203	8170.75		15.9429	5773.19		0.942208	7278.81
0.943466	9981.91		8.94491	8912.1		1.94403	9113.93		9.94372	8418.36		2.94302	8606.36		10.9438	8340.11		3.94471	6688.6		11.9435	7791.93		4.94453	8352.49		12.9441	8195.95		5.94429	8345.58		13.9441	8370.7		6.94424	8304.3		14.9438	2210.22		7.94363	8290.69		15.9437	5923.56		0.943874	7485.69
0.945063	10163.3		8.94588	9135.3		1.94507	9306.52		9.94553	8672.6		2.94448	8984.11		10.9447	8537.09		3.94631	6871.57		11.9451	8071.73		4.9455	8555.05		12.9457	8634.4		5.94554	8483.09		13.9451	8574.88		6.94528	8648		14.9455	2289.72		7.94537	8550.59		15.9452	5947.98		0.945541	7717.2
0.946799	10551.4		8.94727	9272.58		1.94681	9503.93		9.94657	8936.36		2.94531	9225.17		10.9463	8623.67		3.94728	7217.62		11.946	8402.87		4.94675	8744.53		12.9466	8857.83		5.94728	8693.85		13.9467	8758.96		6.94611	8871.84		14.947	2337.26		7.94641	8895.66		15.9469	6088.16		0.946583	7998.24
0.94798	11018.9		8.94901	9582.21		1.94847	9716.71		9.9474	9163.85		2.94642	9484.65		10.9481	8933.23		3.94839	7360.99		11.947	8537		4.94849	9068.91		12.9477	8839.12		5.94867	8970.02		13.9485	9057.78		6.94757	9056.34		14.9479	2471.58		7.94724	9114.69		15.948	6337.87		0.947555	8237.01
0.948952	11308.9		8.95047	9997.09		1.94952	10046.3		9.94886	9223.98		2.94809	9712.46		10.9492	9161.1		3.95006	7415.69		11.9486	8712.51		4.95002	9395.87		12.9495	9021.43		5.94964	9290.13		13.9495	9483.34		6.94924	9237.92		14.9491	2452.38		7.9487	9300.3		15.949	6412.32		0.949221	8348.01
0.950411	11578.8		8.95144	10373.1		1.95049	10268.1		9.95053	9576.9		2.94962	9876.84		10.95	9353.72		3.95173	7736.13		11.9502	8989.13		4.95099	9523.77		12.9511	9460.91		5.95082	9410.75		13.9503	9628.56		6.95049	9519.15		14.9508	2504.23		7.95037	9531.7		15.9504	6557.78		0.950957	8471.18
0.952216	11865.5		8.95262	10556		1.95215	10359.8		9.95177	9873.67		2.95059	10129		10.9514	9562.96		3.9527	7955.9		11.9512	9307.06		4.9521	9675.25		12.952	9647.69		5.95249	9554.04		13.9518	9638.01		6.95146	9763.43		14.9524	2567.31		7.95162	9786.1		15.9522	6753.05		0.952069	8694.45
0.953466	12231.6		8.95436	10664.3		1.95389	10751.7		9.95275	10118.4		2.9517	10287.3		10.9531	9705.14		3.95374	8040.23		11.9523	9423.54		4.95384	9833.38		12.953	9841.52		5.95408	9777.22		13.9535	9934.84		6.95278	9849.11		14.9534	2648.2		7.95259	9905.6		15.9536	6868.35		0.952971	8887.02
0.954369	12433.3		8.95588	10974.8		1.95486	11106.9		9.95414	10191.9		2.95337	10449.3		10.9544	10056.5		3.95548	8165.83		11.9538	9571.57		4.95543	10160.9		12.9546	9956.38		5.95512	10041.2		13.9547	10272.7		6.95458	9979.5		14.9545	2698.73		7.95391	10074.1		15.9545	6976.43		0.954638	9091.37
0.955827	12648.6		8.95686	11169.2		1.95577	11197.3		9.95587	10392.5		2.95503	10791.8		10.9554	10325.8		3.95714	8380.53		11.9555	9832.85		4.95647	10460.7		12.9561	10204.9		5.95617	10134		13.9557	10517.2		6.95597	10372.7		14.9561	2755.53		7.95571	10267.1		15.9558	7144.03		0.956374	9472.54
0.957633	12826.6		8.95804	11419.3		1.95729	11349.6		9.95726	10561.5		2.95614	11116.5		10.9567	10577.4		3.95812	8717.23		11.9568	10005		4.95759	10622.8		12.9573	10487.6		5.95783	10342.2		13.9571	10631.3		6.95694	10773		14.9578	2779.22		7.95717	10632.6		15.9576	7316.91		0.957416	9756.9
0.958883	13263.8		8.95977	11615.9		1.95896	11760.3		9.95823	10914.2		2.95712	11348.3		10.9585	10606.4		3.95902	8717.91		11.9577	10205.9		4.95925	10776		12.9582	10737.3		5.95957	10704.8		13.9588	10810.3		6.9582	10859.2		14.9589	2879.58		7.95815	10883.7		15.959	7486.05		0.958319	9812.06
0.959716	13545.5		8.96137	11821.2		1.96014	12099.7		9.95948	11043.8		2.95871	11606.5		10.9599	10908.1		3.96055	8858.13		11.9592	10372.8		4.96092	11153.5		12.9598	10869.6		5.96068	10838.2		13.9603	10998.2		6.95993	11056.2		14.9599	2914.86		7.95933	11067.2		15.96	7725		0.959777	9922.32
0.960966	13691		8.96227	12134		1.96111	12140.6		9.96122	11261.7		2.96045	11879.6		10.9609	11226.4		3.96214	9190.64		11.9609	10666.7		4.96189	11373.9		12.9616	11142		5.96165	11003.8		13.9612	11236.6		6.96146	11372.3		14.9615	2930.22		7.96106	11263.9		15.9612	7737.29		0.961444	10152.6
0.962702	13871.5		8.96324	12312.1		1.9625	12369		9.96275	11694.6		2.96163	11988.1		10.962	11332.7		3.96332	9413.67		11.9623	10941.5		4.96279	11347.9		12.9628	11410.6		5.96325	11225.5		13.9624	11390.9		6.96243	11512.5		14.9633	2990.64		7.96259	11495.7		15.963	7894.55		0.962624	10324.1
0.964091	14181.3		8.96484	12337		1.96424	12697.6		9.96372	11882		2.96253	12192		10.9638	11462.4		3.96437	9431.5		11.9632	10969.1		4.96432	11500		12.9637	11629.3		5.96505	11482.1		13.9642	11688.9		6.96354	11748.6		14.9643	3051.21		7.96356	11649.1		15.9645	8023.88		0.963596	10516.1
0.965063	14351.9		8.96644	12616.9		1.96563	12954.1		9.9649	11998.2		2.96406	12389.3		10.9654	11707.7		3.96582	9574.08		11.9646	11344.7		4.96599	11801.1		12.9651	11681.5		5.9661	11832.2		13.9657	11837.2		6.96535	11871.5		14.9652	3059.25		7.96474	11826.3		15.9653	8183.5		0.964985	10595.8
0.966244	14512.7		8.96755	12834		1.96653	13230.9		9.96671	12114.9		2.96587	12653.9		10.9663	12032.4		3.96756	9748.01		11.9664	11455.6		4.9671	12123.2		12.9669	11862.7		5.96693	11905.8		13.9667	12084.6		6.96695	12145.8		14.9666	3067.94		7.96648	11876.3		15.9664	8464.48		0.966791	10908.2
0.96798	14760.3		8.96859	13249.1		1.96785	13180.4		9.9683	12466.2		2.96698	12939		10.9675	12132.4		3.96888	9809.11		11.9678	11523		4.96807	12242.4		12.9682	12110.5		5.96839	11910.3		13.9678	12348.6		6.96785	12240.4		14.9683	3083.59		7.96808	12240.2		15.968	8507.78		0.96818	11112.2
0.969577	15020.1		8.97012	13274.2		1.96959	13424.3		9.96914	12748		2.96781	13225.2		10.9693	12294.9		3.96978	10009.5		11.9685	11767.9		4.9696	12420.4		12.9691	12257.3		5.97013	12153.3		13.9696	12497.9		6.96882	12472.2		14.9695	3213.1		7.96898	12615.9		15.9696	8664.91		0.969152	11301.4
0.97055	15070.3		8.97193	13484.1		1.97111	13599.5		9.97018	12700.1		2.9692	13263.5		10.9709	12408		3.9711	10164		11.9697	11948.7		4.97134	12516.8		12.9705	12452.7		5.9713	12415.2		13.9712	12596.4		6.97042	12573.9		14.9705	3255.24		7.96995	12684.2		15.9706	8795.88		0.970333	11343.6
0.971591	15412		8.97311	13701.9		1.97202	13751.4		9.97184	12796.1		2.97094	13420.3		10.9717	12727		3.97291	10185.6		11.9714	12070.6		4.97266	12731.6		12.9724	12651.2		5.97221	12568.3		13.972	12826		6.97201	12767		14.9718	3257.34		7.97155	12826.7		15.9717	8867.89		0.972138	11347.8
0.973327	15614		8.97401	13837.1		1.97327	13765.9		9.97337	13066.6		2.97219	13629		10.9727	12810.4		3.97437	10385.4		11.9728	12360.8		4.97356	12877.4		12.9737	12825.9		5.9736	12671.5		13.973	12964.9		6.97306	13132.4		14.9736	3333.97		7.97315	12895.5		15.9733	8886.93		0.973666	11555.4
0.974994	15698.9		8.97547	13879.7		1.97507	14075.9		9.97441	13177		2.97309	13694.2		10.9743	12852.6		3.97527	10435.8		11.9738	12491.9		4.97488	12871		12.9745	12845.2		5.9754	12871.2		13.9747	13063.9		6.9741	13207		14.975	3449.75		7.97426	13175.1		15.975	9003.19		0.974569	11649.2
0.976036	16065.2		8.97727	14034.4		1.97653	14266.1		9.97546	13161.9		2.97441	13961.5		10.9759	13075.4		3.97652	10651.1		11.975	12743.6		4.97668	13118.7		12.9757	12882.7		5.97679	12982.8		13.9762	13433.1		6.9757	13293.2		14.976	3385.34		7.9753	13246.6		15.9762	9188.04		0.975749	11732.7
0.977077	16298.5		8.97859	14269.6		1.97736	14585.7		9.97705	13431		2.97614	14156.1		10.977	13207.5		3.97832	10687.7		11.9767	12761		4.97807	13160.2		12.9774	13140.6		5.97769	13214.1		13.9773	13458.7		6.97743	13400.9		14.9772	3425.48		7.97683	13399.3		15.9771	9321.28		0.977555	11899.5
0.978744	16391.8		8.9795	14414.8		1.9784	14628.4		9.97879	13550.9		2.97767	14195.2		10.978	13357.8		3.97978	10717.6		11.9783	12920.5		4.97897	13249.3		12.9789	13328.8		5.97894	13182.1		13.9783	13439		6.97861	13522.6		14.9789	3455.98		7.97856	13541.4		15.9786	9422.15		0.979083	12161.5
0.980411	16542.9		8.98088	14387.6		1.98014	14652.7		9.97997	13667.4		2.97864	14435		10.9795	13525		3.98062	10920.4		11.9794	13112		4.98029	13454.9		12.9798	13463.6		5.98075	13240.6		13.9799	13648.3		6.97951	13538		14.9804	3470.1		7.97981	13713.4		15.9804	9344.64		0.979916	12178.9
0.981452	16692.1		8.98276	14439.9		1.9816	14701		9.98094	13706.6		2.97982	14451.1		10.9813	13652		3.98173	10960		11.9803	12937.8		4.9821	13491.5		12.9809	13522.6		5.98228	13548.9		13.9817	13684.4		6.98097	13618.9		14.9814	3477.17		7.98071	13771.2		15.9817	9374.6		0.980958	12213.7
0.982286	16693.6		8.98401	14594.7		1.98264	14866.9		9.9824	13785.4		2.98149	14417.7		10.9825	13763.4		3.98339	11125.6		11.982	13002.7		4.98349	13619.6		12.9826	13483.8		5.98318	13538.1		13.9828	13906.5		6.98278	13741.2		14.9825	3524.56		7.98217	13853.9		15.9826	9490.59		0.982624	12306.7
0.983813	16741.7		8.98484	14904.2		1.98375	15100.3		9.98421	13910.5		2.98309	14683.3		10.9834	13815.8		3.98492	11104.5		11.9837	13403.8		4.98432	13693.3		12.9843	13703.2		5.98436	13652.3		13.9838	13906.2		6.9841	13866.7		14.9843	3529.65		7.98398	14017.5		15.984	9538.5		0.984152	12424.9
0.98548	16885.6		8.98609	14707.9		1.98535	15253.6		9.98546	14187		2.98406	14785.4		10.9849	13887.6		3.98596	11196		11.9849	13398.7		4.98543	13875.8		12.9853	13912.8		5.98617	13731.5		13.9853	13950.3		6.985	13993		14.9859	3519.08		7.9853	14046.3		15.9858	9629.34		0.985194	12422
0.986661	16992.5		8.98776	14702		1.98702	15244.1		9.98636	14321.4		2.98517	14931.6		10.9866	13987.5		3.98701	11211.1		11.9858	13391.5		4.98717	13875.1		12.9864	13993.1		5.98769	13714.4		13.987	14007.6		6.98639	14292.3		14.9868	3587.7		7.98613	14201.2		15.9871	9766.92		0.986235	12532.8
0.987633	16980.4		8.98922	14890.4		1.9882	15158.1		9.98782	14363		2.98691	15000.9		10.9879	14075.7		3.9886	11315.1		11.9874	13546.4		4.98863	13954.8		12.988	13981.9		5.98853	13833.1		13.9883	14001.2		6.98826	14320.5		14.9878	3644.78		7.98752	14269.2		15.9878	9772.49		0.987833	12599.1
0.989091	17042.9		8.99019	14895.4		1.98917	15313.2		9.98962	14366.1		2.98857	14984.7		10.9888	14088.4		3.99034	11349.1		11.9892	13691.8		4.98967	14054		12.9897	14128.9		5.98957	13864.5		13.9892	13991.9		6.98951	14271.9		14.9895	3660.8		7.9894	14205		15.9892	9818.26		0.989569	12693.5
0.990827	17243.5		8.99137	14998.5		1.99063	15447.4		9.99087	14203.2		2.98941	15036.2		10.9902	14194.9		3.99145	11309.5		11.9903	13696.8		4.99078	14095.7		12.9908	14065		5.99124	13818.1		13.9906	14206.5		6.99028	14370.7		14.991	3630.24		7.99071	14143.2		15.9909	9903.04		0.990749	12788.9
0.992147	17052.1		8.99311	15086.4		1.99243	15452.4		9.9917	14487.8		2.99038	15386.2		10.9921	14142.9		3.99242	11590.4		11.991	13513.5		4.99238	14145.1		12.9918	14044.4		5.99283	13860.6		13.9924	14400.8		6.99153	14506.6		14.9921	3557.99		7.99148	14221.8		15.9922	9784.69		0.991722	12895.5
0.993119	17375.6		8.9947	15118.4		1.99368	15457.2		9.99296	14437.7		2.99198	15228.9		10.9934	14216.6		3.99395	11665.5		11.9925	13731.3		4.99404	14017		12.9934	14091.7		5.9938	14018.8		13.9937	14354.7		6.99327	14401.1		14.9931	3612.77		7.99273	14388.3		15.9932	9800.65		0.99318	12988
0.994438	17545.4		8.99575	15118.8		1.99459	15568.1		9.99469	14406.9		2.99357	15193.5		10.9942	14322.2		3.99569	11666.8		11.9942	13832		4.99516	14298.8		12.9952	14236		5.99485	14123.8		13.9945	14376.4		6.99465	14385.6		14.9947	3570.66		7.9944	14396		15.9944	9869.13		0.994985	13023.2
0.996175	17453.4		8.99679	15004.6		1.99611	15522.4		9.99601	14548.3		2.99468	15228		10.9954	14273.1		3.99687	11599.1		11.9954	13859		4.9962	14261.6		12.9962	14218.8		5.99644	14087.6		13.9958	14426.7		6.99563	14452.1		14.9964	3610.07		7.99585	14523.5		15.9962	9917.12		0.996235	12912.8
0.997633	17468		8.99845	15149.1		1.99792	15500.7		9.99698	14532.5		2.99566	15197.5		10.9972	14464		3.99784	11497.3		11.9964	13909.9		4.99773	14224.7		12.997	14214.5		5.99818	14203.9		13.9975	14640.8		6.99681	14613		14.9976	3604.7		7.99683	14522.4		15.9977	9986.85		0.997138	12826.1
0.998605	17592.7		9.00012	15150.6		1.9991	15361.4		9.99823	14533.3		2.99718	15447.1		10.9986	14551.5		3.99937	11585.9		11.9978	13811.3		4.99946	14228.7		12.9984	14347.1		5.99936	14123.8		13.9989	14531.5		6.99854	14556.3		14.9985	3602.8		7.99794	14610.4		15.9987	9885.71		0.998596	12929.9
0.999855	17516.6		9.00123	15073.6		1.99993	15512.8		9.9999	14407.2		2.99892	15613.2		10.9995	14353.9		4.00117	11530		11.9995	13795.9		5.00064	14188.5		13.0002	14218.4		6.00033	14174.6		13.9999	14338		7.00014	14585.6		14.9999	3683.1		7.99967	14534		15.9998	9902.04		1.0004	13062.2
1.00166	17442.4		9.0022	15077.6		2.00125	15637.5		10.0015	14425.4		3.00017	15468.5		11.0007	14294.1		4.00235	11566.4		12.001	13888.4		5.00154	14164.8		13.0014	14219.6		6.00179	14211.4		14.001	14318.1		7.00111	14626.5		15.0018	3640.98		8.00134	14440.1		16.0015	9966.99		1.00165	13106.2
1.00312	17411.8		9.0038	15163.6		2.00292	15567		10.0025	14499.5		3.00114	15442.5		11.0025	14302.7		4.00312	11571.7		12.0019	13770.7		5.00314	14270.2		13.0023	14258.6		6.00353	14142.9		14.0028	14410		7.00222	14556.8		15.0031	3610.22		8.00238	14438.3		16.0031	10003.8		1.00249	12860.9
1.00388	17501.8		9.00554	15112.7		2.00424	15508.7		10.0036	14473		3.0026	15402		11.0041	14200.6		4.00451	11442		12.0031	13802.3		5.00495	14332		13.0037	14075		6.00485	14143.9		14.0044	14168.3		7.00389	14475.3		15.0039	3660.28		8.00342	14508.2		16.0042	9909.69		1.00374	12872.4
1.00499	17412.6		9.00658	15065.5		2.00521	15448.8		10.0053	14484.1		3.00441	15245.6		11.005	14134		4.00617	11592.4		12.0049	13842.3		5.00606	14255.6		13.0055	14165.6		6.00575	14072.4		14.0053	14332.3		7.00556	14447.6		15.0054	3633.33		8.00509	14396.7		16.0052	9723.55		1.00547	12952.5
1.00673	17280.7		9.00741	15026.8		2.00646	15581.9		10.007	14510.2		3.00573	15286.2		11.0061	14270.4		4.00749	11417.7		12.0064	13818.9		5.00689	14106.5		13.0068	14123.9		6.00714	14014.6		14.0064	14390.5		7.00667	14458.9		15.0072	3598.02		8.00676	14473.9		16.0069	9721.18		1.00686	12954.6
1.00826	17314.7		9.00887	15066.6		2.0082	15490.6		10.008	14596.1		3.00663	15208.3		11.0077	14279.3		4.00846	11536.3		12.0074	13720.4		5.00828	14213.1		13.0078	14063.9		6.00901	14087.1		14.0081	14207.9		7.00764	14349.5		15.0085	3616.89		8.00787	14437		16.0086	9777.63		1.00783	12909.3
1.00923	17253.1		9.01061	15049.1		2.00979	15395.3		10.009	14548.5		3.00795	15256.1		11.0095	14197		4.00971	11424.2		12.0085	13689.9		5.00995	14117.3		13.0091	14139.6		6.01026	13869.5		14.0098	14231.9		7.00924	14258.8		15.0093	3584.23		8.00884	14308.6		16.0096	9932.41		1.00901	12796.1
1.01034	17202.6		9.01179	14986.1		2.01077	15400.4		10.0107	14371.5		3.00982	15300.1		11.0106	14018.7		4.01145	11230.1		12.0103	13649.8		5.01127	13896.4		13.0108	14050.9		6.01103	13790.5		14.0108	14190.5		7.01097	14288.1		15.0105	3610.07		8.01044	14200.8		16.0105	9915.63		1.01075	12759
1.01194	17022.3		9.01276	14799.3		2.01181	15256.2		10.0124	14245.9		3.01114	15219.3		11.0116	14129.1		4.01298	11290.9		12.0119	13655.5		5.01217	14026.5		13.0123	14039.7		6.01235	13849.5		14.0118	14279		7.01201	14184.5		15.0122	3614.54		8.01224	14075.4		16.012	9787.72		1.01235	12694.4
1.01367	17033.9		9.01415	14704.1		2.01354	15188.8		10.0134	14261.8		3.01191	15169.2		11.0131	14196.3		4.01395	11243.4		12.0127	13595.1		5.01349	13935.9		13.0133	14086.8		6.01408	13757.2		14.0135	14005		7.01292	14094.5		15.0136	3553.31		8.01328	14106.3		16.0136	9672.76		1.01332	12680.8
1.01479	16952.2		9.01595	14520.4		2.01521	15087		10.0142	14182.4		3.01316	15238.9		11.015	14109.7		4.01506	11240.8		12.0137	13444.7		5.01522	13732.5		13.0145	13931		6.0154	13581.1		14.0152	13928		7.01438	14089.7		15.0146	3524.7		8.01412	14029.1		16.0148	9776.63		1.01436	12725.7
1.01569	16910.5		9.01734	14541.5		2.01618	14995.8		10.0157	14118.9		3.01482	15000.8		11.016	13849		4.0168	11146.7		12.0153	13400.8		5.01668	13744.5		13.0162	13759.3		6.01637	13543.4		14.0162	13749.2		7.01604	13876.3		15.0158	3525		8.01558	14062.7		16.0157	9747.06		1.01603	12627.2
1.01722	16813.4		9.01824	14625.3		2.01722	14997.2		10.0174	14039.5		3.01628	14920.8		11.0168	13788.9		4.01846	11052.5		12.0169	13418.8		5.01766	13632.5		13.0178	13610.3		6.01762	13617.9		14.0171	13817.5		7.01722	13676.7		15.0175	3580.74		8.01724	14038.2		16.0172	9664.56		1.01769	12532.8
1.01902	16585		9.0195	14462		2.01896	14988.1		10.0186	13937.6		3.01725	14736.5		11.0183	13783		4.01944	10952.4		12.018	13151		5.01884	13405.5		13.0186	13541.6		6.01929	13472.2		14.0185	13877.3		7.0182	13760.5		15.0191	3525.87		8.01842	13854.6		16.0189	9604.1		1.0188	12474.6
1.0202	16390.8		9.0213	14362.2		2.0207	14727.2		10.0196	13778		3.01837	14657.2		11.02	13583.7		4.02048	10954		12.019	13030.8		5.02057	13396.1		13.0196	13410.9		6.02089	13400.6		14.0203	13689.1		7.01958	13665.7		15.0201	3406.9		8.01939	13598.8		16.0203	9339.51		1.01978	12298.5
1.02111	16398		9.02283	14186.8		2.0216	14605.5		10.021	13589.3		3.02003	14529.2		11.0211	13385.3		4.02221	10860.3		12.0205	12979.2		5.02217	13360.3		13.0213	13521.6		6.02186	13088.3		14.0214	13565.3		7.02132	13542.3		15.0212	3415.17		8.02078	13547.4		16.0212	9344.99		1.02144	12165.6
1.02263	16477.5		9.02373	13953.3		2.0225	14541.9		10.0227	13531.6		3.0217	14522.7		11.0221	13336		4.02388	10637.3		12.0223	12976		5.02314	13271.4		13.0228	13324.6		6.02297	13066.9		14.0224	13365.4		7.02271	13464.6		15.0229	3392.2		8.02259	13554.4		16.0225	9359.66		1.02318	11949.2
1.02444	16147.4		9.02491	13862.6		2.02403	14512.9		10.0241	13397.8		3.02274	14331.8		11.0235	13250		4.02485	10454.3		12.0235	12914.7		5.02418	13153.8		13.0239	13135.9		6.02464	13117.3		14.0238	13176.9		7.02368	13370.7		15.0245	3393.6		8.02398	13327.1		16.0243	9205.06		1.02422	11934.5
1.02569	15821.4		9.02672	13796.3		2.0257	14309.1		10.025	13301.3		3.02371	14172.4		11.0253	13104.3		4.02575	10335.9		12.0244	12924.5		5.02592	13123.5		13.0249	13065		6.02631	12871.6		14.0255	13101.5		7.02493	13184.2		15.0256	3352.55		8.02495	13013.5		16.0258	9136.59		1.02505	11907.3
1.02645	15549.9		9.02824	13675.4		2.02681	14112.6		10.0264	13284.3		3.02538	13959.5		11.0267	12941.4		4.02728	10363.2		12.0259	12784.1		5.02759	12886.5		13.0265	12864.2		6.02735	12682.8		14.0269	12953.6		7.02667	13000.5		15.0265	3276.37		8.0262	12952		16.0267	9051.06		1.02658	11744.7
1.02777	15521.3		9.02908	13397.2		2.02778	13874.7		10.0282	13154		3.02712	13753.6		11.0276	12800.9		4.02895	10303.5		12.0276	12649.1		5.02849	12716.8		13.0282	12754.1		6.02832	12533.2		14.0278	12826.5		7.02819	12924.2		15.0282	3254.55		8.02801	12940.4		16.0279	8953.33		1.02825	11620.6
1.02951	15327.7		9.03012	13028.5		2.02931	13657.5		10.0296	12751.8		3.02823	13742.7		11.0288	12669.7		4.03006	10077		12.029	12504		5.02946	12496		13.0294	12489.3		6.02999	12403.8		14.0292	12651.5		7.0291	12747.7		15.0299	3212.14		8.02953	12844.3		16.0297	8846.7		1.02943	11447.7
1.03083	15089.3		9.03179	13053.1		2.03104	13593.5		10.0305	12614		3.02913	13570.2		11.0306	12483.7		4.03103	9964.35		12.0299	12178.9		5.03106	12403.7		13.0303	12314.3		6.03172	12161.2		14.0309	12644		7.03035	12616.8		15.0309	3140.47		8.03044	12574.6		16.0312	8582.65		1.0304	11238.2
1.0318	14862.7		9.03338	12968		2.03229	13274.4		10.0318	12387.3		3.03073	13418.5		11.0321	12182.6		4.03256	9887.6		12.0312	11939.5		5.03266	12151.6		13.0318	12176.4		6.03276	11960.2		14.0324	12463.4		7.03215	12445.4		15.0318	3110.11		8.03162	12517.2		16.032	8464.22		1.03186	11142.2
1.03305	14782.9		9.03443	12733.6		2.03327	12934.2		10.0337	12177.4		3.03253	13242.5		11.033	12062.3		4.0343	9710.4		12.0331	11768		5.03377	12056.5		13.0336	12056.6		6.0336	11712.1		14.0333	12140.8		7.03368	12282		15.0333	3137.81		8.03342	12376.9		16.0331	8387.88		1.0336	10961.7
1.03479	14508.4		9.03547	12459.6		2.03459	12865.8		10.0351	12119.6		3.03364	12824.6		11.0343	11953.9		4.03555	9412.04		12.0344	11465.1		5.03474	11852.2		13.0349	11829.5		6.03512	11626.8		14.0345	11846.9		7.03451	11977.7		15.0349	3058.62		8.03495	11982.5		16.0348	8244.18		1.03499	10768.6
1.03631	14159.1		9.03706	12311.3		2.03632	12809.3		10.0359	11862.8		3.03441	12646.3		11.0361	11817.9		4.03645	9287.27		12.0352	11351.9		5.03627	11602.1		13.0358	11621.2		6.03679	11354.5		14.0363	11692.6		7.03556	11903		15.0361	2975.62		8.03578	11827.6		16.0363	8101.99		1.03589	10597
1.03729	13922.8		9.03873	12041.2		2.03778	12500.5		10.0371	11631.8		3.03587	12584.4		11.0376	11493.2		4.03784	9134.97		12.0365	11230.9		5.038	11327.6		13.0373	11398.3		6.03797	11216.3		14.0378	11494.1		7.03722	11732.6		15.0371	2884.95		8.03676	11677.5		16.0373	7983.1		1.03714	10467.3
1.03847	13757.6		9.03991	11719.5		2.03875	12139.6		10.0387	11443.4		3.0376	12342.9		11.0384	11128.7		4.03964	9004.59		12.0382	10989.7		5.03925	11308.9		13.0391	11067.6		6.03887	10991.6		14.0386	11291.6		7.03875	11483.6		15.0386	2890.42		8.03842	11566.6		16.0384	7867.18		1.03894	10295.5
1.04013	13552.7		9.04088	11373.2		2.04	11987.3		10.0402	11159.7		3.03878	12094.6		11.0395	11120.8		4.04103	8747.05		12.0396	10673.1		5.04016	11019.9		13.0403	10770		6.04033	10840.4		14.0397	11079.8		7.03979	11130.4		15.0403	2869.53		8.04002	11276.5		16.04	7776.9		1.0404	10023.2
1.0418	13342.5		9.04234	11241.5		2.04181	11716		10.0413	10841.5		3.03975	11921.6		11.0411	10944.8		4.04194	8509.67		12.0405	10453.1		5.04161	10813.7		13.0411	10695.1		6.04207	10630.5		14.0414	10907.7		7.04083	11045.5		15.0416	2804.01		8.04106	10934.6		16.0417	7538.29		1.0413	9712.17
1.04277	13006.8		9.04415	11079.1		2.04327	11402.1		10.0424	10686.2		3.04114	11764.4		11.0427	10550.9		4.04326	8478.13		12.0417	10399.9		5.04335	10456.7		13.0423	10708.5		6.04346	10418.8		14.0429	10726.6		7.04243	10771.3		15.0426	2759.64		8.0421	10795.3		16.0428	7264.9		1.04255	9561.42
1.04381	12697.8		9.0454	10718.3		2.04403	11098.8		10.044	10699.8		3.04288	11419.4		11.0437	10317.5		4.04506	8314.73		12.0435	10076.8		5.04467	10225.2		13.0441	10395.1		6.04436	10137.8		14.0439	10526.7		7.04417	10521.9		15.0438	2768.66		8.0437	10635.9		16.0438	7115.14		1.04436	9414.69
1.04555	12381.6		9.0463	10560.4		2.04514	11071.5		10.0457	10509.9		3.04427	11011.9		11.0447	10105.6		4.04645	8049.35		12.045	9866.39		5.04557	9980.6		13.0455	10014.6		6.04561	9928.55		14.045	10235		7.04535	10141.1		15.0456	2714.33		8.04537	10293.3		16.0453	7056.04		1.04589	9129.34
1.04729	12095.5		9.04776	10383.5		2.04688	10889.3		10.0468	10138.6		3.04524	10765.1		11.0463	9933.31		4.04721	7824.61		12.046	9588.99		5.04696	9910.48		13.0464	9794.91		6.04742	9710.62		14.0466	9957.58		7.04632	9950.49		15.0471	2597.97		8.04662	9943.4		16.0471	6957.78		1.04672	8796.44
1.04819	11785.5		9.04963	10092.2		2.04834	10505.6		10.0478	9842.36		3.04649	10582.1		11.0481	9728.58		4.04839	7633.04		12.0471	9406.34		5.04877	9680.15		13.0476	9635.93		6.04887	9329.58		14.0483	9616.93		7.04778	9802.03		15.048	2527.14		8.04752	9704.28		16.0483	6695.45		1.04776	8774.34
1.04909	11440.3		9.05088	9909.42		2.04938	10314.2		10.0493	9699.18		3.04823	10490.9		11.0493	9362.14		4.05006	7437.72		12.0488	9210.35		5.05016	9320.01		13.0493	9480.35		6.04978	9025.86		14.0494	9423.46		7.04951	9696.88		15.0492	2491.59		8.04898	9640.83		16.0492	6472.31		1.0495	8624.18
1.05069	11208		9.05165	9598.86		2.05049	10069.2		10.0512	9368.87		3.04975	10032.7		11.0502	9131.31		4.05152	7210.92		12.0505	8878.13		5.05092	8947.13		13.0509	9163.96		6.05103	8820.81		14.0503	9249.42		7.05083	9347.4		15.051	2471.37		8.05078	9322.85		16.0507	6514.8		1.05103	8329.42
1.05236	10969.9		9.05297	9272.4		2.05209	9824.68		10.0523	9072.29		3.05073	9692.45		11.0517	8985.76		4.05256	7046.49		12.0516	8694.38		5.05217	8893.09		13.0519	8773.78		6.0529	8742.69		14.0519	9011.49		7.05174	9061.46		15.0525	2361.83		8.0521	9037.28		16.0526	6259.01		1.05207	8076.45
1.05347	10635.6		9.05463	9066.41		2.05375	9597.5		10.0532	8923.69		3.05184	9540.29		11.0535	8677.95		4.05367	6937.24		12.0526	8525.27		5.05384	8673.9		13.053	8565.7		6.05436	8416.62		14.0537	8822.59		7.05313	8877.67		15.0533	2316.56		8.05301	8727.54		16.0537	6073.68		1.05311	7903.31
1.05444	10468.9		9.05595	8678.18		2.05486	9124.04		10.0548	8716.4		3.05364	9320.53		11.0547	8355.74		4.05527	6883.44		12.0542	8365.17		5.05522	8398.55		13.0547	8448.8		6.05519	8156.02		14.0549	8594.21		7.055	8561.72		15.0544	2306.07		8.0544	8616.27		16.0545	5929.1		1.05471	7753.81
1.05597	10192.5		9.05693	8567.31		2.0559	8846.03		10.0566	8414.06		3.05524	8960.86		11.0556	8270.71		4.05694	6610.67		12.056	8018.54		5.05627	8266.08		13.0564	8161.19		6.05624	8104.9		14.0558	8332.53		7.05625	8170.83		15.0561	2194.4		8.05627	8516.67		16.0559	5702.3		1.05644	7560.84
1.0577	9844.23		9.05818	8326.7		2.05743	8748.62		10.0577	8145.64		3.05607	8799.12		11.0571	8198.57		4.05805	6331.07		12.0569	7773.71		5.05745	7981.68		13.0574	7870.13		6.0579	7986.04		14.0573	8182.59		7.05701	8120.53		15.0577	2130.11		8.05752	8159.73		16.0576	5624.05		1.05762	7264.32
1.05902	9459.85		9.05991	8160.97		2.05924	8499.46		10.0585	7882.82		3.05712	8605.14		11.0589	7809.83		4.05909	6100.92		12.0578	7536.84		5.05911	7761.12		13.0584	7795.7		6.0595	7581.84		14.0591	7946.75		7.05833	8099.52		15.0587	2108.06		8.05828	7951.36		16.0589	5453.81		1.05853	6995.32
1.05999	9094.2		9.06151	7893.19		2.06042	8128.22		10.0599	7685.41		3.05878	8403.88		11.0602	7442.7		4.06062	5992.79		12.0593	7389.55		5.06078	7533.71		13.06	7611.33		6.06054	7308.84		14.0603	7627.15		7.06	7803		15.0597	2053.14		8.0596	7789.61		16.0598	5344.46		1.06005	6883.77
1.06131	8957.46		9.06248	7514.9		2.06132	7955.19		10.0616	7470.19		3.06031	8128.84		11.061	7256.12		4.06235	5868.93		12.061	7266.36		5.06182	7201.86		13.0618	7359.71		6.06158	7322		14.0611	7342.25		7.06132	7401.92		15.0613	2005.2		8.06127	7534.98		16.0612	5205.52		1.06186	6671.07
1.06312	8687.16		9.06359	7338		2.06285	7738.52		10.0629	7317.43		3.06135	7845.46		11.0622	7119.71		4.06353	5617.51		12.0621	7011.11		5.06286	7010.13		13.0628	7036.49		6.06318	7097.87		14.0624	7134.55		7.06229	7293.38		15.0631	1949.3		8.06259	7179.82		16.0629	5019.54		1.06311	6364.93
1.06451	8354.07		9.06526	7173.65		2.06465	7390.74		10.0639	7110.75		3.06239	7644.7		11.064	6927.91		4.06444	5447.05		12.0631	6783.04		5.06439	6899.26		13.0636	6816.31		6.06492	6769.04		14.0642	6966.02		7.06354	7160.02		15.0643	1881.49		8.06356	6998.27		16.0644	4781.09		1.06401	6142.35
1.06541	8158.75		9.06693	6871.49		2.06584	7122.73		10.0651	6947.19		3.06392	7308.09		11.0654	6643.74		4.06596	5365.11		12.0646	6448.57		5.06613	6593.32		13.0652	6693.95		6.06603	6390.81		14.0655	6773.77		7.06528	6823.27		15.0652	1871.57		8.06481	6847.02		16.0653	4572.66		1.06547	6027.08
1.06673	8006.77		9.06797	6593.01		2.0666	6911.82		10.0668	6734.65		3.06566	7193.17		11.0663	6422.74		4.06784	5083.1		12.0663	6298.05		5.06731	6285.64		13.0668	6482.29		6.067	6220.03		14.0664	6544.73		7.06681	6655.97		15.0667	1801.89		8.06655	6617.08		16.0664	4505.45		1.06735	5892.36
1.06854	7711.06		9.06901	6373.45		2.06799	6752.7		10.0684	6534.71		3.06691	6924.23		11.0676	6409.37		4.06895	4951.86		12.0677	6039.55		5.06821	6138.51		13.068	6182.37		6.06846	6137.63		14.0676	6362.37		7.06785	6361.04		15.0684	1723.81		8.06808	6337.87		16.0682	4418.65		1.0686	5633.65
1.06999	7305.69		9.07067	6363.46		2.06972	6463.62		10.0694	6157.8		3.06781	6715.01		11.0693	6197.97		4.06971	4791.01		12.0686	5778.45		5.06981	6095.22		13.069	6035.68		6.07026	5921.38		14.0694	6189.83		7.06896	6086.74		15.0697	1673.72		8.06912	6196.4		16.0698	4177.95		1.06936	5415.25
1.07083	6981.81		9.07241	6059.9		2.07104	6304.05		10.0705	6074		3.06927	6596.81		11.0709	5819.71		4.0711	4717.22		12.0699	5718.83		5.07161	5826.21		13.0705	5783.28		6.07151	5699.87		14.071	5884.97		7.07063	6042.32		15.0706	1610.77		8.07023	5983.31		16.0708	4108.65		1.07068	5340.31
1.07194	6899.4		9.07338	5730.76		2.07195	6051.13		10.0722	5842.16		3.07107	6229.36		11.0719	5623.64		4.07284	4455.29		12.0717	5517.47		5.07272	5445.06		13.0722	5579.43		6.07242	5465.88		14.0719	5628.36		7.07229	5698.62		15.0721	1576.69		8.07189	5755.32		16.0719	4065.22		1.07242	5061.5
1.07367	6700.51		9.07429	5578.11		2.07327	5823.91		10.0739	5493.7		3.07239	5927.72		11.0729	5489.98		4.07409	4288.52		12.0732	5283.61		5.07349	5267.3		13.0736	5378.75		6.07387	5299.3		14.073	5534.89		7.07333	5560.55		15.0739	1502.45		8.07356	5530.1		16.0736	3872.02		1.07374	4861.53
1.07513	6473.61		9.07581	5439.67		2.075	5728.51		10.0749	5240.61		3.0733	5730.92		11.0747	5373.44		4.07506	4200.96		12.0741	5019.11		5.07495	5159.45		13.0745	5104.5		6.07568	5108.62		14.0748	5345.29		7.07438	5370.5		15.0752	1455.39		8.0746	5246.42		16.0753	3630.11		1.07471	4610.47
1.0761	6126.96		9.07748	5181.59		2.07653	5474.26		10.0759	5146.54		3.07469	5721.19		11.0763	5071.88		4.07638	4025.64		12.0753	4906.7		5.07661	4968.96		13.0757	5099.64		6.07693	4801.69		14.0764	5141.83		7.07604	5260.29		15.0759	1447.26		8.07564	5040.67		16.0762	3446.39		1.07596	4531.5
1.07722	5922.36		9.07866	4911.15		2.07743	5167.94		10.0776	4974.05		3.07649	5459.91		11.0774	4764.42		4.07812	3823.67		12.0771	4766.9		5.07786	4770.39		13.0775	4912.71		6.07769	4588.56		14.0774	4881.06		7.07778	5010.41		15.0772	1463.69		8.07731	5002.9		16.0771	3424.63		1.07769	4378.14
1.07888	5792.45		9.07956	4740.72		2.07861	5024.88		10.0793	4659		3.07781	5227.82		11.0784	4677.05		4.07964	3661.86		12.0786	4514.47		5.07884	4615.82		13.079	4617.78		6.07901	4493.21		14.0785	4665.44		7.07875	4697.34		15.079	1380.97		8.07905	4743.82		16.0787	3303.46		1.07922	4156.1
1.08055	5332.73		9.08102	4741.59		2.08035	4766.66		10.0802	4472.39		3.07857	4925.43		11.0801	4525.16		4.08062	3415.35		12.0794	4221.49		5.08016	4436.46		13.0799	4374.83		6.08075	4316.94		14.0802	4513.32		7.07965	4509.67		15.0803	1277.86		8.08002	4551.49		16.0803	3142.56		1.08019	4002.72
1.08166	5061.51		9.08276	4461.63		2.08195	4543.23		10.0812	4313.47		3.07982	4793.4		11.0818	4325.07		4.0818	3343.4		12.0805	4113.23		5.08196	4237.78		13.0811	4234.39		6.08207	4113.93		14.0819	4302.4		7.08118	4407.31		15.0813	1207.69		8.08085	4370.33		16.0814	2973.32		1.08137	3789.96
1.0827	4951.15		9.08415	4151.77		2.08292	4303.84		10.0827	4267.78		3.08156	4528.82		11.0828	4095.17		4.08346	3210.65		12.0821	4015.29		5.08342	3983.42		13.083	4074.19		6.08297	3842.87		14.0828	4085.09		7.08278	4198.81		15.0825	1181.83		8.08238	4231.07		16.0824	2866.55		1.08304	3701.84
1.08423	4767.28		9.08505	3914.51		2.08403	4177.68		10.0843	4099.46		3.08295	4283.41		11.0836	3930.68		4.08506	2979.14		12.0837	3755.56		5.08432	3729.48		13.0845	3799.67		6.08429	3755.38		14.0837	3916.59		7.08396	3963.01		15.0842	1127.26		8.08405	4013.62		16.0839	2794.47		1.08471	3468.35
1.08597	4392.91		9.08637	3806.29		2.08577	4021.41		10.0855	3862.78		3.08392	4095.33		11.0852	3762.41		4.08603	2827.26		12.0847	3562.46		5.0855	3637.92		13.0853	3556.51		6.08603	3595.78		14.0852	3787.96		7.08493	3752.02		15.0858	1073.1		8.08523	3766.6		16.0857	2680.59		1.08568	3218.05
1.08715	4090.84		9.08818	3551.13		2.08743	3735.46		10.0865	3587.42		3.0851	3907.62		11.0869	3505.44		4.08714	2733.4		12.0858	3472.26		5.08731	3526.63		13.0864	3457.56		6.08755	3366.72		14.0869	3550.37		7.08639	3592.9		15.0868	1031.33		8.0862	3618.29		16.087	2471.06		1.08672	3060.31
1.08805	4010.9		9.08963	3283.11		2.08834	3514.41		10.088	3409.84		3.08677	3733.31		11.0881	3245.99		4.08888	2655.91		12.0874	3287.92		5.08884	3264.01		13.088	3408.37		6.08853	3071.75		14.088	3319.7		7.08813	3375.54		15.0879	1036.54		8.08766	3432.01		16.0878	2390.66		1.08846	2958.12
1.08965	3875.49		9.09054	3092.34		2.08924	3423.25		10.0898	3267.25		3.08843	3488.07		11.0891	3115.4		4.09055	2446.25		12.0892	3032.46		5.08974	3040.1		13.0896	3204.24		6.08964	2933.94		14.089	3169.19		7.08952	3096.98		15.0895	995.231		8.08939	3243.88		16.0892	2311.08		1.09019	2745.45
1.09145	3575.97		9.09179	2941.2		2.09084	3266.04		10.0911	2983.4		3.08948	3268.14		11.0905	3006.73		4.09138	2263.35		12.0903	2824.42		5.09092	2892.92		13.0905	2948.36		6.09137	2871.12		14.0905	3045.65		7.09042	2894.97		15.0912	932.599		8.09078	3086.58		16.091	2117.65		1.0911	2572.78
1.09256	3288.01		9.09359	2782.19		2.0925	2994.08		10.092	2835.94		3.09052	3104.48		11.0922	2786.82		4.09235	2163.63		12.0912	2680.5		5.09266	2739.73		13.0916	2698.08		6.09297	2704.06		14.0922	2862.34		7.09174	2922.35		15.0922	869.717		8.09169	2844.2		16.0924	1924.51		1.092	2416.3
1.0934	3079.53		9.09505	2535.62		2.09354	2781.46		10.0934	2710.45		3.09212	2973.67		11.0936	2535.82		4.09395	2079.38		12.0927	2611.03		5.09425	2531.85		13.0932	2633.09		6.09394	2455.31		14.0935	2604.02		7.09347	2674.57		15.0933	810.079		8.09294	2711.96		16.0933	1856.25		1.09353	2308.25
1.09479	2910.59		9.09588	2399.99		2.09459	2577.03		10.0951	2532.62		3.09385	2690.24		11.0945	2399.73		4.09555	1897.08		12.0945	2386.56		5.09516	2328.46		13.095	2420.24		6.09506	2325.6		14.0945	2475.72		7.09493	2447.2		15.0949	826.387		8.09474	2523.75		16.0946	1777.49		1.09519	2102.94
1.09645	2731.82		9.097	2319.39		2.09611	2412.52		10.0965	2268.53		3.09489	2474.43		11.0958	2291.11		4.09666	1753.7		12.0958	2132.58		5.09613	2255.31		13.0961	2271.04		6.09672	2173.69		14.0958	2370.39		7.09583	2276.1		15.0967	764.369		8.0962	2328.29		16.0964	1674.89		1.0963	1880.25
1.09777	2499.91		9.09866	2191.62		2.09785	2218.19		10.0975	2096.24		3.09587	2394.66		11.0976	2188.62		4.09763	1678.67		12.0967	2010.73		5.09779	2134.79		13.0971	2080.64		6.09839	1950.66		14.0976	2199.42		7.09708	2185.74		15.0976	682.156		8.0971	2180.01		16.0978	1508.84		1.09728	1786.42
1.09867	2383.61		9.10019	1922.51		2.0991	2088.95		10.0987	2016.89		3.09753	2245.36		11.099	1975.41		4.09916	1612.11		12.0981	1894.76		5.09939	1926.98		13.0986	2016.16		6.09936	1835.18		14.099	1987.55		7.09896	2024.88		15.0985	634.635		8.09835	2044.25		16.0987	1346.15		1.09874	1711.75
1.09999	2214.4		9.10116	1750.38		2.1	1882.09		10.1006	1845.82		3.09934	2057.07		11.1	1764.69		4.10089	1475.06		12.0999	1727		5.10043	1713.13		13.1004	1860.87		6.10026	1734.13		14.0999	1790.82		7.10042	1845		15.1	597.496		8.10023	1849.2		16.0998	1275.23		1.10054	1556.9
1.1018	2066.69		9.10227	1635.33		2.10146	1790.21		10.102	1647.81		3.10031	1860.61		11.1012	1687.87		4.10214	1314.68		12.1012	1536.93		5.10148	1651.73		13.1016	1611.63		6.10186	1640.76		14.1012	1670.7		7.10118	1689.29		15.1017	584.431		8.10169	1651.32		16.1015	1234.96		1.10186	1407.53
1.10326	1832.59		9.10387	1508.58		2.1032	1674.39		10.1028	1512.71		3.10114	1732.69		11.103	1540.73		4.10312	1201.52		12.1019	1423.7		5.103	1549.03		13.1025	1479.09		6.10346	1489.35		14.103	1539.22		7.10229	1586.05		15.1029	536.764		8.10245	1498.47		16.103	1075.46		1.10276	1313.86
1.10416	1671.66		9.10561	1349.11		2.10459	1456.06		10.1039	1447.29		3.10267	1653.47		11.1045	1381.3		4.10451	1118.48		12.1033	1323.57		5.10474	1429.42		13.104	1388.92		6.10464	1297.44		14.1044	1355.97		7.10403	1413.05		15.1038	495.835		8.10356	1452.78		16.1039	984.011		1.10408	1237.89
1.10534	1573.39		9.10672	1193.52		2.10549	1309.33		10.1057	1386.94		3.10434	1465.49		11.1053	1224.79		4.10631	1018.16		12.105	1193.09		5.10599	1232.5		13.1058	1226.4		6.10561	1188.52		14.1053	1280.81		7.10549	1237.68		15.1053	478.004		8.1053	1335.78		16.1051	955.482		1.10589	1151.93
1.10715	1411.68		9.10769	1091.46		2.10681	1177.25		10.1071	1213.69		3.10552	1311.57		11.1064	1186.3		4.10763	893.563		12.1064	1063.28		5.10689	1099		13.1071	1100.19		6.10707	1080.73		14.1064	1215.15		7.10653	1140.94		15.107	438.724		8.10676	1184.67		16.1068	876.496		1.10735	999.516
1.10867	1240.43		9.10922	1019.78		2.10861	1092.84		10.1082	1035.69		3.10649	1189.04		11.1081	1087.19		4.10853	794.219		12.1073	998.243		5.10835	1078.12		13.1078	996.764		6.10881	961.596		14.1081	1082.91		7.10764	1050.66		15.1083	413.12		8.1078	1062.82		16.1085	762.404		1.10825	875.356
1.10965	1103.18		9.11102	922.88		2.11	975.807		10.1093	952.44		3.10788	1089.19		11.1096	875.127		4.10992	753.4		12.1085	940.428		5.11016	978.864		13.1091	951.492		6.11012	856.848		14.1096	926.599		7.10924	999.287		15.1093	371.043		8.10884	985.043		16.1095	700.712		1.1095	785.347
1.11076	1013.66		9.11227	796.343		2.11084	821.278		10.1109	899.984		3.10968	979.541		11.1106	809.885		4.11173	687.658		12.1103	812.82		5.11141	837.254		13.1109	848.328		6.1111	774.775		14.1105	829.605		7.1109	860.689		15.1106	357.193		8.11051	907.291		16.1105	635.136		1.1113	738.411
1.11249	928.698		9.11318	707.977		2.11202	760.045		10.1126	807.351		3.11107	851.492		11.1117	743.672		4.11305	593.196		12.1119	708.239		5.11231	728.918		13.1122	757.948		6.11242	706.479		14.1117	769.219		7.11201	731.358		15.1124	327.325		8.11217	794.04		16.1121	575.409		1.11276	638.712
1.11416	798.445		9.1147	681.115		2.11368	736.55		10.1137	687.378		3.11198	743.284		11.1134	718.042		4.11388	501.105		12.1128	651.22		5.1137	695.657		13.1131	641.739		6.11422	673.635		14.1133	737.379		7.11299	660.167		15.1138	287.687		8.11335	671.067		16.1138	499.017		1.11353	575.365
1.11506	652.693		9.11651	590.885		2.11514	610.27		10.1147	615.378		3.11323	721.794		11.115	601.6		4.11506	502.48		12.114	597.27		5.11557	610.613		13.1143	628.202		6.11561	582.841		14.115	604.025		7.11451	589.414		15.1147	276.294		8.11433	607.714		16.115	448.962		1.11471	539.46
1.11604	608.862		9.11769	501.996		2.11611	542.407		10.1162	608.045		3.11496	627.066		11.1161	519.109		4.11673	461.35		12.1156	550.337		5.11682	512.417		13.1161	561.562		6.11651	498.907		14.1161	503.926		7.11632	530.824		15.116	273.923		8.11578	577.407		16.1159	410.218		1.11637	499.852
1.11763	605.307		9.11845	451.118		2.11729	479.393		10.118	547.456		3.11649	528.393		11.1171	476.656		4.11819	407.096		12.1173	463.996		5.11766	482.197		13.1177	456.656		6.11783	459.537		14.1171	499.679		7.1175	470.336		15.1179	266.148		8.11759	522.008		16.1175	384.702		1.11783	421.229
1.11916	521.778		9.11977	415.706		2.11896	466.614		10.1192	440.987		3.11739	491.439		11.1186	425.992		4.11916	383.706		12.1183	402.554		5.11891	433.167		13.1187	433.373		6.11964	399.417		14.1186	485.072		7.1184	445.07		15.1193	234.906		8.11884	443.382		16.1193	334.181		1.11887	394.493
1.12027	459.254		9.12151	381.463		2.12063	421.22		10.1202	385.525		3.11864	456.588		11.1204	373.622		4.12034	331.792		12.1194	371.493		5.12057	394.358		13.1198	395.856		6.12103	339.403		14.1204	443.024		7.11993	423.001		15.1201	213.588		8.11974	421.963		16.1204	293.854		1.11999	323.767
1.12131	416.663		9.12283	332.812		2.12167	346.993		10.1217	367.601		3.12045	402.247		11.1216	330.573		4.122	316.466		12.121	334.796		5.12203	322.687		13.1214	365.206		6.12186	308.14		14.1216	367.318		7.12174	366.423		15.1212	186.863		8.1212	371.35		16.1212	278.31		1.12158	298.071
1.12284	377.007		9.12373	299.061		2.12271	310.639		10.1234	342.102		3.12198	356.924		11.1225	304.692		4.12367	287.284		12.1228	290.991		5.123	292.897		13.1231	327.543		6.12297	282.393		14.1225	311.495		7.12299	316.156		15.1229	197.886		8.12301	334.623		16.1226	282.527		1.12332	259
1.12458	350.527		9.12505	264.031		2.12424	292.011		10.1246	287.066		3.12281	311.399		11.1241	280.153		4.12471	256.42		12.1237	268.302		5.12418	291.257		13.1241	278.316		6.12471	267.583		14.124	285.903		7.12375	268.528		15.1244	174.529		8.12426	299.154		16.1243	254.598		1.12443	252.009
1.12583	288.134		9.12679	237.023		2.12597	234.873		10.1254	266.557		3.12385	268.97		11.1259	248.764		4.12576	232.761		12.1246	242.302		5.12585	259.477		13.1252	253.062		6.12617	241.872		14.1258	273.288		7.12507	264.818		15.1254	153.387		8.12502	251.27		16.1255	212.234		1.1254	214.545
1.1268	268.865		9.12831	221.554		2.12715	219.591		10.1268	247.789		3.12552	246.37		11.127	245.496		4.12735	214.784		12.1261	232.863		5.12745	230.644		13.1268	238.562		6.12721	219.395		14.1269	244.577		7.12681	247.682		15.1265	154.049		8.12634	243.104		16.1265	207.367		1.127	183.562
1.12819	263.041		9.12929	186.324		2.12806	211.706		10.1284	210.123		3.12705	244.735		11.1278	216.621		4.12909	196.022		12.1278	204.143		5.12849	214.184		13.1286	208.089		6.12832	196.249		14.1278	216.517		7.12813	201.006		15.1281	138.958		8.12801	212.535		16.1278	199.932		1.12874	171.988
1.12999	246.704		9.13047	161.06		2.12965	187.221		10.1298	183.872		3.12802	216.412		11.1292	188.587		4.1302	177.171		12.129	191.569		5.12953	195.67		13.1295	170.437		6.12992	181.573		14.1292	206.514		7.12903	197.161		15.1298	130.041		8.12932	184.161		16.1296	178.826		1.12992	135.642
1.13131	223.561		9.1322	168.117		2.13146	160.938		10.1307	182.22		3.12906	200.761		11.1309	185.307		4.1311	166.315		12.1299	181.859		5.1312	183.634		13.1304	155.913		6.13158	155.105		14.1308	197.224		7.13035	188.325		15.1309	125.439		8.1303	179.467		16.131	144.019		1.13082	137.297
1.13222	175.942		9.1338	166.384		2.13257	147.935		10.1321	172.405		3.13066	190.642		11.1322	164.505		4.1327	158.812		12.1314	160.58		5.13286	159.611		13.1319	165.42		6.13269	141.985		14.1321	175.548		7.13208	167.615		15.1319	119.922		8.13162	158.311		16.132	150.181		1.13242	146.838
1.13361	171.832		9.13477	146.996		2.1334	150.834		10.1338	164.502		3.13239	159.966		11.1331	147.959		4.13451	157.282		12.1332	149.572		5.13391	144.124		13.1336	149.42		6.13367	145.594		14.1331	139.379		7.13354	142.337		15.1334	111.754		8.13335	167.756		16.1332	145.859		1.13422	130.146
1.13548	161.114		9.13581	131.207		2.13479	146.924		10.1352	155.388		3.13357	137.765		11.1344	143.307		4.13555	129.549		12.1344	128.028		5.13488	141.437		13.1347	127.745		6.13519	135.221		14.1344	142.009		7.13451	122.869		15.1352	101.545		8.13488	153.679		16.1349	137.655		1.13533	107.942
1.1368	155.075		9.13755	125.21		2.13653	137.199		10.1362	141.079		3.13455	143.39		11.1361	135.532		4.13638	122.973		12.1354	120.82		5.13654	131.327		13.1357	119.356		6.13693	128.974		14.1361	137.217		7.1357	127.22		15.1364	93.293		8.13585	140.688		16.1364	128.702		1.13617	93.5704
1.13763	132.382		9.13922	119.648		2.13778	136.677		10.1374	129.478		3.136	145.66		11.1377	111.909		4.13784	126.14		12.1367	112.106		5.13828	106.52		13.1372	111.3		6.13811	123.495		14.1376	106.618		7.13743	114.259		15.1372	92.9292		8.1369	134.876		16.1374	106.382		1.13755	96.7704
1.13881	140.363		9.14019	107.209		2.13875	103.883		10.1391	117.62		3.13781	133.599		11.1387	106.376		4.1395	125.541		12.1385	109.869		5.13932	102.323		13.1389	114.092		6.13908	120.259		14.1386	115.786		7.13903	113.579		15.1388	94.7454		8.13863	111.387		16.1385	108.369		1.13929	107.232
1.14055	137.789		9.14109	99.2905		2.14007	103.126		10.1407	107.85		3.13906	130.253		11.1398	126.003		4.14076	93.979		12.1399	102.177		5.14016	93.5376		13.1402	103.648		6.14061	109.353		14.1398	109.305		7.14007	107.268		15.1406	81.8677		8.1403	106.281		16.1403	103.961		1.14054	106.928
1.14201	119.564		9.14269	93.1827		2.14188	102.649		10.1417	101.238		3.13996	125.821		11.1416	108.121		4.14173	97.0746		12.1408	98.4614		5.14161	90.8744		13.1412	104.289		6.14242	102.822		14.1415	107.146		7.14111	91.1607		15.1418	81.7276		8.14134	107.528		16.1419	97.7665		1.14158	81.2295
1.14298	101.697		9.14429	97.1849		2.14327	85.0767		10.1428	101.092		3.14149	115.094		11.1431	102.947		4.14305	97.0746		12.1421	96.5944		5.14328	97.8083		13.1425	91.2263		6.14353	85.7776		14.1431	97.7576		7.14278	94.7693		15.1425	80.2961		8.14238	99.3054		16.1428	88.0173		1.1429	72.4108
1.14416	107.88		9.1454	103.021		2.14424	81.9483		10.1446	103.185		3.1433	115.544		11.1442	99.2875		4.14485	83.7854		12.144	83.3529		5.14446	93.6121		13.1443	88.9627		6.14429	85.9297		14.144	80.9104		7.14444	88.903		15.1439	75.5452		8.14405	104.787		16.1437	73.7081		1.14464	83.7048
1.14583	103.275		9.14637	89.6098		2.14542	96.3827		10.1462	81.7455		3.14448	95.4045		11.1452	89.3027		4.14624	96.836		12.1454	73.222		5.14543	89.2072		13.1457	72.2915		6.14568	85.3928		14.1451	75.757		7.14542	92.9471		15.1456	71.194		8.14578	90.2003		16.1453	77.6448		1.14617	75.2917
1.14749	98.2705		9.1479	86.8124		2.14715	85.1125		10.1471	70.6303		3.14531	89.8812		11.147	72.214		4.14721	92.6787		12.1462	75.1784		5.14682	87.9994		13.1466	65.4143		6.14742	88.4109		14.1469	76.258		7.14632	92.6667		15.1469	73.4099		8.14676	77.2243		16.147	72.2199		1.14707	73.3115
1.14854	98.8968		9.14963	78.1667		2.14875	72.205		10.148	89.4369		3.14656	94.7693		11.1487	67.6421		4.14839	85.876		12.1473	82.8608		5.14856	81.7306		13.1479	65.7364		6.14874	82.4254		14.1485	76.8545		7.14792	80.2662		15.1479	83.9106		8.14766	77.5016		16.148	77.8446		1.14825	81.0923
1.14958	98.1393		9.15095	78.1279		2.14972	70.4693		10.1496	86.04		3.1483	94.3398		11.1496	68.8618		4.1502	75.1724		12.149	76.4041		5.14995	70.4514		13.1498	74.8145		6.14964	74.233		14.1494	85.0141		7.14952	70.86		15.1491	80.1947		8.14919	84.9008		16.1491	75.6526		1.14999	57.4097
1.15117	89.0014		9.15186	68.1133		2.15084	66.2881		10.1513	89.246		3.14962	95.1301		11.1505	62.7004		4.15173	76.0075		12.1505	54.0576		5.15092	77.5672		13.1512	67.6957		6.15096	65.7006		14.1503	79.461		7.15063	74.6475		15.1508	76.2789		8.15085	79.2373		16.1506	69.9325		1.15158	58.2507
1.15291	95.8369		9.15324	64.9431		2.15257	69.0974		10.1524	76.3296		3.15059	81.4442		11.1521	71.03		4.15263	84.4325		12.1515	59.3035		5.15217	66.3865		13.152	59.6643		6.15269	63.27		14.1519	65.3815		7.1516	78.2681		15.1524	60.7201		8.15196	60.0342		16.1523	65.3397		1.15255	54.5318
1.15402	101.79		9.15505	65.5574		2.15417	59.1067		10.1534	64.2989		3.15184	72.5748		11.1537	61.6357		4.15381	74.7698		12.1526	56.2108		5.15391	68.6829		13.1531	64.2034		6.15422	62.2828		14.1535	65.3188		7.15313	72.1334		15.1533	59.6912		8.15294	60.7708		16.1536	68.4115		1.15367	59.6793
1.15499	90.6924		9.15644	52.1042		2.15507	57.0667		10.1549	61.0809		3.15357	74.0063		11.1549	62.8524		4.15562	83.4633		12.1542	58.0867		5.15543	63.0881		13.1548	66.2076		6.15512	56.7894		14.1546	70.0786		7.15486	69.2436		15.1545	64.6836		8.1544	67.7852		16.1545	68.9006		1.1554	63.6517
1.15659	83.4484		9.15734	60.1206		2.15604	58.4744		10.1566	74.3254		3.15517	62.2858		11.1559	62.2232		4.15721	77.1079		12.1559	58.1583		5.15634	59.715		13.1562	58.534		6.15631	51.293		14.1556	65.793		7.15611	56.2824		15.1563	61.4865		8.15613	66.7205		16.1559	57.3829		1.15707	58.042
1.15833	77.8028		9.15866	63.1		2.15764	49.6974		10.158	68.2117		3.15614	65.6051		11.1574	63.8128		4.15805	75.1456		12.157	55.9842		5.15759	58.2865		13.1573	45.4029		6.15804	66.2821		14.1571	63.3952		7.15708	51.9014		15.1579	64.2691		8.15745	60.7589		16.1577	63.3594		1.15797	58.9068
1.15944	79.6399		9.16047	57.9018		2.15924	49.5781		10.1589	60.9318		3.15718	66.6817		11.1591	66.4998		4.15902	61.4985		12.158	60.1684		5.15939	60.0998		13.1584	47.3891		6.15964	63.4101		14.1589	65.2443		7.1584	54.8181		15.1588	55.2833		8.15835	58.4505		16.159	56.679		1.15887	71.8024
1.1602	73.0013		9.16186	46.9954		2.16035	49.271		10.1602	56.4047		3.15892	66.2523		11.1604	65.62		4.16069	68.1222		12.1596	56.3659		5.16092	68.5069		13.16	47.2042		6.16061	72.5539		14.1602	50.3058		7.16021	60.061		15.1599	56.3748		8.15974	55.3072		16.1599	58.206		1.16047	62.6854
1.16166	67.0098		9.16269	46.8642		2.16139	54.6898		10.1621	58.1642		3.16059	79.2045		11.1614	62.6854		4.16221	70.1472		12.1613	59.9715		5.16175	65.0325		13.1617	52.0773		6.16165	60.3771		14.1611	49.9062		7.1616	51.7433		15.1616	55.1342		8.16155	52.4173		16.1613	53.9651		1.16214	69.3002
1.1634	68.5397		9.1638	50.6876		2.16292	49.2829		10.1634	55.6054		3.16163	67.4154		11.1627	57.4008		4.16325	66.5833		12.1625	59.4973		5.16279	57.8064		13.1628	56.0557		6.16346	50.5355		14.1625	57.2546		7.1625	48.3136		15.1633	49.942		8.16294	53.1718		16.1632	54.8598		1.16318	55.7008
1.16458	72.6911		9.16547	59.9924		2.16465	46.9626		10.1643	53.2643		3.16267	61.6297		11.1645	48.7222		4.1643	61.0303		12.1634	52.295		5.16446	59.0112		13.1638	55.9275		6.16512	50.452		14.1643	47.8782		7.16382	59.718		15.1642	55.5756		8.16384	51.7731		16.1645	45.2985		1.16415	49.1218
1.16555	70.8063		9.16693	57.2159		2.1659	47.9915		10.1656	55.7545		3.16434	60.5471		11.1659	44.4187		4.16582	67.5526		12.1649	52.4859		5.16599	45.0897		13.1653	46.5451		6.16603	47.4696		14.1657	52.2801		7.16563	55.1938		15.1651	57.4395		8.16516	51.4868		16.1653	48.5134		1.16568	50.8546
1.16694	67.9105		9.16797	47.6486		2.16681	45.6713		10.1675	55.3847		3.16607	59.0112		11.1668	52.5545		4.16756	74.0302		12.1668	53.0615		5.16703	43.1482		13.1671	37.2492		6.16693	58.9724		14.1666	52.0624		7.16701	55.2773		15.1667	63.932		8.16696	56.4076		16.1664	50.6965		1.16749	43.0468
1.16867	67.2812		9.16908	52.8945		2.16827	51.5137		10.1689	53.1331		3.16705	58.1911		11.1681	50.6667		4.16881	69.6611		12.168	60.1654		5.16807	48.4657		13.1683	37.4788		6.16853	56.5269		14.1679	52.3845		7.16785	54.4632		15.1683	55.7575		8.16842	52.5575		16.1682	45.8383		1.16874	42.5697
1.17013	65.2085		9.17074	59.1752		2.17	49.265		10.1696	57.8958		3.16788	55.3489		11.17	55.7814		4.16971	61.5253		12.1687	52.5783		5.16967	55.9543		13.1692	43.7119		6.17012	51.0812		14.1697	56.1571		7.16903	49.2501		15.1695	57.1502		8.16919	54.0307		16.1696	51.6687		1.16971	54.8867
1.17111	67.4929		9.17241	62.7928		2.17132	51.6508		10.1708	45.0122		3.16941	51.293		11.1713	48.1168		4.17117	65.9958		12.1701	51.8268		5.17134	51.0812		13.1707	36.0026		6.17124	51.9878		14.1711	46.9626		7.1707	47.7023		15.1704	53.0853		8.1703	53.3985		16.1706	52.638		1.1711	52.5962
1.17229	64.3705		9.17352	55.7754		2.17222	54.8568		10.1725	40.3866		3.17107	50.9589		11.1722	42.844		4.17298	62.0621		12.1719	52.0296		5.17259	57.1085		13.1726	43.8401		6.17221	47.401		14.1719	42.2506		7.17215	52.7871		15.172	46.39		8.17203	50.5146		16.1718	47.5144		1.17283	52.7275
1.17402	61.5671		9.17456	48.1854		2.17361	52.5485		10.1739	38.797		3.17225	61.3136		11.1733	49.2113		4.1743	60.0342		12.1732	46.7032		5.17356	48.245		13.1737	43.8759		6.17374	48.4777		14.173	42.9126		7.17319	41.7734		15.1737	54.9553		8.17349	51.2989		16.1735	43.7775		1.17415	50.4877
1.17555	58.4177		9.17609	44.4038		2.17549	55.7993		10.175	40.6759		3.17323	60.2966		11.175	47.9856		4.1752	67.5854		12.1741	43.5509		5.17502	48.8326		13.1746	44.0101		6.17554	47.1774		14.1748	59.0709		7.17431	42.0507		15.1749	56.9952		8.17453	44.2756		16.1751	50.4311		1.17505	54.2007
1.17652	60.8722		9.17783	42.0627		2.17681	53.2702		10.1761	44.6812		3.17468	58.707		11.1765	42.859		4.17659	61.406		12.1754	54.9135		5.17675	45.9248		13.1759	42.4235		6.17686	48.3434		14.1762	52.5754		7.17597	43.2586		15.1759	47.6784		8.17564	48.5224		16.1761	48.3106		1.17644	51.3258
1.1777	62.6228		9.17901	45.6355		2.17757	47.1893		10.1777	57.9286		3.17642	57.0518		11.1775	41.9941		4.17846	55.7307		12.1771	48.1198		5.178	49.7272		13.1776	47.0968		6.17776	46.2349		14.1771	49.8644		7.17764	38.8119		15.1773	41.2396		8.17724	46.9925		16.1771	56.2317		1.17832	45.3432
1.17944	67.3468		9.17991	53.0496		2.17882	52.4501		10.1794	50.2223		3.17774	59.0649		11.1786	47.07		4.17971	56.7804		12.1787	51.624		5.17891	51.8238		13.1789	51.9252		6.17915	45.9188		14.1783	45.6236		7.17868	42.8709		15.1791	45.8025		8.17891	46.232		16.1788	54.3081		1.17964	44.2338
1.18104	65.6618		9.18151	47.6038		2.18056	47.6366		10.1805	53.1748		3.17871	58.6921		11.1802	41.666		4.18055	56.3719		12.1796	49.7958		5.18043	54.5825		13.1799	47.067		6.18089	47.1326		14.18	44.6096		7.17972	44.3322		15.1804	51.5733		8.18002	43.4733		16.1805	53.9771		1.1804	40.1629
1.18187	56.2466		9.18331	46.8046		2.18202	50.1627		10.1815	48.7789		3.18003	55.2833		11.1819	45.1822		4.1818	57.9018		12.1808	46.9686		5.18224	55.0298		13.1812	38.0008		6.18221	38.8805		14.1817	42.9872		7.18125	47.0521		15.1813	46.7032		8.18099	43.1154		16.1816	50.3416		1.18158	40.8429
1.18291	53.8995		9.18443	52.9839		2.18299	54.0904		10.1832	55.0865		3.18177	55.6561		11.183	41.1024		4.18346	66.6609		12.1826	45.2359		5.18342	48.8326		13.1829	44.6066		6.18311	38.9283		14.1828	55.7366		7.18299	44.3054		15.1827	47.8365		8.18259	39.1549		16.1826	47.234		1.18332	43.3988
1.18458	57.9286		9.18526	48.3494		2.18417	53.5536		10.1849	57.699		3.18323	67.1679		11.1841	46.0083		4.18485	70.6214		12.1842	43.5866		5.18425	46.8821		13.1844	49.5662		6.1845	36.9719		14.1837	52.6708		7.18417	43.8521		15.1845	55.0895		8.18433	39.1221		16.1842	36.8078		1.18478	48.0154
1.18611	53.4223		9.18665	52.4978		2.18584	53.0108		10.186	43.5688		3.1842	65.6499		11.1856	46.8642		4.18582	67.147		12.1851	42.0418		5.1855	51.3347		13.1853	44.9406		6.18631	38.8298		14.1853	36.772		7.18514	39.3517		15.1858	52.7364		8.18551	48.3136		16.186	45.5818		1.18575	44.3501
1.18722	51.3377		9.18831	54.0814		2.18743	50.2641		10.1869	46.1514		3.18545	69.2346		11.1873	49.6825		4.18701	67.8687		12.1862	45.3641		5.18724	46.1335		13.1865	46.0083		6.18769	44.1861		14.1871	41.4513		7.18667	42.0269		15.1867	57.9823		8.18648	53.5506		16.187	44.1384		1.18693	46.6256
1.18826	55.2744		9.18956	50.2193		2.18847	44.8243		10.1885	47.3205		3.18725	53.3299		11.1885	48.09		4.18874	75.2291		12.188	39.6977		5.18856	45.0629		13.1882	41.7794		6.18853	50.267		14.1882	42.3192		7.18847	37.7562		15.1878	52.5843		8.18801	47.7142		16.1878	43.8461		1.1886	50.2372
1.18979	56.855		9.19054	51.6866		2.18959	43.9147		10.1903	50.0643		3.18871	53.5476		11.1894	39.7454		4.19034	61.2092		12.1896	47.24		5.18953	42.3818		13.1898	40.661		6.18964	48.3405		14.1892	47.3682		7.18958	43.5658		15.1895	43.2288		8.18981	48.7669		16.1893	37.3596		1.19026	45.7608
1.19159	64.3496		9.19186	55.6442		2.19118	50.5205		10.1914	59.1782		3.18948	51.9849		11.191	51.0932		4.19138	52.7901		12.1905	47.6694		5.19078	48.2719		13.1908	39.3189		6.19137	46.3274		14.1908	47.231		7.19042	48.6626		15.191	41.9672		8.19092	44.7945		16.191	41.2634		1.19137	55.9871
1.19277	66.6251		9.19366	58.9665		2.19292	59.2617		10.1922	60.9795		3.19059	56.8729		11.1928	39.5456		4.19242	63.1		12.1915	43.2198		5.19252	54.4393		13.1919	42.9574		6.19283	45.4118		14.1925	43.6254		7.19181	46.0709		15.192	52.8855		8.19176	55.1789		16.1922	46.6883		1.19235	54.4781
1.19367	57.875		9.19512	45.8979		2.19403	53.0108		10.1937	56.2675		3.19232	66.6937		11.1939	42.7128		4.19402	56.2526		12.193	41.2276		5.19404	54.7346		13.1936	44.1086		6.19381	48.8862		14.1936	43.2586		7.19347	39.2444		15.1931	66.3269		8.19314	56.2615		16.1932	48.0452		1.19394	39.7335
1.19513	67.6242		9.19602	55.7426		2.195	46.6316		10.1953	50.5265		3.19378	54.329		11.1947	44.1026		4.19576	52.7424		12.1947	46.8284		5.19509	52.5366		13.1953	47.7619		6.19492	46.4049		14.1944	42.2386		7.19479	39.7245		15.1947	59.5301		8.19481	50.5891		16.1946	42.346		1.19568	46.6644
1.19694	65.7274		9.1972	47.1446		2.1966	41.9672		10.1966	44.0072		3.19482	56.6492		11.1961	40.7236		4.19687	58.6623		12.1958	44.8601		5.1962	44.2547		13.1962	62.4439		6.19665	43.3212		14.1959	43.8103		7.19569	37.3506		15.1964	54.1292		8.19613	51.4659		16.1963	49.3395		1.19686	52.2354
1.19826	57.0608		9.19894	47.6724		2.19841	48.5969		10.1975	48.5194		3.19593	67.7792		11.1978	40.0317		4.19784	59.0888		12.1968	40.9652		5.19786	37.2462		13.1971	50.2402		6.19832	42.4027		14.1976	50.95		7.19701	35.2302		15.1975	52.2384		8.19703	47.6098		16.1977	43.5717		1.19776	43.7208
1.19916	62.4647		9.20054	42.7576		2.19945	46.724		10.1989	45.5759		3.19753	62.6914		11.1991	46.9477		4.19944	63.5115		12.1983	40.6491		5.19953	48.1198		13.1987	40.9801		6.19936	53.8578		14.1988	50.2999		7.19882	44.4306		15.1986	57.9167		8.19835	40.9652		16.1987	46.1037		1.19936	48.415
1.20055	60.8752		9.20151	50.7621		2.20028	44.7736		10.2007	55.8798		3.1992	52.8139		11.2001	47.6247		4.20117	63.7829		12.2001	40.7713		5.20057	48.919		13.2004	44.204		6.20033	47.5591		14.1998	44.0847		7.20028	47.8573		15.2001	54.0963		8.20016	37.956		16.1998	44.8422		1.20117	47.0491
1.20242	62.7153		9.20262	52.0922		2.20174	41.6481		10.2021	57.5051		3.20031	54.3976		11.2014	49.095		4.20221	60.4517		12.2014	58.6832		5.20161	46.7837		13.2015	53.3597		6.20193	46.3542		14.2011	44.1264		7.20118	42.9454		15.2018	51.785		8.20162	44.0907		16.2017	37.4222		1.20228	56.3778
1.20367	63.765		9.20436	50.616		2.20347	43.187		10.203	54.3797		3.20128	58.212		11.2031	42.0955		4.20305	65.125		12.2023	58.0867		5.20328	48.6983		13.2025	54.9105		6.20367	46.5898		14.2028	50.6667		7.20236	52.1817		15.203	55.3042		8.20252	47.571		16.2032	34.9439		1.20304	47.9021
1.20451	62.7242		9.20602	50.6458		2.20465	47.4398		10.2043	51.5703		3.20288	60.3324		11.2047	45.388		4.20457	56.3629		12.2037	50.5325		5.20495	40.989		13.204	46.3214		6.20485	45.0897		14.2043	50.6905		7.2041	58.8919		15.2039	45.4148		8.2037	50.4669		16.2041	38.1767		1.2045	49.3425
1.20576	62.7212		9.20693	52.1668		2.20563	49.4916		10.206	46.3453		3.20462	58.9277		11.2056	47.7828		4.20624	56.6045		12.2055	49.0294		5.20592	43.1751		13.2058	46.6704		6.20575	48.3524		14.2053	47.8394		7.2057	50.0046		15.2055	55.6949		8.20544	53.0466		16.2053	41.8569		1.20624	43.8282
1.20749	66.983		9.20783	51.2154		2.20702	41.5139		10.2075	49.1308		3.2058	58.0658		11.2068	46.4497		4.20742	60.8155		12.2068	49.1308		5.20675	41.0666		13.2071	47.413		6.20735	48.251		14.2064	41.6392		7.20667	34.0492		15.2073	53.8965		8.20703	52.7871		16.2071	47.2668		1.20749	49.9807
1.20888	62.6497		9.20949	51.293		2.20882	47.747		10.2085	54.3588		3.20677	58.2567		11.2085	43.4286		4.20839	52.8736		12.2077	46.4944		5.20828	52.1757		13.208	39.0535		6.20908	49.265		14.2083	48.0571		7.20778	46.7777		15.2083	51.5494		8.20808	50.6905		16.2086	41.0487		1.20846	36.3605
1.20986	58.5102		9.21109	52.0624		2.21021	51.8149		10.2096	53.8965		3.2083	63.3177		11.2101	52.5276		4.20978	67.2603		12.2091	47.8633		5.20995	61.1823		13.2093	41.3618		6.21019	43.3481		14.2098	48.2957		7.20951	47.7887		15.2092	52.644		8.20912	57.4157		16.2094	45.1106		1.20978	35.591
1.21104	68.155		9.21213	43.7179		2.21111	44.6722		10.2114	47.0849		3.2101	56.4852		11.2111	49.9688		4.21159	64.0424		12.2109	46.7598		5.21113	62.256		13.2111	41.1232		6.21103	42.9186		14.2108	53.5387		7.21111	44.0489		15.2106	50.1716		8.21085	44.2726		16.2105	45.5759		1.21158	47.7768
1.21277	64.9699		9.21318	47.4875		2.21236	50.0732		10.213	50.103		3.21128	50.5355		11.2122	46.1425		4.21298	56.0647		12.2123	48.9071		5.2121	55.0835		13.2125	46.894		6.21242	42.2506		14.2119	51.5435		7.21202	56.3898		15.2123	48.931		8.21252	39.134		16.2121	46.8523		1.21304	45.6504
1.21437	62.8047		9.2147	49.1576		2.21417	57.5797		10.2139	59.9357		3.21205	49.9241		11.2139	45.7339		4.21388	58.0927		12.2131	47.237		5.21356	46.05		13.2134	55.7843		6.21415	51.5256		14.2137	50.1239		7.21299	54.2037		15.2136	50.1776		8.21342	48.9101		16.2137	51.448		1.21394	50.7442
1.21541	61.4657		9.21644	44.6334		2.2157	47.5949		10.2149	52.6976		3.21343	51.624		11.2156	45.1494		4.21513	65.3785		12.2142	52.8766		5.21529	41.0487		13.2147	44.374		6.2154	46.5451		14.2153	52.6589		7.21458	50.6905		15.2145	62.76		8.21439	52.7573		16.2147	48.9071		1.21512	54.7882
1.21645	55.0089		9.21769	49.438		2.2166	42.4444		10.2165	52.6976		3.2151	66.7414		11.2165	43.7835		4.21694	73.7976		12.216	51.5733		5.21668	53.2911		13.2166	51.4391		6.21637	50.6219		14.2161	44.4843		7.21625	56.0587		15.2158	54.824		8.21599	43.9743		16.2157	49.4857		1.21686	58.9635
1.21812	59.3661		9.21859	51.7701		2.21778	39.5873		10.2181	54.4483		3.21642	61.7937		11.2175	45.2687		4.21839	67.0068		12.2174	43.5866		5.21759	48.6685		13.218	49.6646		6.21769	45.5311		14.2171	48.7282		7.21729	51.961		15.2176	60.2996		8.21759	38.3885		16.2173	46.0471		1.21846	54.2902
1.21979	62.9688		9.22005	44.705		2.21959	42.1909		10.2192	52.7394		3.21739	54.9463		11.2191	45.4745		4.2193	62.9419		12.2184	39.3547		5.21891	47.0074		13.2187	51.9968		6.2195	48.3434		14.2187	60.5948		7.21826	50.5205		15.2191	57.186		8.2187	51.4152		16.2191	43.6433		1.21943	50.8605
1.2209	61.1316		9.22186	45.5729		2.22111	48.2689		10.2202	48.7431		3.21864	54.2484		11.2207	43.9743		4.22055	48.7162		12.2195	44.4664		5.22064	57.3262		13.2199	50.8456		6.22089	48.1854		14.2203	58.4983		7.21979	48.7073		15.22	48.5552		8.21967	50.3088		16.2203	44.3978		1.22054	42.1402
1.22187	64.1319		9.22318	50.947		2.22195	52.3517		10.2218	42.352		3.22038	57.9913		11.2218	45.0211		4.22235	45.9546		12.2212	44.04		5.2221	56.9594		13.2216	41.0218		6.22186	44.6961		14.2214	46.6256		7.2216	47.4607		15.2212	47.7529		8.2212	39.4621		16.2212	50.2999		1.22235	44.6901
1.22347	60.4726		9.22408	40.4791		2.22299	52.0684		10.2235	49.268		3.22191	63.4787		11.2228	55.173		4.22388	61.7102		12.2228	48.5582		5.22307	56.3569		13.2231	43.196		6.22304	50.8397		14.2224	48.4389		7.22285	47.5293		15.2229	57.1532		8.22294	45.2478		16.2227	49.5901		1.22387	54.3677
1.2252	51.8596		9.22547	51.9371		2.22465	58.209		10.2248	61.4239		3.22288	67.1321		11.2243	48.6805		4.22471	60.6217		12.224	46.894		5.22432	56.0677		13.2241	45.5192		6.22478	53.8071		14.2239	49.9569		7.22375	46.3721		15.2245	57.2367		8.22419	46.2171		16.2245	42.513		1.22478	49.7302
1.22624	58.1791		9.22727	45.3283		2.22618	55.2117		10.2257	61.1108		3.22406	63.7501		11.2261	46.3304		4.22575	67.5764		12.2249	51.0932		5.22613	51.6121		13.2252	41.3857		6.22631	45.0897		14.2257	38.2543		7.22514	44.028		15.2255	61.4836		8.22516	49.0234		16.2257	50.3863		1.22575	40.2733
1.22708	58.8412		9.22866	36.3814		2.22722	46.0411		10.2271	53.3359		3.22573	51.63		11.2274	46.9507		4.22742	66.2344		12.2265	44.2845		5.22759	47.5084		13.2268	52.471		6.22728	49.4976		14.2269	41.7794		7.22701	42.6532		15.2266	58.1911		8.22648	48.245		16.2267	49.4916		1.22735	44.4187
1.22854	60.0938		9.22943	42.7009		2.22827	44.5261		10.2289	43.6165		3.22732	57.8869		11.2283	43.3868		4.22895	62.9538		12.2283	47.3056		5.22835	50.1627		13.2285	51.5137		6.22846	57.1264		14.2278	56.9146		7.22833	54.1948		15.2283	52.5187		8.22828	42.3192		16.228	49.1248		1.22901	48.0154
1.23027	63.4996		9.23061	40.8459		2.22986	49.3992		10.2302	44.362		3.22837	58.2149		11.2297	45.7936		4.22999	57.8899		12.2294	58.8263		5.22946	44.4992		13.2296	54.4125		6.23019	44.5171		14.2293	54.2693		7.22917	53.142		15.2299	50.3177		8.22967	44.8034		16.2299	48.6834		1.23005	36.4708
1.23145	60.1594		9.23227	43.1214		2.2316	46.3751		10.2311	52.9989		3.22941	54.7047		11.2315	39.7991		4.23103	61.5999		12.2303	47.908		5.23113	49.1457		13.2305	56.3808		6.23179	46.1872		14.231	42.2207		7.23056	47.2161		15.2308	54.2693		8.23058	48.2033		16.2312	44.8213		1.2311	34.2579
1.23242	59.6763		9.23373	46.6733		2.23278	46.1365		10.2325	51.9849		3.23114	46.3363		11.2328	39.647		4.23263	63.27		12.2319	47.6247		5.23266	49.605		13.2322	54.0337		6.23269	46.6167		14.2324	44.2099		7.23243	48.4627		15.2318	61.0392		8.23189	55.2773		16.2319	51.6896		1.23262	37.622
1.23388	60.7797		9.2347	53.5208		2.23368	47.6128		10.2343	48.8266		3.23281	46.7926		11.2337	45.2896		4.23437	64.5106		12.2337	48.1824		5.23363	50.2432		13.2339	43.4942		6.23367	44.532		14.2333	40.5626		7.23375	51.1438		15.2334	53.0466		8.23377	60.5083		16.2332	43.9743		1.23436	40.0138
1.23562	57.1413		9.23588	53.81		2.23514	47.3533		10.2357	49.438		3.23378	56.5389		11.235	46.1514		4.23548	68.9036		12.2348	42.2953		5.23474	42.012		13.235	40.3836		6.23526	45.6564		14.2347	34.6218		7.23452	51.6568		15.235	52.0684		8.23516	48.4389		16.2349	40.2882		1.23561	45.8204
1.23701	53.6669		9.23755	50.0821		2.23695	52.0982		10.2364	48.2152		3.23468	54.6928		11.2369	43.527		4.23645	57.7527		12.2356	41.8241		5.23634	43.4674		13.236	47.0074		6.23686	48.6327		14.2365	45.4536		7.23576	49.5871		15.2361	51.1826		8.23592	53.151		16.2363	43.7835		1.23651	42.856
1.23791	66.1241		9.23915	50.9351		2.23827	51.111		10.2377	45.7965		3.23621	52.3099		11.2382	45.9427		4.23791	51.7343		12.237	49.2978		5.23807	45.5281		13.2376	52.9273		6.23797	46.2976		14.2378	45.8293		7.23743	41.8569		15.2371	57.3918		8.2371	49.9599		16.2373	47.4845		1.23797	41.2425
1.23916	60.6425		9.24019	62.9837		2.23917	44.9704		10.2394	42.2386		3.23788	71.364		11.239	53.7862		4.23971	54.3051		12.2387	49.438		5.23918	44.6901		13.2394	46.3274		6.23901	45.2985		14.2386	44.5559		7.23889	48.9041		15.2386	51.624		8.23877	47.8036		16.2385	54.4334		1.23978	43.0946
1.24097	53.7027		9.24123	56.1064		2.24056	40.5417		10.2407	41.335		3.23906	66.9531		11.2402	47.9259		4.24096	61.749		12.24	50.1656		5.24016	53.3806		13.2405	35.2272		6.24054	41.2425		14.2399	51.967		7.23986	48.6417		15.2404	47.5352		8.24023	48.6506		16.2402	47.6396		1.2411	45.8711
1.24249	63.8575		9.2429	52.3457		2.24243	44.881		10.2417	55.7456		3.24003	49.2411		11.2419	46.1723		4.24187	54.6362		12.241	49.4887		5.24168	53.2076		13.2413	39.9184		6.24228	40.2673		14.2415	51.5733		7.24097	46.2827		15.2416	53.5446		8.2412	55.501		16.2418	43.5807		1.24193	47.8066
1.2434	60.1922		9.24456	52.6947		2.24368	49.6527		10.243	46.4288		3.24149	47.4517		11.2434	45.0241		4.24339	57.9465		12.2423	49.6169		5.24349	57.4515		13.2427	46.906		6.24346	44.5529		14.243	45.9129		7.24271	42.9007		15.2425	49.8853		8.24238	46.0948		16.2428	47.8424		1.24332	51.1409
1.24458	58.2955		9.24568	53.7981		2.24445	53.9025		10.2446	40.4015		3.2433	45.6415		11.2443	48.5194		4.2452	56.3689		12.244	49.0592		5.24467	45.6176		13.2445	53.1659		6.24436	48.3852		14.2439	46.5123		7.24431	47.9528		15.244	56.8132		8.24405	40.1987		16.2439	51.7194		1.24519	36.6498
1.24638	48.4538		9.24672	52.468		2.2457	43.0767		10.2463	55.7724		3.24455	52.1101		11.2454	42.4086		4.24645	54.5049		12.2455	46.3155		5.24557	43.3898		13.2457	49.8793		6.24582	48.0601		14.2451	48.4806		7.24535	42.4981		15.2458	49.7392		8.24571	45.209		16.2455	55.4801		1.24651	45.1375
1.24791	54.0307		9.24831	51.1677		2.24743	52.2652		10.2473	58.54		3.24545	53.4552		11.2472	47.6098		4.24721	57.6423		12.2465	50.3028		5.2471	47.9468		13.2466	48.2092		6.24762	42.8709		14.2468	48.1049		7.24639	37.3953		15.2471	55.8559		8.24676	52.8587		16.2472	52.6231		1.24728	50.5205
1.24874	58.212		9.25005	52.0475		2.24882	52.972		10.2484	53.3209		3.24684	58.0867		11.2488	44.6006		4.24853	56.7357		12.2476	46.2171		5.24891	42.2565		13.248	48.1824		6.24894	44.4426		14.2484	44.7557		7.24799	40.0496		15.248	70.0816		8.24773	58.3163		16.2482	44.4903		1.24853	48.2182
1.24979	60.2698		9.25109	47.2519		2.24979	58.4535		10.25	53.1867		3.24864	59.211		11.2499	37.6011		4.25027	67.7047		12.2494	47.067		5.25009	47.407		13.2498	45.221		6.24978	46.1425		14.2494	45.4655		7.24972	41.1292		15.2494	70.1144		8.2494	53.7325		16.2492	47.1714		1.25026	46.5809
1.25145	58.3521		9.25193	49.3008		2.25104	58.8412		10.2517	63.3237		3.25003	59.7717		11.2509	50.2283		4.25159	59.384		12.251	46.2618		5.25085	51.1975		13.2512	45.6623		6.25117	46.7598		14.2505	51.46		7.25083	50.8993		15.2512	59.3094		8.25106	48.6655		16.2509	42.7605		1.25165	45.1017
1.25305	62.1337		9.25338	48.3375		2.25271	47.5502		10.2528	53.5476		3.25093	64.2213		11.2525	53.6818		4.25249	61.3136		12.2519	46.39		5.25224	52.5664		13.2521	47.6844		6.25304	48.3703		14.2521	51.2005		7.25181	49.3127		15.2525	60.2399		8.25217	45.546		16.2526	45.0838		1.25262	43.8372
1.25409	61.9727		9.25512	45.1375		2.25431	54.4274		10.2538	48.5552		3.25219	58.0778		11.2543	42.7069		4.25374	63.5891		12.2531	49.5692		5.25391	49.7422		13.2533	38.2811		6.25429	41.678		14.2538	46.1216		7.2534	42.5637		15.2533	61.4865		8.25315	45.2925		16.2536	43.2258		1.2538	42.6681
1.25513	64.609		9.2563	47.1058		2.25535	44.5708		10.2555	56.5538		3.25406	45.5729		11.2554	44.1682		4.25548	54.493		12.2549	46.0411		5.25523	48.0721		13.2551	43.6314		6.25512	39.0535		14.2549	40.9443		7.25514	41.7704		15.2545	57.3322		8.25474	45.7816		16.2544	50.0135		1.25547	45.6832
1.25673	73.9616		9.25727	51.3198		2.25639	35.9996		10.2572	47.9915		3.25545	54.6302		11.2563	47.7559		4.25707	45.1375		12.2565	43.4942		5.2562	52.0087		13.2566	37.8964		6.25637	44.7289		14.2559	43.2884		7.25618	35.3405		15.2562	49.8495		8.25655	54.2335		16.256	44.3203		1.25714	47.9528
1.2584	61.0362		9.25859	42.4921		2.25813	42.4653		10.2582	42.1014		3.25628	61.1704		11.2579	46.3572		4.25805	55.85		12.2574	49.3694		5.25745	50.1209		13.2576	40.4164		6.25804	45.8562		14.2575	47.1803		7.25702	37.458		15.2577	48.4448		8.25759	45.728		16.2576	45.0331		1.25818	53.3776
1.25958	60.3592		9.2604	42.8828		2.25979	50.7621		10.2591	51.6359		3.25739	68.7604		11.2597	48.7312		4.25909	62.3335		12.2583	49.2232		5.25918	54.2991		13.2587	48.7371		6.25943	39.7901		14.2593	50.789		7.25847	34.8007		15.2586	60.2578		8.25842	49.0592		16.2588	40.1033		1.25922	47.1744
1.26055	65.4322		9.26179	52.966		2.26084	48.8355		10.2605	45.3015		3.25913	62.921		11.2607	50.3565		4.26082	59.2647		12.26	55.7545		5.26071	49.6915		13.2605	39.2384		6.2604	40.2524		14.2603	53.4671		7.26014	37.3953		15.2598	57.7855		8.25981	46.062		16.2598	40.1361		1.26089	47.5472
1.26201	62.9628		9.26276	43.6582		2.26188	52.5664		10.2622	48.3226		3.26059	73.2399		11.2616	47.7679		4.26249	59.1902		12.2616	49.5423		5.26168	49.8555		13.2621	43.2347		6.26158	51.627		14.2612	55.4593		7.26139	38.3646		15.2615	61.5581		8.26155	54.9881		16.2612	44.705		1.26255	45.9636
1.26381	59.1574		9.26401	38.2602		2.26354	45.8681		10.2634	45.3253		3.26156	64.5404		11.263	38.7732		4.26353	64.3078		12.2627	52.7811		5.26286	51.6568		13.263	41.0338		6.26325	44.9048		14.2626	48.3494		7.26236	38.1529		15.2631	50.6637		8.2628	55.6114		16.2629	46.56		1.26367	60.8334
1.26506	54.2246		9.26575	44.2845		2.26528	45.8711		10.2643	48.4985		3.26274	53.0674		11.2647	38.9551		4.26457	61.5313		12.2637	52.3994		5.26453	46.9626		13.2639	39.5754		6.26492	45.1941		14.2643	40.5447		7.26368	52.0714		15.2641	49.4439		8.2637	47.6187		16.2643	52.6052		1.26464	58.1613
1.26597	53.7862		9.26727	52.5336		2.26625	51.2184		10.2657	51.794		3.26441	56.5776		11.2659	40.3121		4.26624	62.2828		12.2653	43.703		5.2662	52.1459		13.2656	38.8418		6.26596	52.3159		14.2655	47.3772		7.26549	43.4375		15.2652	50.6607		8.26509	50.0881		16.2653	41.833		1.26624	52.6857
1.26742	55.6054		9.26824	60.568		2.26709	51.1588		10.2675	47.4488		3.266	67.4512		11.2669	48.7043		4.26798	66.9502		12.267	48.7282		5.26717	58.2358		13.2672	36.7541		6.267	46.5004		14.2664	46.4765		7.26688	39.2682		15.2668	49.9807		8.26683	43.6642		16.2665	47.1207		1.26804	42.3371
1.2693	65.3964		9.26936	57.4515		2.26861	55.9871		10.2689	52.5247		3.26712	59.0798		11.2683	47.9557		4.26888	58.1821		12.2683	45.2776		5.26821	44.0698		13.2682	54.159		6.2686	34.9976		14.2678	50.1448		7.26785	45.7578		15.2686	46.4855		8.26828	38.8865		16.2683	42.3907		1.26908	47.2102
1.27055	71.7994		9.27116	48.752		2.27028	50.0016		10.2698	54.9344		3.26809	53.8965		11.2701	45.1673		4.26978	48.9071		12.2692	42.4742		5.26995	38.9491		13.2693	57.6334		6.27033	45.5102		14.2696	45.8085		7.26903	48.6864		15.2697	58.9665		8.26919	53.1271		16.2698	48.2242		1.26992	54.9284
1.27131	52.9989		9.27276	41.2157		2.27146	44.6841		10.2711	46.5004		3.26968	57.4395		11.2715	46.5302		4.27131	65.5485		12.2706	46.9775		5.27161	42.1372		13.2708	53.4074		6.27138	48.9936		14.271	51.1409		7.27076	49.9539		15.2706	56.0915		8.27037	54.0218		16.2707	47.8663		1.27137	48.7968
1.27263	65.4232		9.27359	41.0904		2.2725	36.4589		10.2729	35.5612		3.27142	68.0924		11.2725	39.6738		4.27298	75.6526		12.2724	51.9043		5.27252	38.2214		13.2725	56.2227		6.27235	55.1909		14.272	39.4084		7.27229	50.9291		15.2722	57.8541		8.27217	44.6662		16.2719	45.555		1.27304	47.2549
1.2743	63.5742		9.27463	45.6564		2.27396	44.3084		10.2744	53.4164		3.2726	61.0541		11.2736	49.772		4.27409	65.289		12.2737	49.5334		5.27342	49.5364		13.2738	50.3834		6.27401	50.1925		14.2732	53.5058		7.27326	51.5912		15.274	52.301		8.2737	47.8931		16.2737	53.5029		1.27422	43.2407
1.27562	58.5311		9.27623	46.8523		2.2757	42.4951		10.2753	46.0292		3.2735	49.6408		11.2754	51.0603		4.27513	61.9935		12.2746	39.5247		5.27502	47.9856		13.2747	48.3405		6.27575	44.8183		14.275	56.7297		7.27445	51.4898		15.275	59.3542		8.27467	44.0012		16.2752	42.4832		1.27519	49.9807
1.27659	52.5605		9.27783	54.6511		2.27709	48.1019		10.2765	49.5781		3.2751	59.8254		11.2769	52.5783		4.27659	61.6506		12.276	37.2253		5.27668	46.4735		13.2761	47.3354		6.27679	46.3692		14.2765	49.1815		7.27618	52.8438		15.2758	60.1952		8.27578	45.0599		16.276	40.6461		1.27665	47.1446
1.27784	54.9761		9.27887	45.5818		2.27799	54.2634		10.2783	37.9023		3.27691	62.1516		11.2779	54.8598		4.27832	62.3126		12.2778	43.4226		5.27779	52.0415		13.278	41.8002		6.27762	50.4848		14.2774	43.1065		7.27778	43.3898		15.2773	60.741		8.27759	47.5144		16.2771	47.7679		1.27839	42.856
1.27958	56.1184		9.27991	47.917		2.27931	49.2978		10.2798	35.9787		3.27802	57.1562		11.2791	54.1799		4.27964	54.2455		12.2792	53.1181		5.27877	43.7268		13.2792	43.697		6.27908	38.4272		14.2786	48.1377		7.27868	42.012		15.279	53.9025		8.27919	48.5671		16.2788	44.547		1.27978	49.6706
1.28117	59.9954		9.28144	48.6715		2.28111	46.396		10.2807	39.0446		3.27885	52.5247		11.2808	46.4676		4.28062	63.4877		12.2799	53.7862		5.28029	39.9333		13.2802	46.4407		6.28075	46.8076		14.2804	56.3271		7.27965	41.6959		15.2802	49.0353		8.28002	48.7759		16.2803	37.3834		1.28068	47.2817
1.28215	56.7268		9.28318	53.145		2.2825	43.2526		10.2817	47.7738		3.28024	60.0103		11.2824	43.9236		4.28194	56.0856		12.2812	38.3467		5.28203	48.9489		13.2816	48.582		6.282	55.847		14.282	53.4283		7.28125	45.8115		15.2812	46.3811		8.28106	46.1932		16.2813	39.8408		1.282	42.3937
1.28326	71.9098		9.28443	53.4492		2.28347	41.4543		10.2834	47.6247		3.28198	56.3868		11.2833	47.8812		4.28367	52.8438		12.2828	34.3981		5.28328	50.6667		13.2834	52.2861		6.28297	45.9308		14.2828	43.7358		7.28285	47.6486		15.2825	50.3327		8.28266	42.006		16.2824	44.2219		1.28374	44.8064
1.28492	57.5141		9.28533	48.0661		2.28472	47.2102		10.2849	52.1668		3.28323	61.6029		11.2843	45.1882		4.28513	64.7671		12.2843	48.2838		5.28425	53.9323		13.2848	52.1608		6.28436	46.3363		14.2839	40.5805		7.28396	52.7692		15.2843	51.0544		8.28426	46.2707		16.284	45.9486		1.28526	37.4908
1.28659	58.9128		9.28679	46.0918		2.28653	48.0661		10.2859	53.7325		3.2842	58.2895		11.2859	41.7644		4.2861	65.2055		12.2853	46.0381		5.28557	52.5754		13.2855	43.1065		6.2861	42.7576		14.2855	43.8103		7.285	54.3648		15.2857	54.1411		8.28537	53.7444		16.2858	42.5727		1.28617	35.2958
1.28763	57.028		9.28859	40.9741		2.28799	46.8195		10.287	47.5561		3.28552	54.4542		11.2875	43.3093		4.28735	70.2755		12.2865	45.2388		5.28738	51.7433		13.2868	42.5428		6.28749	47.0581		14.2871	44.4575		7.28653	41.4692		15.2867	54.6362		8.28641	48.2838		16.2869	44.5291		1.28742	35.5344
1.28867	54.5556		9.28991	45.3731		2.28882	39.3637		10.2886	51.8507		3.28725	58.7696		11.2886	45.3015		4.28916	59.6017		12.2881	49.945		5.28877	57.3322		13.2884	43.2288		6.28846	41.8629		14.288	46.8732		7.28827	51.8924		15.2879	65.9451		8.28794	44.2368		16.2878	40.7952		1.28922	45.0778
1.29034	52.8289		9.29074	47.4159		2.28993	41.5378		10.2903	58.1255		3.28878	50.8963		11.2896	41.9881		4.29062	63.5354		12.2898	46.4974		5.28974	50.273		13.2899	47.6844		6.28971	42.0448		14.2891	44.7438		7.28951	46.3244		15.2897	58.6474		8.28967	55.0775		16.2894	42.4027		1.29068	42.5428
1.29208	55.2147		9.2922	45.8562		2.2916	49.8495		10.2915	61.6088		3.28975	50.6667		11.2911	46.3155		4.29138	63.6249		12.2908	45.9993		5.29099	46.3185		13.2909	44.0787		6.29144	44.8303		14.2907	41.9136		7.29042	46.0769		15.2912	50.9947		8.29085	58.2418		16.2911	36.951		1.29151	36.1607
1.29305	55.5875		9.29408	42.1372		2.29313	47.6993		10.2925	56.518		3.29093	70.9614		11.2929	53.2255		4.29249	66.9084		12.2919	52.3755		5.29286	50.1239		13.2921	48.3226		6.29297	37.7085		14.2924	48.5641		7.29188	43.5538		15.2921	53.4432		8.29176	58.1404		16.2923	33.5571		1.29255	33.8732
1.29395	60.6306		9.29533	44.8392		2.2941	47.2072		10.2939	48.928		3.29267	63.2252		11.2941	46.8404		4.29416	61.916		12.2935	42.8262		5.29425	43.2944		13.2938	55.5279		6.29387	44.6692		14.2936	47.4517		7.29361	42.4444		15.2933	45.9695		8.29321	48.5969		16.2933	44.1175		1.29422	45.6951
1.29548	58.2686		9.29609	50.3267		2.29521	55.7158		10.2957	46.5362		3.2942	58.0867		11.295	45.3313		4.29569	60.2041		12.2952	38.2065		5.29502	55.3519		13.2954	60.2877		6.29505	47.3354		14.2946	42.0478		7.29493	40.327		15.2951	55.3638		8.29502	49.5185		16.2948	51.3138		1.29582	47.6784
1.29708	55.7694		9.29734	57.6602		2.29681	49.6229		10.297	50.61		3.29517	76.419		11.2965	45.206		4.29673	66.6758		12.2963	46.0441		5.29613	51.6896		13.2964	52.7513		6.29686	53.9144		14.296	42.0269		7.29583	43.8461		15.2967	52.4501		8.29634	57.0041		16.2966	43.7566		1.29686	49.6109
1.29826	57.4843		9.29908	47.5293		2.29854	46.0262		10.2979	51.785		3.29635	58.9605		11.2983	39.7156		4.29784	55.9245		12.2973	42.1014		5.29786	44.7796		13.2975	43.1989		6.29846	47.3414		14.2978	53.0108		7.29722	44.2994		15.2975	53.9234		8.29717	49.5215		16.2978	41.7048		1.2979	48.2898
1.29923	56.3689		9.30047	45.7697		2.29965	49.7004		10.2993	45.9725		3.29809	63.8277		11.2996	41.0934		4.29944	68.8678		12.2989	52.8318		5.29932	47.8275		13.2991	43.196		6.29929	45.0927		14.2991	44.884		7.2991	40.9324		15.2985	52.2026		8.29863	56.0259		16.2986	35.8237		1.2995	43.4852
1.30069	64.618		9.30144	39.9244		2.30063	56.0199		10.3012	40.0854		3.29975	71.1045		11.3005	37.9679		4.3011	69.6014		12.3006	53.3955		5.30029	45.8085		13.3008	42.346		6.30026	44.8243		14.3	42.3549		7.30035	42.9932		15.3002	51.451		8.30051	56.6015		16.2998	39.5486		1.30117	39.5665
1.30242	60.5233		9.30262	41.9404		2.30216	54.2514		10.3024	57.5797		3.30059	65.3457		11.3019	43.0588		4.30221	71.2775		12.3017	44.7885		5.30141	50.6249		13.3019	42.6591		6.30193	51.1677		14.3014	34.9797		7.30118	47.4309		15.3017	50.3028		8.30176	44.5977		16.3016	38.1588		1.30242	42.7039
1.30381	42.346		9.30429	47.6247		2.30396	48.9041		10.3032	57.2427		3.30156	54.0755		11.3038	47.2698		4.30319	60.4964		12.3025	40.989		5.30307	46.7121		13.3029	47.5531		6.30346	53.989		14.3033	45.7399		7.30243	48.2063		15.3027	53.8518		8.30252	38.4213		16.3029	46.6107		1.30339	42.1909
1.30472	45.0689		9.30588	43.4047		2.30514	41.3976		10.3045	48.9101		3.30323	51.6001		11.305	50.267		4.30471	58.6593		12.304	43.9594		5.30474	44.4217		13.3046	42.7963		6.3045	48.2391		14.3045	45.1434		7.30417	45.6951		15.3038	57.4246		8.30377	44.3442		16.3039	47.5352		1.30485	46.0471
1.30604	55.9454		9.30693	43.2795		2.30604	40.6341		10.3062	46.8284		3.30482	51.8775		11.3058	46.3006		4.30652	58.9128		12.3057	43.6224		5.30585	44.4306		13.3064	34.4428		6.30554	49.8853		14.3053	58.209		7.30549	44.0966		15.3054	59.5838		8.30551	44.1801		16.3051	45.5937		1.30658	48.1078
1.30784	62.2232		9.30797	39.0118		2.30757	52.9332		10.3075	48.3733		3.30593	52.137		11.307	40.1122		4.3077	58.197		12.3069	44.4575		5.30689	45.5848		13.3074	46.0232		6.30714	56.3689		14.3066	47.7231		7.30646	48.2271		15.3071	60.5262		8.3069	39.0088		16.3069	48.1913		1.3079	48.254
1.30923	68.0834		9.30963	38.4392		2.30938	49.6378		10.3085	49.086		3.30691	52.1847		11.3088	41.3767		4.30867	59.0798		12.3078	50.3744		5.30842	46.0411		13.3082	52.1101		6.30887	57.2516		14.3083	53.816		7.30771	36.3635		15.3083	54.1321		8.30787	43.5628		16.3084	40.9831		1.3088	43.1154
1.3102	58.033		9.31137	46.0888		2.31056	46.7181		10.3098	49.5781		3.30843	57.7646		11.3102	42.0686		4.3102	55.9484		12.3092	51.6807		5.31016	49.265		13.3097	50.5623		6.31006	45.9486		14.3097	50.6309		7.30938	43.1602		15.3093	46.2737		8.30905	55.3817		16.3094	47.0044		1.31026	43.0081
1.31145	57.1831		9.31248	45.4029		2.31132	41.5348		10.3115	50.4579		3.31024	56.342		11.3111	43.1303		4.31201	60.9885		12.311	46.6167		5.31134	50.3625		13.3114	52.3905		6.31103	46.1127		14.3107	50.8874		7.31097	45.1046		15.3107	53.5655		8.31078	42.8172		16.3105	45.1136		1.31207	46.3304
1.31326	60.398		9.31345	49.8704		2.31271	55.8589		10.313	46.2528		3.31149	50.9112		11.3123	48.0929		4.31319	53.0764		12.3124	38.0664		5.31231	45.6594		13.3125	44.4456		6.31249	46.7688		14.3119	53.2911		7.31201	38.6062		15.3125	54.493		8.31238	45.7876		16.3122	39.2742		1.31332	45.0897
1.31472	56.9713		9.31512	50.6905		2.31438	56.8789		10.314	45.8979		3.31239	60.392		11.314	45.4983		4.31395	62.3276		12.3134	41.0994		5.31384	42.176		13.3135	39.4681		6.31429	48.2629		14.3136	55.9961		7.31306	43.6403		15.3138	58.6086		8.31342	51.8358		16.3139	42.1074		1.31408	41.2246
1.31555	55.1938		9.31686	44.374		2.3157	46.2171		10.3151	47.2668		3.31378	54.2962		11.3156	44.1801		4.31534	67.2186		12.3146	46.9626		5.31564	37.4043		13.315	46.9746		6.31554	52.6469		14.3152	49.0711		7.31472	53.6281		15.3147	50.3028		8.31439	48.6357		16.3148	45.218		1.3154	37.0076
1.31666	61.8265		9.31783	50.6011		2.31667	48.9429		10.3168	41.663		3.31559	57.5051		11.3166	44.2577		4.31701	61.8325		12.3164	49.8943		5.31675	49.6318		13.3167	49.9957		6.31644	52.1578		14.3162	41.4006		7.31639	50.3416		15.3161	42.6919		8.31606	47.3533		16.3159	44.7348		1.31707	40.3419
1.31833	59.9059		9.31873	41.8927		2.31792	49.6258		10.3185	47.6873		3.31691	51.3109		11.3177	43.9058		4.31832	66.5774		12.3179	48.6476		5.31759	50.9291		13.3181	52.9482		6.3179	53.7981		14.3172	42.7576		7.3175	46.4795		15.3179	51.8686		8.31773	42.5577		16.3176	43.9594		1.31846	48.9757
1.31979	59.05		9.32019	47.8096		2.31965	47.8543		10.3196	44.2845		3.31781	54.5228		11.3194	44.4933		4.3193	62.1039		12.3188	46.8076		5.31897	52.1728		13.3191	50.9411		6.31971	50.8814		14.3189	39.3786		7.31847	45.5788		15.3193	56.0229		8.31884	43.2616		16.3193	47.6844		1.31943	40.1033
1.32083	65.2025		9.32186	51.9401		2.32125	46.5421		10.3205	47.0074		3.3192	53.4313		11.3211	43.9177		4.32062	58.9367		12.3201	48.7013		5.32071	50.7144		13.3203	47.5949		6.32096	44.3531		14.3206	40.8459		7.32014	50.8516		15.32	52.3845		8.31988	55.7515		16.3203	52.5098		1.32061	46.2767
1.32194	63.3923		9.32304	44.7796		2.32222	49.1666		10.3222	41.3857		3.32107	58.4565		11.3222	50.0553		4.32235	61.7609		12.3219	49.6169		5.32196	46.9477		13.3221	52.1399		6.32172	40.8936		14.3217	48.5134		7.32188	50.78		15.3213	55.2863		8.32148	51.4272		16.3211	47.8782		1.32235	57.4694
1.32354	60.4099		9.32401	47.7321		2.32334	46.909		10.3239	40.2345		3.32239	58.2477		11.3231	48.0422		4.32381	62.5542		12.3234	46.1783		5.32293	40.8429		13.3236	47.6545		6.32297	44.0012		14.3227	46.5898		7.32285	48.254		15.323	61.9637		8.32321	46.6346		16.3226	42.5041		1.32394	43.5568
1.32527	57.3501		9.3254	51.6658		2.32507	42.7218		10.3249	42.4653		3.32316	62.5065		11.3248	42.8828		4.32478	58.2746		12.3242	51.2065		5.32418	38.2453		13.3245	47.905		6.32471	45.4029		14.3244	41.7943		7.32368	42.1044		15.3244	53.8727		8.32426	51.7254		16.3243	42.686		1.32499	41.1083
1.32638	49.262		9.3272	43.6016		2.32667	42.2744		10.3258	46.4169		3.32441	57.8988		11.3266	40.7236		4.32596	63.9708		12.3253	44.541		5.32592	43.02		13.3257	39.1937		6.3261	44.025		14.3261	38.0365		7.32521	48.8624		15.3254	53.1659		8.32509	50.8933		16.3255	44.5171		1.32603	44.3889
1.32736	50.0971		9.32859	40.9533		2.32771	44.028		10.3273	52.6917		3.32607	52.471		11.3275	42.683		4.3277	71.2477		12.3269	45.2448		5.32745	48.6745		13.3275	43.3033		6.32707	35.7402		14.3271	43.1512		7.32688	49.0473		15.3265	43.0409		8.32655	53.3359		16.3264	43.8222		1.32769	51.5554
1.32888	52.4173		9.32949	49.8972		2.32882	54.9881		10.3289	55.4235		3.32753	59.3184		11.3284	41.9165		4.3293	63.3028		12.3285	46.7926		5.32842	46.0143		13.3291	51.3079		6.32825	41.6929		14.3279	45.9725		7.32806	43.2139		15.3282	39.0982		8.32821	42.17		16.3279	48.1913		1.32943	43.6314
1.33069	60.3712		9.33074	42.0448		2.33049	42.7009		10.3301	44.5917		3.3285	62.6795		11.3299	47.7679		4.33027	62.9479		12.3296	48.0273		5.3296	45.2269		13.3299	51.4212		6.32999	44.9496		14.3294	47.24		7.32903	45.7757		15.3298	48.1317		8.3294	41.2753		16.3297	46.6256		1.33047	47.5084
1.33187	58.4058		9.33255	42.8709		2.33215	53.6043		10.3311	39.3726		3.32968	59.3333		11.3316	55.4772		4.33138	54.7972		12.3306	59.8612		5.33134	54.2842		13.3309	43.3988		6.33158	49.1934		14.3311	45.1613		7.33049	48.5105		15.3308	55.9931		8.33037	49.1964		16.331	51.2959		1.33144	43.1184
1.33284	60.9736		9.33401	41.4692		2.33313	51.1647		10.3325	44.7408		3.33135	54.0457		11.3328	46.2707		4.33312	57.4276		12.3321	49.7243		5.33293	50.3684		13.3325	32.388		6.33262	48.8952		14.3323	50.449		7.33222	43.1602		15.3319	56.351		8.33183	63.0045		16.3319	45.6325		1.33318	40.1957
1.3343	61.8235		9.33491	42.3937		2.33403	43.351		10.3343	46.1962		3.33302	47.6665		11.3337	43.4524		4.33471	70.7109		12.334	48.9369		5.33391	47.8633		13.3341	35.1228		6.33367	46.7509		14.3333	46.8583		7.33361	46.5242		15.3336	55.9245		8.33356	56.0557		16.3333	46.3692		1.33492	42.8709
1.3361	64.0156		9.33616	40.4373		2.33563	39.0237		10.3357	52.0117		3.33406	57.9942		11.3352	44.0847		4.33569	62.9867		12.3351	52.9124		5.33502	39.2653		13.3351	44.8154		6.33533	50.4162		14.3347	38.0187		7.33451	49.6616		15.3352	59.6972		8.33495	41.4304		16.3351	37.2462		1.33589	43.1363
1.33729	51.2274		9.33797	38.8626		2.33722	37.9978		10.3366	52.0475		3.33503	62.4767		11.3369	47.7679		4.33659	57.529		12.336	52.4561		5.33675	45.4417		13.3361	51.2512		6.337	48.7431		14.3364	36.0622		7.33583	46.223		15.3363	51.3586		8.33592	44.6036		16.3364	38.5614		1.33672	43.0409
1.33805	50.2163		9.3395	43.9415		2.3384	47.577		10.3379	48.9161		3.3367	59.5003		11.3383	49.3723		4.33812	68.4861		12.3375	43.5866		5.33842	53.5715		13.3377	44.204		6.33804	41.338		14.3378	45.7339		7.33757	44.5738		15.3373	48.2928		8.33717	41.669		16.3373	38.1081		1.33825	49.9927
1.33944	48.6864		9.34033	44.9466		2.33938	45.8293		10.3397	49.0413		3.33837	60.6754		11.3393	43.0558		4.33978	58.7368		12.3393	42.689		5.33925	50.0434		13.3395	39.313		6.33908	50.1		14.3387	52.4769		7.33903	48.2391		15.339	51.7284		8.33891	43.6642		16.3386	40.5119		1.33992	54.2365
1.3411	68.0417		9.34137	37.7562		2.34084	47.3205		10.3412	55.8112		3.33948	47.7082		11.3405	51.5524		4.34089	57.1592		12.3406	51.788		5.34016	48.1108		13.3407	45.7637		6.34075	47.0223		14.3401	45.3373		7.34	52.1936		15.3407	54.0158		8.34044	47.246		16.3405	42.7784		1.3411	46.5391
1.34242	77.0215		9.34304	46.0948		2.34264	49.6915		10.3421	52.0087		3.34045	58.3014		11.3422	54.8628		4.34187	58.3909		12.3415	42.0418		5.34175	48.2749		13.3416	52.9631		6.34249	48.0064		14.3418	42.6502		7.34118	42.1969		15.3418	41.4632		8.34134	44.0191		16.3419	45.2001		1.34207	54.5765
1.3434	56.0259		9.34456	45.6564		2.34396	39.5367		10.3433	48.5671		3.34205	53.2464		11.3438	54.7077		4.34339	59.384		12.3429	38.1469		5.34342	54.7554		13.3431	56.4912		6.34346	42.8053		14.3433	43.9207		7.34299	43.5538		15.3426	45.0599		8.34252	44.2547		16.3427	45.725		1.34346	43.0588
1.34472	70.0607		9.34561	46.56		2.34486	41.162		10.3451	51.1319		3.34385	53.1271		11.3447	50.5862		4.3452	58.5579		12.3448	45.7816		5.34446	59.3273		13.3449	52.978		6.34429	50.783		14.3442	48.9101		7.34451	48.8654		15.344	59.6972		8.34433	57.1741		16.3438	46.9507		1.34526	47.076
1.34645	56.2615		9.34665	45.1136		2.34625	42.6234		10.3466	49.2441		3.34489	54.7525		11.3459	44.7736		4.34645	47.9408		12.346	47.9528		5.3455	47.0461		13.3461	57.7348		6.34582	47.7738		14.3455	53.3239		7.34535	53.9174		15.3457	54.3737		8.34585	58.4148		16.3455	43.9147		1.34665	48.8803
1.34798	55.1431		9.34825	42.4235		2.34806	50.1597		10.3474	47.6038		3.34566	50.103		11.3477	44.9734		4.34735	51.1438		12.3468	43.3898		5.34703	49.5722		13.3471	52.5933		6.34749	44.9734		14.3473	46.739		7.34639	54.6868		15.3469	50.267		8.34669	49.8853		16.347	36.8019		1.34755	37.3536
1.34895	65.6737		9.34998	55.838		2.34945	53.2285		10.3485	39.4621		3.34719	48.1436		11.3493	51.9371		4.34874	59.5719		12.348	39.0654		5.34877	55.4414		13.3485	49.9062		6.3486	41.9792		14.3487	51.281		7.34806	47.6873		15.3479	50.8456		8.34773	53.8578		16.348	39.5873		1.3488	33.6824
1.35006	66.8726		9.35109	51.2274		2.35035	47.0133		10.3502	40.8608		3.34885	50.9918		11.3501	56.7804		4.35055	64.3734		12.3498	45.3134		5.35002	59.8135		13.3503	42.1969		6.34964	44.708		14.3496	50.0643		7.34958	47.3145		15.3493	56.354		8.34939	53.649		16.3491	35.0125		1.35061	41.5945
1.3518	61.1227		9.35206	41.8987		2.3516	43.3153		10.3516	45.2717		3.35003	56.9027		11.3511	44.8362		4.35194	68.0119		12.3511	51.6151		5.35092	52.1459		13.3516	44.3919		6.3511	33.3185		14.3506	40.8548		7.35063	45.5371		15.3511	56.0199		8.35099	51.7552		16.3507	41.0725		1.35207	41.0308
1.35347	51.4391		9.35359	47.9289		2.3534	44.0996		10.3527	52.972		3.351	57.4515		11.3527	42.9395		4.35284	59.0261		12.3521	44.1115		5.35231	45.2776		13.3523	50.5832		6.35283	34.5055		14.3524	38.5465		7.35167	40.2554		15.3524	54.2842		8.35203	49.5215		16.3524	51.111		1.35297	43.6582
1.35444	54.2991		9.35533	58.9724		2.35486	41.0636		10.3538	57.0817		3.35239	51.5942		11.3543	49.3694		4.35416	57.9316		12.3533	52.8169		5.35411	42.513		13.3536	53.9323		6.35415	41.7078		14.3539	45.2538		7.35326	48.8475		15.3533	55.3161		8.35308	45.7787		16.3535	51.4719		1.35422	47.9677
1.35548	57.8571		9.35658	52.972		2.35563	39.5247		10.3554	43.6523		3.3542	53.3657		11.3554	52.9959		4.35596	56.9146		12.3551	58.7189		5.3555	44.04		13.3554	42.2923		6.35505	45.9158		14.3549	43.4852		7.355	58.4237		15.3546	63.771		8.35467	45.9039		16.3545	41.6959		1.3561	42.3341
1.35722	63.595		9.35748	43.2675		2.35674	40.831		10.3571	46.0799		3.35559	55.7247		11.3564	36.5215		4.35735	72.3571		12.3567	51.8298		5.35641	49.3306		13.3567	43.1781		6.35637	41.5855		14.356	39.6738		7.35618	53.7743		15.3564	49.2203		8.35634	37.2403		16.356	49.7302		1.35755	44.7706
1.35888	62.754		9.35894	43.861		2.35847	47.1028		10.3582	44.9078		3.35656	67.6063		11.358	42.0865		4.35819	75.4587		12.3576	49.936		5.35772	42.4355		13.3577	52.8229		6.35818	37.1001		14.3576	52.8825		7.35708	43.7179		15.3579	44.1682		8.35752	42.7069		16.3578	49.4678		1.35832	50.2432
1.35986	60.6724		9.36074	51.1528		2.35993	43.5449		10.3592	46.8105		3.35781	64.2034		11.3597	51.2333		4.35937	60.2429		12.3587	48.9996		5.35953	42.1014		13.3589	49.9092		6.35964	39.0893		14.3593	53.5446		7.35854	45.3522		15.3588	51.6986		8.35849	59.1305		16.359	40.9533		1.35943	52.8527
1.36076	57.0339		9.36199	53.3001		2.36097	45.9308		10.3607	43.2347		3.35955	60.5233		11.3609	48.0959		4.36103	57.7109		12.3604	41.9911		5.36092	47.2877		13.3607	39.7872		6.36054	35.6745		14.3604	47.0461		7.36035	42.0269		15.36	53.8727		8.35995	53.4432		16.3599	34.0701		1.3611	46.1723
1.36229	63.607		9.36276	46.3513		2.36209	50.3983		10.3625	37.4132		3.36107	57.4664		11.3619	50.4072		4.36249	48.4657		12.3621	46.8821		5.36175	42.9693		13.3623	39.0774		6.36179	44.3024		14.3613	47.8066		7.3616	46.1186		15.3618	40.485		8.36169	52.7871		16.3614	43.9863		1.36262	45.3283
1.36395	66.8786		9.36408	38.1767		2.36375	50.6458		10.3637	53.0227		3.36205	50.7174		11.3634	53.9949		4.36346	49.0145		12.3631	53.1569		5.36293	46.6435		13.3632	43.7208		6.3636	49.5632		14.3628	44.9794		7.3625	53.0317		15.3633	47.0044		8.36301	50.3356		16.3633	43.1095		1.36367	41.7525
1.36506	57.7914		9.36581	34.1744		2.36542	50.4758		10.3646	55.8052		3.36323	51.8686		11.3652	48.8206		4.36464	50.7204		12.3642	51.1856		5.36467	51.1081		13.3643	43.1661		6.36506	48.2808		14.3646	38.2244		7.36396	63.5354		15.3642	40.8399		8.36391	43.7596		16.3644	45.1882		1.36471	49.3336
1.36604	55.7664		9.36713	40.2882		2.36653	49.8853		10.3661	56.2257		3.36503	63.3415		11.3664	45.3074		4.36631	63.7829		12.3658	43.1602		5.36606	43.8401		13.366	49.0711		6.36589	49.1308		14.3658	39.987		7.36576	52.0982		15.3652	39.3875		8.3653	41.3946		16.3652	45.042		1.36637	53.7146
1.36756	42.6204		9.36804	44.1443		2.3675	41.5974		10.368	52.7543		3.36663	66.9293		11.3673	43.8521		4.36798	57.9614		12.3676	48.7222		5.36703	43.3361		13.3677	48.6298		6.36693	46.4765		14.3667	48.9697		7.36701	53.8458		15.3669	43.8372		8.36717	52.2324		16.3666	44.7647		1.36804	49.2948
1.3693	49.1994		9.36929	49.8555		2.3691	42.5488		10.3691	45.6474		3.36746	59.6494		11.3688	47.6605		4.36902	61.4955		12.3685	50.0344		5.36821	50.5533		13.3687	46.0232		6.3686	37.8457		14.3683	40.9354		7.36778	56.2675		15.3684	51.3496		8.36842	52.5008		16.3682	41.5974		1.36915	36.7333
1.37062	54.2395		9.37102	50.8307		2.37084	50.0165		10.3699	46.566		3.36843	47.6038		11.3706	38.9104		4.36999	58.0181		12.3694	41.1441		5.36988	46.5213		13.3698	40.9115		6.37012	40.324		14.3701	41.833		7.3691	44.1921		15.3695	54.6809		8.36919	49.6139		16.3696	42.9604		1.37012	38.9402
1.37152	54.8151		9.37262	48.0512		2.37202	46.8911		10.3713	55.34		3.3701	58.713		11.3718	36.2203		4.37159	54.7465		12.3709	37.8666		5.37154	47.1803		13.3715	43.9565		6.37117	47.073		14.3713	41.4185		7.37077	45.4238		15.3705	58.7786		8.37044	50.7561		16.3705	47.6545		1.37165	47.8961
1.37291	57.198		9.37359	49.0801		2.37292	47.9498		10.373	52.4352		3.3717	60.9259		11.3727	38.305		4.37332	58.7726		12.3726	42.0299		5.37259	49.1874		13.3732	43.7566		6.37221	56.178		14.3721	41.2604		7.37208	45.889		15.3721	63.097		8.37217	54.8419		16.3718	45.3671		1.37346	48.928
1.37472	61.4358		9.3747	55.7336		2.37452	48.7073		10.3743	52.7722		3.37274	54.2544		11.3739	45.543		4.37451	63.8664		12.3737	45.7488		5.37356	52.2443		13.3741	58.9814		6.37381	57.2576		14.3735	37.4341		7.37306	44.6871		15.3738	52.3845		8.37349	44.9913		16.3735	53.1718		1.37471	45.1553
1.37611	59.1245		9.37637	57.4664		2.37625	53.3836		10.3752	52.5843		3.37378	55.0865		11.3756	42.4534		4.37541	60.9736		12.3747	48.6298		5.37523	41.8688		13.375	53.7862		6.37554	40.8578		14.3752	47.7619		7.37431	44.198		15.375	49.5304		8.37446	42.3639		16.3751	49.1636		1.37561	38.1171
1.37701	59.9059		9.37804	56.7268		2.37743	51.3616		10.3766	56.0587		3.37538	52.1787		11.377	43.4226		4.37701	52.805		12.3762	40.6312		5.37696	49.5871		13.3766	39.4561		6.37665	37.8874		14.3765	46.7897		7.37604	42.4862		15.3759	51.7045		8.37571	48.3136		16.376	48.4896		1.37707	40.1987
1.37833	54.1828		9.37908	52.2085		2.3782	46.0978		10.3783	50.9947		3.37712	58.1106		11.3779	49.4439		4.37874	51.4272		12.3779	43.6463		5.37807	46.4318		13.3782	50.8098		6.37762	45.9486		14.3774	44.7587		7.37764	40.7892		15.3774	54.5616		8.37738	54.7465		16.3772	52.629		1.37887	34.6576
1.38013	48.9071		9.38012	52.9124		2.37959	47.6784		10.3798	43.7924		3.37837	56.3569		11.3791	60.2131		4.37992	54.32		12.3793	48.0154		5.37904	44.7408		13.3794	54.4393		6.37915	51.8835		14.3787	44.4336		7.37861	44.6931		15.3793	67.1142		8.37898	49.9957		16.3789	43.3421		1.38012	42.4653
1.38152	53.9592		9.38179	47.8186		2.38132	46.1425		10.3807	48.7043		3.37927	55		11.3809	46.5242		4.38075	63.8008		12.3802	38.293		5.38064	44.4784		13.3804	48.3643		6.38096	49.3574		14.3804	48.4299		7.37972	42.1492		15.3805	73.1922		8.38002	46.1186		16.3805	43.8401		1.38089	44.9615
1.38229	50.452		9.38352	48.5522		2.38257	46.7419		10.3818	46.2349		3.38073	54.9344		11.3825	50.1		4.38214	61.5044		12.3815	37.8755		5.38238	49.3574		13.3818	49.8913		6.38214	46.9567		14.382	52.4054		7.38139	45.1136		15.3813	52.7483		8.38106	39.0416		16.3815	43.4226		1.38221	42.686
1.38347	54.5795		9.38449	49.2232		2.38354	43.2944		10.3836	47.6098		3.38253	58.3879		11.3834	47.246		4.38388	78.9123		12.3833	49.3038		5.38349	60.4189		13.3836	43.9415		6.38304	48.7013		14.383	46.1872		7.38306	48.0452		15.3829	53.0466		8.3828	36.6378		16.3826	42.2207		1.38394	40.9354
1.38513	52.1012		9.3854	51.3198		2.38486	44.6454		10.3852	55.1044		3.38385	62.6497		11.3845	39.2921		4.38513	78.6588		12.3848	49.7123		5.38432	52.0684		13.385	48.2092		6.38457	49.9062		14.3841	42.5339		7.3841	50.437		15.3847	48.087		8.38446	46.0113		16.3843	37.9202		1.38526	41.4931
1.38659	56.5538		9.38693	58.206		2.3866	50.786		10.3862	45.9844		3.38475	59.9357		11.3863	37.115		4.3861	65.7632		12.3857	46.8493		5.38571	52.0415		13.3859	44.9734		6.38637	48.7908		14.3858	44.881		7.38514	50.5295		15.3859	49.3783		8.38544	48.2808		16.386	41.5855		1.38617	47.8961
1.38763	64.2482		9.38852	52.5455		2.38813	53.9413		10.3873	47.1803		3.38614	63.5056		11.3879	42.8709		4.38742	53.7713		12.3869	48.9697		5.38745	42.2297		13.3872	43.8252		6.38762	56.8043		14.3874	47.5531		7.38681	54.9225		15.3868	49.8167		8.38648	57.9734		16.3869	45.2925		1.38749	47.0581
1.38874	60.6008		9.3897	48.7133		2.38903	49.6855		10.389	52.7573		3.38795	60.0908		11.389	37.5564		4.38916	55.7963		12.3887	50.7591		5.3887	43.8342		13.389	47.9498		6.38839	41.2753		14.3884	42.8411		7.38847	43.7865		15.388	48.8773		8.38814	46.5153		16.3878	45.9427		1.38922	47.6396
1.39041	57.7914		9.39068	52.5545		2.39021	47.8514		10.3907	48.0452		3.3892	64.8953		11.39	45.8115		4.39062	69.0109		12.3902	45.1732		5.38967	43.4644		13.3905	55.4473		6.38971	36.2561		14.3894	39.3995		7.38945	45.0718		15.3897	58.9098		8.38988	40.9264		16.3894	39.984		1.39075	43.8014
1.39208	66.1897		9.39213	47.2489		2.39195	45.6325		10.3916	44.374		3.39003	60.2698		11.3917	40.7266		4.39159	65.6916		12.391	44.034		5.39099	49.3097		13.3914	46.1485		6.39144	40.7654		14.3912	38.4779		7.39035	49.6765		15.3911	50.9918		8.39085	47.7798		16.391	41.8301		1.39172	41.6601
1.39319	61.743		9.39387	35.6209		2.39354	39.0147		10.3925	52.4501		3.39128	54.5526		11.3934	39.8647		4.39277	60.0342		12.3921	42.8769		5.39272	57.9167		13.3926	33.4796		6.39276	45.048		14.3929	37.616		7.39188	55.6919		15.392	47.3742		8.39169	48.4299		16.3921	45.2657		1.39283	40.2196
1.39423	50.6846		9.39519	41.5497		2.39452	42.677		10.3941	57.0638		3.39302	51.3437		11.3943	39.7663		4.39451	69.2078		12.3938	37.9113		5.39418	52.9362		13.3944	44.4277		6.39367	40.4552		14.3938	39.6649		7.39354	55.0805		15.3933	46.1246		8.39321	44.3084		16.3931	43.4614		1.39457	44.2487
1.39576	47.8663		9.39609	56.8013		2.39563	41.8718		10.3957	49.268		3.39441	55.4116		11.3952	42.853		4.39603	62.9151		12.3953	47.0521		5.39516	45.0778		13.3959	45.7518		6.39499	45.385		14.3947	49.432		7.39465	52.3338		15.395	50.9679		8.39488	45.4536		16.3946	44.3143		1.39617	38.2662
1.39749	56.5448		9.39741	40.0794		2.39736	42.5846		10.3968	52.6827		3.39538	54.1232		11.3968	38.2185		4.39701	62.1069		12.3964	43.7656		5.39634	45.8264		13.3967	50.6548		6.39672	48.4598		14.3963	48.7073		7.3957	37.9143		15.3965	59.8582		8.39606	51.6628		16.3964	53.8518		1.39721	57.0638
1.3986	47.9617		9.39922	50.2372		2.39903	43.3988		10.3979	54.317		3.39656	56.5717		11.3984	52.4441		4.39819	67.8657		12.3974	41.6809		5.39814	40.2852		13.3978	44.3292		6.39825	49.4409		14.398	49.93		7.39715	47.5084		15.3975	64.3764		8.39703	56.9892		16.3976	54.7465		1.39832	43.2198
1.39958	51.5316		9.40068	46.9865		2.39993	45.3015		10.3993	51.117		3.3983	52.8438		11.3995	47.5293		4.39992	69.172		12.399	48.9608		5.39967	51.1379		13.3995	40.2435		6.39922	52.1728		14.3991	48.9161		7.39889	45.4148		15.3986	48.9548		8.39849	42.343		16.3986	49.1367		1.39999	44.4157
1.40117	57.4216		9.40158	42.9991		2.4009	47.0014		10.4011	41.5825		3.39989	58.4476		11.4005	43.7894		4.40159	59.378		12.4008	45.2985		5.40057	43.5121		13.401	45.4118		6.40033	56.2824		14.4001	47.41		7.40021	38.3616		15.4004	47.24		8.4003	48.7818		16.3999	54.5109		1.40165	40.6252
1.40291	64.4092		9.40283	56.7834		2.4025	51.2333		10.4023	42.6979		3.40087	55.0507		11.402	46.1425		4.40242	64.117		12.4019	46.8165		5.40175	46.4944		13.402	43.4405		6.40207	56.1273		14.4016	52.304		7.40111	50.8516		15.402	47.067		8.40162	44.2368		16.4017	49.0413		1.40262	45.2746
1.40409	65.8646		9.4047	46.9119		2.4041	59.5689		10.4033	44.6454		3.40198	49.6616		11.4038	42.0716		4.40339	65.6021		12.4028	46.7091		5.40356	50.1448		13.4031	49.3425		6.40367	46.7897		14.4034	50.7144		7.40243	49.5364		15.403	44.8333		8.40252	43.4823		16.4031	50.8516		1.40353	40.3747
1.40486	56.3212		9.40616	42.5697		2.40521	52.7364		10.4046	46.7688		3.40364	44.6305		11.4051	43.3003		4.40499	56.7178		12.4044	43.9743		5.40516	53.5536		13.4047	49.2531		6.40471	48.8833		14.4046	46.6495		7.40424	43.6314		15.404	50.1328		8.40384	45.4566		16.404	47.6366		1.40505	51.3526
1.40624	65.7721		9.40693	43.5151		2.40618	51.0723		10.4064	51.287		3.40531	50.9202		11.406	52.0087		4.40666	48.2659		12.4062	40.0407		5.40599	46.1664		13.4064	43.4554		6.40575	50.27		14.4055	47.1654		7.40569	56.1571		15.4058	56.2645		8.40565	44.9078		16.4053	46.7151		1.40672	46.8642
1.40798	62.8196		9.40804	47.7679		2.40771	48.6059		10.4079	47.9617		3.40635	57.5946		11.4073	53.7951		4.4077	51.8477		12.4074	48.4836		5.40696	49.7929		13.4075	34.0909		6.40749	50.9828		14.4069	40.485		7.4066	50.7412		15.4074	58.9903		8.40703	50.5355		16.4071	48.5134		1.40783	43.9743
1.40923	61.5581		9.40977	53.2136		2.40945	39.647		10.4088	45.2239		3.40732	57.3948		11.4091	47.4905		4.40874	50.8098		12.4083	48.4836		5.40863	43.6493		13.4085	43.9475		6.40915	44.8899		14.4087	38.305		7.40785	38.0485		15.4084	52.4263		8.40794	45.0957		16.4085	45.5192		1.4088	45.4118
1.4102	67.0247		9.41123	49.2232		2.41077	45.1076		10.4101	43.0468		3.40899	47.7261		11.4106	43.7865		4.41027	47.0521		12.4098	50.1328		5.41016	44.9406		13.41	50.5623		6.41006	50.5623		14.4101	47.3563		7.40965	38.9253		15.4093	51.3407		8.40919	44.5917		16.4094	43.5986		1.41033	50.8725
1.41152	64.9192		9.41227	49.3873		2.41167	44.0847		10.4119	47.413		3.41073	49.0204		11.4115	44.1324		4.412	54.8419		12.4116	49.268		5.41127	55.0596		13.4118	51.4331		6.41096	61.8355		14.411	45.1494		7.41111	42.3878		15.4108	50.6667		8.41106	54.5765		16.4105	41.0666		1.41207	49.1815
1.41333	59.2558		9.41338	39.0237		2.41306	44.6752		10.4133	54.2306		3.41177	53.5208		11.4127	43.7656		4.41325	52.0057		12.4128	40.2315		5.41231	44.6006		13.413	46.3781		6.41256	47.2012		14.4124	43.0856		7.41195	38.9163		15.4125	48.8833		8.41252	59.3542		16.4122	49.1308		1.41339	52.7006
1.41479	62.6347		9.41498	47.8842		2.41486	43.354		10.4141	50.6279		3.4126	47.6545		11.4146	40.5447		4.41423	49.9002		12.4136	42.6532		5.41384	46.4765		13.4139	54.6809		6.41422	48.3852		14.4142	47.8245		7.41306	42.1253		15.4136	55.0209		8.41335	56.4315		16.4137	51.0514		1.41429	45.0361
1.41569	59.0798		9.41665	51.1826		2.41618	41.5616		10.4152	46.8463		3.41406	56.6433		11.4161	38.63		4.41569	60.2608		12.4149	49.0204		5.41557	45.7518		13.4155	55.4026		6.41533	51.624		14.4156	41.8778		7.41472	54.0755		15.4147	54.7972		8.41446	45.7846		16.4146	46.9925		1.41561	44.2666
1.41687	65.9004		9.41776	54.9612		2.41709	42.0627		10.417	44.9645		3.4158	67.6063		11.4168	46.4825		4.41742	50.7621		12.4166	49.1785		5.41682	43.9743		13.4173	42.0686		6.41631	45.4625		14.4164	48.8415		7.41625	49.1874		15.4161	46.6704		8.41613	39.9035		16.4158	45.0838		1.41742	48.1705
1.41861	77.1706		9.41873	57.6453		2.41847	46.733		10.4184	50.8933		3.41698	67.1052		11.4179	47.4428		4.41874	47.8156		12.4179	60.0849		5.41772	44.9347		13.4184	40.3777		6.41776	50.4251		14.4176	53.9621		7.41722	39.1132		15.4179	54.5377		8.41766	51.5733		16.4174	39.5993		1.41887	50.6518
1.4202	68.4473		9.42026	52.978		2.42028	55.2744		10.4194	54.824		3.41795	63.1209		11.4196	45.5788		4.41971	52.2175		12.4189	53.822		5.41918	43.1751		13.4192	46.9119		6.41957	45.5192		14.4193	44.538		7.41833	37.3506		15.4192	48.1794		8.4187	47.5084		16.4191	40.4105		1.41978	40.3657
1.42117	53.0973		9.42206	48.8475		2.42167	43.6016		10.4205	47.744		3.41941	58.9814		11.4211	45.4715		4.4211	56.5985		12.4201	52.0564		5.42092	48.9817		13.4206	49.3276		6.42082	40.6043		14.4208	47.231		7.41993	43.0439		15.4201	54.5437		8.41974	37.8218		16.4202	47.8812		1.42103	33.5571
1.42229	57.8451		9.42324	48.3256		2.42243	49.4738		10.4222	54.4214		3.42114	54.6481		11.4221	53.7832		4.42291	65.3725		12.4219	56.4166		5.42224	56.6611		13.4223	35.9966		6.42179	45.3909		14.4218	48.3434		7.42167	43.8819		15.4214	54.0218		8.42134	35.9937		16.4212	49.265		1.4229	45.6594
1.42402	58.7219		9.42415	50.443		2.42368	53.2553		10.4239	56.2645		3.42253	53.1241		11.4232	46.56		4.4243	64.0424		12.4235	52.0087		5.42314	48.9817		13.4236	34.2222		6.42311	49.6288		14.4229	47.6545		7.42278	42.4772		15.4232	46.1276		8.42308	42.8888		16.4228	44.3978		1.42429	42.17
1.42569	50.443		9.42568	53.1808		2.42535	48.3345		10.4249	45.0241		3.4235	51.964		11.4248	43.5031		4.42506	65.4202		12.4244	45.6743		5.4246	40.6699		13.4246	60.6127		6.42492	42.9842		14.4245	46.6405		7.42368	34.4757		15.4247	41.7078		8.42419	52.2026		16.4245	37.2134		1.42505	46.226
1.42659	49.8615		9.42748	46.7509		2.42674	45.8651		10.4259	42.9276		3.42475	56.691		11.4266	43.9893		4.42624	58.3193		12.4255	49.6229		5.4264	43.8073		13.4259	53.1957		6.42631	46.4527		14.4262	43.7775		7.42521	52.9183		15.4256	49.6408		8.42516	49.5751		16.4257	44.5261		1.42624	47.0939
1.42756	53.8041		9.42866	47.2489		2.42778	52.7782		10.4275	41.6481		3.42656	60.9974		11.4277	40.1152		4.42798	54.6481		12.4273	52.0147		5.42772	40.0287		13.4276	49.5543		6.42728	40.4075		14.4273	41.7585		7.42701	48.7282		15.4268	49.1129		8.42669	50.8128		16.4266	44.9347		1.4279	39.0207
1.42916	55.5308		9.42943	40.1421		2.42889	52.3964		10.4293	45.4059		3.42802	51.7194		11.4286	49.0025		4.42944	52.8408		12.4289	49.1696		5.42849	48.8862		13.4291	50.3088		6.42853	42.5667		14.4283	44.3113		7.4282	43.9743		15.4287	44.6603		8.42849	52.2771		16.4282	42.5249		1.42936	40.5208
1.43069	69.7774		9.43081	43.3451		2.43056	47.1505		10.4305	41.7883		3.42892	55.4682		11.4302	47.9617		4.43041	55.2475		12.4299	41.4095		5.42974	57.5797		13.4301	54.2455		6.4304	46.3811		14.4299	43.2974		7.42917	40.5059		15.4302	50.2253		8.42967	51.785		16.43	40.4463		1.4304	38.8805
1.4318	65.3129		9.43248	52.805		2.43222	43.4554		10.4314	51.0514		3.43017	63.3505		11.432	46.2827		4.43159	64.0275		12.431	49.7213		5.4314	48.2957		13.4313	46.2976		6.43179	47.0133		14.4316	48.8415		7.4307	46.5004		15.4309	59.2349		8.43051	54.3588		16.4311	40.5387		1.43151	45.8801
1.43284	48.1705		9.4338	50.2909		2.43327	41.7346		10.433	44.0996		3.43198	66.464		11.4331	38.4839		4.43325	57.4634		12.4327	43.9773		5.43286	42.6532		13.433	46.3155		6.43256	49.4588		14.4328	41.5467		7.4325	49.6229		15.432	59.5391		8.43203	47.8096		16.4319	39.8707		1.43318	49.5215
1.43437	59.5868		9.43477	33.8702		2.43431	43.8312		10.4348	50.3356		3.4335	59.0798		11.4341	42.1969		4.43485	51.7642		12.4344	40.992		5.43384	48.9936		13.4346	40.6073		6.43374	35.6417		14.4337	47.076		7.43361	55.8649		15.4338	51.4361		8.43391	52.3308		16.4333	39.4681		1.43485	42.0507
1.43611	61.9965		9.43609	43.3451		2.4359	50.8754		10.4359	51.3138		3.43434	56.5717		11.4356	34.1148		4.43589	49.8704		12.4353	35.5284		5.43502	48.8236		13.4356	39.7216		6.4354	35.3226		14.4353	45.048		7.43438	56.4643		15.4352	47.4905		8.43509	45.5162		16.4351	38.0336		1.43589	31.1146
1.43736	55.6829		9.43783	43.3958		2.43764	47.5472		10.4366	51.7642		3.43538	58.1672		11.4374	48.0393		4.43701	55.844		12.4362	32.6594		5.43668	40.4701		13.4367	44.9555		6.43686	43.0946		14.4371	41.5139		7.43576	51.8745		15.4362	49.0562		8.43585	50.1895		16.4363	36.1517		1.43693	40.4701
1.43833	64.0185		9.43929	47.7291		2.43882	54.2574		10.438	53.7683		3.43705	57.1145		11.4386	49.8078		4.4386	60.8931		12.4378	40.7147		5.43835	43.4495		13.4384	51.1021		6.43783	47.0103		14.4382	42.6383		7.4375	57.693		15.4373	58.6026		8.43724	52.2026		16.4373	39.99		1.43846	45.3045
1.43965	65.2622		9.44026	42.6114		2.43979	56.0498		10.4398	59.0649		3.43864	54.3737		11.4393	42.6293		4.44034	57.9167		12.4394	46.0471		5.43939	43.7149		13.4401	57.1711		6.43894	41.1948		14.439	36.8913		7.43882	55.6114		15.439	54.1649		8.43891	50.7353		16.4386	48.2271		1.44019	45.3731
1.44145	70.7168		9.44144	35.7819		2.44139	49.3127		10.441	59.5212		3.43969	57.4187		11.4407	45.1643		4.44145	54.2484		12.4405	50.4132		5.44043	44.7915		13.441	49.8615		6.44061	44.8362		14.4404	38.1439		7.43972	48.4896		15.4406	58.5698		8.44023	48.5791		16.4403	53.9025		1.44137	45.7041
1.44284	63.2431		9.44318	53.479		2.44313	47.2102		10.442	47.7858		3.44073	57.2009		11.4424	47.8603		4.44242	59.6494		12.4415	45.4267		5.44203	48.2808		13.442	44.4247		6.44235	51.0096		14.4421	41.5408		7.44104	45.4178		15.4418	52.629		8.4412	57.1562		16.4418	48.2301		1.44235	43.5568
1.44374	51.9521		9.44477	56.0408		2.44424	40.0526		10.4433	49.7302		3.44232	55.2535		11.4437	52.5068		4.44402	68.9066		12.443	42.8321		5.44377	40.7534		13.4435	43.8551		6.44346	54.663		14.4434	46.6256		7.44278	45.6057		15.4427	47.1565		8.44245	60.404		16.4427	40.9443		1.44394	55.4861
1.44506	57.1174		9.44574	45.8711		2.445	51.9491		10.445	43.0498		3.44406	56.0885		11.4447	53.1927		4.44576	62.59		12.4448	44.547		5.44481	44.5052		13.4452	34.4548		6.44436	45.6922		14.4444	56.2287		7.44431	41.7764		15.4443	50.5355		8.44419	58.7518		16.4439	45.5759		1.44568	47.0074
1.44694	60.392		9.44679	51.0991		2.44646	51.7463		10.4465	44.532		3.44524	58.6444		11.446	47.8842		4.44687	63.1209		12.4461	43.4644		5.44578	52.8736		13.4464	38.1022		6.44596	42.2893		14.4457	48.4747		7.44528	42.4802		15.4461	51.5703		8.44571	56.0647		16.4457	45.2418		1.44679	46.9746
1.44833	55.7068		9.44852	57.1473		2.44813	56.5747		10.4475	45.7816		3.44621	57.4574		11.4477	46.1872		4.44763	57.5857		12.447	42.3102		5.44745	52.4352		13.4473	42.3192		6.44769	41.3499		14.4474	43.9743		7.44639	50.9411		15.4472	58.7488		8.44669	46.7628		16.4472	43.7775		1.44762	56.017
1.44909	58.5281		9.45019	55.51		2.44938	48.0959		10.4487	39.9452		3.44767	51.29		11.4492	42.4713		4.44909	62.0293		12.4483	52.295		5.44918	46.1514		13.4488	51.1438		6.44887	43.8759		14.4489	45.9337		7.44813	50.0523		15.4481	50.8307		8.4478	42.8411		16.4482	52.5992		1.44901	49.7451
1.45027	55.1282		9.45116	47.3533		2.45035	41.8778		10.4504	39.9422		3.44941	47.1654		11.4502	36.265		4.45082	62.3305		12.4501	51.5912		5.45022	49.3813		13.4506	44.538		6.44978	54.7077		14.4499	45.0629		7.44972	53.7862		15.4497	36.5961		8.44953	51.0007		16.4493	46.569		1.45075	49.9539
1.45194	42.2774		9.45206	40.2792		2.45167	43.7149		10.452	45.0539		3.45066	56.6761		11.4513	41.7466		4.452	62.5572		12.4516	44.2726		5.45106	58.3104		13.4519	54.2484		6.45137	54.156		14.451	49.0383		7.45077	57.705		15.4515	48.3315		8.45113	56.6015		16.4511	38.1529		1.452	49.9211
1.4534	48.919		9.45366	46.229		2.45347	50.4221		10.453	46.2141		3.45156	53.1897		11.4531	48.5045		4.45298	65.456		12.4525	42.9365		5.45259	59.378		13.4527	57.9227		6.45318	40.8608		14.4528	49.3187		7.45181	48.5015		15.4527	51.63		8.45217	48.3047		16.4527	41.5259		1.4529	44.7617
1.45437	53.8876		9.45526	38.6688		2.45493	55.4116		10.4541	45.6236		3.45309	40.7355		11.4547	46.1723		4.45437	60.9945		12.4538	44.0817		5.45425	50.1299		13.4541	42.5697		6.45429	44.5768		14.4544	44.0161		7.45354	43.3242		15.4535	56.3599		8.45321	49.2203		16.4536	48.6864		1.45422	47.9438
1.45548	65.0504		9.45637	38.642		2.45584	43.0051		10.4558	54.0695		3.45489	47.4488		11.4557	41.1829		4.4561	51.5017		12.4556	36.4142		5.45543	50.9291		13.4559	42.9514		6.45512	41.2425		14.4553	36.7243		7.45521	40.8638		15.4549	55.2088		8.45495	46.1007		16.4546	47.9021		1.45603	46.232
1.45722	69.008		9.45734	46.5153		2.45709	50.9351		10.4574	50.9649		3.45607	52.6857		11.4568	48.5134		4.45749	68.0805		12.457	43.4286		5.45641	51.117		13.4573	47.5621		6.45651	45.7339		14.4564	50.4102		7.45611	50.2014		15.4565	53.1599		8.45662	47.568		16.4562	51.9312		1.45749	51.9491
1.45881	59.9208		9.45887	42.6979		2.45882	47.1923		10.4583	51.4212		3.45684	53.813		11.4585	42.0776		4.45846	63.4698		12.4578	48.0303		5.45779	51.3437		13.4582	41.8539		6.45818	44.6722		14.4582	59.1186		7.45701	41.9881		15.4579	56.2615		8.45752	50.4609		16.4577	47.1624		1.45839	43.0707
1.45986	63.2849		9.46061	48.0035		2.46035	49.6765		10.4593	43.017		3.45823	62.9747		11.4602	43.0319		4.45971	64.9371		12.459	46.8374		5.4596	58.2776		13.4596	39.3339		6.4595	45.0211		14.4598	53.0704		7.45854	48.1168		15.4588	54.1232		8.45842	49.8108		16.4588	48.1049		1.45957	37.2403
1.4609	62.3395		9.46193	50.3267		2.46132	42.6084		10.4609	41.5259		3.45989	55.3847		11.4611	45.0927		4.46145	60.5471		12.4606	57.6215		5.46099	54.1202		13.4614	48.0691		6.4604	51.8477		14.4607	54.4125		7.46021	47.067		15.4601	46.3214		8.46002	49.1636		16.4598	45.3403		1.46137	39.0267
1.46256	58.7309		9.46283	47.231		2.4625	50.3356		10.4625	41.7823		3.46121	44.4515		11.462	41.6123		4.46298	65.6946		12.4621	55.1551		5.46189	50.3923		13.4627	47.0968		6.46172	54.4781		14.4617	49.4827		7.46132	43.8222		15.4618	43.6135		8.46169	47.9647		16.4614	46.7479		1.46297	45.8323
1.4643	55.501		9.46422	47.7559		2.46431	52.5992		10.4636	39.1996		3.46218	45.0718		11.4636	43.7208		4.46388	61.8355		12.4632	51.8208		5.46314	49.4916		13.4636	45.3432		6.46346	49.6527		14.4633	49.6825		7.46229	42.9902		15.4633	61.4508		8.4628	37.9501		16.4631	49.5364		1.46394	47.4637
1.46541	61.8832		9.46595	42.5428		2.46584	48.7968		10.4646	44.9168		3.46343	46.4855		11.4652	46.9268		4.46506	55.9543		12.4642	51.5196		5.46488	44.025		13.4647	43.8551		6.46499	47.9826		14.4649	52.2831		7.46382	41.2694		15.4643	51.5524		8.46377	42.0627		16.4644	43.2854		1.46499	40.3568
1.46638	62.7212		9.46734	44.4903		2.46674	39.3398		10.4662	67.1589		3.46517	52.9034		11.4663	44.2308		4.46687	61.913		12.4659	48.7312		5.4664	43.3033		13.4664	45.9993		6.46589	50.944		14.466	46.7598		7.46563	52.2891		15.4655	52.4501		8.46523	54.0457		16.4653	39.3607		1.46672	32.9785
1.46798	69.6372		9.46824	48.2271		2.46771	41.7197		10.4679	56.9385		3.46677	65.3516		11.4672	40.6013		4.46846	71.1165		12.4676	52.0117		5.46731	38.8626		13.4678	62.2023		6.46707	54.2276		14.4669	45.4715		7.46688	55.8977		15.4672	49.092		8.46703	54.2186		16.4667	43.4793		1.46839	35.427
1.46972	57.2278		9.46956	54.6272		2.46931	47.9289		10.4691	44.0161		3.46774	66.2493		11.4688	41.3767		4.4693	72.1961		12.4687	51.6061		5.46856	44.9406		13.4689	58.3193		6.46881	48.9757		14.4685	49.1636		7.46778	54.2604		15.4688	57.9227		8.46828	51.791		16.4685	46.2111		1.46929	43.0558
1.47083	49.1099		9.47137	45.4655		2.4709	48.1556		10.47	45.9814		3.46885	48.3733		11.4705	47.8752		4.47027	56.014		12.4697	49.4022		5.47036	50.616		13.47	48.4031		6.4704	56.187		14.4703	45.2627		7.46917	50.5414		15.4697	62.5542		8.46919	39.8259		16.4698	49.7601		1.47026	45.7071
1.47159	62.9509		9.47276	53.3895		2.47202	44.4754		10.4714	42.5846		3.47052	50.2163		11.4718	45.3403		4.47194	55.2595		12.4712	45.9337		5.47189	56.6373		13.4716	49.1338		6.47137	59.5242		14.4715	62.5751		7.47097	49.7451		15.4708	57.6095		8.47058	39.1907		16.4707	43.3302		1.47186	42.7248
1.47305	60.6604		9.47359	51.3109		2.47306	41.8122		10.4732	49.3783		3.47219	57.5558		11.4727	41.2157		4.47346	56.2973		12.473	44.3024		5.47272	45.5371		13.4733	38.8746		6.47249	46.7091		14.4724	54.5586		7.47236	58.9665		15.4726	50.9619		8.47238	41.9374		16.4721	39.0595		1.47346	40.9055
1.47479	46.6316		9.4747	46.5391		2.47459	50.5802		10.4746	39.6202		3.47323	43.8282		11.4741	39.5188		4.47457	53.8578		12.4742	50.6458		5.47377	54.654		13.4744	42.0358		6.47422	44.6961		14.4738	52.2712		7.47327	49.9479		15.4743	52.3606		8.47377	46.733		16.4739	47.0282		1.47457	50.0493
1.47597	54.4423		9.47644	47.0312		2.47632	51.2631		10.4755	50.3237		3.47427	38.5048		11.4759	41.9702		4.47562	61.9011		12.4751	51.8387		5.47543	51.4659		13.4755	45.4417		6.47589	51.0574		14.4756	40.8668		7.47451	33.6436		15.4752	49.6139		8.47467	45.9278		16.4753	41.839		1.47554	49.8227
1.47694	58.2269		9.4779	47.407		2.47757	53.4134		10.4768	46.3304		3.476	46.8493		11.4773	38.3109		4.47714	63.1417		12.4767	46.2976		5.47696	50.5355		13.477	51.5345		6.47679	36.7392		14.4769	60.2489		7.47632	41.9553		15.4761	55.8261		8.47592	52.8676		16.476	47.9229		1.47707	46.3572
1.47826	50.4221		9.47887	53.4581		2.47847	52.9571		10.4787	50.5533		3.47767	43.7268		11.4782	48.5492		4.47888	54.7704		12.4785	35.1019		5.478	55.4951		13.4787	45.2985		6.47769	39.5635		14.4778	51.5614		7.47778	44.4336		15.4777	52.8975		8.47773	51.3765		16.4773	55.3519		1.4788	43.1303
1.48006	52.4143		9.47998	47.0879		2.47993	58.7249		10.48	52.6141		3.47857	54.4125		11.4795	49.5394		4.48013	63.0135		12.4796	41.8599		5.47904	48.2599		13.4799	48.3792		6.47929	40.157		14.4792	42.4593		7.47854	45.1225		15.4793	56.4434		8.47919	47.1923		16.4789	56.9236		1.48012	38.2155
1.48145	63.7322		9.48165	38.3885		2.48174	44.9883		10.4808	55.6263		3.47948	54.4274		11.4813	47.8126		4.48103	74.3612		12.4804	38.296		5.48064	51.3526		13.4809	48.0929		6.48089	40.8578		14.4811	41.8032		7.47972	38.3288		15.4804	56.345		8.47995	52.6529		16.4804	48.1615		1.48103	32.3731
1.48242	74.6237		9.48331	54.7525		2.48306	42.7635		10.482	51.8417		3.48107	54.6928		11.4827	45.4267		4.48249	60.9974		12.4818	39.2742		5.48238	45.9606		13.4824	46.2141		6.482	51.8328		14.4825	47.4189		7.48139	45.1792		15.4814	47.8365		8.48106	51.8835		16.4814	40.0675		1.48242	36.617
1.48361	71.707		9.48436	53.7832		2.48389	42.9305		10.4837	52.307		3.48267	43.2646		11.4836	44.2875		4.4843	58.4207		12.4835	46.1514		5.48349	39.3935		13.4841	48.6685		6.48297	49.936		14.4833	46.9835		7.48285	47.7261		15.4829	61.1973		8.4828	54.493		16.4826	38.6748		1.48422	47.1565
1.48541	64.4897		9.4854	50.9172		2.48535	45.5729		10.4851	54.9075		3.48385	42.4534		11.4847	33.2052		4.48562	67.2275		12.4848	40.2584		5.48446	42.2625		13.4853	44.2487		6.4845	47.7887		14.4844	36.1308		7.48382	50.1627		15.4847	57.6155		8.48426	53.3448		16.4842	42.1611		1.48554	51.7493
1.48694	55.9722		9.48693	44.8661		2.48722	49.4052		10.4861	60.5561		3.48482	53.2076		11.4864	39.7335		4.48652	55.1103		12.4857	38.5525		5.48599	37.786		13.4861	44.6066		6.48631	52.5247		14.4862	45.0629		7.485	48.2659		15.4859	50.0195		8.48523	50.95		16.4859	42.4563		1.48644	58.9307
1.48791	49.9569		9.48866	49.93		2.48847	53.1241		10.4872	54.5765		3.48628	59.4168		11.4879	39.2921		4.48798	58.3044		12.487	51.3109		5.48779	37.7502		13.4875	49.2083		6.48755	42.85		14.4876	53.4701		7.48667	42.9574		15.4869	41.7674		8.48634	55.9007		16.4869	41.7943		1.48783	42.2148
1.48902	59.897		9.48984	44.6871		2.48924	41.165		10.4889	56.0796		3.48809	54.6332		11.4888	38.3527		4.48978	60.3682		12.4888	46.3781		5.48904	45.5997		13.4892	40.16		6.48846	46.1962		14.4886	44.8064		7.48826	46.8463		15.4883	57.9972		8.48801	56.4971		16.4879	42.9633		1.48964	50.1179
1.49083	66.4312		9.49074	45.6355		2.49049	45.8651		10.4905	48.2033		3.48941	51.7105		11.49	53.2195		4.49103	58.6444		12.4903	58.6891		5.48995	42.1521		13.4905	46.2499		6.48985	49.3545		14.4898	33.0203		7.48938	51.3884		15.4901	43.4465		8.48967	55.4265		16.4896	49.7422		1.49103	46.0888
1.49242	76.1775		9.49234	45.9427		2.49222	40.2912		10.4916	46.1813		3.49031	52.5664		11.4916	54.5914		4.49187	52.6231		12.4912	43.4584		5.49141	52.6738		13.4914	52.2652		6.49165	38.0932		14.4915	35.4151		7.49035	44.8869		15.4914	46.9775		8.49078	53.7832		16.4913	42.5816		1.49179	52.635
1.49326	61.7102		9.49415	47.6337		2.49354	45.1583		10.4926	54.3648		3.49163	51.9222		11.4933	47.3324		4.49312	64.111		12.4924	44.538		5.49321	50.2969		13.4927	54.1828		6.49304	44.3263		14.4931	40.8906		7.49195	40.5656		15.4923	47.6128		8.49176	48.3077		16.4924	41.0875		1.49297	46.6435
1.4943	61.1376		9.49526	50.8963		2.49452	51.6479		10.4943	46.3781		3.49343	51.5256		11.4943	46.4169		4.49485	66.6698		12.4942	52.0385		5.49446	48.0571		13.4946	43.2079		6.49394	47.9677		14.4942	46.6555		7.49368	37.2104		15.4937	41.8599		8.49328	49.4171		16.4933	39.1281		1.49471	44.0787
1.4959	62.1993		9.49609	39.7037		2.49577	37.1806		10.4959	42.0507		3.49489	54.7763		11.4954	46.5541		4.49624	56.2884		12.4958	53.6102		5.49529	49.6706		13.496	44.7319		6.49526	39.1818		14.4952	40.9354		7.49486	38.1111		15.4955	48.9608		8.49509	45.6802		16.495	39.9035		1.4961	50.2611
1.49749	66.3776		9.49748	50.3744		2.49743	40.5298		10.4971	44.9347		3.4958	59.5182		11.497	43.6045		4.49721	54.6898		12.4967	53.5088		5.49654	54.3469		13.497	46.0322		6.49714	42.8411		14.4968	42.1104		7.49577	33.5064		15.4969	43.3749		8.49627	47.9349		16.4968	41.6452		1.49714	53.4104
1.49854	69.0467		9.49915	54.3618		2.49903	41.4424		10.498	47.5382		3.49705	52.1608		11.4987	50.0285		4.49846	53.2046		12.4978	44.2189		5.49828	51.0902		13.4982	41.8092		6.49853	49.5304		14.4985	36.0473		7.49736	34.243		15.4977	48.5522		8.49717	53.1808		16.4978	42.8769		1.49825	42.1343
1.49958	63.3773					2.50007	44.9943		10.4996	45.886		3.49885	48.6387		11.4999	44.4873					12.4995	40.4254		5.49967	48.7729		13.4999	39.5516		6.49929	45.9427		14.4996	42.6979		7.49917	41.6213		15.4989	51.958		8.4987	52.7245		16.4986	45.3373		1.49992	41.0069
