# Supplementary material for: Binding and sequestration of poison frog alkaloids by a plasma globulin
Source: eLife journal article supplement (doi:10.7554/elife.85096), 2023-12-14
Supplement: fig5-data1 [file OsABG_mut3_analysis_CapillaryShapeRawData_outliersexcluded.xlsx]

## Sheet: RawData
NanoTemper Technologies	NanoTemper Technologies
MO.Affinity Analysis v3.0.5	MO.Affinity Analysis v3.0.5
Origin of exported data	Origin of exported data
Project Title:	OsABG_mut3
Comment:
Project File Path:	C:\Users\nanotemper\Desktop\Aurora_MST\20230125_OsABGmut3_PTX\OsABG_mut3_analysis.nta3
Analysis-Set Name:	Analysis-Set #2
Exported from:	Capillary Shape (Raw Data Inspection)
Exported on:	2023-03-11 17:56:50
Sample Information	Sample Information		Sample Information	Sample Information		Sample Information	Sample Information		Sample Information	Sample Information		Sample Information	Sample Information		Sample Information	Sample Information		Sample Information	Sample Information		Sample Information	Sample Information		Sample Information	Sample Information		Sample Information	Sample Information		Sample Information	Sample Information		Sample Information	Sample Information		Sample Information	Sample Information		Sample Information	Sample Information		Sample Information	Sample Information		Sample Information	Sample Information		Sample Information	Sample Information
Merge-Set Name:	Experiment 7 (#07)		Merge-Set Name:	Experiment 7 (#07)		Merge-Set Name:	Experiment 7 (#07)		Merge-Set Name:	Experiment 7 (#07)		Merge-Set Name:	Experiment 7 (#07)		Merge-Set Name:	Experiment 7 (#07)		Merge-Set Name:	Experiment 7 (#07)		Merge-Set Name:	Experiment 7 (#07)		Merge-Set Name:	Experiment 7 (#07)		Merge-Set Name:	Experiment 7 (#07)		Merge-Set Name:	Experiment 7 (#07)		Merge-Set Name:	Experiment 7 (#07)		Merge-Set Name:	Experiment 7 (#07)		Merge-Set Name:	Experiment 7 (#07)		Merge-Set Name:	Experiment 7 (#07)		Merge-Set Name:	Experiment 7 (#07)		Merge-Set Name:	OsABGm3+PTX (#08)
Run Name:	Experiment 7 (#07)		Run Name:	Experiment 7 (#07)		Run Name:	Experiment 7 (#07)		Run Name:	Experiment 7 (#07)		Run Name:	Experiment 7 (#07)		Run Name:	Experiment 7 (#07)		Run Name:	Experiment 7 (#07)		Run Name:	Experiment 7 (#07)		Run Name:	Experiment 7 (#07)		Run Name:	Experiment 7 (#07)		Run Name:	Experiment 7 (#07)		Run Name:	Experiment 7 (#07)		Run Name:	Experiment 7 (#07)		Run Name:	Experiment 7 (#07)		Run Name:	Experiment 7 (#07)		Run Name:	Experiment 7 (#07)		Run Name:	OsABGm3+PTX (#08)
Date of Measurement:	2023-03-11 16:53:48		Date of Measurement:	2023-03-11 16:54:14		Date of Measurement:	2023-03-11 16:54:41		Date of Measurement:	2023-03-11 16:55:08		Date of Measurement:	2023-03-11 16:55:35		Date of Measurement:	2023-03-11 16:56:01		Date of Measurement:	2023-03-11 16:56:28		Date of Measurement:	2023-03-11 16:56:54		Date of Measurement:	2023-03-11 16:57:21		Date of Measurement:	2023-03-11 16:57:48		Date of Measurement:	2023-03-11 16:58:15		Date of Measurement:	2023-03-11 16:58:41		Date of Measurement:	2023-03-11 16:59:08		Date of Measurement:	2023-03-11 16:59:34		Date of Measurement:	2023-03-11 17:00:01		Date of Measurement:	2023-03-11 17:00:28		Date of Measurement:	2023-03-11 17:11:20
Capillary Type:	Monolith Premium Capillary		Capillary Type:	Monolith Premium Capillary		Capillary Type:	Monolith Premium Capillary		Capillary Type:	Monolith Premium Capillary		Capillary Type:	Monolith Premium Capillary		Capillary Type:	Monolith Premium Capillary		Capillary Type:	Monolith Premium Capillary		Capillary Type:	Monolith Premium Capillary		Capillary Type:	Monolith Premium Capillary		Capillary Type:	Monolith Premium Capillary		Capillary Type:	Monolith Premium Capillary		Capillary Type:	Monolith Premium Capillary		Capillary Type:	Monolith Premium Capillary		Capillary Type:	Monolith Premium Capillary		Capillary Type:	Monolith Premium Capillary		Capillary Type:	Monolith Premium Capillary		Capillary Type:	Monolith Premium Capillary
Capillary Position:	1		Capillary Position:	9		Capillary Position:	2		Capillary Position:	10		Capillary Position:	3		Capillary Position:	11		Capillary Position:	4		Capillary Position:	12		Capillary Position:	5		Capillary Position:	13		Capillary Position:	6		Capillary Position:	14		Capillary Position:	7		Capillary Position:	15		Capillary Position:	8		Capillary Position:	16		Capillary Position:	1
Ligand:	MyLigand		Ligand:	MyLigand		Ligand:	MyLigand		Ligand:	MyLigand		Ligand:	MyLigand		Ligand:	MyLigand		Ligand:	MyLigand		Ligand:	MyLigand		Ligand:	MyLigand		Ligand:	MyLigand		Ligand:	MyLigand		Ligand:	MyLigand		Ligand:	MyLigand		Ligand:	MyLigand		Ligand:	MyLigand		Ligand:	MyLigand		Ligand:	PTX
Ligand Concentration:	0.005		Ligand Concentration:	1.95313e-05		Ligand Concentration:	0.0025		Ligand Concentration:	9.76563e-06		Ligand Concentration:	0.00125		Ligand Concentration:	4.88281e-06		Ligand Concentration:	0.000625		Ligand Concentration:	2.44141e-06		Ligand Concentration:	0.0003125		Ligand Concentration:	1.2207e-06		Ligand Concentration:	0.00015625		Ligand Concentration:	6.10352e-07		Ligand Concentration:	7.8125e-05		Ligand Concentration:	3.05176e-07		Ligand Concentration:	3.90625e-05		Ligand Concentration:	1.52588e-07		Ligand Concentration:	0.005
Target:	OsABGm3		Target:	OsABGm3		Target:	OsABGm3		Target:	OsABGm3		Target:	OsABGm3		Target:	OsABGm3		Target:	OsABGm3		Target:	OsABGm3		Target:	OsABGm3		Target:	OsABGm3		Target:	OsABGm3		Target:	OsABGm3		Target:	OsABGm3		Target:	OsABGm3		Target:	OsABGm3		Target:	OsABGm3		Target:	OsABGm3
TargetConcentration:	5e-09		TargetConcentration:	5e-09		TargetConcentration:	5e-09		TargetConcentration:	5e-09		TargetConcentration:	5e-09		TargetConcentration:	5e-09		TargetConcentration:	5e-09		TargetConcentration:	5e-09		TargetConcentration:	5e-09		TargetConcentration:	5e-09		TargetConcentration:	5e-09		TargetConcentration:	5e-09		TargetConcentration:	5e-09		TargetConcentration:	5e-09		TargetConcentration:	5e-09		TargetConcentration:	5e-09		TargetConcentration:	5e-09
Measurement Settings	Measurement Settings		Measurement Settings	Measurement Settings		Measurement Settings	Measurement Settings		Measurement Settings	Measurement Settings		Measurement Settings	Measurement Settings		Measurement Settings	Measurement Settings		Measurement Settings	Measurement Settings		Measurement Settings	Measurement Settings		Measurement Settings	Measurement Settings		Measurement Settings	Measurement Settings		Measurement Settings	Measurement Settings		Measurement Settings	Measurement Settings		Measurement Settings	Measurement Settings		Measurement Settings	Measurement Settings		Measurement Settings	Measurement Settings		Measurement Settings	Measurement Settings		Measurement Settings	Measurement Settings
MST-Power:	Medium		MST-Power:	Medium		MST-Power:	Medium		MST-Power:	Medium		MST-Power:	Medium		MST-Power:	Medium		MST-Power:	Medium		MST-Power:	Medium		MST-Power:	Medium		MST-Power:	Medium		MST-Power:	Medium		MST-Power:	Medium		MST-Power:	Medium		MST-Power:	Medium		MST-Power:	Medium		MST-Power:	Medium		MST-Power:	Medium
Excitation-Power:	20		Excitation-Power:	20		Excitation-Power:	20		Excitation-Power:	20		Excitation-Power:	20		Excitation-Power:	20		Excitation-Power:	20		Excitation-Power:	20		Excitation-Power:	20		Excitation-Power:	20		Excitation-Power:	20		Excitation-Power:	20		Excitation-Power:	20		Excitation-Power:	20		Excitation-Power:	20		Excitation-Power:	20		Excitation-Power:	15
Excitation type:	Pico - RED		Excitation type:	Pico - RED		Excitation type:	Pico - RED		Excitation type:	Pico - RED		Excitation type:	Pico - RED		Excitation type:	Pico - RED		Excitation type:	Pico - RED		Excitation type:	Pico - RED		Excitation type:	Pico - RED		Excitation type:	Pico - RED		Excitation type:	Pico - RED		Excitation type:	Pico - RED		Excitation type:	Pico - RED		Excitation type:	Pico - RED		Excitation type:	Pico - RED		Excitation type:	Pico - RED		Excitation type:	Pico - RED
Thermostat Setpoint:	25		Thermostat Setpoint:	25		Thermostat Setpoint:	25		Thermostat Setpoint:	25		Thermostat Setpoint:	25		Thermostat Setpoint:	25		Thermostat Setpoint:	25		Thermostat Setpoint:	25		Thermostat Setpoint:	25		Thermostat Setpoint:	25		Thermostat Setpoint:	25		Thermostat Setpoint:	25		Thermostat Setpoint:	25		Thermostat Setpoint:	25		Thermostat Setpoint:	25		Thermostat Setpoint:	25		Thermostat Setpoint:	25
Included	Included		Included	Included		Included	Included		Included	Included		Included	Included		Included	Included		Included	Included		Included	Included		Included	Included		Included	Included		Included	Included		Included	Included		Included	Included		Outlier	Outlier		Included	Included		Outlier	Outlier		Included	Included
Position [mm]	Relative Fluorescence [-]		Position [mm]	Relative Fluorescence [-]		Position [mm]	Relative Fluorescence [-]		Position [mm]	Relative Fluorescence [-]		Position [mm]	Relative Fluorescence [-]		Position [mm]	Relative Fluorescence [-]		Position [mm]	Relative Fluorescence [-]		Position [mm]	Relative Fluorescence [-]		Position [mm]	Relative Fluorescence [-]		Position [mm]	Relative Fluorescence [-]		Position [mm]	Relative Fluorescence [-]		Position [mm]	Relative Fluorescence [-]		Position [mm]	Relative Fluorescence [-]		Position [mm]	Relative Fluorescence [-]		Position [mm]	Relative Fluorescence [-]		Position [mm]	Relative Fluorescence [-]		Position [mm]	Relative Fluorescence [-]
-2.24628	0.0034248		-2.24509	0.000947739		-2.24562	0.00144021		-2.24514	0.00171031		-2.24861	0.000745745		-2.2474	0.00179097		-2.24192	0.00174691		-2.24535	0.000991996		-2.24649	0.00131491		-2.24358	0.00124154		-2.2485	0.00089588		-2.24723	0.000792537		-2.24937	0.000666879		-2.24712	0.00436129		-2.24897	0.000756165		-2.25006	0.00135933		-2.24413	0.00379178
-2.23815	0.00374088		-2.23946	0.00114443		-2.23843	0.00121861		-2.24014	0.00100723		-2.24486	0.000820146		-2.24083	0.0017237		-2.23723	0.00102867		-2.24097	0.00146156		-2.24118	0.00128507		-2.23889	0.00131132		-2.24069	0.000625935		-2.24036	0.000821929		-2.24593	0.000543299		-2.24024	0.00421085		-2.24335	0.000918465		-2.24225	0.00189423		-2.23913	0.00392292
-2.23253	0.003419		-2.23165	0.00140208		-2.23062	0.00112265		-2.2367	0.00105017		-2.24048	0.000825556		-2.2324	0.00095796		-2.23254	0.000902638		-2.23722	0.000929156		-2.23368	0.00143238		-2.2342	0.00126046		-2.23381	0.000600206		-2.23192	0.0011517		-2.24	0.00130138		-2.23556	0.00109809		-2.23991	0		-2.23631	0.00190451		-2.23444	0.00307865
-2.22846	0.0039008		-2.22446	0.000957603		-2.2253	0.00140764		-2.23045	0.000959095		-2.23298	0.000712893		-2.22709	0.000890278		-2.22535	0.00135873		-2.23035	0.00138095		-2.22618	0.00188336		-2.2267	0.00133906		-2.22944	0.00131957		-2.22691	0.000500912		-2.23218	0.001178		-2.23055	0		-2.23397	0.000597568		-2.23225	0.00230251		-2.22757	0.00319674
-2.22221	0.00354615		-2.22009	0.00124623		-2.22124	0.00182098		-2.22264	0.000762836		-2.22579	0.00113263		-2.22365	0.000678278		-2.21754	0.0008249		-2.22285	0.00134411		-2.22149	0.00115898		-2.21889	0.00159549		-2.22444	0.0013725		-2.22348	0.000343321		-2.22624	0.000985562		-2.22337	0.00217165		-2.22616	0.000672032		-2.22631	0.00200303		-2.21975	0.00339242
-2.21409	0.00326984		-2.21508	0.000599932		-2.21405	0.00156931		-2.2167	0.000464092		-2.22111	0.00108683		-2.21771	0.0012568		-2.21254	0.00124226		-2.21754	0.00108842		-2.2168	0.000936007		-2.21451	0.000975451		-2.21694	0.000535672		-2.21723	0.000980561		-2.22187	0.000907274		-2.21587	0.00243984		-2.22022	0.000828984		-2.2185	0.00205259		-2.21444	0.00288366
-2.20815	0.0039636		-2.20727	0.000529897		-2.20593	0.00147374		-2.21232	0.000400608		-2.21642	0.000983633		-2.2099	0.0013399		-2.20816	0.000833422		-2.21316	0.00121388		-2.2093	0.000843121		-2.21076	0.000728068		-2.20944	0.000668536		-2.20942	0.00156506		-2.21625	0.0012649		-2.21056	0.00081437		-2.21616	0.00108529		-2.21162	0.00152524		-2.21038	0.00398471
-2.20409	0.00289846		-2.20009	0.000561068		-2.20093	0.00169437		-2.20639	0.000993119		-2.20923	0.00141187		-2.20396	0.000984617		-2.20098	0.00077867		-2.2066	0.000714419		-2.2018	0.0015032		-2.20389	0.00102947		-2.20444	0.00127317		-2.20348	0.00149669		-2.20843	0.00106672		-2.20618	0.00286174		-2.21054	0.000757605		-2.20725	0.00123875		-2.2035	0.00463033
-2.19784	0.00329407		-2.1954	0.000462033		-2.19749	0.00149474		-2.19857	0.00120328		-2.20142	0.000878507		-2.19959	0.000728466		-2.19285	0.000896439		-2.19879	0.00102905		-2.19711	0.0012464		-2.19639	0.00149124		-2.20007	0.00138832		-2.19942	0.000898431		-2.20156	0.000570556		-2.1993	0.00324276		-2.20272	0.000262477		-2.20194	0.00132155		-2.19538	0.00407191
-2.18971	0.00294625		-2.19071	0.000776104		-2.19124	0.00134906		-2.19201	0.00117527		-2.19611	0.0016144		-2.19396	0.000792608		-2.18816	0.000539		-2.19285	0.00115191		-2.19274	0.00171461		-2.19139	0.000879188		-2.19319	0.00128013		-2.19348	0.00143165		-2.19718	4.9186e-05		-2.19149	0.00317408		-2.19554	0.000913117		-2.19413	0.00136446		-2.19007	0.00335397
-2.18346	0.00308415		-2.18321	0.0011758		-2.18343	0.00160439		-2.18764	0.00154787		-2.19173	0.0016602		-2.18615	0.000901941		-2.18473	0.00122857		-2.18879	0.00179222		-2.18524	0.00104045		-2.18701	0.000972088		-2.18506	0.000651243		-2.18567	0.000790661		-2.19187	0.000433861		-2.18618	0.00332943		-2.19116	0.000727161		-2.18694	0.00231188		-2.18663	0.0030569
-2.18003	0.00277609		-2.1754	0.00104697		-2.1778	0.00118296		-2.18233	0.00121158		-2.18517	0.00126114		-2.17927	0.000726384		-2.17816	0.00198503		-2.18285	0.00118225		-2.17743	0.000976356		-2.18014	0.00122346		-2.17975	0.000309382		-2.17879	0.000738548		-2.18437	0.000538381		-2.18212	0.00118967		-2.18647	0.000396801		-2.18256	0.00174736		-2.18038	0.00318942
-2.17471	0.00301503		-2.17133	0.00122176		-2.17343	0.00119799		-2.17451	0.000793956		-2.17736	0.00104045		-2.1749	0.000408174		-2.17035	0.0016609		-2.17472	0.000399355		-2.17274	0.00180834		-2.17233	0.00120875		-2.17538	0.000614969		-2.17473	0.00164323		-2.17687	0.0014059		-2.17524	0.00142106		-2.17866	0.000881644		-2.17787	0.00229315		-2.17257	0.00379475
-2.1669	0.00379328		-2.16727	0.00111543		-2.16749	0.00151517		-2.16732	0.00107922		-2.17142	0.000471139		-2.1699	0.000625798		-2.16473	0.00115135		-2.16816	0.000894487		-2.16899	0.00208364		-2.16639	0.00121148		-2.1685	0.000278803		-2.16942	0.00128469		-2.1725	0.00120997		-2.16712	0.00222398		-2.17116	0.00103304		-2.16975	0.00142823		-2.16663	0.00381558
-2.16034	0.00444369		-2.1604	0.00107341		-2.15968	0.00240041		-2.16295	0.00155949		-2.16736	0.000406594		-2.16209	0.001277		-2.16035	0.000163999		-2.1641	0.000627961		-2.16242	0.00195586		-2.16233	0.00121338		-2.16038	0.000573844		-2.16161	0.000967428		-2.16781	0.000945598		-2.16181	0.00419776		-2.16678	0.00103057		-2.16225	0.00127471		-2.16257	0.00270903
-2.15596	0.00383714		-2.1529	0.00115054		-2.15312	0.00220791		-2.15826	0.00119871		-2.16111	0.000324464		-2.1549	0.00111061		-2.15441	0.00081741		-2.15847	0.000639878		-2.15461	0.00151518		-2.15608	0.00132834		-2.15506	0.0011983		-2.15442	0.00128824		-2.16	0.0014104		-2.15837	0.00329672		-2.1621	0.00104209		-2.15818	0.00193956		-2.15663	0.0030196
-2.15096	0.00273735		-2.1479	0.0012482		-2.14874	0.00178128		-2.15045	0.000491684		-2.15267	0.000489691		-2.15021	0.00152399		-2.1466	0.00178281		-2.15004	0.000851149		-2.1493	0.00220888		-2.14795	0.000851024		-2.15163	0.000887234		-2.14973	0.000627651		-2.15218	0.00142864		-2.15212	0.00152245		-2.15428	0.00100342		-2.15412	0.00170384		-2.14882	0.00330636
-2.14346	0.00354444		-2.14321	0.000824044		-2.14343	0.00079198		-2.14295	0.0012149		-2.14704	0.000466888		-2.14552	0.00209294		-2.14004	0.00168131		-2.14347	0.00129037		-2.14492	0.00190942		-2.1417	0.000897263		-2.14538	0.00036548		-2.14504	0.00100287		-2.14812	0.000969781		-2.1443	0.00157559		-2.14647	7.81672e-05		-2.14694	0.00141947		-2.14225	0.00354369
-2.13596	0.00309917		-2.13665	0.000984631		-2.13562	0.00114288		-2.13889	0.000915528		-2.14361	0.000375095		-2.13771	0.00128117		-2.13566	0.00137087		-2.13972	0.000632511		-2.13867	0.00176442		-2.13764	0.000982807		-2.13757	0.00055866		-2.13723	0.00102434		-2.14406	0.00116284		-2.13837	0.00258783		-2.14241	0.000581317		-2.13944	0.00189423		-2.13788	0.00465939
-2.13128	0.00342429		-2.12883	0.00147685		-2.12843	0.00148935		-2.13451	0.000513468		-2.13767	0.000804492		-2.13021	0.0014965		-2.13035	0.00117976		-2.13472	0.000394588		-2.13055	0.00157444		-2.1317	0.00145445		-2.13163	0.000645338		-2.12973	0.00121424		-2.13718	0.000649458		-2.134	0.0043433		-2.13835	0.00158721		-2.13443	0.00216229		-2.13257	0.00398036
-2.12659	0.00352157		-2.1229	0.00137643		-2.12405	0.00108199		-2.12733	0.00126365		-2.12986	0.00106113		-2.12584	0.00144694		-2.12223	0.000944476		-2.12722	0.000185485		-2.1243	0.00126994		-2.12358	0.00127412		-2.12756	0.00105764		-2.12566	0.00161905		-2.12968	0.000841283		-2.12837	0.00338503		-2.13147	0.00135476		-2.13006	0.00244364		-2.12507	0.00381879
-2.1194	0.00424282		-2.11884	0.00121999		-2.11905	0.00146507		-2.12014	0.00134975		-2.12392	0.000888942		-2.12177	0.000857791		-2.11535	0.00156173		-2.12066	0.000753639		-2.11993	0.00158306		-2.11701	0.00133528		-2.12163	0.00153363		-2.1216	0.00118088		-2.12468	0.00133417		-2.12055	0.00451991		-2.12397	0.000817259		-2.12319	0.00249411		-2.11788	0.00373365
-2.11159	0.00366203		-2.1129	0.000964311		-2.11124	0.00184429		-2.11514	0.00131676		-2.11986	0.0009245		-2.1149	0.00142174		-2.11098	0.00145016		-2.11597	0.000850499		-2.1143	0.00154922		-2.11358	0.00137669		-2.11382	0.00112829		-2.11442	0.00178852		-2.11999	0.000781646		-2.11368	0.00438991		-2.11897	0.000382814		-2.11506	0.00297069		-2.11319	0.00456945
-2.10659	0.0033963		-2.10477	0.000169464		-2.10374	0.00187801		-2.11076	0.000914284		-2.11423	0.000831547		-2.1074	0.00187594		-2.10598	0.00155708		-2.11128	0.000768591		-2.10649	0.00122097		-2.10858	0.00121611		-2.10694	0.000739186		-2.10692	0.00106895		-2.11343	0.00110197		-2.10931	0.00465401		-2.1146	0.000458718		-2.10944	0.00218405		-2.1085	0.00377164
-2.10253	0.0035511		-2.09821	0.000720866		-2.09968	0.00143289		-2.10389	0.000967394		-2.10642	0.000711154		-2.1024	0.00118558		-2.09785	0.00141374		-2.10379	0.00109341		-2.09961	0.00166229		-2.10076	0.00128883		-2.10257	0.00105658		-2.10191	0.00081901		-2.10531	0.000736558		-2.104	0.00265242		-2.10772	0.000627806		-2.10537	0.00247628		-2.10069	0.00429939
-2.09534	0.00412267		-2.09415	0.000688906		-2.0953	0.00163271		-2.09608	0.000615954		-2.09923	0.00122829		-2.09802	0.000617051		-2.09098	0.00134763		-2.09629	0.000982462		-2.09555	0.0024619		-2.0942	0.00137164		-2.09725	0.00126516		-2.09754	0.00133597		-2.09968	0.000332824		-2.09618	0.00152408		-2.09991	0.00082199		-2.09912	0.00113025		-2.09319	0.00352699
-2.08721	0.00390558		-2.08852	0.00123025		-2.08812	0.00139396		-2.09014	0.00105868		-2.09486	0.000691056		-2.09146	0.000807602		-2.08691	0.00106948		-2.09129	0.000325681		-2.08992	0.00186739		-2.08983	0.00115453		-2.08944	0.00167724		-2.09098	0.000723331		-2.09562	0.000284048		-2.08899	0.00193617		-2.09397	0.000474763		-2.091	0.000524933		-2.08882	0.00311435
-2.08221	0.00299096		-2.0804	0.000950107		-2.08093	0.00223951		-2.08607	0.000879223		-2.08985	0.000463602		-2.08334	0.00108083		-2.08223	0.000959198		-2.08691	0.000727204		-2.0818	0.00187265		-2.08483	0.000476271		-2.08225	0.000684353		-2.08285	0.00126156		-2.08968	0.00107471		-2.08431	0.00276935		-2.08991	0.000352781		-2.08506	0.00153461		-2.08475	0.00416162
-2.07878	0.00269912		-2.07383	0.000802737		-2.07624	0.00182252		-2.07983	0.000805366		-2.08236	0.000707675		-2.0774	0.000858208		-2.07504	0.00154701		-2.07973	0.00107217		-2.07493	0.0015902		-2.07733	0		-2.07788	0.00146846		-2.07692	0.000732711		-2.08156	0.00138233		-2.07962	0.00174484		-2.08397	0.000982439		-2.081	0.00198308		-2.07788	0.00377416
-2.07221	0.00325226		-2.0704	0.00117225		-2.07155	0.00097928		-2.0717	0.0010203		-2.07486	0.000809324		-2.07365	0.000872577		-2.06817	0.000697058		-2.0716	0.00114541		-2.07118	0.00110812		-2.06983	0.00106373		-2.07319	0.00188055		-2.07285	0.000950544		-2.075	0.000669133		-2.07181	0.00527541		-2.07585	0.000583991		-2.07475	0.000820491		-2.07038	0.00314204
-2.0644	0.00336643		-2.0654	0.00146955		-2.06468	0.00131284		-2.06576	0.00137194		-2.07017	0.000984406		-2.0674	0.000432123		-2.06316	0.00143182		-2.06629	0.00151681		-2.06649	0.00181696		-2.06483	0.00141683		-2.06538	0.00114368		-2.0666	0.00151503		-2.07093	0.00110463		-2.06431	0.00577908		-2.0696	0.0012733		-2.06662	0.0012874		-2.06538	0.00371008
-2.05909	0.00421585		-2.05759	0.000996073		-2.05687	0.00168724		-2.0617	0.00232295		-2.06548	0.00123234		-2.05927	0.000105167		-2.05848	0.00167898		-2.06222	0.000942591		-2.05899	0.0016066		-2.06045	0.001474		-2.05788	0.00139444		-2.05848	0.000824013		-2.06531	0.000623841		-2.06024	0.00273582		-2.06522	0.00145946		-2.06037	0.00157843		-2.061	0.00369474
-2.05471	0.00401634		-2.05102	0.000786363		-2.05124	0.00175045		-2.05576	0.00150534		-2.05798	0.00090131		-2.05302	0.000286555		-2.0516	0.000707131		-2.05535	0.000981378		-2.05211	0.0010745		-2.05326	0.00138867		-2.05381	0.00136554		-2.05223	0.000886132		-2.05687	0.00127658		-2.05618	0.00453872		-2.0596	0.0014282		-2.05693	0.00167362		-2.05413	0.00413233
-2.04846	0.00307391		-2.04633	0.000905126		-2.04718	0.00112457		-2.04764	0.000825905		-2.05017	0.000882565		-2.04896	0.00112227		-2.04379	0.0010359		-2.04722	0.00134086		-2.04711	0.00121277		-2.04545	0.000803733		-2.04975	0.00117637		-2.04816	0.00161634		-2.05031	0.000750699		-2.049	0.00521573		-2.05116	0.000669153		-2.05162	0.00162436		-2.046	0.00337388
-2.04065	0.0028732		-2.04134	0.0013713		-2.04062	0.00114673		-2.04139	0.00135991		-2.04579	0.00123215		-2.04302	0.00101627		-2.03816	0.00183885		-2.04191	0.00125852		-2.04243	0.000961645		-2.04014	0.00087015		-2.04256	0.00131282		-2.04223	0.00153901		-2.04687	0.000314995		-2.0415	0.00603337		-2.0446	0.000328714		-2.04381	0.00155365		-2.04038	0.00367964
-2.03409	0.00270936		-2.03415	0.00141411		-2.03249	0.00138799		-2.03764	0.00156115		-2.04204	0.000541482		-2.0349	0.00119641		-2.0341	0.00142847		-2.03847	0.00108604		-2.03524	0.00107281		-2.03577	0.000838202		-2.03506	0.00111226		-2.0341	0.00149294		-2.04187	0.000943549		-2.03618	0.00616909		-2.04116	0.000749171		-2.03725	0.0013004		-2.03632	0.00368055
-2.02971	0.00353386		-2.02634	0.00139596		-2.02655	0.00147104		-2.03264	0.00104208		-2.03517	0.000290066		-2.02865	0.00114331		-2.02754	0.00151679		-2.03223	0.00034085		-2.02742	0.00120059		-2.02889	0.000578208		-2.03006	0.0008769		-2.02785	0.00184793		-2.03406	0.000751109		-2.03181	0.00409883		-2.03616	0.000833509		-2.03287	0.00188819		-2.03007	0.00347824
-2.0244	0.00360554		-2.02134	0.000553177		-2.0228	0.000990842		-2.02482	0.00102631		-2.02767	0.000914837		-2.0249	0.000637668		-2.01941	0.000955065		-2.02473	0.000560571		-2.02211	0.00142166		-2.02076	0.000984909		-2.02569	0.00120843		-2.02441	0.00135494		-2.0275	0.000757053		-2.02525	0.00243575		-2.02866	0.000734566		-2.02787	0.00141342		-2.02194	0.00359816
-2.01659	0.00301298		-2.01696	0.000806091		-2.01655	0.00129569		-2.01826	0.000379862		-2.02236	0.000751929		-2.0199	0.000481063		-2.01348	0.00130631		-2.01879	0.000702501		-2.01774	0.00166123		-2.01576	0.000966623		-2.01881	0.00110066		-2.0191	0.00115712		-2.02281	0.000534691		-2.01712	0.00255676		-2.0221	0.00109414		-2.02037	0.000966457		-2.016	0.00380528
-2.00971	0.00296912		-2.01009	0.000660695		-2.00812	0.00173002		-2.01358	0		-2.01798	0.000828262		-2.01209	0.0010373		-2.00942	0.0013218		-2.01472	0.00143296		-2.01118	0.00166081		-2.01233	0.00121821		-2.011	0.0010414		-2.0116	0.00130283		-2.01781	0.000445132		-2.01118	0.00326238		-2.01741	0.00093307		-2.01287	0.000908132		-2.01194	0.0025882
-2.00534	0.00300359		-2.00196	0.000689103		-2.00218	0.00165256		-2.00857	0.000646243		-2.01142	0.00110306		-2.00552	0.001282		-2.00317	0.000756976		-2.00879	0.00170468		-2.00336	0.00112935		-2.00607	0.000864685		-2.00537	0.00103001		-2.00504	0.00108416		-2.01062	0.000454354		-2.00743	0.00305307		-2.01241	0.000647965		-2.00818	0.00174827		-2.00569	0.00339013
-2.00034	0.00382656		-1.99665	0.000247391		-1.99874	0.0021237		-2.00107	0.0015348		-2.00361	0.000777438		-2.00084	0.00108937		-1.99473	0.00148683		-2.00098	0.00134195		-1.99743	0.0021637		-1.99826	0.001536		-2.001	0.000734546		-2.00035	0.000892177		-2.00312	0.0011532		-2.00118	0.00458696		-2.00522	0.0010966		-2.0035	0.000624661		-1.99757	0.00416963
-1.99253	0.00373422		-1.99258	0.00061966		-1.99312	0.00219924		-1.99357	0.00131468		-1.99736	0.000630376		-1.99583	0.00126472		-1.9891	0.00168131		-1.99441	0.00085895		-1.99336	0.00255542		-1.99233	0.0017733		-1.99475	0.00125356		-1.99535	0.000816718		-1.99812	0.00177315		-1.99306	0.00297212		-1.99741	0.00114638		-1.99631	0.000302207		-1.99132	0.00295437
-1.98503	0.00412471		-1.98571	0.000956025		-1.9853	0.00180768		-1.98889	0.00145119		-1.99329	0.00087754		-1.98865	0.000989823		-1.98567	0.0018169		-1.98973	0.00114151		-1.98711	0.00154817		-1.98827	0.000849342		-1.98694	0.000952822		-1.98785	0.00123446		-1.99375	0.000901126		-1.98681	0.00453381		-1.99241	0.000878353		-1.9885	0.000668784		-1.98788	0.00284315
-1.98096	0.00385489		-1.97759	0.000991733		-1.97905	0.0026064		-1.9842	0.00139622		-1.98767	0.000752895		-1.98115	0.000671613		-1.98004	0.00181044		-1.98472	0.000732837		-1.97899	0.00194284		-1.98232	0.00118059		-1.98069	0.00143683		-1.98035	0.00193527		-1.98656	0.00078226		-1.98274	0.0044635		-1.98835	0.000745263		-1.9835	0.00182321		-1.98257	0.00307727
-1.97659	0.00269537		-1.97258	0.00122137		-1.97468	0.000860002		-1.97732	0.00148543		-1.97954	0.00067289		-1.97615	0.000365066		-1.97223	0.00199174		-1.97691	0.000522434		-1.97336	0.00175076		-1.97451	0.00124827		-1.97663	0.000835775		-1.97536	0.00129303		-1.97875	0.000603347		-1.97681	0.00542095		-1.98116	0.000226068		-1.97912	0.00180931		-1.97475	0.00384007
-1.9694	0.0030094		-1.96883	0.00110833		-1.96968	0.000860002		-1.96951	0.00146323		-1.97298	0.000412971		-1.97146	0.000296343		-1.96598	0.00229753		-1.96973	0.00103317		-1.96961	0.00125733		-1.96764	0.000913447		-1.97069	0.00118713		-1.97066	0.00118526		-1.97343	0.0008337		-1.96868	0.00708894		-1.97335	0.000272968		-1.97193	0.000774254		-1.96819	0.00419641
-1.96221	0.00341985		-1.96259	0.00109215		-1.96187	0.000763654		-1.9642	0.00135576		-1.96892	0.00100586		-1.96458	0.000705975		-1.9616	0.0017513		-1.96504	0.0012414		-1.96399	0.00158915		-1.96327	0.00101496		-1.96256	0.00154649		-1.96348	0.000861952		-1.96937	0.000563178		-1.96243	0.00418795		-1.96804	0.000224834		-1.96412	0.00138683		-1.96382	0.00385495
-1.95753	0.0036733		-1.95509	0.000930181		-1.95468	0.000883318		-1.96014	0.00124145		-1.96329	0.000602355		-1.95677	0.000914436		-1.95629	9.99488e-05		-1.96035	0.00130641		-1.95618	0.00120017		-1.95826	0.000717979		-1.95631	0.00142881		-1.95567	0.00131096		-1.9625	0.000182193		-1.95868	0.00622142		-1.96366	0.000710293		-1.95912	0.00221185		-1.95882	0.00328233
-1.95284	0.00428719		-1.94915	0.000114226		-1.94999	0.000982942		-1.95295	0.000963659		-1.95486	0.000538969		-1.95146	0.000872577		-1.94879	0.00110434		-1.95254	0.00132374		-1.94993	0.00170053		-1.95045	0.000961579		-1.95256	0.00179535		-1.95067	0.00133639		-1.95406	0.000589001		-1.95368	0.00589437		-1.95679	0.000688695		-1.95568	0.00126081		-1.95132	0.00375722
-1.94596	0.00383526		-1.94508	0.000529503		-1.9453	0.00141554		-1.94482	0.000748314		-1.94829	0.000257213		-1.9474	0.00116788		-1.94129	0.00152867		-1.94504	0.00122732		-1.94555	0.00183797		-1.94326	0.00103451		-1.94725	0.00161503		-1.94629	0.00059805		-1.94906	0.000814641		-1.94587	0.00406204		-1.94866	0.000368209		-1.94912	0.000896043		-1.94382	0.00283033
-1.93815	0.0030367		-1.93915	0.000595987		-1.9378	0.000596394		-1.93983	0.000795615		-1.94486	0.000583223		-1.94052	0.00107791		-1.9366	0.00171772		-1.94097	0.00134325		-1.94024	0.00156667		-1.93858	0.0011478		-1.93975	0.00191914		-1.93941	0.000763562		-1.94531	0.00109951		-1.93931	0.0044218		-1.94335	0.000301149		-1.94131	0.00154428		-1.93913	0.00268592
-1.93253	0.00281074		-1.93134	0.000619858		-1.9303	0.000768471		-1.93638	0.000680889		-1.93986	0.00059791		-1.93208	0.000736172		-1.93191	0.00163198		-1.9366	0.00140002		-1.93243	0.00165808		-1.93389	0.00135756		-1.93319	0.00175106		-1.93129	0.000714576		-1.93906	0.00147394		-1.93462	0.00214385		-1.93991	0.000910237		-1.936	0.00152705		-1.93444	0.0035453
-1.92846	0.00315805		-1.92446	0.000987787		-1.9253	0.00111609		-1.92982	0.000919885		-1.93236	0.000755794		-1.92709	0.000759704		-1.92441	0.00123735		-1.92972	0.00107889		-1.92524	0.00160449		-1.92608	0.000757913		-1.92881	0.001057		-1.92629	0.000928656		-1.93156	0.000887805		-1.92962	0.0018446		-1.93366	0.000759251		-1.93162	0.00135147		-1.92757	0.00284521
-1.9219	0.00348402		-1.92009	0.00147783		-1.92093	0.00142884		-1.92201	0.00120183		-1.92548	0.00117147		-1.92365	0.000750749		-1.91691	0.000738897		-1.92222	0.00139915		-1.92086	0.00151959		-1.91858	0.000663121		-1.9235	0.00125841		-1.92254	0.000791703		-1.92562	0.000622406		-1.92212	0.00323377		-1.92616	0.000599625		-1.92537	0.00199094		-1.91975	0.00350067
-1.91409	0.00390967		-1.91509	0.00177829		-1.91374	0.00116851		-1.9167	0.00141468		-1.92079	0.00110519		-1.9174	0.00113581		-1.91192	0.000687244		-1.91722	0.00134975		-1.91586	0.00111316		-1.91451	0.00159759		-1.916	0.000990361		-1.91629	0.000621189		-1.92124	0.00110648		-1.91462	0.00502031		-1.92022	0.000882467		-1.91725	0.00121094		-1.91444	0.00269164
-1.90815	0.00261276		-1.90727	0.00160212		-1.90562	0.00119125		-1.91233	0.00148086		-1.9161	0.00137554		-1.90958	0.00116413		-1.90723	0.00124536		-1.91285	0.000863283		-1.90836	0.00161437		-1.91014	0.00150931		-1.9085	0.000783263		-1.90879	0.000290583		-1.91531	0.00120997		-1.90993	0.00401625		-1.91585	0.000765216		-1.911	0.000372319		-1.91038	0.00260582
-1.90409	0.00324338		-1.90009	0.000686933		-1.90093	0.00104056		-1.90639	0.00149642		-1.90892	0.0018088		-1.90365	0.00112873		-1.90004	0.00114308		-1.90597	0.000977478		-1.90086	0.00129873		-1.90327	0.000966203		-1.9035	0.00123057		-1.90317	0.000530303		-1.9075	0.000828782		-1.90524	0.00633671		-1.91022	0.000641177		-1.90662	0.000372923		-1.90319	0.00403643
-1.89784	0.00322956		-1.89571	0.000414093		-1.89718	0.000822619		-1.89826	0.00118813		-1.90111	0.00117244		-1.89959	0.00163082		-1.89223	0.000748195		-1.89816	0.0010245		-1.89618	0.00126657		-1.89576	0.00125835		-1.89913	0.000880485		-1.89879	0.000913439		-1.90094	0.000924285		-1.89837	0.0028552		-1.90241	0.00137081		-1.90131	0.00163887		-1.89538	0.00379933
-1.8894	0.0029256		-1.89071	0.00110043		-1.89062	0.00153964		-1.8917	0.000779848		-1.89611	0.000488145		-1.89365	0.00116475		-1.88754	0.00120662		-1.89253	0.000477579		-1.89149	0.00167868		-1.89076	0.00177792		-1.89194	0.00113567		-1.89285	0.000901766		-1.89656	0.000671797		-1.89056	0.00235399		-1.89553	0.000839886		-1.89318	0.00173467		-1.89038	0.00318301
-1.88378	0.00355809		-1.8829	0.000462822		-1.8828	0.00147104		-1.88764	0.00116096		-1.89173	0.0007413		-1.88583	0.00132282		-1.88379	0.00100491		-1.88848	0.00089232		-1.88399	0.00146516		-1.88639	0.00164172		-1.88413	0.00100449		-1.88473	0.00129241		-1.89125	0.000482841		-1.88525	0.00418877		-1.89116	0.000760279		-1.88631	0.000803568		-1.88663	0.00341919
-1.88034	0.0038158		-1.8754	0.000852058		-1.87749	0.00166701		-1.88232	0.00177919		-1.88485	0.00117012		-1.87927	0.00156293		-1.87723	0.000602017		-1.88222	0.00118485		-1.87618	0.000990016		-1.87983	0.00182458		-1.87881	0.000813842		-1.87817	0.00137766		-1.88343	0.000949082		-1.88087	0.00284702		-1.88585	0.00050747		-1.88194	0.000456332		-1.88038	0.00335374
-1.87471	0.00310087		-1.87165	0.00123163		-1.87312	0.00196049		-1.8742	0.00162608		-1.87673	0.00126694		-1.8749	0.00148234		-1.86941	0.00118363		-1.8741	0.00085765		-1.8718	0.00130209		-1.87202	0.00182101		-1.87475	0.00130206		-1.87411	0.000403564		-1.87625	0.00108147		-1.87399	0.00537762		-1.87835	0.000208377		-1.87662	0.000771534		-1.87257	0.00389797
-1.8669	0.00235454		-1.86758	0.00102626		-1.86687	0.00151709		-1.86732	0.00148812		-1.8711	0.0010476		-1.86958	0.00129783		-1.8641	0.00120429		-1.86785	0.000715286		-1.86805	0.00101565		-1.86608	0.00111165		-1.86757	0.00103971		-1.86848	0.000791286		-1.87187	0.000518501		-1.86587	0.00504075		-1.87116	0.000541411		-1.86881	0.00120188		-1.86694	0.00404284
-1.86065	0.00349512		-1.8604	0.00100357		-1.85905	0.00119144		-1.86295	0.000735452		-1.86704	0.000807198		-1.86177	0.000597476		-1.86004	0.00141607		-1.8641	0.00110727		-1.86117	0.00144436		-1.86202	0.00185128		-1.85944	0.000713035		-1.86066	0.000881963		-1.86718	0.000501081		-1.86087	0.00486823		-1.86647	0.000951378		-1.86162	0.000611969		-1.86257	0.00435409
-1.85628	0.00358404		-1.8529	0.00116179		-1.8528	0.00142364		-1.85795	0.00130265		-1.86048	0.000958898		-1.85458	0.000144319		-1.85348	0.00168208		-1.85816	0.0011725		-1.85367	0.000643479		-1.85577	0.00154399		-1.85444	0.000456165		-1.85348	0.00117817		-1.85937	0.000438779		-1.85712	0.00430651		-1.86178	0.00148271		-1.85756	0.000430645		-1.85663	0.00426209
-1.85096	0.00322666		-1.8479	0.00109392		-1.84843	0.00163271		-1.85014	0.00162069		-1.85236	0.000607572		-1.85021	0.000864039		-1.84535	0.000722627		-1.84972	0.00137163		-1.84836	0.000441315		-1.84764	0.0012056		-1.85069	0.000470928		-1.84911	0.00140122		-1.85187	0.000877763		-1.85087	0.00351422		-1.85397	0.00105958		-1.85318	0.00140738		-1.84882	0.00321802
-1.84346	0.00341695		-1.84352	0.00123932		-1.84312	0.00156373		-1.84295	0.00103793		-1.84673	0.000678301		-1.84552	0.000505845		-1.8391	0.00159479		-1.84347	0.000737388		-1.84399	0.00105327		-1.84139	0.0013729		-1.84444	0.00121222		-1.8441	0.00150628		-1.84781	0.00137536		-1.84337	0.00404323		-1.84647	0.000874856		-1.84568	0.00160955		-1.84225	0.00268111
-1.83628	0.00408529		-1.83665	0.00136933		-1.8353	0.00113845		-1.83889	0.000521144		-1.84329	0.000349779		-1.83771	0.000485852		-1.83504	0.00212966		-1.83972	0.000876935		-1.83743	0.00144919		-1.83733	0.000969355		-1.83663	0.00147204		-1.83629	0.00117651		-1.84343	0.000847227		-1.83743	0.00533755		-1.84241	0.000619373		-1.8385	0.00148474		-1.83788	0.0028015
-1.83159	0.00313501		-1.82884	0.00128963		-1.82843	0.000608148		-1.83451	0.000903703		-1.83736	0.000870197		-1.83021	0.00162124		-1.82942	0.00136571		-1.83472	0.00123079		-1.82961	0.00145634		-1.83139	0.00120623		-1.831	0.000963156		-1.8291	0.000796081		-1.83625	0.000614618		-1.83337	0.00280205		-1.83835	0.000839475		-1.83381	0.00120399		-1.83257	0.00345833
-1.82659	0.00260064		-1.82321	0.00132534		-1.82405	0.000764617		-1.82732	0.000938141		-1.82986	0.000458771		-1.82615	0.00178201		-1.82129	0.00132697		-1.82722	0.00096426		-1.82336	0.00155217		-1.82327	0.00173484		-1.82663	0.00082502		-1.82504	0.00154109		-1.82906	0.00094109		-1.82743	0.00309967		-1.83116	0.00109311		-1.82912	0.000590512		-1.82475	0.00317271
-1.8194	0.00312852		-1.81884	0.00106078		-1.81905	0.000868865		-1.82045	0.00184164		-1.82392	0.000678108		-1.82209	0.00114643		-1.81441	0.00102247		-1.82066	0.000246157		-1.8193	0.00179069		-1.81702	0.00116293		-1.82069	0.00054221		-1.82066	0.00083923		-1.82406	0.000483251		-1.81931	0.0020163		-1.82366	0.000965982		-1.82193	0.00155123		-1.81788	0.00273764
-1.8119	0.00352481		-1.81258	0.00122551		-1.81093	0.00126312		-1.81545	0.00192939		-1.81954	0.000471912		-1.8149	0.000919017		-1.81035	0.000567409		-1.81597	0.000393505		-1.81336	0.00132268		-1.81326	0.000729539		-1.81256	0.000847796		-1.81348	0.00168138		-1.81968	0.000842923		-1.81275	0.00343981		-1.81866	0.00056589		-1.81412	0.00181203		-1.8135	0.0036421
-1.8069	0.00391906		-1.80446	0.0012115		-1.80374	0.00132209		-1.81108	0.00146302		-1.81361	0.000213346		-1.8074	0.00180555		-1.80504	0.00051808		-1.81097	0.000883869		-1.80555	0.000958914		-1.80827	0.000758123		-1.806	0.00108252		-1.80629	0.00126343		-1.81281	0.0011282		-1.80837	0.00480036		-1.81428	0.000615053		-1.8085	0.0011913		-1.80819	0.00367918
-1.80253	0.00355895		-1.79852	0.00111148		-1.79968	0.00100607		-1.8042	0.00107195		-1.80579	0.000805459		-1.80271	0.000893402		-1.79691	0.000133265		-1.80347	0.000886902		-1.79867	0.00121004		-1.80045	0.000873092		-1.80163	0.00109728		-1.80129	0.000762311		-1.80468	0.000684913		-1.80306	0.00502195		-1.80741	0.000430331		-1.80444	0.00155032		-1.80038	0.00397762
-1.79503	0.00257743		-1.79446	0.000612755		-1.7953	0.00175739		-1.79607	0.00162028		-1.79923	0.000929717		-1.79834	0.000583315		-1.79004	0.000388431		-1.79597	0.00126849		-1.79461	0.00122727		-1.79389	0.0009868		-1.79631	0.00138262		-1.79692	0.000902808		-1.79906	0.000533667		-1.79524	0.00185604		-1.7996	0.00105834		-1.79787	0.0021085		-1.79319	0.00339974
-1.78721	0.00286279		-1.78852	0.00103553		-1.78812	0.00154504		-1.79045	0.00102424		-1.79485	0.00053066		-1.79146	0.000738879		-1.78629	0.00120455		-1.79129	0.00114866		-1.78899	0.000946305		-1.78951	0.000948127		-1.7885	0.000601471		-1.79004	0.000834019		-1.795	0.000571376		-1.78806	0.0037268		-1.79397	0.00126076		-1.79006	0.00112421		-1.78913	0.00382245
-1.78253	0.002623		-1.78009	0.00174456		-1.78093	0.000979666		-1.78639	0.00113482		-1.78954	0.000820339		-1.78333	0.000755539		-1.7816	0.000915551		-1.7866	0.000907921		-1.78086	0.00111842		-1.78452	0.000660599		-1.78131	0.000905371		-1.78191	0.00158799		-1.78874	0.000676921		-1.78369	0.00493037		-1.7896	0.000725104		-1.78412	0.00121668		-1.78475	0.00377072
-1.77878	0.00272711		-1.77383	0.00104875		-1.77624	0.000918967		-1.78013	0.00113896		-1.78204	0.000732411		-1.77771	0.000855084		-1.7741	0.00155966		-1.77972	0.000428825		-1.7743	0.00198024		-1.77702	0.00104901		-1.77694	0.00148153		-1.77629	0.00184293		-1.78062	0.000985152		-1.77868	0.00468262		-1.78335	0.000932864		-1.78006	0.00200272		-1.77757	0.00426507
-1.77221	0.00301434		-1.7704	0.00059283		-1.77155	0.00104904		-1.77201	0.000585457		-1.77454	0.000918316		-1.77365	0.00101523		-1.76723	0.00178952		-1.77191	0.000810195		-1.77055	0.00146201		-1.76952	0.00131594		-1.77194	0.00162958		-1.77223	0.00175288		-1.77468	0.000604371		-1.77087	0.00489358		-1.77522	0.00073724		-1.7735	0.000925962		-1.77038	0.00452254
-1.7644	0.00293055		-1.76508	0.00104243		-1.76437	0.00131573		-1.76607	0.000922789		-1.76986	0.00103794		-1.7674	0.000970456		-1.76254	0.000369578		-1.7666	0.000978561		-1.76555	0.00158306		-1.76451	0.000735634		-1.76413	0.00115043		-1.76567	0.00101454		-1.77062	0.00067856		-1.76368	0.00291816		-1.76897	0.000460981		-1.76538	0.00186703		-1.76538	0.00361739
-1.75909	0.00322461		-1.75727	0.0011099		-1.75687	0.00147566		-1.76201	0.000801424		-1.76517	0.00127582		-1.75927	0.0006839		-1.75785	0.000339103		-1.76222	0.000589607		-1.75805	0.00179783		-1.76014	0.00167073		-1.75663	0.000837252		-1.75755	0.000570952		-1.76437	0.000728976		-1.75962	0.00254858		-1.76491	0.00100671		-1.75975	0.00114385		-1.761	0.00321413
-1.75471	0.00332581		-1.75071	0.00132455		-1.75124	0.00150746		-1.75576	0.00100723		-1.75767	0.000669412		-1.75333	0.000790317		-1.75066	0.000576448		-1.75535	0.000965993		-1.75118	0.00193506		-1.75295	0.00183551		-1.75288	0.00121834		-1.7516	0.0010408		-1.75625	0.00126531		-1.75524	0.00634325		-1.75897	0.000733949		-1.75631	0.000911758		-1.75413	0.00349128
-1.74846	0.00298704		-1.74665	0.00125984		-1.74718	0.00174794		-1.74732	0.000713046		-1.74985	0.000643323		-1.74927	0.000930055		-1.74285	0.000911419		-1.74723	0.000736088		-1.7468	0.00122181		-1.74514	0.00102968		-1.7485	0.000689836		-1.74786	0.000875293		-1.75	0.00110443		-1.74806	0.003986		-1.75085	0.00128585		-1.75068	0.00145059		-1.746	0.00344231
-1.74065	0.00304711		-1.74133	0.00104382		-1.74062	0.00118527		-1.74139	0.00129415		-1.74548	0.000541868		-1.74302	0.000693063		-1.73754	0.000855375		-1.74222	0.00192614		-1.7418	0.000989596		-1.73982	0.00127286		-1.74131	0.00158719		-1.74161	0.00136828		-1.74625	0.00097552		-1.74056	0.00269576		-1.7446	0.000652696		-1.74287	0.00100121		-1.74038	0.00301708
-1.7344	0.00299506		-1.73383	0.000795438		-1.73249	0.00117352		-1.73795	0.000846236		-1.74142	0.000535877		-1.7349	0.000757205		-1.73316	0.00127144		-1.73847	0.00135191		-1.73461	0.00148807		-1.73577	0.00153369		-1.73413	0.000764071		-1.73317	0.00200115		-1.74093	0.000491449		-1.73556	0.00236707		-1.74085	0.000431154		-1.73631	0.000972502		-1.73632	0.00393848
-1.73003	0.00390097		-1.72633	0.000997454		-1.72687	0.00126177		-1.73233	0.000990215		-1.73454	0.000823044		-1.72865	0.000847795		-1.7266	0.000546748		-1.73223	0.00107564		-1.7268	0.000922978		-1.72858	0.00104985		-1.72913	0.00135816		-1.72723	0.000918025		-1.73312	0.000977364		-1.73118	0.00459432		-1.73553	0.000416549		-1.73194	0.00173436		-1.72975	0.00283354
-1.7244	0.00410765		-1.72165	0.00108544		-1.7228	0.000944595		-1.72483	0.00125597		-1.72704	0.00094479		-1.72521	0.00119662		-1.71848	0.000957131		-1.72472	0.0010544		-1.7218	0.00122643		-1.72045	0.00147211		-1.72444	0.00260708		-1.72379	0.000985981		-1.72656	0.00141573		-1.72431	0.00499987		-1.72803	0.000523103		-1.72663	0.00112874		-1.72194	0.00291387
-1.71659	0.00360742		-1.71696	0.0011032		-1.71655	0.00168397		-1.71826	0.00119705		-1.72204	0.001036		-1.7199	0.00111811		-1.71285	0.0019809		-1.71879	0.00102017		-1.71743	0.000900912		-1.71546	0.0013233		-1.71756	0.0018042		-1.71848	0.00161342		-1.72218	0.00120751		-1.71649	0.00616337		-1.72147	9.5652e-05		-1.71912	0.000787249		-1.716	0.00376065
-1.70971	0.0031263		-1.70977	0.00103553		-1.70812	0.00143578		-1.71389	0.0012429		-1.71767	0.000541288		-1.71209	0.000916935		-1.70879	0.00125207		-1.71472	0.00164596		-1.71055	0.000820635		-1.7117	0.000929211		-1.70975	0.00118101		-1.71067	0.00112981		-1.71719	0.00107779		-1.71087	0.00604645		-1.7171	0.000426834		-1.71193	0.00131309		-1.71194	0.0039355
-1.70565	0.00391223		-1.70196	0.00136223		-1.70218	0.00102649		-1.70889	0.00160949		-1.7111	0.000458771		-1.70552	0.00051355		-1.70223	0.00074897		-1.70879	0.001379		-1.70243	0.00124388		-1.70545	0.00100593		-1.70413	0.00100512		-1.70441	0.000973474		-1.70968	0.000918956		-1.7068	0.00340302		-1.7121	0.000811294		-1.70725	0.000300393		-1.70569	0.0023083
-1.70034	0.00424947		-1.69696	0.00122157		-1.69874	0.000343962		-1.70108	0.0010066		-1.70329	0.000809903		-1.70115	0.000635169		-1.6941	0.00154004		-1.70066	0.00157424		-1.69711	0.0016896		-1.69795	0.000494136		-1.70007	0.00164793		-1.70004	0.00162155		-1.70218	0.000565228		-1.70024	0.00398927		-1.7046	0.000824458		-1.70225	0.000889092		-1.69725	0.00326288
-1.69221	0.00370009		-1.6929	0.00166525		-1.69312	0.00100279		-1.69389	0.000503717		-1.69735	0.0011419		-1.69584	0.00101106		-1.68848	0.0011999		-1.6941	0.000943458		-1.69305	0.00158873		-1.69233	0.000705578		-1.69381	0.00160491		-1.69473	0.00108145		-1.69718	0.000789638		-1.69212	0.00392876		-1.6971	0.000692603		-1.69506	0.00152584		-1.69132	0.00498598
-1.68503	0.00308244		-1.68571	0.0014078		-1.6853	0.00162674		-1.6892	0.000424467		-1.69329	0.00120239		-1.68865	0.00191467		-1.68504	0.000576448		-1.68972	0.000767941		-1.68618	0.00207796		-1.68795	0.000921014		-1.68569	0.00147647		-1.68692	0.00149586		-1.69281	0.000682864		-1.68618	0.0035412		-1.6921	0.000694043		-1.68756	0.00168631		-1.68788	0.00283239
-1.68128	0.00407351		-1.67759	0.00183689		-1.67905	0.00172906		-1.68451	0.000936689		-1.68704	0.00104451		-1.68115	0.00183637		-1.6791	0.00149355		-1.68441	0.000727637		-1.67805	0.00117116		-1.68202	0.000660389		-1.67975	0.00166712		-1.67973	0.00107666		-1.68562	0.000585107		-1.68212	0.00620098		-1.68772	0.000472706		-1.68256	0.00238653		-1.68225	0.00246942
-1.67659	0.00325533		-1.67259	0.00143818		-1.67468	0.00118084		-1.67701	0.00162588		-1.67892	0.000401763		-1.67615	0.000758246		-1.67129	0.00163327		-1.67691	0.000947575		-1.67274	0.00136387		-1.67389	0.00108853		-1.67569	0.00125862		-1.67504	0.00076919		-1.67781	0.000111693		-1.67618	0.00474558		-1.68053	0.000203646		-1.67819	0.00182926		-1.67475	0.00317591
-1.66909	0.00268205		-1.66884	0.000828976		-1.66937	0.0009814		-1.6692	0.00129083		-1.67267	0.000364659		-1.67146	0.000762828		-1.66535	0.000365445		-1.66973	0.00128474		-1.6693	0.00200105		-1.66764	0.00121821		-1.66944	0.00107978		-1.67036	0.000722288		-1.6725	0.000390413		-1.66774	0.00584122		-1.67272	0.000350313		-1.67069	0.00129858		-1.66819	0.00454107
-1.66221	0.00272762		-1.66259	0.000449012		-1.66155	0.000364388		-1.66451	0.000648733		-1.66861	0.000509209		-1.66459	0.00123952		-1.66129	0.000709713		-1.66535	0.000658297		-1.66305	0.00115919		-1.66326	0.00106373		-1.661	0.00150009		-1.66286	0.000915107		-1.66843	0.000694136		-1.66149	0.0059933		-1.66741	0.000639943		-1.66288	0.00189212		-1.66382	0.00342125
-1.65753	0.00311128		-1.65477	0.00120184		-1.65437	0.00118585		-1.66014	0.00110598		-1.66267	0.000728353		-1.65677	0.00117163		-1.65567	0.00128022		-1.66035	0.00118593		-1.65524	0.00172491		-1.65795	0.00188869		-1.65506	0.00100533		-1.65504	0.00141247		-1.66125	0.00142168		-1.65806	0.00628275		-1.66335	0.000179579		-1.65818	0.00168571		-1.65882	0.00318392
-1.65284	0.00346423		-1.64915	0.000735267		-1.64999	0.00162577		-1.65295	0.00125369		-1.65454	0.00112683		-1.65146	0.000952129		-1.64785	0.00201395		-1.65254	0.00107065		-1.6493	0.00175475		-1.65014	0.00180356		-1.65163	0.00072379		-1.65004	0.00142144		-1.65281	0.000626095		-1.65274	0.00578235		-1.65616	0.000338382		-1.65444	0.00161953		-1.651	0.00388859
-1.64565	0.00237331		-1.64477	0.000471108		-1.64499	0.00196916		-1.64482	0.000988555		-1.64798	0.00139371		-1.6474	0.000825304		-1.64066	0.00079959		-1.64504	0.00122017		-1.64524	0.00171713		-1.64295	0.00106057		-1.646	0.000863192		-1.64598	0.00138433		-1.64781	0.000398201		-1.64524	0.00444306		-1.64804	0.000202618		-1.64788	0.0011641		-1.64382	0.00347847
-1.63815	0.00230368		-1.63884	0.000830357		-1.63749	0.00198323		-1.64014	0.00134041		-1.64454	0.000990784		-1.64021	0.000973788		-1.63629	0.000909869		-1.64097	0.00106437		-1.63961	0.00204161		-1.63857	0.000834629		-1.6385	0.00149292		-1.63848	0.00147293		-1.64437	0.000650073		-1.63868	0.00454853		-1.64335	0.000257746		-1.64006	0.00107555		-1.63913	0.00386753
-1.63284	0.00299096		-1.63102	0.00125313		-1.62999	0.00139608		-1.6367	0.00162235		-1.63954	0.00125244		-1.63208	0.00103855		-1.63129	0.00170662		-1.6366	0.00114173		-1.6318	0.00125459		-1.63358	0.0012882		-1.63194	0.00130776		-1.63067	0.00132096		-1.63781	0.000795172		-1.63431	0.00690661		-1.6396	0.000434239		-1.63475	0.00153007		-1.63444	0.00377507
-1.62846	0.00290751		-1.62446	0.00119552		-1.6253	0.00129742		-1.62982	0.00182463		-1.63173	0.000918122		-1.62708	0.000815516		-1.62348	0.00102609		-1.62941	0.0015842		-1.62461	0.00104865		-1.62545	0.00159233		-1.62756	0.0013356		-1.62598	0.00129595		-1.63	0.000846407		-1.6293	0.00661798		-1.63304	0.00118938		-1.63069	0.00254216		-1.62725	0.00384991
-1.6219	0.00290034		-1.62009	0.000464795		-1.62093	0.000790824		-1.62232	0.00175762		-1.62517	0.00103446		-1.62365	0.00095921		-1.61598	0.000683112		-1.62223	0.00107932		-1.62024	0.00113754		-1.61826	0.00137164		-1.62225	0.00108294		-1.62223	0.000610349		-1.62468	0.0014104		-1.62149	0.00741763		-1.62554	0.00104292		-1.62413	0.00162829		-1.61944	0.00427147
-1.61378	0.00309473		-1.61477	0.00111918		-1.61343	0.000988144		-1.61701	0.00150887		-1.62048	0.00107581		-1.61709	0.00111956		-1.6116	0.00109789		-1.61722	0.000550386		-1.61524	0.00128906		-1.61421	0.00135483		-1.61475	0.00166965		-1.61567	0.00185481		-1.62031	0.00122903		-1.61399	0.00652886		-1.6196	0.000916408		-1.616	0.00166063		-1.61444	0.00414217
-1.60815	0.00352806		-1.60696	0.00112884		-1.60562	0.00133307		-1.61264	0.00163418		-1.61548	0.00078652		-1.60959	0.000318626		-1.60692	0.00121901		-1.61285	0.000791343		-1.60742	0.000910579		-1.60983	0.00119215		-1.60725	0.00168125		-1.60786	0.00202407		-1.61437	0.0011241		-1.60931	0.00616828		-1.61553	0.00104374		-1.60974	0.00127471		-1.61007	0.00420121
-1.60409	0.00363746		-1.59977	0.000961154		-1.60093	0.000461121		-1.60639	0.00136759		-1.60798	0.000542834		-1.60396	0.00039797		-1.5991	0.000977018		-1.60597	0.000574872		-1.60024	0.000834505		-1.60264	0.000991425		-1.60257	0.00136238		-1.60254	0.00144479		-1.60625	0.000950722		-1.60462	0.00618708		-1.6096	0.000319046		-1.60569	0.00135086		-1.60288	0.00415361
-1.59753	0.00292662		-1.5954	0.00158594		-1.59718	0.000695632		-1.59857	0.00131904		-1.60048	0.000519065		-1.59959	0.00119808		-1.5916	0.00108317		-1.59816	0.00089492		-1.59555	0.000568245		-1.59545	0.00183719		-1.59788	0.0010201		-1.59848	0.00139872		-1.59968	0.00105258		-1.59743	0.0035878		-1.60147	0.000748143		-1.59975	0.000938957		-1.59507	0.00296513
-1.5894	0.00278326		-1.5904	0.00198406		-1.5903	0.000767508		-1.59233	0.00126199		-1.59579	0.000664774		-1.59365	0.00107583		-1.58723	0.000843237		-1.59254	0.000481697		-1.59086	0.0011863		-1.59046	0.000978183		-1.59038	0.000517324		-1.59192	0.00117692		-1.59531	0.000656221		-1.58962	0.00421493		-1.59491	0.000731275		-1.59194	0.000983683		-1.59007	0.00323885
-1.58378	0.00265287		-1.58227	0.00199668		-1.5828	0.00140437		-1.58795	0.000519899		-1.59111	0.000774539		-1.58552	0.00120224		-1.58317	0.0012482		-1.58816	0.000887552		-1.58305	0.00146495		-1.58608	0.000999622		-1.58288	0.000874369		-1.58411	0.00102851		-1.59	0.000343072		-1.58462	0.00524761		-1.59085	0.000678821		-1.58506	0.000872773		-1.58663	0.00241586
-1.58034	0.00319628		-1.57509	0.00124899		-1.57749	0.00134174		-1.58232	0.00105453		-1.58423	0.000888942		-1.57896	0.00125326		-1.57629	0.00179494		-1.58191	0.000494264		-1.57555	0.00189828		-1.5792	0.000779772		-1.57788	0.00197777		-1.57786	0.00145		-1.58218	0.000895388		-1.58025	0.00459187		-1.58554	0.000182664		-1.581	0.00130553		-1.58007	0.00293012
-1.5744	0.00265782		-1.57134	0.000823649		-1.57343	0.00129145		-1.5742	0.00097258		-1.57642	0.000572401		-1.5749	0.000657036		-1.5691	0.00162036		-1.5741	0.000407156		-1.57118	0.00122517		-1.57139	0.00121926		-1.57319	0.00230529		-1.57348	0.00163343		-1.57531	0.000875099		-1.57306	0.00470225		-1.57741	0.000980176		-1.57569	0.00106316		-1.57225	0.00299076
-1.56659	0.00319713		-1.56696	0.00041725		-1.56687	0.000202909		-1.56732	0.000644169		-1.57111	0.000606993		-1.56958	0.000773657		-1.56379	0.00169551		-1.56816	0.000848115		-1.56711	0.00125943		-1.56577	0.0015524		-1.566	0.00148238		-1.56786	0.00164011		-1.57093	0.00116058		-1.56494	0.00519201		-1.57054	0.00101515		-1.56756	0.000734363		-1.56694	0.00293835
-1.56034	0.00335636		-1.55977	0.000914004		-1.55905	0.000609882		-1.56326	0.000635455		-1.56673	0.000370457		-1.56177	0.000329872		-1.55941	0.00181173		-1.5641	0.000560571		-1.56024	0.00127729		-1.5617	0.00146118		-1.55819	0.00175992		-1.56004	0.00151399		-1.56562	0.00129871		-1.56024	0.00498352		-1.56616	0.000644468		-1.56069	0.00207949		-1.56257	0.00348831
-1.55596	0.00362431		-1.55259	0.00140149		-1.5528	0.000717985		-1.55795	0.00088109		-1.55986	0.000129283		-1.55459	0.000687024		-1.55285	0.00120739		-1.55785	0.000669348		-1.55274	0.00113586		-1.55514	0.00110597		-1.5535	0.00193728		-1.55317	0.000595966		-1.55781	0.0016672		-1.5565	0.00281186		-1.56116	0.000814379		-1.55693	0.000970688		-1.55632	0.0026477
-1.55065	0.00313569		-1.5479	0.00137347		-1.54874	0.000687539		-1.54982	0.00063338		-1.55173	0.000847587		-1.55021	0.0010625		-1.54473	0.000901863		-1.54972	0.000869134		-1.54774	0.00121383		-1.54701	0.00134894		-1.54975	0.00133496		-1.5491	0.000777737		-1.55062	0.00118558		-1.55024	0.00401707		-1.55303	0.0006348		-1.55194	0.00119613		-1.54819	0.00286443
-1.54284	0.00304302		-1.54321	0.00134566		-1.5428	0.00174833		-1.54295	0.000731095		-1.54673	0.00100334		-1.54521	0.00120287		-1.53879	0.000982183		-1.54347	0.00114974		-1.54336	0.0016026		-1.54108	0.00087057		-1.54319	0.00116878		-1.54379	0.000325186		-1.54656	0.000326471		-1.54243	0.00483798		-1.54585	0.000911471		-1.54444	0.00163131		-1.54194	0.00350685
-1.53565	0.00273479		-1.53634	0.00140149		-1.53499	0.00129761		-1.5392	0.00105038		-1.54298	0.000895899		-1.5374	0.000903607		-1.53473	0.00149097		-1.54004	0.000912255		-1.5368	0.0012237		-1.53701	0.00146517		-1.53538	0.00165869		-1.53567	0.00120611		-1.54218	0.000844153		-1.53681	0.00510044		-1.5421	0.000503561		-1.53756	0.00140012		-1.53757	0.00412798
-1.53128	0.00259126		-1.52852	0.0011178		-1.52843	0.00142923		-1.53451	0.00091698		-1.53673	0.000906914		-1.53021	0.000869037		-1.52879	0.000542099		-1.53441	0.0016789		-1.52868	0.000725017		-1.53108	0.00113498		-1.53006	0.000707973		-1.52848	0.00138767		-1.535	0.00104868		-1.53275	0.00695076		-1.53772	0.000541617		-1.53287	0.00126353		-1.53225	0.00474865
-1.52628	0.00294591		-1.5229	0.00196413		-1.52437	0.00125946		-1.52701	0.00130452		-1.52923	0.000948076		-1.52615	0.00103043		-1.52067	0.00138301		-1.52691	0.00183838		-1.52274	0.000802142		-1.52264	0.00126046		-1.52569	0.00108526		-1.52473	0.000894053		-1.52781	0.00143848		-1.52649	0.00643892		-1.53022	0.000986553		-1.52819	0.000834998		-1.52444	0.00504869
-1.51878	0.00346849		-1.51883	0.00105467		-1.51874	0.00107216		-1.52014	0.00182276		-1.52329	0.00102364		-1.52177	0.000655578		-1.51441	0.00150698		-1.52035	0.00142364		-1.51868	0.00156583		-1.5167	0.00168376		-1.51944	0.00129321		-1.52035	0.000889676		-1.52312	0.000801935		-1.51837	0.00576191		-1.52304	0.000743617		-1.521	0.000873075		-1.51757	0.0049084
-1.51128	0.0036692		-1.51227	0.000533843		-1.51062	0.000907983		-1.51545	0.00140348		-1.51923	0.000678688		-1.51458	0.000659951		-1.51035	0.00192459		-1.51597	0.00165961		-1.51243	0.00154985		-1.51326	0.0012924		-1.51131	0.0013202		-1.51286	0.000636823		-1.51843	0.00140856		-1.51212	0.00438091		-1.51835	0.00128174		-1.51319	0.00116138		-1.51319	0.00362105
-1.50659	0.00368354		-1.50415	0.000599143		-1.50374	0.00116504		-1.51076	0.00172587		-1.51329	0.000367365		-1.5074	0.00105917		-1.50441	0.000833939		-1.51097	0.000888203		-1.5043	0.000922768		-1.50764	0.00115389		-1.50507	0.0010298		-1.50567	0.00107165		-1.51156	0.000874894		-1.50775	0.00528768		-1.51366	0.00162896		-1.50788	0.00117347		-1.50788	0.00313563
-1.50221	0.00319628		-1.49821	0.000696995		-1.49999	0.00123306		-1.50389	0.00179558		-1.50517	0.000226487		-1.5024	0.000798439		-1.49629	0.00137655		-1.50316	0.000781159		-1.49805	0.00130104		-1.49983	0.00125394		-1.50069	0.00119155		-1.50098	0.000823388		-1.50375	0.000604167		-1.50212	0.0069434		-1.50678	0.000802243		-1.5035	0.00143306		-1.49975	0.00353111
-1.49471	0.00295069		-1.49415	0.00130186		-1.4953	0.000939585		-1.49607	0.00103772		-1.49861	0.000925659		-1.49802	0.000488976		-1.48973	0.00098115		-1.49566	0.00105332		-1.49399	0.00168057		-1.49358	0.000964101		-1.49538	0.00121159		-1.49629	0.000432122		-1.49812	0.000918956		-1.49431	0.00455098		-1.49897	0.000624515		-1.49694	0.00224056		-1.49288	0.0027381
-1.4869	0.002964		-1.4879	0.00100495		-1.4878	0.00113845		-1.49045	0.000766156		-1.49454	0.000972618		-1.49115	0.00100898		-1.48598	0.000688019		-1.49097	0.00157792		-1.48805	0.00181149		-1.48921	0.00111606		-1.48725	0.00100976		-1.48942	0		-1.49406	0.00148275		-1.48743	0.00469898		-1.49335	0.00101741		-1.48881	0.00216803		-1.48913	0.00291364
-1.48253	0.00321812		-1.47946	0.00131587		-1.48093	0.00135947		-1.48639	0.00103793		-1.48923	0.000610858		-1.48302	0.000904856		-1.48098	0.00123089		-1.4866	0.000988962		-1.47993	0.00215425		-1.48389	0.00115705		-1.48038	0.00125651		-1.48161	0.00101662		-1.48749	0.00101794		-1.48306	0.0069761		-1.48928	0.00134797		-1.48319	0.00140436		-1.48444	0.00290334
-1.47878	0.00268598		-1.47352	0.00116929		-1.47624	0.00151343		-1.47982	0.000922167		-1.48142	0.00101069		-1.4774	0.00118079		-1.47348	0.00125775		-1.4791	0.000559921		-1.47368	0.00231165		-1.47639	0.00066186		-1.47631	0.000924351		-1.47598	0.00147126		-1.47937	0.000983513		-1.47806	0.00463765		-1.48272	0.000626983		-1.47912	0.00129073		-1.47694	0.00328279
-1.4719	0.00354154		-1.47009	0.000722838		-1.47124	0.00137277		-1.4717	0.00124996		-1.47423	0.00125592		-1.47334	0.00139071		-1.46691	0.00117407		-1.4716	0.0011634		-1.46993	0.00181464		-1.4692	0.00166232		-1.471	0.00102242		-1.47192	0.00118276		-1.47343	0.00155284		-1.46993	0.00506528		-1.4746	0.000676558		-1.47287	0.00123905		-1.47007	0.0026802
-1.4644	0.00355519		-1.46477	0.000797016		-1.46405	0.00112939		-1.46576	0.00137651		-1.46986	0.00118577		-1.46708	0.000966915		-1.46223	0.000796749		-1.4666	0.000427308		-1.46492	0.00172491		-1.46452	0.00210517		-1.46288	0.00128266		-1.46535	0.000575955		-1.46968	0.000939655		-1.46275	0.00604563		-1.46866	0.000648377		-1.46443	0.00114718		-1.46538	0.00346863
-1.45909	0.0040544		-1.45696	0.00112529		-1.45655	0.00111494		-1.46201	0.000902873		-1.46485	0.00104586		-1.45896	0.00124472		-1.45723	0.00107568		-1.46223	0.00058679		-1.45711	0.00194115		-1.45983	0.00216403		-1.456	0.00112196		-1.45723	0.00110605		-1.46312	0.00135978		-1.45899	0.00460086		-1.4646	0.00113507		-1.45881	0.00171925		-1.46069	0.00468228
-1.45471	0.00375453		-1.45071	0.00119474		-1.45124	0.00137257		-1.45545	0.000110992		-1.45704	0.000630762		-1.45302	0.000895068		-1.45004	0.00103332		-1.45503	0.00135083		-1.45055	0.00159357		-1.45233	0.0015566		-1.45225	0.00078959		-1.45129	0.00135098		-1.455	0.000892519		-1.45431	0.00742499		-1.45835	0.00118608		-1.45537	0.00102116		-1.4535	0.00361601
-1.44815	0.00372381		-1.44634	0.0011541		-1.44687	0.000942475		-1.44733	0.000591888		-1.44954	0.000604287		-1.44896	0.0013476		-1.44223	0.00122211		-1.44691	0.000879535		-1.44586	0.0016047		-1.44451	0.00082349		-1.44756	0.00113461		-1.44754	0.000700609		-1.44906	0.00111406		-1.44712	0.00829332		-1.45022	0.000975651		-1.44944	0.00197281		-1.446	0.00361853
-1.44034	0.00394483		-1.44102	0.00124603		-1.4403	0.000854799		-1.4417	0.00116075		-1.44548	0.00130249		-1.44271	0.000963167		-1.43723	0.00185331		-1.44222	0.00134411		-1.44118	0.00128107		-1.43952	0.000747404		-1.44006	0.00136934		-1.44098	0.0011171		-1.44562	0.000567892		-1.43994	0.00640621		-1.44428	0.000459747		-1.44162	0.00222454		-1.44038	0.00418725
-1.43409	0.00314593		-1.43352	0.00119296		-1.43218	0.000416416		-1.43795	0.000930051		-1.44111	0.000558294		-1.43427	0.000700352		-1.43285	0.00204288		-1.43848	0.00146459		-1.43367	0.00156246		-1.43514	0.00117302		-1.43319	0.000975177		-1.43254	0.00070457		-1.44	4.98007e-05		-1.43524	0.00368265		-1.44054	0.000948086		-1.43569	0.00133485		-1.43632	0.00370321
-1.43003	0.00319338		-1.42602	0.00146106		-1.42655	0.00111513		-1.43233	0.000892915		-1.43392	0.000819372		-1.42833	0.000852585		-1.42629	0.00153487		-1.43191	0.00108647		-1.42617	0.00127771		-1.42795	0.00130291		-1.42819	0.0015389		-1.42692	0.000910729		-1.43249	0.000822634		-1.43056	0.00494182		-1.43522	0.000528452		-1.43131	0.00145694		-1.42975	0.00318255
-1.42409	0.0029541		-1.42133	0.00101304		-1.4228	0.000821848		-1.42451	0.000959925		-1.42673	0.000760238		-1.4249	0.000790109		-1.41816	0.00206561		-1.42441	0.000751689		-1.42118	0.00131281		-1.42014	0.00109483		-1.4235	0.00174304		-1.42348	0.000744384		-1.42593	0.00107369		-1.42337	0.00420839		-1.42741	0.000908386		-1.42569	0.00124751		-1.42163	0.00284589
-1.41628	0.0031007		-1.41696	0.000679831		-1.41593	0.00107524		-1.41857	0.0013485		-1.42173	0.000994649		-1.41959	0.000760329		-1.41254	0.001992		-1.41879	0.000743022		-1.41649	0.00163581		-1.41545	0.00110618		-1.41663	0.00133665		-1.41785	0.00136203		-1.42156	0.00050395		-1.41556	0.00358944		-1.42085	0.00129038		-1.41819	0.00107102		-1.416	0.00333772
-1.40971	0.0035144		-1.40946	0.00121841		-1.4078	0.00124848		-1.4142	0.000977144		-1.41736	0.000986725		-1.41177	0.000801771		-1.40848	0.000829032		-1.41441	0.00065158		-1.40961	0.00176841		-1.4117	0.0013275		-1.40881	0.00108716		-1.41004	0.00156715		-1.41625	0.000525674		-1.40993	0.00518793		-1.41647	0.00112211		-1.411	0.000977035		-1.41194	0.00388058
-1.40565	0.00407624		-1.40165	0.00122433		-1.40218	0.000926289		-1.40858	0.000713668		-1.41048	0.000817247		-1.40521	0.00125618		-1.4016	0.000965913		-1.40847	0.00174672		-1.40149	0.00153725		-1.40514	0.00122304		-1.40319	0.000932576		-1.40411	0.0012899		-1.40843	0.000704178		-1.40587	0.00673327		-1.41116	0.000704122		-1.40631	0.00115292		-1.40538	0.00299557
-1.40003	0.00385079		-1.39665	0.0007039		-1.39874	0.000815296		-1.40108	0.000772795		-1.40267	0.000958898		-1.40083	0.000533334		-1.39348	0.00123115		-1.40035	0.0018594		-1.39618	0.00148429		-1.39733	0.00136176		-1.39913	0.00098762		-1.39973	0.00113669		-1.40124	0.000883296		-1.39931	0.00615274		-1.40366	0.000292304		-1.40162	0.00140133		-1.39725	0.00299237
-1.3919	0.003739		-1.39227	0.00108031		-1.3928	0.00118797		-1.39389	0.000712216		-1.39704	0.00102441		-1.39584	0.000325915		-1.38817	0.00117562		-1.3941	0.00161302		-1.39211	0.00137585		-1.39202	0.0011684		-1.39256	0.000892084		-1.3941	0.000975141		-1.39656	0.00135446		-1.39118	0.00486578		-1.39647	3.55866e-05		-1.39381	0.00168208		-1.39163	0.00276488
-1.38534	0.00333896		-1.38509	0.00145909		-1.38499	0.000943246		-1.3892	0.00101449		-1.39267	0.000686224		-1.38802	0.000398178		-1.38473	0.00051963		-1.38972	0.00111984		-1.38524	0.000633602		-1.38764	0.00129997		-1.38444	0.00153595		-1.3866	0.00106144		-1.39187	0.00099335		-1.38525	0.00703661		-1.39178	0.000366974		-1.38631	0.00169296		-1.38819	0.00390781
-1.38159	0.00302305		-1.37696	0.00142181		-1.37905	0.000662488		-1.38451	0.00180118		-1.38673	0.000543221		-1.38084	0.00100607		-1.37848	0.000595302		-1.38441	0.000842698		-1.37711	0.00141662		-1.38139	0.000786498		-1.3785	0.00118987		-1.37942	0.000801917		-1.38437	0.000493498		-1.38149	0.00562863		-1.3871	0.00139117		-1.38163	0.00135026		-1.38257	0.0034954
-1.3769	0.00330858		-1.37227	0.000889541		-1.37499	0.000902202		-1.37701	0.00192317		-1.37861	0.000712893		-1.37615	0.00154586		-1.37098	0.000368803		-1.3766	0.00069145		-1.37211	0.00141389		-1.37357	0.000757073		-1.37475	0.00133475		-1.37473	0.000977226		-1.37687	0.000953386		-1.37525	0.00435393		-1.37991	0.00170384		-1.37725	0.000809008		-1.37475	0.00361167
-1.36909	0.00395302		-1.36884	0.00132593		-1.36937	0.00132748		-1.36951	0.00107154		-1.37267	0.000668059		-1.37146	0.00074471		-1.36504	0.000764982		-1.36972	0.000817129		-1.36836	0.00239949		-1.36733	0.000735634		-1.3685	0.00169644		-1.37004	0.00151774		-1.37187	0.00112451		-1.36681	0.00298766		-1.3721	0.000875267		-1.36943	0.000564522		-1.3685	0.00365309
-1.36253	0.00418462		-1.36196	0.00105664		-1.36155	0.00127834		-1.36451	0.00112133		-1.36861	0.000253155		-1.36427	0.000866121		-1.36098	0.00118673		-1.36535	0.000700551		-1.36211	0.0017785		-1.36295	0.00131973		-1.36007	0.0017926		-1.36254	0.000849027		-1.3675	0.00117575		-1.36118	0.00260991		-1.3671	0.00103818		-1.36162	0.000593534		-1.36413	0.00280905
-1.35784	0.00419469		-1.35446	0.000966678		-1.35437	0.000801422		-1.36014	0.00107984		-1.36236	0.000689703		-1.35646	0.00114289		-1.35504	0.00101085		-1.36035	0.00106264		-1.35461	0.00124787		-1.35732	0.00114191		-1.35444	0.00111669		-1.35504	0.000517796		-1.36	0.0012608		-1.35774	0.00433513		-1.36272	0.000833098		-1.35756	0.00077365		-1.35882	0.00336701
-1.35315	0.00425613		-1.34915	0.00117146		-1.34999	0.000653817		-1.35264	0.00131676		-1.35423	0.000973198		-1.35177	0.00124243		-1.34723	0.00144577		-1.35222	0.000604775		-1.34868	0.00109341		-1.34951	0.000879188		-1.35069	0.000959571		-1.35004	0.000377508		-1.35187	0.00145898		-1.35212	0.00638168		-1.35554	0.000722635		-1.3535	0.00192083		-1.35132	0.00304111
-1.34596	0.00494972		-1.34477	0.00115548		-1.34499	0.000946715		-1.34514	0.00143626		-1.34798	0.000706902		-1.3474	0.00109749		-1.34035	0.000557337		-1.34504	0.00160219		-1.34461	0.00119996		-1.34264	0.000572113		-1.34507	0.000655249		-1.34566	0.000907811		-1.34718	0.000766685		-1.34431	0.0044357		-1.34741	0.000568769		-1.34662	0.00175371		-1.34413	0.00350959
-1.33815	0.00460395		-1.33852	0.000928011		-1.33749	0.00055612		-1.34045	0.00132983		-1.34454	0.000837924		-1.3399	0.000984825		-1.33598	0.000736315		-1.34129	0.00212311		-1.33868	0.0012981		-1.33858	0.000815503		-1.33725	0.000671699		-1.33817	0.00103142		-1.34343	0.000686963		-1.33806	0.00412009		-1.34272	0.000773444		-1.33912	0.000607133		-1.33944	0.003784
-1.33315	0.00407556		-1.3304	0.00103316		-1.32999	0.000377491		-1.3367	0.00147547		-1.33923	0.00073473		-1.33209	0.000904023		-1.33098	0.00109763		-1.33691	0.00130186		-1.33055	0.00117222		-1.33326	0.0014368		-1.331	0.000505093		-1.33035	0.000448382		-1.33687	0.00112328		-1.33368	0.00496144		-1.33897	0.000949115		-1.33381	0.000601996		-1.33444	0.00360091
-1.32878	0.00346354		-1.32415	0.000846534		-1.3253	0.000850945		-1.32983	0.000855157		-1.33173	0.00101571		-1.3274	0.000672238		-1.32316	0.00122366		-1.32941	0.000952992		-1.32399	0.00114637		-1.32514	0.0010261		-1.32663	0.00102938		-1.32567	0.000691854		-1.32937	0.00136204		-1.32837	0.00508572		-1.33241	0.000798334		-1.32943	0.00157571		-1.32725	0.00366202
-1.3219	0.00403102		-1.31977	0.000962733		-1.32062	0.00110145		-1.32233	0.000649562		-1.32517	0.0011649		-1.32396	0.00129491		-1.31598	0.00108136		-1.32254	0.000836414		-1.31961	0.00153956		-1.31826	0.000919963		-1.32132	0.00118206		-1.32191	0.000853197		-1.32406	0.00110955		-1.32087	0.00557467		-1.3246	0.000690957		-1.32287	0.00148323		-1.31975	0.00407076
-1.31378	0.00394534		-1.31446	0.000823452		-1.31312	0.000992191		-1.31701	0.000886484		-1.32079	0.000891261		-1.31709	0.00161916		-1.31129	0.00197263		-1.31754	0.00139395		-1.3143	0.00179699		-1.3142	0.000927109		-1.3135	0.000762384		-1.31504	0.000757725		-1.31968	0.00126531		-1.31337	0.00655257		-1.31928	0.00076789		-1.31506	0.00228378		-1.31475	0.00426919
-1.30846	0.0032596		-1.30634	0.00115607		-1.30562	0.000645724		-1.31264	0.0011149		-1.31548	0.000985373		-1.30959	0.00115788		-1.3066	0.000837813		-1.31285	0.0019062		-1.30649	0.00142355		-1.30982	0.000815923		-1.30631	0.00112913		-1.30754	0.00122466		-1.31312	0.00144791		-1.30868	0.00669402		-1.31491	0.00123216		-1.30912	0.00289393		-1.31038	0.00336861
-1.3044	0.00314934		-1.29946	0.000891514		-1.30124	0.000427978		-1.30607	0.000938972		-1.30798	0.000541288		-1.30427	0.000295718		-1.29879	0.000727275		-1.30598	0.00164423		-1.2993	0.000914362		-1.30232	0.00117113		-1.30194	0.00142059		-1.30223	0.0018496		-1.305	0.000636752		-1.30399	0.00645609		-1.30897	0.0012227		-1.30506	0.00225446		-1.30288	0.00325853
-1.29753	0.00349546		-1.2954	0.00130758		-1.29718	0.000495228		-1.29826	0.000926524		-1.30048	0.000467081		-1.2999	0.000454198		-1.29129	0.000846077		-1.29816	0.0015166		-1.29492	0.00197142		-1.29545	0.000915339		-1.29694	0.00141595		-1.29816	0.001746		-1.29875	0.000607036		-1.29649	0.00332044		-1.30085	0.000345787		-1.29912	0.00159626		-1.29507	0.00295277
-1.2894	0.00374924		-1.29009	0.00110517		-1.2903	0.000245302		-1.29201	0.00165637		-1.29579	0		-1.29365	0.000570611		-1.28692	0.000877328		-1.29285	0.000795894		-1.28993	0.00247178		-1.29077	0.00075371		-1.28944	0.00160006		-1.2916	0.00109		-1.29437	0.000996834		-1.289	0.0047325		-1.2946	0.000522486		-1.291	0.000653371		-1.29069	0.00354781
-1.28409	0.00330977		-1.28196	0.00130837		-1.28312	0.000851716		-1.28795	0.00185886		-1.2911	0.000711154		-1.28552	0.00066849		-1.28285	0.000923299		-1.28847	0.0010232		-1.28211	0.00202753		-1.28608	0.0010343		-1.28194	0.00116815		-1.28348	0.000972223		-1.28874	0.00116714		-1.284	0.0050939		-1.29022	0.000553547		-1.28443	0.000974617		-1.28694	0.0044921
-1.28065	0.0038781		-1.27477	0.00137722		-1.2778	0.000543595		-1.28232	0.00224826		-1.28423	0.000885657		-1.27927	0.00114435		-1.27598	0.0019623		-1.28191	0.00109687		-1.27493	0.00190606		-1.27889	0.000751608		-1.27725	0.000927093		-1.27754	0.000938037		-1.28093	0.000901126		-1.27962	0.00424028		-1.2846	0.00100959		-1.28038	0.00136477		-1.28007	0.00374555
-1.2744	0.00385045		-1.27102	0.000679831		-1.27343	0.000807203		-1.2742	0.00222544		-1.27642	0.000897831		-1.27521	0.00128179		-1.26848	0.0013812		-1.2741	0.00111074		-1.27055	0.00192791		-1.27107	0.000691496		-1.27256	0.00127465		-1.27348	0.000798582		-1.27406	0.000728361		-1.27212	0.00456161		-1.27679	0.00121324		-1.27475	0.00178		-1.27257	0.00404627
-1.26659	0.00384499		-1.26665	0.00100061		-1.26687	0.000946329		-1.26764	0.00129933		-1.27111	0.000602548		-1.26959	0.00134802		-1.26348	0.000632234		-1.26816	0.00117185		-1.26649	0.00179048		-1.26576	0.000910505		-1.26506	0.000431912		-1.26785	0.000530512		-1.27	0.00102614		-1.26431	0.00655747		-1.26991	0.000442673		-1.26631	0.0019852		-1.26725	0.00336244
-1.26065	0.00409877		-1.25915	0.00124346		-1.25874	0.00078196		-1.26358	0.00127942		-1.26704	0.000748257		-1.26177	0.00147193		-1.2591	0.000473659		-1.2641	0.000575089		-1.2593	0.00188294		-1.26171	0.000990163		-1.25725	0.00108969		-1.25973	0.000745427		-1.26468	0.000554571		-1.25962	0.00788532		-1.26585	0.000186161		-1.25975	0.00123814		-1.26288	0.00294362
-1.25659	0.00340296		-1.25227	0.000972399		-1.25312	0.000932841		-1.25795	0.00168915		-1.25985	0.000530466		-1.2549	0.001176		-1.25223	0.000772214		-1.25785	0.000795243		-1.25211	0.00160533		-1.25514	0.000978814		-1.25288	0.00125651		-1.25285	0.00136682		-1.25656	0.000935966		-1.25587	0.00503176		-1.26053	0.000959811		-1.25631	0.00158296		-1.25632	0.00382748
-1.25096	0.00351474		-1.24759	0.00122235		-1.24874	0.000960781		-1.24982	0.0011261		-1.25173	0.00100914		-1.25052	0.000904856		-1.24441	0.000396696		-1.24941	0.000646596		-1.24711	0.0017474		-1.24702	0.00119467		-1.24913	0.00074973		-1.24879	0.000818385		-1.24968	0.0010868		-1.24931	0.00529994		-1.25241	0.00119946		-1.25131	0.00159323		-1.2485	0.00416963
-1.24315	0.00396975		-1.2429	0.000871194		-1.2428	0.000815681		-1.24295	0.00142962		-1.24673	0.0011649		-1.24552	0.000816974		-1.23879	4.70042e-05		-1.24379	0.000948658		-1.24274	0.00158768		-1.24108	0.00101055		-1.24225	0.000441824		-1.24348	0.00130971		-1.24593	0.000930433		-1.24181	0.00759588		-1.24522	0.000958577		-1.24381	0.000916593		-1.24225	0.00419709
-1.23596	0.00397043		-1.23571	0.00122452		-1.23468	0.00124809		-1.23951	0.00115141		-1.24329	0.000597523		-1.2374	0.00107791		-1.23441	0.000808629		-1.24035	0.000996113		-1.23586	0.00197961		-1.23733	0.00101181		-1.23475	0.00110467		-1.23504	0.00140706		-1.24124	0.000688602		-1.2365	0.00798426		-1.24147	0.00115955		-1.23693	0.000877004		-1.23819	0.00354873
-1.23159	0.00383116		-1.2279	0.00154925		-1.22843	0.000791016		-1.23451	0.00157173		-1.23673	0.000385724		-1.23021	0.00086029		-1.22848	0.00105656		-1.23472	0.00118896		-1.22774	0.00180456		-1.23077	0.00101875		-1.22944	0.00113883		-1.22816	0.00100453		-1.23374	0.00071381		-1.23212	0.00809382		-1.23678	0.000138438		-1.23225	0.00122001		-1.23225	0.00376455
-1.22659	0.00349		-1.22258	0.00093827		-1.22437	0.000951725		-1.22701	0.00148646		-1.22892	0.000714245		-1.22646	0.00111228		-1.22035	0.000551913		-1.22691	0.00134368		-1.22211	0.00128402		-1.22233	0.000611417		-1.22506	0.00120041		-1.22473	0.00131283		-1.22687	0.00061011		-1.22556	0.00651332		-1.22928	8.55726e-05		-1.22724	0.00100877		-1.22444	0.00373434
-1.21878	0.00361032		-1.21821	0.00139182		-1.21874	0.00105713		-1.22014	0.00139248		-1.22361	0.00058245		-1.22177	0.000827595		-1.21379	0.000250001		-1.22066	0.00108972		-1.21805	0.00198192		-1.2167	0.00034743		-1.2185	0.000431701		-1.21973	0.00109646		-1.22218	0.000731435		-1.21774	0.00519038		-1.22241	0.000300121		-1.22006	0.00179873		-1.21757	0.0030727
-1.21159	0.00279657		-1.21165	0.00180355		-1.2103	0.0012901		-1.21576	0.00117527		-1.21923	0.000928364		-1.21427	0.00102356		-1.21004	0.00154959		-1.21629	0.00187131		-1.2118	0.00129263		-1.21327	0.000656606		-1.21069	0.000897567		-1.21223	0.00151441		-1.21749	0.00143643		-1.2115	0.00725737		-1.21741	0.000747526		-1.21256	0.0018758		-1.2135	0.00313289
-1.2069	0.00273872		-1.20352	0.00116475		-1.20374	0.00053396		-1.21076	0.00123896		-1.21298	0.00105436		-1.2074	0.00110915		-1.2041	0.00169138		-1.21066	0.00133761		-1.20368	0.0015259		-1.20764	0.00112237		-1.20444	0.00135268		-1.20535	0.00183167		-1.21031	0.00122842		-1.20743	0.0037129		-1.21272	0.000480317		-1.20725	0.00106467		-1.20788	0.00351898
-1.20221	0.00358523		-1.1979	0.00102113		-1.2003	0.00060468		-1.20357	0.00187836		-1.20517	0.000834253		-1.20271	0.000362984		-1.19566	0.000523246		-1.20316	0.00107824		-1.19742	0.00201008		-1.19983	0.00105259		-1.20038	0.00125651		-1.20067	0.00124071		-1.20249	0.000743321		-1.20149	0.00534246		-1.20585	0.000667301		-1.20288	0.00111303		-1.19975	0.00437126
-1.19471	0.00298755		-1.19384	0.00159877		-1.1953	0.000563635		-1.19576	0.00150617		-1.19892	0.000456839		-1.19802	0.000311754		-1.18941	0.000103564		-1.19597	0.00151876		-1.19336	0.0016129		-1.19357	0.000683509		-1.19475	0.000359154		-1.19598	0.00132305		-1.19718	0.000720368		-1.19368	0.00352321		-1.19803	0.00047826		-1.19599	0.000887883		-1.19319	0.00300999
-1.1869	0.00263034		-1.18727	0.00131409		-1.1878	0.000912415		-1.19076	0.00120556		-1.19454	0.000404082		-1.19115	0.000905689		-1.18598	0.000662451		-1.19129	0.00151205		-1.18742	0.000863506		-1.1892	0.00101581		-1.18663	0.000848851		-1.18879	0.0014698		-1.19281	0.00059269		-1.18681	0.00435393		-1.19272	0.00026906		-1.18787	0.00141916		-1.18944	0.0033114
-1.18284	0.00314081		-1.17915	0.00124761		-1.18093	0.00129916		-1.18638	0.000923827		-1.18892	0.000185712		-1.18333	0.000862373		-1.18066	0.000676139		-1.18629	0.000728937		-1.1793	0.00104886		-1.18389	0.00112804		-1.17975	0.000870362		-1.18098	0.000993902		-1.18624	0.00103413		-1.18274	0.00304816		-1.18835	0.000451518		-1.18256	0.00111484		-1.18475	0.00346199
-1.17878	0.00418923		-1.17352	0.000899405		-1.17624	0.00119279		-1.17951	0.00138024		-1.18111	0.000584962		-1.17771	0.00113143		-1.17317	0.000767823		-1.1791	0.000702068		-1.17305	0.00138762		-1.17608	0.00122767		-1.17569	0.000763649		-1.17598	0.000998488		-1.17812	0.00116202		-1.17712	0.00473414		-1.18178	0.000911882		-1.1785	0.00144818		-1.17725	0.00336541
-1.1719	0.00442731		-1.16977	0.000978515		-1.17124	0.00126486		-1.17139	0.00119249		-1.17423	0.000576266		-1.17334	0.00101127		-1.1666	0.00120868		-1.1716	0.00121085		-1.16961	0.00178039		-1.16889	0.00139644		-1.17006	0.000604213		-1.17161	0.000893219		-1.1725	0.00114193		-1.16899	0.00641929		-1.17366	0.000675118		-1.17163	0.00139045		-1.17038	0.00337731
-1.1644	0.00369804		-1.16415	0.00103237		-1.16405	0.00116388		-1.16608	0.0012207		-1.16985	0.000124452		-1.16677	0.000482104		-1.16192	0.00189593		-1.1666	0.000929156		-1.1643	0.00192035		-1.16451	0.0010839		-1.16194	0.00136132		-1.16504	0.00127719		-1.16843	0.0009042		-1.16243	0.00584367		-1.16772	0.000293333		-1.1635	0.00133364		-1.16569	0.00333703
-1.1594	0.00335244		-1.15633	0.00112845		-1.15655	0.000780225		-1.16201	0.00101449		-1.16454	0.000731638		-1.15896	0.00103314		-1.15691	0.00185073		-1.16222	0.000973144		-1.15649	0.00199264		-1.15952	0.000783135		-1.15538	0.00133096		-1.15691	0.00114878		-1.16187	0.000552726		-1.15869	0.00740373		-1.16366	0.00074732		-1.15818	0.000668481		-1.161	0.00314616
-1.15471	0.00396002		-1.15009	0.00126753		-1.15155	0.00146314		-1.15513	0.00116344		-1.15673	0.000480029		-1.15302	0.00092818		-1.14973	0.00141994		-1.15472	0.000996763		-1.15024	0.0016377		-1.15202	0.000896423		-1.15163	0.00169833		-1.15129	0.000660586		-1.15375	0.000386109		-1.15399	0.00644709		-1.1571	0.00101021		-1.15475	0.000612271		-1.15382	0.00348236
-1.14815	0.00377843		-1.14571	0.000765846		-1.14687	0.000908175		-1.14701	0.000941461		-1.14954	0.000712893		-1.14896	0.00100357		-1.14223	0.000896181		-1.14691	0.00145896		-1.14586	0.000888934		-1.14452	0.000851444		-1.14694	0.00150009		-1.14723	0.00094033		-1.14812	0.00067815		-1.14649	0.00502113		-1.14897	0.000997044		-1.1485	0.000739802		-1.146	0.00343819
-1.14034	0.00316726		-1.1404	0.00100949		-1.13999	0.0006569		-1.14139	0.00119664		-1.14548	0.000889715		-1.1424	0.00048856		-1.13723	0.00139386		-1.14223	0.00127066		-1.14055	0.000985602		-1.13983	0.000849973		-1.13944	0.00137271		-1.14036	0.00114378		-1.14468	0.00147886		-1.13931	0.00514541		-1.14335	0.000831247		-1.14099	0.000485344		-1.14069	0.00317317
-1.1344	0.00302988		-1.13258	0.000353528		-1.13218	0.000484052		-1.13795	0.00131012		-1.14111	0.000642744		-1.13427	0.000417754		-1.13254	0.00140367		-1.13848	0.000685166		-1.13305	0.00141452		-1.13514	0.000958636		-1.13225	0.0007143		-1.13223	0.00129303		-1.13875	0.00156309		-1.13493	0.00795155		-1.1396	0.00071091		-1.13506	0.00121064		-1.13632	0.00247583
-1.13034	0.00342992		-1.1254	0.000146383		-1.12687	0.000434144		-1.13201	0.00163376		-1.13392	0.00127467		-1.12896	0.000723885		-1.12566	0.00076085		-1.13191	0.000195886		-1.12555	0.00228181		-1.12795	0.000910505		-1.12756	0.000513528		-1.1266	0.000966178		-1.13093	0.00108844		-1.13024	0.00586248		-1.13397	0.000760279		-1.13069	0.000566033		-1.12975	0.00332124
-1.1244	0.00261106		-1.12102	0.000679831		-1.1228	0.000543788		-1.1242	0.00112112		-1.12673	0.00140008		-1.12521	0.00106417		-1.11785	0.000801914		-1.12441	0.000699467		-1.12086	0.00225154		-1.12014	0.000710623		-1.12288	0.000842102		-1.12317	0.00123279		-1.125	0.00128724		-1.12274	0.00631627		-1.12616	0.000615053		-1.12506	0.00148504		-1.12163	0.0035842
-1.11628	0.00291211		-1.11633	0.00110261		-1.11593	0.000884474		-1.11826	0.000820511		-1.12204	0.000721975		-1.11958	0.00143069		-1.11254	0.000550364		-1.11879	0.000747139		-1.11618	0.00157591		-1.11545	0.00091639		-1.11569	0.000658835		-1.11723	0.00102309		-1.12062	0.00125117		-1.11493	0.00668421		-1.11991	0.00101227		-1.11725	0.00211484		-1.11632	0.00408655
-1.10971	0.00350587		-1.10852	0.00101107		-1.1078	0.000862121		-1.1142	0.00136821		-1.11735	0.000257213		-1.11177	0.00114226		-1.10816	0.000516789		-1.11441	0.000957759		-1.10899	0.0016398		-1.1117	0.00160095		-1.10819	0.000760064		-1.10942	0.00118797		-1.115	0.00117841		-1.10993	0.00498924		-1.11553	0.000970302		-1.11037	0.00166365		-1.11225	0.00433029
-1.10565	0.0037774		-1.10102	0.00108584		-1.10249	0.000845549		-1.10857	0.00106428		-1.11017	0.000406015		-1.10584	0.000766368		-1.10129	0.00135202		-1.10816	0.000737605		-1.10118	0.00116444		-1.10483	0.00128904		-1.10288	0.000700803		-1.10348	0.00108458		-1.10718	0.00099376		-1.10555	0.00368102		-1.11022	0.000913528		-1.106	0.00118858		-1.10538	0.00367186
-1.10003	0.00352413		-1.09634	0		-1.09905	0.000798339		-1.10076	0.000325922		-1.10267	0.000605253		-1.10146	0.000941508		-1.09317	0.00174381		-1.10035	0.000976394		-1.09586	0.00125754		-1.09733	0.000682038		-1.0985	0.00120273		-1.09942	0.00124863		-1.1	0.000736558		-1.09899	0.00325993		-1.10241	0.00088041		-1.10069	0.000857059		-1.09725	0.00349037
-1.0919	0.00365742		-1.09196	0.00070528		-1.0928	0.000930143		-1.09357	0.00101469		-1.09704	0.000891261		-1.09583	0.000814891		-1.08816	0.00213405		-1.0941	0.00121757		-1.0918	0.00161353		-1.09201	0.000954222		-1.09163	0.00160702		-1.0938	0.0010556		-1.09562	0.000482636		-1.09087	0.00354038		-1.09522	0.00132843		-1.09288	0.00121366		-1.09163	0.00309352
-1.08534	0.00325942		-1.08446	0.000820887		-1.08499	0.000620095		-1.0892	0.0012846		-1.09298	0.000919475		-1.08833	0.000122244		-1.08441	0.00158394		-1.08972	0.0012349		-1.08461	0.00163139		-1.08764	0.00139014		-1.08381	0.00103275		-1.08598	0.000758768		-1.09062	0.00029655		-1.08524	0.00416342		-1.09085	0.000896455		-1.08569	0.00137323		-1.08819	0.00329607
-1.0819	0.00295751		-1.07665	0.000661089		-1.07905	0.000399651		-1.0842	0.00052799		-1.08642	0.000740527		-1.08115	0.000674946		-1.07816	0.00173115		-1.0841	0.00184228		-1.07649	0.00132962		-1.08108	0.00168712		-1.07788	0.00129173		-1.0791	0.00124801		-1.08281	0.000411317		-1.08118	0.00532038		-1.08585	0.000501299		-1.081	0.00150136		-1.08225	0.00290906
-1.07659	0.00293259		-1.07196	0.00183807		-1.07468	0.000660561		-1.0767	0.0011234		-1.07829	0.00101011		-1.07646	0.000853001		-1.07035	0.00129701		-1.07628	0.00119698		-1.0718	0.00109488		-1.07327	0.001573		-1.07381	0.00116793		-1.07473	0.00137516		-1.07531	0.0004687		-1.07462	0.00524925		-1.07835	0.000581729		-1.07631	0.00103445		-1.07444	0.00333085
-1.06909	0.00284692		-1.06821	0.00142595		-1.06905	0.00140437		-1.0692	0.00128626		-1.07235	0.00124742		-1.07146	0.000791983		-1.06473	0.00109246		-1.06941	0.00110857		-1.06805	0.00222212		-1.06733	0.00130691		-1.06725	0.00153004		-1.06973	0.00177393		-1.07062	0.00135876		-1.06649	0.00363032		-1.07085	0.00115873		-1.06881	0.00172741		-1.0685	0.00318896
-1.06253	0.00357141		-1.06134	0.000917358		-1.06124	0.00138317		-1.06451	0.00140016		-1.0686	0.000258759		-1.06396	0.000628922		-1.06035	0.000756201		-1.06535	0.000933273		-1.06149	0.00133067		-1.06326	0.00106268		-1.05913	0.00133201		-1.06192	0.00150274		-1.06625	0.00123969		-1.06087	0.00460904		-1.06585	0.00129819		-1.06131	0.0022188		-1.06444	0.00293263
-1.05784	0.00337446		-1.05383	0.000964113		-1.05437	0.00058329		-1.05982	0.000974655		-1.06235	0.000549598		-1.05646	0.000677861		-1.05442	0.000542616		-1.06004	0.000790476		-1.05399	0.0011119		-1.05733	0.0011995		-1.0535	0.000981714		-1.05442	0.00102559		-1.05843	0.00118804		-1.05712	0.00417078		-1.06147	0.00102132		-1.05693	0.00202267		-1.05882	0.00341439
-1.05284	0.00356663		-1.04852	0.00134388		-1.04999	0.000528565		-1.05233	0.000885239		-1.05392	0.000736082		-1.05177	0.000985241		-1.0466	0.000310177		-1.05191	0.000833814		-1.04836	0.00146222		-1.0492	0.000992896		-1.05006	0.000683931		-1.04973	0.001085		-1.05093	0.00134318		-1.05149	0.00398763		-1.05397	0.000108611		-1.05287	0.00117558		-1.051	0.00398654
-1.04565	0.00317529		-1.04415	0.0011752		-1.04468	0.00104692		-1.04451	0.00142402		-1.04798	0.000816667		-1.0474	0.0006864		-1.04004	0.000373452		-1.04503	0.00111551		-1.04399	0.00164295		-1.04296	0.00108538		-1.04413	0.00152414		-1.04504	0.00100078		-1.04656	0.00136081		-1.04399	0.00587556		-1.04616	2.11874e-05		-1.04569	0.000624057		-1.04382	0.00409067
-1.03784	0.00342258		-1.03759	0.000407583		-1.03718	0.00106503		-1.04045	0.00120328		-1.04454	0.000716951		-1.0399	0.000692855		-1.03566	0.000676655		-1.04129	0.00118506		-1.03805	0.000635913		-1.03858	0.00155723		-1.03662	0.0015176		-1.03754	0.000822554		-1.04249	0.000899282		-1.03806	0.00462375		-1.04178	0.000919699		-1.0385	0.00163736		-1.03944	0.00417787
-1.03284	0.00318501		-1.02977	0.000875139		-1.02999	0.000714323		-1.03639	0.00105515		-1.03923	0.000767002		-1.03209	0.000905897		-1.03035	0.000798298		-1.0366	0.000973577		-1.02993	0.000975305		-1.03295	0.000957375		-1.03069	0.001173		-1.02973	0.000952837		-1.03562	0.000878173		-1.03369	0.00536045		-1.03803	0.000681495		-1.03318	0.00160683		-1.03444	0.0044921
-1.02846	0.00304012		-1.02352	0.0010379		-1.02562	0.000425087		-1.02951	0.00126282		-1.03142	0.000642357		-1.02771	0.000704726		-1.02254	0.000733216		-1.0291	0.00153328		-1.02367	0.0017102		-1.02483	0.000850603		-1.02631	0.00129742		-1.02535	0.000961175		-1.02812	0.00111263		-1.02805	0.00618953		-1.03116	0.000465918		-1.02881	0.00112119		-1.02694	0.00457815
-1.02159	0.00284846		-1.01946	0.000837854		-1.02062	0.000116774		-1.02201	0.00118876		-1.02486	0.000859182		-1.02396	0.000443577		-1.01535	0.00113792		-1.02191	0.00158052		-1.0193	0.00136934		-1.01827	0.00107592		-1.02069	0.00123205		-1.02161	0.000980353		-1.02281	0.000716064		-1.02024	0.00412499		-1.02366	0.00120748		-1.02225	0.001903		-1.01944	0.00469121
-1.01346	0.00281944		-1.01352	0.00033814		-1.0128	0.000873298		-1.01701	0.00168314		-1.02048	0.00207027		-1.01709	0.00120162		-1.01098	0.00167046		-1.01753	0.000981811		-1.01399	0.00105621		-1.01451	0.000836731		-1.01288	0.00146382		-1.01473	0.00157298		-1.01843	0.00140692		-1.01306	0.00430079		-1.01835	0.00128194		-1.01412	0.00123028		-1.01475	0.00397212
-1.00815	0.00278684		-1.00571	0.00130442		-1.0053	0.00108989		-1.01232	0.00124975		-1.01517	0.00115872		-1.00959	0.00146235		-1.00598	0.00165832		-1.01285	0.000796544		-1.00617	0.00111064		-1.00983	0.00128063		-1.00569	0.00123901		-1.00723	0.00124613		-1.01187	0.000868336		-1.00868	0.00325339		-1.01397	0.000543468		-1.00818	0.00130432		-1.01007	0.0039323
-1.00409	0.00361612		-0.999146	0.00122926		-1.00124	0.0010105		-1.00576	0.00154704		-1.00767	0.000647575		-1.00427	0.00173724		-0.998164	0.000712038		-1.00566	0.000669781		-0.998988	0.00108774		-1.00233	0.00120413		-1.00132	0.00121897		-1.00191	0.00126698		-1.00375	0.000922645		-1.00368	0.00437846		-1.00741	0.000262683		-1.00412	0.00165368		-1.00257	0.00440788
-0.997215	0.00338333		-0.995087	0.00124346		-0.997178	0.001393		-0.99795	0.00165305		-1.00048	0.000417803		-0.999898	0.00135426		-0.990977	0.00081741		-0.997851	0.00158095		-0.994612	0.00157129		-0.995142	0.00134873		-0.996315	0.00122235		-0.997543	0.00107999		-0.997809	0.00106446		-0.996179	0.00564417		-0.999598	0.000607442		-0.997874	0.00171895		-0.994753	0.00455938
-0.989089	0.00318041		-0.98946	0.00110024		-0.98999	0.0011028		-0.992011	0.000801009		-0.995794	0.000618201		-0.993336	0.00168309		-0.986914	0.000972369		-0.992537	0.00157467		-0.989613	0.00131932		-0.990763	0.00183173		-0.988815	0.0010937		-0.990982	0.0014254		-0.993747	0.000423203		-0.988679	0.00284702		-0.993346	0.000469621		-0.989749	0.00176882		-0.990691	0.00415659
-0.984089	0.00310429		-0.981335	0.000231805		-0.982803	0.000173812		-0.987948	0.00153874		-0.990793	0.000729319		-0.985524	0.00123244		-0.982539	0.00118931		-0.988162	0.00115625		-0.981488	0.0018987		-0.985765	0.00119698		-0.981003	0.00101546		-0.983169	0.00162489		-0.987807	0.00119153		-0.983682	0.00370963		-0.989283	0.000737035		-0.983501	0.000583863		-0.986628	0.00287885
-0.98034	0.00310668		-0.974461	0.000541734		-0.97749	0.000277482		-0.982013	0.00102403		-0.983606	0.000603707		-0.979271	0.00104647		-0.975352	0.000895665		-0.9816	0.0013387		-0.974612	0.00147336		-0.978578	0.00150637		-0.976627	0.000961468		-0.977226	0.000575538		-0.979682	0.00189612		-0.97931	0.00646017		-0.983347	0.000340027		-0.979434	0.00116863		-0.979753	0.0028063
-0.974089	0.00316095		-0.970711	0.000955236		-0.973116	0.000492145		-0.973887	0.000986895		-0.976106	0.000459351		-0.975209	0.000596643		-0.968165	0.000721077		-0.973475	0.00196449		-0.970549	0.00175097		-0.970766	0.00211169		-0.971939	0.000832823		-0.973167	0.00116191		-0.973433	0.000785334		-0.971498	0.00799407		-0.975535	0.000250135		-0.973498	0.000806288		-0.972253	0.00392887
-0.966589	0.0039421		-0.966023	0.000736254		-0.966553	0.00103324		-0.967326	0.000428408		-0.971105	0.000273446		-0.969273	0.000109957		-0.963164	0.000760592		-0.967848	0.00237793		-0.965863	0.00244173		-0.965769	0.0019921		-0.964127	0.000923086		-0.967231	0.0013243		-0.969371	0.000781236		-0.963991	0.00566216		-0.968974	9.99718e-05		-0.965373	0.000679361		-0.967253	0.00386753
-0.960652	0.0039194		-0.95821	0.000563041		-0.958428	0.00109682		-0.963263	0.00062446		-0.96673	0.000691635		-0.961461	0.000152441		-0.958791	0.000780736		-0.963786	0.00123057		-0.958676	0.00214584		-0.961389	0.00171907		-0.956627	0.000774405		-0.959106	0.00102163		-0.963744	0.00125772		-0.959619	0.0056736		-0.964911	0.000398447		-0.959125	0.000431249		-0.962879	0.00358123
-0.956589	0.00341746		-0.951649	0.00074158		-0.952804	0.00149301		-0.957637	0.00159497		-0.95923	0.000903629		-0.954899	0.00103689		-0.951915	0.000771439		-0.957224	0.000483213		-0.9518	0.00146579		-0.954515	0.00163563		-0.952251	0.000453424		-0.952545	0.00139747		-0.95531	0.00112369		-0.95556	0.00545202		-0.959284	0.000689929		-0.955371	0.00202992		-0.956004	0.00311641
-0.950652	0.00319815		-0.946961	0.00101284		-0.948428	0.00118585		-0.949199	0.00182836		-0.951417	0.00098402		-0.950524	0.00143819		-0.944102	0.000950417		-0.949099	0.00120998		-0.946801	0.00172722		-0.946703	0.000810038		-0.948189	0.000444144		-0.948478	0.00107478		-0.948745	0.00135097		-0.948678	0.0078984		-0.951159	0.00105814		-0.950374	0.00132518		-0.948191	0.00357184
-0.942839	0.0026259		-0.94196	0.00162461		-0.942178	0.000633198		-0.942637	0.00139331		-0.946731	0.000858602		-0.944897	0.000725551		-0.938477	0.00148038		-0.943472	0.00254196		-0.942113	0.00209624		-0.94108	0.000431292		-0.941315	0.000657358		-0.942856	0.000978685		-0.945308	0.00146984		-0.941179	0.00611676		-0.944285	0.00148477		-0.942874	0.000866125		-0.942254	0.00310657
-0.936277	0.00376034		-0.934773	0.00153031		-0.934365	0.00103979		-0.9392	0.000797068		-0.942981	0.00123234		-0.936772	0.000977536		-0.934102	0.00134479		-0.940035	0.00193589		-0.935239	0.00229421		-0.937013	0.000845349		-0.934128	0.00105511		-0.934417	0.00118464		-0.940307	0.000545963		-0.936181	0.00545856		-0.940848	0.000970508		-0.936313	0.0010402		-0.938191	0.00243188
-0.931902	0.0037361		-0.927273	0.00110359		-0.928116	0.000988144		-0.934199	0.000709519		-0.936418	0.000994649		-0.930211	0.00119037		-0.927851	0.00188353		-0.9341	0.00099568		-0.927426	0.00193464		-0.930452	0.00170121		-0.928814	0.00182213		-0.928169	0.00158945		-0.932807	0.00112656		-0.93181	0.0076572		-0.935847	0.00122723		-0.931621	0.000782716		-0.932253	0.00347481
-0.926589	0.00287969		-0.921959	0.000737043		-0.924053	0.000738218		-0.926699	0.00101656		-0.928918	0.000844688		-0.926461	0.00104022		-0.919728	0.00123761		-0.926287	0.000589824		-0.921799	0.00153409		-0.922327	0.00133024		-0.924126	0.00114959		-0.924415	0.00157736		-0.925933	0.00101056		-0.925241	0.00416915		-0.928347	0.00101535		-0.926623	0.000874889		-0.924128	0.00325922
-0.918777	0.00272165		-0.917897	0.0011681		-0.918116	0.000607185		-0.920138	0.000926109		-0.923606	0.00127351		-0.921773	0.00114851		-0.913791	0.00140057		-0.920348	0.000851799		-0.917739	0.00170978		-0.916704	0.00138131		-0.917877	0.000865301		-0.919418	0.001243		-0.921245	0.000764431		-0.917428	0.00366385		-0.921473	0.00148003		-0.919124	0.00112935		-0.917879	0.00271018
-0.911589	0.00294727		-0.911023	0.000970032		-0.90999	0.000139126		-0.91545	0.000754953		-0.919231	0.00103755		-0.914273	0.000740337		-0.909728	0.00137785		-0.915972	0.000694051		-0.911488	0.00175118		-0.913263	0.00126025		-0.909752	0.00095704		-0.911918	0.00077461		-0.916247	0.000949697		-0.91118	0.00526969		-0.916785	0.000887609		-0.911624	0.000668784		-0.913503	0.00296765
-0.907215	0.00276295		-0.902897	0.00104894		-0.903741	0.000230657		-0.910449	0.00126718		-0.912668	0.000813189		-0.907399	0.000618926		-0.90379	0.00113508		-0.910349	0.00141215		-0.903363	0.00139308		-0.907327	0.0013687		-0.903812	0.00111437		-0.905044	0.000667049		-0.909057	0.00141348		-0.907121	0.00783217		-0.912097	0.000224834		-0.906619	0.000928077		-0.907879	0.00402385
-0.902215	0.00325721		-0.897583	0.00103001		-0.899991	0.00085345		-0.903262	0.00149953		-0.904855	0.000668832		-0.903023	0.000597267		-0.895352	0.000680271		-0.90285	0.00125917		-0.897113	0.00138762		-0.899515	0.00099731		-0.899754	0.00126431		-0.900665	0.00131951		-0.901244	0.00113169		-0.901491	0.00841597		-0.90491	0.00104024		-0.902248	0.00113479		-0.899753	0.00368147
-0.894402	0.00354137		-0.893525	0.000909466		-0.894991	0.000798339		-0.895762	0.00145887		-0.898605	0.000373742		-0.898022	0.000749083		-0.889102	0.000730891		-0.895663	0.00058744		-0.893363	0.00222675		-0.893579	0.00121253		-0.893814	0.00153194		-0.895668	0.00100537		-0.896247	0.000691472		-0.893373	0.00697856		-0.897097	0.000607853		-0.895061	0.00158507		-0.893191	0.00332582
-0.886902	0.00318177		-0.886647	0.000691076		-0.887178	0.000699679		-0.890761	0.00132692		-0.894542	0.000636753		-0.890835	0.000655995		-0.885665	0.00149303		-0.891287	0.00110056		-0.887112	0.00233329		-0.8892	0.0011892		-0.885689	0.00131029		-0.888168	0.00107103		-0.891871	0.000788409		-0.886804	0.00347252		-0.891783	0.000288396		-0.887248	0.000823513		-0.889753	0.00401698
-0.88284	0.00291894		-0.878521	0.00103513		-0.880615	0.000869251		-0.886073	0.00103793		-0.888605	0.00106576		-0.883023	0.000869661		-0.880353	0.000866997		-0.886286	0.00119698		-0.878676	0.00137963		-0.883577	0.000857119		-0.879127	0.00143999		-0.880668	0.00109083		-0.88531	0.00112964		-0.882745	0.00458369		-0.887721	0.000478466		-0.881938	0.000757632		-0.884754	0.00345558
-0.878777	0.00244141		-0.872899	0.00116573		-0.876241	0.000792751		-0.879199	0.00150306		-0.880792	0.00149632		-0.878022	0.000931929		-0.87254	0		-0.878787	0.00093674		-0.872739	0.00202437		-0.875765	0.00124743		-0.875065	0.00106734		-0.875663	0.000747094		-0.877185	0.000672822		-0.877122	0.00398354		-0.880534	0.000536474		-0.877872	0.00165126		-0.876941	0.00376477
-0.871902	0.00269639		-0.869462	0.00184024		-0.871241	0.00111089		-0.871386	0.0012122		-0.874231	0.00127157		-0.873646	0.000702851		-0.86629	0.000689827		-0.871287	0.00079481		-0.8693	0.00184911		-0.868891	0.0008588		-0.869125	0.000961679		-0.871292	0.00066684		-0.871558	0.000950722		-0.868684	0.00295986		-0.872408	0.00105012		-0.870685	0.00111665		-0.870378	0.00303905
-0.864402	0.0030862		-0.863522	0.0014514		-0.863741	0.00112515		-0.866072	0.00164725		-0.870168	0.000832127		-0.866772	0.000794482		-0.861602	0.00127092		-0.866599	0.00128907		-0.863675	0.000807396		-0.864511	0.000643364		-0.861	0.000970326		-0.864418	0.000638074		-0.867496	0.000701718		-0.862123	0.00264098		-0.867098	0.000780232		-0.862559	0.000850108		-0.866004	0.00369566
-0.859402	0.00256259		-0.85571	0.000721458		-0.85624	0.00106291		-0.861701	0.00140991		-0.864856	0.000822078		-0.858647	0.000700561		-0.856602	0.00112165		-0.86191	0.00134996		-0.856175	0.0013107		-0.859514	0.00133423		-0.854439	0.000933209		-0.856605	0.000445672		-0.860621	0.000460298		-0.858369	0.00525252		-0.863036	0.000763365		-0.857562	0.00134422		-0.861004	0.0035398
-0.855027	0.00190944		-0.849774	0.000874942		-0.851241	0.001319		-0.854823	0.0012151		-0.856731	0.00130269		-0.853337	0.00110228		-0.849103	0.00153358		-0.854411	0.00104638		-0.849925	0.00199264		-0.852014	0.00153474		-0.851002	0.000781154		-0.851295	0.000824639		-0.852496	0.000726311		-0.853372	0.00377177		-0.856162	0.000833715		-0.853809	0.00116319		-0.853504	0.00338441
-0.848152	0.00221323		-0.845398	0.000932943		-0.846866	0.00108661		-0.846698	0.00155244		-0.849855	0.000987305		-0.849274	0.00121099		-0.841603	0.00114928		-0.846911	0.000996113		-0.845549	0.00229505		-0.844515	0.0010963		-0.846001	0.000939957		-0.846916	0.000473813		-0.847182	0.000795172		-0.845872	0.00410782		-0.847723	0.000246844		-0.84756	0.00171895		-0.846003	0.00245569
-0.840027	0.00284982		-0.839772	0.00139655		-0.839678	0.000982363		-0.841388	0.000980879		-0.846105	0.00018204		-0.842396	0.000883614		-0.836915	0.000830065		-0.842535	0.00107564		-0.840237	0.00137291		-0.83983	0.00138278		-0.838501	0.00151169		-0.840042	0.000375215		-0.843745	0.000994784		-0.839303	0.00432041		-0.84241	0.000572883		-0.84006	0.00160865		-0.841003	0.00298733
-0.834402	0.00345347		-0.831959	0.0014512		-0.832178	0.00107158		-0.837951	0.00121241		-0.841419	0.000594818		-0.834271	0.000495849		-0.832227	0.000457905		-0.838786	0.000982895		-0.832425	0.00124114		-0.835138	0.000982807		-0.83194	0.00140772		-0.831917	0.000724581		-0.837497	0.000928793		-0.834619	0.00470143		-0.838973	0.000391248		-0.834437	0.00205803		-0.836629	0.00293492
-0.83034	0.00350092		-0.825085	0.000768213		-0.826866	0.000884088		-0.831698	0.00156032		-0.833917	0.00102248		-0.828961	0.000325707		-0.82504	0.000703773		-0.831912	0.00160674		-0.825238	0.00102616		-0.827638	0.000735214		-0.827251	0.00123837		-0.826919	0.000745843		-0.829997	0.000659706		-0.829622	0.00344308		-0.832724	0.0010604		-0.830058	0.000755215		-0.829441	0.00385861
-0.82409	0.00337565		-0.82071	0.000545877		-0.822491	0.000990649		-0.824199	0.00140846		-0.82673	0.000808164		-0.825524	0.000721802		-0.817227	0.000961522		-0.824412	0.00110576		-0.82055	0.00113376		-0.819826	0.000474799		-0.82225	0.0012369		-0.823166	0.00110834		-0.824058	0.000808288		-0.822435	0.00336622		-0.825221	0.00116757		-0.824123	0.00107586		-0.821628	0.00386204
-0.815964	0.00333981		-0.815709	0.000630116		-0.815616	0.00140186		-0.818263	0.000978804		-0.822044	0.000677915		-0.819584	0.000385267		-0.812228	0.000378617		-0.819098	0.000985062		-0.815863	0.00120479		-0.815767	0.00077683		-0.814751	0.000455532		-0.816917	0.00122591		-0.819682	0.00127678		-0.814935	0.0051822		-0.819285	0.000939241		-0.81631	0.000934121		-0.816316	0.00300266
-0.810027	0.00249278		-0.807896	0.000923671		-0.80749	0.00124655		-0.813887	0.00112693		-0.817356	0.000799081		-0.811772	0.000806353		-0.808165	0.000900313		-0.814722	0.00100326		-0.808364	0.000897129		-0.811701	0.000957795		-0.807251	0.000218276		-0.809417	0.000683099		-0.814059	0.00126654		-0.80993	0.00384454		-0.814909	0.000931013		-0.809436	0.000792991		-0.812254	0.00318896
-0.805965	0.00265321		-0.800396	0.000818323		-0.80249	0.000627418		-0.807948	0.00107735		-0.810169	0.00109031		-0.805836	0.00091277		-0.800977	0.00167304		-0.808161	0.000745622		-0.800862	0.00106588		-0.804827	0.000998571		-0.80225	0.000881961		-0.803482	0.000850487		-0.806247	0.0012362		-0.805559	0.00259355		-0.808974	0.00125952		-0.805369	0.000717137		-0.805379	0.00293286
-0.799715	0.0030594		-0.796021	0.000863106		-0.799053	0.000266691		-0.800135	0.00135721		-0.802667	0.000972232		-0.801461	0.00115122		-0.792851	0.00124432		-0.800349	0.00044551		-0.795863	0.0013851		-0.797327	0.00152676		-0.797878	0.00137229		-0.799415	0.00155381		-0.799373	0.00111181		-0.798372	0.00106293		-0.801161	0.000883907		-0.800059	0.000873378		-0.79694	0.00276854
-0.791589	0.00266004		-0.791337	0.000385093		-0.792803	0.000310626		-0.793261	0.00139684		-0.797355	0.00109649		-0.795834	0.00101127		-0.788165	0.000856925		-0.794413	0.000760573		-0.791487	0.00166439		-0.792017	0.00135378		-0.791	0.00142417		-0.79348	0.00153379		-0.794997	0.000955436		-0.790246	0.00209479		-0.794283	0.00126322		-0.792247	0.00120973		-0.791941	0.00383847
-0.78534	0.00339169		-0.783524	0.000841404		-0.78499	0.00114057		-0.789199	0.00144767		-0.79298	0.00080913		-0.788022	0.00100003		-0.784415	0.00135822		-0.79035	0.00115559		-0.783988	0.00243416		-0.78795	0.00110492		-0.782875	0.00100069		-0.785667	0.00159508		-0.789683	0.00151861		-0.784929	0.00453709		-0.789599	0.00100013		-0.78506	0.0012324		-0.78819	0.00353545
-0.781589	0.00282644		-0.776024	0.00165203		-0.779366	0.00160766		-0.783889	0.00162961		-0.786418	0.00022668		-0.781148	0.000489601		-0.777852	0.00185486		-0.784411	0.001018		-0.776175	0.00267584		-0.781389	0.00101496		-0.777565	0.000886601		-0.779106	0.000598467		-0.781871	0.00125567		-0.78087	0.00704315		-0.784598	0.000810059		-0.780376	0.00102146		-0.781941	0.00319674
-0.77659	0.00279708		-0.771649	0.00160212		-0.774991	0.00123826		-0.776076	0.002141		-0.778606	0.000514233		-0.776772	0.00053854		-0.770352	0.000784868		-0.776286	0.000894053		-0.771487	0.00127897		-0.773264	0.000874774		-0.773189	0.000758799		-0.774727	0.00074355		-0.774684	0.00190329		-0.773996	0.00717888		-0.777098	0.00116202		-0.775684	0.00141221		-0.774441	0.00407145
-0.769089	0.00250439		-0.767586	0.00176034		-0.769053	0.000710084		-0.768885	0.00196466		-0.772668	0.00149381		-0.771771	0.000541248		-0.764727	0.00170016		-0.769724	0.000814962		-0.767737	0.00113901		-0.767328	0.000933414		-0.766315	0.00106354		-0.769417	0.000862368		-0.769996	0.00121202		-0.76587	0.00528768		-0.769598	0.000965777		-0.767871	0.00060804		-0.768504	0.00351852
-0.762527	0.0025747		-0.760399	0.00164809		-0.761241	0.000848247		-0.76451	0.00162629		-0.768606	0.00127389		-0.763959	0.000750749		-0.760352	0.000752844		-0.765662	0.000919839		-0.761176	0.00160365		-0.763262	0.000757703		-0.75819	0.00126727		-0.761604	0.000670801		-0.765307	0.00112943		-0.76056	0.00565398		-0.76491	0.000576998		-0.760371	0.00123451		-0.764441	0.00239115
-0.75784	0.00302646		-0.753209	0.0010667		-0.754678	0.00104653		-0.759513	0.00227046		-0.762355	0.00110171		-0.756459	0.00147588		-0.754414	0.00141297		-0.760035	0.000781809		-0.753676	0.00195986		-0.757326	0.00162302		-0.753189	0.000930045		-0.754417	0.000998697		-0.757495	0.000911988		-0.757119	0.00725901		-0.760222	0.000768301		-0.756312	0.00137293		-0.758504	0.00294431
-0.75284	0.00350297		-0.747899	0.00108071		-0.750303	0.000583483		-0.7517	0.00142526		-0.753917	0.00137206		-0.752083	0.0014888		-0.746602	0.00205114		-0.75191	0.00119568		-0.748362	0.00201029		-0.749201	0.00147568		-0.749752	0.00118755		-0.750045	0.00142644		-0.749995	0.000991915		-0.750871	0.0054046		-0.752722	0.000832275		-0.752246	0.00153038		-0.750691	0.00329858
-0.74534	0.00353676		-0.743523	0.00155004		-0.74499	0.000569609		-0.744201	0.0015153		-0.748292	0.00100122		-0.747399	0.00109582		-0.740041	0.0018763		-0.745348	0.00148453		-0.743987	0.00151476		-0.742952	0.00136576		-0.743504	0.000948604		-0.745353	0.00149794		-0.745933	0.000745986		-0.743371	0.00516258		-0.745223	0.00115934		-0.745059	0.00156483		-0.743816	0.00338761
-0.737839	0.00343009		-0.736649	0.000777091		-0.737178	0.000910873		-0.740138	0.00176405		-0.744855	0.000981894		-0.739586	0.00122202		-0.735665	0.00190393		-0.741599	0.00163469		-0.737738	0.00146117		-0.738893	0.00170079		-0.735691	0.00109496		-0.737228	0.00167596		-0.74187	0.000755413		-0.737428	0.00762041		-0.740847	0.00172482		-0.737559	0.00240678		-0.739753	0.00280905
-0.733152	0.00268905		-0.728837	0.00105723		-0.729991	0.00107505		-0.736075	0.00143792		-0.738918	0.00108393		-0.732087	0.00123556		-0.730351	0.00197108		-0.73691	0.00112093		-0.729926	0.00119954		-0.733263	0.0013872		-0.730064	0.00122108		-0.729728	0.00145417		-0.734683	0.00117308		-0.733056	0.00697365		-0.736784	0.00206691		-0.732875	0.00229375		-0.73444	0.00308071
-0.728465	0.00250234		-0.722897	0.00154511		-0.725616	0.0011897		-0.728888	0.000872169		-0.731105	0.000979189		-0.728024	0.00174411		-0.722539	0.00136855		-0.729098	0.000766207		-0.723675	0.00162152		-0.724825	0.00156291		-0.725689	0.001657		-0.72567	0.00141915		-0.727496	0.0018664		-0.727434	0.00689679		-0.72991	0.00147757		-0.728183	0.00147326		-0.726628	0.00236139
-0.72159	0.00281791		-0.718834	0.00191698		-0.720615	0.00162577		-0.721698	0.00177234		-0.725168	0.00120761		-0.723961	0.0015292		-0.715665	0.000692151		-0.722224	0.00134		-0.7193	0.00189912		-0.718263	0.00190214		-0.719753	0.00171457		-0.721603	0.0018323		-0.722182	0.00146471		-0.719621	0.00500723		-0.722411	0.00162176		-0.721309	0.00242309		-0.719441	0.00283354
-0.713777	0.00378218		-0.712899	0.00130738		-0.712803	0.00202311		-0.7167	0.00227855		-0.720792	0.00150714		-0.716775	0.00151628		-0.711289	0.00118415		-0.717848	0.00113154		-0.713675	0.00154586		-0.71483	0.00242654		-0.711941	0.00187759		-0.714416	0.00203179		-0.717807	0.00140446		-0.712747	0.00534655		-0.71741	0.0011795		-0.713496	0.00206256		-0.715066	0.00320544
-0.708464	0.00370111		-0.704773	0.00144568		-0.705616	0.00177511		-0.712012	0.00179247		-0.715168	0.00167508		-0.709271	0.00177639		-0.705977	0.00106664		-0.712847	0.00195669		-0.705863	0.00168393		-0.709825	0.00140653		-0.705063	0.00235358		-0.706917	0.00158945		-0.711246	0.00169404		-0.708368	0.00892863		-0.713034	0.00107192		-0.707561	0.00210427		-0.710065	0.00282324
-0.704402	0.00371289		-0.698212	0.00165835		-0.701553	0.00127565		-0.705451	0.00196217		-0.707668	0.00170503		-0.704274	0.00143048		-0.698165	0.00151111		-0.70566	0.00151746		-0.698989	0.00240727		-0.702013	0.00192379		-0.701	0.00231309		-0.701919	0.00213268		-0.70312	0.00138991		-0.70337	0.00721159		-0.70616	0.00116695		-0.703494	0.00155334		-0.702253	0.00324915
-0.697215	0.00383543		-0.694149	0.00257886		-0.697178	0.00132498		-0.697326	0.00240718		-0.700481	0.00159121		-0.699898	0.00156564		-0.690978	0.00106741		-0.697848	0.00213719		-0.694613	0.00251991		-0.695452	0.00247888		-0.69569	0.00189341		-0.69754	0.00271635		-0.697185	0.00178914		-0.695558	0.00386417		-0.698348	0.00111615		-0.697246	0.00222787		-0.694753	0.00341919
-0.689089	0.00307852		-0.688523	0.00191461		-0.689991	0.00205183		-0.691699	0.00220822		-0.695793	0.00198041		-0.693024	0.0014132		-0.686915	0.0016232		-0.692851	0.00272225		-0.689299	0.0023644		-0.690767	0.00188932		-0.687878	0.00185988		-0.690979	0.00234322		-0.693122	0.00309133		-0.688371	0.00583713		-0.692408	0.00150657		-0.68912	0.0023835		-0.690691	0.00360961
-0.684089	0.00363746		-0.680085	0.0023078		-0.682803	0.00151825		-0.687323	0.00244411		-0.690794	0.00153091		-0.685212	0.00205753		-0.68254	0.00247186		-0.688475	0.00265789		-0.681176	0.00237595		-0.685762	0.0022069		-0.680691	0.00291878		-0.683166	0.00202324		-0.68687	0.00260357		-0.683679	0.00830232		-0.688345	0.00211628		-0.683185	0.00211635		-0.686628	0.0030505
-0.680652	0.00398477		-0.673523	0.00282822		-0.678116	0.00216282		-0.681388	0.00314782		-0.683294	0.00196939		-0.679585	0.00323791		-0.67504	0.00298968		-0.681597	0.00342128		-0.673987	0.00256698		-0.678575	0.00333957		-0.676002	0.00260181		-0.677231	0.00279868		-0.678744	0.00281343		-0.678994	0.00960972		-0.68241	0.00217757		-0.679126	0.00262799		-0.679441	0.00344505
-0.67409	0.00370538		-0.670086	0.00308607		-0.673429	0.00259561		-0.673262	0.00274098		-0.675792	0.00219704		-0.67521	0.00259149		-0.668164	0.00301886		-0.673476	0.0034514		-0.670237	0.00302742		-0.670763	0.00273446		-0.671314	0.00301917		-0.673164	0.00319204		-0.672496	0.00291713		-0.671182	0.00703579		-0.674284	0.00184598		-0.673183	0.00261379		-0.672253	0.00498529
-0.666277	0.00393032		-0.664773	0.00312967		-0.666553	0.00227786		-0.66701	0.00361585		-0.671106	0.00283901		-0.669274	0.00221164		-0.663165	0.00383576		-0.668162	0.00305941		-0.665862	0.00343091		-0.665766	0.00262789		-0.663502	0.00297889		-0.666916	0.00340257		-0.668433	0.00301612		-0.663682	0.007407		-0.668036	0.00263629		-0.664744	0.00347628		-0.667253	0.00439552
-0.660964	0.004528		-0.65696	0.00365365		-0.658428	0.00244993		-0.662947	0.00431645		-0.66673	0.00360872		-0.661149	0.00378415		-0.658477	0.00419578		-0.664099	0.00384924		-0.658362	0.00349437		-0.661386	0.00282736		-0.656002	0.00326802		-0.65879	0.00344635		-0.662498	0.00323049		-0.659303	0.00936688		-0.663661	0.0020883		-0.658496	0.00372379		-0.662879	0.0041369
-0.656589	0.00472018		-0.650399	0.00462861		-0.653115	0.00397146		-0.657012	0.00473739		-0.659231	0.00369703		-0.654896	0.00401344		-0.651603	0.00450828		-0.657225	0.00362323		-0.651175	0.00468067		-0.654512	0.00311636		-0.651939	0.00375793		-0.652542	0.00277617		-0.654372	0.00337845		-0.655244	0.0113219		-0.658034	0.00225101		-0.655063	0.00368027		-0.656004	0.00387806
-0.65034	0.00451281		-0.646023	0.00515812		-0.649054	0.00368203		-0.648887	0.00451374		-0.651418	0.00329314		-0.650521	0.00366066		-0.64379	0.00473865		-0.6491	0.00366982		-0.646487	0.00494693		-0.6467	0.00303628		-0.647877	0.00405719		-0.648483	0.00449674		-0.64812	0.00380043		-0.648057	0.0110177		-0.649909	0.00367139		-0.649745	0.00472742		-0.647878	0.00404833
-0.642527	0.00526563		-0.641022	0.00509163		-0.64249	0.00429249		-0.642638	0.00479734		-0.647043	0.00347963		-0.644898	0.00391785		-0.638478	0.00538303		-0.643786	0.00396668		-0.641801	0.00432593		-0.64139	0.00424713		-0.64069	0.00395322		-0.64254	0.00439981		-0.644683	0.00464192		-0.640558	0.012402		-0.643347	0.00429406		-0.641933	0.00407314		-0.642254	0.00554051
-0.635965	0.00663866		-0.633523	0.00436899		-0.634366	0.00493166		-0.638888	0.00463677		-0.643293	0.00451003		-0.636773	0.00453011		-0.634103	0.0055651		-0.640349	0.0048746		-0.634612	0.00433959		-0.637018	0.00504561		-0.63319	0.00469873		-0.634414	0.0043133		-0.639682	0.00439722		-0.63556	0.0141117		-0.639597	0.00382978		-0.635684	0.00495166		-0.637878	0.00533866
-0.631589	0.00647704		-0.626023	0.00513563		-0.628428	0.00572557		-0.633574	0.00572553		-0.636419	0.00404623		-0.630211	0.00548974		-0.627539	0.00540885		-0.6341	0.00539942		-0.627112	0.00512681		-0.630136	0.00560217		-0.628189	0.00487926		-0.628166	0.0048853		-0.631869	0.00560043		-0.631181	0.011281		-0.634596	0.00443044		-0.631312	0.00569358		-0.63194	0.0065459
-0.626277	0.00687043		-0.621022	0.00558937		-0.624366	0.00597261		-0.626075	0.00561059		-0.628606	0.00401009		-0.626774	0.00605285		-0.619727	0.00530839		-0.626601	0.00522044		-0.6218	0.00709592		-0.622019	0.00621905		-0.623814	0.00596136		-0.62442	0.00552045		-0.625308	0.00582074		-0.62462	0.013106		-0.627097	0.0053271		-0.625995	0.00735722		-0.623816	0.00658343
-0.618465	0.00679926		-0.616646	0.0069299		-0.618115	0.00627186		-0.619513	0.00594398		-0.623292	0.00528225		-0.621773	0.00650059		-0.613789	0.00806744		-0.620661	0.00547418		-0.617425	0.00778395		-0.616701	0.00597398		-0.616939	0.00761266		-0.619415	0.00700588		-0.62062	0.00705284		-0.616807	0.0144575		-0.620223	0.00655021		-0.618495	0.0078199		-0.617566	0.00760233
-0.611277	0.00801544		-0.609459	0.00766023		-0.609678	0.00696807		-0.615138	0.0075319		-0.61923	0.00694708		-0.613961	0.00682568		-0.609727	0.00904471		-0.616286	0.0068898		-0.610863	0.00733045		-0.613268	0.00704191		-0.609127	0.00754961		-0.611602	0.00815175		-0.615623	0.00743424		-0.610872	0.0181925		-0.615534	0.00619331		-0.610995	0.00833849		-0.613503	0.0083372
-0.606902	0.00881058		-0.601647	0.00792854		-0.604053	0.00826607		-0.609824	0.00747111		-0.612669	0.00614742		-0.6074	0.00762786		-0.603476	0.00987813		-0.610663	0.00786836		-0.602738	0.00783144		-0.607012	0.00743032		-0.603188	0.00785076		-0.605041	0.00812673		-0.608119	0.00707231		-0.606805	0.0219128		-0.610533	0.00644242		-0.606311	0.0102626		-0.607566	0.00855462
-0.601902	0.00986992		-0.596337	0.00934699		-0.600616	0.00841715		-0.602324	0.0090862		-0.604856	0.00684698		-0.603024	0.00810518		-0.59504	0.0104269		-0.60285	0.00906014		-0.596801	0.00812145		-0.599512	0.00960023		-0.599125	0.00848387		-0.60067	0.00980874		-0.600619	0.00811833		-0.600557	0.0233976		-0.603346	0.00755671		-0.601627	0.0122113		-0.599441	0.00924303
-0.594089	0.00974909		-0.592274	0.0100754		-0.594991	0.00891681		-0.594825	0.00991625		-0.598606	0.00931186		-0.598023	0.00997528		-0.589415	0.0118812		-0.595972	0.00909893		-0.592738	0.00990268		-0.593576	0.0105723		-0.592876	0.00864647		-0.595665	0.00955172		-0.595935	0.00983164		-0.592431	0.0219626		-0.595847	0.00874897		-0.594432	0.0128009		-0.593191	0.00987629
-0.586902	0.0107774		-0.585396	0.0107822		-0.587491	0.00901605		-0.590136	0.0106044		-0.594543	0.01087		-0.590523	0.0103345		-0.585976	0.0132965		-0.591601	0.00990024		-0.586488	0.00947376		-0.589205	0.0104536		-0.584751	0.00991458		-0.588165	0.00998947		-0.591247	0.0100688		-0.586183	0.0232251		-0.590846	0.010331		-0.586619	0.0126458		-0.589441	0.0121345
-0.582839	0.0119987		-0.576962	0.0121265		-0.580928	0.0114997		-0.585761	0.0120369		-0.588605	0.0111908		-0.583024	0.0114832		-0.580352	0.0133552		-0.586287	0.0116062		-0.578049	0.0125512		-0.583574	0.0110868		-0.578815	0.0121471		-0.580665	0.0121236		-0.58406	0.0107758		-0.582116	0.0228162		-0.586161	0.0119602		-0.581622	0.0139783		-0.584128	0.0121791
-0.578464	0.0129363		-0.571961	0.0150036		-0.576553	0.0131972		-0.578261	0.0142997		-0.58048	0.0115218		-0.578023	0.0128331		-0.572539	0.0135277		-0.578787	0.013943		-0.572425	0.0158075		-0.575762	0.0122971		-0.574753	0.0134237		-0.575981	0.0144979		-0.576247	0.0118161		-0.576181	0.0206266		-0.579283	0.0133905		-0.577251	0.0165283		-0.576628	0.0129103
-0.570964	0.0143933		-0.568211	0.0150664		-0.57124	0.0132976		-0.570449	0.0153636		-0.57423	0.0126112		-0.573334	0.0133342		-0.566289	0.0143412		-0.5716	0.015824		-0.568988	0.0171558		-0.568888	0.0142198		-0.5685	0.0165422		-0.571289	0.014496		-0.570933	0.0135675		-0.568055	0.0240051		-0.571471	0.0131126		-0.570064	0.0167788		-0.570066	0.0153774
-0.564089	0.0164343		-0.561959	0.0171893		-0.56374	0.013645		-0.565448	0.0157391		-0.569856	0.0133579		-0.56646	0.0137659		-0.561915	0.0186617		-0.566912	0.0157755		-0.56305	0.0178716		-0.564516	0.0163586		-0.560375	0.0173018		-0.564415	0.0157507		-0.566558	0.0146021		-0.561807	0.031363		-0.566161	0.0145463		-0.561938	0.0172714		-0.565691	0.016868
-0.559402	0.0186172		-0.554459	0.0189398		-0.55624	0.0170384		-0.561385	0.0179004		-0.564231	0.0153302		-0.558648	0.0167758		-0.55629	0.0200391		-0.562224	0.0173181		-0.55555	0.019798		-0.559206	0.0185384		-0.554127	0.0194915		-0.556602	0.0187645		-0.559684	0.0168261		-0.558053	0.0355011		-0.561785	0.0164157		-0.557246	0.0227746		-0.560379	0.0164069
-0.554715	0.0207908		-0.548523	0.0226124		-0.551554	0.0205828		-0.554198	0.019564		-0.556419	0.0175531		-0.553334	0.019173		-0.548789	0.0219296		-0.554411	0.0185257		-0.549613	0.0218982		-0.551393	0.0209349		-0.55069	0.0221635		-0.551292	0.0214802		-0.551871	0.0184806		-0.553056	0.0381912		-0.554911	0.0197508		-0.5535	0.0251642		-0.552878	0.0184726
-0.54784	0.0215645		-0.544148	0.0252763		-0.546865	0.0229647		-0.546073	0.0219125		-0.549856	0.0206619		-0.548958	0.0215764		-0.541602	0.0256215		-0.546912	0.0216007		-0.545237	0.0254388		-0.544199	0.0224288		-0.545376	0.0243054		-0.547226	0.0234309		-0.546557	0.0217875		-0.545556	0.0399164		-0.546786	0.02315		-0.546939	0.0254661		-0.545691	0.0206564
-0.540027	0.0254642		-0.538521	0.027879		-0.539679	0.0254174		-0.541076	0.028314		-0.546106	0.0223455		-0.542084	0.0234717		-0.537226	0.0281569		-0.542849	0.0251479		-0.539613	0.025806		-0.539827	0.0256036		-0.537876	0.0267222		-0.540039	0.0261137		-0.54312	0.0261493		-0.538995	0.042142		-0.541472	0.0257543		-0.539432	0.0292243		-0.540691	0.0254084
-0.534402	0.0301822		-0.530709	0.0312097		-0.531866	0.0294225		-0.537326	0.0304226		-0.541105	0.0242809		-0.533959	0.0282246		-0.532227	0.0310933		-0.538786	0.0280725		-0.532113	0.0309971		-0.535143	0.0290159		-0.531315	0.0314151		-0.531913	0.0296943		-0.536872	0.0284717		-0.534303	0.0464877		-0.538035	0.0272117		-0.534122	0.034496		-0.536316	0.0284818
-0.53034	0.0320812		-0.523835	0.0364406		-0.526865	0.0357485		-0.531073	0.0321935		-0.533605	0.0286166		-0.528962	0.0332539		-0.524728	0.0321917		-0.531599	0.0320867		-0.524926	0.0355164		-0.52733	0.0317622		-0.526627	0.0350359		-0.526916	0.0340603		-0.529059	0.0335333		-0.529306	0.0533747		-0.531786	0.0297239		-0.52975	0.0368949		-0.529129	0.0310458
-0.523777	0.0354755		-0.519772	0.0408015		-0.522491	0.0410448		-0.523261	0.0368396		-0.526418	0.0333516		-0.525212	0.0352069		-0.517228	0.038182		-0.5241	0.0351173		-0.520238	0.0401218		-0.519831	0.0389709		-0.521625	0.0386559		-0.523483	0.037496		-0.523433	0.0373876		-0.521806	0.0630679		-0.523974	0.03298		-0.523502	0.0391479		-0.521316	0.0373859
-0.515652	0.0418998		-0.514462	0.0466077		-0.515303	0.0418711		-0.517638	0.0439615		-0.522043	0.0375481		-0.51896	0.0361203		-0.51254	0.0447414		-0.519099	0.0390465		-0.515549	0.0435842		-0.515764	0.0442517		-0.514126	0.0422774		-0.516914	0.0385742		-0.519057	0.0402205		-0.514306	0.0651954		-0.518034	0.0386578		-0.515689	0.0432951		-0.516003	0.0422927
-0.509715	0.0471572		-0.506649	0.0522612		-0.50749	0.0462414		-0.513263	0.0480996		-0.517044	0.0420338		-0.511147	0.0421873		-0.508164	0.0494878		-0.514723	0.0435403		-0.50805	0.0480213		-0.511705	0.047485		-0.506626	0.050167		-0.509102	0.0463303		-0.513122	0.0447969		-0.509622	0.0662714		-0.513972	0.0439495		-0.50912	0.051205		-0.511941	0.0463367
-0.505652	0.0535708		-0.499459	0.0598435		-0.502804	0.0551318		-0.507323	0.0541942		-0.509855	0.0449623		-0.505524	0.0523026		-0.500665	0.0537127		-0.508162	0.0488581		-0.500237	0.057436		-0.504518	0.050706		-0.501938	0.0581272		-0.503792	0.0547228		-0.505309	0.0487026		-0.50493	0.0762482		-0.508036	0.049087		-0.505061	0.0585903		-0.504754	0.0517555
-0.499402	0.0587174		-0.495087	0.0647264		-0.499054	0.0602903		-0.499198	0.0616209		-0.502042	0.0531214		-0.501149	0.0544092		-0.492852	0.0621368		-0.500037	0.0551923		-0.495551	0.0660707		-0.497019	0.0598541		-0.497253	0.0632526		-0.49942	0.0591428		-0.498435	0.0584849		-0.497743	0.0794198		-0.499911	0.0551861		-0.499438	0.0633265		-0.496628	0.0591028
-0.490964	0.0650803		-0.490086	0.0726737		-0.492491	0.0639016		-0.492949	0.0686119		-0.497043	0.0608318		-0.495522	0.0598217		-0.488164	0.073454		-0.49441	0.0646609		-0.491175	0.0721669		-0.492014	0.0658731		-0.490063	0.0660328		-0.493164	0.0636825		-0.494372	0.0672492		-0.48993	0.0879159		-0.493346	0.064605		-0.491626	0.0675608		-0.491628	0.0696595
-0.485027	0.0738271		-0.482274	0.0785671		-0.484991	0.0758748		-0.488574	0.0749683		-0.49298	0.0691784		-0.48771	0.0675631		-0.484414	0.079977		-0.490038	0.0707407		-0.483676	0.078363		-0.487642	0.070582		-0.48225	0.0739557		-0.485351	0.0710609		-0.489058	0.0704737		-0.484933	0.100379		-0.488974	0.0746618		-0.484744	0.077999		-0.488191	0.0751579
-0.48159	0.0798496		-0.474774	0.0874441		-0.479366	0.0823927		-0.48326	0.0809712		-0.486106	0.0700165		-0.480836	0.077575		-0.47754	0.08339		-0.484099	0.0772403		-0.475863	0.0877281		-0.481081	0.0768815		-0.477253	0.0857202		-0.47879	0.0818158		-0.480933	0.0765965		-0.480554	0.116008		-0.48366	0.0807463		-0.480373	0.0908289		-0.481628	0.076944
-0.476277	0.0888297		-0.471024	0.0978493		-0.474991	0.0915263		-0.475447	0.0887552		-0.477981	0.078922		-0.47646	0.0871484		-0.47004	0.0938061		-0.475974	0.0852592		-0.471488	0.0987746		-0.472956	0.085851		-0.472877	0.0933514		-0.474418	0.0882574		-0.473746	0.0876406		-0.473367	0.115677		-0.475848	0.0876997		-0.475062	0.0950069		-0.474128	0.0852816
-0.468464	0.0981314		-0.466649	0.101775		-0.469053	0.0971385		-0.468261	0.100762		-0.472667	0.0937306		-0.471146	0.0966082		-0.464726	0.10216		-0.469725	0.0971707		-0.467425	0.103899		-0.467012	0.100011		-0.465691	0.0998866		-0.469101	0.094916		-0.469371	0.0981826		-0.465555	0.11893		-0.468661	0.0951079		-0.46725	0.0998355		-0.468504	0.0967185
-0.462215	0.107882		-0.459462	0.111468		-0.460928	0.107379		-0.463885	0.110807		-0.468605	0.101404		-0.463334	0.101739		-0.460666	0.109682		-0.465662	0.106704		-0.460551	0.106989		-0.462953	0.109485		-0.457878	0.109328		-0.461288	0.102904		-0.46437	0.106755		-0.460557	0.135725		-0.464285	0.104666		-0.460063	0.109082		-0.464128	0.106272
-0.45784	0.115271		-0.452271	0.12239		-0.454678	0.119688		-0.458888	0.117411		-0.46173	0.105337		-0.456147	0.108796		-0.454102	0.114195		-0.459723	0.111174		-0.453049	0.122046		-0.456705	0.114407		-0.452877	0.122426		-0.454414	0.117154		-0.456557	0.115777		-0.456804	0.150372		-0.459597	0.113603		-0.455997	0.122414		-0.458191	0.117119
-0.452527	0.122899		-0.447274	0.135556		-0.450304	0.131734		-0.451075	0.127231		-0.453605	0.113448		-0.451771	0.122815		-0.44629	0.127457		-0.451598	0.120868		-0.447737	0.136605		-0.44858	0.125281		-0.449127	0.129764		-0.450042	0.133101		-0.44937	0.126605		-0.450555	0.157214		-0.451785	0.11749		-0.451625	0.130837		-0.450378	0.127083
-0.445027	0.134295		-0.442585	0.145742		-0.444677	0.138249		-0.443888	0.143479		-0.448293	0.130301		-0.446774	0.132577		-0.440039	0.14503		-0.445349	0.136928		-0.443362	0.146474		-0.442636	0.140191		-0.442875	0.139299		-0.444732	0.137823		-0.445308	0.137901		-0.442743	0.169435		-0.444285	0.131586		-0.444438	0.140316		-0.443503	0.133836
-0.437839	0.148584		-0.435711	0.153141		-0.436865	0.146614		-0.439826	0.154153		-0.444856	0.140646		-0.438962	0.143281		-0.435664	0.155274		-0.441599	0.144642		-0.437113	0.158569		-0.438577	0.153387		-0.435375	0.150374		-0.43692	0.148606		-0.440932	0.143349		-0.43712	0.177619		-0.440222	0.14821		-0.437251	0.15601		-0.439441	0.147027
-0.433152	0.161295		-0.427899	0.167205		-0.429991	0.159588		-0.43545	0.157277		-0.438606	0.145557		-0.431462	0.15724		-0.430039	0.158079		-0.436598	0.1501		-0.429301	0.166989		-0.432642	0.156363		-0.429752	0.163492		-0.429733	0.165754		-0.433745	0.156259		-0.432741	0.184155		-0.43616	0.153558		-0.432246	0.170412		-0.434128	0.156875
-0.428152	0.172389		-0.422272	0.18387		-0.425928	0.175626		-0.428263	0.166465		-0.430793	0.155585		-0.427712	0.172349		-0.421914	0.174676		-0.428786	0.16535		-0.423051	0.179204		-0.424204	0.165822		-0.425377	0.175737		-0.425667	0.178739		-0.426558	0.170667		-0.426805	0.195915		-0.428973	0.161569		-0.427562	0.182278		-0.426316	0.163696
-0.420965	0.177865		-0.417897	0.195065		-0.420616	0.185506		-0.421073	0.186909		-0.424856	0.174267		-0.423649	0.178682		-0.415353	0.189627		-0.422224	0.17716		-0.418988	0.190864		-0.418268	0.186655		-0.419437	0.181794		-0.421295	0.183381		-0.421557	0.183592		-0.41868	0.219494		-0.421473	0.180187		-0.420688	0.191408		-0.419128	0.179992
-0.413152	0.194018		-0.411648	0.204129		-0.412491	0.19531		-0.416075	0.204637		-0.420793	0.187556		-0.416459	0.183663		-0.41129	0.206994		-0.417849	0.183853		-0.41305	0.200028		-0.414514	0.203488		-0.411316	0.195111		-0.414108	0.190714		-0.417182	0.196883		-0.412431	0.23437		-0.416472	0.193225		-0.413188	0.199448		-0.414754	0.19146
-0.408152	0.213391		-0.403523	0.217132		-0.405304	0.215184		-0.411387	0.212671		-0.414855	0.19527		-0.408959	0.199695		-0.405665	0.214428		-0.412848	0.198439		-0.405238	0.212643		-0.409204	0.206052		-0.404751	0.210055		-0.406913	0.209679		-0.410308	0.204174		-0.408059	0.238784		-0.412096	0.200641		-0.407558	0.209215		-0.409753	0.206556
-0.403777	0.220938		-0.397583	0.232817		-0.401865	0.232032		-0.404513	0.220374		-0.407043	0.20757		-0.403962	0.215071		-0.39754	0.222922		-0.405348	0.212713		-0.398675	0.228702		-0.401705	0.212639		-0.400688	0.226101		-0.402229	0.224415		-0.402183	0.21613		-0.402742	0.243211		-0.405222	0.211785		-0.403499	0.22348		-0.401941	0.21901
-0.39659	0.227205		-0.393525	0.241885		-0.397179	0.236817		-0.396701	0.235458		-0.40048	0.220045		-0.399586	0.225409		-0.390977	0.239438		-0.397849	0.228632		-0.394612	0.245698		-0.395143	0.236571		-0.395378	0.234837		-0.397545	0.239412		-0.39656	0.236126		-0.394929	0.264829		-0.39741	0.226274		-0.396937	0.228317		-0.394441	0.234371
-0.388464	0.240456		-0.387272	0.251723		-0.389679	0.244526		-0.391074	0.249496		-0.395793	0.231607		-0.393021	0.233695		-0.387227	0.255337		-0.392848	0.244742		-0.388987	0.25216		-0.390764	0.245802		-0.387566	0.242735		-0.390671	0.244225		-0.392497	0.249389		-0.388055	0.293614		-0.39147	0.239773		-0.388812	0.250312		-0.39069	0.247577
-0.383777	0.259311		-0.378834	0.269066		-0.382803	0.263137		-0.387011	0.269871		-0.390792	0.240418		-0.384896	0.248835		-0.382228	0.263773		-0.388476	0.259394		-0.380862	0.265826		-0.385767	0.251644		-0.380375	0.259741		-0.382545	0.256177		-0.386245	0.257199		-0.383684	0.295948		-0.387412	0.251386		-0.382876	0.274941		-0.386316	0.261042
-0.380339	0.274116		-0.372899	0.288899		-0.378117	0.279709		-0.38045	0.274716		-0.38298	0.252942		-0.379273	0.264889		-0.374728	0.274392		-0.381598	0.264929		-0.373988	0.285557		-0.378267	0.264822		-0.376003	0.281823		-0.377228	0.276446		-0.378119	0.264952		-0.378679	0.306969		-0.381159	0.261697		-0.37881	0.281512		-0.379128	0.267409
-0.373464	0.279927		-0.369149	0.299285		-0.373428	0.287266		-0.372638	0.291904		-0.375793	0.273524		-0.374898	0.286045		-0.367852	0.286846		-0.373473	0.281873		-0.370238	0.30132		-0.370767	0.280049		-0.370689	0.292166		-0.373169	0.287528		-0.371871	0.284445		-0.370866	0.319976		-0.373034	0.276212		-0.372562	0.284542		-0.371941	0.277347
-0.365964	0.292609		-0.363835	0.308844		-0.366241	0.299703		-0.366698	0.303701		-0.371418	0.289048		-0.368962	0.290862		-0.363164	0.304036		-0.368163	0.295288		-0.36555	0.304094		-0.365763	0.302346		-0.362877	0.30366		-0.366607	0.295921		-0.367808	0.300886		-0.363366	0.340406		-0.366785	0.295116		-0.364123	0.300232		-0.366941	0.292448
-0.360652	0.305925		-0.356335	0.318137		-0.35874	0.312817		-0.362635	0.317452		-0.366731	0.2971		-0.360837	0.30576		-0.358477	0.318433		-0.3641	0.309159		-0.35805	0.31317		-0.361391	0.318113		-0.35569	0.316895		-0.358795	0.30931		-0.361873	0.305733		-0.359308	0.352532		-0.362723	0.31304		-0.358501	0.322843		-0.362254	0.310421
-0.356277	0.322788		-0.349774	0.334869		-0.353115	0.332208		-0.356387	0.327034		-0.358919	0.303085		-0.354584	0.323286		-0.351291	0.329058		-0.357226	0.317875		-0.351176	0.333056		-0.354204	0.320924		-0.351627	0.340437		-0.352852	0.326795		-0.353435	0.318392		-0.355241	0.364811		-0.356783	0.312322		-0.35506	0.335372		-0.355379	0.321581
-0.350027	0.331381		-0.345086	0.347927		-0.349052	0.345084		-0.347949	0.335405		-0.351417	0.32004		-0.350522	0.336841		-0.343789	0.347943		-0.349101	0.334032		-0.346488	0.347943		-0.346391	0.33914		-0.347252	0.344242		-0.348793	0.340349		-0.347495	0.33729		-0.348054	0.361152		-0.348658	0.336483		-0.349124	0.341117		-0.347566	0.33455
-0.341902	0.347977		-0.340085	0.359992		-0.342491	0.34985		-0.342013	0.361406		-0.347356	0.338211		-0.344586	0.342991		-0.338477	0.355487		-0.344099	0.350922		-0.341799	0.3652		-0.341387	0.35861		-0.340065	0.349866		-0.342544	0.354316		-0.343745	0.353687		-0.340555	0.382206		-0.34241	0.349745		-0.341624	0.35277		-0.341941	0.35178
-0.335652	0.363897		-0.332272	0.373519		-0.334366	0.362461		-0.338576	0.383952		-0.343294	0.352429		-0.336461	0.356229		-0.334102	0.376506		-0.34035	0.357352		-0.334613	0.377408		-0.337328	0.364263		-0.332878	0.366861		-0.334106	0.368265		-0.338435	0.361873		-0.33587	0.397632		-0.338973	0.365681		-0.335376	0.375437		-0.337879	0.360589
-0.331277	0.385287		-0.324772	0.391657		-0.328428	0.383183		-0.332949	0.383766		-0.336105	0.365476		-0.330208	0.377829		-0.32754	0.387857		-0.334097	0.370601		-0.3268	0.398351		-0.330141	0.375896		-0.32819	0.386201		-0.328171	0.38632		-0.330932	0.372423		-0.331178	0.400528		-0.333659	0.373512		-0.330997	0.391986		-0.331316	0.371014
-0.325964	0.396456		-0.320084	0.408763		-0.324366	0.400188		-0.325137	0.398924		-0.328918	0.379569		-0.326459	0.396354		-0.319415	0.403241		-0.326285	0.391722		-0.321801	0.40246		-0.322016	0.394773		-0.323501	0.401151		-0.32473	0.404069		-0.324683	0.393331		-0.324304	0.423077		-0.325846	0.395133		-0.325687	0.392809		-0.323503	0.390787
-0.317839	0.403207		-0.3154	0.422795		-0.318115	0.41258		-0.318888	0.422494		-0.323919	0.397687		-0.321148	0.409082		-0.314103	0.418037		-0.320662	0.408161		-0.317425	0.412816		-0.317018	0.412953		-0.316627	0.410366		-0.31942	0.406124		-0.319995	0.400603		-0.316491	0.433046		-0.319285	0.40633		-0.317874	0.412818		-0.317566	0.41526
-0.310964	0.424698		-0.308209	0.43398		-0.309679	0.421962		-0.314513	0.436113		-0.319543	0.404528		-0.313649	0.414446		-0.31004	0.426804		-0.316287	0.418448		-0.310549	0.429342		-0.313577	0.431054		-0.308815	0.425153		-0.311607	0.423016		-0.314998	0.411906		-0.310869	0.447923		-0.314909	0.419891		-0.310687	0.439756		-0.313191	0.422275
-0.306902	0.442157		-0.300396	0.453454		-0.304052	0.444312		-0.309199	0.445325		-0.312667	0.418179		-0.307084	0.434014		-0.303164	0.443947		-0.310351	0.430787		-0.302737	0.446759		-0.307016	0.434639		-0.303188	0.446358		-0.305351	0.443913		-0.307185	0.430148		-0.30681	0.476077		-0.309908	0.436991		-0.306308	0.456419		-0.306941	0.437508
-0.30159	0.455628		-0.295399	0.474414		-0.300615	0.463575		-0.301699	0.449813		-0.304855	0.43272		-0.302712	0.456323		-0.295039	0.458151		-0.302538	0.445014		-0.297112	0.464654		-0.299516	0.452773		-0.299126	0.463779		-0.300979	0.461301		-0.299994	0.452061		-0.300554	0.478239		-0.302096	0.443514		-0.301311	0.464561		-0.298816	0.452514
-0.293464	0.466104		-0.291024	0.480821		-0.294991	0.469002		-0.294513	0.468977		-0.298917	0.454526		-0.297398	0.466136		-0.289414	0.480417		-0.295973	0.465398		-0.29305	0.477076		-0.293894	0.473528		-0.292564	0.473814		-0.295669	0.474215		-0.29531	0.472284		-0.292428	0.498194		-0.294596	0.46078		-0.293811	0.476533		-0.292879	0.470316
-0.286277	0.487265		-0.283837	0.489307		-0.287178	0.483495		-0.289824	0.493386		-0.294855	0.470467		-0.289898	0.476926		-0.285977	0.487849		-0.291598	0.484247		-0.286488	0.482907		-0.289514	0.485418		-0.284439	0.491409		-0.28817	0.489383		-0.290622	0.47373		-0.286493	0.506044		-0.289908	0.479783		-0.286311	0.48777		-0.289128	0.476357
-0.282527	0.502492		-0.276024	0.507784		-0.28124	0.502084		-0.284823	0.50591		-0.288917	0.473168		-0.282399	0.489198		-0.28004	0.503621		-0.286288	0.491204		-0.278363	0.509239		-0.283579	0.499763		-0.278503	0.51471		-0.280983	0.498407		-0.283122	0.488511		-0.282434	0.521573		-0.285536	0.489826		-0.281314	0.512046		-0.283816	0.492689
-0.277839	0.516558		-0.271023	0.530789		-0.276865	0.518698		-0.277636	0.522464		-0.280794	0.496292		-0.277711	0.511337		-0.27254	0.521364		-0.278475	0.49705		-0.272738	0.532568		-0.275766	0.517235		-0.274441	0.525537		-0.276291	0.523186		-0.27531	0.508819		-0.276185	0.51578		-0.278037	0.501612		-0.276935	0.526843		-0.276004	0.507914
-0.270652	0.529587		-0.267586	0.544542		-0.27124	0.529576		-0.269824	0.542477		-0.274543	0.515147		-0.273335	0.522346		-0.266602	0.548306		-0.271288	0.517472		-0.269301	0.5422		-0.269205	0.53099		-0.268188	0.533567		-0.271293	0.533019		-0.270308	0.529969		-0.26806	0.543411		-0.270224	0.521835		-0.269435	0.539465		-0.269753	0.531097
-0.263777	0.549758		-0.261021	0.553104		-0.263428	0.546325		-0.265136	0.559813		-0.270168	0.531681		-0.265835	0.532494		-0.262227	0.555742		-0.266913	0.538209		-0.263051	0.55132		-0.264826	0.544856		-0.25975	0.555914		-0.264106	0.546549		-0.266246	0.545801		-0.261804	0.570978		-0.265223	0.541151		-0.261623	0.561846		-0.265379	0.539648
-0.25909	0.561702		-0.253209	0.567953		-0.256554	0.56689		-0.26076	0.567813		-0.264543	0.546322		-0.258023	0.556759		-0.256602	0.564422		-0.261912	0.558056		-0.255551	0.57028		-0.259516	0.554811		-0.254127	0.57528		-0.256294	0.569035		-0.259059	0.553365		-0.258371	0.584156		-0.260848	0.561102		-0.256938	0.581612		-0.260066	0.556183
-0.254402	0.568812		-0.247899	0.587325		-0.251865	0.586549		-0.25326	0.583392		-0.256418	0.555348		-0.253022	0.580062		-0.24879	0.575903		-0.254099	0.563768		-0.249613	0.585935		-0.251703	0.575561		-0.25069	0.587801		-0.251602	0.582907		-0.250934	0.568357		-0.252748	0.596192		-0.253661	0.569375		-0.253184	0.59685		-0.252566	0.572059
-0.247215	0.579194		-0.243523	0.60209		-0.247179	0.598993		-0.245135	0.601078		-0.249855	0.579825		-0.248959	0.593817		-0.241603	0.591748		-0.246912	0.584098		-0.245238	0.600208		-0.244516	0.606461		-0.245064	0.597524		-0.24723	0.597178		-0.246245	0.591976		-0.245241	0.617987		-0.245848	0.587302		-0.246623	0.599324		-0.245066	0.589826
-0.239402	0.6014		-0.237275	0.611171		-0.239367	0.611749		-0.240451	0.619426		-0.246105	0.595446		-0.241772	0.599862		-0.237227	0.621716		-0.24285	0.608157		-0.239613	0.61356		-0.240137	0.622207		-0.237251	0.612428		-0.239731	0.610045		-0.242496	0.607358		-0.238679	0.631022		-0.24116	0.611102		-0.239123	0.613529		-0.240378	0.611392
-0.234089	0.628153		-0.229462	0.631653		-0.231865	0.625496		-0.236701	0.635251		-0.241106	0.612259		-0.233647	0.621479		-0.232228	0.634132		-0.238474	0.617903		-0.231801	0.636418		-0.23514	0.620889		-0.231003	0.631958		-0.231918	0.630931		-0.235934	0.620037		-0.234308	0.667848		-0.23741	0.62621		-0.233813	0.638833		-0.236004	0.629716
-0.229715	0.644752		-0.222897	0.659098		-0.227179	0.646792		-0.230136	0.639434		-0.233606	0.62702		-0.228646	0.63739		-0.224727	0.638869		-0.231287	0.630655		-0.224925	0.659457		-0.227327	0.633737		-0.226627	0.654594		-0.227226	0.660676		-0.228435	0.632514		-0.228998	0.662584		-0.230849	0.639013		-0.229434	0.646377		-0.228504	0.638234
-0.223152	0.660195		-0.218522	0.683968		-0.222803	0.661121		-0.222636	0.663984		-0.22673	0.637672		-0.224896	0.650841		-0.217227	0.666618		-0.224101	0.650753		-0.220549	0.668469		-0.22014	0.66471		-0.221313	0.663124		-0.22348	0.670826		-0.222808	0.651841		-0.221498	0.676799		-0.223349	0.654973		-0.223186	0.661117		-0.220691	0.647686
-0.215027	0.676605		-0.213212	0.696068		-0.215303	0.667046		-0.217013	0.684628		-0.222356	0.654009		-0.218648	0.665452		-0.212851	0.68565		-0.219412	0.673853		-0.21555	0.679143		-0.216074	0.677873		-0.213814	0.673257		-0.216919	0.671487		-0.218432	0.668627		-0.214303	0.694092		-0.217722	0.67252		-0.21506	0.680904		-0.215691	0.664819
-0.209402	0.697555		-0.205399	0.703231		-0.207491	0.692373		-0.212638	0.701651		-0.217355	0.664269		-0.210835	0.67538		-0.208165	0.692953		-0.214724	0.682317		-0.207738	0.690286		-0.211702	0.691534		-0.206627	0.689039		-0.209106	0.692234		-0.212497	0.674515		-0.209619	0.716271		-0.213347	0.680762		-0.208812	0.692589		-0.211629	0.679597
-0.20534	0.709099		-0.198521	0.723775		-0.203115	0.715318		-0.206385	0.706764		-0.209856	0.674765		-0.205208	0.699919		-0.200353	0.70383		-0.20785	0.693072		-0.200551	0.713362		-0.204515	0.699628		-0.201939	0.707708		-0.203788	0.715847		-0.204371	0.683475		-0.204934	0.730122		-0.207411	0.692384		-0.204745	0.703541		-0.204129	0.695278
-0.198777	0.721416		-0.194149	0.73663		-0.199053	0.721164		-0.198573	0.720719		-0.202356	0.696958		-0.200837	0.718724		-0.192853	0.722422		-0.200037	0.712056		-0.195863	0.734493		-0.197328	0.717145		-0.19725	0.71427		-0.199417	0.732941		-0.198119	0.710497		-0.197435	0.745696		-0.199286	0.705698		-0.199123	0.720524		-0.196316	0.72453
-0.190652	0.731602		-0.188836	0.753176		-0.192179	0.731		-0.192324	0.732474		-0.197355	0.718001		-0.194897	0.736291		-0.188477	0.75158		-0.194411	0.724563		-0.190863	0.74591		-0.192331	0.737065		-0.189751	0.728991		-0.193168	0.740911		-0.193747	0.738002		-0.189935	0.75219		-0.192721	0.73091		-0.190997	0.738042		-0.191628	0.746351
-0.185027	0.756626		-0.181023	0.766185		-0.184679	0.757538		-0.187949	0.757011		-0.192981	0.733018		-0.186772	0.738316		-0.184415	0.751639		-0.190348	0.739163		-0.183364	0.756711		-0.187952	0.754663		-0.181938	0.75463		-0.185356	0.753424		-0.188121	0.743927		-0.18493	0.779706		-0.188345	0.748227		-0.184436	0.755181		-0.187565	0.750584
-0.181277	0.772745		-0.173836	0.779763		-0.179365	0.779467		-0.182326	0.766025		-0.185792	0.749748		-0.180523	0.759379		-0.177541	0.763782		-0.183787	0.751287		-0.175862	0.783305		-0.181078	0.763987		-0.176941	0.764069		-0.178795	0.766562		-0.180308	0.757461		-0.180559	0.789378		-0.183035	0.760881		-0.180057	0.779395		-0.181003	0.759045
-0.175652	0.781072		-0.169774	0.800456		-0.174992	0.78211		-0.174514	0.781188		-0.17798	0.767449		-0.176148	0.781611		-0.170352	0.792577		-0.175974	0.772639		-0.171488	0.798842		-0.172952	0.783188		-0.172565	0.775778		-0.174415	0.783221		-0.173434	0.779184		-0.173372	0.79359		-0.175223	0.77445		-0.174747	0.78064		-0.173504	0.776713
-0.16784	0.791401		-0.165398	0.812236		-0.168741	0.796865		-0.167636	0.811302		-0.172668	0.774479		-0.170834	0.789031		-0.16504	0.811891		-0.169726	0.792604		-0.167426	0.79701		-0.16733	0.802117		-0.165378	0.791457		-0.169105	0.794006		-0.169059	0.788822		-0.165246	0.810154		-0.168349	0.790439		-0.166621	0.796576		-0.168191	0.789881
-0.161589	0.809127		-0.158211	0.813883		-0.160929	0.818097		-0.16326	0.824337		-0.168605	0.787686		-0.162709	0.798086		-0.160352	0.813435		-0.165663	0.794613		-0.16055	0.807721		-0.163263	0.817528		-0.157253	0.809597		-0.161293	0.814836		-0.164058	0.805044		-0.160554	0.82676		-0.163973	0.801018		-0.159747	0.809681		-0.163816	0.804615
-0.157215	0.818894		-0.151024	0.832397		-0.154678	0.834673		-0.15795	0.832416		-0.161731	0.800475		-0.155835	0.815218		-0.15379	0.825782		-0.159411	0.8219		-0.15305	0.828944		-0.157015	0.821208		-0.152565	0.834359		-0.154419	0.825199		-0.155932	0.813493		-0.156808	0.828964		-0.158659	0.813238		-0.156001	0.825856		-0.157566	0.81073
-0.151902	0.828095		-0.146023	0.846759		-0.150616	0.852555		-0.149825	0.840538		-0.153606	0.81762		-0.151459	0.837891		-0.145978	0.840844		-0.151286	0.829963		-0.148051	0.851639		-0.148889	0.833976		-0.148815	0.839559		-0.150039	0.842497		-0.148746	0.83234		-0.150247	0.831347		-0.150847	0.816691		-0.151309	0.854329		-0.149441	0.834698
-0.144089	0.842264		-0.141335	0.874218		-0.144678	0.849294		-0.142638	0.864974		-0.148605	0.836092		-0.146462	0.844873		-0.14004	0.846136		-0.145037	0.834854		-0.143676	0.860041		-0.142954	0.851439		-0.14225	0.839882		-0.145042	0.860948		-0.144683	0.838841		-0.142434	0.835638		-0.14366	0.841792		-0.143809	0.858716		-0.143191	0.850354
-0.136902	0.857128		-0.134461	0.875881		-0.136866	0.865057		-0.138888	0.884576		-0.144855	0.854639		-0.138337	0.856223		-0.135978	0.863488		-0.1416	0.852653		-0.1368	0.872579		-0.138887	0.861788		-0.134437	0.857066		-0.136917	0.871381		-0.140307	0.854771		-0.137117	0.871144		-0.139597	0.8677		-0.136623	0.874638		-0.138816	0.864877
-0.132527	0.860005		-0.126336	0.889764		-0.129992	0.876371		-0.1342	0.881249		-0.138605	0.85712		-0.131146	0.864116		-0.13004	0.876865		-0.136286	0.865788		-0.128987	0.879375		-0.132639	0.875558		-0.129127	0.875586		-0.12973	0.878264		-0.133121	0.861759		-0.132745	0.882698		-0.135222	0.872417		-0.132251	0.88791		-0.133504	0.868111
-0.12784	0.87956		-0.121022	0.904173		-0.125929	0.886189		-0.1267	0.887923		-0.130792	0.86728		-0.127396	0.886393		-0.121915	0.878739		-0.128474	0.874645		-0.123049	0.894511		-0.124201	0.889546		-0.125065	0.886413		-0.125976	0.894316		-0.125934	0.87503		-0.126809	0.883273		-0.128035	0.882244		-0.127559	0.895207		-0.125378	0.868437
-0.120027	0.89112		-0.116959	0.913113		-0.120304	0.887123		-0.119826	0.906743		-0.125167	0.880807		-0.123025	0.892217		-0.115352	0.896042		-0.122225	0.895731		-0.118987	0.904785		-0.118265	0.901861		-0.118812	0.893708		-0.121292	0.904027		-0.121245	0.900137		-0.118684	0.904282		-0.120848	0.88699		-0.120372	0.897137		-0.118503	0.88437
-0.112527	0.895974		-0.110398	0.915932		-0.112179	0.907159		-0.115138	0.914419		-0.121105	0.885031		-0.115521	0.895165		-0.111289	0.900407		-0.11785	0.905259		-0.113051	0.904329		-0.114824	0.90322		-0.110691	0.907831		-0.113792	0.910946		-0.116557	0.905263		-0.112428	0.936024		-0.115847	0.906275		-0.112559	0.908917		-0.114441	0.891566
-0.107839	0.91694		-0.102273	0.926164		-0.105616	0.919447		-0.11045	0.913372		-0.115167	0.902353		-0.108647	0.910721		-0.105664	0.919051		-0.112536	0.923542		-0.104926	0.921789		-0.109514	0.905864		-0.104439	0.915718		-0.106918	0.936749		-0.10937	0.911189		-0.108056	0.918364		-0.111159	0.911206		-0.107249	0.927648		-0.109129	0.89797
-0.103152	0.930287		-0.0963368	0.941728		-0.101866	0.940098		-0.103263	0.93209		-0.107355	0.914961		-0.103646	0.91995		-0.0975388	0.92222		-0.105036	0.92481		-0.0986755	0.924713		-0.101702	0.924037		-0.100376	0.932078		-0.102226	0.93854		-0.101558	0.91859		-0.102746	0.929371		-0.104285	0.921735		-0.10287	0.94115		-0.101003	0.91077
-0.0956521	0.935626		-0.0922742	0.951329		-0.0971775	0.942855		-0.0954502	0.940427		-0.100481	0.917494		-0.0989614	0.930438		-0.0909775	0.924811		-0.0975365	0.936393		-0.0946128	0.930986		-0.0951403	0.937304		-0.0947532	0.929815		-0.0975415	0.937161		-0.0962476	0.926953		-0.0949338	0.937733		-0.0964722	0.931539		-0.0963088	0.951372		-0.0941283	0.93088
-0.0881524	0.944276		-0.0860219	0.949531		-0.089365	0.944424		-0.0901363	0.948534		-0.0961051	0.933033		-0.0920835	0.942118		-0.0872277	0.942375		-0.0928483	0.950312		-0.0886752	0.945477		-0.0910738	0.946801		-0.0866279	0.93395		-0.0903546	0.951789		-0.092185	0.928007		-0.0880598	0.941603		-0.0908456	0.943402		-0.0881835	0.943518		-0.0903784	0.932215
-0.0834642	0.952816		-0.0775838	0.952992		-0.0828037	0.947546		-0.0857609	0.951262		-0.0907931	0.934075		-0.084271	0.950984		-0.0822266	0.945801		-0.0884728	0.937653		-0.0805499	0.948056		-0.0857637	0.950961		-0.07975	0.955752		-0.0825421	0.954316		-0.0856199	0.933572		-0.0836805	0.943541		-0.0867829	0.947392		-0.0825606	0.946553		-0.0856911	0.934886
-0.0797143	0.952899		-0.0719609	0.96323		-0.0781155	0.958264		-0.0791996	0.956744		-0.0832934	0.931908		-0.0786482	0.958767		-0.0747269	0.960145		-0.0809731	0.94237		-0.0742995	0.95708		-0.0782641	0.948227		-0.0756873	0.954988		-0.0772321	0.969836		-0.0774946	0.941976		-0.0786832	0.956534		-0.0802216	0.953091		-0.0784942	0.958307		-0.0781905	0.942022
-0.0728393	0.955653		-0.0682111	0.983702		-0.0731163	0.973347		-0.0710743	0.965445		-0.0761046	0.949119		-0.0745855	0.962423		-0.0678528	0.958316		-0.0731606	0.971509		-0.0705497	0.962274		-0.0707644	0.963691		-0.0703773	0.963064		-0.0728528	0.969816		-0.0715589	0.950598		-0.0705579	0.95793		-0.0720963	0.964377		-0.0719329	0.963162		-0.0713164	0.951091
-0.0653396	0.963886		-0.0625844	0.970716		-0.0659275	0.983253		-0.0654476	0.984681		-0.0717311	0.955738		-0.0680242	0.967435		-0.0631646	0.966237		-0.0681634	0.97114		-0.0655505	0.975138		-0.0660799	0.97846		-0.062252	0.968666		-0.0662915	0.9729		-0.0674963	0.959278		-0.063371	0.955033		-0.0661607	0.966363		-0.0638076	0.972366		-0.0666281	0.950866
-0.0600267	0.970004		-0.0550847	0.970326		-0.0584278	0.982635		-0.0613849	0.99403		-0.06673	0.965211		-0.0602117	0.974413		-0.0584763	0.967548		-0.0637879	0.970619		-0.057738	0.975085		-0.0613878	0.984116		-0.0553779	0.96746		-0.058479	0.976907		-0.061244	0.979843		-0.0596174	0.973846		-0.0624108	0.97705		-0.0581847	0.986308		-0.0619408	0.959371
-0.0556522	0.969312		-0.0485234	0.98279		-0.0531159	0.977081		-0.0548237	0.996924		-0.0589175	0.9697		-0.0542723	0.980573		-0.0512894	0.976552		-0.0565972	0.981869		-0.0511748	0.980699		-0.0542009	0.983328		-0.051628	0.97585		-0.0528562	0.976455		-0.0528097	0.981783		-0.0549329	0.989495		-0.0561585	0.981737		-0.0547515	0.986873		-0.054753	0.964462
-0.0490899	0.972887		-0.044148	0.983121		-0.0487404	0.9871		-0.0466984	0.997141		-0.0514178	0.968648		-0.0502096	0.981462		-0.0434769	0.979493		-0.0484757	0.992436		-0.0464885	0.987696		-0.0463884	0.993687		-0.0469398	0.978068		-0.0487897	0.975808		-0.047183	0.978446		-0.0474332	0.993887		-0.0477204	0.977308		-0.0488082	0.99151		-0.0469405	0.971703
-0.0412774	0.984367		-0.0388341	0.989939		-0.0421791	0.995771		-0.0410755	0.985807		-0.047668	0.971987		-0.0439611	0.988895		-0.0384777	0.97607		-0.0437874	0.992797		-0.0414874	0.990632		-0.0413912	0.989183		-0.0394401	0.974791		-0.0422284	0.990809		-0.043746	0.98523		-0.0405591	0.985508		-0.0417847	0.973045		-0.0409957	1.0001		-0.0416285	0.979028
-0.0353399	0.973418		-0.0310216	0.995753		-0.0340538	0.996095		-0.0373257	1.00561		-0.0432925	0.994666		-0.035523	0.985263		-0.0341023	1.00039		-0.0403504	0.979479		-0.0343005	0.99411		-0.0370119	0.987737		-0.0322532	0.977794		-0.0341031	1.00439		-0.0381193	0.994568		-0.0355543	0.965698		-0.0383477	0.978465		-0.03506	0.988109		-0.037253	0.987208
-0.0309644	0.991927		-0.0238347	0.997872		-0.028429	0.996408		-0.031699	1.00212		-0.0361056	0.984476		-0.0295835	0.990409		-0.0272263	1.00689		-0.0337853	0.995309		-0.0268008	0.985087		-0.029825	0.991066		-0.0278777	0.98898		-0.0284803	1.00116		-0.0303068	0.987319		-0.0308698	0.980718		-0.032721	0.989952		-0.0306884	0.989726		-0.0306908	0.9943
-0.0250268	1.00165		-0.0191464	0.997902		-0.0243664	1.00357		-0.0238865	0.999977		-0.0289187	0.982183		-0.0261465	0.997783		-0.0194138	1.00701		-0.0259728	1.00263		-0.0217998	1.00494		-0.0216997	1.00124		-0.0231895	0.996409		-0.0247266	1.00268		-0.0240583	0.986258		-0.0239957	0.969172		-0.0252213	0.990485		-0.0250579	0.996665		-0.0225655	0.997009
-0.0172143	0.996383		-0.014462	0.990343		-0.0174904	1.00062		-0.0179508	1.00982		-0.0239177	0.984416		-0.0205236	0.994359		-0.0141018	1.00114		-0.0206628	1.00459		-0.0171134	1.00232		-0.0170153	1.00002		-0.0160026	0.993849		-0.0191037	1.00619		-0.0196829	0.990823		-0.0161832	0.979978		-0.0186601	0.99928		-0.0172454	1.00153		-0.0169407	0.988533
-0.0106521	0.997217		-0.00695848	0.999903		-0.00936509	0.999214		-0.0135754	1.00871		-0.0195422	0.982443		-0.0127111	1.00768		-0.00972637	0.992327		-0.0162873	1.00829		-0.0102374	0.999719		-0.0135744	0.999725		-0.00819007	1.00207		-0.0112912	1.02116		-0.014369	1.00188		-0.0108655	0.978507		-0.0142846	0.999202		-0.0103713	1.00859		-0.0128781	0.981877
-0.00627663	1.00435		0.000541216	1		-0.00405312	0.990214		-0.00794867	1.00877		-0.0126681	0.998613		-0.00645884	1.01379		-0.00285229	1		-0.010035	1.00112		-0.00242493	1		-0.00701313	1.00907		-0.00287619	0.996408		-0.00504275	1.01352		-0.00655648	0.997984		-0.0068067	0.977985		-0.00928353	1.00527		-0.00599966	0.998346		-0.00631585	0.989842
-0.000651864	1		0.00553847	0.994909		-0.000303276	1		-0.000448977	1		-0.00485562	1.00938		-0.00208338	1		0.00527302	0.995163		-0.00222251	1		0.00288704	0.997168		0.000799367	1		0.00149926	1		-0.000663481	1		0.000630405	1		-0.000245422	1		-0.00147103	1		-0.000994779	1		0.00180945	1
0.00747344	0.995754		0.00991393	0.995177		0.0056343	1.00806		0.00673791	1.00127		0.000769151	1		0.00322668	0.995821		0.010585	0.998317		0.00433877	1.00672		0.00694969	0.995497		0.00610943	1.00008		0.00806054	1.0026		0.00464658	0.998606		0.00500586	1.00281		0.00787988	0.988453		0.00602867	0.993524		0.00681772	1.00658		0.00743422	1.00338
0.0140357	0.993997		0.0171008	1.00086		0.013134	1.0035		0.0114262	1.00642		0.00514461	0.998318		0.0110392	0.996426		0.014022	0.998769		0.00871423	0.998166		0.0141366	1.00293		0.0104887	1.00283		0.015873	0.997758		0.0124591	1.00503		0.0100031	0.998022		0.0138156	0.98002		0.0107169	0.993404		0.0140046	1.01031		0.0111841	0.984552
0.0174727	0.99915		0.0249133	0.997497		0.0190716	0.999731		0.0161144	1.00457		0.0117078	0.995693		0.0182261	0.989296		0.0202724	0.987546		0.0140243	1.00046		0.0222619	1.00729		0.0167372	0.989889		0.0218125	0.997827		0.019646	0.988137		0.0175028	0.99242		0.0175692	0.993743		0.0154014	0.998222		0.0186891	1.00078		0.0168088	0.985431
0.0224728	0.994047		0.0296016	0.994376		0.023447	0.995862		0.0239269	1.00535		0.0198312	0.985558		0.0226015	0.984646		0.0277721	1.00056		0.0218368	1.00337		0.027263	1.0019		0.0245497	0.996275		0.0258752	0.992771		0.0240176	0.999596		0.0250025	0.990517		0.0241305	0.986355		0.0229011	0.990535		0.0233735	0.981913		0.0246213	0.991577
0.0302853	0.986495		0.0333514	0.991811		0.0290718	1.00446		0.0314266	1.00716		0.0257688	0.988185		0.0276026	0.994164		0.0337097	0.985439		0.0287147	1.00167		0.0310128	0.991393		0.0307981	0.993336		0.0321237	0.988688		0.0290225	1.00367		0.0300036	0.991296		0.0325686	0.976674		0.0304046	0.995859		0.0308808	0.981674		0.0308717	0.991737
0.0371604	0.988446		0.0399165	0.994449		0.0368843	0.998563		0.0358021	1.01314		0.0298314	0.983141		0.0347895	0.994789		0.0380851	0.995705		0.0330901	0.994518		0.0372632	0.998906		0.0351698	0.98911		0.0405618	0.993808		0.0365222	0.990903		0.034379	0.983778		0.0381915	0.981847		0.0354018	0.993314		0.0386933	0.987393		0.0352462	0.988267
0.0415358	0.984916		0.047729	0.993292		0.0440712	0.992403		0.0404865	1.00983		0.035769	0.986234		0.042602	0.989042		0.0437099	0.985997		0.0384002	0.992299		0.0447629	0.992154		0.0408003	0.994441		0.0461846	0.978426		0.0440219	0.992579		0.0415659	0.97754		0.0416323	0.972894		0.0397773	0.984458		0.043065	1.00308		0.0405591	0.979574
0.0465359	0.982028		0.0530391	0.98912		0.0484466	0.992735		0.0479901	0.997517		0.0442071	0.989087		0.0476031	0.976593		0.0515224	0.969189		0.0462127	0.989389		0.0507005	0.976587		0.0486128	0.988193		0.0496217	0.972841		0.0487063	0.989689		0.0493784	0.979555		0.0472552	0.979978		0.0469642	0.977017		0.0471238	1.00138		0.0483716	0.976729
0.0537228	0.971713		0.0574145	0.976763		0.0531349	0.983418		0.0558026	0.988776		0.0501447	0.98385		0.0519785	0.984303		0.0583984	0.974455		0.0533996	0.9898		0.0547631	0.985753		0.0554869	0.987406		0.0555612	0.977008		0.0530856	0.995871		0.0540667	0.972434		0.0550677	0.981202		0.0550895	0.968369		0.0540055	0.988416		0.0555595	0.971774
0.0615353	0.972373		0.063663	0.970465		0.0609474	0.979063		0.0601742	0.989885		0.0535817	0.980608		0.0591654	0.98899		0.0627719	0.970345		0.0571494	0.98541		0.0607007	0.979371		0.0598585	0.990722		0.0633737	0.970486		0.0605853	0.976724		0.0581293	0.966251		0.0613162	0.964416		0.0597778	0.970505		0.0611924	0.976767		0.059934	0.97073
0.0665354	0.967696		0.0717883	0.958316		0.0684471	0.972483		0.063924	0.984358		0.0592065	0.985125		0.0672907	0.982949		0.067773	0.970119		0.0615249	0.974485		0.0685132	0.965035		0.0651762	0.97974		0.0693093	0.958028		0.0683978	0.97134		0.0646906	0.965923		0.0656954	0.956573		0.0635276	0.965178		0.0665025	0.987292		0.0646213	0.974171
0.0705981	0.965311		0.0780406	0.959711		0.0728226	0.96659		0.0708019	0.979945		0.0667062	0.969691		0.071979	0.964743		0.0755855	0.961972		0.0690246	0.971291		0.0750745	0.965883		0.0729887	0.967645		0.0736848	0.955361		0.0730822	0.958845		0.0721903	0.951255		0.0713183	0.956655		0.0700889	0.967493		0.0708741	0.984296		0.0721219	0.966619
0.0774731	0.959758		0.0821033	0.965256		0.0775089	0.966684		0.0783016	0.974422		0.0732694	0.964512		0.075416	0.960547		0.0830852	0.953814		0.0762153	0.9726		0.0794499	0.957993		0.0801756	0.957138		0.0793115	0.960632		0.0768359	0.963617		0.0775042	0.93754		0.078818	0.971937		0.0775886	0.965806		0.077443	0.975936		0.0796216	0.959369
0.0855984	0.946687		0.0877261	0.954453		0.0853214	0.966092		0.0836117	0.967328		0.0776448	0.952571		0.0822901	0.960132		0.0874607	0.945146		0.0808997	0.953145		0.0847619	0.941998		0.0839216	0.952296		0.0868112	0.950326		0.0833972	0.967795		0.0818796	0.9433		0.0860049	0.956892		0.0829024	0.953143		0.0852555	0.969809		0.0846218	0.954904
0.0909104	0.935571		0.0958514	0.947849		0.0931339	0.949237		0.0879871	0.956226		0.082644	0.947428		0.0897898	0.946216		0.092147	0.945279		0.085588	0.944412		0.0925744	0.941335		0.0883009	0.943087		0.093998	0.945267		0.0912097	0.954644		0.0881281	0.936788		0.0903842	0.924275		0.0872779	0.935496		0.091504	0.942997		0.0889963	0.941394
0.0949731	0.935981		0.102726	0.936245		0.0971966	0.941373		0.0945522	0.943105		0.0901437	0.939136		0.0951037	0.932359		0.0999595	0.937171		0.0924621	0.940659		0.0997632	0.938813		0.0958006	0.95089		0.0983735	0.923185		0.0965197	0.945989		0.0959406	0.928308		0.0953814	0.926542		0.0935264	0.931951		0.0955628	0.943552		0.0964969	0.931191
0.101848	0.94053		0.106788	0.920802		0.101259	0.937265		0.102365	0.93909		0.0976453	0.938716		0.0994791	0.928922		0.107461	0.917853		0.100275	0.94043		0.104137	0.932545		0.102675	0.937006		0.103375	0.921667		0.100586	0.93202		0.102193	0.922968		0.102881	0.920245		0.101652	0.932434		0.101193	0.945039		0.104309	0.914585
0.109973	0.921642		0.112102	0.9148		0.108135	0.935389		0.108613	0.929781		0.102332	0.926342		0.105728	0.922916		0.111835	0.902009		0.105901	0.935975		0.108825	0.924258		0.107359	0.92371		0.110874	0.925236		0.107147	0.91884		0.106568	0.916512		0.110381	0.920629		0.107904	0.916759		0.109311	0.929374		0.108997	0.91346
0.115598	0.902986		0.120227	0.910416		0.115635	0.922223		0.112676	0.923064		0.106707	0.916018		0.113853	0.912737		0.115897	0.891752		0.109964	0.936688		0.116637	0.922123		0.112051	0.918709		0.118374	0.907857		0.11496	0.913568		0.112191	0.903697		0.115065	0.909376		0.112279	0.89513		0.11588	0.922435		0.112747	0.911373
0.119035	0.887451		0.127101	0.90242		0.120634	0.909529		0.118612	0.921882		0.114207	0.902217		0.120101	0.901363		0.122773	0.894119		0.116525	0.926488		0.124137	0.905424		0.119238	0.904555		0.123062	0.894506		0.121208	0.903235		0.120004	0.891074		0.119445	0.88849		0.117902	0.890883		0.119939	0.913768		0.119622	0.898896
0.124973	0.885811		0.130851	0.884015		0.12501	0.894156		0.126737	0.912821		0.122019	0.888878		0.124164	0.891553		0.130273	0.888946		0.124338	0.91668		0.1282	0.893465		0.127051	0.8968		0.127438	0.883928		0.125267	0.894351		0.126878	0.885829		0.126944	0.882508		0.126028	0.890085		0.125562	0.903865		0.127121	0.889371
0.132785	0.874733		0.13554	0.859629		0.131884	0.880123		0.133302	0.884845		0.12702	0.888175		0.129791	0.88239		0.135272	0.869335		0.130277	0.906138		0.132575	0.877906		0.132361	0.878134		0.134937	0.874779		0.131211	0.88212		0.13094	0.873702		0.134757	0.870881		0.132902	0.88346		0.133687	0.89306		0.132434	0.876099
0.138723	0.861092		0.143039	0.861254		0.139696	0.875987		0.137365	0.87526		0.131081	0.876994		0.137603	0.869404		0.139648	0.859579		0.13434	0.882517		0.139762	0.871402		0.136419	0.865802		0.14275	0.857625		0.139023	0.881597		0.136567	0.86471		0.139128	0.851232		0.136964	0.864851		0.140256	0.866302		0.136809	0.860022
0.143098	0.848123		0.150226	0.855624		0.145321	0.855369		0.142987	0.859487		0.13827	0.867166		0.144477	0.848379		0.146524	0.852933		0.140588	0.865119		0.146949	0.853641		0.143301	0.856088		0.147434	0.843406		0.145584	0.86897		0.144692	0.852927		0.142882	0.842907		0.142278	0.860897		0.144002	0.854302		0.143372	0.852655
0.148723	0.843557		0.154914	0.840121		0.149696	0.833384		0.151426	0.844885		0.146395	0.85576		0.14854	0.839977		0.154336	0.837587		0.149026	0.852661		0.15195	0.846938		0.151419	0.847644		0.151184	0.825867		0.149956	0.846421		0.151567	0.8417		0.149756	0.850503		0.150404	0.85122		0.148999	0.846566		0.151184	0.838808
0.156536	0.827851		0.159603	0.821992		0.155634	0.82897		0.157987	0.840863		0.151394	0.828684		0.154167	0.832409		0.159961	0.81175		0.154962	0.830654		0.156326	0.832542		0.157049	0.831638		0.158062	0.81983		0.155274	0.825877		0.155316	0.820792		0.157256	0.82879		0.157278	0.824014		0.156499	0.832005		0.157434	0.823989
0.163411	0.807861		0.16679	0.812184		0.163446	0.825315		0.161737	0.822997		0.154831	0.81713		0.162288	0.822912		0.164024	0.800945		0.158399	0.822423		0.1632	0.81492		0.161108	0.816956		0.165562	0.800575		0.163399	0.815094		0.160005	0.815654		0.162566	0.806035		0.161027	0.813329		0.163381	0.817596		0.161496	0.810821
0.167785	0.794338		0.174289	0.794313		0.17001	0.805364		0.166738	0.806934		0.161395	0.813118		0.169166	0.800237		0.170272	0.787756		0.164026	0.813632		0.171012	0.795576		0.167669	0.801251		0.170872	0.790806		0.16996	0.80122		0.167504	0.803944		0.166945	0.781177		0.165403	0.80298		0.167752	0.805548		0.167121	0.800869
0.173098	0.784883		0.179603	0.773036		0.174385	0.782043		0.174237	0.793826		0.169207	0.797466		0.172916	0.774787		0.178397	0.776465		0.171838	0.796113		0.176637	0.794262		0.175795	0.777943		0.174934	0.774913		0.173706	0.787067		0.174378	0.786835		0.173506	0.782677		0.172903	0.795331		0.172749	0.793802		0.175247	0.787679
0.180598	0.773159		0.183979	0.750124		0.18001	0.772207		0.181112	0.774087		0.174519	0.781376		0.177604	0.774234		0.184648	0.754163		0.178087	0.773109		0.1807	0.773895		0.181425	0.75697		0.1815	0.764221		0.178711	0.772265		0.179067	0.762566		0.181319	0.776949		0.180089	0.775317		0.179936	0.784654		0.181809	0.766789
0.188098	0.761129		0.19054	0.741416		0.188135	0.754673		0.1858	0.751951		0.178895	0.770168		0.185104	0.761942		0.18871	0.733606		0.182462	0.757124		0.187263	0.759362		0.184859	0.751691		0.189312	0.749377		0.186211	0.760235		0.183755	0.75673		0.187255	0.758986		0.184778	0.751739		0.187436	0.760475		0.185871	0.742918
0.192473	0.741918		0.198665	0.730676		0.194696	0.734395		0.190801	0.741151		0.185145	0.759982		0.191978	0.734436		0.194648	0.730875		0.187776	0.753256		0.195075	0.734211		0.190481	0.752635		0.195561	0.734405		0.193085	0.747577		0.190942	0.737884		0.191634	0.746823		0.189466	0.742126		0.192754	0.732772		0.191496	0.73135
0.19716	0.724236		0.204288	0.706803		0.198133	0.714797		0.197988	0.742099		0.192957	0.737626		0.196666	0.718138		0.202773	0.716724		0.195589	0.729779		0.201013	0.717897		0.198294	0.730549		0.199623	0.714536		0.197457	0.733606		0.198754	0.720748		0.197257	0.749294		0.196653	0.731133		0.197125	0.717596		0.199622	0.72009
0.204973	0.706136		0.208351	0.696362		0.203135	0.713034		0.2058	0.728887		0.199208	0.711224		0.201351	0.703346		0.209024	0.693743		0.202463	0.714493		0.205076	0.70066		0.20455	0.703728		0.20525	0.69974		0.202462	0.713212		0.204068	0.694581		0.205069	0.734399		0.204153	0.707501		0.203999	0.711607		0.206497	0.698193
0.212785	0.689765		0.214916	0.684662		0.210947	0.701261		0.210801	0.703058		0.203581	0.695228		0.208541	0.691314		0.212461	0.674281		0.207151	0.694337		0.211324	0.695719		0.208922	0.688248		0.213375	0.684329		0.209648	0.693823		0.20844	0.681481		0.211943	0.702499		0.209779	0.68337		0.211812	0.70165		0.210246	0.672646
0.216848	0.672028		0.223354	0.665387		0.21751	0.676468		0.215177	0.682451		0.209206	0.68337		0.216354	0.677017		0.217773	0.657691		0.212152	0.681067		0.219449	0.679489		0.214232	0.677044		0.219936	0.657384		0.217148	0.670013		0.215005	0.67128		0.216002	0.68308		0.213842	0.666877		0.217442	0.675067		0.214934	0.67095
0.220911	0.652271		0.228977	0.653298		0.222197	0.664102		0.222051	0.67249		0.217019	0.677465		0.221664	0.651429		0.225272	0.640776		0.219652	0.666826		0.2257	0.654112		0.222044	0.66608		0.223999	0.635906		0.222458	0.656491		0.222817	0.664054		0.22132	0.673333		0.220403	0.6625		0.221188	0.652456		0.222746	0.659426
0.228098	0.638976		0.232414	0.632755		0.227198	0.648272		0.230176	0.649513		0.223895	0.647773		0.226039	0.63531		0.231836	0.621136		0.227151	0.642689		0.229137	0.627836		0.229239	0.643782		0.229622	0.621407		0.226517	0.644326		0.228753	0.640038		0.229445	0.66779		0.228529	0.640568		0.228063	0.656762		0.229621	0.636807
0.235598	0.62535		0.238353	0.611159		0.234385	0.632473		0.23549	0.628881		0.22827	0.625724		0.232601	0.625147		0.236522	0.606896		0.232152	0.629338		0.234762	0.624029		0.23361	0.616284		0.23806	0.615882		0.233399	0.627696		0.232816	0.620389		0.236319	0.637757		0.234464	0.620871		0.236501	0.630842		0.23431	0.617394
0.240598	0.606221		0.245853	0.597533		0.241884	0.617794		0.239549	0.618545		0.233269	0.615865		0.240726	0.603653		0.241523	0.597435		0.236524	0.61705		0.242263	0.608583		0.238608	0.601619		0.244625	0.592824		0.241524	0.614492		0.239068	0.607759		0.240065	0.625347		0.238527	0.599507		0.241818	0.612062		0.238997	0.604108
0.244973	0.59668		0.251789	0.571851		0.246883	0.587203		0.246427	0.604124		0.241395	0.601624		0.246353	0.581153		0.24871	0.592776		0.243715	0.605418		0.248512	0.589181		0.246107	0.593381		0.248375	0.574396		0.246834	0.59853		0.247502	0.586047		0.244757	0.622471		0.244779	0.591832		0.245252	0.597412		0.246184	0.592635
0.251848	0.580863		0.256164	0.564517		0.251572	0.56924		0.254552	0.583093		0.248581	0.578318		0.250415	0.575216		0.25621	0.569155		0.25184	0.580233		0.2532	0.579846		0.253607	0.573111		0.253059	0.570781		0.250893	0.580239		0.253129	0.559186		0.252257	0.591855		0.253213	0.584962		0.2515	0.574429		0.253996	0.577826
0.25966	0.560933		0.261791	0.548601		0.258448	0.562946		0.259862	0.56442		0.252331	0.567838		0.256977	0.570178		0.261211	0.544942		0.256212	0.562444		0.258512	0.559806		0.258299	0.552599		0.260559	0.562376		0.257767	0.569759		0.256566	0.555729		0.259444	0.574229		0.25884	0.560342		0.259	0.5665		0.259309	0.555072
0.265598	0.538936		0.269603	0.537638		0.266571	0.546846		0.263299	0.546138		0.25702	0.555269		0.265102	0.543033		0.265897	0.525011		0.259962	0.545234		0.266012	0.544264		0.262671	0.547353		0.26775	0.533793		0.265892	0.553275		0.262506	0.554285		0.264128	0.568183		0.262277	0.54597		0.264943	0.549249		0.263372	0.534429
0.269973	0.518011		0.27679	0.519924		0.271885	0.52286		0.269551	0.532405		0.264519	0.542227		0.270728	0.517397		0.272773	0.515647		0.26684	0.534532		0.273513	0.52824		0.27017	0.534359		0.272434	0.514488		0.271523	0.530936		0.270005	0.533909		0.26882	0.553128		0.268217	0.534814		0.269315	0.538168		0.270247	0.525869
0.275911	0.510186		0.281166	0.4949		0.275948	0.51168		0.277051	0.517434		0.271395	0.524406		0.274478	0.504368		0.280585	0.504921		0.274339	0.525581		0.278199	0.504856		0.277983	0.516626		0.277123	0.515419		0.274956	0.511022		0.275941	0.506347		0.276007	0.539984		0.275716	0.517251		0.27525	0.524089		0.278371	0.509546
0.284035	0.494718		0.286163	0.483198		0.282822	0.497681		0.282987	0.506807		0.276082	0.506043		0.280101	0.494843		0.285897	0.483149		0.279649	0.507036		0.282888	0.491346		0.282675	0.493847		0.284309	0.499569		0.280899	0.496505		0.280316	0.498889		0.28382	0.524658		0.281652	0.492754		0.283063	0.505243		0.283997	0.486053
0.290286	0.475656		0.293666	0.472326		0.290947	0.475209		0.287362	0.492429		0.28077	0.493034		0.287914	0.48145		0.28996	0.468386		0.284025	0.490465		0.289762	0.483533		0.286421	0.47833		0.292122	0.476316		0.288712	0.484726		0.285943	0.489724		0.28913	0.506068		0.286027	0.480232		0.289624	0.48108		0.288059	0.468973
0.294348	0.464478		0.301166	0.452338		0.296259	0.457893		0.292989	0.481051		0.287644	0.471223		0.294166	0.461606		0.296836	0.461291		0.29059	0.466163		0.297574	0.461974		0.293295	0.469707		0.297123	0.449569		0.294647	0.471288		0.293756	0.466583		0.293509	0.503347		0.291654	0.469799		0.294003	0.45996		0.294622	0.460127
0.300286	0.455781		0.305851	0.433917		0.299696	0.444265		0.300801	0.466266		0.295456	0.463776		0.298541	0.446174		0.305272	0.436869		0.298402	0.455227		0.302888	0.440294		0.300795	0.45479		0.301499	0.437493		0.298706	0.455279		0.30063	0.455087		0.30007	0.484243		0.299467	0.453939		0.299001	0.453149		0.303059	0.449789
0.30841	0.438859		0.310539	0.419393		0.305946	0.433984		0.307676	0.452358		0.301081	0.446349		0.304164	0.445241		0.310273	0.425504		0.304651	0.436445		0.306949	0.429926		0.306112	0.433652		0.30806	0.431665		0.304337	0.442533		0.305318	0.434819		0.307883	0.462837		0.306341	0.434681		0.306813	0.444354		0.308684	0.429935
0.314973	0.415661		0.318038	0.418732		0.313759	0.415306		0.312364	0.426138		0.305144	0.432792		0.311977	0.430479		0.31371	0.411575		0.308713	0.417474		0.314138	0.426876		0.310484	0.423314		0.316185	0.416374		0.312149	0.430473		0.310315	0.41597		0.313506	0.449104		0.311029	0.424923		0.314	0.419963		0.312122	0.413175
0.318723	0.397126		0.325851	0.398651		0.319696	0.404995		0.317365	0.420309		0.311707	0.425133		0.319164	0.404065		0.319961	0.405184		0.31434	0.413142		0.322263	0.40792		0.317045	0.405526		0.321812	0.40071		0.319336	0.409165		0.317815	0.412917		0.317565	0.431845		0.316026	0.410226		0.318692	0.412941		0.318059	0.407424
0.323723	0.39241		0.330226	0.376879		0.323759	0.388654		0.324865	0.404182		0.319832	0.401323		0.323539	0.390374		0.327773	0.382502		0.322462	0.398512		0.327262	0.381063		0.324858	0.39116		0.325874	0.384163		0.323708	0.391228		0.325318	0.389299		0.324446	0.422501		0.323526	0.394501		0.323377	0.408539		0.325872	0.386028
0.331536	0.381028		0.334289	0.366781		0.329697	0.373973		0.332364	0.379941		0.32577	0.381777		0.328227	0.381041		0.333398	0.36806		0.32934	0.38152		0.330699	0.368537		0.331106	0.377017		0.332436	0.372383		0.328705	0.384695		0.330003	0.379811		0.332572	0.402147		0.331029	0.378966		0.331189	0.388961		0.331809	0.370684
0.338098	0.368044		0.341163	0.357623		0.337509	0.367808		0.337053	0.362336		0.329833	0.369025		0.33604	0.372903		0.337773	0.360476		0.333402	0.362302		0.337262	0.360937		0.335173	0.357689		0.340561	0.358899		0.336518	0.371443		0.334691	0.366751		0.338195	0.389246		0.335714	0.3594		0.338689	0.364448		0.336184	0.351417
0.342473	0.348206		0.348663	0.340551		0.344385	0.351381		0.341737	0.355792		0.336083	0.368395		0.34354	0.351845		0.343711	0.345295		0.338712	0.354135		0.344762	0.347514		0.340796	0.357346		0.346188	0.337195		0.344017	0.357222		0.342191	0.359177		0.341628	0.387017		0.340402	0.345207		0.342755	0.345832		0.341809	0.345357
0.347473	0.336497		0.353977	0.322661		0.348446	0.331589		0.349237	0.343792		0.344206	0.351464		0.348228	0.330376		0.351524	0.327804		0.346838	0.343977		0.350387	0.333521		0.348921	0.344172		0.349625	0.322124		0.348397	0.338995		0.350003	0.342006		0.347571	0.391523		0.347902	0.342603		0.346814	0.343626		0.349621	0.333588
0.354973	0.329063		0.358039	0.311387		0.35376	0.322345		0.356736	0.321876		0.350144	0.336426		0.352916	0.324274		0.358398	0.313791		0.353712	0.325636		0.354762	0.32263		0.355482	0.323387		0.35556	0.315381		0.353081	0.323924		0.354379	0.320492		0.355384	0.368842		0.355714	0.324733		0.354001	0.331348		0.356496	0.316549
0.362473	0.302755		0.364601	0.311445		0.361572	0.305661		0.361112	0.308895		0.353583	0.316831		0.360416	0.313668		0.362773	0.292444		0.357465	0.304349		0.3607	0.309992		0.359549	0.306265		0.363373	0.302916		0.360894	0.313292		0.358441	0.307596		0.361319	0.340574		0.36009	0.311467		0.361501	0.315044		0.360872	0.304778
0.367473	0.287234		0.372413	0.292925		0.368759	0.291224		0.365175	0.29784		0.359208	0.308276		0.368228	0.299697		0.368085	0.286213		0.36215	0.296484		0.368825	0.295991		0.365172	0.296367		0.369312	0.28856		0.368393	0.298549		0.365315	0.300562		0.365691	0.321337		0.36384	0.298971		0.366506	0.297894		0.366184	0.288451
0.37216	0.280918		0.378665	0.272428		0.373135	0.275757		0.372052	0.294661		0.36702	0.291132		0.372604	0.283642		0.375585	0.274717		0.369649	0.289367		0.375387	0.278068		0.373297	0.285077		0.373375	0.269392		0.37246	0.28336		0.372502	0.286234		0.371321	0.314245		0.370714	0.289367		0.370877	0.287075		0.373684	0.28169
0.379035	0.270396		0.382728	0.256733		0.378134	0.267605		0.379552	0.282953		0.373269	0.27523		0.376354	0.272156		0.382774	0.254669		0.37684	0.270496		0.379449	0.260174		0.380171	0.26573		0.379311	0.263205		0.376519	0.271583		0.377816	0.27003		0.378821	0.299287		0.378213	0.274368		0.377751	0.279771		0.381184	0.263772
0.386848	0.248972		0.388664	0.249575		0.385946	0.257508		0.384862	0.266488		0.377644	0.263043		0.383541	0.260406		0.387147	0.241516		0.381212	0.256466		0.384763	0.253722		0.383925	0.248593		0.387123	0.251919		0.383393	0.262592		0.382192	0.255531		0.386008	0.284437		0.383527	0.25733		0.385564	0.268232		0.385559	0.244564
0.392161	0.231686		0.396789	0.232696		0.393446	0.239032		0.389238	0.247333		0.382958	0.250879		0.39104	0.242463		0.392148	0.233388		0.3859	0.249912		0.392886	0.24588		0.388609	0.24162		0.393997	0.235721		0.390892	0.245985		0.388753	0.244597		0.39038	0.272984		0.387903	0.2471		0.391499	0.246998		0.390247	0.232458
0.396223	0.227111		0.40335	0.214966		0.397509	0.224749		0.395799	0.23498		0.390458	0.239584		0.396354	0.224345		0.399961	0.226677		0.3934	0.236518		0.399762	0.227375		0.396109	0.238153		0.398373	0.214862		0.39621	0.229862		0.396565	0.22966		0.395384	0.274414		0.394464	0.234252		0.395253	0.238852		0.398059	0.224616
0.40341	0.219362		0.407413	0.202347		0.401571	0.218859		0.403924	0.225061		0.397957	0.223694		0.400726	0.215226		0.40746	0.208521		0.401212	0.217957		0.403825	0.211597		0.402983	0.223767		0.403374	0.205117		0.400582	0.219342		0.402818	0.210518		0.402884	0.263088		0.402277	0.221276		0.401502	0.230788		0.405872	0.208296
0.411536	0.202222		0.41304	0.192349		0.40876	0.208702		0.409864	0.205315		0.402644	0.209442		0.407291	0.207638		0.41121	0.192682		0.406213	0.202842		0.409137	0.201225		0.407362	0.205733		0.411186	0.200675		0.407143	0.210707		0.40688	0.196636		0.410384	0.245917		0.408529	0.210426		0.409627	0.211187		0.409934	0.195046
0.416536	0.185742		0.421165	0.181831		0.41626	0.19113		0.413926	0.195057		0.407332	0.198837		0.415103	0.192282		0.415586	0.184046		0.410276	0.192385		0.41695	0.190431		0.412359	0.188095		0.418373	0.188861		0.414955	0.197894		0.412816	0.198517		0.415068	0.228677		0.412591	0.193708		0.415875	0.191615		0.413997	0.183038
0.420286	0.173812		0.427726	0.16552		0.420946	0.177392		0.420175	0.186328		0.414519	0.190361		0.421039	0.174754		0.422773	0.176751		0.41715	0.187338		0.424136	0.175782		0.419546	0.183515		0.422749	0.171271		0.420899	0.179839		0.420629	0.18149		0.419753	0.212326		0.418214	0.184587		0.419942	0.184698		0.420871	0.174746
0.426535	0.164144		0.431476	0.156547		0.425634	0.164183		0.427987	0.173957		0.422331	0.171995		0.425102	0.165252		0.429959	0.160964		0.425275	0.171028		0.428199	0.161451		0.427359	0.168514		0.42775	0.162098		0.42527	0.170871		0.42719	0.165866		0.427252	0.216797		0.42634	0.171605		0.425877	0.176718		0.428372	0.158991
0.434036	0.153914		0.436477	0.151216		0.432508	0.153553		0.43424	0.155586		0.42702	0.158012		0.431041	0.157667		0.434961	0.148547		0.430902	0.152575		0.432575	0.156296		0.432364	0.157999		0.435249	0.151356		0.431206	0.163509		0.431253	0.154108		0.435065	0.199794		0.432901	0.158123		0.434003	0.166321		0.433372	0.141902
0.439973	0.140642		0.443977	0.142764		0.440321	0.140997		0.438615	0.143601		0.431395	0.152843		0.439166	0.15051		0.439336	0.14205		0.434965	0.143721		0.440074	0.147803		0.436735	0.14458		0.442749	0.135585		0.439331	0.151559		0.436879	0.147898		0.439131	0.177255		0.436964	0.147896		0.440251	0.149494		0.437746	0.134701
0.444035	0.133987		0.450851	0.124962		0.445948	0.132647		0.444238	0.138081		0.438895	0.143168		0.445415	0.135622		0.44621	0.136285		0.441526	0.135295		0.447263	0.13316		0.443609	0.140036		0.447125	0.127418		0.44558	0.13675		0.445317	0.136845		0.44319	0.164226		0.44259	0.138532		0.444005	0.133009		0.444309	0.128971
0.449973	0.124304		0.455226	0.113576		0.450008	0.119281		0.452676	0.126181		0.44702	0.130968		0.44979	0.120907		0.454023	0.124417		0.449651	0.123106		0.451949	0.118091		0.451735	0.129092		0.451187	0.120273		0.449646	0.122999		0.451879	0.124483		0.450072	0.154044		0.451028	0.125078		0.449002	0.125822		0.452434	0.117088
0.458098	0.11585		0.460227	0.105965		0.456572	0.113344		0.458925	0.112407		0.451394	0.118237		0.455413	0.115544		0.459647	0.110529		0.455274	0.109296		0.456638	0.113765		0.457045	0.111527		0.458374	0.11367		0.455269	0.114603		0.455316	0.113783		0.457572	0.150462		0.45759	0.11143		0.456815	0.121742		0.458371	0.105626
0.46466	0.102454		0.467414	0.0975806		0.464384	0.105861		0.462674	0.103008		0.455145	0.109949		0.463539	0.105269		0.464023	0.100729		0.458715	0.101069		0.463512	0.106528		0.461111	0.102186		0.465561	0.102963		0.463707	0.105413		0.460317	0.106689		0.462882	0.137394		0.461027	0.100888		0.463376	0.105579		0.462434	0.0984371
0.468723	0.093244		0.475227	0.0870318		0.470634	0.0917539		0.467675	0.0984578		0.462019	0.104815		0.470104	0.0941363		0.470273	0.0935378		0.464651	0.0937943		0.471324	0.0981		0.467985	0.0958313		0.470875	0.0893919		0.469956	0.0926051		0.468129	0.0948006		0.467253	0.126172		0.466028	0.0977358		0.467755	0.0963121		0.468372	0.0926073
0.474036	0.0876205		0.480228	0.0767396		0.474697	0.0822734		0.475488	0.0942598		0.469519	0.0926343		0.473853	0.0832068		0.478398	0.08485		0.472463	0.0843136		0.476949	0.0842241		0.476111	0.0843774		0.475247	0.08169		0.473709	0.0873514		0.47469	0.0827489		0.473815	0.121284		0.47384	0.089666		0.472752	0.0934212		0.476497	0.0860106
0.48216	0.0783665		0.484603	0.0699883		0.480635	0.0737395		0.482049	0.0822077		0.474831	0.0826606		0.478851	0.0805191		0.484336	0.0740604		0.478712	0.0748823		0.481012	0.0748167		0.481734	0.0754824		0.481812	0.0740677		0.478707	0.0827626		0.479379	0.0761012		0.481627	0.110515		0.480402	0.0792431		0.480565	0.0854172		0.483059	0.0743146
0.489035	0.0685664		0.491477	0.0652466		0.48876	0.0682852		0.486737	0.0698254		0.479207	0.0747208		0.486663	0.0735984		0.488399	0.0654574		0.482774	0.0701567		0.487575	0.0733456		0.485174	0.0681935		0.489624	0.0656431		0.486519	0.0735196		0.48438	0.0698974		0.48757	0.103495		0.48509	0.0708391		0.488065	0.073856		0.487122	0.0647866
0.493411	0.060712		0.499603	0.0588366		0.495008	0.0607235		0.491739	0.0640341		0.485457	0.0682508		0.493228	0.0587905		0.494647	0.0619225		0.488401	0.065956		0.4957	0.0663512		0.49111	0.0650029		0.49556	0.0582358		0.49308	0.0625937		0.491567	0.0663671		0.491629	0.0919592		0.489778	0.0654743		0.492749	0.0676046		0.492747	0.0578793
0.498411	0.0555891		0.505226	0.0504661		0.49876	0.0507389		0.499238	0.060385		0.493582	0.0611459		0.497604	0.0542347		0.502773	0.0562293		0.496213	0.0566844		0.501325	0.0563727		0.498923	0.0577323		0.499935	0.052432		0.49746	0.0558142		0.499066	0.0568429		0.497878	0.088162		0.497278	0.0601114		0.497441	0.0609596		0.500872	0.0542775
0.506223	0.0507269		0.509288	0.0446207		0.504072	0.0467825		0.506738	0.0539411		0.499833	0.0528486		0.502601	0.0496111		0.50871	0.048049		0.5034	0.0490858		0.505388	0.0487388		0.504858	0.0513628		0.505875	0.0476025		0.502457	0.0515935		0.504067	0.0479554		0.506003	0.0799734		0.504777	0.0523		0.504315	0.0549074		0.507434	0.0466267
0.513723	0.043273		0.516166	0.0428438		0.511572	0.0452644		0.511739	0.0455953		0.503895	0.0458369		0.510101	0.0478214		0.51246	0.040074		0.507776	0.044943		0.511638	0.046395		0.508925	0.0431729		0.514	0.0452799		0.509644	0.049368		0.508443	0.0430633		0.512259	0.0691061		0.510091	0.0438181		0.512128	0.0471663		0.510871	0.0417654
0.517786	0.0349321		0.524292	0.036875		0.518135	0.0371051		0.516114	0.0405868		0.50952	0.0444444		0.5176	0.0396904		0.517772	0.0401931		0.512777	0.0410231		0.520074	0.0404024		0.514548	0.0422189		0.520248	0.0388594		0.517456	0.0400471		0.515317	0.0382012		0.516318	0.0659827		0.514467	0.0394483		0.517438	0.0420941		0.516184	0.0390102
0.52216	0.0324237		0.529602	0.0309951		0.522509	0.0327203		0.522988	0.0400766		0.517333	0.0383062		0.522602	0.0339301		0.525274	0.0366313		0.520277	0.0376131		0.525699	0.033483		0.52236	0.0375224		0.524311	0.032924		0.522461	0.0330506		0.523442	0.034175		0.521941	0.0653327		0.521028	0.037358		0.521504	0.0381681		0.523684	0.0359706
0.529348	0.0322203		0.533039	0.0276294		0.527822	0.0286489		0.531114	0.0358618		0.524207	0.0319124		0.526977	0.0309657		0.531835	0.031933		0.527776	0.0313397		0.529451	0.0313535		0.529547	0.030129		0.530247	0.03014		0.526833	0.0327537		0.528752	0.0300183		0.530379	0.0632011		0.529153	0.0335368		0.528691	0.0355824		0.530246	0.0299372
0.536223	0.0274402		0.538978	0.0252869		0.535322	0.0278232		0.536424	0.0284554		0.528269	0.0295179		0.533851	0.0274279		0.53621	0.0299074		0.532465	0.0268755		0.535075	0.0278986		0.533926	0.0284882		0.538372	0.0258886		0.533707	0.0317327		0.532815	0.0282821		0.53694	0.0546355		0.534776	0.0281137		0.536816	0.0304631		0.534934	0.0278854
0.541223	0.0238622		0.546791	0.0230217		0.542822	0.0248901		0.540799	0.0245973		0.533894	0.0272596		0.541976	0.023771		0.541522	0.0254118		0.537153	0.0246187		0.542575	0.025164		0.538923	0.0258441		0.544624	0.0216447		0.541832	0.0287938		0.539693	0.0267655		0.540381	0.048791		0.538839	0.0266363		0.541814	0.0263766		0.539935	0.022458
0.54591	0.0214249		0.552726	0.0198035		0.54751	0.0200941		0.547677	0.0233504		0.542019	0.0237384		0.54729	0.0207648		0.549022	0.0240845		0.544653	0.0219524		0.549136	0.0201136		0.546423	0.0236841		0.548374	0.0194339		0.547142	0.0235022		0.547818	0.0228776		0.545378	0.0414642		0.545404	0.0231453		0.545255	0.0248015		0.547121	0.0204861
0.552785	0.0191555		0.556789	0.0175709		0.552197	0.0177452		0.55549	0.0215766		0.548895	0.0208016		0.551353	0.0189576		0.556524	0.0215574		0.552465	0.0187697		0.553512	0.0180145		0.553923	0.0210297		0.553371	0.0176133		0.551209	0.0196004		0.553441	0.0194233		0.552878	0.0444862		0.553529	0.0206121		0.551503	0.0252288		0.554934	0.0174878
0.560598	0.0176401		0.562728	0.0152536		0.559072	0.0165416		0.560487	0.0177481		0.552645	0.0178517		0.558227	0.0172441		0.56121	0.0188846		0.556528	0.0171211		0.558824	0.0178989		0.558607	0.0175604		0.561184	0.016566		0.558083	0.0178117		0.556878	0.0161504		0.559752	0.0380824		0.559152	0.0181657		0.559316	0.0223987		0.559934	0.0169513
0.566223	0.0140696		0.570541	0.013467		0.566885	0.0128497		0.564237	0.0163214		0.557332	0.0151023		0.566352	0.0150523		0.565898	0.0168358		0.56059	0.0152321		0.566325	0.0156595		0.563299	0.0157806		0.567749	0.0147479		0.566208	0.0169299		0.562818	0.0158954		0.564131	0.0322862		0.562589	0.0148629		0.564938	0.0181058		0.564309	0.0140764
0.570598	0.0129669		0.577415	0.0124437		0.572197	0.0118624		0.570489	0.0150159		0.564831	0.0136379		0.571666	0.014824		0.573085	0.015279		0.567464	0.0145462		0.573512	0.0136278		0.570799	0.0147587		0.572437	0.0131583		0.571205	0.0149231		0.57063	0.0147178		0.569129	0.0324677		0.568529	0.0142997		0.569318	0.0176126		0.571496	0.0116987
0.576848	0.0126336		0.58179	0.0101132		0.57626	0.0113529		0.577989	0.0123956		0.571707	0.013532		0.575103	0.0128077		0.580898	0.0136542		0.574964	0.0124595		0.578201	0.012468		0.578612	0.0126111		0.577435	0.0115216		0.574959	0.0129618		0.576566	0.0115103		0.576628	0.0283304		0.576028	0.0121912		0.575253	0.0168592		0.579309	0.0108105
0.584973	0.0116986		0.587101	0.00844206		0.583447	0.00977083		0.583924	0.0105695		0.576083	0.0116967		0.581352	0.0108502		0.585899	0.0120217		0.580274	0.011546		0.582887	0.0111634		0.58267	0.00995754		0.584621	0.0104838		0.581208	0.0122626		0.580628	0.0112461		0.584128	0.0258857		0.581964	0.0102341		0.583066	0.0147205		0.584622	0.00802137
0.59091	0.0103742		0.594913	0.00890883		0.591572	0.00807261		0.5883	0.0104546		0.580769	0.0106826		0.588851	0.0106211		0.589961	0.0110817		0.58465	0.0108404		0.590387	0.0103152		0.586737	0.00893396		0.592125	0.00861209		0.588707	0.0116133		0.586568	0.0106389		0.589133	0.024624		0.586339	0.00991037		0.589627	0.0111934		0.588684	0.00814839
0.594973	0.00764919		0.602104	0.00879421		0.596571	0.00723245		0.594239	0.00977186		0.587958	0.0100269		0.594791	0.00916851		0.597148	0.0104319		0.591215	0.00929438		0.597886	0.00862245		0.593611	0.00960402		0.597122	0.00768437		0.594643	0.0100983		0.59438	0.00921579		0.593505	0.0231114		0.592279	0.00845111		0.593999	0.0118178		0.595871	0.00888052
0.601223	0.007414		0.606475	0.00751168		0.600323	0.00741975		0.602052	0.00922209		0.59577	0.00803913		0.599166	0.00801313		0.605273	0.0102994		0.59934	0.00849459		0.602575	0.00753114		0.601111	0.0084764		0.601498	0.00793955		0.599022	0.00757017		0.600942	0.00747871		0.600379	0.0208719		0.600091	0.00910257		0.599316	0.0113799		0.603997	0.00759958
0.609661	0.00680062		0.611164	0.00646727		0.606571	0.00716713		0.608613	0.00858808		0.601082	0.00660059		0.604789	0.00768826		0.60996	0.00789776		0.604963	0.00692924		0.60695	0.00734179		0.606108	0.0069488		0.608372	0.00720606		0.604645	0.00775402		0.605317	0.00614086		0.608504	0.0180731		0.606966	0.00813165		0.607129	0.0105485		0.608997	0.0058957
0.615598	0.00645502		0.618976	0.00607054		0.614384	0.00653875		0.612989	0.00759268		0.605458	0.00696505		0.612602	0.00714534		0.61371	0.00732828		0.609338	0.0064055		0.61445	0.00662939		0.610487	0.00635756		0.616184	0.00676423		0.612458	0.00741904		0.610631	0.00643987		0.613822	0.0158107		0.611341	0.00723561		0.614003	0.0096413		0.612747	0.00479282
0.619348	0.0051564		0.626476	0.00570261		0.620008	0.00650503		0.618303	0.00678566		0.612019	0.00711211		0.619789	0.00549578		0.620273	0.00760256		0.615278	0.00577234		0.622262	0.00488136		0.617361	0.00578986		0.621498	0.00637682		0.619332	0.00528031		0.618443	0.00554919		0.617568	0.015711		0.616029	0.0068347		0.618375	0.00737959		0.618997	0.00503839
0.624661	0.00561311		0.630851	0.00487975		0.624384	0.00438614		0.626115	0.00596079		0.620144	0.00633062		0.624164	0.00510947		0.627773	0.00755065		0.62309	0.00560983		0.626951	0.00458568		0.625174	0.00598659		0.625874	0.006148		0.623711	0.0059211		0.62563	0.00550246		0.624442	0.0162089		0.623842	0.00521458		0.62338	0.00758086		0.626809	0.00584124
0.632473	0.00546583		0.634914	0.00435597		0.630322	0.0043372		0.633302	0.00528114		0.625769	0.00611379		0.629165	0.00647998		0.633397	0.00481742		0.629652	0.00505099		0.6307	0.00396658		0.631109	0.00525053		0.632748	0.00537676		0.629021	0.00546813		0.630315	0.00506881		0.63288	0.0126783		0.631341	0.00486241		0.631505	0.0071342		0.632434	0.00581789
0.639036	0.00442287		0.642101	0.00395194		0.638447	0.00430637		0.637677	0.0048212		0.629832	0.00582663		0.636978	0.0052313		0.637773	0.0050855		0.633714	0.004781		0.637262	0.00377891		0.635176	0.00529572		0.640873	0.0049149		0.636833	0.00531721		0.635003	0.00396192		0.637877	0.0126399		0.636026	0.0049484		0.638692	0.00650651		0.637122	0.00384579
0.64341	0.0034004		0.649292	0.00421669		0.644697	0.003171		0.642675	0.00481104		0.636708	0.00513151		0.644165	0.00486998		0.64371	0.0050855		0.639337	0.00464535		0.644761	0.00426751		0.641112	0.00437513		0.645874	0.00370964		0.64402	0.004661		0.642503	0.0042099		0.641318	0.0122474		0.640714	0.00438127		0.642751	0.0055186		0.643059	0.00316905
0.648723	0.00375419		0.654289	0.00460277		0.649073	0.00296886		0.650487	0.00495667		0.644831	0.00516069		0.648853	0.00461445		0.651836	0.00393467		0.647775	0.00368326		0.650075	0.00397183		0.649237	0.0042156		0.649311	0.00372039		0.648087	0.00348345		0.650002	0.00380678		0.647566	0.0109449		0.648214	0.00475936		0.646817	0.00406861		0.650872	0.00403575
0.656223	0.00349068		0.658664	0.0037156		0.654385	0.00390151		0.657987	0.00346523		0.650145	0.00385569		0.653541	0.00391723		0.658086	0.00506484		0.65434	0.00294717		0.654451	0.00366144		0.655485	0.00304069		0.65556	0.00368243		0.653084	0.00312325		0.654378	0.00408468		0.655066	0.00975199		0.656026	0.00375326		0.654004	0.00446752		0.657747	0.00339013
0.663723	0.0032043		0.665538	0.00353055		0.662197	0.00317331		0.662049	0.00269202		0.653895	0.00349779		0.661666	0.00272394		0.66246	0.00470482		0.657777	0.00308932		0.660699	0.00357633		0.659857	0.00255601		0.663372	0.00389586		0.660897	0.00315827		0.658441	0.00406542		0.661009	0.0103595		0.660402	0.00285825		0.661504	0.00391781		0.661809	0.00323816
0.668411	0.00324014		0.673351	0.00295863		0.669384	0.00233933		0.666112	0.00400028		0.65952	0.00381453		0.669166	0.00240469		0.667773	0.00411572		0.662775	0.0036475		0.668512	0.00313459		0.665487	0.00257871		0.669312	0.00347259		0.668396	0.00319996		0.665627	0.00321327		0.665381	0.0132384		0.664464	0.00287738		0.666188	0.00448777		0.667121	0.00383526
0.673098	0.00319679		0.67929	0.00295606		0.673759	0.00222718		0.673299	0.00376398		0.667332	0.0037867		0.673229	0.00248986		0.675899	0.0031888		0.670587	0.00317837		0.674762	0.00233981		0.673926	0.0032185		0.673374	0.00289326		0.672455	0.00377028		0.672818	0.00256689		0.671004	0.0122196		0.671339	0.00338773		0.67088	0.00426565		0.674934	0.00201787
0.680286	0.00267386		0.683353	0.00229359		0.678759	0.00195702		0.680803	0.003987		0.67327	0.00383791		0.677291	0.00205962		0.682773	0.00326112		0.677152	0.00155473		0.679137	0.00284123		0.680487	0.0027168		0.67931	0.00228989		0.676522	0.00338214		0.677815	0.00282716		0.678816	0.0111461		0.678842	0.0029971		0.677754	0.00368602		0.682122	0.00208241
0.688098	0.00306503		0.689601	0.00208388		0.686571	0.00213854		0.6858	0.00308848		0.677645	0.00295109		0.684478	0.00264126		0.686835	0.00399072		0.681837	0.00193589		0.684762	0.00205337		0.68392	0.00215078		0.687122	0.00211801		0.683708	0.00239804		0.682191	0.00307596		0.685691	0.00688044		0.683839	0.00167257		0.685567	0.00322062		0.686496	0.00179702
0.693098	0.00340569		0.697727	0.00212452		0.69376	0.00149301		0.690175	0.00225158		0.68327	0.00237637		0.691665	0.00198527		0.692147	0.00315394		0.686838	0.00171118		0.692575	0.00221519		0.688925	0.00247068		0.693996	0.00204821		0.690895	0.00239366		0.689065	0.0026544		0.69007	0.00659835		0.688215	0.00172338		0.69119	0.00353189		0.691496	0.00219204
0.697473	0.00277063		0.703979	0.00123459		0.697823	0.0013612		0.697049	0.00202773		0.691082	0.00246913		0.696979	0.00207024		0.700273	0.00390678		0.694025	0.00184748		0.699449	0.00182095		0.696425	0.00261192		0.698059	0.00165974		0.695893	0.00272635		0.696877	0.00245581		0.69538	0.00796708		0.694776	0.0022072		0.695248	0.00358145		0.699309	0.00249688
0.704661	0.00235608		0.708038	0.00176488		0.702196	0.00145216		0.704862	0.00294907		0.698269	0.00170967		0.701351	0.00202629		0.70746	0.00335642		0.701524	0.00185268		0.703511	0.00158327		0.702986	0.00207112		0.703373	0.00127106		0.700272	0.00242681		0.702504	0.00156514		0.703192	0.00709057		0.702589	0.00213376		0.701505	0.00241433		0.706809	0.00206639
0.712473	0.002033		0.713977	0.00196196		0.709385	0.000885052		0.710801	0.00252377		0.702645	0.00192475		0.708229	0.00213729		0.711209	0.00318648		0.706525	0.00169471		0.709138	0.00148261		0.70767	0.0011457		0.711186	0.00233102		0.707146	0.00225921		0.70688	0.00126408		0.710379	0.00785343		0.708528	0.00172256		0.70963	0.00301995		0.710872	0.00213276
0.717473	0.00213813		0.722103	0.0016181		0.716572	0.000877344		0.714864	0.00201736		0.707331	0.00199451		0.716041	0.00232493		0.715585	0.00200466		0.710901	0.00199873		0.717262	0.00161038		0.712675	0.00128568		0.718372	0.00212793		0.715271	0.00238845		0.712815	0.00146451		0.714759	0.00538988		0.712591	0.00156334		0.715566	0.00234301		0.714934	0.00312236
0.720911	0.00175823		0.728351	0.000896643		0.721571	0.000857496		0.721112	0.00170243		0.715144	0.00196669		0.721977	0.00226349		0.723085	0.00257826		0.718088	0.00172245		0.724138	0.00220279		0.720175	0.00127265		0.722748	0.00277453		0.720894	0.00134431		0.720941	0.0018248		0.719443	0.00568914		0.718839	0.00134653		0.719624	0.00249774		0.722122	0.00242273
0.727473	0.00141535		0.732101	0.000887963		0.726259	0.00120762		0.729238	0.00182483		0.722645	0.00280596		0.726352	0.00205857		0.729961	0.00275363		0.7259	0.00198443		0.727887	0.00195797		0.727675	0.00161608		0.727436	0.00191345		0.724961	0.00131638		0.727193	0.00125322		0.727256	0.005349		0.726964	0.00114721		0.725881	0.002068		0.729621	0.00293034
0.735285	0.00150291		0.737102	0.00114088		0.733135	0.000858267		0.735177	0.00164683		0.727332	0.00204205		0.732292	0.00168955		0.734647	0.002445		0.731214	0.00194997		0.732576	0.00144877		0.732672	0.00189646		0.735561	0.00121749		0.731209	0.00183001		0.731256	0.00101753		0.734755	0.00392549		0.733217	0.00119925		0.734311	0.00215866		0.73431	0.00188674
0.740598	0.00174048		0.744602	0.00175639		0.740948	0.00070835		0.73924	0.00148397		0.73202	0.00166715		0.740413	0.00108354		0.739335	0.00196411		0.735277	0.00142667		0.740075	0.00153367		0.737051	0.00188743		0.743061	0.00121159		0.739334	0.00117463		0.737191	0.00180123		0.738822	0.00547001		0.737279	0.00110278		0.740254	0.00118979		0.738684	0.00138187
0.744973	0.00163261		0.751163	0.00157273		0.746572	0.00077483		0.745176	0.0016572		0.73952	0.001597		0.746665	0.000783028		0.746211	0.00252893		0.742151	0.00144054		0.746949	0.000552694		0.743925	0.0012262		0.747124	0.00100069		0.745583	0.00148231		0.745317	0.00149033		0.742881	0.00598104		0.743215	0.00108303		0.743688	0.00151557		0.745559	0.00151484
0.751223	0.00146689		0.755851	0.000939848		0.750635	0.000624913		0.753614	0.00163148		0.747332	0.00149748		0.750728	0.00135114		0.754024	0.00308989		0.750589	0.00148236		0.751638	0.000415886		0.752051	0.000571062		0.751186	0.00181412		0.749649	0.00146709		0.751565	0.00149607		0.750067	0.00776104		0.75134	0.00142244		0.749005	0.00173678		0.753684	0.000915675
0.759036	0.00143088		0.760852	0.00128687		0.757196	0.0010024		0.759862	0.00147484		0.751708	0.00144434		0.756664	0.00121932		0.759649	0.00271153		0.755903	0.00199851		0.756324	0.000790584		0.757361	0.000587246		0.758373	0.00164118		0.755585	0.0014896		0.755315	0.00144012		0.757567	0.00551989		0.757902	0.00115688		0.756818	0.00124449		0.759309	0.000879057
0.765598	0.00131227		0.768352	0.00170234		0.765009	0.000857111		0.763299	0.00180616		0.755457	0.00126017		0.764789	0.00157647		0.763711	0.00200698		0.75934	0.00144726		0.763513	0.00131827		0.761419	0.00102652		0.76556	0.00125609		0.76371	0.0017533		0.760629	0.00108188		0.762572	0.00590173		0.761339	0.00125849		0.763379	0.0018353		0.763684	0.00182426
0.769973	0.001443		0.775852	0.00194164		0.770947	0.00101127		0.768613	0.000909927		0.762331	0.000997354		0.771041	0.00104126		0.770272	0.00239412		0.765588	0.00139265		0.771013	0.000974885		0.768301	0.000483206		0.770561	0.0013202		0.769959	0.00111064		0.768128	0.00097552		0.766944	0.00478728		0.76634	0.00121488		0.767751	0.00193352		0.769934	0.00164849
0.775285	0.00126431		0.780853	0.00147744		0.775009	0.00121842		0.776113	0.000588154		0.769831	0.00097571		0.774791	0.000673071		0.778398	0.00205347		0.773401	0.00140739		0.776637	0.0013996		0.776732	0.00103556		0.774937	0.000995844		0.773705	0.00078128		0.774693	0.00132494		0.773818	0.00295168		0.774152	0.00101597		0.773068	0.00141433		0.777747	0.00165856
0.783098	0.00110388		0.785541	0.000975359		0.78126	0.00106927		0.782674	0.000477577		0.775145	0.00164667		0.779788	0.00111769		0.784335	0.00187785		0.77934	0.00102038		0.781013	0.000775033		0.781737	0.00103808		0.781811	0.00107198		0.77871	0.000827557		0.779378	0.000568097		0.78163	0.00529994		0.780714	0.00107007		0.780568	0.00103566		0.783684	0.00148669
0.789973	0.000923657		0.792415	0.000725206		0.789698	0.00127931		0.787362	0.000608278		0.779519	0.00158077		0.787601	0.0010321		0.788398	0.00253178		0.783399	0.000791343		0.787574	0.000816432		0.785483	0.00104754		0.789936	0.000980027		0.786522	0.00195695		0.784379	0.000587156		0.787253	0.00585921		0.785402	0.000585637		0.787755	0.00170989		0.787747	0.00177162
0.794348	0.00106412		0.800228	0.00057034		0.795635	0.0011159		0.792363	0.000886898		0.786082	0.00147777		0.794166	0.000674113		0.794648	0.00199665		0.789339	0.00161692		0.795387	0.000611536		0.791739	0.000935726		0.795872	0.00106249		0.793083	0.00150294		0.791879	0.000670158		0.791632	0.0033049		0.790403	0.000878558		0.792439	0.00149502		0.793996	0.001551
0.79966	0.0011643		0.805542	0.000806683		0.799072	0.000722995		0.799863	0.00180844		0.793894	0.00137052		0.79885	0.000613719		0.803085	0.00150517		0.797151	0.00112331		0.801011	0.000879477		0.799238	0.00126508		0.799934	0.000913385		0.797142	0.00131346		0.799378	0.00036459		0.797881	0.00153962		0.79759	0.000773033		0.797124	0.00229768		0.802434	0.0010919
0.807473	0.00143464		0.8096	0.00129712		0.804697	0.00106291		0.807363	0.00127236		0.799832	0.00150096		0.803852	0.000968165		0.808711	0.00159608		0.804025	0.00137792		0.805074	0.00102721		0.805174	0.00160536		0.806187	0.00089103		0.80246	0.00101704		0.804067	0.000643515		0.806006	0.00279061		0.805089	0.000720578		0.804623	0.00210276		0.808372	0.00100676
0.814661	0.00133821		0.816791	0.000936889		0.81251	0.000751899		0.812051	0.00147775		0.804207	0.0014768		0.811038	0.000590811		0.812461	0.0015607		0.808401	0.00124509		0.81195	0.0012216		0.809546	0.00126298		0.813999	0.000976864		0.80996	0.000946166		0.808755	0.000743936		0.811942	0.00437274		0.810091	0.000530303		0.812131	0.00206921		0.811809	0.000694366
0.81841	0.000799411		0.824916	0.000884017		0.819073	0.000915113		0.816739	0.00117195		0.810145	0.00125592		0.818538	0.000836341		0.818086	0.00169319		0.813715	0.00103967		0.820075	0.00125312		0.815176	0.000624028		0.819935	0.000393318		0.817459	0.000832768		0.815629	0.000930843		0.816008	0.00303753		0.814466	0.000505618		0.817128	0.00170082		0.817122	0.000746547
0.823098	0.000665095		0.829914	0.00129278		0.823446	0.00116889		0.824239	0.00161073		0.817957	0.00128008		0.823539	0.000551452		0.825586	0.00245171		0.821527	0.000913772		0.825387	0.000816432		0.822989	0.00108958		0.823998	0.000396693		0.822457	0.0017239		0.823442	0.000742092		0.822257	0.00334824		0.821653	0.000232445		0.8215	0.00138592		0.824934	0.000942681
0.830598	0.000895668		0.833663	0.000986209		0.82876	0.00113421		0.832051	0.00179247		0.824519	0.00202601		0.828227	0.000894027		0.831836	0.00279469		0.828714	0.000793943		0.829137	0.000678994		0.829863	0.00143911		0.83025	0.000258346		0.826836	0.00150961		0.828755	0.000710941		0.830382	0.00533674		0.829465	0.000230182		0.828999	0.000329406		0.831497	0.00129696
0.837473	0.000637788		0.839916	0.00126063		0.83626	0.00109914		0.837053	0.000809515		0.828894	0.00192765		0.835102	0.000953795		0.836209	0.00249381		0.833089	0.000681699		0.834762	0.000992748		0.833922	0.00111312		0.838375	0.000389733		0.834023	0.000398353		0.833131	0.000401685		0.836318	0.00469162		0.834779	0.000864159		0.836812	0.0012185		0.835872	0.00101569
0.842473	0.000518491		0.847415	0.00136538		0.843447	0.000921664		0.841111	0.000989177		0.834519	0.00215994		0.842914	0.00115059		0.841523	0.00255631		0.838087	0.000923089		0.842574	0.000626246		0.839232	0.00118836		0.844624	0.0007685		0.841835	0.000725415		0.840005	0.000585517		0.840071	0.00612985		0.839151	0.00122537		0.841504	0.00107223		0.841184	0.00119031
0.847161	0.000743773		0.853038	0.0011099		0.848135	0.000570187		0.848302	0.0010705		0.842644	0.00112934		0.848228	0.00103939		0.849336	0.00319371		0.845899	0.000511383		0.848512	0.000550803		0.847044	0.000890327		0.848373	0.00119851		0.846833	0.000786075		0.84813	0.000292041		0.845069	0.00464992		0.846029	0.000822813		0.84525	0.00104261		0.848684	0.00146746
0.854036	0.000834227		0.857414	0.00120697		0.853134	0.000511415		0.856427	0.00126137		0.849207	0.00114345		0.852291	0.000456697		0.856523	0.0019796		0.853403	0.00105939		0.852887	0.000361878		0.854239	0.000811509		0.853375	0.00106228		0.851212	0.00113899		0.853127	0.000691267		0.852881	0.00208498		0.854154	0.000895426		0.851811	0.000385314		0.856184	0.00112394
0.86216	0.00126312		0.863353	0.00146876		0.860321	0.000938236		0.861112	0.00189537		0.852644	0.00104219		0.859477	0.0012491		0.861211	0.00125052		0.857465	0.00109059		0.858512	0.000776924		0.85861	0.000716928		0.861187	0.000919922		0.858399	0.0011294		0.856877	0.00104151		0.859442	0.00173912		0.859151	0.00062143		0.859624	0.000780902		0.861184	0.00190871
0.867473	0.00139334		0.871479	0.00168853		0.868134	0.00150303		0.864862	0.00202068		0.857644	0.00135892		0.867603	0.000442744		0.865897	0.00214334		0.861524	0.000767291		0.866325	0.00121151		0.863608	0.000973349		0.867748	0.000855178		0.866211	0.000877377		0.86313	0.000863417		0.863822	0.0047325		0.862901	0.00133769		0.864941	0.00133062		0.865559	0.0017929
0.871536	0.000892596		0.87804	0.000824044		0.873135	0.00109914		0.871427	0.00169289		0.865456	0.00199529		0.872604	0.000663908		0.873086	0.00155037		0.868715	0.000622543		0.873201	0.00123232		0.87142	0.00105448		0.872124	0.00110087		0.871208	0.000851738		0.870629	0.000394307		0.868819	0.0084176		0.869153	0.00141236		0.869313	0.00146812		0.872747	0.00066141
0.878098	0.00145051		0.882102	0.00147527		0.87751	0.000686961		0.878926	0.00129352		0.872019	0.00119408		0.876041	0.000760954		0.880899	0.00124639		0.876215	0.00102948		0.877887	0.00107744		0.87892	0.00131195		0.877125	0.000925405		0.874955	0.000780447		0.876565	0.000427302		0.876319	0.0065542		0.876653	0.00102111		0.875562	0.000890603		0.880559	0.00119328
0.886223	0.00134197		0.887416	0.000906507		0.884697	0.000385584		0.884549	0.000840012		0.876708	0.00134443		0.882289	0.000525004		0.885898	0.00175905		0.881212	0.000886469		0.882888	0.000493852		0.882986	0.00234667		0.884937	0.00070734		0.881523	0.000890301		0.880628	0.000264169		0.883818	0.00507346		0.882589	0.00108159		0.883374	0.00159928		0.885871	0.0016208
0.892161	0.000846003		0.895229	0.000941426		0.892822	0.000813947		0.888925	0.0011539		0.881707	0.00206563		0.890102	0.000476689		0.890273	0.00179598		0.885587	0.000603475		0.890388	0		0.887045	0.00148661		0.892437	0.000642385		0.889023	0.00138934		0.886567	0.000118456		0.888816	0.00455507		0.886652	0.000815613		0.88963	0.00101481		0.889934	0.000967398
0.896223	0.00115525		0.902416	0.000616307		0.897509	0.000692934		0.894864	0.000949137		0.888894	0.00173595		0.896041	0.000959627		0.89746	0.00217899		0.892465	0.000580506		0.897887	0.000766206		0.894232	0.000833999		0.897121	0.00145243		0.894646	0.00134389		0.894692	0.000750699		0.893508	0.00611186		0.892591	0.000357307		0.894002	0.00127138		0.897122	0.00132763
0.902473	0.00106429		0.906791	0.00114581		0.901258	0.000566911		0.90299	0.00166592		0.896395	0.00109591		0.900413	0.0010069		0.905273	0.00220249		0.900587	0.00058939		0.902574	0.000822526		0.901732	0.0010612		0.901497	0.00100702		0.899018	0.000909479		0.901254	0.000986177		0.900382	0.00506446		0.900716	0.000149752		0.899312	0.00114355		0.905246	0.00122281
0.91091	0.00116959		0.911788	0.0012338		0.907822	0.000364966		0.909238	0.00177898		0.901394	0.00119853		0.906352	0.00110957		0.909961	0.001914		0.906213	0.00189082		0.907262	0.000672059		0.906737	0.00170646		0.908688	0.00092182		0.904961	0.000912397		0.905316	0.000648639		0.908194	0.00443079		0.907278	0.000572883		0.907437	0.00039166		0.910246	0.00193869
0.916536	0.00122967		0.919601	0.00113614		0.915634	0.000464397		0.913613	0.00156156		0.90577	0.00144569		0.914165	0.0006208		0.913711	0.00231871		0.910276	0.00184748		0.914762	0.000806975		0.911108	0.00181575		0.9165	0.000938481		0.912773	0.00136953		0.91063	0.00128334		0.913504	0.00539561		0.91134	0.000812939		0.914311	0.000140526		0.913684	0.00128826
0.920286	0.0011701		0.927101	0.00113812		0.920946	0.000739181		0.919236	0.00136614		0.912957	0.00158309		0.921039	0.00085071		0.920585	0.00155992		0.916524	0.00129861		0.922261	0.000263738		0.917982	0.00121043		0.92181	0.000832401		0.919335	0.0013712		0.918443	0.00174446		0.917571	0.00268431		0.916654	0.00101268		0.918378	0.000468118		0.920246	0.0013988
0.92591	0.00116993		0.931163	0.00123873		0.925322	0.000871756		0.927049	0.00100266		0.920769	0.00149207		0.925102	0.00101794		0.928085	0.00158084		0.92465	0.0011894		0.926637	0.000417778		0.926108	0.00123502		0.925873	0.00106312		0.923706	0.00117192		0.92563	0.00113373		0.924758	0.00550272		0.924467	0.00119061		0.923688	0.000841042		0.928059	0.000975637
0.933723	0.00141382		0.935226	0.0011758		0.931572	0.000356295		0.933927	0.00119643		0.926081	0.00143622		0.930416	0.000924848		0.933398	0.00194551		0.930589	0.00119677		0.930387	0.000269202		0.931738	0.00128736		0.93306	0.00105595		0.929024	0.000738548		0.930005	3.72992e-05		0.932883	0.00500968		0.931653	0.00117271		0.931813	0.00138924		0.933684	0.00144778
0.939973	0.00116584		0.942726	0.00118093		0.939697	0.000759029		0.938302	0.00156011		0.930457	0.00144859		0.938228	0.000713889		0.937772	0.00125775		0.934652	0.00100521		0.937263	0.00105201		0.935797	0.000698222		0.940872	0.00112765		0.937149	0.00118714		0.935002	0.000911988		0.937567	0.0043662		0.936342	0.0010281		0.938687	0.000759143		0.938059	0.000402568
0.944348	0.000928948		0.949916	0.00123182		0.945948	0.00102187		0.943299	0.00152796		0.937333	0.00177653		0.945415	0.00134927		0.944022	0.00250362		0.9409	0.00110467		0.944762	0.00168666		0.942045	0.000860902		0.945873	0.000709239		0.944023	0.00120381		0.942815	0.000981463		0.941321	0.00466627		0.941026	0.00149197		0.942441	0.00117075		0.943997	0.000343521
0.949661	0.00148089		0.954601	0.000679831		0.950008	0.00056036		0.951425	0.00105411		0.945458	0.0013338		0.94979	0.00117059		0.952148	0.00222496		0.949026	0.0010245		0.950074	0.00176232		0.950171	0.000844087		0.949623	0.00067887		0.948395	0.00157027		0.950006	0.000724467		0.947882	0.00398845		0.948839	0.000585431		0.947125	0.00121789		0.952121	0.00127865
0.957473	0.00129862		0.959289	0.000929195		0.955635	0.000909332		0.958612	0.00126406		0.95077	0.000948269		0.954791	0.000903398		0.958398	0.0015341		0.955274	0.00118051		0.95445	0.00125691		0.956106	0.00125079		0.955872	0.000631629		0.953392	0.00143082		0.954068	0.00157251		0.955382	0.00364831		0.956338	0.000231005		0.954625	0.00134724		0.958684	0.00111547
0.96466	0.00117471		0.966163	0.00103967		0.963758	0.00139435		0.962362	0.00194806		0.954207	0.000908653		0.962604	0.000874868		0.962461	0.00170972		0.959028	0.00105917		0.961013	0.000620362		0.960173	0.00187734		0.963684	0.00128751		0.961518	0.0013316		0.95844	0.00142229		0.961005	0.00399008		0.960401	0.0009053		0.961499	0.00181294		0.962747	0.00150637
0.969348	0.00109808		0.973976	0.000740396		0.970634	0.000749202		0.96705	0.00144456		0.960457	0.0010188		0.970104	0.00083405		0.968085	0.00234066		0.964025	0.00146893		0.968826	0.000267941		0.966109	0.00107318		0.969311	0.000935318		0.968705	0.00150878		0.965631	0.00118087		0.965384	0.00743971		0.964777	0.00117066		0.966191	0.00155546		0.968059	0.0018167
0.974036	0.000728583		0.979602	0.00105822		0.974697	0.000416416		0.974237	0.00144456		0.967957	0.00199838		0.974166	0.000738671		0.976211	0.00306974		0.971838	0.00137423		0.975074	0.00113061		0.974547	0.0015711		0.973686	0.00122361		0.972458	0.000937412		0.97313	0.00154977		0.97132	0.00526397		0.971963	0.000564861		0.970876	0.00161409		0.975871	0.00213711
0.981535	0.00097793		0.983665	0.00121249		0.980009	0.000231813		0.981427	0.00156634		0.973895	0.00167778		0.978538	0.00084238		0.982772	0.00248167		0.978403	0.000793943		0.979137	0.000804874		0.980795	0.00144605		0.979622	0.000863614		0.97683	0.00123404		0.977818	0.00126818		0.979132	0.00676515		0.979154	0.000179579		0.978063	0.00126564		0.983059	0.00177848
0.989035	0.0011841		0.990226	0.000745131		0.988134	0.000400037		0.986425	0.00144746		0.97827	0.00123408		0.985729	0.00085675		0.986835	0.00212966		0.982774	0.000486464		0.985074	0.00068782		0.984236	0.00161041		0.987747	0.00106249		0.98433	0.00206347		0.98219	0.00116919		0.986006	0.00591154		0.984151	0.00107809		0.985875	0.00102206		0.987434	0.00151529
0.994035	0.00107897		0.998352	0.00080254		0.995008	0.000792751		0.991113	0.00116946		0.983895	0.00118886		0.993228	0.000751999		0.992459	0.000897731		0.987775	0.000857866		0.992887	0.00141494		0.989546	0.00152928		0.994	0.00105131		0.991211	0.00191693		0.989068	0.00104459		0.990065	0.00354529		0.988527	0.00100177		0.991193	0.00109852		0.992434	0.000846101
0.998411	0.00125066		1.00429	0.00115804		0.99876	0.00105655		0.997987	0.000724871		0.991707	0.00143139		0.997917	0.000825095		1.00058	0.000658577		0.995275	0.00082688		0.99945	0.00138909		0.997359	0.000836941		0.998375	0.000804563		0.996208	0.00108708		0.997193	0.00095892		0.995383	0.00332534		0.995401	0.000253632		0.995564	0.00169659		1.00056	0.00104178
1.0056	0.00104125		1.00835	0.000465584		1.00345	0.00103825		1.0058	0.00120597		0.998581	0.00178697		1.0026	0.00153399		1.00746	0.00202299		1.00277	0.00115516		1.00383	0.00134664		1.00392	0.000990163		1.00369	0.00123901		1.00089	0.00121382		1.00282	0.000963633		1.0032	0.00590254		1.00321	0.000652696		1.00213	0.00162466		1.00743	0.00178443
1.01341	0.000548358		1.0146	0.00122354		1.01095	0.00143501		1.01143	0.00205159		1.00296	0.0020237		1.00948	0.00108062		1.01121	0.00192873		1.00778	0.00103425		1.00945	0.00132626		1.0083	0.00115389		1.0115	0.00144885		1.00777	0.00131992		1.00688	0.000884116		1.01038	0.00592544		1.00884	0.00071955		1.01025	0.000907527		1.0115	0.00142855
1.0181	0.000910004		1.02273	0.000786363		1.01782	0.00124135		1.01549	0.0020298		1.00827	0.00180455		1.01729	0.000916518		1.0159	0.002531		1.01215	0.00133935		1.01758	0.00101229		1.0133	0.000862583		1.01837	0.000832401		1.01558	0.000501954		1.01313	0.000723032		1.01475	0.00708976		1.01322	0.000913117		1.01587	0.00170535		1.01587	0.000702834
1.02185	0.000947892		1.02898	0.000194519		1.02251	0.000648807		1.02205	0.00148895		1.01577	0.00101919		1.02323	0.000959835		1.0234	0.00241478		1.01934	0.000844648		1.02414	0.000723126		1.0208	0.00164383		1.02275	0.0011441		1.0209	0.000748345		1.02157	0.000628555		1.01976	0.00618708		1.01915	0.000859428		1.01994	0.00161469		1.02306	0.00102095
1.02841	0.00101957		1.03241	0.000612558		1.0272	0.000550918		1.03018	0.000812835		1.02296	0.00142463		1.02729	0.000710973		1.03027	0.00213069		1.02715	0.00106415		1.02757	0.000910159		1.0283	0.00157636		1.02806	0.00168357		1.02527	0.00180624		1.0275	0.00142168		1.02757	0.00463193		1.02728	0.000450696		1.02619	0.00157752		1.03056	0.00129696
1.03622	0.00121448		1.03773	0.000489849		1.03438	0.000865783		1.03611	0.0008647		1.02764	0.00144588		1.03354	0.000879033		1.03496	0.00169215		1.03246	0.00190122		1.03257	0.000511084		1.03299	0.00178065		1.03587	0.000791909		1.03183	0.00162134		1.03125	0.00134933		1.03476	0.00402851		1.03353	0.000622047		1.03463	0.00153279		1.03525	0.000411035
1.04154	0.00102333		1.04523	0.000640375		1.0422	0.000670389		1.03986	0.00146551		1.03233	0.00121843		1.04166	0.000460446		1.03965	0.00201344		1.03653	0.00110792		1.04007	0.000838498		1.03736	0.00191937		1.04306	0.00091001		1.03964	0.000779196		1.0375	0.000942115		1.03882	0.00511189		1.03759	0.000856548		1.04025	0.00114144		1.03993	0.00024122
1.04591	0.000995679		1.05179	0.000875337		1.04751	0.000654973		1.04611	0.00139497		1.04014	0.000676175		1.0476	0.000449825		1.04684	0.00215807		1.0434	0.00108734		1.04695	0.000870861		1.04486	0.00175396		1.04712	0.000940379		1.04559	0.000918234		1.04594	0.00102778		1.0432	0.00696793		1.04353	0.00134448		1.04369	0.00183742		1.04681	0.000499376
1.05247	0.00105883		1.05616	0.00132829		1.05157	0.000750358		1.05455	0.00117527		1.04764	0.000705742		1.05167	0.000843838		1.05465	0.0022655		1.05153	0.00112786		1.05132	0.000915833		1.05267	0.00101118		1.0515	0.000792964		1.04996	0.000663296		1.05188	0.00121202		1.05038	0.00477665		1.05197	0.00170528		1.04931	0.00105561		1.05462	0.000682923
1.06029	0.000850611		1.06148	0.00134743		1.05813	0.000733593		1.06049	0.0012178		1.05202	0.00133728		1.0576	0.000904023		1.05965	0.00264593		1.05653	0.000700118		1.05633	0.000335819		1.05767	0.000791962		1.05869	0.000872471		1.05621	0.000248059		1.05532	0.00124727		1.05757	0.00450847		1.05821	0.000872799		1.05713	0.000682081		1.06025	0.00112852
1.06654	0.000651783		1.06898	0.00110083		1.06626	0.00104017		1.06392	0.00113274		1.05608	0.00121766		1.06604	0.000720761		1.06402	0.00168027		1.06028	0.000665881		1.06351	0.000438372		1.06205	0.00125877		1.06587	0.00108294		1.06433	0.00100516		1.06094	0.00110504		1.06225	0.00426563		1.06165	0.00119781		1.06337	0.00103627		1.06431	0.000901028
1.0706	0.00136466		1.07616	0.00115725		1.0722	0.00097639		1.06955	0.000964489		1.06296	0.00106325		1.07198	0.000889445		1.07058	0.00115909		1.06653	0.0012089		1.07132	0.000583586		1.06924	0.00167598		1.07087	0.000917813		1.07027	0.00103142		1.06844	0.000573835		1.06695	0.00596795		1.06696	0.000977708		1.06775	0.00141131		1.07087	0.000777214
1.07622	0.00105098		1.08085	0.00195427		1.07626	0.000579629		1.07736	0.000716988		1.07046	0.00229791		1.07542	0.00143715		1.07871	0.00138172		1.07434	0.00121908		1.07633	0.000524534		1.07736	0.00121085		1.07556	0.000847163		1.07371	0.000942414		1.07501	0.00105811		1.07382	0.00438664		1.07446	0.000828984		1.07306	0.00211545		1.079	0.000919337
1.08435	0.000653831		1.08554	0.00149934		1.08251	0.000293476		1.0833	0.000654127		1.07577	0.0020121		1.08104	0.00102793		1.08433	0.00202635		1.07997	0.00127196		1.0807	0.00113691		1.08204	0.000428559		1.08244	0.000560347		1.07933	0.00146042		1.07938	0.00104008		1.08163	0.00326565		1.08103	0.000887404		1.08088	0.00142702		1.08493	0.00113241
1.09122	0.00123496		1.09304	0.00125057		1.09095	0.000573848		1.08767	0.00165658		1.08015	0.000864399		1.08854	0.000905481		1.0884	0.00141039		1.08434	0.00122277		1.08758	0.00112472		1.0858	0.000759174		1.09025	0.000491384		1.08683	0.0014329		1.08438	0.000877968		1.08726	0.0049132		1.0854	0.0013599		1.08806	0.00101572		1.08868	0.00128094
1.09529	0.00102521		1.10054	0.00127365		1.09657	0.000882161		1.0933	0.00100847		1.08671	0.00074845		1.0951	0.000825304		1.09527	0.00169706		1.09028	0.00123209		1.0957	0.00142376		1.09236	0.00125163		1.09556	0.00079444		1.0934	0.00103726		1.09219	0.000645565		1.09131	0.00390995		1.09071	0.000711116		1.09244	0.00144757		1.09493	0.00153681
1.1006	0.00091666		1.10554	0.00134664		1.10001	0.00115675		1.1008	0.000589191		1.09483	0.000631149		1.09948	0.00106938		1.1034	0.00156044		1.09809	0.00119157		1.10101	0.000589891		1.10017	0.0016928		1.09962	0.00106544		1.09746	0.00107916		1.09938	0.000992735		1.09788	0.00580933		1.09821	0.000304441		1.09744	0.00184044		1.10337	0.000424767
1.10872	0.000353454		1.11023	0.00125865		1.10563	0.000457267		1.1083	0.00165845		1.10046	0.0010503		1.10448	0.000642666		1.10902	0.00139902		1.10496	0.000992213		1.10508	0.000432909		1.10548	0.00146118		1.10619	0.00104245		1.10277	0.00121674		1.10407	0.000617898		1.10601	0.00386989		1.10571	0.000650022		1.10494	0.00222152		1.10931	0.00107611
1.1156	0.000672604		1.11742	0.00117264		1.11345	0.00105096		1.11299	0.00185097		1.10452	0.00113746		1.11229	0.00100586		1.11246	0.00167072		1.10903	0.00128192		1.11195	0.000754017		1.10986	0.00134348		1.11431	0.000675495		1.11058	0.00119047		1.10875	0.000267243		1.11194	0.00554687		1.1104	0.00117765		1.11244	0.00193201		1.11275	0.0014892
1.11935	0.000911881		1.12523	0.00123084		1.1197	0.00109663		1.11768	0.00148791		1.11077	0.00143757		1.11979	0.000795732		1.1184	0.00159221		1.11434	0.000985062		1.12007	0.000353052		1.11611	0.00134159		1.12025	0.000786637		1.11777	0.000956381		1.11594	0.000449641		1.116	0.00944701		1.11478	0.00155409		1.11712	0.00110789		1.11837	0.00131252
1.12404	0.00102964		1.12991	0.000913609		1.12407	0.00145081		1.12518	0.00147858		1.1189	0.00151043		1.12448	0.000306964		1.12621	0.00254211		1.12246	0.00104682		1.12539	0.00071598		1.12392	0.00113288		1.124	0.000906847		1.12246	0.00100599		1.12375	0.00052383		1.12225	0.00945601		1.12228	0.00123792		1.1215	0.00137957		1.12618	0.00118688
1.13154	0.000919903		1.13367	0.00104914		1.1297	0.00147586		1.13268	0.00218374		1.12515	0.00154676		1.12885	0.0011887		1.13215	0.00182155		1.12934	0.000988312		1.12883	0.000983081		1.13048	0.00116398		1.13025	0.000950502		1.12714	0.00142498		1.12875	0.00119522		1.13038	0.0064937		1.12978	0.000888432		1.129	0.00093261		1.13243	0.00107336
1.13872	0.00113631		1.14023	0.00098542		1.1372	0.000746311		1.13768	0.00150368		1.12921	0.00183509		1.13635	0.00142986		1.13621	0.00198864		1.13371	0.00099763		1.13507	0.00107954		1.13455	0.00130649		1.13869	0.00106438		1.13433	0.00140685		1.13313	0.00108619		1.13632	0.0067488		1.13478	0.000673267		1.13681	0.00116803		1.13681	0.000976324
1.14341	0.00112709		1.14804	0.000773737		1.14438	0.00119067		1.14205	0.00115639		1.13483	0.00143699		1.14416	0.000663492		1.14184	0.0021857		1.13902	0.00122862		1.14258	0.000880528		1.13986	0.000643785		1.14431	0.000591138		1.14214	0.00105185		1.14032	0.000622406		1.13975	0.00709057		1.13915	0.000655782		1.14119	0.000979754		1.14212	0.00088661
1.1481	0.00127797		1.15335	0.000903943		1.14907	0.000553808		1.14955	0.0017128		1.14327	0.000626704		1.14917	0.000765535		1.14965	0.00139799		1.14684	0.000972277		1.14851	0.000762844		1.14799	0.00102085		1.14806	0.00040555		1.14715	0.000689978		1.14813	0.000567892		1.14538	0.0059516		1.14634	0.000689517		1.14494	0.00166758		1.14962	0.00111799
1.15529	0.00181318		1.15773	0.0011827		1.15376	0		1.15737	0.00111718		1.14952	0.0012136		1.15354	0.00101606		1.15683	0.000587812		1.15403	0.000787226		1.15289	0.00104024		1.15486	0.000616672		1.15369	0.000806883		1.15152	0.000853822		1.15282	0.000126039		1.15288	0.00390014		1.15447	0.00127248		1.15181	0.00109066		1.15712	0.00129215
1.16279	0.0010735		1.16367	0.000598749		1.16157	0.000417765		1.16174	0.000707444		1.15327	0.00163739		1.16073	0.000918393		1.16121	0.0015155		1.15809	0.0012141		1.15851	0.000907217		1.15923	0.000794274		1.16119	0.000886601		1.15871	0.00112585		1.15657	0.000271547		1.15945	0.00351503		1.15915	0.000685814		1.15931	0.00116289		1.16181	0.00170845
1.1681	0.00103476		1.17179	0.000624592		1.16907	0.000953844		1.1658	0.0013707		1.15827	0.00212921		1.16854	0.00108416		1.1659	0.00207697		1.16246	0.00120348		1.16632	0.00120164		1.16424	0.00138068		1.16743	0.000457641		1.16683	0.00137808		1.16313	8.89446e-05		1.16382	0.00675371		1.1629	0.000915585		1.16462	0.000663344		1.1665	0.00123242
1.17247	0.00132507		1.17804	0.0012916		1.17376	0.000829363		1.17236	0.000930051		1.16608	0.00175083		1.17323	0.00119766		1.17371	0.00181122		1.16997	0.00167803		1.1732	0.000876955		1.17205	0.000711253		1.17181	0.00049033		1.17152	0.00156527		1.17063	0.000267243		1.16913	0.00607588		1.16915	0.000708853		1.169	0.000666668		1.174	0.00126103
1.17904	0.00118376		1.18241	0.000675886		1.17845	0.00107043		1.17986	0.00114021		1.17264	0.00241947		1.17698	0.0010169		1.18121	0.00180476		1.17715	0.00122667		1.17758	0.000888513		1.17955	0.000992896		1.17712	0.00129468		1.17527	0.00170452		1.17626	0.000333849		1.17663	0.0071102		1.17697	0.00132452		1.17525	0.00112965		1.1815	0.0011395
1.18716	0.000965983		1.18804	0.000318806		1.18595	0.000637631		1.18517	0.00093171		1.17702	0.00185576		1.18354	0.000388807		1.1859	0.00224794		1.18215	0.00146199		1.18289	0.00101544		1.18329	0.000837782		1.18462	0.000819326		1.18183	0.00120757		1.18063	0.000319298		1.18382	0.00412336		1.18259	0.00136752		1.18306	0.00131762		1.1865	0.00228061
1.19279	0.000683698		1.19585	0.000717315		1.19376	0.000637823		1.18955	0.00115245		1.18233	0.00111234		1.19135	0.00040151		1.19059	0.0020075		1.18684	0.00143426		1.19039	0.000684668		1.18767	0.000735003		1.19212	0.000839782		1.18933	0.000662045		1.18657	0.00127576		1.18851	0.00378894		1.18665	0.00081623		1.18931	0.00193019		1.19087	0.00207555
1.19685	0.000658609		1.20273	0.00126299		1.19813	0.000983327		1.1958	0.00138169		1.18983	0.00133979		1.19667	0.000496265		1.19808	0.00207258		1.19371	0.000802394		1.19789	0.00104991		1.19517	0.000683299		1.19681	0.0013434		1.19465	0.00113961		1.19469	0.000682454		1.19319	0.00412254		1.1929	0.000986553		1.19369	0.000838624		1.19806	0.00165536
1.20341	0.000762717		1.2071	0.00179447		1.20189	0.000979473		1.20393	0.00107942		1.19702	0.00204437		1.20104	0.00108229		1.2059	0.00247676		1.20152	0.00116751		1.20226	0.00147903		1.20236	0.000536172		1.2015	0.000932154		1.19902	0.00107666		1.20094	0.000395946		1.20069	0.00393612		1.20072	0.000543468		1.19931	0.00137444		1.20618	0.000861206
1.21185	0.00132302		1.2121	0.00158831		1.20876	0.00129145		1.21018	0.00143252		1.20202	0.00150193		1.20729	0.00103002		1.20996	0.00171746		1.20715	0.000916805		1.20695	0.000480823		1.20704	0.00176279		1.20869	0.000118734		1.20527	0.00133305		1.20532	0.000841898		1.2085	0.00297785		1.20728	0.000213931		1.20744	0.000895136		1.21087	0.00123517
1.21747	0.00168945		1.22023	0.00101284		1.21626	0.000904707		1.21424	0.00160015		1.20639	0.00116606		1.21542	0.0008353		1.21402	0.00091426		1.21121	0.000713119		1.21476	0.000119996		1.21174	0.00200765		1.2165	0.000862137		1.21339	0.00102996		1.21063	0.00104315		1.21351	0.00639967		1.21134	0.00119616		1.214	0.00148625		1.21462	0.00182746
1.22091	0.000613553		1.22742	0.000514312		1.22157	0.00056113		1.21987	0.00101345		1.21358	0.00139564		1.22166	0.000930471		1.2209	0.00235538		1.21777	0.00104032		1.22226	0.000344646		1.21861	0.00170982		1.22119	0.00110846		1.21964	0.00140268		1.21844	0.00113025		1.21757	0.00561146		1.21665	0.00125788		1.21807	0.00144999		1.22118	0.00135692
1.22685	0.00132456		1.23117	0.000506026		1.22626	2.96752e-05		1.22799	0.000252481		1.22139	0.00208592		1.22604	0.000451699		1.2284	0.00323038		1.2259	0.00139829		1.22633	6.8719e-05		1.22642	0.00190823		1.22556	0.0015467		1.22402	0.000582625		1.22532	0.00119727		1.22475	0.00609469		1.22478	0.000612584		1.22369	0.00121578		1.22868	0.0012386
1.23435	0.00121874		1.23585	0.000808064		1.23282	0.000536851		1.23486	0.00149455		1.22671	0.00162986		1.23135	0.00115684		1.2334	0.00233291		1.23184	0.00122602		1.23039	0.000866027		1.23205	0.0014967		1.23306	0.00119324		1.22933	0.00156798		1.22969	0.00124276		1.23288	0.00457224		1.23165	0.000835155		1.23182	0.00202116		1.234	0.000930551
1.24029	0.000930143		1.24304	0.000887174		1.24063	0.000419692		1.23893	0.000980671		1.23077	0.000890294		1.23917	0.00124681		1.23809	0.00204753		1.23559	0.000498815		1.23757	0.000756749		1.23611	0.00135273		1.24087	0.00081321		1.23746	0.00179332		1.23501	0.0012358		1.23757	0.00650596		1.23603	0.000566712		1.23838	0.000904505		1.23837	0.00144778
1.24466	0.000588464		1.25023	0.00140306		1.24688	0.00078196		1.24424	0.00122755		1.23796	0.00155024		1.24604	0.00135281		1.24465	0.00201783		1.24184	0.000331749		1.24507	0.000650204		1.24267	0.00128189		1.24556	0.000922875		1.24433	0.00126572		1.24282	0.00132884		1.24132	0.00673654		1.24103	0.000639737		1.24212	0.000718346		1.24493	0.00123013
1.25029	0.000726706		1.25491	0.000803132		1.25095	0.00118007		1.25236	0.000415338		1.24608	0.00170097		1.25042	0.00151212		1.25246	0.00207516		1.25028	0.000782025		1.25008	0.00104255		1.2508	0.000891798		1.24931	0.00121391		1.2484	0.000841106		1.25	0.000679175		1.24788	0.00688616		1.24915	0.000809031		1.24713	0.00144002		1.25275	0.000901028
1.2581	0.000792072		1.2596	0.000957603		1.25688	0.000859231		1.25924	0.000281525		1.25108	0.00137728		1.25573	0.00146464		1.2584	0.00137655		1.25621	0.00148648		1.25445	0.000456656		1.25642	0.00102547		1.25587	0.000361262		1.25371	0.00119277		1.25407	0.000584492		1.25569	0.00501132		1.25634	0.000881644		1.25463	0.00111363		1.259	0.00142398
1.26529	0.00101394		1.26648	0.00100752		1.26501	0.000671738		1.26299	0.000494796		1.25483	0.00107717		1.26354	0.000926098		1.26277	0.00217692		1.25965	0.00153501		1.26133	0.000189345		1.26079	0.00121884		1.26337	0.000953876		1.26183	0.00176518		1.25844	0.000562768		1.26101	0.00367693		1.26009	0.000896043		1.2615	0.000387731		1.26306	0.00124066
1.26966	0.000826888		1.27429	0.00130344		1.27126	0.000468636		1.26767	0.00110204		1.26108	0.00156222		1.27073	0.000748459		1.26871	0.0015359		1.26528	0.000413223		1.26914	0.000824628		1.26705	0.00136975		1.269	0.0015931		1.26902	0.00156256		1.26563	0.000845587		1.26538	0.00294923		1.26478	0.000717904		1.26587	0.00063675		1.269	0.000865555
1.27466	0.00169576		1.27991	0.00132356		1.27563	0.000352441		1.27517	0.00109166		1.26889	0.00132742		1.27479	0.00102481		1.27652	0.00125517		1.27278	0.000126329		1.27476	0.000945674		1.27549	0.0016308		1.27337	0.000891873		1.27277	0.00088509		1.27282	0.000971831		1.27132	0.0040326		1.27197	0.000429097		1.27088	0.00108069		1.27681	0.0010507
1.28216	0.000871945		1.28398	0.000967467		1.28126	0.000724344		1.28205	0.00140763		1.27452	0.00166541		1.27917	0.000836758		1.28309	0.00228771		1.27934	0.00113523		1.27914	0.00117579		1.28142	0.00162197		1.27963	0.000920555		1.27746	0.000664547		1.27782	0.00132371		1.27944	0.00423047		1.27915	0.000723253		1.27807	0.00125567		1.28368	0.000489306
1.28966	0.000951988		1.29054	0.000836867		1.28938	0.000779647		1.28674	0.00151654		1.27889	0.00145071		1.28667	0.000597684		1.28746	0.00232568		1.28371	0.00097206		1.28508	0.00108017		1.28486	0.000983858		1.28744	0.000667482		1.28496	0.000890301		1.28251	0.00143336		1.2857	0.00507673		1.28415	0.00123874		1.28588	0.000913571		1.28775	0.000320864
1.29435	0.000844126		1.29866	0.000498332		1.29595	0.0006991		1.29142	0.00108689		1.28483	0.0012022		1.29354	0.000705559		1.29309	0.00276473		1.28903	0.000913988		1.2932	0.00102154		1.29049	0.000944134		1.29369	0.000971591		1.29183	0.000935535		1.28938	0.000547193		1.29007	0.00521246		1.28884	0.000862102		1.29088	0.00111182		1.29337	0.000339173
1.29904	0.000702642		1.3046	0.000789322		1.2997	0.000217361		1.29861	0.00138564		1.29264	0.00148183		1.29854	0.000844671		1.30121	0.0018404		1.29653	0.00125592		1.29945	0.00141536		1.29799	0.000992475		1.29806	0.000604213		1.29621	0.00110438		1.29719	0.00126346		1.29538	0.00831295		1.29572	0.000582963		1.29525	0.000733456		1.3015	0.00107153
1.30654	0.000603825		1.30835	0.00092446		1.3047	0.000357836		1.30642	0.00182214		1.29952	0.000971652		1.30323	0.000613303		1.30777	0.00218105		1.30403	0.00100543		1.30382	0.000917934		1.30455	0.00130649		1.30368	0.000617078		1.3009	0.000955547		1.30282	0.000880837		1.3035	0.00631218		1.30353	0.00133069		1.30213	0.000896346		1.30806	0.000876998
1.31435	0.00074036		1.31491	0.000821282		1.3122	0.00089488		1.31174	0.00206445		1.30389	0.000956772		1.3101	0.000915477		1.31121	0.0021888		1.30871	0.000969244		1.30945	0.000639276		1.30892	0.00105238		1.3115	0.000814053		1.30808	0.000757725		1.30688	0.000863827		1.31038	0.00421412		1.30884	0.00154895		1.30994	0.000343911		1.31181	0.000387234
1.31872	0.000761693		1.32335	0.000575272		1.31907	0.000755946		1.31611	0.00171031		1.30921	0.00227183		1.31792	0.001398		1.31621	0.00247315		1.3134	0.00143252		1.31789	0.000907427		1.31424	0.00135146		1.31837	0.000310437		1.3159	0.00122257		1.31344	0.000690447		1.31444	0.0048854		1.3129	0.00154195		1.31556	0		1.3165	0.000211697
1.32279	0.00105029		1.32898	0.000754009		1.32345	0.000724151		1.32267	0.00118232		1.31702	0.00177054		1.32354	0.000952129		1.32371	0.00204081		1.32059	0.000738688		1.32414	0.000426184		1.32205	0.00185926		1.32244	0.000802665		1.32121	0.00114482		1.32126	0.000614209		1.31975	0.00283639		1.31947	0.000883701		1.31963	0.00107011		1.324	0.0011189
1.32966	0.000915124		1.33242	0.00111701		1.32845	0.00127391		1.3308	0.00101594		1.32389	0.00143757		1.3276	0.000846754		1.33058	0.00189257		1.3284	0.000403039		1.32757	0.00127582		1.32924	0.00219471		1.32775	0.000991205		1.32558	0.000767106		1.32719	0.0004687		1.32788	0.00541196		1.32759	0.000947263		1.3265	0.00179934		1.33118	0.0012711
1.33685	0.000772104		1.33804	0.00160212		1.33563	0.000880235		1.33643	0.00129933		1.32827	0.00262547		1.33416	0.000838007		1.33527	0.002453		1.3334	0.000972494		1.33257	0.00101776		1.33392	0.00166358		1.33587	0.00145644		1.33215	0.000765647		1.33125	0.000710531		1.33507	0.00461313		1.33353	0.00146358		1.33463	0.00103355		1.33587	0.0014194
1.34216	0.000870238		1.34585	0.000931957		1.34345	0.000647843		1.34049	0.00138107		1.33358	0.0014942		1.34229	0.000454615		1.34027	0.00152196		1.33778	0.000686033		1.34039	0.000530839		1.33861	0.000990374		1.34306	0.000991626		1.34027	0.00153338		1.3375	0.000741682		1.33882	0.00501704		1.33728	0.000947469		1.33994	0.000825629		1.34056	0.00131801
1.34654	0.000806408		1.3521	0.000815561		1.34845	0.000885245		1.34705	0.000976729		1.34139	0.00180958		1.34823	0.000550827		1.34746	0.00264283		1.34496	0.00146567		1.34695	0.000745611		1.34611	0.000990163		1.34681	0.000832612		1.34589	0.000965344		1.34594	0.000510303		1.34319	0.00454526		1.34384	0.00139611		1.34369	0.000229677		1.34775	0.000949318
1.3531	0.00127848		1.35648	0.000428889		1.35282	0.00129357		1.35518	0.0005672		1.34889	0.0022811		1.35229	0.000332579		1.35496	0.00270636		1.35278	0.00150663		1.35133	0.00060334		1.35361	0.000930262		1.35118	0.000813632		1.34996	0.000788576		1.35157	0.000651918		1.35069	0.00433922		1.35228	0.00143581		1.34932	0.000607133		1.35525	0.000648594
1.36091	0.00104415		1.36179	0.000562252		1.3597	0.0011793		1.3608	0.00178417		1.35264	0.00190794		1.35854	0.000688065		1.35996	0.00285151		1.35747	0.000881268		1.35632	0.000942732		1.35861	0.000952331		1.35868	0.0012622		1.35652	0.000273073		1.35532	0.00095687		1.35757	0.00402442		1.3579	0.000607853		1.35713	0.000466305		1.36087	0.000889356
1.36716	3.9253e-06		1.36929	0.00093827		1.36782	0.000833795		1.36455	0.00176073		1.35702	0.00117765		1.36698	0.000982118		1.36434	0.00191788		1.36122	0.000605208		1.36382	0.000667016		1.36298	0.00129724		1.36556	0.00146171		1.36465	0.00102517		1.36094	0.00101015		1.36226	0.00499742		1.36134	0.000181842		1.36306	0.00132276		1.36525	0.000849992
1.37122	0.000159746		1.37648	0.000659117		1.37313	0.00034878		1.37018	0.00118108		1.36452	0.00101726		1.3726	0.00119141		1.37121	0.00175879		1.36778	0.000821029		1.37132	0.00050562		1.37048	0.000961999		1.37025	0.00105511		1.37027	0.00098348		1.36875	0.000837595		1.36694	0.00597695		1.36696	0.000590368		1.36744	0.00141644		1.37181	0.00114591
1.37716	0.000782173		1.38116	0.000650831		1.3772	0.000299449		1.37799	0.00103627		1.37171	0.00103523		1.37604	0.000914436		1.37933	0.00178074		1.37559	0.000796544		1.37632	0.000506251		1.37861	0.000373282		1.37494	0.00117152		1.37402	0.00189671		1.37469	0.000727746		1.37413	0.00656892		1.37478	0.000579055		1.37307	0.00121971		1.37962	0.00130405
1.38529	0.00114143		1.38585	0.000368521		1.38407	0.00109413		1.38393	0.00114374		1.37671	0.00105204		1.38166	0.000482312		1.38465	0.00171876		1.3809	0.000857216		1.38101	0.000587579		1.3833	0.00118941		1.38212	0.00163		1.37965	0.00116379		1.37907	0.00101159		1.38194	0.00682729		1.38103	0.000222365		1.38088	0.00148293		1.38556	0.00131527
1.39154	0.00147679		1.39335	0.000330643		1.3922	0.000881198		1.3883	0.00119332		1.38108	0.00105514		1.38948	0.000570611		1.38902	0.0017952		1.38527	0.00128712		1.38789	0.000619732		1.38673	0.00161839		1.38993	0.00169243		1.38746	0.00158966		1.38469	0.000196334		1.38726	0.00507427		1.3854	0.000536474		1.38775	0.000752495		1.38962	0.000920939
1.39591	0.000901641		1.40116	0.00083667		1.39751	0.000692549		1.39393	0.00122755		1.38796	0.0014167		1.39573	0.000618926		1.3959	0.00152402		1.39153	0.00138203		1.3957	0.000846904		1.39361	0.00150931		1.39525	0.000893139		1.39371	0.00136703		1.39219	0.000663394		1.39163	0.00291979		1.39071	0.00135168		1.39213	0.00136265		1.39618	0.0009127
1.40154	0.000853		1.40617	0.000791295		1.40095	0.000357643		1.40174	0.00128875		1.39608	0.00132452		1.4001	0.000693063		1.40402	0.00196049		1.39965	0.0010141		1.40101	0.000924239		1.40111	0.00163815		1.39962	0.000904738		1.39809	0.00138496		1.39938	0.000797016		1.39819	0.00491892		1.39853	0.000485048		1.39713	0.00117105		1.40431	0.00116765
1.40966	0.00103698		1.41054	0.00108682		1.4072	0.00128316		1.40861	0.000996231		1.40171	0.000972618		1.40541	0.0010396		1.40934	0.00127531		1.4059	0.000392854		1.40539	0.000592833		1.40642	0.00107823		1.40619	0.000951135		1.4034	0.00155297		1.40407	0.000350449		1.40632	0.00517321		1.40571	0.000689929		1.40494	0.000579331		1.40993	0.00107245
1.41622	0.000840883		1.41804	0.00114107		1.4147	0.00134906		1.41299	0.000971543		1.40577	0.00158695		1.41291	0.000858416		1.41277	0.00207645		1.41028	0.000613226		1.41226	0.000347378		1.4108	0.000727437		1.41431	0.00105679		1.41121	0.00174204		1.40875	0.00069639		1.41194	0.00630155		1.4104	0.00110709		1.41244	0.000866427		1.41337	0.000775841
1.41997	0.000739165		1.42585	0.000723233		1.42064	0.000660176		1.41799	0.00106677		1.41202	0.00119196		1.4201	0.000766368		1.41902	0.00250001		1.4159	0.00103923		1.42039	1.11379e-05		1.41736	0.00125646		1.41994	0.00136681		1.4184	0.00125801		1.41625	0.00138274		1.41601	0.00402442		1.41478	0.000886375		1.41681	0.00118163		1.41931	0.000452231
1.42497	0.00111873		1.43023	0.00113516		1.42501	0.0008363		1.4258	0.000676947		1.42014	0.00139989		1.42479	0.000771783		1.42652	0.00203358		1.42372	0.00125224		1.42539	0.000872752		1.42517	0.00146938		1.424	0.00133222		1.42277	0.000721871		1.42375	0.00115689		1.42257	0.00193781		1.42228	0.000797923		1.42151	0.00113267		1.42681	0.000708098
1.43247	0.00100882		1.43429	0.000559095		1.43063	0.000880427		1.4333	0.00109602		1.42608	0.000998514		1.42979	0.000747209		1.43246	0.00244448		1.43059	0.00116166		1.42914	0.000964167		1.43143	0.00167746		1.43056	0.00144821		1.42746	0.000816718		1.42875	0.000891494		1.43069	0.00445369		1.42978	0.000467152		1.42932	0.0010541		1.43306	0.00137065
1.43904	0.000959839		1.44085	0.000950501		1.43845	0.000765966		1.43799	0.000859306		1.43014	0.00120664		1.43729	0.000788235		1.43684	0.00205708		1.43465	0.00102797		1.43539	0.0010518		1.4358	0.001536		1.43869	0.00124196		1.43527	0.00058054		1.43313	0.000829602		1.43663	0.00559266		1.43478	0.000515698		1.43682	0.00143155		1.43743	0.000689789
1.44372	0.00131193		1.44835	0.00122374		1.44563	0.00068118		1.44236	0.00104872		1.43639	0.00113591		1.44479	0.000748042		1.44277	0.00178281		1.44027	0.00116556		1.4432	0.000949037		1.44142	0.00130018		1.44431	0.00078031		1.44277	0.000683099		1.44063	0.00119194		1.44007	0.00459514		1.43947	0.00137718		1.44119	0.00192052		1.44275	0.00116353
1.44872	0.00120833		1.45367	0.000750063		1.45001	0.000850752		1.44986	0.000657653		1.44483	0.00146154		1.44979	0.00117663		1.45059	0.00202738		1.4484	0.00123209		1.44883	0.000683617		1.44923	0.0016205		1.44775	0.000535672		1.44746	0.00121903		1.44844	0.00118702		1.44569	0.0053907		1.44665	0.00107891		1.44494	0.0014512		1.45056	0.00202245
1.45591	0.00103766		1.45804	0.000945372		1.45501	0.000704881		1.45768	0.000577573		1.45077	0.00144801		1.45417	0.00103606		1.45715	0.00209608		1.45527	0.000982245		1.4532	0.000253441		1.45611	0.00130438		1.45337	0.000755424		1.45215	0.00108458		1.45282	0.00101343		1.45351	0.0072214		1.45447	0.000748348		1.45182	0.000906621		1.45775	0.000954811
1.46372	0.000862558		1.46429	0.00120559		1.46282	0.000434336		1.46205	0.000732754		1.45421	0.00172397		1.46167	0.000675779		1.46152	0.00172547		1.45903	0.00134758		1.45883	7.04001e-05		1.46017	0.00132204		1.46119	0.000854545		1.45965	0.000749387		1.45657	0.000590845		1.45975	0.00500314		1.45915	0.00109948		1.45932	0.000925055		1.46243	0.000766915
1.46872	0.000399705		1.47242	0.000672137		1.47001	0.000405432		1.46611	0.00100764		1.45983	0.0014254		1.46948	0.000525004		1.46684	0.00221876		1.46371	0.000863283		1.46664	0.00040685		1.46548	0.0007081		1.46743	0.000757112		1.46746	0.000486737		1.46344	0.00105524		1.46413	0.00480936		1.4629	0.00104209		1.46463	0.00111061		1.46712	0.00101866
1.4731	0.000447492		1.47866	0.000496951		1.4747	0.000518737		1.47299	0.00144414		1.46733	0.00107369		1.47385	0.000661826		1.47465	0.00284893		1.47121	0.000914422		1.47351	0.000805294		1.47361	0.00099773		1.47181	0.000171246		1.47183	0.000844233		1.47094	0.00106795		1.46944	0.00203347		1.46946	0.00121056		1.469	0.0010402		1.47462	0.00156862
1.47997	0.000580272		1.48273	0.0010886		1.4797	0.00122689		1.48018	0.00163418		1.47389	0.00151739		1.47792	0.000608305		1.48184	0.00216091		1.4784	0.00102688		1.47789	0.00061784		1.4808	0.00156186		1.47712	0.000592192		1.47559	0.00104143		1.47625	0.000667084		1.47694	0.00095255		1.47696	0.000440411		1.47557	0.00148293		1.48243	0.000960532
1.4881	0.00103545		1.48835	0.000569156		1.4872	0.000432988		1.48549	0.000880675		1.47827	0.00173518		1.48448	0.0010169		1.48621	0.00213017		1.48309	0.00111659		1.4832	0.000562361		1.48455	0.00156984		1.48494	0.000822489		1.48246	0.00113002		1.48063	0.000843128		1.48413	0.00342918		1.48228	0.0003787		1.48369	0.00132427		1.48712	0.00125805
1.49341	0.000922975		1.49648	0.000623803		1.4947	0.00113748		1.48986	0.000517617		1.48358	0.00151835		1.49229	0.00155523		1.49121	0.00142433		1.48778	0.00197641		1.49101	0.00120059		1.48892	0.00100446		1.49212	0.00112259		1.48996	0.00098473		1.48719	0.00103106		1.48882	0.00558448		1.48665	0.000925047		1.48963	0.00179753		1.4915	0.000921168
1.49779	0.00106992		1.50304	0.000531081		1.49907	0.000979858		1.49643	0.000891048		1.49108	0.00117572		1.4976	0.000912353		1.49902	0.00165212		1.49465	0.00123989		1.4982	0.000924659		1.49642	0.000228467		1.49681	0.0011015		1.49527	0.00135432		1.495	0.000663394		1.49351	0.0056826		1.49322	0.00187745		1.49369	0.00122364		1.49931	0.000696884
1.50435	0.00111856		1.5071	0.000592238		1.50313	0.000474995		1.50455	0.000992289		1.49858	0.000762364		1.50167	0.000715555		1.50621	0.00280244		1.50277	0.00118268		1.50257	0.000748133		1.50361	0.000421203		1.5015	0.000949869		1.49965	0.00110334		1.50126	0.000894568		1.50101	0.00556568		1.50103	0.00139817		1.49963	0.00129828		1.50712	0.000902173
1.51247	0.001244		1.51273	0.000462822		1.51032	0.000195394		1.51049	0.00139684		1.50327	0.00143158		1.50823	0.000759704		1.51058	0.00213353		1.50809	0.00147153		1.50758	0.000142271		1.50799	0.00110429		1.509	0.00120906		1.50621	0.000485486		1.50531	0.00111017		1.50851	0.00659999		1.50728	0.000389396		1.50775	0.00037383		1.5115	0.000922541
1.51779	0.000512176		1.52085	0.000358657		1.51751	0.000129106		1.51455	0.00139933		1.50765	0.00172203		1.51604	0.0010169		1.51465	0.0016609		1.51215	0.00143837		1.51539	0.000577492		1.51267	0.00155786		1.5165	0.00109075		1.51402	0.000348741		1.51125	0.000873869		1.5135	0.00431387		1.51165	0.000608264		1.514	0.000507103		1.51525	0.000915218
1.52122	0.000454319		1.52773	0.000694627		1.52282	0.000748045		1.52049	0.00118149		1.51514	0.00152917		1.52229	0.00112894		1.52152	0.00260977		1.51871	0.000793943		1.52289	0.00115036		1.51986	0.0010612		1.52119	0.000567096		1.52027	0.00102475		1.51907	0.000760537		1.51788	0.00347334		1.51728	0.000405852		1.51806	0.000461168		1.52212	0.00144869
1.52747	0.000366766		1.53148	0.000761111		1.5272	0.000635125		1.52861	0.00119021		1.52264	0.00160531		1.52666	0.000687857		1.52902	0.0017655		1.52684	0.00072872		1.52664	0.000901753		1.52767	0.000716508		1.52588	0.0011867		1.52433	0.00149606		1.52563	0.00101241		1.52538	0.00441526		1.52509	0.000543468		1.52369	0.000704746		1.52962	0.00177436
1.53497	0.0014744		1.53616	0.000285466		1.53376	0.000731473		1.53518	0.00166115		1.52764	0.00076507		1.53229	0.00128117		1.53402	0.00162888		1.53278	0.00138983		1.5307	0.000765576		1.53299	0.00117113		1.53337	0.000969061		1.53027	0.000997029		1.53	0.00128416		1.53319	0.00504239		1.53196	0.000790517		1.53212	0.000934423		1.53493	0.00118367
1.54091	0.00198829		1.54367	0.000837064		1.54188	0.000884667		1.53924	0.00139663		1.53202	0.00145149		1.5401	0.00151233		1.5384	0.00173554		1.53684	0.000681699		1.53789	0.000777134		1.53736	0.00167851		1.54119	0.00103866		1.53809	0.000809213		1.53532	0.000597199		1.53788	0.00160094		1.53603	0.000567947		1.53869	0.00117982		1.53931	0.00180045
1.54529	0.000786781		1.55054	0.000808064		1.54782	0.000228537		1.54486	0.00115722		1.53921	0.00112393		1.54698	0.0015015		1.54527	0.00182155		1.54309	0.000398705		1.54539	0.00123379		1.54392	0.00192715		1.54556	0.000670856		1.54465	0.000898014		1.54344	0.000690447		1.54163	0.00258701		1.54134	0.000584197		1.54213	0.001233		1.54556	0.000916591
1.55122	0.00158995		1.55523	0.00086784		1.55188	0.000333557		1.55299	0.00133564		1.54733	0.0011162		1.55135	0.00121369		1.5534	0.00175001		1.55153	0.000953426		1.55007	0.00155595		1.55205	0.00167956		1.54931	0.001235		1.54902	0.00124676		1.55032	0.00105545		1.54819	0.00659999		1.54947	0.0014753		1.54712	0.00135721		1.55368	0.00122487
1.55904	0.000800264		1.55991	0.000772159		1.55813	0.000427978		1.55955	0.00120431		1.55202	0.00122152		1.55666	0.000807811		1.55902	0.000830581		1.55715	0.00111117		1.55476	0.000690552		1.55767	0.0020148		1.55619	0.00102221		1.55464	0.00155527		1.55407	0.00140262		1.55569	0.0051405		1.55634	0.00156088		1.55462	0.00104956		1.55993	0.00136333
1.56591	0.000736264		1.5671	0.000594211		1.56626	0.00091492		1.5633	0.00109021		1.55546	0.000920248		1.56479	0.000821763		1.56308	0.00110796		1.56059	0.000779642		1.56164	0.000868549		1.56174	0.00165244		1.56369	0.000824176		1.56277	0.001095		1.55875	0.00145549		1.561	0.00401461		1.56009	0.000972565		1.56151	0.000328801		1.564	0.000478779
1.57029	0.00133889		1.57492	0.00148158		1.57251	0.0011132		1.5683	0.000523841		1.56233	0.000793284		1.57167	0.00130803		1.56934	0.00183782		1.56621	0.000465445		1.56945	0.00128212		1.5683	0.00146307		1.56869	0.000612438		1.56934	0.00141247		1.56625	0.000974495		1.56538	0.00417324		1.56478	0.00124656		1.56588	0.000611062		1.56962	0.00019705
1.57529	0.0014075		1.57991	0.00117659		1.57657	0.000711626		1.5758	0.00062114		1.56983	0.000977836		1.57542	0.00164623		1.57746	0.00225362		1.57403	0.000919405		1.57507	0.0015902		1.57642	0.000919753		1.57337	0.000805406		1.57308	0.00132743		1.57313	0.000948878		1.57194	0.00568342		1.57228	0.00123216		1.57087	0.000147477		1.57775	0.00080422
1.5831	0.00107845		1.58429	0.00055949		1.5822	0.000472683		1.58236	0.000927976		1.57514	0.00136085		1.57979	0.000812184		1.58371	0.00256871		1.57997	0.00137727		1.57914	0.00104991		1.58204	0.00107445		1.57994	0		1.57777	0.000683725		1.57782	0.000826732		1.57976	0.00559184		1.57947	0.00110154		1.57837	0.000761561		1.58431	0.000760965
1.5906	0.000524293		1.59116	0.000958392		1.59032	0.000523362		1.58705	0.00146364		1.57952	0.00139641		1.58729	0.000679735		1.58777	0.00179055		1.58434	0.00083208		1.58539	0.000565933		1.58549	0.00151078		1.58775	8.39362e-05		1.58559	0.000522382		1.58251	0.000463782		1.586	0.00511597		1.58415	0.000947469		1.58587	0.00177879		1.58837	0.000962592
1.59497	0.000687964		1.59898	0.00168892		1.59688	0.000327198		1.59205	0.00174952		1.58577	0.00101687		1.59448	0.00112873		1.59371	0.00169577		1.58996	0.00146459		1.59351	0.000371125		1.59142	0.00174682		1.59369	0.000593247		1.59246	0.000991192		1.58969	0.00105422		1.59007	0.00539888		1.58884	0.000689312		1.59088	0.00181536		1.594	0.0012933
1.59966	0.000891572		1.6046	0.001292		1.60032	0.000227767		1.59924	0.000815324		1.5939	0.00113166		1.59917	0.00138196		1.60183	0.0016077		1.59778	0.00189342		1.59976	0.000478721		1.59923	0.000926478		1.59775	0.000890819		1.59683	0.00086758		1.5975	0.00171228		1.59569	0.00771689		1.59603	0.000697951		1.59525	0.000824722		1.60243	0.000860977
1.60747	0.00121994		1.60866	0.000650042		1.60532	0.000312167		1.60674	0.000984198		1.60014	0.00128452		1.60385	0.000231576		1.60808	0.002945		1.60496	0.00139287		1.60382	0.000851527		1.60517	0.000988902		1.60369	0.0005846		1.60183	0.000601177		1.60282	0.00139278		1.60382	0.00372762		1.60353	0.000100383		1.60212	0.00163887		1.609	0.00104796
1.61497	0.00117181		1.61523	0.000689301		1.61313	0.000717407		1.61205	0.000902666		1.60452	0.00205442		1.61104	0.000620175		1.61183	0.0032136		1.60934	0.00125527		1.60976	0.000365661		1.60955	0.00166863		1.61181	0.000267414		1.60902	0.00152441		1.60688	0.000701718		1.61038	0.00234254		1.60884	0.000477437		1.61025	0.00161227		1.61243	0.00146792
1.61935	0.00105268		1.62335	0.00117165		1.6197	0.00048752		1.61643	0.00103503		1.61014	0.00183393		1.61885	0.00125888		1.61715	0.00189593		1.61434	0.00118723		1.61789	0.000342124		1.61517	0.00146328		1.61837	0.000408081		1.61684	0.00157069		1.61344	0.000814026		1.61475	0.00440708		1.61321	0.00161024		1.61557	0.000749473		1.61743	0.00166817
1.62341	0.000844467		1.62898	0.0013137		1.62438	0.000641677		1.62299	0.00078628		1.61796	0.00159546		1.62416	0.0010398		1.62465	0.00167666		1.62184	0.000678015		1.62414	0.000707574		1.62298	0.000749926		1.62244	0.000166607		1.62183	0.00111647		1.62157	0.000585517		1.62007	0.00500314		1.61978	0.00121797		1.61963	5.19795e-05		1.62493	0.00115552
1.63029	0.00122062		1.63242	0.00085403		1.62938	0.000930336		1.63111	0.000381315		1.62483	0.00139738		1.62854	0.0012012		1.63121	0.000876036		1.62934	0.00103338		1.62789	0.000403277		1.63017	0.000699903		1.62806	0.000776725		1.62589	0.00116963		1.62719	0.000866696		1.6282	0.00133275		1.62759	0.00117271		1.6265	0.00105682		1.63181	0.00109075
1.63779	0.00140784		1.63835	0.000313283		1.63688	0.000946329		1.63674	0.00146717		1.62921	0.000960057		1.6351	0.00145173		1.63558	0.000923557		1.63403	0.00148929		1.6332	0.000662182		1.63455	0.00102716		1.63618	0.00114874		1.63277	0.000972015		1.63125	0.00134175		1.63507	0.00312011		1.63353	0.00100363		1.63463	0.000967968		1.6365	0.00081635
1.64279	0.000887817		1.64616	4.85311e-05		1.64438	0.000935346		1.6408	0.00166073		1.63452	0.00103465		1.64323	0.00109041		1.6409	0.00107128		1.63872	0.00134606		1.64101	0.000976776		1.63955	0.000988062		1.64275	0.00105806		1.64089	0.00049987		1.63782	0.00206355		1.63882	0.00143005		1.63759	0.000550051		1.63994	0.00117861		1.64118	0.00139812
1.64716	0.000771933		1.6521	0.000452958		1.64938	0.000897192		1.64768	0.00168998		1.64265	0.00177808		1.64885	0.000845088		1.6484	0.00220249		1.64621	0.000762957		1.64726	0.000464641		1.64705	0.00140422		1.6465	0.00111816		1.64621	0.000623065		1.64594	0.0012776		1.64351	0.00103186		1.64384	0.000386928		1.64338	0.0011638		1.64868	0.00173431
1.65404	1.96269e-05		1.65617	0.000708042		1.65376	0.00036169		1.6558	0.0014485		1.64983	0.00201055		1.65292	0.00074346		1.6559	0.00169835		1.65403	0.00116708		1.65164	0.000429126		1.65455	0.00137311		1.65118	0.000930467		1.65027	0.00125092		1.65157	0.0013977		1.65101	0.00225178		1.65228	0.00113445		1.64962	0.00113569		1.65618	0.00139514
1.66185	0.000396121		1.66179	0.00108584		1.66095	0.00042316		1.66111	0.000954116		1.65358	0.00153884		1.65948	0.0010094		1.66058	0.0020044		1.6584	0.00126242		1.65695	0.000937688		1.65923	0.00118941		1.65869	0.000320138		1.65714	0.000689353		1.655	0.00156411		1.65788	0.00431142		1.6579	0.00115297		1.65712	0.000814749		1.66118	0.000431175
1.66779	0.000684551		1.6696	0.00115035		1.66876	0.000905671		1.66455	0.00101801		1.65796	0.000758306		1.6676	0.000398386		1.66496	0.00170326		1.66215	0.000616476		1.66445	0.000653566		1.66392	0.000829165		1.66556	0.000495391		1.66558	0.000752097		1.66094	0.000734304		1.66257	0.00522472		1.66134	0.000953846		1.66307	0.000952858		1.66556	0.000600533
1.67185	0.00071749		1.67679	0.000966481		1.67407	0.000703725		1.6708	0.00162837		1.66546	0.00147816		1.67323	0.000210543		1.67215	0.00141994		1.66903	0.000378337		1.67195	0.000700009		1.67174	0.00104376		1.67025	0.000972646		1.6709	0.000723122		1.66844	0.000818945		1.66726	0.00634816		1.66697	0.00103263		1.66713	0.00142853		1.67243	0.0012878
1.6781	0.000853854		1.68116	0.00103454		1.67813	0.000772132		1.6783	0.0014263		1.67264	0.00162155		1.67698	0.000356111		1.67996	0.0017686		1.67653	0.000680832		1.67664	0.00084144		1.67955	0.00102968		1.67493	0.00161651		1.67433	0.000712074		1.67438	0.000850916		1.67444	0.0075321		1.67478	0.00131444		1.67306	0.00119674		1.68056	0.00136699
1.68622	0.00109637		1.68616	0.00147468		1.68532	0.000821077		1.68424	0.00144974		1.67733	0.00118925		1.6826	0.00086154		1.68527	0.00220972		1.68184	0.000951042		1.68101	0.00105684		1.68361	0.00210265		1.68213	0.00169285		1.68058	0.000444629		1.67875	0.000768324		1.68226	0.00459514		1.68072	0.000635006		1.68087	0.00198761		1.68618	0.00107748
1.69247	0.000964106		1.69366	0.0015893		1.69313	0.00112322		1.68862	0.00143667		1.68202	0.00124317		1.69041	0.00064579		1.68934	0.0019592		1.68621	0.00116036		1.68851	0.000325732		1.68767	0.00173652		1.68994	0.000533141		1.68839	0.0011665		1.68438	0.000734714		1.68757	0.00381266		1.68509	0.000453781		1.68775	0.00158145		1.69025	0.000537367
1.69654	0.00100882		1.70116	0.00154037		1.69845	0.000992576		1.69455	0.00167836		1.68921	0.00105475		1.69635	0.000713472		1.69652	0.00125181		1.69278	0.000579206		1.69632	0.0008696		1.69455	0.000726596		1.69493	0.00032309		1.69434	0.00109855		1.69219	0.000617078		1.69163	0.00440871		1.69071	0.000864159		1.69213	0.00151315		1.69681	0.000697113
1.70247	0.000681308		1.70585	0.00124149		1.70189	0.000652468		1.70236	0.00132609		1.69702	0.00143912		1.70042	0.00113393		1.70434	0.00113249		1.70059	0.000798277		1.70133	0.000647262		1.70205	0.00152676		1.69931	0.000893139		1.6984	0.000956589		1.69938	0.000500466		1.69851	0.00519201		1.69822	0.00130786		1.69744	0.00193261		1.70493	0.000271887
1.7106	0.000379396		1.71054	0.00128805		1.70813	0.000754597		1.70892	0.000825075		1.70264	0.00132549		1.70604	0.00188593		1.70965	0.00138301		1.70684	0.00111572		1.7057	0.000528106		1.70736	0.00178255		1.70618	0.00131282		1.70402	0.000933868		1.70376	0.000768734		1.70663	0.00863346		1.7054	0.000980176		1.70494	0.00099154		1.71056	0.000871047
1.71685	0.000668508		1.71804	0.000951093		1.71595	0.000655359		1.7133	0.00116676		1.70671	0.00123756		1.71385	0.000930055		1.7134	0.00220404		1.7109	0.000409323		1.71289	0.000509613		1.71174	0.00135441		1.71431	0.00113419		1.71183	0.00121319		1.70875	0.00059392		1.71226	0.0102998		1.71009	0.000712762		1.71212	0.00104201		1.714	0.0010626
1.72029	0.000467802		1.72585	0.000999624		1.72157	0.000694091		1.7183	0.000994986		1.71327	0.00123331		1.72104	0.00117975		1.71965	0.00200517		1.71684	0.000378986		1.7207	0.000853418		1.7183	0.00146202		1.71962	0.000964421		1.71902	0.00149106		1.71625	0.000797631		1.716	0.00469489		1.71478	0.000224628		1.71682	0.0009997		1.71993	0.000887983
1.7256	0.000704007		1.73023	0.00104401		1.72595	0.000471334		1.72611	0.00109063		1.72139	0.00145709		1.72541	0.000980452		1.72746	0.00351267		1.72465	0.00120933		1.7257	0.00163286		1.72642	0.00104271		1.72369	0.00108779		1.7234	0.00105644		1.72376	0.000999088		1.72288	0.00477665		1.72259	5.88311e-05		1.7215	0.000877911		1.72775	0.000753641
1.7331	0.000562182		1.73429	0.0011827		1.73188	0.000558625		1.7333	0.00161198		1.72733	0.00173324		1.73041	0.000425043		1.73308	0.00349072		1.73153	0.00123902		1.72945	0.00104444		1.73236	0.00134348		1.73056	0.001173		1.72839	0.000801084		1.72844	0.00116345		1.73132	0.00341692		1.73009	0.000705356		1.72931	0.000442128		1.73368	0.000796438
1.73966	0.00081699		1.74116	0.00163822		1.7397	0.000955386		1.73799	0.000977559		1.73139	0.00155739		1.73823	0.000273019		1.73746	0.00237398		1.73559	0.001031		1.7357	0.00104255		1.73643	0.00111543		1.73869	0.00109412		1.73621	0.000965136		1.73313	0.0011698		1.73663	0.00377096		1.73446	0.000861896		1.73681	0.000813541		1.73775	0.0012878
1.74435	0.00125731		1.74835	0.00126378		1.74657	0.00115926		1.74268	0.00106075		1.73764	0.00178871		1.74573	0.000674946		1.7434	0.00133549		1.74121	0.00118506		1.74351	0.00035116		1.74236	0.00103451		1.74431	0.0016608		1.74339	0.00115191		1.74063	0.00147168		1.74038	0.00389115		1.73915	0.00153043		1.74088	0.00118918		1.74368	0.00122349
1.74935	0.00104859		1.75367	0.00101028		1.75064	0.000884281		1.75049	0.0014487		1.74577	0.00156744		1.75042	0.00030384		1.75121	0.00151085		1.74934	0.00131508		1.74914	0.000464221		1.75049	0.00132519		1.74775	0.000562667		1.74777	0.000822554		1.74813	0.000706432		1.74601	0.00363359		1.74665	0.00074012		1.74494	0.00125506		1.7515	0.00126812
1.75685	0.000887817		1.75804	0.00126438		1.75595	0.000765773		1.75799	0.00112092		1.75139	0.00187876		1.75479	0.000880282		1.75777	0.00265523		1.7559	0.000909221		1.75351	0.000438162		1.75705	0.00185359		1.75369	0.000207731		1.75246	0.000582		1.7525	0.000794762		1.75382	0.00638413		1.75446	0.000354632		1.75213	0.000651255		1.75837	0.000973577
1.76435	0.00136842		1.7646	0.000913412		1.76376	0.000622408		1.76236	0.00086553		1.75514	0.00157903		1.7626	0.000525212		1.76215	0.00236778		1.75965	0.000826447		1.75945	0.000850056		1.76111	0.00119824		1.7615	0.000526604		1.76027	0.000517588		1.75657	0.00111119		1.76007	0.0042133		1.75884	0.000827338		1.75963	0.000838322		1.76275	0.000809255
1.76935	0.00111395		1.77241	0.000144213		1.77095	0.000194816		1.76643	0.00142734		1.76077	0.00120857		1.7701	0.000465027		1.76746	0.00187785		1.76465	0.000742372		1.76726	0.00145655		1.76674	0.000305393		1.76744	0.000829448		1.76808	0.000457345		1.76344	0.00152456		1.76413	0.0032215		1.76259	0.000872182		1.76463	0.00118646		1.76775	0.000698714
1.77404	0.000481114		1.77835	0.000536408		1.77532	0.000431446		1.77361	0.00174828		1.76858	0.00100064		1.77448	0.000458155		1.77527	0.00267227		1.77215	0.000381587		1.77382	0.0011056		1.77486	0.00107697		1.7715	0.000504671		1.77215	0.000600552		1.77094	0.00148254		1.76976	0.00287891		1.76946	0.0005879		1.769	0.00100363		1.77556	0.00100791
1.78091	0.000319832		1.78241	0.0015453		1.78032	0.000379418		1.7808	0.00120597		1.77483	0.00126423		1.77854	0.000673696		1.78215	0.00212733		1.77903	0.00104573		1.7782	0.000551853		1.78142	0.00117029		1.77744	0.00085328		1.77621	0.00128323		1.77594	0.00129379		1.77757	0.00420676		1.77696	0.00066689		1.77556	0.00109006		1.78275	0.00054881
1.78872	0.000816478		1.78835	0.000439148		1.78813	0.000425472		1.7858	0.00144352		1.77921	0.00118075		1.78542	0.000350072		1.78652	0.00205734		1.78371	0.000806945		1.78351	0.000604601		1.78517	0.00151583		1.78525	0.00107071		1.78339	0.00123258		1.78063	0.000302903		1.78445	0.00664414		1.78228	0.00109516		1.78369	0.00205652		1.78743	0.00199133
1.79372	0.000325294		1.79648	0.00111109		1.79564	0.000478078		1.79049	0.00155721		1.78452	0.0013394		1.79291	0.00134344		1.79183	0.00255605		1.7884	0.00065548		1.79164	0.000214143		1.79017	0.00107003		1.79212	0.0011401		1.79089	0.00131805		1.78719	0.000962199		1.78882	0.00788287		1.78665	0.00146255		1.78931	0.00214718		1.79243	0.000928949
1.7981	0.000529584		1.80304	0.000896051		1.7997	0.000601018		1.79705	0.0013346		1.79233	0.00109784		1.79792	0.00100024		1.79965	0.00266917		1.79559	0.00118441		1.79851	0.000978878		1.79767	0.000782084		1.7965	0.00133328		1.7959	0.00124717		1.795	0.00081833		1.79382	0.00365485		1.79321	0.000452341		1.79369	0.00157873		1.79993	0.00102072
1.80529	0.000866654		1.8071	0.000632286		1.80407	0.000710855		1.80486	0.000671346		1.79952	0.00146096		1.80229	0.000739087		1.80715	0.00182103		1.8034	0.000918322		1.80258	0.000441525		1.80455	0.00114633		1.8015	0.00162389		1.80027	0.0011419		1.80094	0.000333644		1.80163	0.00318471		1.80134	0.000896455		1.79963	0.0021233		1.80743	0.00072984
1.8131	0.00126653		1.81273	0.00154412		1.81126	0.00098429		1.81049	0.000748937		1.80389	0.00124085		1.80885	0.000903398		1.8109	0.00223141		1.8084	0.00102862		1.80789	0.000651674		1.80892	0.0010074		1.80931	0.00161292		1.80714	0.00148397		1.80501	0.00119194		1.80913	0.00313729		1.80728	0.000582963		1.80775	0.00156906		1.81181	0.00108664
1.81841	0.00134982		1.82117	0.000891119		1.81845	0.00152288		1.81486	0.000884409		1.80889	0.000891647		1.81698	0.000619134		1.81527	0.00236003		1.81278	0.00102082		1.81601	0.000908898		1.81393	0.00142335		1.8165	0.000952611		1.81527	0.00137287		1.81094	0.00110156		1.81351	0.00252487		1.81134	0.00053092		1.814	0.0017525		1.81587	0.000710615
1.82185	0.000803677		1.82773	0.000603878		1.82345	0.00108141		1.8208	0.00103212		1.8164	0.000565638		1.82291	0.000704934		1.82246	0.00159066		1.81965	0.000822113		1.8232	0.0011491		1.82111	0.00141704		1.82119	0.00110066		1.82089	0.00108875		1.81907	0.000695775		1.81819	0.00397782		1.81728	0.000667096		1.81807	0.00142672		1.82275	0.00155305
1.8281	0.00134453		1.83116	0.000666416		1.82782	0.000973885		1.82893	0.00134643		1.82389	0.000973198		1.82698	0.00131303		1.82996	0.000858732		1.82778	0.000536302		1.82695	0.000628558		1.82892	0.00100845		1.82587	0.00119873		1.82496	0.00112481		1.82563	0.00155653		1.826	0.00565889		1.8254	0.000629246		1.824	0.00133334		1.83025	0.00120862
1.83591	0.00117556		1.83617	0.000947739		1.8347	0.000814525		1.83549	0.00111511		1.82858	0.00140569		1.83292	0.00143777		1.83465	0.00116891		1.83309	0.00114974		1.83132	0.0008841		1.83392	0.00034848		1.83369	0.00124913		1.83121	0.000657876		1.82969	0.00118435		1.8335	0.00640621		1.83165	0.00101741		1.83213	0.00151557		1.83525	0.000986851
1.84154	0.00110337		1.84398	0.00130797		1.84251	0.000235667		1.83955	0.000924656		1.83296	0.00139274		1.84104	0.000997528		1.83934	0.00107903		1.83715	0.00114974		1.83882	0.000451192		1.8383	0.00104313		1.84119	0.000818271		1.83933	0.000505498		1.83532	0.000312126		1.83788	0.00460658		1.83571	0.000642205		1.83838	0.00121215		1.83962	0.00109716
1.84591	0.00141621		1.85054	0.00104401		1.84845	0.000588493		1.84549	0.00077321		1.84046	0.000766229		1.8476	0.000738879		1.84621	0.000753619		1.84403	0.00126957		1.8457	0.000542187		1.84518	0.00150931		1.84525	0.00121939		1.84558	0.00113815		1.84344	0.000372378		1.84194	0.00430896		1.84134	0.000607442		1.84213	0.00101753		1.8465	0.00151621
1.85185	0.00129571		1.85523	0.00105486		1.85251	0.000522399		1.85361	0.00107693		1.84827	0.000850099		1.85166	0.000763036		1.85402	0.00142821		1.85215	0.00120673		1.8507	0.00125522		1.8533	0.00157068		1.84931	0.00201657		1.84965	0.000983897		1.85	0.000610315		1.84881	0.00412418		1.84978	0.00129614		1.84744	0.000760957		1.85431	0.00138644
1.85997	0.000971615		1.86023	0.00036931		1.85876	0.000560552		1.85986	0.00155119		1.85296	0.00114171		1.85729	0.000737421		1.85965	0.0011826		1.85777	0.00055017		1.85539	0.000518229		1.85861	0.00121443		1.8565	0.000981714		1.85558	0.000839647		1.85375	0.000371763		1.85632	0.00363523		1.85634	0.00162567		1.85494	0.00157812		1.86025	0.0016565
1.86654	0.00116498		1.86742	0.000955433		1.86688	0.000475188		1.86361	0.00130058		1.85671	0.000761591		1.86573	0.000512509		1.86402	0.00100026		1.86122	0.00072612		1.86226	0.000650414		1.86267	0.00179957		1.864	0.00106544		1.86402	0.00117088		1.85875	0.00059228		1.86132	0.00531793		1.86009	0.00142408		1.8615	0.00177275		1.86431	0.00106833
1.8706	0.000961546		1.87492	0.00117363		1.87282	0.000359378		1.86861	0.00103752		1.86327	0.00134404		1.87229	0.000378811		1.87059	0.00189748		1.86715	0.00118875		1.87008	0.000599347		1.86955	0.00185043		1.869	0.00129447		1.87027	0.000755224		1.86625	0.00141348		1.866	0.00525661		1.86509	0.000689723		1.86588	0.00136144		1.87025	0.00100928
1.87591	0.00135186		1.87991	0.00142358		1.87688	0.000391751		1.87642	0.000906607		1.87108	0.00205442		1.87573	0.000927139		1.8784	0.0010749		1.87465	0.00120023		1.8757	0.000474098		1.87768	0.000910715		1.87338	0.000858763		1.87402	0.00124196		1.87313	0.00107758		1.87256	0.00302854		1.87259	0.000284076		1.87088	0.00116803		1.87837	0.00130886
1.88372	0.00199682		1.88429	0.00160113		1.88313	0.000693512		1.88299	0.00131904		1.87639	0.00202196		1.88073	0.000994196		1.88434	0.000819734		1.88059	0.00199266		1.87976	0.000541766		1.88299	0.000791542		1.87994	0.00120969		1.87902	0.00159987		1.8775	0.000385289		1.88038	0.00518547		1.87946	0.00108899		1.87838	0.000612271		1.88493	0.00149927
1.89091	0.00149762		1.89117	0.00129239		1.89126	0.00124539		1.88736	0.00159248		1.88077	0.00176378		1.88823	0.000864039		1.88871	0.00120093		1.88496	0.00153762		1.88632	0.000417778		1.88642	0.00125205		1.88806	0.00086277		1.88683	0.000941164		1.8825	0.000264169		1.88632	0.00344226		1.88415	0.000808619		1.88588	0.000694471		1.889	0.000709929
1.89529	0.000619185		1.89929	0.00101915		1.89751	0.000491182		1.89236	0.00109996		1.88733	0.00149555		1.89479	0.000856542		1.89496	0.00158033		1.89059	0.00140934		1.89413	0.00082694		1.89268	0.0014223		1.89368	0.000515215		1.89339	0.0011294		1.88969	0.000655402		1.89038	0.00518711		1.88884	0.000140495		1.89087	0.0014515		1.89462	0.000187438
1.90029	0.000890889		1.9046	0.000984631		1.90095	0.0008706		1.89986	0.00156447		1.89514	0.00121476		1.89948	0.00143694		1.90308	0.00234014		1.8984	0.00172613		1.90007	0.00136808		1.90049	0.000482786		1.89806	0.000853701		1.89809	0.00120715		1.8975	0.00071299		1.89632	0.00504402		1.89603	1.43993e-05		1.89525	0.00159172		1.90306	0.00111616
1.9081	0.000941065		1.90866	0.0011247		1.90657	0.00111494		1.90737	0.00169268		1.90139	0.00111601		1.90448	0.000932554		1.90934	0.00222496		1.90559	0.00140587		1.90414	0.00082694		1.90642	0.000357728		1.904	0.00115338		1.90308	0.001159		1.9025	0.000616463		1.90444	0.00287973		1.90384	0.000489985		1.90244	0.00109852		1.90931	0.00084839
1.9156	0.00046729		1.91554	0.0013058		1.91407	0.00079699		1.91205	0.000910757		1.90577	0.00104083		1.91167	0.000719095		1.91277	0.00234427		1.90996	0.000945625		1.9107	0.000241252		1.9108	0.00221762		1.91212	0.000683509		1.91027	0.00108812		1.90657	6.6606e-05		1.91101	0.00166799		1.90884	0.0011324		1.91025	0.000370505		1.91275	0.00115964
1.91966	0.00043401		1.92366	0.000880466		1.92032	0.000637438		1.91674	0.000764911		1.91139	0.00134713		1.91948	0.00075304		1.91809	0.00172934		1.91496	0.00123252		1.91882	0.000462329		1.91643	0.0016949		1.91837	0.00092878		1.91777	0.000888008		1.91344	0.00133396		1.91507	0.00384291		1.91322	0.000951172		1.91556	0.00111152		1.91806	0.00122624
1.92404	0.000659633		1.92898	0.000913412		1.92501	0.00108411		1.92392	0.00067591		1.91952	0.00162618		1.92448	0.000482521		1.9259	0.00141142		1.92278	0.0014063		1.92476	0.00019607		1.92424	0.00143827		1.92275	0.000501297		1.92277	0.000746886		1.92157	0.00104602		1.92069	0.00369819		1.92009	0.00103654		1.91963	0.00115292		1.92556	0.000606712
1.93122	0.00075845		1.93241	0.000443291		1.93001	0.00105944		1.93174	0.000937312		1.92608	0.00102499		1.92885	0.00110311		1.93246	0.00125491		1.92996	0.00119958		1.9282	0.000820215		1.93111	0.00149145		1.92837	0.000653984		1.92746	0.000925321		1.92688	0.000719343		1.92913	0.00247745		1.92822	0.00113754		1.92682	0.000908736		1.93212	0.00072183
1.9381	0.00157373		1.93866	0.000655171		1.93751	0.00072049		1.93705	0.000685661		1.93014	0.0012679		1.93573	0.00103043		1.93684	0.00146333		1.93465	0.000635761		1.93382	0.0014328		1.93548	0.00176888		1.93681	0.000923718		1.93433	0.000854447		1.93125	0.000480997		1.93569	0.00400317		1.93353	0.0011036		1.93494	0.000698098		1.93681	0.000595956
1.9431	0.00131824		1.94617	0.00128095		1.94501	0.00048174		1.94111	0.00133004		1.93577	0.00177866		1.94385	0.000913186		1.94215	0.00222366		1.93934	0.00123967		1.94132	0.000778605		1.94079	0.00120875		1.94306	0.000968428		1.94215	0.00124196		1.93813	0.000892929		1.93913	0.00647326		1.93728	0.00128112		1.93994	0.000707466		1.94181	0.00113309
1.94779	0.000337241		1.9521	0.00111464		1.9497	0.000370554		1.9483	0.000846444		1.94389	0.00198041		1.94916	0.000368606		1.94965	0.00165522		1.94715	0.000822329		1.94789	0.000381002		1.94861	0.00121001		1.9465	0.00114136		1.94746	0.000732086		1.94626	0.0011075		1.94413	0.00655666		1.94415	0.000829395		1.94369	0.000639772		1.94931	0.00141253
1.95466	0.000990559		1.95648	2.84085e-05		1.95438	0.000506019		1.95643	0.00128025		1.95077	0.00150193		1.95323	0.000627881		1.95684	0.00116168		1.95465	0.000605425		1.95226	0.00082778		1.9558	0.000807726		1.95181	0.000164287		1.95184	0.00111856		1.95125	0.00153644		1.95194	0.00433513		1.95259	0.00114124		1.94994	0.000598974		1.95681	0.000839235
1.96247	0.00112846		1.96241	0.000655171		1.96157	0.000961167		1.96143	0.00134829		1.95452	0.0013394		1.9601	6.35168e-05		1.96152	0.000997679		1.95903	0.000208453		1.95757	0.000815802		1.96017	0.000745302		1.95931	0.000141721		1.95871	0.000976809		1.95469	0.00157764		1.9585	0.00325339		1.9579	0.00067121		1.95775	0.000453613		1.9615	0
1.9681	0.000767154		1.97023	0.000658525		1.96939	0.000746118		1.96486	0.00137962		1.95921	0.00144279		1.96823	0.00103585		1.96652	0.00151498		1.96309	0		1.96507	0.000227172		1.96517	0.00111417		1.96587	0.000691313		1.96684	0.000729793		1.96094	0.00126223		1.96288	0.00368265		1.96134	0.000993547		1.96338	0.00026292		1.96618	0.000717939
1.97247	0.00124417		1.97679	0.000945175		1.9747	0.00117968		1.97111	0.00151903		1.96671	0.00137457		1.97354	0.00115934		1.97371	0.00195223		1.96996	0.000585273		1.97257	0.000437112		1.97298	0.00154735		1.97025	0.000968217		1.97183	0.000808379		1.96875	0.00166207		1.96788	0.00629992		1.96759	0.0011324		1.96776	0.00065186		1.97306	0.00108892
1.97841	0.00131534		1.98117	0.00060664		1.97907	0.00129549		1.97892	0.00188749		1.97389	0.00119698		1.97698	0.000658077		1.98152	0.00169448		1.97715	0.000972711		1.97726	0.000455815		1.98048	0.00197507		1.97525	0.000556973		1.97559	0.000406691		1.97469	0.00151902		1.97538	0.00508327		1.97509	0.00103119		1.97369	0.00148656		1.98087	0.00109419
1.98654	0.00162749		1.98648	0.000154866		1.98626	0.000860194		1.98455	0.00191923		1.97858	0.00139429		1.98323	0.000835092		1.98652	0.00137681		1.98247	0.00128994		1.98195	0.000531679		1.98455	0.00145992		1.98275	0.000814475		1.98183	0.000494241		1.97875	0.00102962		1.98288	0.00629092		1.98103	0.000882467		1.9815	0.00206166		1.98618	0.00111959
1.99279	0.0011998		1.99429	0.00132553		1.99407	0.000724344		1.98893	0.00110287		1.98327	0.00138018		1.99073	0.00102335		1.9909	0.00184453		1.98684	0.00092764		1.98914	0.000777554		1.98892	0.00107676		1.99056	0.00125103		1.98965	0.000731669		1.98469	0.000818535		1.98788	0.00466218		1.9854	0.00147407		1.98806	0.00148686		1.99056	0.000954811
1.99685	0.000553648		2.00148	0.001495		1.99907	0.000261874		1.99486	0.00123813		1.99046	0.00125399		1.99667	0.00134781		1.99809	0.00264619		1.9934	0.000739121		1.99695	0.000247136		1.99579	0.00103661		1.99556	0.00150937		1.99527	0.00108708		1.99251	0.000831446		1.99225	0.00316181		1.99103	0.00169808		1.99212	0.000748566		1.99775	0.00187026
2.00279	0.000849246		2.00585	0.000822268		2.00251	0.00103054		2.00268	0.000773417		1.99827	0.0013081		2.00104	0.00139571		2.0059	0.00209918		2.00153	0.000863717		2.00164	0.000511505		2.00329	0.000374122		1.99962	0.000875002		1.99965	0.0017583		1.99938	0.000568302		1.99944	0.0040882		1.99884	0.00158412		1.99744	0.00121789		2.00556	0.0012196
2.01122	0.00103664		2.01054	0.0011681		2.00907	0.00101743		2.00924	0.000876525		2.00358	0.00147371		2.00698	0.00102502		2.0109	0.00214515		2.00746	0.000785059		2.00601	0.00110118		2.00861	0.000631174		2.00681	0.000634371		2.00558	0.00121632		2.00375	0.000616668		2.00725	0.00437192		2.00572	0.00139878		2.00557	0.00118405		2.01056	0.00121709
2.01747	0.00076852		2.01835	0.00156819		2.01657	0.00132941		2.01361	0.000963452		2.00796	0.0013968		2.01479	0.000906522		2.01433	0.00166581		2.01153	0.000701201		2.01351	0.00107029		2.01298	0.00092837		2.01462	0.000567939		2.0134	0.000901766		2.00876	0.00119809		2.01257	0.00633998		2.01009	0.000757194		2.01244	0.00103566		2.01431	0.00191099
2.02091	0.000929972		2.02585	0.00145988		2.0222	0.000781574		2.01893	0.000557449		2.01452	0.000997161		2.02135	0.00064704		2.0209	0.00205063		2.01747	0.00142667		2.02132	0.000627507		2.01954	0.0015503		2.01994	0.000746567		2.01996	0.00103872		2.01657	0.00113701		2.01663	0.00416915		2.01509	0.000486694		2.01681	0.00192959		2.02056	0.0014297
2.02622	0.00073541		2.03023	0.000920317		2.02657	0.000379804		2.02674	0.000557242		2.02233	0.000729899		2.02573	0.000213667		2.02871	0.00207671		2.02559	0.00137553		2.02601	0.0008551		2.02767	0.00108474		2.024	0.00151254		2.02433	0.000977851		2.02376	0.0013936		2.0235	0.000266551		2.0229	0.0010495		2.02182	0.00131853		2.02837	0.00144572
2.03372	0		2.03429	0.000452366		2.03251	0.000498504		2.03393	0.000912831		2.02796	0.00134617		2.03104	0.000596434		2.03402	0.00209634		2.03215	0.000843782		2.02976	0.00148429		2.03361	0.00176909		2.03119	0.00147352		2.02965	0.00125572		2.02844	0.00166289		2.03194	0.00348396		2.03009	0.00143581		2.02994	0.0004657		2.034	0.0014432
2.04029	0.000380078		2.04148	0.000845942		2.04063	0.000931877		2.0383	0.000993534		2.03202	0.00112026		2.03885	0.00106833		2.0384	0.00234737		2.03621	0.000746705		2.03664	0.00155952		2.03736	0.00202804		2.03931	0.000533352		2.03746	0.00127531		2.03313	0.00103044		2.03694	0.00438827		2.03478	0.000863542		2.03713	0.000807497		2.03806	0.00104727
2.04466	0.000664412		2.04866	0.000345834		2.0472	0.00125426		2.0433	0.000952456		2.0389	0.000313255		2.04604	0.000905481		2.04465	0.00196101		2.04215	0.000829914		2.04414	0.000907847		2.04361	0.000946025		2.04431	0.000796127		2.04465	0.000904684		2.04094	0.000674666		2.04069	0.00568505		2.03946	0.000926693		2.04119	0.0015331		2.044	0.00129147
2.04966	0.00130322		2.05366	0.000344058		2.05126	0.000452643		2.05111	0.00153999		2.04702	0.000748257		2.05073	0.000557075		2.05246	0.00113895		2.05028	0.00027281		2.04945	0.000964167		2.05173	0.000972928		2.04806	0.000560347		2.04902	0.000395018		2.04844	0.00050559		2.04694	0.00536944		2.04728	0.000711527		2.04557	0.00145361		2.05212	0.0011601
2.05747	0.0015297		2.05804	0.000864881		2.05688	0.000965021		2.0583	0.00132402		2.05233	0.0010876		2.05542	0.00106896		2.05871	0.00257465		2.05653	0.000782459		2.05382	0.000977407		2.05798	0.00129787		2.05431	0.000877954		2.05371	0.00135161		2.0525	0.00114726		2.05444	0.00480772		2.05478	0.000812734		2.05275	0.0018619		2.05868	0.00159883
2.06466	0.00100967		2.06491	0.000612361		2.0647	0.000723188		2.06236	0.00135576		2.05577	0.00116065		2.06323	0.000619551		2.06308	0.00217537		2.06028	0.00111681		2.06007	0.000993378		2.06205	0.000895582		2.06181	0.000802876		2.06184	0.00196029		2.05657	0.000582853		2.06038	0.00565807		2.05884	0.00101227		2.05963	0.00137867		2.06275	0.000917506
2.06935	0.00120219		2.07273	0.000963324		2.07157	0.000883703		2.06674	0.000771135		2.06202	0.00175431		2.07073	0.000686191		2.06871	0.00230244		2.06527	0.00103013		2.0682	0.00148198		2.06798	0.000717979		2.06775	0.00082755		2.06902	0.00153755		2.06344	0.00100401		2.06476	0.00507182		2.0629	0.000967422		2.06463	0.00147416		2.06806	0.000470082
2.07404	0.00114809		2.07867	0.00111701		2.07595	0.000427014		2.07393	0.000667404		2.06952	0.00126249		2.07479	0.000830093		2.07652	0.00192227		2.07277	0.00181368		2.07445	0.00118903		2.07611	0.0013336		2.07181	0.00131029		2.07308	0.00163135		2.07094	0.000931867		2.07038	0.00293287		2.07009	0.000922785		2.06932	0.00119402		2.07618	0.00060717
2.08154	0.000941577		2.08273	0.000912229		2.08126	0.000926289		2.08111	0.000685246		2.07546	0.000554043		2.07885	0.000587063		2.0834	0.00236804		2.07965	0.00163447		2.07851	0.00092634		2.08236	0.00126508		2.07775	0.0014963		2.07746	0.00128678		2.07594	0.000708891		2.07819	0.00219046		2.07759	0.000840092		2.07619	0.00133666		2.08337	0.00112943
2.08935	0.000756744		2.08898	0.00094695		2.08938	0.00107255		2.08611	0.000505584		2.07983	0.000594238		2.08604	0.000734297		2.08746	0.00203384		2.08434	0.00139222		2.08414	0.000862875		2.08611	0.00114149		2.08556	0.00115507		2.08465	0.00130074		2.08032	0.000651713		2.08507	0.00708076		2.08259	0.00014934		2.084	0.00161922		2.08775	0.00125462
2.09435	0.00112197		2.09679	0.000602102		2.09626	0.000826858		2.0908	0.000903288		2.08546	0.000685838		2.09354	0.000958169		2.09277	0.00152454		2.08903	0.00137033		2.09195	0.000477671		2.09111	0.00103661		2.09243	0.00103697		2.09184	0.00148252		2.08719	0.000533462		2.08945	0.00436702		2.08697	0.000433005		2.08963	0.000985799		2.09243	0.000709242
2.09872	0.00116993		2.10304	0.000730927		2.10032	0.000215819		2.09768	0.00245054		2.09327	0.00110171		2.09823	0.000769909		2.1009	0.00204056		2.09652	0.00116773		2.09882	0.000426814		2.09861	0.00118773		2.0965	0.00124639		2.09683	0.00109646		2.09531	0.00129072		2.09476	0.00461313		2.09353	0.00125952		2.09369	0.000588095		2.10025	0.000143038
2.10591	0.00156571		2.1071	0.00097812		2.1047	0.000369591		2.10549	0.00173957		2.10046	0.00190833		2.1026	0.000516466		2.10808	0.00283756		2.10402	0.00140609		2.10289	0.000113901		2.10517	0.00232965		2.10181	0.00147858		2.10121	0.00100641		2.10094	0.0015387		2.10257	0.00369246		2.10165	0.00127145		2.10026	0.00100544		2.10775	0.000330934
2.11372	0.000855561		2.11304	0.00140149		2.11189	0.000770783		2.11111	0.000840635		2.10483	0.00196649		2.10948	0.000570611		2.11183	0.00293105		2.10903	0.00137662		2.10851	0.000542187		2.10986	0.00205599		2.10962	0.0011072		2.10809	0.00126447		2.105	0.00142619		2.10976	0.00611349		2.10728	0.00110401		2.10807	0.00128226		2.11181	0.000916362
2.11872	0.000391001		2.12117	0.000795438		2.11907	0.000785428		2.11517	0.000977352		2.10983	0.000808164		2.11729	0.00102439		2.11621	0.00152971		2.11371	0.00121648		2.11663	0.000942102		2.11486	0.00135714		2.11681	0.00161714		2.11621	0.000991818		2.11125	0.00117062		2.11382	0.00738329		2.11134	0.000278728		2.114	0.00164189		2.11618	0.00111982
2.12216	0.00118307		2.12741	0.00131961		2.12407	0.000547642		2.12143	0.000741053		2.11733	0.000927591		2.12323	0.000847379		2.12371	0.00146436		2.12059	0.000964476		2.12351	0.00136639		2.12236	0.00140863		2.12119	0.00185313		2.12183	0.00220188		2.11938	0.0011159		2.11882	0.00602764		2.11759	0.000234913		2.11806	0.000990332		2.12337	0.000890958
2.12872	0.001052		2.13116	0.00118211		2.12876	0.000375564		2.12955	0.00121365		2.12483	0.00140318		2.12729	0.000559366		2.13059	0.00155424		2.12871	0.000845948		2.12726	0.000584216		2.12986	0.000685611		2.12619	0.000946917		2.12589	0.00164156		2.12563	0.00174958		2.12663	0.00420512		2.12571	0.000424366		2.12432	0.000557571		2.13056	0.000751353
2.13654	0.000249176		2.13617	0.000866459		2.13563	0.00094209		2.13549	0.000534836		2.12952	0.000513654		2.13354	0.00044087		2.13559	0.00134298		2.13403	0.00130684		2.13195	0.00122664		2.13486	0.000908403		2.134	0.000804563		2.13215	0.00148168		2.12969	0.00112984		2.13413	0.0045886		2.13197	0.000755136		2.13275	0.00136507		2.13556	0.00145304
2.14185	0.000696156		2.14398	0.000899011		2.14345	0.000986217		2.13955	0.00127942		2.13421	0.000168706		2.14167	0.000612053		2.14027	0.00203952		2.13809	0.00139352		2.13945	0.00100199		2.13955	0.00114843		2.1415	0.0012544		2.14027	0.000684559		2.13532	9.42737e-06		2.13819	0.00383555		2.13603	0.000699597		2.13869	0.000839228		2.13993	0.00143565
2.14622	0.000912735		2.15054	0.000923868		2.14907	0.00112515		2.14549	0.00100162		2.14202	0.000709414		2.14791	0.000356528		2.14715	0.00214696		2.14496	0.000990913		2.14632	0.000936428		2.14642	0.00157783		2.14556	0.000241896		2.14621	0.00203929		2.14344	0.000580598		2.14226	0.00553869		2.14165	0.00117827		2.14213	0.00145573		2.14681	0.00116971
2.15216	0.000466095		2.15491	0.00132415		2.15313	0.00109567		2.15392	0.00129539		2.14952	0.000507083		2.15198	0.00107146		2.15496	0.00142201		2.15309	0.000177467		2.15101	0.00128591		2.15423	0.00113834		2.14962	0.000441613		2.15027	0.00143207		2.15	0.000750904		2.14944	0.00473577		2.14978	0.00107542		2.14776	0.00220853		2.15462	0.000922083
2.16029	0.000580102		2.15992	0.000902759		2.1597	0.00146834		2.16018	0.00143875		2.15358	0.00119949		2.15792	0.0011406		2.16058	0.00213585		2.1584	0.000668481		2.1557	0.000776083		2.15954	0.00135546		2.15681	0.000483581		2.15652	0.000795872		2.15344	0.000798246		2.15694	0.00570794		2.15634	0.000786815		2.15526	0.00236779		2.16056	0.000544919
2.16654	0.00122779		2.16742	0.00032729		2.16782	0.000580785		2.16361	0.00164828		2.15764	0.00120046		2.16604	0.00102002		2.16465	0.00311855		2.16184	0.00040954		2.16289	0.000994009		2.16392	0.00133528		2.164	0.000533141		2.16496	0.000750013		2.15875	0.00033139		2.16194	0.00568096		2.15978	0.00116346		2.16182	0.00147991		2.16462	9.65795e-05
2.17091	0.00185107		2.17491	0.00140977		2.17376	0.000437034		2.16893	0.00138501		2.16483	0.00121766		2.17229	0.000853418		2.17121	0.00196127		2.16809	0.000480613		2.1707	0.000614058		2.1708	0.00120287		2.169	0.00130923		2.17121	0.00114253		2.16625	0.00080214		2.16632	0.00334824		2.16478	0.00111039		2.16619	0.000659717		2.17087	0.00042225
2.17622	0.00168416		2.1796	0.00134566		2.17751	0.000447825		2.17643	0.00141738		2.17202	0.00047713		2.17604	0.000773865		2.17934	0.00173813		2.17559	0.000980295		2.1757	0.000151308		2.17861	0.00137585		2.17337	0.0011751		2.17464	0.00111209		2.17282	0.000977159		2.17319	0.00701126		2.17259	0.00129038		2.17151	0.000518587		2.179	0.00123105
2.18435	0.00127114		2.18429	0.00115607		2.18407	0.000618554		2.18299	0.00159828		2.17733	0.000424566		2.18104	0		2.18527	0.00250078		2.18153	0.00055212		2.18007	0.000353472		2.18392	0.00106436		2.18025	0.00102326		2.17995	0.000353536		2.17719	0.0011446		2.18101	0.00602928		2.17915	0.00121118		2.17901	0.000871867		2.18493	0.00158349
2.19122	0.000783709		2.19117	0.000755785		2.19251	0.000866168		2.18736	0.00199122		2.18171	0.00112142		2.18885	0.000455864		2.18934	0.00145145		2.18559	0.000428175		2.18695	3.8037e-05		2.18736	0.00108958		2.18837	0.00135816		2.18777	0.000977851		2.1825	0.00101425		2.18663	0.00394675		2.18353	0.001046		2.18651	0.000901785		2.189	0.00213459
2.1956	0.000439471		2.19898	0.00109077		2.19813	0.00110646		2.19236	0.00157526		2.18827	0.00152376		2.19542	0.000425043		2.1959	0.00172805		2.19153	0.00135516		2.19507	3.55154e-05		2.19361	0.00141389		2.194	0.000674019		2.19434	0.00156548		2.19	0.000649458		2.19101	0.00168434		2.18853	0.00138747		2.19119	0.000834695		2.19525	0.000851823
2.2006	0.00100831		2.20429	0.000743948		2.20157	0.000333749		2.20018	0.00167982		2.19639	0.00121379		2.19979	0.000359443		2.20402	0.00190677		2.19965	0.000996763		2.2007	0.00058863		2.20142	0.000776199		2.19806	0.000910643		2.19871	0.000959924		2.19719	0.000916702		2.19726	0.00613394		2.19603	0.00142861		2.19556	0.00095316		2.20337	0.00145831
2.20872	0.00138224		2.20835	0.000806683		2.2072	0.000637438		2.20736	0.00113191		2.20233	0.00102441		2.20479	0.00139758		2.20965	0.0017575		2.20621	0.00189125		2.20476	0.000345697		2.20736	0.00120539		2.20431	0.00113398		2.20402	0.00013612		2.20219	0.00122883		2.20538	0.00214467		2.20353	0.00135476		2.20306	0.00164008		2.20962	0.00114911
2.21591	0.00193999		2.21554	0.000827003		2.21501	0.000277289		2.21205	0.000991252		2.20639	0.00107987		2.21229	0.00149338		2.2134	0.00123606		2.21059	0.000784626		2.21132	0.00108711		2.21142	0.00162932		2.21244	0.000337642		2.21183	0.000303507		2.20657	0.000782055		2.21132	0.00311276		2.20853	0.00124142		2.21087	0.000914478		2.21306	0.00165147
2.21966	0.00111208		2.22366	0.000938861		2.22095	0.000591769		2.21674	0.00156053		2.21233	0.00103813		2.21979	0.000986491		2.21902	0.0022309		2.2159	0.000863067		2.21945	0.000919616		2.21736	0.00176447		2.21869	0.000778412		2.21902	0.000686226		2.21375	0.000485096		2.21538	0.00328691		2.2129	0.000863748		2.21588	0.000763072		2.21837	0.00119168
2.22435	0.00107931		2.22866	0.00115469		2.22532	0.00101107		2.22424	0.00100494		2.22046	0.00101243		2.22448	0.000922558		2.22683	0.00245249		2.22371	0.00140804		2.22507	0.000761793		2.22549	0.000991004		2.22275	0.00103591		2.22371	0.00108916		2.22157	0.000254537		2.22163	0.00170968		2.21978	0.000940269		2.21994	0.000564522		2.22618	0.000994861
2.23154	0.00114006		2.23241	0.00041429		2.23095	7.63076e-05		2.23174	0.000703917		2.22702	0.00122307		2.22916	0.000932137		2.23308	0.00155347		2.2309	0.00152223		2.22882	0.000875484		2.23205	0.00109841		2.22869	0.000414619		2.22839	0.000689353		2.22688	0.000316429		2.22976	0.00365649		2.2279	0.000682523		2.22744	0.000643096		2.23243	0.00146929
2.23872	0.00137917		2.23867	0.00112016		2.23845	0.000292705		2.23674	0.000904533		2.23108	0.00153033		2.23635	0.000726176		2.23746	0.00141504		2.23528	0.00151486		2.23445	0.001205		2.23643	0.00119005		2.23712	0.000673387		2.23558	0.000771483		2.23094	0		2.23601	0.00212505		2.23322	0.000838035		2.23556	0.000819585		2.23712	0.00171097
2.24341	0.00153192		2.24617	0.00138393		2.24563	0.00035167		2.24111	0.00108565		2.23671	0.00105359		2.24416	0.00117475		2.24309	0.00128642		2.23996	0.000839881		2.24226	0.000975515		2.24174	0.000892429		2.24337	0.00114642		2.24339	0.000347699		2.23813	5.06204e-05		2.23975	0.00354447		2.23728	0.00119987		2.24025	0.000944396		2.24212	0.000845644
2.2481	0.00120748					2.25032	0.000581171		2.2483	0.000970713		2.24483	0.000825363		2.24948	0.000787818					2.24778	0.000564255		2.24851	0.000812229		2.24955	0.000733322		2.24681	0.000892717		2.2484	0.000812548		2.24625	0.000557645		2.24507	0.00447821		2.24415	0.00116839		2.24369	0.00119372		2.24962	0.000759134
