# Supplementary material for: Binding and sequestration of poison frog alkaloids by a plasma globulin
Source: eLife journal article supplement (doi:10.7554/elife.85096), 2023-12-14
Supplement: fig5-data1 [file OsABG_mut3_analysis_CompareResultsRawData.xlsx]

## Sheet: Export
NanoTemper Technologies	NanoTemper Technologies
MO.Affinity Analysis v3.0.5	MO.Affinity Analysis v3.0.5
Origin of exported data	Origin of exported data
Project Title:	OsABG_mut3
Comment:
Project File Path:	C:\Users\nanotemper\Desktop\Aurora_MST\20230125_OsABGmut3_PTX\OsABG_mut3_analysis.nta3
Analysis-Set Name:	Analysis-Set #2
Exported from:	Compare Results (Chart)
Exported on:	2023-03-11 17:52:35
Sample Information	Sample Information			Sample Information	Sample Information			Sample Information	Sample Information
Merge-Set Name:	Experiment 7 (#07)			Merge-Set Name:	OsABGm3+PTX (#08)			Merge-Set Name:	OsABGm3+PTX (#09)
Date of Measurement:	2023-03-11 16:53:48.433 → 2023-03-11 17:00:28.263			Date of Measurement:	2023-03-11 17:11:20.972 → 2023-03-11 17:18:00.849			Date of Measurement:	2023-03-11 17:28:45.81 → 2023-03-11 17:35:25.881
Capillary Type:	Monolith Premium Capillary			Capillary Type:	Monolith Premium Capillary			Capillary Type:	Monolith Premium Capillary
Target:	OsABGm3			Target:	OsABGm3			Target:	OsABGm3
TargetConcentration:	5e-09			TargetConcentration:	5e-09			TargetConcentration:	5e-09
Ligand:	MyLigand			Ligand:	PTX			Ligand:	PTX
Measurement Settings	Measurement Settings			Measurement Settings	Measurement Settings			Measurement Settings	Measurement Settings
MST-Power:	Medium			MST-Power:	Medium			MST-Power:	Medium
Excitation-Power:	20			Excitation-Power:	15			Excitation-Power:	15
Excitation type:	Pico - RED			Excitation type:	Pico - RED			Excitation type:	Pico - RED
Thermostat Setpoint:	25			Thermostat Setpoint:	25			Thermostat Setpoint:	25
Analysis Settings	Analysis Settings			Analysis Settings	Analysis Settings			Analysis Settings	Analysis Settings
Type of Analysis:	MST			Type of Analysis:	MST			Type of Analysis:	MST
Evaluation strategy:	On Time			Evaluation strategy:	On Time			Evaluation strategy:	On Time
Cold Region Start:	-1			Cold Region Start:	-1			Cold Region Start:	-1
Cold Region End:	0			Cold Region End:	0			Cold Region End:	0
Hot Region Start:	4			Hot Region Start:	4			Hot Region Start:	4
Hot Region End:	5			Hot Region End:	5			Hot Region End:	5
Fit Results (Kd)	Fit Results (Kd)			Fit Results (Kd)	Fit Results (Kd)			Fit Results (Kd)	Fit Results (Kd)
Fit Model:	Kd			Fit Model:	Kd			Fit Model:	Kd
Bound	934.704			Bound	928.189			Bound	932.755
Unbound	905.785			Unbound	935.797			Unbound	935.418
Kd	2.67452e-07			Kd	0.000926699			Kd	0.00011827
TargetConc	5e-09			TargetConc	5e-09			TargetConc	5e-09
Standard Deviation:	6.90421			Standard Deviation:	0.826941			Standard Deviation:	1.28496
Lower Kd Confidence:	5.22279e-09			Lower Kd Confidence:	0.000342432			Lower Kd Confidence:	5.72865e-06
Upper Kd Confidence:	1.36959e-05			Upper Kd Confidence:	0.00250786			Upper Kd Confidence:	0.00244172
Dose Response Curve	Dose Response Curve	Dose Response Curve		Dose Response Curve	Dose Response Curve	Dose Response Curve		Dose Response Curve	Dose Response Curve	Dose Response Curve
Dose	Response	Err-Values		Dose	Response	Err-Values		Dose	Response	Err-Values
1.52588e-07	923.996	0		1.52588e-07	936.291	0		1.52588e-07	936.029	0
3.05176e-07	901.576	0		3.05176e-07	936.398	0		3.05176e-07	934.81	0
6.10352e-07	936.518	0		6.10352e-07	936.105	0		6.10352e-07	935.807	0
1.2207e-06	932.684	0		1.2207e-06	935.039	0		1.2207e-06	934.525	0
2.44141e-06	933.425	0		2.44141e-06	935.905	0		2.44141e-06	935.957	0
4.88281e-06	935.417	0		4.88281e-06	936.125	0		4.88281e-06	936.657	0
9.76563e-06	936.517	0		9.76563e-06	935.026	0		9.76563e-06	934.294	0
1.95313e-05	935.709	0		1.95313e-05	936.259	0		1.95313e-05	934.486	0
3.90625e-05	935.349	0		3.90625e-05	935.2	0		3.90625e-05	934.117	0
7.8125e-05	935.334	0		7.8125e-05	934.175	0		7.8125e-05	934.702	0
0.00015625	933.055	0		0.00015625	935.136	0		0.00015625	934.389	0
0.0003125	932.723	0		0.0003125	933.509	0		0.0003125	932.189	0
0.000625	935.731	0		0.000625	932.376	0		0.000625	936.309	0
0.00125	930.797	0		0.00125	931.325	0		0.00125	930.972	0
0.0025	932.511	0		0.0025	932.11	0		0.0025	932.546	0
0.005	931.875	0		0.005	928.143	0		0.005	933.12	0

## Sheet: Fit-Values
Dose	Experiment 7 (#07)	FNorm		Dose	OsABGm3+PTX (#08)	FNorm		Dose	OsABGm3+PTX (#09)	FNorm
0.00466516				0.00466516				0.00466516
0.00435275				0.00435275				0.00435275
0.00406126				0.00406126				0.00406126
0.00378929				0.00378929				0.00378929
0.00353553				0.00353553				0.00353553
0.00329877				0.00329877				0.00329877
0.00307786				0.00307786				0.00307786
0.00287175				0.00287175				0.00287175
0.00267943				0.00267943				0.00267943
0.0025				0.0025				0.0025
0.00233258				0.00233258				0.00233258
0.00217638				0.00217638				0.00217638
0.00203063				0.00203063				0.00203063
0.00189465				0.00189465				0.00189465
0.00176777				0.00176777				0.00176777
0.00164938				0.00164938				0.00164938
0.00153893				0.00153893				0.00153893
0.00143587				0.00143587				0.00143587
0.00133972				0.00133972				0.00133972
0.00125				0.00125				0.00125
0.00116629				0.00116629				0.00116629
0.00108819				0.00108819				0.00108819
0.00101532				0.00101532				0.00101532
0.000947323				0.000947323				0.000947323
0.000883883				0.000883883				0.000883883
0.000824692				0.000824692				0.000824692
0.000769465				0.000769465				0.000769465
0.000717936				0.000717936				0.000717936
0.000669858				0.000669858				0.000669858
0.000625				0.000625				0.000625
0.000583146				0.000583146				0.000583146
0.000544094				0.000544094				0.000544094
0.000507658				0.000507658				0.000507658
0.000473661				0.000473661				0.000473661
0.000441942				0.000441942				0.000441942
0.000412346				0.000412346				0.000412346
0.000384733				0.000384733				0.000384733
0.000358968				0.000358968				0.000358968
0.000334929				0.000334929				0.000334929
0.0003125				0.0003125				0.0003125
0.000291573				0.000291573				0.000291573
0.000272047				0.000272047				0.000272047
0.000253829				0.000253829				0.000253829
0.000236831				0.000236831				0.000236831
0.000220971				0.000220971				0.000220971
0.000206173				0.000206173				0.000206173
0.000192366				0.000192366				0.000192366
0.000179484				0.000179484				0.000179484
0.000167465				0.000167465				0.000167465
0.00015625				0.00015625				0.00015625
0.000145786				0.000145786				0.000145786
0.000136024				0.000136024				0.000136024
0.000126914				0.000126914				0.000126914
0.000118415				0.000118415				0.000118415
0.000110485				0.000110485				0.000110485
0.000103087				0.000103087				0.000103087
9.61832e-05				9.61832e-05				9.61832e-05
8.97421e-05				8.97421e-05				8.97421e-05
8.37323e-05				8.37323e-05				8.37323e-05
7.8125e-05				7.8125e-05				7.8125e-05
7.28932e-05				7.28932e-05				7.28932e-05
6.80118e-05				6.80118e-05				6.80118e-05
6.34572e-05				6.34572e-05				6.34572e-05
5.92077e-05				5.92077e-05				5.92077e-05
5.52427e-05				5.52427e-05				5.52427e-05
5.15433e-05				5.15433e-05				5.15433e-05
4.80916e-05				4.80916e-05				4.80916e-05
4.4871e-05				4.4871e-05				4.4871e-05
4.18662e-05				4.18662e-05				4.18662e-05
3.90625e-05				3.90625e-05				3.90625e-05
3.64466e-05				3.64466e-05				3.64466e-05
3.40059e-05				3.40059e-05				3.40059e-05
3.17286e-05				3.17286e-05				3.17286e-05
2.96038e-05				2.96038e-05				2.96038e-05
2.76214e-05				2.76214e-05				2.76214e-05
2.57716e-05				2.57716e-05				2.57716e-05
2.40458e-05				2.40458e-05				2.40458e-05
2.24355e-05				2.24355e-05				2.24355e-05
2.09331e-05				2.09331e-05				2.09331e-05
1.95313e-05				1.95313e-05				1.95313e-05
1.82233e-05				1.82233e-05				1.82233e-05
1.70029e-05				1.70029e-05				1.70029e-05
1.58643e-05				1.58643e-05				1.58643e-05
1.48019e-05				1.48019e-05				1.48019e-05
1.38107e-05				1.38107e-05				1.38107e-05
1.28858e-05				1.28858e-05				1.28858e-05
1.20229e-05				1.20229e-05				1.20229e-05
1.12178e-05				1.12178e-05				1.12178e-05
1.04665e-05				1.04665e-05				1.04665e-05
9.76563e-06				9.76563e-06				9.76563e-06
9.11165e-06				9.11165e-06				9.11165e-06
8.50147e-06				8.50147e-06				8.50147e-06
7.93215e-06				7.93215e-06				7.93215e-06
7.40096e-06				7.40096e-06				7.40096e-06
6.90534e-06				6.90534e-06				6.90534e-06
6.44291e-06				6.44291e-06				6.44291e-06
6.01145e-06				6.01145e-06				6.01145e-06
5.60888e-06				5.60888e-06				5.60888e-06
5.23327e-06				5.23327e-06				5.23327e-06
4.88281e-06				4.88281e-06				4.88281e-06
4.55583e-06				4.55583e-06				4.55583e-06
4.25074e-06				4.25074e-06				4.25074e-06
3.96608e-06				3.96608e-06				3.96608e-06
3.70048e-06				3.70048e-06				3.70048e-06
3.45267e-06				3.45267e-06				3.45267e-06
3.22145e-06				3.22145e-06				3.22145e-06
3.00572e-06				3.00572e-06				3.00572e-06
2.80444e-06				2.80444e-06				2.80444e-06
2.61663e-06				2.61663e-06				2.61663e-06
2.44141e-06				2.44141e-06				2.44141e-06
2.27791e-06				2.27791e-06				2.27791e-06
2.12537e-06				2.12537e-06				2.12537e-06
1.98304e-06				1.98304e-06				1.98304e-06
1.85024e-06				1.85024e-06				1.85024e-06
1.72633e-06				1.72633e-06				1.72633e-06
1.61073e-06				1.61073e-06				1.61073e-06
1.50286e-06				1.50286e-06				1.50286e-06
1.40222e-06				1.40222e-06				1.40222e-06
1.30832e-06				1.30832e-06				1.30832e-06
1.2207e-06				1.2207e-06				1.2207e-06
1.13896e-06				1.13896e-06				1.13896e-06
1.06268e-06				1.06268e-06				1.06268e-06
9.91519e-07				9.91519e-07				9.91519e-07
9.2512e-07				9.2512e-07				9.2512e-07
8.63167e-07				8.63167e-07				8.63167e-07
8.05364e-07				8.05364e-07				8.05364e-07
7.51431e-07				7.51431e-07				7.51431e-07
7.0111e-07				7.0111e-07				7.0111e-07
6.54159e-07				6.54159e-07				6.54159e-07
6.10352e-07				6.10352e-07				6.10352e-07
5.69478e-07				5.69478e-07				5.69478e-07
5.31342e-07				5.31342e-07				5.31342e-07
4.9576e-07				4.9576e-07				4.9576e-07
4.6256e-07				4.6256e-07				4.6256e-07
4.31584e-07				4.31584e-07				4.31584e-07
4.02682e-07				4.02682e-07				4.02682e-07
3.75715e-07				3.75715e-07				3.75715e-07
3.50555e-07				3.50555e-07				3.50555e-07
3.27079e-07				3.27079e-07				3.27079e-07
3.05176e-07				3.05176e-07				3.05176e-07
2.84739e-07				2.84739e-07				2.84739e-07
2.65671e-07				2.65671e-07				2.65671e-07
2.4788e-07				2.4788e-07				2.4788e-07
2.3128e-07				2.3128e-07				2.3128e-07
2.15792e-07				2.15792e-07				2.15792e-07
2.01341e-07				2.01341e-07				2.01341e-07
1.87858e-07				1.87858e-07				1.87858e-07
1.75277e-07				1.75277e-07				1.75277e-07
1.6354e-07				1.6354e-07				1.6354e-07
1.52588e-07				1.52588e-07				1.52588e-07
