# Supplementary material for: Binding and sequestration of poison frog alkaloids by a plasma globulin
Source: eLife journal article supplement (doi:10.7554/elife.85096), 2023-12-14
Supplement: fig5-data1 [file OsABG_mut3_analysis_InitialFluorescenceRawData.xlsx]

## Sheet: RawData
NanoTemper Technologies	NanoTemper Technologies
MO.Affinity Analysis v3.0.5	MO.Affinity Analysis v3.0.5
Origin of exported data	Origin of exported data
Project Title:	OsABG_mut3
Comment:
Project File Path:	C:\Users\nanotemper\Desktop\Aurora_MST\20230125_OsABGmut3_PTX\OsABG_mut3_analysis.nta3
Analysis-Set Name:	Analysis-Set #2
Exported from:	Initial Fluorescence (Raw Data Inspection)
Exported on:	2023-03-11 17:54:02
Sample Information	Sample Information			Sample Information	Sample Information			Sample Information	Sample Information
Merge-Set Name:	Experiment 7 (#07)			Merge-Set Name:	OsABGm3+PTX (#08)			Merge-Set Name:	OsABGm3+PTX (#09)
Run Name:	Experiment 7 (#07)			Run Name:	OsABGm3+PTX (#08)			Run Name:	OsABGm3+PTX (#09)
Date of Measurement:	2023-03-11 16:53:48			Date of Measurement:	2023-03-11 17:11:20			Date of Measurement:	2023-03-11 17:28:45
Capillary Type:	Monolith Premium Capillary			Capillary Type:	Monolith Premium Capillary			Capillary Type:	Monolith Premium Capillary
Capillary Position:	1			Capillary Position:	1			Capillary Position:	1
Ligand:	MyLigand			Ligand:	PTX			Ligand:	PTX
Ligand Concentration:	0.005			Ligand Concentration:	0.005			Ligand Concentration:	0.005
Target:	OsABGm3			Target:	OsABGm3			Target:	OsABGm3
TargetConcentration:	5e-09			TargetConcentration:	5e-09			TargetConcentration:	5e-09
Measurement Settings	Measurement Settings			Measurement Settings	Measurement Settings			Measurement Settings	Measurement Settings
MST-Power:	Medium			MST-Power:	Medium			MST-Power:	Medium
Excitation-Power:	20			Excitation-Power:	15			Excitation-Power:	15
Excitation type:	Pico - RED			Excitation type:	Pico - RED			Excitation type:	Pico - RED
Thermostat Setpoint:	25			Thermostat Setpoint:	25			Thermostat Setpoint:	25
Initial Fluorescence of Cap. Index	Initial Fluorescence of Cap. Index	Initial Fluorescence of Cap. Index		Initial Fluorescence of Cap. Index	Initial Fluorescence of Cap. Index	Initial Fluorescence of Cap. Index		Initial Fluorescence of Cap. Index	Initial Fluorescence of Cap. Index	Initial Fluorescence of Cap. Index
Ligand Concentration	Capillary Index	Initial Fluorescence		Ligand Concentration	Capillary Index	Initial Fluorescence		Ligand Concentration	Capillary Index	Initial Fluorescence
1.52588e-07	16	9854.07		1.52588e-07	16	10715.6		1.52588e-07	16	10872.3
3.05176e-07	15	3506.1		3.05176e-07	15	10441.2		3.05176e-07	15	10808.9
6.10352e-07	14	14293.1		6.10352e-07	14	10581.4		6.10352e-07	14	10666.7
1.2207e-06	13	14150.4		1.2207e-06	13	10455.5		1.2207e-06	13	10648
2.44141e-06	12	13707.2		2.44141e-06	12	10493.4		2.44141e-06	12	10178.8
4.88281e-06	11	14255.2		4.88281e-06	11	10539		4.88281e-06	11	10771.9
9.76563e-06	10	14439.6		9.76563e-06	10	10521.5		9.76563e-06	10	10531
1.95313e-05	9	15084.1		1.95313e-05	9	11591.3		1.95313e-05	9	10416.9
3.90625e-05	8	14301.7		3.90625e-05	8	10875		3.90625e-05	8	10811.8
7.8125e-05	7	14385.1		7.8125e-05	7	10547.3		7.8125e-05	7	11020
0.00015625	6	13990.1		0.00015625	6	10506.4		0.00015625	6	10765.6
0.0003125	5	14068.2		0.0003125	5	10414.7		0.0003125	5	10839.2
0.000625	4	11485.2		0.000625	4	10727.7		0.000625	4	10745.8
0.00125	3	15322.3		0.00125	3	11376.1		0.00125	3	11045.4
0.0025	2	15478.8		0.0025	2	11596.8		0.0025	2	11855.9
0.005	1	17385.5		0.005	1	12965.6		0.005	1	13303.2
