# Supplementary material for: Binding and sequestration of poison frog alkaloids by a plasma globulin
Source: eLife journal article supplement (doi:10.7554/elife.85096), 2023-12-14
Supplement: fig5-data1 [file OsABG_mut3_analysis_MSTTracesRawData.xlsx]

## Sheet: RawData
NanoTemper Technologies	NanoTemper Technologies
MO.Affinity Analysis v3.0.5	MO.Affinity Analysis v3.0.5
Origin of exported data	Origin of exported data
Project Title:	OsABG_mut3
Comment:
Project File Path:	C:\Users\nanotemper\Desktop\Aurora_MST\20230125_OsABGmut3_PTX\OsABG_mut3_analysis.nta3
Analysis-Set Name:	Analysis-Set #2
Exported from:	MST Traces (Raw Data Inspection)
Exported on:	2023-03-11 17:53:20
Sample Information	Sample Information		Sample Information	Sample Information		Sample Information	Sample Information		Sample Information	Sample Information		Sample Information	Sample Information		Sample Information	Sample Information		Sample Information	Sample Information		Sample Information	Sample Information		Sample Information	Sample Information		Sample Information	Sample Information		Sample Information	Sample Information		Sample Information	Sample Information		Sample Information	Sample Information		Sample Information	Sample Information		Sample Information	Sample Information		Sample Information	Sample Information		Sample Information	Sample Information
Merge-Set Name:	Experiment 7 (#07)		Merge-Set Name:	Experiment 7 (#07)		Merge-Set Name:	Experiment 7 (#07)		Merge-Set Name:	Experiment 7 (#07)		Merge-Set Name:	Experiment 7 (#07)		Merge-Set Name:	Experiment 7 (#07)		Merge-Set Name:	Experiment 7 (#07)		Merge-Set Name:	Experiment 7 (#07)		Merge-Set Name:	Experiment 7 (#07)		Merge-Set Name:	Experiment 7 (#07)		Merge-Set Name:	Experiment 7 (#07)		Merge-Set Name:	Experiment 7 (#07)		Merge-Set Name:	Experiment 7 (#07)		Merge-Set Name:	Experiment 7 (#07)		Merge-Set Name:	Experiment 7 (#07)		Merge-Set Name:	Experiment 7 (#07)		Merge-Set Name:	OsABGm3+PTX (#08)
Run Name:	Experiment 7 (#07)		Run Name:	Experiment 7 (#07)		Run Name:	Experiment 7 (#07)		Run Name:	Experiment 7 (#07)		Run Name:	Experiment 7 (#07)		Run Name:	Experiment 7 (#07)		Run Name:	Experiment 7 (#07)		Run Name:	Experiment 7 (#07)		Run Name:	Experiment 7 (#07)		Run Name:	Experiment 7 (#07)		Run Name:	Experiment 7 (#07)		Run Name:	Experiment 7 (#07)		Run Name:	Experiment 7 (#07)		Run Name:	Experiment 7 (#07)		Run Name:	Experiment 7 (#07)		Run Name:	Experiment 7 (#07)		Run Name:	OsABGm3+PTX (#08)
Date of Measurement:	2023-03-11 16:53:48		Date of Measurement:	2023-03-11 16:54:14		Date of Measurement:	2023-03-11 16:54:41		Date of Measurement:	2023-03-11 16:55:08		Date of Measurement:	2023-03-11 16:55:35		Date of Measurement:	2023-03-11 16:56:01		Date of Measurement:	2023-03-11 16:56:28		Date of Measurement:	2023-03-11 16:56:54		Date of Measurement:	2023-03-11 16:57:21		Date of Measurement:	2023-03-11 16:57:48		Date of Measurement:	2023-03-11 16:58:15		Date of Measurement:	2023-03-11 16:58:41		Date of Measurement:	2023-03-11 16:59:08		Date of Measurement:	2023-03-11 16:59:34		Date of Measurement:	2023-03-11 17:00:01		Date of Measurement:	2023-03-11 17:00:28		Date of Measurement:	2023-03-11 17:11:20
Capillary Type:	Monolith Premium Capillary		Capillary Type:	Monolith Premium Capillary		Capillary Type:	Monolith Premium Capillary		Capillary Type:	Monolith Premium Capillary		Capillary Type:	Monolith Premium Capillary		Capillary Type:	Monolith Premium Capillary		Capillary Type:	Monolith Premium Capillary		Capillary Type:	Monolith Premium Capillary		Capillary Type:	Monolith Premium Capillary		Capillary Type:	Monolith Premium Capillary		Capillary Type:	Monolith Premium Capillary		Capillary Type:	Monolith Premium Capillary		Capillary Type:	Monolith Premium Capillary		Capillary Type:	Monolith Premium Capillary		Capillary Type:	Monolith Premium Capillary		Capillary Type:	Monolith Premium Capillary		Capillary Type:	Monolith Premium Capillary
Capillary Position:	1		Capillary Position:	9		Capillary Position:	2		Capillary Position:	10		Capillary Position:	3		Capillary Position:	11		Capillary Position:	4		Capillary Position:	12		Capillary Position:	5		Capillary Position:	13		Capillary Position:	6		Capillary Position:	14		Capillary Position:	7		Capillary Position:	15		Capillary Position:	8		Capillary Position:	16		Capillary Position:	1
Ligand:	MyLigand		Ligand:	MyLigand		Ligand:	MyLigand		Ligand:	MyLigand		Ligand:	MyLigand		Ligand:	MyLigand		Ligand:	MyLigand		Ligand:	MyLigand		Ligand:	MyLigand		Ligand:	MyLigand		Ligand:	MyLigand		Ligand:	MyLigand		Ligand:	MyLigand		Ligand:	MyLigand		Ligand:	MyLigand		Ligand:	MyLigand		Ligand:	PTX
Ligand Concentration:	0.005		Ligand Concentration:	1.95313e-05		Ligand Concentration:	0.0025		Ligand Concentration:	9.76563e-06		Ligand Concentration:	0.00125		Ligand Concentration:	4.88281e-06		Ligand Concentration:	0.000625		Ligand Concentration:	2.44141e-06		Ligand Concentration:	0.0003125		Ligand Concentration:	1.2207e-06		Ligand Concentration:	0.00015625		Ligand Concentration:	6.10352e-07		Ligand Concentration:	7.8125e-05		Ligand Concentration:	3.05176e-07		Ligand Concentration:	3.90625e-05		Ligand Concentration:	1.52588e-07		Ligand Concentration:	0.005
Target:	OsABGm3		Target:	OsABGm3		Target:	OsABGm3		Target:	OsABGm3		Target:	OsABGm3		Target:	OsABGm3		Target:	OsABGm3		Target:	OsABGm3		Target:	OsABGm3		Target:	OsABGm3		Target:	OsABGm3		Target:	OsABGm3		Target:	OsABGm3		Target:	OsABGm3		Target:	OsABGm3		Target:	OsABGm3		Target:	OsABGm3
TargetConcentration:	5e-09		TargetConcentration:	5e-09		TargetConcentration:	5e-09		TargetConcentration:	5e-09		TargetConcentration:	5e-09		TargetConcentration:	5e-09		TargetConcentration:	5e-09		TargetConcentration:	5e-09		TargetConcentration:	5e-09		TargetConcentration:	5e-09		TargetConcentration:	5e-09		TargetConcentration:	5e-09		TargetConcentration:	5e-09		TargetConcentration:	5e-09		TargetConcentration:	5e-09		TargetConcentration:	5e-09		TargetConcentration:	5e-09
Measurement Settings	Measurement Settings		Measurement Settings	Measurement Settings		Measurement Settings	Measurement Settings		Measurement Settings	Measurement Settings		Measurement Settings	Measurement Settings		Measurement Settings	Measurement Settings		Measurement Settings	Measurement Settings		Measurement Settings	Measurement Settings		Measurement Settings	Measurement Settings		Measurement Settings	Measurement Settings		Measurement Settings	Measurement Settings		Measurement Settings	Measurement Settings		Measurement Settings	Measurement Settings		Measurement Settings	Measurement Settings		Measurement Settings	Measurement Settings		Measurement Settings	Measurement Settings		Measurement Settings	Measurement Settings
MST-Power:	Medium		MST-Power:	Medium		MST-Power:	Medium		MST-Power:	Medium		MST-Power:	Medium		MST-Power:	Medium		MST-Power:	Medium		MST-Power:	Medium		MST-Power:	Medium		MST-Power:	Medium		MST-Power:	Medium		MST-Power:	Medium		MST-Power:	Medium		MST-Power:	Medium		MST-Power:	Medium		MST-Power:	Medium		MST-Power:	Medium
Excitation-Power:	20		Excitation-Power:	20		Excitation-Power:	20		Excitation-Power:	20		Excitation-Power:	20		Excitation-Power:	20		Excitation-Power:	20		Excitation-Power:	20		Excitation-Power:	20		Excitation-Power:	20		Excitation-Power:	20		Excitation-Power:	20		Excitation-Power:	20		Excitation-Power:	20		Excitation-Power:	20		Excitation-Power:	20		Excitation-Power:	15
Excitation type:	Pico - RED		Excitation type:	Pico - RED		Excitation type:	Pico - RED		Excitation type:	Pico - RED		Excitation type:	Pico - RED		Excitation type:	Pico - RED		Excitation type:	Pico - RED		Excitation type:	Pico - RED		Excitation type:	Pico - RED		Excitation type:	Pico - RED		Excitation type:	Pico - RED		Excitation type:	Pico - RED		Excitation type:	Pico - RED		Excitation type:	Pico - RED		Excitation type:	Pico - RED		Excitation type:	Pico - RED		Excitation type:	Pico - RED
Thermostat Setpoint:	25		Thermostat Setpoint:	25		Thermostat Setpoint:	25		Thermostat Setpoint:	25		Thermostat Setpoint:	25		Thermostat Setpoint:	25		Thermostat Setpoint:	25		Thermostat Setpoint:	25		Thermostat Setpoint:	25		Thermostat Setpoint:	25		Thermostat Setpoint:	25		Thermostat Setpoint:	25		Thermostat Setpoint:	25		Thermostat Setpoint:	25		Thermostat Setpoint:	25		Thermostat Setpoint:	25		Thermostat Setpoint:	25
Included	Included		Included	Included		Included	Included		Included	Included		Included	Included		Included	Included		Included	Included		Included	Included		Included	Included		Included	Included		Included	Included		Included	Included		Included	Included		Included	Included		Included	Included		Included	Included		Included	Included
Time [s]	Normalized Fluorescence [-]		Time [s]	Normalized Fluorescence [-]		Time [s]	Normalized Fluorescence [-]		Time [s]	Normalized Fluorescence [-]		Time [s]	Normalized Fluorescence [-]		Time [s]	Normalized Fluorescence [-]		Time [s]	Normalized Fluorescence [-]		Time [s]	Normalized Fluorescence [-]		Time [s]	Normalized Fluorescence [-]		Time [s]	Normalized Fluorescence [-]		Time [s]	Normalized Fluorescence [-]		Time [s]	Normalized Fluorescence [-]		Time [s]	Normalized Fluorescence [-]		Time [s]	Normalized Fluorescence [-]		Time [s]	Normalized Fluorescence [-]		Time [s]	Normalized Fluorescence [-]		Time [s]	Normalized Fluorescence [-]
-2.9501	0.999509		-2.9502	1.00147		-2.9502	0.99833		-2.9501	0.998633		-2.9501	0.999421		-2.9502	0.999055		-2.9502	0.99999		-2.9501	1.00291		-2.9501	0.997893		-2.9502	0.999754		-2.9502	0.996616		-2.9501	1.0002		-2.9501	1.00161		-2.9502	0.999758		-2.9502	1.00034		-2.9501	1.00207		-2.9502	0.997778
-2.9001	0.998627		-2.9002	0.998005		-2.9002	1.00047		-2.9001	1.00023		-2.9001	1.00003		-2.9002	0.999254		-2.9002	0.999539		-2.9001	1.00001		-2.9001	0.998027		-2.9002	0.999543		-2.9002	0.998036		-2.9001	1.00184		-2.9001	1.00007		-2.9002	0.996672		-2.9002	1.00159		-2.9001	1.00072		-2.9002	1.0009
-2.8501	0.999911		-2.8502	0.999105		-2.8502	0.997573		-2.8501	0.997246		-2.8501	1.0009		-2.8502	1.00107		-2.8502	0.999227		-2.8501	1.00182		-2.8501	1.00164		-2.8502	1.00083		-2.8502	1.00299		-2.8501	0.998443		-2.8501	0.999924		-2.8502	0.999248		-2.8502	0.998068		-2.8501	1.00015		-2.8502	0.998158
-2.8001	0.999338		-2.8002	1.00207		-2.8002	1.00161		-2.8001	1.0019		-2.8001	0.997786		-2.8002	0.999636		-2.8002	0.997932		-2.8001	0.997266		-2.8001	0.999052		-2.8002	0.999552		-2.8002	1.00236		-2.8001	0.997468		-2.8001	1.00266		-2.8002	1.0008		-2.8002	0.999031		-2.8001	1.0012		-2.8002	0.997933
-2.7501	0.999623		-2.7502	1.00145		-2.7502	1.00235		-2.7501	0.999738		-2.7501	1.0003		-2.7502	0.998432		-2.7502	0.998573		-2.7501	1.00146		-2.7501	1.0012		-2.7502	1.00132		-2.7502	0.999559		-2.7501	0.99941		-2.7501	0.999224		-2.7502	1.00172		-2.7502	0.999341		-2.7501	0.99837		-2.7502	0.998659
-2.7001	0.998466		-2.7002	1.00027		-2.7002	1.00124		-2.7001	0.998467		-2.7001	0.999469		-2.7002	1.00156		-2.7002	1.00201		-2.7001	0.999913		-2.7001	1.0001		-2.7002	1		-2.7002	0.998221		-2.7001	0.998114		-2.7001	1.00005		-2.7002	1.00073		-2.7002	1.00092		-2.7001	0.998912		-2.7002	1.00049
-2.6501	0.998978		-2.6502	1.00192		-2.6502	0.99842		-2.6501	0.99979		-2.6501	1.00171		-2.6502	0.999769		-2.6502	0.997266		-2.6501	0.998619		-2.6501	0.998673		-2.6502	0.997463		-2.6502	1.00285		-2.6501	1.00046		-2.6501	0.999138		-2.6502	1.00079		-2.6502	1.00111		-2.6501	0.997359		-2.6502	0.999072
-2.6001	0.999909		-2.6002	1.00076		-2.6002	1.00128		-2.6001	0.99944		-2.6001	1.00141		-2.6002	1.00133		-2.6002	1.00015		-2.6001	1.00063		-2.6001	0.998513		-2.6002	1.00101		-2.6002	1.00082		-2.6001	1.00055		-2.6001	1.00313		-2.6002	0.995787		-2.6002	1.00098		-2.6001	0.999616		-2.6002	1.00016
-2.5501	1.00047		-2.5502	0.99988		-2.5502	0.998575		-2.5501	0.99939		-2.5501	0.997823		-2.5502	0.995912		-2.5502	0.998785		-2.5501	1.00114		-2.5501	1.00059		-2.5502	1.00129		-2.5502	1.00091		-2.5501	0.997839		-2.5501	1.00016		-2.5502	1.00033		-2.5502	0.998719		-2.5501	0.999735		-2.5502	0.998993
-2.5001	0.999795		-2.5001	1.00136		-2.5002	1.00142		-2.5001	0.999658		-2.5001	0.998796		-2.5002	1.00128		-2.5002	0.999202		-2.5001	0.99712		-2.5001	0.999075		-2.5002	0.997411		-2.5002	0.998199		-2.5001	1.00178		-2.5001	0.997872		-2.5002	0.998632		-2.5002	0.998327		-2.5001	0.999818		-2.5002	1.00209
-2.4501	1.00163		-2.4501	1.00024		-2.4502	0.998987		-2.4501	0.999094		-2.4501	0.999264		-2.4502	0.999284		-2.4502	0.999834		-2.4501	1.00038		-2.4501	0.999952		-2.4502	0.998271		-2.4502	1.00005		-2.4501	0.998637		-2.4501	0.999191		-2.4502	1.00244		-2.4502	1.00063		-2.4501	1.00066		-2.4501	0.998719
-2.4001	0.996942		-2.4001	0.997042		-2.4002	0.997129		-2.4001	1.00134		-2.4001	1.00037		-2.4001	1.00082		-2.4002	0.999761		-2.4001	1.00206		-2.4001	0.997893		-2.4002	1.00182		-2.4002	0.998463		-2.4001	0.998171		-2.4001	0.998681		-2.4002	1.00122		-2.4002	0.998631		-2.4001	0.997448		-2.4001	0.998696
-2.3501	1.00275		-2.3501	0.998232		-2.3501	1.00069		-2.3501	0.999734		-2.3501	1.00071		-2.3501	0.999119		-2.3502	1.00217		-2.3501	1.00265		-2.3501	1.00182		-2.3502	1.00145		-2.3502	0.999675		-2.3501	0.999789		-2.3501	1.00014		-2.3502	1.00484		-2.3502	1.00289		-2.3501	0.999579		-2.3501	0.999374
-2.3001	0.999816		-2.3001	0.998638		-2.3001	0.997693		-2.3001	0.997744		-2.3001	1.0023		-2.3001	0.997574		-2.3002	0.998445		-2.3001	0.998369		-2.3001	1.00203		-2.3001	0.998642		-2.3002	0.999968		-2.3001	0.997204		-2.3001	1.00012		-2.3002	1.00126		-2.3002	1.0004		-2.3001	1.00144		-2.3001	1.00166
-2.2501	0.99898		-2.2501	0.998522		-2.2501	1.00184		-2.2501	1.00207		-2.2501	0.999426		-2.2501	0.997315		-2.2501	1.00057		-2.2501	0.998522		-2.2501	0.998633		-2.2501	1.00244		-2.2502	1.00068		-2.2501	0.998504		-2.2501	0.998478		-2.2502	0.993024		-2.2502	0.996306		-2.2501	0.997234		-2.2501	0.999141
-2.2001	0.998488		-2.2001	1.00079		-2.2001	1.0004		-2.2001	0.999472		-2.2001	0.999269		-2.2001	0.99805		-2.2001	1.00063		-2.2001	1.00033		-2.2001	0.999285		-2.2001	0.998505		-2.2002	0.998713		-2.2001	1.00086		-2.2001	1.00273		-2.2001	1.00263		-2.2002	1.00105		-2.2001	0.996733		-2.2001	0.998696
-2.1501	0.998932		-2.1501	1.00014		-2.1501	0.999885		-2.1501	0.999003		-2.1501	0.996568		-2.1501	0.997506		-2.1501	1.00122		-2.1501	0.999002		-2.1501	0.99981		-2.1501	0.998886		-2.1502	0.996465		-2.1501	0.999911		-2.1501	0.996166		-2.1501	1.00409		-2.1502	0.999556		-2.1501	0.999528		-2.1501	0.997773
-2.1001	0.999575		-2.1001	1.00077		-2.1001	0.996195		-2.1001	1.00019		-2.1001	0.999418		-2.1001	0.999067		-2.1001	1.00052		-2.1001	0.99983		-2.1001	0.997775		-2.1001	1.00064		-2.1001	0.996211		-2.1001	0.99846		-2.1001	0.998109		-2.1001	0.992753		-2.1002	0.999934		-2.1001	0.998338		-2.1001	1.00018
-2.0501	1.00089		-2.0501	0.999469		-2.0501	0.998731		-2.0501	0.998561		-2.0501	1.00194		-2.0501	1.00115		-2.0501	0.997512		-2.0501	0.998911		-2.0501	1.00157		-2.0501	0.998581		-2.0501	1.00085		-2.0501	1.00309		-2.0501	0.99953		-2.0501	1.0002		-2.0502	0.99818		-2.0501	0.998632		-2.0501	0.998482
-2.0001	0.99739		-2.0001	0.998435		-2.0001	0.999849		-2.0001	1.00151		-2.0001	0.999099		-2.0001	1.00003		-2.0001	1.00207		-2.0001	0.998272		-2.0001	0.999847		-2.0001	0.999228		-2.0001	0.997077		-2.0001	0.999516		-2.0001	0.997906		-2.0001	0.997701		-2.0001	0.999182		-2.0001	1.00224		-2.0001	1.00026
-1.9501	0.995636		-1.9501	0.998558		-1.9501	1.00085		-1.9501	0.996882		-1.9501	0.998833		-1.9501	1.00112		-1.9501	0.999782		-1.9501	1.00148		-1.9501	1.00167		-1.9501	0.998064		-1.9501	0.999481		-1.9501	0.999267		-1.9501	1.0002		-1.9501	1.00036		-1.9501	0.999927		-1.9501	0.997228		-1.9501	0.996526
-1.9001	0.998899		-1.9001	0.998611		-1.9001	1.00274		-1.9001	0.997263		-1.9001	0.998931		-1.9001	1.00019		-1.9001	1.001		-1.9001	0.997974		-1.9001	1.00124		-1.9001	1.00084		-1.9001	1.00048		-1.9001	0.99803		-1.9001	0.998586		-1.9001	1.00307		-1.9001	0.998268		-1.9001	1.00049		-1.9001	0.998355
-1.8501	0.996993		-1.8501	0.997322		-1.8501	0.998444		-1.8501	0.999505		-1.8501	0.999537		-1.8501	1.00075		-1.8501	1.00183		-1.8501	0.99865		-1.8501	1.00149		-1.8501	0.998649		-1.8501	1.00124		-1.8501	0.99983		-1.8501	0.999535		-1.8501	1.0019		-1.8501	1.00091		-1.8501	1.00096		-1.8501	0.996877
-1.8001	0.99886		-1.8001	0.996074		-1.8001	0.999978		-1.8001	1.00267		-1.8001	0.997913		-1.8001	0.999586		-1.8001	0.999222		-1.8001	1.00008		-1.8001	0.998385		-1.8001	0.997841		-1.8001	1.00236		-1.8001	0.9983		-1.8001	0.998348		-1.8001	1.00149		-1.8001	0.998808		-1.8001	1.00141		-1.8001	0.9965
-1.7501	0.997013		-1.7501	0.99946		-1.7501	1.00255		-1.7501	0.999727		-1.7501	1.00112		-1.7501	1.00078		-1.7501	0.998782		-1.7501	0.998979		-1.7501	1.00051		-1.7501	1.00021		-1.7501	0.99895		-1.7501	1.00129		-1.7501	0.997383		-1.7501	0.999566		-1.7501	1.00209		-1.7501	1.00309		-1.7501	1.00071
-1.7001	0.997926		-1.7001	0.996913		-1.7001	0.999723		-1.7001	0.99895		-1.7001	1.00049		-1.7001	0.999912		-1.7001	0.998384		-1.7001	0.999005		-1.7001	0.999255		-1.7001	0.998854		-1.7001	1.00133		-1.7001	0.998102		-1.7001	0.998592		-1.7001	0.995174		-1.7001	1.00065		-1.7001	1.00169		-1.7001	1.00272
-1.6501	0.998816		-1.6501	0.997518		-1.6501	1.00134		-1.6501	0.999198		-1.6501	1.00153		-1.6501	0.995231		-1.6501	0.998557		-1.6501	0.998507		-1.6501	1.00122		-1.6501	1.00014		-1.6501	1.00216		-1.6501	1.00092		-1.6501	0.997057		-1.6501	1.0052		-1.6501	0.996453		-1.6501	1.00117		-1.6501	1.00265
-1.6001	0.99738		-1.6001	1.0024		-1.6001	0.998574		-1.6001	0.998145		-1.6001	0.998682		-1.6001	0.997822		-1.6001	0.998186		-1.6001	0.998135		-1.6001	0.99888		-1.6001	1.00088		-1.6001	0.997003		-1.6001	0.996682		-1.6001	1.00034		-1.6001	1.00291		-1.6001	0.997987		-1.6001	0.998365		-1.6001	1.0007
-1.5501	1.00114		-1.5501	1.00028		-1.5501	1.00034		-1.55	1.001		-1.5501	1.00168		-1.5501	0.999869		-1.5501	0.999586		-1.5501	0.998937		-1.5501	1.00032		-1.5501	0.998921		-1.5501	0.998938		-1.5501	0.998559		-1.5501	0.997346		-1.5501	1.00177		-1.5501	0.996336		-1.5501	0.997374		-1.5501	0.9977
-1.5001	0.998523		-1.5001	0.997973		-1.5001	0.996832		-1.5	0.998719		-1.5001	0.999285		-1.5001	1.00084		-1.5001	0.997415		-1.5001	0.999386		-1.5001	1.00092		-1.5001	1.0013		-1.5001	0.99755		-1.5001	0.997773		-1.5001	0.998643		-1.5001	0.995127		-1.5001	0.996517		-1.5001	0.999215		-1.5001	0.99584
-1.45	0.998915		-1.4501	0.998735		-1.4501	0.998084		-1.45	0.999426		-1.4501	0.99851		-1.4501	0.996873		-1.4501	0.996087		-1.45	0.997448		-1.4501	1.00023		-1.4501	1.00009		-1.4501	0.998615		-1.4501	1.0003		-1.4501	1.00115		-1.4501	0.997925		-1.4501	0.997827		-1.4501	0.999576		-1.4501	0.999719
-1.4	0.998041		-1.4001	0.996238		-1.4001	0.997624		-1.4	1.00012		-1.4	0.998242		-1.4001	1.00178		-1.4001	0.999266		-1.4	1.00003		-1.4001	0.999601		-1.4001	0.998059		-1.4001	1.00044		-1.4001	0.999649		-1.4001	0.998936		-1.4001	0.993462		-1.4001	0.998335		-1.4001	0.997127		-1.4001	0.998463
-1.35	0.996893		-1.3501	0.999325		-1.3501	0.999264		-1.35	0.997898		-1.35	0.99874		-1.3501	0.997939		-1.3501	0.998751		-1.35	0.997842		-1.3501	0.996879		-1.3501	1.00119		-1.3501	0.998992		-1.35	0.996339		-1.3501	0.997442		-1.3501	0.995342		-1.3501	1.00156		-1.3501	0.997101		-1.3501	0.99676
-1.3	0.998787		-1.3001	0.996385		-1.3001	0.999743		-1.3	1.00064		-1.3	1.00089		-1.3001	0.999504		-1.3001	0.998905		-1.3	1.00124		-1.3	0.998548		-1.3001	0.999563		-1.3001	1.00011		-1.3	0.997128		-1.3001	0.997044		-1.3001	0.998577		-1.3001	0.998966		-1.3001	0.99925		-1.3001	1.0014
-1.25	0.999008		-1.2501	0.998871		-1.2501	0.999574		-1.25	1.00013		-1.25	0.998991		-1.2501	0.998015		-1.2501	0.997259		-1.25	0.995365		-1.25	0.998208		-1.2501	1.0017		-1.2501	0.999521		-1.25	0.998788		-1.2501	1.00288		-1.2501	1.00061		-1.2501	0.996008		-1.25	1.001		-1.2501	0.999121
-1.2	0.998		-1.2001	0.996191		-1.2001	0.998393		-1.2	0.999222		-1.2	1.00033		-1.2001	0.99926		-1.2001	1.00209		-1.2	0.998032		-1.2	0.997996		-1.2001	1.00065		-1.2001	0.996358		-1.2	1.00224		-1.2	0.996498		-1.2001	1.0008		-1.2001	1.00122		-1.2	1.00132		-1.2001	1.00199
-1.15	0.997137		-1.1501	1.00008		-1.1501	1.00156		-1.15	1.00179		-1.15	0.998334		-1.1501	0.998217		-1.1501	1.0029		-1.15	0.997485		-1.15	0.999591		-1.1501	0.999207		-1.1501	0.997391		-1.15	0.99652		-1.15	1.0011		-1.1501	0.997253		-1.1501	0.999681		-1.15	1.00136		-1.1501	0.997926
-1.1	0.997163		-1.1001	0.997173		-1.1001	1.00076		-1.1	0.998617		-1.1	1.00104		-1.1001	0.996675		-1.1001	1.00134		-1.1	0.997306		-1.1	0.998759		-1.1001	0.999338		-1.1001	0.997682		-1.1	0.996242		-1.1	1.00078		-1.1001	0.992576		-1.1001	1.00209		-1.1	1.00205		-1.1001	0.996708
-1.05	0.997623		-1.0501	0.99845		-1.0501	0.997628		-1.05	0.999799		-1.05	1.00085		-1.0501	0.998054		-1.0501	1.00127		-1.05	0.99515		-1.05	0.996444		-1.0501	0.998424		-1.0501	0.996539		-1.05	0.995318		-1.05	1.00049		-1.0501	1.00047		-1.0501	0.998373		-1.05	0.998502		-1.0501	1.00193
-1	0.997405		-1.0001	0.998577		-1.0001	0.998715		-1	0.999583		-1	0.995784		-1.0001	0.99776		-1.0001	0.996288		-1	0.999857		-1	0.996773		-1.0001	0.998583		-1.0001	0.997296		-1	0.997195		-1	0.999384		-1.0001	0.995511		-1.0001	0.999022		-1	1.00003		-1.0001	0.99842
-0.95	0.99587		-0.9501	0.997568		-0.9501	1.00243		-0.95	0.998305		-0.95	0.998589		-0.9501	0.995415		-0.9501	0.999987		-0.95	0.997243		-0.95	0.997369		-0.9501	0.997163		-0.9501	0.997188		-0.95	1.00024		-0.95	0.99911		-0.9501	1.00012		-0.9501	0.998548		-0.95	0.997762		-0.9501	1.00044
-0.9	0.995998		-0.9001	1.00251		-0.9001	0.9981		-0.9	0.99922		-0.9	0.998981		-0.9001	0.997986		-0.9001	1.00029		-0.9	0.997875		-0.9	0.998896		-0.9001	0.997869		-0.9001	0.994876		-0.9	0.997686		-0.9	0.998536		-0.9001	0.995663		-0.9001	0.997892		-0.9	0.997531		-0.9001	0.997783
-0.85	0.99921		-0.8501	0.998394		-0.8501	0.998472		-0.85	0.999082		-0.85	0.996629		-0.8501	0.999734		-0.8501	0.999506		-0.85	0.996552		-0.85	0.998764		-0.8501	0.999441		-0.8501	0.998732		-0.85	0.998359		-0.85	0.998624		-0.8501	0.998389		-0.8501	1.00045		-0.85	0.998629		-0.8501	0.999111
-0.8	0.999005		-0.8001	1.00095		-0.8001	0.997067		-0.8	0.99711		-0.8	0.999386		-0.8001	0.998107		-0.8001	1.00089		-0.8	0.998136		-0.8	0.997623		-0.8001	0.999155		-0.8001	1.0002		-0.8	0.996702		-0.8	0.996774		-0.8001	0.998628		-0.8001	0.999454		-0.8	0.999168		-0.8001	0.997085
-0.75	0.99896		-0.7501	1.00121		-0.7501	1.00126		-0.75	0.999244		-0.75	1.00119		-0.7501	0.999894		-0.7501	0.999422		-0.75	1.00002		-0.75	0.998809		-0.7501	1.00058		-0.7501	0.99743		-0.75	0.997846		-0.75	0.999675		-0.7501	1.00035		-0.7501	0.99915		-0.75	0.999676		-0.7501	0.999305
-0.7	0.996458		-0.7	0.99943		-0.7001	1.00119		-0.7	0.99704		-0.7	1.00103		-0.7001	0.997714		-0.7001	0.999288		-0.7	0.997805		-0.7	0.996881		-0.7001	0.998442		-0.7001	0.998853		-0.7	0.994941		-0.7	0.997964		-0.7001	0.998571		-0.7001	0.995543		-0.7	1.00046		-0.7001	0.997575
-0.65	0.996802		-0.65	0.998348		-0.6501	0.997334		-0.65	0.997578		-0.65	0.999038		-0.6501	0.99686		-0.6501	1.00218		-0.65	1.00189		-0.65	0.997836		-0.6501	1.001		-0.6501	0.998671		-0.65	0.998035		-0.65	0.998527		-0.6501	0.99967		-0.6501	0.996601		-0.65	0.996716		-0.65	0.999308
-0.6	0.995975		-0.6	1.00008		-0.6001	0.998788		-0.6	0.998395		-0.6	0.997267		-0.6	0.997919		-0.6001	0.996613		-0.6	0.999686		-0.6	1.00248		-0.6001	0.999622		-0.6001	0.996588		-0.6	0.998776		-0.6	0.99897		-0.6001	0.99578		-0.6001	0.997389		-0.6	0.999741		-0.6	0.998218
-0.55	0.997518		-0.55	0.996816		-0.5501	0.995949		-0.55	0.9976		-0.55	0.998496		-0.55	0.999562		-0.5501	0.996836		-0.55	1.00023		-0.55	0.998758		-0.5501	1.00122		-0.5501	0.997939		-0.55	0.999164		-0.55	0.998742		-0.5501	0.993691		-0.5501	0.99904		-0.55	0.998914		-0.55	0.997987
-0.5	0.9975		-0.5	0.997113		-0.5	0.999492		-0.5	0.998318		-0.5	0.99974		-0.5	0.998144		-0.5001	0.995279		-0.5	0.997594		-0.5	0.998398		-0.5001	0.999244		-0.5001	0.999956		-0.5	0.997647		-0.5	0.998702		-0.5001	0.999872		-0.5001	0.998064		-0.5	0.99912		-0.5	0.996126
-0.45	0.999586		-0.45	0.996964		-0.45	0.998098		-0.45	0.996945		-0.45	1.00181		-0.45	0.99762		-0.45	1.00008		-0.45	0.998361		-0.45	1.00037		-0.45	1.00044		-0.4501	1.00138		-0.45	0.996415		-0.45	1.00026		-0.4501	1.00162		-0.4501	1.00138		-0.45	1.00145		-0.45	1.00049
-0.4	0.995926		-0.4	0.999318		-0.4	0.999527		-0.4	1.00035		-0.4	0.999948		-0.4	0.997661		-0.4	0.998805		-0.4	0.999831		-0.4	0.997927		-0.4	1.00033		-0.4001	0.998856		-0.4	0.997595		-0.4	0.997056		-0.4	0.999036		-0.4001	0.997688		-0.4	0.995772		-0.4	0.996153
-0.35	0.999487		-0.35	0.997899		-0.35	0.999056		-0.35	0.997183		-0.35	0.99637		-0.35	0.997085		-0.35	0.997574		-0.35	1.00049		-0.35	0.998949		-0.35	1.00013		-0.3501	1.00009		-0.35	1.00019		-0.35	0.998228		-0.35	0.99848		-0.3501	0.997163		-0.35	1.00125		-0.35	0.995529
-0.3	0.994367		-0.3	0.998029		-0.3	1.00088		-0.3	0.997103		-0.3	0.99984		-0.3	0.999097		-0.3	0.999436		-0.3	1.00061		-0.3	0.999932		-0.3	0.998865		-0.3001	0.995652		-0.3	0.994927		-0.3	0.99698		-0.3	1.00255		-0.3001	0.997771		-0.3	0.998841		-0.3	0.999844
-0.25	0.995757		-0.25	0.996345		-0.25	1.00046		-0.25	0.997497		-0.25	1.00012		-0.25	0.997306		-0.25	0.993287		-0.25	0.998005		-0.25	0.996633		-0.25	1.00084		-0.25	0.998119		-0.25	0.999744		-0.25	0.997192		-0.25	0.997638		-0.2501	0.999872		-0.25	0.993606		-0.25	0.993059
-0.2	0.994947		-0.2	1.00032		-0.2	1.00078		-0.2	0.99744		-0.2	1.00097		-0.2	0.995181		-0.2	0.998747		-0.2	0.999294		-0.2	0.996551		-0.2	0.99674		-0.2	0.997856		-0.2	0.995259		-0.2	0.99814		-0.2	1.00015		-0.2	1.00068		-0.2	0.998125		-0.2	0.99821
-0.15	0.995851		-0.15	0.99982		-0.15	1.00037		-0.15	0.994788		-0.15	0.997424		-0.15	0.998085		-0.15	0.99764		-0.15	1.0011		-0.15	0.997348		-0.15	0.997593		-0.15	0.998765		-0.15	0.997536		-0.15	0.998321		-0.15	0.998462		-0.15	0.998257		-0.15	0.997953		-0.15	0.996487
-0.0999999	0.997405		-0.0999999	0.996157		-0.0999999	0.997134		-0.0999999	0.998317		-0.0999999	0.999941		-0.0999999	1.00018		-0.0999999	0.999163		-0.0999999	1.00039		-0.0999999	1.00207		-0.0999999	0.998837		-0.0999999	0.997071		-0.0999999	0.997318		-0.0999999	1.00016		-0.0999999	0.998964		-0.0999999	0.997774		-0.0999999	0.996992		-0.0999999	0.993558
-0.05	0.994471		-0.05	0.997109		-0.05	0.99779		-0.05	0.997482		-0.05	0.998116		-0.05	0.9957		-0.05	0.99953		-0.05	0.997766		-0.05	0.999269		-0.05	0.997928		-0.05	0.99755		-0.05	0.995385		-0.05	0.996809		-0.05	1.0012		-0.05	1.00002		-0.05	1.00151		-0.05	0.996159
0	0.99539		0	0.998752		0	0.998308		0	1.00258		0	0.99647		0	0.996562		0	0.999359		0	0.995949		0	0.99941		0	0.998766		0	0.999765		0	0.996663		0	1.0008		0	0.998431		0	0.996019		0	0.999278		0	0.996485
0.05	0.988314		0.05	0.995118		0.05	0.994502		0.0500002	0.990402		0.05	0.99283		0.05	0.991558		0.05	0.99358		0.05	0.990755		0.05	0.99152		0.05	0.993784		0.05	0.989198		0.05	0.991644		0.05	0.993563		0.05	0.996925		0.05	0.989965		0.05	0.993505		0.05	0.988357
0.0999999	0.977948		0.0999999	0.983318		0.0999999	0.982055		0.1	0.98374		0.0999999	0.984113		0.0999999	0.982401		0.0999999	0.983035		0.0999999	0.983374		0.0999999	0.985976		0.0999999	0.98045		0.0999999	0.982792		0.0999999	0.979751		0.0999999	0.98071		0.0999999	0.981186		0.0999999	0.981321		0.0999999	0.985077		0.0999999	0.982468
0.15	0.973562		0.15	0.977122		0.15	0.97607		0.15	0.981168		0.15	0.976475		0.15	0.975086		0.15	0.975839		0.15	0.975641		0.15	0.977096		0.15	0.978781		0.15	0.979338		0.15	0.97825		0.15	0.978517		0.15	0.974936		0.15	0.977364		0.15	0.984636		0.15	0.97672
0.2	0.967654		0.2	0.975816		0.2	0.971292		0.2	0.972306		0.2	0.970975		0.2	0.975199		0.2	0.975541		0.2	0.975211		0.2	0.974981		0.2	0.972844		0.2	0.972997		0.2	0.976341		0.2	0.973746		0.2	0.970718		0.2	0.972495		0.2	0.977571		0.2	0.970772
0.25	0.967789		0.25	0.971095		0.25	0.97028		0.2501	0.971372		0.25	0.971845		0.25	0.971851		0.25	0.971559		0.25	0.972717		0.25	0.97145		0.25	0.970252		0.25	0.970744		0.25	0.972808		0.25	0.973389		0.25	0.967028		0.25	0.969865		0.25	0.976857		0.25	0.967041
0.3	0.962692		0.3	0.971828		0.3	0.965727		0.3001	0.968478		0.3	0.970576		0.3	0.970708		0.3	0.969218		0.3	0.969993		0.3	0.971658		0.3	0.972154		0.3	0.970993		0.3	0.969467		0.3	0.967129		0.3	0.97324		0.3	0.970285		0.3	0.974847		0.3	0.965365
0.3501	0.962291		0.35	0.967436		0.35	0.967691		0.3501	0.966364		0.35	0.965799		0.35	0.968165		0.35	0.969394		0.3501	0.967982		0.35	0.970797		0.35	0.968806		0.35	0.967997		0.35	0.969072		0.35	0.970396		0.35	0.961092		0.35	0.966841		0.35	0.971859		0.35	0.964375
0.4001	0.957841		0.4	0.968507		0.4	0.964371		0.4001	0.96974		0.4	0.964836		0.4	0.96605		0.4	0.968779		0.4001	0.967229		0.4	0.96477		0.4	0.965655		0.4	0.965475		0.4	0.969373		0.4	0.968687		0.4	0.961776		0.4	0.966958		0.4	0.971575		0.4	0.957317
0.4501	0.95765		0.45	0.964779		0.45	0.96409		0.4501	0.964887		0.4501	0.962109		0.45	0.965383		0.45	0.965938		0.4501	0.966123		0.45	0.97016		0.45	0.967128		0.45	0.966128		0.4501	0.964679		0.45	0.963075		0.45	0.956499		0.45	0.966103		0.45	0.969658		0.45	0.959666
0.5001	0.957399		0.5	0.964706		0.5	0.962914		0.5001	0.964965		0.5001	0.958991		0.5	0.96765		0.5	0.962673		0.5001	0.9654		0.5	0.964872		0.5	0.964123		0.5	0.9652		0.5001	0.965726		0.5	0.964101		0.5	0.961112		0.5	0.96511		0.5	0.970099		0.5	0.957752
0.5501	0.955931		0.55	0.961995		0.55	0.96318		0.5501	0.965957		0.5501	0.962125		0.55	0.962504		0.55	0.963434		0.5501	0.96593		0.5501	0.962543		0.55	0.966216		0.55	0.962833		0.5501	0.96576		0.55	0.963439		0.55	0.955874		0.55	0.964578		0.55	0.965154		0.55	0.955855
0.6001	0.955052		0.6	0.960577		0.6	0.961457		0.6001	0.96134		0.6001	0.961616		0.6	0.965195		0.6	0.961663		0.6001	0.964394		0.6001	0.960376		0.6	0.964972		0.6	0.965041		0.6001	0.963618		0.6	0.963823		0.6	0.954201		0.6	0.963269		0.6001	0.967207		0.6	0.955487
0.6501	0.95259		0.65	0.960748		0.65	0.958718		0.6501	0.960854		0.6501	0.959175		0.65	0.963484		0.65	0.960116		0.6501	0.96631		0.6501	0.960269		0.65	0.966086		0.65	0.964651		0.6501	0.9624		0.6501	0.961742		0.65	0.950227		0.65	0.962387		0.6501	0.966703		0.65	0.954188
0.7001	0.954067		0.7	0.961831		0.7	0.957633		0.7001	0.960091		0.7001	0.959704		0.7	0.963012		0.7	0.958183		0.7001	0.9628		0.7001	0.960228		0.7	0.962969		0.7	0.962428		0.7001	0.961266		0.7001	0.962446		0.7	0.955745		0.7	0.961512		0.7001	0.963356		0.7	0.953678
0.7501	0.953646		0.75	0.959293		0.75	0.957877		0.7501	0.962582		0.7501	0.955746		0.75	0.962855		0.75	0.960726		0.7501	0.962103		0.7501	0.960315		0.75	0.960126		0.75	0.95849		0.7501	0.960046		0.7501	0.961346		0.75	0.951471		0.75	0.960664		0.7501	0.963874		0.75	0.951329
0.8001	0.950323		0.8	0.959295		0.8	0.957696		0.8001	0.960851		0.8001	0.958471		0.8	0.960761		0.8	0.956582		0.8001	0.960396		0.8001	0.957891		0.8	0.95921		0.8	0.959821		0.8001	0.960138		0.8001	0.958615		0.8	0.948668		0.8	0.959091		0.8001	0.966439		0.8	0.950915
0.8501	0.952069		0.85	0.9554		0.85	0.9546		0.8501	0.960596		0.8501	0.955921		0.85	0.958554		0.85	0.957122		0.8501	0.961653		0.8501	0.958864		0.85	0.961489		0.85	0.95949		0.8501	0.960214		0.8501	0.957118		0.85	0.95186		0.85	0.959276		0.8501	0.959651		0.85	0.9528
0.9001	0.950247		0.9	0.95708		0.9	0.954361		0.9001	0.956123		0.9001	0.957895		0.9	0.960106		0.9	0.9579		0.9001	0.957191		0.9001	0.96027		0.9	0.96303		0.9	0.959986		0.9001	0.956952		0.9001	0.958795		0.9	0.947033		0.9	0.95714		0.9001	0.96112		0.9	0.951818
0.9501	0.949013		0.95	0.955892		0.95	0.95594		0.9501	0.959699		0.9501	0.953798		0.95	0.959556		0.95	0.955366		0.9501	0.958328		0.9501	0.955297		0.95	0.961049		0.95	0.954923		0.9501	0.961177		0.9501	0.95898		0.95	0.945421		0.95	0.958886		0.9501	0.958896		0.95	0.950911
1.0001	0.949948		1	0.959301		1	0.954228		1.0001	0.95958		1.0001	0.954666		1	0.959598		1	0.957119		1.0001	0.957956		1.0001	0.956481		1	0.959636		1	0.958638		1.0001	0.957036		1.0001	0.955562		1	0.943078		1	0.955189		1.0001	0.958614		1	0.948076
1.0501	0.95057		1.05	0.959473		1.05	0.953935		1.0501	0.953321		1.0501	0.95351		1.05	0.95723		1.05	0.955261		1.0501	0.957805		1.0501	0.956156		1.05	0.956523		1.05	0.96143		1.0501	0.959093		1.0501	0.956336		1.05	0.949196		1.05	0.956361		1.0501	0.958716		1.05	0.944929
1.1001	0.945914		1.1	0.956013		1.1	0.954358		1.1001	0.956081		1.1001	0.951785		1.1	0.958799		1.1	0.95457		1.1001	0.956719		1.1001	0.956125		1.1	0.955017		1.1	0.954143		1.1001	0.955252		1.1001	0.95647		1.1	0.946878		1.1	0.95793		1.1001	0.953242		1.1	0.948198
1.1501	0.94772		1.1501	0.958491		1.15	0.953824		1.1501	0.955816		1.1501	0.952755		1.15	0.958637		1.15	0.955219		1.1501	0.958028		1.1501	0.952743		1.15	0.958139		1.15	0.956978		1.1501	0.957543		1.1501	0.955804		1.15	0.944306		1.15	0.954105		1.1501	0.956436		1.15	0.945124
1.2001	0.947825		1.2001	0.954459		1.2	0.951183		1.2001	0.952188		1.2001	0.950223		1.2	0.955543		1.2	0.948764		1.2001	0.955608		1.2001	0.954494		1.2	0.95517		1.2	0.956178		1.2001	0.956146		1.2001	0.953457		1.2	0.943097		1.2	0.956208		1.2001	0.954879		1.2001	0.946322
1.2501	0.94436		1.2501	0.952142		1.25	0.952248		1.2501	0.955615		1.2501	0.950285		1.2501	0.957196		1.25	0.953548		1.2501	0.957963		1.2501	0.952333		1.25	0.957824		1.25	0.952303		1.2501	0.956626		1.2501	0.955479		1.25	0.938284		1.25	0.95569		1.2501	0.954257		1.2501	0.94555
1.3001	0.945198		1.3001	0.953068		1.3001	0.950617		1.3001	0.952556		1.3001	0.952848		1.3001	0.956274		1.3	0.952027		1.3001	0.955203		1.3001	0.951181		1.3	0.956158		1.3	0.953442		1.3001	0.956829		1.3001	0.954569		1.3	0.936881		1.3	0.954341		1.3001	0.956348		1.3001	0.943989
1.3501	0.94325		1.3501	0.954451		1.3501	0.951379		1.3501	0.953819		1.3501	0.950139		1.3501	0.954183		1.35	0.949031		1.3501	0.954546		1.3501	0.956229		1.3501	0.956496		1.35	0.953941		1.3501	0.959084		1.3501	0.954243		1.35	0.937234		1.35	0.955495		1.3501	0.955308		1.3501	0.944014
1.4001	0.943598		1.4001	0.953632		1.4001	0.949508		1.4001	0.955832		1.4001	0.950651		1.4001	0.952738		1.4001	0.950969		1.4001	0.951259		1.4001	0.951832		1.4001	0.953205		1.4	0.952577		1.4001	0.950393		1.4001	0.952192		1.4001	0.943561		1.4	0.953636		1.4001	0.951555		1.4001	0.945904
1.4501	0.945929		1.4501	0.950889		1.4501	0.949249		1.4501	0.954537		1.4501	0.950624		1.4501	0.955159		1.4501	0.952829		1.4501	0.953854		1.4501	0.952802		1.4501	0.954369		1.45	0.953517		1.4501	0.952889		1.4501	0.951287		1.4501	0.936357		1.45	0.950864		1.4501	0.951601		1.4501	0.942336
1.5001	0.940983		1.5001	0.95356		1.5001	0.949332		1.5001	0.955795		1.5001	0.948123		1.5001	0.95359		1.5001	0.952278		1.5001	0.953691		1.5001	0.952631		1.5001	0.956074		1.5	0.955547		1.5001	0.951082		1.5001	0.952045		1.5001	0.938095		1.5	0.952987		1.5001	0.954278		1.5001	0.945878
1.5501	0.943539		1.5501	0.952064		1.5501	0.948048		1.5501	0.954746		1.5501	0.949861		1.5501	0.953662		1.5501	0.947886		1.5501	0.951006		1.5501	0.951541		1.5501	0.956648		1.5501	0.953341		1.5501	0.952048		1.5501	0.950668		1.5501	0.933478		1.55	0.949274		1.5501	0.949946		1.5501	0.940348
1.6001	0.943405		1.6001	0.948095		1.6001	0.94531		1.6001	0.955516		1.6001	0.947186		1.6001	0.952959		1.6001	0.950468		1.6001	0.955166		1.6001	0.949288		1.6001	0.952286		1.6001	0.950353		1.6001	0.951141		1.6001	0.952369		1.6001	0.931155		1.6	0.951751		1.6001	0.94956		1.6001	0.940377
1.6501	0.94389		1.6501	0.951107		1.6501	0.947425		1.6501	0.952146		1.6501	0.946056		1.6501	0.952281		1.6501	0.948524		1.6501	0.949618		1.6501	0.949862		1.6501	0.952772		1.6501	0.951668		1.6501	0.952797		1.6501	0.951496		1.6501	0.934434		1.6501	0.950037		1.6501	0.949543		1.6501	0.943706
1.7001	0.942171		1.7001	0.953652		1.7001	0.947476		1.7001	0.951797		1.7001	0.947404		1.7001	0.950881		1.7001	0.949595		1.7001	0.950799		1.7001	0.951298		1.7001	0.951001		1.7001	0.949972		1.7001	0.950551		1.7001	0.952125		1.7001	0.925595		1.7001	0.95042		1.7001	0.946463		1.7001	0.942217
1.7501	0.943417		1.7501	0.949579		1.7501	0.946291		1.7501	0.949268		1.7501	0.946213		1.7501	0.952472		1.7501	0.946721		1.7501	0.950434		1.7501	0.949272		1.7501	0.952008		1.7501	0.947598		1.7501	0.952277		1.7501	0.949805		1.7501	0.928524		1.7501	0.949043		1.7501	0.949216		1.7501	0.942818
1.8001	0.942132		1.8001	0.950454		1.8001	0.945554		1.8001	0.949296		1.8001	0.948868		1.8001	0.95193		1.8001	0.949876		1.8001	0.948616		1.8001	0.950957		1.8001	0.948592		1.8001	0.948004		1.8001	0.950095		1.8001	0.951901		1.8001	0.927965		1.8001	0.949951		1.8001	0.950522		1.8001	0.940386
1.8501	0.937545		1.8501	0.951447		1.8501	0.945698		1.8501	0.950849		1.8501	0.949364		1.8501	0.952677		1.8501	0.948559		1.8501	0.948697		1.8501	0.947348		1.8501	0.94935		1.8501	0.950494		1.8501	0.950413		1.8501	0.948177		1.8501	0.933056		1.8501	0.949551		1.8501	0.947975		1.8501	0.940095
1.9001	0.938969		1.9001	0.949616		1.9001	0.945884		1.9001	0.951761		1.9001	0.944857		1.9001	0.950257		1.9001	0.946989		1.9001	0.947091		1.9001	0.947948		1.9001	0.951758		1.9001	0.950185		1.9001	0.95187		1.9001	0.950487		1.9001	0.934992		1.9001	0.951306		1.9001	0.945604		1.9001	0.938851
1.9501	0.937935		1.9501	0.948696		1.9501	0.945604		1.9501	0.948512		1.9501	0.946469		1.9501	0.949791		1.9501	0.948699		1.9501	0.950181		1.9501	0.948643		1.9501	0.95042		1.9501	0.948544		1.9501	0.94817		1.9501	0.947949		1.9501	0.932661		1.9501	0.947935		1.9501	0.946739		1.9501	0.939273
2.0001	0.938838		2.0001	0.948863		2.0001	0.941878		2.0001	0.948745		2.0001	0.947188		2.0001	0.947396		2.0001	0.94647		2.0001	0.94655		2.0001	0.945181		2.0001	0.947133		2.0001	0.948285		2.0001	0.950647		2.0001	0.94946		2.0001	0.927615		2.0001	0.947935		2.0001	0.941815		2.0001	0.94007
2.0501	0.938554		2.0501	0.945607		2.0501	0.940594		2.0501	0.951139		2.0501	0.946735		2.0501	0.948046		2.0501	0.945071		2.0501	0.946173		2.0501	0.946866		2.0501	0.949952		2.0501	0.948244		2.0501	0.948813		2.0501	0.948263		2.0501	0.926999		2.0501	0.949326		2.0501	0.945361		2.0501	0.939079
2.1001	0.940476		2.1001	0.945163		2.1001	0.942915		2.1002	0.947536		2.1001	0.943415		2.1001	0.950429		2.1001	0.945145		2.1001	0.948261		2.1001	0.946892		2.1001	0.947716		2.1001	0.947803		2.1001	0.948093		2.1001	0.949356		2.1001	0.929026		2.1001	0.946951		2.1001	0.944032		2.1001	0.940017
2.1501	0.936951		2.1501	0.948586		2.1501	0.942665		2.1502	0.949365		2.1501	0.944503		2.1501	0.950222		2.1501	0.945673		2.1501	0.946839		2.1501	0.945338		2.1501	0.946136		2.1501	0.945446		2.1501	0.94867		2.1501	0.948353		2.1501	0.926961		2.1501	0.946723		2.1501	0.940995		2.1501	0.935575
2.2002	0.938456		2.2001	0.947982		2.2001	0.941688		2.2002	0.949869		2.2001	0.943063		2.2001	0.945926		2.2001	0.945051		2.2002	0.947012		2.2001	0.951026		2.2001	0.94745		2.2001	0.947076		2.2001	0.946711		2.2001	0.946133		2.2001	0.92402		2.2001	0.94692		2.2001	0.939132		2.2001	0.939115
2.2502	0.934591		2.2501	0.947902		2.2501	0.944227		2.2502	0.947338		2.2501	0.944427		2.2501	0.946173		2.2501	0.944559		2.2502	0.945212		2.2501	0.944722		2.2501	0.946922		2.2501	0.945928		2.2501	0.947895		2.2501	0.949107		2.2501	0.923269		2.2501	0.94535		2.2501	0.944376		2.2501	0.937778
2.3002	0.938153		2.3001	0.946884		2.3001	0.939519		2.3002	0.946473		2.3002	0.941614		2.3001	0.949187		2.3001	0.947211		2.3002	0.943098		2.3001	0.94689		2.3001	0.947727		2.3001	0.944317		2.3002	0.945011		2.3001	0.944003		2.3001	0.922859		2.3001	0.947365		2.3001	0.93985		2.3001	0.93748
2.3502	0.937349		2.3501	0.947902		2.3501	0.941505		2.3502	0.949489		2.3502	0.941182		2.3501	0.948189		2.3501	0.945488		2.3502	0.94406		2.3502	0.944222		2.3501	0.942684		2.3501	0.946252		2.3502	0.947442		2.3501	0.94672		2.3501	0.921188		2.3501	0.94831		2.3501	0.94021		2.3501	0.937521
2.4002	0.937623		2.4001	0.946533		2.4001	0.944782		2.4002	0.946897		2.4002	0.942144		2.4001	0.945865		2.4001	0.93944		2.4002	0.947557		2.4002	0.94445		2.4001	0.946133		2.4001	0.942722		2.4002	0.946907		2.4001	0.947095		2.4001	0.923397		2.4001	0.948531		2.4001	0.939191		2.4001	0.933273
2.4502	0.937865		2.4501	0.945023		2.4501	0.941348		2.4502	0.944709		2.4502	0.940052		2.4501	0.947554		2.4501	0.944525		2.4502	0.945415		2.4502	0.944153		2.4501	0.945028		2.4501	0.943334		2.4502	0.946883		2.4502	0.943871		2.4501	0.91461		2.4501	0.947434		2.4502	0.939197		2.4501	0.936419
2.5002	0.931979		2.5001	0.944734		2.5001	0.942878		2.5002	0.946811		2.5002	0.940119		2.5001	0.943967		2.5001	0.941471		2.5002	0.943613		2.5002	0.947243		2.5001	0.945174		2.5001	0.94579		2.5002	0.946186		2.5002	0.946904		2.5001	0.917513		2.5001	0.944523		2.5002	0.93699		2.5001	0.933237
2.5502	0.933372		2.5501	0.943516		2.5501	0.941599		2.5502	0.945404		2.5502	0.940181		2.5501	0.945269		2.5501	0.940021		2.5502	0.942882		2.5502	0.943638		2.5501	0.947087		2.5501	0.944413		2.5502	0.947491		2.5502	0.94508		2.5501	0.923073		2.5501	0.940244		2.5502	0.938127		2.5501	0.934267
2.6002	0.935918		2.6001	0.943644		2.6001	0.940966		2.6002	0.945636		2.6002	0.941436		2.6001	0.943482		2.6001	0.941594		2.6002	0.944694		2.6002	0.942005		2.6001	0.943936		2.6001	0.942007		2.6002	0.944839		2.6002	0.942449		2.6001	0.915201		2.6001	0.944276		2.6002	0.937415		2.6001	0.935455
2.6502	0.936185		2.6501	0.945457		2.6501	0.937031		2.6502	0.944957		2.6502	0.940158		2.6501	0.94336		2.6501	0.941554		2.6502	0.942471		2.6502	0.941607		2.6501	0.941653		2.6501	0.942584		2.6502	0.943901		2.6502	0.941405		2.6501	0.918833		2.6501	0.945901		2.6502	0.941161		2.6501	0.934044
2.7002	0.93635		2.7001	0.943417		2.7001	0.938863		2.7002	0.94428		2.7002	0.939884		2.7001	0.945369		2.7001	0.941721		2.7002	0.944063		2.7002	0.941251		2.7001	0.945633		2.7001	0.944904		2.7002	0.944151		2.7002	0.942817		2.7001	0.916062		2.7001	0.945357		2.7002	0.937637		2.7001	0.934466
2.7502	0.935156		2.7501	0.941697		2.7501	0.941375		2.7502	0.944964		2.7502	0.940154		2.7501	0.945084		2.7501	0.940735		2.7502	0.94395		2.7502	0.942496		2.7501	0.942738		2.7501	0.942302		2.7502	0.942305		2.7502	0.944887		2.7501	0.913308		2.7501	0.946302		2.7502	0.936441		2.7501	0.935036
2.8002	0.935931		2.8001	0.944704		2.8001	0.939439		2.8002	0.94294		2.8002	0.940336		2.8001	0.945732		2.8001	0.936842		2.8002	0.943603		2.8002	0.942182		2.8001	0.946452		2.8001	0.943294		2.8002	0.943174		2.8002	0.943265		2.8001	0.913772		2.8001	0.941482		2.8002	0.935178		2.8001	0.938729
2.8502	0.935879		2.8501	0.943953		2.8501	0.941672		2.8502	0.941663		2.8502	0.937466		2.8501	0.94152		2.8501	0.941099		2.8502	0.940987		2.8502	0.939907		2.8501	0.942304		2.8501	0.940596		2.8502	0.943052		2.8502	0.942566		2.8501	0.914328		2.8501	0.943943		2.8502	0.935893		2.8501	0.935442
2.9002	0.936643		2.9001	0.942989		2.9001	0.939979		2.9002	0.942477		2.9002	0.93832		2.9001	0.943433		2.9001	0.938855		2.9002	0.939451		2.9002	0.940237		2.9001	0.941622		2.9001	0.940352		2.9002	0.939474		2.9002	0.94418		2.9001	0.917258		2.9001	0.944886		2.9002	0.93628		2.9001	0.934686
2.9502	0.932709		2.9501	0.940551		2.9501	0.937546		2.9502	0.943631		2.9502	0.940273		2.9501	0.941267		2.9501	0.940183		2.9502	0.940724		2.9502	0.940136		2.9501	0.942802		2.9501	0.942759		2.9502	0.941002		2.9502	0.94277		2.9501	0.916453		2.9501	0.94184		2.9502	0.931792		2.9501	0.932843
3.0002	0.935594		3.0002	0.942498		3.0001	0.940177		3.0002	0.941024		3.0002	0.937729		3.0001	0.942601		3.0001	0.940765		3.0002	0.944732		3.0002	0.941592		3.0001	0.943083		3.0001	0.940495		3.0002	0.941568		3.0002	0.943101		3.0001	0.913698		3.0001	0.941775		3.0002	0.934989		3.0002	0.933346
3.0502	0.932988		3.0502	0.94481		3.0501	0.941229		3.0502	0.942014		3.0502	0.938308		3.0501	0.944361		3.0501	0.938937		3.0502	0.941037		3.0502	0.938539		3.0501	0.940279		3.0501	0.938717		3.0502	0.941489		3.0502	0.937336		3.0501	0.913192		3.0501	0.941389		3.0502	0.930282		3.0502	0.9331
3.1002	0.934132		3.1002	0.941832		3.1001	0.936339		3.1002	0.940936		3.1002	0.939697		3.1002	0.94246		3.1001	0.940193		3.1002	0.942151		3.1002	0.943145		3.1001	0.940782		3.1001	0.93971		3.1002	0.942873		3.1002	0.941342		3.1001	0.913066		3.1001	0.941723		3.1002	0.936101		3.1002	0.933037
3.1502	0.93557		3.1502	0.940555		3.1502	0.937851		3.1502	0.94276		3.1502	0.937353		3.1502	0.941442		3.1501	0.937626		3.1502	0.941032		3.1502	0.936881		3.1501	0.940192		3.1501	0.94023		3.1502	0.941757		3.1502	0.939816		3.1501	0.912288		3.1501	0.938709		3.1502	0.935386		3.1502	0.932511
3.2002	0.932923		3.2002	0.939036		3.2002	0.936607		3.2002	0.941843		3.2002	0.933985		3.2002	0.94056		3.2002	0.940103		3.2002	0.938418		3.2002	0.940232		3.2002	0.941024		3.2001	0.938322		3.2002	0.94165		3.2002	0.939111		3.2001	0.907127		3.2001	0.942691		3.2002	0.93296		3.2002	0.931351
3.2502	0.935911		3.2502	0.940157		3.2502	0.938595		3.2502	0.941163		3.2502	0.936546		3.2502	0.941084		3.2502	0.937932		3.2502	0.937385		3.2502	0.938742		3.2502	0.941128		3.2501	0.937745		3.2502	0.941018		3.2502	0.939529		3.2501	0.913533		3.2501	0.938573		3.2502	0.928123		3.2502	0.930061
3.3002	0.934866		3.3002	0.941493		3.3002	0.93327		3.3002	0.941171		3.3002	0.940098		3.3002	0.939971		3.3002	0.934774		3.3002	0.936928		3.3002	0.939762		3.3002	0.937787		3.3001	0.939577		3.3002	0.93795		3.3002	0.939761		3.3002	0.911906		3.3001	0.942104		3.3002	0.934088		3.3002	0.929377
3.3502	0.931387		3.3502	0.938276		3.3502	0.936556		3.3502	0.940037		3.3502	0.935893		3.3502	0.939504		3.3502	0.939523		3.3502	0.938968		3.3502	0.939415		3.3502	0.937655		3.3501	0.937032		3.3502	0.942163		3.3502	0.938762		3.3502	0.908302		3.3501	0.936983		3.3502	0.930619		3.3502	0.930582
3.4002	0.932473		3.4002	0.938914		3.4002	0.939076		3.4002	0.940731		3.4002	0.934333		3.4002	0.942135		3.4002	0.93924		3.4002	0.937951		3.4002	0.938085		3.4002	0.939242		3.4002	0.939656		3.4002	0.939895		3.4002	0.93939		3.4002	0.907692		3.4001	0.938635		3.4002	0.932743		3.4002	0.93246
3.4502	0.934252		3.4502	0.940361		3.4502	0.935174		3.4502	0.941224		3.4502	0.934459		3.4502	0.937301		3.4502	0.938963		3.4502	0.935534		3.4502	0.936183		3.4502	0.93855		3.4502	0.937811		3.4502	0.936773		3.4502	0.93943		3.4502	0.909165		3.4502	0.941436		3.4502	0.932176		3.4502	0.930016
3.5002	0.933363		3.5002	0.939921		3.5002	0.932347		3.5002	0.940521		3.5002	0.934061		3.5002	0.936154		3.5002	0.935709		3.5002	0.936592		3.5002	0.936586		3.5002	0.939077		3.5002	0.936661		3.5002	0.9426		3.5002	0.938016		3.5002	0.908837		3.5002	0.939172		3.5002	0.930809		3.5002	0.928344
3.5502	0.931957		3.5502	0.942683		3.5502	0.935907		3.5502	0.939556		3.5502	0.936407		3.5502	0.939637		3.5502	0.937111		3.5502	0.93768		3.5502	0.938116		3.5502	0.941581		3.5502	0.937925		3.5502	0.939321		3.5502	0.939652		3.5502	0.909213		3.5502	0.938524		3.5502	0.928399		3.5502	0.930127
3.6002	0.929712		3.6002	0.939928		3.6002	0.936671		3.6002	0.937679		3.6002	0.933644		3.6002	0.938403		3.6002	0.937492		3.6002	0.938913		3.6002	0.935751		3.6002	0.938564		3.6002	0.937895		3.6002	0.9373		3.6002	0.937084		3.6002	0.905589		3.6002	0.938686		3.6002	0.93181		3.6002	0.930503
3.6502	0.931151		3.6502	0.9385		3.6502	0.936467		3.6502	0.936402		3.6502	0.937233		3.6502	0.938158		3.6502	0.93742		3.6502	0.938915		3.6502	0.935552		3.6502	0.937122		3.6502	0.935381		3.6502	0.938653		3.6502	0.937769		3.6502	0.914505		3.6502	0.939594		3.6502	0.929181		3.6502	0.930354
3.7002	0.932992		3.7002	0.93695		3.7002	0.935309		3.7002	0.936988		3.7002	0.934414		3.7002	0.939403		3.7002	0.937148		3.7002	0.93496		3.7002	0.936443		3.7002	0.937232		3.7002	0.935932		3.7002	0.939855		3.7002	0.937504		3.7002	0.906162		3.7002	0.938603		3.7002	0.927506		3.7002	0.928087
3.7502	0.931176		3.7502	0.941175		3.7502	0.935403		3.7502	0.939962		3.7502	0.93585		3.7502	0.93628		3.7502	0.935906		3.7502	0.938296		3.7502	0.933709		3.7502	0.937094		3.7502	0.934455		3.7502	0.937203		3.7502	0.940154		3.7502	0.908349		3.7502	0.933934		3.7502	0.928732		3.7502	0.930705
3.8002	0.933178		3.8002	0.938861		3.8002	0.937043		3.8002	0.938408		3.8002	0.934965		3.8002	0.937785		3.8002	0.939432		3.8002	0.936972		3.8002	0.931599		3.8002	0.935416		3.8002	0.93547		3.8002	0.935483		3.8002	0.934748		3.8002	0.906751		3.8002	0.936449		3.8002	0.925456		3.8002	0.930629
3.8502	0.92862		3.8502	0.934875		3.8502	0.932885		3.8502	0.936538		3.8502	0.93281		3.8502	0.938315		3.8502	0.936808		3.8502	0.935062		3.8502	0.933857		3.8502	0.934729		3.8502	0.935183		3.8502	0.937898		3.8502	0.934546		3.8502	0.903596		3.8502	0.932525		3.8502	0.924244		3.8502	0.927692
3.9002	0.929894		3.9002	0.936927		3.9002	0.93479		3.9003	0.937788		3.9002	0.933219		3.9002	0.933311		3.9002	0.934088		3.9002	0.936725		3.9002	0.933703		3.9002	0.933131		3.9002	0.935272		3.9002	0.936716		3.9002	0.935952		3.9002	0.904416		3.9002	0.938692		3.9002	0.928862		3.9002	0.93093
3.9502	0.928231		3.9502	0.938477		3.9502	0.935663		3.9503	0.939399		3.9502	0.93487		3.9502	0.936723		3.9502	0.933098		3.9502	0.936283		3.9502	0.934364		3.9502	0.935184		3.9502	0.934596		3.9502	0.938794		3.9502	0.937412		3.9502	0.900396		3.9502	0.936223		3.9502	0.926512		3.9502	0.926556
4.0003	0.92884		4.0002	0.932973		4.0002	0.932567		4.0003	0.93642		4.0002	0.931871		4.0002	0.936419		4.0002	0.935088		4.0002	0.936168		4.0002	0.933869		4.0002	0.935681		4.0002	0.934438		4.0002	0.934193		4.0002	0.938572		4.0002	0.901561		4.0002	0.937834		4.0002	0.923864		4.0002	0.927799
4.0503	0.929143		4.0502	0.933847		4.0502	0.93421		4.0503	0.937185		4.0502	0.933087		4.0502	0.934812		4.0502	0.937762		4.0503	0.934075		4.0502	0.933367		4.0502	0.932008		4.0502	0.934423		4.0502	0.937878		4.0502	0.935522		4.0502	0.900443		4.0502	0.93619		4.0502	0.925761		4.0502	0.928169
4.1003	0.931225		4.1002	0.93536		4.1002	0.936623		4.1003	0.936058		4.1003	0.9333		4.1002	0.934501		4.1002	0.935909		4.1003	0.934486		4.1002	0.932175		4.1002	0.936546		4.1002	0.933044		4.1002	0.93705		4.1002	0.936796		4.1002	0.899555		4.1002	0.936193		4.1002	0.9243		4.1002	0.925773
4.1503	0.929159		4.1502	0.935218		4.1502	0.936148		4.1503	0.935331		4.1503	0.930095		4.1502	0.935101		4.1502	0.935561		4.1503	0.933994		4.1502	0.931947		4.1502	0.93544		4.1502	0.935099		4.1503	0.935573		4.1502	0.933989		4.1502	0.898227		4.1502	0.934486		4.1502	0.924005		4.1502	0.929485
4.2003	0.932135		4.2002	0.935186		4.2002	0.931322		4.2003	0.934849		4.2003	0.932192		4.2002	0.93525		4.2002	0.933475		4.2003	0.933384		4.2003	0.931353		4.2002	0.93465		4.2002	0.931419		4.2003	0.933751		4.2002	0.935563		4.2002	0.909685		4.2002	0.93394		4.2002	0.926411		4.2002	0.92753
4.2503	0.929748		4.2502	0.937255		4.2502	0.930276		4.2503	0.933761		4.2503	0.931741		4.2502	0.933108		4.2502	0.935652		4.2503	0.934985		4.2503	0.931115		4.2502	0.935655		4.2502	0.93402		4.2503	0.934115		4.2502	0.934511		4.2502	0.905949		4.2502	0.934595		4.2503	0.925606		4.2502	0.926272
4.3003	0.929544		4.3002	0.936359		4.3002	0.932238		4.3003	0.935986		4.3003	0.931837		4.3002	0.935677		4.3002	0.934912		4.3003	0.935211		4.3003	0.930768		4.3002	0.93288		4.3002	0.932448		4.3003	0.933493		4.3003	0.933556		4.3002	0.904039		4.3002	0.936927		4.3003	0.924334		4.3002	0.925988
4.3503	0.929172		4.3502	0.936757		4.3502	0.93028		4.3503	0.935177		4.3503	0.930113		4.3502	0.934428		4.3502	0.932806		4.3503	0.931887		4.3503	0.933423		4.3502	0.929742		4.3502	0.930794		4.3503	0.933165		4.3503	0.932738		4.3502	0.90364		4.3502	0.935181		4.3503	0.92357		4.3502	0.925105
4.4003	0.927088		4.4002	0.934385		4.4002	0.931143		4.4003	0.934179		4.4003	0.93004		4.4002	0.934563		4.4002	0.934369		4.4003	0.932173		4.4003	0.933182		4.4002	0.933587		4.4002	0.929294		4.4003	0.934089		4.4003	0.933094		4.4002	0.89891		4.4002	0.934745		4.4003	0.922799		4.4002	0.926631
4.4503	0.929764		4.4502	0.933061		4.4502	0.929632		4.4503	0.935571		4.4503	0.931038		4.4502	0.934488		4.4502	0.934705		4.4503	0.934948		4.4503	0.932846		4.4502	0.932265		4.4502	0.934371		4.4503	0.935235		4.4503	0.933551		4.4502	0.904076		4.4502	0.931809		4.4503	0.924706		4.4502	0.926251
4.5003	0.928696		4.5002	0.93468		4.5002	0.932729		4.5003	0.932564		4.5003	0.930702		4.5002	0.934546		4.5002	0.938556		4.5003	0.931827		4.5003	0.933539		4.5002	0.930604		4.5002	0.932221		4.5003	0.934568		4.5003	0.931418		4.5002	0.897365		4.5002	0.933806		4.5003	0.922549		4.5002	0.923975
4.5503	0.929262		4.5502	0.932214		4.5502	0.9315		4.5503	0.93632		4.5503	0.930142		4.5502	0.930299		4.5502	0.933531		4.5503	0.930659		4.5503	0.929516		4.5502	0.929489		4.5502	0.92833		4.5503	0.935249		4.5503	0.933871		4.5502	0.898515		4.5502	0.933365		4.5503	0.92369		4.5502	0.924858
4.6003	0.929746		4.6002	0.93402		4.6002	0.929499		4.6003	0.934985		4.6003	0.928392		4.6002	0.931787		4.6002	0.936472		4.6003	0.933249		4.6003	0.929811		4.6002	0.930521		4.6002	0.929382		4.6003	0.936091		4.6003	0.931394		4.6002	0.898286		4.6002	0.933907		4.6003	0.920081		4.6002	0.923841
4.6503	0.926706		4.6502	0.935569		4.6502	0.929867		4.6503	0.934171		4.6503	0.927882		4.6502	0.931256		4.6502	0.931843		4.6503	0.930393		4.6503	0.930305		4.6502	0.930793		4.6502	0.930537		4.6503	0.935307		4.6503	0.931505		4.6502	0.896702		4.6502	0.933037		4.6503	0.920647		4.6502	0.925251
4.7003	0.926834		4.7002	0.93582		4.7002	0.932829		4.7003	0.932836		4.7003	0.931124		4.7002	0.9336		4.7002	0.931648		4.7003	0.929933		4.7003	0.933169		4.7002	0.929518		4.7002	0.928456		4.7003	0.932951		4.7003	0.931934		4.7002	0.898349		4.7002	0.933157		4.7003	0.918095		4.7002	0.927269
4.7503	0.929988		4.7502	0.932788		4.7502	0.929212		4.7503	0.931524		4.7503	0.92927		4.7502	0.931046		4.7502	0.935549		4.7503	0.930341		4.7503	0.932794		4.7502	0.930353		4.7502	0.927822		4.7503	0.931537		4.7503	0.93429		4.7502	0.901723		4.7502	0.933473		4.7503	0.922235		4.7502	0.926146
4.8003	0.927191		4.8003	0.934532		4.8002	0.932299		4.8003	0.933073		4.8003	0.929341		4.8002	0.93274		4.8002	0.932582		4.8003	0.931215		4.8003	0.928548		4.8002	0.929334		4.8002	0.930418		4.8003	0.932652		4.8003	0.935452		4.8002	0.903405		4.8002	0.932248		4.8003	0.920473		4.8002	0.924754
4.8503	0.929752		4.8503	0.93455		4.8502	0.931587		4.8503	0.932523		4.8503	0.926927		4.8502	0.931079		4.8502	0.934189		4.8503	0.931847		4.8503	0.929958		4.8502	0.931187		4.8502	0.929633		4.8503	0.93286		4.8503	0.932279		4.8502	0.899213		4.8502	0.932627		4.8503	0.923274		4.8503	0.924115
4.9003	0.926828		4.9003	0.933507		4.9002	0.931185		4.9003	0.933931		4.9003	0.923923		4.9003	0.930785		4.9002	0.933153		4.9003	0.931526		4.9003	0.929895		4.9002	0.930508		4.9002	0.930941		4.9003	0.931896		4.9003	0.933134		4.9002	0.893957		4.9002	0.932458		4.9003	0.921054		4.9003	0.923674
4.9503	0.928902		4.9503	0.930863		4.9502	0.929553		4.9503	0.933467		4.9503	0.928109		4.9503	0.932734		4.9502	0.931801		4.9503	0.929396		4.9503	0.928201		4.9502	0.928631		4.9502	0.930405		4.9503	0.933131		4.9503	0.93276		4.9502	0.897843		4.9502	0.930157		4.9503	0.916407		4.9503	0.9235
5.0003	0.926395		5.0003	0.933148		5.0003	0.930167		5.0003	0.932688		5.0003	0.927691		5.0003	0.931111		5.0002	0.93478		5.0003	0.931097		5.0003	0.926438		5.0003	0.926774		5.0002	0.92952		5.0003	0.932038		5.0003	0.932288		5.0002	0.896446		5.0002	0.932221		5.0003	0.921052		5.0003	0.925662
5.0503	0.927329		5.0503	0.934612		5.0503	0.930904		5.0503	0.931466		5.0503	0.928613		5.0503	0.931853		5.0503	0.933797		5.0503	0.92792		5.0503	0.927397		5.0503	0.930058		5.0502	0.928632		5.0503	0.930295		5.0503	0.929108		5.0502	0.89849		5.0502	0.931782		5.0503	0.918903		5.0503	0.926168
5.1003	0.927728		5.1003	0.930341		5.1003	0.929632		5.1003	0.930887		5.1003	0.926555		5.1003	0.928974		5.1003	0.932139		5.1003	0.929559		5.1003	0.928976		5.1003	0.931469		5.1002	0.928997		5.1003	0.931623		5.1003	0.930054		5.1003	0.89283		5.1002	0.929721		5.1003	0.918475		5.1003	0.923756
5.1503	0.926934		5.1503	0.933		5.1503	0.928973		5.1503	0.930712		5.1503	0.928287		5.1503	0.931851		5.1503	0.933005		5.1503	0.926702		5.1503	0.929302		5.1503	0.927134		5.1502	0.929943		5.1503	0.930558		5.1503	0.931957		5.1503	0.897824		5.1502	0.931484		5.1503	0.920372		5.1503	0.924367
5.2003	0.928426		5.2003	0.930945		5.2003	0.929662		5.2003	0.93265		5.2003	0.925559		5.2003	0.931828		5.2003	0.929871		5.2003	0.927469		5.2003	0.926023		5.2003	0.928018		5.2003	0.929486		5.2003	0.931166		5.2003	0.928956		5.2003	0.894119		5.2002	0.934911		5.2003	0.91875		5.2003	0.92435
5.2503	0.925112		5.2503	0.929013		5.2503	0.928603		5.2503	0.929484		5.2503	0.925505		5.2503	0.929509		5.2503	0.931913		5.2503	0.929258		5.2503	0.928563		5.2503	0.927332		5.2503	0.928996		5.2503	0.931111		5.2503	0.930933		5.2503	0.900502		5.2502	0.929387		5.2503	0.918628		5.2503	0.922569
5.3003	0.92927		5.3003	0.930707		5.3003	0.929502		5.3003	0.929621		5.3003	0.926436		5.3003	0.931647		5.3003	0.933087		5.3003	0.930303		5.3003	0.928756		5.3003	0.92868		5.3003	0.924497		5.3003	0.931257		5.3003	0.929818		5.3003	0.89361		5.3003	0.927767		5.3003	0.920939		5.3003	0.922752
5.3503	0.925987		5.3503	0.928738		5.3503	0.927371		5.3503	0.932077		5.3503	0.924634		5.3503	0.929229		5.3503	0.930275		5.3503	0.927546		5.3503	0.926461		5.3503	0.927657		5.3503	0.927957		5.3503	0.929998		5.3503	0.931194		5.3503	0.897147		5.3503	0.926984		5.3503	0.913898		5.3503	0.924723
5.4003	0.926366		5.4003	0.93062		5.4003	0.927647		5.4003	0.928124		5.4003	0.926369		5.4003	0.928171		5.4003	0.930048		5.4003	0.930234		5.4003	0.927981		5.4003	0.929714		5.4003	0.925385		5.4003	0.930205		5.4003	0.93034		5.4003	0.897669		5.4003	0.930345		5.4003	0.915904		5.4003	0.919703
5.4503	0.924021		5.4503	0.929711		5.4503	0.928793		5.4503	0.93013		5.4503	0.92802		5.4503	0.927474		5.4503	0.932118		5.4503	0.929236		5.4503	0.926021		5.4503	0.92705		5.4503	0.927434		5.4503	0.929871		5.4503	0.927499		5.4503	0.893621		5.4503	0.931963		5.4503	0.913161		5.4503	0.923558
5.5003	0.925098		5.5003	0.931646		5.5003	0.930001		5.5003	0.927608		5.5003	0.926467		5.5003	0.929143		5.5003	0.930838		5.5003	0.926513		5.5003	0.928009		5.5003	0.928419		5.5003	0.926759		5.5003	0.929385		5.5003	0.926952		5.5003	0.894242		5.5003	0.930199		5.5003	0.916469		5.5003	0.920837
5.5503	0.925348		5.5503	0.925951		5.5503	0.925361		5.5503	0.927554		5.5503	0.925253		5.5503	0.928999		5.5503	0.932671		5.5503	0.927699		5.5503	0.926039		5.5503	0.927307		5.5503	0.928751		5.5503	0.931582		5.5503	0.931003		5.5503	0.891339		5.5503	0.931192		5.5503	0.91456		5.5503	0.92243
5.6003	0.924718		5.6003	0.929342		5.6003	0.928528		5.6003	0.928358		5.6003	0.92524		5.6003	0.930831		5.6003	0.927006		5.6003	0.930086		5.6003	0.926121		5.6003	0.927024		5.6003	0.927295		5.6003	0.928169		5.6003	0.928985		5.6003	0.89795		5.6003	0.931771		5.6003	0.913604		5.6003	0.922193
5.6503	0.923492		5.6503	0.932042		5.6503	0.925652		5.6503	0.929913		5.6503	0.92752		5.6503	0.930848		5.6503	0.930271		5.6503	0.927333		5.6503	0.928511		5.6503	0.925659		5.6503	0.925941		5.6503	0.92889		5.6503	0.926287		5.6503	0.898564		5.6503	0.930962		5.6503	0.914664		5.6503	0.920744
5.7003	0.927777		5.7003	0.929064		5.7003	0.924397		5.7003	0.928217		5.7003	0.923679		5.7003	0.930012		5.7003	0.93293		5.7003	0.925746		5.7003	0.923654		5.7003	0.924992		5.7003	0.925141		5.7003	0.930499		5.7003	0.928503		5.7003	0.891094		5.7003	0.927298		5.7003	0.916407		5.7003	0.919959
5.7503	0.923919		5.7503	0.930818		5.7503	0.927145		5.7504	0.92997		5.7503	0.925574		5.7503	0.929471		5.7503	0.930097		5.7503	0.927297		5.7503	0.923721		5.7503	0.928978		5.7503	0.926783		5.7503	0.928047		5.7503	0.927731		5.7503	0.897016		5.7503	0.929916		5.7503	0.915743		5.7503	0.91938
5.8003	0.924296		5.8003	0.927411		5.8003	0.92564		5.8004	0.929915		5.8003	0.92196		5.8003	0.930274		5.8003	0.929635		5.8003	0.926082		5.8003	0.925877		5.8003	0.925443		5.8003	0.924939		5.8003	0.927582		5.8003	0.928382		5.8003	0.889245		5.8003	0.92744		5.8003	0.914601		5.8003	0.925335
5.8504	0.925634		5.8503	0.930636		5.8503	0.928589		5.8504	0.928912		5.8503	0.923999		5.8503	0.929427		5.8503	0.92894		5.8504	0.92603		5.8503	0.928024		5.8503	0.928062		5.8503	0.926558		5.8503	0.928196		5.8503	0.928199		5.8503	0.891279		5.8503	0.92526		5.8503	0.915872		5.8503	0.920764
5.9004	0.924733		5.9003	0.925985		5.9003	0.924519		5.9004	0.928292		5.9003	0.925753		5.9003	0.930874		5.9003	0.931213		5.9004	0.924365		5.9003	0.927325		5.9003	0.92644		5.9003	0.924764		5.9003	0.928034		5.9003	0.925999		5.9003	0.892089		5.9003	0.928898		5.9003	0.915329		5.9003	0.919798
5.9504	0.925291		5.9503	0.92912		5.9503	0.927781		5.9504	0.927807		5.9504	0.921963		5.9503	0.928038		5.9503	0.931113		5.9504	0.926602		5.9503	0.924878		5.9503	0.926708		5.9503	0.925771		5.9504	0.928659		5.9503	0.927785		5.9503	0.891924		5.9503	0.924737		5.9503	0.913462		5.9503	0.920829
6.0004	0.925737		6.0003	0.928775		6.0003	0.92712		6.0004	0.926651		6.0004	0.924623		6.0003	0.924931		6.0003	0.929603		6.0004	0.922767		6.0004	0.922745		6.0003	0.925693		6.0003	0.927465		6.0004	0.92865		6.0003	0.926842		6.0003	0.885281		6.0003	0.929147		6.0003	0.911742		6.0003	0.920186
6.0504	0.925756		6.0503	0.927521		6.0503	0.925409		6.0504	0.92399		6.0504	0.922335		6.0503	0.924265		6.0503	0.928897		6.0504	0.923164		6.0504	0.92375		6.0503	0.925129		6.0503	0.923726		6.0504	0.927627		6.0503	0.925095		6.0503	0.890353		6.0503	0.925269		6.0503	0.915599		6.0503	0.91869
6.1004	0.923602		6.1003	0.928719		6.1003	0.925682		6.1004	0.926734		6.1004	0.922975		6.1003	0.928877		6.1003	0.929361		6.1004	0.926447		6.1004	0.927195		6.1003	0.925555		6.1003	0.920889		6.1004	0.926825		6.1003	0.927124		6.1003	0.89623		6.1003	0.928842		6.1004	0.916078		6.1003	0.920712
6.1504	0.926779		6.1503	0.926648		6.1503	0.926256		6.1504	0.924895		6.1504	0.922427		6.1503	0.924037		6.1503	0.930027		6.1504	0.923738		6.1504	0.924457		6.1503	0.926878		6.1503	0.923073		6.1504	0.928337		6.1504	0.925487		6.1503	0.887872		6.1503	0.926935		6.1504	0.91034		6.1503	0.921225
6.2004	0.924244		6.2003	0.928542		6.2003	0.923432		6.2004	0.924635		6.2004	0.922199		6.2003	0.92753		6.2003	0.925905		6.2004	0.925504		6.2004	0.922239		6.2003	0.925023		6.2003	0.924177		6.2004	0.928175		6.2004	0.927428		6.2003	0.892313		6.2003	0.927809		6.2004	0.912591		6.2003	0.921519
6.2504	0.9234		6.2503	0.925753		6.2503	0.92314		6.2504	0.927087		6.2504	0.926541		6.2503	0.92533		6.2503	0.927676		6.2504	0.924013		6.2504	0.922418		6.2503	0.92549		6.2503	0.923077		6.2504	0.925009		6.2504	0.924325		6.2503	0.884743		6.2503	0.926475		6.2504	0.912203		6.2503	0.919891
6.3004	0.922279		6.3003	0.928113		6.3003	0.925471		6.3004	0.925813		6.3004	0.920639		6.3003	0.924773		6.3003	0.928913		6.3004	0.926352		6.3004	0.921959		6.3003	0.924607		6.3003	0.921829		6.3004	0.927907		6.3004	0.927034		6.3003	0.893951		6.3003	0.927792		6.3004	0.913178		6.3003	0.920736
6.3504	0.924961		6.3503	0.924365		6.3503	0.925097		6.3504	0.927182		6.3504	0.922193		6.3503	0.926131		6.3503	0.928825		6.3504	0.923795		6.3504	0.924179		6.3503	0.921659		6.3503	0.924146		6.3504	0.929234		6.3504	0.925835		6.3503	0.886421		6.3503	0.928673		6.3504	0.912896		6.3503	0.920146
6.4004	0.923363		6.4003	0.92599		6.4003	0.926764		6.4004	0.927177		6.4004	0.920513		6.4003	0.927958		6.4003	0.927356		6.4004	0.926046		6.4004	0.924048		6.4003	0.924298		6.4003	0.924481		6.4004	0.927837		6.4004	0.925604		6.4003	0.885175		6.4003	0.926072		6.4004	0.914537		6.4003	0.919886
6.4504	0.923787		6.4503	0.926819		6.4503	0.927445		6.4504	0.930363		6.4504	0.921165		6.4503	0.926104		6.4503	0.931913		6.4504	0.92227		6.4504	0.92383		6.4503	0.92236		6.4503	0.920612		6.4504	0.925113		6.4504	0.924015		6.4503	0.886977		6.4503	0.925559		6.4504	0.908525		6.4503	0.920658
6.5004	0.921713		6.5003	0.928502		6.5003	0.92716		6.5004	0.925119		6.5004	0.922717		6.5003	0.92438		6.5003	0.926806		6.5004	0.924508		6.5004	0.922761		6.5003	0.922338		6.5003	0.924834		6.5004	0.925535		6.5004	0.923513		6.5003	0.884374		6.5003	0.928579		6.5004	0.912682		6.5003	0.917813
6.5504	0.923102		6.5503	0.927731		6.5503	0.92547		6.5504	0.925524		6.5504	0.922252		6.5503	0.926349		6.5503	0.927963		6.5504	0.922711		6.5504	0.919843		6.5503	0.920448		6.5503	0.923626		6.5504	0.928284		6.5504	0.92708		6.5503	0.889291		6.5503	0.929115		6.5504	0.911674		6.5503	0.917356
6.6004	0.922164		6.6003	0.92672		6.6003	0.92498		6.6004	0.925279		6.6004	0.921322		6.6003	0.923741		6.6003	0.928687		6.6004	0.923549		6.6004	0.922404		6.6003	0.922036		6.6003	0.921536		6.6004	0.923138		6.6004	0.925833		6.6003	0.88813		6.6003	0.926861		6.6004	0.912529		6.6003	0.919124
6.6504	0.923625		6.6504	0.925001		6.6503	0.923835		6.6504	0.926489		6.6504	0.921796		6.6503	0.922802		6.6503	0.925656		6.6504	0.921569		6.6504	0.924237		6.6503	0.925593		6.6503	0.923203		6.6504	0.92507		6.6504	0.923771		6.6503	0.88985		6.6503	0.926031		6.6504	0.910237		6.6504	0.920825
6.7004	0.923755		6.7004	0.928066		6.7003	0.923831		6.7004	0.926484		6.7004	0.920074		6.7003	0.924198		6.7003	0.929649		6.7004	0.921712		6.7004	0.921486		6.7003	0.921102		6.7003	0.92089		6.7004	0.924858		6.7004	0.924073		6.7003	0.886069		6.7003	0.926624		6.7004	0.911057		6.7004	0.917522
6.7504	0.921648		6.7504	0.92553		6.7503	0.924975		6.7504	0.928382		6.7504	0.923472		6.7504	0.92523		6.7503	0.928339		6.7504	0.925775		6.7504	0.921778		6.7503	0.922073		6.7503	0.920417		6.7504	0.924432		6.7504	0.924704		6.7503	0.885807		6.7503	0.926201		6.7504	0.909073		6.7504	0.918189
6.8004	0.920602		6.8004	0.922671		6.8004	0.924425		6.8004	0.924611		6.8004	0.924717		6.8004	0.924246		6.8003	0.927386		6.8004	0.922187		6.8004	0.92151		6.8003	0.922545		6.8003	0.920419		6.8004	0.923037		6.8004	0.924372		6.8003	0.887957		6.8003	0.924606		6.8004	0.90564		6.8004	0.920104
6.8504	0.918658		6.8504	0.926896		6.8504	0.922849		6.8504	0.924482		6.8504	0.921067		6.8504	0.925645		6.8503	0.930701		6.8504	0.923779		6.8504	0.919322		6.8504	0.924808		6.8503	0.920648		6.8504	0.927657		6.8504	0.923668		6.8503	0.884815		6.8503	0.926136		6.8504	0.906744		6.8504	0.919762
6.9004	0.92397		6.9004	0.923312		6.9004	0.92509		6.9004	0.925471		6.9004	0.920852		6.9004	0.924472		6.9004	0.926921		6.9004	0.919811		6.9004	0.919889		6.9004	0.921342		6.9003	0.921675		6.9004	0.927757		6.9004	0.924168		6.9003	0.885916		6.9003	0.923393		6.9004	0.907744		6.9004	0.919106
6.9504	0.923098		6.9504	0.925274		6.9504	0.924267		6.9504	0.925573		6.9504	0.919146		6.9504	0.923164		6.9504	0.928144		6.9504	0.922453		6.9504	0.922825		6.9504	0.921956		6.9503	0.919345		6.9504	0.926531		6.9504	0.925502		6.9504	0.886173		6.9503	0.925585		6.9504	0.906151		6.9504	0.916492
7.0004	0.924123		7.0004	0.923097		7.0004	0.920754		7.0004	0.923051		7.0004	0.921474		7.0004	0.923306		7.0004	0.927016		7.0004	0.922506		7.0004	0.922069		7.0004	0.923488		7.0003	0.921378		7.0004	0.925406		7.0004	0.924295		7.0004	0.884038		7.0003	0.923654		7.0004	0.909539		7.0004	0.915476
7.0504	0.920802		7.0504	0.925813		7.0504	0.924249		7.0504	0.922836		7.0504	0.917218		7.0504	0.925734		7.0504	0.926153		7.0504	0.919245		7.0504	0.920361		7.0504	0.920206		7.0504	0.925431		7.0504	0.923944		7.0504	0.922791		7.0504	0.887163		7.0503	0.923396		7.0504	0.90943		7.0504	0.919078
7.1004	0.922261		7.1004	0.925065		7.1004	0.922552		7.1004	0.92439		7.1004	0.923593		7.1004	0.924565		7.1004	0.927374		7.1004	0.924154		7.1004	0.919894		7.1004	0.9218		7.1004	0.921431		7.1004	0.925058		7.1004	0.922099		7.1004	0.885952		7.1003	0.924506		7.1004	0.906659		7.1004	0.920162
7.1504	0.920256		7.1504	0.925391		7.1504	0.920826		7.1504	0.922085		7.1504	0.920001		7.1504	0.923751		7.1504	0.925943		7.1504	0.92287		7.1504	0.918922		7.1504	0.921519		7.1504	0.921642		7.1504	0.927443		7.1504	0.924127		7.1504	0.88715		7.1504	0.924037		7.1504	0.905452		7.1504	0.918108
7.2004	0.921763		7.2004	0.92488		7.2004	0.921238		7.2004	0.922998		7.2004	0.918042		7.2004	0.9242		7.2004	0.924344		7.2004	0.919145		7.2004	0.918926		7.2004	0.924732		7.2004	0.918777		7.2004	0.924063		7.2004	0.925412		7.2004	0.882651		7.2004	0.923616		7.2004	0.906817		7.2004	0.919734
7.2504	0.918918		7.2504	0.923563		7.2504	0.924423		7.2504	0.926849		7.2504	0.917971		7.2504	0.922183		7.2504	0.925603		7.2504	0.922687		7.2504	0.920346		7.2504	0.919902		7.2504	0.921023		7.2504	0.924486		7.2504	0.922883		7.2504	0.881674		7.2504	0.923836		7.2504	0.905477		7.2504	0.917628
7.3004	0.919247		7.3004	0.926841		7.3004	0.922996		7.3004	0.92246		7.3004	0.920015		7.3004	0.924138		7.3004	0.926926		7.3004	0.920352		7.3004	0.9191		7.3004	0.920501		7.3004	0.923535		7.3004	0.925592		7.3004	0.923702		7.3004	0.884345		7.3004	0.923116		7.3004	0.907869		7.3004	0.919607
7.3504	0.921401		7.3504	0.92475		7.3504	0.922524		7.3504	0.920463		7.3504	0.918728		7.3504	0.922343		7.3504	0.924485		7.3504	0.921994		7.3504	0.918462		7.3504	0.919798		7.3504	0.917151		7.3504	0.925256		7.3504	0.923295		7.3504	0.885245		7.3504	0.926048		7.3504	0.907743		7.3504	0.918347
7.4004	0.920735		7.4004	0.922926		7.4004	0.923102		7.4004	0.920077		7.4004	0.91701		7.4004	0.923406		7.4004	0.929142		7.4004	0.920891		7.4004	0.921043		7.4004	0.918638		7.4004	0.918106		7.4004	0.921948		7.4004	0.922421		7.4004	0.888603		7.4004	0.922486		7.4004	0.904153		7.4004	0.916456
7.4504	0.922037		7.4504	0.923895		7.4504	0.922809		7.4504	0.923492		7.4504	0.919975		7.4504	0.923254		7.4504	0.925967		7.4504	0.91919		7.4504	0.920011		7.4504	0.921606		7.4504	0.919484		7.4504	0.921797		7.4504	0.922653		7.4504	0.885964		7.4504	0.923659		7.4504	0.907299		7.4504	0.915512
7.5004	0.922423		7.5004	0.921074		7.5004	0.918665		7.5004	0.924309		7.5004	0.918412		7.5004	0.921076		7.5004	0.927514		7.5004	0.919464		7.5004	0.915459		7.5004	0.918704		7.5004	0.919053		7.5004	0.922119		7.5004	0.922845		7.5004	0.883094		7.5004	0.923182		7.5004	0.90567		7.5004	0.916332
7.5504	0.922149		7.5504	0.924277		7.5504	0.920247		7.5504	0.925011		7.5504	0.916353		7.5504	0.922204		7.5504	0.926842		7.5504	0.923575		7.5504	0.921168		7.5504	0.918055		7.5504	0.919461		7.5504	0.920898		7.5504	0.921729		7.5504	0.881929		7.5504	0.923647		7.5504	0.906242		7.5504	0.918879
7.6004	0.922458		7.6004	0.926567		7.6004	0.921795		7.6005	0.923496		7.6004	0.920986		7.6004	0.922549		7.6004	0.926133		7.6004	0.919046		7.6004	0.918434		7.6004	0.919947		7.6004	0.919494		7.6004	0.922777		7.6004	0.921778		7.6004	0.883602		7.6004	0.92197		7.6004	0.906066		7.6004	0.917546
7.6504	0.920485		7.6504	0.925448		7.6504	0.924438		7.6505	0.924917		7.6504	0.916316		7.6504	0.923739		7.6504	0.923948		7.6504	0.921825		7.6504	0.921891		7.6504	0.921238		7.6504	0.919706		7.6504	0.91918		7.6504	0.921806		7.6504	0.879596		7.6504	0.924575		7.6504	0.906598		7.6504	0.917649
7.7005	0.917683		7.7004	0.920732		7.7004	0.923649		7.7005	0.920625		7.7004	0.918167		7.7004	0.923979		7.7004	0.928857		7.7005	0.921667		7.7004	0.920862		7.7004	0.921499		7.7004	0.917113		7.7004	0.922573		7.7004	0.922318		7.7004	0.877382		7.7004	0.923032		7.7004	0.905589		7.7004	0.916695
7.7505	0.919944		7.7504	0.921794		7.7504	0.921995		7.7505	0.923538		7.7505	0.917809		7.7504	0.922468		7.7504	0.922881		7.7505	0.921159		7.7504	0.91957		7.7504	0.919944		7.7504	0.918338		7.7504	0.920144		7.7504	0.919703		7.7504	0.881658		7.7504	0.9229		7.7504	0.906133		7.7504	0.919984
7.8005	0.919768		7.8004	0.925224		7.8004	0.924001		7.8005	0.922527		7.8005	0.917877		7.8004	0.921765		7.8004	0.924455		7.8005	0.918224		7.8004	0.91954		7.8004	0.919257		7.8004	0.917856		7.8005	0.920664		7.8004	0.921334		7.8004	0.884147		7.8004	0.921661		7.8004	0.905913		7.8004	0.915696
7.8505	0.917831		7.8504	0.927031		7.8504	0.923121		7.8505	0.924765		7.8505	0.916965		7.8504	0.921159		7.8504	0.924124		7.8505	0.916972		7.8505	0.917133		7.8504	0.916973		7.8504	0.915861		7.8505	0.924568		7.8504	0.920465		7.8504	0.882579		7.8504	0.92135		7.8504	0.905466		7.8504	0.917147
7.9005	0.919098		7.9004	0.921111		7.9004	0.925039		7.9005	0.925588		7.9005	0.915342		7.9004	0.92407		7.9004	0.92756		7.9005	0.922135		7.9005	0.918375		7.9004	0.919658		7.9004	0.917839		7.9005	0.922831		7.9004	0.91822		7.9004	0.883699		7.9004	0.920516		7.9005	0.901389		7.9004	0.916296
7.9505	0.917286		7.9504	0.922312		7.9504	0.920306		7.9505	0.922054		7.9505	0.919513		7.9504	0.921231		7.9504	0.926457		7.9505	0.921454		7.9505	0.918758		7.9504	0.919394		7.9504	0.918019		7.9505	0.921771		7.9505	0.917516		7.9504	0.880964		7.9504	0.923456		7.9505	0.904569		7.9504	0.918727
8.0005	0.920072		8.0004	0.922502		8.0004	0.92167		8.0005	0.921287		8.0005	0.916316		8.0004	0.920996		8.0004	0.926505		8.0005	0.920764		8.0005	0.918104		8.0004	0.921154		8.0004	0.915141		8.0005	0.922907		8.0005	0.921663		8.0004	0.880136		8.0004	0.9223		8.0005	0.904812		8.0004	0.915079
8.0505	0.920934		8.0504	0.923424		8.0504	0.922163		8.0505	0.922114		8.0505	0.913597		8.0504	0.922125		8.0504	0.922425		8.0505	0.920755		8.0505	0.917051		8.0504	0.918749		8.0504	0.91748		8.0505	0.9193		8.0505	0.919639		8.0504	0.877195		8.0504	0.919019		8.0505	0.903672		8.0504	0.916686
8.1005	0.918231		8.1004	0.918873		8.1004	0.920236		8.1005	0.922691		8.1005	0.91655		8.1004	0.922077		8.1004	0.926912		8.1005	0.919717		8.1005	0.916361		8.1004	0.919403		8.1004	0.915022		8.1005	0.921725		8.1005	0.922341		8.1004	0.881764		8.1004	0.918886		8.1005	0.906281		8.1004	0.919323
8.1505	0.918564		8.1504	0.92411		8.1504	0.9203		8.1505	0.921725		8.1505	0.913268		8.1504	0.919665		8.1504	0.922514		8.1505	0.919448		8.1505	0.9195		8.1504	0.91839		8.1504	0.91956		8.1505	0.922427		8.1505	0.921424		8.1504	0.877488		8.1504	0.918477		8.1505	0.905867		8.1504	0.917626
8.2005	0.918578		8.2004	0.922948		8.2004	0.921247		8.2005	0.921724		8.2005	0.916974		8.2004	0.921521		8.2004	0.925431		8.2005	0.918237		8.2005	0.916491		8.2004	0.916479		8.2004	0.916293		8.2005	0.918911		8.2005	0.917901		8.2004	0.882267		8.2004	0.922105		8.2005	0.903455		8.2004	0.916983
8.2505	0.918837		8.2504	0.921988		8.2504	0.919332		8.2505	0.923472		8.2505	0.914282		8.2504	0.921827		8.2504	0.925802		8.2505	0.917754		8.2505	0.916529		8.2504	0.919467		8.2504	0.918491		8.2505	0.922597		8.2505	0.919808		8.2504	0.885269		8.2504	0.922064		8.2505	0.903708		8.2504	0.915712
8.3005	0.916819		8.3004	0.920995		8.3004	0.918557		8.3005	0.920599		8.3005	0.913701		8.3004	0.918687		8.3004	0.926363		8.3005	0.918887		8.3005	0.91657		8.3004	0.916576		8.3004	0.919342		8.3005	0.922733		8.3005	0.922621		8.3004	0.88079		8.3004	0.9232		8.3005	0.901232		8.3004	0.916854
8.3505	0.920324		8.3504	0.923075		8.3504	0.920106		8.3505	0.921628		8.3505	0.916719		8.3504	0.921736		8.3504	0.922904		8.3505	0.92183		8.3505	0.918622		8.3504	0.915444		8.3504	0.918523		8.3505	0.921191		8.3505	0.921159		8.3504	0.873399		8.3504	0.919749		8.3505	0.905178		8.3504	0.912802
8.4005	0.91853		8.4004	0.92117		8.4004	0.918585		8.4005	0.921196		8.4005	0.913432		8.4004	0.921929		8.4004	0.924934		8.4005	0.91919		8.4005	0.915133		8.4004	0.918632		8.4004	0.915785		8.4005	0.921063		8.4005	0.921402		8.4004	0.880366		8.4004	0.921125		8.4005	0.904466		8.4004	0.918508
8.4505	0.920336		8.4505	0.921106		8.4504	0.919913		8.4505	0.918316		8.4505	0.917594		8.4504	0.921063		8.4504	0.924817		8.4505	0.920005		8.4505	0.915188		8.4504	0.917127		8.4504	0.915095		8.4505	0.919702		8.4505	0.922092		8.4504	0.882319		8.4504	0.920699		8.4505	0.905038		8.4504	0.919871
8.5005	0.919454		8.5005	0.921879		8.5004	0.921424		8.5005	0.921206		8.5005	0.915233		8.5004	0.922284		8.5004	0.92486		8.5005	0.91883		8.5005	0.917119		8.5004	0.917521		8.5004	0.917947		8.5005	0.918557		8.5005	0.918083		8.5004	0.875726		8.5004	0.920324		8.5005	0.904155		8.5005	0.916727
8.5505	0.918225		8.5505	0.920953		8.5504	0.920236		8.5505	0.921477		8.5505	0.913622		8.5505	0.921548		8.5504	0.928244		8.5505	0.919402		8.5505	0.914885		8.5504	0.914594		8.5504	0.914882		8.5505	0.917526		8.5505	0.918693		8.5504	0.875281		8.5504	0.920783		8.5505	0.902951		8.5505	0.914454
8.6005	0.917233		8.6005	0.9234		8.6004	0.919701		8.6005	0.9194		8.6005	0.913464		8.6005	0.920993		8.6004	0.923089		8.6005	0.917048		8.6005	0.917297		8.6004	0.916946		8.6004	0.9197		8.6005	0.918407		8.6005	0.918346		8.6004	0.875108		8.6004	0.919894		8.6005	0.901604		8.6005	0.914781
8.6505	0.915979		8.6505	0.920097		8.6505	0.917207		8.6505	0.920308		8.6505	0.916123		8.6505	0.920979		8.6504	0.922238		8.6505	0.916339		8.6505	0.917339		8.6504	0.920218		8.6504	0.913222		8.6505	0.91772		8.6505	0.917351		8.6504	0.873674		8.6504	0.920037		8.6505	0.898329		8.6505	0.917565
8.7005	0.917299		8.7005	0.920473		8.7005	0.921526		8.7005	0.921965		8.7005	0.914933		8.7005	0.922461		8.7005	0.924867		8.7005	0.919895		8.7005	0.916198		8.7005	0.917965		8.7004	0.916242		8.7005	0.917893		8.7005	0.918433		8.7004	0.884751		8.7004	0.919641		8.7005	0.899306		8.7005	0.91949
8.7505	0.918479		8.7505	0.919641		8.7505	0.919741		8.7505	0.91902		8.7505	0.912746		8.7505	0.921476		8.7505	0.924332		8.7505	0.916615		8.7505	0.915865		8.7505	0.916502		8.7504	0.91418		8.7505	0.920564		8.7505	0.919174		8.7505	0.884371		8.7504	0.919144		8.7505	0.903151		8.7505	0.916159
8.8005	0.918484		8.8005	0.918398		8.8005	0.920433		8.8005	0.918915		8.8005	0.91435		8.8005	0.920003		8.8005	0.924178		8.8005	0.916073		8.8005	0.916212		8.8005	0.917009		8.8004	0.91658		8.8005	0.919193		8.8005	0.91932		8.8005	0.878371		8.8004	0.920864		8.8005	0.900722		8.8005	0.914889
8.8505	0.917789		8.8505	0.919036		8.8505	0.919516		8.8505	0.920059		8.8505	0.914688		8.8505	0.921962		8.8505	0.924048		8.8505	0.91892		8.8505	0.913697		8.8505	0.918642		8.8504	0.912976		8.8505	0.918594		8.8505	0.917148		8.8505	0.877335		8.8504	0.921309		8.8505	0.90236		8.8505	0.915986
8.9005	0.916164		8.9005	0.918039		8.9005	0.914913		8.9005	0.919878		8.9005	0.913832		8.9005	0.91831		8.9005	0.921167		8.9005	0.920267		8.9005	0.915073		8.9005	0.916596		8.9005	0.915253		8.9005	0.92208		8.9005	0.914817		8.9005	0.866605		8.9004	0.921389		8.9005	0.900935		8.9005	0.917297
8.9505	0.918159		8.9505	0.918876		8.9505	0.921655		8.9505	0.921714		8.9505	0.916651		8.9505	0.919911		8.9505	0.921022		8.9505	0.916516		8.9505	0.915853		8.9505	0.913925		8.9505	0.915583		8.9505	0.921987		8.9505	0.918161		8.9505	0.879426		8.9505	0.917421		8.9505	0.903061		8.9505	0.916292
9.0005	0.917525		9.0005	0.917355		9.0005	0.918496		9.0005	0.916465		9.0005	0.913046		9.0005	0.921855		9.0005	0.92421		9.0005	0.918833		9.0005	0.916567		9.0005	0.914481		9.0005	0.915855		9.0005	0.917362		9.0005	0.918153		9.0005	0.871569		9.0005	0.919631		9.0005	0.902579		9.0005	0.913468
9.0505	0.917065		9.0505	0.921868		9.0505	0.918913		9.0505	0.917562		9.0505	0.914987		9.0505	0.920376		9.0505	0.921336		9.0505	0.916379		9.0505	0.914141		9.0505	0.914821		9.0505	0.914916		9.0505	0.919479		9.0505	0.918541		9.0505	0.880703		9.0505	0.918098		9.0505	0.901211		9.0505	0.913524
9.1005	0.91763		9.1005	0.92075		9.1005	0.921488		9.1005	0.918312		9.1005	0.913548		9.1005	0.920274		9.1005	0.923385		9.1005	0.916865		9.1005	0.916908		9.1005	0.919746		9.1005	0.91476		9.1005	0.917451		9.1005	0.917423		9.1005	0.874243		9.1005	0.918188		9.1005	0.899796		9.1005	0.914655
9.1505	0.916235		9.1505	0.920009		9.1505	0.917514		9.1505	0.917663		9.1505	0.912228		9.1505	0.920277		9.1505	0.923156		9.1505	0.917547		9.1505	0.914272		9.1505	0.918433		9.1505	0.912137		9.1505	0.920372		9.1505	0.917544		9.1505	0.875831		9.1505	0.917941		9.1505	0.901117		9.1505	0.915837
9.2005	0.916842		9.2005	0.918296		9.2005	0.920603		9.2005	0.920185		9.2005	0.91401		9.2005	0.920659		9.2005	0.924646		9.2005	0.919174		9.2005	0.914506		9.2005	0.914615		9.2005	0.912499		9.2005	0.91658		9.2005	0.920781		9.2005	0.872762		9.2005	0.916145		9.2005	0.901109		9.2005	0.916287
9.2505	0.918538		9.2505	0.917427		9.2505	0.918373		9.2505	0.917812		9.2505	0.913055		9.2505	0.919457		9.2505	0.922951		9.2505	0.915144		9.2505	0.916421		9.2505	0.916074		9.2505	0.914995		9.2505	0.915951		9.2505	0.915931		9.2505	0.87785		9.2505	0.916747		9.2505	0.89843		9.2505	0.913795
9.3005	0.917435		9.3005	0.919554		9.3005	0.913427		9.3005	0.916646		9.3005	0.914022		9.3005	0.919217		9.3005	0.925702		9.3005	0.915186		9.3005	0.915423		9.3005	0.914799		9.3005	0.913788		9.3005	0.918427		9.3005	0.916398		9.3005	0.878343		9.3005	0.919478		9.3005	0.899387		9.3005	0.916288
9.3505	0.916586		9.3505	0.921482		9.3505	0.919342		9.3505	0.919359		9.3505	0.914993		9.3505	0.918084		9.3505	0.922759		9.3505	0.914675		9.3505	0.911788		9.3505	0.915816		9.3505	0.91616		9.3505	0.916413		9.3505	0.914684		9.3505	0.876019		9.3505	0.921627		9.3505	0.899133		9.3505	0.914835
9.4005	0.918045		9.4005	0.919815		9.4005	0.919157		9.4006	0.918615		9.4005	0.913267		9.4005	0.920602		9.4005	0.921412		9.4005	0.915307		9.4005	0.912663		9.4005	0.913181		9.4005	0.91419		9.4005	0.917803		9.4005	0.918526		9.4005	0.876255		9.4005	0.921932		9.4005	0.902675		9.4005	0.915749
9.4505	0.91624		9.4505	0.920734		9.4505	0.917025		9.4506	0.917915		9.4505	0.911489		9.4505	0.920622		9.4505	0.922797		9.4505	0.91732		9.4505	0.91249		9.4505	0.913638		9.4505	0.914809		9.4505	0.916348		9.4505	0.919078		9.4505	0.87765		9.4505	0.919184		9.4505	0.895715		9.4505	0.914651
9.5006	0.917022		9.5005	0.917681		9.5005	0.915535		9.5006	0.916401		9.5005	0.912645		9.5005	0.918953		9.5005	0.920443		9.5006	0.915866		9.5005	0.916585		9.5005	0.918189		9.5005	0.916007		9.5005	0.916365		9.5005	0.917238		9.5005	0.873903		9.5005	0.918683		9.5005	0.899416		9.5005	0.913769
9.5506	0.916723		9.5505	0.918148		9.5505	0.917424		9.5506	0.916686		9.5505	0.911659		9.5505	0.919774		9.5505	0.924382		9.5506	0.913775		9.5505	0.914403		9.5505	0.914209		9.5505	0.913499		9.5505	0.915951		9.5505	0.920125		9.5505	0.872955		9.5505	0.918419		9.5505	0.898743		9.5505	0.913094
9.6006	0.917234		9.6005	0.916463		9.6005	0.915386		9.6006	0.918506		9.6006	0.910819		9.6005	0.919157		9.6005	0.919346		9.6006	0.914587		9.6005	0.913627		9.6005	0.915366		9.6005	0.912904		9.6006	0.920242		9.6005	0.917262		9.6005	0.87471		9.6005	0.919899		9.6005	0.899218		9.6005	0.913542
9.6506	0.91705		9.6505	0.91802		9.6505	0.917756		9.6506	0.917539		9.6506	0.913595		9.6505	0.918922		9.6505	0.923999		9.6506	0.917743		9.6505	0.91188		9.6505	0.913332		9.6505	0.913777		9.6506	0.919155		9.6505	0.914569		9.6505	0.877655		9.6505	0.91735		9.6505	0.89948		9.6505	0.915577
9.7006	0.915731		9.7005	0.91957		9.7005	0.914698		9.7006	0.917436		9.7006	0.91424		9.7005	0.920141		9.7005	0.922628		9.7006	0.916816		9.7006	0.915184		9.7005	0.914162		9.7005	0.913753		9.7006	0.916898		9.7005	0.914667		9.7005	0.872691		9.7005	0.916904		9.7005	0.897547		9.7005	0.915044
9.7506	0.917363		9.7505	0.918288		9.7505	0.91626		9.7506	0.917643		9.7506	0.914344		9.7505	0.91927		9.7505	0.922618		9.7506	0.915143		9.7506	0.914583		9.7505	0.916896		9.7505	0.91473		9.7506	0.915874		9.7505	0.919487		9.7505	0.875289		9.7505	0.918164		9.7506	0.896464		9.7505	0.913839
9.8006	0.918611		9.8005	0.916163		9.8005	0.919355		9.8006	0.917054		9.8006	0.915242		9.8005	0.918273		9.8005	0.921919		9.8006	0.916564		9.8006	0.913632		9.8005	0.912435		9.8005	0.914661		9.8006	0.916376		9.8006	0.917243		9.8005	0.871617		9.8005	0.912448		9.8006	0.896426		9.8005	0.915451
9.8506	0.914187		9.8505	0.920414		9.8505	0.916417		9.8506	0.919096		9.8506	0.912929		9.8505	0.919592		9.8505	0.922156		9.8506	0.917098		9.8506	0.91371		9.8505	0.91613		9.8505	0.914739		9.8506	0.914951		9.8506	0.916024		9.8505	0.87286		9.8505	0.916543		9.8506	0.90083		9.8505	0.91471
9.9006	0.916565		9.9005	0.917229		9.9005	0.920369		9.9006	0.917773		9.9006	0.912711		9.9005	0.917917		9.9005	0.925212		9.9006	0.91314		9.9006	0.910994		9.9005	0.917364		9.9005	0.912188		9.9006	0.916494		9.9006	0.915072		9.9005	0.870254		9.9005	0.914602		9.9006	0.895353		9.9005	0.912141
9.9506	0.915092		9.9505	0.917181		9.9505	0.915578		9.9506	0.915446		9.9506	0.916258		9.9505	0.918778		9.9505	0.922175		9.9506	0.914042		9.9506	0.913051		9.9505	0.91597		9.9505	0.912948		9.9506	0.917847		9.9506	0.91648		9.9505	0.873709		9.9505	0.916592		9.9506	0.898939		9.9505	0.915958
10.0006	0.917016		10.0005	0.916621		10.0005	0.91546		10.0006	0.91691		10.0006	0.913276		10.0005	0.920704		10.0005	0.92252		10.0006	0.91602		10.0006	0.910336		10.0005	0.915486		10.0005	0.914448		10.0006	0.917349		10.0006	0.91624		10.0005	0.875336		10.0005	0.916992		10.0006	0.893438		10.0005	0.914841
10.0506	0.915293		10.0505	0.919664		10.0505	0.917852		10.0506	0.916794		10.0506	0.912028		10.0505	0.917258		10.0505	0.925515		10.0506	0.914418		10.0506	0.915043		10.0505	0.913094		10.0505	0.913183		10.0506	0.91378		10.0506	0.914596		10.0505	0.873872		10.0505	0.916346		10.0506	0.899748		10.0505	0.913176
10.1006	0.913457		10.1005	0.917244		10.1005	0.914707		10.1006	0.918339		10.1006	0.912142		10.1005	0.920989		10.1005	0.925234		10.1006	0.916936		10.1006	0.911274		10.1005	0.914202		10.1005	0.912199		10.1006	0.915919		10.1006	0.914595		10.1005	0.869027		10.1005	0.918506		10.1006	0.899456		10.1005	0.914942
10.1506	0.915697		10.1505	0.919051		10.1505	0.916276		10.1506	0.916133		10.1506	0.910325		10.1505	0.917317		10.1505	0.922355		10.1506	0.916037		10.1506	0.911838		10.1505	0.912961		10.1505	0.91255		10.1506	0.916091		10.1506	0.91418		10.1505	0.869582		10.1505	0.915829		10.1506	0.895867		10.1505	0.916044
10.2006	0.915115		10.2005	0.918077		10.2005	0.917504		10.2006	0.914072		10.2006	0.910141		10.2005	0.918589		10.2005	0.920676		10.2006	0.914476		10.2006	0.91216		10.2005	0.913193		10.2005	0.91372		10.2006	0.917651		10.2006	0.914848		10.2005	0.878597		10.2005	0.917516		10.2006	0.89825		10.2005	0.91163
10.2506	0.916297		10.2505	0.914621		10.2505	0.917757		10.2506	0.916851		10.2506	0.911632		10.2505	0.915925		10.2505	0.922325		10.2506	0.914211		10.2506	0.912645		10.2505	0.913341		10.2505	0.911976		10.2506	0.916266		10.2506	0.916107		10.2505	0.871637		10.2505	0.917663		10.2506	0.89618		10.2505	0.914951
10.3006	0.91727		10.3006	0.917894		10.3005	0.917233		10.3006	0.916662		10.3006	0.910683		10.3005	0.918985		10.3005	0.920413		10.3006	0.914435		10.3006	0.911796		10.3005	0.911559		10.3005	0.911948		10.3006	0.91593		10.3006	0.915515		10.3005	0.872227		10.3005	0.914207		10.3006	0.895375		10.3005	0.913428
10.3506	0.9158		10.3506	0.920125		10.3505	0.915473		10.3506	0.916436		10.3506	0.910049		10.3505	0.918451		10.3505	0.921954		10.3506	0.912231		10.3506	0.90935		10.3505	0.910746		10.3505	0.913316		10.3506	0.914247		10.3506	0.913475		10.3505	0.868788		10.3505	0.917798		10.3506	0.895824		10.3506	0.916419
10.4006	0.914479		10.4006	0.919158		10.4005	0.918501		10.4006	0.917427		10.4006	0.910685		10.4006	0.91849		10.4005	0.923489		10.4006	0.912716		10.4006	0.910905		10.4005	0.913065		10.4005	0.911398		10.4006	0.914635		10.4006	0.913417		10.4005	0.87225		10.4005	0.917036		10.4006	0.897429		10.4006	0.916638
10.4506	0.914967		10.4506	0.916017		10.4506	0.916791		10.4506	0.915484		10.4506	0.90756		10.4506	0.916818		10.4505	0.923101		10.4506	0.913672		10.4506	0.913538		10.4505	0.913279		10.4505	0.913923		10.4506	0.916807		10.4506	0.913961		10.4505	0.872457		10.4505	0.91624		10.4506	0.896248		10.4506	0.91343
10.5006	0.914414		10.5006	0.915341		10.5006	0.920637		10.5006	0.915688		10.5006	0.911565		10.5006	0.918489		10.5005	0.919016		10.5006	0.914574		10.5006	0.9107		10.5006	0.912609		10.5005	0.913202		10.5006	0.916224		10.5006	0.916321		10.5005	0.871598		10.5005	0.917228		10.5006	0.895892		10.5006	0.913112
10.5506	0.914085		10.5506	0.916192		10.5506	0.916721		10.5506	0.915494		10.5506	0.911774		10.5506	0.917943		10.5506	0.918649		10.5506	0.911691		10.5506	0.910083		10.5506	0.914874		10.5505	0.912582		10.5506	0.913931		10.5506	0.912135		10.5505	0.871952		10.5505	0.916165		10.5506	0.892607		10.5506	0.911393
10.6006	0.915049		10.6006	0.91443		10.6006	0.916095		10.6006	0.915638		10.6006	0.914095		10.6006	0.918285		10.6006	0.921733		10.6006	0.913666		10.6006	0.911867		10.6006	0.911332		10.6005	0.913061		10.6006	0.917042		10.6006	0.917703		10.6006	0.875287		10.6005	0.91452		10.6006	0.894185		10.6006	0.912746
10.6506	0.914449		10.6506	0.916089		10.6506	0.918343		10.6506	0.91612		10.6506	0.913889		10.6506	0.919457		10.6506	0.920313		10.6506	0.914316		10.6506	0.913018		10.6506	0.912437		10.6505	0.910255		10.6506	0.915421		10.6506	0.913786		10.6506	0.873902		10.6505	0.916183		10.6506	0.895892		10.6506	0.914747
10.7006	0.913078		10.7006	0.918108		10.7006	0.914562		10.7006	0.915607		10.7006	0.913736		10.7006	0.919212		10.7006	0.924546		10.7006	0.910859		10.7006	0.911855		10.7006	0.913463		10.7006	0.914242		10.7006	0.919139		10.7006	0.915354		10.7006	0.867607		10.7005	0.914147		10.7006	0.895299		10.7006	0.911683
10.7506	0.915431		10.7506	0.916296		10.7506	0.916976		10.7506	0.91648		10.7506	0.912078		10.7506	0.917906		10.7506	0.920129		10.7506	0.914235		10.7506	0.912832		10.7506	0.912848		10.7506	0.910556		10.7506	0.913341		10.7506	0.911859		10.7506	0.874051		10.7505	0.917154		10.7506	0.897794		10.7506	0.913264
10.8006	0.917266		10.8006	0.915737		10.8006	0.917578		10.8006	0.916251		10.8006	0.911088		10.8006	0.919429		10.8006	0.921971		10.8006	0.913956		10.8006	0.912171		10.8006	0.910797		10.8006	0.914383		10.8006	0.913736		10.8006	0.912219		10.8006	0.869543		10.8006	0.916165		10.8006	0.895634		10.8006	0.914989
10.8506	0.911906		10.8506	0.917397		10.8506	0.914207		10.8506	0.915811		10.8506	0.910146		10.8506	0.916373		10.8506	0.923565		10.8506	0.912711		10.8506	0.912224		10.8506	0.912399		10.8506	0.909679		10.8506	0.916181		10.8506	0.915168		10.8506	0.875703		10.8506	0.915012		10.8506	0.896801		10.8506	0.912655
10.9006	0.913698		10.9006	0.91878		10.9006	0.915237		10.9006	0.915254		10.9006	0.909882		10.9006	0.919805		10.9006	0.922629		10.9006	0.912112		10.9006	0.913149		10.9006	0.912301		10.9006	0.912476		10.9006	0.916097		10.9006	0.913965		10.9006	0.875029		10.9006	0.91422		10.9006	0.899945		10.9006	0.911031
10.9506	0.913953		10.9506	0.917865		10.9506	0.91865		10.9506	0.914144		10.9506	0.907273		10.9506	0.915659		10.9506	0.921018		10.9506	0.912114		10.9506	0.913077		10.9506	0.91214		10.9506	0.910768		10.9506	0.916555		10.9506	0.914363		10.9506	0.863905		10.9506	0.914674		10.9506	0.892974		10.9506	0.911941
11.0006	0.916704		11.0006	0.914935		11.0006	0.914778		11.0006	0.915181		11.0006	0.908578		11.0006	0.917265		11.0006	0.919467		11.0006	0.913359		11.0006	0.913274		11.0006	0.913833		11.0006	0.91098		11.0006	0.914271		11.0006	0.915493		11.0006	0.874271		11.0006	0.914002		11.0006	0.897141		11.0006	0.91458
11.0506	0.913471		11.0506	0.917299		11.0506	0.916935		11.0506	0.915184		11.0506	0.909978		11.0506	0.918401		11.0506	0.91762		11.0506	0.913188		11.0506	0.912665		11.0506	0.91073		11.0506	0.910678		11.0506	0.91401		11.0506	0.912789		11.0506	0.870864		11.0506	0.914367		11.0506	0.896402		11.0506	0.912008
11.1006	0.91538		11.1006	0.916315		11.1006	0.916715		11.1006	0.915761		11.1006	0.910556		11.1006	0.919796		11.1006	0.920446		11.1006	0.912864		11.1006	0.909969		11.1006	0.911568		11.1006	0.912301		11.1006	0.912074		11.1006	0.914145		11.1006	0.870415		11.1006	0.915712		11.1006	0.892666		11.1006	0.915315
11.1506	0.915269		11.1506	0.917151		11.1506	0.916207		11.1506	0.915935		11.1506	0.909835		11.1506	0.916647		11.1506	0.923097		11.1506	0.912239		11.1506	0.910577		11.1506	0.911516		11.1506	0.909253		11.1506	0.913051		11.1506	0.915006		11.1506	0.872507		11.1506	0.914363		11.1506	0.89242		11.1506	0.914933
11.2006	0.915664		11.2006	0.91523		11.2006	0.914837		11.2007	0.913943		11.2006	0.910807		11.2006	0.917375		11.2006	0.923167		11.2006	0.911201		11.2006	0.910633		11.2006	0.911808		11.2006	0.909525		11.2006	0.914646		11.2006	0.914878		11.2006	0.871142		11.2006	0.914193		11.2006	0.893298		11.2006	0.911767
11.2506	0.91413		11.2506	0.916323		11.2506	0.917214		11.2507	0.914221		11.2506	0.909306		11.2506	0.915805		11.2506	0.920433		11.2506	0.910369		11.2506	0.913034		11.2506	0.909756		11.2506	0.910987		11.2506	0.911736		11.2506	0.914568		11.2506	0.869127		11.2506	0.917844		11.2506	0.892768		11.2506	0.911398
11.3006	0.914627		11.3006	0.916663		11.3006	0.915398		11.3007	0.911738		11.3006	0.908059		11.3006	0.919366		11.3006	0.922279		11.3006	0.910851		11.3006	0.908009		11.3006	0.911808		11.3006	0.907422		11.3006	0.916676		11.3006	0.912467		11.3006	0.873467		11.3006	0.915477		11.3006	0.893229		11.3006	0.913236
11.3507	0.915835		11.3506	0.913352		11.3506	0.915992		11.3507	0.914522		11.3506	0.910909		11.3506	0.91628		11.3506	0.918381		11.3507	0.911483		11.3506	0.908659		11.3506	0.913543		11.3506	0.909733		11.3506	0.915769		11.3506	0.916218		11.3506	0.868413		11.3506	0.915684		11.3506	0.892192		11.3506	0.910658
11.4007	0.914282		11.4006	0.915477		11.4006	0.915059		11.4007	0.91206		11.4006	0.909841		11.4006	0.915682		11.4006	0.917473		11.4007	0.912906		11.4006	0.909031		11.4006	0.914295		11.4006	0.910254		11.4006	0.912775		11.4006	0.912615		11.4006	0.873956		11.4006	0.918184		11.4006	0.895582		11.4006	0.909606
11.4507	0.914088		11.4506	0.912689		11.4506	0.916803		11.4507	0.914398		11.4507	0.906258		11.4506	0.916835		11.4506	0.919302		11.4507	0.90958		11.4506	0.911303		11.4506	0.910695		11.4506	0.912298		11.4507	0.916969		11.4506	0.911785		11.4506	0.869287		11.4506	0.914778		11.4506	0.895395		11.4506	0.912512
11.5007	0.914627		11.5006	0.917284		11.5006	0.914634		11.5007	0.91406		11.5007	0.907325		11.5006	0.916044		11.5006	0.919841		11.5007	0.914473		11.5006	0.910477		11.5006	0.91133		11.5006	0.911636		11.5007	0.9149		11.5006	0.912247		11.5006	0.868755		11.5006	0.915649		11.5006	0.894531		11.5006	0.913155
11.5507	0.916666		11.5506	0.916415		11.5506	0.914343		11.5507	0.914292		11.5507	0.908161		11.5506	0.917412		11.5506	0.920748		11.5507	0.912589		11.5507	0.911327		11.5506	0.910053		11.5506	0.911623		11.5507	0.911964		11.5506	0.910985		11.5506	0.866203		11.5506	0.915179		11.5506	0.896143		11.5506	0.910944
11.6007	0.912917		11.6006	0.914334		11.6006	0.914995		11.6007	0.911773		11.6007	0.910348		11.6006	0.91423		11.6006	0.919662		11.6007	0.91056		11.6007	0.913967		11.6006	0.910362		11.6006	0.908192		11.6007	0.91189		11.6006	0.915192		11.6006	0.867491		11.6006	0.916369		11.6007	0.889876		11.6006	0.914499
11.6507	0.91546		11.6506	0.914173		11.6506	0.917944		11.6507	0.914418		11.6507	0.911346		11.6506	0.915649		11.6506	0.918406		11.6507	0.911018		11.6507	0.909719		11.6506	0.911274		11.6506	0.911507		11.6507	0.915508		11.6507	0.912836		11.6506	0.859794		11.6506	0.912749		11.6507	0.887711		11.6506	0.912054
11.7007	0.912684		11.7006	0.915612		11.7006	0.917326		11.7007	0.911498		11.7007	0.908234		11.7006	0.917195		11.7006	0.919085		11.7007	0.909717		11.7007	0.910337		11.7006	0.910644		11.7006	0.910697		11.7007	0.914873		11.7007	0.911594		11.7006	0.869068		11.7006	0.915119		11.7007	0.892606		11.7006	0.911628
11.7507	0.91263		11.7506	0.916061		11.7506	0.9153		11.7507	0.913611		11.7507	0.909153		11.7506	0.916009		11.7506	0.917964		11.7507	0.912044		11.7507	0.909472		11.7506	0.912006		11.7506	0.910519		11.7507	0.914972		11.7507	0.914539		11.7506	0.872206		11.7506	0.913342		11.7507	0.893805		11.7506	0.910017
11.8007	0.914317		11.8006	0.915717		11.8006	0.91569		11.8007	0.910137		11.8007	0.908052		11.8006	0.916204		11.8006	0.919343		11.8007	0.910266		11.8007	0.911482		11.8006	0.912848		11.8006	0.910899		11.8007	0.915356		11.8007	0.914511		11.8006	0.866028		11.8006	0.912144		11.8007	0.895947		11.8006	0.914493
11.8507	0.914552		11.8506	0.912938		11.8506	0.913506		11.8507	0.912768		11.8507	0.907976		11.8506	0.916173		11.8506	0.919007		11.8507	0.910453		11.8507	0.909134		11.8506	0.911695		11.8506	0.912055		11.8507	0.91377		11.8507	0.913986		11.8506	0.864452		11.8506	0.916912		11.8507	0.894084		11.8506	0.914062
11.9007	0.913383		11.9006	0.915837		11.9006	0.916656		11.9007	0.910748		11.9007	0.90909		11.9006	0.916046		11.9006	0.921709		11.9007	0.908338		11.9007	0.909299		11.9006	0.909413		11.9006	0.912114		11.9007	0.911814		11.9007	0.913531		11.9006	0.867981		11.9006	0.914636		11.9007	0.894935		11.9006	0.91207
11.9507	0.911789		11.9506	0.915375		11.9506	0.915989		11.9507	0.913229		11.9507	0.909301		11.9506	0.917516		11.9506	0.9178		11.9507	0.909645		11.9507	0.912153		11.9506	0.912213		11.9506	0.913027		11.9507	0.913077		11.9507	0.910743		11.9506	0.867618		11.9506	0.914413		11.9507	0.892835		11.9506	0.912941
12.0007	0.913429		12.0006	0.913972		12.0006	0.915475		12.0007	0.91375		12.0007	0.907615		12.0006	0.914142		12.0006	0.921028		12.0007	0.911999		12.0007	0.908355		12.0006	0.909939		12.0006	0.908848		12.0007	0.914168		12.0007	0.912664		12.0006	0.862481		12.0006	0.912571		12.0007	0.890958		12.0006	0.913515
12.0507	0.914268		12.0506	0.914822		12.0506	0.915155		12.0507	0.913002		12.0507	0.910834		12.0506	0.915874		12.0506	0.920696		12.0507	0.911925		12.0507	0.905395		12.0506	0.909125		12.0506	0.912177		12.0507	0.910499		12.0507	0.914587		12.0506	0.869158		12.0506	0.916091		12.0507	0.894164		12.0506	0.912546
12.1007	0.914383		12.1006	0.9153		12.1006	0.916552		12.1007	0.913416		12.1007	0.906553		12.1006	0.915132		12.1006	0.921985		12.1007	0.907136		12.1007	0.909848		12.1006	0.908043		12.1006	0.911063		12.1007	0.910888		12.1007	0.910529		12.1006	0.862499		12.1006	0.91467		12.1007	0.890836		12.1006	0.914332
12.1507	0.915465		12.1507	0.914687		12.1506	0.915701		12.1507	0.912149		12.1507	0.906575		12.1506	0.915871		12.1506	0.919964		12.1507	0.913145		12.1507	0.909439		12.1506	0.910208		12.1506	0.908411		12.1507	0.911143		12.1507	0.914116		12.1506	0.873634		12.1506	0.916038		12.1507	0.890158		12.1507	0.912726
12.2007	0.911192		12.2007	0.913913		12.2006	0.913043		12.2007	0.913071		12.2007	0.909814		12.2006	0.916773		12.2006	0.919814		12.2007	0.909551		12.2007	0.909762		12.2006	0.909285		12.2006	0.910095		12.2007	0.915307		12.2007	0.911555		12.2006	0.874378		12.2006	0.910881		12.2007	0.890819		12.2007	0.909126
12.2507	0.913393		12.2507	0.91394		12.2506	0.91462		12.2507	0.912978		12.2507	0.906846		12.2507	0.915004		12.2506	0.917879		12.2507	0.910712		12.2507	0.908224		12.2506	0.909925		12.2506	0.907482		12.2507	0.911122		12.2507	0.91336		12.2506	0.871525		12.2506	0.916227		12.2507	0.891401		12.2507	0.910853
12.3007	0.910634		12.3007	0.913534		12.3007	0.913419		12.3007	0.914781		12.3007	0.908084		12.3007	0.914996		12.3006	0.921749		12.3007	0.912651		12.3007	0.906039		12.3006	0.91169		12.3006	0.909504		12.3007	0.912708		12.3007	0.911652		12.3006	0.860744		12.3006	0.913614		12.3007	0.894621		12.3007	0.913998
12.3507	0.91247		12.3507	0.912291		12.3507	0.91331		12.3507	0.914434		12.3507	0.909948		12.3507	0.915864		12.3507	0.921283		12.3507	0.908148		12.3507	0.906201		12.3507	0.908882		12.3506	0.910066		12.3507	0.914485		12.3507	0.914561		12.3506	0.862727		12.3506	0.912749		12.3507	0.891706		12.3507	0.910055
12.4007	0.911432		12.4007	0.917674		12.4007	0.914876		12.4007	0.910591		12.4007	0.907716		12.4007	0.9167		12.4007	0.919432		12.4007	0.911202		12.4007	0.909254		12.4007	0.909571		12.4006	0.907267		12.4007	0.91067		12.4007	0.912577		12.4006	0.862679		12.4006	0.913599		12.4007	0.892803		12.4007	0.912985
12.4507	0.912761		12.4507	0.913182		12.4507	0.914871		12.4507	0.912739		12.4507	0.90896		12.4507	0.915544		12.4507	0.923056		12.4507	0.910163		12.4507	0.909304		12.4507	0.911892		12.4506	0.910964		12.4507	0.912263		12.4507	0.911774		12.4507	0.868726		12.4506	0.911758		12.4507	0.889391		12.4507	0.913552
12.5007	0.910362		12.5007	0.914822		12.5007	0.917487		12.5007	0.913346		12.5007	0.908932		12.5007	0.916191		12.5007	0.920477		12.5007	0.908993		12.5007	0.906668		12.5007	0.910004		12.5006	0.907186		12.5007	0.914659		12.5007	0.910948		12.5007	0.86431		12.5006	0.913837		12.5007	0.892245		12.5007	0.912708
12.5507	0.911011		12.5507	0.915522		12.5507	0.914391		12.5507	0.911555		12.5507	0.908123		12.5507	0.914709		12.5507	0.920382		12.5507	0.908894		12.5507	0.908944		12.5507	0.912228		12.5507	0.912193		12.5507	0.912673		12.5507	0.91304		12.5507	0.867665		12.5506	0.914302		12.5507	0.893638		12.5507	0.912949
12.6007	0.912441		12.6007	0.913645		12.6007	0.914587		12.6007	0.912646		12.6007	0.906655		12.6007	0.915171		12.6007	0.920524		12.6007	0.911043		12.6007	0.90735		12.6007	0.906813		12.6007	0.909406		12.6007	0.91454		12.6007	0.912831		12.6007	0.872519		12.6007	0.913902		12.6007	0.891897		12.6007	0.912798
12.6507	0.912244		12.6507	0.91509		12.6507	0.914628		12.6507	0.911891		12.6507	0.907908		12.6507	0.916224		12.6507	0.91933		12.6507	0.909718		12.6507	0.90797		12.6507	0.907144		12.6507	0.909912		12.6507	0.911723		12.6507	0.909759		12.6507	0.868659		12.6507	0.914291		12.6507	0.893964		12.6507	0.913598
12.7007	0.915099		12.7007	0.912827		12.7007	0.913133		12.7007	0.91302		12.7007	0.907236		12.7007	0.912945		12.7007	0.919732		12.7007	0.908556		12.7007	0.906793		12.7007	0.907589		12.7007	0.910626		12.7007	0.914892		12.7007	0.913908		12.7007	0.86246		12.7007	0.913026		12.7007	0.8927		12.7007	0.911779
12.7507	0.914807		12.7507	0.91531		12.7507	0.91683		12.7507	0.913864		12.7507	0.908543		12.7507	0.918439		12.7507	0.91827		12.7507	0.910087		12.7507	0.907691		12.7507	0.911784		12.7507	0.908878		12.7507	0.913116		12.7507	0.913354		12.7507	0.862823		12.7507	0.911291		12.7507	0.889261		12.7507	0.912218
12.8007	0.912702		12.8007	0.912578		12.8007	0.916862		12.8007	0.912197		12.8007	0.908239		12.8007	0.913775		12.8007	0.918483		12.8007	0.909812		12.8007	0.906139		12.8007	0.907905		12.8007	0.911704		12.8007	0.91307		12.8007	0.910454		12.8007	0.862895		12.8007	0.913386		12.8007	0.892262		12.8007	0.911606
12.8507	0.912194		12.8507	0.914405		12.8507	0.915556		12.8507	0.910999		12.8507	0.906959		12.8507	0.912973		12.8507	0.919838		12.8507	0.911776		12.8507	0.91009		12.8507	0.911328		12.8507	0.910191		12.8507	0.913893		12.8507	0.910468		12.8507	0.868639		12.8507	0.913162		12.8507	0.890081		12.8507	0.91179
12.9007	0.914568		12.9007	0.914765		12.9007	0.9144		12.9007	0.912602		12.9007	0.906439		12.9007	0.916017		12.9007	0.91844		12.9007	0.909535		12.9007	0.908424		12.9007	0.908619		12.9007	0.909419		12.9007	0.908774		12.9007	0.910636		12.9007	0.864936		12.9007	0.914513		12.9007	0.891186		12.9007	0.910964
12.9507	0.911492		12.9507	0.912615		12.9507	0.913391		12.9507	0.911413		12.9507	0.907986		12.9507	0.913333		12.9507	0.922211		12.9507	0.911281		12.9507	0.909716		12.9507	0.908309		12.9507	0.90994		12.9507	0.909703		12.9507	0.912045		12.9507	0.865974		12.9507	0.914218		12.9507	0.893098		12.9507	0.910254
13.0007	0.911052		13.0007	0.912739		13.0007	0.916816		13.0007	0.91007		13.0007	0.90848		13.0007	0.913334		13.0007	0.919038		13.0007	0.907076		13.0007	0.90555		13.0007	0.907144		13.0007	0.907796		13.0007	0.91224		13.0007	0.91016		13.0007	0.863544		13.0007	0.91197		13.0007	0.893188		13.0007	0.914665
13.0507	0.914242		13.0507	0.91268		13.0507	0.912565		13.0507	0.912852		13.0507	0.907201		13.0507	0.913734		13.0507	0.923317		13.0507	0.907731		13.0507	0.909106		13.0507	0.908399		13.0507	0.908884		13.0507	0.91057		13.0507	0.910473		13.0507	0.865299		13.0507	0.911607		13.0507	0.887823		13.0507	0.910794
13.1007	0.914112		13.1007	0.912361		13.1007	0.911618		13.1008	0.911907		13.1007	0.90824		13.1007	0.913149		13.1007	0.920093		13.1007	0.908464		13.1007	0.906479		13.1007	0.906444		13.1007	0.908192		13.1007	0.912897		13.1007	0.911774		13.1007	0.867215		13.1007	0.913201		13.1007	0.8899		13.1007	0.910512
13.1508	0.910425		13.1507	0.911599		13.1507	0.915355		13.1508	0.912248		13.1507	0.903601		13.1507	0.914615		13.1507	0.922541		13.1507	0.906922		13.1507	0.907003		13.1507	0.910006		13.1507	0.907931		13.1507	0.912946		13.1507	0.913025		13.1507	0.865391		13.1507	0.910946		13.1507	0.889551		13.1507	0.909484
13.2008	0.910388		13.2007	0.911897		13.2007	0.91725		13.2008	0.91133		13.2007	0.906984		13.2007	0.9166		13.2007	0.919538		13.2008	0.908179		13.2007	0.906552		13.2007	0.908387		13.2007	0.907361		13.2007	0.912057		13.2007	0.912459		13.2007	0.871191		13.2007	0.912511		13.2007	0.889808		13.2007	0.912598
13.2508	0.911238		13.2507	0.913043		13.2507	0.913657		13.2508	0.910906		13.2508	0.906801		13.2507	0.914238		13.2507	0.918157		13.2508	0.908192		13.2507	0.906322		13.2507	0.910117		13.2507	0.910866		13.2507	0.909149		13.2507	0.91107		13.2507	0.864259		13.2507	0.914055		13.2507	0.889756		13.2507	0.912516
13.3008	0.913117		13.3007	0.916325		13.3007	0.913053		13.3008	0.910205		13.3008	0.907074		13.3007	0.914422		13.3007	0.917827		13.3008	0.909924		13.3007	0.905829		13.3007	0.911515		13.3007	0.910028		13.3008	0.91434		13.3007	0.911446		13.3007	0.867993		13.3007	0.91104		13.3007	0.888159		13.3007	0.911548
13.3508	0.913589		13.3507	0.914944		13.3507	0.915961		13.3508	0.90885		13.3508	0.908442		13.3507	0.912577		13.3507	0.918006		13.3508	0.910294		13.3508	0.909454		13.3507	0.907382		13.3507	0.910608		13.3508	0.912946		13.3507	0.912177		13.3507	0.868625		13.3507	0.914067		13.3507	0.890524		13.3507	0.91429
13.4008	0.912491		13.4007	0.913261		13.4007	0.913827		13.4008	0.911703		13.4008	0.907341		13.4007	0.91525		13.4007	0.918967		13.4008	0.909469		13.4008	0.907877		13.4007	0.906469		13.4007	0.908238		13.4008	0.909923		13.4007	0.912706		13.4007	0.859926		13.4007	0.911001		13.4008	0.889759		13.4007	0.910371
13.4508	0.912962		13.4507	0.91399		13.4507	0.912171		13.4508	0.91362		13.4508	0.909343		13.4507	0.91335		13.4507	0.921523		13.4508	0.905572		13.4508	0.903533		13.4507	0.908072		13.4507	0.907488		13.4508	0.910821		13.4508	0.911211		13.4507	0.868647		13.4507	0.909638		13.4508	0.887258		13.4507	0.913943
13.5008	0.913367		13.5007	0.911728		13.5007	0.914402		13.5008	0.911373		13.5008	0.909986		13.5007	0.914616		13.5007	0.916745		13.5008	0.910264		13.5008	0.906322		13.5007	0.906452		13.5007	0.908494		13.5008	0.913248		13.5008	0.909002		13.5007	0.866053		13.5007	0.910293		13.5008	0.892114		13.5007	0.909984
13.5508	0.911787		13.5507	0.911431		13.5507	0.913845		13.5508	0.912597		13.5508	0.906939		13.5507	0.914224		13.5507	0.918947		13.5508	0.911783		13.5508	0.907789		13.5507	0.907243		13.5507	0.910929		13.5508	0.91113		13.5508	0.910929		13.5507	0.866439		13.5507	0.911254		13.5508	0.891897		13.5507	0.911972
13.6008	0.911473		13.6007	0.914329		13.6007	0.913309		13.6008	0.910697		13.6008	0.907736		13.6007	0.912795		13.6007	0.916793		13.6008	0.9099		13.6008	0.906312		13.6007	0.906714		13.6007	0.90742		13.6008	0.912698		13.6008	0.912817		13.6007	0.865056		13.6007	0.912698		13.6008	0.889569		13.6007	0.910333
13.6508	0.911972		13.6507	0.913774		13.6507	0.914012		13.6508	0.911731		13.6508	0.904526		13.6507	0.912613		13.6507	0.921907		13.6508	0.909558		13.6508	0.906766		13.6507	0.908385		13.6507	0.906529		13.6508	0.910745		13.6508	0.907482		13.6507	0.860335		13.6507	0.912376		13.6508	0.892788		13.6507	0.912524
13.7008	0.911591		13.7007	0.916293		13.7007	0.914431		13.7008	0.913429		13.7008	0.906304		13.7007	0.912484		13.7007	0.920341		13.7008	0.909806		13.7008	0.908005		13.7007	0.907861		13.7007	0.910777		13.7008	0.912814		13.7008	0.910546		13.7007	0.86222		13.7007	0.912869		13.7008	0.887972		13.7007	0.910904
13.7508	0.911778		13.7507	0.911688		13.7507	0.91252		13.7508	0.910515		13.7508	0.90658		13.7507	0.912092		13.7507	0.917414		13.7508	0.910316		13.7508	0.905166		13.7507	0.907961		13.7507	0.910949		13.7508	0.910224		13.7508	0.908462		13.7507	0.86023		13.7507	0.912415		13.7508	0.89074		13.7507	0.911526
13.8008	0.91407		13.8007	0.912525		13.8007	0.912831		13.8008	0.910264		13.8008	0.908673		13.8007	0.913826		13.8007	0.917701		13.8008	0.911533		13.8008	0.906926		13.8007	0.905253		13.8007	0.908521		13.8008	0.911597		13.8008	0.909909		13.8007	0.864377		13.8007	0.912899		13.8008	0.889408		13.8007	0.911501
13.8508	0.911281		13.8507	0.911371		13.8507	0.914433		13.8508	0.907679		13.8508	0.903282		13.8507	0.914197		13.8507	0.921019		13.8508	0.911613		13.8508	0.906742		13.8507	0.907508		13.8507	0.908341		13.8508	0.912037		13.8508	0.910961		13.8507	0.866974		13.8507	0.912974		13.8508	0.889494		13.8507	0.908757
13.9008	0.911947		13.9007	0.913866		13.9007	0.91292		13.9008	0.912421		13.9008	0.9073		13.9007	0.914801		13.9007	0.91671		13.9008	0.907958		13.9008	0.906032		13.9007	0.90563		13.9007	0.906584		13.9008	0.913435		13.9008	0.908979		13.9007	0.870025		13.9007	0.909768		13.9008	0.888848		13.9007	0.912861
13.9508	0.910967		13.9508	0.911823		13.9507	0.912766		13.9508	0.910113		13.9508	0.90408		13.9507	0.915424		13.9507	0.920938		13.9508	0.907379		13.9508	0.908258		13.9507	0.910189		13.9507	0.908625		13.9508	0.906713		13.9508	0.91167		13.9507	0.8616		13.9507	0.910166		13.9508	0.892686		13.9507	0.909395
14.0008	0.910527		14.0008	0.9115		14.0007	0.90989		14.0008	0.909656		14.0008	0.9038		14.0007	0.911991		14.0007	0.917859		14.0008	0.909243		14.0008	0.905226		14.0007	0.907851		14.0007	0.908081		14.0008	0.913978		14.0008	0.910782		14.0007	0.862089		14.0007	0.912777		14.0008	0.890587		14.0008	0.910988
14.0508	0.911664		14.0508	0.911095		14.0507	0.913866		14.0508	0.913347		14.0508	0.907581		14.0508	0.916978		14.0507	0.918926		14.0508	0.908399		14.0508	0.907453		14.0507	0.908071		14.0507	0.907531		14.0508	0.912078		14.0508	0.91018		14.0507	0.863029		14.0507	0.912333		14.0508	0.889556		14.0508	0.912959
14.1008	0.91256		14.1008	0.912223		14.1007	0.914024		14.1008	0.911737		14.1008	0.907547		14.1008	0.912562		14.1007	0.917245		14.1008	0.909412		14.1008	0.903755		14.1007	0.906946		14.1007	0.907697		14.1008	0.910509		14.1008	0.908272		14.1007	0.861869		14.1007	0.908327		14.1008	0.889362		14.1008	0.91293
14.1508	0.913273		14.1508	0.911247		14.1508	0.915921		14.1508	0.910644		14.1508	0.906407		14.1508	0.91352		14.1507	0.91771		14.1508	0.908841		14.1508	0.905937		14.1508	0.907095		14.1507	0.909353		14.1508	0.909847		14.1508	0.909353		14.1507	0.862177		14.1507	0.911625		14.1508	0.889461		14.1508	0.912244
14.2008	0.913474		14.2008	0.911897		14.2008	0.914434		14.2008	0.910615		14.2008	0.907266		14.2008	0.913567		14.2008	0.920743		14.2008	0.907187		14.2008	0.905038		14.2008	0.910891		14.2007	0.905594		14.2008	0.911651		14.2008	0.910809		14.2007	0.858256		14.2007	0.912803		14.2008	0.887217		14.2008	0.912284
14.2508	0.910894		14.2508	0.912864		14.2508	0.913867		14.2508	0.911533		14.2508	0.907104		14.2508	0.915183		14.2508	0.919795		14.2508	0.909177		14.2508	0.90629		14.2508	0.907493		14.2507	0.906486		14.2508	0.911266		14.2508	0.912096		14.2508	0.864667		14.2507	0.91081		14.2508	0.888873		14.2508	0.913331
14.3008	0.911854		14.3008	0.912081		14.3008	0.91457		14.3008	0.911573		14.3008	0.909379		14.3008	0.914795		14.3008	0.918609		14.3008	0.907504		14.3008	0.904302		14.3008	0.907251		14.3007	0.909368		14.3008	0.910901		14.3008	0.913021		14.3008	0.862148		14.3007	0.911744		14.3008	0.886588		14.3008	0.912353
14.3508	0.912425		14.3508	0.912042		14.3508	0.913132		14.3508	0.91243		14.3508	0.905873		14.3508	0.913437		14.3508	0.919378		14.3508	0.908081		14.3508	0.905446		14.3508	0.906781		14.3508	0.906947		14.3508	0.913862		14.3508	0.90913		14.3508	0.864313		14.3507	0.910505		14.3508	0.888988		14.3508	0.911304
14.4008	0.914647		14.4008	0.912178		14.4008	0.911634		14.4008	0.910151		14.4008	0.903551		14.4008	0.914563		14.4008	0.91601		14.4008	0.905932		14.4008	0.904033		14.4008	0.908898		14.4008	0.907229		14.4008	0.911456		14.4008	0.910712		14.4008	0.860022		14.4007	0.913084		14.4008	0.890201		14.4008	0.911298
14.4508	0.911848		14.4508	0.912264		14.4508	0.914271		14.4508	0.909321		14.4508	0.90589		14.4508	0.911278		14.4508	0.917553		14.4508	0.907757		14.4508	0.906718		14.4508	0.90904		14.4508	0.908849		14.4508	0.910652		14.4508	0.908282		14.4508	0.860045		14.4508	0.909677		14.4508	0.889253		14.4508	0.911487
14.5008	0.911103		14.5008	0.914723		14.5008	0.911959		14.5008	0.907433		14.5008	0.906139		14.5008	0.913721		14.5008	0.917519		14.5008	0.909087		14.5008	0.907599		14.5008	0.907974		14.5008	0.906119		14.5008	0.911522		14.5008	0.911225		14.5008	0.861593		14.5008	0.911774		14.5008	0.890331		14.5008	0.910417
14.5508	0.910818		14.5508	0.911915		14.5508	0.914777		14.5508	0.912152		14.5508	0.905477		14.5508	0.9116		14.5508	0.92024		14.5508	0.907135		14.5508	0.906273		14.5508	0.907176		14.5508	0.907311		14.5508	0.909408		14.5508	0.909481		14.5508	0.863353		14.5508	0.911326		14.5508	0.888194		14.5508	0.912112
14.6008	0.914621		14.6008	0.912205		14.6008	0.910208		14.6008	0.911771		14.6008	0.906854		14.6008	0.914601		14.6008	0.919967		14.6008	0.910892		14.6008	0.907653		14.6008	0.907994		14.6008	0.908702		14.6008	0.913634		14.6008	0.910115		14.6008	0.858593		14.6008	0.910404		14.6008	0.885801		14.6008	0.909074
14.6508	0.91125		14.6508	0.91189		14.6508	0.915002		14.6508	0.909388		14.6508	0.904092		14.6508	0.912453		14.6508	0.920016		14.6508	0.90694		14.6508	0.907505		14.6508	0.904666		14.6508	0.908537		14.6508	0.90972		14.6508	0.911385		14.6508	0.868879		14.6508	0.907609		14.6508	0.889606		14.6508	0.913028
14.7008	0.911692		14.7008	0.911046		14.7008	0.910338		14.7008	0.910348		14.7008	0.907714		14.7008	0.911117		14.7008	0.919924		14.7008	0.907914		14.7008	0.904521		14.7008	0.90664		14.7008	0.906209		14.7008	0.909009		14.7008	0.911351		14.7008	0.860822		14.7008	0.910032		14.7008	0.888707		14.7008	0.912702
14.7508	0.912657		14.7508	0.908079		14.7508	0.914301		14.7508	0.912098		14.7508	0.90644		14.7508	0.911665		14.7508	0.920786		14.7508	0.90694		14.7508	0.905543		14.7508	0.908849		14.7508	0.908921		14.7508	0.913366		14.7508	0.909896		14.7508	0.859346		14.7508	0.90916		14.7508	0.888866		14.7508	0.91081
14.8008	0.910597		14.8008	0.910389		14.8008	0.911172		14.8008	0.911508		14.8008	0.906747		14.8008	0.912797		14.8008	0.919398		14.8008	0.906035		14.8008	0.906992		14.8008	0.906799		14.8008	0.90645		14.8008	0.910077		14.8008	0.90814		14.8008	0.861025		14.8008	0.911609		14.8008	0.889368		14.8008	0.91349
14.8508	0.91076		14.8508	0.911451		14.8508	0.909944		14.8508	0.910442		14.8508	0.904217		14.8508	0.911614		14.8508	0.917989		14.8508	0.90548		14.8508	0.905668		14.8508	0.908983		14.8508	0.907451		14.8508	0.909276		14.8508	0.91047		14.8508	0.860899		14.8508	0.910618		14.8508	0.886418		14.8508	0.91285
14.9008	0.911927		14.9008	0.911326		14.9008	0.914499		14.9009	0.910027		14.9008	0.903468		14.9008	0.911701		14.9008	0.921662		14.9008	0.906732		14.9008	0.904261		14.9008	0.910065		14.9008	0.908672		14.9008	0.910554		14.9008	0.908208		14.9008	0.867139		14.9008	0.909867		14.9008	0.890248		14.9008	0.91311
14.9508	0.911062		14.9508	0.91159		14.9508	0.912326		14.9509	0.911917		14.9508	0.907039		14.9508	0.911715		14.9508	0.917801		14.9508	0.906816		14.9508	0.906532		14.9508	0.9065		14.9508	0.907882		14.9508	0.909195		14.9508	0.910332		14.9508	0.86055		14.9508	0.911646		14.9508	0.886498		14.9508	0.915726
15.0009	0.911106		15.0008	0.910343		15.0008	0.911823		15.0009	0.912026		15.0008	0.903943		15.0008	0.913737		15.0008	0.921367		15.0009	0.907669		15.0008	0.904681		15.0008	0.908197		15.0008	0.905249		15.0008	0.909665		15.0008	0.906981		15.0008	0.862488		15.0008	0.90984		15.0008	0.888431		15.0008	0.910022
15.0509	0.912936		15.0508	0.912893		15.0508	0.913965		15.0509	0.911421		15.0508	0.904355		15.0508	0.912469		15.0508	0.916441		15.0509	0.90883		15.0508	0.906288		15.0508	0.90737		15.0508	0.906171		15.0508	0.911016		15.0508	0.908542		15.0508	0.867335		15.0508	0.908644		15.0508	0.889418		15.0508	0.910799
15.1009	0.913742		15.1008	0.910683		15.1008	0.911152		15.1009	0.911224		15.1009	0.906769		15.1008	0.912799		15.1008	0.919397		15.1009	0.908162		15.1008	0.903546		15.1008	0.904148		15.1008	0.909497		15.1009	0.910271		15.1008	0.910696		15.1008	0.864029		15.1008	0.91353		15.1008	0.888748		15.1008	0.91376
15.1509	0.91417		15.1508	0.911109		15.1508	0.912986		15.1509	0.91102		15.1509	0.905261		15.1508	0.915611		15.1508	0.915888		15.1509	0.907135		15.1508	0.90675		15.1508	0.905095		15.1508	0.905632		15.1509	0.911546		15.1508	0.909254		15.1508	0.864076		15.1508	0.908271		15.1508	0.887784		15.1508	0.913218
15.2009	0.912804		15.2008	0.913113		15.2008	0.913617		15.2009	0.910822		15.2009	0.904243		15.2008	0.912589		15.2008	0.920287		15.2009	0.906801		15.2009	0.907651		15.2008	0.906158		15.2008	0.904585		15.2009	0.909579		15.2008	0.909476		15.2008	0.865851		15.2008	0.907946		15.2008	0.883984		15.2008	0.91225
15.2509	0.913123		15.2508	0.909227		15.2508	0.912806		15.2509	0.911434		15.2509	0.907967		15.2508	0.911689		15.2508	0.91983		15.2509	0.907707		15.2509	0.906835		15.2508	0.906011		15.2508	0.907241		15.2509	0.90722		15.2508	0.909427		15.2508	0.859519		15.2508	0.911963		15.2509	0.893509		15.2508	0.90923
15.3009	0.910877		15.3008	0.911107		15.3008	0.911214		15.3009	0.908845		15.3009	0.90379		15.3008	0.911354		15.3008	0.920383		15.3009	0.908176		15.3009	0.903139		15.3008	0.907735		15.3008	0.907524		15.3009	0.910803		15.3009	0.909034		15.3008	0.869098		15.3008	0.912026		15.3009	0.887022		15.3008	0.913164
15.3509	0.911096		15.3508	0.912204		15.3508	0.912723		15.3509	0.909117		15.3509	0.906261		15.3508	0.913038		15.3508	0.918523		15.3509	0.906377		15.3509	0.909836		15.3508	0.907348		15.3508	0.907461		15.3509	0.909063		15.3509	0.909348		15.3508	0.859999		15.3508	0.90903		15.3509	0.889694		15.3508	0.912408
15.4009	0.910918		15.4008	0.910241		15.4008	0.910731		15.4009	0.909198		15.4009	0.905463		15.4008	0.91418		15.4008	0.916542		15.4009	0.908113		15.4009	0.906313		15.4008	0.909339		15.4008	0.905822		15.4009	0.911415		15.4009	0.909494		15.4008	0.861408		15.4008	0.912404		15.4009	0.888738		15.4008	0.909382
15.4509	0.911437		15.4508	0.914433		15.4508	0.913743		15.4509	0.909485		15.4509	0.906473		15.4508	0.912946		15.4508	0.916655		15.4509	0.907937		15.4509	0.905254		15.4508	0.905594		15.4508	0.906516		15.4509	0.908915		15.4509	0.910087		15.4508	0.864835		15.4508	0.908908		15.4509	0.886126		15.4508	0.914176
15.5009	0.910653		15.5008	0.913446		15.5008	0.913888		15.5009	0.912421		15.5009	0.90618		15.5008	0.911221		15.5008	0.915995		15.5009	0.908822		15.5009	0.904678		15.5008	0.90934		15.5008	0.907663		15.5009	0.912425		15.5009	0.911721		15.5008	0.866294		15.5008	0.910288		15.5009	0.891504		15.5008	0.910575
15.5509	0.91298		15.5508	0.911368		15.5508	0.913426		15.5509	0.910054		15.5509	0.902597		15.5508	0.914384		15.5508	0.917008		15.5509	0.904463		15.5509	0.906384		15.5508	0.904726		15.5508	0.904953		15.5509	0.910637		15.5509	0.910403		15.5508	0.866779		15.5508	0.910701		15.5509	0.887674		15.5508	0.912944
15.6009	0.91036		15.6008	0.909294		15.6008	0.910642		15.6009	0.910073		15.6009	0.907019		15.6008	0.91249		15.6008	0.920184		15.6009	0.905129		15.6009	0.905128		15.6008	0.906468		15.6008	0.909809		15.6009	0.908718		15.6009	0.907205		15.6008	0.86276		15.6008	0.911808		15.6009	0.886867		15.6008	0.910817
15.6509	0.910888		15.6508	0.909366		15.6508	0.911695		15.6509	0.911213		15.6509	0.906509		15.6508	0.912667		15.6508	0.916075		15.6509	0.906109		15.6509	0.904895		15.6508	0.906743		15.6508	0.906446		15.6509	0.910212		15.6509	0.912383		15.6508	0.859972		15.6508	0.908026		15.6509	0.886247		15.6508	0.913264
15.7009	0.911054		15.7008	0.912332		15.7008	0.911802		15.7009	0.909425		15.7009	0.905394		15.7008	0.910235		15.7008	0.917556		15.7009	0.907383		15.7009	0.903537		15.7008	0.905498		15.7008	0.908236		15.7009	0.911582		15.7009	0.909664		15.7008	0.866117		15.7008	0.909026		15.7009	0.887215		15.7008	0.912971
15.7509	0.90826		15.7508	0.910448		15.7508	0.912423		15.7509	0.909629		15.7509	0.905987		15.7508	0.912779		15.7508	0.916564		15.7509	0.906826		15.7509	0.907253		15.7508	0.908227		15.7508	0.90767		15.7509	0.908262		15.7509	0.909662		15.7508	0.861551		15.7508	0.910625		15.7509	0.886976		15.7508	0.91028
15.8009	0.910193		15.8009	0.91127		15.8008	0.911138		15.8009	0.90949		15.8009	0.904589		15.8008	0.910574		15.8008	0.915876		15.8009	0.90971		15.8009	0.901665		15.8008	0.90622		15.8008	0.905961		15.8009	0.908642		15.8009	0.90777		15.8008	0.864278		15.8008	0.908775		15.8009	0.885224		15.8008	0.911927
15.8509	0.910224		15.8509	0.913299		15.8508	0.911665		15.8509	0.906669		15.8509	0.902717		15.8508	0.912722		15.8508	0.917727		15.8509	0.904948		15.8509	0.903071		15.8508	0.907882		15.8508	0.90778		15.8509	0.908174		15.8509	0.908461		15.8508	0.867679		15.8508	0.907855		15.8509	0.889999		15.8509	0.912288
15.9009	0.910657		15.9009	0.910725		15.9008	0.910757		15.9009	0.912674		15.9009	0.905971		15.9009	0.911423		15.9008	0.918583		15.9009	0.906532		15.9009	0.903463		15.9008	0.906733		15.9008	0.90694		15.9009	0.907363		15.9009	0.909008		15.9008	0.861046		15.9008	0.909451		15.9009	0.888441		15.9009	0.910048
15.9509	0.91041		15.9509	0.911916		15.9509	0.911459		15.9509	0.910529		15.9509	0.90479		15.9509	0.913825		15.9508	0.916577		15.9509	0.907732		15.9509	0.904314		15.9508	0.904655		15.9508	0.904552		15.9509	0.910449		15.9509	0.907608		15.9508	0.862413		15.9508	0.905513		15.9509	0.889782		15.9509	0.90996
16.0009	0.910109		16.0009	0.910703		16.0009	0.910187		16.0009	0.908537		16.0009	0.904932		16.0009	0.912258		16.0008	0.919921		16.0009	0.905009		16.0009	0.906146		16.0009	0.905712		16.0008	0.907542		16.0009	0.910423		16.0009	0.908694		16.0008	0.861715		16.0008	0.908347		16.0009	0.889151		16.0009	0.910076
16.0509	0.911232		16.0509	0.912416		16.0509	0.909632		16.0509	0.91178		16.0509	0.906851		16.0509	0.911367		16.0509	0.917974		16.0509	0.906761		16.0509	0.904485		16.0509	0.906767		16.0508	0.906704		16.0509	0.90944		16.0509	0.909445		16.0508	0.860135		16.0508	0.910291		16.0509	0.883596		16.0509	0.911025
16.1009	0.91104		16.1009	0.913103		16.1009	0.913687		16.1009	0.909042		16.1009	0.904269		16.1009	0.912465		16.1009	0.917192		16.1009	0.904455		16.1009	0.902811		16.1009	0.906839		16.1008	0.906876		16.1009	0.908831		16.1009	0.909977		16.1009	0.864975		16.1008	0.90864		16.1009	0.884928		16.1009	0.909427
16.1509	0.909969		16.1509	0.911135		16.1509	0.912401		16.1509	0.911325		16.1509	0.906177		16.1509	0.907804		16.1509	0.918078		16.1509	0.905152		16.1509	0.902948		16.1509	0.905554		16.1508	0.904016		16.1509	0.90803		16.1509	0.910056		16.1509	0.866063		16.1508	0.908279		16.1509	0.88471		16.1509	0.910848
16.2009	0.910988		16.2009	0.911546		16.2009	0.911437		16.2009	0.907905		16.2009	0.905626		16.2009	0.910133		16.2009	0.916493		16.2009	0.905908		16.2009	0.903081		16.2009	0.907564		16.2009	0.908357		16.2009	0.907203		16.2009	0.91075		16.2009	0.866218		16.2008	0.908701		16.2009	0.888943		16.2009	0.910132
16.2509	0.910329		16.2509	0.909036		16.2509	0.909784		16.2509	0.910968		16.2509	0.905508		16.2509	0.91279		16.2509	0.916295		16.2509	0.907894		16.2509	0.904682		16.2509	0.907626		16.2509	0.9041		16.2509	0.908182		16.2509	0.907802		16.2509	0.866696		16.2508	0.911418		16.2509	0.882434		16.2509	0.913862
16.3009	0.9103		16.3009	0.914049		16.3009	0.913977		16.3009	0.907904		16.3009	0.902785		16.3009	0.911069		16.3009	0.918377		16.3009	0.905081		16.3009	0.903851		16.3009	0.905837		16.3009	0.90623		16.3009	0.907261		16.3009	0.909296		16.3009	0.86085		16.3009	0.910279		16.3009	0.887808		16.3009	0.912333
16.3509	0.910367		16.3509	0.910118		16.3509	0.909739		16.3509	0.908832		16.3509	0.904436		16.3509	0.909907		16.3509	0.920259		16.3509	0.905507		16.3509	0.904264		16.3509	0.904601		16.3509	0.907107		16.3509	0.909526		16.3509	0.906521		16.3509	0.856186		16.3509	0.911246		16.3509	0.885914		16.3509	0.910834
16.4009	0.908341		16.4009	0.91111		16.4009	0.911783		16.4009	0.906865		16.4009	0.904845		16.4009	0.911181		16.4009	0.914136		16.4009	0.902893		16.4009	0.905381		16.4009	0.903849		16.4009	0.907847		16.4009	0.909278		16.4009	0.908312		16.4009	0.863467		16.4009	0.910437		16.4009	0.88527		16.4009	0.910532
16.4509	0.910925		16.4509	0.912754		16.4509	0.911309		16.4509	0.908769		16.4509	0.903505		16.4509	0.911318		16.4509	0.917384		16.4509	0.905408		16.4509	0.90589		16.4509	0.90593		16.4509	0.907831		16.4509	0.91238		16.4509	0.9097		16.4509	0.861555		16.4509	0.909511		16.4509	0.884644		16.4509	0.913508
16.5009	0.909795		16.5009	0.911954		16.5009	0.913259		16.5009	0.908343		16.5009	0.904874		16.5009	0.90763		16.5009	0.916771		16.5009	0.906794		16.5009	0.903302		16.5009	0.905502		16.5009	0.903739		16.5009	0.909446		16.5009	0.908373		16.5009	0.859258		16.5009	0.909193		16.5009	0.884402		16.5009	0.913066
16.5509	0.912127		16.5509	0.908764		16.5509	0.913164		16.5509	0.907597		16.5509	0.90642		16.5509	0.912529		16.5509	0.920048		16.5509	0.905516		16.5509	0.905998		16.5509	0.905222		16.5509	0.906116		16.5509	0.907366		16.5509	0.908079		16.5509	0.861087		16.5509	0.908417		16.5509	0.883507		16.5509	0.912833
16.6009	0.91277		16.6009	0.912832		16.6009	0.913112		16.6009	0.909529		16.6009	0.90506		16.6009	0.912438		16.6009	0.915393		16.6009	0.906576		16.6009	0.906722		16.6009	0.905399		16.6009	0.907372		16.6009	0.911701		16.6009	0.907606		16.6009	0.856041		16.6009	0.909591		16.6009	0.887869		16.6009	0.911948
16.6509	0.911581		16.6509	0.910559		16.6509	0.910767		16.6509	0.906934		16.6509	0.904782		16.6509	0.909266		16.6509	0.916158		16.6509	0.905703		16.6509	0.904814		16.6509	0.905397		16.6509	0.905906		16.6509	0.908126		16.6509	0.908605		16.6509	0.864427		16.6509	0.908418		16.6509	0.886293		16.6509	0.908855
16.7009	0.910842		16.7009	0.908244		16.7009	0.910811		16.7009	0.908344		16.7009	0.903399		16.7009	0.909478		16.7009	0.918647		16.7009	0.904414		16.7009	0.903537		16.7009	0.904735		16.7009	0.90732		16.7009	0.9091		16.7009	0.909758		16.7009	0.863367		16.7009	0.908793		16.7009	0.88516		16.7009	0.911197
16.7509	0.911269		16.7509	0.912609		16.7509	0.91351		16.751	0.908648		16.7509	0.903963		16.7509	0.910938		16.7509	0.918362		16.7509	0.904929		16.7509	0.902251		16.7509	0.905916		16.7509	0.902827		16.7509	0.906508		16.7509	0.908761		16.7509	0.862107		16.7509	0.908495		16.7509	0.887072		16.7509	0.910757
16.8009	0.910391		16.8009	0.910847		16.8009	0.909674		16.801	0.907938		16.8009	0.901799		16.8009	0.913427		16.8009	0.917206		16.8009	0.906554		16.8009	0.90685		16.8009	0.904352		16.8009	0.903753		16.8009	0.908335		16.8009	0.9106		16.8009	0.861445		16.8009	0.909102		16.8009	0.884906		16.8009	0.913173
16.851	0.908604		16.8509	0.912158		16.8509	0.913106		16.851	0.908949		16.8509	0.901487		16.8509	0.909519		16.8509	0.919141		16.851	0.907525		16.8509	0.902652		16.8509	0.90496		16.8509	0.9028		16.8509	0.907139		16.8509	0.909786		16.8509	0.856064		16.8509	0.907969		16.8509	0.88759		16.8509	0.913608
16.901	0.909391		16.9009	0.911111		16.9009	0.911706		16.901	0.909241		16.901	0.905356		16.9009	0.910354		16.9009	0.91593		16.901	0.906611		16.9009	0.901695		16.9009	0.905514		16.9009	0.906053		16.9009	0.907704		16.9009	0.91141		16.9009	0.860694		16.9009	0.91048		16.9009	0.887055		16.9009	0.910652
16.951	0.911316		16.9509	0.909204		16.9509	0.912948		16.951	0.910891		16.951	0.90199		16.9509	0.912746		16.9509	0.91639		16.951	0.902954		16.9509	0.904802		16.9509	0.904658		16.9509	0.905314		16.951	0.906229		16.9509	0.908781		16.9509	0.857737		16.9509	0.907264		16.9509	0.887362		16.9509	0.914969
17.001	0.90918		17.0009	0.912094		17.0009	0.911041		17.001	0.90961		17.001	0.904043		17.0009	0.911634		17.0009	0.918603		17.001	0.906089		17.001	0.904834		17.0009	0.904798		17.0009	0.904943		17.001	0.907966		17.0009	0.908552		17.0009	0.861017		17.0009	0.907955		17.0009	0.886072		17.0009	0.911516
17.051	0.910663		17.0509	0.907913		17.0509	0.912728		17.051	0.907322		17.051	0.903547		17.0509	0.9133		17.0509	0.919935		17.051	0.90353		17.051	0.904079		17.0509	0.904586		17.0509	0.906379		17.051	0.909147		17.0509	0.907665		17.0509	0.863847		17.0509	0.909659		17.051	0.888357		17.0509	0.912221
17.101	0.909393		17.1009	0.911511		17.1009	0.913472		17.101	0.907746		17.101	0.90439		17.1009	0.91166		17.1009	0.918293		17.101	0.906282		17.101	0.904721		17.1009	0.907458		17.1009	0.904325		17.101	0.913894		17.101	0.906462		17.1009	0.861899		17.1009	0.911674		17.101	0.889269		17.1009	0.91405
17.151	0.910011		17.1509	0.908511		17.1509	0.912011		17.151	0.907956		17.151	0.906165		17.1509	0.911534		17.1509	0.921896		17.151	0.902936		17.151	0.904528		17.1509	0.90689		17.1509	0.902405		17.151	0.906816		17.151	0.908024		17.1509	0.862448		17.1509	0.909781		17.151	0.886552		17.1509	0.912111
17.201	0.910531		17.2009	0.908185		17.2009	0.910645		17.201	0.910955		17.201	0.905258		17.2009	0.911647		17.2009	0.917384		17.201	0.905618		17.201	0.902624		17.2009	0.90769		17.2009	0.905267		17.201	0.908541		17.201	0.908432		17.2009	0.865003		17.2009	0.906746		17.201	0.88555		17.2009	0.911543
17.251	0.909595		17.2509	0.907659		17.2509	0.909774		17.251	0.909408		17.251	0.905027		17.2509	0.911929		17.2509	0.920067		17.251	0.905552		17.251	0.903773		17.2509	0.904195		17.2509	0.906278		17.251	0.905586		17.251	0.910941		17.2509	0.861967		17.2509	0.905251		17.251	0.885133		17.2509	0.909722
17.301	0.911764		17.3009	0.911082		17.3009	0.910671		17.301	0.908697		17.301	0.903395		17.3009	0.911163		17.3009	0.919424		17.301	0.903557		17.301	0.90324		17.3009	0.90563		17.3009	0.902779		17.301	0.906738		17.301	0.907606		17.3009	0.861277		17.3009	0.909402		17.301	0.883966		17.3009	0.91078
17.351	0.909468		17.3509	0.910024		17.3509	0.913766		17.351	0.909294		17.351	0.903206		17.3509	0.908503		17.3509	0.917144		17.351	0.904999		17.351	0.901021		17.3509	0.905666		17.3509	0.904163		17.351	0.907282		17.351	0.905183		17.3509	0.859157		17.3509	0.906309		17.351	0.886232		17.3509	0.910355
17.401	0.911238		17.4009	0.908841		17.4009	0.910783		17.401	0.90963		17.401	0.905183		17.4009	0.913763		17.4009	0.918035		17.401	0.907933		17.401	0.904067		17.4009	0.903629		17.4009	0.904032		17.401	0.906601		17.401	0.907625		17.4009	0.857549		17.4009	0.910381		17.401	0.885302		17.4009	0.911468
17.451	0.909626		17.4509	0.910882		17.4509	0.912464		17.451	0.909739		17.451	0.906148		17.4509	0.91186		17.4509	0.91958		17.451	0.904565		17.451	0.907314		17.4509	0.903753		17.4509	0.904215		17.451	0.907876		17.451	0.907189		17.4509	0.860861		17.4509	0.909872		17.451	0.884524		17.4509	0.913294
17.501	0.909878		17.5009	0.90954		17.5009	0.913898		17.501	0.911701		17.501	0.90192		17.5009	0.911326		17.5009	0.920123		17.501	0.904904		17.501	0.903092		17.5009	0.905005		17.5009	0.904664		17.501	0.907482		17.501	0.90979		17.5009	0.865198		17.5009	0.907898		17.501	0.884193		17.5009	0.911397
17.551	0.911252		17.5509	0.907928		17.5509	0.912525		17.551	0.912497		17.551	0.902857		17.5509	0.910549		17.5509	0.919589		17.551	0.905226		17.551	0.903803		17.5509	0.907142		17.5509	0.905009		17.551	0.908879		17.551	0.908547		17.5509	0.857841		17.5509	0.909286		17.551	0.886738		17.5509	0.911182
17.601	0.909057		17.6009	0.908602		17.6009	0.912719		17.601	0.910479		17.601	0.904016		17.6009	0.911705		17.6009	0.91714		17.601	0.905306		17.601	0.905175		17.6009	0.906949		17.6009	0.905899		17.601	0.909112		17.601	0.907047		17.6009	0.864309		17.6009	0.909919		17.601	0.884843		17.6009	0.913825
17.651	0.909514		17.651	0.910561		17.6509	0.911938		17.651	0.907802		17.651	0.905373		17.6509	0.91284		17.6509	0.91584		17.651	0.904346		17.651	0.901096		17.6509	0.903675		17.6509	0.905694		17.651	0.906012		17.651	0.9118		17.6509	0.860843		17.6509	0.906565		17.651	0.890036		17.651	0.910517
17.701	0.908191		17.701	0.910835		17.7009	0.910365		17.701	0.905965		17.701	0.900781		17.701	0.91022		17.7009	0.917951		17.701	0.903799		17.701	0.900802		17.7009	0.902315		17.7009	0.904579		17.701	0.908754		17.701	0.906233		17.7009	0.857287		17.7009	0.909576		17.701	0.88358		17.701	0.911835
17.751	0.909659		17.751	0.912632		17.7509	0.913603		17.751	0.907343		17.751	0.90284		17.751	0.911229		17.7509	0.918969		17.751	0.902646		17.751	0.904207		17.7509	0.904427		17.7509	0.905686		17.751	0.905448		17.751	0.908427		17.7509	0.862462		17.7509	0.906257		17.751	0.88927		17.751	0.914829
17.801	0.908853		17.801	0.91126		17.801	0.911462		17.801	0.906483		17.801	0.904371		17.801	0.909854		17.8009	0.920304		17.801	0.906551		17.801	0.904986		17.8009	0.907714		17.8009	0.903078		17.801	0.906994		17.801	0.905989		17.8009	0.863663		17.8009	0.907953		17.801	0.885952		17.801	0.911708
17.851	0.910938		17.851	0.908075		17.851	0.90879		17.851	0.91007		17.851	0.904977		17.851	0.910444		17.851	0.918156		17.851	0.905527		17.851	0.904371		17.851	0.903741		17.8509	0.905252		17.851	0.908752		17.851	0.910938		17.8509	0.860514		17.8509	0.90753		17.851	0.887389		17.851	0.912237
17.901	0.910793		17.901	0.910119		17.901	0.910162		17.901	0.907115		17.901	0.903366		17.901	0.910036		17.901	0.917684		17.901	0.905884		17.901	0.905233		17.901	0.903495		17.9009	0.904993		17.901	0.908228		17.901	0.905635		17.901	0.860999		17.9009	0.908163		17.901	0.88253		17.901	0.908844
17.951	0.912678		17.951	0.90692		17.951	0.911626		17.951	0.910665		17.951	0.904958		17.951	0.910958		17.951	0.917199		17.951	0.903565		17.951	0.904371		17.951	0.906505		17.9509	0.906225		17.951	0.907758		17.951	0.906007		17.951	0.859425		17.9509	0.905568		17.951	0.884439		17.951	0.915227
18.001	0.910175		18.001	0.909668		18.001	0.910397		18.001	0.907667		18.001	0.904763		18.001	0.911578		18.001	0.917497		18.001	0.90537		18.001	0.904724		18.001	0.902948		18.0009	0.906013		18.001	0.905931		18.001	0.906129		18.001	0.866374		18.0009	0.907382		18.001	0.886586		18.001	0.912629
18.051	0.911457		18.051	0.909745		18.051	0.91141		18.051	0.905272		18.051	0.905396		18.051	0.913072		18.051	0.918407		18.051	0.904254		18.051	0.900323		18.051	0.906384		18.051	0.904118		18.051	0.909714		18.051	0.908883		18.051	0.864054		18.0509	0.906227		18.051	0.8839		18.051	0.910884
18.101	0.910049		18.101	0.911005		18.101	0.90951		18.101	0.910966		18.101	0.90363		18.101	0.909045		18.101	0.918205		18.101	0.905832		18.101	0.902571		18.101	0.905721		18.101	0.903041		18.101	0.905963		18.101	0.907392		18.101	0.861729		18.101	0.907105		18.101	0.885924		18.101	0.913279
18.151	0.910139		18.151	0.908813		18.151	0.911488		18.151	0.907676		18.151	0.904204		18.151	0.911782		18.151	0.917209		18.151	0.90673		18.151	0.90331		18.151	0.902189		18.151	0.904285		18.151	0.909136		18.151	0.908589		18.151	0.86324		18.151	0.906637		18.151	0.883313		18.151	0.910185
18.201	0.909694		18.201	0.906856		18.201	0.914512		18.201	0.909463		18.201	0.905838		18.201	0.911055		18.201	0.919525		18.201	0.904642		18.201	0.905253		18.201	0.903901		18.201	0.906307		18.201	0.908158		18.201	0.911429		18.201	0.859153		18.201	0.907218		18.201	0.883739		18.201	0.912165
18.251	0.910165		18.251	0.910037		18.251	0.910989		18.251	0.909148		18.251	0.901299		18.251	0.910609		18.251	0.919951		18.251	0.90513		18.251	0.904314		18.251	0.907676		18.251	0.903924		18.251	0.906916		18.251	0.90664		18.251	0.862297		18.251	0.910105		18.251	0.885263		18.251	0.908753
18.301	0.908983		18.301	0.911322		18.301	0.909239		18.301	0.907967		18.301	0.902449		18.301	0.908647		18.301	0.919216		18.301	0.904979		18.301	0.903721		18.301	0.903593		18.301	0.904595		18.301	0.907699		18.301	0.910184		18.301	0.863313		18.301	0.907063		18.301	0.885193		18.301	0.911474
18.351	0.907694		18.351	0.908858		18.351	0.91069		18.351	0.907237		18.351	0.902869		18.351	0.914481		18.351	0.918393		18.351	0.904457		18.351	0.905001		18.351	0.903018		18.351	0.904238		18.351	0.906518		18.351	0.906772		18.351	0.853795		18.351	0.908705		18.351	0.880231		18.351	0.911766
18.401	0.911497		18.401	0.908117		18.401	0.914026		18.401	0.908463		18.401	0.9047		18.401	0.912702		18.401	0.915958		18.401	0.904781		18.401	0.900551		18.401	0.902695		18.401	0.902605		18.401	0.908569		18.401	0.910649		18.401	0.857452		18.401	0.907544		18.401	0.885353		18.401	0.911032
18.451	0.91004		18.451	0.908763		18.451	0.910932		18.451	0.907064		18.451	0.905017		18.451	0.908863		18.451	0.918477		18.451	0.904062		18.451	0.903673		18.451	0.905088		18.451	0.90413		18.451	0.907549		18.451	0.907104		18.451	0.859344		18.451	0.907181		18.451	0.884777		18.451	0.910061
18.501	0.910294		18.501	0.909273		18.501	0.909511		18.501	0.910247		18.501	0.905439		18.501	0.912775		18.501	0.919714		18.501	0.90349		18.501	0.904472		18.501	0.904574		18.501	0.906322		18.501	0.908416		18.501	0.906194		18.501	0.857652		18.501	0.909041		18.501	0.883478		18.501	0.914348
18.551	0.910655		18.551	0.911987		18.551	0.91059		18.5511	0.907789		18.551	0.902773		18.551	0.911733		18.551	0.917781		18.551	0.905808		18.551	0.901291		18.551	0.902739		18.551	0.903315		18.551	0.908042		18.551	0.906571		18.551	0.864728		18.551	0.908713		18.551	0.882263		18.551	0.914631
18.601	0.910034		18.601	0.909574		18.601	0.911707		18.6011	0.907152		18.601	0.904458		18.601	0.907317		18.601	0.918921		18.601	0.90451		18.601	0.902914		18.601	0.906026		18.601	0.902982		18.601	0.907659		18.601	0.907452		18.601	0.860395		18.601	0.905566		18.601	0.887299		18.601	0.911694
18.6511	0.906979		18.651	0.909022		18.651	0.909551		18.6511	0.907		18.651	0.905315		18.651	0.910896		18.651	0.915876		18.6511	0.905229		18.651	0.903208		18.651	0.904738		18.651	0.902509		18.651	0.91048		18.651	0.906981		18.651	0.861311		18.651	0.907878		18.651	0.881818		18.651	0.911081
18.7011	0.910421		18.701	0.909996		18.701	0.911443		18.7011	0.907901		18.701	0.90344		18.701	0.908642		18.701	0.918113		18.7011	0.904705		18.701	0.903524		18.701	0.902333		18.701	0.903054		18.701	0.909016		18.701	0.907636		18.701	0.865245		18.701	0.906083		18.701	0.886685		18.701	0.912104
18.7511	0.91008		18.751	0.910911		18.751	0.913668		18.7511	0.910766		18.7511	0.905437		18.751	0.91019		18.751	0.917704		18.7511	0.905451		18.751	0.903948		18.751	0.902969		18.751	0.90423		18.7511	0.906678		18.751	0.90573		18.751	0.86096		18.751	0.908446		18.751	0.887599		18.751	0.910242
18.8011	0.910432		18.801	0.910373		18.801	0.909789		18.8011	0.908205		18.8011	0.902791		18.801	0.910502		18.801	0.919165		18.8011	0.901462		18.801	0.902804		18.801	0.903185		18.801	0.906551		18.8011	0.907249		18.801	0.90496		18.801	0.860251		18.801	0.908118		18.801	0.887166		18.801	0.912983
18.8511	0.911837		18.851	0.911923		18.851	0.914852		18.8511	0.906658		18.8511	0.905898		18.851	0.910028		18.851	0.91693		18.8511	0.90335		18.8511	0.90382		18.851	0.903949		18.851	0.9082		18.8511	0.90578		18.851	0.908176		18.851	0.860735		18.851	0.90735		18.851	0.886338		18.851	0.915487
18.9011	0.911182		18.901	0.90801		18.901	0.908723		18.9011	0.907953		18.9011	0.901542		18.901	0.907944		18.901	0.917054		18.9011	0.903317		18.9011	0.90041		18.901	0.903845		18.901	0.904719		18.9011	0.908192		18.901	0.90806		18.901	0.860173		18.901	0.905462		18.9011	0.886133		18.901	0.911842
18.9511	0.913081		18.951	0.908476		18.951	0.911189		18.9511	0.911308		18.9511	0.903563		18.951	0.91018		18.951	0.91928		18.9511	0.90381		18.9511	0.901011		18.951	0.905457		18.951	0.906277		18.9511	0.907807		18.9511	0.908161		18.951	0.858329		18.951	0.908246		18.9511	0.88508		18.951	0.911864
19.0011	0.910376		19.001	0.90859		19.001	0.912111		19.0011	0.907761		19.0011	0.904123		19.001	0.909067		19.001	0.919224		19.0011	0.903745		19.0011	0.905918		19.001	0.903046		19.001	0.906306		19.0011	0.906064		19.0011	0.907455		19.001	0.858613		19.001	0.909279		19.0011	0.881742		19.001	0.913962
19.0511	0.910722		19.051	0.908535		19.051	0.911979		19.0511	0.907435		19.0511	0.904822		19.051	0.912081		19.051	0.919742		19.0511	0.904734		19.0511	0.899942		19.051	0.904876		19.051	0.906081		19.0511	0.90639		19.0511	0.905707		19.051	0.862277		19.051	0.905935		19.0511	0.884056		19.051	0.913187
19.1011	0.906031		19.101	0.908838		19.101	0.909781		19.1011	0.909842		19.1011	0.903539		19.101	0.909242		19.101	0.915996		19.1011	0.904471		19.1011	0.901689		19.101	0.905894		19.101	0.904406		19.1011	0.909605		19.1011	0.909975		19.101	0.860555		19.101	0.909125		19.1011	0.88475		19.101	0.912232
19.1511	0.907406		19.151	0.907706		19.151	0.910419		19.1511	0.910053		19.1511	0.904147		19.151	0.90826		19.151	0.916489		19.1511	0.905804		19.1511	0.90215		19.151	0.904365		19.151	0.906143		19.1511	0.90805		19.1511	0.907391		19.151	0.862246		19.151	0.907562		19.1511	0.8818		19.151	0.911178
19.2011	0.910056		19.201	0.908835		19.201	0.909773		19.2011	0.904867		19.2011	0.901614		19.201	0.91212		19.201	0.919		19.2011	0.905667		19.2011	0.905089		19.201	0.902502		19.201	0.906191		19.2011	0.906397		19.2011	0.908279		19.201	0.86429		19.201	0.90746		19.2011	0.882177		19.201	0.912566
19.2511	0.909296		19.251	0.908001		19.251	0.912064		19.2511	0.907939		19.2511	0.905766		19.251	0.9087		19.251	0.917815		19.2511	0.906307		19.2511	0.905039		19.251	0.906096		19.251	0.906859		19.2511	0.905494		19.2511	0.909218		19.251	0.862604		19.251	0.910251		19.2511	0.883494		19.251	0.911914
19.3011	0.90931		19.301	0.910299		19.301	0.911453		19.3011	0.909326		19.3011	0.90352		19.301	0.913369		19.301	0.917979		19.3011	0.90194		19.3011	0.901757		19.301	0.902908		19.301	0.90628		19.3011	0.90685		19.3011	0.907717		19.301	0.858459		19.301	0.909445		19.3011	0.884187		19.301	0.90988
19.3511	0.909035		19.351	0.90957		19.351	0.913519		19.3511	0.908466		19.3511	0.903755		19.351	0.908016		19.351	0.915359		19.3511	0.900291		19.3511	0.901012		19.351	0.901169		19.351	0.904192		19.3511	0.905165		19.3511	0.906183		19.351	0.860847		19.351	0.907093		19.3511	0.884574		19.351	0.911959
19.4011	0.910155		19.401	0.906324		19.401	0.913034		19.4011	0.907784		19.4011	0.90407		19.401	0.906978		19.401	0.916945		19.4011	0.903581		19.4011	0.900455		19.401	0.904169		19.401	0.902713		19.4011	0.908254		19.4011	0.906562		19.401	0.858391		19.401	0.906677		19.4011	0.882889		19.401	0.911523
19.4511	0.908822		19.4511	0.907531		19.451	0.910197		19.4511	0.909864		19.4511	0.903128		19.451	0.910048		19.451	0.91495		19.4511	0.904711		19.4511	0.902475		19.451	0.905304		19.451	0.904466		19.4511	0.904562		19.4511	0.906543		19.451	0.857711		19.451	0.906329		19.4511	0.883936		19.451	0.910559
19.5011	0.910645		19.5011	0.90859		19.501	0.909584		19.5011	0.908988		19.5011	0.903791		19.501	0.910023		19.501	0.916289		19.5011	0.904568		19.5011	0.902451		19.501	0.904679		19.501	0.903513		19.5011	0.904638		19.5011	0.909197		19.501	0.862744		19.501	0.905807		19.5011	0.883688		19.5011	0.911029
19.5511	0.908851		19.5511	0.90941		19.551	0.913209		19.5511	0.909578		19.5511	0.905959		19.5511	0.906397		19.551	0.918236		19.5511	0.901412		19.5511	0.89969		19.551	0.901975		19.551	0.905836		19.5511	0.906974		19.5511	0.907187		19.551	0.854736		19.551	0.905705		19.5511	0.882123		19.5511	0.911005
19.6011	0.909548		19.6011	0.909661		19.6011	0.913267		19.6011	0.907487		19.6011	0.903471		19.6011	0.909296		19.601	0.916943		19.6011	0.908185		19.6011	0.902947		19.601	0.906485		19.601	0.904231		19.6011	0.905526		19.6011	0.905785		19.601	0.857743		19.601	0.907897		19.6011	0.884783		19.6011	0.908652
19.6511	0.909223		19.6511	0.911298		19.6511	0.91232		19.6511	0.909446		19.6511	0.905032		19.6511	0.908829		19.651	0.919816		19.6511	0.904583		19.6511	0.904726		19.6511	0.904327		19.651	0.904732		19.6511	0.907708		19.6511	0.907257		19.651	0.854266		19.651	0.907546		19.6511	0.882632		19.6511	0.910283
19.7011	0.908738		19.7011	0.90977		19.7011	0.911669		19.7011	0.906825		19.7011	0.900968		19.7011	0.909871		19.7011	0.914716		19.7011	0.906371		19.7011	0.902978		19.7011	0.904796		19.701	0.906454		19.7011	0.904675		19.7011	0.904019		19.701	0.865044		19.701	0.908063		19.7011	0.881035		19.7011	0.911917
19.7511	0.90948		19.7511	0.906768		19.7511	0.912047		19.7511	0.908		19.7511	0.905813		19.7511	0.907686		19.7511	0.916819		19.7511	0.901924		19.7511	0.904268		19.7511	0.904913		19.751	0.902556		19.7511	0.906323		19.7511	0.907572		19.7511	0.863216		19.751	0.90775		19.7511	0.883315		19.7511	0.912089
19.8011	0.910741		19.8011	0.909388		19.8011	0.912092		19.8011	0.908509		19.8011	0.904469		19.8011	0.905771		19.8011	0.915852		19.8011	0.903266		19.8011	0.902709		19.8011	0.900421		19.801	0.904065		19.8011	0.905989		19.8011	0.908207		19.8011	0.857314		19.801	0.908741		19.8011	0.886218		19.8011	0.908627
19.8511	0.909287		19.8511	0.91094		19.8511	0.908916		19.8511	0.908461		19.8511	0.902522		19.8511	0.907594		19.8511	0.916328		19.8511	0.902376		19.8511	0.903537		19.8511	0.905676		19.8511	0.900795		19.8511	0.906738		19.8511	0.910151		19.8511	0.858983		19.851	0.908757		19.8511	0.885725		19.8511	0.913097
19.9011	0.910095		19.9011	0.908448		19.9011	0.911327		19.9011	0.908103		19.9011	0.902448		19.9011	0.906427		19.9011	0.916605		19.9011	0.901608		19.9011	0.903733		19.9011	0.904008		19.9011	0.903555		19.9011	0.90783		19.9011	0.907332		19.9011	0.859756		19.901	0.905449		19.9011	0.885062		19.9011	0.911586
19.9511	0.908541		19.9511	0.909109		19.9511	0.91103		19.9511	0.904957		19.9511	0.901505		19.9511	0.909338		19.9511	0.918348		19.9511	0.904005		19.9511	0.902924		19.9511	0.903		19.9511	0.904995		19.9511	0.904222		19.9511	0.909146		19.9511	0.8623		19.9511	0.906502		19.9511	0.883024		19.9511	0.91207
20.0011	0.907716		20.0011	0.911792		20.0011	0.909837		20.0011	0.905356		20.0011	0.905332		20.0011	0.908762		20.0011	0.918799		20.0011	0.902333		20.0011	0.9014		20.0011	0.904553		20.0011	0.902691		20.0011	0.909403		20.0011	0.907629		20.0011	0.852213		20.0011	0.907061		20.0011	0.885388		20.0011	0.910571
20.0511	0.907979		20.0511	0.909923		20.0511	0.91205		20.0511	0.906514		20.0511	0.904973		20.0511	0.906109		20.0511	0.919127		20.0511	0.905701		20.0511	0.901647		20.0511	0.905002		20.0511	0.903064		20.0511	0.907493		20.0511	0.906469		20.0511	0.861332		20.0511	0.906226		20.0511	0.882644		20.0511	0.914252
20.1011	0.908387		20.1011	0.914081		20.1011	0.911985		20.1011	0.905035		20.1011	0.904608		20.1011	0.908243		20.1011	0.918141		20.1011	0.902338		20.1011	0.902203		20.1011	0.904219		20.1011	0.904209		20.1011	0.907591		20.1011	0.907081		20.1011	0.857545		20.1011	0.90752		20.1011	0.884974		20.1011	0.914896
20.1511	0.908826		20.1511	0.910778		20.1511	0.911087		20.1511	0.907443		20.1511	0.903571		20.1511	0.907396		20.1511	0.918309		20.1511	0.904024		20.1511	0.900264		20.1511	0.904072		20.1511	0.901918		20.1511	0.90581		20.1511	0.905662		20.1511	0.860359		20.1511	0.909444		20.1511	0.886038		20.1511	0.914468
20.2011	0.910151		20.2011	0.907326		20.2011	0.909945		20.2011	0.908626		20.2011	0.902793		20.2011	0.909107		20.2011	0.917744		20.2011	0.904212		20.2011	0.903947		20.2011	0.904642		20.2011	0.903233		20.2011	0.907049		20.2011	0.905249		20.2011	0.857626		20.2011	0.907618		20.2011	0.882584		20.2011	0.913232
20.2511	0.910694		20.2511	0.907242		20.2511	0.910978		20.2511	0.907577		20.2511	0.906804		20.2511	0.90902		20.2511	0.919804		20.2511	0.902214		20.2511	0.902306		20.2511	0.904435		20.2511	0.904199		20.2511	0.907398		20.2511	0.910065		20.2511	0.855444		20.2511	0.907382		20.2511	0.883767		20.2511	0.913063
20.3011	0.908552		20.3011	0.910036		20.3011	0.911113		20.3011	0.905866		20.3011	0.900966		20.3011	0.908846		20.3011	0.91474		20.3011	0.904389		20.3011	0.90066		20.3011	0.905297		20.3011	0.905521		20.3011	0.908122		20.3011	0.906741		20.3011	0.861253		20.3011	0.907988		20.3011	0.888662		20.3011	0.913372
20.3511	0.908424		20.3511	0.909344		20.3511	0.912711		20.3511	0.906999		20.3511	0.903229		20.3511	0.910021		20.3511	0.91613		20.3511	0.903615		20.3511	0.900053		20.3511	0.903348		20.3511	0.903167		20.3511	0.906623		20.3511	0.906641		20.3511	0.861407		20.3511	0.906094		20.3511	0.882607		20.3511	0.909365
20.4011	0.910009		20.4011	0.910868		20.4011	0.911231		20.4012	0.904579		20.4011	0.902554		20.4011	0.905586		20.4011	0.916853		20.4011	0.903072		20.4011	0.905947		20.4011	0.907652		20.4011	0.90623		20.4011	0.904716		20.4011	0.908644		20.4011	0.85491		20.4011	0.905677		20.4011	0.881526		20.4011	0.913694
20.4511	0.907389		20.4511	0.910516		20.4511	0.912356		20.4512	0.9073		20.4511	0.904314		20.4511	0.907454		20.4511	0.918463		20.4511	0.905614		20.4511	0.904858		20.4511	0.902874		20.4511	0.903874		20.4511	0.906488		20.4511	0.90745		20.4511	0.861473		20.4511	0.910485		20.4511	0.883284		20.4511	0.910359
20.5012	0.911072		20.5011	0.908733		20.5011	0.909025		20.5012	0.903894		20.5011	0.904251		20.5011	0.910824		20.5011	0.916623		20.5012	0.90453		20.5011	0.904459		20.5011	0.905028		20.5011	0.90333		20.5011	0.906565		20.5011	0.905433		20.5011	0.856479		20.5011	0.904694		20.5011	0.88417		20.5011	0.915071
20.5512	0.910821		20.5511	0.907265		20.5511	0.912488		20.5512	0.908973		20.5511	0.902987		20.5511	0.910555		20.5511	0.918535		20.5512	0.905823		20.5511	0.903554		20.5511	0.900085		20.5511	0.90643		20.5511	0.904735		20.5511	0.904688		20.5511	0.85968		20.5511	0.905627		20.5511	0.881028		20.5511	0.912474
20.6012	0.912187		20.6011	0.908266		20.6011	0.910228		20.6012	0.906994		20.6012	0.902561		20.6011	0.906847		20.6011	0.916739		20.6012	0.902587		20.6011	0.903136		20.6011	0.902544		20.6011	0.905168		20.6012	0.90604		20.6011	0.909212		20.6011	0.859226		20.6011	0.907607		20.6011	0.884887		20.6011	0.91346
20.6512	0.909172		20.6511	0.907567		20.6511	0.911891		20.6512	0.908212		20.6512	0.903111		20.6511	0.908052		20.6511	0.91517		20.6512	0.902252		20.6511	0.901088		20.6511	0.905136		20.6511	0.905979		20.6512	0.906526		20.6511	0.908605		20.6511	0.858438		20.6511	0.905156		20.6511	0.882904		20.6511	0.910761
20.7012	0.911904		20.7011	0.910074		20.7011	0.912762		20.7012	0.907132		20.7012	0.906042		20.7011	0.905663		20.7011	0.916697		20.7012	0.902771		20.7012	0.902835		20.7011	0.906501		20.7011	0.90267		20.7012	0.905971		20.7011	0.903577		20.7011	0.857995		20.7011	0.906153		20.7011	0.881156		20.7011	0.910033
20.7512	0.911089		20.7511	0.909199		20.7511	0.913477		20.7512	0.906738		20.7512	0.905214		20.7511	0.907135		20.7511	0.92128		20.7512	0.900936		20.7512	0.903344		20.7511	0.904386		20.7511	0.902927		20.7512	0.907247		20.7511	0.907368		20.7511	0.860159		20.7511	0.906743		20.7512	0.884174		20.7511	0.912967
20.8012	0.908292		20.8011	0.908867		20.8011	0.907789		20.8012	0.907731		20.8012	0.900682		20.8011	0.911401		20.8011	0.919606		20.8012	0.90523		20.8012	0.898028		20.8011	0.903552		20.8011	0.904898		20.8012	0.908034		20.8012	0.90633		20.8011	0.859011		20.8011	0.908385		20.8012	0.883444		20.8011	0.911771
20.8512	0.909132		20.8511	0.910151		20.8511	0.909917		20.8512	0.907589		20.8512	0.903999		20.8511	0.909418		20.8511	0.916996		20.8512	0.901931		20.8512	0.902079		20.8511	0.9043		20.8511	0.905234		20.8512	0.904847		20.8512	0.906977		20.8511	0.860945		20.8511	0.907144		20.8512	0.882783		20.8511	0.916222
20.9012	0.912409		20.9011	0.909004		20.9011	0.911536		20.9012	0.906926		20.9012	0.901977		20.9011	0.908995		20.9011	0.919457		20.9012	0.904214		20.9012	0.903689		20.9011	0.900912		20.9011	0.903137		20.9012	0.905759		20.9012	0.905333		20.9011	0.851175		20.9011	0.907259		20.9012	0.882797		20.9011	0.910578
20.9512	0.910765		20.9511	0.903936		20.9511	0.911369		20.9512	0.907066		20.9512	0.906608		20.9511	0.904133		20.9511	0.919696		20.9512	0.90431		20.9512	0.904051		20.9511	0.902108		20.9511	0.906181		20.9512	0.905664		20.9512	0.905738		20.9511	0.856874		20.9511	0.906394		20.9512	0.883233		20.9511	0.911744
21.0012	0.90916		21.0011	0.909832		21.0011	0.911992		21.0012	0.908096		21.0012	0.901423		21.0011	0.907405		21.0011	0.915223		21.0012	0.903911		21.0012	0.902279		21.0011	0.900657		21.0011	0.904233		21.0012	0.906405		21.0012	0.907193		21.0011	0.85906		21.0011	0.905593		21.0012	0.883027		21.0011	0.912779
21.0512	0.91789		21.0511	0.916405		21.0511	0.920239		21.0512	0.916203		21.0512	0.913302		21.0511	0.91325		21.0511	0.925165		21.0512	0.909173		21.0512	0.911213		21.0511	0.911375		21.0511	0.911286		21.0512	0.912791		21.0512	0.915547		21.0511	0.87092		21.0511	0.913536		21.0512	0.88932		21.0511	0.920003
21.1012	0.926386		21.1011	0.925596		21.1011	0.929221		21.1012	0.922679		21.1012	0.922883		21.1011	0.925557		21.1011	0.934835		21.1012	0.920853		21.1012	0.919763		21.1011	0.923257		21.1011	0.919322		21.1012	0.919559		21.1012	0.92356		21.1011	0.874489		21.1011	0.922099		21.1012	0.896628		21.1011	0.928549
21.1512	0.932552		21.1511	0.931049		21.1511	0.930427		21.1512	0.92906		21.1512	0.923911		21.1511	0.931649		21.1511	0.941063		21.1512	0.925893		21.1512	0.922145		21.1511	0.924541		21.1511	0.925748		21.1512	0.929591		21.1512	0.928791		21.1511	0.881679		21.1511	0.928732		21.1512	0.899526		21.1511	0.939346
21.2012	0.935762		21.2011	0.933474		21.2011	0.937581		21.2012	0.93386		21.2012	0.929859		21.2011	0.93319		21.2011	0.947358		21.2012	0.930246		21.2012	0.927319		21.2011	0.929276		21.2011	0.928049		21.2012	0.931484		21.2012	0.934719		21.2011	0.885864		21.2011	0.932763		21.2012	0.905286		21.2011	0.941171
21.2512	0.942281		21.2511	0.936483		21.2511	0.93906		21.2512	0.936085		21.2512	0.931625		21.2511	0.935896		21.2511	0.948635		21.2512	0.932385		21.2512	0.926761		21.2511	0.933237		21.2511	0.93276		21.2512	0.934259		21.2512	0.934701		21.2511	0.883899		21.2511	0.934452		21.2512	0.908167		21.2511	0.944979
21.3012	0.941388		21.3012	0.938872		21.3011	0.943345		21.3012	0.936102		21.3012	0.932798		21.3011	0.936051		21.3011	0.95013		21.3012	0.93381		21.3012	0.934366		21.3011	0.9307		21.3011	0.933032		21.3012	0.934979		21.3012	0.938314		21.3011	0.885963		21.3011	0.936144		21.3012	0.907287		21.3012	0.948953
21.3512	0.943464		21.3512	0.942316		21.3511	0.945487		21.3512	0.939906		21.3512	0.934798		21.3511	0.942576		21.3511	0.949907		21.3512	0.934357		21.3512	0.933896		21.3511	0.933084		21.3511	0.933345		21.3512	0.934942		21.3512	0.939266		21.3511	0.892056		21.3511	0.937392		21.3512	0.911803		21.3512	0.947552
21.4012	0.946709		21.4012	0.939642		21.4011	0.943119		21.4012	0.940362		21.4012	0.935692		21.4012	0.939985		21.4011	0.950962		21.4012	0.933525		21.4012	0.933671		21.4011	0.936411		21.4011	0.935644		21.4012	0.936788		21.4012	0.939402		21.4011	0.896622		21.4011	0.938741		21.4012	0.912404		21.4012	0.950113
21.4512	0.945404		21.4512	0.940461		21.4512	0.944664		21.4512	0.941921		21.4512	0.941974		21.4512	0.936927		21.4511	0.954611		21.4512	0.93676		21.4512	0.935787		21.4511	0.93494		21.4511	0.937171		21.4512	0.939596		21.4512	0.939708		21.4511	0.896284		21.4511	0.94065		21.4512	0.915517		21.4512	0.951046
21.5012	0.948335		21.5012	0.943533		21.5012	0.949041		21.5012	0.940206		21.5012	0.93644		21.5012	0.938841		21.5011	0.953014		21.5012	0.937061		21.5012	0.937556		21.5012	0.939051		21.5011	0.937922		21.5012	0.940594		21.5012	0.941164		21.5011	0.898302		21.5011	0.943199		21.5012	0.913654		21.5012	0.950902
21.5512	0.94804		21.5512	0.944891		21.5512	0.948047		21.5512	0.939734		21.5512	0.937679		21.5512	0.938599		21.5512	0.958816		21.5512	0.937743		21.5512	0.939178		21.5512	0.935783		21.5511	0.940715		21.5512	0.94121		21.5512	0.939085		21.5511	0.896571		21.5511	0.944721		21.5512	0.917086		21.5512	0.954237
21.6012	0.950539		21.6012	0.946445		21.6012	0.95009		21.6012	0.942588		21.6012	0.940273		21.6012	0.941635		21.6012	0.952471		21.6012	0.938312		21.6012	0.938847		21.6012	0.940817		21.6011	0.936132		21.6012	0.937699		21.6012	0.941932		21.6012	0.901841		21.6011	0.944468		21.6012	0.915404		21.6012	0.954374
21.6512	0.950456		21.6512	0.947128		21.6512	0.950839		21.6512	0.941678		21.6512	0.941364		21.6512	0.941816		21.6512	0.955994		21.6512	0.93978		21.6512	0.93822		21.6512	0.94106		21.6511	0.942068		21.6512	0.941875		21.6512	0.945172		21.6512	0.90322		21.6511	0.944697		21.6512	0.919955		21.6512	0.956976
21.7012	0.953671		21.7012	0.948778		21.7012	0.951246		21.7012	0.942378		21.7012	0.940843		21.7012	0.945153		21.7012	0.960163		21.7012	0.941257		21.7012	0.939442		21.7012	0.939627		21.7012	0.939066		21.7012	0.940023		21.7012	0.94283		21.7012	0.900638		21.7011	0.944008		21.7012	0.922995		21.7012	0.955788
21.7512	0.951391		21.7512	0.94808		21.7512	0.952209		21.7512	0.945479		21.7512	0.945575		21.7512	0.944097		21.7512	0.962176		21.7512	0.939031		21.7512	0.938881		21.7512	0.940401		21.7512	0.940998		21.7512	0.942166		21.7512	0.942398		21.7512	0.903028		21.7512	0.94414		21.7512	0.919337		21.7512	0.956979
21.8012	0.953562		21.8012	0.946077		21.8012	0.95171		21.8012	0.945074		21.8012	0.942647		21.8012	0.947808		21.8012	0.959657		21.8012	0.939087		21.8012	0.94394		21.8012	0.943892		21.8012	0.939389		21.8012	0.940478		21.8012	0.944711		21.8012	0.903291		21.8012	0.945265		21.8012	0.920632		21.8012	0.956167
21.8512	0.953751		21.8512	0.947709		21.8512	0.951758		21.8512	0.946203		21.8512	0.943352		21.8512	0.945648		21.8512	0.959228		21.8512	0.943182		21.8512	0.941961		21.8512	0.942657		21.8512	0.939548		21.8512	0.939568		21.8512	0.945728		21.8512	0.90707		21.8512	0.94554		21.8512	0.923529		21.8512	0.959191
21.9012	0.954238		21.9012	0.94908		21.9012	0.955236		21.9012	0.94502		21.9012	0.947206		21.9012	0.944096		21.9012	0.960761		21.9012	0.943024		21.9012	0.942428		21.9012	0.943181		21.9012	0.942806		21.9012	0.944416		21.9012	0.947753		21.9012	0.90834		21.9012	0.949204		21.9012	0.920988		21.9012	0.959041
21.9512	0.955613		21.9512	0.950869		21.9512	0.951275		21.9512	0.946591		21.9512	0.94541		21.9512	0.945207		21.9512	0.95974		21.9512	0.945304		21.9512	0.943328		21.9512	0.941174		21.9512	0.945646		21.9512	0.946478		21.9512	0.946381		21.9512	0.91255		21.9512	0.950519		21.9512	0.925418		21.9512	0.961459
21.9912	0.955613		21.9912	0.950869		21.9912	0.951275		21.9912	0.946591		21.9912	0.94541		21.9912	0.945207		21.9912	0.95974		21.9912	0.945304		21.9912	0.943328		21.9912	0.941174		21.9912	0.945646		21.9912	0.946478		21.9912	0.946381		21.9912	0.91255		21.9912	0.950519		21.9912	0.925418		21.9912	0.961459
