# Supplementary material for: Binding and sequestration of poison frog alkaloids by a plasma globulin
Source: eLife journal article supplement (doi:10.7554/elife.85096), 2023-12-14
Supplement: fig5-data1 [file PTX_nicotine_integrations.xlsx]

## Sheet: Sheet1
	m/z	RT
PTX M+1	252.233	10.2-10.9
Nicotine M+1	163.123	1.5-1.9
Condition	Sample	AUC_PTX	AUC_Nicotine	%below	avg % below	avg top amount
	00_Blank1_C18		0
	00_Blank2_C18		0
	100nM_STD	29174	130487
	1uM_STD	340438	939665
	10uM_STD	3.76787e+06	6.83596e+06
PTX	1_top	58948.5	0	0.293018	0.338417	56803.7
PTX	1_bottom	24432	0
PTX	2_top	52574.3	0	0.363782
PTX	2_bottom	30061.3	0
PTX	3_top	58888.2	0	0.358451
PTX	3_bottom	32902.5	0
PTX+ABG, pH=4	4_top	216967	0	0.00117047	0.000688767	246485
PTX+ABG, pH=4	4_bottom	254.25	0
PTX+ABG, pH=4	5_top	288248	0	0
PTX+ABG, pH=4	5_bottom	0	0
PTX+ABG, pH=4	6_top	234241	0	0.000895837
PTX+ABG, pH=4	6_bottom	210.03	0
PTX+ABG, pH=7	7_top	217797	0	0.00196347	0.0015938	217963
PTX+ABG, pH=7	7_bottom	428.48	0
PTX+ABG, pH=7	8_top	194787	0	0
PTX+ABG, pH=7	8_bottom	0	0
PTX+ABG, pH=7	9_top	241304	0	0.00281793
PTX+ABG, pH=7	9_bottom	681.9	0
PTX+ABG, pH=12	10_top	19390.5	0	0	0	17903.8
PTX+ABG, pH=12	10_bottom	0	0
PTX+ABG, pH=12	11_top	16345.4	0	0
PTX+ABG, pH=12	11_bottom	0	0
PTX+ABG, pH=12	12_top	17975.4	0	0
PTX+ABG, pH=12	12_bottom	0	0
Nicotine, pH = 7	13_top	268.62	722542	0.596412	0.583088
Nicotine, pH = 7	13_bottom	0	1.06775e+06
Nicotine, pH = 7	14_top	0	762912	0.587751
Nicotine, pH = 7	14_bottom	0	1.0877e+06
Nicotine, pH = 7	15_top	0	848526	0.565102
Nicotine, pH = 7	15_bottom	0	1.10257e+06
Nicotine+ABG, pH=7	16_top	0	755361	0.545405	0.554483
Nicotine+ABG, pH=7	16_bottom	0	906252
Nicotine+ABG, pH=7	17_top	0	729821	0.569291
Nicotine+ABG, pH=7	17_bottom	0	964642
Nicotine+ABG, pH=7	18_top	0	716980	0.548753
Nicotine+ABG, pH=7	18_bottom	0	871905
PTX+ABG+ELA2, pH=7	19_top	269457	0	0
PTX+ABG+ELA2, pH=7	19_bottom	0	0

## Sheet: just pH 7
	m/z	RT
PTX M+1	252.233	10.2-10.9
Nicotine M+1	163.123	1.5-1.9
Condition	Sample	AUC_PTX	AUC_Nicotine	%below
	100nM_STD	29174	130487
	1uM_STD	340438	939665
	10uM_STD	3.76787e+06	6.83596e+06
PTX	1_top	58948.5	0	0.293018
PTX	1_bottom	24432	0
PTX	2_top	52574.3	0	0.363782
PTX	2_bottom	30061.3	0
PTX	3_top	58888.2	0	0.358451
PTX	3_bottom	32902.5	0
PTX+ABG, pH=7	7_top	217797	0	0.00196347
PTX+ABG, pH=7	7_bottom	428.48	0
PTX+ABG, pH=7	8_top	194787	0	0
PTX+ABG, pH=7	8_bottom	0	0
PTX+ABG, pH=7	9_top	241304	0	0.00281793
PTX+ABG, pH=7	9_bottom	681.9	0
Nicotine, pH = 7	13_top	268.62	722542	0.596412
Nicotine, pH = 7	13_bottom	0	1.06775e+06
Nicotine, pH = 7	14_top	0	762912	0.587751
Nicotine, pH = 7	14_bottom	0	1.0877e+06
Nicotine, pH = 7	15_top	0	848526	0.565102
Nicotine, pH = 7	15_bottom	0	1.10257e+06
Nicotine+ABG, pH=7	16_top	0	755361	0.545405
Nicotine+ABG, pH=7	16_bottom	0	906252
Nicotine+ABG, pH=7	17_top	0	729821	0.569291
Nicotine+ABG, pH=7	17_bottom	0	964642
Nicotine+ABG, pH=7	18_top	0	716980	0.548753
Nicotine+ABG, pH=7	18_bottom	0	871905
